# Supplementary material for: Combined transcriptome and proteome profiling reveals specific molecular brain signatures for sex, maturation and circalunar clock phase
Source: eLife. 2019 Feb 15;8:e41556. doi: 10.7554/eLife.41556 (PMC6377233; doi:10.7554/eLife.41556)
Supplement: Figure 1—source data 1. — Table depicting maturation satge, sex and lunar phase of the samples included in this study. [file elife-41556-fig1-data1.xlsx]

## Sheet:  
Sample name	Stage	Moon phase	# BR	used for
IM_NM+FM	Immature	New Moon + Full moon	1	transcriptome assembly
IM_FRFM	Immature	Free-running Full moon	1
PM_NM_Female	Premature	New Moon	1
PM_FM_Female	Premature	Full moon	1
PM_FRFM_Female	Premature	Free-running Full moon	1
PM_NM_Male	Premature	New Moon	1
PM_FM_Male	Premature	Full moon	1
PM_FRFM_Male	Premature	Free-running Full moon	1
M_NM_Female	Mature	New Moon	1
M_NM_Male	Mature	New Moon	1
IM_NM	Immature	New Moon	3	differential expression analysis
IM_FRFM	Immature	Free-running Full moon	3
PM_NM_Female	Premature	New Moon	3
PM_FRFM_Female	Premature	Free-running Full moon	3
PM_NM_Male	Premature	New Moon	3
PM_FRFM_Male	Premature	Free-running Full moon	3
M_NM_Female	Mature	New Moon	3
M_NM_Male	Mature	New Moon	3
