# Supplementary material for: Combined transcriptome and proteome profiling reveals specific molecular brain signatures for sex, maturation and circalunar clock phase
Source: eLife. 2019 Feb 15;8:e41556. doi: 10.7554/eLife.41556 (PMC6377233; doi:10.7554/eLife.41556)
Supplement: Figure 1—source data 2. — Table showing the different comparions made for DET/DEP predictions. [file elife-41556-fig1-data2.xlsx]

## Sheet:  
	IM_NM	PM_NM_Female	PM_NM_Male	M_NM_Female	M_NM_Male	IM_FRFM	PM_FRFM_Female	PM_FRFM_Male
IM_NM	x	ü	ü	ü	ü	ü
PM_NM_Female	ü	x	ü	ü			ü
PM_NM_Male	ü	ü	x		ü
M_NM_Female	ü	ü		x	ü			ü
M_NM_Male	ü		ü	ü	x
IM_FRFM	ü					x	ü	ü
PM_FRFM_Female		ü				ü	x	ü
PM_FRFM_Male			ü			ü	ü	x
