# Supplementary material for: Combined transcriptome and proteome profiling reveals specific molecular brain signatures for sex, maturation and circalunar clock phase
Source: eLife. 2019 Feb 15;8:e41556. doi: 10.7554/eLife.41556 (PMC6377233; doi:10.7554/eLife.41556)
Supplement: Figure 3—source data 4. — File containing DESeq predicted DETs for all 14 comparision made. Each comparison is contained within a separate tab. [file elife-41556-fig3-data4.xlsx]

## Sheet: IM_NM vs PM_NM_Female
	baseMean	log2FoldChange	lfcSE	stat	pvalue	padj
comp2274374_c0_seq4	720.195	-4.18616	0.378552	-11.0584	1.99724e-28	9.14356e-24
comp2269871_c0_seq1	1603.2	-5.10095	0.603337	-8.45457	2.80119e-17	6.41207e-13
comp2273016_c0_seq4	4492.41	-4.87072	0.595266	-8.18242	2.78204e-16	4.24549e-12
comp2247380_c0_seq1	102.747	-4.05061	0.501527	-8.07656	6.66185e-16	7.62465e-12
comp2259130_c0_seq2	23.8641	-4.11638	0.540592	-7.61457	2.64568e-14	2.42244e-10
comp2267127_c0_seq1	389.656	-2.791	0.410344	-6.80161	1.03456e-11	7.89385e-08
comp2226460_c0_seq1	360.621	-4.28931	0.633671	-6.76899	1.29688e-11	8.48176e-08
comp2252042_c0_seq1	127.8	-2.0596	0.307034	-6.70806	1.97233e-11	1.12869e-07
comp2272964_c0_seq1	154.157	-2.91162	0.444298	-6.55331	5.62746e-11	2.86256e-07
comp2279899_c0_seq1	13.7277	-3.75392	0.599621	-6.26048	3.83786e-10	1.75701e-06
comp2259229_c0_seq1	170.882	-3.07939	0.518414	-5.94002	2.84993e-09	9.97489e-06
comp2267260_c0_seq1	525.559	-2.45245	0.411509	-5.95966	2.52759e-09	9.97489e-06
comp2277462_c0_seq1	115.415	-1.79575	0.302882	-5.92886	3.05036e-09	9.97489e-06
comp2278332_c0_seq1	745.933	-1.87494	0.315435	-5.94398	2.78187e-09	9.97489e-06
comp2239753_c0_seq1	82.2254	-3.04936	0.519743	-5.86706	4.43585e-09	1.35385e-05
comp2236094_c0_seq1	87.1168	-2.39249	0.408961	-5.85018	4.91044e-09	1.40503e-05
comp2277164_c0_seq2	676.271	-2.41655	0.414958	-5.8236	5.75925e-09	1.55096e-05
comp2258476_c0_seq2	28.8666	-3.0259	0.522811	-5.78776	7.13295e-09	1.7062e-05
comp2261851_c1_seq1	1383.24	-1.78367	0.307686	-5.79703	6.75006e-09	1.7062e-05
comp2276586_c0_seq3	266.705	-3.04491	0.526767	-5.78037	7.45373e-09	1.7062e-05
comp2259749_c0_seq5	128.986	-1.50013	0.262619	-5.7122	1.11526e-08	2.37579e-05
comp2276855_c0_seq1	309.949	-1.47684	0.258722	-5.70821	1.14168e-08	2.37579e-05
comp2267586_c4_seq1	23.0088	2.60778	0.460339	5.66491	1.47099e-08	2.92798e-05
comp2276181_c0_seq4	228.078	-1.7946	0.317584	-5.65078	1.59721e-08	3.04675e-05
comp2246635_c0_seq1	132.102	-2.38564	0.424549	-5.61924	1.91797e-08	3.51226e-05
comp2255776_c1_seq1	20.1322	-3.01854	0.53887	-5.60161	2.12364e-08	3.73933e-05
comp2263164_c1_seq3	95.7875	-2.45859	0.440093	-5.58652	2.31667e-08	3.92813e-05
comp2276636_c0_seq3	418.783	-1.70157	0.305463	-5.57046	2.5407e-08	4.15413e-05
comp2268991_c0_seq1	15.4904	-3.18988	0.601985	-5.29894	1.16475e-07	0.000183874
comp2257660_c0_seq2	103.515	-2.02503	0.384521	-5.26638	1.39143e-07	0.000212337
comp2269413_c0_seq1	549.504	-1.9358	0.369313	-5.24161	1.59182e-07	0.000235081
comp2258284_c0_seq4	522.953	-2.38211	0.455207	-5.23302	1.66761e-07	0.000238578
comp2276667_c0_seq4	248.508	-1.41251	0.271068	-5.21092	1.87908e-07	0.000260685
comp1935108_c0_seq1	230.298	-1.49202	0.287121	-5.19649	2.03083e-07	0.000271559
comp2274631_c0_seq3	127.683	-2.22448	0.428845	-5.18715	2.13541e-07	0.000271559
comp2278107_c0_seq27	523.867	-1.56976	0.302573	-5.18805	2.12513e-07	0.000271559
comp2279447_c0_seq1	87.6403	-3.17547	0.614768	-5.16531	2.40042e-07	0.00029701
comp2265661_c0_seq2	523.475	-1.23486	0.240313	-5.13854	2.76882e-07	0.000304549
comp2267060_c0_seq1	256.715	-1.76173	0.342882	-5.13801	2.77659e-07	0.000304549
comp2267687_c0_seq2	72.7602	-1.90743	0.371324	-5.13684	2.79397e-07	0.000304549
comp2273034_c0_seq1	165.824	-2.01924	0.392941	-5.13878	2.76531e-07	0.000304549
comp2276498_c0_seq1	790.77	-2.40757	0.468435	-5.13961	2.75313e-07	0.000304549
comp2254419_c0_seq1	587.337	-1.43688	0.280474	-5.12302	3.00673e-07	0.000320119
comp2269080_c0_seq1	82.1929	-2.49436	0.488756	-5.10349	3.33444e-07	0.000346941
comp2236190_c0_seq1	22.8368	-2.82685	0.562014	-5.02985	4.90853e-07	0.000488516
comp2257701_c0_seq1	104.839	-1.91439	0.380328	-5.03353	4.81528e-07	0.000488516
comp2276498_c2_seq1	281.354	-2.27861	0.457517	-4.98039	6.34574e-07	0.000618116
comp2244049_c0_seq3	22.6219	-2.98678	0.606703	-4.92297	8.524e-07	0.000812995
comp2133746_c1_seq1	15.001	-2.75494	0.56161	-4.90543	9.32228e-07	0.000870986
comp2265751_c0_seq4	462.568	-2.20669	0.452112	-4.88085	1.0563e-06	0.000967169
comp2254542_c0_seq1	1313.13	-2.68552	0.551815	-4.8667	1.13475e-06	0.00100656
comp2274713_c1_seq7	1235.99	-2.0322	0.417699	-4.86522	1.14329e-06	0.00100656
comp2250456_c0_seq1	25.2973	-2.82586	0.582274	-4.85315	1.21517e-06	0.00104966
comp2277499_c0_seq2	1768.65	-1.63341	0.337011	-4.84675	1.25501e-06	0.00106399
comp2273455_c0_seq2	726.775	-1.22586	0.253772	-4.83055	1.36157e-06	0.00113335
comp2256595_c0_seq1	39.3858	-2.56496	0.535489	-4.78995	1.66824e-06	0.00133989
comp2274934_c0_seq9	3795.23	-1.43455	0.299277	-4.7934	1.6398e-06	0.00133989
comp1195281_c0_seq2	40.7066	-1.64836	0.345554	-4.7702	1.84044e-06	0.00145271
comp2262619_c1_seq2	312.909	-1.70587	0.358418	-4.75944	1.94132e-06	0.00150636
comp2268389_c0_seq1	189.39	-0.997406	0.20986	-4.75271	2.00705e-06	0.00153141
comp2251338_c0_seq8	151.069	-1.463	0.311954	-4.68978	2.735e-06	0.00205264
comp2235779_c0_seq1	66.6651	-2.33101	0.499884	-4.6631	3.11482e-06	0.0023
comp2275560_c0_seq10	241.396	-1.23361	0.264743	-4.65965	3.1675e-06	0.00230177
comp2259397_c0_seq12	23.8119	-1.9042	0.409601	-4.6489	3.33704e-06	0.00238708
comp2198403_c0_seq2	108.994	-1.51374	0.32819	-4.61239	3.98056e-06	0.0026213
comp2260220_c0_seq4	23.9412	2.36014	0.510997	4.61869	3.86167e-06	0.0026213
comp2263067_c0_seq4	4733.34	-1.62939	0.353237	-4.61273	3.9741e-06	0.0026213
comp2267132_c0_seq2	71.0614	-1.87387	0.406382	-4.61111	4.00523e-06	0.0026213
comp2275532_c0_seq1	234.041	-1.87364	0.406343	-4.61097	4.00802e-06	0.0026213
comp2276461_c0_seq7	521.785	-1.76041	0.381387	-4.6158	3.91591e-06	0.0026213
comp2262931_c0_seq2	647.654	-3.19448	0.6948	-4.59769	4.27191e-06	0.00275454
comp2261689_c0_seq1	201.724	-1.83432	0.399435	-4.59228	4.38437e-06	0.00278779
comp2268249_c0_seq4	92.3145	2.20725	0.481112	4.58781	4.47923e-06	0.00280909
comp2221142_c0_seq1	2871.61	-2.05913	0.450496	-4.5708	4.85876e-06	0.00300593
comp2265327_c0_seq1	72.8424	-1.86687	0.409925	-4.55416	5.25953e-06	0.00321049
gnl|Pdu_trscr_assembly_1|335847	164.231	-1.62467	0.357666	-4.54241	5.56159e-06	0.00330669
comp2262943_c0_seq1	7.00149	-2.68306	0.590391	-4.54454	5.50554e-06	0.00330669
comp2247744_c0_seq2	234.987	1.43043	0.315803	4.5295	5.91245e-06	0.00347023
comp2231262_c0_seq2	42.3393	-1.82455	0.403111	-4.52618	6.00586e-06	0.00348043
comp2229224_c0_seq1	32.4772	1.88134	0.416973	4.51189	6.42519e-06	0.0036315
comp2265878_c0_seq2	257.952	-1.68742	0.373876	-4.51331	6.3825e-06	0.0036315
comp2236689_c0_seq1	29.6252	-2.1993	0.48784	-4.50823	6.53708e-06	0.00364968
comp2271544_c0_seq1	299.052	-1.55617	0.346353	-4.49301	7.02229e-06	0.00387334
comp2277661_c0_seq18	534.724	-1.03827	0.231786	-4.47945	7.48359e-06	0.00404288
comp2279863_c0_seq1	5.45396	-2.79801	0.624722	-4.4788	7.50627e-06	0.00404288
comp2254460_c0_seq1	36.6527	-1.95493	0.437911	-4.46422	8.03603e-06	0.00422871
comp2260026_c0_seq1	48.8415	-2.13834	0.478805	-4.46599	7.96978e-06	0.00422871
comp2248673_c0_seq2	5.71391	2.72608	0.611503	4.458	8.27297e-06	0.00430392
comp2252193_c0_seq2	552.782	-1.73386	0.393517	-4.40606	1.05266e-05	0.00541482
comp2259529_c0_seq1	2072.67	-1.62169	0.368903	-4.39598	1.10274e-05	0.00557016
comp2277608_c0_seq2	150.489	-1.03506	0.235507	-4.39504	1.10751e-05	0.00557016
comp2279369_c0_seq1	25.2278	-2.44129	0.555758	-4.39273	1.11936e-05	0.00557016
comp2265663_c1_seq31	3679.96	-1.53468	0.350323	-4.38074	1.18275e-05	0.00576036
comp2271881_c0_seq1	67.1219	-2.0041	0.457421	-4.3813	1.17971e-05	0.00576036
comp2216329_c0_seq2	6.43157	2.70426	0.618651	4.37122	1.23553e-05	0.00589205
comp2251605_c0_seq1	694.271	-2.21227	0.506067	-4.3715	1.23393e-05	0.00589205
comp2257713_c0_seq1	261.426	-1.22426	0.281239	-4.35311	1.34222e-05	0.00629442
comp2276498_c1_seq1	193.117	-2.18582	0.502226	-4.35226	1.3474e-05	0.00629442
comp2266735_c0_seq5	296.814	-1.48	0.34037	-4.3482	1.37259e-05	0.0062946
comp2269996_c0_seq1	194.479	-1.79658	0.413214	-4.34783	1.37494e-05	0.0062946
comp2221747_c1_seq1	16.2377	-2.62596	0.604843	-4.34156	1.41475e-05	0.00641274
comp2252994_c0_seq2	42.4379	-2.00644	0.464065	-4.32362	1.53487e-05	0.00684382
gnl|Pdu_trscr_assembly_1|19790	282.401	-1.14796	0.265553	-4.32292	1.53975e-05	0.00684382
comp2245335_c0_seq1	78.7866	-2.3689	0.549505	-4.31096	1.62544e-05	0.00715521
comp2142040_c0_seq1	143.933	-2.41984	0.563186	-4.2967	1.73359e-05	0.00755863
comp2268784_c1_seq20	7047.21	-1.32069	0.308303	-4.28376	1.83764e-05	0.00793671
comp2255351_c1_seq2	23.8799	-1.65957	0.388954	-4.26676	1.98335e-05	0.00848596
comp1194173_c0_seq1	9.25356	-2.67155	0.627752	-4.25574	2.08356e-05	0.00861358
comp2251422_c0_seq2	58.7877	-1.39433	0.327676	-4.25522	2.08844e-05	0.00861358
comp2270565_c0_seq2	349.5	-1.00056	0.234941	-4.25875	2.05571e-05	0.00861358
comp2276667_c1_seq1	65.9474	-1.81416	0.426254	-4.25606	2.08058e-05	0.00861358
comp2139301_c0_seq1	17.99	-2.58854	0.609089	-4.24986	2.13904e-05	0.00874352
comp2274999_c0_seq4	3817.87	-1.82863	0.432152	-4.23144	2.32199e-05	0.00940734
comp2199649_c0_seq2	141.817	-1.90991	0.452251	-4.22312	2.40939e-05	0.00956524
comp2258100_c0_seq2	37.1325	-2.33502	0.553088	-4.2218	2.42364e-05	0.00956524
comp2275820_c0_seq6	987.722	-1.16967	0.277042	-4.22201	2.42129e-05	0.00956524
comp2251960_c0_seq1	24.0298	2.1948	0.520819	4.21414	2.50733e-05	0.00981095
comp2264311_c1_seq1	183.393	-1.90626	0.45319	-4.20633	2.59556e-05	0.0100701
comp2254440_c0_seq1	47.6307	1.44036	0.344097	4.18591	2.84023e-05	0.0108357
comp2270119_c0_seq15	1179.56	-1.68748	0.403091	-4.18635	2.83481e-05	0.0108357
comp2244553_c1_seq1	501.659	-2.21564	0.529925	-4.18104	2.90183e-05	0.0108986
comp2264027_c0_seq3	855.337	-1.70774	0.408468	-4.18084	2.90433e-05	0.0108986
comp2254348_c0_seq1	71.1745	-1.59106	0.381158	-4.17429	2.98922e-05	0.0110363
comp2254643_c0_seq2	28150.4	-1.35781	0.325271	-4.17438	2.98793e-05	0.0110363
comp2272798_c0_seq1	110.897	-1.25092	0.300528	-4.16242	3.14894e-05	0.0115329
comp2272093_c0_seq1	1250.48	-1.1937	0.287252	-4.15559	3.24454e-05	0.0117887
comp2255199_c0_seq1	8.29347	2.82021	0.680526	4.14416	3.41068e-05	0.0122948
comp2261740_c0_seq2	25.2271	-1.46161	0.353331	-4.13664	3.52422e-05	0.0123162
gnl|Pdu_trscr_assembly_1|263843	180.276	-1.80407	0.436075	-4.13706	3.51788e-05	0.0123162
comp2272774_c0_seq2	72.3239	-1.75949	0.425086	-4.13914	3.48607e-05	0.0123162
comp2262137_c0_seq3	731.127	1.85643	0.448252	4.14149	3.45064e-05	0.0123162
comp2258861_c0_seq2	115.985	-2.30637	0.559005	-4.12586	3.69359e-05	0.0128103
comp1981028_c0_seq1	107.068	-1.41332	0.342911	-4.12155	3.76339e-05	0.0128766
comp2251281_c0_seq2	9.56555	-2.39122	0.580224	-4.1212	3.76896e-05	0.0128766
comp2269443_c0_seq1	7.75777	-2.39642	0.582432	-4.1145	3.88017e-05	0.0131584
comp2256237_c0_seq1	181.768	-2.22435	0.542011	-4.10388	4.06275e-05	0.0136362
comp2257264_c1_seq1	544.527	-1.50576	0.367002	-4.10287	4.08064e-05	0.0136362
comp2243178_c0_seq2	20.4677	-1.60684	0.392784	-4.0909	4.29708e-05	0.0142554
comp2266374_c0_seq1	256.736	-1.91877	0.469483	-4.08698	4.37025e-05	0.0143938
comp2261589_c0_seq1	45.5686	-1.62471	0.39777	-4.08456	4.41604e-05	0.0144408
comp2254913_c0_seq2	27.9942	-2.04926	0.502543	-4.07779	4.54663e-05	0.0147044
comp2259598_c0_seq4	5.09363	-2.62399	0.6436	-4.07706	4.56091e-05	0.0147044
comp2267765_c0_seq1	2292.48	-1.80017	0.442363	-4.06944	4.71262e-05	0.0149825
comp2274900_c0_seq10	485.353	-1.39811	0.343542	-4.06968	4.7077e-05	0.0149825
comp2216604_c0_seq2	20.6216	2.69818	0.665433	4.05478	5.01825e-05	0.0157417
comp2269146_c0_seq1	28359.9	-0.992652	0.244816	-4.05469	5.02019e-05	0.0157417
comp2269417_c0_seq1	180.347	-1.34524	0.33193	-4.05277	5.06144e-05	0.0157631
comp2251922_c0_seq3	32.535	1.80107	0.44543	4.04344	5.26718e-05	0.0161593
comp2267155_c0_seq2	659.422	-1.29072	0.319235	-4.04315	5.27376e-05	0.0161593
comp2277150_c1_seq4	1886.82	-1.60085	0.396032	-4.04223	5.29455e-05	0.0161593
comp2267488_c0_seq1	7.36871	-2.5592	0.633679	-4.03863	5.3764e-05	0.0163005
comp1194334_c0_seq1	1465.1	-1.29657	0.321454	-4.03345	5.49632e-05	0.0165544
comp2258896_c0_seq1	6.72636	-2.64012	0.654847	-4.03166	5.53841e-05	0.0165721
comp2269532_c0_seq13	3671.87	-2.18111	0.541299	-4.02939	5.59216e-05	0.0166243
comp2037149_c0_seq1	1049.1	-1.97421	0.490349	-4.02614	5.67003e-05	0.0167471
comp2277832_c2_seq4	137.505	-1.45086	0.36052	-4.02436	5.71302e-05	0.0167659
comp2244052_c0_seq1	8.65323	-2.53365	0.631225	-4.01386	5.97326e-05	0.0174011
comp2266589_c0_seq3	812.658	-1.46284	0.364562	-4.01259	6.0055e-05	0.0174011
comp2267342_c0_seq3	23.3973	1.35429	0.338025	4.00649	6.16286e-05	0.0177448
comp2262017_c0_seq2	219.206	-1.47062	0.367527	-4.0014	6.297e-05	0.0180177
comp2272620_c1_seq2	53.1746	-1.69306	0.424186	-3.99133	6.57039e-05	0.0186832
comp2270482_c0_seq4	329.689	1.10773	0.277657	3.98956	6.61949e-05	0.0187066
comp2166111_c0_seq1	5.9337	2.77436	0.697723	3.9763	6.99954e-05	0.0192205
comp2221749_c0_seq2	338.853	-0.666373	0.167663	-3.97448	7.05325e-05	0.0192205
comp2257559_c1_seq2	84.7991	-1.94787	0.489799	-3.97687	6.9827e-05	0.0192205
comp2267040_c0_seq2	465.384	-1.92752	0.484897	-3.97512	7.03446e-05	0.0192205
comp2273312_c0_seq15	131.599	-1.44218	0.362848	-3.9746	7.04964e-05	0.0192205
comp2276902_c0_seq7	233.371	-1.32674	0.333393	-3.97952	6.90537e-05	0.0192205
comp2257559_c0_seq1	26.7418	-2.02313	0.509348	-3.972	7.12705e-05	0.0193067
comp2268292_c0_seq2	204.096	-1.98411	0.500066	-3.96769	7.25732e-05	0.0194297
comp2274417_c0_seq2	1798.21	-1.56665	0.394765	-3.96855	7.23102e-05	0.0194297
comp2065624_c0_seq3	700.604	-2.20934	0.557443	-3.96335	7.39056e-05	0.0195576
comp2273207_c0_seq5	904.488	-1.41068	0.355895	-3.96375	7.37821e-05	0.0195576
comp2222975_c0_seq1	27.0325	2.42957	0.615795	3.94541	7.96631e-05	0.0209601
comp2201951_c0_seq1	11.5407	2.72429	0.691782	3.93807	8.21389e-05	0.021488
comp2265229_c0_seq2	394.566	-1.81627	0.461727	-3.93363	8.36708e-05	0.0217644
comp2242943_c0_seq1	21.8876	-1.75463	0.447655	-3.9196	8.86956e-05	0.0229411
comp2271448_c1_seq3	249.46	-1.57692	0.402604	-3.9168	8.97313e-05	0.0230786
comp2263897_c0_seq7	442.299	2.31255	0.591176	3.91179	9.16162e-05	0.0234317
comp2241498_c0_seq2	133.693	-1.9834	0.50727	-3.90996	9.23127e-05	0.0234787
comp2270547_c0_seq3	63.8578	-1.43738	0.368621	-3.89933	9.64578e-05	0.0243974
comp2138099_c0_seq1	445.94	-1.79493	0.460528	-3.89755	9.71691e-05	0.0244423
comp2268904_c0_seq2	118.54	-1.74782	0.448686	-3.89543	9.80266e-05	0.0244967
comp2274415_c0_seq2	391.272	-1.21986	0.313237	-3.89437	9.84554e-05	0.0244967
comp1975390_c0_seq1	237.194	-1.42658	0.366868	-3.88855	0.000100847	0.0249561
comp2229085_c0_seq1	22.3967	-1.85133	0.476472	-3.8855	0.000102119	0.025135
comp2235159_c0_seq1	4.66645	2.56237	0.660187	3.88128	0.000103909	0.0254388
comp2275034_c0_seq1	9.96657	2.30628	0.594546	3.87907	0.000104858	0.0255347
comp2265351_c0_seq1	302.515	-1.39851	0.361129	-3.87262	0.000107672	0.0260812
comp2252294_c0_seq3	3.68508	-2.38686	0.617689	-3.86417	0.000111466	0.0264405
comp2266186_c0_seq8	281.818	-1.54674	0.400245	-3.86447	0.00011133	0.0264405
comp2272507_c0_seq3	573.896	-1.87792	0.485901	-3.86481	0.000111175	0.0264405
comp2274603_c0_seq1	689.564	-1.59415	0.412276	-3.86671	0.000110315	0.0264405
comp2274070_c0_seq1	9.26897	2.09045	0.541309	3.86184	0.000112536	0.0265568
comp2254253_c1_seq2	11.9794	1.94521	0.503983	3.85967	0.00011354	0.0266563
comp2278328_c1_seq1	1023.04	-1.11289	0.289181	-3.84841	0.000118885	0.0277688
gnl|Pdu_trscr_assembly_1|1043	998.238	-1.35595	0.35255	-3.84612	0.000120004	0.0278879
comp2276603_c2_seq11	2488.03	-1.75485	0.456931	-3.84051	0.000122781	0.028389
comp2254845_c0_seq2	29.0829	-1.68936	0.440326	-3.8366	0.000124747	0.0285552
comp2269775_c0_seq5	30.3397	-1.92382	0.501356	-3.83723	0.000124432	0.0285552
comp2243922_c0_seq1	30.3471	-1.72955	0.451061	-3.83441	0.000125866	0.0286681
comp2188826_c0_seq1	16.2668	2.66363	0.695832	3.82797	0.000129205	0.0289957
comp2221079_c1_seq1	8.61913	2.1374	0.558246	3.82878	0.000128778	0.0289957
comp2269593_c0_seq3	850.332	-1.3485	0.35213	-3.82955	0.000128377	0.0289957
comp2273403_c0_seq2	5639.72	-1.07724	0.282479	-3.81351	0.000137008	0.030597
comp2269403_c0_seq8	1130.31	-1.03882	0.272634	-3.81029	0.000138802	0.0308471
comp2228189_c0_seq2	10.7642	-2.00854	0.527624	-3.80677	0.000140792	0.0309885
comp2266834_c0_seq1	102.168	-2.04314	0.536609	-3.8075	0.000140379	0.0309885
comp2275240_c0_seq5	76.3438	2.34995	0.617739	3.80412	0.000142312	0.0311731
comp2261362_c0_seq2	1055.96	-1.65173	0.435293	-3.79451	0.000147934	0.0322503
comp2185796_c0_seq1	5.27735	-2.63571	0.695896	-3.78751	0.000152162	0.0326197
comp2195212_c0_seq1	36.7336	-2.05055	0.54132	-3.78805	0.000151834	0.0326197
comp2195994_c0_seq1	78.1373	-1.90638	0.502935	-3.7905	0.000150342	0.0326197
comp2272847_c1_seq1	16.4786	-2.1241	0.560892	-3.787	0.000152479	0.0326197
comp2214237_c0_seq1	130.225	-1.65237	0.43728	-3.77875	0.000157616	0.0335619
comp2275684_c0_seq21	207.74	-0.979922	0.259569	-3.77519	0.000159885	0.0338874
comp2275975_c0_seq1	183.225	-1.55719	0.41275	-3.77273	0.000161471	0.0340658
comp2190011_c0_seq1	16.8454	-1.84056	0.489636	-3.75904	0.000170567	0.0356562
comp2237367_c0_seq1	47.3623	-1.25615	0.334149	-3.75926	0.000170417	0.0356562
comp2254406_c0_seq1	155.286	-1.12412	0.299457	-3.75386	0.000174135	0.0362368
comp2139879_c0_seq2	10.0381	-2.00833	0.535296	-3.75181	0.000175563	0.0363686
comp2239040_c0_seq1	116.282	-1.05667	0.282255	-3.74368	0.000181345	0.0370334
comp2246567_c0_seq1	8.87933	2.30765	0.616467	3.74335	0.000181584	0.0370334
comp2249401_c0_seq2	36.5611	-1.26034	0.336669	-3.74357	0.000181426	0.0370334
comp2254641_c1_seq1	806.385	-1.44973	0.387344	-3.74276	0.000182008	0.0370334
comp2260931_c0_seq2	45.1692	-1.80874	0.484216	-3.73539	0.000187426	0.0379671
comp2271527_c3_seq2	425.429	-1.63593	0.438428	-3.73137	0.000190443	0.0384082
comp2261576_c0_seq2	4074.25	-1.61077	0.432504	-3.72429	0.000195863	0.0391563
comp2272220_c0_seq5	159.19	-0.813281	0.218349	-3.72469	0.000195557	0.0391563
comp2265357_c0_seq1	95.2006	-1.22428	0.329107	-3.72001	0.000199213	0.039653
comp2265607_c0_seq2	43.4268	1.13362	0.304885	3.71819	0.000200658	0.0397676
comp2267592_c0_seq1	271.225	-1.21639	0.327542	-3.71369	0.000204262	0.0403074
comp2199263_c0_seq2	1900.29	1.57523	0.424652	3.70945	0.000207713	0.0408125
comp2262980_c0_seq1	356.299	-1.89966	0.512825	-3.7043	0.000211972	0.0414714
comp2254544_c0_seq2	87.8471	-1.86247	0.50304	-3.70242	0.000213551	0.0415595
comp2272039_c0_seq1	468.922	-1.40584	0.379793	-3.70161	0.000214238	0.0415595
comp2274258_c0_seq1	7.0203	2.17559	0.588155	3.69901	0.000216444	0.0418103
comp2268126_c1_seq2	237.018	-1.01904	0.27575	-3.69553	0.000219428	0.0422085
comp1769718_c0_seq1	1110.98	-1.61421	0.436966	-3.69413	0.000220637	0.0422636
comp2270281_c0_seq1	142.63	-0.965253	0.261595	-3.68987	0.000224369	0.0427994
comp2272842_c1_seq2	1218.92	-1.44347	0.391704	-3.68509	0.000228623	0.0434298
comp2268857_c0_seq2	3204.31	-1.84643	0.502886	-3.67167	0.000240967	0.0455855
comp1897486_c1_seq1	8.28746	2.24449	0.611837	3.66844	0.000244036	0.0456747
comp2245053_c0_seq1	141.305	-1.43095	0.390071	-3.66844	0.000244034	0.0456747
comp2274581_c1_seq6	1268.68	-0.910362	0.248189	-3.66803	0.000244431	0.0456747
comp2253990_c0_seq2	2.69873	-2.54038	0.693237	-3.66452	0.000247801	0.0461161
comp2267356_c1_seq8	369.61	-1.15969	0.316856	-3.66	0.000252215	0.0467476
comp2269845_c0_seq3	84.93	-1.4236	0.389273	-3.65708	0.000255107	0.0470929
comp2269142_c2_seq8	89.1683	-1.46633	0.401492	-3.65219	0.00026001	0.0477822
comp2270901_c0_seq1	43.9221	1.64557	0.450808	3.65026	0.000261972	0.0477822
comp2275952_c0_seq1	46.1563	-1.88927	0.517559	-3.65036	0.000261877	0.0477822
comp2239053_c0_seq1	30.0007	-1.68329	0.461348	-3.64864	0.000263629	0.0478936
comp2238675_c0_seq2	14.0299	-1.62372	0.445366	-3.64582	0.000266542	0.0482315
comp1211891_c0_seq1_contamination	15.3484	2.0253	0.556073	3.64215	0.000270366	0.0487309
comp1194044_c0_seq1	139.9	1.10145	0.302589	3.64009	0.000272542	0.0489303
comp2188878_c0_seq2	11.3103	2.42782	0.667958	3.6347	0.00027831	0.0497707
comp2219987_c0_seq3	102.253	2.33169	0.642364	3.62985	0.000283581	0.0505161
comp2240169_c0_seq2	38.0053	-2.02467	0.55821	-3.62709	0.000286637	0.0508626
comp2256432_c0_seq1	15.4622	1.75893	0.485414	3.62357	0.000290568	0.0513609
comp2228128_c0_seq1	47.013	1.25618	0.346955	3.62059	0.000293928	0.0516893
comp2262136_c0_seq3	431.838	-0.558453	0.154272	-3.61993	0.000294684	0.0516893
comp2269459_c0_seq2	668.243	-1.52395	0.421183	-3.61826	0.000296592	0.0518255
comp2240664_c0_seq1	338.812	-1.70339	0.471632	-3.6117	0.000304196	0.0526183
comp2242891_c0_seq2_contamination	5.02379	2.36658	0.655312	3.61138	0.000304577	0.0526183
comp2272079_c0_seq3	221.532	-1.0527	0.291453	-3.61191	0.000303953	0.0526183
comp2198805_c0_seq1	55.181	-1.57518	0.43641	-3.6094	0.000306905	0.0528211
comp2244422_c0_seq2	11.9285	-1.55093	0.429837	-3.60818	0.000308351	0.0528712
comp2270788_c0_seq7	262.896	-1.07179	0.297174	-3.60661	0.000310219	0.0529931
comp2262101_c0_seq1	54.0514	1.38183	0.383384	3.60429	0.000313002	0.0530723
comp2266248_c0_seq1	187.882	0.937624	0.260108	3.60475	0.000312459	0.0530723
comp2258178_c0_seq3	85.8895	-1.94518	0.539957	-3.60247	0.000315211	0.0532497
comp2232368_c0_seq1	7.93233	2.12851	0.592615	3.59173	0.000328487	0.0552885
gnl|Pdu_trscr_assembly_1|6033	77.826	-1.67122	0.465479	-3.59033	0.000330259	0.0553831
comp2260302_c0_seq2	502.663	-1.5288	0.426051	-3.5883	0.000332846	0.0556132
comp1436856_c0_seq1	5.66678	2.12808	0.593301	3.58684	0.000334707	0.0557208
comp2259573_c0_seq1	444.659	1.81709	0.507147	3.58296	0.000339721	0.0563506
comp2272423_c0_seq3	55.3152	-1.68558	0.470931	-3.57924	0.000344595	0.0569527
comp1194364_c0_seq1	1731.14	1.5977	0.447203	3.57264	0.000353398	0.0575762
comp2210440_c0_seq1_contamination	17.8759	1.65305	0.462635	3.57312	0.000352758	0.0575762
comp2251523_c0_seq1	159.51	-1.77626	0.497122	-3.57309	0.000352798	0.0575762
comp2269957_c0_seq3	372.034	-0.924045	0.258623	-3.57294	0.000352993	0.0575762
comp2255402_c1_seq1	11.8969	1.54852	0.433783	3.5698	0.000357248	0.057997
comp2278093_c0_seq2	1681.06	-0.62414	0.174889	-3.56877	0.000358661	0.0580206
comp2225479_c0_seq3	25.6271	-1.90226	0.533483	-3.56573	0.00036284	0.0581993
comp2233006_c0_seq1	9.63654	2.1075	0.59113	3.5652	0.000363579	0.0581993
comp2266754_c1_seq3	255.967	-1.05201	0.29499	-3.56625	0.000362124	0.0581993
comp1194078_c0_seq1	68.5541	1.20441	0.338139	3.56187	0.000368223	0.0585334
comp2262794_c0_seq1	10.5428	2.43162	0.682663	3.56196	0.000368091	0.0585334
comp2245403_c1_seq1	3.26048	2.34184	0.658384	3.55695	0.000375188	0.0594342
gnl|Pdu_trscr_assembly_1|14372	199.11	-1.52547	0.429469	-3.552	0.000382312	0.0603539
comp2246896_c0_seq1	51.2882	-1.5358	0.432897	-3.54772	0.000388579	0.0609231
comp2263011_c0_seq1	4425.61	-1.48997	0.419947	-3.548	0.000388172	0.0609231
comp2258072_c1_seq3	55280.6	-1.04299	0.294341	-3.54346	0.000394909	0.0617043
comp2194184_c0_seq1	3.92091	2.37589	0.670929	3.54119	0.000398323	0.0619508
comp2256540_c0_seq2	171.19	-1.42167	0.401531	-3.54062	0.000399194	0.0619508
comp2240351_c0_seq2	268.097	-1.41655	0.400304	-3.53869	0.000402116	0.0620451
comp2256299_c0_seq1	28.1558	-1.5955	0.450906	-3.53843	0.000402512	0.0620451
comp1177049_c0_seq1	8.63466	-1.9932	0.563598	-3.53657	0.000405358	0.0620659
comp2250815_c0_seq1	16.9611	-1.94076	0.548731	-3.53681	0.000404992	0.0620659
comp2186694_c0_seq1	9.06522	-2.04234	0.578643	-3.52953	0.000416301	0.0630273
comp2262142_c0_seq2	1636.33	-1.77284	0.502489	-3.52812	0.000418521	0.0630273
comp2263827_c0_seq1	91.8394	-0.974838	0.27624	-3.52896	0.000417198	0.0630273
comp2272437_c1_seq1	17038.2	1.45531	0.412279	3.52992	0.000415692	0.0630273
comp2274429_c0_seq1	2096.31	-1.37441	0.389277	-3.53068	0.000414501	0.0630273
comp1193922_c0_seq1_contamination	3.20172	2.37133	0.672705	3.52507	0.000423365	0.0633402
comp2272490_c0_seq11	82.1045	-1.65416	0.469185	-3.5256	0.000422526	0.0633402
comp2253021_c0_seq2	58.6551	-1.11112	0.315373	-3.52321	0.000426353	0.0635794
comp2271803_c0_seq1	196.188	-0.8206	0.233239	-3.51827	0.000434366	0.0645637
comp2273280_c0_seq5	17.6138	2.00701	0.570733	3.51656	0.000437184	0.0645637
comp2274985_c0_seq18	86.2043	-1.39894	0.397783	-3.51683	0.000436727	0.0645637
comp2239600_c0_seq1	54.5622	-1.1065	0.314887	-3.51398	0.000441452	0.0649842
comp2252728_c0_seq3	206.47	-1.74064	0.495492	-3.51295	0.000443161	0.0650268
gnl|Pdu_trscr_assembly_1|92475	7.66168	2.28877	0.652336	3.50857	0.000450516	0.0658948
comp1177027_c0_seq1	48.4853	-1.62773	0.464191	-3.50659	0.000453883	0.0661241
comp2272996_c4_seq1	3.60563	2.26426	0.645833	3.50595	0.000454972	0.0661241
comp2276033_c0_seq1	298.918	-0.786766	0.224924	-3.49792	0.000468894	0.0679318
comp2240417_c0_seq1	59.7535	1.44651	0.413637	3.49704	0.000470452	0.0679424
comp2237963_c0_seq1	53.5839	-1.50845	0.431584	-3.49514	0.000473811	0.0680362
comp2246829_c0_seq1	10.5274	2.17503	0.622376	3.49471	0.000474569	0.0680362
gnl|Pdu_trscr_assembly_1|202903	103.287	-1.05335	0.301461	-3.49416	0.00047556	0.0680362
comp2221095_c0_seq1	571.552	-1.86236	0.533574	-3.49036	0.00048237	0.0685868
comp2259412_c0_seq3	254.92	1.78412	0.511282	3.48951	0.000483902	0.0685868
comp2276839_c0_seq1	1155.01	-0.70109	0.200882	-3.49007	0.0004829	0.0685868
comp2272495_c0_seq1	3738.7	-0.976495	0.280039	-3.487	0.00048848	0.0690219
comp2267983_c1_seq2	116.899	2.18077	0.62587	3.48439	0.000493269	0.0692711
comp2277510_c2_seq1	1006.2	-1.52485	0.437569	-3.48483	0.000492446	0.0692711
comp2248412_c0_seq1	23.5823	-1.15817	0.332784	-3.48025	0.000500954	0.0701351
gnl|Pdu_trscr_assembly_1|16825	1679.25	-0.759445	0.218327	-3.47847	0.000504289	0.0703868
comp2273980_c0_seq1	25.9048	-1.71637	0.494177	-3.47319	0.000514311	0.0715675
comp2262789_c0_seq1	29.1634	-1.27788	0.36803	-3.47223	0.000516162	0.0716074
comp2278132_c0_seq9	818.795	-1.24168	0.357777	-3.47055	0.000519385	0.0718367
comp2247737_c0_seq1	46.3286	-1.10824	0.319516	-3.4685	0.000523364	0.0720412
comp2248898_c1_seq1	10.4467	2.28927	0.660234	3.46737	0.000525584	0.0720412
comp2259222_c0_seq1	42.1979	-0.973617	0.280758	-3.46781	0.000524712	0.0720412
comp2260208_c0_seq1	16367.2	-1.01792	0.293711	-3.46573	0.0005288	0.0720505
comp2260646_c0_seq1	68.6071	-1.30127	0.375447	-3.46591	0.000528437	0.0720505
comp2138762_c0_seq1	3.22292	2.30098	0.665705	3.45645	0.000547332	0.0724942
comp2219123_c0_seq1	15.7515	-1.7012	0.49185	-3.45878	0.000542621	0.0724942
comp2221045_c0_seq2	12.6505	-1.92596	0.556788	-3.45905	0.000542079	0.0724942
comp2232905_c0_seq1	25.9298	-1.42142	0.411269	-3.45618	0.000547891	0.0724942
comp2245947_c0_seq1	39.5138	-2.03941	0.589419	-3.46004	0.000540104	0.0724942
comp2253152_c0_seq1	1708.47	1.09981	0.31765	3.46233	0.000535513	0.0724942
comp2254237_c0_seq5	417.264	-1.4315	0.41339	-3.46284	0.000534503	0.0724942
comp2259145_c0_seq1	22.9403	1.51965	0.439564	3.45719	0.000545845	0.0724942
comp2269280_c1_seq3	240.564	-1.01235	0.292886	-3.45647	0.000547293	0.0724942
comp2271856_c0_seq4	14.8901	1.88828	0.546123	3.45762	0.000544979	0.0724942
comp2250112_c0_seq1	135.794	-1.54	0.446143	-3.45181	0.000556849	0.0732467
comp2261423_c0_seq7	148.044	-1.14733	0.332347	-3.45222	0.000555999	0.0732467
comp2269107_c0_seq1	19.1089	-2.18792	0.633985	-3.45107	0.000558378	0.0732467
comp2271448_c0_seq1	128.911	-1.85656	0.5381	-3.45022	0.000560134	0.0732671
comp2181096_c0_seq3	6.90268	1.98456	0.575526	3.44826	0.000564213	0.0734071
comp2216390_c0_seq1	3.17295	2.12981	0.617664	3.44816	0.000564411	0.0734071
comp2178895_c0_seq1	5.05175	-1.96397	0.570288	-3.44383	0.000573547	0.0739649
comp2198797_c0_seq2	29.7566	-1.60519	0.466007	-3.44456	0.000571991	0.0739649
comp2269093_c0_seq2	46.2548	-1.85652	0.539086	-3.44383	0.000573546	0.0739649
comp2243394_c0_seq1	3.84387	2.21295	0.643378	3.43958	0.000582616	0.0749234
comp2263988_c0_seq8	624.629	-1.07252	0.311949	-3.43813	0.000585736	0.0749424
comp2272883_c0_seq2	186.327	-1.30471	0.379497	-3.438	0.000586037	0.0749424
comp2282548_c0_seq1	28.3376	1.32077	0.38428	3.43699	0.000588223	0.0750123
comp2198984_c0_seq2	5.98559	1.83902	0.535411	3.43478	0.000593045	0.0751822
comp2226856_c1_seq1	26.19	2.36416	0.688318	3.43469	0.000593239	0.0751822
comp2275471_c1_seq2	291.22	-0.666514	0.194086	-3.43412	0.000594481	0.0751822
comp2248857_c0_seq2	10.6603	-1.78183	0.519131	-3.43234	0.000598401	0.0752621
comp2270178_c0_seq4	1140.15	-1.45796	0.424769	-3.43237	0.000598331	0.0752621
comp2199471_c0_seq1	174.828	0.784738	0.228865	3.42882	0.000606212	0.0755899
comp2252932_c0_seq1	12.0719	2.08698	0.608602	3.42915	0.000605485	0.0755899
gnl|Pdu_trscr_assembly_1|21031	57.0504	-1.36956	0.399585	-3.42746	0.000609263	0.0755899
comp2267668_c1_seq1	10.2624	2.07714	0.60592	3.42808	0.000607873	0.0755899
comp2271575_c0_seq13	748.486	-1.31111	0.382531	-3.42747	0.000609236	0.0755899
comp2256344_c0_seq1	19.4536	-1.9567	0.571228	-3.42544	0.000613814	0.0756168
comp2266233_c0_seq1	4447.67	-1.99321	0.581888	-3.42542	0.000613847	0.0756168
comp2271545_c0_seq4	1257.96	-0.855886	0.249882	-3.42516	0.000614435	0.0756168
comp1188083_c0_seq1	4.43881	2.21753	0.647977	3.42224	0.000621085	0.0762303
comp2269638_c0_seq1	248.747	-1.57827	0.461428	-3.4204	0.000625283	0.0765403
comp2221608_c0_seq2	33.7836	0.988976	0.289339	3.41805	0.000630716	0.0769995
comp2227128_c0_seq1	2.8045	2.30733	0.675316	3.41667	0.000633922	0.077185
comp2254831_c2_seq1	7.15252	2.12513	0.622326	3.41481	0.000638269	0.0773032
comp2260946_c0_seq3	3.27797	-2.34682	0.687156	-3.41527	0.000637187	0.0773032
comp2235059_c0_seq1	2.8339	2.35938	0.691549	3.41173	0.00064552	0.0778968
comp2278539_c0_seq2	52782.1	-0.883831	0.25909	-3.41129	0.000646574	0.0778968
comp2143762_c0_seq1	5.1538	2.00732	0.588652	3.41003	0.000649547	0.0779865
comp2219038_c0_seq1	9.09856	2.29658	0.673613	3.40935	0.000651177	0.0779865
comp2256492_c0_seq2	49.3838	-1.01401	0.297467	-3.40883	0.000652428	0.0779865
comp2273846_c1_seq2	166.721	-1.53946	0.451788	-3.40747	0.000655671	0.07817
comp2248934_c0_seq1	200.986	-0.948085	0.278622	-3.40277	0.000667069	0.0791168
comp2272334_c3_seq2	257.656	-0.751684	0.220892	-3.40294	0.000666642	0.0791168
comp2199677_c0_seq1	56.1628	-1.64075	0.482358	-3.40152	0.000670124	0.0792738
comp2194347_c0_seq1	9.90377	1.7311	0.509651	3.39663	0.000682209	0.0804905
comp2245652_c0_seq1	12.6726	1.20325	0.354321	3.39594	0.000683925	0.0804905
comp2265750_c2_seq11	1286.04	-1.0569	0.311571	-3.39214	0.000693479	0.0811973
comp2266917_c0_seq4	64.7723	-1.65882	0.488925	-3.3928	0.000691834	0.0811973
comp2264685_c0_seq2	291.829	-1.52249	0.449284	-3.38871	0.000702222	0.0820113
comp2237429_c0_seq1	104.082	-1.75643	0.518433	-3.38795	0.000704159	0.0820283
comp2226073_c0_seq2	43.6566	-1.94793	0.575273	-3.38609	0.000708959	0.0823778
comp2266844_c0_seq4	954.205	-1.19618	0.353336	-3.38539	0.000710762	0.0823782
comp2253854_c0_seq1	54.0382	-1.3042	0.385386	-3.38415	0.000713993	0.0825437
comp2258619_c0_seq2	1192.67	-1.44169	0.426465	-3.38056	0.000723386	0.0832093
comp2259417_c0_seq1	85.5524	1.47667	0.436739	3.38113	0.000721895	0.0832093
comp2266044_c0_seq2	317.568	-1.74597	0.516697	-3.37909	0.00072725	0.0834442
comp2266125_c1_seq1	10.7867	1.5724	0.465528	3.37767	0.000731034	0.0836687
comp2139149_c0_seq1	3.70635	2.28975	0.678118	3.37662	0.000733816	0.0837776
comp2201737_c0_seq1	75.8211	1.03965	0.308003	3.37546	0.000736914	0.0838248
comp2264910_c2_seq1	179.033	-1.392	0.412431	-3.3751	0.000737891	0.0838248
gnl|Pdu_trscr_assembly_1|334139	778.045	-1.30756	0.388307	-3.36734	0.000758959	0.0849029
comp2216423_c1_seq1	2.87639	2.36442	0.702111	3.36759	0.000758288	0.0849029
comp2254650_c0_seq2	136.777	-2.32592	0.690905	-3.36649	0.000761309	0.0849029
comp2257775_c0_seq2	696.788	-0.73124	0.216941	-3.37069	0.000749805	0.0849029
comp2262283_c0_seq1	65.909	-1.24319	0.369129	-3.3679	0.000757421	0.0849029
comp2263907_c0_seq1	223.862	-1.10621	0.328483	-3.36765	0.000758126	0.0849029
comp2267005_c0_seq1	141.312	-1.79651	0.533698	-3.36615	0.000762265	0.0849029
comp2269582_c1_seq1	4.44608	2.27484	0.675932	3.36549	0.000764072	0.0849029
comp2276997_c1_seq12	2156.69	-1.6325	0.484409	-3.37009	0.000751445	0.0849029
comp2274799_c0_seq13	586.754	-1.10989	0.330065	-3.36264	0.000772012	0.0855774
comp2273570_c0_seq3	279.146	-0.62369	0.18566	-3.35931	0.000781378	0.0864065
comp2269040_c0_seq3	6.38585	2.02879	0.604288	3.35733	0.000786996	0.0868179
comp1954733_c0_seq1	55.3197	-1.23366	0.367828	-3.3539	0.000796815	0.0868541
comp2142373_c0_seq1	14.2325	-1.42683	0.425579	-3.35269	0.000800315	0.0868541
comp2262283_c1_seq4	158.517	-1.49648	0.446218	-3.3537	0.000797377	0.0868541
comp2270115_c0_seq5	76.7042	-0.911877	0.271915	-3.35353	0.000797872	0.0868541
comp2270511_c0_seq3	60.8454	1.24964	0.372738	3.35259	0.000800604	0.0868541
comp2278179_c0_seq5	1283.01	-0.638715	0.190331	-3.35581	0.000791318	0.0868541
comp2278218_c0_seq1	2337.86	-1.21277	0.361589	-3.354	0.000796523	0.0868541
comp2235913_c0_seq4	119.863	0.886632	0.264897	3.34708	0.000816684	0.0880945
comp2258527_c0_seq1	350.399	-0.89372	0.267046	-3.3467	0.000817811	0.0880945
comp2265084_c0_seq1	603.415	-1.70328	0.508827	-3.34746	0.000815563	0.0880945
comp2274488_c0_seq1	80.2676	-0.862106	0.257909	-3.34267	0.000829757	0.0891716
comp2140307_c0_seq1	29.5616	-1.61528	0.483881	-3.33817	0.000843324	0.0892165
comp2262377_c0_seq1	5.58017	2.08534	0.624322	3.34016	0.000837291	0.0892165
comp2262679_c0_seq1	6.6513	1.7949	0.537821	3.33737	0.000845765	0.0892165
comp2263957_c0_seq7	331.938	-0.691352	0.207152	-3.33741	0.000845619	0.0892165
comp2271675_c0_seq2	677.585	-1.48357	0.444117	-3.34049	0.000836306	0.0892165
comp2272783_c0_seq2	396.864	-0.815123	0.244041	-3.34011	0.000837454	0.0892165
comp2276993_c0_seq6	174.291	-1.35061	0.404383	-3.33993	0.000837994	0.0892165
comp2278002_c0_seq15	2265.35	-0.683074	0.204577	-3.33896	0.000840939	0.0892165
comp2259302_c1_seq5	30.157	1.20334	0.360714	3.33601	0.0008499	0.0894466
comp2246012_c0_seq2	19514.3	-1.53161	0.459278	-3.33481	0.000853576	0.0896275
comp2037008_c0_seq1	5.00159	1.82069	0.546425	3.332	0.000862244	0.0902195
comp2233927_c0_seq2	3.42435	2.1422	0.642973	3.33171	0.000863156	0.0902195
comp2139953_c0_seq1	14.3706	1.71565	0.515811	3.32612	0.00088064	0.0910616
comp2236614_c0_seq1	760.346	-1.18439	0.356137	-3.32565	0.000882141	0.0910616
comp2262258_c0_seq3	20.4451	-1.60274	0.481886	-3.32597	0.000881113	0.0910616
comp2263452_c3_seq3	251.49	-0.798562	0.240145	-3.32533	0.000883147	0.0910616
comp2268813_c0_seq2	178.984	-1.54819	0.465179	-3.32817	0.000874183	0.0910616
isotig10568	3256.76	1.50198	0.451343	3.32781	0.000875313	0.0910616
comp2266656_c0_seq1	391.567	-0.552118	0.166104	-3.32393	0.000887598	0.0911101
comp2278275_c0_seq8	613.601	-0.910688	0.273962	-3.32414	0.000886909	0.0911101
comp2246430_c0_seq1	27.5706	-2.0701	0.622989	-3.32285	0.000891043	0.0912591
comp2260017_c0_seq3	16.414	1.56065	0.470215	3.31902	0.000903346	0.0922164
comp2274646_c1_seq2	152.087	-0.872051	0.26277	-3.31869	0.000904418	0.0922164
comp2138000_c0_seq1	692.776	-1.29516	0.390462	-3.31698	0.00090995	0.0925743
comp2230385_c0_seq1	10.0999	2.18757	0.660522	3.31189	0.000926686	0.0940679
comp2265364_c0_seq1	33.1425	-1.38668	0.418902	-3.31028	0.000932038	0.0944019
comp2266747_c0_seq1	388.51	-1.41634	0.428266	-3.30715	0.000942508	0.0952515
comp2142128_c0_seq1	62.3603	-1.62417	0.491625	-3.30368	0.000954237	0.0955929
comp2228757_c0_seq3	6.93679	2.01515	0.609802	3.3046	0.000951106	0.0955929
comp2276591_c0_seq15	424.999	-0.872786	0.264136	-3.30431	0.000952105	0.0955929
comp2280000_c0_seq1_contamination	23.1126	1.96631	0.595171	3.30377	0.000953926	0.0955929
comp2234148_c0_seq2	24.5388	-1.21266	0.367275	-3.30177	0.000960765	0.0960367
comp2272525_c2_seq9	38.5453	-1.27207	0.385533	-3.29952	0.000968502	0.0965991
comp2226860_c0_seq1	27.5895	-1.90653	0.578139	-3.2977	0.000974804	0.0970163
comp2278393_c0_seq13	6.89571	2.02744	0.615177	3.2957	0.000981769	0.0974975
comp2268048_c0_seq16	158.114	1.44327	0.438162	3.29393	0.000987963	0.0976889
comp2271781_c0_seq9	705.749	-2.05442	0.62368	-3.29403	0.000987624	0.0976889
comp2237921_c0_seq1	29.8114	1.39051	0.422595	3.29041	0.00100042	0.0987073
comp2209411_c0_seq2	95.2092	-1.74851	0.531887	-3.28737	0.00101129	0.0994784
comp2271844_c0_seq1	6439.56	-0.969576	0.295026	-3.2864	0.00101475	0.0994784
comp2273129_c0_seq7	714.649	-1.96358	0.597402	-3.28687	0.00101307	0.0994784

## Sheet: IM_NM vs PM_NM_Male
	baseMean	log2FoldChange	lfcSE	stat	pvalue	padj
comp2200231_c1_seq1	240.578	-5.21971	0.694665	-7.514	5.73472e-14	1.70447e-09
comp2279271_c0_seq1	24.5307	-4.38578	0.628929	-6.97341	3.0935e-12	4.59725e-08
comp2231117_c0_seq1	16.6433	-4.35541	0.638223	-6.82427	8.83717e-12	5.25317e-08
comp2244843_c0_seq4	17.8252	-4.63208	0.677512	-6.83689	8.09281e-12	5.25317e-08
comp2268323_c0_seq1	80.157	-4.47989	0.656165	-6.82738	8.64775e-12	5.25317e-08
comp2258476_c0_seq2	28.8666	-3.52021	0.522825	-6.73306	1.66128e-11	8.22943e-08
comp2247432_c0_seq1	49.9635	-3.75714	0.589015	-6.37867	1.78632e-10	7.5847e-07
comp2252042_c0_seq1	127.8	-1.93815	0.307958	-6.29356	3.10273e-10	1.15274e-06
comp2267940_c1_seq3	155.039	-3.80139	0.606483	-6.26792	3.65903e-10	1.20837e-06
comp2277336_c1_seq6	1715.44	-2.28702	0.369028	-6.19741	5.74012e-10	1.70608e-06
comp2247380_c0_seq1	102.747	-3.10382	0.502665	-6.17473	6.62759e-10	1.79077e-06
comp2259749_c0_seq5	128.986	-1.59247	0.263377	-6.04636	1.48157e-09	3.66959e-06
comp2236689_c0_seq1	29.6252	-2.919	0.487038	-5.99337	2.05533e-09	4.69911e-06
comp2257660_c0_seq2	103.515	-2.29396	0.384796	-5.96149	2.4995e-09	5.30644e-06
comp2267260_c0_seq1	525.559	-2.42378	0.411625	-5.88832	3.90137e-09	7.73043e-06
comp2276727_c0_seq2	50.5374	-2.74624	0.470298	-5.83937	5.23987e-09	9.7337e-06
comp2269538_c0_seq1	103.406	-3.68435	0.634137	-5.81002	6.24666e-09	1.09214e-05
comp2197726_c1_seq1	27.078	-3.38139	0.590052	-5.73067	1.00035e-08	1.56486e-05
comp2261851_c1_seq1	1383.24	-1.76394	0.307757	-5.73159	9.94962e-09	1.56486e-05
comp2269080_c0_seq1	82.1929	-2.72942	0.489028	-5.58131	2.38711e-08	3.54749e-05
comp2267342_c0_seq3	23.3973	1.98172	0.355692	5.57144	2.52645e-08	3.57577e-05
comp2247744_c0_seq2	234.987	1.74486	0.31737	5.49789	3.84365e-08	5.19277e-05
comp2266084_c0_seq1	28.4261	2.11079	0.385899	5.46979	4.50581e-08	5.82268e-05
comp2255776_c1_seq1	20.1322	-2.90057	0.540551	-5.36595	8.05258e-08	9.97245e-05
comp2251540_c0_seq1	29.6667	-3.42717	0.64164	-5.34127	9.22976e-08	0.000109731
comp2274415_c0_seq2	391.272	-1.66652	0.313268	-5.31979	1.03889e-07	0.000118762
comp2278332_c0_seq1	745.933	-1.67217	0.315623	-5.298	1.17077e-07	0.00012888
comp2267586_c4_seq1	23.0088	2.43949	0.464213	5.25511	1.4794e-07	0.000157038
comp2272964_c0_seq1	154.157	-2.33429	0.445	-5.24561	1.55769e-07	0.000159647
comp2276134_c0_seq2	83.0572	-2.75963	0.536729	-5.14156	2.72471e-07	0.000269946
comp2221608_c0_seq2	33.7836	1.52309	0.301126	5.05797	4.23743e-07	0.000406274
comp2229493_c0_seq1	113.322	-3.56962	0.707281	-5.04696	4.48904e-07	0.000416948
comp2263114_c0_seq2	39.3568	-3.41223	0.68544	-4.97816	6.41926e-07	0.000578162
comp2275106_c0_seq3	33.1029	-2.8196	0.579007	-4.86973	1.11752e-06	0.000976906
comp2276498_c2_seq1	281.354	-2.21987	0.457681	-4.85025	1.23304e-06	0.0010471
comp2267077_c0_seq2	749.137	-1.4025	0.290915	-4.82099	1.4285e-06	0.00117939
comp2142040_c0_seq1	143.933	-2.71058	0.563262	-4.81229	1.49208e-06	0.00118277
comp2277462_c0_seq1	115.415	-1.46364	0.304316	-4.80962	1.51219e-06	0.00118277
comp2276498_c0_seq1	790.77	-2.2312	0.468506	-4.76238	1.9132e-06	0.00145806
comp2266186_c0_seq8	281.818	-1.89654	0.400313	-4.73763	2.16231e-06	0.00157433
comp2277164_c0_seq2	676.271	-1.96654	0.415165	-4.73675	2.17171e-06	0.00157433
comp2140307_c0_seq1	29.5616	-2.27892	0.483367	-4.71467	2.421e-06	0.00167342
comp2276667_c0_seq4	248.508	-1.28204	0.271767	-4.71744	2.38826e-06	0.00167342
comp2236614_c0_seq1	760.346	-1.67122	0.35614	-4.69258	2.69784e-06	0.00181079
comp2274876_c0_seq3	3047.37	-0.987568	0.210601	-4.68929	2.74158e-06	0.00181079
comp2234463_c0_seq2	256.642	-2.85561	0.610038	-4.68103	2.85431e-06	0.00184425
comp2277499_c0_seq2	1768.65	-1.57054	0.337087	-4.65915	3.17517e-06	0.00200792
comp2267060_c0_seq1	256.715	-1.59219	0.34336	-4.63708	3.53369e-06	0.00218809
comp2221749_c0_seq2	338.853	-0.77615	0.16843	-4.60816	4.06256e-06	0.00240843
comp2254293_c0_seq3	20.0782	2.7818	0.604136	4.6046	4.13263e-06	0.00240843
comp2263164_c1_seq3	95.7875	-2.03384	0.441054	-4.61133	4.00103e-06	0.00240843
comp2236094_c0_seq1	87.1168	-1.87963	0.410294	-4.58117	4.62377e-06	0.00259298
comp2257701_c0_seq1	104.839	-1.74659	0.381198	-4.58184	4.60913e-06	0.00259298
comp2198805_c0_seq1	55.181	-1.98028	0.436635	-4.53532	5.7517e-06	0.00316578
comp2276498_c1_seq1	193.117	-2.27593	0.502373	-4.53037	5.88816e-06	0.00318196
comp2275684_c0_seq21	207.74	-1.1768	0.259986	-4.52639	5.99999e-06	0.0031845
comp2246635_c0_seq1	132.102	-1.90909	0.425483	-4.48688	7.22742e-06	0.00376865
comp2274731_c0_seq1	6112.98	-1.83312	0.409593	-4.47547	7.62447e-06	0.00390714
comp2272220_c0_seq5	159.19	-0.977399	0.219267	-4.45757	8.28953e-06	0.00417595
comp2264311_c1_seq1	183.393	-2.01793	0.453402	-4.45064	8.56159e-06	0.00424112
comp2278539_c0_seq2	52782.1	-1.14118	0.259092	-4.40454	1.06008e-05	0.0051652
comp2273329_c0_seq3	251.195	-1.12953	0.258211	-4.37445	1.2174e-05	0.00583605
comp2256595_c0_seq1	39.3858	-2.334	0.536637	-4.34932	1.36562e-05	0.00624445
comp2258284_c0_seq4	522.953	-1.98098	0.455381	-4.35015	1.36043e-05	0.00624445
comp2273312_c0_seq15	131.599	-1.5822	0.363261	-4.35554	1.32738e-05	0.00624445
comp2277661_c0_seq18	534.724	-1.00866	0.232137	-4.34511	1.39203e-05	0.0062688
comp2263067_c0_seq4	4733.34	-1.53274	0.35326	-4.33884	1.43239e-05	0.00635425
comp2265607_c0_seq2	43.4268	1.34901	0.312044	4.32315	1.53816e-05	0.00671862
comp2274631_c0_seq3	127.683	-1.85599	0.429621	-4.32008	1.55974e-05	0.00671862
comp2221142_c0_seq1	2871.61	-1.93686	0.450517	-4.2992	1.71418e-05	0.00727839
comp2261228_c0_seq1	231.27	-1.3608	0.317245	-4.28943	1.79131e-05	0.00746025
comp2273034_c0_seq1	165.824	-1.68824	0.393762	-4.28747	1.80721e-05	0.00746025
comp2273024_c0_seq1	113.117	-2.10752	0.49238	-4.28027	1.86665e-05	0.00760007
comp2254664_c0_seq1	58.624	-1.93043	0.452103	-4.2699	1.95565e-05	0.00785483
comp2269238_c0_seq1	398.504	-1.24298	0.291327	-4.2666	1.98471e-05	0.00786526
comp2243820_c0_seq1	100.775	-1.45189	0.34174	-4.24854	2.15171e-05	0.00827542
gnl|Pdu_trscr_assembly_1|335847	164.231	-1.51926	0.358249	-4.24078	2.22742e-05	0.00827542
comp2268313_c1_seq4	864.304	-1.83635	0.432665	-4.24428	2.19297e-05	0.00827542
comp2272893_c0_seq2	233.327	-2.11021	0.497477	-4.24183	2.21708e-05	0.00827542
comp2275532_c0_seq1	234.041	-1.7268	0.406729	-4.24558	2.18031e-05	0.00827542
comp2198403_c0_seq2	108.994	-1.3924	0.329356	-4.22764	2.36152e-05	0.00855966
comp2245426_c0_seq2	431.357	-0.844293	0.199676	-4.22831	2.35449e-05	0.00855966
comp2269146_c0_seq1	28359.9	-1.03434	0.244828	-4.22475	2.39203e-05	0.00856578
comp2267420_c0_seq2	83.2448	-2.7234	0.649249	-4.19469	2.73247e-05	0.00966839
comp2258072_c1_seq3	55280.6	-1.22912	0.294343	-4.1758	2.96934e-05	0.0101442
comp2270639_c0_seq2	23.3304	-2.58731	0.61915	-4.17881	2.93041e-05	0.0101442
comp2276461_c0_seq7	521.785	-1.59391	0.38157	-4.17725	2.95056e-05	0.0101442
comp2258861_c0_seq2	115.985	-2.33066	0.559507	-4.16557	3.10581e-05	0.0101725
comp2267870_c0_seq2	62.1313	-2.16094	0.518177	-4.17028	3.04228e-05	0.0101725
comp2269341_c0_seq4	50.1159	-2.11116	0.506498	-4.16815	3.07078e-05	0.0101725
comp2276839_c0_seq1	1155.01	-0.837296	0.201035	-4.16493	3.11453e-05	0.0101725
comp2231262_c0_seq2	42.3393	-1.67978	0.405686	-4.14058	3.46423e-05	0.0111917
comp2273455_c0_seq2	726.775	-1.05141	0.254194	-4.13624	3.53037e-05	0.0112828
comp2258781_c0_seq1	280.32	-1.07614	0.261263	-4.11898	3.8055e-05	0.0120327
comp2254542_c0_seq1	1313.13	-2.27133	0.551859	-4.11577	3.8589e-05	0.0120731
comp2251422_c0_seq2	58.7877	-1.35315	0.329478	-4.10693	4.00949e-05	0.0124136
comp2235322_c0_seq1	186.734	-1.66833	0.407471	-4.09435	4.23358e-05	0.0128947
comp2258100_c0_seq2	37.1325	-2.26787	0.554037	-4.09336	4.25167e-05	0.0128947
comp1769718_c0_seq1	1110.98	-1.78358	0.437004	-4.0814	4.4766e-05	0.0133053
comp2256299_c0_seq1	28.1558	-1.84669	0.452305	-4.08285	4.44866e-05	0.0133053
comp2245335_c0_seq1	78.7866	-2.24273	0.549967	-4.07794	4.54361e-05	0.0133708
comp2255351_c1_seq2	23.8799	-1.59777	0.393306	-4.06241	4.85688e-05	0.0134912
comp2259397_c0_seq12	23.8119	-1.69369	0.416738	-4.06417	4.82044e-05	0.0134912
comp2262619_c1_seq2	312.909	-1.4616	0.35883	-4.07323	4.63655e-05	0.0134912
comp2265327_c0_seq1	72.8424	-1.67162	0.411267	-4.06456	4.81223e-05	0.0134912
comp2271734_c0_seq2	85.3416	-2.07278	0.509217	-4.07053	4.69056e-05	0.0134912
comp2272576_c1_seq4	1097.42	-1.17816	0.289773	-4.06579	4.78693e-05	0.0134912
comp2249384_c0_seq1	78.8905	-1.62385	0.400785	-4.05167	5.08529e-05	0.0139381
comp2265661_c0_seq2	523.475	-0.975859	0.240925	-4.05047	5.11156e-05	0.0139381
comp1935108_c0_seq1	230.298	-1.16594	0.288151	-4.04627	5.20402e-05	0.0140613
comp2274934_c0_seq9	3795.23	-1.20728	0.299325	-4.03334	5.49894e-05	0.0147243
comp2250678_c0_seq1	25.1528	-2.09537	0.520098	-4.02879	5.60641e-05	0.0147535
comp2270565_c0_seq2	349.5	-0.948226	0.23549	-4.02661	5.65878e-05	0.0147535
comp2271881_c0_seq1	67.1219	-1.8477	0.45865	-4.02856	5.61205e-05	0.0147535
comp2272039_c0_seq1	468.922	-1.52711	0.379944	-4.01931	5.83676e-05	0.0150852
comp2254040_c0_seq2	22.4672	2.06913	0.515767	4.01175	6.02713e-05	0.015443
comp2266293_c0_seq6	135.998	-0.981762	0.245928	-3.99207	6.55001e-05	0.0165941
comp2276304_c1_seq32	2792	-1.06917	0.267917	-3.99069	6.58807e-05	0.0165941
comp2199649_c0_seq2	141.817	-1.80149	0.452711	-3.97933	6.91094e-05	0.0171172
comp2264027_c0_seq3	855.337	-1.62619	0.408556	-3.98033	6.88193e-05	0.0171172
comp2269417_c0_seq1	180.347	-1.32058	0.332479	-3.97192	7.12951e-05	0.0173894
comp2272315_c0_seq6	158.302	-0.943584	0.23758	-3.97164	7.13784e-05	0.0173894
comp2254845_c0_seq2	29.0829	-1.74929	0.44213	-3.95651	7.60542e-05	0.0183779
comp2267365_c0_seq1	15.7363	-1.84924	0.467765	-3.95335	7.70637e-05	0.0184717
comp2278106_c0_seq4	45.3136	-1.84155	0.467129	-3.94226	8.07177e-05	0.0191927
comp2255222_c0_seq1	32.35	-1.32395	0.336296	-3.93687	8.25518e-05	0.0193197
comp2263543_c0_seq5	215.435	-1.67928	0.426425	-3.93805	8.21457e-05	0.0193197
comp2270244_c0_seq2	126.717	-1.71656	0.436559	-3.93202	8.4236e-05	0.0195599
comp2271803_c0_seq1	196.188	-0.918971	0.234105	-3.92547	8.65617e-05	0.0199441
comp2222975_c0_seq1	27.0325	2.42295	0.618134	3.91978	8.86291e-05	0.0201087
comp2260026_c0_seq1	48.8415	-1.88236	0.480041	-3.92125	8.80903e-05	0.0201087
comp2272071_c2_seq1	437.114	-0.835664	0.213365	-3.91659	8.98115e-05	0.0202226
comp2269532_c0_seq13	3671.87	-2.11772	0.541309	-3.91222	9.14532e-05	0.0204374
comp2195994_c0_seq1	78.1373	-1.96407	0.503352	-3.90199	9.5405e-05	0.0211614
comp2237367_c0_seq1	47.3623	-1.30977	0.336168	-3.89618	9.77228e-05	0.0215149
comp2275024_c0_seq2	204.505	-0.876174	0.226243	-3.8727	0.000107635	0.023523
comp2264358_c1_seq1	319.74	-1.00589	0.259959	-3.86942	0.000109093	0.0236677
comp2268389_c0_seq1	189.39	-0.817264	0.211453	-3.86498	0.000111096	0.0239276
comp2243850_c0_seq1	42.5514	-1.47809	0.382745	-3.86182	0.000112545	0.0240653
comp2240804_c0_seq1	17.5805	-2.27575	0.589777	-3.85867	0.000114008	0.0242038
comp2278153_c0_seq4	110.362	-1.11756	0.290479	-3.8473	0.000119427	0.0251745
comp2251605_c0_seq1	694.271	-1.94507	0.506152	-3.84285	0.000121612	0.0254545
comp2276855_c0_seq1	309.949	-0.993578	0.259787	-3.82459	0.000130988	0.0272253
comp2276667_c1_seq1	65.9474	-1.63442	0.427572	-3.82256	0.000132075	0.0272607
comp2268904_c0_seq2	118.54	-1.71512	0.449164	-3.81846	0.000134286	0.0275258
comp2254643_c0_seq2	28150.4	-1.23961	0.325275	-3.81097	0.000138423	0.0279879
comp2269093_c0_seq2	46.2548	-2.05658	0.539489	-3.81208	0.000137801	0.0279879
comp1194078_c0_seq1	68.5541	1.30194	0.341949	3.80741	0.000140432	0.0281044
comp2271113_c0_seq5	1224.16	-1.56215	0.410381	-3.8066	0.000140891	0.0281044
comp2257713_c0_seq1	261.426	-1.07132	0.281883	-3.80057	0.000144366	0.0286057
comp2264837_c1_seq1	48.7321	2.23557	0.590121	3.78832	0.000151668	0.0298536
comp2229224_c0_seq1	32.4772	1.58267	0.419271	3.77482	0.000160124	0.031106
comp2268102_c0_seq5	46.4581	-1.39781	0.37022	-3.77563	0.000159601	0.031106
comp2276181_c0_seq4	228.078	-1.20212	0.318739	-3.77147	0.000162286	0.0313212
comp2268154_c0_seq1	21.4627	-2.20606	0.586117	-3.76386	0.000167308	0.0320821
comp2264836_c0_seq3	33.8917	2.09334	0.557169	3.7571	0.000171894	0.0327502
comp2273570_c0_seq3	279.146	-0.699791	0.186419	-3.75386	0.00017413	0.0329649
comp2277933_c1_seq7	8481.94	-1.26263	0.336627	-3.75081	0.000176261	0.0331571
comp2262980_c0_seq1	356.299	-1.92018	0.512927	-3.74357	0.000181423	0.0339135
comp2254419_c0_seq1	587.337	-1.04859	0.28091	-3.73283	0.000189341	0.0347098
comp2254641_c1_seq1	806.385	-1.44483	0.387436	-3.7292	0.00019209	0.0347098
comp2256492_c0_seq2	49.3838	-1.11725	0.299776	-3.72695	0.000193814	0.0347098
comp2259529_c0_seq1	2072.67	-1.37771	0.368969	-3.73394	0.000188505	0.0347098
comp2267592_c0_seq1	271.225	-1.22594	0.328673	-3.72996	0.000191508	0.0347098
comp2273229_c0_seq1	199.543	-0.899514	0.241358	-3.72689	0.000193857	0.0347098
comp2278108_c1_seq1	5064.66	-1.46224	0.392087	-3.72938	0.000191954	0.0347098
comp2269320_c0_seq3	99.4656	-1.43822	0.386102	-3.72498	0.000195332	0.0347644
comp2261423_c0_seq7	148.044	-1.23844	0.332956	-3.71953	0.000199598	0.0353122
comp2251338_c0_seq8	151.069	-1.1637	0.313092	-3.7168	0.000201759	0.0354834
comp2195212_c0_seq1	36.7336	-2.00937	0.542238	-3.7057	0.000210806	0.0368471
comp2263897_c0_seq7	442.299	2.19029	0.591293	3.70424	0.000212023	0.0368471
comp2268249_c0_seq4	92.3145	1.78228	0.481332	3.7028	0.000213233	0.0368471
comp1838578_c0_seq1	42228.3	-1.80752	0.488442	-3.70058	0.000215109	0.0369565
comp2263225_c0_seq10	80.5631	1.57864	0.426787	3.6989	0.000216539	0.0369596
comp2273141_c0_seq2	22631.3	-0.929338	0.251333	-3.69764	0.000217614	0.0369596
comp2264442_c1_seq1_contamination	93.2011	2.30275	0.623805	3.69145	0.000222977	0.0370242
comp2268617_c0_seq8	119.996	-1.42017	0.384602	-3.69256	0.000222008	0.0370242
comp2275560_c0_seq10	241.396	-0.981074	0.265664	-3.69291	0.000221698	0.0370242
comp2275820_c0_seq6	987.722	-1.02381	0.277236	-3.69292	0.00022169	0.0370242
comp2269662_c0_seq8	18757.1	-1.29906	0.352085	-3.68962	0.000224593	0.0370853
comp2272423_c0_seq3	55.3152	-1.74091	0.472043	-3.68803	0.000225999	0.0371113
comp2245947_c0_seq1	39.5138	-2.17398	0.589886	-3.68542	0.000228329	0.0372879
comp2266374_c0_seq1	256.736	-1.72743	0.469735	-3.67746	0.000235566	0.03823
comp2273721_c0_seq12	213.083	-1.03478	0.28158	-3.67488	0.000237957	0.03823
comp2274417_c0_seq2	1798.21	-1.45115	0.39483	-3.67539	0.000237487	0.03823
comp2254167_c0_seq1	2540.91	-1.77577	0.484112	-3.6681	0.000244357	0.0386317
comp2261740_c0_seq2	25.2271	-1.31213	0.357548	-3.6698	0.000242742	0.0386317
comp2265878_c0_seq2	257.952	-1.37333	0.374387	-3.66822	0.000244247	0.0386317
comp2274290_c0_seq2	60.0034	-1.53627	0.419126	-3.66541	0.000246942	0.0388339
comp1975390_c0_seq1	237.194	-1.34356	0.36727	-3.65823	0.000253965	0.0397281
comp2130150_c0_seq1	16.4879	-1.48328	0.405996	-3.65343	0.000258764	0.0402669
comp2261804_c0_seq1	15.7141	-2.35545	0.645021	-3.65174	0.000260473	0.0403218
comp2226860_c0_seq1	27.5895	-2.10711	0.578622	-3.6416	0.000270951	0.0417265
comp2266735_c0_seq5	296.814	-1.23946	0.340857	-3.63631	0.000276574	0.0420716
comp2268784_c1_seq20	7047.21	-1.12129	0.308327	-3.63669	0.000276169	0.0420716
comp2271575_c0_seq13	748.486	-1.39103	0.382624	-3.6355	0.000277438	0.0420716
comp2259573_c0_seq1	444.659	1.8437	0.5077	3.63149	0.000281792	0.0425148
comp2216604_c0_seq2	20.6216	2.41855	0.666257	3.63005	0.000283361	0.0425357
gnl|Pdu_trscr_assembly_1|12794	12373.2	-0.894113	0.246639	-3.62519	0.000288752	0.0431271
comp2265939_c0_seq4	109.95	-1.0838	0.299409	-3.6198	0.000294828	0.0433923
comp2269593_c0_seq3	850.332	-1.27516	0.352281	-3.61973	0.000294908	0.0433923
comp2270281_c0_seq1	142.63	-0.950719	0.262628	-3.62002	0.000294586	0.0433923
comp2214237_c0_seq1	130.225	-1.58119	0.43782	-3.61151	0.000304421	0.0441366
comp2243922_c0_seq1	30.3471	-1.63808	0.453314	-3.61357	0.000302007	0.0441366
comp2267132_c0_seq2	71.0614	-1.47428	0.408201	-3.61165	0.000304256	0.0441366
comp2269996_c0_seq1	194.479	-1.49359	0.413765	-3.60976	0.000306486	0.0442202
comp2272093_c0_seq1	1250.48	-1.03641	0.287397	-3.60618	0.000310743	0.0446179
comp2240664_c0_seq1	338.812	-1.69945	0.471785	-3.60217	0.000315566	0.0448768
comp2251960_c0_seq1	24.0298	1.88214	0.522405	3.60284	0.000314765	0.0448768
comp2239040_c0_seq1	116.282	-1.01984	0.283411	-3.59846	0.000320103	0.0450905
comp2265663_c1_seq31	3679.96	-1.2611	0.350365	-3.59937	0.000318985	0.0450905
comp2199471_c0_seq1	174.828	0.828003	0.230615	3.59041	0.000330156	0.0452531
comp2263914_c0_seq1	418.994	-1.45376	0.40438	-3.59502	0.000324364	0.0452531
comp2264627_c0_seq5	15.4201	-1.73272	0.482445	-3.59153	0.000328742	0.0452531
comp2267765_c0_seq1	2292.48	-1.58914	0.442402	-3.59208	0.000328051	0.0452531
comp2272774_c0_seq2	72.3239	-1.53057	0.426315	-3.59023	0.000330392	0.0452531
comp2277981_c0_seq1	2406.34	-1.40558	0.391481	-3.59042	0.000330148	0.0452531
comp2263128_c0_seq1	57.2094	-1.25279	0.349462	-3.5849	0.000337204	0.0459743
comp2138612_c0_seq1	262.063	-1.58144	0.441793	-3.5796	0.000344117	0.0467025
comp2270697_c1_seq1	72.4179	-1.4244	0.398582	-3.57367	0.000352019	0.0475578
comp2242445_c0_seq1	18.686	-2.10055	0.588517	-3.56922	0.000358045	0.0478366
comp2242477_c0_seq1	85.2816	-1.19721	0.335322	-3.57033	0.00035653	0.0478366
comp2259724_c1_seq6	222.009	-0.963768	0.27007	-3.56859	0.000358911	0.0478366
comp2265229_c0_seq2	394.566	-1.64736	0.461886	-3.56659	0.000361656	0.0478456
comp2269413_c0_seq1	549.504	-1.31838	0.369744	-3.56565	0.00036295	0.0478456
comp2270228_c0_seq1	1313.05	-1.3923	0.390574	-3.56474	0.000364211	0.0478456
comp2276940_c0_seq2	1605.65	-1.4926	0.418814	-3.56388	0.000365418	0.0478456
comp2263068_c0_seq1	35.6786	-1.25509	0.352348	-3.56207	0.000367946	0.0479653
comp2275037_c1_seq2	44.0557	-1.62066	0.455288	-3.55964	0.000371368	0.0479904
comp2275062_c0_seq4	83.3403	-1.05957	0.297624	-3.56008	0.000370739	0.0479904
comp2235779_c0_seq1	66.6651	-1.78388	0.50152	-3.55695	0.000375192	0.0480666
comp2273595_c0_seq1	1009.88	-1.53366	0.431039	-3.55804	0.000373631	0.0480666
comp2219123_c0_seq1	15.7515	-1.75285	0.494593	-3.54402	0.000394077	0.0496303
comp2270901_c0_seq1	43.9221	1.60859	0.453873	3.54414	0.000393897	0.0496303
comp2273230_c0_seq2	383.727	1.15409	0.325487	3.54575	0.0003915	0.0496303
comp2276961_c0_seq17	462.081	-1.32412	0.373284	-3.54723	0.000389311	0.0496303
comp2277608_c0_seq2	150.489	-0.840697	0.237325	-3.54238	0.000396532	0.0497288
comp2276603_c2_seq11	2488.03	-1.61823	0.456966	-3.54124	0.000398249	0.0497343
comp2258178_c0_seq3	85.8895	-1.91135	0.540371	-3.53711	0.000404538	0.0503083
comp2240307_c0_seq1	89.0501	-1.06896	0.302942	-3.52859	0.000417777	0.0517381
comp2205967_c0_seq2	43.2386	2.08185	0.590205	3.52734	0.000419755	0.0517675
comp2277832_c2_seq4	137.505	-1.27451	0.361512	-3.5255	0.000422691	0.0519142
comp2266448_c1_seq3	1022.78	-1.76923	0.503292	-3.5153	0.00043925	0.0537259
comp2269037_c0_seq5	62.0814	1.65586	0.471521	3.51175	0.000445162	0.0540046
comp2270119_c0_seq15	1179.56	-1.41607	0.403187	-3.5122	0.000444421	0.0540046
comp2278583_c0_seq1	687.895	-0.788791	0.224703	-3.51038	0.000447473	0.0540642
comp2272507_c0_seq3	573.896	-1.70241	0.486026	-3.50271	0.000460546	0.0554185
comp2272226_c1_seq1	108.303	1.35191	0.386287	3.49975	0.000465692	0.0558117
comp2277430_c0_seq5	198.748	1.26964	0.363627	3.49161	0.000480122	0.05731
comp2198797_c0_seq2	29.7566	-1.63092	0.467356	-3.48968	0.000483594	0.0574935
comp2138099_c0_seq1	445.94	-1.60708	0.460698	-3.48835	0.000486004	0.0575499
comp2245053_c0_seq1	141.305	-1.36181	0.390638	-3.48611	0.000490098	0.0578043
comp2278501_c0_seq5	2403.03	-1.13688	0.326374	-3.48336	0.000495154	0.0581698
comp2270569_c0_seq1	411.755	-0.819958	0.235599	-3.48031	0.000500835	0.0586056
gnl|Pdu_trscr_assembly_1|14372	199.11	-1.49544	0.429868	-3.47883	0.000503601	0.0586981
comp2271844_c0_seq1	6439.56	-1.02554	0.295047	-3.47586	0.000509223	0.0588916
comp2277022_c0_seq15	305.89	-1.29515	0.37255	-3.47645	0.0005081	0.0588916
comp2254457_c0_seq7	168.17	-1.81931	0.523734	-3.47372	0.00051329	0.0591318
comp2278002_c0_seq15	2265.35	-0.71057	0.204683	-3.47157	0.000517431	0.0593788
comp2274713_c1_seq7	1235.99	-1.44976	0.417825	-3.46978	0.000520894	0.0595462
comp2257559_c1_seq2	84.7991	-1.70027	0.490598	-3.4657	0.000528856	0.0600094
comp2269873_c1_seq1	541.257	-2.12935	0.614418	-3.46563	0.000528984	0.0600094
gnl|Pdu_trscr_assembly_1|334642	51.8067	-1.45127	0.41971	-3.4578	0.000544602	0.0600979
comp2245274_c0_seq1	22.6923	-1.5801	0.456746	-3.45947	0.00054123	0.0600979
comp2258616_c0_seq1	275.365	-1.33973	0.38722	-3.45985	0.000540467	0.0600979
comp2263452_c3_seq3	251.49	-0.832911	0.240887	-3.45769	0.000544832	0.0600979
comp2266525_c1_seq2	60.2198	-1.408	0.406964	-3.45976	0.000540647	0.0600979
comp2267155_c0_seq2	659.422	-1.10643	0.319493	-3.46308	0.000534022	0.0600979
comp2268723_c0_seq3	31.0136	-1.39627	0.403881	-3.45714	0.00054594	0.0600979
comp2278157_c1_seq1	211.381	-0.835429	0.241616	-3.45767	0.000544871	0.0600979
gnl|Pdu_trscr_assembly_1|14840	159.863	1.2891	0.373377	3.45255	0.000555316	0.0606116
comp2221095_c0_seq1	571.552	-1.84203	0.533634	-3.45187	0.000556724	0.0606116
comp2267005_c0_seq1	141.312	-1.84359	0.533949	-3.45275	0.00055491	0.0606116
comp2234148_c0_seq2	24.5388	-1.27886	0.370767	-3.44923	0.00056219	0.0609832
comp2268857_c0_seq2	3204.31	-1.7331	0.502903	-3.4462	0.000568528	0.0614465
comp2272079_c0_seq3	221.532	-1.00542	0.292161	-3.44131	0.000578902	0.062341
comp2277104_c0_seq3	2529.52	-1.14841	0.334059	-3.43776	0.000586557	0.0629374
comp2262136_c0_seq3	431.838	-0.532855	0.15511	-3.43535	0.0005918	0.0632715
comp2272572_c0_seq1	292.194	-0.906236	0.264097	-3.43145	0.000600361	0.0639567
comp2273855_c0_seq5	121.377	-1.14774	0.335828	-3.41764	0.000631662	0.0670509
comp2241498_c0_seq2	133.693	-1.73439	0.507745	-3.41587	0.000635779	0.0672478
comp2264442_c0_seq1_contamination	412.916	2.06671	0.606145	3.40959	0.000650602	0.0685025
comp2275067_c0_seq2	1639.27	-1.3339	0.391299	-3.4089	0.000652251	0.0685025
comp2271448_c0_seq1	128.911	-1.83395	0.538357	-3.40658	0.000657832	0.0688453
comp2242540_c0_seq1	17.9148	1.38209	0.406277	3.40184	0.000669338	0.0695597
comp2251523_c0_seq1	159.51	-1.69242	0.497451	-3.40218	0.000668508	0.0695597
gnl|Pdu_trscr_assembly_1|5769	337.146	0.894615	0.263072	3.40064	0.000672277	0.0696217
comp2210440_c0_seq1_contamination	17.8759	1.59309	0.469377	3.39404	0.000688686	0.0710733
comp2277335_c1_seq5	725.924	0.985431	0.29043	3.393	0.000691305	0.0710967
comp2272854_c1_seq5	42.2743	-1.52357	0.449229	-3.39153	0.000695026	0.0712329
comp2253182_c0_seq1_contamination	331.163	2.10475	0.621467	3.38674	0.000707282	0.07224
comp2037149_c0_seq1	1049.1	-1.65978	0.490428	-3.38436	0.000713449	0.0726203
comp2269771_c0_seq5	79.6447	-1.36213	0.403008	-3.3799	0.000725125	0.0735569
gnl|Pdu_trscr_assembly_1|263843	180.276	-1.46894	0.436655	-3.36407	0.000768021	0.0775116
comp2264745_c0_seq4	185.174	-0.918878	0.273183	-3.3636	0.000769326	0.0775116
comp2270797_c0_seq10	2038.78	-0.927351	0.275797	-3.36244	0.000772556	0.077574
comp2273646_c2_seq2	668.334	-1.59241	0.474487	-3.35606	0.000790608	0.0791193
comp2259270_c0_seq5	44.8303	-1.46477	0.436823	-3.35325	0.000798697	0.0796606
comp2254913_c0_seq2	27.9942	-1.69176	0.504664	-3.35225	0.000801573	0.0796801
comp1908160_c0_seq1	21.7271	-1.19842	0.35797	-3.34781	0.000814519	0.0796904
comp2259222_c0_seq1	42.1979	-0.952044	0.284222	-3.34965	0.000809143	0.0796904
comp2261210_c0_seq3	55.6928	-1.15001	0.343458	-3.34833	0.000813007	0.0796904
gnl|Pdu_trscr_assembly_1|1043	998.238	-1.18068	0.352693	-3.34762	0.000815083	0.0796904
comp2273846_c1_seq2	166.721	-1.51424	0.452137	-3.34907	0.000810839	0.0796904
comp2254544_c0_seq2	87.8471	-1.68517	0.503635	-3.34603	0.000819784	0.0798873
comp2276908_c0_seq5	3055.82	-1.02762	0.307254	-3.34454	0.000824188	0.0799689
comp2278120_c0_seq8	198.185	-1.43694	0.429715	-3.34393	0.000826003	0.0799689
comp2198732_c0_seq2	82.5339	-1.50433	0.450707	-3.33771	0.000844723	0.0813986
comp2274581_c1_seq6	1268.68	-0.828797	0.24835	-3.33721	0.000846247	0.0813986
comp2273738_c0_seq7	40.3712	-2.01137	0.602893	-3.3362	0.00084931	0.0814297
comp2261767_c1_seq3	34.2997	-1.5648	0.469289	-3.33441	0.000854815	0.0815109
comp2271886_c1_seq1	21.6425	1.12414	0.337161	3.33414	0.000855642	0.0815109
comp2266421_c1_seq2	21.4566	-1.7322	0.5199	-3.3318	0.000862874	0.0819372
comp2272162_c0_seq1	27.4296	-1.37977	0.414243	-3.33082	0.000865908	0.0819634
comp2267356_c1_seq8	369.61	-1.05565	0.317219	-3.32781	0.000875304	0.0825898
comp2267023_c0_seq6	245.892	2.04074	0.613748	3.32504	0.000884059	0.0829875
comp2269459_c0_seq2	668.243	-1.40053	0.421326	-3.32409	0.000887061	0.0829875
comp2270799_c1_seq1	97.7911	-1.45179	0.436803	-3.32367	0.000888424	0.0829875
comp2273756_c0_seq1	77.6526	-1.2235	0.368195	-3.32296	0.000890687	0.0829875
comp2274429_c0_seq1	2096.31	-1.29286	0.389322	-3.32081	0.000897562	0.0833667
comp2275240_c0_seq5	76.3438	2.05079	0.618015	3.31835	0.000905501	0.0838421
comp2273886_c0_seq13	403.61	-1.16885	0.352366	-3.31714	0.000909456	0.0839468
comp2267421_c0_seq1	213.403	-0.913567	0.275717	-3.31343	0.000921602	0.0845428
comp2276033_c0_seq1	298.918	-0.748155	0.225743	-3.3142	0.00091907	0.0845428
comp2268048_c0_seq16	158.114	1.45366	0.43914	3.31024	0.000932161	0.0852483
comp2252269_c1_seq2	51.4855	0.993883	0.300507	3.30735	0.000941824	0.0856051
comp2271448_c1_seq3	249.46	-1.33315	0.403006	-3.30801	0.000939617	0.0856051
comp2209411_c0_seq2	95.2092	-1.75922	0.532272	-3.30512	0.00094935	0.0857647
comp2274862_c1_seq2	1108.86	-1.10272	0.333556	-3.30596	0.000946507	0.0857647
gnl|Pdu_trscr_assembly_1|994	261.173	0.902229	0.273077	3.30393	0.000953394	0.085869
comp2248955_c0_seq1	73.1604	-2.06856	0.626934	-3.29948	0.000968638	0.0867499
comp2274026_c0_seq7	326.818	-1.0918	0.330912	-3.29937	0.000969011	0.0867499
comp2252994_c0_seq2	42.4379	-1.53804	0.466366	-3.29792	0.000974022	0.0869366
comp2278218_c0_seq1	2337.86	-1.19172	0.361636	-3.29535	0.000982975	0.087473
comp2266256_c0_seq34	757.194	-1.17828	0.35799	-3.29138	0.000996974	0.088454
comp2266994_c0_seq4	310.275	-0.917596	0.278962	-3.28932	0.0010043	0.0888389
comp2265010_c0_seq3	80.7053	1.12995	0.344095	3.28384	0.00102403	0.0902947
comp2272452_c0_seq2	22.6565	-1.55362	0.473223	-3.28307	0.00102684	0.0902947
comp2274985_c0_seq18	86.2043	-1.30937	0.398973	-3.28185	0.00103127	0.0904172
comp1894136_c0_seq2	31.9673	2.26489	0.690607	3.27956	0.00103971	0.0908888
comp2267687_c0_seq2	72.7602	-1.22637	0.374319	-3.27626	0.0010519	0.091122
comp2270237_c0_seq1	725.591	-1.65905	0.506528	-3.27534	0.00105535	0.091122
comp2274320_c0_seq2	156.198	0.699048	0.213255	3.27799	0.0010455	0.091122
comp2274485_c1_seq1	180.968	-1.07458	0.328059	-3.27557	0.0010545	0.091122
comp2277568_c0_seq5	127.424	-1.75702	0.536541	-3.27471	0.0010577	0.091122
comp2277150_c1_seq4	1886.82	-1.2955	0.39611	-3.27055	0.00107339	0.0922062
comp2244287_c0_seq2	47.8407	1.56177	0.477734	3.26912	0.00107881	0.0924049
comp2242307_c0_seq1	35.8591	-1.59856	0.489946	-3.26272	0.00110348	0.0942429
comp2263957_c0_seq7	331.938	-0.677756	0.20783	-3.26111	0.00110978	0.0942429
comp2267341_c0_seq1	2739.44	-0.905883	0.277725	-3.2618	0.00110708	0.0942429
comp2262142_c0_seq2	1636.33	-1.63811	0.502521	-3.25979	0.00111496	0.0944127
comp2271011_c0_seq1	163.285	-0.878369	0.269704	-3.25679	0.00112678	0.094873
comp2272495_c0_seq1	3738.7	-0.912304	0.280103	-3.25703	0.00112586	0.094873
comp2245713_c0_seq1	67.1261	-1.2813	0.393596	-3.25536	0.00113249	0.0950848
comp2277271_c0_seq4	250.644	1.11248	0.34208	3.25209	0.00114558	0.0956433
comp2278479_c1_seq28	11063.1	-1.11025	0.341342	-3.2526	0.00114354	0.0956433
comp1194334_c0_seq1	1465.1	-1.04448	0.321589	-3.24787	0.00116273	0.0964989
comp2243423_c0_seq1	169.23	0.80591	0.24849	3.24324	0.0011818	0.0964989
gnl|Pdu_trscr_assembly_1|13757	354.92	-0.781614	0.240847	-3.24527	0.00117339	0.0964989
comp2261800_c0_seq2	43.0212	-1.15659	0.356572	-3.24362	0.0011802	0.0964989
comp2266135_c0_seq1	742.544	-0.966321	0.297507	-3.24807	0.00116193	0.0964989
comp2268206_c0_seq1_contamination	399.475	1.93965	0.59771	3.24513	0.00117396	0.0964989
comp2270736_c0_seq3	34.3482	1.25358	0.386271	3.24533	0.00117316	0.0964989
comp2271145_c0_seq1	114.888	-1.69601	0.522861	-3.24371	0.00117982	0.0964989
comp2265558_c0_seq2	117.15	-1.8983	0.585485	-3.24226	0.00118586	0.0965651
comp2252589_c0_seq1	82.7435	-0.884255	0.272864	-3.24064	0.0011926	0.0968479
comp2261362_c0_seq2	1055.96	-1.41034	0.435381	-3.23933	0.00119809	0.0970291
comp2237963_c0_seq1	53.5839	-1.4016	0.433053	-3.23655	0.00120984	0.0977144
comp2246102_c0_seq1	87.185	-1.41835	0.438768	-3.23258	0.00122677	0.098498
comp2251943_c0_seq1	85.8053	-1.76921	0.547413	-3.23195	0.00122948	0.098498
comp2259570_c0_seq1	218.557	-1.1994	0.371099	-3.23201	0.00122921	0.098498
comp2239113_c0_seq1	29.9923	1.03101	0.319341	3.22855	0.00124421	0.0986145
gnl|Pdu_trscr_assembly_1|20006	29.7688	1.99993	0.61905	3.23065	0.00123509	0.0986145
comp2253854_c0_seq1	54.0382	-1.25035	0.387205	-3.22917	0.00124152	0.0986145
comp2274401_c0_seq11	363.464	-0.639588	0.198069	-3.22913	0.00124169	0.0986145
comp2256706_c0_seq3	17.5032	-1.39934	0.433579	-3.22742	0.0012491	0.0986186
comp2272815_c1_seq14	265.708	-0.724535	0.224573	-3.22628	0.0012541	0.0986186
comp2274999_c0_seq4	3817.87	-1.39435	0.432188	-3.22625	0.00125422	0.0986186
comp2250815_c0_seq1	16.9611	-1.77542	0.550917	-3.22267	0.00127	0.0993343
comp2254638_c0_seq1	80.1709	-1.1996	0.372165	-3.2233	0.00126723	0.0993343
comp2270115_c0_seq5	76.7042	-0.8835	0.274261	-3.22138	0.00127574	0.0994063
comp2277510_c2_seq1	1006.2	-1.40961	0.437637	-3.22096	0.00127761	0.0994063

## Sheet: IM_NM vs M_NM_Female
	baseMean	log2FoldChange	lfcSE	stat	pvalue	padj
comp2269662_c0_seq8	18757.1	-8.52293	0.350194	-24.3377	7.82362e-131	2.79577e-126
comp2257567_c0_seq1	2601.19	-7.51353	0.341087	-22.0282	1.54692e-107	2.76396e-103
comp2256337_c0_seq2	359.485	-7.05345	0.408605	-17.2623	9.04995e-67	1.078e-62
comp2234324_c0_seq2	4423.94	-9.94991	0.577882	-17.2179	1.94962e-66	1.74174e-62
comp2265263_c0_seq1	3439.88	-7.0225	0.409636	-17.1433	7.05427e-66	5.04169e-62
comp2265751_c0_seq4	462.568	-7.50166	0.447027	-16.7812	3.34759e-63	1.99377e-59
comp2236959_c0_seq1	1122.83	-6.62714	0.41323	-16.0374	7.00167e-58	3.57435e-54
comp2265326_c0_seq3	5903.1	6.93836	0.43439	15.9727	1.98168e-57	8.85192e-54
comp2272108_c0_seq1	2995.14	-5.2533	0.343176	-15.3079	6.77131e-53	2.68859e-49
comp2254792_c1_seq4	10946.5	-8.40043	0.552724	-15.1982	3.63253e-52	1.29809e-48
comp2253014_c0_seq2	7025.59	-2.27584	0.150688	-15.1029	1.54865e-51	5.03101e-48
comp2254414_c0_seq1	440.354	-3.53334	0.241585	-14.6257	1.92629e-48	5.73632e-45
comp2223254_c0_seq1	1776.33	-8.04832	0.550968	-14.6076	2.51251e-48	6.90649e-45
comp2271537_c0_seq19	1250.25	-4.18786	0.290142	-14.4338	3.17123e-47	7.55493e-44
isotig10568	3256.76	6.9502	0.481504	14.4344	3.14557e-47	7.55493e-44
comp2262279_c0_seq1	11965.3	-8.29776	0.579824	-14.3108	1.87305e-46	4.18334e-43
comp2257715_c1_seq3	2503.48	-4.77544	0.333936	-14.3005	2.17294e-46	4.56765e-43
comp2224089_c0_seq1	660.552	-4.9549	0.349126	-14.1923	1.02257e-45	2.03009e-42
comp2258675_c0_seq3	527.406	-4.70517	0.334118	-14.0824	4.87537e-45	9.16954e-42
comp2261608_c0_seq1	3608.59	-7.27375	0.526122	-13.8252	1.79555e-43	3.2082e-40
comp2275713_c0_seq3	26150.7	-5.32738	0.388595	-13.7093	8.92646e-43	1.51899e-39
comp2242933_c0_seq1	26670.4	-5.67718	0.415215	-13.6729	1.47482e-42	2.39557e-39
comp2215885_c0_seq1	296.876	-7.77523	0.569825	-13.645	2.16343e-42	3.36131e-39
comp2205302_c0_seq1	523.253	-4.53399	0.333297	-13.6035	3.81945e-42	5.68701e-39
gnl|Pdu_trscr_assembly_1|1218	398.855	-3.04807	0.226762	-13.4417	3.44226e-41	4.92036e-38
comp2256041_c0_seq1	33311.8	-3.44396	0.257077	-13.3966	6.32968e-41	8.69966e-38
comp2270003_c1_seq1	142.269	-5.82523	0.435132	-13.3873	7.1759e-41	9.49744e-38
comp2262443_c0_seq1	4613.05	-4.81625	0.360274	-13.3683	9.26395e-41	1.18231e-37
comp2240916_c0_seq1	1065.28	5.34512	0.402689	13.2736	3.29416e-40	4.0592e-37
comp1193006_c0_seq1	80.4783	-6.65925	0.502384	-13.2553	4.20471e-40	5.00852e-37
comp2272119_c0_seq6	321.046	-4.55281	0.34697	-13.1216	2.47534e-39	2.85342e-36
comp2244589_c0_seq2	6458.2	-6.00073	0.460019	-13.0445	6.82851e-39	7.62552e-36
comp2253801_c0_seq1	484.526	-5.65421	0.442589	-12.7753	2.25218e-37	2.43884e-34
comp2261980_c0_seq3	6477.25	5.8504	0.464321	12.5999	2.11414e-36	2.22202e-33
comp2272698_c0_seq4	4611.09	-3.32828	0.265161	-12.5519	3.87976e-36	3.96124e-33
comp2250225_c0_seq2	4722.82	-4.9384	0.395228	-12.4951	7.9427e-36	7.88423e-33
comp2270003_c0_seq1	308.474	-6.19304	0.497988	-12.4361	1.66355e-35	1.60667e-32
comp2273601_c1_seq1	263.573	-4.48448	0.361554	-12.4034	2.50579e-35	2.35644e-32
comp2271249_c0_seq23	1879.11	-5.82237	0.470475	-12.3755	3.54536e-35	3.24855e-32
comp2272370_c0_seq4	521.22	-3.38367	0.277615	-12.1883	3.58694e-34	3.20449e-31
comp2261876_c0_seq1	1236.94	4.12531	0.340447	12.1173	8.54953e-34	7.45165e-31
comp2261851_c1_seq1	1383.24	4.58552	0.380145	12.0626	1.66534e-33	1.41692e-30
comp2221300_c0_seq1	154.58	-4.53594	0.379592	-11.9495	6.53036e-33	5.42704e-30
comp2273459_c1_seq1	174.928	-4.9349	0.415163	-11.8867	1.38847e-32	1.12766e-29
comp2274137_c0_seq1	4991.52	4.79946	0.408152	11.759	6.34876e-32	5.04162e-29
comp2276073_c1_seq1	583.658	-5.48041	0.467289	-11.7281	9.14896e-32	7.10735e-29
comp1194608_c0_seq1	1093.33	-4.10023	0.352055	-11.6466	2.38924e-31	1.81658e-28
comp2267304_c0_seq3	1248.01	-4.30819	0.372945	-11.5518	7.22867e-31	5.38159e-28
comp2262137_c0_seq3	731.127	5.67197	0.49125	11.546	7.73306e-31	5.63961e-28
comp2232271_c0_seq1	221.162	-5.30437	0.463812	-11.4365	2.7486e-30	1.96442e-27
comp2276073_c0_seq1	181.606	-5.27655	0.463089	-11.3942	4.46747e-30	3.1303e-27
comp2269146_c0_seq1	28359.9	-2.77995	0.244904	-11.3512	7.31642e-30	5.02793e-27
comp2272343_c0_seq3	910.497	4.91473	0.433376	11.3406	8.2605e-30	5.5696e-27
comp2272437_c1_seq1	17038.2	4.69617	0.414618	11.3265	9.69856e-30	6.41811e-27
comp2266373_c0_seq1	161.065	-3.80055	0.335709	-11.321	1.03307e-29	6.71215e-27
comp2267875_c0_seq5	1551.16	-2.78777	0.246797	-11.2958	1.37692e-29	8.7865e-27
comp2255923_c0_seq3	535.151	-5.19438	0.46052	-11.2794	1.65902e-29	1.04009e-26
comp2253407_c0_seq3	13532.6	5.21116	0.464355	11.2224	3.16698e-29	1.95124e-26
comp2272379_c0_seq9	3099.63	-4.52028	0.403108	-11.2136	3.49746e-29	2.11833e-26
comp2280824_c0_seq1	1593.78	-3.70977	0.33095	-11.2095	3.66321e-29	2.18175e-26
comp2273152_c0_seq2	1460.17	-2.80399	0.250566	-11.1906	4.53359e-29	2.65587e-26
comp2209056_c0_seq1	404.939	-6.9412	0.622649	-11.1478	7.33579e-29	4.22813e-26
comp2235052_c0_seq1	502.802	-6.37232	0.574221	-11.0973	1.29262e-28	7.332e-26
comp2268687_c0_seq1	3902.01	-5.60717	0.505419	-11.0941	1.34004e-28	7.48222e-26
comp2273459_c0_seq2	626.853	-5.13411	0.467836	-10.9742	5.08682e-28	2.79658e-25
comp2268819_c2_seq1	1085.9	-5.54959	0.506201	-10.9632	5.74145e-28	3.10865e-25
comp2252195_c0_seq1	638.469	-5.37504	0.494429	-10.8712	1.58096e-27	8.43219e-25
comp2229575_c0_seq1	1319.3	1.7117	0.157573	10.8629	1.73103e-27	9.09682e-25
comp2282195_c0_seq2	4525.83	-3.72288	0.342935	-10.8559	1.86899e-27	9.67946e-25
comp2256943_c0_seq2	58.1874	-4.81462	0.446847	-10.7746	4.5357e-27	2.31547e-24
comp2260095_c1_seq1	100.225	-4.77626	0.443354	-10.773	4.61565e-27	2.3231e-24
gnl|Pdu_trscr_assembly_1|1213	28496.3	-4.20475	0.390703	-10.762	5.20089e-27	2.5813e-24
comp2239858_c0_seq1	1186.69	-4.67042	0.434218	-10.7559	5.55603e-27	2.71979e-24
comp2264636_c0_seq1	925.109	2.07629	0.193269	10.743	6.39097e-27	3.08624e-24
comp2267655_c0_seq21	7639.54	-4.14465	0.390582	-10.6115	2.63566e-26	1.2558e-23
comp2275741_c0_seq1	4437.22	-2.82166	0.266711	-10.5795	3.71033e-26	1.74459e-23
comp2264786_c0_seq1	363.582	-3.62995	0.343792	-10.5586	4.63744e-26	2.1522e-23
comp2238682_c0_seq2	241.692	-5.81114	0.552911	-10.5101	7.76224e-26	3.5562e-23
comp2269108_c0_seq5	88.62	-3.19581	0.304347	-10.5005	8.58802e-26	3.88472e-23
comp2267592_c0_seq1	271.225	-3.48042	0.331551	-10.4974	8.88143e-26	3.96723e-23
comp2269234_c0_seq4	193.379	4.04182	0.385334	10.4891	9.69223e-26	4.27595e-23
comp2278392_c0_seq1	1817.81	-3.55937	0.342133	-10.4035	2.39086e-25	1.04192e-22
comp2270387_c0_seq54	1285.89	-2.40199	0.231854	-10.3599	3.772e-25	1.624e-22
comp2202652_c0_seq2	424.192	-4.50356	0.436741	-10.3117	6.23605e-25	2.65292e-22
comp2278475_c0_seq14	3679.02	-2.02531	0.19707	-10.2771	8.93787e-25	3.75759e-22
comp2276257_c0_seq6	560.819	-2.78094	0.271027	-10.2607	1.05907e-24	4.4007e-22
comp2254367_c0_seq1	565.227	2.80382	0.273435	10.2541	1.13464e-24	4.6605e-22
comp2260003_c0_seq1	148.637	-4.55525	0.44646	-10.203	1.92182e-24	7.80411e-22
comp2272093_c0_seq1	1250.48	3.32965	0.327549	10.1654	2.83079e-24	1.13274e-21
comp2274563_c1_seq9	767.181	-2.7999	0.275456	-10.1646	2.85285e-24	1.13274e-21
comp2276390_c2_seq3	2706.74	-2.80816	0.276568	-10.1536	3.19425e-24	1.25436e-21
comp2234282_c0_seq1	2181.91	-3.99323	0.394789	-10.1148	4.74749e-24	1.84404e-21
comp2272553_c0_seq5	855.956	3.26201	0.32304	10.0979	5.64645e-24	2.16963e-21
comp2271713_c0_seq1	2437.78	4.58755	0.454489	10.0939	5.88076e-24	2.23563e-21
comp2263738_c0_seq2	1015.53	-1.80852	0.179545	-10.0728	7.29098e-24	2.74256e-21
comp2263706_c0_seq2	71.4057	-4.56324	0.453333	-10.066	7.81112e-24	2.90761e-21
comp2272249_c0_seq2	350.769	-3.38651	0.336808	-10.0547	8.75707e-24	3.22612e-21
comp2248955_c0_seq1	73.1604	-6.25026	0.622028	-10.0482	9.35502e-24	3.41124e-21
comp2261415_c0_seq1	190.883	-3.31787	0.330266	-10.0461	9.56058e-24	3.45098e-21
gnl|Pdu_trscr_assembly_1|200732	11378.9	4.47846	0.446175	10.0375	1.04323e-23	3.72798e-21
comp2259403_c0_seq2	494.958	4.52194	0.450557	10.0363	1.05525e-23	3.73359e-21
comp2263873_c0_seq9	1607.79	4.33137	0.43188	10.0291	1.1354e-23	3.9778e-21
comp2138076_c0_seq1	607.959	-4.34324	0.434087	-10.0054	1.44239e-23	5.00425e-21
comp2269247_c0_seq1	4332.18	-3.09708	0.310242	-9.98281	1.81267e-23	6.22842e-21
comp2275743_c0_seq2	3431.66	-2.89471	0.290039	-9.98041	1.85702e-23	6.32005e-21
comp2273207_c0_seq5	904.488	-3.55628	0.357143	-9.9576	2.33633e-23	7.8763e-21
comp2273978_c0_seq1	1675.33	-3.73246	0.375486	-9.94036	2.77823e-23	9.2785e-21
comp2241134_c0_seq1	974.418	2.78637	0.280549	9.93184	3.02612e-23	1.00128e-20
comp2270871_c0_seq1	678.919	4.60677	0.463905	9.93041	3.0698e-23	1.00641e-20
comp2270561_c0_seq2	567.525	-3.91375	0.394856	-9.91184	3.69778e-23	1.20128e-20
comp2253317_c0_seq1	1161.86	-3.01966	0.30517	-9.895	4.37596e-23	1.40097e-20
comp2277203_c0_seq4	1689.06	-2.59868	0.262658	-9.89377	4.43011e-23	1.40097e-20
comp2278464_c0_seq2	6608.78	2.96125	0.299302	9.89387	4.4258e-23	1.40097e-20
comp2277335_c1_seq5	725.924	-2.84998	0.288917	-9.86436	5.94123e-23	1.86237e-20
comp2277584_c0_seq5	872.307	-3.67767	0.37318	-9.85494	6.5256e-23	2.02776e-20
comp1192611_c0_seq1	411.044	-3.62118	0.368428	-9.82873	8.46825e-23	2.60873e-20
comp2275270_c0_seq2	9713.57	-3.94745	0.404356	-9.76232	1.63376e-22	4.95374e-20
comp2276174_c0_seq14	706.843	-3.05132	0.312565	-9.76219	1.63577e-22	4.95374e-20
comp2252709_c0_seq3	437.359	-2.67051	0.27386	-9.75137	1.82003e-22	5.46545e-20
comp2247098_c0_seq1	732.576	4.8572	0.499264	9.72871	2.27466e-22	6.77375e-20
comp2261193_c1_seq4	83.1194	-4.37285	0.450013	-9.71715	2.54806e-22	7.5252e-20
comp2259858_c0_seq2	81.2028	-5.42194	0.558136	-9.71437	2.61871e-22	7.67046e-20
comp2274959_c0_seq5	4452.81	-3.08397	0.317518	-9.71273	2.66107e-22	7.73118e-20
comp2275350_c0_seq1	1873.65	-2.36413	0.243564	-9.70639	2.83203e-22	8.16149e-20
comp2281046_c0_seq1	263.147	4.76233	0.491176	9.69576	3.14276e-22	8.98451e-20
comp2277987_c1_seq1	3211.14	-3.53168	0.364592	-9.68664	3.43642e-22	9.74607e-20
comp2277610_c1_seq3	1815.36	-2.99158	0.309567	-9.66373	4.29905e-22	1.20966e-19
comp2270999_c0_seq5	536.949	-3.23135	0.33575	-9.62428	6.31477e-22	1.76296e-19
comp2253691_c1_seq1	3609.73	-3.06821	0.319209	-9.61194	7.11965e-22	1.97225e-19
comp2272319_c0_seq24	41850.7	-3.5265	0.366937	-9.61064	7.21003e-22	1.98193e-19
comp2277776_c0_seq1	1674.08	-3.79993	0.396442	-9.58507	9.23958e-22	2.52043e-19
comp2266185_c0_seq3	207.184	-4.96962	0.518633	-9.58215	9.50449e-22	2.57305e-19
comp2275310_c0_seq1	1222.01	-3.62935	0.379133	-9.57276	1.04085e-21	2.7966e-19
comp2272828_c0_seq8	945.451	-3.05705	0.321181	-9.51815	1.76284e-21	4.70112e-19
comp2269191_c0_seq3	427.183	-4.6318	0.487131	-9.50832	1.93769e-21	5.12914e-19
comp2266942_c0_seq1	50.088	-5.07447	0.536259	-9.46271	3.00059e-21	7.88427e-19
comp2264911_c0_seq3	429.71	-5.30686	0.563458	-9.41838	4.58122e-21	1.19496e-18
comp2251620_c0_seq1	5987.92	3.14328	0.33436	9.40087	5.4114e-21	1.40128e-18
comp2272756_c0_seq1	414.932	-4.6828	0.498989	-9.38458	6.31678e-21	1.62396e-18
comp2274900_c0_seq10	485.353	-3.23978	0.346165	-9.35906	8.04509e-21	2.05351e-18
comp2264626_c0_seq3	278.162	-2.04371	0.218519	-9.35259	8.55257e-21	2.16756e-18
comp2254647_c0_seq2	1603.63	-2.78459	0.298051	-9.34266	9.39411e-21	2.36407e-18
comp2265255_c2_seq1	28601.3	4.72444	0.506203	9.33309	1.02827e-20	2.56959e-18
comp2261795_c0_seq1	185.922	3.35136	0.360425	9.29836	1.42623e-20	3.53932e-18
comp2266075_c0_seq5	546.07	-4.10474	0.441615	-9.29484	1.4743e-20	3.63339e-18
comp2273249_c0_seq4	7052.16	4.52942	0.487655	9.28817	1.56967e-20	3.84192e-18
comp2273791_c0_seq4	870.576	-3.87935	0.417987	-9.28104	1.67831e-20	4.0799e-18
comp2276664_c0_seq46	11933.1	-3.35733	0.362267	-9.26755	1.90463e-20	4.59879e-18
comp2260377_c0_seq3	400.89	-2.53609	0.274617	-9.235	2.58286e-20	6.19453e-18
comp2262714_c0_seq1	256.086	-3.86547	0.418647	-9.23325	2.62545e-20	6.21327e-18
comp2272814_c1_seq2	2673.53	-3.25949	0.352999	-9.23369	2.61473e-20	6.21327e-18
comp2277995_c0_seq1	6385.78	2.87296	0.311288	9.22928	2.72462e-20	6.40553e-18
comp2256206_c0_seq2	22.6185	-5.14217	0.557359	-9.22597	2.81015e-20	6.56345e-18
comp1281272_c0_seq1	834.389	4.04874	0.439711	9.20773	3.33092e-20	7.72924e-18
comp2273919_c0_seq1	1884.66	-3.30372	0.359841	-9.18103	4.26977e-20	9.84388e-18
comp2222258_c0_seq1	368.889	-1.65494	0.180923	-9.1472	5.84291e-20	1.33844e-17
comp2276795_c0_seq4	1038.62	-2.822	0.308696	-9.14169	6.14865e-20	1.3995e-17
comp2236889_c0_seq1	96.7218	-3.40253	0.372679	-9.12992	6.855e-20	1.5504e-17
comp2276244_c0_seq1	2015.38	2.7868	0.306266	9.09928	9.09354e-20	2.04376e-17
comp2259241_c0_seq1	102.199	-3.55634	0.391455	-9.08493	1.03769e-19	2.31762e-17
comp2264540_c1_seq15	295.345	-2.8008	0.308667	-9.07386	1.14879e-19	2.54736e-17
comp2269751_c0_seq2	280.657	-3.21495	0.354332	-9.07329	1.15481e-19	2.54736e-17
comp2263011_c0_seq1	4425.61	-3.80893	0.420088	-9.06698	1.22358e-19	2.68249e-17
comp2261841_c0_seq9	101.534	3.46256	0.382834	9.04456	1.50273e-19	3.2744e-17
comp2239531_c0_seq1	565.635	-3.23666	0.358801	-9.02077	1.86768e-19	4.04495e-17
comp2274336_c0_seq18	54.7311	-3.68197	0.408702	-9.00893	2.08068e-19	4.47911e-17
comp2250615_c0_seq1	60.862	-5.82301	0.647184	-8.99746	2.31006e-19	4.94311e-17
comp2266106_c0_seq2	663.002	-3.12218	0.347304	-8.98977	2.47751e-19	5.26987e-17
comp2261738_c0_seq5	911.578	-2.43476	0.271035	-8.98322	2.62952e-19	5.56011e-17
comp2280841_c0_seq1	431.088	-4.55672	0.507361	-8.98123	2.67758e-19	5.62844e-17
comp2261061_c0_seq1	124.017	-3.52759	0.393112	-8.9735	2.87245e-19	5.97803e-17
comp2264193_c0_seq2	120.313	-5.1823	0.577543	-8.97301	2.88526e-19	5.97803e-17
comp2268979_c0_seq1	964.821	-2.97059	0.331071	-8.97267	2.89408e-19	5.97803e-17
comp2270000_c0_seq4	1012.85	-4.52304	0.504175	-8.97117	2.93373e-19	6.02512e-17
comp2219247_c0_seq1	98.6642	-4.22736	0.471354	-8.96855	3.00456e-19	6.13531e-17
comp2259852_c1_seq1	621.099	-3.02464	0.337326	-8.9665	3.06077e-19	6.21457e-17
gnl|Pdu_trscr_assembly_1|88882	255.379	-3.96111	0.442328	-8.95513	3.3934e-19	6.85102e-17
comp2252998_c0_seq2	568.678	-4.30778	0.481204	-8.95209	3.48825e-19	7.00297e-17
comp2217620_c0_seq2	82.3502	-5.19815	0.581943	-8.93239	4.16886e-19	8.32257e-17
comp1927618_c0_seq1	325.28	-3.33152	0.37359	-8.91759	4.76528e-19	9.46039e-17
comp2259832_c0_seq2	1444.44	-3.06863	0.34421	-8.91498	4.87898e-19	9.63262e-17
comp2269064_c0_seq7	227.105	-3.52898	0.396052	-8.91039	5.08556e-19	9.98529e-17
comp2243368_c0_seq4	440.433	3.55665	0.399854	8.89488	5.84798e-19	1.14195e-16
comp2247744_c0_seq2	234.987	3.21427	0.361801	8.88408	6.44506e-19	1.25171e-16
comp2263124_c0_seq2	2096.14	-3.85688	0.434765	-8.87119	7.23714e-19	1.39794e-16
comp2261344_c0_seq3	562.531	-2.71713	0.306625	-8.8614	7.90124e-19	1.51801e-16
comp2141958_c0_seq2	127.122	-5.91505	0.669194	-8.83906	9.6531e-19	1.84467e-16
comp2278279_c1_seq4	6265.16	-3.13641	0.356254	-8.80385	1.32197e-18	2.5128e-16
comp2277945_c0_seq2	7794.32	2.36081	0.269942	8.74562	2.21803e-18	4.19372e-16
comp2254431_c0_seq4	116.789	-2.14993	0.246494	-8.72204	2.73244e-18	5.13915e-16
gnl|Pdu_trscr_assembly_1|20388	2090.52	3.73884	0.428898	8.71731	2.84886e-18	5.33005e-16
comp2273366_c2_seq1	239.526	-3.18156	0.365905	-8.69505	3.46684e-18	6.45247e-16
comp2267782_c1_seq1	92.8812	-3.53942	0.40714	-8.69337	3.5183e-18	6.51432e-16
comp2273540_c0_seq2	791.425	2.51043	0.288975	8.68738	3.70888e-18	6.83179e-16
comp2258209_c0_seq1	753.643	-1.9478	0.224412	-8.67959	3.9721e-18	7.24199e-16
comp2275893_c0_seq1	9017.89	4.37038	0.503504	8.67994	3.95987e-18	7.24199e-16
comp2266348_c1_seq2	1401.96	-2.71254	0.312784	-8.67225	4.23675e-18	7.68529e-16
comp1194202_c0_seq1	362.334	3.19195	0.369467	8.63933	5.65428e-18	1.02048e-15
comp2257070_c0_seq2	279584	2.34413	0.272317	8.60809	7.42879e-18	1.33401e-15
comp2266776_c0_seq2	416.511	-3.34242	0.389373	-8.5841	9.15485e-18	1.63574e-15
comp2266844_c0_seq4	954.205	-3.03574	0.354373	-8.56652	1.06663e-17	1.89633e-15
comp2140683_c0_seq1	726.058	4.45395	0.52022	8.56167	1.11246e-17	1.96801e-15
comp2261501_c0_seq1	502.825	3.33771	0.390912	8.53826	1.36259e-17	2.39863e-15
comp2273726_c1_seq7	831.231	2.25687	0.265349	8.50528	1.81155e-17	3.17332e-15
comp2266966_c1_seq7	7576.42	-4.37387	0.51472	-8.49756	1.93615e-17	3.37504e-15
comp2272075_c0_seq4	206.989	-3.94665	0.465062	-8.48629	2.13345e-17	3.70092e-15
comp2200316_c0_seq1	1097.07	-3.2187	0.379718	-8.47655	2.31974e-17	4.00463e-15
comp2264517_c0_seq6	207.841	-2.59977	0.306735	-8.47563	2.33819e-17	4.01709e-15
comp2140166_c0_seq1	2067.49	-2.04248	0.241143	-8.46997	2.45446e-17	4.19666e-15
comp2256699_c0_seq2	73.5186	3.67738	0.435671	8.44074	3.15333e-17	5.36592e-15
comp2197826_c0_seq1	214.776	-3.0699	0.363747	-8.43966	3.18251e-17	5.38991e-15
comp2263172_c0_seq5	483.422	-2.31728	0.274669	-8.43663	3.26605e-17	5.50529e-15
comp2239753_c0_seq1	82.2254	-4.42621	0.524874	-8.4329	3.3721e-17	5.65737e-15
comp2138995_c0_seq1	215.305	-3.68221	0.436938	-8.4273	3.53729e-17	5.90677e-15
comp2233130_c0_seq1	18.7829	-4.12239	0.49169	-8.38412	5.11088e-17	8.49476e-15
comp2255868_c0_seq1	95.3363	-3.20015	0.382129	-8.37452	5.54496e-17	9.17357e-15
gene19	105.614	-3.90709	0.467124	-8.36414	6.05552e-17	9.97208e-15
comp2277510_c0_seq2	622.595	2.78259	0.332747	8.36249	6.1409e-17	1.00663e-14
comp2264429_c0_seq2	86.4958	-3.15252	0.377179	-8.35816	6.37065e-17	1.03952e-14
comp2262537_c0_seq3	64.9692	-4.39949	0.526827	-8.35092	6.77313e-17	1.10017e-14
comp2252936_c1_seq1	788.515	-2.94789	0.353154	-8.34732	6.98266e-17	1.12907e-14
comp2267127_c0_seq1	389.656	-3.44253	0.412911	-8.33721	7.6063e-17	1.22438e-14
comp1194290_c0_seq1	942.589	4.37771	0.526286	8.31812	8.93703e-17	1.43213e-14
gnl|Pdu_trscr_assembly_1|6033	77.826	-3.91647	0.4713	-8.30994	9.57543e-17	1.52758e-14
comp2248585_c0_seq2	144.219	3.18009	0.383461	8.29313	1.10307e-16	1.75192e-14
comp2268625_c0_seq3	293.752	2.74591	0.331187	8.29113	1.1218e-16	1.77378e-14
comp2250762_c0_seq1	302.849	4.36543	0.528024	8.26748	1.36818e-16	2.15383e-14
comp2274804_c0_seq1	1309.41	2.68188	0.324563	8.26305	1.41995e-16	2.22552e-14
comp2268528_c0_seq2	498.607	2.68129	0.324941	8.2516	1.56286e-16	2.43881e-14
comp2139590_c0_seq1	549.332	-2.70948	0.328955	-8.23662	1.77137e-16	2.75217e-14
comp2269374_c0_seq3	6336.03	1.97851	0.240708	8.21953	2.04295e-16	3.16039e-14
comp2275616_c0_seq2	759.464	3.02389	0.36855	8.20483	2.30921e-16	3.55688e-14
comp2277815_c1_seq2	853.597	-3.28049	0.399918	-8.2029	2.34659e-16	3.59894e-14
comp2275488_c0_seq1	1059.19	-2.22091	0.271586	-8.17756	2.89659e-16	4.4235e-14
comp2270224_c0_seq1	356.399	1.95346	0.239219	8.16597	3.18864e-16	4.84877e-14
comp2229342_c0_seq1	17.1852	-3.9451	0.483835	-8.15382	3.52603e-16	5.33909e-14
comp2277237_c0_seq2	906.836	-1.81233	0.222469	-8.14641	3.74887e-16	5.65258e-14
comp2275022_c0_seq1	4722.03	-2.31842	0.285323	-8.12557	4.45252e-16	6.68533e-14
comp2263586_c0_seq1	576.59	-2.19587	0.270322	-8.12317	4.54181e-16	6.79086e-14
comp2264799_c1_seq2	441.377	2.78774	0.343248	8.12165	4.59884e-16	6.84748e-14
comp2277992_c0_seq1	1023.91	-3.29393	0.405667	-8.11979	4.66976e-16	6.92423e-14
comp2274541_c0_seq1	26893.4	3.7596	0.46307	8.11887	4.70531e-16	6.94812e-14
comp2238985_c0_seq1	219.958	3.8943	0.47995	8.11396	4.89967e-16	7.20534e-14
comp2242307_c0_seq1	35.8591	-4.01429	0.494888	-8.11152	4.99888e-16	7.3211e-14
comp2264585_c0_seq1	49.3777	-2.76352	0.340792	-8.10909	5.10005e-16	7.43879e-14
gnl|Pdu_trscr_assembly_1|12794	12373.2	2.02037	0.249385	8.10142	5.43219e-16	7.89103e-14
comp2273445_c0_seq4	85.3629	-3.47657	0.429225	-8.09963	5.51278e-16	7.97567e-14
comp2259648_c0_seq1	54.0616	4.22399	0.521946	8.09278	5.83199e-16	8.40348e-14
comp2266909_c1_seq3	293.198	-3.13602	0.388366	-8.07491	6.75279e-16	9.65244e-14
comp2278398_c0_seq2	374.568	4.01883	0.497684	8.07507	6.74377e-16	9.65244e-14
comp2269151_c0_seq2	85.7786	-3.61522	0.448205	-8.06599	7.26466e-16	1.03427e-13
comp2261379_c0_seq1	100876	2.5919	0.322292	8.04209	8.83198e-16	1.25242e-13
comp2260546_c0_seq1	299.599	-2.99086	0.371974	-8.04049	8.94772e-16	1.26382e-13
comp2273202_c0_seq1	49.6311	-3.97242	0.494312	-8.03627	9.26152e-16	1.29788e-13
comp2278536_c1_seq38	16022.8	2.53742	0.315744	8.03631	9.25861e-16	1.29788e-13
comp2274588_c0_seq5	2670.74	-1.7725	0.220774	-8.02855	9.86336e-16	1.37683e-13
comp2138058_c0_seq1	5079.86	4.66816	0.582578	8.01294	1.11995e-15	1.55726e-13
comp2266841_c0_seq1	444.864	3.97446	0.496481	8.00527	1.19207e-15	1.65111e-13
comp2276838_c1_seq1	1601.1	1.59568	0.199702	7.9903	1.34606e-15	1.8572e-13
comp2256548_c0_seq1	38.1931	-3.75174	0.470253	-7.97811	1.48587e-15	2.04222e-13
comp2279447_c0_seq1	87.6403	-4.92419	0.617299	-7.977	1.49931e-15	2.05279e-13
comp2251993_c0_seq1	260.244	3.81227	0.47837	7.96928	1.59596e-15	2.17678e-13
comp2254279_c0_seq1	326.638	-4.35833	0.54733	-7.9629	1.68051e-15	2.28339e-13
comp2254377_c0_seq1	56.0199	-4.62032	0.580816	-7.95488	1.79305e-15	2.41848e-13
comp2271737_c1_seq2	1642.12	3.54841	0.446068	7.95485	1.79347e-15	2.41848e-13
comp2246605_c0_seq1	5105.31	2.10345	0.264445	7.95421	1.80284e-15	2.42198e-13
comp2274390_c0_seq1	309.555	2.03489	0.255938	7.9507	1.85461e-15	2.48219e-13
comp2263829_c0_seq1	115.711	4.51922	0.56888	7.94406	1.95666e-15	2.609e-13
comp2258266_c0_seq1	198.55	-2.85191	0.359451	-7.93408	2.12065e-15	2.80819e-13
comp2262901_c0_seq1	676.677	-1.95286	0.246138	-7.93401	2.12176e-15	2.80819e-13
comp2270520_c0_seq5	1848.67	-3.31266	0.417767	-7.92943	2.20148e-15	2.90295e-13
comp2259786_c0_seq4	354.07	2.99725	0.378425	7.92033	2.3689e-15	3.11223e-13
comp2245203_c0_seq1	135.11	-3.70558	0.468031	-7.91737	2.42579e-15	3.1753e-13
comp2278290_c0_seq15	4734.41	-2.76446	0.350316	-7.89132	2.98999e-15	3.89954e-13
comp2246299_c0_seq1	109.076	-3.76866	0.477838	-7.88691	3.09759e-15	4.02517e-13
comp2276124_c0_seq3	2833.25	-3.11213	0.394626	-7.88629	3.11298e-15	4.03052e-13
comp2269547_c0_seq1	963.524	-2.22804	0.282958	-7.8741	3.43203e-15	4.42757e-13
comp2263229_c0_seq2	396.771	3.82544	0.486271	7.86688	3.63588e-15	4.67367e-13
comp2262305_c0_seq1	4994.17	2.1086	0.268056	7.86628	3.65357e-15	4.67958e-13
comp2274137_c1_seq25	3028.47	4.03818	0.513779	7.85977	3.84835e-15	4.91145e-13
comp2276641_c1_seq16	5582.87	-4.35694	0.554731	-7.85415	4.02494e-15	5.11855e-13
comp2271756_c0_seq2	1767.85	-3.90759	0.49839	-7.84043	4.49007e-15	5.68981e-13
comp2266360_c0_seq2	113.459	-2.20464	0.281218	-7.83962	4.51908e-15	5.70634e-13
comp2265611_c0_seq1	170.743	4.09626	0.522871	7.83417	4.71952e-15	5.93845e-13
comp2253194_c0_seq3	31.3144	-3.66811	0.468877	-7.82319	5.14995e-15	6.45731e-13
comp2258227_c1_seq1	129.083	3.52101	0.450442	7.8168	5.41826e-15	6.76998e-13
comp2241228_c0_seq2	1340.74	3.11307	0.398319	7.81552	5.4735e-15	6.81518e-13
comp2271417_c0_seq5	283.879	-2.30553	0.295116	-7.81227	5.61676e-15	6.96926e-13
comp2265181_c0_seq1	1736.8	2.8138	0.360488	7.80555	5.92443e-15	7.31268e-13
comp2269659_c0_seq1	374.088	-2.76235	0.353906	-7.80533	5.93446e-15	7.31268e-13
comp2259229_c0_seq1	170.882	-4.0682	0.521361	-7.80304	6.0435e-15	7.42146e-13
comp2232817_c0_seq2	580.956	-3.46843	0.444966	-7.79483	6.44962e-15	7.89306e-13
comp2250283_c0_seq1	33.6963	-4.76685	0.611678	-7.79306	6.54048e-15	7.97693e-13
comp2197371_c0_seq1	36.3204	-5.05121	0.648635	-7.78745	6.83752e-15	8.31084e-13
comp2273485_c0_seq5	1589.19	-2.55547	0.328851	-7.7709	7.7929e-15	9.43997e-13
comp2268735_c0_seq1	151.996	3.18575	0.410079	7.76863	7.93409e-15	9.57853e-13
comp2253589_c1_seq2	303.372	-1.58687	0.204542	-7.75818	8.6157e-15	1.03664e-12
comp2274736_c0_seq12	217.007	-4.87458	0.628487	-7.75605	8.76124e-15	1.05061e-12
gnl|Pdu_trscr_assembly_1|91632	574.987	-3.52905	0.455158	-7.75347	8.94148e-15	1.06864e-12
comp2271818_c0_seq1	343.656	-3.3722	0.435014	-7.75193	9.05032e-15	1.07804e-12
comp2257694_c0_seq1	71.2911	2.96125	0.382965	7.73243	1.05512e-14	1.25265e-12
comp2243104_c0_seq1	153.269	3.27519	0.42387	7.72688	1.10211e-14	1.3041e-12
comp2275031_c2_seq2	144.741	3.7331	0.483511	7.72082	1.15585e-14	1.36318e-12
comp2270986_c0_seq3	69.4532	-3.61319	0.468355	-7.71464	1.21325e-14	1.42616e-12
comp2276523_c0_seq2	34629.9	-2.32004	0.301058	-7.70628	1.29534e-14	1.51767e-12
comp2272270_c0_seq1	46.2386	-3.52024	0.456986	-7.70317	1.32727e-14	1.55e-12
comp2279956_c0_seq1	399.35	3.16261	0.410657	7.70135	1.3464e-14	1.56722e-12
comp2270752_c0_seq7	472.571	-3.67414	0.477244	-7.69867	1.37494e-14	1.59016e-12
comp2272387_c1_seq3	190.195	2.4741	0.321368	7.69866	1.37501e-14	1.59016e-12
comp2253831_c0_seq1	290.3	2.95051	0.383452	7.69461	1.41929e-14	1.63608e-12
comp2261071_c0_seq1	260.676	-3.74683	0.487003	-7.69364	1.4301e-14	1.64324e-12
comp2270372_c0_seq1	1375.29	-2.49658	0.324541	-7.69264	1.44126e-14	1.65075e-12
comp2273939_c0_seq1	227.931	-3.07453	0.399838	-7.68944	1.47784e-14	1.68724e-12
comp2269391_c0_seq1	437.819	2.74584	0.357339	7.68413	1.54041e-14	1.75307e-12
comp2278099_c2_seq1	308.625	2.92385	0.381035	7.67344	1.67445e-14	1.89957e-12
comp2272814_c0_seq4	1142.84	-3.18383	0.415193	-7.66831	1.74282e-14	1.97088e-12
comp2258643_c0_seq1	105.888	-2.48892	0.324818	-7.66249	1.82366e-14	2.0536e-12
comp2266311_c1_seq2	146.671	3.10793	0.405618	7.66222	1.82747e-14	2.0536e-12
comp2271848_c0_seq8	1027.16	2.77779	0.363796	7.63559	2.24793e-14	2.51818e-12
comp2269927_c0_seq1	98.9077	3.41608	0.447593	7.63211	2.30938e-14	2.57892e-12
comp2276806_c0_seq3	1545.43	-3.08618	0.404405	-7.63141	2.32198e-14	2.58492e-12
comp2253348_c0_seq1	45.3615	-3.79091	0.496913	-7.62892	2.36731e-14	2.6272e-12
comp2259280_c0_seq3	92.6831	-4.22235	0.554556	-7.61392	2.65913e-14	2.94191e-12
gnl|Pdu_trscr_assembly_1|7284	321.158	-3.66879	0.482601	-7.60211	2.91346e-14	3.21335e-12
comp2236155_c0_seq1	401.095	-3.64329	0.47963	-7.59605	3.05318e-14	3.35709e-12
gnl|Pdu_trscr_assembly_1|212085	35.0339	-3.86007	0.508434	-7.59206	3.14849e-14	3.45127e-12
comp2275883_c1_seq1	1003.96	-2.84178	0.37438	-7.59064	3.1832e-14	3.47864e-12
comp2268302_c0_seq1	2688.63	-4.57747	0.603135	-7.58946	3.21233e-14	3.49978e-12
comp2248121_c0_seq5	13.906	-4.18388	0.551614	-7.5848	3.33012e-14	3.61708e-12
comp2263395_c0_seq1	79.9769	-2.12234	0.280159	-7.5755	3.5775e-14	3.874e-12
comp2276996_c0_seq5	5399.9	-1.91214	0.252739	-7.56568	3.85841e-14	4.16557e-12
comp2252899_c0_seq1	1082.91	-2.27843	0.301227	-7.56385	3.91316e-14	4.21195e-12
comp2275024_c0_seq2	204.505	2.2772	0.301252	7.55913	4.05767e-14	4.35438e-12
comp2263896_c0_seq3	1024.01	-2.73621	0.362951	-7.53878	4.74392e-14	5.07556e-12
comp2274568_c0_seq1	112.958	-1.95504	0.259347	-7.53832	4.76058e-14	5.07819e-12
Pdu_Vtg_2.1	8.97667	-5.16408	0.68611	-7.52661	5.20736e-14	5.53825e-12
comp2240347_c0_seq3	188.427	-3.46752	0.461828	-7.50823	5.99304e-14	6.35493e-12
comp2276865_c1_seq1	244.637	-2.69905	0.359825	-7.50101	6.3327e-14	6.69524e-12
comp2263702_c0_seq1	433.355	-3.44572	0.459768	-7.49447	6.65691e-14	7.01724e-12
comp2273076_c1_seq5	1614.09	-1.69211	0.226067	-7.48501	7.15425e-14	7.51933e-12
comp2271710_c1_seq4	4597.32	-1.88995	0.252643	-7.48073	7.39093e-14	7.7453e-12
comp2273154_c0_seq3	397.784	-2.50662	0.335118	-7.47983	7.44199e-14	7.77601e-12
comp2234664_c1_seq2	394.562	2.1704	0.290352	7.47508	7.7155e-14	8.03829e-12
comp2257854_c0_seq3	573.113	2.51184	0.336336	7.46826	8.12639e-14	8.44176e-12
comp2259861_c0_seq1	126.202	3.41376	0.457249	7.46586	8.27544e-14	8.57167e-12
comp2266655_c0_seq4	217.219	3.32495	0.445458	7.4641	8.38706e-14	8.66218e-12
comp2264227_c0_seq2	52.5826	-2.94661	0.395092	-7.45805	8.78152e-14	9.04345e-12
comp2139506_c0_seq1	253.928	-3.58873	0.481415	-7.45453	9.01862e-14	9.26093e-12
comp2277700_c0_seq9	1217.37	1.22487	0.164525	7.44488	9.70323e-14	9.93539e-12
comp2261787_c0_seq1	210.386	-3.05662	0.411454	-7.42883	1.09564e-13	1.11865e-11
comp2252381_c0_seq5	166.717	3.20161	0.431024	7.42791	1.10323e-13	1.12319e-11
comp2243479_c0_seq1	40.7199	-3.83124	0.515949	-7.42563	1.12248e-13	1.13954e-11
comp2275871_c0_seq1	327.23	-1.74875	0.23563	-7.42158	1.15728e-13	1.17155e-11
comp2279767_c0_seq1	362.723	-2.03662	0.274485	-7.41977	1.1732e-13	1.1843e-11
comp2273340_c1_seq1	667.198	2.22258	0.299602	7.41846	1.18492e-13	1.19277e-11
comp2271384_c0_seq4	450.93	-1.54831	0.209052	-7.40636	1.29818e-13	1.3031e-11
gnl|Pdu_trscr_assembly_1|1902	1088.95	-2.74248	0.370474	-7.40262	1.33519e-13	1.3365e-11
comp2267731_c0_seq5	138.834	3.1418	0.424757	7.39669	1.39618e-13	1.39365e-11
comp2262211_c0_seq21	25522	-2.24546	0.303697	-7.39373	1.42764e-13	1.42108e-11
comp2201258_c0_seq1	41.9277	-3.51231	0.47514	-7.39216	1.44458e-13	1.43395e-11
comp2268127_c0_seq1	332.386	-2.04836	0.27717	-7.39024	1.46559e-13	1.45077e-11
comp2276143_c1_seq1	149.759	3.16873	0.428837	7.38912	1.47799e-13	1.459e-11
comp2253152_c0_seq1	1708.47	2.39709	0.324947	7.37688	1.62042e-13	1.5952e-11
comp2225064_c0_seq1	222.682	-3.03251	0.411125	-7.37612	1.62963e-13	1.59986e-11
comp2277104_c0_seq3	2529.52	2.54431	0.345326	7.36784	1.73413e-13	1.69778e-11
comp2266986_c0_seq3	257.456	4.51146	0.613384	7.35504	1.90866e-13	1.86355e-11
comp2259310_c0_seq2	31.6767	-4.41408	0.600993	-7.34464	2.06321e-13	2.00896e-11
comp2262340_c0_seq2	42.6537	-4.21116	0.573516	-7.3427	2.09323e-13	2.03265e-11
comp2250174_c0_seq1	368.224	-3.06298	0.417317	-7.3397	2.14073e-13	2.07314e-11
comp2263818_c0_seq1	194.378	-2.1045	0.286846	-7.33669	2.18938e-13	2.11453e-11
comp2252902_c0_seq1	33.0804	-3.99392	0.544573	-7.33403	2.23333e-13	2.15116e-11
comp2261881_c0_seq2	360.629	1.77824	0.242523	7.33226	2.26299e-13	2.17387e-11
comp2258876_c0_seq1	70.5401	3.94588	0.538656	7.32542	2.38144e-13	2.28152e-11
comp2272059_c1_seq1	3475.94	-1.72882	0.236061	-7.3236	2.41405e-13	2.30658e-11
comp2184756_c0_seq1	25.7268	-4.63464	0.633279	-7.31848	2.508e-13	2.38996e-11
comp2275646_c0_seq3	512.31	1.68096	0.229705	7.31787	2.5193e-13	2.39434e-11
comp2275593_c0_seq1	1046.64	-3.35951	0.459151	-7.31677	2.54006e-13	2.40767e-11
comp2271317_c1_seq3	361.275	-3.08428	0.422022	-7.30834	2.70472e-13	2.55696e-11
comp2268383_c0_seq1	29.1592	-3.96767	0.543196	-7.3043	2.78711e-13	2.6279e-11
comp2268128_c0_seq11	382.592	-2.34817	0.321514	-7.30347	2.80435e-13	2.63719e-11
comp2275110_c1_seq5	31229.8	-2.88689	0.395769	-7.29439	3.0002e-13	2.81397e-11
comp2259757_c0_seq3	60.4757	-4.2263	0.580497	-7.28049	3.3261e-13	3.11147e-11
comp2271101_c0_seq1	932.996	-2.24586	0.30867	-7.27593	3.44036e-13	3.20996e-11
comp2275017_c0_seq4	376.045	-3.30909	0.455668	-7.26206	3.81251e-13	3.54791e-11
comp2271608_c1_seq1	184.876	-2.58038	0.355502	-7.25842	3.91628e-13	3.63502e-11
comp2257591_c0_seq1	114.251	-3.92098	0.540501	-7.25434	4.03625e-13	3.72701e-11
comp2267733_c0_seq1	10529.9	2.64299	0.364326	7.25445	4.03288e-13	3.72701e-11
comp2270061_c0_seq1	148.841	-3.45153	0.475942	-7.25199	4.10678e-13	3.78237e-11
comp2274248_c0_seq12	206.202	-3.87531	0.534513	-7.25016	4.16294e-13	3.82423e-11
comp2273222_c0_seq2	820.411	3.03514	0.418866	7.24608	4.28995e-13	3.9308e-11
comp2252416_c0_seq1	51.4496	-2.29343	0.31658	-7.24439	4.34382e-13	3.96999e-11
comp2277114_c0_seq12	1452.54	-2.31072	0.319054	-7.24242	4.40746e-13	4.01788e-11
comp2265840_c0_seq3	144.804	-3.39347	0.468585	-7.24196	4.42255e-13	4.02137e-11
comp2278062_c0_seq4	4285.68	-4.08088	0.563871	-7.23725	4.57864e-13	4.15273e-11
comp1194190_c0_seq1	211.764	1.78567	0.246762	7.23643	4.60642e-13	4.16735e-11
comp2269014_c0_seq1	74.4003	2.87473	0.397293	7.23579	4.62834e-13	4.17661e-11
comp2278291_c0_seq2	115.719	-3.31994	0.45943	-7.22621	4.96657e-13	4.47054e-11
comp2258211_c0_seq1	28.6992	-3.88998	0.539947	-7.20438	5.83076e-13	5.23523e-11
comp2266660_c0_seq2	29.5612	-3.87313	0.537729	-7.20276	5.9004e-13	5.28448e-11
comp2271992_c0_seq4	393.888	-3.57492	0.496892	-7.19455	6.26662e-13	5.59844e-11
comp2278592_c0_seq3	399.739	1.97677	0.274844	7.19233	6.36955e-13	5.67621e-11
gnl|Pdu_trscr_assembly_1|760	340.29	-2.48221	0.345804	-7.17807	7.07024e-13	6.28496e-11
comp2264803_c1_seq1	83.1012	2.87711	0.401098	7.17307	7.33358e-13	6.50286e-11
comp2274596_c1_seq6	328.351	2.12152	0.29588	7.17021	7.48823e-13	6.62357e-11
comp2248557_c0_seq1	43.4566	-3.8893	0.542505	-7.16914	7.54679e-13	6.65888e-11
comp2277282_c0_seq11	25853.2	-3.06153	0.427116	-7.16791	7.61492e-13	6.70244e-11
comp2257649_c0_seq1	522.456	3.96294	0.552943	7.167	7.66595e-13	6.73078e-11
comp2277060_c0_seq17	138.996	2.85852	0.399626	7.153	8.4899e-13	7.43595e-11
comp2214176_c0_seq1	144.713	2.61691	0.365985	7.15031	8.65802e-13	7.56466e-11
comp2276904_c0_seq6	797.602	-3.17722	0.444427	-7.14903	8.73924e-13	7.617e-11
comp2277510_c3_seq1	192.162	1.94921	0.272767	7.14609	8.92871e-13	7.76319e-11
comp2269790_c0_seq1	298.826	2.21073	0.309417	7.1448	9.01285e-13	7.81733e-11
comp2276588_c0_seq4	232.859	2.17326	0.304799	7.13015	1.00257e-12	8.67481e-11
comp2268972_c0_seq3	333.327	-3.06938	0.430647	-7.12738	1.02298e-12	8.82998e-11
comp2260027_c0_seq1	247.16	-2.94571	0.413489	-7.12402	1.04824e-12	9.00486e-11
comp2271477_c1_seq2	518.813	3.01209	0.422828	7.12368	1.0508e-12	9.00486e-11
comp2275489_c0_seq1	84.5932	3.15726	0.44319	7.12394	1.04887e-12	9.00486e-11
comp1174362_c0_seq1	84.3194	-3.59846	0.505415	-7.11981	1.08077e-12	9.23959e-11
comp2236891_c0_seq1	241.935	2.26247	0.318443	7.10479	1.20509e-12	1.02778e-10
comp2268642_c1_seq1	168.072	-2.24825	0.316477	-7.10399	1.21203e-12	1.03124e-10
comp2259017_c0_seq2	390.782	1.87335	0.263745	7.1029	1.22168e-12	1.03698e-10
comp2266655_c1_seq2	96.1532	2.77852	0.39124	7.10183	1.23114e-12	1.04253e-10
comp2232850_c0_seq1	15.9158	-4.06243	0.572447	-7.09661	1.27857e-12	1.08013e-10
comp2273171_c1_seq1	134.094	2.63829	0.37179	7.09617	1.28262e-12	1.081e-10
comp2254586_c0_seq1	4710.02	2.86169	0.403563	7.09106	1.33092e-12	1.11907e-10
comp2277022_c0_seq15	305.89	-2.66887	0.376649	-7.08583	1.38213e-12	1.1594e-10
comp2270081_c0_seq3	383.303	-2.64766	0.373737	-7.08429	1.39757e-12	1.1696e-10
comp2254641_c1_seq1	806.385	3.00437	0.424207	7.08232	1.41762e-12	1.18361e-10
comp2266901_c1_seq8	498.25	-2.42851	0.343086	-7.07844	1.45784e-12	1.21436e-10
comp2269326_c0_seq2	1972.66	1.35409	0.191506	7.07073	1.54121e-12	1.28082e-10
comp2248791_c0_seq4	965.877	-1.24436	0.176256	-7.05994	1.66572e-12	1.38108e-10
comp2265722_c0_seq1	231.562	2.60633	0.369219	7.05905	1.67642e-12	1.38674e-10
comp2271744_c0_seq3	266.282	2.84089	0.402608	7.05622	1.71094e-12	1.41202e-10
comp2267157_c0_seq3	528.214	-3.66504	0.519826	-7.05051	1.78268e-12	1.46784e-10
comp2278583_c0_seq1	687.895	1.75764	0.249352	7.0488	1.80463e-12	1.48249e-10
comp2276446_c0_seq2	2497.04	-2.07785	0.294841	-7.04735	1.82352e-12	1.49458e-10
comp2276389_c0_seq2	954.946	1.96215	0.278649	7.04165	1.89976e-12	1.5535e-10
comp2273169_c2_seq2	1932.35	-2.57631	0.36596	-7.03988	1.924e-12	1.56973e-10
comp2271380_c0_seq2	173.732	-2.1322	0.30339	-7.0279	2.09661e-12	1.70666e-10
comp2176475_c0_seq1	34.2412	-3.57591	0.509751	-7.01502	2.2991e-12	1.86724e-10
comp2249950_c0_seq1	52.6166	-3.09023	0.440706	-7.01201	2.3492e-12	1.9036e-10
comp2267193_c0_seq1	63.617	-3.69202	0.526583	-7.01128	2.36155e-12	1.90928e-10
comp2254003_c0_seq1	97.945	-3.4413	0.491564	-7.00072	2.54652e-12	2.05418e-10
comp2263543_c0_seq5	215.435	-3.01207	0.430485	-6.99692	2.61652e-12	2.10588e-10
gene17	104250	-2.56923	0.367246	-6.99593	2.63496e-12	2.11596e-10
comp2242437_c0_seq2	33.8872	-2.94261	0.421119	-6.9876	2.79625e-12	2.24045e-10
comp2260578_c1_seq1	16.6477	-3.75162	0.537211	-6.98351	2.87891e-12	2.30152e-10
comp2271273_c0_seq2	178.572	2.76543	0.396212	6.97968	2.95844e-12	2.35982e-10
comp2262122_c0_seq14	40.3539	-3.91475	0.561882	-6.96722	3.23257e-12	2.57273e-10
comp2279764_c0_seq1	2282.62	1.77474	0.254874	6.9632	3.32627e-12	2.64143e-10
comp2263096_c0_seq1	1140.02	-2.11512	0.303914	-6.95961	3.41219e-12	2.70365e-10
gnl|Pdu_trscr_assembly_1|13616	222.065	2.65234	0.381165	6.9585	3.43907e-12	2.71892e-10
comp2241847_c0_seq5	73.1341	3.15858	0.454232	6.95367	3.55914e-12	2.80763e-10
comp2265029_c1_seq4	2318.19	-1.6151	0.23232	-6.95203	3.6006e-12	2.83408e-10
comp2274031_c0_seq3	685.11	1.86453	0.268247	6.95082	3.63171e-12	2.85229e-10
comp2265937_c0_seq5	1694.53	1.99149	0.286551	6.94987	3.65619e-12	2.86522e-10
comp1933325_c0_seq2	1832.39	2.23482	0.32164	6.94821	3.69943e-12	2.89276e-10
comp2267504_c3_seq1	159.334	1.66027	0.239418	6.93459	4.07394e-12	3.17865e-10
comp2269144_c1_seq1	38.9799	-2.35022	0.339134	-6.93006	4.20654e-12	3.27496e-10
comp2259627_c0_seq1	535.006	-1.97551	0.285351	-6.9231	4.41867e-12	3.42716e-10
comp2267666_c0_seq3	183.298	-2.37049	0.342407	-6.92302	4.42122e-12	3.42716e-10
comp2254551_c0_seq1	108.245	-1.94464	0.281005	-6.9203	4.50698e-12	3.48608e-10
comp2265803_c0_seq1	73.375	3.29107	0.475645	6.91917	4.54307e-12	3.50641e-10
comp2265966_c0_seq2	390.013	-3.12734	0.452286	-6.91451	4.6948e-12	3.61571e-10
comp2244057_c0_seq1	42.6017	-2.5987	0.375961	-6.91214	4.77401e-12	3.6688e-10
comp2271837_c0_seq3	170.821	-2.59003	0.374755	-6.91127	4.80322e-12	3.68332e-10
comp2273876_c0_seq8	418.169	-1.7274	0.249975	-6.9103	4.83627e-12	3.70073e-10
comp2266869_c0_seq1	559.134	3.21515	0.465342	6.90923	4.87305e-12	3.72091e-10
comp2272356_c0_seq4	942.52	-1.91443	0.277443	-6.90027	5.19029e-12	3.95469e-10
comp1267867_c0_seq1	153.711	3.24313	0.470144	6.89816	5.26798e-12	4.00534e-10
comp2274969_c0_seq7	578.65	-1.82833	0.265205	-6.89403	5.42336e-12	4.11473e-10
comp2138964_c0_seq1	224.006	2.42666	0.35217	6.8906	5.55577e-12	4.20626e-10
comp2254575_c0_seq1	317.65	-2.13294	0.309782	-6.88527	5.76776e-12	4.35753e-10
comp2270473_c0_seq2	599.116	-3.01992	0.438661	-6.8844	5.80301e-12	4.37491e-10
comp2268869_c0_seq6	493.08	3.40951	0.495378	6.88265	5.87506e-12	4.4199e-10
comp2276257_c2_seq1	94.45	-2.95656	0.42983	-6.87843	6.05176e-12	4.54327e-10
comp2241874_c0_seq1	148.49	-2.99637	0.435687	-6.87736	6.09716e-12	4.56775e-10
comp2278168_c0_seq13	390.822	1.70999	0.248777	6.8736	6.26015e-12	4.68005e-10
comp2253656_c0_seq3	842.372	2.59428	0.377644	6.86965	6.43607e-12	4.80152e-10
comp2273792_c0_seq1	414.164	-3.12755	0.455399	-6.86772	6.52356e-12	4.85666e-10
comp2271953_c0_seq4	1332.49	1.29216	0.188379	6.85937	6.91638e-12	5.1384e-10
comp2276867_c0_seq11	814.833	-2.66975	0.389486	-6.85455	7.15376e-12	5.30373e-10
comp2239558_c0_seq1	55.9617	-2.91553	0.425589	-6.85058	7.35511e-12	5.44171e-10
comp2268968_c0_seq3	268.45	1.6092	0.235213	6.84144	7.83985e-12	5.78837e-10
comp2267927_c0_seq4	114.817	3.19041	0.466576	6.83792	8.03498e-12	5.9202e-10
comp2267745_c0_seq3	55.9236	-2.60176	0.380555	-6.83675	8.10115e-12	5.95668e-10
comp1194044_c0_seq1	139.9	2.3887	0.349471	6.8352	8.18907e-12	6.00896e-10
comp2277610_c0_seq1	432.76	-3.25553	0.476319	-6.83476	8.21409e-12	6.01497e-10
comp2272502_c0_seq1	1794.76	-2.83187	0.414376	-6.83406	8.25451e-12	6.03221e-10
comp2258180_c0_seq1	67.9712	-3.43938	0.503675	-6.82857	8.57662e-12	6.24207e-10
comp2266805_c1_seq1	99.8252	2.41577	0.353765	6.82876	8.56545e-12	6.24207e-10
comp2257668_c0_seq1	32.7166	-3.44681	0.505256	-6.82191	8.98366e-12	6.52502e-10
comp2277034_c0_seq10	417.61	-2.38061	0.34922	-6.81694	9.29992e-12	6.74102e-10
comp2273607_c0_seq2	65.3328	3.51276	0.515359	6.81614	9.3518e-12	6.76491e-10
comp2278219_c1_seq2	4517.56	-2.34515	0.344299	-6.81137	9.6672e-12	6.97893e-10
comp2254530_c0_seq1	1063.19	3.10143	0.455594	6.80744	9.93504e-12	7.15023e-10
comp2267039_c0_seq7	197.935	2.90366	0.426551	6.8073	9.94449e-12	7.15023e-10
comp2213506_c0_seq1	260.252	2.68515	0.394551	6.80558	1.00641e-11	7.22172e-10
comp2275291_c1_seq1	372.469	2.80367	0.412343	6.79936	1.05086e-11	7.52553e-10
comp2262129_c0_seq3	300.112	-3.03471	0.446377	-6.79852	1.05701e-11	7.55442e-10
comp2268243_c0_seq2	88.5948	-2.6604	0.39139	-6.79732	1.06584e-11	7.60233e-10
comp2257310_c0_seq1	79.4118	2.92397	0.430761	6.78792	1.13764e-11	8.09835e-10
comp2201594_c0_seq1	93.3503	-2.80634	0.413507	-6.78668	1.14743e-11	8.15178e-10
comp2274834_c0_seq1	42.4128	-2.94357	0.434154	-6.78001	1.20169e-11	8.52034e-10
comp2268642_c0_seq2	103.504	-2.5049	0.370106	-6.76808	1.30502e-11	9.23463e-10
comp2254333_c0_seq1	238.989	1.62482	0.240211	6.76416	1.34089e-11	9.46971e-10
comp2270739_c0_seq1	966.154	-2.28673	0.33824	-6.76068	1.37348e-11	9.68075e-10
comp2277503_c0_seq1	541.422	-2.17287	0.321652	-6.75533	1.42515e-11	1.00251e-09
comp1195529_c0_seq1	71.8896	-3.55476	0.526454	-6.75227	1.45551e-11	1.02186e-09
comp2268375_c0_seq1	1579.86	2.73687	0.405447	6.75025	1.47596e-11	1.03418e-09
comp2277331_c0_seq3	980.362	-2.57222	0.381329	-6.74542	1.52587e-11	1.06706e-09
comp2277808_c1_seq1	136.943	3.09986	0.459808	6.74165	1.56599e-11	1.09298e-09
comp2279378_c0_seq1	279.837	3.41468	0.50657	6.74079	1.5753e-11	1.09734e-09
comp2252351_c0_seq1	37.5204	-2.4494	0.363386	-6.74048	1.57863e-11	1.09752e-09
comp2266783_c2_seq1	82.1701	-2.30714	0.342697	-6.7323	1.66997e-11	1.15877e-09
comp2260778_c0_seq1	811.437	-3.69748	0.549284	-6.73145	1.67975e-11	1.16329e-09
gnl|Pdu_trscr_assembly_1|17237	2167.41	-1.85012	0.275098	-6.72531	1.7522e-11	1.21112e-09
comp2262241_c0_seq1	1460.56	3.0197	0.449176	6.72275	1.78324e-11	1.23019e-09
comp2272887_c1_seq2	650.668	-3.12823	0.465344	-6.7224	1.78755e-11	1.23079e-09
comp2277689_c0_seq2	8791.56	-1.83513	0.273031	-6.72131	1.801e-11	1.23767e-09
comp2267792_c0_seq2	1223.45	2.30138	0.342477	6.7198	1.81974e-11	1.24815e-09
comp2253379_c0_seq1	741.883	-1.97135	0.293427	-6.71837	1.83772e-11	1.25806e-09
comp1943186_c0_seq1	150.559	2.99931	0.446545	6.71672	1.85863e-11	1.26995e-09
comp2244052_c0_seq1	8.65323	-4.34274	0.646865	-6.71353	1.89975e-11	1.29557e-09
comp2246432_c0_seq1	380.462	3.22839	0.481074	6.71081	1.93553e-11	1.31745e-09
comp2243143_c0_seq1	37.1117	-2.00151	0.298446	-6.70645	1.9941e-11	1.35474e-09
comp2267481_c0_seq3	61.809	-2.10081	0.313663	-6.69766	2.11778e-11	1.43603e-09
comp2266336_c1_seq2	181.011	-2.59662	0.387773	-6.69625	2.13841e-11	1.44727e-09
comp2258733_c0_seq1	39.2388	-4.00846	0.599295	-6.68863	2.25264e-11	1.5217e-09
comp2250017_c0_seq1	152.775	1.84581	0.27634	6.67949	2.3978e-11	1.61671e-09
comp2262932_c1_seq1	165.524	1.96123	0.293738	6.6768	2.44213e-11	1.64349e-09
comp2268827_c0_seq4	82.1843	-2.08352	0.312375	-6.66994	2.55911e-11	1.71898e-09
comp2270709_c0_seq3	1290.85	-1.87142	0.280848	-6.66347	2.67428e-11	1.79297e-09
comp2273626_c1_seq1	2498.62	-1.96245	0.294613	-6.66111	2.71772e-11	1.81868e-09
comp2216809_c0_seq2	57.2812	3.15232	0.473495	6.65755	2.78432e-11	1.85977e-09
comp2276039_c0_seq1	1609.53	-1.99087	0.299268	-6.65246	2.88226e-11	1.92159e-09
comp2278436_c0_seq3	2988.98	1.64728	0.247845	6.64639	3.0036e-11	1.99877e-09
comp2261993_c0_seq1	6631.2	1.67576	0.252165	6.64547	3.02252e-11	2.00761e-09
comp2276761_c0_seq5	269.182	2.71017	0.407943	6.64352	3.06278e-11	2.03058e-09
comp2253924_c0_seq2	961.531	-2.91937	0.439699	-6.63947	3.14802e-11	2.08323e-09
comp2257612_c0_seq1	15.816	-3.93218	0.592797	-6.63327	3.28325e-11	2.1687e-09
comp1315948_c0_seq1	455.884	-3.51516	0.530437	-6.62691	3.42791e-11	2.26008e-09
comp2210398_c0_seq1	57.8054	-3.69326	0.557451	-6.62526	3.46639e-11	2.27705e-09
comp2259561_c0_seq1	34.0464	3.26027	0.492081	6.62546	3.4617e-11	2.27705e-09
comp2277143_c0_seq2	153.022	-2.67307	0.403669	-6.62194	3.54517e-11	2.32453e-09
comp2267710_c1_seq1	105.208	3.46222	0.523156	6.61794	3.64232e-11	2.38385e-09
comp2263902_c0_seq1	574.74	-1.5664	0.236707	-6.61747	3.6539e-11	2.38706e-09
comp2269401_c0_seq1	826.772	-1.77659	0.268518	-6.61627	3.68385e-11	2.39786e-09
comp2273169_c1_seq1	251.701	-2.62872	0.397307	-6.61633	3.68225e-11	2.39786e-09
comp2209889_c0_seq4	208.076	-2.35266	0.355897	-6.6105	3.8302e-11	2.48859e-09
comp2241541_c0_seq2	1326.99	1.6083	0.243361	6.60872	3.87653e-11	2.50956e-09
comp2268999_c0_seq1	828.844	-2.37228	0.358955	-6.60883	3.87358e-11	2.50956e-09
comp2234888_c0_seq2	25.5448	-3.1453	0.475995	-6.60784	3.89958e-11	2.51992e-09
comp2270346_c1_seq2	283.417	-1.47209	0.222802	-6.60715	3.91786e-11	2.52716e-09
comp2275258_c0_seq6	2310.6	2.00844	0.30413	6.60388	4.00544e-11	2.579e-09
comp2272887_c0_seq5	168.382	-2.61822	0.396635	-6.60108	4.08173e-11	2.62339e-09
comp2253579_c0_seq1	125.895	-1.40195	0.212483	-6.59797	4.16835e-11	2.67426e-09
gnl|Pdu_trscr_assembly_1|86887	3338.82	-2.57748	0.391009	-6.59186	4.34338e-11	2.78156e-09
comp2206928_c0_seq1	556.909	-2.27123	0.344778	-6.58749	4.47313e-11	2.85952e-09
comp2266919_c0_seq1	512.124	-1.33338	0.202447	-6.58633	4.5082e-11	2.8768e-09
comp2254631_c0_seq1	5511.67	-2.60512	0.395806	-6.58181	4.64766e-11	2.9605e-09
comp2239992_c0_seq1	315.012	-1.87725	0.285378	-6.57812	4.76446e-11	3.0295e-09
comp2278488_c0_seq1	479.371	2.85248	0.433841	6.57496	4.86662e-11	3.08896e-09
gnl|Pdu_trscr_assembly_1|264488	18.1138	-3.31095	0.503643	-6.574	4.89808e-11	3.09963e-09
comp2266208_c1_seq3	136.676	2.25606	0.343184	6.57392	4.90078e-11	3.09963e-09
comp2260163_c0_seq1	310.801	-1.33541	0.203209	-6.57161	4.97754e-11	3.14262e-09
comp2250610_c0_seq2	158.715	3.46588	0.527545	6.56983	5.03724e-11	3.1747e-09
comp2273333_c0_seq5	998.911	-2.15215	0.327872	-6.56399	5.23855e-11	3.29577e-09
comp2265568_c0_seq2	49.3627	-3.32021	0.506113	-6.56021	5.37315e-11	3.37451e-09
comp2254406_c0_seq1	155.286	2.6089	0.398095	6.55346	5.622e-11	3.5246e-09
comp2278595_c0_seq12	1971.34	2.23231	0.340867	6.54892	5.79539e-11	3.62694e-09
comp2274611_c0_seq1	184.146	-2.88039	0.440046	-6.54565	5.92366e-11	3.70074e-09
comp2271554_c1_seq2	146.427	-2.44266	0.373356	-6.54243	6.05289e-11	3.77487e-09
comp2240069_c0_seq1	679.849	-2.4926	0.381194	-6.53893	6.19591e-11	3.85733e-09
comp2267868_c0_seq12	108.189	2.75505	0.422027	6.52815	6.65855e-11	4.13814e-09
comp2028238_c0_seq1	167.427	1.81665	0.278386	6.52566	6.77044e-11	4.1931e-09
comp2272645_c0_seq1	1331.1	3.24782	0.497697	6.52569	6.76901e-11	4.1931e-09
comp2271592_c0_seq12	152.476	3.07753	0.471859	6.52214	6.93103e-11	4.28513e-09
comp2265014_c0_seq1	1003.02	-2.8177	0.432253	-6.51863	7.09515e-11	4.37902e-09
comp2222124_c0_seq1	93.3941	1.95743	0.300658	6.51049	7.49081e-11	4.61524e-09
comp2277462_c0_seq1	115.415	3.03659	0.466942	6.50314	7.86616e-11	4.83816e-09
comp2261571_c0_seq1	100.939	-2.69138	0.413897	-6.50253	7.89788e-11	4.84932e-09
comp2263282_c0_seq2	247.268	-2.88337	0.443521	-6.50109	7.97411e-11	4.88773e-09
comp2249058_c0_seq2	1223.02	2.82497	0.434924	6.49531	8.28607e-11	5.07025e-09
comp2277289_c2_seq2	319.664	-2.63172	0.405267	-6.49379	8.3706e-11	5.11322e-09
comp2258728_c0_seq2	119.589	2.23762	0.345396	6.47841	9.26952e-11	5.65267e-09
comp2275732_c0_seq3	179.303	-2.90149	0.447998	-6.47658	9.38255e-11	5.71185e-09
comp2267958_c0_seq3	1158.6	-1.34313	0.207463	-6.47406	9.54053e-11	5.79815e-09
comp2265599_c0_seq1	237.497	-2.774	0.428502	-6.4737	9.56317e-11	5.80204e-09
comp1198086_c0_seq1	237.575	-2.93004	0.452701	-6.47235	9.64904e-11	5.84421e-09
comp2273729_c0_seq3	80.9411	-3.18227	0.491889	-6.46949	9.83328e-11	5.94187e-09
comp2276230_c0_seq1	335.822	2.36064	0.364896	6.46933	9.84353e-11	5.94187e-09
comp2259694_c0_seq2	116.831	2.961	0.45808	6.46393	1.0202e-10	6.14789e-09
comp2269228_c0_seq1	4982.73	-1.40149	0.216894	-6.46162	1.03589e-10	6.23189e-09
comp2208952_c0_seq1	126.478	2.05127	0.317497	6.46076	1.04181e-10	6.25699e-09
gnl|Pdu_trscr_assembly_1|7485	147.757	-1.82546	0.28279	-6.45518	1.08087e-10	6.4807e-09
comp2277084_c2_seq1	207.251	3.38386	0.524522	6.45132	1.10884e-10	6.63723e-09
comp2241744_c0_seq2	330.424	2.61492	0.405627	6.4466	1.1439e-10	6.83569e-09
comp2268858_c0_seq10	1576.2	1.6473	0.255612	6.44453	1.15956e-10	6.91099e-09
comp2277737_c0_seq3	358.048	1.39812	0.216951	6.44443	1.16037e-10	6.91099e-09
comp2263299_c0_seq2	66.3952	-2.67691	0.415531	-6.44215	1.17792e-10	7.00384e-09
comp2262137_c0_seq4	5311.86	2.5201	0.391225	6.44157	1.18241e-10	7.01886e-09
comp2271937_c0_seq1	53.0849	-2.76024	0.42866	-6.43922	1.20087e-10	7.11659e-09
comp2265162_c0_seq2	138.978	-1.92141	0.298515	-6.43657	1.22206e-10	7.2302e-09
comp2278017_c0_seq2	308.526	2.07114	0.321833	6.43544	1.23118e-10	7.27209e-09
comp2270985_c1_seq1	2659.93	2.95189	0.458956	6.43176	1.26135e-10	7.43799e-09
comp2273455_c0_seq2	726.775	-1.66377	0.259082	-6.42178	1.34693e-10	7.92956e-09
gnl|Pdu_trscr_assembly_1|10810	2785.23	-1.26643	0.197347	-6.41726	1.38747e-10	8.15483e-09
comp2138556_c0_seq1	13.8788	-3.81583	0.594669	-6.41673	1.39228e-10	8.16966e-09
comp2254640_c0_seq1	3621.72	3.17004	0.494402	6.41187	1.43745e-10	8.42085e-09
comp2277818_c0_seq4	990.185	-2.50475	0.390848	-6.40851	1.46946e-10	8.5943e-09
comp2221608_c0_seq2	33.7836	2.73589	0.427132	6.40525	1.50126e-10	8.76595e-09
comp2199259_c0_seq2	152.776	1.91675	0.299761	6.39427	1.61314e-10	9.40385e-09
comp2276258_c0_seq2	5042.96	1.5149	0.236931	6.39385	1.61755e-10	9.41422e-09
comp2267918_c0_seq2	407.329	-2.5208	0.394294	-6.3932	1.62448e-10	9.43918e-09
comp2247991_c0_seq1	265.08	2.115	0.330929	6.39111	1.64689e-10	9.55383e-09
comp1975994_c0_seq1	945.005	-2.13227	0.333766	-6.3885	1.67522e-10	9.70241e-09
comp2265341_c0_seq2	45.5045	2.80971	0.440117	6.38401	1.72511e-10	9.97522e-09
comp2277005_c0_seq3	920.816	-3.1269	0.489973	-6.38178	1.75043e-10	1.01053e-08
comp2271225_c0_seq5	44988.3	2.75378	0.431612	6.38022	1.76831e-10	1.0192e-08
comp2265059_c0_seq2	250.083	-2.15554	0.337942	-6.37842	1.78925e-10	1.02961e-08
comp2268582_c0_seq4	92.909	2.55459	0.401767	6.35839	2.03877e-10	1.17131e-08
comp2270326_c0_seq1	2552.93	-1.84155	0.289681	-6.35717	2.05501e-10	1.17875e-08
comp2269929_c1_seq2	619.98	-1.75969	0.27693	-6.35426	2.09426e-10	1.19933e-08
comp2277716_c1_seq2	399.099	-1.88938	0.297923	-6.34185	2.27026e-10	1.29804e-08
comp2192355_c0_seq1	13.0884	-3.87355	0.611833	-6.33106	2.43483e-10	1.38992e-08
comp2257880_c0_seq2	452.053	-2.17156	0.343035	-6.33042	2.44491e-10	1.39344e-08
gnl|Pdu_trscr_assembly_1|219156	2963.86	3.20818	0.506857	6.32956	2.45865e-10	1.39904e-08
comp2275901_c0_seq1	278.338	1.51309	0.239139	6.32722	2.49621e-10	1.41816e-08
comp2270954_c0_seq2	352.154	2.43957	0.385774	6.32383	2.55154e-10	1.44729e-08
comp2267077_c0_seq2	749.137	2.02959	0.320995	6.32283	2.56823e-10	1.45445e-08
comp2252128_c0_seq9	2016.52	-1.65869	0.262431	-6.32048	2.60758e-10	1.4744e-08
comp2263059_c1_seq1	50.0482	-2.43133	0.384835	-6.31787	2.65196e-10	1.49712e-08
comp2016072_c0_seq1	125.78	2.9153	0.461565	6.31613	2.68198e-10	1.51168e-08
comp2269661_c1_seq3	875.69	1.09383	0.173193	6.3157	2.68938e-10	1.51346e-08
comp2251833_c0_seq1	25.1531	-2.49515	0.395096	-6.31529	2.69651e-10	1.51509e-08
comp2200124_c0_seq1	245.983	-2.1572	0.341643	-6.31419	2.71574e-10	1.5235e-08
comp2269425_c0_seq2	216.94	-2.98938	0.473463	-6.31386	2.72154e-10	1.52436e-08
comp2266932_c0_seq2	2435.41	-1.7942	0.28419	-6.3134	2.72968e-10	1.52653e-08
comp2261606_c0_seq1	253.132	-1.98432	0.314484	-6.30975	2.79478e-10	1.56049e-08
comp2244623_c0_seq1	75.1795	2.87898	0.456464	6.30714	2.84236e-10	1.58458e-08
comp2266416_c0_seq4	103.377	2.24654	0.356512	6.30142	2.94922e-10	1.64159e-08
comp2272495_c0_seq1	3738.7	-1.76927	0.280883	-6.29896	2.99652e-10	1.66533e-08
comp2275659_c1_seq6	3571.96	-1.97793	0.31424	-6.29434	3.0871e-10	1.71301e-08
comp2278332_c0_seq1	745.933	2.21916	0.352843	6.28935	3.18802e-10	1.76626e-08
comp2276641_c0_seq2	4176.84	-2.54305	0.40444	-6.28782	3.21946e-10	1.78092e-08
comp2261825_c0_seq1	259.454	-1.91463	0.304547	-6.28682	3.24025e-10	1.78965e-08
comp2261649_c0_seq2	168.647	2.71628	0.432122	6.28591	3.25931e-10	1.7974e-08
comp2274657_c0_seq1	1161.53	-1.7366	0.276308	-6.28503	3.27799e-10	1.80491e-08
comp2272098_c0_seq6	143.174	3.2785	0.521965	6.28107	3.3625e-10	1.8486e-08
comp2276609_c1_seq2	91.9272	3.37256	0.536988	6.28053	3.3743e-10	1.85223e-08
comp2272751_c0_seq7	185.172	1.84083	0.293157	6.27931	3.40078e-10	1.86391e-08
comp2266631_c0_seq1	816.498	-2.08127	0.33158	-6.27681	3.45583e-10	1.89118e-08
comp2274193_c0_seq5	1678.54	-1.59438	0.254061	-6.27559	3.48301e-10	1.90314e-08
comp2275683_c0_seq3	1655.56	-1.98404	0.316181	-6.27501	3.49614e-10	1.9074e-08
comp2274822_c1_seq1	1595.91	-2.26087	0.360374	-6.27367	3.52625e-10	1.91797e-08
comp2278512_c0_seq10	12158.8	-2.07727	0.331104	-6.27377	3.52413e-10	1.91797e-08
comp2261728_c0_seq2	164.556	-1.69307	0.26988	-6.27342	3.53201e-10	1.91818e-08
comp2242712_c0_seq1	11.2389	-3.83865	0.612244	-6.2698	3.6151e-10	1.96033e-08
comp2254374_c1_seq4	204.483	-2.89689	0.462685	-6.26104	3.8241e-10	2.07052e-08
comp2226460_c0_seq1	360.621	-3.97553	0.635044	-6.26024	3.84387e-10	2.07807e-08
comp2271099_c0_seq5	58.7167	-2.04158	0.32621	-6.25847	3.88783e-10	2.09867e-08
comp2259973_c0_seq2	254.291	2.06911	0.330905	6.25288	4.02958e-10	2.1719e-08
gnl|Pdu_trscr_assembly_1|2470	365.47	-2.63706	0.421808	-6.2518	4.05762e-10	2.18372e-08
comp2271544_c0_seq1	299.052	-2.20413	0.352623	-6.25068	4.08679e-10	2.19611e-08
comp2268018_c0_seq3	72.1667	-3.22025	0.515342	-6.24876	4.13718e-10	2.21985e-08
comp2253516_c0_seq4	99348.7	2.02692	0.324547	6.24539	4.22753e-10	2.26493e-08
comp2254063_c0_seq2	14.1812	-3.85809	0.618274	-6.24009	4.37323e-10	2.33948e-08
comp2193521_c0_seq1	29.0764	3.44416	0.552061	6.23873	4.41138e-10	2.35636e-08
comp2257274_c0_seq1	120.647	2.49296	0.400042	6.23174	4.61289e-10	2.46032e-08
comp2269738_c0_seq1	4966.01	-2.04823	0.328762	-6.23013	4.66059e-10	2.47836e-08
comp2279527_c0_seq1	409.503	-3.1043	0.498255	-6.23034	4.6543e-10	2.47836e-08
comp2248527_c0_seq2	3161.67	-2.2927	0.368042	-6.22944	4.68117e-10	2.48561e-08
comp2252193_c0_seq2	552.782	2.74484	0.440733	6.22791	4.72696e-10	2.5062e-08
comp2253186_c0_seq1	4995.79	2.5234	0.405222	6.2272	4.74845e-10	2.51386e-08
comp2237121_c0_seq1	750.676	-2.31653	0.372154	-6.22464	4.82659e-10	2.55145e-08
comp2257281_c0_seq1	263.225	2.64994	0.426215	6.21737	5.05569e-10	2.66828e-08
comp2263556_c0_seq2	409.478	-2.0481	0.329428	-6.21715	5.06253e-10	2.66828e-08
comp2250674_c0_seq3	101.49	2.1256	0.341943	6.21623	5.09237e-10	2.68006e-08
comp2277461_c0_seq3	1094.98	-1.91447	0.307998	-6.21585	5.10487e-10	2.68268e-08
comp2277034_c1_seq4	205.415	-2.36108	0.37987	-6.21549	5.11651e-10	2.68486e-08
comp2269865_c0_seq6	1576.34	-1.6512	0.265675	-6.21511	5.12892e-10	2.68614e-08
comp2277297_c1_seq4	365.403	-1.89772	0.305347	-6.21495	5.134e-10	2.68614e-08
gnl|Pdu_trscr_assembly_1|16743	116.106	3.06589	0.493413	6.21364	5.17695e-10	2.70465e-08
comp2256831_c0_seq1	446.779	2.54997	0.410414	6.21317	5.19279e-10	2.70897e-08
comp2235485_c0_seq1	21.0597	-4.19981	0.676071	-6.21208	5.22867e-10	2.72371e-08
comp2258113_c0_seq1	609.974	1.66192	0.267709	6.20794	5.36831e-10	2.79238e-08
comp1192934_c0_seq1	223.785	-3.01112	0.485247	-6.20534	5.45788e-10	2.83485e-08
comp2205034_c0_seq1	123.853	3.58174	0.577262	6.2047	5.48008e-10	2.84224e-08
comp2261064_c0_seq1	941.104	-2.44913	0.39476	-6.2041	5.50121e-10	2.84907e-08
comp2270604_c0_seq3	4541.65	1.71846	0.27704	6.20292	5.54256e-10	2.86633e-08
comp2243810_c0_seq2	1964.52	-2.30183	0.371163	-6.20166	5.58701e-10	2.88514e-08
comp2272091_c0_seq2	556.16	2.12883	0.343296	6.20114	5.6056e-10	2.89057e-08
comp2275857_c0_seq4	2675.37	-2.00571	0.32387	-6.19295	5.90476e-10	3.04044e-08
comp2245338_c0_seq1	23.9012	3.52545	0.569339	6.19218	5.93395e-10	3.05107e-08
comp2278252_c0_seq1	1717.49	1.89328	0.305913	6.18897	6.05593e-10	3.10932e-08
comp2266173_c0_seq2	19.3668	-2.92357	0.472468	-6.18788	6.09806e-10	3.12646e-08
comp2260337_c0_seq2	52.8142	-2.46705	0.398841	-6.18553	6.18926e-10	3.16414e-08
comp2272223_c0_seq1	34.7552	-2.42245	0.391625	-6.18565	6.18473e-10	3.16414e-08
comp2274552_c0_seq10	901.849	-2.38364	0.38539	-6.185	6.21037e-10	3.1704e-08
comp2267067_c0_seq8	1122.29	2.18391	0.353611	6.17603	6.57329e-10	3.35088e-08
comp2271179_c1_seq1	182.997	2.95301	0.478409	6.17256	6.71938e-10	3.42047e-08
comp2246287_c0_seq3	76.7057	-2.24036	0.363	-6.17178	6.7526e-10	3.43249e-08
comp2275955_c0_seq3	233.141	1.50428	0.24379	6.17037	6.81292e-10	3.45824e-08
comp2259006_c0_seq2	434.623	2.16256	0.350697	6.16647	6.98303e-10	3.53955e-08
comp2254585_c0_seq3	1422.44	-1.70235	0.276161	-6.16435	7.07749e-10	3.58235e-08
comp2268008_c0_seq3	8692.05	-1.5584	0.252903	-6.16205	7.18098e-10	3.62959e-08
comp2257627_c0_seq2	272.546	-1.8085	0.293633	-6.15906	7.31783e-10	3.69354e-08
comp2277018_c0_seq3	80.1703	-2.71882	0.441474	-6.15851	7.34338e-10	3.70121e-08
comp2244199_c0_seq1	403.502	2.02172	0.328294	6.15828	7.35411e-10	3.70139e-08
comp2265580_c1_seq5	151.626	2.41836	0.392753	6.15746	7.39212e-10	3.7153e-08
comp2277430_c0_seq5	198.748	2.45779	0.39946	6.15278	7.61358e-10	3.82123e-08
comp2270680_c0_seq2	404.988	-1.93862	0.31512	-6.15201	7.65056e-10	3.8344e-08
comp1368210_c0_seq1	181.596	-2.99693	0.487197	-6.15137	7.68176e-10	3.84464e-08
gnl|Pdu_trscr_assembly_1|16825	1679.25	-1.3597	0.221107	-6.1495	7.77251e-10	3.8792e-08
comp2276165_c0_seq6	5342.74	-2.60024	0.422833	-6.14958	7.76889e-10	3.8792e-08
comp2251338_c0_seq8	151.069	2.57871	0.419497	6.14713	7.88973e-10	3.93221e-08
comp2273492_c0_seq13	122.533	-2.41346	0.392702	-6.14578	7.95718e-10	3.96031e-08
comp2236259_c0_seq1	27257.5	1.90128	0.309478	6.14353	8.07099e-10	4.01136e-08
comp2239692_c0_seq1	77.2189	2.98928	0.487012	6.13801	8.35595e-10	4.14722e-08
comp2254433_c0_seq1	279.156	3.01685	0.491618	6.13658	8.43159e-10	4.17332e-08
comp2277298_c0_seq4	1413.55	-2.21089	0.360281	-6.13658	8.43189e-10	4.17332e-08
comp2267951_c0_seq1	2539.23	-2.71437	0.442344	-6.13634	8.44449e-10	4.17378e-08
comp2277160_c2_seq1	775.587	-2.3118	0.376772	-6.13582	8.47228e-10	4.18172e-08
comp2249602_c0_seq3	95.1824	-3.1426	0.512388	-6.13323	8.61105e-10	4.24436e-08
comp2140131_c0_seq1	203.619	-1.72329	0.281029	-6.13207	8.67413e-10	4.26674e-08
comp2206658_c0_seq1	231.292	-1.35065	0.220264	-6.13196	8.68033e-10	4.26674e-08
comp2270043_c0_seq2	49.3488	3.00883	0.490726	6.13138	8.71211e-10	4.27647e-08
comp2260530_c0_seq1	151.448	-1.66333	0.271319	-6.13052	8.75901e-10	4.2936e-08
comp2270240_c0_seq1	7424.57	-2.6629	0.434448	-6.12939	8.82176e-10	4.31843e-08
comp2277503_c1_seq4	270.87	-1.93791	0.316528	-6.12241	9.21704e-10	4.50576e-08
comp2274945_c0_seq5	493.588	-1.41917	0.231965	-6.11802	9.47448e-10	4.62528e-08
comp1984701_c0_seq1	1616.82	1.6514	0.269946	6.11751	9.50494e-10	4.63382e-08
comp2266442_c0_seq5	92.0785	3.07858	0.504019	6.10805	1.00853e-09	4.91006e-08
comp2264734_c0_seq1	93.211	2.26403	0.371134	6.10032	1.05856e-09	5.1466e-08
comp2269749_c0_seq2	2151.09	-1.41943	0.23295	-6.09331	1.10597e-09	5.36252e-08
comp2277062_c0_seq6	211.177	-2.4318	0.399085	-6.09343	1.10515e-09	5.36252e-08
comp2270626_c0_seq2	181.392	-1.86272	0.30596	-6.08809	1.14265e-09	5.53287e-08
comp2257239_c0_seq2	345.743	2.43866	0.40075	6.08525	1.1631e-09	5.62426e-08
comp2263728_c0_seq1	595.125	-3.70155	0.608635	-6.08172	1.189e-09	5.74174e-08
comp2243948_c0_seq4	167.611	-2.2336	0.367844	-6.07215	1.26207e-09	6.08152e-08
comp2271325_c1_seq2	14.9287	-3.307	0.544625	-6.07206	1.26276e-09	6.08152e-08
comp2268816_c0_seq17	239.99	-2.22459	0.366481	-6.07013	1.27807e-09	6.14696e-08
comp2226073_c0_seq2	43.6566	-3.56425	0.587459	-6.06723	1.30133e-09	6.25043e-08
comp2140778_c0_seq1	132.44	-2.31233	0.381244	-6.06522	1.31772e-09	6.32063e-08
comp2263482_c0_seq1	90.0053	-2.64328	0.436102	-6.06115	1.3515e-09	6.47396e-08
comp2271994_c0_seq2	185060	2.08458	0.344504	6.05097	1.43979e-09	6.88769e-08
comp2262222_c0_seq5	58.1244	-2.19266	0.362555	-6.04779	1.46849e-09	7.01558e-08
comp2254606_c0_seq2	132.247	-2.21559	0.366689	-6.04214	1.52079e-09	7.25575e-08
comp2200386_c0_seq5	698.188	-2.13273	0.353016	-6.04146	1.52727e-09	7.27691e-08
comp2261589_c0_seq1	45.5686	-2.54185	0.420898	-6.03913	1.54949e-09	7.37299e-08
comp2127369_c0_seq1	110.325	2.5795	0.427209	6.03804	1.56002e-09	7.41319e-08
comp2268249_c0_seq4	92.3145	3.19206	0.52899	6.03426	1.59696e-09	7.56859e-08
comp2273103_c0_seq8	627.981	2.09809	0.347689	6.03438	1.5957e-09	7.56859e-08
comp2276273_c0_seq7	1024.16	1.91361	0.317321	6.03053	1.63419e-09	7.73483e-08
comp2261716_c0_seq2	4313.05	2.02753	0.336307	6.02881	1.65169e-09	7.80727e-08
comp1934156_c0_seq1	91.7945	1.95207	0.323966	6.02553	1.68554e-09	7.95678e-08
comp2265764_c0_seq1	63.4094	2.57665	0.427724	6.02409	1.70059e-09	8.01721e-08
comp2275830_c1_seq1	46.7976	-2.59945	0.431868	-6.01909	1.75399e-09	8.2581e-08
comp2264068_c0_seq1	567.801	1.63802	0.27218	6.01815	1.76419e-09	8.29518e-08
comp2266918_c0_seq2	21.8542	-3.18863	0.530086	-6.01531	1.79547e-09	8.43115e-08
gnl|Pdu_trscr_assembly_1|18304	113.281	3.08313	0.51281	6.01222	1.83003e-09	8.58218e-08
comp2270281_c0_seq1	142.63	2.13217	0.354671	6.01167	1.83625e-09	8.60003e-08
comp2244718_c0_seq4	34.8708	2.84103	0.47282	6.00869	1.87028e-09	8.74798e-08
comp2267939_c0_seq1	32.965	-3.39254	0.564647	-6.00825	1.87535e-09	8.7602e-08
comp2272494_c0_seq1	236.951	1.68919	0.281179	6.00752	1.88378e-09	8.78809e-08
comp2206896_c0_seq1	12.2011	-3.66239	0.610088	-6.00305	1.93647e-09	9.02213e-08
comp2262029_c0_seq1	38.7178	3.22729	0.53779	6.00102	1.96076e-09	9.12341e-08
comp2213012_c1_seq1	24.4462	-3.66339	0.610868	-5.99703	2.00959e-09	9.33845e-08
comp2263921_c0_seq2	3386.87	1.69575	0.282972	5.99262	2.06485e-09	9.5828e-08
comp2265366_c0_seq1	326.532	-1.93518	0.323015	-5.991	2.08552e-09	9.65363e-08
comp2268433_c0_seq1	159.519	-2.45173	0.409225	-5.99117	2.08338e-09	9.65363e-08
comp2256174_c0_seq1	55.4841	-2.70762	0.452115	-5.98879	2.11406e-09	9.77306e-08
comp2197409_c0_seq2	328.017	-2.7406	0.457758	-5.98701	2.13727e-09	9.86763e-08
gnl|Pdu_trscr_assembly_1|2615	1225.11	-2.31352	0.386689	-5.98291	2.19192e-09	1.01069e-07
comp2273432_c0_seq4	139.395	-2.65622	0.44413	-5.98073	2.22141e-09	1.02297e-07
comp2274684_c0_seq22	1234.85	-1.84504	0.308784	-5.97516	2.29861e-09	1.05494e-07
comp2274947_c0_seq3	242.824	2.0792	0.347958	5.97544	2.29468e-09	1.05494e-07
comp2277416_c0_seq3	5644.57	2.93891	0.491861	5.97509	2.2997e-09	1.05494e-07
comp2263577_c0_seq1	653.195	1.77007	0.296294	5.97402	2.31484e-09	1.05916e-07
comp2270152_c0_seq4	1464.16	-1.14351	0.191413	-5.97404	2.31446e-09	1.05916e-07
comp2258543_c0_seq1	1010	-2.0305	0.339978	-5.97244	2.33731e-09	1.06808e-07
comp1908346_c0_seq1	21.7703	-3.40811	0.570662	-5.9722	2.34078e-09	1.0683e-07
comp2260209_c0_seq1	165.067	-2.00618	0.335936	-5.97192	2.34479e-09	1.06876e-07
comp2255582_c0_seq1	62.7307	-2.0834	0.348882	-5.97165	2.34865e-09	1.06915e-07
comp2277331_c1_seq5	1314.48	-1.84188	0.308447	-5.97145	2.35161e-09	1.06915e-07
comp2270156_c0_seq11	3331.49	2.03488	0.340782	5.97122	2.35487e-09	1.06927e-07
comp2253261_c0_seq2	29.5924	-2.53271	0.424323	-5.96884	2.38951e-09	1.08225e-07
comp2267586_c4_seq1	23.0088	3.28598	0.550514	5.96892	2.38824e-09	1.08225e-07
comp2271648_c0_seq1	128.035	2.68028	0.44907	5.96851	2.39437e-09	1.08307e-07
comp2263251_c1_seq2	53.6164	-2.36703	0.396604	-5.96824	2.39821e-09	1.08344e-07
comp2253491_c1_seq2	66.2681	2.94651	0.49372	5.96798	2.40203e-09	1.08379e-07
comp2271649_c0_seq1	1577.45	3.04417	0.510113	5.96764	2.40715e-09	1.08474e-07
comp2259602_c0_seq3	55.0395	-1.76819	0.296445	-5.96465	2.45156e-09	1.10335e-07
comp2141714_c0_seq1	653.618	-2.91434	0.488689	-5.96359	2.46751e-09	1.10774e-07
comp2263761_c0_seq9	390.489	-2.09439	0.351195	-5.96362	2.4671e-09	1.10774e-07
comp2248806_c0_seq1	78.3245	-2.64811	0.444125	-5.96252	2.48379e-09	1.11365e-07
comp2269619_c0_seq1	1380.85	-3.05736	0.512792	-5.96218	2.4889e-09	1.11455e-07
comp2262867_c0_seq2	117.123	-2.04741	0.34346	-5.96113	2.50502e-09	1.12036e-07
comp2258014_c0_seq1	3290.52	1.53044	0.256769	5.96039	2.51641e-09	1.12337e-07
comp2262938_c0_seq1	9724.58	-1.80106	0.302178	-5.96028	2.51802e-09	1.12337e-07
comp2246811_c0_seq5	144.792	-2.59038	0.43507	-5.95395	2.61746e-09	1.16551e-07
comp2276940_c0_seq2	1605.65	2.57612	0.43268	5.95385	2.61901e-09	1.16551e-07
comp2271959_c0_seq4	832.909	-2.14791	0.360776	-5.95358	2.62332e-09	1.16598e-07
comp2265986_c0_seq1	4082.66	-1.99944	0.335873	-5.95298	2.63305e-09	1.16884e-07
comp2260860_c0_seq2	853.806	2.04027	0.342839	5.9511	2.66346e-09	1.18088e-07
comp2226033_c0_seq1	129.936	-2.36664	0.397748	-5.95011	2.67969e-09	1.1866e-07
comp2260227_c0_seq2	769.86	-1.3675	0.229892	-5.94844	2.70703e-09	1.19722e-07
comp2256160_c0_seq1	51.314	-2.5032	0.420833	-5.94819	2.71125e-09	1.19761e-07
comp2258826_c0_seq1	87.8412	-2.79979	0.470869	-5.946	2.74771e-09	1.21222e-07
comp2258219_c0_seq1	15.175	-3.77039	0.634691	-5.94052	2.84123e-09	1.25193e-07
comp2248059_c0_seq4	679.542	2.61823	0.440934	5.93792	2.88668e-09	1.27039e-07
comp2253679_c0_seq3	1410.54	2.69257	0.453661	5.93519	2.93503e-09	1.29008e-07
comp2270443_c0_seq7	218.644	2.74993	0.463454	5.93355	2.96456e-09	1.29986e-07
comp2272070_c1_seq2	422.235	1.83589	0.309403	5.93365	2.96279e-09	1.29986e-07
comp2142794_c0_seq1	1241.73	2.59689	0.437899	5.93034	3.02313e-09	1.32392e-07
comp2277723_c2_seq1	416.087	2.68146	0.452232	5.9294	3.04036e-09	1.32983e-07
comp2254383_c0_seq1	4477.07	2.57863	0.434949	5.92858	3.0557e-09	1.33491e-07
comp2238090_c0_seq1	20.8297	-2.96223	0.499743	-5.9275	3.07585e-09	1.34207e-07
comp2250163_c0_seq2	106.406	1.92533	0.324947	5.92506	3.12188e-09	1.36049e-07
comp2257867_c0_seq1	2439.63	-1.05867	0.178683	-5.92484	3.12608e-09	1.36066e-07
comp2272305_c0_seq1	702.9	-1.92315	0.324643	-5.92389	3.14416e-09	1.36687e-07
comp2266617_c0_seq1	764.202	-2.90423	0.490364	-5.9226	3.1689e-09	1.37595e-07
comp2279736_c0_seq1	1358.79	1.84966	0.312439	5.92007	3.21799e-09	1.39557e-07
comp2265919_c1_seq23	1826.74	2.53719	0.428918	5.91532	3.31225e-09	1.43297e-07
comp2269333_c0_seq9	251.833	2.04306	0.345376	5.91548	3.30915e-09	1.43297e-07
comp2259637_c0_seq1	35.0304	2.97529	0.503043	5.9146	3.32688e-09	1.43756e-07
comp2276678_c0_seq7	2237.13	-1.79885	0.30415	-5.91434	3.33202e-09	1.43804e-07
comp2277921_c0_seq1	2741.15	-1.80166	0.304639	-5.91407	3.33747e-09	1.43866e-07
comp2276293_c1_seq2	1459.72	2.32948	0.393959	5.91301	3.35918e-09	1.44627e-07
comp2265615_c0_seq3	371.934	-3.16784	0.535958	-5.91061	3.40849e-09	1.46573e-07
comp2274294_c0_seq10	792.092	-1.55446	0.263094	-5.90837	3.45505e-09	1.48397e-07
comp2255734_c1_seq9	179.648	2.77081	0.469073	5.90699	3.48412e-09	1.49466e-07
comp2261753_c0_seq3	85.8866	-1.84117	0.311756	-5.9058	3.50943e-09	1.50205e-07
comp2276343_c0_seq1	1521.9	1.52843	0.258802	5.90578	3.50976e-09	1.50205e-07
comp2246233_c0_seq2	615.252	2.25637	0.382094	5.90527	3.52067e-09	1.50492e-07
comp2262834_c0_seq3	176.479	-3.15004	0.533549	-5.90394	3.54916e-09	1.51528e-07
comp2272961_c0_seq1	299.576	-1.85849	0.314892	-5.90199	3.59143e-09	1.5315e-07
comp2271349_c0_seq1	1062.9	2.1534	0.364894	5.90144	3.60334e-09	1.53475e-07
comp2268821_c0_seq7	134.96	-2.61106	0.442611	-5.89923	3.65207e-09	1.55365e-07
gi|146189532|emb|AM697680.1|_Platynereis_dumerilii_mRNA_for_hypothetical_protein_(ORF1),_isolate_8	11.628	-3.81332	0.646549	-5.89797	3.67998e-09	1.56366e-07
comp2269800_c0_seq22	1231.96	-2.29978	0.389972	-5.8973	3.69505e-09	1.5682e-07
comp2267788_c0_seq5	2755.99	-1.78639	0.303236	-5.8911	3.83632e-09	1.62623e-07
comp2274915_c0_seq1	253.423	-1.76911	0.300501	-5.88722	3.92755e-09	1.66293e-07
comp2274254_c1_seq4	350.7	1.63432	0.277771	5.88368	4.01243e-09	1.69685e-07
comp2267703_c0_seq2	68.69	2.34531	0.398731	5.88194	4.05488e-09	1.71278e-07
comp2277815_c0_seq5	3596.28	-2.60379	0.443077	-5.87661	4.18758e-09	1.76675e-07
comp2268090_c0_seq2	134.309	-1.70342	0.289898	-5.87591	4.2052e-09	1.77208e-07
comp2267412_c0_seq1	59.3996	2.95786	0.503596	5.87348	4.26749e-09	1.79621e-07
gnl|Pdu_trscr_assembly_1|1332	1956.75	1.56887	0.267159	5.87241	4.29499e-09	1.80567e-07
comp2234671_c0_seq1	1046.73	-2.00633	0.341696	-5.87169	4.31366e-09	1.81138e-07
comp2269365_c0_seq1	3443.63	-1.63883	0.279303	-5.86755	4.42277e-09	1.85502e-07
comp2277636_c1_seq2	3039.38	-2.13634	0.364391	-5.86276	4.55223e-09	1.90708e-07
comp2258783_c0_seq1	21.1012	-3.15904	0.538988	-5.86106	4.59923e-09	1.92451e-07
comp1897429_c0_seq1	569.465	-1.65656	0.282708	-5.85963	4.6391e-09	1.93893e-07
comp1985114_c0_seq1	354.945	1.86594	0.318549	5.85762	4.69552e-09	1.95793e-07
gnl|Pdu_trscr_assembly_1|159181	43.1677	-3.00881	0.513656	-5.85765	4.69467e-09	1.95793e-07
comp2255435_c0_seq1	1668.6	-3.39481	0.580409	-5.849	4.94535e-09	2.0597e-07
comp2277760_c0_seq2	243.012	-1.68198	0.287602	-5.8483	4.96611e-09	2.06594e-07
gnl|Pdu_trscr_assembly_1|1117	504.339	2.11742	0.362121	5.84728	4.99662e-09	2.0738e-07
comp2276368_c0_seq9	2777.51	-1.52887	0.261463	-5.84738	4.99376e-09	2.0738e-07
comp2269145_c1_seq1	191.293	2.84284	0.486501	5.84344	5.11351e-09	2.11985e-07
comp2269213_c0_seq3	410.787	-2.5773	0.441108	-5.84277	5.13389e-09	2.12584e-07
comp2261897_c0_seq2	252.691	-2.73686	0.468468	-5.84215	5.15307e-09	2.13131e-07
comp2260942_c0_seq2	171.869	-1.39794	0.239329	-5.84107	5.18657e-09	2.14268e-07
comp2258198_c0_seq1	210.348	1.27331	0.218014	5.84046	5.20562e-09	2.14721e-07
comp2276419_c0_seq10	674.814	-1.67046	0.286021	-5.84034	5.20955e-09	2.14721e-07
comp1901146_c0_seq1	24.2641	-3.19307	0.546777	-5.83981	5.226e-09	2.15151e-07
comp2266139_c1_seq2	150.696	2.36084	0.40436	5.83846	5.26852e-09	2.16652e-07
comp2276609_c0_seq2	611.51	1.56133	0.267431	5.83826	5.27475e-09	2.16659e-07
comp2272118_c0_seq11	3428.15	-1.70222	0.291607	-5.83736	5.30359e-09	2.17594e-07
comp2273199_c1_seq30	3046.97	-1.68581	0.288819	-5.8369	5.31813e-09	2.1794e-07
comp2261373_c0_seq1	24418.6	1.30645	0.223943	5.83386	5.41607e-09	2.21699e-07
comp2235392_c0_seq1	896.907	-1.73357	0.297372	-5.82965	5.55441e-09	2.27101e-07
comp2266986_c2_seq3	58.8963	3.65661	0.627287	5.82925	5.56777e-09	2.27388e-07
comp2270682_c0_seq1	114.68	-2.8766	0.493562	-5.82824	5.60157e-09	2.28507e-07
comp2272749_c1_seq3	714.866	1.33916	0.229825	5.82686	5.64789e-09	2.30134e-07
comp2272124_c0_seq1	2487.49	2.2226	0.381514	5.82572	5.68652e-09	2.31317e-07
comp2276586_c0_seq3	266.705	-3.08529	0.529606	-5.82563	5.68988e-09	2.31317e-07
comp2227525_c0_seq3	13.1023	-3.15668	0.542246	-5.82148	5.83281e-09	2.36591e-07
comp2271521_c0_seq3	130.976	-2.69269	0.462544	-5.82148	5.83284e-09	2.36591e-07
comp1196706_c0_seq1	2565.08	1.45984	0.250805	5.8206	5.86355e-09	2.37567e-07
comp2259091_c0_seq3	28.8466	-2.35153	0.404115	-5.81895	5.92172e-09	2.39652e-07
comp2223422_c0_seq1	407.809	1.44524	0.24847	5.81656	6.00719e-09	2.42836e-07
gnl|Pdu_trscr_assembly_1|7274	2751.43	-1.20662	0.207476	-5.81573	6.03707e-09	2.43768e-07
comp2142646_c0_seq4	23375.5	2.88176	0.495603	5.81466	6.07588e-09	2.45058e-07
comp2278580_c0_seq11	496.642	1.29174	0.222168	5.81426	6.0903e-09	2.45363e-07
comp2273404_c0_seq1	3026.69	-3.21912	0.553738	-5.81344	6.12009e-09	2.46285e-07
comp2261079_c0_seq1	1441.01	3.0474	0.524367	5.81157	6.18904e-09	2.48221e-07
comp2270649_c0_seq5	1037.73	-2.34155	0.402907	-5.81163	6.18685e-09	2.48221e-07
comp2276040_c1_seq5	4579.33	-1.71512	0.295116	-5.8117	6.18424e-09	2.48221e-07
comp2274564_c0_seq2	274.392	1.70167	0.293316	5.80147	6.57373e-09	2.6306e-07
comp2277289_c0_seq1	558.157	-2.83665	0.488947	-5.80154	6.57102e-09	2.6306e-07
comp2261886_c0_seq2	460.1	-2.61633	0.45101	-5.80104	6.59034e-09	2.63136e-07
comp2273132_c0_seq2	32.2976	-2.47196	0.426123	-5.80104	6.59036e-09	2.63136e-07
comp2142776_c0_seq1	39.7101	2.92154	0.503778	5.79927	6.66041e-09	2.65636e-07
comp2270370_c0_seq3	36.9517	-2.06045	0.35541	-5.79739	6.73542e-09	2.68328e-07
comp2260877_c0_seq1	24.7061	-3.29293	0.568272	-5.79465	6.84648e-09	2.72449e-07
comp2200430_c0_seq3	294.686	1.77738	0.307206	5.78564	7.22363e-09	2.87137e-07
comp2248027_c0_seq1	136.489	2.66321	0.460422	5.78428	7.28226e-09	2.89146e-07
comp1193815_c0_seq1	23.4198	-3.57875	0.618821	-5.78318	7.3301e-09	2.90723e-07
comp2275664_c0_seq4	900.784	-1.65221	0.285794	-5.78112	7.42043e-09	2.93979e-07
comp2261767_c1_seq3	34.2997	-2.79858	0.484327	-5.77828	7.54686e-09	2.98657e-07
comp2277231_c1_seq4	619.749	-1.92156	0.332726	-5.77521	7.68594e-09	3.03824e-07
comp2267437_c1_seq1	1367.82	1.90784	0.330413	5.77411	7.73593e-09	3.05462e-07
comp2274586_c0_seq4	546.95	-1.79617	0.311184	-5.77205	7.83128e-09	3.08886e-07
comp2138971_c0_seq1	448.971	1.57776	0.273455	5.76974	7.93957e-09	3.12812e-07
comp2254637_c0_seq1	134.751	2.32757	0.40378	5.76444	8.193e-09	3.22308e-07
comp2276910_c0_seq34	4297.95	-1.88829	0.327583	-5.76432	8.19863e-09	3.22308e-07
comp2273204_c0_seq26	8710.03	1.03979	0.180394	5.76397	8.21562e-09	3.22621e-07
comp1981288_c0_seq1	314.8	1.2838	0.223005	5.75682	8.57115e-09	3.3511e-07
comp2265504_c0_seq1	110.928	-2.23283	0.387832	-5.75722	8.55128e-09	3.3511e-07
comp2272168_c0_seq4	725.378	1.95453	0.339506	5.75698	8.5631e-09	3.3511e-07
comp2278373_c0_seq1	2774.17	2.24067	0.389216	5.75687	8.56863e-09	3.3511e-07
comp2256945_c0_seq3	22.3905	-3.19946	0.555816	-5.75632	8.59687e-09	3.35748e-07
comp2270180_c0_seq1	303.358	-2.00319	0.348127	-5.75419	8.70598e-09	3.39638e-07
comp2260219_c0_seq1	47.5168	-3.38776	0.589101	-5.75073	8.88597e-09	3.46282e-07
comp2268156_c1_seq2	58.4748	-2.86649	0.498586	-5.74924	8.96433e-09	3.48955e-07
comp2266847_c0_seq1	1517.21	2.7504	0.478556	5.74729	9.06831e-09	3.52618e-07
comp2278048_c1_seq1	233.744	-2.39593	0.416941	-5.74644	9.11398e-09	3.54009e-07
comp2257855_c0_seq2	56.3092	-3.25473	0.566442	-5.74593	9.14191e-09	3.54708e-07
comp2272257_c1_seq3	3031.2	1.40885	0.245232	5.74499	9.19247e-09	3.56283e-07
comp2249204_c0_seq1	165.879	2.3942	0.416809	5.74412	9.24013e-09	3.57742e-07
comp2232388_c0_seq1	73.7776	2.5136	0.437912	5.73996	9.47002e-09	3.66246e-07
comp2273696_c0_seq2	109.019	-2.08536	0.363695	-5.7338	9.82064e-09	3.79395e-07
comp2270884_c0_seq1	70.2794	2.90374	0.506841	5.72909	1.00969e-08	3.89646e-07
comp2271653_c0_seq2	135.383	-1.5346	0.267892	-5.72842	1.01371e-08	3.90776e-07
comp2278282_c0_seq5	908.079	-2.69172	0.470084	-5.72605	1.02795e-08	3.95838e-07
comp2272431_c0_seq4	1360.37	-1.55478	0.271538	-5.72583	1.02931e-08	3.95936e-07
comp1193769_c0_seq1	525.386	2.70389	0.4725	5.72251	1.04959e-08	4.03303e-07
comp2276510_c0_seq8	262.654	-1.54755	0.270473	-5.72163	1.0551e-08	4.04982e-07
comp2193984_c0_seq1	29.6236	-2.833	0.495564	-5.71673	1.08596e-08	4.16381e-07
comp2266735_c0_seq5	296.814	2.28075	0.399076	5.71508	1.09655e-08	4.19993e-07
comp2257543_c0_seq2	567.589	-2.19633	0.384341	-5.71453	1.1001e-08	4.20901e-07
comp2254167_c0_seq1	2540.91	-2.76643	0.484453	-5.71041	1.12705e-08	4.30749e-07
comp2260503_c0_seq2	482.498	-1.96762	0.344579	-5.71022	1.12832e-08	4.30775e-07
comp2251106_c0_seq1	23023.7	2.81737	0.493468	5.70932	1.13426e-08	4.32579e-07
comp2220459_c0_seq1	40.4673	3.16682	0.55498	5.70619	1.15536e-08	4.40156e-07
comp2275466_c0_seq14	1190.67	-1.85832	0.325682	-5.70594	1.15701e-08	4.40318e-07
comp2139301_c0_seq1	17.99	-3.54684	0.621671	-5.70533	1.16116e-08	4.41426e-07
comp2266783_c1_seq1	134.119	-2.19305	0.384516	-5.7034	1.17439e-08	4.4598e-07
comp2278087_c0_seq7	882.717	-1.87803	0.329339	-5.70243	1.18115e-08	4.48071e-07
comp2254076_c0_seq1	16.4521	-2.85462	0.500772	-5.70044	1.195e-08	4.52844e-07
comp2277581_c0_seq10	398.839	-2.15456	0.378022	-5.69955	1.20125e-08	4.54731e-07
comp2273269_c0_seq6	71.1628	1.97916	0.347539	5.69478	1.23532e-08	4.67135e-07
comp2239709_c0_seq1	53.524	-3.24785	0.570352	-5.69446	1.23761e-08	4.67503e-07
comp2256629_c0_seq1	197.188	-1.36621	0.240029	-5.69184	1.25674e-08	4.74231e-07
comp2276780_c0_seq2	801.787	1.12477	0.19782	5.68582	1.30185e-08	4.90734e-07
comp2254617_c0_seq2	243.383	-1.81705	0.319729	-5.68311	1.32271e-08	4.98072e-07
comp2271893_c0_seq3	253.484	2.17479	0.382801	5.68125	1.33717e-08	5.02988e-07
comp2237456_c0_seq1	91.9961	2.12853	0.374735	5.68008	1.34635e-08	5.04847e-07
comp2255078_c0_seq3	14.8861	-3.4964	0.615539	-5.68022	1.34523e-08	5.04847e-07
comp2267474_c0_seq1	401.79	-1.37691	0.242396	-5.68041	1.34372e-08	5.04847e-07
gnl|Pdu_trscr_assembly_1|13513	733.777	-1.5648	0.275521	-5.67944	1.35137e-08	5.06197e-07
gnl|Pdu_trscr_assembly_1|1345	1938.41	-2.39468	0.421927	-5.67558	1.38219e-08	5.17199e-07
comp2262339_c0_seq1	12792.4	-1.72259	0.304128	-5.66404	1.47854e-08	5.52673e-07
comp2140459_c0_seq2	93.1194	-3.60372	0.636309	-5.66347	1.48338e-08	5.53903e-07
comp2272061_c0_seq3	325.003	-0.961195	0.16986	-5.65876	1.52469e-08	5.68735e-07
comp2261512_c0_seq2	952.963	-2.12679	0.376075	-5.65523	1.55642e-08	5.79964e-07
comp2275241_c0_seq5	429.505	2.36242	0.417995	5.6518	1.58778e-08	5.91033e-07
comp2278021_c0_seq3	3194.12	1.72589	0.305469	5.64996	1.60482e-08	5.96757e-07
comp2258671_c0_seq2	171.111	-2.57765	0.456378	-5.64806	1.62267e-08	6.02768e-07
comp2248738_c0_seq1	148.37	-1.60935	0.284995	-5.64694	1.63328e-08	6.06078e-07
comp2267074_c0_seq1	224.809	2.18899	0.387876	5.64354	1.66589e-08	6.17539e-07
comp2258794_c0_seq1	75.0483	-2.60777	0.462151	-5.64267	1.67428e-08	6.20005e-07
comp2275437_c0_seq1	43.4609	-2.57065	0.455601	-5.64234	1.67754e-08	6.20569e-07
comp2276539_c0_seq2	1207.69	1.33661	0.237032	5.63895	1.7109e-08	6.32254e-07
comp2249511_c0_seq1	26.6314	-2.17826	0.386335	-5.63827	1.71768e-08	6.33514e-07
comp2274726_c0_seq7	221.852	1.87519	0.332584	5.63825	1.71785e-08	6.33514e-07
comp2272161_c2_seq6	549.472	1.67324	0.296795	5.6377	1.72337e-08	6.34892e-07
comp2272684_c0_seq6	441.635	1.63788	0.290699	5.63428	1.75795e-08	6.46966e-07
comp1956628_c0_seq1	79.6712	-2.88161	0.511569	-5.63288	1.77221e-08	6.51542e-07
comp2260528_c0_seq1	253.01	-2.43735	0.432787	-5.63176	1.78383e-08	6.5514e-07
comp2277394_c0_seq13	228.501	1.29067	0.229281	5.62921	1.81035e-08	6.64197e-07
comp2267696_c0_seq11	190.475	-2.79729	0.496953	-5.62888	1.8138e-08	6.64782e-07
comp2238162_c0_seq2	42.7143	-2.96874	0.527455	-5.62842	1.81872e-08	6.65902e-07
gnl|Pdu_trscr_assembly_1|22617	143.475	1.99362	0.354451	5.62452	1.86029e-08	6.80425e-07
comp2138461_c0_seq1	10.5503	-3.45812	0.615005	-5.62291	1.87768e-08	6.86083e-07
gnl|Pdu_trscr_assembly_1|1344	314.119	-1.50874	0.268332	-5.62268	1.88021e-08	6.86306e-07
comp2267522_c0_seq1	452.538	-1.98228	0.352719	-5.61998	1.90976e-08	6.96381e-07
comp2262931_c0_seq2	647.654	-3.90536	0.694949	-5.61963	1.91366e-08	6.97091e-07
comp2267225_c1_seq1	44.3344	2.462	0.438194	5.61851	1.9261e-08	7.00909e-07
comp2269458_c0_seq2	81.3644	-2.66143	0.473807	-5.61711	1.94177e-08	7.0589e-07
comp2276524_c0_seq2	1267.3	-1.12691	0.200627	-5.61693	1.94375e-08	7.05895e-07
comp2273699_c0_seq8	77.3451	-2.25824	0.402103	-5.61607	1.95345e-08	7.08696e-07
gnl|Pdu_trscr_assembly_1|15590	1836.8	3.10794	0.55353	5.61476	1.96831e-08	7.13362e-07
comp2270871_c1_seq12	1438.11	2.59608	0.462414	5.61419	1.97487e-08	7.15016e-07
comp2272478_c0_seq1	109.12	-1.55752	0.277507	-5.61254	1.99377e-08	7.21127e-07
comp2278569_c0_seq1	5661.04	1.52126	0.271067	5.61211	1.99879e-08	7.22212e-07
comp2258907_c0_seq2	113.781	-2.25705	0.40223	-5.61136	2.00748e-08	7.24618e-07
comp2257653_c0_seq2	112.403	2.53799	0.452462	5.60929	2.0316e-08	7.32585e-07
comp2254352_c0_seq3	323.906	-1.54615	0.275735	-5.60737	2.05426e-08	7.4001e-07
comp2278063_c0_seq2	865.765	-1.18745	0.211874	-5.60453	2.08821e-08	7.51482e-07
comp2221435_c0_seq3	932.484	2.47549	0.441753	5.6038	2.09707e-08	7.53221e-07
comp2233319_c0_seq1	18.7491	-2.43746	0.434979	-5.60361	2.09932e-08	7.53221e-07
comp2277455_c0_seq2	221.068	1.60614	0.286626	5.60361	2.09936e-08	7.53221e-07
comp1192792_c0_seq1	33.8019	-3.62597	0.647402	-5.60081	2.13353e-08	7.63656e-07
comp2245053_c0_seq1	141.305	2.70502	0.483009	5.60035	2.13914e-08	7.63656e-07
comp2245788_c0_seq1	173.506	2.10874	0.376523	5.60055	2.13667e-08	7.63656e-07
comp2261098_c0_seq1	50.218	-2.72863	0.487202	-5.60061	2.13601e-08	7.63656e-07
comp2271539_c0_seq2	9304.63	-1.56352	0.279176	-5.60048	2.1376e-08	7.63656e-07
comp2248429_c0_seq1	436.294	1.49654	0.26725	5.59976	2.14655e-08	7.65538e-07
comp2265588_c0_seq1	65.7241	2.41785	0.431914	5.59799	2.16855e-08	7.72612e-07
comp2278120_c2_seq1	1519.44	2.61685	0.46749	5.59767	2.17253e-08	7.73262e-07
comp2254515_c0_seq1	148.879	-2.90945	0.519823	-5.597	2.18088e-08	7.75459e-07
comp2277723_c0_seq7	357.839	2.62603	0.469253	5.59619	2.19118e-08	7.78349e-07
comp2263414_c0_seq1	1419.64	-1.3239	0.236613	-5.59522	2.20341e-08	7.81915e-07
comp2265195_c0_seq3	754.585	-1.44998	0.259172	-5.59465	2.21071e-08	7.83729e-07
comp2246491_c0_seq2	240.345	2.18127	0.389989	5.59317	2.22962e-08	7.89647e-07
comp2267288_c1_seq6	62.0791	-2.46355	0.440667	-5.5905	2.2642e-08	8.01101e-07
comp2259138_c0_seq2	74.3296	-2.46684	0.441459	-5.58791	2.29812e-08	8.10749e-07
comp2267215_c0_seq3	204.09	-1.30742	0.233965	-5.58809	2.29581e-08	8.10749e-07
comp2269539_c0_seq1	68.8378	3.081	0.55137	5.5879	2.29828e-08	8.10749e-07
comp2254382_c0_seq1	55.9297	2.7647	0.49486	5.58683	2.31253e-08	8.14973e-07
comp2272127_c0_seq2	285.138	-1.42031	0.254232	-5.58666	2.31484e-08	8.14982e-07
comp2278030_c0_seq10	3134.45	-1.49681	0.268004	-5.58503	2.33667e-08	8.21858e-07
comp2224691_c1_seq1	8.32368	-3.604	0.645843	-5.58029	2.40113e-08	8.43702e-07
comp2239331_c0_seq1	188.658	-1.47541	0.26446	-5.57896	2.41957e-08	8.49346e-07
comp2274295_c0_seq2	4023.51	2.14483	0.384544	5.57759	2.43879e-08	8.55251e-07
comp2270788_c0_seq7	262.896	-1.70828	0.306321	-5.57674	2.45061e-08	8.58555e-07
comp2260613_c0_seq2	172.72	2.03642	0.365212	5.57599	2.46132e-08	8.6146e-07
comp2276434_c0_seq4	304.835	-1.38344	0.248136	-5.57535	2.47029e-08	8.63755e-07
comp2142789_c0_seq2	183.933	1.8492	0.331747	5.57413	2.48773e-08	8.68586e-07
comp2258854_c0_seq2	69.262	2.28217	0.40944	5.57387	2.4914e-08	8.68586e-07
comp2276930_c1_seq2	590.1	-1.44618	0.25945	-5.57402	2.48925e-08	8.68586e-07
comp2265724_c0_seq2	51.1775	-2.1205	0.38061	-5.57131	2.52835e-08	8.80611e-07
comp2247881_c0_seq1	194.635	1.77135	0.318025	5.56984	2.54967e-08	8.87171e-07
comp2267294_c1_seq1	2063.04	-1.55446	0.279289	-5.56579	2.60973e-08	9.07185e-07
comp2277456_c0_seq1	2550.26	-2.07127	0.37225	-5.56419	2.63374e-08	9.14643e-07
comp2271554_c0_seq2	116.334	-2.57558	0.463059	-5.56209	2.6656e-08	9.24808e-07
comp2268065_c0_seq1	79.2451	-2.39514	0.430674	-5.56137	2.6766e-08	9.27723e-07
comp2270623_c2_seq1	364.192	-1.87206	0.336663	-5.56063	2.68807e-08	9.30795e-07
comp2276798_c2_seq4	1259.65	-1.80944	0.325439	-5.55999	2.69784e-08	9.33275e-07
comp2277301_c0_seq8	860.864	-1.47917	0.266171	-5.55721	2.74126e-08	9.47377e-07
comp2232805_c0_seq1	3237.38	-2.33332	0.419888	-5.557	2.74444e-08	9.47561e-07
comp2261228_c0_seq1	231.27	2.1069	0.379291	5.55483	2.77877e-08	9.58489e-07
comp2252349_c0_seq1	54.8528	-3.14462	0.566196	-5.55393	2.7931e-08	9.62503e-07
comp2256318_c0_seq1	149.174	2.9339	0.528363	5.55281	2.81113e-08	9.67782e-07
comp2259943_c0_seq2	77.6011	-1.61629	0.291179	-5.55082	2.8433e-08	9.77914e-07
comp2246565_c0_seq1	75.6659	2.40294	0.432973	5.54985	2.85912e-08	9.8241e-07
comp2276819_c0_seq1	154.595	1.49094	0.26867	5.54933	2.8676e-08	9.84378e-07
comp2251262_c0_seq1	1001.98	-1.22709	0.221146	-5.54877	2.87694e-08	9.86636e-07
comp2262844_c0_seq2	87.9836	-2.67722	0.482793	-5.54527	2.93496e-08	1.00557e-06
comp2265508_c0_seq15	491.206	1.52262	0.274643	5.54401	2.95618e-08	1.01187e-06
gnl|Pdu_trscr_assembly_1|90137	228.48	1.45854	0.263187	5.54184	2.99315e-08	1.02354e-06
comp2236190_c0_seq1	22.8368	-3.20975	0.579362	-5.54014	3.02234e-08	1.03253e-06
comp2278398_c1_seq3	54.6466	3.0115	0.543653	5.53939	3.0353e-08	1.03597e-06
comp2261386_c0_seq1	505.936	-2.17918	0.393526	-5.53757	3.06691e-08	1.04576e-06
comp2257019_c0_seq1	584.165	-1.2762	0.230585	-5.53461	3.11926e-08	1.0626e-06
comp2262249_c0_seq1	257.779	1.57699	0.284956	5.53416	3.12716e-08	1.06428e-06
comp2270227_c0_seq1	949.208	1.88176	0.340135	5.53239	3.15893e-08	1.07407e-06
comp2279734_c0_seq1	168.447	1.7814	0.322218	5.52855	3.22883e-08	1.09679e-06
comp2262932_c0_seq1	95.0921	2.30271	0.416765	5.52521	3.29089e-08	1.11681e-06
comp2234451_c0_seq4	108.089	-3.24187	0.586843	-5.52425	3.30887e-08	1.12185e-06
comp2277784_c0_seq2	565.924	-1.5394	0.278758	-5.52235	3.3449e-08	1.13299e-06
comp2220452_c1_seq1	338.544	2.562	0.464651	5.51382	3.51123e-08	1.1882e-06
comp2270884_c1_seq1	46.8246	2.61699	0.474667	5.51331	3.5214e-08	1.19051e-06
comp2256950_c0_seq1	27.8948	3.05592	0.554317	5.51294	3.52895e-08	1.19194e-06
comp2278093_c0_seq2	1681.06	-0.983409	0.178476	-5.51004	3.58759e-08	1.2106e-06
comp2269794_c1_seq8	93.1807	1.67571	0.304136	5.50974	3.59368e-08	1.21151e-06
comp2259859_c0_seq1	6321.4	-2.19787	0.398988	-5.50861	3.61681e-08	1.21816e-06
gnl|Pdu_trscr_assembly_1|91767	267.661	1.42901	0.259435	5.50815	3.62632e-08	1.22021e-06
comp2275669_c0_seq15	467.489	1.73955	0.315866	5.50724	3.64511e-08	1.22538e-06
comp2271755_c0_seq2	3533.31	-2.87495	0.522228	-5.50517	3.68818e-08	1.23869e-06
comp2274279_c0_seq3	1118.06	-1.21181	0.22022	-5.50272	3.73966e-08	1.25481e-06
comp2259975_c0_seq2	360.037	-2.24183	0.407638	-5.49957	3.80724e-08	1.27628e-06
comp2199263_c0_seq2	1900.29	2.35597	0.428436	5.49899	3.81974e-08	1.27927e-06
comp2276900_c4_seq3	643.433	-2.18032	0.396683	-5.49639	3.87648e-08	1.29706e-06
comp2261623_c0_seq1	80611.4	2.80948	0.511218	5.49567	3.89229e-08	1.3008e-06
comp2264984_c0_seq1	263.435	2.24772	0.409007	5.49555	3.89495e-08	1.3008e-06
comp2261818_c0_seq3	73.8254	-2.83064	0.51521	-5.49414	3.92623e-08	1.31003e-06
comp2232518_c0_seq1	311.805	-2.37711	0.432698	-5.4937	3.93608e-08	1.31143e-06
comp2262465_c0_seq5	1133.52	3.4165	0.621904	5.49362	3.93778e-08	1.31143e-06
comp2254672_c0_seq1	162.249	-1.67959	0.305857	-5.49141	3.98735e-08	1.3267e-06
comp2274492_c0_seq6	96.9172	2.2818	0.415555	5.49098	3.99716e-08	1.32873e-06
comp2264633_c1_seq2	285.647	1.88472	0.343343	5.48933	4.03472e-08	1.33997e-06
comp2221211_c0_seq1	830.982	2.58491	0.471046	5.4876	4.07428e-08	1.35185e-06
comp2277899_c0_seq2	127.576	-2.14351	0.390724	-5.486	4.11136e-08	1.36289e-06
comp2220394_c0_seq1	1136.51	2.21799	0.404345	5.4854	4.12546e-08	1.3663e-06
comp2276226_c0_seq6	66.6548	-1.47116	0.268247	-5.48436	4.14964e-08	1.37303e-06
comp2252811_c0_seq1	119.016	-1.63379	0.29797	-5.48307	4.17997e-08	1.38179e-06
comp2266728_c0_seq2	86.1867	-1.54814	0.282434	-5.48143	4.21909e-08	1.39343e-06
comp2273196_c0_seq4	445.556	-1.48801	0.271503	-5.48063	4.23804e-08	1.3984e-06
comp2238789_c0_seq1	84.157	-2.47695	0.452018	-5.47976	4.25897e-08	1.40401e-06
comp2262630_c5_seq2	70.3729	-2.1758	0.39711	-5.47908	4.27539e-08	1.40812e-06
comp2190307_c0_seq2	55.8828	2.3672	0.432485	5.47349	4.41258e-08	1.45197e-06
comp2221859_c0_seq1	45.7832	-3.46467	0.63344	-5.46961	4.5102e-08	1.48218e-06
gnl|Pdu_trscr_assembly_1|11033	946.243	1.19048	0.217658	5.46951	4.5127e-08	1.48218e-06
comp2272472_c0_seq5	258.045	-1.69282	0.309565	-5.46837	4.54181e-08	1.48955e-06
comp2272910_c0_seq1	1364.58	-1.76367	0.322525	-5.46831	4.54348e-08	1.48955e-06
comp2272915_c1_seq7	272.404	1.31694	0.240961	5.46538	4.61909e-08	1.51295e-06
comp2263643_c1_seq3	28.5311	-2.3293	0.426321	-5.46373	4.66225e-08	1.52569e-06
comp2267914_c1_seq2	688.365	-2.405	0.440209	-5.46331	4.6733e-08	1.52791e-06
comp2267916_c0_seq1	142.967	-1.84775	0.338243	-5.4628	4.68685e-08	1.53094e-06
gnl|Pdu_trscr_assembly_1|7104	282.099	1.42755	0.261364	5.46191	4.71044e-08	1.53617e-06
comp2263874_c0_seq1	362.97	-2.01263	0.368487	-5.46187	4.71145e-08	1.53617e-06
comp2273112_c0_seq5	66.5344	2.4629	0.45098	5.46121	4.72907e-08	1.54051e-06
comp2271284_c0_seq4	134.282	-2.74314	0.502376	-5.46034	4.75228e-08	1.54666e-06
comp2275540_c0_seq12	1796.2	-1.55165	0.284191	-5.45987	4.76484e-08	1.54933e-06
comp2276171_c4_seq1	456.222	1.91956	0.35163	5.45905	4.7869e-08	1.55509e-06
comp2258942_c0_seq1	526.494	1.26521	0.231916	5.45548	4.8841e-08	1.58523e-06
comp2267341_c0_seq1	2739.44	-1.5207	0.278902	-5.45246	4.96777e-08	1.61092e-06
comp2262667_c1_seq1	237.853	1.88939	0.346556	5.4519	4.9835e-08	1.61455e-06
comp2269062_c0_seq2	449.95	-1.16356	0.2135	-5.44995	5.03838e-08	1.63086e-06
comp2236375_c0_seq1	214.598	2.4734	0.453863	5.44966	5.04652e-08	1.63201e-06
comp2272881_c0_seq1	155.684	-2.17718	0.399681	-5.4473	5.11411e-08	1.65238e-06
comp2142021_c1_seq1	336.318	-2.98614	0.548245	-5.44672	5.1306e-08	1.65621e-06
comp2202319_c1_seq1	82.4835	2.24597	0.41245	5.44544	5.16782e-08	1.66672e-06
comp2248226_c3_seq1	9608.1	-1.72415	0.316638	-5.44519	5.17501e-08	1.66753e-06
comp2218579_c0_seq1	16.2675	-2.56535	0.471173	-5.44459	5.19248e-08	1.67165e-06
comp2253859_c0_seq1	86.0142	1.99786	0.367269	5.43976	5.33532e-08	1.71609e-06
comp2267342_c0_seq3	23.3973	2.52543	0.464308	5.43911	5.35462e-08	1.72054e-06
comp2272658_c2_seq1	48.3096	2.89345	0.531984	5.43898	5.35877e-08	1.72054e-06
comp2266864_c0_seq1	400.729	-2.13852	0.393219	-5.4385	5.37316e-08	1.72361e-06
comp2275176_c2_seq4	127.168	-1.61132	0.296411	-5.43611	5.44573e-08	1.74532e-06
comp2275941_c0_seq9	2890.31	-1.56499	0.287925	-5.43542	5.46687e-08	1.75052e-06
gnl|Pdu_trscr_assembly_1|7688	136.679	-2.41548	0.444658	-5.43223	5.56541e-08	1.78048e-06
comp2270870_c0_seq1	490.783	1.97851	0.364342	5.43036	5.62411e-08	1.79765e-06
comp2219624_c0_seq2	43.0355	-2.67044	0.491857	-5.4293	5.65747e-08	1.8067e-06
comp2198075_c0_seq1	54.1216	-2.22883	0.410617	-5.42802	5.69842e-08	1.81815e-06
comp2140238_c0_seq1	1524.65	-1.34545	0.24805	-5.4241	5.82459e-08	1.85675e-06
comp2249798_c1_seq1	125.342	-2.17092	0.40067	-5.41822	6.0197e-08	1.91238e-06
comp2257556_c0_seq4	273.835	2.36147	0.435841	5.41819	6.0205e-08	1.91238e-06
comp2272691_c0_seq4	99335.4	2.35757	0.435096	5.41851	6.00976e-08	1.91238e-06
comp2276447_c2_seq8	2533.75	1.49331	0.275607	5.41826	6.01823e-08	1.91238e-06
comp2265924_c0_seq3	272.318	-2.65954	0.490901	-5.41767	6.03808e-08	1.91626e-06
comp2239040_c0_seq1	116.282	2.06123	0.380568	5.41619	6.08829e-08	1.93048e-06
comp2276636_c0_seq3	418.783	-1.69317	0.312658	-5.4154	6.11511e-08	1.93727e-06
comp2274474_c0_seq5	2885.6	1.40004	0.258639	5.41312	6.19377e-08	1.96045e-06
comp2267270_c0_seq1	64.7961	-2.08661	0.385592	-5.41144	6.25199e-08	1.97712e-06
comp2259442_c1_seq3	18.1172	-2.46945	0.456658	-5.40765	6.38554e-08	2.01746e-06
comp2260998_c0_seq3	74.1752	-2.40142	0.44409	-5.40751	6.39084e-08	2.01746e-06
comp2264599_c0_seq1	480.46	-1.64106	0.303526	-5.40665	6.42137e-08	2.02531e-06
comp2260132_c0_seq1	29.5802	2.74547	0.508113	5.40326	6.54417e-08	2.0604e-06
comp2266634_c0_seq1	56.8806	2.94878	0.545733	5.40334	6.54119e-08	2.0604e-06
comp2278597_c0_seq3	1552.49	2.0819	0.385573	5.3995	6.68274e-08	2.10218e-06
comp2275101_c0_seq4	740.792	-2.1813	0.404045	-5.39866	6.71422e-08	2.11023e-06
comp2276461_c0_seq7	521.785	2.26313	0.419222	5.39841	6.72344e-08	2.11127e-06
comp2272761_c1_seq3	773.842	2.65934	0.492782	5.39659	6.7921e-08	2.13095e-06
comp2237007_c0_seq2	133.232	-2.12729	0.394272	-5.39549	6.83358e-08	2.13951e-06
comp2273870_c0_seq3	208.21	1.62676	0.301509	5.39539	6.83732e-08	2.13951e-06
comp2275569_c0_seq2	466.002	-2.90611	0.538623	-5.39545	6.83537e-08	2.13951e-06
comp2263854_c0_seq1	525.573	-2.3656	0.438792	-5.39116	7.00054e-08	2.18866e-06
gnl|Pdu_trscr_assembly_1|9334	5209.1	1.77326	0.328954	5.3906	7.02238e-08	2.18975e-06
comp2274190_c0_seq1	2399.26	-2.04596	0.379534	-5.39071	7.01793e-08	2.18975e-06
comp2278539_c0_seq2	52782.1	1.39927	0.259561	5.3909	7.01065e-08	2.18975e-06
comp1971890_c0_seq1	69.8321	2.46984	0.458342	5.38864	7.09935e-08	2.21181e-06
comp2267007_c0_seq1	1491.92	-1.77582	0.329613	-5.38759	7.14091e-08	2.22089e-06
comp2276146_c0_seq2	1531.51	1.38469	0.257014	5.38761	7.14026e-08	2.22089e-06
comp2269767_c0_seq1	188.857	1.9339	0.358996	5.38697	7.16552e-08	2.22661e-06
comp2257429_c0_seq1	156.161	1.87853	0.348857	5.38482	7.25158e-08	2.25139e-06
comp2138945_c0_seq1	72.8142	-2.29501	0.426314	-5.38338	7.31015e-08	2.26761e-06
comp2274511_c1_seq2	1295.73	-1.562	0.290178	-5.38289	7.3298e-08	2.27173e-06
comp2261491_c0_seq1	3493.88	2.59357	0.481885	5.38214	7.36058e-08	2.27929e-06
comp2274018_c0_seq2	404.858	-1.84642	0.343076	-5.38196	7.3678e-08	2.27955e-06
gnl|Pdu_trscr_assembly_1|7133	231.585	-1.46038	0.271404	-5.38082	7.4147e-08	2.29208e-06
comp2266497_c1_seq2	99.7834	-1.74492	0.324302	-5.38056	7.42565e-08	2.29348e-06
comp2257131_c0_seq2	1185.46	-1.95722	0.363806	-5.37983	7.45547e-08	2.3007e-06
comp2215664_c1_seq1	93.9681	-1.75706	0.326708	-5.37808	7.52833e-08	2.32118e-06
comp2254887_c0_seq1	13.9929	-3.31518	0.616705	-5.37564	7.63128e-08	2.35089e-06
comp2275800_c0_seq2	2869.59	1.88511	0.350921	5.3719	7.79109e-08	2.39806e-06
comp2224014_c0_seq1	4650.75	-1.57201	0.293043	-5.36444	8.12e-08	2.49714e-06
comp2267797_c1_seq1	136.356	2.26588	0.422423	5.36399	8.1403e-08	2.50123e-06
comp2139772_c0_seq1	303.148	2.69281	0.502081	5.3633	8.17134e-08	2.50861e-06
comp2265381_c0_seq1	182.698	-1.56395	0.291721	-5.36112	8.27098e-08	2.53702e-06
comp2269109_c0_seq7	119.102	1.81312	0.338331	5.35901	8.36802e-08	2.56459e-06
comp2262204_c0_seq1	625.511	1.5958	0.297907	5.35669	8.47593e-08	2.59543e-06
comp2254477_c0_seq1	540.146	-1.29934	0.242608	-5.35571	8.52207e-08	2.60733e-06
comp2249062_c0_seq1	1351.89	2.01774	0.376858	5.35412	8.59747e-08	2.62815e-06
comp2267475_c0_seq6	2207.93	-1.5912	0.297226	-5.35351	8.62652e-08	2.63477e-06
comp2276029_c0_seq1	756.443	-2.38581	0.44569	-5.35307	8.64758e-08	2.63895e-06
comp2275107_c0_seq4	3642.38	2.19481	0.410056	5.35246	8.67671e-08	2.64558e-06
comp2265493_c0_seq1	3737.8	1.19433	0.223158	5.35194	8.70163e-08	2.65092e-06
comp2252790_c0_seq1	4782.69	2.78909	0.521278	5.35048	8.77193e-08	2.67006e-06
comp2251791_c0_seq2	430.434	2.5709	0.480546	5.34996	8.79723e-08	2.67548e-06
comp2262354_c0_seq1	809.578	-1.38893	0.259662	-5.349	8.8441e-08	2.68745e-06
comp2254625_c0_seq1	244.542	-1.48912	0.278553	-5.34589	8.99736e-08	2.7317e-06
comp2220677_c0_seq1	681.623	-3.03287	0.567368	-5.34551	9.01644e-08	2.73285e-06
comp2277927_c4_seq1	214.24	2.2953	0.429385	5.34556	9.01376e-08	2.73285e-06
comp2235681_c0_seq1	916.533	-1.60622	0.300625	-5.34294	9.1452e-08	2.76952e-06
comp2239091_c1_seq1	46.4352	3.03296	0.56777	5.34188	9.19858e-08	2.78333e-06
comp2268847_c0_seq1	61.4328	-2.41536	0.45232	-5.33994	9.29761e-08	2.81092e-06
comp2250842_c0_seq2	70.237	-2.47879	0.464354	-5.33815	9.38986e-08	2.8364e-06
comp2266805_c0_seq1	46.0009	2.73599	0.512863	5.33474	9.56826e-08	2.88785e-06
comp2265682_c0_seq1	43.257	-3.24446	0.608305	-5.3336	9.62824e-08	2.9035e-06
comp2252205_c0_seq1	340.307	-2.17821	0.408417	-5.33329	9.64468e-08	2.90601e-06
gnl|Pdu_trscr_assembly_1|945	98.1613	2.18349	0.409456	5.33266	9.67836e-08	2.91125e-06
comp2258798_c0_seq1	44.128	-2.34122	0.439021	-5.33281	9.67066e-08	2.91125e-06
comp2275131_c0_seq6	516.188	-1.77438	0.332775	-5.33209	9.7089e-08	2.91798e-06
comp2274615_c2_seq13	116.2	-2.19225	0.411214	-5.33116	9.75847e-08	2.93041e-06
comp2275894_c0_seq1	549.713	-1.48987	0.279517	-5.33018	9.81162e-08	2.9439e-06
comp2266434_c0_seq2	187.229	-1.75804	0.329854	-5.32974	9.8352e-08	2.9485e-06
comp1316571_c0_seq1	1373.56	-1.50197	0.281853	-5.32891	9.88034e-08	2.9552e-06
comp2221143_c1_seq5	14.341	-3.72564	0.699142	-5.32887	9.88235e-08	2.9552e-06
comp2224794_c0_seq1	36.9826	-2.06363	0.387234	-5.32915	9.86727e-08	2.9552e-06
comp2274308_c0_seq1	252.314	2.59369	0.486756	5.32851	9.90196e-08	2.95858e-06
comp2234777_c0_seq2	36.3632	-3.23136	0.606452	-5.32829	9.91399e-08	2.9597e-06
comp2276771_c1_seq1	1453.08	-1.49745	0.281179	-5.3256	1.00622e-07	3.00144e-06
comp2107458_c0_seq1	96.4958	-2.53632	0.476379	-5.32417	1.01417e-07	3.02262e-06
comp2243025_c0_seq2	1108.27	1.54715	0.290735	5.3215	1.02916e-07	3.06156e-06
comp2249979_c0_seq1	60.5522	2.01087	0.377885	5.32139	1.0298e-07	3.06156e-06
comp2264981_c1_seq2	46.2911	2.23456	0.419919	5.32141	1.02967e-07	3.06156e-06
comp2264000_c1_seq2	191.669	-1.63773	0.307838	-5.3201	1.03712e-07	3.08076e-06
comp2257509_c0_seq1	96.1136	1.91945	0.36083	5.31955	1.04022e-07	3.08602e-06
comp2271735_c0_seq3	333.924	-2.2777	0.428181	-5.31948	1.04062e-07	3.08602e-06
comp2275797_c0_seq1	560.103	1.34614	0.253072	5.31922	1.04213e-07	3.08794e-06
comp2269912_c0_seq6	262.985	1.51861	0.285551	5.31816	1.04824e-07	3.10347e-06
comp2270901_c0_seq1	43.9221	2.82545	0.531314	5.31784	1.05004e-07	3.10367e-06
comp2277144_c0_seq3	608.359	-1.66608	0.313295	-5.31793	1.04956e-07	3.10367e-06
comp2275926_c0_seq2	499.969	2.08873	0.392888	5.31634	1.05872e-07	3.12674e-06
comp2278201_c1_seq1	476.508	-2.19614	0.41333	-5.31328	1.07671e-07	3.17723e-06
comp2255482_c0_seq1	38.2605	-3.28858	0.619111	-5.31178	1.08561e-07	3.19821e-06
comp2256930_c1_seq1	72.6428	2.11888	0.398894	5.31188	1.08498e-07	3.19821e-06
comp2274497_c0_seq1	200.575	2.22103	0.418146	5.31162	1.08654e-07	3.19832e-06
gnl|Pdu_trscr_assembly_1|16880	1743.41	-2.56171	0.482413	-5.31021	1.095e-07	3.22058e-06
comp2269058_c0_seq1	88.4852	2.06916	0.389682	5.30987	1.09705e-07	3.22394e-06
comp2248643_c1_seq1	310.226	-2.87837	0.542159	-5.30908	1.10179e-07	3.23254e-06
comp2266781_c0_seq2	214.09	2.86235	0.53913	5.3092	1.10106e-07	3.23254e-06
comp2261530_c0_seq2	77.4657	-1.73465	0.326815	-5.30775	1.10987e-07	3.25358e-06
comp2273352_c0_seq2	2867.94	0.773033	0.145668	5.30681	1.11562e-07	3.26776e-06
comp2259097_c0_seq2	73.7075	2.48858	0.468963	5.30656	1.11713e-07	3.2695e-06
comp2267166_c0_seq2	602.211	-1.99632	0.376262	-5.30565	1.1227e-07	3.28311e-06
comp2225054_c0_seq1	13.7189	-2.66408	0.502205	-5.30476	1.12822e-07	3.29657e-06
comp2267886_c0_seq2	52.5589	2.58038	0.486563	5.30327	1.13748e-07	3.3209e-06
gnl|Pdu_trscr_assembly_1|3867	14157.6	1.99773	0.376753	5.30249	1.14235e-07	3.3324e-06
comp2249361_c0_seq2	78.9927	2.59571	0.489704	5.30057	1.15443e-07	3.36425e-06
comp2266482_c0_seq1	949.099	-1.75006	0.330171	-5.30045	1.15515e-07	3.36425e-06
comp2264191_c0_seq1	1781.01	-1.34294	0.253415	-5.29935	1.16213e-07	3.37907e-06
comp2271361_c0_seq4	213.984	-1.92321	0.362907	-5.29946	1.16144e-07	3.37907e-06
comp2223620_c0_seq1	62.8852	-2.94454	0.555794	-5.29791	1.17139e-07	3.40322e-06
comp2250960_c0_seq4	14.4852	-3.02209	0.570494	-5.29732	1.17514e-07	3.41135e-06
comp2266429_c0_seq6	479.134	-1.28265	0.242262	-5.29449	1.19346e-07	3.46172e-06
comp2245442_c0_seq1	26.834	-2.33891	0.441867	-5.29324	1.20169e-07	3.48275e-06
comp2239961_c0_seq1	198.61	1.63108	0.308228	5.29181	1.2111e-07	3.50151e-06
comp2260298_c0_seq1	874.42	-1.01833	0.19243	-5.29194	1.21026e-07	3.50151e-06
comp2268304_c1_seq2	1416.39	-0.91691	0.173266	-5.29192	1.21042e-07	3.50151e-06
comp2261996_c0_seq2	457.853	2.53282	0.478805	5.28988	1.22394e-07	3.53577e-06
comp2272875_c0_seq1	199.708	-1.65917	0.313704	-5.28895	1.23018e-07	3.55092e-06
comp2207445_c0_seq1	22.5343	2.9227	0.552692	5.28813	1.23577e-07	3.56417e-06
comp2266652_c1_seq5	32.7349	-3.14797	0.595613	-5.28526	1.25528e-07	3.61755e-06
comp2232773_c0_seq1	125.597	1.44229	0.272992	5.28326	1.26909e-07	3.65437e-06
comp2097010_c0_seq1	756.634	-1.52642	0.288973	-5.28223	1.27618e-07	3.67183e-06
comp1376985_c0_seq1	10.9944	-2.8359	0.537018	-5.28083	1.28603e-07	3.69721e-06
comp2262438_c0_seq2	247.371	-1.71962	0.325678	-5.28011	1.29104e-07	3.70864e-06
comp2247108_c0_seq2	19.1285	-2.90111	0.549615	-5.27843	1.30297e-07	3.73988e-06
comp2276707_c0_seq1	846.55	-1.96895	0.373129	-5.27685	1.31425e-07	3.76924e-06
comp2270768_c0_seq1	1801.9	-1.11618	0.211555	-5.27607	1.31987e-07	3.78233e-06
comp2271186_c0_seq2	2432.39	1.79215	0.339699	5.27571	1.32246e-07	3.78671e-06
comp2269422_c0_seq3	1008.49	-1.11719	0.21179	-5.27497	1.32776e-07	3.79884e-06
comp2264330_c2_seq2	79.5626	2.49969	0.47395	5.27417	1.33361e-07	3.81253e-06
comp2257617_c0_seq6	757.529	-2.42274	0.459446	-5.27318	1.34077e-07	3.82993e-06
comp2272717_c0_seq1	107.619	1.97188	0.374003	5.27236	1.34679e-07	3.84404e-06
comp2265656_c0_seq3	4408.53	2.19648	0.416624	5.2721	1.34872e-07	3.84648e-06
comp2232787_c0_seq1	83.98	1.69832	0.322194	5.27111	1.35598e-07	3.8641e-06
comp2275773_c0_seq15	330.532	-1.54051	0.292324	-5.26987	1.36523e-07	3.88737e-06
comp2271444_c1_seq4	9046.23	1.84811	0.350808	5.26815	1.37807e-07	3.92081e-06
comp2255197_c0_seq1	21.6024	2.95385	0.560944	5.26585	1.3954e-07	3.96697e-06
comp2138151_c1_seq1	76.9177	-2.15685	0.409643	-5.26518	1.40051e-07	3.96898e-06
comp2250341_c0_seq1	180.862	1.45673	0.27665	5.26561	1.39726e-07	3.96898e-06
comp2255158_c0_seq2	34.4029	2.8829	0.547541	5.26518	1.40056e-07	3.96898e-06
comp2264500_c0_seq3	537.414	-1.44799	0.275005	-5.26532	1.39943e-07	3.96898e-06
comp2277656_c1_seq1	373.152	2.69133	0.511218	5.26454	1.40543e-07	3.97965e-06
comp2262000_c0_seq2	179.462	-1.96543	0.373386	-5.26379	1.41116e-07	3.99041e-06
comp2270332_c0_seq1	37.7182	2.60582	0.49505	5.26375	1.41147e-07	3.99041e-06
comp2245616_c0_seq2	52.8736	-2.39842	0.455667	-5.26354	1.41308e-07	3.99182e-06
comp2277030_c1_seq3	72.462	1.9681	0.373931	5.26327	1.41517e-07	3.99456e-06
comp2272695_c2_seq7	187.328	-1.60337	0.304715	-5.26188	1.42593e-07	4.02176e-06
comp2266368_c0_seq1	443.78	-1.73401	0.329552	-5.26173	1.42708e-07	4.02181e-06
comp2259351_c0_seq1	162.895	1.39707	0.26555	5.26106	1.43225e-07	4.03321e-06
comp2239691_c0_seq1	15900.3	2.46205	0.46811	5.25955	1.44405e-07	4.06323e-06
comp2235003_c0_seq2	154.451	-2.53259	0.481626	-5.25842	1.45298e-07	4.08514e-06
comp2276143_c0_seq2	303.284	2.94759	0.560567	5.25824	1.45442e-07	4.08598e-06
gnl|Pdu_trscr_assembly_1|15716	41.8497	2.3325	0.443707	5.25684	1.46549e-07	4.11385e-06
comp2273325_c0_seq2	459.342	-1.63383	0.310843	-5.25615	1.47105e-07	4.12623e-06
comp2271913_c0_seq11	1539.27	2.02524	0.385324	5.25593	1.47279e-07	4.12786e-06
comp2273472_c0_seq1	503.156	-2.05173	0.390567	-5.2532	1.49477e-07	4.18618e-06
comp2140763_c0_seq1	992.152	-1.34753	0.256619	-5.2511	1.51192e-07	4.22758e-06
comp2261441_c0_seq1	17.0958	-2.84376	0.541546	-5.25119	1.51123e-07	4.22758e-06
comp2231128_c0_seq2	24.4521	-2.55909	0.487362	-5.25092	1.51345e-07	4.22855e-06
comp2259418_c0_seq1	191.57	1.55264	0.295862	5.24785	1.53882e-07	4.29607e-06
comp2262819_c0_seq1	84.4396	1.76313	0.336017	5.24714	1.54482e-07	4.30945e-06
comp2254308_c0_seq1	357.422	-2.25314	0.429601	-5.24472	1.56518e-07	4.36043e-06
comp2274655_c0_seq2	1455.33	-1.41788	0.270347	-5.24468	1.56553e-07	4.36043e-06
comp2264956_c0_seq1	288.485	2.01849	0.38507	5.24189	1.58939e-07	4.42342e-06
comp2267190_c1_seq5	127.352	2.43693	0.464988	5.24085	1.59838e-07	4.445e-06
comp2261237_c0_seq1	186.086	2.66884	0.509394	5.23925	1.6123e-07	4.47672e-06
comp2268651_c0_seq1	816.279	1.40234	0.267655	5.23935	1.61145e-07	4.47672e-06
comp2275233_c0_seq4	175.838	1.48126	0.282748	5.23879	1.61629e-07	4.48433e-06
comp2274571_c0_seq3	1549.98	-1.84023	0.351487	-5.23555	1.64494e-07	4.56028e-06
comp1970723_c0_seq1	1943.31	1.25009	0.238834	5.23415	1.65745e-07	4.5914e-06
comp1547345_c0_seq1	44.3973	-3.08054	0.588576	-5.23389	1.65983e-07	4.59444e-06
comp2258573_c0_seq1	24.6383	-2.36133	0.451209	-5.23333	1.6648e-07	4.60461e-06
comp2277588_c0_seq3	324.029	-1.42523	0.272545	-5.22933	1.7013e-07	4.70193e-06
comp2248445_c0_seq1	69.8287	1.71283	0.327619	5.22813	1.71233e-07	4.72876e-06
comp2272968_c0_seq3	98.7498	2.83604	0.542832	5.22453	1.74595e-07	4.81789e-06
comp2278048_c0_seq4	950.334	-2.27784	0.436045	-5.22387	1.75224e-07	4.83151e-06
comp2276042_c0_seq1	277.051	-2.03103	0.388849	-5.22317	1.75883e-07	4.84595e-06
comp2269305_c0_seq1	2884.73	0.97357	0.186424	5.22236	1.76658e-07	4.86354e-06
comp2249778_c0_seq2	56.3039	-2.1939	0.420165	-5.22152	1.77457e-07	4.88178e-06
comp2264020_c0_seq1	357.613	1.9714	0.377565	5.22136	1.77615e-07	4.88237e-06
comp2273758_c0_seq1	2373.68	-1.80989	0.3468	-5.21881	1.80072e-07	4.9461e-06
comp2258030_c0_seq2	802.04	-1.14514	0.219642	-5.21364	1.85166e-07	5.08211e-06
comp2277745_c0_seq2	868.799	1.23088	0.236113	5.21312	1.85695e-07	5.09273e-06
comp2216167_c0_seq4	1699.25	-1.67361	0.321093	-5.21221	1.86602e-07	5.10585e-06
comp2261723_c0_seq1	1028.63	-2.40329	0.461075	-5.21235	1.86462e-07	5.10585e-06
comp2273721_c0_seq12	213.083	1.73874	0.333576	5.21243	1.86384e-07	5.10585e-06
comp2261200_c0_seq2	340.099	-1.32011	0.25328	-5.21206	1.86755e-07	5.1061e-06
comp2220039_c0_seq1	313.981	-1.66778	0.320243	-5.20785	1.91046e-07	5.21943e-06
comp2273767_c0_seq1	424.855	1.78285	0.342363	5.20749	1.91407e-07	5.22532e-06
comp2242993_c0_seq2	537.294	-2.30999	0.443627	-5.20706	1.91861e-07	5.2337e-06
comp2234658_c0_seq1	29.1251	-2.07107	0.397828	-5.20593	1.93027e-07	5.25347e-06
comp2269324_c0_seq1	2582.34	-1.25345	0.240764	-5.20614	1.92806e-07	5.25347e-06
comp2276176_c0_seq4	1541.92	-2.51788	0.483653	-5.20597	1.92984e-07	5.25347e-06
comp2270588_c0_seq2	1555.52	-1.42172	0.273163	-5.20465	1.94365e-07	5.28588e-06
comp2267710_c0_seq1	87.2464	3.21097	0.617267	5.20192	1.97238e-07	5.35992e-06
comp2251023_c0_seq1	327.374	-1.16128	0.223283	-5.20094	1.98284e-07	5.38425e-06
comp2269089_c0_seq6	194.752	-1.53856	0.296107	-5.19597	2.03656e-07	5.52593e-06
gnl|Pdu_trscr_assembly_1|10869	2598.9	-1.63845	0.315453	-5.19396	2.05865e-07	5.58163e-06
comp2263713_c0_seq2	1005.04	1.53695	0.295984	5.19266	2.07308e-07	5.61649e-06
comp2277924_c1_seq2	1056.66	-1.96321	0.378093	-5.1924	2.07597e-07	5.62006e-06
comp2275494_c0_seq2	11313.3	-1.77697	0.342242	-5.19216	2.07868e-07	5.62313e-06
comp2268286_c1_seq1	259.899	-1.34516	0.259187	-5.18991	2.10392e-07	5.68582e-06
comp2269350_c0_seq2	115.427	1.7501	0.337218	5.18981	2.10503e-07	5.68582e-06
comp2263669_c0_seq5	444.118	-2.07089	0.399048	-5.18957	2.10784e-07	5.68909e-06
comp2269153_c0_seq4	196.104	-1.41054	0.271882	-5.18806	2.12495e-07	5.73094e-06
comp2269908_c0_seq1	131.177	-2.72602	0.525717	-5.18533	2.15628e-07	5.81105e-06
comp2221142_c0_seq1	2871.61	2.38348	0.459895	5.18267	2.18737e-07	5.89042e-06
comp2258894_c1_seq1	17.3041	-2.50584	0.483572	-5.18193	2.19598e-07	5.90914e-06
comp2278151_c0_seq4	727.104	-1.33558	0.257759	-5.18151	2.20098e-07	5.91812e-06
comp2269506_c0_seq28	1326.88	-1.80331	0.348048	-5.18121	2.20447e-07	5.92307e-06
comp2261591_c0_seq1	78.8983	-2.42015	0.467265	-5.17939	2.22616e-07	5.97685e-06
comp2253273_c0_seq1	384.633	2.29306	0.442984	5.17639	2.2622e-07	6.06906e-06
comp2257631_c0_seq1	71.5072	-1.9635	0.379381	-5.17552	2.27275e-07	6.09279e-06
comp2253903_c0_seq1	313.111	2.59889	0.502312	5.17385	2.29314e-07	6.14284e-06
comp1847822_c0_seq1	24.61	-2.97047	0.574186	-5.17337	2.29911e-07	6.14348e-06
comp2229846_c0_seq1	713.188	-3.16103	0.610991	-5.17362	2.29607e-07	6.14348e-06
comp2264274_c0_seq1	273.086	-1.59339	0.307988	-5.17353	2.29709e-07	6.14348e-06
comp2273277_c0_seq1	1023.75	-1.75185	0.338634	-5.17328	2.30026e-07	6.14348e-06
comp1195550_c0_seq2	18.4161	-2.71247	0.524389	-5.17263	2.30826e-07	6.16024e-06
comp2274951_c0_seq5	164.522	1.85388	0.358567	5.17025	2.33787e-07	6.2346e-06
comp2264954_c0_seq1	15.8273	-2.63843	0.510456	-5.16878	2.35628e-07	6.27901e-06
comp2269675_c1_seq8	641.734	1.5354	0.297099	5.16798	2.36633e-07	6.30111e-06
comp2266989_c0_seq3	581.815	1.73501	0.335852	5.16601	2.3915e-07	6.36339e-06
comp2277062_c1_seq2	138.755	-2.89327	0.560093	-5.16569	2.39548e-07	6.36922e-06
comp2270915_c0_seq1	246.36	1.56151	0.302322	5.16506	2.4036e-07	6.38607e-06
comp1323964_c0_seq1	773.875	-0.915209	0.17721	-5.16455	2.41014e-07	6.3987e-06
comp2278099_c1_seq2	1787.74	1.23218	0.238671	5.16268	2.43441e-07	6.45832e-06
comp2235205_c0_seq1	31.296	-2.16958	0.420302	-5.16196	2.44373e-07	6.47824e-06
gnl|Pdu_trscr_assembly_1|7327	1073.17	1.14148	0.221273	5.15868	2.48698e-07	6.588e-06
comp2266525_c1_seq2	60.2198	-2.18043	0.422709	-5.15824	2.49283e-07	6.59861e-06
comp2198530_c0_seq1	53.9986	-1.97355	0.382758	-5.15613	2.52112e-07	6.66856e-06
comp2268776_c0_seq3	447.934	1.53515	0.297818	5.15467	2.54072e-07	6.71544e-06
comp2270534_c0_seq1	748.581	-1.7545	0.340483	-5.15297	2.56399e-07	6.77194e-06
comp2266348_c0_seq1	81.9396	-2.29256	0.445337	-5.14792	2.63394e-07	6.95153e-06
comp2248164_c0_seq1	303.128	-1.63458	0.317535	-5.1477	2.63702e-07	6.95454e-06
comp2253278_c0_seq3	308.15	1.52017	0.295352	5.14698	2.64711e-07	6.976e-06
comp2276278_c0_seq2	500.765	1.15411	0.224248	5.1466	2.65254e-07	6.98514e-06
comp2257938_c0_seq6	137.962	-1.66249	0.323043	-5.14634	2.65612e-07	6.98943e-06
comp2245360_c2_seq1	21.1162	-3.03998	0.590788	-5.14564	2.66606e-07	7.01044e-06
comp2088138_c0_seq1	30.1518	-2.69842	0.524431	-5.14543	2.66912e-07	7.0133e-06
comp2260080_c0_seq1	12252.9	-1.57147	0.305544	-5.1432	2.70101e-07	7.09188e-06
comp1953996_c0_seq1	349.172	1.6	0.311273	5.1402	2.74452e-07	7.20085e-06
comp2277261_c0_seq8	101.103	-1.63532	0.318159	-5.13993	2.74836e-07	7.20562e-06
comp2259749_c0_seq5	128.986	1.87805	0.365744	5.13489	2.82315e-07	7.39629e-06
comp2273614_c0_seq1	44.0896	-2.73398	0.532453	-5.13469	2.82615e-07	7.39872e-06
comp2270100_c0_seq3	878.518	-1.68488	0.328176	-5.13407	2.83539e-07	7.41747e-06
comp2210600_c0_seq1	40.7126	-3.49026	0.679957	-5.13306	2.8507e-07	7.45206e-06
comp2238763_c0_seq1	11.5173	-3.37633	0.65804	-5.13089	2.88372e-07	7.53288e-06
comp2210246_c0_seq1	21.1084	2.77713	0.541287	5.13061	2.88802e-07	7.53351e-06
comp2276102_c0_seq8	138.346	-2.02945	0.395558	-5.1306	2.88818e-07	7.53351e-06
comp2270216_c0_seq10	570.685	-2.48462	0.484378	-5.1295	2.90509e-07	7.5721e-06
comp2246807_c0_seq1	29.8251	-2.2477	0.43837	-5.1274	2.93769e-07	7.65147e-06
comp2216126_c0_seq1	197.871	1.45026	0.282864	5.12706	2.94299e-07	7.65813e-06
comp2268231_c0_seq2	109.463	-1.69468	0.330542	-5.12696	2.94453e-07	7.65813e-06
comp2256469_c0_seq1	27.1748	2.96022	0.577407	5.12676	2.94775e-07	7.66094e-06
comp2231865_c0_seq1	63.3182	-2.38493	0.465264	-5.12597	2.96013e-07	7.68751e-06
comp2241517_c0_seq3	853.525	-1.48777	0.290284	-5.1252	2.97224e-07	7.70776e-06
comp2253037_c0_seq10	164.009	2.72715	0.532094	5.12532	2.97031e-07	7.70776e-06
comp2271799_c0_seq3	140.151	-2.60602	0.508669	-5.12321	3.0037e-07	7.7837e-06
comp2275636_c0_seq4	193.467	2.43868	0.476221	5.12091	3.04068e-07	7.87382e-06
gnl|Pdu_trscr_assembly_1|15033	817.718	-0.998781	0.195137	-5.11837	3.08195e-07	7.97491e-06
comp2269671_c0_seq2	12662.4	-1.92207	0.375615	-5.11712	3.10241e-07	8.02205e-06
comp2209542_c0_seq2	373.881	-2.12768	0.415874	-5.11618	3.11788e-07	8.05622e-06
comp2105772_c0_seq1	301.79	-2.12078	0.414546	-5.11589	3.12257e-07	8.05669e-06
comp2259053_c0_seq4	71.9323	1.82496	0.35672	5.11594	3.12188e-07	8.05669e-06
comp2264860_c0_seq2	157.83	1.63162	0.318943	5.11572	3.12551e-07	8.05845e-06
comp2260953_c0_seq2	1448.91	1.42716	0.27918	5.11196	3.18834e-07	8.21453e-06
comp2267162_c0_seq2	425.477	-1.97471	0.386303	-5.11181	3.19084e-07	8.21503e-06
comp2268445_c0_seq3	268.733	2.6784	0.524023	5.11122	3.2008e-07	8.23475e-06
comp2263727_c0_seq5	75.6354	-1.91653	0.375091	-5.10949	3.23025e-07	8.30453e-06
comp2235322_c0_seq1	186.734	2.45351	0.480202	5.10932	3.23319e-07	8.30612e-06
comp2264707_c0_seq1	166.543	-2.15159	0.421126	-5.10914	3.23634e-07	8.30823e-06
comp2227117_c0_seq2	1085.42	0.998215	0.195485	5.10634	3.28454e-07	8.41684e-06
comp2271574_c0_seq2	119.466	-1.94501	0.380907	-5.10628	3.28571e-07	8.41684e-06
comp2273039_c1_seq1	913.014	-1.75267	0.343234	-5.10635	3.28445e-07	8.41684e-06
comp2267040_c0_seq2	465.384	-2.48209	0.486538	-5.10153	3.36924e-07	8.62463e-06
comp2253402_c0_seq1	185.434	1.32211	0.259219	5.10035	3.3903e-07	8.67232e-06
comp2256287_c0_seq1	436.409	-2.35309	0.46145	-5.09935	3.40828e-07	8.71207e-06
comp2272396_c0_seq2	936.634	-1.79965	0.352957	-5.09878	3.41847e-07	8.73189e-06
comp2273149_c0_seq6	2045.69	-1.73825	0.340956	-5.09817	3.4295e-07	8.7538e-06
comp2252814_c0_seq1	40.2286	2.58401	0.506893	5.09774	3.43735e-07	8.76756e-06
comp2263828_c0_seq2	77.7139	2.96447	0.581747	5.09581	3.47251e-07	8.85094e-06
comp2265538_c0_seq7	29.5547	2.5167	0.493983	5.09471	3.49271e-07	8.89608e-06
comp2237419_c0_seq1	78.1676	2.05343	0.403086	5.09428	3.50075e-07	8.9102e-06
comp2225718_c0_seq1	40.8574	2.59273	0.509178	5.09199	3.5433e-07	9.01209e-06
comp2237006_c0_seq2	70.8316	3.10474	0.610317	5.0871	3.63574e-07	9.22846e-06
comp2251957_c0_seq1	71.9732	-2.37779	0.46741	-5.08716	3.6346e-07	9.22846e-06
comp2270868_c0_seq2	294.075	3.00619	0.590945	5.08708	3.63612e-07	9.22846e-06
comp2252365_c0_seq1	55.0803	-2.76023	0.542634	-5.08673	3.64296e-07	9.23927e-06
comp2275312_c0_seq8	27070	2.67008	0.525069	5.0852	3.67248e-07	9.30751e-06
comp2259227_c0_seq1	5723.37	1.74357	0.343003	5.08325	3.71022e-07	9.39651e-06
comp2276386_c0_seq1	4991.37	-1.69426	0.333323	-5.08294	3.71628e-07	9.40518e-06
comp2273470_c0_seq2	368.689	-2.00207	0.393951	-5.08204	3.73405e-07	9.44346e-06
comp2254630_c0_seq2	4700.01	-2.2187	0.436618	-5.08155	3.74359e-07	9.46091e-06
comp2269198_c1_seq5	1936.42	1.39752	0.275181	5.07854	3.80343e-07	9.60533e-06
comp2254567_c0_seq2	77.4204	2.23196	0.439563	5.07767	3.82084e-07	9.64251e-06
comp2266609_c1_seq11	396.679	1.75544	0.345783	5.07671	3.84023e-07	9.68458e-06
comp2263631_c0_seq4	27.2232	-2.87643	0.567217	-5.07112	3.95483e-07	9.96655e-06
comp2254294_c0_seq1	198.69	-2.21842	0.437639	-5.06907	3.9976e-07	1.00673e-05
comp2278502_c0_seq2	687.448	1.39866	0.275931	5.06887	4.00193e-07	1.0071e-05
comp2206764_c0_seq1	470.177	-2.9511	0.582594	-5.06544	4.07451e-07	1.02465e-05
comp2263028_c0_seq4	1126.15	-1.86847	0.368989	-5.06376	4.11058e-07	1.03299e-05
comp1193891_c0_seq1	430.917	-2.24678	0.443719	-5.06351	4.11611e-07	1.03366e-05
comp2271362_c1_seq1	298.157	-0.995902	0.196688	-5.06335	4.11949e-07	1.03378e-05
comp2274259_c0_seq1	1042.29	0.981799	0.193913	5.06308	4.12536e-07	1.03452e-05
comp2265991_c0_seq1	496.802	-2.23839	0.442156	-5.06245	4.13896e-07	1.03721e-05
comp2248879_c0_seq1	182.081	2.58812	0.511261	5.06223	4.14373e-07	1.03767e-05
comp2232510_c0_seq1	486.627	-1.94559	0.384432	-5.06094	4.17193e-07	1.044e-05
comp2245003_c0_seq1	1204.89	-2.11327	0.417747	-5.05874	4.22029e-07	1.05537e-05
comp1194082_c0_seq1	394.219	1.55274	0.306949	5.05861	4.22333e-07	1.05539e-05
comp2260580_c0_seq2	752.291	-1.36066	0.269146	-5.05545	4.29369e-07	1.07222e-05
comp2254354_c0_seq1	55.4286	2.2081	0.437159	5.05102	4.39458e-07	1.09665e-05
comp2241437_c0_seq1	124.794	2.44899	0.484882	5.05069	4.40213e-07	1.09777e-05
comp2224691_c0_seq1	8.92956	-3.06706	0.607676	-5.0472	4.48328e-07	1.11722e-05
comp2233700_c0_seq1	90.1252	2.14818	0.425701	5.04622	4.50639e-07	1.1222e-05
comp2257477_c0_seq1	118.47	1.32457	0.262548	5.04506	4.53378e-07	1.12823e-05
comp2258725_c0_seq1	490.199	-1.75195	0.347298	-5.0445	4.54713e-07	1.13077e-05
comp2254541_c0_seq1	75.1323	-1.75019	0.347024	-5.04342	4.57292e-07	1.13639e-05
comp2143340_c0_seq1	712.444	1.78137	0.353381	5.04092	4.63287e-07	1.15049e-05
comp2260195_c0_seq3	9.24029	-2.93571	0.582596	-5.03901	4.67939e-07	1.16124e-05
comp2266922_c0_seq3	44.5114	2.31814	0.460084	5.03851	4.69165e-07	1.16347e-05
comp2140493_c0_seq1	181.615	2.80382	0.556786	5.03571	4.76073e-07	1.17978e-05
comp2277231_c0_seq2	77.7291	-1.92677	0.38276	-5.03389	4.8063e-07	1.18995e-05
comp2279404_c0_seq1	47.6238	2.80044	0.556327	5.0338	4.80843e-07	1.18995e-05
comp2264334_c0_seq1	542.843	-2.43084	0.483007	-5.03271	4.83591e-07	1.1957e-05
comp2277105_c0_seq7	656.733	-1.88252	0.374065	-5.03262	4.83833e-07	1.1957e-05
comp2273840_c1_seq5	452.24	-1.17199	0.232995	-5.03011	4.90188e-07	1.21056e-05
comp2199471_c0_seq1	174.828	1.32663	0.263813	5.02867	4.93906e-07	1.2189e-05
comp2275667_c0_seq1	1923.28	-1.37288	0.273165	-5.02581	5.01299e-07	1.2363e-05
gnl|Pdu_trscr_assembly_1|11031	515.374	1.60565	0.319667	5.02289	5.08993e-07	1.25441e-05
comp2231993_c0_seq1	34.2622	2.61283	0.520233	5.02241	5.10262e-07	1.25667e-05
comp2260797_c0_seq1	4995.01	-1.16509	0.232021	-5.02147	5.12768e-07	1.26197e-05
gnl|Pdu_trscr_assembly_1|19606	115.785	2.10941	0.420268	5.01919	5.18887e-07	1.27615e-05
comp2272998_c0_seq1	337.943	-1.20836	0.240773	-5.01868	5.20267e-07	1.27866e-05
comp1194397_c0_seq1	313.102	-1.23121	0.245354	-5.01811	5.21831e-07	1.28074e-05
comp2253766_c0_seq10	200.488	-2.21429	0.441249	-5.01823	5.21508e-07	1.28074e-05
comp2279383_c0_seq1	379.331	-1.94249	0.387162	-5.01726	5.24137e-07	1.28552e-05
comp2276086_c0_seq5	257.067	-2.38596	0.47577	-5.01493	5.3052e-07	1.30028e-05
comp2276531_c0_seq9	550.772	-1.46707	0.292552	-5.01473	5.31092e-07	1.30079e-05
comp2263390_c0_seq2	2543.58	-1.4966	0.298509	-5.01357	5.34297e-07	1.30739e-05
comp2265006_c0_seq2	596.637	-1.29413	0.258129	-5.01349	5.34518e-07	1.30739e-05
comp2252019_c0_seq1	153.229	1.83887	0.366925	5.01157	5.39875e-07	1.31959e-05
comp2248335_c1_seq1	31.8207	-2.00875	0.400899	-5.01061	5.42571e-07	1.32527e-05
comp2265404_c0_seq3	250.571	-2.4793	0.495077	-5.00791	5.50249e-07	1.34311e-05
comp2246244_c0_seq1	332.364	-2.96377	0.591881	-5.00737	5.5179e-07	1.34595e-05
comp2275557_c0_seq2	85.1679	-2.70331	0.540022	-5.00592	5.55973e-07	1.35523e-05
comp2271189_c0_seq4	97.5788	-2.11798	0.423174	-5.00498	5.58691e-07	1.36093e-05
comp2262778_c0_seq2	1496.75	-3.02416	0.60434	-5.00407	5.61311e-07	1.36638e-05
comp2273464_c0_seq3	728.967	-1.6488	0.329577	-5.00278	5.65083e-07	1.37462e-05
comp2270855_c0_seq7	84.3571	-1.91321	0.382571	-5.00094	5.70518e-07	1.38666e-05
comp2275847_c0_seq1	9740.08	-1.34279	0.268513	-5.00084	5.70805e-07	1.38666e-05
comp2262206_c0_seq1	3040.31	2.12859	0.425677	5.00049	5.71855e-07	1.38826e-05
comp2273570_c0_seq3	279.146	1.14397	0.228806	4.99975	5.7404e-07	1.39262e-05
comp2266388_c0_seq2	669.936	1.0216	0.204368	4.99885	5.76738e-07	1.39822e-05
comp2248034_c0_seq1	57.6183	2.39686	0.479541	4.99825	5.78532e-07	1.40162e-05
comp2264156_c0_seq1	463.126	1.34012	0.268171	4.99728	5.81448e-07	1.40773e-05
comp2266644_c0_seq1	177.983	1.45064	0.2903	4.99703	5.82197e-07	1.40859e-05
comp2260094_c0_seq3	6549.35	-1.49945	0.300193	-4.99494	5.88529e-07	1.42242e-05
comp2278144_c0_seq4	1145.05	1.52264	0.304841	4.99488	5.88709e-07	1.42242e-05
comp2278376_c0_seq1	3777.61	1.92824	0.386095	4.99421	5.90766e-07	1.42642e-05
comp2215664_c0_seq1	125.68	-1.56958	0.314294	-4.99397	5.91511e-07	1.42725e-05
comp2262877_c0_seq1	699.485	2.12131	0.424879	4.99273	5.9532e-07	1.43548e-05
comp2244049_c0_seq3	22.6219	-3.10316	0.621641	-4.99188	5.97945e-07	1.44083e-05
comp2264254_c0_seq2	63.3013	2.46395	0.493685	4.99092	6.00914e-07	1.44701e-05
comp2267934_c0_seq1	3011.35	-1.62247	0.325119	-4.99038	6.02591e-07	1.45007e-05
comp2273470_c1_seq2	392.647	-2.00268	0.401445	-4.98869	6.07911e-07	1.46189e-05
comp2256678_c0_seq1	436.527	-2.79605	0.560592	-4.98767	6.11109e-07	1.46859e-05
comp2267647_c0_seq1	254.783	1.71758	0.344416	4.98693	6.13452e-07	1.47224e-05
comp2269818_c0_seq2	286.99	1.59111	0.319055	4.98694	6.13421e-07	1.47224e-05
comp2277638_c0_seq1	1040.58	1.74263	0.34947	4.9865	6.14842e-07	1.47459e-05
comp2254316_c0_seq1	123.576	3.09865	0.621462	4.98606	6.16217e-07	1.4769e-05
comp2273563_c0_seq1	177.743	-1.60227	0.321365	-4.98581	6.17016e-07	1.47782e-05
gnl|Pdu_trscr_assembly_1|14023	644.157	-1.83427	0.367962	-4.98494	6.19804e-07	1.4835e-05
comp2251380_c0_seq1	524.731	2.16791	0.434972	4.98403	6.22747e-07	1.48874e-05
comp2278432_c0_seq4	1123.02	-1.71529	0.344159	-4.984	6.22825e-07	1.48874e-05
comp2241308_c0_seq1	154.998	1.6598	0.333168	4.98188	6.29709e-07	1.50419e-05
comp2274777_c0_seq1	1483.52	-0.993736	0.199553	-4.9798	6.36491e-07	1.51937e-05
comp2274386_c0_seq5	627.878	-2.20666	0.443209	-4.97883	6.39706e-07	1.52603e-05
comp2274076_c0_seq2	398.107	-1.67247	0.33596	-4.97817	6.41896e-07	1.53023e-05
comp2269277_c0_seq3	5336.37	2.05139	0.412121	4.97763	6.43687e-07	1.53348e-05
comp2274177_c0_seq1	2113.74	2.18234	0.438468	4.9772	6.45112e-07	1.53585e-05
comp2246670_c0_seq1	1956.35	-2.01713	0.405286	-4.97705	6.45608e-07	1.53601e-05
comp2266789_c0_seq1	808.496	-1.11668	0.224409	-4.97608	6.48861e-07	1.54272e-05
comp2200738_c0_seq1	123.661	-1.33556	0.268431	-4.97542	6.51058e-07	1.54504e-05
comp2271960_c0_seq6	251.583	2.42213	0.4868	4.97562	6.50403e-07	1.54504e-05
comp2276088_c1_seq1	80.8079	-2.10694	0.423472	-4.9754	6.51135e-07	1.54504e-05
comp2046374_c0_seq1	49.1993	-1.91353	0.384745	-4.97351	6.57521e-07	1.55916e-05
comp2270994_c0_seq16	2393.27	-1.61288	0.324313	-4.97324	6.5844e-07	1.5603e-05
comp2253748_c0_seq2	129.984	-1.7831	0.358661	-4.97156	6.64159e-07	1.57177e-05
comp2255222_c0_seq1	32.35	-1.82508	0.367099	-4.97161	6.63982e-07	1.57177e-05
comp2273096_c0_seq1	475.988	-1.46485	0.294662	-4.97128	6.65115e-07	1.57299e-05
comp2266591_c0_seq2	48.653	2.30365	0.463462	4.97052	6.67732e-07	1.57813e-05
comp2265639_c0_seq3	58.1247	2.0636	0.415413	4.96758	6.77926e-07	1.60117e-05
comp2262372_c0_seq1	117.674	1.61515	0.325283	4.96538	6.85666e-07	1.61838e-05
comp2275229_c0_seq16	1091.05	2.14352	0.431773	4.96445	6.88948e-07	1.62505e-05
comp2263059_c0_seq2	36.9484	-2.18029	0.439206	-4.96415	6.90028e-07	1.62653e-05
comp2268667_c0_seq1	190.453	-1.33238	0.268418	-4.96382	6.9121e-07	1.62824e-05
comp2272627_c0_seq1	260.192	1.2879	0.259525	4.96254	6.95763e-07	1.63788e-05
comp2274386_c1_seq3	410.778	-1.42382	0.286952	-4.96186	6.98197e-07	1.64253e-05
comp2276966_c0_seq13	3608.71	1.5593	0.314271	4.96163	6.99053e-07	1.64346e-05
comp2271348_c0_seq1	3052.19	1.07067	0.215876	4.95964	7.06246e-07	1.65928e-05
comp2278052_c1_seq2	3588.83	1.29669	0.261471	4.95922	7.07772e-07	1.66178e-05
comp2266584_c1_seq1	67.857	-2.11207	0.426047	-4.95736	7.14585e-07	1.67667e-05
gnl|Pdu_trscr_assembly_1|16516	202.869	1.50202	0.303078	4.95588	7.2005e-07	1.68839e-05
comp2263235_c1_seq1	42.8334	2.56567	0.51773	4.95562	7.20993e-07	1.68949e-05
gnl|Pdu_trscr_assembly_1|18248	163.143	-1.41353	0.285341	-4.95382	7.27687e-07	1.70294e-05
comp2274903_c0_seq2	118.787	2.27038	0.458303	4.95389	7.27431e-07	1.70294e-05
comp2261333_c0_seq2	78.2394	1.63034	0.329336	4.95039	7.40665e-07	1.73218e-05
comp2261145_c0_seq7	88.3799	1.32689	0.268166	4.94801	7.49768e-07	1.75232e-05
comp2232290_c0_seq2	13258	1.76653	0.35715	4.9462	7.56769e-07	1.76753e-05
comp2254796_c0_seq2	38.821	-2.47656	0.50098	-4.94344	7.67571e-07	1.79041e-05
comp2264679_c1_seq10	714.68	1.56812	0.317204	4.94356	7.67077e-07	1.79041e-05
comp2255715_c0_seq2	71.9325	-2.48557	0.502928	-4.94219	7.72481e-07	1.80069e-05
comp2265830_c0_seq1	231.597	-1.16483	0.235728	-4.94143	7.75532e-07	1.80663e-05
comp2269694_c0_seq2	384.684	1.19603	0.242061	4.94101	7.77191e-07	1.80931e-05
comp2277629_c0_seq2	442.576	-1.65516	0.335015	-4.94055	7.79008e-07	1.81236e-05
comp2042029_c0_seq1	1209.06	-2.02007	0.409038	-4.93859	7.86899e-07	1.82834e-05
comp2267061_c1_seq8	1204.58	-2.38954	0.483848	-4.93861	7.86819e-07	1.82834e-05
comp2268078_c0_seq2	989.004	1.20445	0.243898	4.93834	7.87897e-07	1.82947e-05
comp2262570_c0_seq3	511.256	-1.10163	0.223093	-4.93799	7.89328e-07	1.8316e-05
comp2266746_c0_seq5	80.8181	-1.62864	0.329828	-4.93785	7.89884e-07	1.8317e-05
comp2255764_c0_seq3	102.096	2.72507	0.551889	4.93771	7.90468e-07	1.83187e-05
comp2272614_c0_seq2	1066.35	2.30834	0.467685	4.93567	7.98752e-07	1.84986e-05
comp2269462_c0_seq3	1492.93	-1.28199	0.259826	-4.93403	8.0549e-07	1.86426e-05
comp2270718_c0_seq1	43.6083	-2.47836	0.502317	-4.93387	8.06172e-07	1.86426e-05
comp2275530_c0_seq7	1182.52	-2.31833	0.469889	-4.93378	8.06532e-07	1.86426e-05
comp2224545_c0_seq1	22.7249	-2.71406	0.550129	-4.93349	8.07728e-07	1.86581e-05
comp2240222_c0_seq1	32.0055	-3.24213	0.657341	-4.93219	8.13142e-07	1.87711e-05
comp2262404_c0_seq1	68.562	1.77817	0.360625	4.9308	8.18918e-07	1.88922e-05
comp2271503_c0_seq1	301.676	-1.4499	0.294155	-4.92905	8.26304e-07	1.90503e-05
comp2272742_c0_seq4	808.166	2.2095	0.448316	4.92845	8.28829e-07	1.90962e-05
comp2240463_c0_seq1	32.0078	-1.9584	0.397785	-4.92326	8.51131e-07	1.95974e-05
comp2240407_c0_seq1	1699.45	1.94578	0.395486	4.91999	8.65489e-07	1.99152e-05
comp2272661_c0_seq1	74.1808	1.46256	0.29731	4.91929	8.68584e-07	1.99735e-05
comp2264945_c0_seq1	61.6775	1.61554	0.328457	4.91856	8.7183e-07	2.00353e-05
comp2273438_c0_seq5	1128.22	-1.77104	0.360129	-4.9178	8.75225e-07	2.01004e-05
comp2261998_c0_seq2	382.871	2.15692	0.438693	4.91669	8.80209e-07	2.01974e-05
comp2269476_c0_seq1	829.1	-2.3267	0.473232	-4.9166	8.8058e-07	2.01974e-05
comp2266217_c0_seq8	819.288	-2.61929	0.53299	-4.91433	8.90871e-07	2.04203e-05
comp2279658_c0_seq1	124.93	1.70616	0.34731	4.91252	8.99152e-07	2.05969e-05
comp2143410_c0_seq1	160.746	-2.08313	0.424111	-4.91176	9.02624e-07	2.06632e-05
comp2268453_c0_seq1	1002.33	-1.78962	0.36452	-4.90954	9.12903e-07	2.08718e-05
comp2273537_c0_seq3	193.441	1.5682	0.319414	4.90961	9.12572e-07	2.08718e-05
comp2276210_c0_seq2	2582.87	-1.21738	0.247985	-4.90906	9.15141e-07	2.09096e-05
comp2277878_c2_seq6	462.676	1.1675	0.237833	4.9089	9.15888e-07	2.09133e-05
comp2273815_c0_seq4	62.2176	1.9782	0.403106	4.90739	9.22969e-07	2.10615e-05
comp2276182_c0_seq1	777.181	1.18949	0.242457	4.90597	9.29653e-07	2.12005e-05
comp2264779_c0_seq1	770.401	-1.4999	0.305771	-4.90529	9.3289e-07	2.12607e-05
comp2277206_c0_seq1	2914.65	2.12002	0.432212	4.90505	9.3403e-07	2.12731e-05
comp2276723_c0_seq4	1717.72	-1.58274	0.322725	-4.90428	9.37696e-07	2.1343e-05
comp2275927_c0_seq2	121.92	-1.67539	0.341663	-4.90365	9.40743e-07	2.13988e-05
comp2261597_c0_seq13	251.886	-1.62225	0.330855	-4.90319	9.4292e-07	2.1421e-05
comp2269534_c0_seq3	132.754	-1.68466	0.343575	-4.90331	9.42354e-07	2.1421e-05
comp2267821_c0_seq1	259.576	1.84728	0.376848	4.90194	9.48948e-07	2.15443e-05
comp2273755_c0_seq2	370.845	-2.24083	0.457316	-4.89996	9.58554e-07	2.17374e-05
comp2276597_c0_seq2	1496.82	-1.31479	0.268328	-4.89994	9.58672e-07	2.17374e-05
comp2256252_c0_seq1	19741.4	1.22116	0.249284	4.89865	9.64956e-07	2.1866e-05
comp2269467_c0_seq4	1765.42	-1.55583	0.317646	-4.89799	9.68222e-07	2.19261e-05
comp2270545_c0_seq4	1103.86	-1.03428	0.211245	-4.89612	9.77482e-07	2.21218e-05
comp2257382_c0_seq3	22975.8	2.60955	0.533116	4.89491	9.83494e-07	2.22161e-05
comp2269260_c0_seq1	46.7886	-2.07018	0.422917	-4.89501	9.8299e-07	2.22161e-05
comp2273758_c1_seq1	587.315	-2.51515	0.51383	-4.89491	9.83512e-07	2.22161e-05
comp2278058_c0_seq17	1963.43	-1.64282	0.335687	-4.89391	9.88508e-07	2.23148e-05
comp2266524_c0_seq7	35.7726	-2.46601	0.503953	-4.89333	9.91448e-07	2.2367e-05
comp2146953_c0_seq1	14.7818	-2.58951	0.529229	-4.89299	9.93141e-07	2.23911e-05
comp2262629_c0_seq3	45.5152	-1.8714	0.382632	-4.89087	1.00393e-06	2.26202e-05
comp2278288_c0_seq4	260.167	-2.51219	0.513852	-4.88894	1.0138e-06	2.28281e-05
comp2273628_c0_seq6	1710.1	1.04311	0.213394	4.88818	1.01773e-06	2.29022e-05
comp2271223_c0_seq1	283.634	-1.50633	0.308196	-4.88756	1.02093e-06	2.29596e-05
comp2263803_c0_seq1	2307.41	2.43517	0.49827	4.88725	1.02253e-06	2.29813e-05
comp2270203_c0_seq2	1540.71	-1.2358	0.252995	-4.88468	1.03599e-06	2.32692e-05
comp2266806_c0_seq8	352.437	2.38553	0.488465	4.88373	1.04097e-06	2.33663e-05
comp2261300_c0_seq2	97.5807	1.98157	0.405818	4.88291	1.04532e-06	2.34492e-05
comp2267525_c0_seq1	78.7972	-2.28122	0.467223	-4.88251	1.04746e-06	2.34825e-05
comp2282832_c0_seq1	405.733	-3.43556	0.703665	-4.88238	1.04813e-06	2.34828e-05
comp2248802_c1_seq2	145.158	-1.56842	0.321268	-4.88199	1.05021e-06	2.35145e-05
comp2269225_c0_seq5	125.349	-1.71169	0.350623	-4.88185	1.05098e-06	2.3517e-05
comp2272160_c0_seq5	2365.42	-2.79443	0.572453	-4.88151	1.05277e-06	2.35277e-05
comp2274690_c0_seq14	511.225	1.48528	0.304267	4.88152	1.05273e-06	2.35277e-05
comp1893218_c0_seq2	316.587	-2.01039	0.411985	-4.87976	1.06212e-06	2.37219e-05
comp2276626_c0_seq1	389.212	-1.82217	0.373489	-4.87878	1.06744e-06	2.38257e-05
comp2262582_c0_seq1	243.15	-1.79782	0.36872	-4.87585	1.0834e-06	2.41668e-05
comp2266058_c0_seq1	848.484	-1.49714	0.307147	-4.87435	1.09169e-06	2.43367e-05
comp2232461_c0_seq1	12584.8	-1.95748	0.401685	-4.87316	1.09828e-06	2.44683e-05
comp2273515_c0_seq1	129	1.5544	0.319229	4.86925	1.12022e-06	2.49414e-05
comp2272123_c0_seq4	146.521	1.8649	0.383025	4.86888	1.12232e-06	2.49726e-05
comp2274598_c0_seq1	95.1626	1.56193	0.320908	4.86721	1.13187e-06	2.51694e-05
comp2270674_c0_seq3	105.193	1.70607	0.350547	4.86688	1.13375e-06	2.51956e-05
comp2276314_c0_seq1	1860.29	-1.0439	0.214589	-4.86465	1.1466e-06	2.54653e-05
comp2267716_c0_seq2	1003.76	-2.27561	0.467935	-4.8631	1.15563e-06	2.565e-05
comp1194411_c0_seq1	276.835	2.09572	0.431055	4.86184	1.163e-06	2.57655e-05
comp2140636_c0_seq1	273.733	1.218	0.250516	4.86195	1.16233e-06	2.57655e-05
comp2258775_c0_seq1	37.4835	-2.29367	0.471756	-4.86197	1.16223e-06	2.57655e-05
comp2261136_c0_seq5	16.6552	2.96172	0.609272	4.86107	1.16752e-06	2.58496e-05
comp2262051_c0_seq1	109.662	2.45885	0.505842	4.8609	1.16852e-06	2.58557e-05
comp2276621_c1_seq7	77.2848	-2.33024	0.479619	-4.85853	1.18258e-06	2.61506e-05
gnl|Pdu_trscr_assembly_1|20826	114.998	1.95835	0.403167	4.85741	1.18931e-06	2.62831e-05
comp2269535_c0_seq6	326.596	-1.73818	0.357881	-4.85686	1.19262e-06	2.63401e-05
comp2275263_c0_seq3	159.326	-2.04822	0.421781	-4.85611	1.19713e-06	2.64139e-05
comp2277538_c0_seq1	65.0784	1.91645	0.394651	4.85606	1.19744e-06	2.64139e-05
comp2133746_c1_seq1	15.001	-2.86152	0.589434	-4.85468	1.2058e-06	2.65819e-05
comp2274095_c1_seq13	650.73	2.29297	0.472405	4.85381	1.21109e-06	2.66821e-05
comp2255514_c0_seq3	43.7467	-2.43914	0.50278	-4.85131	1.22648e-06	2.70045e-05
comp2200976_c0_seq2	14.3993	-2.55129	0.525926	-4.85104	1.22818e-06	2.70252e-05
comp2238128_c0_seq1	58.5302	-2.9513	0.608442	-4.85059	1.23095e-06	2.70695e-05
comp2260674_c0_seq3	42.664	-2.37895	0.490643	-4.84863	1.24315e-06	2.73143e-05
comp2275982_c0_seq18	359.959	1.70533	0.351719	4.84856	1.24361e-06	2.73143e-05
comp2271836_c0_seq2	1117.75	-1.48102	0.305653	-4.84541	1.26348e-06	2.77337e-05
comp2220020_c1_seq1	1429.63	-1.25181	0.25839	-4.84465	1.26833e-06	2.7823e-05
comp2269238_c0_seq1	398.504	-1.45084	0.299511	-4.84402	1.2724e-06	2.78953e-05
comp2258106_c0_seq2	195.925	1.71022	0.353088	4.84361	1.27504e-06	2.7936e-05
comp2266824_c1_seq3	47.9673	-1.37626	0.284183	-4.84286	1.27982e-06	2.80052e-05
comp2274043_c0_seq7	1516.26	2.18334	0.450848	4.84275	1.28055e-06	2.80052e-05
comp2277122_c0_seq2	1746.04	-1.07625	0.222228	-4.84298	1.27905e-06	2.80052e-05
comp2233685_c0_seq1	787.83	-1.8113	0.374127	-4.8414	1.2893e-06	2.81793e-05
comp2273190_c0_seq1	434.473	1.36629	0.28225	4.84071	1.29377e-06	2.82597e-05
comp2248645_c0_seq3	294.221	-1.18139	0.244078	-4.84021	1.29699e-06	2.82968e-05
comp2277440_c0_seq1	451.091	1.5475	0.319717	4.84021	1.29705e-06	2.82968e-05
comp2274476_c0_seq5	153.559	2.0212	0.418013	4.83525	1.32978e-06	2.8993e-05
comp2252950_c0_seq1	308.758	1.24238	0.256979	4.83455	1.33447e-06	2.90775e-05
comp2240678_c0_seq1	19.3746	-3.01507	0.623988	-4.83194	1.3521e-06	2.94437e-05
gnl|Pdu_trscr_assembly_1|264234	15.8934	-2.45407	0.508315	-4.82786	1.38008e-06	3.00349e-05
comp2273174_c0_seq4	28.9435	2.82497	0.585223	4.82717	1.38485e-06	3.01019e-05
comp2277424_c0_seq5	282.375	2.44516	0.50653	4.82728	1.3841e-06	3.01019e-05
comp2261201_c0_seq1	277.26	1.32248	0.274146	4.824	1.40705e-06	3.0566e-05
comp2268983_c0_seq1	559.308	-1.206	0.250105	-4.82199	1.42131e-06	3.0857e-05
comp2207922_c0_seq1	34.1385	-2.21207	0.459079	-4.8185	1.44643e-06	3.13339e-05
comp2245323_c1_seq1	231.158	-2.0599	0.427524	-4.81821	1.44854e-06	3.13339e-05
comp2259397_c0_seq12	23.8119	-2.20038	0.456663	-4.81839	1.44719e-06	3.13339e-05
comp2267410_c0_seq2	44.7586	2.29809	0.476931	4.81849	1.44649e-06	3.13339e-05
comp2268417_c0_seq2	3103.18	2.23661	0.464192	4.81827	1.44806e-06	3.13339e-05
comp2273899_c0_seq2	239.305	1.62408	0.33706	4.81838	1.44729e-06	3.13339e-05
comp2247091_c1_seq1	182.983	2.86069	0.593784	4.81772	1.45205e-06	3.13907e-05
comp2259156_c0_seq2	8.78119	-3.31201	0.687481	-4.8176	1.45299e-06	3.13921e-05
comp2247380_c0_seq1	102.747	-2.50212	0.519559	-4.81585	1.46576e-06	3.16376e-05
comp2257746_c0_seq2	275.896	2.11354	0.438877	4.8158	1.46612e-06	3.16376e-05
comp2254196_c0_seq1	48.3781	-1.67178	0.347352	-4.81292	1.4874e-06	3.20773e-05
comp2268797_c0_seq2	87.4813	2.59669	0.539678	4.81155	1.49765e-06	3.22789e-05
comp2266619_c0_seq2	52.5173	-2.24578	0.466805	-4.81097	1.50198e-06	3.23529e-05
comp2251425_c0_seq3	87.7295	-1.63841	0.340602	-4.81035	1.5067e-06	3.24153e-05
comp2271734_c0_seq2	85.3416	-2.49915	0.519525	-4.81045	1.50593e-06	3.24153e-05
comp2257439_c0_seq1	65.6043	1.99017	0.413751	4.81006	1.50886e-06	3.24423e-05
comp2270471_c0_seq1	2569.76	-1.45157	0.301877	-4.80848	1.5208e-06	3.26794e-05
comp2275601_c0_seq1	853.226	1.41337	0.29395	4.80819	1.52305e-06	3.2708e-05
gnl|Pdu_trscr_assembly_1|10817	260.536	-1.66598	0.346576	-4.80698	1.53225e-06	3.28662e-05
comp2276908_c0_seq5	3055.82	-1.48192	0.308279	-4.80707	1.53161e-06	3.28662e-05
comp2272909_c0_seq4	78.7131	2.49667	0.519456	4.80632	1.53731e-06	3.29548e-05
comp2277563_c0_seq3	1041.57	0.862867	0.179568	4.80523	1.54571e-06	3.31152e-05
comp2265351_c0_seq1	302.515	-1.76838	0.36805	-4.80474	1.54955e-06	3.31776e-05
comp2274767_c0_seq2	233.587	1.16671	0.242839	4.80444	1.55187e-06	3.32073e-05
comp2232024_c0_seq1	331.727	-2.25511	0.469415	-4.80407	1.55469e-06	3.32477e-05
comp2206043_c0_seq1	14.7486	2.98282	0.621044	4.80292	1.5637e-06	3.34203e-05
comp2267686_c0_seq1	265.042	-1.81879	0.378782	-4.80169	1.57331e-06	3.36057e-05
comp2248645_c1_seq1	365.853	-1.22297	0.254813	-4.79947	1.59086e-06	3.394e-05
comp2265328_c0_seq2	42.4444	2.61856	0.54558	4.79959	1.58993e-06	3.394e-05
comp2239524_c0_seq2	31.4351	-2.1826	0.454829	-4.79873	1.59675e-06	3.40453e-05
comp2260463_c0_seq3	86.0083	2.22813	0.464361	4.79827	1.60038e-06	3.4082e-05
comp2278151_c1_seq3	149.611	-1.62211	0.338059	-4.7983	1.60014e-06	3.4082e-05
comp2239573_c0_seq1	69.4952	-2.4196	0.504413	-4.79686	1.61175e-06	3.43037e-05
comp2265114_c0_seq44	1115.51	-1.39799	0.291446	-4.79672	1.61282e-06	3.4306e-05
comp2277489_c1_seq2	64.0978	-3.06578	0.639294	-4.79557	1.62212e-06	3.44833e-05
comp2274257_c2_seq1	291.779	1.71655	0.357965	4.7953	1.62436e-06	3.45103e-05
comp2273780_c0_seq7	677.292	-1.48956	0.310642	-4.79511	1.62584e-06	3.45213e-05
comp2277204_c0_seq2	1328.41	0.963411	0.200931	4.79473	1.62897e-06	3.45673e-05
comp2245811_c0_seq1	1752.51	1.60522	0.33483	4.79414	1.63376e-06	3.46483e-05
comp2200465_c0_seq2	618.068	-2.2314	0.465597	-4.79255	1.64678e-06	3.48694e-05
comp2264895_c0_seq2	106.435	-2.21354	0.461875	-4.79251	1.64711e-06	3.48694e-05
comp2272793_c0_seq1	797.615	-1.7214	0.359179	-4.7926	1.64637e-06	3.48694e-05
comp2271257_c1_seq1	2015.98	1.95339	0.407628	4.7921	1.65047e-06	3.49197e-05
comp2272169_c2_seq2	361.693	1.55067	0.32376	4.78956	1.67148e-06	3.53433e-05
comp2268336_c0_seq2	833.226	1.72479	0.360225	4.78809	1.68373e-06	3.55814e-05
comp2254385_c0_seq3	100.185	2.05474	0.429288	4.78639	1.6981e-06	3.58638e-05
comp2257550_c0_seq1	200.617	-1.80407	0.377068	-4.78448	1.71432e-06	3.61423e-05
comp2270488_c0_seq1	103.931	-1.17564	0.245718	-4.78451	1.71407e-06	3.61423e-05
comp2277716_c0_seq2	159.344	-1.71443	0.358315	-4.78469	1.71249e-06	3.61423e-05
comp2259320_c0_seq2	57.8139	2.10998	0.441219	4.78217	1.73414e-06	3.64964e-05
comp2260088_c1_seq2	89.0447	-2.25425	0.471399	-4.78205	1.7352e-06	3.64964e-05
comp2273215_c1_seq2	1147.59	1.82364	0.381333	4.78226	1.73332e-06	3.64964e-05
comp2275684_c1_seq2	504.121	1.53808	0.321636	4.78206	1.73504e-06	3.64964e-05
comp2275401_c0_seq3	962.351	-1.19137	0.249196	-4.78088	1.74533e-06	3.66879e-05
comp2269859_c0_seq1	791.607	-2.0937	0.437999	-4.78016	1.75153e-06	3.67965e-05
comp2277947_c0_seq1	1216.85	-1.60539	0.335863	-4.77989	1.75392e-06	3.68252e-05
comp2270756_c0_seq2	82.6267	-1.76877	0.370081	-4.77941	1.7581e-06	3.68912e-05
comp2277998_c0_seq6	235.251	-1.28258	0.268397	-4.77867	1.76458e-06	3.70055e-05
comp1194329_c0_seq1	1794.94	1.45296	0.304071	4.77837	1.76723e-06	3.70392e-05
comp2141429_c0_seq1	1281.12	-1.18264	0.247826	-4.77204	1.82372e-06	3.82008e-05
comp2278137_c0_seq1	354.352	-1.67891	0.351863	-4.7715	1.82863e-06	3.82812e-05
comp2262558_c0_seq2	126.444	-1.41153	0.295895	-4.77037	1.83886e-06	3.84623e-05
comp2264482_c0_seq2	30.9612	-2.5257	0.529463	-4.77031	1.83943e-06	3.84623e-05
comp2263378_c0_seq1	16.8092	-2.4027	0.50375	-4.76963	1.84568e-06	3.85703e-05
comp2273178_c0_seq1	248.177	1.60694	0.33694	4.76923	1.84932e-06	3.86238e-05
comp2264745_c0_seq4	185.174	-1.36531	0.286423	-4.76678	1.87191e-06	3.90729e-05
comp2265138_c2_seq2	91.2643	2.36487	0.496137	4.76658	1.87382e-06	3.90898e-05
comp2271808_c0_seq3	377.217	-2.15647	0.452477	-4.76593	1.87988e-06	3.91934e-05
comp2265586_c0_seq1	37.2756	-1.65958	0.348255	-4.76541	1.88467e-06	3.92704e-05
gnl|Pdu_trscr_assembly_1|2488	102.69	-1.60065	0.335915	-4.76503	1.88821e-06	3.93212e-05
comp2267707_c0_seq2	840.92	-2.09174	0.439578	-4.75851	1.95026e-06	4.05897e-05
comp2233646_c0_seq2	18.3561	-2.79035	0.586763	-4.75549	1.97962e-06	4.11768e-05
comp2269231_c0_seq2	3378.39	-1.304	0.274228	-4.75517	1.98277e-06	4.12184e-05
comp2241503_c0_seq1	11.2661	-2.52564	0.531218	-4.75443	1.99009e-06	4.13464e-05
comp2264219_c1_seq3	111.699	2.30318	0.484546	4.75328	2.00145e-06	4.15582e-05
gnl|Pdu_trscr_assembly_1|4310	920.343	2.15274	0.452912	4.7531	2.0032e-06	4.15704e-05
comp2248569_c0_seq1	145.239	-1.98432	0.417505	-4.75282	2.006e-06	4.16045e-05
comp2273735_c0_seq16	322.38	-1.64901	0.347037	-4.7517	2.01714e-06	4.18112e-05
comp2276938_c0_seq5	1340.17	-1.02882	0.216573	-4.75047	2.02947e-06	4.20423e-05
gnl|Pdu_trscr_assembly_1|8076	1183.38	0.663621	0.139701	4.7503	2.03114e-06	4.20526e-05
comp2251008_c0_seq2	14.5527	-3.05323	0.642918	-4.74902	2.04407e-06	4.2282e-05
comp2261576_c0_seq2	4074.25	-2.05543	0.432817	-4.74897	2.04459e-06	4.2282e-05
comp2269186_c0_seq3	595.968	1.03266	0.217483	4.74823	2.05204e-06	4.23381e-05
comp2271464_c0_seq3	359.06	-2.42135	0.509937	-4.74834	2.05095e-06	4.23381e-05
comp2273523_c0_seq3	1074.9	-2.14866	0.45249	-4.74852	2.04911e-06	4.23381e-05
comp2275714_c2_seq1	9241.14	-2.27829	0.479814	-4.74828	2.05157e-06	4.23381e-05
comp2256040_c0_seq3	4437.96	2.35437	0.495886	4.74781	2.05632e-06	4.24019e-05
comp2269321_c1_seq1	788.505	1.19377	0.251504	4.74655	2.06915e-06	4.26419e-05
comp2278511_c0_seq9	4151.58	-1.68859	0.355812	-4.74575	2.07738e-06	4.27869e-05
comp2256152_c0_seq2	34.71	2.00576	0.422772	4.74432	2.09206e-06	4.30645e-05
comp2271898_c0_seq1	543.917	1.37782	0.290424	4.74417	2.09363e-06	4.30719e-05
comp2274856_c0_seq3	47.0274	2.1661	0.456873	4.74115	2.12512e-06	4.36946e-05
comp2273124_c0_seq4	120.985	1.78487	0.376552	4.74003	2.13685e-06	4.39104e-05
comp2278199_c2_seq1	896.548	-1.57086	0.331558	-4.73781	2.16037e-06	4.43683e-05
comp2268195_c0_seq1	710.48	-1.1182	0.236032	-4.73752	2.16347e-06	4.44065e-05
comp2259529_c0_seq1	2072.67	1.80053	0.380107	4.73691	2.16998e-06	4.45144e-05
comp2252310_c0_seq2	43.6139	-2.31154	0.488063	-4.73615	2.17816e-06	4.4631e-05
comp2272458_c0_seq6	88.8895	2.6733	0.564437	4.73622	2.17742e-06	4.4631e-05
comp2243881_c0_seq1	100.454	1.62104	0.342415	4.73413	2.19992e-06	4.50305e-05
comp2264866_c0_seq1	291.984	-0.900902	0.1903	-4.73411	2.20017e-06	4.50305e-05
comp2273746_c0_seq1	80.5567	2.14486	0.453109	4.73364	2.20525e-06	4.51085e-05
comp2251922_c0_seq3	32.535	2.45622	0.518917	4.73335	2.20842e-06	4.51475e-05
comp2269273_c0_seq1	1374.92	-1.5312	0.324004	-4.72588	2.29116e-06	4.68122e-05
comp2270216_c2_seq1	122.029	-1.53794	0.325468	-4.72532	2.29751e-06	4.69151e-05
comp2267814_c0_seq7	532.252	-1.59948	0.33851	-4.72505	2.30059e-06	4.69512e-05
comp2254375_c0_seq1	41.9719	2.64133	0.559113	4.72415	2.31078e-06	4.71055e-05
comp2272098_c1_seq1	43.2394	2.64511	0.559911	4.72415	2.31079e-06	4.71055e-05
comp2265732_c0_seq4	476.26	-1.06391	0.225257	-4.7231	2.3228e-06	4.73234e-05
comp2274272_c0_seq1	242.839	-2.15233	0.455739	-4.72273	2.32705e-06	4.73829e-05
comp1953387_c0_seq1	381.444	0.933942	0.197785	4.722	2.33533e-06	4.75141e-05
comp2259500_c0_seq1	509.716	-1.33568	0.282867	-4.72193	2.33615e-06	4.75141e-05
comp2259125_c0_seq2	27.6601	-1.8395	0.389677	-4.72058	2.35171e-06	4.78034e-05
comp2263235_c0_seq3	19.2437	2.35512	0.498936	4.72029	2.35512e-06	4.78182e-05
comp2272453_c0_seq4	178.903	-1.62838	0.34497	-4.72034	2.35449e-06	4.78182e-05
comp2276865_c0_seq4	365.675	-2.06621	0.437788	-4.71966	2.36243e-06	4.79394e-05
comp2255240_c0_seq1	102.498	-1.80608	0.382735	-4.71888	2.37146e-06	4.80954e-05
comp2262167_c0_seq1	157.54	2.84889	0.603757	4.7186	2.37472e-06	4.81343e-05
comp2274834_c1_seq1	25.8757	-2.20449	0.467336	-4.71715	2.3917e-06	4.84508e-05
comp2258628_c0_seq1	46.8748	-2.13995	0.453999	-4.71355	2.43443e-06	4.92886e-05
comp2264493_c0_seq2	401.233	1.55364	0.329681	4.71255	2.44642e-06	4.95032e-05
comp2272103_c1_seq2	653.444	1.92126	0.40772	4.71221	2.4504e-06	4.95557e-05
comp2273019_c0_seq5	813.41	-1.31335	0.278895	-4.70911	2.48795e-06	5.02868e-05
comp2265669_c0_seq1	38.2006	1.95331	0.414918	4.70771	2.50515e-06	5.06057e-05
comp2272636_c0_seq2	462.551	2.0869	0.443419	4.70637	2.52162e-06	5.09096e-05
comp2275684_c0_seq21	207.74	1.48546	0.315653	4.70601	2.52616e-06	5.09725e-05
comp2260564_c0_seq1	144.543	1.11481	0.236957	4.70468	2.5427e-06	5.12772e-05
comp2261673_c1_seq1	48.3112	2.31571	0.492321	4.70365	2.55548e-06	5.1506e-05
comp2270279_c0_seq7	3868.61	-1.5355	0.326473	-4.70329	2.56003e-06	5.15686e-05
comp2271696_c0_seq6	136.431	-1.69882	0.361212	-4.7031	2.56237e-06	5.15866e-05
gnl|Pdu_trscr_assembly_1|16667	1086.61	-1.36207	0.289673	-4.70207	2.57533e-06	5.18025e-05
comp2268349_c0_seq3	2447.28	-1.19063	0.253217	-4.70202	2.57599e-06	5.18025e-05
comp2276167_c0_seq2	113.318	-1.70373	0.362428	-4.70086	2.59063e-06	5.20676e-05
comp2234167_c0_seq3	681.854	-1.06907	0.227431	-4.70064	2.59351e-06	5.20961e-05
comp2271892_c0_seq3	539.975	-1.03291	0.219793	-4.69948	2.60829e-06	5.23636e-05
comp2259185_c0_seq1	25.4312	2.43536	0.518387	4.69795	2.62781e-06	5.27259e-05
comp2275898_c0_seq1	397.317	1.15381	0.245684	4.69632	2.64887e-06	5.31186e-05
comp2258025_c0_seq4	46.7071	2.05666	0.43802	4.69535	2.66147e-06	5.32856e-05
comp2266519_c0_seq6	169.146	-1.87678	0.399705	-4.69542	2.66058e-06	5.32856e-05
comp2270351_c0_seq10	526.722	-0.890288	0.189611	-4.69534	2.66167e-06	5.32856e-05
comp2248177_c1_seq1	47.4947	2.11732	0.451197	4.69267	2.69667e-06	5.39561e-05
comp2274822_c0_seq2	647.062	-2.62199	0.55917	-4.68907	2.74443e-06	5.4881e-05
gnl|Pdu_trscr_assembly_1|16325	492.405	-1.24277	0.265095	-4.68803	2.75853e-06	5.51321e-05
comp2278240_c0_seq4	312.322	1.81381	0.386921	4.68782	2.76136e-06	5.51577e-05
comp2224449_c0_seq1	61.494	-2.02946	0.433022	-4.68675	2.77584e-06	5.5416e-05
comp2273142_c1_seq1	498.884	1.49422	0.318922	4.68521	2.79667e-06	5.58007e-05
comp2256304_c0_seq1	63.8856	2.25195	0.480812	4.68365	2.81818e-06	5.61984e-05
comp2247536_c0_seq1	102.532	-1.87939	0.401342	-4.68275	2.83046e-06	5.63941e-05
comp2252609_c0_seq1	133.644	-2.11557	0.451796	-4.68259	2.83272e-06	5.63941e-05
comp2254001_c0_seq2	76.1987	1.81503	0.387608	4.68264	2.83198e-06	5.63941e-05
comp2259728_c0_seq2	46.5559	-1.69405	0.362039	-4.67921	2.87983e-06	5.73001e-05
comp2269583_c0_seq5	79.9392	-1.85748	0.397031	-4.67842	2.89087e-06	5.74876e-05
comp2260417_c1_seq1	12.6496	2.57545	0.550706	4.67662	2.91639e-06	5.79307e-05
comp2273350_c0_seq1	454.831	1.26908	0.271366	4.67663	2.91624e-06	5.79307e-05
comp2249595_c0_seq1	15.5819	-2.56631	0.548898	-4.67539	2.93393e-06	5.82466e-05
comp2142969_c0_seq1	84.31	-1.87481	0.401159	-4.67347	2.96156e-06	5.87626e-05
comp2220544_c0_seq1	53.369	-1.997	0.427323	-4.67328	2.96433e-06	5.8785e-05
comp2263225_c0_seq10	80.5631	-1.96944	0.421499	-4.67245	2.97625e-06	5.89885e-05
comp2270996_c0_seq5	1845.11	-1.75468	0.375855	-4.66851	3.03397e-06	6.00991e-05
comp2262352_c0_seq3	411.007	-1.51669	0.324992	-4.66685	3.05856e-06	6.05526e-05
comp2269964_c1_seq7	338.585	-1.24888	0.267645	-4.66618	3.06846e-06	6.07151e-05
comp1935283_c0_seq1	363.247	-0.968995	0.207714	-4.66503	3.08569e-06	6.10221e-05
comp2258878_c0_seq9	1903.35	-1.18454	0.253932	-4.66478	3.08945e-06	6.10627e-05
comp2276298_c0_seq2	245.425	1.27483	0.273408	4.66275	3.12008e-06	6.1634e-05
comp2262324_c0_seq2	393.915	-1.11983	0.240173	-4.66262	3.12211e-06	6.16402e-05
comp1991283_c0_seq1	146.691	1.62273	0.348172	4.66071	3.15123e-06	6.21807e-05
comp2245797_c0_seq4	43.6718	2.76366	0.593097	4.65971	3.16663e-06	6.24155e-05
comp2272976_c0_seq14	528.533	1.07691	0.231111	4.65973	3.1663e-06	6.24155e-05
comp2275149_c1_seq1	465.47	2.60261	0.558599	4.65918	3.17473e-06	6.25408e-05
comp2243318_c0_seq1	936.221	-1.81813	0.39035	-4.6577	3.19767e-06	6.2958e-05
comp2259658_c0_seq4	59.5705	1.93695	0.416007	4.65606	3.22315e-06	6.34248e-05
comp2235040_c0_seq1	178.595	-1.23922	0.266163	-4.65587	3.22616e-06	6.34491e-05
comp2256613_c0_seq1	1304.58	2.06397	0.443344	4.65546	3.23259e-06	6.35405e-05
gnl|Pdu_trscr_assembly_1|2466	966.365	-1.33805	0.287442	-4.65505	3.23904e-06	6.36324e-05
gnl|Pdu_trscr_assembly_1|95352	56.716	2.03218	0.436577	4.65481	3.2428e-06	6.36711e-05
comp2251286_c0_seq6	99.1411	-2.1607	0.46423	-4.65437	3.24969e-06	6.37714e-05
comp2265946_c0_seq2	125.785	-3.0939	0.664869	-4.65339	3.26517e-06	6.404e-05
comp2277195_c0_seq1	468.853	0.712209	0.15308	4.65252	3.27901e-06	6.42762e-05
comp2265088_c0_seq2	53.0372	2.24872	0.483356	4.6523	3.28259e-06	6.4311e-05
comp2270079_c1_seq2	1706.84	-1.12752	0.242368	-4.65211	3.28556e-06	6.4334e-05
comp2235332_c0_seq1	149.641	-1.98818	0.427451	-4.65124	3.29939e-06	6.45693e-05
comp2276746_c0_seq7	1645.65	1.27333	0.273877	4.64927	3.33112e-06	6.51547e-05
comp2222438_c0_seq1	23.0093	2.66251	0.572717	4.6489	3.33702e-06	6.52344e-05
comp2273048_c0_seq1	360.647	1.82069	0.391777	4.64727	3.36358e-06	6.57177e-05
comp2273966_c0_seq7	298.336	1.183	0.254607	4.64639	3.37801e-06	6.59275e-05
comp2277984_c0_seq7	796.19	-1.4538	0.312881	-4.64649	3.3763e-06	6.59275e-05
gnl|Pdu_trscr_assembly_1|9255	72.4626	2.06038	0.44347	4.64604	3.38371e-06	6.59955e-05
comp2273647_c0_seq2	1509.65	2.11794	0.455869	4.64595	3.38519e-06	6.59955e-05
comp2261773_c0_seq2	191.009	-1.44468	0.310966	-4.64579	3.38781e-06	6.60106e-05
comp2258703_c0_seq1	11.3407	-2.81348	0.605786	-4.64436	3.4114e-06	6.6434e-05
comp2271287_c1_seq1	75.9735	2.47213	0.532403	4.64335	3.42809e-06	6.67227e-05
comp2276487_c0_seq3	445.787	-1.39169	0.299737	-4.64302	3.43357e-06	6.6793e-05
comp2237339_c0_seq1	17.152	-2.18778	0.471343	-4.64159	3.45737e-06	6.72193e-05
comp2272937_c0_seq1	2033.71	1.09193	0.235354	4.63953	3.4921e-06	6.78576e-05
comp2268274_c0_seq2	516.989	-1.06071	0.22868	-4.63839	3.51128e-06	6.81932e-05
gnl|Pdu_trscr_assembly_1|19463	1188.8	-1.17266	0.252834	-4.63805	3.51704e-06	6.82681e-05
comp2258637_c0_seq3	51.9378	2.06375	0.445414	4.63334	3.59816e-06	6.97381e-05
comp2274436_c0_seq1	253.89	1.14927	0.248044	4.63331	3.59863e-06	6.97381e-05
comp2275983_c0_seq1	1805.46	-1.93114	0.41678	-4.63347	3.59582e-06	6.97381e-05
comp2272177_c0_seq2	1032.47	2.51307	0.542414	4.63313	3.6018e-06	6.97618e-05
comp2271029_c0_seq1	1135.74	1.55941	0.336602	4.63282	3.60726e-06	6.98003e-05
comp2273867_c1_seq6	181.317	1.55029	0.334634	4.63279	3.6077e-06	6.98003e-05
comp2265773_c0_seq2	203.365	-1.562	0.33721	-4.63211	3.61957e-06	6.99921e-05
comp2270078_c0_seq1	445.194	-0.952531	0.20567	-4.63136	3.63276e-06	7.02091e-05
comp2266223_c0_seq2	169.942	-1.5211	0.328482	-4.6307	3.64435e-06	7.0395e-05
comp2278458_c0_seq9	2977.76	-0.668769	0.144484	-4.62868	3.68012e-06	7.10476e-05
comp2277652_c0_seq4	3136.46	2.14594	0.463631	4.62855	3.68233e-06	7.10519e-05
comp2275371_c0_seq2	502.795	1.25826	0.272026	4.62551	3.73681e-06	7.20641e-05
comp2225089_c0_seq1	9.73973	-2.7975	0.604831	-4.62526	3.74123e-06	7.20716e-05
comp2275224_c0_seq3	662.295	1.93137	0.417562	4.62535	3.73964e-06	7.20716e-05
comp2266878_c0_seq1	68.2237	-2.08569	0.451022	-4.62435	3.75776e-06	7.23511e-05
comp2252893_c0_seq1	50.4029	-2.31597	0.501018	-4.62253	3.79081e-06	7.29088e-05
comp2272381_c0_seq3	59.0834	-1.94848	0.42151	-4.6226	3.78956e-06	7.29088e-05
comp2279852_c0_seq1	1845.33	-1.49992	0.324525	-4.6219	3.80248e-06	7.30939e-05
comp2277057_c2_seq1	297.342	-1.29616	0.280451	-4.62169	3.80628e-06	7.31276e-05
comp2277297_c0_seq3	203.477	-1.36284	0.295061	-4.61883	3.85918e-06	7.41041e-05
comp2267864_c0_seq3	36.0512	2.33039	0.504906	4.6155	3.92155e-06	7.52614e-05
comp2241024_c0_seq1	133.205	1.35371	0.293422	4.61353	3.95894e-06	7.59381e-05
comp2275528_c0_seq1	1199.37	1.33134	0.28862	4.61278	3.97317e-06	7.61293e-05
comp2278485_c0_seq1	4429.59	1.18225	0.256298	4.61279	3.97294e-06	7.61293e-05
comp2252230_c0_seq1	9.00071	-2.92668	0.634708	-4.61107	4.006e-06	7.66908e-05
comp2270956_c1_seq4	431.481	1.3155	0.285301	4.61092	4.00891e-06	7.66908e-05
comp2277309_c0_seq6	1214.75	-1.49615	0.324477	-4.61095	4.00829e-06	7.66908e-05
comp2268727_c0_seq1	564.168	-1.24515	0.270086	-4.61018	4.02322e-06	7.69234e-05
comp2268046_c1_seq1	2707.16	-1.08308	0.234953	-4.60977	4.03118e-06	7.70343e-05
comp2138805_c0_seq2	24.2265	2.13886	0.46407	4.60891	4.04784e-06	7.73114e-05
comp2252307_c0_seq1	275.838	-1.11693	0.242372	-4.60833	4.05924e-06	7.74877e-05
comp2276289_c0_seq1	3004.52	1.35715	0.294512	4.60811	4.06342e-06	7.75261e-05
comp2245391_c0_seq1	193.702	1.92321	0.417503	4.60646	4.09584e-06	7.81029e-05
comp2277698_c0_seq15	1950.37	-1.35423	0.294074	-4.60505	4.12361e-06	7.85905e-05
gnl|Pdu_trscr_assembly_1|1263	111.96	1.66496	0.36165	4.60378	4.14893e-06	7.90309e-05
comp2276103_c0_seq11	704.906	-1.08211	0.235065	-4.60342	4.15607e-06	7.91248e-05
comp2272395_c0_seq1	7004.43	-1.90554	0.414124	-4.60138	4.19711e-06	7.98635e-05
comp2265105_c0_seq1	216.812	-1.32286	0.287527	-4.60084	4.20801e-06	8.00282e-05
comp2240424_c0_seq2	36.0952	-1.92679	0.419006	-4.59847	4.25609e-06	8.08997e-05
comp2254390_c0_seq1	267.481	1.1212	0.243846	4.59798	4.26611e-06	8.10471e-05
comp2264165_c0_seq4	870.201	-1.65658	0.360391	-4.59662	4.29392e-06	8.1532e-05
comp2248271_c0_seq1	17.7157	2.73812	0.595695	4.59651	4.29635e-06	8.15349e-05
gnl|Pdu_trscr_assembly_1|201059	136.675	1.80173	0.392011	4.59612	4.30431e-06	8.16425e-05
comp2261841_c1_seq1	33.106	2.61952	0.569986	4.59576	4.31178e-06	8.17408e-05
comp2258222_c0_seq1	570.287	-1.52507	0.331881	-4.59522	4.32294e-06	8.19089e-05
comp2142074_c0_seq1	141.655	-1.00873	0.219601	-4.59347	4.35927e-06	8.25535e-05
comp2270781_c0_seq3	381.874	2.32846	0.507159	4.59119	4.40735e-06	8.34199e-05
comp2245798_c0_seq1	16.6765	-2.7013	0.588487	-4.59025	4.42711e-06	8.37495e-05
comp2268992_c0_seq1	361.57	-1.42232	0.309892	-4.58975	4.43777e-06	8.39068e-05
comp2263558_c3_seq9	1574.66	-1.80984	0.394559	-4.587	4.49655e-06	8.49731e-05
comp2264718_c0_seq1	551.907	-1.41777	0.309137	-4.58621	4.51367e-06	8.52516e-05
comp2264976_c0_seq1	32.1988	-2.00648	0.437576	-4.58544	4.53032e-06	8.55208e-05
comp2276661_c0_seq2	1331.53	1.82153	0.397376	4.5839	4.56389e-06	8.61091e-05
comp2281439_c0_seq1	728.515	-3.16792	0.691223	-4.58307	4.58206e-06	8.64064e-05
comp2238068_c1_seq2	33.4403	2.62431	0.572638	4.58284	4.58708e-06	8.64553e-05
comp2268817_c3_seq1	105.451	-1.62848	0.355355	-4.58268	4.59059e-06	8.64759e-05
comp2266906_c1_seq5	91.3386	-2.15882	0.471145	-4.58207	4.60396e-06	8.66821e-05
comp2263643_c0_seq1	18.5847	-2.29121	0.500125	-4.58127	4.6217e-06	8.69703e-05
comp2244586_c0_seq1	37.2499	-1.80167	0.39332	-4.58068	4.63465e-06	8.7168e-05
comp2257886_c1_seq1	21.4911	2.38905	0.52165	4.5798	4.65414e-06	8.74885e-05
comp2273323_c0_seq2	101.47	-2.2527	0.492106	-4.57768	4.70163e-06	8.83348e-05
comp2270480_c0_seq1	645.373	-1.14525	0.250266	-4.57614	4.73639e-06	8.89412e-05
comp2246786_c0_seq1	10.4854	-2.51233	0.549023	-4.576	4.73955e-06	8.89537e-05
comp2232067_c0_seq2	126.002	-2.24803	0.491291	-4.57575	4.74507e-06	8.90106e-05
gnl|Pdu_trscr_assembly_1|22197	258.966	1.35924	0.297068	4.57552	4.75034e-06	8.90626e-05
comp2257660_c0_seq2	103.515	2.30546	0.503981	4.5745	4.77363e-06	8.94523e-05
comp2277360_c0_seq2	858.983	1.11883	0.244611	4.57391	4.78717e-06	8.9659e-05
comp2265744_c0_seq2	357.116	-2.09649	0.458447	-4.57304	4.80699e-06	8.99832e-05
comp2267066_c1_seq2	183.03	-1.71783	0.375808	-4.57102	4.85348e-06	9.08058e-05
comp2237921_c0_seq1	29.8114	2.31318	0.506068	4.57089	4.85654e-06	9.08155e-05
gnl|Pdu_trscr_assembly_1|21544	55.5901	1.71551	0.375378	4.57008	4.87527e-06	9.1118e-05
comp2266189_c0_seq1	297.772	-1.2913	0.282587	-4.56958	4.88699e-06	9.12895e-05
comp2275976_c0_seq1	135.398	-1.50737	0.329905	-4.56909	4.89851e-06	9.14567e-05
comp2264329_c0_seq2	100.988	1.79248	0.392392	4.56809	4.92186e-06	9.18448e-05
comp2279748_c0_seq1	3676.35	-1.18175	0.258784	-4.56654	4.95841e-06	9.24784e-05
comp2253827_c0_seq3	17.566	-2.60613	0.570776	-4.56595	4.97248e-06	9.26441e-05
comp2276036_c0_seq4	146.622	-1.33362	0.29208	-4.56596	4.97206e-06	9.26441e-05
comp2276559_c0_seq10	1601.74	-1.25716	0.275389	-4.56505	4.99386e-06	9.29941e-05
comp2274101_c2_seq1	63.3603	-1.70884	0.374486	-4.56317	5.03867e-06	9.37796e-05
comp2264127_c0_seq1	324.568	2.08982	0.457988	4.56305	5.04165e-06	9.37863e-05
comp2241974_c0_seq1	146.442	2.4439	0.535665	4.56237	5.058e-06	9.40415e-05
comp2227318_c0_seq2	29.5398	-2.11206	0.46299	-4.56179	5.07206e-06	9.42537e-05
comp2267169_c0_seq1	31564.6	-1.40984	0.309076	-4.56148	5.07954e-06	9.43438e-05
comp2265766_c0_seq7	52.6133	2.27362	0.498586	4.56014	5.112e-06	9.48973e-05
comp2265100_c0_seq2	78.1442	2.21348	0.485462	4.55955	5.12641e-06	9.51154e-05
comp2142514_c0_seq2	83.2469	2.05958	0.451827	4.55834	5.15588e-06	9.56126e-05
comp2261633_c0_seq2	77.8545	-1.48336	0.325493	-4.55726	5.18249e-06	9.60561e-05
comp2271382_c0_seq3	60.4686	-2.54136	0.557719	-4.5567	5.19627e-06	9.62616e-05
comp2249336_c0_seq1	840.479	-1.92631	0.422769	-4.55642	5.20328e-06	9.63416e-05
comp2253327_c0_seq1	37.0105	-1.67055	0.366876	-4.55345	5.27737e-06	9.76628e-05
comp2274725_c0_seq3	778.327	-1.35267	0.297082	-4.55319	5.28385e-06	9.77321e-05
comp2275945_c0_seq4	1458.22	-1.69283	0.371865	-4.55227	5.30708e-06	9.8111e-05
comp2244978_c1_seq1	59.8776	1.67441	0.367855	4.55183	5.3181e-06	9.82638e-05
comp2272215_c1_seq3	379.048	-1.99686	0.438739	-4.55136	5.32992e-06	9.84313e-05
comp2267778_c0_seq5	26.5689	-2.46542	0.541898	-4.5496	5.37487e-06	9.92103e-05
comp2275275_c2_seq1	69.5162	1.70159	0.374079	4.54875	5.39659e-06	9.95596e-05
comp2265205_c2_seq7	81.5399	2.39791	0.527186	4.5485	5.40297e-06	9.96261e-05
comp2240824_c0_seq1	424.156	-1.15236	0.25336	-4.54832	5.40765e-06	9.96608e-05
comp2254062_c0_seq1	99.4459	-2.15183	0.473163	-4.54774	5.42242e-06	9.983e-05
comp2261088_c0_seq2	230.302	-1.52515	0.33536	-4.5478	5.421e-06	9.983e-05
comp2276380_c0_seq21	1760.81	-1.4466	0.318104	-4.54757	5.42695e-06	9.98621e-05
comp2272566_c1_seq3	715.63	1.20752	0.265596	4.54647	5.45543e-06	0.000100334
comp2262796_c0_seq1	269.32	1.00286	0.220601	4.54606	5.46595e-06	0.000100476
comp2266191_c3_seq1	89.6401	2.09881	0.46185	4.54435	5.51055e-06	0.000101244
comp2198403_c0_seq2	108.994	1.96267	0.431952	4.54372	5.52704e-06	0.000101495
comp2238786_c0_seq4	748.795	1.03029	0.226814	4.54247	5.5599e-06	0.000101993
comp2266341_c0_seq1	71.3133	-1.91455	0.42147	-4.54255	5.5578e-06	0.000101993
comp2277739_c0_seq12	2054.29	-2.15547	0.474598	-4.54167	5.58102e-06	0.000102328
comp2232050_c0_seq1	127.133	1.66878	0.367564	4.54011	5.62243e-06	0.000103035
comp2262403_c0_seq2	359.51	-1.21596	0.267858	-4.53957	5.63704e-06	0.000103249
comp2274498_c0_seq1	92.1486	1.57105	0.346164	4.53845	5.66684e-06	0.000103742
comp2271461_c2_seq1	180.981	1.06092	0.233839	4.53698	5.70649e-06	0.000104415
comp2270020_c0_seq1	1464.9	-1.1938	0.263152	-4.53655	5.71808e-06	0.000104573
comp2266296_c0_seq3	393.826	-1.73117	0.381667	-4.5358	5.73848e-06	0.000104892
comp2262891_c0_seq3	30.7923	2.33475	0.514752	4.53568	5.7418e-06	0.000104899
comp2265826_c0_seq2	1820.9	2.33158	0.514119	4.5351	5.75766e-06	0.000105135
comp2260492_c1_seq4	357.379	2.2651	0.499519	4.53456	5.77248e-06	0.000105352
comp2277524_c0_seq4	4817.38	-1.35524	0.298884	-4.53434	5.77845e-06	0.000105407
comp2257683_c0_seq2	70.2227	-2.08809	0.460538	-4.53403	5.78701e-06	0.00010551
comp2258535_c0_seq2	41.5286	-1.83833	0.40548	-4.53372	5.79534e-06	0.000105608
comp1194375_c0_seq1	134.908	1.42552	0.31444	4.5335	5.8013e-06	0.000105662
comp2268643_c0_seq1	57.4914	1.7938	0.395714	4.53306	5.81354e-06	0.000105831
comp2275628_c0_seq16	400.109	1.29793	0.286371	4.53234	5.83347e-06	0.00010614
comp2260181_c0_seq1	19.9322	2.40883	0.531648	4.53088	5.87394e-06	0.000106822
comp2225417_c0_seq1	524.419	-1.29269	0.285375	-4.52981	5.90356e-06	0.000107306
comp2266926_c0_seq2	2330.06	-1.23243	0.272105	-4.52924	5.91948e-06	0.000107541
comp2257450_c0_seq2	112.076	-1.42898	0.315519	-4.52899	5.9267e-06	0.000107617
comp2274902_c1_seq5	78.5604	1.60028	0.353357	4.52878	5.93249e-06	0.000107668
comp2272443_c0_seq5	41.8296	-2.5235	0.557394	-4.52732	5.9737e-06	0.00010836
comp2141370_c0_seq1	34.8472	2.3174	0.511968	4.52645	5.99832e-06	0.000108752
comp2204288_c0_seq1	43.8117	2.55163	0.563796	4.52581	6.01651e-06	0.000109026
comp2274637_c0_seq3	670.98	-1.72242	0.380643	-4.52503	6.03876e-06	0.000109374
comp2275642_c0_seq13	445.662	-1.42841	0.315818	-4.52289	6.10011e-06	0.000110429
comp2276312_c0_seq6	2200.99	-1.31966	0.291801	-4.52247	6.11217e-06	0.000110592
comp2265267_c1_seq1	23.8853	2.64935	0.585845	4.52227	6.11807e-06	0.000110642
comp2277543_c1_seq5	213.825	-1.12509	0.248807	-4.52194	6.12756e-06	0.000110758
comp2224883_c0_seq1	238.865	-2.00132	0.442679	-4.52094	6.15664e-06	0.000111227
comp2265988_c1_seq1	46.9263	2.45619	0.54335	4.52046	6.1705e-06	0.000111421
comp2276934_c0_seq1	380.349	1.25981	0.27874	4.51967	6.19359e-06	0.000111782
comp2192188_c0_seq2	1124.6	-0.876984	0.194084	-4.51859	6.22538e-06	0.000112299
comp2267858_c0_seq2	821.787	-1.97123	0.436436	-4.51665	6.2827e-06	0.000113276
comp2261355_c0_seq1	832.837	1.5733	0.348406	4.5157	6.31092e-06	0.00011367
comp2262804_c0_seq1	62.3256	-2.42959	0.538019	-4.5158	6.30789e-06	0.00011367
comp2250204_c0_seq1	31.2947	2.55434	0.565828	4.51434	6.35139e-06	0.000114341
comp2071630_c0_seq1	10.4329	-2.72957	0.604689	-4.51401	6.36129e-06	0.000114404
comp2272629_c0_seq1	1536.18	0.936999	0.207574	4.51404	6.36031e-06	0.000114404
comp1888429_c0_seq1	1634.25	-0.961016	0.212904	-4.51384	6.36653e-06	0.000114441
gnl|Pdu_trscr_assembly_1|151157	61.4435	-1.78493	0.395497	-4.51314	6.38756e-06	0.000114703
comp2269113_c0_seq1	93.7212	-1.64286	0.36401	-4.51322	6.38506e-06	0.000114703
comp2278032_c0_seq9	750.483	1.60857	0.35647	4.5125	6.40694e-06	0.000114993
comp2267891_c0_seq1	514.895	-1.70688	0.378461	-4.51007	6.48075e-06	0.00011626
comp2263163_c0_seq5	51.849	-1.97574	0.438194	-4.50882	6.51902e-06	0.000116888
comp2277414_c0_seq1	371.44	-1.45978	0.323832	-4.50784	6.54901e-06	0.000117367
comp2249971_c0_seq2	30.8777	-2.32036	0.514768	-4.50758	6.55698e-06	0.00011745
comp2257161_c0_seq1	559.148	2.26914	0.503451	4.50717	6.56985e-06	0.000117622
comp2277771_c0_seq4	898.835	1.11795	0.248217	4.50392	6.67117e-06	0.000119376
comp2261853_c0_seq1	277.766	-1.24734	0.277	-4.50303	6.69926e-06	0.000119819
comp2276437_c1_seq1	448.266	1.70671	0.37912	4.50178	6.73874e-06	0.000120465
[truncated: 7,222 more rows]

## Sheet: IM_NM vs M_NM_Male
	baseMean	log2FoldChange	lfcSE	stat	pvalue	padj
comp2269662_c0_seq8	18757.1	-9.64849	0.350096	-27.5596	3.39944e-167	1.28301e-162
comp2257567_c0_seq1	2601.19	-7.64147	0.340739	-22.4262	2.18559e-111	4.12443e-107
comp2251363_c0_seq1	222.629	-8.60552	0.429042	-20.0575	1.73524e-89	2.18304e-85
comp2265326_c0_seq3	5903.1	8.12943	0.440677	18.4476	5.45064e-76	5.14295e-72
comp2223254_c0_seq1	1776.33	-10.0732	0.549895	-18.3184	5.90412e-75	4.45666e-71
comp2254792_c1_seq4	10946.5	-10.0521	0.552586	-18.1909	6.09054e-74	3.83115e-70
comp2265751_c0_seq4	462.568	-7.83036	0.445455	-17.5784	3.60908e-69	1.94591e-65
comp2265263_c0_seq1	3439.88	-6.99027	0.409453	-17.0722	2.38904e-65	1.12709e-61
comp2254966_c0_seq1	151.35	-7.40076	0.436078	-16.9712	1.34184e-64	5.62706e-61
comp2250225_c0_seq2	4722.82	-6.10735	0.394897	-15.4657	5.91357e-54	2.2319e-50
comp2233645_c0_seq1	69.6171	-9.27313	0.602075	-15.4019	1.58809e-53	5.44887e-50
comp2262279_c0_seq1	11965.3	-8.79004	0.579775	-15.1611	6.39669e-52	2.01187e-48
comp2272108_c0_seq1	2995.14	-5.17674	0.342926	-15.0958	1.72537e-51	5.00915e-48
comp2275713_c0_seq3	26150.7	-5.83114	0.388556	-15.0072	6.58538e-51	1.77532e-47
isotig10568	3256.76	7.02144	0.470154	14.9344	1.96966e-50	4.95592e-47
comp2215885_c0_seq1	296.876	-8.43813	0.567661	-14.8647	5.58456e-50	1.31733e-46
comp2234324_c0_seq2	4423.94	-8.38738	0.577914	-14.5132	9.99439e-48	2.21887e-44
gnl|Pdu_trscr_assembly_1|1218	398.855	-3.15308	0.223104	-14.1328	2.38621e-45	5.00335e-42
comp2240916_c0_seq1	1065.28	5.49451	0.389655	14.101	3.74623e-45	7.44159e-42
comp2224089_c0_seq1	660.552	-4.8973	0.348034	-14.0713	5.69886e-45	1.07543e-41
comp2256337_c0_seq2	359.485	-5.73487	0.40885	-14.0268	1.06835e-44	1.92008e-41
comp2257772_c0_seq1	124.443	-8.30259	0.610073	-13.6092	3.53186e-42	6.05906e-39
comp2236959_c0_seq1	1122.83	-5.57213	0.413167	-13.4864	1.88103e-41	3.08669e-38
comp2234463_c0_seq2	256.642	-8.0981	0.605551	-13.3731	8.68543e-41	1.32012e-37
comp2261608_c0_seq1	3608.59	-7.03432	0.526026	-13.3726	8.74436e-41	1.32012e-37
comp2268687_c0_seq1	3902.01	-6.72024	0.505153	-13.3034	2.21283e-40	3.21218e-37
comp2271537_c0_seq19	1250.25	-3.81271	0.289572	-13.1667	1.36377e-39	1.90634e-36
comp2258675_c0_seq3	527.406	-4.36526	0.333044	-13.1072	2.99569e-39	4.03797e-36
comp2269108_c0_seq5	88.62	-3.79614	0.292482	-12.979	1.60892e-38	2.09392e-35
comp2242933_c0_seq1	26670.4	-5.36366	0.415198	-12.9183	3.54734e-38	4.46279e-35
comp2256041_c0_seq1	33311.8	-3.29595	0.257042	-12.8226	1.22499e-37	1.49141e-34
comp2245447_c0_seq1	112.839	-7.59114	0.594762	-12.7633	2.62762e-37	3.09912e-34
comp2272119_c0_seq6	321.046	-4.38843	0.345015	-12.7196	4.60457e-37	5.26624e-34
comp2261876_c0_seq1	1236.94	4.17368	0.329382	12.6712	8.53615e-37	9.47563e-34
comp2253014_c0_seq2	7025.59	-1.89699	0.150374	-12.6151	1.74288e-36	1.87942e-33
comp2270387_c0_seq54	1285.89	-2.89641	0.230007	-12.5927	2.31543e-36	2.42747e-33
comp2262137_c0_seq3	731.127	6.07294	0.483866	12.5509	3.93089e-36	4.00972e-33
comp2232214_c0_seq1	60.2078	-7.8197	0.630053	-12.4112	2.27299e-35	2.25756e-32
comp2229575_c0_seq1	1319.3	1.88331	0.152275	12.3679	3.90065e-35	3.77483e-32
comp2235052_c0_seq1	502.802	-7.07893	0.573	-12.3541	4.62665e-35	4.36547e-32
comp2205302_c0_seq1	523.253	-4.08474	0.33232	-12.2916	1.00489e-34	9.2504e-32
comp2271249_c0_seq23	1879.11	-5.72729	0.470224	-12.1799	3.97682e-34	3.57365e-31
comp2262443_c0_seq1	4613.05	-4.3636	0.360171	-12.1154	8.75852e-34	7.68753e-31
comp2275741_c0_seq1	4437.22	-3.14738	0.266288	-11.8195	3.09687e-32	2.65641e-29
comp2252195_c0_seq1	638.469	-5.82903	0.493383	-11.8144	3.2889e-32	2.75843e-29
comp2272343_c0_seq3	910.497	4.92593	0.417183	11.8076	3.56589e-32	2.92574e-29
comp2272370_c0_seq4	521.22	-3.24972	0.275728	-11.786	4.6104e-32	3.70225e-29
comp2267304_c0_seq3	1248.01	-4.34315	0.372332	-11.6647	1.93037e-31	1.51784e-28
comp2269146_c0_seq1	28359.9	-2.82977	0.244835	-11.5579	6.73433e-31	5.18708e-28
comp2116603_c0_seq1	47.27	-6.98605	0.606121	-11.5258	9.7777e-31	7.3806e-28
comp2272698_c0_seq4	4611.09	-3.03014	0.264932	-11.4374	2.71923e-30	2.01233e-27
comp2272249_c0_seq2	350.769	-3.79002	0.333345	-11.3697	5.92172e-30	4.29803e-27
comp2256943_c0_seq2	58.1874	-4.9688	0.438999	-11.3185	1.06282e-29	7.56846e-27
comp2255923_c0_seq3	535.151	-5.17404	0.45958	-11.2582	2.11051e-29	1.47509e-26
comp2276390_c2_seq3	2706.74	-3.06829	0.275971	-11.1182	1.02371e-28	7.02489e-26
comp2278475_c0_seq14	3679.02	-2.18231	0.196346	-11.1146	1.06513e-28	7.17857e-26
comp2261851_c1_seq1	1383.24	3.80426	0.34291	11.0941	1.34047e-28	8.8758e-26
comp2244589_c0_seq2	6458.2	-5.09972	0.459999	-11.0864	1.4609e-28	9.50643e-26
comp2264786_c0_seq1	363.582	-3.7752	0.341242	-11.0631	1.89443e-28	1.21186e-25
comp2241380_c0_seq2	46.9025	-4.73433	0.428522	-11.048	2.24051e-28	1.40935e-25
comp2264540_c1_seq15	295.345	-3.32837	0.303628	-10.962	5.81992e-28	3.60091e-25
comp2269234_c0_seq4	193.379	3.87661	0.357447	10.8453	2.09997e-27	1.27834e-24
gnl|Pdu_trscr_assembly_1|1213	28496.3	-4.23159	0.390676	-10.8315	2.4423e-27	1.46313e-24
comp2264517_c0_seq6	207.841	-3.2322	0.299732	-10.7836	4.11275e-27	2.42536e-24
comp2267782_c1_seq1	92.8812	-4.27914	0.397017	-10.7782	4.36106e-27	2.53223e-24
gnl|Pdu_trscr_assembly_1|88882	255.379	-4.7172	0.438649	-10.7539	5.67948e-27	3.2478e-24
comp2255868_c0_seq1	95.3363	-3.97576	0.37124	-10.7094	9.19428e-27	5.17926e-24
comp2247098_c0_seq1	732.576	5.24386	0.4916	10.6669	1.45359e-26	7.96769e-24
comp2270561_c0_seq2	567.525	-4.19506	0.393334	-10.6654	1.47776e-26	7.96769e-24
comp2277584_c0_seq5	872.307	-3.9689	0.372095	-10.6664	1.46251e-26	7.96769e-24
comp2273076_c1_seq5	1614.09	-2.39012	0.224208	-10.6603	1.56073e-26	8.29648e-24
comp2273601_c1_seq1	263.573	-3.83997	0.36035	-10.6562	1.631e-26	8.54962e-24
comp2272756_c0_seq1	414.932	-5.27431	0.497305	-10.6058	2.80085e-26	1.44808e-23
comp2221300_c0_seq1	154.58	-3.98516	0.377517	-10.5563	4.75252e-26	2.42392e-23
comp2277610_c1_seq3	1815.36	-3.25136	0.308854	-10.5272	6.47596e-26	3.25888e-23
comp2261193_c1_seq4	83.1194	-4.65839	0.443226	-10.5102	7.75378e-26	3.85057e-23
comp2267592_c0_seq1	271.225	-3.4414	0.328076	-10.4896	9.63927e-26	4.72475e-23
comp2273207_c0_seq5	904.488	-3.72686	0.355981	-10.4693	1.19565e-25	5.78543e-23
comp2254414_c0_seq1	440.354	-2.52531	0.241282	-10.4662	1.23464e-25	5.89848e-23
comp2254367_c0_seq1	565.227	2.7137	0.260341	10.4236	1.93403e-25	9.12429e-23
comp2277815_c1_seq2	853.597	-4.14971	0.398375	-10.4166	2.08312e-25	9.70629e-23
comp2254431_c0_seq4	116.789	-2.45491	0.235798	-10.4111	2.20692e-25	1.01577e-22
comp2277776_c0_seq1	1674.08	-4.11846	0.395909	-10.4026	2.41385e-25	1.09763e-22
comp2272379_c0_seq9	3099.63	-4.19117	0.402953	-10.4011	2.44979e-25	1.10072e-22
comp2261980_c0_seq3	6477.25	4.71494	0.454537	10.373	3.28866e-25	1.46024e-22
comp2278392_c0_seq1	1817.81	-3.54257	0.341646	-10.3691	3.42664e-25	1.50381e-22
comp2271713_c0_seq1	2437.78	4.59831	0.445532	10.321	5.66523e-25	2.45767e-22
comp2280824_c0_seq1	1593.78	-3.39757	0.330528	-10.2792	8.74223e-25	3.74942e-22
comp2219247_c0_seq1	98.6642	-4.76714	0.464616	-10.2604	1.06284e-24	4.50715e-22
comp2266373_c0_seq1	161.065	-3.40942	0.332684	-10.2482	1.20541e-24	5.05496e-22
comp2263873_c0_seq9	1607.79	4.33911	0.423675	10.2416	1.29071e-24	5.35317e-22
comp1192611_c0_seq1	411.044	-3.73129	0.366486	-10.1813	2.40435e-24	9.8636e-22
comp2261501_c0_seq1	502.825	3.91502	0.386712	10.1239	4.32994e-24	1.75721e-21
comp2273459_c1_seq1	174.928	-4.17941	0.414033	-10.0944	5.84976e-24	2.34874e-21
comp2042029_c0_seq1	1209.06	-4.10307	0.40673	-10.088	6.24546e-24	2.48122e-21
comp2268735_c0_seq1	151.996	4.63638	0.460237	10.0739	7.2078e-24	2.83372e-21
comp2261606_c0_seq1	253.132	-3.07929	0.305899	-10.0664	7.77903e-24	3.02677e-21
comp2269247_c0_seq1	4332.18	-3.11977	0.309984	-10.0643	7.94638e-24	3.06033e-21
comp1946763_c1_seq1	21.5045	-5.15865	0.514105	-10.0342	1.07792e-23	4.10937e-21
comp2224365_c0_seq1	24.5778	-5.56327	0.554814	-10.0273	1.15672e-23	4.36571e-21
comp2260095_c1_seq1	100.225	-4.40803	0.440224	-10.0132	1.33434e-23	4.9862e-21
comp2260377_c0_seq3	400.89	-2.70433	0.271134	-9.97415	1.97779e-23	7.31822e-21
comp2257715_c1_seq3	2503.48	-3.32952	0.33402	-9.96803	2.10369e-23	7.70848e-21
comp2243368_c0_seq4	440.433	3.88356	0.391321	9.92424	3.26589e-23	1.18521e-20
comp2269191_c0_seq3	427.183	-4.81867	0.485871	-9.91759	3.4909e-23	1.25479e-20
comp2252709_c0_seq3	437.359	-2.68568	0.270985	-9.9108	3.7363e-23	1.33034e-20
comp2273791_c0_seq4	870.576	-4.11649	0.417125	-9.8687	5.68979e-23	2.00695e-20
comp2264636_c0_seq1	925.109	1.79603	0.182345	9.84959	6.88263e-23	2.40522e-20
comp2263195_c0_seq3	261.416	-6.19654	0.629845	-9.83819	7.70826e-23	2.65899e-20
comp2273978_c0_seq1	1675.33	-3.68952	0.375041	-9.83765	7.7497e-23	2.65899e-20
comp2269751_c0_seq2	280.657	-3.44766	0.350971	-9.82321	8.94526e-23	3.04155e-20
comp2238682_c0_seq2	241.692	-5.42088	0.551916	-9.82194	9.05864e-23	3.0526e-20
comp2261071_c0_seq1	260.676	-4.74544	0.483395	-9.81691	9.52177e-23	3.18027e-20
comp2275270_c0_seq2	9713.57	-3.95657	0.404282	-9.78664	1.28489e-22	4.2539e-20
comp2280841_c0_seq1	431.088	-4.92424	0.506008	-9.73154	2.21227e-22	7.26049e-20
comp2209056_c0_seq1	404.939	-6.04908	0.622469	-9.71788	2.5299e-22	8.23134e-20
comp2267655_c0_seq21	7639.54	-3.79333	0.390516	-9.71364	2.63748e-22	8.50802e-20
comp2259403_c0_seq2	494.958	4.12429	0.425223	9.69914	3.0406e-22	9.72527e-20
comp2200316_c0_seq1	1097.07	-3.65209	0.378723	-9.64315	5.25476e-22	1.6666e-19
comp2277992_c0_seq1	1023.91	-3.89948	0.40463	-9.63714	5.57193e-22	1.75246e-19
comp2268100_c0_seq1	65.1758	-6.12495	0.635881	-9.63221	5.84564e-22	1.82336e-19
comp2261841_c0_seq9	101.534	3.52133	0.365662	9.63001	5.97233e-22	1.84761e-19
comp2281046_c0_seq1	263.147	4.3747	0.454643	9.62228	6.43869e-22	1.97568e-19
comp2282195_c0_seq2	4525.83	-3.29373	0.34281	-9.60803	7.39495e-22	2.25081e-19
comp2141958_c0_seq2	127.122	-6.40564	0.667209	-9.60066	7.94356e-22	2.39845e-19
comp2273366_c2_seq1	239.526	-3.47186	0.362151	-9.58678	9.08788e-22	2.72218e-19
comp2261795_c0_seq1	185.922	3.1851	0.334555	9.52039	1.72529e-21	5.12724e-19
comp2267875_c0_seq5	1551.16	-2.34267	0.24611	-9.5188	1.75185e-21	5.16548e-19
comp2261322_c0_seq1	19.5825	-5.65454	0.597987	-9.45597	3.20044e-21	9.33169e-19
comp2275310_c0_seq1	1222.01	-3.57935	0.378546	-9.45552	3.21424e-21	9.33169e-19
comp2266942_c0_seq1	50.088	-5.01143	0.530497	-9.44668	3.4976e-21	1.00768e-18
comp2270372_c0_seq1	1375.29	-3.05258	0.323265	-9.44294	3.62473e-21	1.0364e-18
comp2274563_c1_seq9	767.181	-2.58727	0.274078	-9.43988	3.7321e-21	1.05907e-18
comp2236891_c0_seq1	241.935	3.05641	0.323851	9.43773	3.80951e-21	1.07297e-18
comp2202652_c0_seq2	424.192	-4.10607	0.435838	-9.42111	4.4635e-21	1.24786e-18
comp2273726_c1_seq7	831.231	2.42539	0.257483	9.41962	4.52741e-21	1.25542e-18
comp2277114_c0_seq12	1452.54	-2.99265	0.317727	-9.41893	4.55705e-21	1.25542e-18
comp1193006_c0_seq1	80.4783	-4.77268	0.50678	-9.41764	4.61328e-21	1.2617e-18
comp2268528_c0_seq2	498.607	2.98257	0.316855	9.41305	4.81959e-21	1.30864e-18
comp2275350_c0_seq1	1873.65	-2.27814	0.242711	-9.38622	6.21904e-21	1.67656e-18
comp2266185_c0_seq3	207.184	-4.83352	0.516966	-9.34978	8.78306e-21	2.35099e-18
comp2274900_c0_seq10	485.353	-3.21696	0.34418	-9.34674	9.03942e-21	2.40258e-18
comp2246299_c0_seq1	109.076	-4.39696	0.471394	-9.32757	1.08326e-20	2.85904e-18
comp2253691_c1_seq1	3609.73	-2.97371	0.318914	-9.32448	1.1153e-20	2.92318e-18
comp2252936_c1_seq1	788.515	-3.27841	0.351738	-9.3206	1.15682e-20	3.01108e-18
comp2258211_c0_seq1	28.6992	-4.86258	0.521797	-9.31893	1.17521e-20	3.03801e-18
comp2259241_c0_seq1	102.199	-3.5943	0.385779	-9.31698	1.19694e-20	3.07312e-18
comp2276257_c0_seq6	560.819	-2.50405	0.269282	-9.29899	1.41782e-20	3.61563e-18
comp2276174_c0_seq14	706.843	-2.88122	0.311375	-9.25321	2.17856e-20	5.51834e-18
comp2258266_c0_seq1	198.55	-3.27518	0.354229	-9.24595	2.33169e-20	5.86683e-18
comp2275743_c0_seq2	3431.66	-2.67359	0.289742	-9.22747	2.77109e-20	6.92626e-18
comp2275017_c0_seq4	376.045	-4.16561	0.45304	-9.19479	3.75729e-20	9.32946e-18
comp2232271_c0_seq1	221.162	-4.25447	0.463594	-9.17715	4.42663e-20	1.09196e-17
comp2248585_c0_seq2	144.219	3.43519	0.374461	9.17368	4.57127e-20	1.12032e-17
comp2268979_c0_seq1	964.821	-3.02461	0.329982	-9.166	4.90883e-20	1.19528e-17
comp2273459_c0_seq2	626.853	-4.26793	0.467611	-9.12709	7.03655e-20	1.70239e-17
comp2260003_c0_seq1	148.637	-4.05298	0.444596	-9.11611	7.78686e-20	1.86494e-17
comp2263738_c0_seq2	1015.53	-1.61859	0.177558	-9.11583	7.80725e-20	1.86494e-17
comp2263706_c0_seq2	71.4057	-4.0908	0.449972	-9.09123	9.79216e-20	2.32438e-17
comp2138076_c0_seq1	607.959	-3.93367	0.43346	-9.07505	1.13621e-19	2.68018e-17
comp2270000_c0_seq4	1012.85	-4.56949	0.503725	-9.07139	1.17504e-19	2.75456e-17
comp1933325_c0_seq2	1832.39	2.89022	0.319678	9.04104	1.55194e-19	3.61564e-17
comp2236994_c0_seq1	67.5404	-5.12332	0.568955	-9.0048	2.16058e-19	5.00274e-17
comp2274959_c0_seq5	4452.81	-2.85631	0.317322	-9.00128	2.23105e-19	5.13441e-17
comp2277987_c1_seq1	3211.14	-3.27616	0.364391	-8.99079	2.45467e-19	5.6148e-17
comp2257694_c0_seq1	71.2911	3.54935	0.396662	8.94804	3.61837e-19	8.22679e-17
comp2270003_c1_seq1	142.269	-3.91944	0.438241	-8.94357	3.76794e-19	8.51555e-17
comp2271221_c0_seq2	168.969	-2.97746	0.333915	-8.91682	4.79877e-19	1.07807e-16
comp2256699_c0_seq2	73.5186	3.67565	0.414027	8.8778	6.81972e-19	1.52302e-16
comp1927618_c0_seq1	325.28	-3.29334	0.371424	-8.86682	7.52677e-19	1.67103e-16
comp1194608_c0_seq1	1093.33	-3.11756	0.351918	-8.85879	8.08908e-19	1.77499e-16
comp2242307_c0_seq1	35.8591	-4.28574	0.483762	-8.8592	8.05942e-19	1.77499e-16
gnl|Pdu_trscr_assembly_1|20388	2090.52	3.72805	0.421586	8.84292	9.32516e-19	2.0344e-16
comp2260546_c0_seq1	299.599	-3.25996	0.368791	-8.83958	9.60823e-19	2.0841e-16
gnl|Pdu_trscr_assembly_1|10810	2785.23	-1.73118	0.19597	-8.83394	1.01055e-18	2.17945e-16
comp2241134_c0_seq1	974.418	2.34814	0.266144	8.82283	1.11599e-18	2.39317e-16
comp2252381_c0_seq5	166.717	3.91552	0.44397	8.81934	1.15134e-18	2.45502e-16
comp2258209_c0_seq1	753.643	-1.95133	0.221875	-8.79472	1.43406e-18	3.04069e-16
comp2277335_c1_seq5	725.924	-2.52949	0.287842	-8.78778	1.52547e-18	3.21645e-16
comp2245203_c0_seq1	135.11	-4.06763	0.463415	-8.77753	1.67108e-18	3.50389e-16
comp2276099_c0_seq2	317.092	2.14985	0.244975	8.77581	1.69671e-18	3.53798e-16
comp2248955_c0_seq1	73.1604	-5.45004	0.621093	-8.77492	1.71019e-18	3.54649e-16
comp2238321_c0_seq1	22.5861	-5.17053	0.58937	-8.77298	1.73997e-18	3.58852e-16
comp2275022_c0_seq1	4722.03	-2.49162	0.284987	-8.74292	2.27168e-18	4.65966e-16
comp2276664_c0_seq46	11933.1	-3.16617	0.362206	-8.74135	2.30333e-18	4.69905e-16
comp2258775_c0_seq1	37.4835	-3.87468	0.44344	-8.73777	2.37757e-18	4.82443e-16
comp2271937_c0_seq1	53.0849	-3.59787	0.412202	-8.72841	2.58274e-18	5.21271e-16
comp2247744_c0_seq2	234.987	2.98543	0.342652	8.71271	2.96691e-18	5.95624e-16
comp2272093_c0_seq1	1250.48	2.65428	0.304933	8.70445	3.19124e-18	6.37268e-16
comp2251620_c0_seq1	5987.92	2.87338	0.330384	8.69708	3.40547e-18	6.7647e-16
comp1194202_c0_seq1	362.334	3.04082	0.350281	8.6811	3.91953e-18	7.74508e-16
comp2265937_c0_seq5	1694.53	2.45499	0.282984	8.67537	4.12205e-18	8.10284e-16
comp2254530_c0_seq1	1063.19	3.92427	0.45412	8.64149	5.54866e-18	1.08506e-15
comp2239858_c0_seq1	1186.69	-3.74311	0.434108	-8.62253	6.54931e-18	1.27414e-15
comp2266106_c0_seq2	663.002	-2.98346	0.346032	-8.6219	6.58517e-18	1.27455e-15
gnl|Pdu_trscr_assembly_1|7284	321.158	-4.14149	0.480507	-8.61899	6.75447e-18	1.30065e-15
comp2270999_c0_seq5	536.949	-2.87948	0.334475	-8.60894	7.37374e-18	1.41269e-15
comp2261344_c0_seq3	562.531	-2.62118	0.304791	-8.59991	7.97796e-18	1.52073e-15
comp2239558_c0_seq1	55.9617	-3.54211	0.412163	-8.59396	8.40247e-18	1.59066e-15
comp2264887_c0_seq4	98.8714	-5.67355	0.660236	-8.59321	8.45725e-18	1.59066e-15
comp2277282_c0_seq11	25853.2	-3.66988	0.427077	-8.59302	8.47127e-18	1.59066e-15
comp2239531_c0_seq1	565.635	-3.07121	0.357582	-8.58881	8.78723e-18	1.64182e-15
comp2271417_c0_seq5	283.879	-2.49071	0.290824	-8.56433	1.08708e-17	2.02112e-15
comp2273540_c0_seq2	791.425	2.36512	0.27672	8.54699	1.26339e-17	2.3374e-15
comp2276143_c1_seq1	149.759	3.64753	0.427309	8.53603	1.38913e-17	2.5575e-15
comp2260667_c0_seq3	42.9614	-2.54697	0.298641	-8.52853	1.4822e-17	2.71558e-15
comp2253407_c0_seq3	13532.6	3.92943	0.46079	8.5276	1.4941e-17	2.72417e-15
comp2254647_c0_seq2	1603.63	-2.52843	0.297459	-8.50008	1.89456e-17	3.42128e-15
comp2270003_c0_seq1	308.474	-4.24312	0.499175	-8.50026	1.89168e-17	3.42128e-15
comp2267731_c0_seq5	138.834	3.58568	0.422756	8.48169	2.21942e-17	3.98882e-15
comp2276523_c0_seq2	34629.9	-2.54874	0.301012	-8.46725	2.51244e-17	4.49406e-15
comp2257310_c0_seq1	79.4118	3.88259	0.459022	8.4584	2.71067e-17	4.82576e-15
comp2257406_c0_seq1	117.817	-5.95283	0.704447	-8.45036	2.90399e-17	5.14566e-15
comp2275616_c0_seq2	759.464	3.01598	0.357068	8.44652	3.0011e-17	5.29288e-15
comp2273939_c0_seq1	227.931	-3.34365	0.396264	-8.43794	3.22976e-17	5.66965e-15
comp1194044_c0_seq1	139.9	2.92627	0.347077	8.43119	3.4217e-17	5.97879e-15
comp2176475_c0_seq1	34.2412	-4.1803	0.496013	-8.4278	3.52239e-17	6.12636e-15
comp2250762_c0_seq1	302.849	4.30323	0.510706	8.42604	3.57569e-17	6.19053e-15
comp2247702_c0_seq1	30.6288	-5.88685	0.699355	-8.41755	3.84443e-17	6.62052e-15
comp2256548_c0_seq1	38.1931	-3.87427	0.460286	-8.4171	3.85913e-17	6.62052e-15
comp2250283_c0_seq1	33.6963	-5.07364	0.603405	-8.40836	4.158e-17	7.10096e-15
comp2263586_c0_seq1	576.59	-2.25007	0.267841	-8.40074	4.43672e-17	7.54282e-15
comp2252998_c0_seq2	568.678	-4.02077	0.480562	-8.36679	5.92069e-17	1.00206e-14
comp2239992_c0_seq1	315.012	-2.34219	0.27996	-8.36615	5.95324e-17	1.00307e-14
comp2276795_c0_seq4	1038.62	-2.57159	0.307806	-8.35459	6.56592e-17	1.10138e-14
comp2257274_c0_seq1	120.647	3.47771	0.417572	8.32841	8.19356e-17	1.36514e-14
comp2277510_c0_seq2	622.595	2.67063	0.320674	8.32816	8.21068e-17	1.36514e-14
comp2266776_c0_seq2	416.511	-3.22747	0.387782	-8.32288	8.58478e-17	1.42108e-14
comp2254279_c0_seq1	326.638	-4.53961	0.546048	-8.31357	9.28682e-17	1.53058e-14
comp2234282_c0_seq1	2181.91	-3.27035	0.394649	-8.28672	1.1641e-16	1.91024e-14
comp2268869_c0_seq6	493.08	4.06049	0.491737	8.25744	1.48827e-16	2.43161e-14
comp2266909_c1_seq3	293.198	-3.18122	0.385848	-8.24475	1.6551e-16	2.69254e-14
comp2253317_c0_seq1	1161.86	-2.50587	0.304651	-8.22538	1.94576e-16	3.1518e-14
comp2275659_c1_seq6	3571.96	-2.57646	0.31367	-8.21393	2.14073e-16	3.4528e-14
comp2255435_c0_seq1	1668.6	-4.76249	0.579918	-8.21236	2.16885e-16	3.48326e-14
comp2272828_c0_seq8	945.451	-2.6319	0.320505	-8.21171	2.18053e-16	3.48719e-14
comp2264911_c0_seq3	429.71	-4.62369	0.563123	-8.2108	2.1972e-16	3.49902e-14
comp2272319_c0_seq24	41850.7	-3.01244	0.366925	-8.20996	2.21257e-16	3.5087e-14
comp2259786_c0_seq4	354.07	2.96629	0.361354	8.20882	2.23373e-16	3.52742e-14
comp2222258_c0_seq1	368.889	-1.44968	0.176706	-8.20388	2.32755e-16	3.66027e-14
comp1267867_c0_seq1	153.711	3.9263	0.478763	8.20093	2.38534e-16	3.73558e-14
comp2263124_c0_seq2	2096.14	-3.56108	0.434555	-8.19478	2.51057e-16	3.91545e-14
comp2276073_c1_seq1	583.658	-3.82971	0.467688	-8.18859	2.64303e-16	4.10507e-14
comp2267039_c0_seq7	197.935	3.47355	0.424225	8.188	2.65612e-16	4.10849e-14
comp2236889_c0_seq1	96.7218	-3.01703	0.368708	-8.18269	2.77578e-16	4.27605e-14
comp2276419_c0_seq10	674.814	-2.31384	0.282797	-8.18199	2.79205e-16	4.28364e-14
comp2268819_c2_seq1	1085.9	-4.1421	0.506283	-8.18139	2.80595e-16	4.28753e-14
comp2269151_c0_seq2	85.7786	-3.60698	0.442699	-8.1477	3.70901e-16	5.64458e-14
comp2253831_c0_seq1	290.3	3.00215	0.368944	8.13716	4.04644e-16	6.13337e-14
comp2275901_c0_seq1	278.338	1.90868	0.2346	8.13592	4.08813e-16	6.17177e-14
comp2272814_c1_seq2	2673.53	-2.86549	0.35278	-8.1226	4.56302e-16	6.86126e-14
comp2261738_c0_seq5	911.578	-2.1907	0.269736	-8.12165	4.59894e-16	6.88783e-14
comp2267745_c0_seq3	55.9236	-2.97939	0.36787	-8.09901	5.54067e-16	8.26546e-14
comp2277237_c0_seq2	906.836	-1.77743	0.22017	-8.073	6.85927e-16	1.01922e-13
comp2240347_c0_seq3	188.427	-3.70157	0.4587	-8.06969	7.04786e-16	1.0398e-13
comp2278099_c2_seq1	308.625	2.96247	0.367115	8.0696	7.05288e-16	1.0398e-13
comp2226073_c0_seq2	43.6566	-4.62844	0.574542	-8.05588	7.89122e-16	1.15887e-13
comp2267504_c3_seq1	159.334	1.86984	0.232148	8.0545	7.98043e-16	1.16743e-13
comp2232850_c0_seq1	15.9158	-4.47746	0.557022	-8.0382	9.1167e-16	1.3285e-13
comp2249950_c0_seq1	52.6166	-3.44228	0.429465	-8.01529	1.09881e-15	1.59505e-13
comp2274541_c0_seq1	26893.4	3.70656	0.46257	8.01298	1.1196e-15	1.619e-13
comp2272075_c0_seq4	206.989	-3.70973	0.463135	-8.01004	1.14672e-15	1.65189e-13
comp2270520_c0_seq5	1848.67	-3.3388	0.417378	-7.99947	1.24958e-15	1.79321e-13
comp2266416_c0_seq4	103.377	3.00739	0.376473	7.98833	1.36781e-15	1.95545e-13
comp2272553_c0_seq5	855.956	2.42493	0.304513	7.96332	1.6749e-15	2.38543e-13
comp2276244_c0_seq1	2015.38	2.36474	0.297127	7.9587	1.73859e-15	2.46684e-13
comp2270752_c0_seq7	472.571	-3.78277	0.476075	-7.94575	1.93019e-15	2.72844e-13
comp2266655_c1_seq2	96.1532	3.04093	0.382955	7.94071	2.0102e-15	2.83093e-13
comp2254383_c0_seq1	4477.07	3.44651	0.434352	7.93483	2.10786e-15	2.95743e-13
comp2262714_c0_seq1	256.086	-3.31024	0.417424	-7.93016	2.18871e-15	3.05066e-13
comp2266966_c1_seq7	7576.42	-4.08143	0.514678	-7.93006	2.19047e-15	3.05066e-13
comp2253348_c0_seq1	45.3615	-3.87442	0.488659	-7.92867	2.21496e-15	3.07343e-13
comp2261491_c0_seq1	3493.88	3.81992	0.482053	7.92428	2.29476e-15	3.16599e-13
comp2267927_c0_seq4	114.817	3.69782	0.466656	7.92408	2.29845e-15	3.16599e-13
comp2265504_c0_seq1	110.928	-2.97472	0.376286	-7.90548	2.66911e-15	3.66319e-13
comp2276641_c1_seq16	5582.87	-4.38385	0.554668	-7.90357	2.71027e-15	3.7062e-13
comp2276446_c0_seq2	2497.04	-2.32105	0.294138	-7.89104	2.99674e-15	4.08314e-13
comp2269014_c0_seq1	74.4003	3.03539	0.385452	7.8749	3.41028e-15	4.62988e-13
comp2277510_c3_seq1	192.162	2.05682	0.26139	7.86877	3.58145e-15	4.84485e-13
comp2261061_c0_seq1	124.017	-3.05788	0.390273	-7.83522	4.68004e-15	6.30836e-13
comp2262537_c0_seq3	64.9692	-4.09155	0.523142	-7.82111	5.23586e-15	7.03245e-13
comp2257855_c0_seq2	56.3092	-4.34556	0.555673	-7.82034	5.26793e-15	7.05043e-13
comp2236155_c0_seq1	401.095	-3.73551	0.478241	-7.81092	5.67706e-15	7.57115e-13
comp2254406_c0_seq1	155.286	3.14371	0.403422	7.79261	6.56383e-15	8.72296e-13
comp2259280_c0_seq3	92.6831	-4.29124	0.550972	-7.78849	6.78145e-15	8.98054e-13
comp2268243_c0_seq2	88.5948	-2.97817	0.382467	-7.78675	6.8756e-15	9.07339e-13
comp2272437_c1_seq1	17038.2	3.21101	0.412639	7.78165	7.15875e-15	9.41413e-13
comp2273485_c0_seq5	1589.19	-2.54658	0.328077	-7.76213	8.35137e-15	1.09443e-12
comp2268827_c0_seq4	82.1843	-2.34029	0.301595	-7.75972	8.51183e-15	1.1116e-12
comp2221859_c0_seq1	45.7832	-4.83464	0.623261	-7.757	8.69595e-15	1.12867e-12
comp2248121_c0_seq5	13.906	-4.18978	0.540135	-7.75691	8.7023e-15	1.12867e-12
comp2254625_c0_seq1	244.542	-2.09829	0.270523	-7.75643	8.73513e-15	1.12905e-12
comp2276495_c0_seq1	118.906	-2.40986	0.310937	-7.75034	9.16472e-15	1.18053e-12
comp2259351_c0_seq1	162.895	2.09836	0.27082	7.74814	9.32452e-15	1.19703e-12
comp2276073_c0_seq1	181.606	-3.59507	0.464512	-7.73944	9.9852e-15	1.2775e-12
comp2257429_c0_seq1	156.161	2.81032	0.363161	7.73849	1.00605e-14	1.28279e-12
comp2265006_c0_seq2	596.637	-1.96445	0.253871	-7.73801	1.00985e-14	1.28329e-12
comp2254606_c0_seq2	132.247	-2.77236	0.358455	-7.73421	1.04051e-14	1.31782e-12
comp2259648_c0_seq1	54.0616	3.64725	0.471687	7.73236	1.05572e-14	1.33261e-12
comp2275593_c0_seq1	1046.64	-3.53771	0.458511	-7.71565	1.20364e-14	1.51426e-12
comp2274915_c0_seq1	253.423	-2.26307	0.293488	-7.71095	1.24887e-14	1.56595e-12
comp2259757_c0_seq3	60.4757	-4.43435	0.575172	-7.70961	1.26203e-14	1.5772e-12
comp2278279_c1_seq4	6265.16	-2.74271	0.356156	-7.70088	1.35134e-14	1.68324e-12
comp2274439_c0_seq36	1786.82	-3.35612	0.436089	-7.69596	1.40438e-14	1.74356e-12
comp2278290_c0_seq15	4734.41	-2.69191	0.350122	-7.68851	1.48863e-14	1.84209e-12
comp2268858_c0_seq10	1576.2	1.93216	0.251626	7.6787	1.60712e-14	1.98222e-12
comp2276368_c0_seq9	2777.51	-1.9987	0.260525	-7.67183	1.69563e-14	2.08458e-12
comp2236259_c0_seq1	27257.5	2.36955	0.309238	7.66257	1.82255e-14	2.23333e-12
comp2253924_c0_seq2	961.531	-3.36091	0.438835	-7.65871	1.87816e-14	2.29403e-12
comp2254640_c0_seq1	3621.72	3.7741	0.493044	7.65469	1.93775e-14	2.35918e-12
comp2233130_c0_seq1	18.7829	-3.71504	0.486076	-7.64292	2.12348e-14	2.57699e-12
comp2277689_c0_seq2	8791.56	-2.08381	0.272795	-7.63875	2.19334e-14	2.65324e-12
comp2257653_c0_seq2	112.403	3.60414	0.472552	7.62697	2.40332e-14	2.89796e-12
comp2269922_c0_seq1	37.5556	-4.66186	0.612273	-7.61403	2.65683e-14	3.19344e-12
comp2267061_c1_seq8	1204.58	-3.67247	0.482702	-7.60815	2.78044e-14	3.3314e-12
comp2262901_c0_seq1	676.677	-1.85312	0.243803	-7.60087	2.94147e-14	3.51319e-12
comp2277984_c0_seq7	796.19	-2.35155	0.309717	-7.59258	3.13587e-14	3.73357e-12
comp2246063_c0_seq1	185.815	2.34468	0.308896	7.59052	3.18629e-14	3.78166e-12
comp2257668_c0_seq1	32.7166	-3.73984	0.492837	-7.58839	3.23916e-14	3.83236e-12
comp2265611_c0_seq1	170.743	3.76405	0.496712	7.57793	3.51124e-14	4.12839e-12
comp2270100_c0_seq3	878.518	-2.46886	0.325781	-7.5783	3.50102e-14	4.12839e-12
gnl|Pdu_trscr_assembly_1|7133	231.585	-1.98862	0.262469	-7.57661	3.54707e-14	4.15756e-12
comp2275110_c1_seq5	31229.8	-2.99348	0.395741	-7.56425	3.9012e-14	4.55848e-12
comp2273919_c0_seq1	1884.66	-2.71977	0.359592	-7.56348	3.92416e-14	4.57117e-12
comp2275773_c0_seq15	330.532	-2.16238	0.286235	-7.55458	4.20227e-14	4.88006e-12
comp2258311_c0_seq2	28.8703	-4.41915	0.585154	-7.55212	4.28227e-14	4.95772e-12
comp2259017_c0_seq2	390.782	1.91045	0.253605	7.53319	4.95144e-14	5.7149e-12
comp2267703_c0_seq2	68.69	3.24901	0.431541	7.52886	5.11853e-14	5.88975e-12
comp2274834_c0_seq1	42.4128	-3.17167	0.42157	-7.52348	5.33381e-14	6.1188e-12
comp2273152_c0_seq2	1460.17	-1.87583	0.250332	-7.49338	6.71241e-14	7.67696e-12
comp2262844_c0_seq2	87.9836	-3.54202	0.47339	-7.48225	7.30615e-14	8.33077e-12
comp2253194_c0_seq3	31.3144	-3.44167	0.460954	-7.46641	8.241e-14	9.36843e-12
comp2246605_c0_seq1	5105.31	1.95868	0.262477	7.46227	8.5046e-14	9.63905e-12
comp2266655_c0_seq4	217.219	3.19203	0.427816	7.46122	8.57265e-14	9.6871e-12
comp2273171_c1_seq1	134.094	2.64503	0.355074	7.44923	9.38868e-14	1.05775e-11
comp2232805_c0_seq1	3237.38	-3.12425	0.41947	-7.44809	9.47002e-14	1.06374e-11
comp2264429_c0_seq2	86.4958	-2.76761	0.372403	-7.43176	1.07164e-13	1.20017e-11
comp2251791_c0_seq2	430.434	3.63233	0.489206	7.42494	1.12831e-13	1.2599e-11
comp2274137_c0_seq1	4991.52	2.95253	0.397975	7.41889	1.18105e-13	1.3149e-11
comp2275883_c1_seq1	1003.96	-2.76938	0.373611	-7.41247	1.23967e-13	1.3761e-11
comp2275540_c0_seq12	1796.2	-2.09559	0.282798	-7.4102	1.26106e-13	1.39574e-11
comp2270986_c0_seq3	69.4532	-3.42752	0.463387	-7.39667	1.39646e-13	1.54109e-11
comp2263702_c0_seq1	433.355	-3.38986	0.458601	-7.39175	1.44914e-13	1.59456e-11
comp2259418_c0_seq1	191.57	2.19049	0.296557	7.38643	1.50828e-13	1.65482e-11
comp2273154_c0_seq3	397.784	-2.4575	0.33283	-7.38364	1.54025e-13	1.68255e-11
gene19	105.614	-3.43089	0.464673	-7.38344	1.54248e-13	1.68255e-11
comp2266901_c1_seq8	498.25	-2.5165	0.341058	-7.3785	1.60085e-13	1.74119e-11
gnl|Pdu_trscr_assembly_1|1902	1088.95	-2.7257	0.36967	-7.37332	1.66424e-13	1.80494e-11
comp2269927_c0_seq1	98.9077	2.99713	0.406525	7.37257	1.67376e-13	1.81006e-11
comp2268625_c0_seq3	293.752	2.21545	0.300584	7.37048	1.70015e-13	1.83335e-11
comp2268018_c0_seq3	72.1667	-3.73721	0.50787	-7.35861	1.85836e-13	1.99824e-11
comp2277455_c0_seq2	221.068	2.08006	0.282971	7.35078	1.97055e-13	2.11285e-11
comp2238985_c0_seq1	219.958	3.22963	0.439414	7.34985	1.98422e-13	2.12149e-11
comp2225064_c0_seq1	222.682	-2.99982	0.408183	-7.34921	1.99384e-13	2.12574e-11
comp2275024_c0_seq2	204.505	2.03881	0.277463	7.34805	2.01115e-13	2.13816e-11
comp2271848_c0_seq8	1027.16	2.58672	0.352322	7.34191	2.10569e-13	2.22614e-11
comp2278062_c0_seq4	4285.68	-4.13936	0.56379	-7.34203	2.10377e-13	2.22614e-11
comp2278536_c1_seq38	16022.8	2.30997	0.314885	7.3359	2.20231e-13	2.32178e-11
comp2277815_c0_seq5	3596.28	-3.24728	0.442795	-7.33359	2.2406e-13	2.35557e-11
gene17	104250	-2.69082	0.367235	-7.32725	2.34928e-13	2.46296e-11
comp2272887_c0_seq5	168.382	-2.867	0.39143	-7.32442	2.39943e-13	2.50857e-11
comp2262211_c0_seq21	25522	-2.22353	0.303646	-7.32279	2.42863e-13	2.53208e-11
comp2257070_c0_seq2	279584	1.99162	0.272237	7.31578	2.55893e-13	2.66058e-11
comp2248818_c0_seq1	50.4342	-3.92393	0.536496	-7.31401	2.59294e-13	2.68854e-11
comp2276707_c0_seq1	846.55	-2.7146	0.371226	-7.31251	2.62199e-13	2.71121e-11
comp2270871_c0_seq1	678.919	3.13165	0.428464	7.30901	2.69123e-13	2.7752e-11
comp2263172_c0_seq5	483.422	-1.98676	0.272548	-7.28959	3.10903e-13	3.18862e-11
comp2277610_c0_seq1	432.76	-3.46193	0.474913	-7.28961	3.10847e-13	3.18862e-11
comp2271953_c0_seq4	1332.49	1.33263	0.18283	7.2889	3.12506e-13	3.19637e-11
comp2251993_c0_seq1	260.244	3.22026	0.441847	7.28819	3.14147e-13	3.20446e-11
comp2272387_c1_seq3	190.195	2.14555	0.294569	7.2837	3.24798e-13	3.30418e-11
comp2275646_c0_seq3	512.31	1.58975	0.218565	7.27356	3.50135e-13	3.55237e-11
comp2276996_c0_seq5	5399.9	-1.8337	0.252406	-7.26488	3.73372e-13	3.77796e-11
comp2269305_c0_seq1	2884.73	1.33837	0.184289	7.26234	3.80457e-13	3.83936e-11
comp2247082_c0_seq2	2395.94	2.45321	0.338097	7.25595	3.9884e-13	4.01414e-11
comp2199263_c0_seq2	1900.29	3.10161	0.427488	7.25542	4.00405e-13	4.01917e-11
comp2253589_c0_seq1	598.161	-4.40418	0.607159	-7.25376	4.05365e-13	4.05817e-11
comp2272396_c0_seq2	936.634	-2.54335	0.350895	-7.24819	4.22388e-13	4.2174e-11
comp2276124_c0_seq3	2833.25	-2.85762	0.394418	-7.24517	4.31911e-13	4.30111e-11
comp2264803_c1_seq1	83.1012	2.68442	0.371495	7.226	4.97421e-13	4.94044e-11
comp2259832_c0_seq2	1444.44	-2.48186	0.343883	-7.21714	5.30905e-13	5.25917e-11
comp2267375_c0_seq3	145.424	-2.40137	0.332849	-7.21461	5.40874e-13	5.34389e-11
comp2271710_c1_seq4	4597.32	-1.81824	0.25228	-7.20724	5.70981e-13	5.62663e-11
comp2266841_c0_seq1	444.864	3.38482	0.470159	7.19931	6.05179e-13	5.94809e-11
comp2261589_c0_seq1	45.5686	-2.91825	0.405458	-7.1974	6.13727e-13	6.01643e-11
comp2277060_c0_seq17	138.996	2.68741	0.37349	7.19539	6.22812e-13	6.08968e-11
comp2265722_c0_seq1	231.562	2.52166	0.350993	7.18434	6.75318e-13	6.586e-11
comp2250174_c0_seq1	368.224	-2.98261	0.415663	-7.17555	7.20178e-13	7.0054e-11
comp2253801_c0_seq1	484.526	-3.18801	0.444365	-7.17431	7.26738e-13	7.05104e-11
comp2262137_c0_seq4	5311.86	2.79765	0.390152	7.17068	7.46269e-13	7.22197e-11
comp2273169_c2_seq2	1932.35	-2.61919	0.365466	-7.16671	7.68204e-13	7.41524e-11
comp2274386_c1_seq3	410.778	-2.018	0.281626	-7.1655	7.75009e-13	7.46183e-11
comp2243948_c0_seq4	167.611	-2.58901	0.361544	-7.16097	8.01094e-13	7.69335e-11
comp2277945_c0_seq2	7794.32	1.92044	0.268225	7.15983	8.07752e-13	7.7376e-11
comp2275643_c1_seq4	299.431	-3.86949	0.540776	-7.15544	8.34031e-13	7.9527e-11
comp2275871_c0_seq1	327.23	-1.65493	0.231285	-7.15538	8.3442e-13	7.9527e-11
comp2247108_c0_seq2	19.1285	-3.76629	0.527485	-7.14008	9.32741e-13	8.86738e-11
comp2272887_c1_seq2	650.668	-3.31396	0.464346	-7.13685	9.5497e-13	9.0559e-11
comp2270061_c0_seq1	148.841	-3.37565	0.473135	-7.13465	9.70335e-13	9.17855e-11
comp2259852_c1_seq1	621.099	-2.39807	0.336616	-7.12407	1.04789e-12	9.88736e-11
comp1956628_c0_seq1	79.6712	-3.58428	0.503389	-7.1203	1.07694e-12	1.01361e-10
comp2138995_c0_seq1	215.305	-3.10134	0.435661	-7.11869	1.08954e-12	1.02292e-10
comp2262129_c0_seq3	300.112	-3.15993	0.444124	-7.11497	1.11938e-12	1.04833e-10
comp2274588_c0_seq5	2670.74	-1.56438	0.220075	-7.10837	1.17421e-12	1.09696e-10
comp2277503_c1_seq4	270.87	-2.21188	0.311312	-7.10503	1.20293e-12	1.12101e-10
comp2268582_c0_seq4	92.909	2.77661	0.391161	7.09837	1.26238e-12	1.17352e-10
comp2242437_c0_seq2	33.8872	-2.91176	0.410461	-7.09388	1.30402e-12	1.20925e-10
comp2266075_c0_seq5	546.07	-3.12886	0.441431	-7.088	1.36067e-12	1.25869e-10
comp2253589_c1_seq2	303.372	-1.41482	0.199756	-7.08272	1.41349e-12	1.30435e-10
comp2278332_c0_seq1	745.933	2.42758	0.342848	7.08064	1.43493e-12	1.32091e-10
comp2270604_c0_seq3	4541.65	1.94974	0.275629	7.07381	1.50733e-12	1.38418e-10
comp2272356_c0_seq4	942.52	-1.94778	0.275609	-7.06718	1.58119e-12	1.44848e-10
comp2255195_c0_seq2	35.8005	-2.23889	0.316905	-7.06487	1.60763e-12	1.46914e-10
comp2272428_c0_seq1	1110.58	-1.97517	0.280207	-7.04898	1.80237e-12	1.64312e-10
comp2267666_c0_seq3	183.298	-2.38043	0.337869	-7.04542	1.84908e-12	1.68163e-10
comp2277010_c0_seq2	336.564	3.01473	0.428222	7.04012	1.92077e-12	1.74264e-10
comp1195550_c0_seq2	18.4161	-3.52695	0.501137	-7.03789	1.95168e-12	1.76221e-10
comp2184756_c0_seq1	25.7268	-4.42138	0.628219	-7.03796	1.95071e-12	1.76221e-10
gnl|Pdu_trscr_assembly_1|13616	222.065	2.55907	0.363669	7.03683	1.96665e-12	1.77149e-10
comp1174362_c0_seq1	84.3194	-3.51891	0.501155	-7.02159	2.1935e-12	1.97112e-10
comp2254291_c0_seq1	8.40458	-4.42087	0.630299	-7.01393	2.3171e-12	2.07725e-10
comp2260219_c0_seq1	47.5168	-4.07174	0.580747	-7.01121	2.36266e-12	2.11307e-10
comp2252902_c0_seq1	33.0804	-3.77012	0.53834	-7.00324	2.50114e-12	2.23163e-10
comp2271756_c0_seq2	1767.85	-3.48629	0.498224	-6.99745	2.6067e-12	2.32034e-10
gnl|Pdu_trscr_assembly_1|86887	3338.82	-2.73386	0.390721	-6.99695	2.61593e-12	2.32307e-10
comp2227525_c0_seq3	13.1023	-3.64433	0.52093	-6.99581	2.63722e-12	2.33648e-10
comp2276930_c1_seq2	590.1	-1.78736	0.255534	-6.99462	2.65978e-12	2.35095e-10
comp2276641_c0_seq2	4176.84	-2.82662	0.404219	-6.99279	2.69477e-12	2.37631e-10
comp2278398_c0_seq2	374.568	3.30495	0.473631	6.97791	2.99614e-12	2.63591e-10
comp2248557_c0_seq1	43.4566	-3.74314	0.536631	-6.97526	3.05309e-12	2.67976e-10
comp2271317_c1_seq3	361.275	-2.93166	0.420354	-6.97426	3.07478e-12	2.69254e-10
comp2221142_c0_seq1	2871.61	3.19289	0.458327	6.9664	3.2515e-12	2.8407e-10
comp2271099_c0_seq5	58.7167	-2.18673	0.314006	-6.96397	3.30807e-12	2.88345e-10
comp2278282_c0_seq5	908.079	-3.26013	0.469139	-6.94918	3.67421e-12	3.19521e-10
comp2252017_c0_seq1	39.8186	3.22604	0.464329	6.94774	3.71195e-12	3.22061e-10
comp2244207_c0_seq1	223.845	-2.51802	0.362693	-6.94257	3.85034e-12	3.33302e-10
comp2264626_c0_seq3	278.162	-1.49707	0.215943	-6.9327	4.12883e-12	3.55931e-10
comp2268972_c0_seq3	333.327	-2.97336	0.428893	-6.93264	4.13061e-12	3.55931e-10
comp2266208_c1_seq3	136.676	2.25902	0.326004	6.92943	4.22549e-12	3.63276e-10
comp2243810_c0_seq2	1964.52	-2.5672	0.370572	-6.92767	4.2782e-12	3.6614e-10
comp2273249_c0_seq4	7052.16	3.3474	0.483181	6.92783	4.27349e-12	3.6614e-10
gnl|Pdu_trscr_assembly_1|760	340.29	-2.37618	0.343274	-6.92211	4.44964e-12	3.79951e-10
comp2275488_c0_seq1	1059.19	-1.87126	0.270597	-6.9153	4.66882e-12	3.97767e-10
comp2268642_c0_seq2	103.504	-2.51361	0.36351	-6.91484	4.6838e-12	3.98144e-10
comp2277837_c0_seq3	171.026	2.46118	0.356488	6.90396	5.05727e-12	4.28925e-10
comp2268816_c0_seq17	239.99	-2.49899	0.36221	-6.89929	5.22643e-12	4.41289e-10
comp2273445_c0_seq4	85.3629	-2.93865	0.425918	-6.89957	5.21601e-12	4.41289e-10
comp2252351_c0_seq1	37.5204	-2.42996	0.352308	-6.89727	5.30109e-12	4.46593e-10
comp1194082_c0_seq1	394.219	2.08702	0.302718	6.89428	5.41374e-12	4.54056e-10
comp2276761_c0_seq5	269.182	2.71296	0.393499	6.89444	5.40759e-12	4.54056e-10
comp2262834_c0_seq3	176.479	-3.65488	0.530337	-6.89162	5.51619e-12	4.61623e-10
comp2279734_c0_seq1	168.447	2.18195	0.316649	6.89076	5.54934e-12	4.6337e-10
comp2271592_c0_seq12	152.476	3.14811	0.456885	6.89038	5.56435e-12	4.63597e-10
comp2276904_c0_seq6	797.602	-3.05731	0.443733	-6.88997	5.58035e-12	4.63907e-10
comp2261649_c0_seq2	168.647	2.89155	0.419817	6.88764	5.67266e-12	4.70544e-10
comp2138971_c0_seq1	448.971	1.83607	0.266652	6.88566	5.75209e-12	4.75045e-10
comp2264343_c0_seq3	121.396	-4.48743	0.651681	-6.88593	5.7412e-12	4.75045e-10
comp2269818_c0_seq2	286.99	2.17346	0.315681	6.88499	5.779e-12	4.76225e-10
comp2246453_c0_seq1	639.842	3.33988	0.485206	6.88343	5.84278e-12	4.79388e-10
comp2277921_c0_seq1	2741.15	-2.09194	0.303902	-6.88361	5.83531e-12	4.79388e-10
comp2250674_c0_seq3	101.49	2.2655	0.329531	6.87491	6.20269e-12	5.07813e-10
comp2142646_c0_seq4	23375.5	3.40375	0.495419	6.87045	6.40004e-12	5.22836e-10
comp2271380_c0_seq2	173.732	-2.04811	0.298177	-6.86875	6.4766e-12	5.27948e-10
comp2265366_c0_seq1	326.532	-2.18758	0.318717	-6.86372	6.70907e-12	5.45719e-10
comp2271837_c0_seq3	170.821	-2.5379	0.370242	-6.85472	7.14538e-12	5.79959e-10
gnl|Pdu_trscr_assembly_1|6033	77.826	-3.21551	0.469128	-6.85422	7.17041e-12	5.80742e-10
comp2276165_c0_seq6	5342.74	-2.89681	0.422671	-6.85359	7.2019e-12	5.82043e-10
comp2274586_c0_seq4	546.95	-2.10819	0.308101	-6.84254	7.78004e-12	6.27423e-10
comp1196706_c0_seq1	2565.08	1.70115	0.248744	6.83897	7.97661e-12	6.41905e-10
comp2246491_c0_seq2	240.345	2.62318	0.384032	6.83061	8.4553e-12	6.77537e-10
comp2258180_c0_seq1	67.9712	-3.40426	0.498373	-6.83075	8.44718e-12	6.77537e-10
comp2244718_c0_seq4	34.8708	3.26648	0.478469	6.82693	8.67487e-12	6.93659e-10
comp2269391_c0_seq1	437.819	2.32144	0.340126	6.82526	8.77673e-12	7.0032e-10
comp1981288_c0_seq1	314.8	1.46771	0.215077	6.8241	8.84775e-12	7.04498e-10
comp2265255_c2_seq1	28601.3	3.44474	0.505155	6.81916	9.15719e-12	7.27602e-10
comp2266805_c1_seq1	99.8252	2.22912	0.327012	6.81662	9.32079e-12	7.39045e-10
comp2139506_c0_seq1	253.928	-3.26386	0.480076	-6.79864	1.05608e-11	8.35609e-10
comp2226803_c0_seq1	70.1349	-3.92701	0.57769	-6.79777	1.0625e-11	8.3893e-10
comp2252742_c0_seq1	102.82	-4.71718	0.694263	-6.79451	1.08682e-11	8.56341e-10
comp2254333_c0_seq1	238.989	1.5335	0.226079	6.78304	1.17673e-11	9.24153e-10
comp2268302_c0_seq1	2688.63	-4.09062	0.603078	-6.78291	1.17778e-11	9.24153e-10
comp2259602_c0_seq3	55.0395	-1.91762	0.282935	-6.7776	1.22191e-11	9.5679e-10
comp2201258_c0_seq1	41.9277	-3.17727	0.469337	-6.76969	1.29055e-11	1.00845e-09
comp2276257_c2_seq1	94.45	-2.87302	0.424501	-6.768	1.30579e-11	1.01824e-09
comp2194038_c0_seq1	17.6738	-4.58241	0.677415	-6.76455	1.33725e-11	1.04063e-09
comp2266348_c1_seq2	1401.96	-2.11281	0.312395	-6.76327	1.34911e-11	1.0477e-09
comp2254433_c0_seq1	279.156	3.25037	0.48105	6.75682	1.41052e-11	1.09314e-09
comp2273696_c0_seq2	109.019	-2.38816	0.353654	-6.75283	1.44993e-11	1.12138e-09
comp2263229_c0_seq2	396.771	3.08567	0.457098	6.75056	1.47276e-11	1.1367e-09
comp2274248_c0_seq12	206.202	-3.59606	0.533134	-6.74514	1.52884e-11	1.17758e-09
gnl|Pdu_trscr_assembly_1|945	98.1613	2.767	0.410486	6.74081	1.57511e-11	1.21075e-09
comp2270680_c0_seq2	404.988	-2.09634	0.311416	-6.73165	1.67755e-11	1.28687e-09
comp2273199_c1_seq30	3046.97	-1.93774	0.28819	-6.72384	1.76999e-11	1.35503e-09
comp2028238_c0_seq1	167.427	1.76763	0.262925	6.72296	1.78075e-11	1.36051e-09
comp2271608_c1_seq1	184.876	-2.36099	0.351384	-6.71911	1.82837e-11	1.39406e-09
comp2273699_c0_seq8	77.3451	-2.63198	0.39189	-6.71612	1.86628e-11	1.42011e-09
comp2210398_c0_seq1	57.8054	-3.70781	0.552319	-6.71316	1.90454e-11	1.4463e-09
comp2250842_c0_seq2	70.237	-3.05102	0.454552	-6.71215	1.91772e-11	1.45338e-09
comp2269661_c1_seq3	875.69	1.11919	0.166781	6.71056	1.93881e-11	1.4639e-09
comp2275031_c2_seq2	144.741	2.98941	0.445481	6.71052	1.93935e-11	1.4639e-09
comp2258876_c0_seq1	70.5401	3.33698	0.497327	6.70982	1.94867e-11	1.468e-09
comp2256831_c0_seq1	446.779	2.68248	0.400053	6.7053	2.00994e-11	1.51114e-09
comp2278512_c0_seq10	12158.8	-2.21854	0.330991	-6.70272	2.04569e-11	1.53496e-09
comp2243381_c1_seq2	21.9393	-4.54785	0.678544	-6.70236	2.05074e-11	1.5357e-09
comp2271808_c0_seq3	377.217	-3.01177	0.449525	-6.69989	2.08578e-11	1.55885e-09
comp2239691_c0_seq1	15900.3	3.12948	0.46781	6.68965	2.2371e-11	1.66863e-09
comp2274657_c0_seq1	1161.53	-1.83647	0.274803	-6.68284	2.34359e-11	1.74174e-09
comp2279767_c0_seq1	362.723	-1.81441	0.271505	-6.68279	2.34435e-11	1.74174e-09
comp2266311_c1_seq2	146.671	2.40412	0.360419	6.67034	2.55213e-11	1.89238e-09
comp2263921_c0_seq2	3386.87	1.87411	0.280993	6.6696	2.56506e-11	1.89824e-09
comp2222124_c0_seq1	93.3941	1.85898	0.279099	6.66062	2.72671e-11	2.01392e-09
comp2261379_c0_seq1	100876	2.14494	0.322067	6.6599	2.74015e-11	2.0199e-09
comp1194190_c0_seq1	211.764	1.50738	0.226743	6.64796	2.97193e-11	2.18648e-09
comp2255979_c2_seq1	13.0466	-3.22912	0.486235	-6.64106	3.11442e-11	2.27799e-09
comp2260860_c0_seq2	853.806	2.21911	0.334128	6.6415	3.10503e-11	2.27799e-09
comp2277503_c0_seq1	541.422	-2.12194	0.319514	-6.64115	3.11254e-11	2.27799e-09
comp2271992_c0_seq4	393.888	-3.29368	0.496043	-6.63991	3.13872e-11	2.29133e-09
comp2268999_c0_seq1	828.844	-2.37558	0.357793	-6.63954	3.14673e-11	2.29274e-09
comp2277022_c0_seq15	305.89	-2.4821	0.37388	-6.63876	3.16339e-11	2.29845e-09
gi|146189532|emb|AM697680.1|_Platynereis_dumerilii_mRNA_for_hypothetical_protein_(ORF1),_isolate_8	11.628	-4.20136	0.632868	-6.6386	3.16675e-11	2.29845e-09
comp2246956_c0_seq1	212.516	2.4779	0.373389	6.63624	3.21781e-11	2.33103e-09
comp2273491_c0_seq12	135.471	2.31061	0.348438	6.63134	3.32643e-11	2.4051e-09
comp2253186_c0_seq1	4995.79	2.67406	0.403365	6.62937	3.37113e-11	2.43276e-09
comp2237419_c0_seq1	78.1676	2.71434	0.410139	6.6181	3.6385e-11	2.62069e-09
comp1368210_c0_seq1	181.596	-3.2033	0.484154	-6.6163	3.68304e-11	2.64772e-09
comp2268497_c0_seq1	346.933	1.50432	0.227385	6.61575	3.69684e-11	2.65259e-09
comp2261787_c0_seq1	210.386	-2.7062	0.409366	-6.61071	3.82475e-11	2.73916e-09
comp2259694_c0_seq2	116.831	2.88646	0.436968	6.60565	3.95784e-11	2.82911e-09
comp2262558_c0_seq2	126.444	-1.86519	0.282951	-6.59192	4.34188e-11	3.09775e-09
comp2259637_c0_seq1	35.0304	3.28585	0.498695	6.58889	4.43117e-11	3.1555e-09
comp2272223_c0_seq1	34.7552	-2.48915	0.377987	-6.58528	4.54036e-11	3.22716e-09
comp2267710_c1_seq1	105.208	3.28345	0.49875	6.58335	4.5996e-11	3.26312e-09
comp2273103_c0_seq8	627.981	2.22968	0.338727	6.58251	4.62563e-11	3.27543e-09
comp2273626_c1_seq1	2498.62	-1.9324	0.293947	-6.57398	4.89888e-11	3.46242e-09
comp2265254_c0_seq1	604.562	2.98902	0.454912	6.57053	5.0136e-11	3.53688e-09
comp2267157_c0_seq3	528.214	-3.40875	0.519221	-6.56513	5.19867e-11	3.6606e-09
comp2267868_c0_seq12	108.189	2.61375	0.398144	6.56484	5.20899e-11	3.66104e-09
comp2252595_c0_seq1	23.5047	-4.40115	0.670708	-6.56195	5.311e-11	3.7258e-09
comp2268642_c1_seq1	168.072	-2.04613	0.311946	-6.55923	5.40862e-11	3.78724e-09
comp2277700_c0_seq9	1217.37	1.02988	0.157388	6.54357	6.00659e-11	4.19816e-09
comp2272059_c1_seq1	3475.94	-1.54077	0.235549	-6.54119	6.10332e-11	4.25788e-09
comp1195529_c0_seq1	71.8896	-3.40634	0.522095	-6.52436	6.82926e-11	4.75554e-09
comp2243025_c0_seq2	1108.27	1.87005	0.287085	6.51392	7.32128e-11	5.08876e-09
comp2269401_c0_seq1	826.772	-1.73623	0.266573	-6.51317	7.35814e-11	5.10498e-09
comp2277538_c1_seq1	258.731	2.62786	0.403979	6.50494	7.77268e-11	5.38269e-09
comp2268128_c0_seq11	382.592	-2.07734	0.319418	-6.50352	7.84627e-11	5.4237e-09
gnl|Pdu_trscr_assembly_1|91632	574.987	-2.95443	0.454579	-6.49926	8.07153e-11	5.56227e-09
comp2275945_c0_seq4	1458.22	-2.40873	0.370621	-6.49917	8.07622e-11	5.56227e-09
comp2266932_c0_seq2	2435.41	-1.84034	0.283529	-6.49084	8.53618e-11	5.86835e-09
comp2263299_c0_seq2	66.3952	-2.64728	0.408114	-6.48662	8.77835e-11	6.02386e-09
comp2263395_c0_seq1	79.9769	-1.779	0.274413	-6.48293	8.99608e-11	6.16207e-09
comp2265966_c0_seq2	390.013	-2.92245	0.451022	-6.4796	9.19648e-11	6.28793e-09
comp2272968_c0_seq3	98.7498	3.55302	0.54838	6.47912	9.22604e-11	6.29673e-09
comp2277760_c0_seq2	243.012	-1.82519	0.281847	-6.47583	9.42951e-11	6.42398e-09
comp2253327_c0_seq1	37.0105	-2.23512	0.345867	-6.46237	1.03078e-10	7.00966e-09
comp2274018_c0_seq2	404.858	-2.19356	0.339472	-6.46169	1.03537e-10	7.02826e-09
comp2264799_c1_seq2	441.377	2.07739	0.321846	6.4546	1.08505e-10	7.34357e-09
comp2269865_c0_seq6	1576.34	-1.70697	0.264462	-6.45451	1.08572e-10	7.34357e-09
comp2277297_c1_seq4	365.403	-1.94573	0.301465	-6.45424	1.08766e-10	7.34357e-09
comp2214176_c0_seq1	144.713	2.15682	0.334261	6.45251	1.10009e-10	7.40102e-09
comp2277143_c0_seq2	153.022	-2.57869	0.399636	-6.4526	1.09945e-10	7.40102e-09
comp2202319_c1_seq1	82.4835	2.62636	0.40738	6.44695	1.14125e-10	7.66427e-09
comp1984701_c0_seq1	1616.82	1.70996	0.265346	6.44424	1.16179e-10	7.78835e-09
comp2198530_c0_seq1	53.9986	-2.36628	0.367601	-6.43709	1.21784e-10	8.14961e-09
comp2232773_c0_seq1	125.597	1.71199	0.265998	6.43611	1.22574e-10	8.17351e-09
comp2278595_c0_seq12	1971.34	2.16553	0.336456	6.43628	1.22438e-10	8.17351e-09
comp2193521_c0_seq1	29.0764	3.44623	0.536011	6.42939	1.28114e-10	8.51281e-09
comp2221608_c0_seq2	33.7836	2.54127	0.39525	6.42954	1.27991e-10	8.51281e-09
comp2257762_c0_seq1	142.029	1.96522	0.305979	6.42273	1.33851e-10	8.87839e-09
comp2241847_c0_seq5	73.1341	2.51265	0.391446	6.41889	1.37274e-10	9.08947e-09
comp2273202_c0_seq1	49.6311	-3.15969	0.49262	-6.41406	1.41694e-10	9.36571e-09
comp2251106_c0_seq1	23023.7	3.16313	0.493204	6.41343	1.42281e-10	9.38804e-09
comp2264585_c0_seq1	49.3777	-2.16475	0.337709	-6.41012	1.45407e-10	9.57758e-09
comp2263829_c0_seq1	115.711	3.33682	0.520591	6.40968	1.45822e-10	9.58819e-09
comp2276039_c0_seq1	1609.53	-1.91175	0.298343	-6.40789	1.47548e-10	9.68481e-09
comp2192355_c0_seq1	13.0884	-3.85337	0.601761	-6.40348	1.51874e-10	9.95146e-09
comp2272305_c0_seq1	702.9	-2.06413	0.322671	-6.397	1.58454e-10	1.03646e-08
comp2274279_c0_seq3	1118.06	-1.39168	0.21775	-6.39118	1.64606e-10	1.07484e-08
comp2243104_c0_seq1	153.269	2.45436	0.384336	6.38596	1.70323e-10	1.11025e-08
comp2274596_c1_seq6	328.351	1.77746	0.278406	6.38441	1.72055e-10	1.11961e-08
comp2262000_c0_seq2	179.462	-2.34087	0.366812	-6.38166	1.75175e-10	1.13794e-08
comp2278303_c0_seq3	341.685	-3.22331	0.505361	-6.37824	1.79139e-10	1.1617e-08
comp2239709_c0_seq1	53.524	-3.5931	0.563716	-6.37395	1.8422e-10	1.1926e-08
comp2197371_c0_seq1	36.3204	-4.12939	0.647927	-6.37323	1.8509e-10	1.19618e-08
comp2271893_c0_seq3	253.484	2.37151	0.372376	6.36859	1.90774e-10	1.2308e-08
comp2271554_c1_seq2	146.427	-2.34551	0.368446	-6.36595	1.94091e-10	1.25006e-08
comp2271521_c0_seq3	130.976	-2.9044	0.457284	-6.35142	2.1334e-10	1.3717e-08
comp2267535_c0_seq2	141.788	-1.56451	0.246399	-6.34951	2.16004e-10	1.38411e-08
comp2269979_c1_seq5	1331.71	-2.49704	0.393262	-6.34956	2.15925e-10	1.38411e-08
comp2239692_c0_seq1	77.2189	2.96958	0.468148	6.34325	2.24962e-10	1.43907e-08
comp2265014_c0_seq1	1003.02	-2.73426	0.431608	-6.33504	2.37276e-10	1.51528e-08
comp2277581_c0_seq10	398.839	-2.37763	0.37537	-6.33409	2.38741e-10	1.52206e-08
comp2278064_c1_seq6	182.226	-1.71306	0.270633	-6.32982	2.45448e-10	1.56217e-08
comp2274193_c0_seq5	1678.54	-1.59926	0.252774	-6.32686	2.50198e-10	1.58973e-08
gnl|Pdu_trscr_assembly_1|13513	733.777	-1.72778	0.273102	-6.32651	2.50775e-10	1.59072e-08
comp2270240_c0_seq1	7424.57	-2.74733	0.434347	-6.32518	2.52931e-10	1.6017e-08
comp2232817_c0_seq2	580.956	-2.81129	0.444522	-6.3243	2.5438e-10	1.60818e-08
comp2216809_c0_seq2	57.2812	2.73088	0.431894	6.32302	2.56494e-10	1.61883e-08
comp2269539_c0_seq1	68.8378	3.45291	0.546712	6.31577	2.68814e-10	1.69375e-08
comp2247532_c0_seq3	34.4945	3.23845	0.513236	6.30985	2.79297e-10	1.75687e-08
comp2267007_c0_seq1	1491.92	-2.07249	0.32852	-6.30859	2.81598e-10	1.7684e-08
comp2253903_c0_seq1	313.111	3.14137	0.498115	6.30651	2.85398e-10	1.78929e-08
comp2254339_c0_seq1	110.092	1.9898	0.315629	6.30424	2.89611e-10	1.81268e-08
comp2255979_c1_seq1	19.5088	-3.65208	0.579333	-6.30394	2.9018e-10	1.81324e-08
comp2252899_c0_seq1	1082.91	-1.89195	0.300397	-6.29816	3.01192e-10	1.87894e-08
comp2269929_c1_seq2	619.98	-1.72787	0.274434	-6.29612	3.05183e-10	1.90069e-08
comp2264068_c0_seq1	567.801	1.64824	0.262013	6.29068	3.16078e-10	1.96531e-08
comp2271101_c0_seq1	932.996	-1.93496	0.307608	-6.29035	3.1676e-10	1.96631e-08
comp2266388_c0_seq2	669.936	1.24919	0.198665	6.28792	3.21739e-10	1.99394e-08
comp2241228_c0_seq2	1340.74	2.45178	0.390368	6.28069	3.3707e-10	2.08273e-08
comp2266755_c0_seq1	2139	1.67932	0.267381	6.28065	3.37171e-10	2.08273e-08
comp2270682_c0_seq1	114.68	-3.06818	0.488535	-6.28038	3.37738e-10	2.08283e-08
comp2234888_c0_seq2	25.5448	-2.92943	0.467309	-6.26872	3.64023e-10	2.24126e-08
comp2252193_c0_seq2	552.782	2.65525	0.423654	6.2675	3.66879e-10	2.25517e-08
comp2261825_c0_seq1	259.454	-1.88102	0.300148	-6.26699	3.68098e-10	2.25898e-08
comp2275894_c0_seq1	549.713	-1.72883	0.275941	-6.2652	3.72336e-10	2.28128e-08
comp2273404_c0_seq1	3026.69	-3.46595	0.553593	-6.26082	3.82954e-10	2.34254e-08
comp2274390_c0_seq1	309.555	1.46023	0.233243	6.26055	3.83614e-10	2.34277e-08
comp2269374_c0_seq3	6336.03	1.4876	0.237715	6.25791	3.90164e-10	2.37893e-08
comp2237121_c0_seq1	750.676	-2.31932	0.37088	-6.25356	4.01204e-10	2.4423e-08
comp2272881_c0_seq1	155.684	-2.46468	0.394145	-6.25323	4.02059e-10	2.44356e-08
comp2261373_c0_seq1	24418.6	1.39749	0.223587	6.25033	4.09579e-10	2.48526e-08
comp2262241_c0_seq1	1460.56	2.74676	0.43964	6.24775	4.16412e-10	2.52267e-08
comp2273333_c0_seq5	998.911	-2.04062	0.326733	-6.24554	4.22336e-10	2.55445e-08
comp2261993_c0_seq1	6631.2	1.56599	0.250788	6.24427	4.25775e-10	2.56316e-08
comp2269321_c1_seq1	788.505	1.54284	0.247081	6.24426	4.25812e-10	2.56316e-08
comp2271648_c0_seq1	128.035	2.70271	0.432814	6.24452	4.25107e-10	2.56316e-08
comp2274169_c0_seq6	134.658	2.33383	0.374142	6.23781	4.43749e-10	2.66688e-08
comp2268249_c0_seq4	92.3145	3.20166	0.513602	6.23373	4.55448e-10	2.73283e-08
comp2237365_c0_seq1	17.8963	-3.51071	0.563424	-6.23104	4.63349e-10	2.77583e-08
comp2270281_c0_seq1	142.63	2.08321	0.334375	6.23017	4.65938e-10	2.78692e-08
comp2275732_c0_seq3	179.303	-2.76834	0.444782	-6.22405	4.84492e-10	2.89049e-08
comp2278436_c0_seq3	2988.98	1.52083	0.244351	6.22395	4.84786e-10	2.89049e-08
comp2141714_c0_seq1	653.618	-3.0322	0.487844	-6.21552	5.11561e-10	3.04532e-08
comp2207922_c0_seq1	34.1385	-2.74948	0.442565	-6.2126	5.2114e-10	3.09746e-08
comp2238789_c0_seq1	84.157	-2.75872	0.444187	-6.21073	5.27404e-10	3.12976e-08
comp2267696_c0_seq11	190.475	-3.06389	0.493762	-6.2052	5.46259e-10	3.23656e-08
comp2254354_c0_seq1	55.4286	2.74511	0.442538	6.20311	5.53576e-10	3.27478e-08
comp2258124_c0_seq1	17.265	-4.10202	0.661439	-6.20167	5.58688e-10	3.29984e-08
comp2241111_c0_seq1	27.3655	-2.36569	0.381486	-6.20125	5.60152e-10	3.30332e-08
comp2264128_c0_seq1	117.595	2.19092	0.353679	6.19466	5.84123e-10	3.43931e-08
comp2239524_c0_seq2	31.4351	-2.71013	0.437822	-6.19001	6.01588e-10	3.53663e-08
comp2257854_c0_seq3	573.113	1.96455	0.31754	6.18678	6.1407e-10	3.59879e-08
comp2269959_c0_seq1	290.745	-2.20954	0.357132	-6.18689	6.13609e-10	3.59879e-08
comp2140459_c0_seq2	93.1194	-3.91946	0.633767	-6.18438	6.23476e-10	3.64826e-08
comp2273758_c0_seq1	2373.68	-2.13838	0.346205	-6.17664	6.54812e-10	3.82568e-08
comp2226033_c0_seq1	129.936	-2.41923	0.392122	-6.16959	6.84672e-10	3.99396e-08
comp2276838_c1_seq1	1601.1	1.17828	0.191014	6.16853	6.89281e-10	4.01464e-08
comp2215664_c1_seq1	93.9681	-1.95064	0.316286	-6.16734	6.9449e-10	4.03874e-08
comp2208952_c0_seq1	126.478	1.81974	0.295084	6.16686	6.96605e-10	4.04481e-08
comp2248429_c0_seq1	436.294	1.59335	0.258445	6.16513	7.04261e-10	4.08298e-08
comp2254641_c1_seq1	806.385	2.49164	0.404215	6.16413	7.08696e-10	4.10239e-08
comp2265341_c0_seq2	45.5045	2.45759	0.399125	6.15744	7.39301e-10	4.273e-08
comp2262438_c0_seq2	247.371	-1.9691	0.320056	-6.15235	7.63415e-10	4.40563e-08
comp2277336_c1_seq6	1715.44	-2.27134	0.36943	-6.14824	7.83489e-10	4.51457e-08
comp2258227_c1_seq1	129.083	2.36695	0.385652	6.13752	8.38185e-10	4.82238e-08
comp2241308_c0_seq1	154.998	1.99936	0.325977	6.13345	8.59946e-10	4.94004e-08
comp2275926_c0_seq2	499.969	2.36771	0.386194	6.13089	8.73915e-10	5.01266e-08
comp2250610_c0_seq2	158.715	3.06622	0.500292	6.12885	8.85175e-10	5.06954e-08
comp2260778_c0_seq1	811.437	-3.36224	0.548967	-6.12466	9.08779e-10	5.19684e-08
gnl|Pdu_trscr_assembly_1|17237	2167.41	-1.68022	0.274396	-6.12332	9.16458e-10	5.23282e-08
comp2260195_c0_seq3	9.24029	-3.43334	0.560796	-6.12227	9.2251e-10	5.25942e-08
comp2261881_c0_seq2	360.629	1.37199	0.224393	6.11422	9.70318e-10	5.52364e-08
comp2276865_c1_seq1	244.637	-2.18491	0.357726	-6.10777	1.01032e-09	5.74272e-08
comp2265803_c0_seq1	73.375	2.65248	0.434582	6.10351	1.03761e-09	5.88013e-08
comp2267547_c0_seq1	328.421	-1.39402	0.228389	-6.10369	1.03648e-09	5.88013e-08
comp2268738_c0_seq1	179.189	-3.42349	0.561642	-6.0955	1.09096e-09	6.17318e-08
comp2263235_c1_seq1	42.8334	3.18406	0.522514	6.09373	1.10313e-09	6.23266e-08
comp2267342_c0_seq3	23.3973	2.79685	0.459109	6.0919	1.11576e-09	6.2946e-08
comp1901146_c0_seq1	24.2641	-3.26656	0.536578	-6.08776	1.145e-09	6.44994e-08
comp2267778_c0_seq5	26.5689	-3.18554	0.523516	-6.08491	1.1656e-09	6.55618e-08
comp2273169_c1_seq1	251.701	-2.40217	0.394882	-6.08326	1.17767e-09	6.6142e-08
comp2278291_c0_seq2	115.719	-2.77855	0.456967	-6.08042	1.19871e-09	6.7224e-08
comp2251833_c0_seq1	25.1531	-2.33911	0.384908	-6.07708	1.22392e-09	6.85359e-08
comp2278464_c0_seq2	6608.78	1.78752	0.294849	6.06249	1.34029e-09	7.49411e-08
comp2264254_c0_seq2	63.3013	2.97619	0.49115	6.05963	1.36434e-09	7.61727e-08
comp2274804_c0_seq1	1309.41	1.87244	0.309042	6.05884	1.37104e-09	7.64341e-08
comp2254617_c0_seq2	243.383	-1.90726	0.31483	-6.05806	1.37769e-09	7.66916e-08
comp2234671_c0_seq1	1046.73	-2.06234	0.340526	-6.05634	1.3925e-09	7.74017e-08
comp2277297_c0_seq3	203.477	-1.73453	0.286458	-6.05508	1.40347e-09	7.78965e-08
comp2273352_c0_seq2	2867.94	0.863441	0.142611	6.05453	1.40833e-09	7.80514e-08
comp2253748_c0_seq2	129.984	-2.12203	0.350617	-6.05228	1.42811e-09	7.90321e-08
comp2272127_c0_seq2	285.138	-1.50442	0.248615	-6.05123	1.43747e-09	7.94335e-08
comp2270081_c0_seq3	383.303	-2.25204	0.37225	-6.04981	1.45015e-09	8.00169e-08
comp2260578_c1_seq1	16.6477	-3.22145	0.532709	-6.04729	1.473e-09	8.11593e-08
comp2259973_c0_seq2	254.291	1.89896	0.314126	6.04522	1.4921e-09	8.20915e-08
comp2274834_c1_seq1	25.8757	-2.70435	0.447771	-6.03958	1.54512e-09	8.48851e-08
comp2199259_c0_seq2	152.776	1.6891	0.279743	6.03804	1.55994e-09	8.55746e-08
gnl|Pdu_trscr_assembly_1|15590	1836.8	3.3156	0.549179	6.03738	1.56634e-09	8.56765e-08
comp2269714_c0_seq2	107.784	2.77377	0.459415	6.03762	1.56408e-09	8.56765e-08
comp2250341_c0_seq1	180.862	1.609	0.26652	6.03707	1.56936e-09	8.57176e-08
comp2272814_c0_seq4	1142.84	-2.50347	0.414905	-6.03384	1.6011e-09	8.73246e-08
gnl|Pdu_trscr_assembly_1|7335	194.769	2.79618	0.463445	6.03347	1.60472e-09	8.73959e-08
comp2259861_c0_seq1	126.202	2.40266	0.398655	6.0269	1.67136e-09	9.08938e-08
comp2252443_c0_seq2	17.9568	-3.77399	0.626887	-6.02022	1.74181e-09	9.45889e-08
comp2270156_c0_seq11	3331.49	2.03463	0.338142	6.0171	1.77568e-09	9.62899e-08
comp2270473_c0_seq2	599.116	-2.63082	0.437875	-6.00814	1.8766e-09	1.01616e-07
comp2261623_c0_seq1	80611.4	3.06827	0.511106	6.0032	1.93461e-09	1.04608e-07
comp2257880_c0_seq2	452.053	-2.04596	0.340906	-6.00153	1.95463e-09	1.05539e-07
comp2114676_c0_seq2	57.7081	-2.79886	0.466379	-6.00125	1.95798e-09	1.05569e-07
comp2246287_c0_seq3	76.7057	-2.13171	0.355461	-5.99704	2.00941e-09	1.08187e-07
comp2270283_c0_seq4	718.704	1.85176	0.308949	5.99372	2.05088e-09	1.10263e-07
gnl|Pdu_trscr_assembly_1|91767	267.661	1.49039	0.248733	5.99192	2.07378e-09	1.11177e-07
comp2276199_c1_seq1	42.2643	-2.27002	0.378835	-5.99211	2.07135e-09	1.11177e-07
comp2195144_c0_seq1	63.1882	-2.11338	0.352774	-5.99074	2.08884e-09	1.11826e-07
comp2264330_c2_seq2	79.5626	2.78658	0.465281	5.98901	2.11117e-09	1.12701e-07
comp2275466_c0_seq14	1190.67	-1.94364	0.324533	-5.98905	2.11067e-09	1.12701e-07
gnl|Pdu_trscr_assembly_1|7485	147.757	-1.65627	0.276779	-5.98411	2.17582e-09	1.15988e-07
comp2274736_c0_seq12	217.007	-3.75959	0.628434	-5.98248	2.19765e-09	1.16987e-07
comp2245798_c0_seq1	16.6765	-3.41022	0.570128	-5.98149	2.211e-09	1.17532e-07
comp2200386_c0_seq5	698.188	-2.10261	0.351552	-5.98094	2.21855e-09	1.17767e-07
comp2276495_c1_seq35	744.925	-2.5916	0.433449	-5.97902	2.2448e-09	1.18993e-07
comp2270534_c0_seq1	748.581	-2.0229	0.338391	-5.97801	2.25887e-09	1.19571e-07
comp2279383_c0_seq1	379.331	-2.29413	0.383946	-5.97514	2.29896e-09	1.21523e-07
comp2271093_c0_seq1	2149.22	-1.71459	0.287082	-5.97247	2.33688e-09	1.23355e-07
comp2276258_c0_seq2	5042.96	1.39994	0.23463	5.96658	2.42278e-09	1.2771e-07
comp2226744_c0_seq1	15.5639	-3.24264	0.543502	-5.9662	2.42848e-09	1.27832e-07
comp2274652_c0_seq1	157.84	2.04844	0.343422	5.96479	2.44946e-09	1.28757e-07
comp2263019_c0_seq3	581.865	1.33076	0.223313	5.95916	2.53544e-09	1.33056e-07
gnl|Pdu_trscr_assembly_1|5866	108.144	1.82431	0.306146	5.95897	2.5383e-09	1.33056e-07
gnl|Pdu_trscr_assembly_1|10787	201.857	-2.02976	0.340888	-5.95434	2.61123e-09	1.36689e-07
comp2263235_c0_seq3	19.2437	3.11941	0.523951	5.95362	2.62272e-09	1.37101e-07
comp2272257_c1_seq3	3031.2	1.44498	0.242723	5.9532	2.62951e-09	1.37266e-07
comp2264883_c0_seq3	1135.38	1.40755	0.236471	5.95233	2.64352e-09	1.37806e-07
comp2267586_c4_seq1	23.0088	3.14039	0.527697	5.95113	2.66302e-09	1.38631e-07
comp2138058_c0_seq1	5079.86	3.43795	0.577775	5.95034	2.67593e-09	1.39112e-07
comp2238628_c0_seq1	19.1796	-3.58829	0.603075	-5.94999	2.68164e-09	1.39217e-07
comp2276806_c0_seq3	1545.43	-2.40108	0.404186	-5.94053	2.8411e-09	1.47292e-07
comp2262932_c1_seq1	165.524	1.57869	0.265972	5.93556	2.9284e-09	1.5161e-07
comp2274615_c2_seq13	116.2	-2.39703	0.403863	-5.93525	2.93391e-09	1.51687e-07
comp2273570_c0_seq3	279.146	1.30701	0.220272	5.93364	2.96289e-09	1.52976e-07
comp2198075_c0_seq1	54.1216	-2.37461	0.400299	-5.93209	2.99103e-09	1.54218e-07
gnl|Pdu_trscr_assembly_1|7104	282.099	1.48545	0.25046	5.93086	3.01346e-09	1.55008e-07
comp2270649_c0_seq5	1037.73	-2.38455	0.402061	-5.9308	3.01457e-09	1.55008e-07
comp2220394_c0_seq1	1136.51	2.37092	0.399826	5.92989	3.03146e-09	1.55664e-07
comp2276559_c0_seq10	1601.74	-1.62249	0.273797	-5.9259	3.10598e-09	1.59275e-07
comp2274942_c1_seq1	2151.81	1.08982	0.183976	5.92373	3.14728e-09	1.61173e-07
comp1193815_c0_seq1	23.4198	-3.61791	0.61094	-5.92188	3.18282e-09	1.62772e-07
comp1194329_c0_seq1	1794.94	1.78645	0.301726	5.92076	3.20448e-09	1.63658e-07
comp2263060_c0_seq1	26.948	-3.07299	0.519097	-5.91987	3.22192e-09	1.64327e-07
comp2275683_c0_seq3	1655.56	-1.86674	0.315404	-5.91855	3.24788e-09	1.65427e-07
comp2260530_c0_seq1	151.448	-1.56453	0.264384	-5.91762	3.26637e-09	1.66145e-07
comp2267270_c0_seq1	64.7961	-2.21471	0.374391	-5.91551	3.3085e-09	1.68061e-07
comp2256628_c0_seq2	43.3904	-1.95868	0.331277	-5.91251	3.36927e-09	1.70704e-07
comp2263079_c1_seq1	86.5742	-2.30844	0.390434	-5.9125	3.36957e-09	1.70704e-07
comp2205419_c0_seq2	3425.99	-2.51009	0.424698	-5.91029	3.41508e-09	1.72778e-07
comp2272495_c0_seq1	3738.7	-1.65666	0.280374	-5.90875	3.44718e-09	1.7399e-07
comp2277737_c0_seq3	358.048	1.20251	0.203515	5.9087	3.44826e-09	1.7399e-07
comp2262249_c0_seq1	257.779	1.61628	0.273754	5.90414	3.54492e-09	1.78628e-07
comp2272070_c1_seq2	422.235	1.76228	0.298508	5.90363	3.55583e-09	1.78939e-07
comp2268090_c0_seq2	134.309	-1.66623	0.2824	-5.90027	3.62902e-09	1.82288e-07
comp2268375_c0_seq1	1579.86	2.3393	0.396495	5.89995	3.63617e-09	1.82288e-07
comp2270332_c0_seq1	37.7182	2.9239	0.495583	5.89992	3.63688e-09	1.82288e-07
comp2216126_c0_seq1	197.871	1.60909	0.27284	5.89756	3.68918e-09	1.84664e-07
comp2252416_c0_seq1	51.4496	-1.83935	0.312081	-5.89382	3.77371e-09	1.88646e-07
comp2251242_c0_seq2	12.8983	-3.27856	0.556517	-5.89121	3.83379e-09	1.91395e-07
comp2258733_c0_seq1	39.2388	-3.51061	0.596183	-5.88848	3.89761e-09	1.94324e-07
comp2268232_c0_seq1	51.4577	2.51289	0.426955	5.8856	3.96612e-09	1.97479e-07
comp2271066_c0_seq4	130.226	1.68739	0.286733	5.88489	3.98317e-09	1.97806e-07
comp2277376_c0_seq3	441.207	2.91209	0.494831	5.88502	3.97999e-09	1.97806e-07
comp2267475_c0_seq6	2207.93	-1.74362	0.296425	-5.88218	4.04891e-09	2.00807e-07
comp2222988_c0_seq1	69.0038	2.57737	0.438318	5.88014	4.09917e-09	2.03033e-07
comp2258113_c0_seq1	609.974	1.5187	0.258336	5.87879	4.13276e-09	2.04428e-07
comp2274690_c0_seq14	511.225	1.74861	0.29757	5.87631	4.195e-09	2.07235e-07
comp2207487_c0_seq1	138.431	1.50866	0.257019	5.86983	4.36242e-09	2.15224e-07
comp2270871_c1_seq12	1438.11	2.68279	0.457399	5.86532	4.48273e-09	2.20871e-07
comp2244297_c0_seq1	56.3976	-3.88802	0.663015	-5.86415	4.51429e-09	2.22136e-07
comp2269800_c0_seq22	1231.96	-2.28239	0.389225	-5.86393	4.52035e-09	2.22144e-07
comp2265404_c0_seq3	250.571	-2.88767	0.492509	-5.86319	4.54046e-09	2.22842e-07
comp2248164_c0_seq1	303.128	-1.83353	0.313077	-5.85648	4.72774e-09	2.31733e-07
comp2256027_c0_seq2	75.1583	3.05285	0.521399	5.85511	4.767e-09	2.33354e-07
comp2235330_c0_seq1	12.2831	-2.98962	0.510819	-5.85262	4.839e-09	2.36572e-07
comp2229846_c0_seq1	713.188	-3.57117	0.610503	-5.84955	4.92913e-09	2.40667e-07
comp2252811_c0_seq1	119.016	-1.69448	0.289738	-5.84832	4.96567e-09	2.42137e-07
comp2269213_c0_seq3	410.787	-2.56825	0.439441	-5.84437	5.08496e-09	2.47634e-07
comp2259858_c0_seq2	81.2028	-3.28683	0.562476	-5.84351	5.11137e-09	2.48477e-07
comp2271348_c0_seq1	3052.19	1.24826	0.213619	5.84337	5.11543e-09	2.48477e-07
comp2201594_c0_seq1	93.3503	-2.39308	0.409567	-5.84297	5.12795e-09	2.48765e-07
comp2269153_c0_seq4	196.104	-1.54402	0.264287	-5.84222	5.15106e-09	2.49565e-07
comp2267951_c0_seq1	2539.23	-2.58268	0.442103	-5.8418	5.16407e-09	2.49875e-07
comp2253491_c1_seq2	66.2681	2.73871	0.468873	5.84106	5.18707e-09	2.50502e-07
gnl|Pdu_trscr_assembly_1|19656	179.459	2.44686	0.418915	5.84095	5.1903e-09	2.50502e-07
comp2275489_c0_seq1	84.5932	2.27743	0.390573	5.83101	5.50931e-09	2.65559e-07
comp2274474_c0_seq5	2885.6	1.49243	0.255972	5.83047	5.52731e-09	2.66086e-07
comp2248791_c0_seq4	965.877	-1.01309	0.173789	-5.8294	5.56263e-09	2.67446e-07
comp2262938_c0_seq1	9724.58	-1.76027	0.302027	-5.82817	5.60386e-09	2.69085e-07
comp2264981_c1_seq2	46.2911	2.36881	0.406528	5.82693	5.64558e-09	2.70744e-07
comp2270709_c0_seq3	1290.85	-1.62996	0.279858	-5.82424	5.73719e-09	2.74711e-07
comp2278580_c0_seq11	496.642	1.23399	0.211877	5.82408	5.74286e-09	2.74711e-07
comp2271110_c0_seq3	238.377	1.40988	0.242419	5.81589	6.03104e-09	2.88131e-07
comp2257627_c0_seq2	272.546	-1.6823	0.289324	-5.81461	6.07759e-09	2.89988e-07
comp2246670_c0_seq1	1956.35	-2.35111	0.404722	-5.8092	6.2771e-09	2.99129e-07
comp2258573_c0_seq1	24.6383	-2.53437	0.43633	-5.80839	6.30775e-09	3.00211e-07
comp2277034_c1_seq4	205.415	-2.18626	0.37657	-5.80573	6.40862e-09	3.04627e-07
comp2257799_c0_seq1	126.654	-2.46061	0.424074	-5.80231	6.54057e-09	3.10509e-07
comp2274386_c0_seq5	627.878	-2.56247	0.441688	-5.80154	6.57077e-09	3.1155e-07
gnl|Pdu_trscr_assembly_1|10869	2598.9	-1.82486	0.314748	-5.79784	6.71738e-09	3.18102e-07
comp2259293_c0_seq1	70.8702	2.48964	0.429489	5.79674	6.76165e-09	3.19797e-07
comp2269109_c0_seq7	119.102	1.87349	0.323299	5.7949	6.83609e-09	3.22913e-07
comp2268667_c0_seq1	190.453	-1.50595	0.259982	-5.7925	6.93472e-09	3.27163e-07
comp2276910_c0_seq34	4297.95	-1.89485	0.327273	-5.78982	7.04615e-09	3.32005e-07
comp2261064_c0_seq1	941.104	-2.27928	0.393922	-5.78612	7.20296e-09	3.3897e-07
gnl|Pdu_trscr_assembly_1|16743	116.106	2.69252	0.465426	5.78507	7.24841e-09	3.40684e-07
comp2253273_c0_seq1	384.633	2.50346	0.433348	5.77703	7.60309e-09	3.5691e-07
comp2267553_c0_seq3	129.499	-2.66791	0.461883	-5.77616	7.64261e-09	3.5832e-07
comp2071630_c0_seq1	10.4329	-3.36375	0.582587	-5.77381	7.74993e-09	3.62901e-07
comp2249798_c1_seq1	125.342	-2.27885	0.394703	-5.77358	7.76049e-09	3.62945e-07
comp2229342_c0_seq1	17.1852	-2.82661	0.489675	-5.77242	7.81431e-09	3.65009e-07
comp2276798_c2_seq4	1259.65	-1.87268	0.324466	-5.77157	7.85385e-09	3.66403e-07
comp1193769_c0_seq1	525.386	2.65425	0.459916	5.77117	7.87248e-09	3.66819e-07
comp2258798_c0_seq1	44.128	-2.46097	0.426668	-5.76788	8.02763e-09	3.73587e-07
comp2262029_c0_seq1	38.7178	2.8993	0.502887	5.76531	8.15092e-09	3.78857e-07
comp2269534_c0_seq3	132.754	-1.93172	0.335079	-5.76496	8.16772e-09	3.79171e-07
comp2276434_c0_seq4	304.835	-1.39948	0.242774	-5.76454	8.18822e-09	3.79656e-07
comp2271744_c0_seq3	266.282	2.1697	0.376501	5.7628	8.27302e-09	3.83117e-07
comp2261886_c0_seq2	460.1	-2.59082	0.449652	-5.76183	8.32076e-09	3.84856e-07
comp2267918_c0_seq2	407.329	-2.26198	0.392603	-5.76151	8.33653e-09	3.85113e-07
comp2266783_c2_seq1	82.1701	-1.94238	0.337197	-5.76037	8.39315e-09	3.87254e-07
comp2140636_c0_seq1	273.733	1.39257	0.241776	5.75976	8.42354e-09	3.88182e-07
comp2272875_c0_seq1	199.708	-1.77104	0.307688	-5.75597	8.61446e-09	3.96496e-07
comp2224449_c0_seq1	61.494	-2.42485	0.421352	-5.75492	8.66805e-09	3.98477e-07
comp2270754_c0_seq3	304.344	2.95775	0.51423	5.7518	8.8299e-09	4.05423e-07
comp2275569_c0_seq2	466.002	-3.09109	0.537631	-5.74947	8.95261e-09	4.10558e-07
comp2263277_c0_seq1	636.712	2.79258	0.485833	5.74801	9.02974e-09	4.13593e-07
comp2256945_c0_seq3	22.3905	-3.14296	0.546831	-5.7476	9.05195e-09	4.14108e-07
comp2259353_c0_seq2	175.303	-4.04841	0.704789	-5.74414	9.23888e-09	4.22147e-07
gnl|Pdu_trscr_assembly_1|8076	1183.38	0.775522	0.135066	5.74179	9.36826e-09	4.27542e-07
comp2278219_c1_seq2	4517.56	-1.97556	0.344123	-5.74086	9.41989e-09	4.29378e-07
comp2254385_c0_seq3	100.185	2.43581	0.424568	5.73715	9.6285e-09	4.3783e-07
comp2273269_c0_seq6	71.1628	1.85397	0.323146	5.73724	9.62296e-09	4.3783e-07
comp2276226_c0_seq6	66.6548	-1.47709	0.257498	-5.73634	9.67439e-09	4.39387e-07
comp2240678_c0_seq1	19.3746	-3.51285	0.612525	-5.73502	9.74988e-09	4.42284e-07
comp2272098_c0_seq6	143.174	2.84743	0.496595	5.73391	9.81408e-09	4.44661e-07
comp2277231_c1_seq4	619.749	-1.89667	0.330845	-5.7328	9.87855e-09	4.47046e-07
comp2274048_c0_seq2	933.854	-2.13433	0.372426	-5.73088	9.9913e-09	4.51098e-07
comp2274190_c0_seq1	2399.26	-2.17239	0.379077	-5.73074	9.99958e-09	4.51098e-07
comp2276230_c0_seq1	335.822	1.98857	0.347005	5.73066	1.0004e-08	4.51098e-07
comp2266783_c1_seq1	134.119	-2.16684	0.37881	-5.72011	1.06453e-08	4.79447e-07
comp2248643_c1_seq1	310.226	-3.09255	0.540673	-5.71982	1.06634e-08	4.79688e-07
comp2269619_c0_seq1	1380.85	-2.93056	0.512486	-5.71833	1.07575e-08	4.82846e-07
comp2277598_c0_seq2	182.441	2.80243	0.490081	5.7183	1.07592e-08	4.82846e-07
gnl|Pdu_trscr_assembly_1|95352	56.716	2.50091	0.437401	5.71765	1.08008e-08	4.8414e-07
comp2247421_c0_seq10	745.963	1.63011	0.285875	5.70218	1.18284e-08	5.29068e-07
comp2269738_c0_seq1	4966.01	-1.87341	0.328546	-5.70214	1.18312e-08	5.29068e-07
comp2277947_c0_seq1	1216.85	-1.90726	0.334544	-5.70105	1.1907e-08	5.31827e-07
comp2276819_c0_seq1	154.595	1.44643	0.253774	5.69968	1.20032e-08	5.35488e-07
comp2259975_c0_seq2	360.037	-2.30791	0.404966	-5.69901	1.20502e-08	5.36952e-07
comp2274951_c0_seq5	164.522	1.97312	0.346343	5.69702	1.21922e-08	5.42639e-07
comp2275557_c0_seq2	85.1679	-3.03789	0.533619	-5.693	1.24825e-08	5.54905e-07
comp2249511_c0_seq1	26.6314	-2.12783	0.373874	-5.69131	1.26072e-08	5.59789e-07
comp2278201_c1_seq1	476.508	-2.33993	0.411379	-5.68801	1.28528e-08	5.70025e-07
comp2264138_c0_seq2	383.683	1.59328	0.280173	5.68679	1.29452e-08	5.73449e-07
comp2248445_c0_seq1	69.8287	1.77894	0.312885	5.68558	1.30368e-08	5.76827e-07
comp2224794_c0_seq1	36.9826	-2.12745	0.374233	-5.68482	1.30953e-08	5.78738e-07
comp2248527_c0_seq2	3161.67	-2.09049	0.367755	-5.68446	1.31227e-08	5.79269e-07
comp2277538_c0_seq1	65.0784	2.19328	0.38595	5.68281	1.325e-08	5.84206e-07
comp2243143_c0_seq1	37.1117	-1.66385	0.29286	-5.68137	1.33619e-08	5.88456e-07
comp2267060_c0_seq1	256.715	2.24814	0.395743	5.68079	1.34072e-08	5.89758e-07
comp2206896_c0_seq1	12.2011	-3.41964	0.60232	-5.67745	1.36715e-08	6.00687e-07
comp2276040_c1_seq5	4579.33	-1.67302	0.294772	-5.67566	1.38151e-08	6.06291e-07
comp2253152_c0_seq1	1708.47	1.81517	0.319841	5.67522	1.38512e-08	6.07168e-07
comp2261530_c0_seq2	77.4657	-1.79633	0.316564	-5.67445	1.39133e-08	6.09185e-07
comp2277105_c0_seq7	656.733	-2.11133	0.372254	-5.67173	1.41363e-08	6.18228e-07
comp2269790_c0_seq1	298.826	1.62277	0.286138	5.67129	1.41722e-08	6.18907e-07
comp2274969_c0_seq7	578.65	-1.49307	0.263276	-5.67115	1.41846e-08	6.18907e-07
comp2253766_c0_seq10	200.488	-2.47912	0.437351	-5.66849	1.44063e-08	6.27854e-07
comp2277723_c2_seq1	416.087	2.49441	0.440304	5.66519	1.46858e-08	6.39296e-07
comp2268065_c0_seq1	79.2451	-2.39772	0.423311	-5.6642	1.47713e-08	6.42277e-07
comp2240131_c0_seq3	83.5292	-2.07917	0.367096	-5.66382	1.4804e-08	6.42502e-07
comp2279764_c0_seq1	2282.62	1.41082	0.249097	5.66374	1.48105e-08	6.42502e-07
comp2270921_c0_seq6	165.517	-2.8385	0.501218	-5.6632	1.48576e-08	6.43791e-07
comp2278340_c0_seq7	130.466	2.32849	0.411176	5.66301	1.48743e-08	6.43791e-07
comp2268776_c0_seq3	447.934	1.64018	0.289656	5.66252	1.49165e-08	6.44879e-07
comp2274611_c0_seq1	184.146	-2.47745	0.437889	-5.6577	1.53415e-08	6.62492e-07
comp2271189_c0_seq4	97.5788	-2.34489	0.414778	-5.65335	1.57351e-08	6.78712e-07
comp2253699_c0_seq2	235.921	-1.66669	0.295037	-5.64908	1.61307e-08	6.94981e-07
comp2268156_c1_seq2	58.4748	-2.77988	0.492305	-5.64667	1.63589e-08	7.04009e-07
comp2267788_c0_seq5	2755.99	-1.70877	0.302712	-5.64487	1.65303e-08	7.10577e-07
comp2266336_c1_seq2	181.011	-2.173	0.385093	-5.64278	1.67324e-08	7.18445e-07
comp2276626_c0_seq1	389.212	-2.08795	0.370037	-5.64254	1.6756e-08	7.18642e-07
comp2271649_c0_seq1	1577.45	2.83875	0.503451	5.63858	1.7146e-08	7.34535e-07
comp2271307_c0_seq1	19967.9	-2.44641	0.433892	-5.6383	1.71738e-08	7.34889e-07
comp2269365_c0_seq1	3443.63	-1.57194	0.278826	-5.63772	1.72317e-08	7.36532e-07
comp2274562_c0_seq1	662.298	1.52409	0.270444	5.63553	1.74525e-08	7.45127e-07
comp2267689_c0_seq6	63.4833	2.1066	0.373863	5.63469	1.75377e-08	7.47919e-07
comp2273607_c0_seq2	65.3328	2.58263	0.458402	5.63399	1.76087e-08	7.501e-07
comp2269260_c0_seq1	46.7886	-2.30974	0.410264	-5.62989	1.80327e-08	7.67295e-07
comp2272961_c0_seq1	299.576	-1.75023	0.310904	-5.62948	1.80752e-08	7.68236e-07
comp2269333_c0_seq9	251.833	1.8437	0.327602	5.62786	1.82455e-08	7.74603e-07
comp2277563_c0_seq3	1041.57	0.979379	0.174116	5.62488	1.8564e-08	7.87239e-07
comp2274991_c2_seq19	518.94	1.79901	0.319923	5.62324	1.87407e-08	7.93839e-07
comp2267864_c0_seq3	36.0512	2.88046	0.512557	5.61978	1.91196e-08	8.08984e-07
comp2261446_c0_seq1	101.959	1.78948	0.318513	5.61824	1.92911e-08	8.15325e-07
comp2263096_c0_seq1	1140.02	-1.70008	0.303138	-5.60826	2.04365e-08	8.62769e-07
comp1943186_c0_seq1	150.559	2.32875	0.415373	5.6064	2.06577e-08	8.71133e-07
comp2252587_c0_seq2	13.8091	-2.60769	0.465167	-5.60593	2.07144e-08	8.72547e-07
comp2278288_c0_seq4	260.167	-2.86596	0.511448	-5.60362	2.09922e-08	8.83263e-07
comp2220544_c0_seq1	53.369	-2.32414	0.414772	-5.60342	2.10166e-08	8.83308e-07
comp2263643_c1_seq3	28.5311	-2.31745	0.413874	-5.5994	2.15092e-08	9.03002e-07
comp2240424_c0_seq2	36.0952	-2.24849	0.401772	-5.59645	2.1879e-08	9.16857e-07
comp2279244_c0_seq1	2073.81	1.40689	0.251394	5.59638	2.18878e-08	9.16857e-07
comp2266442_c0_seq5	92.0785	2.60295	0.465211	5.5952	2.20367e-08	9.22071e-07
comp2269116_c0_seq1	632.323	-1.88954	0.337746	-5.59454	2.21206e-08	9.24556e-07
comp2240069_c0_seq1	679.849	-2.12684	0.380239	-5.59344	2.2262e-08	9.28411e-07
comp2273614_c0_seq1	44.0896	-2.92637	0.523164	-5.5936	2.22404e-08	9.28411e-07
comp2258290_c0_seq1	332.301	2.77182	0.495763	5.59102	2.25741e-08	9.40389e-07
comp2273721_c0_seq12	213.083	1.78609	0.319522	5.58988	2.2723e-08	9.45547e-07
comp2259397_c0_seq12	23.8119	-2.4365	0.436016	-5.58809	2.29575e-08	9.54252e-07
comp2270078_c0_seq1	445.194	-1.11804	0.20009	-5.58771	2.30089e-08	9.55337e-07
comp2269850_c0_seq1	1798.66	2.5442	0.455456	5.58605	2.32293e-08	9.63428e-07
comp2227117_c0_seq2	1085.42	1.06217	0.190169	5.58542	2.33138e-08	9.65873e-07
comp2232518_c0_seq1	311.805	-2.40322	0.430331	-5.58459	2.34252e-08	9.69423e-07
comp2263356_c0_seq1	230.889	-2.98003	0.533677	-5.58396	2.35105e-08	9.71887e-07
comp2271225_c0_seq5	44988.3	2.40778	0.431274	5.58295	2.36478e-08	9.76493e-07
comp2223620_c0_seq1	62.8852	-3.07124	0.55026	-5.58144	2.38534e-08	9.83908e-07
comp2270901_c0_seq1	43.9221	2.8763	0.51537	5.58104	2.39082e-08	9.85089e-07
comp2248802_c1_seq2	145.158	-1.74454	0.312818	-5.57685	2.44914e-08	1.00802e-06
comp2259525_c0_seq2	225.815	1.93802	0.348192	5.56597	2.60695e-08	1.0718e-06
comp2265878_c0_seq2	257.952	2.33392	0.419771	5.55998	2.69798e-08	1.10645e-06
comp2272472_c0_seq5	258.045	-1.69761	0.305313	-5.56023	2.69419e-08	1.10645e-06
comp2276970_c1_seq7	839.307	1.47654	0.265572	5.55985	2.70001e-08	1.10645e-06
comp1975390_c0_seq1	237.194	2.28717	0.411422	5.55918	2.71048e-08	1.10953e-06
comp2252205_c0_seq1	340.307	-2.25465	0.405685	-5.55763	2.73461e-08	1.1182e-06
comp2257382_c0_seq3	22975.8	2.96049	0.532928	5.55514	2.77395e-08	1.13306e-06
comp2270488_c0_seq1	103.931	-1.30223	0.234527	-5.55258	2.81485e-08	1.14852e-06
comp2261996_c0_seq2	457.853	2.58598	0.465744	5.55237	2.81824e-08	1.14866e-06
comp2262305_c0_seq1	4994.17	1.46813	0.264489	5.55081	2.84353e-08	1.15647e-06
comp2263896_c0_seq3	1024.01	-2.01233	0.362522	-5.55091	2.84187e-08	1.15647e-06
comp2257683_c0_seq2	70.2227	-2.4972	0.450022	-5.54906	2.87218e-08	1.16686e-06
comp2235151_c0_seq1	43.9124	2.54381	0.458488	5.54825	2.88536e-08	1.17096e-06
comp2139868_c0_seq1	186.622	1.21123	0.218327	5.54776	2.8935e-08	1.17174e-06
comp2254374_c1_seq4	204.483	-2.5563	0.460779	-5.54778	2.89312e-08	1.17174e-06
comp2272124_c0_seq1	2487.49	2.0902	0.376829	5.54681	2.90922e-08	1.17685e-06
comp2225718_c0_seq1	40.8574	2.76123	0.498158	5.54288	2.97535e-08	1.20231e-06
gnl|Pdu_trscr_assembly_1|90137	228.48	1.38416	0.249748	5.54221	2.98684e-08	1.20566e-06
comp2277808_c1_seq1	136.943	2.36658	0.427072	5.54142	3.00025e-08	1.20978e-06
comp2275941_c0_seq9	2890.31	-1.59134	0.287205	-5.54079	3.01117e-08	1.21289e-06
comp2275131_c0_seq6	516.188	-1.8284	0.330119	-5.53861	3.04881e-08	1.22674e-06
comp1326591_c0_seq1	48.9946	2.58859	0.467421	5.53803	3.05899e-08	1.22952e-06
comp2272523_c0_seq2	193.751	1.48186	0.267623	5.53714	3.07457e-08	1.23447e-06
comp2154653_c0_seq1	11.1911	-2.95659	0.534095	-5.5357	3.09994e-08	1.24202e-06
comp2263282_c0_seq2	247.268	-2.44601	0.441861	-5.5357	3.09985e-08	1.24202e-06
comp2256287_c0_seq1	436.409	-2.54489	0.459876	-5.53387	3.1324e-08	1.25369e-06
comp2273940_c0_seq7	145.164	-1.91351	0.34582	-5.53327	3.1432e-08	1.25535e-06
comp2277331_c0_seq3	980.362	-2.10658	0.380707	-5.53334	3.14192e-08	1.25535e-06
comp2273432_c0_seq4	139.395	-2.43759	0.440639	-5.53193	3.16724e-08	1.26362e-06
comp2272098_c1_seq1	43.2394	3.0919	0.559078	5.53035	3.19586e-08	1.27369e-06
comp2251338_c0_seq8	151.069	2.10447	0.380566	5.52985	3.20497e-08	1.27597e-06
comp2278511_c0_seq9	4151.58	-1.96502	0.35543	-5.52856	3.22866e-08	1.28405e-06
comp2271554_c0_seq2	116.334	-2.53351	0.458698	-5.52326	3.32764e-08	1.32202e-06
comp2270447_c0_seq2	36.2673	-3.45782	0.626272	-5.52127	3.36562e-08	1.3357e-06
comp2267763_c1_seq7	368.742	1.98261	0.359657	5.51251	3.53752e-08	1.40245e-06
comp2270326_c0_seq1	2552.93	-1.59402	0.289204	-5.51174	3.55302e-08	1.40712e-06
comp2258854_c0_seq2	69.262	2.12239	0.385375	5.50733	3.64313e-08	1.44129e-06
comp2275983_c0_seq1	1805.46	-2.29138	0.416117	-5.50658	3.65874e-08	1.44595e-06
comp2267481_c0_seq3	61.809	-1.69652	0.308137	-5.50572	3.67655e-08	1.45147e-06
comp2244623_c0_seq1	75.1795	2.21269	0.402165	5.50195	3.75605e-08	1.47976e-06
comp2257477_c0_seq1	118.47	1.37202	0.249365	5.50205	3.7541e-08	1.47976e-06
comp2265599_c0_seq1	237.497	-2.34654	0.426706	-5.49919	3.81547e-08	1.5016e-06
comp2277878_c2_seq6	462.676	1.26029	0.229312	5.49595	3.88613e-08	1.52781e-06
comp2245338_c0_seq1	23.9012	2.86949	0.522303	5.49391	3.93128e-08	1.54396e-06
comp2268977_c0_seq1	606.118	-1.35204	0.246325	-5.48886	4.04542e-08	1.58713e-06
comp1194397_c0_seq1	313.102	-1.31535	0.239659	-5.48843	4.05528e-08	1.5877e-06
comp2245998_c0_seq3	76.4283	2.18145	0.397455	5.48854	4.05273e-08	1.5877e-06
comp2276298_c0_seq2	245.425	1.45032	0.264325	5.48687	4.09117e-08	1.60009e-06
comp2253859_c0_seq1	86.0142	1.90483	0.347203	5.48621	4.10641e-08	1.60439e-06
comp1971890_c0_seq1	69.8321	2.38351	0.4347	5.48312	4.17886e-08	1.63101e-06
comp2273792_c0_seq1	414.164	-2.4917	0.45463	-5.48073	4.23573e-08	1.6515e-06
comp2234664_c1_seq2	394.562	1.49744	0.273272	5.47968	4.26095e-08	1.65791e-06
comp2235819_c0_seq2	1170.82	-1.41813	0.258795	-5.47974	4.25954e-08	1.65791e-06
comp2269659_c0_seq1	374.088	-1.93361	0.353028	-5.47721	4.32084e-08	1.67948e-06
comp2264838_c0_seq3	5643.64	0.983604	0.179661	5.47479	4.38041e-08	1.70088e-06
comp2273966_c0_seq7	298.336	1.34945	0.246502	5.47441	4.38971e-08	1.70274e-06
comp2256930_c1_seq1	72.6428	2.05392	0.375395	5.47137	4.46582e-08	1.73048e-06
comp2239331_c0_seq1	188.658	-1.41337	0.258375	-5.47024	4.49425e-08	1.73971e-06
comp2256174_c0_seq1	55.4841	-2.43829	0.445807	-5.46938	4.51612e-08	1.74639e-06
comp2105772_c0_seq1	301.79	-2.2478	0.411008	-5.469	4.52592e-08	1.74674e-06
comp2249043_c0_seq1	72.7076	-1.92342	0.351697	-5.46898	4.52629e-08	1.74674e-06
comp2254382_c0_seq1	55.9297	2.53461	0.463755	5.46542	4.61824e-08	1.7804e-06
comp2256950_c0_seq1	27.8948	2.89492	0.529859	5.46356	4.66687e-08	1.79732e-06
comp2246432_c0_seq1	380.462	2.53226	0.463612	5.46202	4.70735e-08	1.81106e-06
comp2253849_c0_seq1	6.64764	-3.48407	0.637938	-5.46146	4.72236e-08	1.81498e-06
comp2274183_c1_seq8	1084.29	-1.07128	0.196245	-5.4589	4.79098e-08	1.83948e-06
comp2277034_c0_seq10	417.61	-1.89844	0.347795	-5.45849	4.80201e-08	1.84184e-06
comp2261982_c0_seq2	144.512	1.85331	0.33962	5.45701	4.8422e-08	1.85537e-06
comp2261512_c0_seq2	952.963	-2.04448	0.37516	-5.44963	5.04758e-08	1.93211e-06
comp2276721_c0_seq4	131.725	2.28132	0.41868	5.44883	5.07028e-08	1.93883e-06
comp2276597_c0_seq2	1496.82	-1.45257	0.266621	-5.44809	5.09134e-08	1.94491e-06
comp2273204_c0_seq26	8710.03	0.97587	0.179163	5.44683	5.12759e-08	1.95678e-06
comp2261571_c0_seq1	100.939	-2.2344	0.410391	-5.44457	5.19295e-08	1.97972e-06
comp2277107_c1_seq1	4387.44	-1.15338	0.211917	-5.44262	5.25023e-08	1.99954e-06
comp2234777_c0_seq2	36.3632	-3.26799	0.600617	-5.44106	5.29659e-08	2.01516e-06
comp2258014_c0_seq1	3290.52	1.38331	0.254257	5.44061	5.3099e-08	2.01819e-06
comp1934156_c0_seq1	91.7945	1.59779	0.293719	5.43986	5.33225e-08	2.02464e-06
comp2277927_c4_seq1	214.24	2.24973	0.413755	5.43734	5.4083e-08	2.05146e-06
comp2264063_c0_seq1	490.436	1.41119	0.259596	5.43608	5.44658e-08	2.0639e-06
comp2276609_c0_seq2	611.51	1.39514	0.256663	5.4357	5.45813e-08	2.06621e-06
comp2265773_c0_seq2	203.365	-1.80031	0.331265	-5.43465	5.49045e-08	2.07636e-06
comp2264500_c0_seq3	537.414	-1.47797	0.271976	-5.4342	5.50417e-08	2.07946e-06
comp2274822_c1_seq1	1595.91	-1.95552	0.359879	-5.43383	5.51577e-08	2.08041e-06
comp2277160_c2_seq1	775.587	-2.04142	0.375691	-5.43377	5.51769e-08	2.08041e-06
comp2266806_c0_seq8	352.437	2.61396	0.481117	5.4331	5.53825e-08	2.08607e-06
comp2269547_c0_seq1	963.524	-1.5333	0.282237	-5.43267	5.55163e-08	2.08903e-06
comp2250470_c0_seq1	19566.5	1.64525	0.302866	5.43226	5.56453e-08	2.0918e-06
comp2213012_c1_seq1	24.4462	-3.29146	0.606014	-5.43132	5.59382e-08	2.10072e-06
gnl|Pdu_trscr_assembly_1|15716	41.8497	2.29332	0.422397	5.4293	5.6575e-08	2.12252e-06
comp2277231_c0_seq2	77.7291	-2.02619	0.373339	-5.42721	5.72425e-08	2.14543e-06
comp2263903_c0_seq1	104.689	-2.18164	0.40204	-5.42642	5.74947e-08	2.15274e-06
comp2277062_c0_seq6	211.177	-2.15135	0.396477	-5.42617	5.75753e-08	2.15363e-06
comp2260132_c0_seq1	29.5802	2.60733	0.480579	5.42539	5.78268e-08	2.16089e-06
comp2275101_c0_seq4	740.792	-2.1849	0.402897	-5.42298	5.86132e-08	2.18811e-06
comp2261769_c0_seq3	196.692	-1.48174	0.273275	-5.42214	5.88891e-08	2.19624e-06
comp2271574_c0_seq2	119.466	-2.02662	0.373794	-5.42174	5.90218e-08	2.19901e-06
comp2265541_c0_seq1	45.2744	-2.68064	0.494491	-5.42101	5.92627e-08	2.20581e-06
comp2216905_c0_seq1	93.4527	1.71492	0.316565	5.41728	6.05111e-08	2.25006e-06
comp2271959_c0_seq4	832.909	-1.94753	0.359785	-5.41305	6.19589e-08	2.30163e-06
comp2254515_c0_seq1	148.879	-2.79946	0.517315	-5.41152	6.24934e-08	2.3192e-06
comp2266847_c0_seq1	1517.21	2.5546	0.472204	5.40995	6.3044e-08	2.33734e-06
comp2270994_c0_seq16	2393.27	-1.7513	0.323731	-5.40975	6.31125e-08	2.33758e-06
comp2278922_c0_seq1	152.212	-1.84793	0.341673	-5.40849	6.35592e-08	2.35182e-06
comp2275664_c0_seq4	900.784	-1.53535	0.283946	-5.40718	6.40232e-08	2.36666e-06
comp2244052_c0_seq1	8.65323	-3.50264	0.647839	-5.40665	6.42135e-08	2.37137e-06
comp2267288_c1_seq6	62.0791	-2.34306	0.433394	-5.40631	6.43368e-08	2.37361e-06
comp2264496_c0_seq2	11.5973	-2.68646	0.497384	-5.40118	6.62026e-08	2.44006e-06
comp2256252_c0_seq1	19741.4	1.34403	0.248895	5.39998	6.66498e-08	2.45414e-06
comp2274336_c0_seq18	54.7311	-2.2292	0.413073	-5.39663	6.79058e-08	2.49796e-06
comp2277298_c0_seq4	1413.55	-1.94105	0.359699	-5.39632	6.80234e-08	2.49984e-06
comp2253516_c0_seq4	99348.7	1.75029	0.3244	5.39547	6.8345e-08	2.50922e-06
gnl|Pdu_trscr_assembly_1|10967	156.311	-1.80664	0.33487	-5.39505	6.85062e-08	2.51269e-06
comp2277301_c0_seq8	860.864	-1.42344	0.263888	-5.39409	6.88729e-08	2.52369e-06
comp2246807_c0_seq1	29.8251	-2.29488	0.42554	-5.39288	6.9337e-08	2.53823e-06
comp2270588_c0_seq2	1555.52	-1.46654	0.271955	-5.39257	6.94558e-08	2.54012e-06
comp2260998_c0_seq3	74.1752	-2.35667	0.437082	-5.39184	6.97402e-08	2.54805e-06
comp2258034_c0_seq4	123.405	-2.7883	0.51718	-5.39136	6.99283e-08	2.55245e-06
comp2271369_c0_seq1	11419.3	1.24235	0.230454	5.39088	7.01137e-08	2.55674e-06
comp2251051_c0_seq1	51.361	2.02446	0.375559	5.39054	7.02456e-08	2.55908e-06
comp2254345_c0_seq1	733.204	-1.91437	0.355159	-5.39019	7.03844e-08	2.56166e-06
comp2258543_c0_seq1	1010	-1.82646	0.338896	-5.38945	7.06726e-08	2.56968e-06
comp2250374_c0_seq1	26.2496	-2.53929	0.471422	-5.38644	7.18662e-08	2.61056e-06
comp2253656_c0_seq3	842.372	1.98592	0.368751	5.38554	7.22264e-08	2.62112e-06
comp2254630_c0_seq2	4700.01	-2.34976	0.43644	-5.38393	7.2876e-08	2.64216e-06
comp2267858_c0_seq2	821.787	-2.34254	0.435125	-5.38361	7.3006e-08	2.64433e-06
comp2267412_c0_seq1	59.3996	2.50362	0.465554	5.37771	7.54388e-08	2.72983e-06
comp2200430_c0_seq3	294.686	1.5681	0.291716	5.37543	7.64021e-08	2.76204e-06
comp2262051_c0_seq1	109.662	2.65486	0.494039	5.3738	7.70963e-08	2.78181e-06
comp2264599_c0_seq1	480.46	-1.61643	0.30079	-5.37396	7.70259e-08	2.78181e-06
comp2276389_c0_seq2	954.946	1.45262	0.270369	5.37272	7.75575e-08	2.79577e-06
comp2241507_c0_seq1	236.541	2.81831	0.525021	5.36798	7.96213e-08	2.8647e-06
comp2277462_c0_seq1	115.415	2.13334	0.397411	5.36809	7.95744e-08	2.8647e-06
comp2250208_c0_seq1	83.8367	2.73375	0.509453	5.36605	8.04779e-08	2.89276e-06
comp1425511_c0_seq1	97.226	-1.76519	0.328997	-5.36537	8.07833e-08	2.90097e-06
comp2279736_c0_seq1	1358.79	1.64634	0.30686	5.36514	8.08868e-08	2.90193e-06
comp2234453_c0_seq2	486.789	2.61944	0.488594	5.36118	8.26822e-08	2.96353e-06
comp2267916_c0_seq1	142.967	-1.77861	0.331925	-5.35846	8.39337e-08	3.00553e-06
comp2260101_c0_seq2	160.075	2.21793	0.413945	5.35802	8.41369e-08	3.00995e-06
comp2274067_c2_seq2	297.721	-2.50456	0.46748	-5.35757	8.4348e-08	3.01464e-06
comp2140166_c0_seq1	2067.49	-1.28957	0.240737	-5.35674	8.47358e-08	3.02564e-06
comp1975994_c0_seq1	945.005	-1.78153	0.332821	-5.35283	8.65874e-08	3.08591e-06
gnl|Pdu_trscr_assembly_1|5114	156.897	1.91501	0.35775	5.35293	8.65421e-08	3.08591e-06
comp2274238_c3_seq9	8859.4	-0.948162	0.177146	-5.35242	8.67848e-08	3.09003e-06
gnl|Pdu_trscr_assembly_1|7327	1073.17	1.15663	0.2162	5.34982	8.80435e-08	3.13189e-06
comp2265639_c0_seq3	58.1247	2.1372	0.399629	5.34797	8.8945e-08	3.16098e-06
comp2245323_c1_seq1	231.158	-2.26359	0.423596	-5.34375	9.10439e-08	3.23253e-06
comp2142739_c0_seq1	151.465	-2.01524	0.377177	-5.34296	9.14409e-08	3.24357e-06
comp2217620_c0_seq2	82.3502	-3.12893	0.585678	-5.3424	9.17264e-08	3.25065e-06
comp2260877_c0_seq1	24.7061	-3.00142	0.561832	-5.3422	9.18239e-08	3.25105e-06
comp2277665_c0_seq3	1563.44	-1.71289	0.320697	-5.34115	9.23603e-08	3.26698e-06
comp2229746_c0_seq2	186.973	1.5377	0.287974	5.33971	9.30942e-08	3.28985e-06
comp2240696_c0_seq1	56.0567	2.10651	0.394641	5.33779	9.40882e-08	3.32187e-06
comp2264779_c0_seq1	770.401	-1.61976	0.303551	-5.33604	9.49999e-08	3.35092e-06
comp2276176_c0_seq4	1541.92	-2.57835	0.483272	-5.33519	9.5446e-08	3.36351e-06
comp2254976_c0_seq2	54.9225	-2.92394	0.548446	-5.33131	9.75045e-08	3.43285e-06
comp2273112_c0_seq5	66.5344	2.26346	0.424591	5.33092	9.77161e-08	3.43709e-06
comp2240833_c0_seq1	52.1661	2.30643	0.432871	5.32823	9.91751e-08	3.48382e-06
comp2275229_c0_seq16	1091.05	2.26793	0.425652	5.32813	9.9229e-08	3.48382e-06
comp2268817_c3_seq1	105.451	-1.83924	0.345253	-5.32722	9.97296e-08	3.49814e-06
comp2246999_c0_seq1	1691.03	-1.52811	0.286957	-5.32523	1.00826e-07	3.5333e-06
comp2266867_c0_seq2	237.453	1.39884	0.262776	5.32332	1.01891e-07	3.56732e-06
comp2237339_c0_seq1	17.152	-2.41027	0.453021	-5.32044	1.03515e-07	3.62083e-06
comp2142794_c0_seq1	1241.73	2.30031	0.432409	5.31976	1.03907e-07	3.63116e-06
gnl|Pdu_trscr_assembly_1|8306	312.829	1.30867	0.246032	5.31911	1.04279e-07	3.64079e-06
comp2276278_c0_seq2	500.765	1.14356	0.215009	5.31867	1.04531e-07	3.64623e-06
comp2259227_c0_seq1	5723.37	1.81461	0.341423	5.31484	1.06749e-07	3.72016e-06
comp2272047_c0_seq1	172.682	1.84084	0.346383	5.31444	1.06983e-07	3.72486e-06
comp2276328_c1_seq7	468.926	1.08046	0.203375	5.31264	1.0805e-07	3.75856e-06
comp2266660_c0_seq2	29.5612	-2.85601	0.537815	-5.3104	1.09383e-07	3.8014e-06
comp2246451_c0_seq1	26.794	2.87234	0.541305	5.30632	1.11863e-07	3.88401e-06
comp2278063_c0_seq2	865.765	-1.10894	0.20903	-5.30515	1.12579e-07	3.90528e-06
comp1281272_c0_seq1	834.389	2.22354	0.419197	5.30428	1.13118e-07	3.91419e-06
comp2269271_c0_seq4	343.292	-1.77414	0.334458	-5.30452	1.12971e-07	3.91419e-06
comp2275636_c0_seq4	193.467	2.45064	0.462017	5.30423	1.13147e-07	3.91419e-06
comp2266728_c0_seq2	86.1867	-1.45073	0.273519	-5.30396	1.13316e-07	3.91645e-06
comp2278343_c2_seq2	768.55	-1.77476	0.33463	-5.30365	1.13511e-07	3.91961e-06
comp2252365_c0_seq1	55.0803	-2.84303	0.536085	-5.30332	1.13718e-07	3.92317e-06
comp2258671_c0_seq2	171.111	-2.40285	0.453172	-5.30229	1.14357e-07	3.94162e-06
comp2237006_c0_seq2	70.8316	3.17211	0.598513	5.29998	1.15816e-07	3.98825e-06
comp2251922_c0_seq3	32.535	2.69782	0.509325	5.29686	1.1781e-07	4.05039e-06
comp2272742_c0_seq4	808.166	2.35539	0.44468	5.29682	1.17835e-07	4.05039e-06
comp2265615_c0_seq3	371.934	-2.83435	0.535207	-5.2958	1.18498e-07	4.06948e-06
comp2272111_c1_seq16	755.978	-1.74794	0.330192	-5.2937	1.19864e-07	4.11264e-06
comp2142030_c0_seq1	332.203	-1.41583	0.267622	-5.29043	1.2203e-07	4.18316e-06
comp2256160_c0_seq1	51.314	-2.19114	0.41426	-5.2893	1.22789e-07	4.20534e-06
comp2257264_c1_seq1	544.527	2.04825	0.387436	5.28667	1.24562e-07	4.2622e-06
comp2278488_c0_seq1	479.371	2.20161	0.416511	5.28584	1.25129e-07	4.27773e-06
comp2261892_c0_seq2	116.056	2.49298	0.471661	5.28554	1.25337e-07	4.28098e-06
comp2273387_c0_seq1	205.471	2.40607	0.455301	5.28457	1.26001e-07	4.29977e-06
comp2277998_c0_seq6	235.251	-1.37877	0.261005	-5.28254	1.27403e-07	4.34366e-06
comp2267814_c0_seq7	532.252	-1.77345	0.335769	-5.28175	1.27955e-07	4.35857e-06
comp2275642_c0_seq13	445.662	-1.64979	0.312389	-5.28119	1.28346e-07	4.36794e-06
comp2264479_c0_seq6	83.7175	-2.02111	0.382737	-5.28066	1.28717e-07	4.3766e-06
comp2272168_c0_seq4	725.378	1.74403	0.330379	5.27887	1.29984e-07	4.41571e-06
comp2277857_c0_seq7	557.598	-1.32908	0.251817	-5.27796	1.30631e-07	4.43371e-06
comp2274272_c0_seq1	242.839	-2.38752	0.452531	-5.27593	1.32088e-07	4.47912e-06
gnl|Pdu_trscr_assembly_1|20826	114.998	2.05087	0.388745	5.27561	1.32313e-07	4.48274e-06
comp2237345_c0_seq1	100.538	1.96889	0.373298	5.27432	1.33251e-07	4.51044e-06
comp2257509_c0_seq1	96.1136	1.77853	0.337338	5.27226	1.34752e-07	4.55716e-06
comp2269277_c0_seq3	5336.37	2.16318	0.410317	5.27197	1.34967e-07	4.56036e-06
gnl|Pdu_trscr_assembly_1|12794	12373.2	1.30384	0.247376	5.27068	1.35917e-07	4.58835e-06
comp2261591_c0_seq1	78.8983	-2.42541	0.460317	-5.269	1.37169e-07	4.62649e-06
comp2262410_c0_seq1	285.402	1.82303	0.346085	5.26758	1.38236e-07	4.65831e-06
comp2260417_c1_seq1	12.6496	2.9043	0.551601	5.26523	1.40017e-07	4.71411e-06
gnl|Pdu_trscr_assembly_1|200732	11378.9	2.33474	0.443447	5.26499	1.40197e-07	4.71596e-06
comp2251408_c0_seq1	129.651	1.36412	0.259216	5.26247	1.42131e-07	4.77678e-06
comp2277360_c0_seq2	858.983	1.25472	0.238458	5.2618	1.4265e-07	4.78994e-06
comp1897429_c0_seq1	569.465	-1.47404	0.280462	-5.25576	1.47416e-07	4.94557e-06
comp1879972_c0_seq1	163.483	-2.10292	0.400227	-5.25432	1.48573e-07	4.97996e-06
comp2277104_c0_seq3	2529.52	1.77201	0.337357	5.25262	1.49951e-07	5.02169e-06
comp2268679_c0_seq1	91.6071	-1.23618	0.235357	-5.25236	1.50161e-07	5.02427e-06
comp1200167_c0_seq1	455.888	1.62975	0.310302	5.25213	1.50352e-07	5.02619e-06
comp2265029_c1_seq4	2318.19	-1.21596	0.231596	-5.25034	1.51819e-07	5.07074e-06
comp2277331_c1_seq5	1314.48	-1.61438	0.307501	-5.25001	1.52091e-07	5.07534e-06
comp2265538_c0_seq7	29.5547	2.47794	0.472149	5.24822	1.53576e-07	5.12039e-06
comp2271273_c0_seq2	178.572	1.9122	0.364367	5.248	1.53763e-07	5.12208e-06
gnl|Pdu_trscr_assembly_1|22197	258.966	1.50953	0.287767	5.24568	1.55709e-07	5.18235e-06
comp2259496_c0_seq1	55.6375	2.15171	0.41035	5.24361	1.57468e-07	5.23627e-06
comp2265967_c0_seq1	102.855	2.19566	0.418998	5.24027	1.60339e-07	5.32703e-06
comp2271921_c1_seq4	68.9165	-2.78943	0.532943	-5.23401	1.65873e-07	5.50604e-06
comp2259627_c0_seq1	535.006	-1.48486	0.283754	-5.23292	1.66854e-07	5.53375e-06
comp2276780_c0_seq2	801.787	0.996881	0.190519	5.23246	1.67273e-07	5.54277e-06
comp2239961_c0_seq1	198.61	1.52637	0.291754	5.2317	1.67962e-07	5.56071e-06
comp2193984_c0_seq1	29.6236	-2.55282	0.488151	-5.22956	1.69911e-07	5.62032e-06
comp2276908_c0_seq5	3055.82	-1.60803	0.307561	-5.22832	1.71056e-07	5.65323e-06
comp2142514_c0_seq2	83.2469	2.30905	0.441735	5.22723	1.7207e-07	5.68176e-06
comp2254294_c0_seq1	198.69	-2.27089	0.434495	-5.22649	1.72755e-07	5.69332e-06
comp2266631_c0_seq1	816.498	-1.7274	0.330526	-5.22621	1.73023e-07	5.69332e-06
comp2271994_c0_seq2	185060	1.80014	0.344433	5.22637	1.72867e-07	5.69332e-06
comp2272502_c0_seq1	1794.76	-2.16468	0.414188	-5.22632	1.72918e-07	5.69332e-06
comp2205034_c0_seq1	123.853	2.88021	0.551207	5.22528	1.7389e-07	5.71379e-06
comp2263543_c0_seq5	215.435	-2.24294	0.429253	-5.22522	1.73948e-07	5.71379e-06
comp2264734_c0_seq1	93.211	1.737	0.33253	5.22358	1.755e-07	5.75977e-06
comp2260663_c0_seq1	385.9	-2.45258	0.469595	-5.22276	1.76277e-07	5.78022e-06
comp2277818_c0_seq4	990.185	-2.03786	0.39028	-5.22154	1.7744e-07	5.81333e-06
comp2271886_c0_seq1	38.2235	2.47121	0.473346	5.22073	1.78218e-07	5.83374e-06
comp2271231_c0_seq3	966.516	-2.06089	0.394912	-5.21861	1.80268e-07	5.89063e-06
comp2272497_c1_seq1	99.6176	2.63325	0.504578	5.21871	1.8017e-07	5.89063e-06
comp2271818_c0_seq1	343.656	-2.26878	0.434913	-5.21663	1.82207e-07	5.94883e-06
comp2269326_c0_seq2	1972.66	0.970068	0.185979	5.21602	1.82808e-07	5.96329e-06
comp2138556_c0_seq1	13.8788	-3.09013	0.592564	-5.21485	1.83968e-07	5.99596e-06
comp2266705_c0_seq2	56.257	-2.47026	0.473864	-5.21301	1.85803e-07	6.05055e-06
comp2234451_c0_seq4	108.089	-3.04716	0.58468	-5.21167	1.87147e-07	6.08425e-06
comp2242282_c0_seq1	17331.3	1.3561	0.260205	5.21166	1.87161e-07	6.08425e-06
comp2263359_c0_seq1	87.4645	1.83905	0.352965	5.21029	1.88548e-07	6.12408e-06
comp2268498_c0_seq1	334.866	1.09176	0.209614	5.20841	1.90464e-07	6.18098e-06
comp2272087_c2_seq11	317.958	1.98453	0.381058	5.20794	1.90947e-07	6.19134e-06
comp2248442_c1_seq2	50.7312	-1.63037	0.313084	-5.20745	1.91449e-07	6.20229e-06
comp2140131_c0_seq1	203.619	-1.43981	0.276649	-5.20446	1.94564e-07	6.29781e-06
comp2237456_c0_seq1	91.9961	1.80632	0.347147	5.20332	1.95758e-07	6.331e-06
comp2251129_c0_seq1	168.71	-2.0564	0.395383	-5.20104	1.98179e-07	6.40384e-06
comp2260094_c0_seq3	6549.35	-1.55922	0.299905	-5.19904	2.0032e-07	6.46747e-06
comp2046374_c0_seq1	49.1993	-1.94102	0.373411	-5.19808	2.01354e-07	6.49529e-06
comp2278030_c0_seq10	3134.45	-1.38881	0.267435	-5.19307	2.06851e-07	6.66692e-06
comp2263951_c0_seq2	131.956	1.69317	0.326183	5.19086	2.09329e-07	6.74105e-06
comp2275057_c0_seq3	2386.95	-0.965672	0.186053	-5.1903	2.09961e-07	6.75561e-06
comp2270401_c0_seq2	1392	1.46132	0.281613	5.18912	2.11292e-07	6.79266e-06
comp2267522_c0_seq1	452.538	-1.81923	0.3507	-5.18744	2.13207e-07	6.84838e-06
comp2268778_c0_seq16	434.795	-1.13684	0.219162	-5.18718	2.13497e-07	6.85187e-06
comp2267248_c1_seq1	109.126	1.84782	0.356329	5.18571	2.15197e-07	6.90056e-06
comp2254653_c1_seq1	31.6375	-1.84307	0.355433	-5.18542	2.15532e-07	6.90544e-06
comp2271779_c0_seq1	37.0721	2.10925	0.407156	5.18045	2.21352e-07	7.08589e-06
comp2277394_c0_seq13	228.501	1.10678	0.213695	5.17926	2.22772e-07	7.12531e-06
comp2277739_c0_seq12	2054.29	-2.45564	0.47419	-5.1786	2.23556e-07	7.14434e-06
comp2276867_c0_seq11	814.833	-2.01394	0.388957	-5.17779	2.24525e-07	7.16922e-06
comp2273484_c0_seq3	458.453	1.42688	0.275718	5.17516	2.27721e-07	7.26511e-06
comp2260027_c0_seq1	247.16	-2.13516	0.412645	-5.17433	2.28725e-07	7.28483e-06
comp2265991_c0_seq1	496.802	-2.28095	0.440819	-5.17434	2.28719e-07	7.28483e-06
comp2264812_c0_seq2	16.5499	2.70359	0.522682	5.17253	2.30944e-07	7.34931e-06
comp2209542_c0_seq2	373.881	-2.14051	0.413862	-5.17205	2.31543e-07	7.36217e-06
comp2273438_c0_seq5	1128.22	-1.85586	0.35896	-5.1701	2.33971e-07	7.43312e-06
comp2258702_c0_seq6	25.4493	2.3566	0.456032	5.16762	2.37097e-07	7.52609e-06
comp2254208_c0_seq1	158.505	1.59023	0.307802	5.16641	2.38634e-07	7.56852e-06
comp2246367_c0_seq1	64.4333	1.78919	0.346344	5.16594	2.39236e-07	7.58123e-06
comp2243988_c0_seq1	199.12	1.80003	0.348609	5.16347	2.42415e-07	7.67552e-06
comp2267914_c1_seq2	688.365	-2.26812	0.439292	-5.16313	2.42854e-07	7.68299e-06
comp2276088_c1_seq1	80.8079	-2.14698	0.416041	-5.16051	2.46277e-07	7.78475e-06
comp2224092_c0_seq1	117.407	-1.83945	0.356562	-5.15885	2.48475e-07	7.84766e-06
comp2257292_c2_seq1	54.4933	2.14228	0.415386	5.15733	2.50495e-07	7.90485e-06
comp2250963_c0_seq1	10.4646	-2.4211	0.469787	-5.15362	2.55507e-07	8.05627e-06
comp2274598_c0_seq1	95.1626	1.57	0.304689	5.15279	2.56638e-07	8.08516e-06
comp1986706_c0_seq1	42.1678	2.28718	0.444053	5.15068	2.59546e-07	8.16996e-06
comp2240222_c0_seq1	32.0055	-3.36271	0.652947	-5.15005	2.60413e-07	8.19042e-06
comp2273758_c1_seq1	587.315	-2.64063	0.512885	-5.14857	2.62475e-07	8.24155e-06
comp2273892_c2_seq3	1003.61	-2.01329	0.391033	-5.14866	2.62354e-07	8.24155e-06
gnl|Pdu_trscr_assembly_1|86954	184.7	-1.70738	0.331657	-5.14804	2.63229e-07	8.25148e-06
comp2265580_c1_seq5	151.626	1.8581	0.360933	5.14806	2.63191e-07	8.25148e-06
gnl|Pdu_trscr_assembly_1|16825	1679.25	-1.13055	0.219647	-5.14713	2.64505e-07	8.28459e-06
comp2263059_c1_seq1	50.0482	-1.95383	0.379734	-5.14526	2.6715e-07	8.3605e-06
comp2267783_c2_seq1	691.499	-1.98468	0.38582	-5.14406	2.68868e-07	8.40731e-06
comp2271836_c0_seq2	1117.75	-1.56275	0.303923	-5.14193	2.71926e-07	8.49589e-06
comp2271477_c1_seq2	518.813	2.0707	0.402759	5.14127	2.72884e-07	8.51875e-06
comp2267093_c0_seq3	46.3642	2.06221	0.401312	5.13868	2.76681e-07	8.63017e-06
comp2233646_c0_seq2	18.3561	-2.95589	0.575414	-5.13699	2.7918e-07	8.68656e-06
comp2277656_c2_seq1	147.567	2.46664	0.480157	5.13715	2.78932e-07	8.68656e-06
comp2279593_c0_seq1	645.771	1.08324	0.210866	5.1371	2.7901e-07	8.68656e-06
comp2269144_c1_seq1	38.9799	-1.73174	0.337156	-5.13631	2.80189e-07	8.71079e-06
comp2235766_c0_seq1	104.203	2.9248	0.569551	5.13528	2.81729e-07	8.75146e-06
comp2260923_c0_seq1	670.099	1.85978	0.362247	5.13401	2.83627e-07	8.80318e-06
comp2269506_c0_seq28	1326.88	-1.78134	0.347065	-5.13258	2.85802e-07	8.8634e-06
comp2250163_c0_seq2	106.406	1.50185	0.292772	5.12975	2.90121e-07	8.98992e-06
comp2272431_c0_seq4	1360.37	-1.38668	0.270331	-5.12958	2.9039e-07	8.9909e-06
comp2244199_c0_seq1	403.502	1.60578	0.313063	5.12926	2.90876e-07	8.99856e-06
comp2261940_c0_seq1	71.0087	1.49169	0.290833	5.12903	2.91238e-07	9.00237e-06
comp2274684_c0_seq22	1234.85	-1.57877	0.307824	-5.1288	2.91599e-07	9.00617e-06
comp2224883_c0_seq1	238.865	-2.25373	0.439473	-5.12826	2.92436e-07	9.02463e-06
comp2275875_c1_seq9	198.873	-1.535	0.299439	-5.12627	2.95538e-07	9.11289e-06
comp2274727_c0_seq2	47.1853	-2.16875	0.42318	-5.12489	2.97712e-07	9.17246e-06
comp2253126_c0_seq1	187.169	-2.20606	0.430509	-5.12431	2.98624e-07	9.19305e-06
comp2251286_c0_seq6	99.1411	-2.34467	0.457624	-5.12356	2.99822e-07	9.2224e-06
comp2277229_c0_seq4	515.634	-1.23281	0.240725	-5.12126	3.03501e-07	9.32797e-06
comp2262895_c1_seq2	704.742	-1.08159	0.211458	-5.11492	3.13882e-07	9.63917e-06
comp2276621_c1_seq7	77.2848	-2.42196	0.473668	-5.1132	3.16747e-07	9.71135e-06
comp2278048_c1_seq1	233.744	-2.11974	0.41456	-5.11322	3.16718e-07	9.71135e-06
comp2234049_c0_seq2	61.1281	1.87531	0.366806	5.11255	3.17842e-07	9.72911e-06
comp2274759_c0_seq1	68.2414	2.08369	0.407554	5.11267	3.17642e-07	9.72911e-06
comp2255715_c0_seq2	71.9325	-2.53762	0.4969	-5.1069	3.2749e-07	1.00163e-05
comp2268433_c0_seq1	159.519	-2.07197	0.405742	-5.10663	3.27962e-07	1.00226e-05
comp2270444_c1_seq4	485.852	1.48755	0.291479	5.10347	3.33485e-07	1.01832e-05
comp2276985_c1_seq1	413.343	1.671	0.327505	5.1022	3.3573e-07	1.02434e-05
comp2142776_c0_seq1	39.7101	2.38173	0.466877	5.1014	3.37147e-07	1.02783e-05
comp2261728_c0_seq2	164.556	-1.35091	0.264875	-5.10017	3.39357e-07	1.03374e-05
comp2251957_c0_seq1	71.9732	-2.35037	0.460901	-5.09952	3.40517e-07	1.03598e-05
comp2265590_c1_seq4	205.654	2.15203	0.422013	5.09945	3.40641e-07	1.03598e-05
comp2270623_c2_seq1	364.192	-1.70252	0.333929	-5.09845	3.42442e-07	1.04062e-05
comp2273523_c0_seq3	1074.9	-2.30263	0.451715	-5.09753	3.44122e-07	1.04488e-05
comp2274945_c0_seq5	493.588	-1.16585	0.228743	-5.09676	3.45508e-07	1.04825e-05
comp2226330_c0_seq1	338.117	1.25501	0.246305	5.09534	3.48117e-07	1.05531e-05
comp2274615_c1_seq2	38.4724	-2.20224	0.432228	-5.0951	3.48549e-07	1.05577e-05
comp2230347_c0_seq1	470.232	0.832333	0.1634	5.09382	3.50921e-07	1.06211e-05
comp2265493_c0_seq1	3737.8	1.12365	0.220608	5.09343	3.51647e-07	1.06345e-05
comp2138945_c0_seq1	72.8142	-2.13627	0.419491	-5.09254	3.53305e-07	1.06761e-05
comp2277995_c0_seq1	6385.78	1.55902	0.306201	5.09149	3.55263e-07	1.07267e-05
comp2276978_c1_seq1	314.777	2.25496	0.443026	5.08991	3.58233e-07	1.08077e-05
comp2248195_c0_seq2	42.5625	-1.70158	0.334316	-5.08975	3.5853e-07	1.0808e-05
r-opsin1	31.8073	-3.01234	0.591961	-5.08875	3.60435e-07	1.08568e-05
comp2267733_c0_seq1	10529.9	1.84629	0.362934	5.08711	3.63555e-07	1.0942e-05
comp2227194_c1_seq1	77.0866	2.46496	0.484575	5.08684	3.64071e-07	1.09488e-05
comp2254390_c0_seq1	267.481	1.18934	0.233825	5.08644	3.6484e-07	1.09632e-05
comp2247536_c0_seq1	102.532	-2.00403	0.394017	-5.08615	3.65414e-07	1.09717e-05
comp2252040_c0_seq1	82.6949	2.15643	0.424028	5.08559	3.66477e-07	1.09949e-05
comp2269671_c0_seq2	12662.4	-1.9097	0.375532	-5.08533	3.66986e-07	1.10014e-05
comp2200976_c0_seq2	14.3993	-2.59958	0.511428	-5.08299	3.71543e-07	1.11292e-05
comp2262630_c5_seq2	70.3729	-1.98034	0.389724	-5.08138	3.74695e-07	1.12147e-05
comp2273676_c0_seq1	1662.86	-1.21352	0.23889	-5.07981	3.77807e-07	1.12989e-05
comp2255620_c0_seq2	268.655	-1.58739	0.312501	-5.07964	3.78142e-07	1.12999e-05
gnl|Pdu_trscr_assembly_1|333834	135.872	-1.66606	0.328121	-5.07758	3.82264e-07	1.14141e-05
comp2253158_c0_seq1	50.1436	-1.88915	0.372298	-5.07429	3.88943e-07	1.16043e-05
comp2263558_c3_seq9	1574.66	-1.99778	0.393823	-5.07279	3.92018e-07	1.16868e-05
comp2261186_c1_seq4	95.7025	1.62142	0.319885	5.06876	4.00422e-07	1.1928e-05
comp1970723_c0_seq1	1943.31	1.19218	0.23524	5.06794	4.0215e-07	1.197e-05
comp2250056_c0_seq1	545.215	1.82011	0.359166	5.06759	4.02892e-07	1.19826e-05
comp2266652_c1_seq5	32.7349	-2.99124	0.590293	-5.06739	4.03317e-07	1.19858e-05
comp2274272_c1_seq1	625.437	-2.45117	0.483804	-5.06645	4.05308e-07	1.20355e-05
comp2253379_c0_seq1	741.883	-1.48039	0.292233	-5.0658	4.06682e-07	1.20668e-05
gnl|Pdu_trscr_assembly_1|15988	134.897	-2.0008	0.395361	-5.0607	4.17718e-07	1.23845e-05
comp2278099_c1_seq2	1787.74	1.1871	0.234642	5.0592	4.2103e-07	1.24729e-05
comp2277414_c0_seq1	371.44	-1.6159	0.31942	-5.05884	4.21804e-07	1.2486e-05
comp2271179_c1_seq1	182.997	2.26464	0.448148	5.05332	4.34192e-07	1.28427e-05
comp2266433_c1_seq1	55.1686	2.97533	0.588845	5.05283	4.35307e-07	1.28656e-05
comp2278373_c0_seq1	2774.17	1.9493	0.385816	5.0524	4.36283e-07	1.28844e-05
comp2249213_c0_seq3	25.0956	-2.48644	0.49251	-5.04851	4.45277e-07	1.31294e-05
comp2278485_c0_seq1	4429.59	1.28655	0.254832	5.04861	4.45025e-07	1.31294e-05
comp2225625_c0_seq1	14.4162	-3.35409	0.66443	-5.04807	4.46295e-07	1.31389e-05
comp2234167_c0_seq3	681.854	-1.12969	0.223787	-5.04808	4.46278e-07	1.31389e-05
comp2242540_c0_seq1	17.9148	2.63257	0.521778	5.04539	4.526e-07	1.33141e-05
comp2270286_c0_seq1	236.261	2.26293	0.448602	5.04441	4.54932e-07	1.33723e-05
comp2255251_c0_seq1	58.5582	-2.15854	0.427977	-5.04359	4.5688e-07	1.34191e-05
comp2252741_c0_seq1	10.68	-2.3373	0.463604	-5.04159	4.61676e-07	1.35494e-05
comp2276210_c0_seq2	2582.87	-1.24554	0.247068	-5.04128	4.62418e-07	1.35607e-05
comp2280482_c0_seq1	275.294	2.19684	0.435798	5.04096	4.63205e-07	1.35732e-05
comp2273870_c0_seq3	208.21	1.44544	0.28697	5.03691	4.73102e-07	1.38524e-05
comp2271913_c0_seq11	1539.27	1.91693	0.380974	5.03165	4.86271e-07	1.4227e-05
comp2253037_c0_seq10	164.009	2.60092	0.517204	5.02881	4.93546e-07	1.44287e-05
comp2266173_c0_seq2	19.3668	-2.35692	0.468716	-5.02845	4.94452e-07	1.4444e-05
gnl|Pdu_trscr_assembly_1|9255	72.4626	2.15768	0.429314	5.02587	5.01159e-07	1.46286e-05
comp2255197_c0_seq1	21.6024	2.67692	0.532741	5.0248	5.03967e-07	1.46992e-05
comp2277602_c1_seq2	1126.52	-1.87824	0.373872	-5.02375	5.06718e-07	1.4768e-05
comp2223422_c0_seq1	407.809	1.1819	0.235282	5.02335	5.07779e-07	1.47761e-05
comp2277345_c0_seq7	614.909	-1.86769	0.371795	-5.02344	5.07533e-07	1.47761e-05
comp2262226_c0_seq6	210.911	1.20874	0.240637	5.02309	5.08475e-07	1.4785e-05
comp2263428_c0_seq1	47.5095	1.96743	0.391719	5.02254	5.09913e-07	1.48039e-05
comp2275107_c0_seq4	3642.38	2.04673	0.407503	5.0226	5.09753e-07	1.48039e-05
comp2258868_c0_seq2	209.142	-1.63961	0.326462	-5.02237	5.10366e-07	1.48057e-05
comp2225897_c0_seq1	485.174	1.03118	0.20535	5.02155	5.12567e-07	1.48581e-05
comp2262875_c0_seq2	126.937	1.91094	0.380584	5.02107	5.13841e-07	1.48836e-05
gnl|Pdu_trscr_assembly_1|200861	314.809	-1.60528	0.319756	-5.02033	5.15831e-07	1.49298e-05
comp2261692_c0_seq2	300.567	-2.08636	0.415674	-5.01922	5.18819e-07	1.50048e-05
comp2269180_c0_seq3	44.799	-2.44962	0.488233	-5.01732	5.23959e-07	1.51419e-05
comp2248335_c1_seq1	31.8207	-1.95114	0.389404	-5.01059	5.42628e-07	1.56694e-05
comp2215664_c0_seq1	125.68	-1.53502	0.306551	-5.00739	5.51723e-07	1.59198e-05
comp2268946_c0_seq1	138.158	2.29476	0.458389	5.00613	5.55341e-07	1.6012e-05
comp2138260_c0_seq2	31.2785	2.58931	0.517312	5.00532	5.57697e-07	1.60676e-05
comp2274511_c1_seq2	1295.73	-1.44639	0.289	-5.0048	5.592e-07	1.60986e-05
comp2264117_c0_seq1	20.8418	-2.49971	0.499539	-5.00403	5.61432e-07	1.61506e-05
comp2268950_c0_seq1	33.8428	2.05044	0.409825	5.00322	5.63813e-07	1.62067e-05
comp2252019_c0_seq1	153.229	1.75121	0.350077	5.00234	5.66392e-07	1.62685e-05
comp2278199_c2_seq1	896.548	-1.64895	0.329788	-5.00003	5.73218e-07	1.6452e-05
comp2277144_c0_seq3	608.359	-1.55466	0.310964	-4.99948	5.74863e-07	1.64867e-05
gnl|Pdu_trscr_assembly_1|19681	18666	-0.97535	0.19511	-4.99898	5.76347e-07	1.65167e-05
comp2219624_c0_seq2	43.0355	-2.42448	0.485212	-4.99675	5.83049e-07	1.66834e-05
comp2248410_c0_seq1	124.992	1.57783	0.315771	4.99675	5.83033e-07	1.66834e-05
comp2219827_c0_seq2	19.2549	-2.60204	0.52107	-4.99365	5.92481e-07	1.69405e-05
comp2266000_c0_seq1	434.554	-1.86354	0.37322	-4.99314	5.94065e-07	1.69729e-05
comp2267074_c0_seq1	224.809	1.85139	0.370842	4.9924	5.96334e-07	1.70185e-05
comp2273755_c0_seq2	370.845	-2.27346	0.45539	-4.99233	5.96563e-07	1.70185e-05
comp2259091_c0_seq3	28.8466	-1.98273	0.397191	-4.99187	5.97963e-07	1.70456e-05
comp2272214_c0_seq3	325.024	1.41146	0.282767	4.99158	5.98871e-07	1.70586e-05
comp2254672_c0_seq1	162.249	-1.50055	0.300649	-4.99102	6.00613e-07	1.70953e-05
comp2267278_c0_seq1	289.559	-1.50318	0.301198	-4.99069	6.01654e-07	1.7112e-05
comp2138942_c0_seq1	199.221	1.85003	0.37083	4.98888	6.0729e-07	1.72593e-05
comp2272998_c0_seq1	337.943	-1.17383	0.23546	-4.98525	6.18823e-07	1.75738e-05
comp2271436_c0_seq10	1273.57	3.00924	0.603703	4.98464	6.20786e-07	1.76163e-05
comp2261716_c0_seq2	4313.05	1.66351	0.333883	4.9823	6.28319e-07	1.78167e-05
comp2254594_c0_seq1	87.6834	1.77744	0.356841	4.98103	6.32455e-07	1.79205e-05
comp2256463_c0_seq1	31.4352	-1.72242	0.345846	-4.98031	6.34816e-07	1.79739e-05
comp2276143_c0_seq2	303.284	2.74072	0.550331	4.98013	6.35428e-07	1.79777e-05
comp2268718_c0_seq1	76.0576	2.63758	0.529664	4.97973	6.36719e-07	1.80008e-05
comp2277203_c0_seq4	1689.06	-1.30836	0.262782	-4.97887	6.39561e-07	1.80676e-05
comp2272118_c0_seq11	3428.15	-1.44911	0.291206	-4.97625	6.48273e-07	1.83e-05
comp2263577_c0_seq1	653.195	1.4211	0.285801	4.97234	6.61496e-07	1.86538e-05
comp2278583_c0_seq1	687.895	1.16766	0.234835	4.97225	6.61795e-07	1.86538e-05
comp2279404_c0_seq1	47.6238	2.65073	0.533136	4.97195	6.62817e-07	1.86687e-05
comp2188296_c0_seq1	332.71	1.21792	0.244984	4.97144	6.64568e-07	1.8704e-05
comp1615018_c0_seq1	613.235	1.89401	0.381033	4.97072	6.67034e-07	1.87595e-05
comp2275684_c1_seq2	504.121	1.55088	0.31204	4.97013	6.69093e-07	1.88034e-05
comp2268374_c0_seq2	63.9441	2.59165	0.521475	4.96985	6.70042e-07	1.8816e-05
comp2274196_c1_seq2	164.518	1.48131	0.298081	4.96948	6.71333e-07	1.88383e-05
comp2241874_c0_seq1	148.49	-2.1594	0.434576	-4.96897	6.73103e-07	1.88739e-05
comp2255158_c0_seq2	34.4029	2.57925	0.519234	4.96741	6.78526e-07	1.90118e-05
comp2268231_c0_seq2	109.463	-1.60534	0.323261	-4.96609	6.8315e-07	1.91272e-05
comp2275494_c0_seq2	11313.3	-1.69865	0.342128	-4.96495	6.87183e-07	1.92258e-05
comp2270954_c0_seq2	352.154	1.82858	0.368355	4.96418	6.89917e-07	1.9288e-05
comp2140537_c0_seq1	161.108	-2.2401	0.451276	-4.96393	6.90814e-07	1.92988e-05
comp2262932_c0_seq1	95.0921	1.88723	0.380226	4.96344	6.92547e-07	1.93329e-05
comp2262403_c0_seq2	359.51	-1.30151	0.262235	-4.96314	6.93609e-07	1.93483e-05
comp2277760_c1_seq1	242.32	-1.29081	0.260161	-4.96159	6.9919e-07	1.94895e-05
comp2264743_c0_seq3	1992.3	1.39698	0.281603	4.9608	7.02024e-07	1.95541e-05
comp2257348_c0_seq3	14.4043	2.96725	0.59826	4.9598	7.05653e-07	1.96407e-05
comp2260442_c0_seq1	76.9626	-2.11853	0.427289	-4.95808	7.1195e-07	1.98013e-05
comp2192188_c0_seq2	1124.6	-0.946212	0.19095	-4.95528	7.22252e-07	2.00731e-05
comp2273099_c0_seq3	1256.39	-1.96847	0.397401	-4.95336	7.29424e-07	2.02575e-05
gnl|Pdu_trscr_assembly_1|19046	171.01	-1.78914	0.361226	-4.95298	7.30836e-07	2.02818e-05
comp2263728_c0_seq1	595.125	-3.01235	0.608445	-4.9509	7.38705e-07	2.04814e-05
comp2276613_c0_seq12	2374.1	-1.14985	0.232257	-4.95079	7.39113e-07	2.04814e-05
comp2272937_c0_seq1	2033.71	1.15009	0.232319	4.95047	7.40329e-07	2.05e-05
comp2271755_c0_seq2	3533.31	-2.58459	0.522132	-4.95008	7.41836e-07	2.05267e-05
comp2278597_c0_seq3	1552.49	1.8788	0.379573	4.94978	7.42989e-07	2.05435e-05
comp2220677_c0_seq1	681.623	-2.80597	0.566945	-4.94928	7.44899e-07	2.05812e-05
comp2242373_c0_seq1	88.7913	-1.84031	0.372138	-4.94522	7.60587e-07	2.09993e-05
comp2260692_c0_seq3	88.2858	1.40533	0.284338	4.94247	7.7138e-07	2.12818e-05
comp2257281_c0_seq1	263.225	1.97129	0.398947	4.94124	7.76288e-07	2.14015e-05
comp2277636_c1_seq2	3039.38	-1.79903	0.364113	-4.94086	7.7779e-07	2.14273e-05
comp2263011_c0_seq1	4425.61	-2.07571	0.420193	-4.9399	7.8164e-07	2.15176e-05
comp2256304_c0_seq1	63.8856	2.29094	0.463836	4.93912	7.84739e-07	2.15872e-05
comp2256808_c0_seq1	373.479	1.39794	0.28305	4.93885	7.8583e-07	2.16014e-05
comp2274537_c0_seq28	10441.5	-2.27883	0.461755	-4.93514	8.00917e-07	2.20001e-05
comp2267712_c0_seq1	97.221	-2.13692	0.433166	-4.93327	8.08645e-07	2.21953e-05
comp2269238_c0_seq1	398.504	-1.45374	0.294688	-4.93314	8.09197e-07	2.21953e-05
comp2241506_c0_seq1	164.754	1.57549	0.31953	4.93064	8.19593e-07	2.24641e-05
comp2207383_c0_seq1	14.2548	-3.43322	0.696347	-4.93033	8.20892e-07	2.24671e-05
comp2220070_c0_seq2	96.9529	-1.38433	0.280772	-4.93043	8.20488e-07	2.24671e-05
comp2258103_c0_seq1	176.11	1.38335	0.280603	4.92991	8.22669e-07	2.24994e-05
comp2245811_c0_seq1	1752.51	1.63432	0.331645	4.92792	8.31085e-07	2.27131e-05
comp2276386_c0_seq1	4991.37	-1.64065	0.333024	-4.92653	8.37049e-07	2.28596e-05
comp2273480_c0_seq4	63.3111	-2.32286	0.471642	-4.92504	8.43424e-07	2.30004e-05
comp2274622_c0_seq4	43.8953	-1.53729	0.312132	-4.92512	8.43073e-07	2.30004e-05
comp2230534_c0_seq1	13.3883	-2.35896	0.479326	-4.92142	8.59204e-07	2.34138e-05
comp2249204_c0_seq1	165.879	1.92797	0.391878	4.91982	8.66223e-07	2.3588e-05
gnl|Pdu_trscr_assembly_1|915	336.874	-1.59639	0.324591	-4.91816	8.73598e-07	2.37717e-05
comp2141575_c0_seq1	70.7451	-3.05684	0.621566	-4.91797	8.74455e-07	2.37779e-05
gnl|Pdu_trscr_assembly_1|1345	1938.41	-2.0723	0.421548	-4.91592	8.83666e-07	2.4011e-05
comp2249971_c0_seq2	30.8777	-2.46614	0.501995	-4.91267	8.9845e-07	2.43952e-05
comp2278422_c0_seq1	3716.68	-2.35067	0.478549	-4.91208	9.01139e-07	2.44506e-05
comp2267190_c1_seq5	127.352	2.17643	0.443175	4.91098	9.06209e-07	2.45705e-05
comp2277418_c0_seq1	4583.23	-1.47528	0.30042	-4.91072	9.07406e-07	2.45853e-05
comp2275893_c0_seq1	9017.89	2.45564	0.500083	4.91046	9.08622e-07	2.46006e-05
comp1193891_c0_seq1	430.917	-2.17164	0.442296	-4.90993	9.1111e-07	2.46502e-05
gnl|Pdu_trscr_assembly_1|22617	143.475	1.61935	0.329883	4.90886	9.16096e-07	2.47674e-05
comp2265896_c0_seq2	138.343	2.50878	0.511643	4.90339	9.41981e-07	2.5449e-05
comp2221987_c0_seq1	10.8675	-2.80995	0.573379	-4.90069	9.54996e-07	2.57822e-05
comp2254377_c0_seq1	56.0199	-2.86232	0.584211	-4.89946	9.60983e-07	2.59252e-05
comp2268968_c0_seq3	268.45	1.04228	0.212818	4.89749	9.70699e-07	2.61563e-05
comp2273239_c1_seq1	116.422	1.22817	0.250777	4.89744	9.70932e-07	2.61563e-05
comp2222175_c0_seq1	32.8955	-1.82146	0.372183	-4.894	9.88053e-07	2.65985e-05
comp2226307_c0_seq1	50.2584	2.0338	0.415626	4.89335	9.9133e-07	2.66677e-05
comp2260463_c0_seq3	86.0083	2.16244	0.442316	4.88891	1.01397e-06	2.72573e-05
comp2140981_c0_seq1	349.016	2.06873	0.423348	4.88659	1.02599e-06	2.75608e-05
comp2269100_c0_seq1	297.799	-1.14309	0.234149	-4.8819	1.05067e-06	2.82037e-05
comp2269806_c0_seq1	239.037	-1.68893	0.345973	-4.88168	1.05186e-06	2.82157e-05
comp2271726_c1_seq1	21.745	-2.89199	0.592642	-4.87983	1.06177e-06	2.84612e-05
comp2261597_c0_seq13	251.886	-1.59224	0.326391	-4.8783	1.07002e-06	2.865e-05
comp2273019_c0_seq5	813.41	-1.34826	0.276383	-4.87825	1.07033e-06	2.865e-05
comp2273472_c0_seq1	503.156	-1.89781	0.389061	-4.87791	1.07214e-06	2.86779e-05
comp2274464_c1_seq2	127.476	2.1922	0.449451	4.87749	1.07442e-06	2.87188e-05
comp2277588_c0_seq3	324.029	-1.3071	0.268025	-4.87679	1.07824e-06	2.88003e-05
comp1376985_c0_seq1	10.9944	-2.5748	0.528087	-4.8757	1.08421e-06	2.89394e-05
comp2245625_c0_seq3	31.8336	-1.91939	0.393687	-4.87543	1.08574e-06	2.89597e-05
comp2233700_c0_seq1	90.1252	1.96543	0.403156	4.87509	1.08756e-06	2.89879e-05
comp2257469_c0_seq1	34.1799	2.04163	0.41887	4.87414	1.09285e-06	2.91081e-05
comp2260239_c0_seq1	4935.86	-1.05325	0.216109	-4.8737	1.09529e-06	2.91527e-05
comp2213506_c0_seq1	260.252	1.79022	0.367343	4.87342	1.0968e-06	2.91723e-05
comp2270756_c0_seq2	82.6267	-1.75923	0.361097	-4.87189	1.10535e-06	2.93789e-05
comp2247881_c0_seq1	194.635	1.44976	0.297726	4.86944	1.11912e-06	2.97241e-05
comp1988763_c0_seq1	3350.94	1.14999	0.236262	4.86743	1.13061e-06	2.9987e-05
comp2138964_c0_seq1	224.006	1.57623	0.323826	4.86752	1.1301e-06	2.9987e-05
comp2269064_c0_seq7	227.105	-1.93499	0.39756	-4.86717	1.1321e-06	2.99976e-05
comp2276588_c0_seq4	232.859	1.32993	0.27325	4.86708	1.1326e-06	2.99976e-05
comp2249497_c0_seq2	2358.61	-1.91608	0.39391	-4.86425	1.14893e-06	3.03849e-05
comp2250036_c0_seq1	670.089	1.99792	0.410742	4.86417	1.14935e-06	3.03849e-05
comp2269767_c0_seq1	188.857	1.65491	0.340228	4.86413	1.14964e-06	3.03849e-05
comp2146953_c0_seq1	14.7818	-2.51628	0.517389	-4.86342	1.15373e-06	3.04717e-05
comp2266472_c0_seq2	176.484	-1.05235	0.216392	-4.86314	1.15537e-06	3.04938e-05
comp2271157_c0_seq2	110.707	1.43119	0.294446	4.86062	1.17017e-06	3.08628e-05
comp2273176_c1_seq6	560.044	1.22101	0.251411	4.85664	1.19393e-06	3.14674e-05
comp2277084_c2_seq1	207.251	2.40544	0.495311	4.85641	1.19531e-06	3.14817e-05
comp2262796_c0_seq1	269.32	1.02057	0.210252	4.85402	1.20984e-06	3.18423e-05
comp2260456_c0_seq2	4819.2	-2.26737	0.467151	-4.85361	1.21237e-06	3.18798e-05
comp2271279_c0_seq2	195.098	-1.98037	0.408028	-4.85351	1.21296e-06	3.18798e-05
comp2263454_c0_seq6	182.774	-1.15086	0.237298	-4.84985	1.23552e-06	3.24503e-05
comp2263879_c0_seq1	29.4662	2.25422	0.464939	4.84841	1.24456e-06	3.26649e-05
comp2206043_c0_seq1	14.7486	2.95596	0.610078	4.84522	1.26469e-06	3.31703e-05
comp2261428_c0_seq1	34286.4	1.29862	0.268087	4.84404	1.27224e-06	3.33449e-05
comp1847822_c0_seq1	24.61	-2.74622	0.566956	-4.8438	1.27379e-06	3.33625e-05
comp2276086_c0_seq5	257.067	-2.29249	0.473613	-4.84042	1.29564e-06	3.39112e-05
comp2257923_c0_seq2	402.351	1.30493	0.269659	4.8392	1.30362e-06	3.40728e-05
comp2259773_c0_seq1	53.6433	2.06079	0.425844	4.83931	1.30288e-06	3.40728e-05
comp2269425_c0_seq2	216.94	-2.28603	0.472491	-4.83824	1.30992e-06	3.42138e-05
comp2278058_c0_seq17	1963.43	-1.62084	0.335043	-4.83771	1.31346e-06	3.42826e-05
comp2264460_c0_seq3	47.3462	2.29732	0.474901	4.83748	1.31494e-06	3.42975e-05
comp2256613_c0_seq1	1304.58	2.12775	0.43995	4.83633	1.32257e-06	3.44728e-05
comp2278087_c0_seq7	882.717	-1.58663	0.328227	-4.83396	1.33846e-06	3.48627e-05
comp2254586_c0_seq1	4710.02	1.93596	0.400519	4.83364	1.3406e-06	3.48943e-05
comp2277656_c1_seq1	373.152	2.40273	0.49725	4.83204	1.35142e-06	3.51517e-05
comp2141175_c0_seq1	195.581	1.63391	0.338168	4.83164	1.35411e-06	3.51976e-05
comp2277261_c0_seq8	101.103	-1.50226	0.311088	-4.82904	1.37195e-06	3.56368e-05
comp2261767_c1_seq3	34.2997	-2.3128	0.478996	-4.82844	1.37604e-06	3.56848e-05
comp2268797_c0_seq2	87.4813	2.5185	0.521601	4.82841	1.37629e-06	3.56848e-05
comp2278592_c0_seq3	399.739	1.2194	0.25255	4.82836	1.37664e-06	3.56848e-05
comp2239040_c0_seq1	116.282	1.67277	0.346512	4.82746	1.38287e-06	3.58218e-05
comp2265105_c0_seq1	216.812	-1.35866	0.281458	-4.82723	1.38447e-06	3.58386e-05
comp2277723_c0_seq7	357.839	2.19063	0.453831	4.82698	1.38622e-06	3.58594e-05
comp2267437_c1_seq1	1367.82	1.57042	0.325409	4.82599	1.39311e-06	3.60127e-05
comp2257556_c0_seq4	273.835	2.02089	0.419177	4.8211	1.42772e-06	3.68622e-05
comp2265986_c0_seq1	4082.66	-1.6181	0.335638	-4.82097	1.42864e-06	3.68622e-05
comp2275304_c1_seq1	108.753	-1.19784	0.248466	-4.82093	1.42889e-06	3.68622e-05
comp2259529_c0_seq1	2072.67	1.80523	0.374476	4.82068	1.43066e-06	3.68826e-05
comp2264313_c1_seq14	21.2189	2.49153	0.517159	4.81772	1.4521e-06	3.74098e-05
comp2224402_c0_seq2	12.7337	-2.54268	0.527929	-4.81633	1.46221e-06	3.76188e-05
comp2265744_c0_seq2	357.116	-2.19779	0.456321	-4.81634	1.46218e-06	3.76188e-05
comp2261136_c0_seq5	16.6552	2.86945	0.595949	4.81493	1.47249e-06	3.78574e-05
comp2273340_c1_seq1	667.198	1.36468	0.283448	4.81455	1.47528e-06	3.79034e-05
comp2216167_c0_seq4	1699.25	-1.54174	0.320289	-4.81359	1.48246e-06	3.80619e-05
comp2258703_c0_seq1	11.3407	-2.85705	0.593801	-4.81147	1.49827e-06	3.84418e-05
comp2128864_c0_seq1	301.721	1.18717	0.246931	4.80771	1.52671e-06	3.91447e-05
gnl|Pdu_trscr_assembly_1|16667	1086.61	-1.38458	0.288064	-4.80649	1.53602e-06	3.93567e-05
comp2267727_c0_seq2	162.527	1.81992	0.378663	4.80617	1.53847e-06	3.93927e-05
comp2245288_c0_seq1	17.7897	-2.23709	0.465514	-4.80563	1.54262e-06	3.94723e-05
comp2267958_c0_seq3	1158.6	-0.98849	0.205707	-4.80533	1.545e-06	3.94796e-05
comp2271735_c0_seq3	333.924	-2.04887	0.426369	-4.80539	1.54452e-06	3.94796e-05
comp2268453_c0_seq1	1002.33	-1.74547	0.363253	-4.8051	1.54674e-06	3.94974e-05
comp2261818_c0_seq3	73.8254	-2.45899	0.51178	-4.80478	1.54923e-06	3.95075e-05
comp2278486_c0_seq6	4189.34	-1.29655	0.269842	-4.80485	1.54864e-06	3.95075e-05
comp2270224_c0_seq1	356.399	1.01887	0.212112	4.80347	1.55939e-06	3.97397e-05
comp2276455_c0_seq2	117.603	-1.95351	0.406802	-4.80212	1.56993e-06	3.99814e-05
comp2245862_c0_seq1	51.12	1.76436	0.367567	4.80011	1.5858e-06	4.03472e-05
comp2275312_c0_seq8	27070	2.51845	0.524675	4.80003	1.58644e-06	4.03472e-05
comp2246244_c0_seq1	332.364	-2.83734	0.591128	-4.79987	1.58766e-06	4.03511e-05
comp2272100_c0_seq3	407.752	-2.12571	0.442898	-4.79956	1.59014e-06	4.0387e-05
comp2264985_c0_seq2	74.1142	1.98484	0.413678	4.79802	1.60245e-06	4.06722e-05
comp2265883_c1_seq1	26696	-0.846216	0.17642	-4.7966	1.6138e-06	4.09329e-05
comp2269507_c0_seq2	134.986	-1.52669	0.318326	-4.79598	1.61881e-06	4.10323e-05
comp2269758_c0_seq1	265.188	1.62052	0.337947	4.79521	1.62506e-06	4.11631e-05
comp2261897_c0_seq2	252.691	-2.23969	0.467132	-4.79456	1.63034e-06	4.12692e-05
comp2254352_c0_seq3	323.906	-1.30412	0.272117	-4.7925	1.6472e-06	4.16679e-05
comp2138099_c0_seq1	445.94	2.31552	0.483186	4.79219	1.64967e-06	4.17025e-05
comp2265181_c0_seq1	1736.8	1.6812	0.350841	4.79191	1.65201e-06	4.17338e-05
gnl|Pdu_trscr_assembly_1|1332	1956.75	1.25393	0.261818	4.78932	1.67345e-06	4.22373e-05
comp2273899_c0_seq2	239.305	1.54683	0.322988	4.78914	1.67501e-06	4.22373e-05
comp2276105_c0_seq6	193.079	-1.1959	0.24972	-4.78897	1.67638e-06	4.22373e-05
comp2277456_c0_seq1	2550.26	-1.78136	0.371972	-4.78897	1.67642e-06	4.22373e-05
comp2262145_c0_seq1	5214.68	-1.23155	0.257487	-4.78295	1.72744e-06	4.34937e-05
comp2265840_c0_seq3	144.804	-2.24053	0.46862	-4.78113	1.74312e-06	4.38593e-05
comp2256852_c0_seq1	413.836	1.24887	0.261274	4.77992	1.75367e-06	4.40952e-05
comp2252656_c0_seq1	140.05	1.40482	0.293974	4.77873	1.76406e-06	4.42974e-05
comp2276790_c0_seq3	1006.59	2.06564	0.432249	4.77882	1.7633e-06	4.42974e-05
comp2270975_c1_seq8	311.227	2.11574	0.442804	4.77805	1.77006e-06	4.44187e-05
comp2276182_c0_seq1	777.181	1.12274	0.234999	4.77762	1.77382e-06	4.44835e-05
comp2240770_c0_seq3	25.424	2.74526	0.574904	4.77516	1.79563e-06	4.49705e-05
comp2271752_c0_seq3	214.229	-1.46391	0.306559	-4.77529	1.79448e-06	4.49705e-05
comp2265919_c1_seq23	1826.74	2.0104	0.42108	4.77439	1.80255e-06	4.5114e-05
comp1192934_c0_seq1	223.785	-2.31201	0.48435	-4.77343	1.81118e-06	4.52998e-05
comp2260564_c0_seq1	144.543	1.06245	0.222592	4.77308	1.8143e-06	4.53178e-05
comp2270346_c1_seq2	283.417	-1.04746	0.219445	-4.77321	1.8131e-06	4.53178e-05
comp2260953_c0_seq2	1448.91	1.31255	0.275012	4.7727	1.81768e-06	4.53724e-05
comp2257938_c0_seq6	137.962	-1.51153	0.31675	-4.77201	1.82396e-06	4.5499e-05
comp2272751_c0_seq7	185.172	1.28462	0.269265	4.77086	1.83441e-06	4.57293e-05
comp2276539_c0_seq2	1207.69	1.09916	0.230425	4.77015	1.84087e-06	4.58602e-05
comp2265205_c2_seq7	81.5399	2.44169	0.512013	4.76881	1.85316e-06	4.61359e-05
comp2249778_c0_seq2	56.3039	-1.96664	0.412447	-4.76822	1.85863e-06	4.62415e-05
comp2275548_c0_seq1	1003.67	1.21964	0.255838	4.76722	1.86787e-06	4.64409e-05
comp2277416_c0_seq3	5644.57	2.33066	0.489019	4.76599	1.87925e-06	4.66931e-05
comp2266805_c0_seq1	46.0009	2.25377	0.472913	4.76571	1.88187e-06	4.67274e-05
comp2258198_c0_seq1	210.348	0.952444	0.199894	4.76474	1.891e-06	4.69232e-05
comp2115354_c1_seq1	118.476	2.20656	0.463198	4.76375	1.90027e-06	4.71223e-05
comp2256140_c0_seq1	110.158	1.63049	0.342431	4.76151	1.92151e-06	4.76177e-05
comp2232787_c0_seq1	83.98	1.40462	0.295011	4.76124	1.92411e-06	4.76507e-05
comp2276171_c4_seq1	456.222	1.61272	0.338748	4.76082	1.92809e-06	4.7718e-05
comp2260302_c0_seq2	502.663	2.10795	0.442803	4.76046	1.93156e-06	4.77726e-05
gnl|Pdu_trscr_assembly_1|1056	1351.8	-1.87957	0.394893	-4.7597	1.93884e-06	4.79212e-05
comp2266986_c0_seq3	257.456	2.80455	0.589373	4.75853	1.95008e-06	4.81675e-05
comp2242780_c0_seq2	15.686	-2.40441	0.505335	-4.75805	1.95475e-06	4.82514e-05
comp2267410_c0_seq2	44.7586	2.14559	0.450984	4.75757	1.95937e-06	4.83336e-05
comp2239542_c0_seq1	12.0039	2.74743	0.577538	4.75714	1.96354e-06	4.83734e-05
comp2259138_c0_seq2	74.3296	-2.07701	0.436606	-4.75717	1.96328e-06	4.83734e-05
comp2138467_c0_seq1	100.925	1.33807	0.28136	4.75572	1.9774e-06	4.86831e-05
comp2219607_c0_seq1	19.8502	-2.43632	0.51235	-4.7552	1.98253e-06	4.87775e-05
comp2258718_c0_seq1	56.8872	-2.11175	0.444168	-4.7544	1.99036e-06	4.89383e-05
comp2010559_c0_seq1	583.732	-1.17337	0.246807	-4.75422	1.99215e-06	4.89502e-05
comp2275258_c0_seq6	2310.6	1.41925	0.298578	4.75335	2.00076e-06	4.91298e-05
comp2266758_c1_seq1	1648.05	1.85385	0.390038	4.753	2.00418e-06	4.91819e-05
comp2241517_c0_seq3	853.525	-1.37098	0.288459	-4.75277	2.00644e-06	4.92054e-05
comp2269675_c1_seq8	641.734	1.37023	0.288334	4.75225	2.01164e-06	4.93008e-05
comp1665789_c0_seq1	69.4044	2.87701	0.605442	4.75192	2.01498e-06	4.93506e-05
comp2264505_c0_seq2	72.3994	2.21922	0.467127	4.75078	2.02636e-06	4.95973e-05
comp2271525_c0_seq4	113.098	1.37236	0.288885	4.75056	2.02855e-06	4.96185e-05
comp2272091_c0_seq2	556.16	1.55742	0.327891	4.74981	2.03611e-06	4.97442e-05
comp2274644_c1_seq40	1293.29	-1.2709	0.26757	-4.74979	2.03632e-06	4.97442e-05
comp2210246_c0_seq1	21.1084	2.38141	0.501422	4.7493	2.04117e-06	4.98305e-05
comp2252128_c0_seq9	2016.52	-1.24283	0.261775	-4.74769	2.05749e-06	5.01963e-05
comp2254631_c0_seq1	5511.67	-1.87783	0.395737	-4.74515	2.08355e-06	5.07993e-05
comp2235040_c0_seq1	178.595	-1.22857	0.258978	-4.74392	2.09623e-06	5.10755e-05
comp2254585_c0_seq3	1422.44	-1.305	0.275158	-4.74273	2.10853e-06	5.1342e-05
comp2263026_c0_seq1	82.2523	-1.99676	0.421068	-4.74214	2.11472e-06	5.14596e-05
comp2226296_c1_seq1	17.8053	-1.98203	0.418072	-4.74089	2.12784e-06	5.17455e-05
comp2266368_c0_seq1	443.78	-1.54966	0.326965	-4.73953	2.14217e-06	5.20604e-05
comp2268336_c0_seq2	833.226	1.67436	0.353298	4.73923	2.14534e-06	5.21039e-05
comp2268008_c0_seq3	8692.05	-1.19756	0.252722	-4.73864	2.1516e-06	5.22222e-05
comp2265240_c0_seq3	100.922	1.97994	0.41835	4.73274	2.21513e-06	5.37297e-05
comp2261667_c0_seq1	82.4825	1.69073	0.357265	4.73244	2.2184e-06	5.37745e-05
comp2270832_c0_seq5	137.314	-2.41154	0.50968	-4.73148	2.2289e-06	5.39943e-05
comp2224925_c0_seq2	19.1017	-2.27905	0.481705	-4.73122	2.23175e-06	5.40287e-05
comp2272458_c0_seq6	88.8895	2.59284	0.548148	4.73018	2.24317e-06	5.42703e-05
comp2265062_c0_seq1	377.452	0.982506	0.207776	4.72869	2.25975e-06	5.46365e-05
comp2262339_c0_seq1	12792.4	-1.43709	0.304016	-4.72702	2.27834e-06	5.50507e-05
comp2252921_c0_seq4	509.04	-1.89716	0.401374	-4.72665	2.2825e-06	5.5116e-05
comp2245616_c0_seq2	52.8736	-2.12212	0.449469	-4.72139	2.34238e-06	5.65257e-05
comp2280178_c0_seq1	793.482	2.09167	0.443051	4.72107	2.34607e-06	5.65786e-05
comp2277005_c0_seq3	920.816	-2.31151	0.489795	-4.71934	2.36606e-06	5.70242e-05
comp2252269_c1_seq2	51.4855	1.67548	0.355156	4.71759	2.38658e-06	5.74821e-05
comp2266510_c0_seq2	199.55	1.38676	0.29398	4.71718	2.39138e-06	5.75609e-05
comp2245442_c0_seq1	26.834	-2.04515	0.43358	-4.71688	2.39487e-06	5.75827e-05
comp2266864_c0_seq1	400.729	-1.84636	0.391439	-4.71684	2.39534e-06	5.75827e-05
comp2251310_c0_seq4	148.456	1.63344	0.346426	4.71512	2.41571e-06	5.80355e-05
comp2277472_c0_seq3	105.192	-1.0384	0.220375	-4.71196	2.45349e-06	5.89055e-05
comp2228369_c0_seq1	21543.9	1.34896	0.286367	4.71059	2.47006e-06	5.92657e-05
comp2267162_c0_seq2	425.477	-1.81063	0.384438	-4.70982	2.47931e-06	5.94498e-05
comp2265764_c0_seq1	63.4094	1.76865	0.375624	4.70856	2.49475e-06	5.97822e-05
comp2266341_c0_seq1	71.3133	-1.93901	0.411912	-4.70733	2.5098e-06	6.01047e-05
comp2270353_c0_seq3	939.316	1.48407	0.31538	4.70565	2.53061e-06	6.05644e-05
comp2269228_c0_seq1	4982.73	-1.01857	0.216497	-4.70479	2.54125e-06	6.07807e-05
comp2245323_c0_seq2	432.633	-2.34485	0.498496	-4.70385	2.55307e-06	6.10246e-05
comp2243318_c0_seq1	936.221	-1.831	0.389357	-4.70264	2.56824e-06	6.13485e-05
comp2268259_c0_seq2	339.954	1.09845	0.233605	4.70216	2.57419e-06	6.14517e-05
comp2252751_c0_seq1	52.9328	-2.2742	0.483698	-4.70169	2.58019e-06	6.1556e-05
gnl|Pdu_trscr_assembly_1|113632	79.3098	-1.48462	0.315827	-4.70073	2.59235e-06	6.18071e-05
gnl|Pdu_trscr_assembly_1|18248	163.143	-1.31075	0.279044	-4.69729	2.63638e-06	6.27943e-05
comp2275291_c1_seq1	372.469	1.82773	0.389109	4.69723	2.63709e-06	6.27943e-05
comp2247483_c0_seq2	244.279	1.16059	0.247128	4.6963	2.64911e-06	6.30339e-05
comp2275830_c1_seq1	46.7976	-2.0095	0.427899	-4.6962	2.65049e-06	6.30339e-05
comp2264945_c0_seq1	61.6775	1.41783	0.30195	4.69557	2.65869e-06	6.31891e-05
comp2248859_c2_seq1	44.5253	2.39531	0.510137	4.69543	2.66049e-06	6.3192e-05
comp2245426_c0_seq2	431.357	-0.959606	0.204508	-4.69226	2.70201e-06	6.41378e-05
comp2268821_c0_seq7	134.96	-2.06608	0.440355	-4.69184	2.70758e-06	6.42298e-05
comp2269924_c0_seq3	73.8046	1.69987	0.362501	4.68929	2.74153e-06	6.49943e-05
comp2276380_c0_seq21	1760.81	-1.4875	0.317238	-4.68892	2.74656e-06	6.50727e-05
comp2268127_c0_seq1	332.386	-1.29224	0.275809	-4.68528	2.79571e-06	6.61956e-05
comp2273338_c0_seq1	211.964	-1.11465	0.237925	-4.68491	2.80085e-06	6.62756e-05
comp2274031_c0_seq3	685.11	1.18388	0.252712	4.68469	2.80378e-06	6.63035e-05
comp2272695_c2_seq7	187.328	-1.40279	0.29948	-4.68408	2.81225e-06	6.64621e-05
comp2276346_c0_seq6	718.7	-1.25241	0.267395	-4.68376	2.81661e-06	6.65236e-05
comp2252285_c0_seq2	16215	0.930621	0.19872	4.68307	2.82605e-06	6.67047e-05
comp2263390_c0_seq2	2543.58	-1.39411	0.297825	-4.68098	2.85511e-06	6.73484e-05
comp2271284_c0_seq4	134.282	-2.34009	0.500065	-4.67958	2.87463e-06	6.77666e-05
comp2242968_c0_seq2	29.942	1.82073	0.389114	4.67916	2.8805e-06	6.78626e-05
comp2245391_c0_seq1	193.702	1.8846	0.402791	4.67886	2.8848e-06	6.79215e-05
comp2268331_c0_seq1	2071.34	-1.75126	0.374395	-4.67757	2.90293e-06	6.83056e-05
comp2260265_c0_seq1	12.6541	2.58813	0.553628	4.67485	2.94171e-06	6.91752e-05
comp2278387_c0_seq1	183.449	1.05279	0.225211	4.67467	2.9442e-06	6.91905e-05
comp2263854_c0_seq1	525.573	-2.04651	0.437818	-4.67434	2.94896e-06	6.92594e-05
comp2275031_c0_seq1	46.6709	2.6894	0.57551	4.67308	2.96719e-06	6.96441e-05
comp2257439_c0_seq1	65.6043	1.81676	0.388807	4.67265	2.97344e-06	6.97473e-05
gnl|Pdu_trscr_assembly_1|16880	1743.41	-2.25209	0.482172	-4.67072	3.00146e-06	7.03608e-05
comp2138264_c0_seq1	232.684	1.99484	0.427252	4.669	3.02674e-06	7.09094e-05
comp2269694_c0_seq2	384.684	1.07581	0.230591	4.66546	3.07927e-06	7.20955e-05
comp2239613_c0_seq2	195.731	2.32573	0.49858	4.66471	3.09053e-06	7.23143e-05
comp2242472_c0_seq1	72.7978	-2.34429	0.502577	-4.66455	3.09296e-06	7.23261e-05
comp2262870_c2_seq4	85.5382	1.99078	0.426943	4.66288	3.1182e-06	7.28713e-05
comp2256318_c0_seq1	149.174	2.31497	0.496569	4.66194	3.13248e-06	7.31598e-05
comp2274254_c1_seq4	350.7	1.22706	0.26331	4.66013	3.16004e-06	7.37578e-05
comp2273174_c1_seq4	139.427	2.40488	0.516103	4.65968	3.16696e-06	7.38735e-05
comp2142789_c0_seq2	183.933	1.44366	0.310009	4.65683	3.21113e-06	7.48577e-05
comp2257544_c0_seq2	412.18	-1.00663	0.216177	-4.65653	3.21579e-06	7.49199e-05
comp2221239_c0_seq1	119.718	2.28599	0.491011	4.65568	3.22916e-06	7.5149e-05
comp2272909_c0_seq4	78.7131	2.31791	0.497871	4.65565	3.2296e-06	7.5149e-05
comp2139046_c0_seq1	36.5748	-2.31316	0.496866	-4.6555	3.23199e-06	7.51581e-05
comp2270480_c0_seq1	645.373	-1.1508	0.247201	-4.6553	3.23505e-06	7.5183e-05
comp2278048_c0_seq4	950.334	-2.02592	0.435433	-4.65266	3.27678e-06	7.6106e-05
comp2257649_c0_seq1	522.456	2.49615	0.536596	4.65182	3.29012e-06	7.63688e-05
comp2261516_c0_seq2	403.285	1.40214	0.301637	4.64843	3.34474e-06	7.75889e-05
comp2234125_c0_seq2	10.8213	2.96169	0.637259	4.64756	3.35891e-06	7.77289e-05
comp2258542_c0_seq2	93.8458	-2.17376	0.467706	-4.64771	3.3564e-06	7.77289e-05
comp2268894_c0_seq4	585.58	2.52483	0.543275	4.64742	3.36107e-06	7.77289e-05
comp2274680_c0_seq1	96.0671	-1.39827	0.300857	-4.64762	3.35782e-06	7.77289e-05
comp2277902_c3_seq3	95.7599	-1.64005	0.352892	-4.64747	3.36033e-06	7.77289e-05
comp2259828_c0_seq1	69.3375	1.71254	0.368508	4.64723	3.36427e-06	7.77552e-05
comp2275263_c0_seq3	159.326	-1.94054	0.417594	-4.64697	3.36852e-06	7.78058e-05
comp2127369_c0_seq1	110.325	1.81323	0.390252	4.6463	3.37939e-06	7.79719e-05
gnl|Pdu_trscr_assembly_1|21246	25.9829	-2.24626	0.483454	-4.64627	3.37984e-06	7.79719e-05
comp2276938_c0_seq5	1340.17	-0.996579	0.21457	-4.64454	3.40834e-06	7.85812e-05
comp2264791_c0_seq4	899.3	-1.47994	0.318658	-4.6443	3.41239e-06	7.86267e-05
comp2261831_c0_seq1	24.8537	-1.92698	0.415014	-4.64318	3.43085e-06	7.90039e-05
comp2274259_c0_seq1	1042.29	0.867798	0.186926	4.64246	3.44282e-06	7.92311e-05
comp2277034_c3_seq1	102.19	-2.08002	0.448058	-4.64231	3.4453e-06	7.92398e-05
comp2278398_c1_seq3	54.6466	2.29561	0.494552	4.6418	3.45385e-06	7.93882e-05
comp2260942_c0_seq2	171.869	-1.08733	0.23428	-4.64117	3.46446e-06	7.95835e-05
comp2276599_c1_seq1	169.5	1.47498	0.317834	4.64073	3.47186e-06	7.9705e-05
comp2273962_c0_seq6	231.407	-1.88382	0.406018	-4.63975	3.48828e-06	8.00333e-05
comp2273455_c0_seq2	726.775	-1.19234	0.257036	-4.6388	3.50446e-06	8.03557e-05
comp2276252_c0_seq1	209.182	1.36659	0.294691	4.63737	3.52877e-06	8.0864e-05
comp2277430_c0_seq5	198.748	1.74635	0.376634	4.63674	3.53952e-06	8.1061e-05
comp2266367_c0_seq1	21.308	2.46008	0.530773	4.6349	3.57108e-06	8.17341e-05
comp2250017_c0_seq1	152.775	1.13245	0.244349	4.63456	3.5769e-06	8.18178e-05
comp2278168_c0_seq13	390.822	1.06196	0.229163	4.63411	3.5848e-06	8.19489e-05
comp2254007_c0_seq1	84.3565	-2.12948	0.459566	-4.63367	3.59234e-06	8.20714e-05
comp2260455_c0_seq4	38.0773	-1.90223	0.410537	-4.63351	3.59521e-06	8.20873e-05
comp2276070_c0_seq2	805.29	-1.76196	0.380302	-4.63306	3.60308e-06	8.22172e-05
comp2245343_c0_seq1	731.963	0.912471	0.196956	4.63288	3.60617e-06	8.2238e-05
gnl|Pdu_trscr_assembly_1|13757	354.92	1.20193	0.259475	4.63218	3.61841e-06	8.24674e-05
comp2268087_c0_seq17	187.543	1.38204	0.298388	4.6317	3.62675e-06	8.26076e-05
comp2279013_c0_seq1	510.333	1.75611	0.379181	4.63131	3.63356e-06	8.27128e-05
comp2254122_c0_seq2	2168.59	-1.0918	0.235757	-4.63103	3.63845e-06	8.27742e-05
comp2278375_c1_seq2	33.6273	1.92484	0.415722	4.63011	3.65466e-06	8.30929e-05
comp2242993_c0_seq2	537.294	-2.04849	0.442588	-4.62844	3.68422e-06	8.37144e-05
comp2262459_c0_seq3	20.0281	2.4536	0.530128	4.62832	3.68643e-06	8.37144e-05
comp2238602_c0_seq1	167.5	-2.25267	0.486807	-4.62745	3.70198e-06	8.40162e-05
comp2255327_c0_seq2	42.3211	1.95867	0.423284	4.62733	3.70417e-06	8.40162e-05
comp2273237_c0_seq1	57.2937	-1.56658	0.338857	-4.62314	3.7798e-06	8.568e-05
comp2274622_c1_seq1	19.3918	-2.58903	0.560124	-4.62224	3.79623e-06	8.60008e-05
comp2242590_c0_seq1	35.0445	2.23385	0.483303	4.62205	3.79967e-06	8.60271e-05
comp2264469_c0_seq6	59.3355	2.49923	0.540784	4.6215	3.80979e-06	8.62046e-05
comp2272910_c0_seq1	1364.58	-1.48649	0.321684	-4.62098	3.81936e-06	8.63694e-05
comp2269552_c0_seq1	2822.45	-1.55637	0.336881	-4.61994	3.83845e-06	8.6749e-05
comp2270471_c0_seq1	2569.76	-1.39147	0.301238	-4.61919	3.85243e-06	8.69423e-05
comp2271573_c0_seq1	159.142	1.4259	0.308696	4.61911	3.85392e-06	8.69423e-05
comp2272158_c0_seq2	316.961	-1.95039	0.42223	-4.61926	3.85109e-06	8.69423e-05
comp2268274_c0_seq2	516.989	-1.03746	0.224622	-4.61871	3.86134e-06	8.70577e-05
comp2269535_c0_seq6	326.596	-1.63694	0.354429	-4.61853	3.86475e-06	8.70827e-05
comp2200203_c0_seq1	74.0722	-2.09065	0.452707	-4.6181	3.87261e-06	8.71776e-05
comp2266899_c0_seq2	106.776	1.99336	0.431644	4.61805	3.87358e-06	8.71776e-05
comp2192120_c0_seq1	10.4524	-2.28105	0.494108	-4.61651	3.90254e-06	8.7777e-05
comp2276343_c0_seq1	1521.9	1.16641	0.25267	4.61636	3.9053e-06	8.77867e-05
comp2252950_c0_seq1	308.758	1.13421	0.245744	4.61542	3.92297e-06	8.81313e-05
comp2275341_c0_seq11	1627.95	1.13622	0.246193	4.61518	3.92746e-06	8.81798e-05
comp2277900_c0_seq1	33.5208	-2.06511	0.447747	-4.61222	3.98394e-06	8.93947e-05
comp2245787_c0_seq1	649.885	-1.36264	0.295482	-4.61159	3.99594e-06	8.96106e-05
comp2271259_c0_seq2	53.5908	1.90252	0.412619	4.61084	4.01046e-06	8.98829e-05
comp2266296_c0_seq3	393.826	-1.74819	0.379245	-4.60966	4.03332e-06	9.03415e-05
comp2256469_c0_seq1	27.1748	2.50155	0.54273	4.6092	4.0422e-06	9.04867e-05
comp2020617_c0_seq1	51.8833	2.01366	0.436897	4.60901	4.04584e-06	9.05146e-05
comp2266619_c0_seq2	52.5173	-2.11471	0.458835	-4.60886	4.0488e-06	9.0527e-05
comp2142853_c0_seq1	142.529	1.41404	0.306875	4.60786	4.06825e-06	9.09081e-05
comp2265482_c0_seq1	20.0004	2.44329	0.530324	4.60716	4.08215e-06	9.11647e-05
comp2251083_c0_seq1	279.882	1.44416	0.313578	4.60543	4.1161e-06	9.18144e-05
comp2277342_c0_seq2	751.995	-1.51059	0.327999	-4.60548	4.11516e-06	9.18144e-05
comp2262372_c0_seq1	117.674	1.39433	0.302927	4.60284	4.16769e-06	9.29102e-05
comp2200669_c0_seq1	40.2537	1.85365	0.402747	4.60252	4.17407e-06	9.29975e-05
comp2245955_c0_seq1	2534.3	1.35917	0.295344	4.60198	4.18485e-06	9.31828e-05
comp2267120_c1_seq7	75.5101	1.65492	0.359707	4.60075	4.20978e-06	9.36825e-05
comp2258030_c0_seq2	802.04	-0.998012	0.21694	-4.60041	4.21659e-06	9.37787e-05
comp2231993_c0_seq1	34.2622	2.2299	0.484834	4.5993	4.23904e-06	9.41672e-05
comp2264274_c0_seq1	273.086	-1.39851	0.304063	-4.5994	4.23706e-06	9.41672e-05
comp2276872_c0_seq8	331.229	-1.62927	0.354305	-4.5985	4.25539e-06	9.44748e-05
comp2278151_c1_seq3	149.611	-1.52451	0.331545	-4.59818	4.26202e-06	9.45662e-05
comp2263768_c0_seq2	2923.68	0.88047	0.191496	4.59784	4.26888e-06	9.46627e-05
comp2277062_c1_seq2	138.755	-2.5665	0.55832	-4.59684	4.28955e-06	9.50654e-05
comp2249336_c0_seq1	840.479	-1.93871	0.421828	-4.59597	4.30735e-06	9.54038e-05
comp2266634_c0_seq1	56.8806	2.36452	0.514802	4.59306	4.36791e-06	9.66884e-05
comp2266400_c0_seq3	476.883	1.26827	0.276177	4.59222	4.38557e-06	9.70223e-05
comp2272915_c1_seq7	272.404	1.03161	0.224787	4.58926	4.4482e-06	9.83503e-05
comp2261386_c0_seq1	505.936	-1.80029	0.392323	-4.58879	4.45826e-06	9.8515e-05
comp2257347_c0_seq1	143.707	1.42824	0.311444	4.58588	4.52078e-06	9.98382e-05
comp2277550_c1_seq6	159.517	-1.91057	0.416647	-4.58559	4.52704e-06	9.99178e-05
comp2238758_c0_seq1	73.4982	-2.96282	0.646192	-4.58505	4.53878e-06	0.000100118
comp2253520_c0_seq4	19.6352	-2.77587	0.605435	-4.58492	4.54152e-06	0.00010012
comp2278437_c0_seq1	570.313	1.40377	0.306213	4.5843	4.55506e-06	0.00010036
comp2268643_c0_seq1	57.4914	1.71354	0.373808	4.584	4.56158e-06	0.000100445
comp2267341_c0_seq1	2739.44	-1.27449	0.278232	-4.58068	4.63463e-06	0.000101994
comp2138236_c0_seq1	61.7529	2.09344	0.457062	4.5802	4.64528e-06	0.000102169
comp2274052_c0_seq1	801.025	-0.643295	0.140459	-4.57994	4.65101e-06	0.000102235
comp2263912_c0_seq4	31.1185	2.41869	0.528157	4.57949	4.66112e-06	0.000102398
comp2258192_c0_seq1	132.221	1.91898	0.419428	4.57522	4.75722e-06	0.000104449
comp2270798_c0_seq1	266.802	1.17201	0.256261	4.57353	4.79585e-06	0.000105235
comp2266747_c0_seq1	388.51	-1.96726	0.430172	-4.57319	4.80361e-06	0.000105344
comp2235205_c0_seq1	31.296	-1.88399	0.412095	-4.57173	4.83707e-06	0.000106017
comp2273494_c0_seq2	5091.6	-1.22649	0.268292	-4.57147	4.84304e-06	0.000106086
comp2266429_c0_seq6	479.134	-1.09211	0.238954	-4.5704	4.86798e-06	0.00010657
comp2249602_c0_seq3	95.1824	-2.33553	0.511115	-4.56949	4.88921e-06	0.000106973
comp2260528_c0_seq1	253.01	-1.96902	0.431045	-4.56802	4.92358e-06	0.000107538
comp2266781_c0_seq2	214.09	2.36116	0.516876	4.56814	4.92066e-06	0.000107538
comp2274467_c1_seq5	873.602	-1.76743	0.386914	-4.56803	4.92332e-06	0.000107538
comp2272717_c0_seq1	107.619	1.57995	0.345927	4.56728	4.94088e-06	0.000107853
comp2272747_c0_seq9	468.258	-1.19513	0.261701	-4.56678	4.95279e-06	0.000108051
comp2270855_c0_seq7	84.3571	-1.71473	0.375566	-4.56574	4.97743e-06	0.000108526
comp2239573_c0_seq1	69.4952	-2.27821	0.499047	-4.56513	4.99181e-06	0.000108651
comp2259382_c0_seq2	462.999	1.70195	0.372798	4.56534	4.98696e-06	0.000108651
comp2265988_c1_seq1	46.9263	2.3892	0.523348	4.56521	4.98984e-06	0.000108651
comp2250079_c0_seq2	1163.66	-2.07432	0.454448	-4.56449	5.00717e-06	0.000108922
comp2254278_c0_seq1	194.501	-1.88149	0.412254	-4.56391	5.02102e-06	0.000109098
comp2277763_c0_seq2	857.672	-1.74786	0.382972	-4.56395	5.01996e-06	0.000109098
comp2277697_c0_seq1	220.807	-2.30598	0.505278	-4.56377	5.0242e-06	0.000109104
comp2275543_c0_seq2	839.095	-1.59602	0.349754	-4.56325	5.03666e-06	0.000109312
comp2264493_c0_seq2	401.233	1.44716	0.317286	4.56106	5.0897e-06	0.000110302
comp2270984_c0_seq2	522.887	-1.81345	0.397591	-4.5611	5.08862e-06	0.000110302
comp2273149_c0_seq6	2045.69	-1.55256	0.340398	-4.561	5.09105e-06	0.000110302
comp2272661_c0_seq1	74.1808	1.23101	0.269917	4.5607	5.09837e-06	0.000110397
comp2266735_c0_seq5	296.814	1.68747	0.370035	4.56028	5.10846e-06	0.000110553
comp2229376_c0_seq1	10.054	-2.74906	0.602879	-4.55989	5.11801e-06	0.000110696
comp2260482_c0_seq1	1778.95	-1.94858	0.427394	-4.55921	5.13474e-06	0.000110994
comp2259334_c0_seq1	77.2737	1.57742	0.346012	4.55887	5.14294e-06	0.000111108
comp1193693_c0_seq1	35.0866	-1.50258	0.329612	-4.55863	5.14878e-06	0.00011117
comp2253278_c0_seq3	308.15	1.28664	0.282327	4.55728	5.18203e-06	0.000111824
comp2274399_c0_seq2	29.0013	1.8942	0.415831	4.55522	5.23307e-06	0.000112861
comp2256031_c0_seq1	51.597	2.7486	0.603522	4.55427	5.25676e-06	0.000113307
comp2251003_c0_seq1	10.7201	-2.36163	0.51858	-4.55404	5.26265e-06	0.000113369
comp2245767_c0_seq1	163.876	-2.27019	0.498747	-4.55179	5.31916e-06	0.000114521
comp2258892_c0_seq1	374.095	1.67083	0.367238	4.54972	5.3717e-06	0.000115521
comp2277266_c0_seq3	403.889	1.62819	0.357865	4.54973	5.37156e-06	0.000115521
comp2263264_c0_seq3	487.945	-1.37598	0.302487	-4.54888	5.39321e-06	0.000115917
comp2261201_c0_seq1	277.26	1.18316	0.260168	4.54769	5.42372e-06	0.000116507
comp2267483_c0_seq3	10141.7	0.986202	0.21689	4.54701	5.44122e-06	0.000116816
comp2261525_c1_seq8	67.1835	1.99878	0.43972	4.54557	5.47872e-06	0.000117554
comp2279235_c0_seq1	1072.5	1.85823	0.408927	4.54416	5.51556e-06	0.000118278
gnl|Pdu_trscr_assembly_1|9334	5209.1	1.48706	0.327319	4.54317	5.54149e-06	0.000118766
comp2281439_c0_seq1	728.515	-3.13917	0.691121	-4.54215	5.56837e-06	0.000119274
comp2268840_c0_seq5	606.846	-1.81358	0.399343	-4.54141	5.58796e-06	0.000119626
comp2264334_c0_seq1	542.843	-2.1888	0.482131	-4.53984	5.62971e-06	0.000120452
comp2239883_c0_seq1	23.5099	2.53111	0.557778	4.53784	5.68333e-06	0.000121482
comp2258329_c0_seq5	157.271	-2.27007	0.500271	-4.53769	5.6874e-06	0.000121482
comp2262185_c0_seq1	107.386	1.804	0.397559	4.53768	5.68755e-06	0.000121482
comp2246233_c0_seq2	615.252	1.68144	0.370563	4.53754	5.69135e-06	0.000121495
comp2269908_c0_seq1	131.177	-2.37397	0.523617	-4.53378	5.79366e-06	0.000123609
comp2251153_c0_seq2	155.736	-1.22995	0.271329	-4.53305	5.8137e-06	0.000123967
comp2267915_c0_seq1	770.455	-1.44359	0.318504	-4.53239	5.83212e-06	0.000124289
comp2214119_c0_seq1	196.696	1.34273	0.296461	4.5292	5.92071e-06	0.000126106
comp2246811_c0_seq5	144.792	-1.96101	0.433123	-4.5276	5.9657e-06	0.000126969
comp2275034_c0_seq1	9.96657	2.92256	0.645511	4.52752	5.96799e-06	0.000126969
comp2257867_c0_seq1	2439.63	-0.8037	0.177611	-4.52505	6.03798e-06	0.000128386
comp2265646_c0_seq2	357.999	-1.22036	0.269706	-4.5248	6.04536e-06	0.000128471
comp2258234_c0_seq1	65.9233	-1.63033	0.360364	-4.52413	6.06443e-06	0.000128803
comp2267789_c2_seq4	35.9441	1.89528	0.418979	4.52356	6.08088e-06	0.00012908
gnl|Pdu_trscr_assembly_1|334671	48.9648	-1.7799	0.393701	-4.52094	6.15668e-06	0.000130616
comp2273705_c0_seq7	152.27	-1.79509	0.397127	-4.5202	6.17809e-06	0.000130996
comp2266648_c0_seq2	55.3034	1.96763	0.435401	4.51913	6.20947e-06	0.000131588
comp2270506_c0_seq11	541.673	-2.083	0.46106	-4.51785	6.24696e-06	0.000132308
comp2265716_c1_seq1	23.6919	-1.89289	0.419105	-4.51651	6.28679e-06	0.000133077
comp2270079_c1_seq2	1706.84	-1.0884	0.240998	-4.51622	6.29522e-06	0.000133181
comp2264851_c0_seq2	103.096	-1.88466	0.417703	-4.51196	6.42306e-06	0.000135809
comp2255849_c0_seq3	19.5465	2.10977	0.467615	4.51175	6.42938e-06	0.000135867
comp2253637_c0_seq4	21.6813	-1.74048	0.385776	-4.51162	6.43342e-06	0.000135876
comp2277968_c0_seq7	166.94	-2.03828	0.451858	-4.51089	6.45563e-06	0.000136269
comp2270180_c0_seq1	303.358	-1.55915	0.34583	-4.50843	6.53103e-06	0.000137783
comp2275683_c1_seq1	163.97	-1.84892	0.410168	-4.50772	6.55283e-06	0.000138166
comp2276678_c0_seq7	2237.13	-1.36845	0.303685	-4.50614	6.60161e-06	0.000139117
comp2269859_c0_seq1	791.607	-1.96917	0.437102	-4.50505	6.6357e-06	0.000139757
comp2276017_c0_seq2	359.134	-1.83849	0.408136	-4.50461	6.64939e-06	0.000139967
comp2267886_c0_seq2	52.5589	2.01597	0.447579	4.50416	6.66352e-06	0.000140108
comp2271362_c1_seq1	298.157	-0.861598	0.191289	-4.50417	6.66319e-06	0.000140108
comp2278291_c1_seq3	417.499	-1.40667	0.312314	-4.50403	6.66758e-06	0.000140116
comp2239935_c0_seq1	5183.27	1.10429	0.245214	4.50335	6.68896e-06	0.000140342
comp2270545_c0_seq4	1103.86	-0.94036	0.208812	-4.50339	6.6878e-06	0.000140342
comp2278064_c0_seq3	547.653	-1.80319	0.400412	-4.50334	6.68949e-06	0.000140342
comp2274017_c0_seq3	597.314	1.64476	0.365464	4.50047	6.78038e-06	0.000142169
comp2252239_c0_seq1	2996.01	0.871595	0.193682	4.50013	6.79133e-06	0.00014232
comp2270930_c0_seq1	335.348	-1.61852	0.359749	-4.49901	6.82702e-06	0.000142989
comp2206928_c0_seq1	556.909	-1.54677	0.343903	-4.49768	6.87e-06	0.000143809
comp2272253_c0_seq1	176.941	1.10372	0.245446	4.49679	6.89878e-06	0.000144331
comp2253329_c0_seq1	175.431	2.14092	0.476153	4.49628	6.9153e-06	0.000144597
comp2265508_c0_seq15	491.206	1.18155	0.262802	4.49596	6.92571e-06	0.000144734
gnl|Pdu_trscr_assembly_1|7679	107.47	-2.26797	0.504609	-4.49451	6.97294e-06	0.000145641
comp2271511_c0_seq2	165.772	-2.18902	0.487249	-4.49261	7.03562e-06	0.000146869
comp2263727_c0_seq5	75.6354	-1.65537	0.368483	-4.4924	7.04239e-06	0.000146929
comp2259838_c0_seq2	271.15	-2.65051	0.590022	-4.49222	7.04836e-06	0.000146972
comp2143340_c0_seq1	712.444	1.5444	0.343804	4.49209	7.05264e-06	0.00014698
comp2267186_c0_seq2	651.863	1.06728	0.237623	4.49148	7.07288e-06	0.00014732
comp2277639_c2_seq2	4951.22	-1.65614	0.368778	-4.4909	7.09241e-06	0.000147646
gnl|Pdu_trscr_assembly_1|2990	541.193	-1.05294	0.2345	-4.49016	7.11685e-06	0.000147991
comp2258250_c0_seq1	53.4532	2.3881	0.531838	4.49028	7.11305e-06	0.000147991
comp2207063_c0_seq1	682.296	1.25282	0.279026	4.48998	7.12308e-06	0.000148039
comp2206658_c0_seq1	231.292	-0.970312	0.216121	-4.48967	7.13328e-06	0.00014817
gnl|Pdu_trscr_assembly_1|13594	108.358	1.66295	0.370698	4.48601	7.25698e-06	0.000150656
comp2277129_c2_seq1	804.358	-2.23646	0.498676	-4.4848	7.29814e-06	0.000151427
comp2254394_c0_seq2	20569.3	1.42484	0.317876	4.48238	7.38134e-06	0.000153047
comp2277887_c0_seq7	1908.12	-1.01198	0.225772	-4.4823	7.3843e-06	0.000153047
comp2251024_c0_seq1	624.83	2.08151	0.464432	4.48185	7.40005e-06	0.000153276
comp2269794_c1_seq8	93.1807	1.21153	0.270325	4.48175	7.4035e-06	0.000153276
comp2277976_c0_seq3	2764.05	-1.04389	0.232935	-4.48146	7.4135e-06	0.000153399
comp2268286_c1_seq1	259.899	-1.13841	0.254109	-4.48001	7.46412e-06	0.000154362
comp2269828_c0_seq1	85.022	-1.67504	0.374021	-4.47848	7.51774e-06	0.000155386
comp2250906_c0_seq2	18636.7	1.17684	0.262824	4.47766	7.54647e-06	0.000155894
comp1317356_c0_seq1	15.0815	-1.79189	0.40022	-4.47725	7.56119e-06	0.000156113
comp2265588_c0_seq1	65.7241	1.72493	0.385341	4.47637	7.59223e-06	0.000156668
comp2268417_c0_seq2	3103.18	2.06879	0.462209	4.47588	7.60968e-06	0.000156938
comp2273366_c1_seq2	366.881	-1.0228	0.228519	-4.47577	7.6136e-06	0.000156938
comp2263164_c0_seq1	15.5094	-2.46563	0.551066	-4.4743	7.66626e-06	0.000157937
comp2253231_c0_seq1	30.0409	2.48758	0.556038	4.47376	7.68568e-06	0.00015825
comp2261355_c0_seq1	832.837	1.53026	0.342107	4.47304	7.71136e-06	0.000158677
comp2261773_c0_seq2	191.009	-1.3665	0.305502	-4.47295	7.71479e-06	0.000158677
comp2246597_c0_seq1	13.7649	2.24537	0.502149	4.47153	7.76621e-06	0.000159647
comp2270119_c0_seq15	1179.56	1.83808	0.411229	4.46971	7.83251e-06	0.000160922
comp2252893_c0_seq1	50.4029	-2.20706	0.49385	-4.46909	7.85528e-06	0.000161303
comp2265239_c0_seq1	27.7028	2.10233	0.470438	4.46888	7.8629e-06	0.000161371
comp2267067_c0_seq8	1122.29	1.52813	0.341998	4.46824	7.88676e-06	0.000161773
comp2278017_c0_seq2	308.526	1.34064	0.300119	4.46701	7.932e-06	0.000162613
comp2266434_c0_seq2	187.229	-1.4547	0.325741	-4.46583	7.97598e-06	0.000163376
comp2270443_c0_seq7	218.644	1.96629	0.440303	4.46578	7.97791e-06	0.000163376
comp2255290_c0_seq3	29.1629	-1.96735	0.440594	-4.46522	7.99849e-06	0.000163709
comp2255408_c0_seq1	38.9591	-2.21737	0.496634	-4.4648	8.01446e-06	0.000163947
comp2277628_c0_seq10	184.967	-0.962058	0.215497	-4.46436	8.03067e-06	0.000164189
comp1194411_c0_seq1	276.835	1.8367	0.41151	4.46332	8.06978e-06	0.0001649
comp2276503_c0_seq4	73.6825	-1.91951	0.430111	-4.46282	8.08865e-06	0.000165196
comp2264106_c2_seq1	550.749	0.998524	0.223772	4.46223	8.11092e-06	0.000165561
comp2263631_c0_seq4	27.2232	-2.50438	0.561346	-4.46138	8.14346e-06	0.000166135
comp2203085_c0_seq1	124.052	-1.35156	0.302988	-4.46076	8.16677e-06	0.000166521
comp2220459_c0_seq1	40.4673	2.22438	0.498693	4.46041	8.18014e-06	0.000166703
comp2271539_c0_seq2	9304.63	-1.24441	0.279004	-4.46016	8.18979e-06	0.00016681
comp2273503_c0_seq2	54.7723	1.66793	0.374022	4.45944	8.21753e-06	0.000167285
comp2250635_c0_seq1	174.316	0.928028	0.208121	4.45909	8.23082e-06	0.000167465
comp2257618_c0_seq4	47.8658	2.29772	0.515502	4.45724	8.30204e-06	0.000168732
comp2279956_c0_seq1	399.35	1.69932	0.381242	4.45733	8.29854e-06	0.000168732
comp2272826_c0_seq18	1270.3	-1.69874	0.381132	-4.4571	8.30774e-06	0.000168757
comp2269394_c1_seq1	122.306	-1.51552	0.340137	-4.4556	8.36585e-06	0.000169846
comp2273024_c0_seq1	113.117	2.45244	0.550658	4.45365	8.44237e-06	0.000171307
comp2257131_c0_seq2	1185.46	-1.61665	0.363029	-4.45322	8.45937e-06	0.00017156
comp2266191_c3_seq1	89.6401	1.9621	0.440806	4.45117	8.54045e-06	0.000173019
comp2272236_c1_seq3	112.584	-1.3411	0.30129	-4.45121	8.5388e-06	0.000173019
comp2273079_c1_seq1	277.722	-1.40617	0.315961	-4.45046	8.56856e-06	0.000173495
comp2264592_c1_seq2	38.8762	1.88553	0.423699	4.45017	8.5801e-06	0.000173635
comp2276865_c0_seq4	365.675	-1.93946	0.435946	-4.44886	8.6329e-06	0.00017461
comp2209889_c0_seq4	208.076	-1.57681	0.35451	-4.44786	8.67289e-06	0.000175299
comp2278221_c0_seq3	407.506	-1.99949	0.449547	-4.44778	8.67625e-06	0.000175299
comp2267238_c0_seq3	373.471	-1.07576	0.241912	-4.4469	8.71191e-06	0.000175852
comp2270876_c0_seq2	1489.52	1.5254	0.343027	4.44687	8.71293e-06	0.000175852
comp2266519_c0_seq6	169.146	-1.75823	0.3954	-4.44672	8.71932e-06	0.000175887
comp2262629_c0_seq3	45.5152	-1.66088	0.373569	-4.44598	8.74916e-06	0.000176395
comp2275233_c0_seq4	175.838	1.16292	0.261605	4.44533	8.7756e-06	0.000176833
comp2264668_c0_seq1	76.1178	1.46889	0.330533	4.44401	8.82995e-06	0.000177833
comp2253814_c0_seq1	64.3452	2.39803	0.539664	4.44356	8.84821e-06	0.000178106
comp2264013_c0_seq1	951.322	-1.50532	0.339027	-4.44011	8.99111e-06	0.000180886
comp2222329_c0_seq1	12.7514	-2.1944	0.49434	-4.43905	9.03553e-06	0.000181683
comp2262999_c0_seq2	106.248	-1.36142	0.306703	-4.4389	9.04217e-06	0.00018172
comp2262945_c0_seq1	623.274	-1.459	0.328823	-4.43705	9.12013e-06	0.000183189
comp2261809_c0_seq1	136.685	1.45196	0.327272	4.43656	9.14066e-06	0.000183504
comp2257590_c0_seq3	135.934	-1.68153	0.379059	-4.43607	9.16148e-06	0.000183726
comp2260244_c0_seq1	83.756	1.40263	0.316183	4.43613	9.15885e-06	0.000183726
comp2277702_c0_seq4	173.975	-1.85033	0.417161	-4.43554	9.18418e-06	0.000184084
comp2232067_c0_seq2	126.002	-2.16202	0.487503	-4.43489	9.21204e-06	0.000184446
comp2275176_c2_seq4	127.168	-1.2876	0.290331	-4.43493	9.21005e-06	0.000184446
comp2279527_c0_seq1	409.503	-2.20783	0.497904	-4.43426	9.23896e-06	0.000184887
comp2268955_c0_seq1	291.299	1.31533	0.296779	4.43202	9.3353e-06	0.000186716
comp2275930_c1_seq1	115.466	1.8078	0.407939	4.43155	9.3557e-06	0.000187025
comp2259728_c0_seq2	46.5559	-1.5594	0.35201	-4.42999	9.42393e-06	0.000188289
comp1193932_c0_seq1	50.9231	-2.46608	0.556991	-4.4275	9.533e-06	0.000190367
comp2266617_c0_seq1	764.202	-2.16962	0.490102	-4.42689	9.56027e-06	0.000190735
comp2273479_c0_seq1	116.842	-1.36856	0.309149	-4.42686	9.56151e-06	0.000190735
comp2201767_c0_seq1	85.8335	2.20851	0.49906	4.42533	9.62933e-06	0.000191986
comp2279856_c0_seq1	90.8879	2.08086	0.470228	4.42521	9.63492e-06	0.000191996
comp2259339_c1_seq2	24.3464	2.00369	0.452809	4.42503	9.6428e-06	0.000192052
comp2254575_c0_seq1	317.65	-1.36506	0.308548	-4.42413	9.68313e-06	0.000192754
comp2263573_c0_seq1	109.915	-1.94562	0.439838	-4.4235	9.71138e-06	0.000193112
comp2270227_c0_seq1	949.208	1.47136	0.332624	4.4235	9.71137e-06	0.000193112
comp2236509_c0_seq6	557.607	1.22486	0.276989	4.42204	9.77737e-06	0.000194322
comp2259995_c0_seq1	28.1092	-1.61639	0.36578	-4.41901	9.91545e-06	0.000196859
comp2270217_c0_seq2	1000.25	-1.08352	0.245191	-4.41908	9.9123e-06	0.000196859
comp2268078_c0_seq2	989.004	1.04901	0.237394	4.41887	9.92165e-06	0.000196879
comp2247387_c0_seq3	37.6726	1.91622	0.433697	4.41833	9.94684e-06	0.000197275
comp2271361_c0_seq4	213.984	-1.58843	0.359538	-4.41797	9.96343e-06	0.0001975
comp2261674_c0_seq1	961.904	0.954867	0.216201	4.41656	1.00282e-05	0.00019868
comp2207445_c0_seq1	22.5343	2.17925	0.493471	4.41616	1.00468e-05	0.000198943
comp2259006_c0_seq2	434.623	1.46258	0.331268	4.41511	1.00959e-05	0.000199811
comp2256629_c0_seq1	197.188	-1.03893	0.235445	-4.41263	1.02122e-05	0.000201901
comp2267969_c0_seq2	36.1765	-2.29561	0.520234	-4.41266	1.02109e-05	0.000201901
comp1194215_c0_seq1	176.595	1.73758	0.393804	4.4123	1.0228e-05	0.000202106
comp2267716_c0_seq2	1003.76	-2.06216	0.467388	-4.41209	1.02377e-05	0.000202194
comp2266869_c0_seq1	559.134	1.95269	0.442609	4.41177	1.02531e-05	0.000202391
comp2271031_c0_seq6	74.8268	-2.21817	0.503111	-4.40891	1.03891e-05	0.000204969
comp2275955_c0_seq3	233.141	0.97829	0.22192	4.40831	1.04183e-05	0.000205437
comp2266644_c0_seq1	177.983	1.19741	0.271693	4.40721	1.04713e-05	0.000206375
comp2224269_c0_seq1	47.2665	-1.89033	0.429048	-4.40588	1.05357e-05	0.000207535
comp2266857_c0_seq1	317.97	1.05275	0.238961	4.40555	1.05513e-05	0.000207735
comp2273832_c0_seq3	835.239	-1.02437	0.232538	-4.40518	1.05697e-05	0.000207989
comp2273319_c0_seq3	54.5354	1.74854	0.396979	4.40461	1.05973e-05	0.000208422
gnl|Pdu_trscr_assembly_1|11033	946.243	0.925793	0.210204	4.40426	1.06147e-05	0.000208657
comp2261259_c0_seq1	31.4153	-1.93542	0.43963	-4.4024	1.07061e-05	0.000210344
comp2252310_c0_seq2	43.6139	-2.11873	0.481352	-4.40163	1.07443e-05	0.000210984
comp2228256_c0_seq1	261.893	1.25821	0.2859	4.40088	1.07813e-05	0.000211601
comp2257529_c0_seq1	4694.09	1.15298	0.262033	4.40012	1.08192e-05	0.000212234
comp2256152_c0_seq2	34.71	1.70628	0.387799	4.39992	1.08291e-05	0.000212318
comp2267797_c1_seq1	136.356	1.74041	0.395596	4.39945	1.08524e-05	0.000212664
comp2255351_c1_seq2	23.8799	-1.83942	0.418209	-4.39833	1.09087e-05	0.000213546
comp2274552_c0_seq10	901.849	-1.69299	0.384909	-4.39841	1.09049e-05	0.000213546
comp2221749_c0_seq2	338.853	-0.777969	0.176898	-4.39784	1.09332e-05	0.000213845
comp2246565_c0_seq1	75.6659	1.71436	0.389821	4.3978	1.09353e-05	0.000213845
comp2254266_c0_seq1	27.2793	-1.79406	0.408005	-4.39714	1.09687e-05	0.000214388
comp2139116_c0_seq1	102.413	1.0955	0.249224	4.39566	1.10439e-05	0.000215633
comp2247067_c0_seq1	9.18893	2.59277	0.589841	4.39571	1.10411e-05	0.000215633
comp2140683_c0_seq1	726.058	2.18983	0.498219	4.39532	1.10608e-05	0.000215852
comp2230509_c0_seq2	1434.39	-1.08924	0.247849	-4.39478	1.10883e-05	0.000216276
comp1315948_c0_seq1	455.884	-2.33084	0.530443	-4.39414	1.11211e-05	0.000216804
comp1981028_c0_seq1	107.068	1.83201	0.416937	4.39399	1.11291e-05	0.000216848
comp2277018_c0_seq3	80.1703	-1.9313	0.439553	-4.39377	1.114e-05	0.000216948
comp2271029_c0_seq1	1135.74	1.45557	0.331351	4.39285	1.11876e-05	0.000217763
comp2269510_c0_seq1	82.8779	-2.05701	0.468343	-4.39209	1.12266e-05	0.00021841
comp2248738_c0_seq1	148.37	-1.23051	0.280299	-4.39	1.1335e-05	0.000220404
comp2273199_c0_seq1	27.6052	-1.64521	0.374827	-4.38925	1.13742e-05	0.000221053
comp2254176_c0_seq1	125.523	1.41025	0.321331	4.38878	1.13989e-05	0.000221418
comp2264151_c0_seq2	64.9613	-1.86984	0.426067	-4.38861	1.14078e-05	0.000221478
comp2277823_c0_seq14	771.016	-0.887199	0.202184	-4.38808	1.14354e-05	0.000221901
comp2266919_c0_seq1	512.124	-0.876567	0.199848	-4.38617	1.15361e-05	0.000223739
comp2262891_c0_seq3	30.7923	2.13566	0.487142	4.38406	1.16488e-05	0.000225809
comp2242464_c0_seq3	49.4404	-1.22737	0.280118	-4.38161	1.17804e-05	0.000228243
comp2280496_c0_seq1	219.83	1.50421	0.343346	4.38102	1.18126e-05	0.000228748
comp2241420_c0_seq2	13.18	-2.29423	0.523777	-4.38016	1.18594e-05	0.000229537
comp2253827_c0_seq3	17.566	-2.45826	0.561505	-4.37799	1.19781e-05	0.000231716
comp2272362_c3_seq1	51.6165	1.64992	0.376889	4.37775	1.19911e-05	0.000231849
comp2244978_c1_seq1	59.8776	1.49	0.340369	4.3776	1.19994e-05	0.00023189
comp2278988_c0_seq1	88.8157	1.41543	0.323571	4.3744	1.2177e-05	0.000235201
comp2276183_c0_seq5	462.919	1.26999	0.290332	4.37426	1.21847e-05	0.00023523
comp1953996_c0_seq1	349.172	1.29878	0.296945	4.37382	1.2209e-05	0.000235579
comp2259570_c0_seq1	218.557	1.73944	0.397705	4.37369	1.22166e-05	0.000235606
comp2140238_c0_seq1	1524.65	-1.08004	0.246987	-4.37288	1.22619e-05	0.000236358
comp2253390_c0_seq2	36.4668	1.95903	0.448102	4.37184	1.23202e-05	0.00023736
comp2258986_c0_seq1	13.8783	-1.86737	0.427196	-4.37122	1.23553e-05	0.000237915
comp2254420_c0_seq1	1222.65	-1.43875	0.329183	-4.37068	1.23861e-05	0.000238266
comp2265950_c0_seq7	41.7109	2.35332	0.538423	4.37077	1.23808e-05	0.000238266
comp2271721_c0_seq2	44.2393	-1.6215	0.371106	-4.36937	1.24607e-05	0.000239578
comp2275684_c0_seq21	207.74	1.29258	0.296044	4.36617	1.26443e-05	0.000242983
comp2256979_c0_seq1	28.0061	1.9461	0.445764	4.36576	1.26684e-05	0.000243324
comp2277309_c0_seq6	1214.75	-1.41114	0.323263	-4.36529	1.26953e-05	0.000243716
comp2263531_c0_seq1	271.597	-1.55153	0.355459	-4.36487	1.27199e-05	0.000244064
comp2274903_c0_seq2	118.787	1.88618	0.432183	4.36432	1.27521e-05	0.000244557
comp2246361_c0_seq1	378.66	1.92742	0.441651	4.36413	1.27628e-05	0.000244638
comp2264578_c0_seq2	577.785	-1.53154	0.351201	-4.36086	1.29553e-05	0.000248202
comp2262567_c0_seq4	39.2342	1.85742	0.426207	4.35801	1.3125e-05	0.000251325
comp2242712_c0_seq1	11.2389	-2.68292	0.615776	-4.35698	1.31872e-05	0.000252388
comp2264956_c0_seq1	288.485	1.61389	0.370473	4.3563	1.32279e-05	0.00025304
comp2266543_c0_seq1	141.137	-1.24402	0.285576	-4.35616	1.32365e-05	0.000253076
comp2228128_c0_seq1	47.013	1.72238	0.395414	4.3559	1.32519e-05	0.000253114
comp2276609_c1_seq2	91.9272	2.08028	0.477569	4.35597	1.32476e-05	0.000253114
comp2253333_c0_seq2	16.6881	2.30348	0.528913	4.35512	1.32996e-05	0.000253897
comp2231285_c0_seq1	25.0949	2.38791	0.548336	4.35483	1.33169e-05	0.000254098
comp2276654_c0_seq2	1079.03	-1.78437	0.409803	-4.35422	1.33544e-05	0.000254685
gnl|Pdu_trscr_assembly_1|4340	230.417	-1.45919	0.335222	-4.3529	1.34348e-05	0.000256088
comp2244128_c0_seq1	138.378	-1.32171	0.303658	-4.35263	1.34515e-05	0.000256279
comp2271115_c0_seq1	636.113	-1.76048	0.404524	-4.35198	1.34911e-05	0.000256903
comp2269823_c0_seq1	128.092	-1.74762	0.40159	-4.35176	1.35048e-05	0.000257035
comp2246889_c0_seq8	6720.95	-1.02117	0.23469	-4.35112	1.35441e-05	0.000257652
comp2249177_c0_seq1	433.205	-1.71867	0.395064	-4.35037	1.3591e-05	0.000258413
comp2275847_c0_seq1	9740.08	-1.16727	0.268327	-4.35019	1.36017e-05	0.000258488
comp2278157_c1_seq1	211.381	-1.08436	0.249293	-4.34975	1.36293e-05	0.000258881
comp2276056_c2_seq5	77.6034	-1.46859	0.337679	-4.34907	1.36715e-05	0.000259553
comp2278135_c0_seq10	2940.98	1.01751	0.234011	4.34812	1.37307e-05	0.000260545
gnl|Pdu_trscr_assembly_1|93741	12.8207	2.51493	0.578584	4.3467	1.38202e-05	0.000262112
comp2142425_c0_seq1	125.861	-2.43072	0.559301	-4.346	1.38645e-05	0.00026282
comp2244088_c0_seq2	50.1081	1.61669	0.372015	4.34577	1.38785e-05	0.000262953
comp2265661_c0_seq2	523.475	-1.06363	0.244825	-4.34446	1.39619e-05	0.000264401
comp2269637_c0_seq4	84.0189	2.37644	0.547086	4.34382	1.40027e-05	0.00026504
comp2273729_c0_seq3	80.9411	-2.13455	0.491629	-4.34178	1.41332e-05	0.000267376
comp2272792_c0_seq1	1310.66	1.77505	0.408848	4.34159	1.41458e-05	0.000267481
comp2250260_c0_seq1	1115.04	1.10094	0.253646	4.34045	1.42193e-05	0.000268629
comp2274497_c0_seq1	200.575	1.73165	0.398958	4.34042	1.42208e-05	0.000268629
comp2254003_c0_seq1	97.945	-2.13534	0.492356	-4.33698	1.44455e-05	0.0002726
[truncated: 5,923 more rows]

## Sheet: PM_NM_Female vs M_NM_Female
	baseMean	log2FoldChange	lfcSE	stat	pvalue	padj
comp2257567_c0_seq1	2601.19	-7.3148	0.337205	-21.6925	2.4172e-104	1.05806e-99
comp2269662_c0_seq8	18757.1	-7.46391	0.347155	-21.5002	1.54871e-102	3.38952e-98
comp2261851_c1_seq1	1383.24	6.36919	0.379677	16.7753	3.70184e-63	5.40123e-59
comp2265263_c0_seq1	3439.88	-6.78505	0.407973	-16.6311	4.14727e-62	4.53836e-58
comp2234324_c0_seq2	4423.94	-9.37137	0.572657	-16.3647	3.41524e-60	2.98984e-56
comp2254792_c1_seq4	10946.5	-8.73676	0.552366	-15.817	2.37638e-56	1.73365e-52
comp2256337_c0_seq2	359.485	-6.12773	0.390729	-15.6828	1.98217e-55	1.23948e-51
comp2223254_c0_seq1	1776.33	-8.50795	0.55126	-15.4337	9.72129e-54	5.31901e-50
comp1193006_c0_seq1	80.4783	-8.16305	0.546188	-14.9455	1.66662e-50	8.10571e-47
comp2224089_c0_seq1	660.552	-5.19372	0.348277	-14.9126	2.72798e-50	1.16333e-46
comp2258675_c0_seq3	527.406	-4.96952	0.333346	-14.908	2.92346e-50	1.16333e-46
comp2265326_c0_seq3	5903.1	6.41524	0.434392	14.7683	2.34473e-49	8.55279e-46
comp2236959_c0_seq1	1122.83	-5.87834	0.408985	-14.373	7.64622e-47	2.57454e-43
comp2272108_c0_seq1	2995.14	-4.90614	0.342396	-14.3288	1.4453e-46	4.51883e-43
comp2262279_c0_seq1	11965.3	-8.07489	0.578979	-13.9468	3.29104e-44	9.60369e-41
comp2215885_c0_seq1	296.876	-7.70092	0.555482	-13.8635	1.05441e-43	2.8846e-40
comp2272093_c0_seq1	1250.48	4.52335	0.327096	13.8288	1.70837e-43	4.39875e-40
comp2275713_c0_seq3	26150.7	-5.36247	0.388538	-13.8017	2.49011e-43	6.0554e-40
comp2261608_c0_seq1	3608.59	-7.06776	0.524982	-13.4629	2.58711e-41	5.96015e-38
comp2271537_c0_seq19	1250.25	-3.80968	0.289018	-13.1815	1.12151e-39	2.45453e-36
comp2257715_c1_seq3	2503.48	-4.36671	0.333387	-13.098	3.37899e-39	7.04309e-36
comp2240916_c0_seq1	1065.28	5.23429	0.402631	13.0002	1.21973e-38	2.42681e-35
comp2262443_c0_seq1	4613.05	-4.67226	0.360023	-12.9777	1.6373e-38	3.11599e-35
gnl|Pdu_trscr_assembly_1|1218	398.855	-2.91091	0.224629	-12.9587	2.09763e-38	3.82572e-35
comp2272119_c0_seq6	321.046	-4.45189	0.343816	-12.9485	2.39707e-38	4.19699e-35
comp2242933_c0_seq1	26670.4	-5.37227	0.415134	-12.941	2.64042e-38	4.44525e-35
comp2205302_c0_seq1	523.253	-4.27578	0.330904	-12.9215	3.40531e-38	5.49126e-35
comp2265751_c0_seq4	462.568	-5.29497	0.409857	-12.9191	3.51264e-38	5.49126e-35
comp2250225_c0_seq2	4722.82	-5.06639	0.394976	-12.8271	1.15619e-37	1.74513e-34
comp2266373_c0_seq1	161.065	-4.28416	0.336104	-12.7465	3.25918e-37	4.75536e-34
comp2209056_c0_seq1	404.939	-8.00588	0.628249	-12.7432	3.40271e-37	4.80463e-34
comp2252195_c0_seq1	638.469	-6.29826	0.497028	-12.6718	8.46966e-37	1.15854e-33
comp2253801_c0_seq1	484.526	-5.54997	0.440544	-12.598	2.16586e-36	2.87285e-33
comp2254414_c0_seq1	440.354	-2.97516	0.238715	-12.4632	1.18478e-35	1.5253e-32
comp2256943_c0_seq2	58.1874	-5.74353	0.462832	-12.4095	2.32003e-35	2.9015e-32
comp2256041_c0_seq1	33311.8	-3.16492	0.257047	-12.3126	7.74872e-35	9.42158e-32
comp2277335_c1_seq5	725.924	-3.5295	0.289273	-12.2013	3.06015e-34	3.62024e-31
comp2221300_c0_seq1	154.58	-4.57022	0.375496	-12.1712	4.42728e-34	5.09976e-31
comp2271249_c0_seq23	1879.11	-5.70278	0.469588	-12.1442	6.15775e-34	6.91121e-31
comp2270003_c1_seq1	142.269	-5.05729	0.419874	-12.0448	2.06632e-33	2.26117e-30
comp2253014_c0_seq2	7025.59	-1.78757	0.150506	-11.877	1.55812e-32	1.66347e-29
comp2232271_c0_seq1	221.162	-5.4809	0.461755	-11.8697	1.70032e-32	1.77206e-29
comp2272370_c0_seq4	521.22	-3.27325	0.276236	-11.8494	2.1661e-32	2.20499e-29
comp2273366_c2_seq1	239.526	-4.35842	0.369936	-11.7815	4.8603e-32	4.83512e-29
comp2238682_c0_seq2	241.692	-6.47352	0.555055	-11.6629	1.97322e-31	1.91938e-28
comp2278332_c0_seq1	745.933	4.09409	0.351805	11.6374	2.6606e-31	2.53174e-28
comp2272343_c0_seq3	910.497	4.99028	0.433277	11.5175	1.07629e-30	1.00237e-27
comp2280841_c0_seq1	431.088	-5.8788	0.511555	-11.492	1.44669e-30	1.31926e-27
comp2261980_c0_seq3	6477.25	5.32888	0.464323	11.4767	1.72782e-30	1.54347e-27
comp2281046_c0_seq1	263.147	5.55407	0.490544	11.3223	1.01799e-29	8.91189e-27
isotig10568	3256.76	5.44822	0.481544	11.3141	1.11796e-29	9.59521e-27
comp2274137_c0_seq1	4991.52	4.60667	0.408144	11.2869	1.52372e-29	1.28262e-26
comp2277995_c0_seq1	6385.78	3.46493	0.311238	11.1327	8.69255e-29	7.17906e-26
comp2271713_c0_seq1	2437.78	5.04582	0.454439	11.1034	1.20748e-28	9.78773e-26
comp2241134_c0_seq1	974.418	3.10897	0.280308	11.0913	1.38333e-28	1.10093e-25
gnl|Pdu_trscr_assembly_1|12794	12373.2	2.74727	0.249343	11.018	3.12852e-28	2.44539e-25
comp2276838_c1_seq1	1601.1	2.19578	0.199338	11.0153	3.22288e-28	2.47494e-25
comp2229575_c0_seq1	1319.3	1.72068	0.157358	10.9348	7.85525e-28	5.92827e-25
comp2253317_c0_seq1	1161.86	-3.32746	0.305068	-10.9073	1.06407e-27	7.89429e-25
comp2236889_c0_seq1	96.7218	-4.06326	0.374928	-10.8374	2.28847e-27	1.66952e-24
comp2276244_c0_seq1	2015.38	3.31538	0.306126	10.8301	2.47848e-27	1.77849e-24
comp2261876_c0_seq1	1236.94	3.68505	0.340448	10.8241	2.64615e-27	1.86818e-24
comp2251620_c0_seq1	5987.92	3.61412	0.334321	10.8104	3.07472e-27	2.13629e-24
comp2273601_c1_seq1	263.573	-3.84453	0.356166	-10.7942	3.66662e-27	2.50774e-24
comp2280824_c0_seq1	1593.78	-3.55846	0.330519	-10.7663	4.9662e-27	3.34431e-24
comp2264636_c0_seq1	925.109	2.07501	0.193037	10.7493	5.97058e-27	3.95976e-24
comp2260095_c1_seq1	100.225	-4.67436	0.435935	-10.7226	7.97082e-27	5.20744e-24
comp2257070_c0_seq2	279584	2.90172	0.272316	10.6557	1.64014e-26	1.05577e-23
comp2244589_c0_seq2	6458.2	-4.88723	0.459522	-10.6355	2.03816e-26	1.29296e-23
comp2268819_c2_seq1	1085.9	-5.35081	0.505329	-10.5888	3.35948e-26	2.10073e-23
comp2274804_c0_seq1	1309.41	3.42216	0.324272	10.5534	4.90085e-26	3.02141e-23
comp2239858_c0_seq1	1186.69	-4.56817	0.433659	-10.534	6.02198e-26	3.66103e-23
comp2253407_c0_seq3	13532.6	4.88746	0.464354	10.5253	6.60576e-26	3.92036e-23
comp2270003_c0_seq1	308.474	-5.15577	0.489861	-10.525	6.62767e-26	3.92036e-23
comp2254641_c1_seq1	806.385	4.4541	0.423675	10.513	7.52444e-26	4.39146e-23
comp2270871_c0_seq1	678.919	4.86331	0.463771	10.4864	9.97248e-26	5.74362e-23
comp2268625_c0_seq3	293.752	3.45509	0.330061	10.468	1.21149e-25	6.88694e-23
comp2277462_c0_seq1	115.415	4.83234	0.462926	10.4387	1.65091e-25	9.26455e-23
comp2256206_c0_seq2	22.6185	-5.86898	0.565797	-10.3729	3.29232e-25	1.8242e-22
comp1192611_c0_seq1	411.044	-3.80984	0.367732	-10.3604	3.75466e-25	2.04695e-22
comp2276073_c0_seq1	181.606	-4.72868	0.456457	-10.3595	3.78787e-25	2.04695e-22
comp2269108_c0_seq5	88.62	-3.07107	0.296628	-10.3532	4.04559e-25	2.15955e-22
comp2260003_c0_seq1	148.637	-4.58514	0.443162	-10.3464	4.34373e-25	2.29077e-22
comp2272698_c0_seq4	4611.09	-2.71337	0.264888	-10.2435	1.26612e-24	6.59769e-22
comp2235052_c0_seq1	502.802	-5.79018	0.567334	-10.2059	1.86495e-24	9.49215e-22
comp2267304_c0_seq3	1248.01	-3.79546	0.371858	-10.2067	1.84963e-24	9.49215e-22
comp2252193_c0_seq2	552.782	4.47871	0.439784	10.1839	2.34028e-24	1.17746e-21
comp2269374_c0_seq3	6336.03	2.45035	0.240648	10.1823	2.37862e-24	1.18315e-21
comp2263706_c0_seq2	71.4057	-4.53613	0.445997	-10.1708	2.67825e-24	1.31722e-21
comp2266348_c1_seq2	1401.96	-3.17894	0.312804	-10.1627	2.90874e-24	1.41468e-21
comp2278464_c0_seq2	6608.78	3.02805	0.299278	10.1178	4.60428e-24	2.21471e-21
comp2261193_c1_seq4	83.1194	-4.45865	0.44436	-10.0339	1.08207e-23	5.1483e-21
comp2282195_c0_seq2	4525.83	-3.43361	0.342768	-10.0173	1.27938e-23	6.02163e-21
comp2259403_c0_seq2	494.958	4.49561	0.45044	9.9805	1.85534e-23	8.54864e-21
comp2276174_c0_seq14	706.843	-3.11484	0.312077	-9.981	1.84597e-23	8.54864e-21
gnl|Pdu_trscr_assembly_1|88882	255.379	-4.36222	0.442124	-9.86652	5.81493e-23	2.65137e-20
comp2259241_c0_seq1	102.199	-3.84183	0.38996	-9.85186	6.7286e-23	3.03633e-20
comp2262537_c0_seq3	64.9692	-5.22608	0.532615	-9.81212	9.98454e-23	4.45963e-20
comp2264786_c0_seq1	363.582	-3.34657	0.341468	-9.80054	1.11981e-22	4.95116e-20
comp2274374_c0_seq4	720.195	3.83537	0.393045	9.75809	1.70334e-22	7.45584e-20
comp1194608_c0_seq1	1093.33	-3.42302	0.350996	-9.7523	1.80342e-22	7.73914e-20
comp2264911_c0_seq3	429.71	-5.48784	0.562703	-9.75265	1.79721e-22	7.73914e-20
comp2261415_c0_seq1	190.883	-3.19995	0.328209	-9.74972	1.84987e-22	7.8614e-20
comp2266185_c0_seq3	207.184	-5.01333	0.516095	-9.71398	2.62877e-22	1.10641e-19
comp2251338_c0_seq8	151.069	4.0417	0.416543	9.70295	2.92894e-22	1.221e-19
comp2229342_c0_seq1	17.1852	-4.8626	0.501312	-9.69974	3.02275e-22	1.24822e-19
comp2239531_c0_seq1	565.635	-3.47109	0.35848	-9.6828	3.56802e-22	1.45962e-19
comp2221142_c0_seq1	2871.61	4.44261	0.459721	9.66372	4.29974e-22	1.74267e-19
comp2278392_c0_seq1	1817.81	-3.2996	0.341714	-9.65604	4.6342e-22	1.86099e-19
comp2141958_c0_seq2	127.122	-6.45889	0.670098	-9.63872	5.48663e-22	2.18328e-19
comp2263873_c0_seq9	1607.79	4.15696	0.431861	9.6257	6.22829e-22	2.45608e-19
comp2276461_c0_seq7	521.785	4.02354	0.418233	9.62033	6.56189e-22	2.56453e-19
comp2238985_c0_seq1	219.958	4.59968	0.47919	9.59888	8.08197e-22	3.13065e-19
comp2263124_c0_seq2	2096.14	-4.16125	0.434706	-9.57256	1.04294e-21	4.00451e-19
comp2275616_c0_seq2	759.464	3.52386	0.368308	9.56768	1.09331e-21	4.15165e-19
comp2276073_c1_seq1	583.658	-4.44058	0.464154	-9.56703	1.10023e-21	4.15165e-19
comp2255923_c0_seq3	535.151	-4.36141	0.456676	-9.55035	1.29262e-21	4.83594e-19
comp2262305_c0_seq1	4994.17	2.55752	0.267994	9.54319	1.38503e-21	5.13775e-19
comp2272814_c1_seq2	2673.53	-3.36278	0.352892	-9.52919	1.58515e-21	5.83069e-19
comp2273459_c1_seq1	174.928	-3.8422	0.404297	-9.50341	2.03132e-21	7.40959e-19
comp2261379_c0_seq1	100876	3.06246	0.322289	9.5022	2.05508e-21	7.43429e-19
comp2273152_c0_seq2	1460.17	-2.3716	0.250044	-9.48472	2.43033e-21	8.7197e-19
comp2259858_c0_seq2	81.2028	-5.22217	0.551146	-9.47512	2.6646e-21	9.48251e-19
comp2277610_c1_seq3	1815.36	-2.92718	0.309288	-9.46424	2.95717e-21	1.04388e-18
comp2266735_c0_seq5	296.814	3.76075	0.397413	9.46306	2.99058e-21	1.04723e-18
comp2277104_c0_seq3	2529.52	3.26498	0.345196	9.45835	3.12848e-21	1.08682e-18
comp2250283_c0_seq1	33.6963	-5.94022	0.629218	-9.44064	3.705e-21	1.27697e-18
comp2254406_c0_seq1	155.286	3.73302	0.39577	9.43229	4.0123e-21	1.37208e-18
gnl|Pdu_trscr_assembly_1|7284	321.158	-4.55609	0.484135	-9.41078	4.92455e-21	1.67099e-18
comp2202652_c0_seq2	424.192	-4.07418	0.434366	-9.3796	6.62237e-21	2.2298e-18
comp2272828_c0_seq8	945.451	-3.0034	0.320752	-9.36363	7.70437e-21	2.57432e-18
comp2259749_c0_seq5	128.986	3.37819	0.361239	9.35166	8.62822e-21	2.84445e-18
comp2270387_c0_seq54	1285.89	-2.16266	0.231263	-9.35148	8.64278e-21	2.84445e-18
comp2278475_c0_seq14	3679.02	-1.84019	0.196886	-9.34646	9.06306e-21	2.96051e-18
comp2272379_c0_seq9	3099.63	-3.75361	0.402637	-9.32258	1.13549e-20	3.68167e-18
comp2266075_c0_seq5	546.07	-4.11013	0.44095	-9.32108	1.15158e-20	3.7064e-18
comp2263738_c0_seq2	1015.53	-1.66456	0.178967	-9.30089	1.39277e-20	4.44996e-18
comp2264193_c0_seq2	120.313	-5.33823	0.575803	-9.27094	1.84507e-20	5.85236e-18
comp2268687_c0_seq1	3902.01	-4.65881	0.504371	-9.23686	2.53828e-20	7.99322e-18
comp2265937_c0_seq5	1694.53	2.64305	0.286355	9.23	2.7063e-20	8.44904e-18
comp2266841_c0_seq1	444.864	4.57938	0.496173	9.2294	2.72164e-20	8.44904e-18
comp2267077_c0_seq2	749.137	2.95383	0.320299	9.22208	2.91381e-20	8.85719e-18
comp2267655_c0_seq21	7639.54	-3.60074	0.390445	-9.22214	2.91221e-20	8.85719e-18
comp2273249_c0_seq4	7052.16	4.49757	0.487648	9.22298	2.88969e-20	8.85719e-18
comp2275024_c0_seq2	204.505	2.76319	0.299756	9.21811	3.02382e-20	9.12818e-18
comp2273726_c1_seq7	831.231	2.43058	0.265095	9.16872	4.78673e-20	1.4351e-17
comp2273540_c0_seq2	791.425	2.63875	0.288732	9.13907	6.29909e-20	1.87567e-17
comp2262714_c0_seq1	256.086	-3.81063	0.416995	-9.13832	6.34296e-20	1.87597e-17
comp2271417_c0_seq5	283.879	-2.69344	0.294979	-9.13097	6.78876e-20	1.98105e-17
comp2275310_c0_seq1	1222.01	-3.45758	0.378647	-9.13139	6.76244e-20	1.98105e-17
gnl|Pdu_trscr_assembly_1|212085	35.0339	-4.68964	0.513852	-9.12644	7.07876e-20	2.052e-17
comp2269234_c0_seq4	193.379	3.51505	0.38544	9.11957	7.54231e-20	2.17199e-17
comp2261061_c0_seq1	124.017	-3.54172	0.390339	-9.07345	1.15308e-19	3.29886e-17
comp2274563_c1_seq9	767.181	-2.48132	0.274556	-9.03756	1.60201e-19	4.55345e-17
comp2259529_c0_seq1	2072.67	3.42222	0.37981	9.01035	2.05404e-19	5.80059e-17
comp2272553_c0_seq5	855.956	2.90736	0.323017	9.00065	2.24387e-19	6.29608e-17
comp2273791_c0_seq4	870.576	-3.75025	0.417292	-8.9871	2.53844e-19	7.07723e-17
comp2259786_c0_seq4	354.07	3.37911	0.377841	8.94319	3.78078e-19	1.04742e-16
comp2278592_c0_seq3	399.739	2.45006	0.27406	8.93985	3.8971e-19	1.07286e-16
comp2259832_c0_seq2	1444.44	-3.06251	0.343984	-8.90307	5.43224e-19	1.48613e-16
comp2267060_c0_seq1	256.715	3.53359	0.397172	8.89689	5.74344e-19	1.5615e-16
comp2262932_c1_seq1	165.524	2.59199	0.291672	8.88666	6.29725e-19	1.69458e-16
comp2263229_c0_seq2	396.771	4.31832	0.485946	8.88643	6.31034e-19	1.69458e-16
comp2270224_c0_seq1	356.399	2.1139	0.238477	8.86416	7.7082e-19	2.05734e-16
comp2277584_c0_seq5	872.307	-3.29447	0.372175	-8.85195	8.60047e-19	2.28158e-16
comp2254431_c0_seq4	116.789	-2.14745	0.242841	-8.84301	9.31724e-19	2.45683e-16
comp2269247_c0_seq1	4332.18	-2.73956	0.310069	-8.83533	9.98026e-19	2.61419e-16
comp2274959_c0_seq5	4452.81	-2.80395	0.317378	-8.83474	1.00334e-18	2.61419e-16
comp2275350_c0_seq1	1873.65	-2.1466	0.243237	-8.82512	1.09341e-18	2.83201e-16
comp2264517_c0_seq6	207.841	-2.69118	0.305138	-8.81956	1.14914e-18	2.95884e-16
comp2271992_c0_seq4	393.888	-4.38612	0.497588	-8.81477	1.19931e-18	3.06996e-16
comp2271848_c0_seq8	1027.16	3.20252	0.363586	8.80816	1.27217e-18	3.23753e-16
comp2265840_c0_seq3	144.804	-4.13693	0.469817	-8.80542	1.30367e-18	3.29351e-16
comp2270061_c0_seq1	148.841	-4.20457	0.477524	-8.80494	1.30922e-18	3.29351e-16
comp2247098_c0_seq1	732.576	4.39553	0.499269	8.80394	1.32091e-18	3.30395e-16
comp2270281_c0_seq1	142.63	3.09742	0.351858	8.80304	1.33159e-18	3.31172e-16
comp2275893_c0_seq1	9017.89	4.42915	0.503498	8.79676	1.40825e-18	3.47464e-16
comp2278539_c0_seq2	52782.1	2.2831	0.25955	8.79638	1.41297e-18	3.47464e-16
comp2251993_c0_seq1	260.244	4.19846	0.477802	8.78704	1.53551e-18	3.75489e-16
comp2259852_c1_seq1	621.099	-2.95541	0.336732	-8.77675	1.6826e-18	4.09171e-16
comp2275743_c0_seq2	3431.66	-2.54358	0.289838	-8.77586	1.69602e-18	4.10155e-16
comp2219247_c0_seq1	98.6642	-4.0714	0.464324	-8.76845	1.81136e-18	4.35643e-16
comp2265255_c2_seq1	28601.3	4.41803	0.506202	8.72779	2.59687e-18	6.21148e-16
comp2263067_c0_seq4	4733.34	3.115	0.3576	8.71085	3.01595e-18	7.17468e-16
comp1927618_c0_seq1	325.28	-3.23627	0.372211	-8.69473	3.4767e-18	8.22607e-16
comp2257660_c0_seq2	103.515	4.33049	0.499026	8.67788	4.03212e-18	9.48893e-16
comp2254367_c0_seq1	565.227	2.37045	0.273435	8.66914	4.35414e-18	1.01919e-15
comp2258284_c0_seq4	522.953	4.19144	0.484213	8.65619	4.87782e-18	1.1357e-15
comp2260860_c0_seq2	853.806	2.96241	0.3423	8.65443	4.95385e-18	1.1473e-15
comp2252381_c0_seq5	166.717	3.71921	0.42991	8.65112	5.09957e-18	1.17483e-15
comp2272075_c0_seq4	206.989	-3.99321	0.463438	-8.61649	6.90384e-18	1.58217e-15
comp2269751_c0_seq2	280.657	-3.0337	0.35233	-8.61038	7.28159e-18	1.66005e-15
comp2245053_c0_seq1	141.305	4.13597	0.480667	8.60465	7.65479e-18	1.73609e-15
comp2257854_c0_seq3	573.113	2.88741	0.335931	8.59524	8.30898e-18	1.87475e-15
comp2279764_c0_seq1	2282.62	2.18794	0.254723	8.58948	8.73628e-18	1.96105e-15
comp2254377_c0_seq1	56.0199	-4.98075	0.579968	-8.58798	8.8511e-18	1.97669e-15
comp2261795_c0_seq1	185.922	3.08559	0.36019	8.56655	1.06629e-17	2.36923e-15
gnl|Pdu_trscr_assembly_1|1213	28496.3	-3.34325	0.39065	-8.55818	1.14661e-17	2.53482e-15
comp2274031_c0_seq3	685.11	2.29001	0.26777	8.55216	1.20803e-17	2.65718e-15
comp2276390_c2_seq3	2706.74	-2.35984	0.276246	-8.54255	1.31293e-17	2.87347e-15
comp2275646_c0_seq3	512.31	1.95692	0.229126	8.54081	1.33284e-17	2.90255e-15
comp2276498_c2_seq1	281.354	4.27721	0.501166	8.53452	1.40744e-17	3.04982e-15
comp2273202_c0_seq1	49.6311	-4.17166	0.491179	-8.49316	2.01098e-17	4.33619e-15
comp2232817_c0_seq2	580.956	-3.77012	0.444815	-8.4757	2.33661e-17	5.01363e-15
comp2267067_c0_seq8	1122.29	2.98924	0.353313	8.46061	2.6599e-17	5.67947e-15
comp2259310_c0_seq2	31.6767	-5.10617	0.604123	-8.45219	2.85883e-17	6.0746e-15
comp2271756_c0_seq2	1767.85	-4.21064	0.498335	-8.4494	2.92796e-17	6.19143e-15
comp2278279_c1_seq4	6265.16	-3.00367	0.356185	-8.43291	3.3718e-17	7.0957e-15
comp2261881_c0_seq2	360.629	2.03424	0.24173	8.41534	3.91769e-17	8.20503e-15
comp2254647_c0_seq2	1603.63	-2.50207	0.297689	-8.40498	4.27949e-17	8.9201e-15
comp2197826_c0_seq1	214.776	-3.04592	0.362479	-8.40303	4.35116e-17	9.02649e-15
comp2250762_c0_seq1	302.849	4.4352	0.527871	8.40205	4.38748e-17	9.0589e-15
gnl|Pdu_trscr_assembly_1|20388	2090.52	3.60233	0.428872	8.39954	4.48242e-17	9.21147e-15
comp2264626_c0_seq3	278.162	-1.81662	0.216514	-8.3903	4.84918e-17	9.91862e-15
comp2267875_c0_seq5	1551.16	-2.05958	0.246071	-8.36986	5.76868e-17	1.17445e-14
comp2274336_c0_seq18	54.7311	-3.34362	0.400131	-8.35632	6.47038e-17	1.30517e-14
comp2277776_c0_seq1	1674.08	-3.30807	0.395868	-8.3565	6.4607e-17	1.30517e-14
comp2278436_c0_seq3	2988.98	2.06892	0.247741	8.35112	6.76175e-17	1.35769e-14
comp2139590_c0_seq1	549.332	-2.74148	0.328516	-8.34504	7.11922e-17	1.42293e-14
comp2273340_c1_seq1	667.198	2.49682	0.299307	8.34202	7.30337e-17	1.4531e-14
comp2273978_c0_seq1	1675.33	-3.12675	0.374898	-8.34027	7.41199e-17	1.46804e-14
comp2232850_c0_seq1	15.9158	-4.87437	0.585047	-8.33159	7.97636e-17	1.57271e-14
comp2271380_c0_seq2	173.732	-2.5249	0.303212	-8.32718	8.27926e-17	1.62511e-14
comp2138076_c0_seq1	607.959	-3.59556	0.432249	-8.31826	8.92621e-17	1.74428e-14
comp2258227_c1_seq1	129.083	3.73487	0.449562	8.3078	9.74937e-17	1.89666e-14
comp2254530_c0_seq1	1063.19	3.77711	0.455397	8.29411	1.09401e-16	2.11889e-14
comp2276257_c0_seq6	560.819	-2.23453	0.269538	-8.29024	1.13018e-16	2.17931e-14
comp2277987_c1_seq1	3211.14	-3.01593	0.364343	-8.27771	1.25571e-16	2.41074e-14
comp2279956_c0_seq1	399.35	3.3935	0.410394	8.26888	1.35224e-16	2.58472e-14
comp2272472_c0_seq5	258.045	-2.56824	0.310672	-8.26673	1.37679e-16	2.62021e-14
comp2239040_c0_seq1	116.282	3.1179	0.377264	8.2645	1.4028e-16	2.65815e-14
gnl|Pdu_trscr_assembly_1|264488	18.1138	-4.25529	0.51533	-8.25741	1.48868e-16	2.80872e-14
comp2255868_c0_seq1	95.3363	-3.10869	0.376647	-8.25359	1.53709e-16	2.88761e-14
comp2243368_c0_seq4	440.433	3.29695	0.399777	8.24696	1.62468e-16	3.03912e-14
comp2138995_c0_seq1	215.305	-3.58398	0.435231	-8.23465	1.80082e-16	3.35428e-14
comp2265919_c1_seq23	1826.74	3.52983	0.428759	8.23266	1.83107e-16	3.39616e-14
comp2278536_c1_seq38	16022.8	2.5989	0.315737	8.23121	1.85334e-16	3.42297e-14
comp2251791_c0_seq2	430.434	3.93923	0.479644	8.21282	2.16046e-16	3.97342e-14
comp2240347_c0_seq3	188.427	-3.78777	0.461356	-8.21009	2.21031e-16	4.0481e-14
[truncated: 10,489 more rows]

## Sheet: PM_NM_Male vs M_NM_Male
	baseMean	log2FoldChange	lfcSE	stat	pvalue	padj
[truncated: 8,969 more rows]

[truncated: 8 more sheets: IM_FRFM vs PM_FRFM_Female, IM_FRFM vs PM_FRFM_Male, PM_NM_Female vs PM_NM_Male, M_NM_Female vs M_NM_Male, PM_FRFM_Female vs PM_FRFM_Male, IM_FRFM vs IM_NM, PM_FRFM_Female vs PM_NM_Female, PM_FRFM_Male vs PM_NM_Male]
