# Supplementary material for: Combined transcriptome and proteome profiling reveals specific molecular brain signatures for sex, maturation and circalunar clock phase
Source: eLife. 2019 Feb 15;8:e41556. doi: 10.7554/eLife.41556 (PMC6377233; doi:10.7554/eLife.41556)
Supplement: Figure 3—source data 5. — File containing EdgeR predicted DETs for all 14 comparision made. Each comparison is contained within a separate tab. [file elife-41556-fig3-data5.xlsx]

## Sheet: IM_NM vs PM_NM_Female
	logFC	logCPM	LR	PValue	FDR
comp2274374_c0_seq4	4.52444	4.35839	90.2201	2.13087e-21	1.10931e-16
comp2247380_c0_seq1	4.84541	1.60651	52.3832	4.56611e-13	1.18854e-08
comp2269871_c0_seq1	6.47861	5.507	50.4168	1.24323e-12	2.15737e-08
comp2273016_c0_seq4	6.15572	6.97819	48.8741	2.72927e-12	3.55207e-08
comp2259130_c0_seq2	4.87209	-0.289259	42.4648	7.19645e-11	7.4928e-07
comp2272964_c0_seq1	3.26941	2.15787	38.3912	5.78921e-10	5.02301e-06
comp2267127_c0_seq1	3.10827	3.37038	37.9685	7.18961e-10	5.34692e-06
comp2267260_c0_seq1	2.74027	3.89249	36.7646	1.33288e-09	8.67357e-06
comp2226460_c0_seq1	5.8736	3.24001	34.8996	3.47149e-09	2.00803e-05
comp2277164_c0_seq2	2.71733	4.23172	34.6	4.04904e-09	2.10789e-05
comp2278332_c0_seq1	2.01026	4.40038	31.9425	1.58805e-08	7.4328e-05
comp2252042_c0_seq1	2.19751	1.90216	31.795	1.71332e-08	7.4328e-05
comp2259229_c0_seq1	3.65337	2.10117	31.1897	2.3401e-08	9.37103e-05
comp2279899_c0_seq1	4.68673	-0.950314	30.0622	4.184e-08	0.0001507
comp2276586_c0_seq3	3.64609	2.82559	29.9903	4.34219e-08	0.0001507
comp2258476_c0_seq2	3.68646	-0.0824465	29.6551	5.16175e-08	0.000167947
comp2263164_c1_seq3	2.78026	1.4941	29.3724	5.97229e-08	0.000182889
comp2261851_c1_seq1	1.91555	5.29074	29.2055	6.50936e-08	0.000188262
comp2246635_c0_seq1	2.67616	1.9533	29.0487	7.05799e-08	0.000193385
comp2239753_c0_seq1	3.63382	1.08483	28.5613	9.07804e-08	0.000236297
comp2236094_c0_seq1	2.63716	1.40501	27.838	1.31907e-07	0.000326998
comp2269413_c0_seq1	2.14299	3.90918	27.4034	1.65137e-07	0.000390767
comp2258284_c0_seq4	2.69547	3.90309	27.084	1.94802e-07	0.000440921
comp2276498_c0_seq1	2.74192	4.48746	26.8458	2.20357e-07	0.000477982
comp2255776_c1_seq1	3.63961	-0.513251	26.2466	3.00483e-07	0.000625713
comp2276181_c0_seq4	1.94295	2.6859	25.6173	4.16296e-07	0.000833536
comp2273034_c0_seq1	2.24491	2.23786	25.4325	4.58128e-07	0.000883322
comp2265751_c0_seq4	2.63672	3.4265	25.1286	5.36318e-07	0.000928854
comp2274631_c0_seq3	2.49779	1.91075	25.1204	5.3861e-07	0.000928854
comp2274713_c1_seq7	2.30815	5.11347	25.079	5.50287e-07	0.000928854
comp2269080_c0_seq1	2.92312	1.27669	25.0691	5.53112e-07	0.000928854
comp2277499_c0_seq2	1.77639	5.59319	24.1433	8.94269e-07	0.00141839
comp2279447_c0_seq1	4.31731	1.03312	24.1329	8.99109e-07	0.00141839
comp2276498_c2_seq1	2.55438	3.02858	23.4553	1.27847e-06	0.00195753
comp2267586_c4_seq1	-2.86399	-0.438626	23.3339	1.36181e-06	0.00200462
comp2257660_c0_seq2	2.22043	1.63987	23.2997	1.38624e-06	0.00200462
comp2262931_c0_seq2	5.60727	4.04173	23.0794	1.55448e-06	0.00218716
comp2268991_c0_seq1	4.03697	-1.06705	22.9028	1.70401e-06	0.00233445
comp2277462_c0_seq1	1.9077	1.7942	22.663	1.93047e-06	0.00257687
comp2276855_c0_seq1	1.58109	3.11411	22.4604	2.14522e-06	0.00275047
comp2276636_c0_seq3	1.80152	3.50047	22.4417	2.16618e-06	0.00275047
comp2257701_c0_seq1	2.0886	1.64116	22.0351	2.67714e-06	0.00331832
comp2275532_c0_seq1	2.09388	2.71642	21.7215	3.1524e-06	0.00381653
comp2267060_c0_seq1	1.89267	2.88976	21.3399	3.8465e-06	0.00455102
comp2254419_c0_seq1	1.52445	4.02025	21.2225	4.08937e-06	0.00473086
comp2254542_c0_seq1	3.24603	5.21993	21.1354	4.27954e-06	0.00484323
comp2267687_c0_seq2	2.07257	1.06235	21.0509	4.4724e-06	0.0049538
comp2251605_c0_seq1	2.61427	4.29658	20.9627	4.68316e-06	0.00507918
comp2276461_c0_seq7	1.92799	3.89542	20.9001	4.83868e-06	0.00514076
comp2274934_c0_seq9	1.53806	6.71185	20.7453	5.24598e-06	0.00546201
comp2259529_c0_seq1	1.78194	5.86214	20.6694	5.45802e-06	0.00555789
comp2278107_c0_seq27	1.67719	3.85557	20.6369	5.55159e-06	0.00555789
comp2236190_c0_seq1	3.46552	-0.64607	20.5905	5.6878e-06	0.00558681
comp2256595_c0_seq1	3.068	0.31879	20.4056	6.26465e-06	0.00603947
comp2221142_c0_seq1	2.31097	6.34025	20.211	6.93513e-06	0.00656429
comp2235779_c0_seq1	2.77072	0.985364	20.152	7.15258e-06	0.00664922
comp2244049_c0_seq3	3.89081	-0.608599	20.0361	7.59931e-06	0.00694057
comp2263067_c0_seq4	1.77068	7.04781	19.9209	8.07114e-06	0.00724441
comp2262619_c1_seq2	1.86712	3.14844	19.8854	8.22262e-06	0.00725528
comp2259749_c0_seq5	1.57738	1.92226	19.8381	8.42861e-06	0.00731308
comp2274999_c0_seq4	2.10814	6.73371	19.6075	9.50969e-06	0.0080367
comp2133746_c1_seq1	3.3997	-1.28522	19.5951	9.57136e-06	0.0080367
comp1935108_c0_seq1	1.58646	2.70103	19.5104	1.00055e-05	0.00826784
comp2265663_c1_seq31	1.67952	6.66044	19.2717	1.13375e-05	0.00922217
comp2265878_c0_seq2	1.8628	2.9003	19.1934	1.18121e-05	0.00946042
comp2250456_c0_seq1	3.48619	-0.268635	18.9401	1.34886e-05	0.0106394
comp2268249_c0_seq4	-2.44859	1.44894	18.8675	1.40118e-05	0.0108756
comp2252193_c0_seq2	1.90897	3.97713	18.8413	1.42058e-05	0.0108756
comp2269996_c0_seq1	1.99637	2.48648	18.6576	1.56419e-05	0.0116575
comp2276667_c0_seq4	1.49945	2.82143	18.6536	1.5675e-05	0.0116575
comp2142040_c0_seq1	3.04789	2.03938	18.5491	1.65583e-05	0.012141
comp2236689_c0_seq1	2.61539	-0.238635	18.4571	1.73777e-05	0.0125648
comp2245335_c0_seq1	2.89124	1.26265	18.3507	1.83749e-05	0.0127853
comp2271544_c0_seq1	1.70163	2.97219	18.3447	1.84328e-05	0.0127853
comp2258861_c0_seq2	3.00386	1.683	18.3127	1.87453e-05	0.0127853
comp2261689_c0_seq1	2.00662	2.53376	18.3009	1.88616e-05	0.0127853
comp2244052_c0_seq1	4.73594	-2.13766	18.296	1.89106e-05	0.0127853
comp2267132_c0_seq2	2.09408	1.0727	18.2496	1.93769e-05	0.0129326
comp2037149_c0_seq1	2.33801	4.89475	18.1809	2.00884e-05	0.0132377
comp2262137_c0_seq3	-2.03468	4.38057	18.0717	2.12737e-05	0.0137216
comp2279863_c0_seq1	3.86998	-2.43012	18.0649	2.13498e-05	0.0137216
comp2260220_c0_seq4	-2.69712	-0.495776	17.9757	2.23745e-05	0.0138297
gnl|Pdu_trscr_assembly_1|263843	2.04125	2.34619	17.9737	2.23984e-05	0.0138297
comp2244553_c1_seq1	2.68764	3.80906	17.9731	2.24054e-05	0.0138297
comp2264311_c1_seq1	2.17375	2.401	17.9582	2.25807e-05	0.0138297
comp2276498_c1_seq1	2.5129	2.50181	17.9347	2.28616e-05	0.013839
comp2265661_c0_seq2	1.31584	3.82625	17.908	2.31839e-05	0.0138727
comp2270119_c0_seq15	1.86654	5.05787	17.7578	2.50883e-05	0.0148417
comp2248673_c0_seq2	-3.74242	-2.42546	17.7256	2.5517e-05	0.0148819
comp2271881_c0_seq1	2.30529	0.948349	17.7099	2.57279e-05	0.0148819
comp2266374_c0_seq1	2.21928	2.8915	17.5975	2.72943e-05	0.0156144
comp2262943_c0_seq1	3.32268	-1.93474	17.5376	2.81679e-05	0.0159391
comp2256237_c0_seq1	2.75122	2.41508	17.4922	2.88487e-05	0.0160338
comp2267765_c0_seq1	2.04286	5.99369	17.4786	2.90555e-05	0.0160338
comp2265327_c0_seq1	2.0876	1.14264	17.4653	2.92593e-05	0.0160338
comp2269532_c0_seq13	2.65305	6.68294	17.3669	3.08144e-05	0.0167101
comp2258100_c0_seq2	2.87084	0.234329	17.3104	3.17452e-05	0.0170374
comp2277150_c1_seq4	1.80005	5.65797	17.2769	3.23084e-05	0.0170561
comp2231262_c0_seq2	2.04064	0.347592	17.2695	3.24353e-05	0.0170561
comp2138099_c0_seq1	2.06662	3.66855	17.2062	3.35348e-05	0.0174364
comp2272507_c0_seq3	2.22248	3.98686	17.1896	3.38284e-05	0.0174364
comp2279369_c0_seq1	3.03233	-0.294988	17.1351	3.48137e-05	0.017696
comp2199649_c0_seq2	2.16258	2.06481	17.1243	3.5012e-05	0.017696
comp2252994_c0_seq2	2.30582	0.41016	17.1058	3.53535e-05	0.0176968
comp2264027_c0_seq3	1.89868	4.59381	17.0793	3.58515e-05	0.0177752
comp2273455_c0_seq2	1.29889	4.27756	16.9635	3.81062e-05	0.0187148
comp2260026_c0_seq1	2.43196	0.638689	16.9119	3.91556e-05	0.0190505
comp2274603_c0_seq1	1.80191	4.25742	16.8461	4.05369e-05	0.0195399
comp2276667_c1_seq1	2.04242	0.982464	16.775	4.20845e-05	0.0200998
comp2065624_c0_seq3	2.73571	4.32153	16.7413	4.28385e-05	0.0202739
comp2251281_c0_seq2	3.34668	-1.63487	16.6029	4.60808e-05	0.0216119
comp2198403_c0_seq2	1.64729	1.6985	16.5772	4.67086e-05	0.0217107
comp2259397_c0_seq12	2.19285	-0.593451	16.5474	4.7449e-05	0.0217552
comp2241498_c0_seq2	2.37849	1.95871	16.5398	4.764e-05	0.0217552
comp2254460_c0_seq1	2.22694	0.106075	16.4309	5.04567e-05	0.0228411
comp2268292_c0_seq2	2.35956	2.52561	16.3892	5.15795e-05	0.0231481
comp2257264_c1_seq1	1.67137	3.95052	16.2974	5.41384e-05	0.0238013
comp2272093_c0_seq1	1.29595	5.13846	16.288	5.44063e-05	0.0238013
comp2268784_c1_seq20	1.43042	7.60281	16.2776	5.47061e-05	0.0238013
comp2274417_c0_seq2	1.74045	5.62188	16.2722	5.48639e-05	0.0238013
comp2276603_c2_seq11	2.04413	6.09124	16.2242	5.62695e-05	0.0242094
comp2257559_c1_seq2	2.28266	1.32639	16.1671	5.7992e-05	0.024746
comp2249986_c0_seq5	-5.81449	-3.60187	16.1359	5.89546e-05	0.0249522
gnl|Pdu_trscr_assembly_1|335847	1.75316	2.26666	16.0355	6.21671e-05	0.0260997
comp2273207_c0_seq5	1.5641	4.49653	15.9762	6.41422e-05	0.0267134
comp2251338_c0_seq8	1.55884	2.15876	15.9609	6.46648e-05	0.0267174
comp2269593_c0_seq3	1.50064	4.52974	15.9065	6.655e-05	0.0271233
comp2261576_c0_seq2	1.81685	6.71914	15.8984	6.68337e-05	0.0271233
comp2272774_c0_seq2	1.99744	1.11973	15.8878	6.72104e-05	0.0271233
comp2275820_c0_seq6	1.25686	4.77794	15.8395	6.89465e-05	0.0273434
comp2268904_c0_seq2	2.00747	1.80309	15.8356	6.90917e-05	0.0273434
comp2266735_c0_seq5	1.59304	3.09679	15.8198	6.9669e-05	0.0273434
comp2221747_c1_seq1	3.38682	-1.2031	15.8147	6.98568e-05	0.0273434
comp2261362_c0_seq2	1.85631	4.89245	15.7697	7.15389e-05	0.0277125
comp2216329_c0_seq2	-3.48555	-2.35103	15.7611	7.18643e-05	0.0277125
comp2244379_c0_seq1	3.9502	-1.62984	15.627	7.71453e-05	0.0295302
comp1902522_c0_seq1	-4.91298	-3.76646	15.5988	7.83027e-05	0.029667
comp2252294_c0_seq3	3.233	-2.63422	15.5907	7.86423e-05	0.029667
comp2265229_c0_seq2	2.05991	3.49607	15.5112	8.20171e-05	0.0307175
comp2268857_c0_seq2	2.18419	6.47262	15.4851	8.31563e-05	0.0307335
comp2229224_c0_seq1	-2.06034	-0.159187	15.4735	8.36719e-05	0.0307335
comp2267040_c0_seq2	2.2429	3.62475	15.4699	8.38309e-05	0.0307335
comp1769718_c0_seq1	1.83748	4.97044	15.4234	8.59186e-05	0.0310293
comp1195281_c0_seq2	1.7937	0.200031	15.4104	8.65096e-05	0.0310293
comp2265351_c0_seq1	1.56016	3.01283	15.401	8.6944e-05	0.0310293
gnl|Pdu_trscr_assembly_1|1043	1.504	4.78825	15.3993	8.70221e-05	0.0310293
comp2267155_c0_seq2	1.39228	4.18674	15.2715	9.31091e-05	0.0329385
comp2275975_c0_seq1	1.76755	2.37245	15.2507	9.41438e-05	0.0329385
comp1194334_c0_seq1	1.39219	5.31606	15.2476	9.4297e-05	0.0329385
comp2867815_c0_seq1	-5.76746	-3.49049	15.2348	9.49402e-05	0.0329385
comp2274900_c0_seq10	1.51365	3.56881	15.2105	9.61672e-05	0.0329385
comp2267637_c2_seq1	-5.61424	-2.7341	15.2104	9.61726e-05	0.0329385
comp2099002_c0_seq1	-4.54227	-4.07839	15.1887	9.72844e-05	0.0331015
comp2271448_c1_seq3	1.74185	2.84516	15.1722	9.81397e-05	0.0331757
comp2254650_c0_seq2	3.97759	1.98848	15.061	0.00010409	0.03496
comp2247744_c0_seq2	-1.45265	2.77222	15.0276	0.00010595	0.0353568
comp2269459_c0_seq2	1.72984	4.19088	15.0114	0.000106864	0.0354346
comp1194173_c0_seq1	3.61195	-1.86852	14.9791	0.000108707	0.035802
comp2251960_c0_seq1	-2.53425	-0.435886	14.957	0.00010999	0.035802
comp2139301_c0_seq1	3.37882	-0.940091	14.9562	0.000110035	0.035802
comp2266186_c0_seq8	1.74624	3.00286	14.8791	0.000114629	0.037065
comp2277832_c2_seq4	1.60073	1.94539	14.8371	0.000117204	0.0376638
comp2254913_c0_seq2	2.38723	-0.101293	14.7949	0.000119862	0.0381762
comp2214237_c0_seq1	1.88762	1.92528	14.7885	0.000120265	0.0381762
comp2268268_c1_seq1	-3.59487	-0.379798	14.7332	0.000123846	0.0390747
comp2266589_c0_seq3	1.58328	4.50409	14.6594	0.000128792	0.0400605
comp2259598_c0_seq4	3.61318	-2.31257	14.6577	0.00012891	0.0400605
comp2263011_c0_seq1	1.71688	6.78343	14.6523	0.00012928	0.0400605
comp2262980_c0_seq1	2.24014	3.34923	14.5954	0.000133238	0.0410429
comp2257559_c0_seq1	2.38796	-0.216367	14.5604	0.000135735	0.0413711
comp2231698_c1_seq1	-3.90013	-3.71378	14.5502	0.000136475	0.0413711
comp2235059_c0_seq1	-4.68143	-3.06026	14.5443	0.000136906	0.0413711
comp2232487_c0_seq1	-3.46275	-3.60663	14.5363	0.000137482	0.0413711
comp2254641_c1_seq1	1.60312	4.51679	14.4931	0.000140677	0.0420892
comp2229321_c0_seq1	-4.09449	-3.74057	14.4257	0.000145796	0.0432588
comp2272039_c0_seq1	1.55383	3.68096	14.4199	0.000146248	0.0432588
comp2198096_c0_seq2	-4.03924	-3.54446	14.4046	0.000147445	0.0433663
comp2275560_c0_seq10	1.28517	2.77531	14.2764	0.000157829	0.0461597
comp2273312_c0_seq15	1.56623	1.94372	14.2085	0.000163634	0.04759
comp2274429_c0_seq1	1.52398	5.84461	14.1371	0.000169961	0.0489003
comp2195212_c0_seq1	2.5067	0.210791	14.1278	0.000170798	0.0489003
comp2240664_c0_seq1	1.98109	3.27743	14.1261	0.000170957	0.0489003
comp2185796_c0_seq1	4.929	-2.31865	14.0591	0.000177153	0.0503958
comp2263897_c0_seq7	-2.82546	3.55342	14.01	0.000181841	0.0514481
comp1194364_c0_seq1	-1.77032	5.56024	13.9743	0.000185327	0.052151
comp2269443_c0_seq1	2.91445	-1.74311	13.9546	0.000187276	0.0524161
comp2258896_c0_seq1	3.63528	-1.88561	13.9427	0.000188467	0.0524675
comp2262017_c0_seq2	1.59015	2.65603	13.9283	0.000189913	0.0525888
comp2258178_c0_seq3	2.37491	1.32782	13.9033	0.000192463	0.0527984
comp2245403_c1_seq1	-3.63661	-2.92757	13.901	0.000192699	0.0527984
comp2259573_c0_seq1	-2.12834	3.56244	13.8333	0.000199766	0.0544483
comp2204510_c0_seq1	2.32656	1.74669	13.8195	0.000201242	0.0545649
comp2266834_c0_seq1	2.45053	1.57899	13.7905	0.000204363	0.0549519
comp2235159_c0_seq1	-3.73675	-2.79179	13.7867	0.000204781	0.0549519
comp2276902_c0_seq7	1.43638	2.72416	13.7653	0.00020713	0.0552974
comp2262142_c0_seq2	2.08546	5.51128	13.7283	0.000211246	0.0557843
comp2232772_c0_seq2	-3.79457	-3.77566	13.7173	0.000212491	0.0557843
gnl|Pdu_trscr_assembly_1|14372	1.7728	2.52448	13.7093	0.00021339	0.0557843
comp2274415_c0_seq2	1.31901	3.46324	13.7036	0.000214045	0.0557843
comp2267488_c0_seq1	3.41914	-2.0796	13.6924	0.000215326	0.0557843
comp2257713_c0_seq1	1.30899	2.90962	13.6919	0.000215383	0.0557843
comp2271575_c0_seq13	1.48461	4.39165	13.6671	0.00021824	0.0561806
comp2266233_c0_seq1	2.63252	6.90234	13.6533	0.000219849	0.0561806
comp2254544_c0_seq2	2.17931	1.41622	13.6475	0.000220538	0.0561806
comp2255351_c1_seq2	1.85052	-0.562694	13.633	0.000222249	0.0561806
comp2269775_c0_seq5	2.2599	-0.0586025	13.6325	0.000222309	0.0561806
comp2272842_c1_seq2	1.62296	5.05409	13.594	0.000226904	0.0570648
comp2254348_c0_seq1	1.75193	1.11018	13.5701	0.000229816	0.0574113
comp2219057_c1_seq1	-4.64296	-3.86081	13.5537	0.000231828	0.0574113
comp2276997_c1_seq12	1.94402	5.86995	13.5535	0.000231859	0.0574113
comp2261589_c0_seq1	1.804	0.183394	13.5346	0.000234208	0.0574113
comp2221095_c0_seq1	2.24745	4.01834	13.5304	0.000234725	0.0574113
comp2258619_c0_seq2	1.65195	5.03466	13.5134	0.000236862	0.0574113
comp2271527_c3_seq2	1.8683	3.57165	13.5114	0.000237113	0.0574113
comp2252728_c0_seq3	2.04659	2.56721	13.5093	0.000237384	0.0574113
comp2195994_c0_seq1	2.22538	1.25853	13.5028	0.000238207	0.0574113
comp2266044_c0_seq2	2.11413	3.1606	13.4697	0.000242446	0.0581635
comp2216604_c0_seq2	-3.86052	-0.944646	13.4476	0.000245322	0.0585835
comp2240351_c0_seq2	1.56992	2.92642	13.4085	0.000250491	0.0590037
comp2277510_c2_seq1	1.72414	4.8256	13.4018	0.000251386	0.0590037
comp2228189_c0_seq2	2.46919	-1.44819	13.3844	0.000253728	0.0590037
comp2254643_c0_seq2	1.45144	9.61038	13.3797	0.000254357	0.0590037
comp2200363_c0_seq1	-5.20669	-3.94713	13.3772	0.000254697	0.0590037
comp1975390_c0_seq1	1.55088	2.78196	13.3758	0.000254895	0.0590037
comp2251922_c0_seq3	-1.97128	-0.0394508	13.3749	0.000255015	0.0590037
comp2271675_c0_seq2	1.71278	4.23	13.2775	0.000268611	0.0618745
comp2255199_c0_seq1	-4.06615	-1.80119	13.2476	0.000272929	0.0625921
comp2161279_c0_seq1	-3.84206	-3.45234	13.2062	0.000279029	0.0637104
comp2278328_c1_seq1	1.20988	4.80652	13.1876	0.000281814	0.0640375
gnl|Pdu_trscr_assembly_1|19790	1.23335	2.99673	13.1802	0.000282922	0.0640375
comp2265084_c0_seq1	2.03492	4.09042	13.1375	0.000289441	0.0652295
comp2270547_c0_seq3	1.59232	0.848657	13.1238	0.000291561	0.065424
comp2278132_c0_seq9	1.3669	4.49181	13.1026	0.00029488	0.0658848
comp2150525_c0_seq1	-3.68662	-3.64796	13.0753	0.000299217	0.0665682
comp2227048_c0_seq1	-3.45611	-3.34221	12.9791	0.000314988	0.0696112
comp2229085_c0_seq1	2.1553	-0.437931	12.9591	0.000318374	0.0696112
comp1193922_c0_seq1_contamination	-3.45942	-3.39526	12.9545	0.000319161	0.0696112
comp2231231_c0_seq1	-3.70587	-3.52813	12.9533	0.000319357	0.0696112
comp2246567_c0_seq1	-3.20095	-2.09476	12.952	0.000319581	0.0696112
comp2194184_c0_seq1	-3.67285	-2.94863	12.9373	0.000322102	0.0697082
comp2243178_c0_seq2	1.80272	-0.605774	12.9338	0.000322705	0.0697082
comp2251422_c0_seq2	1.51238	0.827881	12.8934	0.000329742	0.070928
comp2254237_c0_seq5	1.62669	3.55762	12.8858	0.000331076	0.070928
comp2222975_c0_seq1	-3.09195	-0.422622	12.8542	0.000336721	0.0718416
comp2269417_c0_seq1	1.44093	2.37971	12.8361	0.00033999	0.0720585
comp2275240_c0_seq5	-3.02449	1.05343	12.8271	0.00034164	0.0720585
comp2259412_c0_seq3	-2.10178	2.74926	12.8193	0.000343063	0.0720585
comp2250112_c0_seq1	1.74965	1.97906	12.812	0.000344405	0.0720585
comp2277661_c0_seq18	1.10196	3.90077	12.8106	0.000344658	0.0720585
comp2204847_c0_seq1	3.87618	2.12884	12.7737	0.000351526	0.0726587
comp2272620_c1_seq2	1.88961	0.499089	12.7687	0.000352477	0.0726587
comp2269403_c0_seq8	1.11055	4.95102	12.7685	0.000352505	0.0726587
comp2220048_c0_seq3	-3.52094	-3.46128	12.7653	0.000353112	0.0726587
comp2201951_c0_seq1	-4.34858	-1.57992	12.7076	0.000364164	0.0744629
comp2260931_c0_seq2	2.14371	0.353881	12.7013	0.000365408	0.0744629
comp2188826_c0_seq1	-4.56733	-1.18788	12.6858	0.000368438	0.0744629
comp2139879_c0_seq2	2.47134	-1.52496	12.6829	0.000369006	0.0744629
comp2269845_c0_seq3	1.5974	1.20542	12.6759	0.000370395	0.0744629
comp2138762_c0_seq1	-3.44445	-3.11274	12.6756	0.000370462	0.0744629
comp2251523_c0_seq1	2.06086	2.17711	12.6652	0.000372519	0.0745882
comp2275952_c0_seq1	2.26433	0.457655	12.656	0.00037436	0.0746698
comp2245947_c0_seq1	2.68028	0.238947	12.611	0.000383488	0.0758884
comp2246430_c0_seq1	3.09588	-0.314299	12.6083	0.000384029	0.0758884
comp2272798_c0_seq1	1.3667	1.68381	12.5988	0.000386001	0.0758884
comp2272423_c0_seq3	1.96759	0.606533	12.5917	0.000387457	0.0758884
comp2014777_c0_seq1	-3.76464	-3.77301	12.5903	0.000387759	0.0758884
comp2274070_c0_seq1	-2.52178	-1.98908	12.5828	0.000389317	0.0759081
comp2198805_c0_seq1	1.7962	0.675818	12.542	0.000397897	0.0772915
comp2264246_c0_seq1	1.90462	3.49292	12.5124	0.000404268	0.0782372
gnl|Pdu_trscr_assembly_1|6033	1.96657	0.773911	12.4987	0.000407228	0.0783055
comp2239053_c0_seq1	1.98422	-0.282987	12.4969	0.00040763	0.0783055
comp2239650_c1_seq3	-3.376	-3.48133	12.4806	0.000411204	0.0785179
comp2271448_c0_seq1	2.24146	1.92408	12.478	0.000411782	0.0785179
comp2242891_c0_seq2_contamination	-3.49543	-2.75859	12.4713	0.00041326	0.0785179
comp2267005_c0_seq1	2.21652	2.02799	12.4482	0.000418399	0.0790691
comp2221079_c1_seq1	-2.62388	-1.88846	12.4446	0.000419199	0.0790691
comp2264685_c0_seq2	1.75043	3.06236	12.4273	0.000423112	0.079519
comp2254845_c0_seq2	1.92792	-0.158924	12.3999	0.000429349	0.0804011
comp2273129_c0_seq7	2.60534	4.30543	12.3924	0.000431085	0.0804367
comp2272996_c4_seq1	-3.24678	-2.93415	12.3481	0.00044143	0.0820066
comp2274258_c0_seq1	-2.85358	-2.3562	12.3395	0.000443475	0.0820066
comp2243922_c0_seq1	1.95924	-0.0461595	12.3363	0.000444224	0.0820066
comp2260302_c0_seq2	1.6908	3.84578	12.2778	0.000458384	0.0843216
comp2272847_c1_seq1	2.61905	-0.868148	12.2515	0.000464891	0.0852175
comp2273617_c0_seq2	-4.66866	-1.51017	12.2311	0.000469985	0.0858489
comp2257194_c0_seq1	-3.98939	-3.57352	12.2051	0.000476597	0.0865568
comp2242943_c0_seq1	1.97063	-0.550457	12.2028	0.000477186	0.0865568
comp2267356_c1_seq8	1.2489	3.38892	12.1648	0.000486995	0.0876142
comp1981028_c0_seq1	1.50868	1.57588	12.1637	0.000487291	0.0876142
comp2251343_c0_seq4	2.74629	-3.03953	12.1548	0.000489627	0.0876142
comp2256540_c0_seq2	1.59217	2.30482	12.1519	0.000490374	0.0876142
comp1188335_c0_seq1	-3.47284	-3.36563	12.1479	0.00049143	0.0876142
comp2240169_c0_seq2	2.52571	0.260301	12.1392	0.000493727	0.0876364
comp2216390_c0_seq1	-2.68856	-2.92117	12.1347	0.000494921	0.0876364
isotig10568	-1.64124	6.51839	12.12	0.000498844	0.0880315
comp2199263_c0_seq2	-1.67579	5.73415	12.1122	0.000500939	0.0881026
comp2278218_c0_seq1	1.35538	6.01519	12.0927	0.000506198	0.0887278
comp2219987_c0_seq3	-3.1556	1.55499	12.0853	0.00050822	0.0887833
comp2048295_c0_seq1_contamination	-4.49339	-3.65325	12.0758	0.0005108	0.0889264
comp2275034_c0_seq1	-2.81075	-1.62631	12.0698	0.000512456	0.0889264
comp2269093_c0_seq2	2.25297	0.514019	12.0557	0.000516353	0.0890844
comp2272329_c0_seq1	2.31552	2.69948	12.0541	0.000516788	0.0890844
comp2261973_c0_seq3	2.88709	-3.19242	12.0478	0.00051853	0.0890897
comp2226073_c0_seq2	2.67764	-0.34317	12.0139	0.000528053	0.0904274
comp2254440_c0_seq1	-1.50646	0.430436	11.9674	0.000541404	0.0924097
comp1897486_c1_seq1	-2.98867	-2.13538	11.9494	0.000546642	0.0929988
comp2272490_c0_seq11	1.91073	1.17685	11.934	0.000551192	0.0931674
comp2251791_c0_seq2	1.57607	3.61929	11.9339	0.000551212	0.0931674
comp2266844_c0_seq4	1.31497	4.58821	11.9178	0.000555992	0.0933938
comp2274728_c1_seq5	1.69537	3.75355	11.9173	0.000556139	0.0933938
comp2266747_c0_seq1	1.61883	3.34575	11.9081	0.000558902	0.0935559
comp2254253_c1_seq2	-2.23699	-1.5	11.8902	0.00056431	0.0941583
comp2221253_c0_seq1	-4.16513	-4.05046	11.875	0.000568931	0.0946262
comp2269142_c2_seq8	1.64046	1.33837	11.8535	0.000575533	0.0949275
comp2271159_c0_seq3	1.54773	5.92201	11.8521	0.000575974	0.0949275
comp1176355_c0_seq2	-4.51195	-3.97253	11.8513	0.000576213	0.0949275
comp2190011_c0_seq1	2.16287	-0.885317	11.8225	0.000585178	0.0957655
comp1173842_c0_seq1	-3.67642	-3.60661	11.8176	0.000586737	0.0957655
comp2254675_c0_seq1	1.58441	4.47729	11.8173	0.000586818	0.0957655
comp2217456_c1_seq1	-4.12798	-3.96247	11.8068	0.00059016	0.0960099
comp2243394_c0_seq1	-2.97713	-2.85417	11.8005	0.000592132	0.0960306
comp2020887_c0_seq1	-3.05733	-3.57084	11.7919	0.0005949	0.096092
comp2138000_c0_seq1	1.45224	4.28315	11.7878	0.000596202	0.096092
comp2227128_c0_seq1	-3.52194	-3.08782	11.7282	0.000615609	0.0989135
comp2276993_c0_seq6	1.52453	2.27184	11.715	0.000619998	0.0991427
comp2253990_c0_seq2	3.7301	-2.76998	11.7124	0.000620844	0.0991427
comp2270565_c0_seq2	1.06345	3.30787	11.7052	0.00062326	0.0992241
comp2273403_c0_seq2	1.13956	7.28324	11.6863	0.000629632	0.0999322
comp2245053_c0_seq1	1.55311	2.05707	11.6806	0.000631547	0.0999322

## Sheet: IM_NM vs PM_NM_Male
	logFC	logCPM	LR	PValue	FDR
comp2240042_c0_seq1	9.59421	-1.44937	44.3972	2.68076e-11	1.39558e-06
comp2200231_c1_seq1	7.46099	2.76429	41.6555	1.0886e-10	2.83357e-06
comp2258476_c0_seq2	4.16517	-0.0824465	36.6623	1.4047e-09	2.43758e-05
comp2267260_c0_seq1	2.64111	3.89249	34.4079	4.469e-09	5.81629e-05
comp2279271_c0_seq1	5.60481	-0.43622	33.5928	6.79438e-09	7.07418e-05
comp2277336_c1_seq6	2.41776	5.54272	32.9843	9.29037e-09	7.29776e-05
comp2247380_c0_seq1	3.66136	1.60651	32.878	9.81277e-09	7.29776e-05
comp2231117_c0_seq1	5.54143	-0.949405	30.5625	3.23275e-08	0.000207767
comp2268323_c0_seq1	6.04903	1.17551	30.3582	3.5919e-08	0.000207767
comp2247432_c0_seq1	4.6053	0.523105	29.8493	4.66963e-08	0.000243096
comp2244843_c0_seq4	6.32689	-0.888051	29.4757	5.6621e-08	0.000267967
comp2236689_c0_seq1	3.32933	-0.238635	28.9523	7.41824e-08	0.000321822
comp2267940_c1_seq3	4.66573	2.12633	28.4901	9.41795e-08	0.000377145
comp2269080_c0_seq1	3.12097	1.27669	28.1488	1.12337e-07	0.000417724
comp2252156_c0_seq4	6.56486	2.2487	27.9654	1.23504e-07	0.000428633
comp2257660_c0_seq2	2.43559	1.63987	27.6217	1.47514e-07	0.000479964
comp2276727_c0_seq2	3.04593	0.559354	26.7778	2.28244e-07	0.00069895
comp2261851_c1_seq1	1.81648	5.29074	26.4222	2.74369e-07	0.000768043
comp2252042_c0_seq1	1.99282	1.90216	26.3808	2.80313e-07	0.000768043
comp2269538_c0_seq1	4.84487	1.51117	25.0266	5.65436e-07	0.0014718
comp2272964_c0_seq1	2.56041	2.15787	24.835	6.24537e-07	0.00154823
comp2234463_c0_seq2	3.96891	2.5932	24.5677	7.17461e-07	0.00168979
comp2197726_c1_seq1	4.12575	-0.494477	24.4714	7.54211e-07	0.00168979
comp2247744_c0_seq2	-1.88017	2.77222	24.409	7.79019e-07	0.00168979
comp2278332_c0_seq1	1.72465	4.40038	23.9159	1.00636e-06	0.00209561
comp2255776_c1_seq1	3.45293	-0.513251	23.8362	1.04892e-06	0.00210022
comp2274415_c0_seq2	1.71964	3.46324	22.804	1.79395e-06	0.00345893
comp2277164_c0_seq2	2.1459	4.23172	22.5073	2.09342e-06	0.00389219
comp2276498_c0_seq1	2.48032	4.48746	22.4254	2.18461e-06	0.00392167
comp2266084_c0_seq1	-2.352	-0.296823	22.0155	2.70453e-06	0.00457155
comp2276134_c0_seq2	3.19691	1.2394	22.003	2.72226e-06	0.00457155
comp2267586_c4_seq1	-2.76103	-0.438626	21.773	3.06893e-06	0.00499267
comp2276498_c2_seq1	2.42987	3.02858	21.4191	3.69077e-06	0.00579943
comp2142040_c0_seq1	3.30733	2.03938	21.3694	3.78763e-06	0.00579943
comp2236614_c0_seq1	1.75206	4.40733	20.809	5.07434e-06	0.00754757
comp2277499_c0_seq2	1.63447	5.59319	20.6058	5.64258e-06	0.00815964
comp2222433_c0_seq1	4.88429	-1.92871	20.4165	6.22895e-06	0.00876414
comp2259749_c0_seq5	1.59663	1.92226	20.2598	6.76069e-06	0.0092175
comp2251540_c0_seq1	4.29659	-0.18318	20.2193	6.90529e-06	0.0092175
comp2266186_c0_seq8	2.03843	3.00286	19.8954	8.17975e-06	0.0106267
comp2263164_c1_seq3	2.24243	1.4941	19.7936	8.62728e-06	0.0106267
comp2229493_c0_seq1	6.08114	1.62711	19.7646	8.7592e-06	0.0106267
comp2274731_c0_seq1	1.95922	7.39048	19.7606	8.77751e-06	0.0106267
comp2267342_c0_seq3	-2.14662	-0.422465	19.6936	9.09043e-06	0.0107554
comp2228189_c0_seq2	3.01586	-1.44819	19.5423	9.83976e-06	0.0113833
comp2275106_c0_seq3	3.38228	-0.0156284	19.0967	1.24261e-05	0.0140628
comp2264311_c1_seq1	2.23306	2.401	18.8579	1.40828e-05	0.0155986
comp2272893_c0_seq2	2.41835	2.74	18.6227	1.59309e-05	0.0172199
comp2268313_c1_seq4	2.01389	4.52889	18.5899	1.62081e-05	0.0172199
comp2276498_c1_seq1	2.55862	2.50181	18.5251	1.67685e-05	0.017459
comp2140307_c0_seq1	2.57128	-0.0906035	18.4804	1.71658e-05	0.0175222
comp2251281_c0_seq2	3.54639	-1.63487	18.3784	1.81098e-05	0.0180005
comp2258284_c0_seq4	2.17649	3.90309	18.3558	1.83259e-05	0.0180005
comp2254293_c0_seq3	-3.66971	-0.717317	18.225	1.96282e-05	0.0189226
comp1176386_c0_seq1	4.7938	-2.63753	18.1592	2.03186e-05	0.0189987
comp2198805_c0_seq1	2.18244	0.675818	18.1229	2.07099e-05	0.0189987
comp2273024_c0_seq1	2.39712	1.73313	18.1144	2.08019e-05	0.0189987
comp2263114_c0_seq2	5.14285	0.0327027	18.0288	2.17594e-05	0.0191783
comp2267077_c0_seq2	1.42421	4.39685	18.0135	2.19343e-05	0.0191783
comp2246635_c0_seq1	2.06735	1.9533	17.9989	2.21037e-05	0.0191783
comp2258861_c0_seq2	2.93197	1.683	17.4901	2.88805e-05	0.0246474
comp2275532_c0_seq1	1.86468	2.71642	17.4561	2.94024e-05	0.024688
comp2201951_c0_seq1	-5.55242	-1.57992	17.3615	3.0902e-05	0.0254103
comp2257701_c0_seq1	1.84254	1.64116	17.3409	3.12388e-05	0.0254103
comp2258055_c0_seq2	-3.89814	-2.6508	17.1333	3.48468e-05	0.0279091
comp2273034_c0_seq1	1.81216	2.23786	16.9734	3.79072e-05	0.0295119
comp2274631_c0_seq3	2.02164	1.91075	16.9561	3.82546e-05	0.0295119
comp2221142_c0_seq1	2.09717	6.34025	16.9032	3.93356e-05	0.0295119
comp2166111_c0_seq1	-5.3863	-2.12538	16.9018	3.93645e-05	0.0295119
comp1769718_c0_seq1	1.92848	4.97044	16.8865	3.96826e-05	0.0295119
comp2256595_c0_seq1	2.74799	0.31879	16.7006	4.37672e-05	0.0320912
comp2255742_c0_seq1	-5.23369	-3.80823	16.5834	4.6556e-05	0.0333072
comp2236094_c0_seq1	1.99673	1.40501	16.5774	4.67052e-05	0.0333072
comp2271734_c0_seq2	2.44022	1.19329	16.453	4.98703e-05	0.0350837
comp2263067_c0_seq4	1.58703	7.04781	16.1773	5.76801e-05	0.0400369
comp2276461_c0_seq7	1.67873	3.89542	16.0792	6.0749e-05	0.0411586
comp2267060_c0_seq1	1.63093	2.88976	16.0587	6.14082e-05	0.0411586
comp2254664_c0_seq1	2.13333	0.817135	16.0472	6.17828e-05	0.0411586
comp2245335_c0_seq1	2.68117	1.26265	16.0266	6.24585e-05	0.0411586
comp2269341_c0_seq4	2.42121	0.55375	15.9702	6.43491e-05	0.0418744
comp2242967_c0_seq5	5.74727	-3.40809	15.9053	6.65934e-05	0.0427998
comp2251605_c0_seq1	2.23966	4.29658	15.8266	6.94184e-05	0.0440714
comp2258100_c0_seq2	2.73218	0.234329	15.7976	7.04904e-05	0.0442128
comp2256863_c3_seq1	-4.96093	-3.97146	15.7561	7.20542e-05	0.0446556
comp2273312_c0_seq15	1.65241	1.94372	15.7185	7.35012e-05	0.0446819
comp2235322_c0_seq1	1.79957	2.43426	15.7105	7.38132e-05	0.0446819
comp2270244_c0_seq2	1.89763	1.67194	15.663	7.56907e-05	0.0452917
comp2272039_c0_seq1	1.61945	3.68096	15.5985	7.83175e-05	0.0461821
comp2254167_c0_seq1	2.04247	6.0144	15.57	7.95052e-05	0.0461821
comp2269532_c0_seq13	2.49575	6.68294	15.5621	7.98399e-05	0.0461821
comp2231246_c1_seq1	-3.74003	-2.72304	15.5315	8.11427e-05	0.0464198
comp2262088_c1_seq1	-4.08353	-2.60965	15.2674	9.33149e-05	0.052803
comp2271113_c0_seq5	1.67285	5.08921	15.1805	9.7707e-05	0.0542172
comp2259573_c0_seq1	-2.24432	3.56244	15.1768	9.7897e-05	0.0542172
comp2221608_c0_seq2	-1.64479	0.0774084	15.1096	0.000101448	0.0555923
comp2254542_c0_seq1	2.67618	5.21993	15.0778	0.00010317	0.055947
comp2140879_c0_seq1	5.23995	-1.53355	14.8111	0.000118834	0.0637773
comp2250678_c0_seq1	2.47974	-0.499033	14.7811	0.000120739	0.0641383
comp2267870_c0_seq2	2.4745	0.749472	14.6222	0.000131358	0.0690742
comp2199649_c0_seq2	1.97417	2.06481	14.4273	0.000145678	0.0758387
comp1922484_c1_seq1	-4.02888	-3.61963	14.395	0.000148196	0.0763853
comp2133509_c0_seq1	-4.90957	-3.74353	14.3649	0.000150585	0.0764119
comp2271881_c0_seq1	2.06304	0.948349	14.3481	0.000151933	0.0764119
comp2263543_c0_seq5	1.81935	2.42011	14.2974	0.000156078	0.0764119
comp2262980_c0_seq1	2.21468	3.34923	14.2884	0.000156827	0.0764119
comp2269238_c0_seq1	1.2728	3.39579	14.2862	0.00015701	0.0764119
comp2268904_c0_seq2	1.90188	1.80309	14.2857	0.000157054	0.0764119
comp2267420_c0_seq2	3.7018	1.06062	14.2297	0.000161793	0.076484
comp2243124_c0_seq1	-3.8062	-2.08999	14.228	0.000161947	0.076484
comp2264027_c0_seq3	1.72339	4.59381	14.2203	0.000162609	0.076484
comp2240935_c0_seq1	3.2065	-1.52237	14.2148	0.000163079	0.076484
comp2178895_c0_seq1	2.74352	-2.19029	14.1819	0.000165957	0.077139
comp2273595_c0_seq1	1.68163	4.81815	14.0965	0.000173671	0.0800101
comp2264837_c1_seq1	-2.99756	0.0243885	14.0776	0.00017542	0.080107
comp2249384_c0_seq1	1.74103	1.17952	14.0168	0.000181188	0.081723
comp2203536_c0_seq1	-3.3925	-2.43436	14.0032	0.000182498	0.081723
comp2252395_c0_seq4	-5.46368	-3.55577	13.9912	0.000183668	0.081723
comp2195281_c0_seq1	-5.41129	-3.52124	13.9448	0.000188253	0.0830532
comp2254040_c0_seq2	-2.47708	-0.580304	13.9179	0.000190974	0.0835453
comp2277462_c0_seq1	1.47888	1.7942	13.8457	0.000198445	0.0860357
comp2264442_c1_seq1_contamination	-3.27295	1.28513	13.8201	0.000201174	0.0860357
comp2276667_c0_seq4	1.28596	2.82143	13.8159	0.000201624	0.0860357
comp2269093_c0_seq2	2.42516	0.514019	13.798	0.000203557	0.0861541
comp2278108_c1_seq1	1.55088	7.13272	13.7593	0.000207787	0.0872353
comp2259529_c0_seq1	1.43828	5.86214	13.7293	0.00021114	0.0872874
comp2264395_c0_seq2	2.38902	-1.30473	13.7074	0.000213611	0.0872874
comp2271575_c0_seq13	1.4867	4.39165	13.6977	0.000214722	0.0872874
comp2270639_c0_seq2	3.22284	-0.58744	13.6895	0.00021566	0.0872874
comp2243820_c0_seq1	1.50172	1.53332	13.656	0.000219535	0.0872874
comp2270228_c0_seq1	1.48165	5.17919	13.621	0.000223672	0.0872874
comp2231262_c0_seq2	1.80876	0.347592	13.5923	0.000227109	0.0872874
comp2245947_c0_seq1	2.79525	0.238947	13.5855	0.000227941	0.0872874
comp2248955_c0_seq1	3.41739	0.503731	13.5831	0.000228226	0.0872874
comp2276940_c0_seq2	1.61374	5.48673	13.5795	0.000228665	0.0872874
comp2264711_c0_seq7	4.19168	-1.83166	13.5661	0.000230305	0.0872874
comp2266374_c0_seq1	1.92932	2.8915	13.5504	0.000232242	0.0872874
comp1838578_c0_seq1	2.06973	10.1589	13.5468	0.00023269	0.0872874
comp2238675_c0_seq2	2.08476	-1.23366	13.5252	0.000235377	0.0872874
comp2263897_c0_seq7	-2.77116	3.55342	13.5238	0.000235556	0.0872874
comp2256299_c0_seq1	2.05844	-0.364258	13.5217	0.00023582	0.0872874
comp2268249_c0_seq4	-2.04646	1.44894	13.5162	0.000236514	0.0872874
comp2195994_c0_seq1	2.22668	1.25853	13.5037	0.000238092	0.0872874
comp2272507_c0_seq3	1.94875	3.98686	13.4606	0.000243624	0.0885167
comp2222975_c0_seq1	-3.19803	-0.422622	13.4512	0.000244845	0.0885167
comp2264836_c0_seq3	-2.66127	-0.122775	13.4355	0.000246901	0.0886441
comp2261228_c0_seq1	1.39704	2.68582	13.3736	0.000255186	0.0909912
comp2262619_c1_seq2	1.51521	3.14844	13.3384	0.000260028	0.0920872
comp2277981_c0_seq1	1.49742	6.03791	13.3128	0.000263596	0.0925075
comp2254650_c0_seq2	3.6896	1.98848	13.3011	0.000265244	0.0925075
comp2274934_c0_seq9	1.22147	6.71185	13.292	0.000266546	0.0925075
comp2141094_c0_seq2	2.91768	-1.19295	13.2674	0.000270068	0.0925445
comp2266448_c1_seq3	2.0386	4.79332	13.2664	0.000270208	0.0925445
comp1193922_c0_seq1_contamination	-3.72427	-3.39526	13.2112	0.000278287	0.0946885
comp1880882_c1_seq1	-5.13772	-3.25626	13.166	0.000285073	0.0963675
comp2278106_c0_seq4	2.05457	0.345917	13.1427	0.000288637	0.0969429
comp2254641_c1_seq1	1.51969	4.51679	13.0793	0.000298579	0.0996393

## Sheet: IM_NM vs M_NM_Female
	logFC	logCPM	LR	PValue	FDR
comp2257567_c0_seq1	7.63696	5.93736	263.111	3.60033e-59	1.8743e-54
comp2269662_c0_seq8	8.74653	8.84258	256.647	9.23631e-58	2.40417e-53
comp2265326_c0_seq3	-8.38263	7.37152	185.781	2.6497e-42	4.59803e-38
comp2256337_c0_seq2	7.34639	2.97697	176.48	2.84514e-40	3.70288e-36
comp2265263_c0_seq1	7.34353	6.34179	173.804	1.09242e-39	1.1374e-35
comp2265751_c0_seq4	8.0471	3.4265	172.407	2.20567e-39	1.91375e-35
isotig10568	-8.77437	6.51839	166.949	3.43146e-38	2.55198e-34
comp2240916_c0_seq1	-6.59325	4.92009	164.712	1.05759e-37	6.88214e-34
comp2236959_c0_seq1	6.94006	4.69004	145.413	1.74423e-33	1.00892e-29
comp2272108_c0_seq1	5.26114	6.16472	143.71	4.11051e-33	2.13989e-29
comp2223254_c0_seq1	9.25888	5.43078	138.501	5.66195e-32	2.6796e-28
comp2234324_c0_seq2	12.0314	6.62715	136.762	1.35925e-31	5.89678e-28
comp2257715_c1_seq3	4.72345	5.86428	132.825	9.87622e-31	3.95497e-27
comp2261876_c0_seq1	-4.75737	5.12508	132.626	1.09136e-30	4.05824e-27
comp2261851_c1_seq1	-5.47204	5.29074	130.592	3.04153e-30	1.05559e-26
comp2274137_c0_seq1	-5.74682	7.12682	127.609	1.36653e-29	4.44626e-26
comp2261980_c0_seq3	-7.31513	7.50963	127.263	1.62726e-29	4.98314e-26
comp2272343_c0_seq3	-6.15683	4.68973	123.751	9.55128e-29	2.76239e-25
comp2215885_c0_seq1	9.13606	2.79247	122.647	1.66575e-28	4.56407e-25
comp2254792_c1_seq4	9.66139	8.05803	120.292	5.45925e-28	1.42102e-24
comp2262137_c0_seq3	-7.14526	4.38057	120.039	6.20189e-28	1.53745e-24
comp2271537_c0_seq19	4.07272	4.91343	119.19	9.51668e-28	2.25195e-24
comp2224089_c0_seq1	4.94556	3.91417	118.963	1.06702e-27	2.41513e-24
comp2261608_c0_seq1	8.19646	6.38239	113.662	1.5455e-26	3.35238e-23
comp2262443_c0_seq1	4.81062	6.78077	113.547	1.63749e-26	3.40985e-23
comp2258675_c0_seq3	4.66674	3.60954	112.226	3.18856e-26	6.38435e-23
comp2275713_c0_seq3	5.40126	9.28827	111.618	4.33259e-26	8.35372e-23
comp2250225_c0_seq2	5.03789	6.8322	110.58	7.31306e-26	1.35823e-22
comp2244589_c0_seq2	6.4449	7.25102	110.513	7.56617e-26	1.35823e-22
comp2205302_c0_seq1	4.47508	3.5896	109.295	1.3983e-25	2.42646e-22
comp2242933_c0_seq1	5.8972	9.31557	107.815	2.95123e-25	4.95606e-22
comp2270003_c1_seq1	6.09725	1.5458	107.381	3.67273e-25	5.97495e-22
comp2253407_c0_seq3	-6.45734	8.57328	102.335	4.6878e-24	7.39522e-21
comp2262279_c0_seq1	9.70475	8.15195	101.817	6.09031e-24	8.99792e-21
comp2272437_c1_seq1	-5.57043	8.89848	101.812	6.10413e-24	8.99792e-21
comp2272119_c0_seq6	4.56174	2.9051	101.774	6.22227e-24	8.99792e-21
comp2253801_c0_seq1	5.89459	3.26888	100.985	9.26872e-24	1.30411e-20
comp2271249_c0_seq23	6.24339	5.47995	99.922	1.58517e-23	2.17164e-20
comp2272093_c0_seq1	-3.86594	5.13846	98.2503	3.6871e-23	4.92171e-20
comp2270003_c0_seq1	6.82759	2.66843	97.4308	5.57724e-23	7.25863e-20
comp1194608_c0_seq1	4.03233	4.67432	95.9491	1.17873e-22	1.49667e-19
comp2271713_c0_seq1	-5.64682	6.10047	95.8952	1.21126e-22	1.50136e-19
comp2281046_c0_seq1	-6.7601	2.94016	95.6148	1.39557e-22	1.68958e-19
comp2263873_c0_seq9	-5.17008	5.50438	95.4527	1.51466e-22	1.79208e-19
comp2269234_c0_seq4	-4.80804	2.49733	95.3553	1.59106e-22	1.84065e-19
comp2276073_c1_seq1	5.89443	3.72847	94.8367	2.06755e-22	2.33988e-19
comp2273601_c1_seq1	4.53263	2.592	93.998	3.15839e-22	3.49835e-19
comp2272379_c0_seq9	4.5609	6.18735	93.4916	4.07924e-22	4.42419e-19
comp2247098_c0_seq1	-6.39296	4.37969	93.2187	4.68226e-22	4.97456e-19
comp2259403_c0_seq2	-5.5963	3.83382	92.9396	5.39148e-22	5.61351e-19
comp2272553_c0_seq5	-3.76735	4.59328	92.0329	8.52455e-22	8.70156e-19
comp2254414_c0_seq1	3.33074	3.41034	91.9425	8.92313e-22	8.93326e-19
comp2267304_c0_seq3	4.34643	4.92572	90.0606	2.30974e-21	2.26874e-18
comp1193006_c0_seq1	7.03056	0.373835	89.7874	2.65174e-21	2.55643e-18
comp2270871_c0_seq1	-5.86307	4.2809	89.3829	3.25339e-21	3.07943e-18
comp2255923_c0_seq3	5.51856	3.62154	89.3397	3.32521e-21	3.0912e-18
comp2232271_c0_seq1	5.61167	2.06971	89.0506	3.84838e-21	3.51479e-18
comp2273459_c1_seq1	5.09374	1.94567	88.6984	4.59835e-21	4.12733e-18
comp2273459_c0_seq2	5.50363	3.84461	87.5145	8.3664e-21	7.38215e-18
comp2276073_c0_seq1	5.63327	1.96539	87.1772	9.92229e-21	8.60907e-18
gnl|Pdu_trscr_assembly_1|200732	-5.44876	8.313	86.2712	1.5688e-20	1.33885e-17
comp2272698_c0_seq4	3.12536	6.84671	85.7281	2.06462e-20	1.73358e-17
comp2239858_c0_seq1	4.81483	4.73312	84.6907	3.48894e-20	2.88303e-17
comp2280824_c0_seq1	3.62485	5.28267	84.5113	3.82026e-20	3.10749e-17
comp2278464_c0_seq2	-3.44591	7.52476	84.0314	4.8698e-20	3.90026e-17
comp2221300_c0_seq1	4.58364	1.67788	83.8837	5.24747e-20	4.13906e-17
comp2268819_c2_seq1	6.09878	4.60513	82.8289	8.94733e-20	6.95208e-17
comp2276244_c0_seq1	-3.27042	5.81839	82.435	1.09204e-19	8.36037e-17
comp2251620_c0_seq1	-3.65414	7.38473	82.3885	1.118e-19	8.43508e-17
comp2273249_c0_seq4	-5.81353	7.62828	82.1724	1.2472e-19	9.27539e-17
comp2252195_c0_seq1	5.86399	3.89653	81.36	1.88129e-19	1.37941e-16
comp2268687_c0_seq1	6.17584	6.58489	80.7169	2.60491e-19	1.88346e-16
comp1281272_c0_seq1	-4.90528	4.55933	80.3593	3.12157e-19	2.2261e-16
gnl|Pdu_trscr_assembly_1|20388	-4.6068	5.87661	79.5811	4.62841e-19	3.25609e-16
comp2277995_c0_seq1	-3.37843	7.4765	79.1783	5.675e-19	3.93913e-16
comp2235052_c0_seq1	7.44779	3.52042	78.1217	9.68815e-19	6.63625e-16
comp2202652_c0_seq2	4.62789	3.18167	76.8957	1.80234e-18	1.21854e-15
comp2267655_c0_seq21	4.18732	7.54362	76.5509	2.14605e-18	1.43232e-15
comp2241134_c0_seq1	-3.21305	4.785	76.2759	2.46679e-18	1.62555e-15
comp2234282_c0_seq1	4.03641	5.73055	75.7913	3.15291e-18	2.05172e-15
gnl|Pdu_trscr_assembly_1|1213	4.29519	9.46197	75.0635	4.55817e-18	2.92955e-15
comp2209056_c0_seq1	8.28791	3.1676	74.9641	4.7935e-18	3.04323e-15
comp2256041_c0_seq1	3.25814	9.69881	74.8644	5.04176e-18	3.16227e-15
comp2272370_c0_seq4	3.235	3.67032	74.1285	7.31928e-18	4.5223e-15
comp2265255_c2_seq1	-6.09541	9.64754	74.1112	7.38385e-18	4.5223e-15
comp2282195_c0_seq2	3.63517	6.79314	74.0569	7.58956e-18	4.59424e-15
comp2243368_c0_seq4	-4.26146	3.65696	73.7796	8.73467e-18	5.22665e-15
comp2275893_c0_seq1	-5.65668	7.97309	73.7337	8.93997e-18	5.25398e-15
comp2254367_c0_seq1	-3.17701	3.99972	73.7244	8.98219e-18	5.25398e-15
comp2273978_c0_seq1	3.71349	5.35201	73.1276	1.2153e-17	7.02971e-15
comp2264786_c0_seq1	3.56944	3.10823	72.9649	1.31979e-17	7.55021e-15
comp2275310_c0_seq1	3.61725	4.87924	72.645	1.55198e-17	8.78204e-15
comp2261795_c0_seq1	-3.94924	2.43575	72.5322	1.64327e-17	9.19862e-15
comp2138076_c0_seq1	4.48704	3.82475	72.5039	1.66703e-17	9.23231e-15
comp2140683_c0_seq1	-5.89287	4.36032	72.1169	2.02819e-17	1.11143e-14
comp2275270_c0_seq2	4.01316	7.8946	71.9436	2.21435e-17	1.2008e-14
gnl|Pdu_trscr_assembly_1|1218	2.83678	3.2937	71.5361	2.72231e-17	1.46104e-14
comp2277776_c0_seq1	3.83631	5.34895	71.4993	2.77362e-17	1.47339e-14
comp2266373_c0_seq1	3.70229	1.77581	71.0616	3.46248e-17	1.82074e-14
comp2238682_c0_seq2	6.55708	2.43675	70.7509	4.05299e-17	2.1075e-14
comp2270561_c0_seq2	3.99867	3.80083	70.7336	4.08878e-17	2.1075e-14
comp2247744_c0_seq2	-3.74248	2.77222	70.1632	5.45949e-17	2.78643e-14
comp2273207_c0_seq5	3.51651	4.49653	69.6336	7.14095e-17	3.60923e-14
comp2266841_c0_seq1	-5.2793	3.6694	69.4739	7.74327e-17	3.87603e-14
comp2238985_c0_seq1	-5.13982	2.68635	69.4231	7.94522e-17	3.93924e-14
comp2261841_c0_seq9	-4.12799	1.61298	69.1979	8.90635e-17	4.37411e-14
comp2274804_c0_seq1	-3.18824	5.19789	68.8056	1.08664e-16	5.22677e-14
comp2260095_c1_seq1	4.9912	1.0617	68.7918	1.09426e-16	5.22677e-14
comp2275616_c0_seq2	-3.59816	4.42988	68.7798	1.10095e-16	5.22677e-14
comp1194290_c0_seq1	-5.76412	4.73292	68.7736	1.10441e-16	5.22677e-14
comp2250762_c0_seq1	-5.95866	3.14948	67.9644	1.66478e-16	7.80781e-14
comp2277584_c0_seq5	3.64295	4.4016	67.8494	1.76476e-16	8.20283e-14
comp2263229_c0_seq2	-5.12079	3.50656	67.6947	1.90879e-16	8.79376e-14
comp2278392_c0_seq1	3.52133	5.51108	67.3587	2.26347e-16	1.03363e-13
comp2277987_c1_seq1	3.49367	6.31038	67.3235	2.30414e-16	1.04305e-13
comp2256943_c0_seq2	4.97114	0.184548	67.2549	2.38571e-16	1.07067e-13
comp2251993_c0_seq1	-5.18388	2.91272	67.2345	2.41064e-16	1.07261e-13
comp2272756_c0_seq1	5.13437	3.28702	66.6896	3.17807e-16	1.40209e-13
comp2269191_c0_seq3	5.00761	3.33105	66.5443	3.42123e-16	1.49669e-13
comp2267875_c0_seq5	2.57931	5.30212	66.4007	3.6798e-16	1.58485e-13
comp2273791_c0_seq4	3.96044	4.39159	66.3986	3.68363e-16	1.58485e-13
comp2271737_c1_seq2	-4.3675	5.52279	66.1241	4.23415e-16	1.80677e-13
comp2274541_c0_seq1	-4.7036	9.55111	65.9383	4.65265e-16	1.96921e-13
comp2273152_c0_seq2	2.57524	5.19464	65.9008	4.74208e-16	1.99087e-13
comp2277510_c0_seq2	-3.25739	4.14415	65.8704	4.81567e-16	2.00559e-13
comp2261501_c0_seq1	-3.91044	3.84797	65.6526	5.37838e-16	2.22217e-13
comp1194202_c0_seq1	-3.77882	3.36752	65.2332	6.65376e-16	2.72747e-13
comp2260003_c0_seq1	4.74241	1.70551	65.1166	7.05934e-16	2.87111e-13
comp2138058_c0_seq1	-7.24113	7.1496	64.9563	7.65761e-16	3.09029e-13
comp2267592_c0_seq1	3.37281	2.68892	64.8723	7.99134e-16	3.20016e-13
comp2272249_c0_seq2	3.29897	3.10433	64.3389	1.04756e-15	4.16297e-13
comp2268528_c0_seq2	-3.15038	3.82423	64.1349	1.16184e-15	4.58215e-13
comp2273540_c0_seq2	-2.91616	4.48179	64.1164	1.17279e-15	4.59054e-13
comp2265611_c0_seq1	-5.67417	2.31777	63.6752	1.46719e-15	5.70002e-13
comp2266185_c0_seq3	5.51473	2.2424	63.5183	1.58887e-15	6.12705e-13
comp2241228_c0_seq2	-3.75391	5.2411	63.2322	1.83722e-15	7.03263e-13
comp2278398_c0_seq2	-5.16666	3.44077	63.0486	2.01672e-15	7.66338e-13
comp2264799_c1_seq2	-3.29755	3.64716	63.0044	2.06246e-15	7.78042e-13
comp2270999_c0_seq5	3.14141	3.72666	62.9746	2.09389e-15	7.84215e-13
comp2248955_c0_seq1	8.20263	0.503731	62.9443	2.12641e-15	7.90705e-13
comp2263011_c0_seq1	3.88293	6.78343	62.8582	2.22139e-15	8.20167e-13
comp2256699_c0_seq2	-4.66422	1.15441	62.7112	2.39347e-15	8.77475e-13
comp2269247_c0_seq1	2.98327	6.76327	62.646	2.47405e-15	9.00677e-13
comp2263829_c0_seq1	-7.40161	1.82397	62.5526	2.59427e-15	9.37884e-13
comp2248585_c0_seq2	-3.7703	2.08953	62.4316	2.75855e-15	9.90395e-13
comp2277104_c0_seq3	-3.09874	6.14275	62.3825	2.82821e-15	1.00845e-12
comp2266942_c0_seq1	5.84466	0.0764987	62.3605	2.86005e-15	1.01287e-12
comp2275741_c0_seq1	2.62329	6.81171	62.0846	3.2901e-15	1.15729e-12
comp2259786_c0_seq4	-3.56234	3.34216	61.9848	3.46112e-15	1.20928e-12
comp2264636_c0_seq1	-2.41957	4.70034	61.7101	3.97933e-15	1.38107e-12
comp2277610_c1_seq3	2.84732	5.49405	61.6672	4.067e-15	1.40214e-12
comp2258227_c1_seq1	-4.58291	1.92498	61.6463	4.11039e-15	1.40778e-12
comp2266075_c0_seq5	4.27786	3.70138	61.5221	4.37801e-15	1.48964e-12
comp2259648_c0_seq1	-6.32327	0.756458	61.469	4.49775e-15	1.52044e-12
comp2277945_c0_seq2	-2.7829	7.75974	61.4469	4.54844e-15	1.52766e-12
comp2265181_c0_seq1	-3.35343	5.60711	61.3533	4.76982e-15	1.58777e-12
comp2270000_c0_seq4	4.88524	4.54323	61.3457	4.7884e-15	1.58777e-12
comp2253317_c0_seq1	2.86102	4.82694	61.2292	5.08031e-15	1.6739e-12
comp2274959_c0_seq5	2.94842	6.79966	61.2112	5.12685e-15	1.67861e-12
comp2273222_c0_seq2	-3.72778	4.52729	61.0473	5.57213e-15	1.813e-12
comp2273919_c0_seq1	3.25627	5.54772	60.615	6.94024e-15	2.24411e-12
comp2274137_c1_seq25	-5.23922	6.40699	60.4353	7.60388e-15	2.44352e-12
comp2272828_c0_seq8	2.93341	4.54052	60.1461	8.80717e-15	2.81284e-12
comp2276390_c2_seq3	2.62664	6.09093	60.0911	9.05652e-15	2.86767e-12
comp2274563_c1_seq9	2.60508	4.25241	60.0841	9.08901e-15	2.86767e-12
comp1192611_c0_seq1	3.59399	3.30986	60.0659	9.17328e-15	2.87682e-12
comp2261193_c1_seq4	4.54645	0.816035	59.8043	1.04775e-14	3.26615e-12
comp2269391_c0_seq1	-3.30356	3.64301	59.6635	1.12546e-14	3.48751e-12
comp2252998_c0_seq2	4.65248	3.75172	59.2605	1.38124e-14	4.23005e-12
comp2263706_c0_seq2	4.77312	0.552448	59.2603	1.38133e-14	4.23005e-12
comp2262714_c0_seq1	3.92932	2.50719	59.1691	1.44689e-14	4.40488e-12
comp2263124_c0_seq2	3.93331	5.65084	59.1187	1.48442e-14	4.49288e-12
comp2272814_c1_seq2	3.19962	6.05663	59.006	1.57192e-14	4.73021e-12
comp2278099_c2_seq1	-3.54398	3.14918	58.984	1.58958e-14	4.75587e-12
comp2253691_c1_seq1	2.92932	6.51485	58.9464	1.62023e-14	4.81987e-12
comp2271848_c0_seq8	-3.27052	4.85653	58.7454	1.79457e-14	5.30816e-12
gnl|Pdu_trscr_assembly_1|88882	4.11526	2.53671	58.5725	1.9594e-14	5.76297e-12
comp2253152_c0_seq1	-2.86818	5.57145	58.5061	2.02661e-14	5.92714e-12
comp2275743_c0_seq2	2.73375	6.43651	58.377	2.16402e-14	6.29367e-12
comp2264911_c0_seq3	6.07092	3.20333	58.1984	2.36974e-14	6.85368e-12
comp2276174_c0_seq14	2.91569	4.12421	58.1632	2.41252e-14	6.93885e-12
comp2259858_c0_seq2	6.17896	0.659871	58.1464	2.4332e-14	6.95988e-12
comp2278536_c1_seq38	-3.01625	8.80251	57.964	2.66953e-14	7.59415e-12
comp2253831_c0_seq1	-3.55305	3.05881	57.4429	3.47929e-14	9.84393e-12
comp2268979_c0_seq1	2.84155	4.57511	57.3935	3.56787e-14	1.004e-11
comp2259861_c0_seq1	-4.47516	1.89026	57.3707	3.60944e-14	1.01024e-11
comp2262241_c0_seq1	-3.90948	5.3541	57.2837	3.77276e-14	1.0503e-11
comp2274900_c0_seq10	3.11874	3.56881	57.1804	3.97619e-14	1.10104e-11
comp2276664_c0_seq46	3.30056	8.21489	56.9192	4.54097e-14	1.25078e-11
comp2268625_c0_seq3	-3.25216	3.08063	56.9067	4.56994e-14	1.25214e-11
comp2279956_c0_seq1	-3.85022	3.51825	56.8886	4.61215e-14	1.25709e-11
comp2268735_c0_seq1	-3.87941	2.15818	56.675	5.14135e-14	1.39403e-11
comp2275031_c2_seq2	-4.83014	2.10686	56.6208	5.28487e-14	1.42552e-11
comp2277335_c1_seq5	2.66351	4.139	56.6016	5.33686e-14	1.43212e-11
comp2272319_c0_seq24	3.45434	10.018	56.5335	5.52478e-14	1.47495e-11
comp2268375_c0_seq1	-3.39815	5.46666	56.4274	5.83121e-14	1.54881e-11
comp2273726_c1_seq7	-2.62086	4.54853	56.377	5.98276e-14	1.581e-11
comp2280841_c0_seq1	4.90713	3.23873	56.3295	6.12887e-14	1.61143e-11
comp2271477_c1_seq2	-3.71924	3.8828	56.073	6.98292e-14	1.82675e-11
comp2257854_c0_seq3	-2.98494	4.02159	55.946	7.44878e-14	1.93888e-11
comp2269064_c0_seq7	3.52799	2.39561	55.8724	7.7329e-14	2.00282e-11
comp2261415_c0_seq1	3.22664	2.16682	55.8497	7.82272e-14	2.01424e-11
comp2243104_c0_seq1	-4.01278	2.16828	55.8418	7.85437e-14	2.01424e-11
comp2266655_c0_seq4	-4.05471	2.66271	55.66	8.61538e-14	2.19857e-11
comp2266869_c0_seq1	-4.10073	3.9903	55.4919	9.38451e-14	2.38316e-11
comp2266106_c0_seq2	3.01029	4.02021	55.311	1.02893e-13	2.60024e-11
comp2200316_c0_seq1	3.14225	4.73646	55.2789	1.04583e-13	2.63019e-11
comp2252381_c0_seq5	-3.99707	2.29829	55.1775	1.10121e-13	2.75616e-11
comp2266776_c0_seq2	3.30856	3.31823	55.1157	1.13639e-13	2.83058e-11
comp2246605_c0_seq1	-2.5178	7.149	55.0631	1.16724e-13	2.89359e-11
comp1927618_c0_seq1	3.25883	2.93187	54.9984	1.20626e-13	2.97616e-11
comp2272870_c0_seq2	4.58976	1.97089	54.9496	1.23659e-13	3.03659e-11
comp2254641_c1_seq1	-3.79657	4.51679	54.829	1.31488e-13	3.21367e-11
comp2277203_c0_seq4	2.35224	5.41909	54.8181	1.32218e-13	3.21641e-11
comp2259832_c0_seq2	2.94981	5.15203	54.4045	1.63188e-13	3.95135e-11
comp2254647_c0_seq2	2.5936	5.32351	54.3045	1.71708e-13	4.1384e-11
comp2266986_c0_seq3	-7.60619	2.90894	54.2233	1.78956e-13	4.2932e-11
comp2276795_c0_seq4	2.67212	4.7065	53.7682	2.25591e-13	5.38718e-11
comp2278279_c1_seq4	3.05068	7.28482	53.3954	2.72736e-13	6.48327e-11
comp2269927_c0_seq1	-4.47511	1.53468	53.3163	2.83944e-13	6.71902e-11
comp2261379_c0_seq1	-3.06983	11.4548	52.9318	3.45341e-13	8.13488e-11
comp2266844_c0_seq4	2.9274	4.58821	52.8017	3.68978e-13	8.65254e-11
comp2276257_c0_seq6	2.59781	3.81837	52.6772	3.93122e-13	9.17737e-11
comp2266966_c1_seq7	4.77389	7.48941	52.6504	3.98539e-13	9.26229e-11
comp2257649_c0_seq1	-5.55865	3.89553	52.6089	4.07038e-13	9.41776e-11
comp2259852_c1_seq1	2.91943	3.93264	52.4423	4.4308e-13	1.02063e-10
comp2269374_c0_seq3	-2.34806	7.46048	52.3915	4.54695e-13	1.04277e-10
comp2267733_c0_seq1	-3.1847	8.19817	52.3705	4.59564e-13	1.04541e-10
comp2266311_c1_seq2	-3.83362	2.10078	52.3693	4.5986e-13	1.04541e-10
comp2269146_c0_seq1	2.55374	9.51253	52.3172	4.72223e-13	1.06885e-10
comp2261061_c0_seq1	3.50688	1.45867	52.2988	4.76677e-13	1.07426e-10
comp2239531_c0_seq1	3.12954	3.75081	52.2166	4.97031e-13	1.1153e-10
comp2269751_c0_seq2	3.14727	2.77427	52.0615	5.3788e-13	1.20178e-10
comp2267731_c0_seq5	-3.86855	2.0282	51.9774	5.61443e-13	1.24907e-10
comp2272075_c0_seq4	4.19318	2.2585	51.9507	5.6912e-13	1.26076e-10
comp2254530_c0_seq1	-3.98989	4.91265	51.8811	5.89654e-13	1.30071e-10
comp2268869_c0_seq6	-4.40656	3.81103	51.865	5.94513e-13	1.3059e-10
comp1933325_c0_seq2	-2.67734	5.67241	51.8343	6.03888e-13	1.32092e-10
comp2253656_c0_seq3	-3.11241	4.56273	51.8139	6.10188e-13	1.32619e-10
comp2259241_c0_seq1	3.50977	1.1569	51.81	6.11396e-13	1.32619e-10
comp2276143_c1_seq1	-3.92854	2.14456	51.6834	6.52116e-13	1.40865e-10
comp2270520_c0_seq5	3.34579	5.51375	51.4504	7.34273e-13	1.57957e-10
comp2252709_c0_seq3	2.46716	3.43174	51.3402	7.7667e-13	1.6639e-10
gnl|Pdu_trscr_assembly_1|12794	-2.41489	8.426	51.2257	8.23343e-13	1.75666e-10
comp2269108_c0_seq5	3.03646	0.981596	51.1501	8.55651e-13	1.81814e-10
comp2264193_c0_seq2	5.89353	0.85994	51.0193	9.14618e-13	1.93553e-10
comp2277815_c1_seq2	3.27183	4.3965	50.9301	9.57161e-13	2.01736e-10
comp2274336_c0_seq18	3.69478	0.181766	50.7859	1.03012e-12	2.16238e-10
comp2273340_c1_seq1	-2.65712	4.23995	50.7196	1.0655e-12	2.22766e-10
comp2219247_c0_seq1	4.43679	0.988112	50.6882	1.0827e-12	2.25458e-10
comp2262305_c0_seq1	-2.4916	7.12029	50.6544	1.10151e-12	2.28459e-10
comp2270387_c0_seq54	2.15513	5.01921	50.4182	1.24237e-12	2.56653e-10
comp2258876_c0_seq1	-5.94657	1.12762	50.3779	1.26816e-12	2.60945e-10
comp2252936_c1_seq1	2.85622	4.28104	50.1179	1.44777e-12	2.96731e-10
comp2249058_c0_seq2	-3.50455	5.09782	50.0643	1.48791e-12	3.0376e-10
comp2229575_c0_seq1	-1.99303	5.2021	49.9638	1.56608e-12	3.18471e-10
comp1267867_c0_seq1	-4.32279	2.1808	49.7679	1.73054e-12	3.50546e-10
comp2273366_c2_seq1	3.11976	2.43808	49.6665	1.82229e-12	3.67701e-10
comp2277992_c0_seq1	3.29586	4.6553	49.473	2.01119e-12	4.04249e-10
comp2267782_c1_seq1	3.59749	1.02027	49.3874	2.10091e-12	4.20658e-10
comp2271744_c0_seq3	-3.44409	2.94846	49.3735	2.11585e-12	4.22027e-10
comp2275258_c0_seq6	-2.42683	6.00561	49.3038	2.19238e-12	4.35622e-10
comp2262137_c0_seq4	-3.0968	7.20717	49.1324	2.39261e-12	4.73601e-10
comp2217620_c0_seq2	6.13339	0.355674	49.0648	2.47647e-12	4.88344e-10
gene19	4.09118	1.23873	49.0125	2.54342e-12	4.99653e-10
comp2270985_c1_seq1	-3.73666	6.20269	48.6724	3.02498e-12	5.92021e-10
comp2254640_c0_seq1	-4.20493	6.67509	48.5946	3.14732e-12	6.13656e-10
comp2278488_c0_seq1	-3.57464	3.76158	48.5351	3.24431e-12	6.30208e-10
comp2254586_c0_seq1	-3.45866	7.04725	48.4237	3.43393e-12	6.64562e-10
comp2279378_c0_seq1	-4.7744	3.01709	48.3842	3.50381e-12	6.75573e-10
comp2275291_c1_seq1	-3.4461	3.40496	48.3297	3.60247e-12	6.92034e-10
comp2272814_c0_seq4	3.19694	4.82038	48.2911	3.6742e-12	7.03218e-10
comp2138995_c0_seq1	3.74039	2.29118	48.2248	3.80051e-12	7.24729e-10
comp2277060_c0_seq17	-3.52307	2.02912	48.1134	4.02276e-12	7.6431e-10
comp2236889_c0_seq1	3.33884	0.936533	48.079	4.0939e-12	7.74998e-10
comp2241847_c0_seq5	-4.37595	1.15812	47.908	4.46689e-12	8.42543e-10
comp2271756_c0_seq2	4.14953	5.38343	47.8423	4.61913e-12	8.66046e-10
comp2267039_c0_seq7	-3.52004	2.54392	47.8399	4.62477e-12	8.66046e-10
comp2267927_c0_seq4	-4.00399	1.7892	47.7934	4.73574e-12	8.83648e-10
gnl|Pdu_trscr_assembly_1|6033	4.16411	0.773911	47.7724	4.78683e-12	8.89991e-10
comp2267710_c1_seq1	-4.97848	1.66814	47.5728	5.29988e-12	9.81874e-10
comp2257070_c0_seq2	-2.76836	12.9253	47.4497	5.64341e-12	1.04181e-09
comp2265937_c0_seq5	-2.40622	5.57126	47.3862	5.82908e-12	1.07228e-09
comp2239753_c0_seq1	4.94484	1.08483	47.2326	6.30439e-12	1.15376e-09
comp2271592_c0_seq12	-3.92545	2.16685	47.2249	6.32914e-12	1.15376e-09
comp2267127_c0_seq1	3.53812	3.37038	47.222	6.33847e-12	1.15376e-09
comp2266348_c1_seq2	2.54737	5.12471	47.1984	6.41526e-12	1.16367e-09
comp2254279_c0_seq1	4.97376	2.91813	47.1861	6.45582e-12	1.16696e-09
comp2271273_c0_seq2	-3.38997	2.37751	47.1286	6.64774e-12	1.19749e-09
comp2276761_c0_seq5	-3.27937	2.9632	47.1175	6.68545e-12	1.20013e-09
comp2277084_c2_seq1	-4.66604	2.59165	47.1088	6.71529e-12	1.20135e-09
comp2261344_c0_seq3	2.54447	3.80383	47.0867	6.79141e-12	1.2108e-09
comp2266909_c1_seq3	3.11126	2.83067	46.999	7.10216e-12	1.26188e-09
comp2271818_c0_seq1	3.43317	2.98857	46.98	7.17134e-12	1.26984e-09
comp2262537_c0_seq3	4.80497	0.390727	46.9633	7.23285e-12	1.27639e-09
comp2275489_c0_seq1	-3.99789	1.35222	46.8731	7.57335e-12	1.33196e-09
comp2272387_c1_seq3	-2.93801	2.46156	46.7522	8.05542e-12	1.41198e-09
comp2232817_c0_seq2	3.52003	3.76246	46.7359	8.12286e-12	1.41902e-09
comp2276806_c0_seq3	3.07799	5.26195	46.571	8.83562e-12	1.53337e-09
comp2272645_c0_seq1	-4.32932	5.2302	46.5709	8.83632e-12	1.53337e-09
comp2246299_c0_seq1	4.01805	1.34582	46.5154	9.09025e-12	1.56812e-09
comp2265722_c0_seq1	-3.12118	2.73952	46.514	9.09683e-12	1.56812e-09
comp2234664_c1_seq2	-2.57281	3.47959	46.4376	9.45831e-12	1.62505e-09
comp2250610_c0_seq2	-4.85693	2.22913	46.3436	9.92325e-12	1.69639e-09
comp2273607_c0_seq2	-4.93377	1.00615	46.3405	9.93869e-12	1.69639e-09
comp2269014_c0_seq1	-3.49458	1.16581	46.3323	9.9803e-12	1.69792e-09
comp2257694_c0_seq1	-3.53117	1.12729	46.2911	1.01925e-11	1.72838e-09
comp2264803_c1_seq1	-3.52422	1.3105	46.2667	1.03202e-11	1.74434e-09
comp2141958_c0_seq2	7.93374	1.53096	46.1323	1.10529e-11	1.86214e-09
comp2277462_c0_seq1	-4.38864	1.7942	46.0475	1.15422e-11	1.93832e-09
comp2253186_c0_seq1	-3.1285	7.12488	46.034	1.16218e-11	1.9454e-09
comp2242307_c0_seq1	4.33625	-0.326251	46.0168	1.17243e-11	1.95627e-09
comp2271225_c0_seq5	-3.44692	10.2875	45.9746	1.19796e-11	1.99247e-09
comp2260377_c0_seq3	2.30833	3.30109	45.9507	1.21267e-11	2.01052e-09
comp2265919_c1_seq23	-3.2382	5.67732	45.8806	1.25682e-11	2.07711e-09
comp2246432_c0_seq1	-4.07018	3.45319	45.8124	1.30135e-11	2.14389e-09
comp2263702_c0_seq1	3.54672	3.30368	45.6854	1.38852e-11	2.27487e-09
comp2275024_c0_seq2	-2.69055	2.56091	45.6839	1.38959e-11	2.27487e-09
comp2270752_c0_seq7	3.90962	3.51447	45.6526	1.41196e-11	2.30424e-09
comp2267792_c0_seq2	-2.77728	5.10143	45.5638	1.47745e-11	2.39876e-09
comp2276389_c0_seq2	-2.36436	4.73998	45.5613	1.47938e-11	2.39876e-09
comp2269151_c0_seq2	3.75176	0.911324	45.5556	1.48371e-11	2.39876e-09
comp2264540_c1_seq15	2.6629	2.8628	45.4557	1.56133e-11	2.51645e-09
comp2276641_c1_seq16	4.99254	7.07767	45.4176	1.592e-11	2.55796e-09
comp2271649_c0_seq1	-4.13197	5.46419	45.3807	1.62223e-11	2.59851e-09
comp2233130_c0_seq1	4.43762	-1.45937	45.374	1.6278e-11	2.59944e-09
comp2214176_c0_seq1	-3.12533	2.06841	45.3363	1.65945e-11	2.64187e-09
gnl|Pdu_trscr_assembly_1|91632	3.64705	3.81958	45.2613	1.72422e-11	2.73625e-09
comp2278595_c0_seq12	-2.69487	5.7879	45.2556	1.72924e-11	2.73625e-09
comp2276940_c0_seq2	-3.25281	5.48673	45.2476	1.73633e-11	2.73861e-09
comp2197826_c0_seq1	2.96961	2.26796	45.2368	1.74594e-11	2.73861e-09
comp2275593_c0_seq1	3.4873	4.67431	45.2361	1.74651e-11	2.73861e-09
comp2253014_c0_seq2	2.0041	7.50481	45.2159	1.76464e-11	2.75872e-09
comp2267067_c0_seq8	-2.65825	4.97656	45.1974	1.78142e-11	2.77662e-09
comp2276609_c1_seq2	-5.15069	1.45749	45.1386	1.83573e-11	2.85273e-09
comp2261071_c0_seq1	3.94957	2.58998	44.787	2.19682e-11	3.40369e-09
comp2241744_c0_seq2	-3.21898	3.23725	44.7616	2.22547e-11	3.43785e-09
comp2279764_c0_seq1	-2.15186	5.99075	44.6319	2.37783e-11	3.66235e-09
comp2278290_c0_seq15	2.64983	6.8947	44.5732	2.45023e-11	3.76273e-09
comp2266655_c1_seq2	-3.34156	1.5346	44.5522	2.47665e-11	3.79212e-09
comp2236155_c0_seq1	3.87754	3.28227	44.5083	2.53281e-11	3.86673e-09
comp2265803_c0_seq1	-4.14712	1.16663	44.4619	2.59356e-11	3.94789e-09
comp2274031_c0_seq3	-2.2324	4.26516	44.4207	2.64872e-11	4.02012e-09
comp2270224_c0_seq1	-2.29883	3.33449	44.3553	2.73864e-11	4.14451e-09
gnl|Pdu_trscr_assembly_1|13616	-3.20065	2.68677	44.319	2.78996e-11	4.20992e-09
comp2260546_c0_seq1	2.93628	2.87622	44.2382	2.90747e-11	4.37456e-09
comp2248059_c0_seq4	-3.38384	4.26024	44.2146	2.94276e-11	4.41491e-09
comp2250615_c0_seq1	7.46962	-0.195257	44.2085	2.95195e-11	4.41597e-09
comp2257281_c0_seq1	-3.35335	2.91377	44.1707	3.00952e-11	4.48919e-09
comp2253679_c0_seq3	-3.41229	5.30311	44.0066	3.27265e-11	4.86774e-09
comp2139590_c0_seq1	2.56397	3.75106	43.9982	3.2868e-11	4.87486e-09
comp2261738_c0_seq5	2.22766	4.528	43.9476	3.37284e-11	4.98825e-09
comp2277416_c0_seq3	-3.83614	7.29419	43.9051	3.44691e-11	5.08336e-09
comp1943186_c0_seq1	-3.73746	2.15155	43.8596	3.52803e-11	5.1883e-09
comp2255868_c0_seq1	3.14453	1.01509	43.8262	3.58861e-11	5.26252e-09
comp2252193_c0_seq2	-3.56623	3.97713	43.8006	3.63599e-11	5.31702e-09
comp2278332_c0_seq1	-2.7219	4.40038	43.753	3.72536e-11	5.43245e-09
comp2276124_c0_seq3	3.0836	6.1381	43.7431	3.74438e-11	5.44493e-09
comp2272098_c0_seq6	-4.4495	2.09217	43.7014	3.82489e-11	5.54652e-09
comp2254406_c0_seq1	-3.25033	2.18623	43.6769	3.87316e-11	5.60091e-09
comp2259229_c0_seq1	4.49648	2.10117	43.6483	3.93021e-11	5.66767e-09
comp2261649_c0_seq2	-3.36672	2.31486	43.5652	4.10065e-11	5.89711e-09
comp2236891_c0_seq1	-2.70267	2.80554	43.5191	4.19839e-11	6.02105e-09
comp2267077_c0_seq2	-2.47743	4.39685	43.5094	4.21933e-11	6.03445e-09
comp2213506_c0_seq1	-3.28036	2.90297	43.4368	4.37865e-11	6.24516e-09
comp2277808_c1_seq1	-3.8598	2.02194	43.3737	4.52216e-11	6.43222e-09
comp2266847_c0_seq1	-3.61828	5.40858	43.3641	4.54439e-11	6.44623e-09
comp2269659_c0_seq1	2.6566	3.23897	43.3575	4.5599e-11	6.45065e-09
comp2254383_c0_seq1	-3.30586	6.97749	43.339	4.60309e-11	6.4941e-09
comp2274390_c0_seq1	-2.36058	3.13446	43.3156	4.65846e-11	6.55445e-09
comp2273485_c0_seq5	2.41433	5.34253	43.2806	4.74271e-11	6.65501e-09
comp2272124_c0_seq1	-2.76634	6.1214	43.2254	4.87838e-11	6.82697e-09
comp2245338_c0_seq1	-8.77342	-0.378219	43.1585	5.0481e-11	7.04555e-09
comp2275350_c0_seq1	2.14876	5.58779	43.1445	5.08421e-11	7.07697e-09
comp2245203_c0_seq1	3.86626	1.61442	43.044	5.3523e-11	7.43027e-09
comp2254433_c0_seq1	-4.17662	3.01064	43.0281	5.39582e-11	7.47077e-09
comp1194044_c0_seq1	-2.81792	2.03042	42.9734	5.54886e-11	7.66229e-09
gnl|Pdu_trscr_assembly_1|219156	-4.16926	6.37632	42.9433	5.63497e-11	7.76061e-09
comp2257310_c0_seq1	-3.60109	1.28203	42.8895	5.79202e-11	7.95585e-09
comp2271179_c1_seq1	-3.83007	2.41816	42.7545	6.20579e-11	8.50176e-09
comp2256548_c0_seq1	3.91578	-0.310751	42.4767	7.15287e-11	9.77352e-09
comp2257239_c0_seq2	-3.05543	3.30363	42.4625	7.20514e-11	9.81917e-09
comp2266442_c0_seq5	-4.37024	1.46981	42.3762	7.53023e-11	1.02354e-08
comp2273171_c1_seq1	-3.14064	1.98424	42.3588	7.59727e-11	1.02996e-08
comp2273202_c0_seq1	4.24175	-0.0135399	42.3537	7.61725e-11	1.02999e-08
comp2270156_c0_seq11	-2.5057	6.53881	42.3362	7.68575e-11	1.03656e-08
gnl|Pdu_trscr_assembly_1|7284	3.90169	2.90123	42.3229	7.73803e-11	1.04091e-08
comp2273445_c0_seq4	3.53736	0.938173	42.2867	7.88257e-11	1.05763e-08
comp2274596_c1_seq6	-2.49374	3.21942	42.1124	8.61734e-11	1.15324e-08
comp2259694_c0_seq2	-3.78267	1.78892	42.0992	8.67566e-11	1.15807e-08
comp2229342_c0_seq1	4.14676	-1.5936	41.9408	9.40794e-11	1.2526e-08
gnl|Pdu_trscr_assembly_1|16743	-4.10043	1.79146	41.9343	9.43899e-11	1.25353e-08
comp2269790_c0_seq1	-2.60655	3.08814	41.8642	9.78368e-11	1.296e-08
comp2273939_c0_seq1	3.05462	2.47215	41.796	1.01312e-10	1.33863e-08
comp2273103_c0_seq8	-2.58819	4.14363	41.6888	1.07019e-10	1.41046e-08
comp2276838_c1_seq1	-1.93997	5.48347	41.677	1.07669e-10	1.41544e-08
comp2275883_c1_seq1	2.79617	4.6496	41.6593	1.08648e-10	1.42472e-08
comp2259006_c0_seq2	-2.63644	3.6246	41.5863	1.12779e-10	1.47517e-08
comp2279447_c0_seq1	6.12886	1.03312	41.4506	1.20887e-10	1.57726e-08
comp2138964_c0_seq1	-2.88335	2.68808	41.4267	1.22376e-10	1.59269e-08
comp2278252_c0_seq1	-2.29295	5.57575	41.4024	1.23908e-10	1.60861e-08
comp2216809_c0_seq2	-4.18485	0.811186	41.3882	1.24807e-10	1.61625e-08
comp2225064_c0_seq1	3.02153	2.41304	41.3251	1.28906e-10	1.66518e-08
comp2270954_c0_seq2	-2.95181	3.32307	41.2926	1.31064e-10	1.68888e-08
comp2259280_c0_seq3	4.71329	0.945067	41.266	1.32858e-10	1.70777e-08
comp2276230_c0_seq1	-2.87802	3.25676	41.1994	1.37463e-10	1.76261e-08
comp2260860_c0_seq2	-2.5056	4.58786	41.1596	1.4029e-10	1.79444e-08
comp2256206_c0_seq2	5.54109	-1.37727	41.1417	1.4158e-10	1.80649e-08
comp2256831_c0_seq1	-3.09421	3.66835	41.0353	1.49501e-10	1.90291e-08
comp2193521_c0_seq1	-5.96982	-0.0715603	41.0237	1.50391e-10	1.90956e-08
comp2276293_c1_seq2	-2.89959	5.3506	40.913	1.59157e-10	2.01596e-08
comp2278420_c1_seq3	3.89643	5.61753	40.89	1.61046e-10	2.03493e-08
comp2263896_c0_seq3	2.62706	4.69396	40.8539	1.64046e-10	2.06739e-08
comp2142794_c0_seq1	-3.23611	5.13007	40.8496	1.64409e-10	2.06739e-08
comp2139506_c0_seq1	3.83744	2.57736	40.843	1.64966e-10	2.06939e-08
comp2261716_c0_seq2	-2.4802	6.90744	40.8073	1.68006e-10	2.10245e-08
comp2278583_c0_seq1	-2.12119	4.27026	40.7899	1.69509e-10	2.11618e-08
comp2016072_c0_seq1	-3.68241	1.88014	40.7798	1.70384e-10	2.12201e-08
comp2270986_c0_seq3	3.75612	0.599684	40.6202	1.84889e-10	2.29717e-08
comp2275017_c0_seq4	3.41464	3.17281	40.599	1.86901e-10	2.31664e-08
comp2268858_c0_seq10	-2.03162	5.45915	40.5616	1.90512e-10	2.35578e-08
comp2246233_c0_seq2	-2.77886	4.11617	40.5474	1.91907e-10	2.36742e-08
comp2259561_c0_seq1	-4.49065	0.0744501	40.4607	2.00612e-10	2.46895e-08
comp2278592_c0_seq3	-2.36821	3.50434	40.4016	2.0677e-10	2.53873e-08
comp2270043_c0_seq2	-4.36849	0.573393	40.3769	2.09399e-10	2.56497e-08
comp2276904_c0_seq6	3.27423	4.31562	40.2243	2.2641e-10	2.76683e-08
comp2253348_c0_seq1	4.08733	-0.0712663	40.083	2.43395e-10	2.96742e-08
comp2267868_c0_seq12	-3.44663	1.69862	40.0167	2.51801e-10	3.06274e-08
comp2241541_c0_seq2	-1.96505	5.20365	39.9157	2.65167e-10	3.21779e-08
comp2240347_c0_seq3	3.5904	2.16656	39.8984	2.67529e-10	3.23891e-08
comp2264429_c0_seq2	3.09751	1.07649	39.8629	2.72425e-10	3.29053e-08
comp2278291_c0_seq2	3.45072	1.45642	39.8569	2.73268e-10	3.29307e-08
comp2268302_c0_seq1	5.46532	5.94579	39.8414	2.75441e-10	3.31159e-08
comp2274248_c0_seq12	4.33537	2.27926	39.8171	2.78887e-10	3.3453e-08
comp2221435_c0_seq3	-3.09739	4.70859	39.7299	2.91621e-10	3.49e-08
comp2249062_c0_seq1	-2.54941	5.23627	39.6257	3.07614e-10	3.67296e-08
comp2274736_c0_seq12	6.10856	2.19721	39.5614	3.17901e-10	3.78641e-08
comp2278373_c0_seq1	-2.77982	6.2775	39.5537	3.19162e-10	3.78641e-08
comp2270372_c0_seq1	2.32879	5.13068	39.5529	3.19298e-10	3.78641e-08
comp2251338_c0_seq8	-3.37739	2.15876	39.4399	3.38317e-10	4.00283e-08
comp2271992_c0_seq4	3.80511	3.21525	39.4255	3.40815e-10	4.02324e-08
comp2270443_c0_seq7	-3.47039	2.66591	39.4117	3.43229e-10	4.04257e-08
comp2272091_c0_seq2	-2.58547	3.98223	39.3323	3.5748e-10	4.20091e-08
comp2270061_c0_seq1	3.64114	1.79939	39.3243	3.58951e-10	4.2087e-08
comp2250283_c0_seq1	5.53173	-0.864642	39.311	3.61392e-10	4.22384e-08
comp2270871_c1_seq12	-3.32433	5.34003	39.3085	3.61865e-10	4.22384e-08
comp2205034_c0_seq1	-5.14362	1.89726	39.2339	3.75948e-10	4.3784e-08
comp2244623_c0_seq1	-3.8691	1.16668	39.1779	3.86904e-10	4.49594e-08
comp2278062_c0_seq4	4.66266	6.68861	39.0908	4.04538e-10	4.69039e-08
comp2257274_c0_seq1	-3.03289	1.84958	39.0118	4.21253e-10	4.87333e-08
comp2254377_c0_seq1	5.25528	-0.643742	38.9471	4.35447e-10	5.02637e-08
comp2276865_c1_seq1	2.59645	2.61963	38.8844	4.49661e-10	5.17897e-08
gnl|Pdu_trscr_assembly_1|15590	-4.38691	5.68301	38.8606	4.55173e-10	5.23087e-08
comp2270473_c0_seq2	3.09108	3.90098	38.8423	4.59472e-10	5.26865e-08
comp2271317_c1_seq3	3.10881	3.11978	38.7937	4.71039e-10	5.38941e-08
comp2244379_c0_seq1	6.7727	-1.62984	38.7883	4.72341e-10	5.39246e-08
comp2253194_c0_seq3	3.83405	-0.788813	38.7452	4.82892e-10	5.50085e-08
comp2266805_c1_seq1	-2.90009	1.55528	38.569	5.28504e-10	5.99704e-08
comp2275488_c0_seq1	1.98498	4.73891	38.5681	5.28754e-10	5.99704e-08
comp2277610_c0_seq1	3.41216	3.37637	38.5533	5.32797e-10	6.02976e-08
comp2262029_c0_seq1	-5.1835	0.271098	38.5152	5.43299e-10	6.13527e-08
gnl|Pdu_trscr_assembly_1|1902	2.67802	4.78533	38.4647	5.57544e-10	6.2825e-08
comp2267157_c0_seq3	3.957	3.62802	38.4405	5.64487e-10	6.347e-08
comp2236259_c0_seq1	-2.35586	9.56399	38.4082	5.73895e-10	6.43887e-08
comp2244199_c0_seq1	-2.44118	3.52187	38.3936	5.78223e-10	6.47348e-08
comp2261993_c0_seq1	-2.06086	7.5215	38.3811	5.81924e-10	6.50094e-08
comp2201258_c0_seq1	3.70765	-0.167625	38.3694	5.8543e-10	6.51584e-08
comp2275241_c0_seq5	-2.91678	3.60307	38.3683	5.85761e-10	6.51584e-08
comp2261787_c0_seq1	3.04525	2.34648	38.3558	5.89536e-10	6.54385e-08
gnl|Pdu_trscr_assembly_1|18304	-4.29198	1.75382	38.3423	5.9361e-10	6.57505e-08
comp2276588_c0_seq4	-2.54978	2.73362	38.2926	6.08927e-10	6.73039e-08
comp2275646_c0_seq3	-2.01373	3.85344	38.2688	6.16407e-10	6.79863e-08
comp2258266_c0_seq1	2.74035	2.23111	38.2156	6.33428e-10	6.97159e-08
comp2251791_c0_seq2	-3.72836	3.61929	38.1932	6.40738e-10	7.03717e-08
comp2273792_c0_seq1	3.24209	3.35037	38.1801	6.4508e-10	7.06995e-08
comp2272270_c0_seq1	3.62643	-0.0475859	38.1696	6.48543e-10	7.09296e-08
comp2265580_c1_seq5	-3.03351	2.15048	38.1548	6.53497e-10	7.13216e-08
comp2259017_c0_seq2	-2.22196	3.47062	38.1473	6.56009e-10	7.14147e-08
comp2268972_c0_seq3	3.0954	3.00943	38.1441	6.57094e-10	7.14147e-08
comp2259757_c0_seq3	4.95852	0.0647173	38.1175	6.66114e-10	7.22442e-08
comp2268582_c0_seq4	-3.07646	1.48786	38.0836	6.77771e-10	7.33557e-08
comp2271349_c0_seq1	-2.63856	4.90137	37.9992	7.07724e-10	7.64386e-08
comp2142646_c0_seq4	-3.803	9.36324	37.8939	7.46969e-10	8.05102e-08
comp2279736_c0_seq1	-2.2679	5.24792	37.7776	7.92857e-10	8.52796e-08
comp2239692_c0_seq1	-3.78859	1.24283	37.7669	7.9725e-10	8.55753e-08
comp2197371_c0_seq1	6.40672	-0.644088	37.7108	8.20509e-10	8.78907e-08
comp2265966_c0_seq2	3.2203	3.22923	37.7048	8.23002e-10	8.79767e-08
comp2278597_c0_seq3	-2.60831	5.44091	37.6799	8.33606e-10	8.89276e-08
comp2261491_c0_seq1	-3.46445	6.62163	37.6626	8.41029e-10	8.9536e-08
comp2278436_c0_seq3	-2.01018	6.38011	37.6469	8.47816e-10	9.00744e-08
comp2250174_c0_seq1	3.05089	3.14181	37.6401	8.50758e-10	9.02028e-08
comp1984701_c0_seq1	-2.02009	5.49228	37.5983	8.69205e-10	9.19715e-08
comp2278017_c0_seq2	-2.48479	3.13675	37.5796	8.77564e-10	9.26676e-08
comp2253516_c0_seq4	-2.47901	11.4268	37.5145	9.07374e-10	9.56214e-08
comp2265656_c0_seq3	-2.81933	6.93709	37.5054	9.1159e-10	9.58716e-08
comp2251106_c0_seq1	-3.7399	9.33986	37.479	9.24012e-10	9.69821e-08
comp2260027_c0_seq1	2.89449	2.5119	37.4345	9.45349e-10	9.9022e-08
comp2277723_c2_seq1	-3.3024	3.574	37.4238	9.50566e-10	9.93685e-08
comp2252790_c0_seq1	-3.81742	7.0575	37.3813	9.71516e-10	1.01355e-07
comp2261079_c0_seq1	-4.07805	5.35207	37.3445	9.90007e-10	1.03078e-07
comp2276867_c0_seq11	2.5994	4.3587	37.3028	1.0114e-09	1.05095e-07
comp2270884_c0_seq1	-4.29621	1.08518	37.2947	1.0156e-09	1.05321e-07
comp2277510_c3_seq1	-2.37105	2.4824	37.2385	1.04529e-09	1.08184e-07
comp2257591_c0_seq1	4.33369	0.95007	37.172	1.08157e-09	1.1162e-07
comp2272502_c0_seq1	2.81775	5.48789	37.1698	1.08277e-09	1.1162e-07
comp2272761_c1_seq3	-3.51838	4.45366	37.1403	1.0993e-09	1.13099e-07
comp2277430_c0_seq5	-2.99804	2.52604	37.0702	1.13952e-09	1.17007e-07
comp2252902_c0_seq1	4.42307	-0.616181	37.0138	1.17297e-09	1.20204e-07
comp2263172_c0_seq5	2.08296	3.58488	36.9698	1.19972e-09	1.22703e-07
comp2248121_c0_seq5	4.64553	-1.83184	36.9416	1.21723e-09	1.2425e-07
comp2275110_c1_seq5	2.84651	9.6206	36.8322	1.28749e-09	1.31166e-07
comp2259973_c0_seq2	-2.46147	2.8497	36.7997	1.30908e-09	1.33105e-07
comp2264517_c0_seq6	2.45004	2.34486	36.7462	1.3455e-09	1.3654e-07
comp2267710_c0_seq1	-6.91187	1.40519	36.7272	1.35871e-09	1.37613e-07
comp2265840_c0_seq3	3.51812	1.68631	36.6925	1.38311e-09	1.39813e-07
comp2241874_c0_seq1	3.03416	1.84811	36.6198	1.43568e-09	1.44845e-07
comp2255734_c1_seq9	-3.62283	2.38625	36.5572	1.48255e-09	1.49284e-07
comp2220394_c0_seq1	-2.81414	4.99927	36.5238	1.50812e-09	1.51566e-07
comp2278398_c1_seq3	-5.14735	0.755944	36.505	1.52271e-09	1.52499e-07
comp1193769_c0_seq1	-3.51965	3.91694	36.5044	1.52326e-09	1.52499e-07
gnl|Pdu_trscr_assembly_1|1117	-2.59246	3.82715	36.4005	1.60658e-09	1.60532e-07
comp2263921_c0_seq2	-2.08755	6.55875	36.2817	1.70762e-09	1.703e-07
comp2268249_c0_seq4	-4.18614	1.44894	36.2699	1.71793e-09	1.71001e-07
comp2270604_c0_seq3	-2.08892	6.97882	36.193	1.78708e-09	1.77545e-07
comp2247991_c0_seq1	-2.54011	2.92085	36.1609	1.81679e-09	1.80153e-07
comp2276273_c0_seq7	-2.31111	4.8469	36.114	1.86104e-09	1.84175e-07
comp2253491_c1_seq2	-3.84016	0.990533	36.1105	1.86443e-09	1.84175e-07
comp2272887_c1_seq2	3.24936	4.01103	36.1047	1.86992e-09	1.84368e-07
comp2277331_c0_seq3	2.50126	4.64424	36.0852	1.88872e-09	1.85869e-07
comp2275107_c0_seq4	-2.72488	6.66344	36.0706	1.90301e-09	1.86922e-07
comp2270081_c0_seq3	2.54976	3.22158	36.0109	1.96216e-09	1.9237e-07
comp2277282_c0_seq11	3.07918	9.32057	35.9793	1.9942e-09	1.95143e-07
comp2261623_c0_seq1	-3.78297	11.1304	35.9723	2.00139e-09	1.9548e-07
comp2267437_c1_seq1	-2.33807	5.25709	35.9532	2.02115e-09	1.97039e-07
comp2221211_c0_seq1	-3.34137	4.54876	35.9457	2.02889e-09	1.97424e-07
comp2266208_c1_seq3	-2.69969	1.99294	35.9248	2.05081e-09	1.99184e-07
comp2261881_c0_seq2	-2.114	3.35353	35.8948	2.08262e-09	2.01898e-07
comp2263543_c0_seq5	3.02721	2.42011	35.8453	2.13621e-09	2.06708e-07
comp2246491_c0_seq2	-2.71778	2.79981	35.8282	2.15506e-09	2.08145e-07
comp2262129_c0_seq3	3.09385	2.83693	35.769	2.22149e-09	2.14164e-07
comp2273169_c2_seq2	2.47642	5.60753	35.6159	2.40315e-09	2.31249e-07
comp2140166_c0_seq1	1.77081	5.74111	35.6094	2.41127e-09	2.31602e-07
comp1315948_c0_seq1	3.87074	3.4043	35.5871	2.43897e-09	2.33831e-07
comp2220459_c0_seq1	-5.26352	0.331032	35.5715	2.45854e-09	2.35274e-07
comp2271913_c0_seq11	-2.5268	5.42741	35.5443	2.49314e-09	2.37713e-07
comp2244052_c0_seq1	6.65187	-2.13766	35.5443	2.49316e-09	2.37713e-07
comp2260778_c0_seq1	4.13204	4.28298	35.5251	2.51783e-09	2.39627e-07
comp2127369_c0_seq1	-3.21974	1.71585	35.4979	2.55321e-09	2.42551e-07
comp2254003_c0_seq1	3.63394	1.14038	35.4209	2.65622e-09	2.51877e-07
comp2245053_c0_seq1	-3.86747	2.05707	35.3984	2.68711e-09	2.54342e-07
comp1174362_c0_seq1	3.85579	0.862126	35.347	2.75888e-09	2.60661e-07
gnl|Pdu_trscr_assembly_1|212085	4.14714	-0.467361	35.3292	2.78425e-09	2.62582e-07
comp2243479_c0_seq1	4.17189	-0.226155	35.3039	2.82072e-09	2.6554e-07
comp2256318_c0_seq1	-4.28623	2.13001	35.2887	2.84278e-09	2.66823e-07
comp2269145_c1_seq1	-3.60019	2.47763	35.2874	2.8446e-09	2.66823e-07
comp2266986_c2_seq3	-6.26321	0.839912	35.207	2.96452e-09	2.77572e-07
comp2271648_c0_seq1	-3.3343	1.9138	35.1928	2.98628e-09	2.79107e-07
comp2262932_c1_seq1	-2.34821	2.26637	35.112	3.1127e-09	2.90402e-07
comp2248557_c0_seq1	4.32883	-0.272561	35.108	3.1191e-09	2.90478e-07
comp2207445_c0_seq1	-7.98218	-0.434221	35.0999	3.13224e-09	2.91181e-07
comp2276461_c0_seq7	-2.91918	3.89542	35.0481	3.21669e-09	2.98498e-07
comp2278475_c0_seq14	1.76761	6.57081	34.9985	3.29959e-09	3.05647e-07
comp2275926_c0_seq2	-2.61322	3.81679	34.9542	3.37553e-09	3.12125e-07
comp2272168_c0_seq4	-2.38634	4.35791	34.934	3.41067e-09	3.14815e-07
comp2272070_c1_seq2	-2.24236	3.57512	34.9267	3.42362e-09	3.15452e-07
comp2262465_c0_seq5	-5.54273	4.99094	34.8752	3.51535e-09	3.23332e-07
comp2278168_c0_seq13	-2.04756	3.46355	34.8144	3.62689e-09	3.32608e-07
comp2239691_c0_seq1	-3.1773	8.78764	34.8132	3.62899e-09	3.32608e-07
comp2277656_c1_seq1	-3.5814	3.41526	34.7829	3.68588e-09	3.37229e-07
comp1195529_c0_seq1	3.94496	0.695284	34.778	3.69533e-09	3.37501e-07
comp2278120_c2_seq1	-3.32739	5.4149	34.7565	3.73631e-09	3.4043e-07
comp2267412_c0_seq1	-4.09244	0.863279	34.7543	3.74049e-09	3.4043e-07
comp2220452_c1_seq1	-3.41557	3.28493	34.7323	3.78311e-09	3.43708e-07
comp2274947_c0_seq3	-2.53768	2.80569	34.6661	3.91383e-09	3.54521e-07
comp2271994_c0_seq2	-2.58411	12.3311	34.6652	3.91574e-09	3.54521e-07
comp2277723_c0_seq7	-3.30948	3.35968	34.6544	3.93747e-09	3.55869e-07
comp2271608_c1_seq1	2.47734	2.24301	34.6424	3.96192e-09	3.57458e-07
comp2262340_c0_seq2	4.83852	-0.222197	34.57	4.11198e-09	3.70356e-07
comp2248027_c0_seq1	-3.40358	1.97515	34.5376	4.18106e-09	3.75927e-07
comp2184756_c0_seq1	5.79079	-1.23522	34.5294	4.19858e-09	3.76852e-07
comp2266781_c0_seq2	-4.20436	2.62809	34.4694	4.33013e-09	3.8799e-07
comp2249204_c0_seq1	-3.02212	2.27554	34.4461	4.38221e-09	3.91982e-07
comp2278021_c0_seq3	-2.13502	6.47451	34.4366	4.40365e-09	3.93224e-07
comp2265341_c0_seq2	-3.5507	0.476588	34.4281	4.42292e-09	3.94268e-07
comp2252899_c0_seq1	2.06424	4.77644	34.4246	4.43087e-09	3.94302e-07
comp2264984_c0_seq1	-2.8876	2.92059	34.415	4.45276e-09	3.95574e-07
comp2261996_c0_seq2	-3.56328	3.71347	34.3723	4.55159e-09	4.03664e-07
comp2271893_c0_seq3	-2.68883	2.86956	34.3392	4.62955e-09	4.09881e-07
comp2268383_c0_seq1	4.45984	-0.647984	34.3262	4.66062e-09	4.11931e-07
comp2258113_c0_seq1	-2.03168	4.09775	34.3039	4.7144e-09	4.15873e-07
comp2266735_c0_seq5	-2.88347	3.09679	34.3008	4.72189e-09	4.15873e-07
comp2221608_c0_seq2	-3.33484	0.0774084	34.2978	4.72918e-09	4.15873e-07
comp2208952_c0_seq1	-2.47616	1.89695	34.2309	4.89453e-09	4.29687e-07
comp2258211_c0_seq1	4.27134	-0.839293	34.2158	4.93279e-09	4.32317e-07
comp1194190_c0_seq1	-2.16188	2.60845	34.2111	4.94448e-09	4.32613e-07
gnl|Pdu_trscr_assembly_1|1332	-1.92441	5.76728	34.1918	4.99383e-09	4.36198e-07
comp2274177_c0_seq1	-2.81019	5.88149	34.1841	5.01361e-09	4.37192e-07
comp2253273_c0_seq1	-3.07585	3.45994	34.1644	5.06469e-09	4.40548e-07
comp2267193_c0_seq1	4.05692	0.430503	34.1627	5.06903e-09	4.40548e-07
comp2257653_c0_seq2	-3.20922	1.73993	34.0584	5.34825e-09	4.64041e-07
comp2236375_c0_seq1	-3.18237	2.62415	34.0422	5.39308e-09	4.67152e-07
comp2264585_c0_seq1	2.65588	0.102047	33.9578	5.63195e-09	4.87033e-07
comp2265014_c0_seq1	2.84289	4.64452	33.9493	5.65669e-09	4.88077e-07
comp2269333_c0_seq9	-2.48766	2.85183	33.9472	5.66278e-09	4.88077e-07
comp2273154_c0_seq3	2.3885	3.32437	33.9256	5.72615e-09	4.92218e-07
comp2274295_c0_seq2	-2.6426	6.81572	33.9243	5.72973e-09	4.92218e-07
comp2254631_c0_seq1	2.53935	7.13004	33.9152	5.75683e-09	4.93731e-07
comp2256950_c0_seq1	-5.57895	-0.130806	33.8742	5.87936e-09	5.0341e-07
comp2271101_c0_seq1	2.06095	4.57193	33.8473	5.96132e-09	5.0959e-07
comp2258728_c0_seq2	-2.69052	1.79329	33.8059	6.08928e-09	5.19675e-07
comp2275022_c0_seq1	2.12341	6.9202	33.7255	6.34619e-09	5.40714e-07
comp2263577_c0_seq1	-2.16352	4.19682	33.6573	6.57263e-09	5.58866e-07
comp2270281_c0_seq1	-2.62221	2.06514	33.655	6.58071e-09	5.58866e-07
comp2276258_c0_seq2	-1.86681	7.12998	33.5754	6.85556e-09	5.8126e-07
comp2269277_c0_seq3	-2.62411	7.21786	33.5088	7.09422e-09	5.99964e-07
comp2258180_c0_seq1	3.64111	0.59395	33.5067	7.10189e-09	5.99964e-07
comp2269547_c0_seq1	2.0307	4.65054	33.5043	7.11073e-09	5.99964e-07
comp2258643_c0_seq1	2.33694	1.30874	33.4327	7.37735e-09	6.21453e-07
comp2269539_c0_seq1	-4.40849	1.07563	33.4175	7.4352e-09	6.25314e-07
gnl|Pdu_trscr_assembly_1|760	2.32027	3.02978	33.3882	7.54818e-09	6.33791e-07
comp2277927_c4_seq1	-2.91435	2.65103	33.3698	7.61967e-09	6.38764e-07
comp1198086_c0_seq1	2.96756	2.51148	33.355	7.67784e-09	6.42605e-07
comp2277022_c0_seq15	2.57861	2.96924	33.3484	7.70428e-09	6.43784e-07
comp1985114_c0_seq1	-2.26315	3.32587	33.3376	7.74702e-09	6.45704e-07
comp2269326_c0_seq2	-1.67947	5.77206	33.3363	7.75208e-09	6.45704e-07
comp2244718_c0_seq4	-3.72254	0.164129	33.3281	7.78489e-09	6.47402e-07
comp2274611_c0_seq1	2.90818	2.13899	33.3225	7.80744e-09	6.48242e-07
comp2275669_c0_seq15	-2.13559	3.72362	33.3102	7.85684e-09	6.51305e-07
comp2266416_c0_seq4	-2.72591	1.62058	33.2703	8.0199e-09	6.63765e-07
comp2272691_c0_seq4	-2.98208	11.4286	33.2624	8.05232e-09	6.6539e-07
comp2277114_c0_seq12	2.12133	5.20736	33.1637	8.47181e-09	6.98944e-07
comp2276609_c0_seq2	-1.91387	4.09591	33.1205	8.66196e-09	7.13502e-07
comp2274308_c0_seq1	-3.48133	2.87435	33.1078	8.7189e-09	7.17057e-07
comp2266139_c1_seq2	-2.90711	2.13172	33.0971	8.76695e-09	7.1965e-07
comp2240069_c0_seq1	2.40405	4.09357	33.0946	8.77807e-09	7.1965e-07
gnl|Pdu_trscr_assembly_1|9334	-2.20931	7.17708	33.0464	8.99877e-09	7.35356e-07
comp2264227_c0_seq2	2.93945	0.342448	33.0447	9.00648e-09	7.35356e-07
comp2277005_c0_seq3	3.27394	4.47537	33.0435	9.01203e-09	7.35356e-07
comp2271837_c0_seq3	2.51462	2.09249	33.0047	9.19371e-09	7.49007e-07
gnl|Pdu_trscr_assembly_1|86887	2.51443	6.40276	32.9881	9.27269e-09	7.54261e-07
comp2265764_c0_seq1	-3.24409	0.953784	32.9459	9.47593e-09	7.6959e-07
comp2275312_c0_seq8	-3.66224	9.55449	32.9169	9.61811e-09	7.79921e-07
comp2272658_c2_seq1	-4.37804	0.584473	32.8558	9.9255e-09	8.03595e-07
comp2270868_c0_seq2	-4.82686	3.09166	32.8042	1.01926e-08	8.2394e-07
comp2263828_c0_seq2	-5.15663	1.21971	32.7773	1.03345e-08	8.34118e-07
comp2277034_c0_seq10	2.2316	3.37898	32.7538	1.04603e-08	8.42957e-07
comp2271953_c0_seq4	-1.61405	5.20942	32.7498	1.04818e-08	8.43391e-07
comp2259637_c0_seq1	-3.89906	0.171395	32.7455	1.05047e-08	8.43491e-07
comp2247091_c1_seq1	-4.8524	2.41532	32.7435	1.05155e-08	8.43491e-07
comp2264626_c0_seq3	1.79117	2.81185	32.7095	1.07013e-08	8.57074e-07
comp2221142_c0_seq1	-3.12398	6.34025	32.7047	1.07275e-08	8.57855e-07
comp2270227_c0_seq1	-2.29807	4.73472	32.6465	1.1054e-08	8.82606e-07
comp2267074_c0_seq1	-2.67299	2.70382	32.637	1.1108e-08	8.85079e-07
comp2259310_c0_seq2	5.13432	-0.649431	32.6351	1.1119e-08	8.85079e-07
comp2261228_c0_seq1	-2.61954	2.68582	32.6135	1.12429e-08	8.91881e-07
comp2266660_c0_seq2	4.19125	-0.845585	32.6124	1.12495e-08	8.91881e-07
comp2276343_c0_seq1	-1.89297	5.40668	32.6095	1.12665e-08	8.91881e-07
comp2275732_c0_seq3	2.95458	2.17021	32.6084	1.12729e-08	8.91881e-07
comp2263282_c0_seq2	2.92376	2.61831	32.5983	1.13317e-08	8.95166e-07
comp2276171_c4_seq1	-2.33995	3.69469	32.5842	1.14138e-08	9.00289e-07
comp2276257_c2_seq1	2.97844	1.12071	32.5796	1.14408e-08	9.0105e-07
comp2277206_c0_seq1	-2.68526	6.33662	32.537	1.16944e-08	9.19637e-07
comp2259227_c0_seq1	-2.21621	7.31625	32.5149	1.1828e-08	9.28739e-07
comp2142776_c0_seq1	-3.69045	0.31085	32.5089	1.18647e-08	9.30218e-07
comp2270739_c0_seq1	2.13906	4.6244	32.4018	1.25371e-08	9.8146e-07
comp2275800_c0_seq2	-2.33183	6.32364	32.3669	1.27643e-08	9.9774e-07
comp2199263_c0_seq2	-2.87058	5.73415	32.2948	1.32467e-08	1.0339e-06
comp2268968_c0_seq3	-1.95347	2.93438	32.205	1.38734e-08	1.08119e-06
comp2245797_c0_seq4	-8.4849	0.434743	32.1957	1.39399e-08	1.08475e-06
comp2257668_c0_seq1	3.71349	-0.638354	32.1616	1.41867e-08	1.1023e-06
comp2264068_c0_seq1	-1.98378	3.99642	32.147	1.42939e-08	1.1083e-06
comp2254382_c0_seq1	-3.87115	0.748475	32.1453	1.43064e-08	1.1083e-06
comp2254637_c0_seq1	-2.89488	1.98989	32.1336	1.43927e-08	1.1127e-06
comp2272257_c1_seq3	-1.76377	6.39	32.1318	1.4406e-08	1.1127e-06
comp2270870_c0_seq1	-2.41815	3.79268	32.076	1.48254e-08	1.1434e-06
comp2273767_c0_seq1	-2.20495	3.58079	32.0506	1.50212e-08	1.15679e-06
comp2258209_c0_seq1	1.68327	4.26809	32.0293	1.51864e-08	1.16778e-06
comp2245788_c0_seq1	-2.60665	2.31079	32.0228	1.52376e-08	1.16999e-06
comp2263586_c0_seq1	1.99608	3.87303	32.0126	1.53174e-08	1.1725e-06
comp2267797_c1_seq1	-2.84636	1.99759	32.0098	1.53398e-08	1.1725e-06
comp2200430_c0_seq3	-2.18461	3.0783	32.0081	1.5353e-08	1.1725e-06
comp2257556_c0_seq4	-2.98427	2.99086	32.0072	1.53604e-08	1.1725e-06
comp2265599_c0_seq1	2.76002	2.5265	31.9893	1.55023e-08	1.1816e-06
comp2250674_c0_seq3	-2.538	1.58025	31.9857	1.5531e-08	1.18206e-06
comp2237006_c0_seq2	-5.81131	1.12094	31.9679	1.56738e-08	1.19119e-06
comp2261237_c0_seq1	-3.60136	2.43634	31.9227	1.60435e-08	1.21751e-06
comp2274043_c0_seq7	-2.84283	5.40673	31.9188	1.60751e-08	1.21813e-06
comp2240407_c0_seq1	-2.48583	5.56615	31.8997	1.62339e-08	1.22595e-06
comp2263803_c0_seq1	-3.29246	6.01088	31.8996	1.62354e-08	1.22595e-06
comp1196706_c0_seq1	-1.8351	6.15122	31.8979	1.62489e-08	1.22595e-06
comp2232388_c0_seq1	-3.2413	1.1406	31.887	1.63406e-08	1.23108e-06
comp2273169_c1_seq1	2.57185	2.63844	31.8498	1.66568e-08	1.25309e-06
comp2262122_c0_seq14	4.43925	-0.206446	31.8138	1.6968e-08	1.27465e-06
comp2267951_c0_seq1	2.75194	5.99485	31.8084	1.70157e-08	1.2764e-06
comp2272751_c0_seq7	-2.24838	2.42153	31.7244	1.77676e-08	1.33058e-06
comp2261998_c0_seq2	-2.79931	3.43868	31.7221	1.77891e-08	1.33058e-06
comp2276447_c2_seq8	-1.8777	6.13254	31.7078	1.792e-08	1.33844e-06
comp2268999_c0_seq1	2.23008	4.37636	31.6678	1.82927e-08	1.36433e-06
comp2277818_c0_seq4	2.44229	4.65481	31.6545	1.84187e-08	1.37176e-06
comp2235322_c0_seq1	-3.39989	2.43426	31.6097	1.88489e-08	1.40179e-06
comp2273729_c0_seq3	3.36758	0.954869	31.5699	1.92384e-08	1.42872e-06
comp2253924_c0_seq2	2.97948	4.58913	31.5314	1.96243e-08	1.4553e-06
comp2254316_c0_seq1	-5.441	1.85977	31.5223	1.9716e-08	1.46002e-06
comp2266989_c0_seq3	-2.15887	4.02619	31.4667	2.0289e-08	1.50032e-06
comp2279527_c0_seq1	3.2662	3.28452	31.4568	2.03923e-08	1.50582e-06
comp2269425_c0_seq2	3.13675	2.37313	31.4467	2.04986e-08	1.51153e-06
comp2262901_c0_seq1	1.71291	4.10714	31.444	2.05281e-08	1.51156e-06
comp2259529_c0_seq1	-2.34531	5.86214	31.4201	2.07819e-08	1.52809e-06
comp2139772_c0_seq1	-3.50352	3.11856	31.3712	2.1312e-08	1.56486e-06
comp2272887_c0_seq5	2.57542	2.05849	31.3512	2.1533e-08	1.57885e-06
comp2278219_c1_seq2	2.22693	6.86195	31.3432	2.16215e-08	1.58312e-06
comp2271417_c0_seq5	2.13715	2.81633	31.2859	2.22688e-08	1.62822e-06
comp2272968_c0_seq3	-4.05701	1.55246	31.2455	2.27375e-08	1.66016e-06
comp2239091_c1_seq1	-5.27205	0.522438	31.2381	2.28239e-08	1.66413e-06
comp2258014_c0_seq1	-1.88201	6.51269	31.2204	2.3033e-08	1.67703e-06
comp2265568_c0_seq2	3.59615	0.128535	31.2002	2.32738e-08	1.69219e-06
comp2271444_c1_seq4	-2.30058	7.97568	31.163	2.37241e-08	1.72253e-06
comp2143340_c0_seq1	-2.24213	4.32398	31.1455	2.394e-08	1.73578e-06
comp2275636_c0_seq4	-3.25094	2.5058	31.139	2.40202e-08	1.73918e-06
comp2253037_c0_seq10	-3.85085	2.25318	31.1102	2.43785e-08	1.76267e-06
comp2267190_c1_seq5	-3.12782	1.92557	31.0466	2.51905e-08	1.81885e-06
comp2274726_c0_seq7	-2.29847	2.66082	30.9009	2.71545e-08	1.95795e-06
comp2258733_c0_seq1	4.73804	-0.59693	30.8591	2.77452e-08	1.99777e-06
comp2254374_c1_seq4	2.97991	2.25842	30.8529	2.78342e-08	2.0011e-06
comp2232850_c0_seq1	4.52182	-1.6424	30.8506	2.78683e-08	2.0011e-06
comp2267918_c0_seq2	2.46196	3.35237	30.8158	2.83723e-08	2.03448e-06
comp2272161_c2_seq6	-2.0742	3.96028	30.8055	2.85233e-08	2.0425e-06
comp2199259_c0_seq2	-2.2715	2.1292	30.7777	2.89345e-08	2.06909e-06
comp2277700_c0_seq9	-1.5686	5.08215	30.7587	2.92184e-08	2.08653e-06
comp2271186_c0_seq2	-2.16291	6.07953	30.7207	2.97971e-08	2.12494e-06
comp2275229_c0_seq16	-2.7018	4.94184	30.7041	3.00535e-08	2.13851e-06
comp2262932_c0_seq1	-2.93358	1.50575	30.703	3.00695e-08	2.13851e-06
comp2266901_c1_seq8	2.26972	3.62252	30.6936	3.02158e-08	2.14497e-06
comp2276661_c0_seq2	-2.3221	5.21285	30.6919	3.02427e-08	2.14497e-06
comp2277289_c2_seq2	2.58193	2.97216	30.6826	3.03883e-08	2.15236e-06
comp2249950_c0_seq1	3.12805	0.134266	30.52	3.30435e-08	2.33724e-06
comp2263096_c0_seq1	1.91648	4.86112	30.5126	3.31698e-08	2.34299e-06
comp2276143_c0_seq2	-4.17202	3.13815	30.472	3.38721e-08	2.38936e-06
comp2273333_c0_seq5	1.99173	4.67714	30.4325	3.45681e-08	2.43516e-06
comp2264020_c0_seq1	-2.45117	3.34541	30.4272	3.46636e-08	2.43859e-06
comp2268417_c0_seq2	-2.88809	6.43334	30.4129	3.4919e-08	2.45324e-06
comp2276523_c0_seq2	2.14605	9.79618	30.3009	3.69949e-08	2.59558e-06
comp2256469_c0_seq1	-5.58583	-0.162278	30.2707	3.75761e-08	2.6328e-06
comp2265588_c0_seq1	-3.0615	0.976853	30.255	3.78815e-08	2.65064e-06
comp2271960_c0_seq6	-3.27047	2.86491	30.2464	3.805e-08	2.65885e-06
comp2264956_c0_seq1	-2.50021	3.0371	30.2331	3.8311e-08	2.6735e-06
comp2267703_c0_seq2	-2.89439	1.05035	30.2239	3.84929e-08	2.6826e-06
comp2268243_c0_seq2	2.58185	1.08163	30.2063	3.88443e-08	2.70347e-06
comp2276146_c0_seq2	-1.74064	5.41013	30.2005	3.89604e-08	2.70793e-06
comp2263738_c0_seq2	1.53228	4.70776	30.1689	3.9601e-08	2.74879e-06
comp2267225_c1_seq1	-3.23687	0.441259	30.1598	3.97874e-08	2.75805e-06
comp2253903_c0_seq1	-3.34557	3.16063	30.1336	4.03291e-08	2.79188e-06
comp2269619_c0_seq1	3.29737	5.0999	30.1209	4.05927e-08	2.8064e-06
comp2142789_c0_seq2	-2.25702	2.40984	30.0969	4.10987e-08	2.83761e-06
comp1368210_c0_seq1	3.1212	2.07316	30.0863	4.13243e-08	2.84941e-06
comp2277503_c0_seq1	1.99405	3.78982	30.0784	4.14933e-08	2.85727e-06
comp2277143_c0_seq2	2.62747	1.91324	30.0685	4.17051e-08	2.86807e-06
comp2266634_c0_seq1	-4.04582	0.780501	30.0327	4.24819e-08	2.91763e-06
comp2242437_c0_seq2	2.92975	-0.536382	30.027	4.2608e-08	2.92243e-06
comp2267586_c4_seq1	-4.15393	-0.438626	30.0164	4.28404e-08	2.93451e-06
comp2279404_c0_seq1	-4.55332	0.565496	29.9995	4.32167e-08	2.9564e-06
comp2266805_c0_seq1	-3.86593	0.486117	29.9357	4.46612e-08	3.0512e-06
comp2262204_c0_seq1	-1.96036	4.1201	29.9227	4.49607e-08	3.06764e-06
comp2268018_c0_seq3	3.47106	0.708255	29.9041	4.53953e-08	3.09324e-06
Pdu_Vtg_2.1	6.88801	-2.58374	29.8871	4.5796e-08	3.11646e-06
comp2260132_c0_seq1	-3.91659	-0.0815118	29.8801	4.59606e-08	3.12358e-06
comp2210398_c0_seq1	4.07788	0.0879328	29.8553	4.65522e-08	3.15966e-06
comp2260613_c0_seq2	-2.51074	2.31271	29.8146	4.75394e-08	3.22246e-06
comp2206928_c0_seq1	2.09444	3.8296	29.7984	4.79393e-08	3.24535e-06
comp2274492_c0_seq6	-2.90961	1.50742	29.7876	4.82054e-08	3.25912e-06
comp2263713_c0_seq2	-1.9288	4.81024	29.7703	4.86391e-08	3.28418e-06
comp2274564_c0_seq2	-2.0998	2.96715	29.7314	4.96243e-08	3.34636e-06
comp2264633_c1_seq2	-2.31859	3.02606	29.7221	4.98623e-08	3.35806e-06
comp2272684_c0_seq6	-2.01644	3.64186	29.7163	5.00124e-08	3.36382e-06
comp2276966_c0_seq13	-1.94337	6.64679	29.7121	5.01219e-08	3.36683e-06
comp2246565_c0_seq1	-3.04144	1.16465	29.692	5.06443e-08	3.39581e-06
comp2268128_c0_seq11	2.16295	3.25886	29.6889	5.07232e-08	3.39581e-06
comp2248879_c0_seq1	-3.50143	2.41003	29.688	5.07489e-08	3.39581e-06
comp2278569_c0_seq1	-1.89694	7.29467	29.6535	5.16593e-08	3.44976e-06
comp2276446_c0_seq2	1.86962	6.00528	29.6524	5.16878e-08	3.44976e-06
comp2239558_c0_seq1	2.89552	0.210689	29.6494	5.17679e-08	3.45069e-06
comp2270240_c0_seq1	2.63769	7.5361	29.5943	5.32623e-08	3.54576e-06
comp2261064_c0_seq1	2.36254	4.57562	29.5555	5.43391e-08	3.61282e-06
comp2262206_c0_seq1	-2.67907	6.40626	29.524	5.52281e-08	3.66724e-06
comp2176475_c0_seq1	3.78224	-0.473983	29.5164	5.54468e-08	3.67708e-06
comp2277638_c0_seq1	-2.19588	4.86815	29.5131	5.55399e-08	3.67856e-06
comp2266806_c0_seq8	-3.20011	3.34159	29.4901	5.62023e-08	3.71771e-06
comp2266336_c1_seq2	2.53578	2.17437	29.4807	5.64774e-08	3.73116e-06
comp2254431_c0_seq4	1.94492	1.46185	29.4394	5.76929e-08	3.80663e-06
comp2270332_c0_seq1	-3.80482	0.271149	29.4304	5.79623e-08	3.81957e-06
gnl|Pdu_trscr_assembly_1|3867	-2.46624	8.61988	29.4032	5.8781e-08	3.86862e-06
comp2272614_c0_seq2	-2.95784	4.9048	29.3875	5.92588e-08	3.89514e-06
comp2274497_c0_seq1	-2.74666	2.54234	29.3573	6.01891e-08	3.94653e-06
comp2266360_c0_seq2	2.01429	1.43438	29.357	6.01991e-08	3.94653e-06
comp1934156_c0_seq1	-2.35506	1.42906	29.3548	6.0268e-08	3.94653e-06
comp2257382_c0_seq3	-3.6229	9.33411	29.3423	6.06579e-08	3.96707e-06
comp2266617_c0_seq1	3.02261	4.20376	29.3132	6.1576e-08	4.02207e-06
comp2243025_c0_seq2	-1.92277	4.95443	29.3049	6.18383e-08	4.03413e-06
comp2264734_c0_seq1	-2.72144	1.45301	29.2816	6.25865e-08	4.07784e-06
comp2248527_c0_seq2	2.16896	6.34236	29.2706	6.29439e-08	4.09599e-06
comp2273112_c0_seq5	-3.15262	0.973401	29.239	6.39777e-08	4.15807e-06
comp2239040_c0_seq1	-2.60372	1.78877	29.2247	6.4451e-08	4.18361e-06
comp2249361_c0_seq2	-3.3791	1.23684	29.2097	6.49542e-08	4.21102e-06
comp2264679_c1_seq10	-1.96913	4.32296	29.1998	6.52868e-08	4.22649e-06
comp2028238_c0_seq1	-2.11125	2.25668	29.1977	6.53552e-08	4.22649e-06
comp2201594_c0_seq1	2.76254	1.01466	29.1787	6.59993e-08	4.26285e-06
comp2274474_c0_seq5	-1.74624	6.32463	29.1657	6.64454e-08	4.28635e-06
comp2254333_c0_seq1	-1.95231	2.77188	29.1541	6.68433e-08	4.30668e-06
comp2258854_c0_seq2	-2.81558	1.06656	29.1441	6.71911e-08	4.32374e-06
comp2274822_c1_seq1	2.1228	5.34647	29.1332	6.75709e-08	4.3428e-06
comp2262211_c0_seq21	2.05741	9.35254	29.113	6.82758e-08	4.3827e-06
comp2209889_c0_seq4	2.18738	2.28315	29.0796	6.9464e-08	4.45348e-06
comp2270884_c1_seq1	-3.60526	0.519786	29.0615	7.0117e-08	4.48982e-06
comp2264330_c2_seq2	-3.21861	1.27888	29.0423	7.08163e-08	4.52902e-06
comp2260578_c1_seq1	4.05248	-1.75061	29.0396	7.09134e-08	4.52967e-06
comp2262051_c0_seq1	-3.33388	1.70539	29.0353	7.10718e-08	4.53422e-06
comp2274552_c0_seq10	2.26126	4.51367	28.944	7.45026e-08	4.74729e-06
comp2259097_c0_seq2	-3.24728	1.13218	28.9403	7.46444e-08	4.7505e-06
comp2269767_c0_seq1	-2.32721	2.43566	28.9244	7.52593e-08	4.78379e-06
comp2274254_c1_seq4	-1.98301	3.30525	28.9196	7.54449e-08	4.78974e-06
comp2272494_c0_seq1	-2.07582	2.75066	28.9072	7.59318e-08	4.81155e-06
comp2274095_c1_seq13	-2.98428	4.19762	28.9061	7.59733e-08	4.81155e-06
comp1194329_c0_seq1	-1.85079	5.63685	28.8868	7.6734e-08	4.85382e-06
comp2237121_c0_seq1	2.18488	4.23917	28.7935	8.05204e-08	5.08715e-06
comp2278376_c0_seq1	-2.4142	6.71815	28.7709	8.14678e-08	5.14077e-06
comp2262877_c0_seq1	-2.65923	4.29977	28.7473	8.24655e-08	5.19118e-06
comp2250017_c0_seq1	-2.13299	2.12002	28.7463	8.25081e-08	5.19118e-06
comp2243810_c0_seq2	2.16661	5.63164	28.7449	8.25659e-08	5.19118e-06
comp2202319_c1_seq1	-2.80991	1.30742	28.6885	8.50062e-08	5.33816e-06
comp2226460_c0_seq1	5.15892	3.24001	28.6787	8.54366e-08	5.35873e-06
comp2265615_c0_seq3	3.46309	3.14778	28.6632	8.61245e-08	5.39537e-06
comp2244057_c0_seq1	2.5415	-0.0316989	28.6263	8.7781e-08	5.49254e-06
comp2274951_c0_seq5	-2.27216	2.24789	28.62	8.80666e-08	5.50379e-06
comp2276539_c0_seq2	-1.6712	5.07051	28.6094	8.85523e-08	5.52751e-06
comp2272749_c1_seq3	-1.64876	4.31364	28.5801	8.98993e-08	5.60487e-06
comp2255764_c0_seq3	-3.87603	1.60398	28.57	9.03705e-08	5.62751e-06
comp2261136_c0_seq5	-8.15933	-0.863141	28.5588	9.08968e-08	5.65352e-06
comp2256613_c0_seq1	-2.60622	5.18931	28.5039	9.35116e-08	5.80921e-06
comp1975994_c0_seq1	1.96679	4.60218	28.4844	9.44571e-08	5.86096e-06
comp2254167_c0_seq1	2.85233	6.0144	28.47	9.5164e-08	5.89779e-06
gene17	2.41865	11.383	28.4667	9.53235e-08	5.90065e-06
gnl|Pdu_trscr_assembly_1|945	-2.71918	1.55102	28.4576	9.57714e-08	5.92134e-06
comp2234888_c0_seq2	3.26744	-0.8555	28.4513	9.6084e-08	5.93361e-06
comp2270901_c0_seq1	-3.78785	0.41182	28.4071	9.83064e-08	6.06366e-06
comp2273721_c0_seq12	-2.13975	2.61388	28.394	9.89717e-08	6.09748e-06
comp2274903_c0_seq2	-2.9042	1.8101	28.3839	9.94885e-08	6.12207e-06
comp2274834_c0_seq1	2.92949	-0.100614	28.3812	9.96267e-08	6.12334e-06
comp2245811_c0_seq1	-2.03919	5.60973	28.3737	1.00013e-07	6.13983e-06
comp2251380_c0_seq1	-2.71453	3.88662	28.3395	1.01798e-07	6.24205e-06
comp2268336_c0_seq2	-2.1505	4.54859	28.3366	1.01951e-07	6.24409e-06
comp1971890_c0_seq1	-3.2672	1.06338	28.3282	1.02395e-07	6.2639e-06
gnl|Pdu_trscr_assembly_1|2615	2.20449	4.97169	28.2995	1.03922e-07	6.34985e-06
comp1194411_c0_seq1	-2.71978	2.99813	28.2886	1.04507e-07	6.37813e-06
comp2268445_c0_seq3	-3.52642	2.95842	28.2779	1.0509e-07	6.4062e-06
comp2267886_c0_seq2	-3.39683	0.666805	28.2565	1.06255e-07	6.46674e-06
comp2190307_c0_seq2	-2.99433	0.750348	28.2551	1.06332e-07	6.46674e-06
comp2271554_c1_seq2	2.33301	1.87556	28.2119	1.08733e-07	6.60504e-06
comp2275955_c0_seq3	-1.87426	2.73297	28.1892	1.10015e-07	6.67514e-06
comp2273432_c0_seq4	2.68889	1.75072	28.1844	1.10288e-07	6.68394e-06
comp2269800_c0_seq22	2.18659	4.95653	28.1037	1.14987e-07	6.95577e-06
comp2278282_c0_seq5	2.74083	4.47905	28.1028	1.15041e-07	6.95577e-06
comp2276039_c0_seq1	1.77996	5.3818	28.0682	1.17115e-07	7.07297e-06
comp2140493_c0_seq1	-3.78046	2.39537	28.0545	1.17947e-07	7.11495e-06
comp2279767_c0_seq1	1.81479	3.18028	27.9724	1.23061e-07	7.41483e-06
comp2277289_c0_seq1	2.99374	3.79247	27.9672	1.23388e-07	7.42595e-06
comp2277652_c0_seq4	-2.78923	6.4458	27.9274	1.25955e-07	7.56921e-06
comp2269675_c1_seq8	-1.92613	4.17196	27.9258	1.26059e-07	7.56921e-06
comp2273626_c1_seq1	1.74701	6.01873	27.9212	1.26355e-07	7.57824e-06
comp2241437_c0_seq1	-3.19504	1.86922	27.8947	1.28097e-07	7.6739e-06
comp2277298_c0_seq4	2.06615	5.17051	27.8803	1.29056e-07	7.72246e-06
comp2255435_c0_seq1	3.94504	5.33998	27.8752	1.29399e-07	7.7341e-06
comp2268642_c0_seq2	2.40196	1.34809	27.869	1.2981e-07	7.74975e-06
comp2257746_c0_seq2	-2.72973	2.97782	27.8625	1.30248e-07	7.7646e-06
comp2273404_c0_seq1	3.55239	6.18067	27.8609	1.30357e-07	7.7646e-06
comp1194082_c0_seq1	-1.94088	3.47437	27.8554	1.30732e-07	7.77803e-06
gnl|Pdu_trscr_assembly_1|4310	-2.74396	4.69482	27.8472	1.31284e-07	7.80194e-06
comp2254575_c0_seq1	1.93131	2.97965	27.8446	1.31458e-07	7.80341e-06
gnl|Pdu_trscr_assembly_1|2470	2.54789	3.14884	27.8389	1.31852e-07	7.81784e-06
comp2263818_c0_seq1	1.89455	2.277	27.8073	1.34021e-07	7.93742e-06
comp1192934_c0_seq1	3.05965	2.28629	27.7939	1.34952e-07	7.98347e-06
comp2273215_c1_seq2	-2.28841	5.00275	27.7755	1.36243e-07	8.05072e-06
comp2267504_c3_seq1	-1.93371	2.19651	27.7477	1.38215e-07	8.15798e-06
comp2261886_c0_seq2	2.66113	3.52685	27.7384	1.38878e-07	8.17959e-06
comp2270781_c0_seq3	-3.15326	3.44615	27.7382	1.38896e-07	8.17959e-06
comp2273647_c0_seq2	-2.76946	5.39866	27.7238	1.39929e-07	8.23117e-06
comp2225718_c0_seq1	-3.56328	0.349511	27.6768	1.43373e-07	8.4242e-06
comp2265493_c0_seq1	-1.53847	6.69012	27.6662	1.44157e-07	8.46073e-06
comp2272717_c0_seq1	-2.43734	1.65711	27.6397	1.46147e-07	8.55915e-06
comp2138971_c0_seq1	-1.91468	3.66013	27.6395	1.46163e-07	8.55915e-06
comp2262667_c1_seq1	-2.312	2.76452	27.5892	1.50015e-07	8.77488e-06
comp2257429_c0_seq1	-2.29621	2.18493	27.5785	1.50843e-07	8.81339e-06
comp2268642_c1_seq1	2.07201	2.04066	27.5648	1.51916e-07	8.86612e-06
comp2260492_c1_seq4	-3.10066	3.34143	27.5597	1.52316e-07	8.87956e-06
comp2269058_c0_seq1	-2.58993	1.39004	27.5268	1.5493e-07	9.02179e-06
comp2277018_c0_seq3	2.72026	0.99868	27.5027	1.56875e-07	9.12384e-06
comp2210246_c0_seq1	-4.43302	-0.545426	27.5008	1.57033e-07	9.12384e-06
comp2277034_c1_seq4	2.26053	2.35227	27.4943	1.57557e-07	9.14409e-06
comp2276996_c0_seq5	1.67059	7.12666	27.4837	1.58425e-07	9.18422e-06
comp2197409_c0_seq2	2.73923	2.92083	27.4773	1.58949e-07	9.20438e-06
comp2278032_c0_seq9	-2.04645	4.38992	27.4667	1.59825e-07	9.24479e-06
comp2267745_c0_seq3	2.50039	0.30263	27.4532	1.60938e-07	9.29888e-06
comp2247881_c0_seq1	-2.15604	2.48709	27.4339	1.62557e-07	9.37823e-06
comp2272742_c0_seq4	-2.77022	4.51836	27.4325	1.62672e-07	9.37823e-06
gnl|Pdu_trscr_assembly_1|22617	-2.42884	2.0466	27.4185	1.63858e-07	9.43615e-06
comp2253379_c0_seq1	1.74361	4.23755	27.3671	1.68273e-07	9.67967e-06
comp2275797_c0_seq1	-1.69457	3.9676	27.3539	1.69422e-07	9.73506e-06
comp2269213_c0_seq3	2.57617	3.3485	27.3274	1.71758e-07	9.8584e-06
comp2226073_c0_seq2	4.32128	-0.34317	27.3242	1.72045e-07	9.86399e-06
comp2265508_c0_seq15	-1.88332	3.79384	27.3114	1.73186e-07	9.91848e-06
comp2266609_c1_seq11	-2.19327	3.49184	27.2782	1.76186e-07	1.00792e-05
comp2276641_c0_seq2	2.47987	6.71912	27.266	1.77302e-07	1.01319e-05
comp2255158_c0_seq2	-4.05986	0.158543	27.2526	1.78531e-07	1.01909e-05
comp2248271_c0_seq1	-7.83722	-0.746364	27.2434	1.79385e-07	1.02285e-05
comp2266631_c0_seq1	1.90907	4.38171	27.199	1.83554e-07	1.04547e-05
comp2223422_c0_seq1	-1.76649	3.51937	27.1743	1.85915e-07	1.05777e-05
comp2237456_c0_seq1	-2.57424	1.42064	27.1333	1.89902e-07	1.07927e-05
comp2268776_c0_seq3	-1.92302	3.66497	27.0897	1.94228e-07	1.10265e-05
gnl|Pdu_trscr_assembly_1|264488	3.50739	-1.54231	27.0846	1.94746e-07	1.10439e-05
comp2246985_c0_seq1	-2.52006	4.44214	27.0559	1.97659e-07	1.11969e-05
comp2277424_c0_seq5	-3.18045	3.01416	27.0176	2.01615e-07	1.14085e-05
comp2256040_c0_seq3	-3.09172	6.94709	27.0117	2.02233e-07	1.14311e-05
comp2232290_c0_seq2	-2.20602	8.52406	27.001	2.0335e-07	1.14818e-05
comp2274476_c0_seq5	-2.61661	2.16345	26.9966	2.03813e-07	1.14955e-05
comp2242039_c0_seq2	-8.14538	0.0945388	26.9785	2.05732e-07	1.15828e-05
comp2262167_c0_seq1	-4.44247	2.22096	26.977	2.05895e-07	1.15828e-05
comp2262931_c0_seq2	6.24677	4.04173	26.9757	2.0603e-07	1.15828e-05
comp2273048_c0_seq1	-2.2936	3.35266	26.9728	2.06339e-07	1.15877e-05
comp2252814_c0_seq1	-3.5749	0.303894	26.9294	2.11026e-07	1.18381e-05
comp2272356_c0_seq4	1.69744	4.61241	26.9245	2.11565e-07	1.18556e-05
gnl|Pdu_trscr_assembly_1|11031	-1.99622	3.8558	26.8882	2.15571e-07	1.20671e-05
comp2267666_c0_seq3	2.2511	2.1726	26.8735	2.17219e-07	1.21463e-05
comp2261571_c0_seq1	2.68275	1.27106	26.8407	2.20929e-07	1.23405e-05
comp2234453_c0_seq2	-2.97033	3.78243	26.8368	2.21377e-07	1.23523e-05
comp2257660_c0_seq2	-3.53636	1.63987	26.823	2.22965e-07	1.24276e-05
comp2268127_c0_seq1	1.82983	3.08854	26.8032	2.25263e-07	1.25422e-05
comp2278099_c1_seq2	-1.58445	5.63184	26.7377	2.33034e-07	1.2961e-05
comp2268797_c0_seq2	-3.66426	1.40295	26.7294	2.34034e-07	1.30027e-05
comp2276586_c0_seq3	3.4169	2.82559	26.7071	2.3675e-07	1.31396e-05
comp2263728_c0_seq1	4.48001	3.8045	26.6991	2.37731e-07	1.318e-05
comp2277237_c0_seq2	1.55893	4.56048	26.6952	2.38217e-07	1.31929e-05
comp2277745_c0_seq2	-1.58248	4.59502	26.6905	2.3879e-07	1.32106e-05
comp2275901_c0_seq1	-1.83659	2.98159	26.6851	2.3946e-07	1.32336e-05
comp2273174_c0_seq4	-4.8624	-0.118449	26.681	2.39975e-07	1.3248e-05
comp2273413_c0_seq1	-1.96975	5.77862	26.6746	2.40765e-07	1.32775e-05
comp2264254_c0_seq2	-3.17201	0.97467	26.662	2.42347e-07	1.33506e-05
comp2192355_c0_seq1	4.5346	-1.9793	26.6394	2.45186e-07	1.34928e-05
comp2266254_c0_seq1	-3.14381	3.52802	26.6137	2.48472e-07	1.36592e-05
comp2279734_c0_seq1	-2.18142	2.29732	26.6113	2.48782e-07	1.36617e-05
gnl|Pdu_trscr_assembly_1|1345	2.35127	5.65034	26.6032	2.49826e-07	1.37046e-05
comp2256415_c0_seq2	-8.4754	-0.179727	26.5854	2.52141e-07	1.38171e-05
comp2260953_c0_seq2	-1.77473	5.33043	26.5606	2.55395e-07	1.39806e-05
comp2271257_c1_seq1	-2.43747	5.81816	26.5446	2.57523e-07	1.40824e-05
comp2233700_c0_seq1	-2.73319	1.4156	26.54	2.58136e-07	1.41011e-05
comp2267821_c0_seq1	-2.29036	2.87039	26.5181	2.61076e-07	1.42467e-05
comp2277455_c0_seq2	-1.94679	2.65488	26.5117	2.6195e-07	1.42795e-05
comp2259749_c0_seq5	-2.40356	1.92226	26.4991	2.63667e-07	1.43569e-05
comp2259627_c0_seq1	1.75395	3.7658	26.4972	2.63923e-07	1.43569e-05
comp2262834_c0_seq3	3.4873	2.02076	26.4825	2.65938e-07	1.44514e-05
comp2272636_c0_seq2	-2.66753	3.71095	26.4504	2.70386e-07	1.46778e-05
comp2249602_c0_seq3	3.41207	1.21825	26.4449	2.71164e-07	1.47047e-05
comp2248429_c0_seq1	-1.82874	3.61648	26.4357	2.72461e-07	1.47597e-05
comp2245391_c0_seq1	-2.48183	2.47519	26.4165	2.75175e-07	1.48912e-05
comp2270649_c0_seq5	2.30058	4.73047	26.411	2.75961e-07	1.49182e-05
comp2231993_c0_seq1	-3.64968	0.127418	26.3951	2.78239e-07	1.50258e-05
comp2271287_c1_seq1	-3.63068	1.20279	26.3793	2.80527e-07	1.51336e-05
comp2271937_c0_seq1	2.77254	0.223813	26.3678	2.82211e-07	1.52087e-05
comp2242712_c0_seq1	4.50403	-1.91816	26.3389	2.86454e-07	1.54214e-05
comp2276165_c0_seq6	2.58969	7.08318	26.3233	2.88788e-07	1.55292e-05
comp2248034_c0_seq1	-3.27437	0.822968	26.3215	2.89052e-07	1.55292e-05
comp2270465_c0_seq1	-3.5496	3.99098	26.2811	2.9516e-07	1.5841e-05
comp2275149_c1_seq1	-3.70743	3.7047	26.2677	2.97222e-07	1.59352e-05
comp2273870_c0_seq3	-1.98104	2.56604	26.2382	3.01798e-07	1.61639e-05
comp2265538_c0_seq7	-3.35765	-0.0681048	26.2289	3.03253e-07	1.62251e-05
comp2269109_c0_seq7	-2.21075	1.7968	26.2268	3.03586e-07	1.62263e-05
comp2271431_c0_seq28	-2.12169	6.66347	26.149	3.16063e-07	1.68758e-05
comp2255197_c0_seq1	-4.22767	-0.507186	26.1428	3.17085e-07	1.6913e-05
comp2272103_c1_seq2	-2.4224	4.20323	26.138	3.17863e-07	1.69372e-05
comp2241507_c0_seq1	-3.29888	2.77819	26.1033	3.23632e-07	1.7227e-05
comp2268821_c0_seq7	2.63786	1.73122	26.0479	3.33059e-07	1.77106e-05
comp2264981_c1_seq2	-2.79312	0.526105	26.0407	3.34293e-07	1.7758e-05
comp2270682_c0_seq1	3.00956	1.48021	26.0388	3.34631e-07	1.7758e-05
comp2275683_c0_seq3	1.77992	5.41369	26.0202	3.37857e-07	1.79109e-05
comp2250163_c0_seq2	-2.31776	1.63333	26.0152	3.38747e-07	1.79398e-05
comp2272177_c0_seq2	-3.47025	4.86414	26.007	3.40183e-07	1.79975e-05
comp2257612_c0_seq1	4.42414	-1.43744	25.9971	3.41923e-07	1.80712e-05
comp2138556_c0_seq1	4.401	-1.70277	25.968	3.4713e-07	1.83278e-05
comp2260463_c0_seq3	-3.01631	1.36568	25.9616	3.48284e-07	1.83558e-05
comp1769718_c0_seq1	-2.64491	4.97044	25.9611	3.48365e-07	1.83558e-05
comp2222124_c0_seq1	-2.23188	1.42713	25.9551	3.49448e-07	1.83943e-05
comp2277737_c0_seq3	-1.66661	3.33066	25.9418	3.51862e-07	1.85026e-05
comp2271755_c0_seq2	3.09271	6.44252	25.9238	3.55162e-07	1.86573e-05
comp2269198_c1_seq5	-1.76502	5.75489	25.8929	3.60898e-07	1.89395e-05
comp2253859_c0_seq1	-2.44186	1.34544	25.8719	3.64837e-07	1.91269e-05
comp2237419_c0_seq1	-2.55906	1.22614	25.8698	3.65239e-07	1.91288e-05
comp2278144_c0_seq4	-1.89497	5.00158	25.8593	3.67235e-07	1.9214e-05
comp2278580_c0_seq11	-1.60447	3.80179	25.8517	3.68676e-07	1.927e-05
comp2278240_c0_seq4	-2.26587	3.15198	25.7949	3.79686e-07	1.98255e-05
gnl|Pdu_trscr_assembly_1|91767	-1.79529	2.93298	25.7576	3.87101e-07	2.01925e-05
comp2272169_c2_seq2	-1.92592	3.34882	25.7483	3.8897e-07	2.02697e-05
comp2277160_c2_seq1	2.18153	4.30679	25.7162	3.95492e-07	2.05889e-05
gnl|Pdu_trscr_assembly_1|17237	1.61301	5.80958	25.7003	3.98761e-07	2.07384e-05
gi|146189532|emb|AM697680.1|_Platynereis_dumerilii_mRNA_for_hypothetical_protein_(ORF1),_isolate_8	5.31763	-2.04114	25.6759	4.0383e-07	2.0975e-05
gnl|Pdu_trscr_assembly_1|11033	-1.52573	4.71481	25.6746	4.04117e-07	2.0975e-05
comp2271029_c0_seq1	-1.95879	4.99047	25.6641	4.06321e-07	2.10684e-05
comp2256930_c1_seq1	-2.69239	1.12019	25.6559	4.08052e-07	2.11281e-05
comp2261373_c0_seq1	-1.67916	9.39823	25.6548	4.08284e-07	2.11281e-05
comp2275659_c1_seq6	1.78626	6.51911	25.6518	4.08906e-07	2.11393e-05
comp2267696_c0_seq11	2.96611	2.23088	25.6434	4.10702e-07	2.1211e-05
comp2277030_c1_seq3	-2.48624	1.12356	25.6304	4.13482e-07	2.13335e-05
comp2268433_c0_seq1	2.37337	1.98533	25.6158	4.16611e-07	2.14736e-05
comp2265826_c0_seq2	-3.08714	5.67848	25.5556	4.29814e-07	2.21323e-05
comp2275684_c1_seq2	-1.94747	3.83343	25.5512	4.30791e-07	2.21506e-05
comp2263482_c0_seq1	2.60977	1.06596	25.5502	4.31021e-07	2.21506e-05
comp2266922_c0_seq3	-3.06112	0.434673	25.5471	4.31712e-07	2.21642e-05
comp2271325_c1_seq2	3.61139	-1.60105	25.5301	4.35542e-07	2.23388e-05
comp2268651_c0_seq1	-1.76012	4.514	25.5042	4.41417e-07	2.26179e-05
comp2272909_c0_seq4	-3.43189	1.23445	25.5	4.42373e-07	2.26445e-05
comp2138612_c0_seq1	-3.15826	2.91064	25.4841	4.46035e-07	2.28096e-05
comp1970723_c0_seq1	-1.59451	5.74919	25.4648	4.50523e-07	2.30164e-05
comp2277461_c0_seq3	1.71662	4.8241	25.4525	4.53411e-07	2.31413e-05
comp2276978_c1_seq1	-2.63542	3.16986	25.4333	4.57949e-07	2.335e-05
comp2277815_c0_seq5	2.58676	6.5014	25.4297	4.58801e-07	2.33706e-05
comp2278052_c1_seq2	-1.63446	6.63321	25.3987	4.66237e-07	2.37261e-05
comp2262249_c0_seq1	-1.89904	2.86755	25.3908	4.68146e-07	2.38e-05
gnl|Pdu_trscr_assembly_1|7104	-1.80498	3.00793	25.3833	4.69964e-07	2.38691e-05
comp2275982_c0_seq18	-2.1475	3.35417	25.3797	4.7084e-07	2.38903e-05
comp2268289_c0_seq5	-2.2833	4.92719	25.3723	4.72665e-07	2.39391e-05
comp2141714_c0_seq1	3.05573	4.02052	25.372	4.7272e-07	2.39391e-05
comp2276437_c1_seq1	-2.17398	3.66706	25.3494	4.78298e-07	2.4198e-05
comp2275857_c0_seq4	1.81268	6.11594	25.3221	4.8511e-07	2.45188e-05
comp2272458_c0_seq6	-3.96644	1.43733	25.2882	4.93714e-07	2.49294e-05
comp2272098_c1_seq1	-3.92859	0.470825	25.2752	4.97046e-07	2.50734e-05
gnl|Pdu_trscr_assembly_1|15716	-2.92645	0.372329	25.2722	4.97842e-07	2.50892e-05
comp2273269_c0_seq6	-2.38161	1.06157	25.2408	5.06001e-07	2.54757e-05
comp2267968_c0_seq2	-3.56482	10.0853	25.2168	5.12334e-07	2.57697e-05
comp2267647_c0_seq1	-2.13139	2.85808	25.196	5.17908e-07	2.60249e-05
comp2261841_c1_seq1	-4.30327	0.101933	25.1887	5.19868e-07	2.60982e-05
comp2275224_c0_seq3	-2.43714	4.23188	25.1825	5.21536e-07	2.61567e-05
comp2277137_c0_seq4	-2.63708	2.53468	25.155	5.29017e-07	2.65063e-05
comp2274257_c2_seq1	-2.16184	3.04936	25.1511	5.30107e-07	2.65354e-05
comp2269794_c1_seq8	-2.07845	1.456	25.1412	5.32828e-07	2.6646e-05
comp2261897_c0_seq2	2.7431	2.58149	25.1128	5.40716e-07	2.70145e-05
comp2257880_c0_seq2	1.99554	3.51871	25.1104	5.41402e-07	2.70229e-05
comp2257855_c0_seq2	3.6396	0.240534	25.0906	5.46977e-07	2.7275e-05
comp2250036_c0_seq1	-2.27845	4.23115	25.0857	5.48394e-07	2.73195e-05
comp2232805_c0_seq1	2.27095	6.35226	25.0696	5.52966e-07	2.75209e-05
comp2258671_c0_seq2	2.61578	2.08732	25.0472	5.5945e-07	2.7817e-05
comp2253278_c0_seq3	-1.87055	3.10765	25.0414	5.61139e-07	2.78744e-05
comp2270709_c0_seq3	1.66115	5.06054	25.0349	5.63026e-07	2.79415e-05
comp2258543_c0_seq1	1.84202	4.70633	25.0229	5.66543e-07	2.80892e-05
comp2274588_c0_seq5	1.5058	6.11568	25.0048	5.71886e-07	2.83271e-05
comp2246811_c0_seq5	2.53386	1.70255	24.989	5.76586e-07	2.85328e-05
comp2254567_c0_seq2	-2.83511	1.18941	24.9837	5.78174e-07	2.85842e-05
comp2264860_c0_seq2	-2.04427	2.19372	24.9747	5.80862e-07	2.86898e-05
comp2257161_c0_seq1	-2.97798	3.98382	24.9683	5.82792e-07	2.87579e-05
comp2260528_c0_seq1	2.40318	2.67069	24.9595	5.85481e-07	2.88632e-05
comp2263299_c0_seq2	2.61525	0.549204	24.9072	6.01572e-07	2.96284e-05
comp2248806_c0_seq1	2.6517	0.860135	24.8643	6.15109e-07	3.02665e-05
gnl|Pdu_trscr_assembly_1|19606	-2.67216	1.75329	24.856	6.17774e-07	3.03689e-05
comp2264219_c1_seq3	-3.01054	1.70847	24.8496	6.19826e-07	3.0441e-05
comp2265059_c0_seq2	2.00405	2.66731	24.8394	6.23098e-07	3.05729e-05
comp2275569_c0_seq2	3.22684	3.52023	24.8302	6.26079e-07	3.06903e-05
comp2254354_c0_seq1	-2.8172	0.768524	24.8281	6.26767e-07	3.06951e-05
comp2269738_c0_seq1	1.85654	6.99161	24.8082	6.33281e-07	3.09849e-05
comp2274690_c0_seq14	-1.83861	3.84646	24.7745	6.44437e-07	3.15011e-05
comp2269060_c1_seq1	-2.59448	6.49553	24.7723	6.45192e-07	3.15085e-05
comp2276235_c1_seq9	-3.06424	2.38888	24.7638	6.48021e-07	3.1617e-05
gnl|Pdu_trscr_assembly_1|90137	-1.81112	2.70531	24.7519	6.52029e-07	3.17828e-05
comp2261512_c0_seq2	1.99335	4.57885	24.7302	6.59422e-07	3.2113e-05
comp2271544_c0_seq1	2.02913	2.97219	24.7272	6.6046e-07	3.21335e-05
comp2264493_c0_seq2	-1.96985	3.51374	24.7061	6.67734e-07	3.24365e-05
comp1953996_c0_seq1	-1.95558	3.29827	24.7055	6.67932e-07	3.24365e-05
Pdu_c-opsin1_cDNA_	5.38504	1.47122	24.6986	6.70322e-07	3.25222e-05
comp2277165_c0_seq1	-2.03342	3.66618	24.6796	6.76969e-07	3.28141e-05
comp2269350_c0_seq2	-2.16272	1.75236	24.6736	6.79085e-07	3.2886e-05
comp2269912_c0_seq6	-1.84199	2.8894	24.6681	6.81028e-07	3.29495e-05
comp2271521_c0_seq3	2.71755	1.62956	24.6608	6.8359e-07	3.30427e-05
comp2270915_c0_seq1	-1.94961	2.81556	24.6537	6.86143e-07	3.31354e-05
comp2271380_c0_seq2	1.92457	2.08044	24.6487	6.87922e-07	3.31905e-05
comp2252019_c0_seq1	-2.27767	2.15793	24.6365	6.92277e-07	3.33315e-05
comp2265651_c0_seq5	-2.50559	4.53176	24.6359	6.92511e-07	3.33315e-05
comp2277636_c1_seq2	2.0094	6.30064	24.6351	6.92766e-07	3.33315e-05
comp2277440_c0_seq1	-1.94858	3.66902	24.6129	7.00822e-07	3.3688e-05
comp2266591_c0_seq2	-3.01595	0.586375	24.6089	7.02275e-07	3.37267e-05
comp2254385_c0_seq3	-2.70139	1.56482	24.584	7.11392e-07	3.41331e-05
comp2269852_c0_seq5	-1.95819	5.6972	24.5496	7.24207e-07	3.47159e-05
comp2258942_c0_seq1	-1.60759	3.87835	24.538	7.28589e-07	3.48938e-05
comp2263235_c1_seq1	-3.37703	0.43889	24.5336	7.30253e-07	3.49414e-05
comp2254375_c0_seq1	-3.95253	0.341532	24.5106	7.39014e-07	3.52958e-05
comp2254515_c0_seq1	3.10877	1.78339	24.5106	7.39016e-07	3.52958e-05
comp2277186_c0_seq30	-2.21522	6.178	24.5082	7.39923e-07	3.53068e-05
comp2272087_c2_seq11	-2.12199	3.17641	24.5059	7.40826e-07	3.53174e-05
comp2142021_c1_seq1	3.32314	3.08564	24.4894	7.47201e-07	3.55888e-05
comp2263996_c0_seq7	-3.14748	2.33394	24.4726	7.53735e-07	3.58672e-05
comp2228733_c0_seq1	-7.76153	-0.248812	24.4668	7.56002e-07	3.59422e-05
comp2273899_c0_seq2	-2.05309	2.77848	24.442	7.65821e-07	3.63758e-05
gnl|Pdu_trscr_assembly_1|159181	3.23953	0.208419	24.4252	7.72533e-07	3.66612e-05
comp2261355_c0_seq1	-2.00589	4.54515	24.4134	7.7725e-07	3.68514e-05
comp2252351_c0_seq1	2.3011	-0.182714	24.4079	7.79466e-07	3.69228e-05
comp2198797_c0_seq2	-7.68567	-0.017236	24.4049	7.80692e-07	3.69473e-05
comp2262819_c0_seq1	-2.19915	1.31624	24.3993	7.82975e-07	3.69986e-05
comp2278502_c0_seq2	-1.75928	4.26827	24.3987	7.83198e-07	3.69986e-05
comp2256174_c0_seq1	2.71201	0.272759	24.3865	7.88186e-07	3.72005e-05
comp2239961_c0_seq1	-1.99719	2.51034	24.3813	7.90317e-07	3.72673e-05
comp2258624_c0_seq1	-7.48325	-1.01132	24.3741	7.93285e-07	3.73593e-05
comp2278479_c1_seq28	-1.91042	8.25638	24.3731	7.93703e-07	3.73593e-05
comp2267939_c0_seq1	3.80803	-0.408913	24.3472	8.04422e-07	3.78297e-05
comp2275601_c0_seq1	-1.78753	4.57424	24.3265	8.13148e-07	3.82055e-05
comp2234451_c0_seq4	3.79728	1.37736	24.2912	8.28144e-07	3.8875e-05
comp2241974_c0_seq1	-3.39697	2.08868	24.2839	8.31328e-07	3.89893e-05
comp2266173_c0_seq2	3.00501	-1.19622	24.2576	8.42756e-07	3.94884e-05
comp2268156_c1_seq2	3.02398	0.484931	24.2556	8.43614e-07	3.94884e-05
comp2252416_c0_seq1	2.10669	0.391942	24.2542	8.44245e-07	3.94884e-05
comp2259382_c0_seq2	-2.12207	3.71338	24.2491	8.46459e-07	3.95383e-05
comp2278048_c1_seq1	2.35795	2.52866	24.2483	8.46832e-07	3.95383e-05
comp2200124_c0_seq1	1.98551	2.62494	24.2405	8.5025e-07	3.96623e-05
comp2278108_c1_seq1	-2.11098	7.13272	24.2154	8.61386e-07	4.01458e-05
comp2226033_c0_seq1	2.26698	1.58725	24.2124	8.62732e-07	4.01726e-05
comp2265328_c0_seq2	-3.66645	0.303959	24.1859	8.74707e-07	4.06938e-05
comp2277384_c0_seq3	-2.55222	5.74845	24.1803	8.7727e-07	4.07766e-05
comp2273492_c0_seq13	2.3769	1.6469	24.1771	8.78715e-07	4.08073e-05
comp2216126_c0_seq1	-1.8041	2.50099	24.17	8.81936e-07	4.09204e-05
comp2264127_c0_seq1	-2.65917	3.20383	24.1638	8.84803e-07	4.10004e-05
comp2265138_c2_seq2	-3.05947	1.42438	24.1629	8.85235e-07	4.10004e-05
gnl|Pdu_trscr_assembly_1|16880	2.64446	5.43615	24.1559	8.88424e-07	4.11115e-05
comp2262831_c1_seq1	-1.97583	4.71549	24.1475	8.92335e-07	4.12559e-05
comp2265924_c0_seq3	2.77758	2.73184	24.098	9.15577e-07	4.22928e-05
comp2276746_c0_seq7	-1.64184	5.51456	24.091	9.18905e-07	4.24089e-05
comp2267342_c0_seq3	-3.08749	-0.422465	24.0858	9.2136e-07	4.24846e-05
comp2271289_c2_seq4	-2.50282	2.89113	24.0704	9.28792e-07	4.27894e-05
comp2265639_c0_seq3	-2.56709	0.819229	24.061	9.33309e-07	4.29339e-05
comp2271710_c1_seq4	1.65459	6.89217	24.0605	9.3358e-07	4.29339e-05
comp2277913_c1_seq2	-3.63207	2.37814	24.0569	9.35282e-07	4.29743e-05
comp2261300_c0_seq2	-2.46426	1.51145	24.0491	9.39099e-07	4.31116e-05
comp2265986_c0_seq1	1.80348	6.71974	24.0426	9.42263e-07	4.32188e-05
comp2275233_c0_seq4	-1.83337	2.32768	24.0408	9.43145e-07	4.32211e-05
comp2037149_c0_seq1	-2.94337	4.89475	24.015	9.55888e-07	4.37666e-05
comp2259418_c0_seq1	-1.90133	2.46136	23.9924	9.67172e-07	4.42443e-05
comp2258783_c0_seq1	3.46668	-1.35067	23.94	9.93865e-07	4.54255e-05
comp2138461_c0_seq1	4.37771	-1.91014	23.9377	9.95046e-07	4.54396e-05
comp2272717_c1_seq3	-2.05141	3.4172	23.9308	9.98607e-07	4.55622e-05
comp2258826_c0_seq1	2.88438	0.976085	23.9201	1.00419e-06	4.57394e-05
comp2261589_c0_seq1	2.52228	0.183394	23.92	1.00425e-06	4.57394e-05
comp2267914_c1_seq2	2.35323	4.09975	23.9125	1.00817e-06	4.58777e-05
comp2270876_c0_seq2	-1.94769	5.37654	23.9064	1.01136e-06	4.59827e-05
comp2278539_c0_seq2	-1.77976	10.5138	23.8967	1.01647e-06	4.61751e-05
comp2279658_c0_seq1	-2.15036	1.85184	23.8869	1.02163e-06	4.63579e-05
comp2252349_c0_seq1	3.55598	0.324529	23.8857	1.02228e-06	4.63579e-05
comp2276029_c0_seq1	2.35013	4.24039	23.8804	1.0251e-06	4.64455e-05
comp2265205_c2_seq7	-3.37198	1.28394	23.8573	1.03749e-06	4.69659e-05
comp2260337_c0_seq2	2.37071	0.313073	23.8542	1.03913e-06	4.6999e-05
comp2142514_c0_seq2	-2.71856	1.34406	23.8155	1.06027e-06	4.79139e-05
comp2275528_c0_seq1	-1.7085	5.05853	23.8064	1.06528e-06	4.80562e-05
comp2277062_c0_seq6	2.37556	2.40434	23.8059	1.06557e-06	4.80562e-05
comp2258106_c0_seq2	-2.12526	2.48781	23.8047	1.06619e-06	4.80562e-05
comp2257509_c0_seq1	-2.35371	1.49355	23.7938	1.07225e-06	4.82875e-05
comp2272123_c0_seq4	-2.3323	2.06296	23.7871	1.07601e-06	4.8415e-05
comp2277656_c2_seq1	-2.82427	2.12069	23.7592	1.09171e-06	4.90789e-05
comp2265267_c1_seq1	-4.55386	-0.386733	23.7529	1.09531e-06	4.91981e-05
comp2266918_c0_seq2	3.46457	-0.845791	23.7409	1.10213e-06	4.94618e-05
comp2266191_c3_seq1	-2.74907	1.41305	23.7372	1.10428e-06	4.95158e-05
comp2198403_c0_seq2	-2.6511	1.6985	23.7303	1.10824e-06	4.96503e-05
comp2249979_c0_seq1	-2.4788	0.854392	23.7191	1.11473e-06	4.98981e-05
comp2264508_c1_seq2	-2.70673	1.7341	23.7164	1.11629e-06	4.9925e-05
comp2273746_c0_seq1	-2.7617	1.25694	23.714	1.11769e-06	4.99449e-05
comp2271554_c0_seq2	2.6277	1.53854	23.7043	1.12329e-06	5.0152e-05
comp2268347_c0_seq5	-1.89168	4.37743	23.6928	1.13003e-06	5.04098e-05
comp2261673_c1_seq1	-3.14775	0.558224	23.6364	1.16363e-06	5.18644e-05
comp2269144_c1_seq1	2.19464	-0.134149	23.6133	1.17768e-06	5.24456e-05
comp2206043_c0_seq1	-5.48603	-1.00606	23.6014	1.18499e-06	5.27261e-05
comp2204288_c0_seq1	-3.85925	0.504053	23.5933	1.18998e-06	5.29029e-05
comp2275542_c0_seq9	-2.56942	3.94476	23.556	1.21333e-06	5.38948e-05
comp2276780_c0_seq2	-1.46286	4.47849	23.5543	1.21437e-06	5.38949e-05
comp2205171_c0_seq1	-4.79147	-0.879415	23.5474	1.21876e-06	5.40439e-05
comp2277724_c0_seq10	-1.85205	5.6681	23.5326	1.22815e-06	5.44137e-05
comp2140459_c0_seq2	4.5512	1.09739	23.5253	1.23284e-06	5.45752e-05
comp2276289_c0_seq1	-1.73765	6.37665	23.5194	1.23663e-06	5.46964e-05
comp2262844_c0_seq2	2.76391	1.065	23.5059	1.24532e-06	5.50339e-05
comp2263761_c0_seq9	1.92331	3.30087	23.5009	1.24852e-06	5.51288e-05
comp2241308_c0_seq1	-2.04444	2.16424	23.4963	1.25153e-06	5.52149e-05
comp2276307_c0_seq1	-2.00916	4.11137	23.4846	1.25919e-06	5.55056e-05
comp2257071_c0_seq1	-3.38311	1.67574	23.48	1.26217e-06	5.55898e-05
gnl|Pdu_trscr_assembly_1|20826	-2.45206	1.76454	23.4585	1.27638e-06	5.61685e-05
comp2270158_c0_seq1	-2.27978	3.78439	23.4568	1.27747e-06	5.61689e-05
comp2263556_c0_seq2	1.817	3.3394	23.4386	1.28964e-06	5.66559e-05
comp2253261_c0_seq2	2.52572	-0.572336	23.3968	1.31795e-06	5.78511e-05
comp2140778_c0_seq1	2.17347	1.60236	23.3923	1.32106e-06	5.79384e-05
comp2277538_c1_seq1	-2.29236	2.89924	23.3518	1.34916e-06	5.91213e-05
comp2213012_c1_seq1	4.3003	-1.41251	23.3405	1.35713e-06	5.94206e-05
comp2280032_c0_seq1	-1.74661	5.75607	23.3267	1.36693e-06	5.97991e-05
comp2263981_c0_seq1	-3.80911	2.34425	23.2988	1.3869e-06	6.06217e-05
comp2232787_c0_seq1	-2.09977	1.31575	23.2862	1.39597e-06	6.09671e-05
comp2267410_c0_seq2	-3.03808	0.462608	23.2824	1.39876e-06	6.10379e-05
comp2260877_c0_seq1	3.7723	-0.839337	23.2565	1.41771e-06	6.18131e-05
comp2259320_c0_seq2	-2.64855	0.808828	23.2293	1.43793e-06	6.26248e-05
comp2234671_c0_seq1	1.84827	4.75343	23.2282	1.43874e-06	6.26248e-05
comp2270975_c1_seq8	-2.49887	3.13269	23.2207	1.44433e-06	6.28158e-05
gnl|Pdu_trscr_assembly_1|201059	-2.30063	1.99085	23.2064	1.45512e-06	6.32321e-05
comp2276819_c0_seq1	-1.83029	2.1501	23.1911	1.46671e-06	6.36827e-05
comp1296583_c0_seq1	-8.35991	-0.22748	23.1841	1.47209e-06	6.38628e-05
comp2269818_c0_seq2	-1.97345	3.03527	23.1761	1.47822e-06	6.40434e-05
comp2270353_c0_seq3	-1.80198	4.71646	23.1755	1.47871e-06	6.40434e-05
comp2265464_c0_seq1	-2.27644	6.92758	23.1733	1.48037e-06	6.40618e-05
comp1981288_c0_seq1	-1.63164	3.16252	23.1572	1.49285e-06	6.45361e-05
gnl|Pdu_trscr_assembly_1|3048	-2.89429	7.72275	23.1559	1.49381e-06	6.45361e-05
comp2254063_c0_seq2	4.46517	-1.71259	23.1518	1.49701e-06	6.46211e-05
comp2265002_c0_seq2	-2.14657	3.48371	23.138	1.50781e-06	6.50333e-05
comp2271959_c0_seq4	2.05205	4.42798	23.1329	1.51178e-06	6.51054e-05
comp2263059_c1_seq1	2.37199	0.208152	23.1327	1.51198e-06	6.51054e-05
comp2261818_c0_seq3	3.01964	0.784581	23.127	1.51644e-06	6.52433e-05
comp2254622_c0_seq1	-2.15748	3.34594	23.1252	1.51788e-06	6.52512e-05
comp2260291_c0_seq1	-2.64268	6.94211	23.1139	1.52681e-06	6.55809e-05
comp2260219_c0_seq1	3.97926	-0.0451838	23.0708	1.56142e-06	6.70123e-05
comp2173693_c0_seq1	6.98872	-3.41112	23.0692	1.56277e-06	6.70152e-05
comp2275830_c1_seq1	2.55904	0.223151	23.0566	1.57304e-06	6.73999e-05
comp2222438_c0_seq1	-4.22884	-0.426812	23.051	1.57761e-06	6.754e-05
comp2272305_c0_seq1	1.73321	4.16194	23.0485	1.57968e-06	6.75733e-05
comp2261767_c1_seq3	2.92328	-0.287272	23.0341	1.59156e-06	6.80256e-05
comp2268188_c0_seq3	-2.15786	2.76123	23.0297	1.59521e-06	6.81256e-05
comp2266783_c2_seq1	2.14259	1.0562	23.0272	1.59728e-06	6.8158e-05
comp2270119_c0_seq15	-2.25284	5.05787	23.0153	1.60715e-06	6.84658e-05
comp2273867_c1_seq6	-1.96181	2.37767	23.0144	1.60789e-06	6.84658e-05
comp2271348_c0_seq1	-1.39929	6.39662	23.0136	1.6086e-06	6.84658e-05
comp2268816_c0_seq17	2.1162	2.6076	23.0122	1.60975e-06	6.84658e-05
comp2265950_c0_seq7	-3.79804	0.395449	23.0082	1.61313e-06	6.85533e-05
comp2263395_c0_seq1	1.90063	1.03725	22.9913	1.62739e-06	6.9103e-05
comp2256095_c0_seq1	-3.02181	1.73282	22.9619	1.65248e-06	7.01111e-05
comp2221859_c0_seq1	4.38105	0.0604772	22.9581	1.65573e-06	7.01918e-05
comp2259185_c0_seq1	-3.47468	-0.264501	22.9504	1.66232e-06	7.0414e-05
comp2239709_c0_seq1	3.66005	0.277567	22.9464	1.66585e-06	7.05059e-05
comp2278512_c0_seq10	1.89328	8.28992	22.9443	1.66767e-06	7.05258e-05
comp2274568_c0_seq1	1.74131	1.48457	22.9402	1.67122e-06	7.06184e-05
comp2278587_c0_seq14	-2.01874	8.93364	22.9283	1.68159e-06	7.09991e-05
comp2220966_c1_seq1	-2.30778	4.44696	22.9162	1.69221e-06	7.13897e-05
comp2142601_c0_seq1	-3.06952	2.84842	22.9075	1.69986e-06	7.16545e-05
comp1949817_c0_seq2	-3.81626	0.604817	22.9012	1.70543e-06	7.18308e-05
comp2235485_c0_seq1	5.63487	-1.28428	22.8929	1.71285e-06	7.20444e-05
comp2275871_c0_seq1	1.49535	3.02837	22.8924	1.71327e-06	7.20444e-05
comp2273142_c1_seq1	-1.87358	3.80917	22.882	1.72253e-06	7.23755e-05
gnl|Pdu_trscr_assembly_1|7327	-1.46748	4.89674	22.8704	1.733e-06	7.27565e-05
comp2248445_c0_seq1	-2.10733	1.05514	22.8644	1.73841e-06	7.2925e-05
comp2101170_c0_seq2	-5.29408	0.850688	22.8494	1.75202e-06	7.34368e-05
comp2273628_c0_seq6	-1.38262	5.56319	22.845	1.75605e-06	7.35155e-05
comp2275288_c0_seq3	-2.15379	4.32948	22.8443	1.75672e-06	7.35155e-05
comp2276176_c0_seq4	2.57224	5.26638	22.8371	1.76327e-06	7.37304e-05
comp2259859_c0_seq1	2.03386	7.30179	22.8297	1.77009e-06	7.39561e-05
gnl|Pdu_trscr_assembly_1|1644	-1.64141	5.70721	22.812	1.78644e-06	7.45791e-05
comp2222258_c0_seq1	1.39876	3.2382	22.8086	1.78966e-06	7.46118e-05
comp2142807_c0_seq1	-2.32887	4.93834	22.8081	1.79009e-06	7.46118e-05
comp1908346_c0_seq1	3.74354	-1.39167	22.7978	1.79972e-06	7.49533e-05
comp2272223_c0_seq1	2.39067	-0.273076	22.7916	1.80553e-06	7.51353e-05
comp2256160_c0_seq1	2.49967	0.336691	22.7886	1.80839e-06	7.51941e-05
comp2265088_c0_seq2	-3.04018	0.703405	22.7493	1.84573e-06	7.66854e-05
comp2264115_c0_seq1	-2.0299	5.16236	22.7252	1.86899e-06	7.75698e-05
comp2200386_c0_seq5	2.00633	4.17129	22.7242	1.87e-06	7.75698e-05
comp2265867_c0_seq7	-3.48082	1.13052	22.7149	1.87902e-06	7.78721e-05
comp2273190_c0_seq1	-1.70346	3.59979	22.7137	1.88027e-06	7.78721e-05
comp2276900_c4_seq3	2.06475	4.00997	22.6964	1.89718e-06	7.85099e-05
comp2197328_c0_seq1	-7.70163	-1.26741	22.6727	1.92074e-06	7.94217e-05
comp2258032_c0_seq1	-3.01786	1.14938	22.6634	1.93011e-06	7.97458e-05
gnl|Pdu_trscr_assembly_1|7688	2.4147	1.75457	22.6618	1.93168e-06	7.97474e-05
comp2139301_c0_seq1	4.32568	-0.940091	22.6502	1.94336e-06	8.0166e-05
comp2264469_c0_seq6	-3.61139	0.836475	22.6301	1.9638e-06	8.09448e-05
gnl|Pdu_trscr_assembly_1|2304	-2.3769	4.43921	22.6258	1.96823e-06	8.09857e-05
comp2275645_c1_seq5	-2.03783	2.89163	22.6256	1.9684e-06	8.09857e-05
comp2277634_c0_seq5	-2.34287	2.06273	22.6246	1.96946e-06	8.09857e-05
comp2227194_c1_seq1	-2.90241	1.22749	22.6147	1.97965e-06	8.12879e-05
comp2273350_c0_seq1	-1.61438	3.67319	22.614	1.98041e-06	8.12879e-05
comp2273178_c0_seq1	-2.00007	2.81382	22.6129	1.98149e-06	8.12879e-05
comp2238294_c0_seq3	-7.20265	-0.56359	22.6087	1.98588e-06	8.14038e-05
comp2274969_c0_seq7	1.58439	3.89712	22.5936	2.00154e-06	8.19814e-05
comp2259092_c1_seq1	-8.11444	-0.488162	22.5909	2.00431e-06	8.20141e-05
comp2238162_c0_seq2	3.24069	0.0794931	22.5898	2.00549e-06	8.20141e-05
comp2263067_c0_seq4	-1.91812	7.04781	22.5789	2.01689e-06	8.24155e-05
comp2257543_c0_seq2	2.03317	3.78405	22.576	2.01989e-06	8.24732e-05
comp2265766_c0_seq7	-3.09513	0.690955	22.5634	2.03327e-06	8.29544e-05
comp2272637_c0_seq5	-2.48023	2.95284	22.5508	2.04655e-06	8.3431e-05
comp2274909_c0_seq7	-2.57128	12.9761	22.5403	2.05778e-06	8.38233e-05
comp2274856_c0_seq3	-2.85779	0.521438	22.5136	2.08659e-06	8.49304e-05
comp2257886_c1_seq1	-3.67506	-0.528555	22.5039	2.09717e-06	8.52941e-05
comp2193984_c0_seq1	2.96036	-0.797817	22.4772	2.12657e-06	8.64224e-05
comp2274190_c0_seq1	1.93053	5.94023	22.471	2.13342e-06	8.66332e-05
comp2277084_c0_seq2	-2.99033	2.07099	22.4635	2.14172e-06	8.68606e-05
comp2265988_c1_seq1	-3.63582	0.503346	22.463	2.14236e-06	8.68606e-05
comp2277003_c1_seq5	-2.53289	3.39285	22.4502	2.15658e-06	8.7369e-05
gnl|Pdu_trscr_assembly_1|9255	-2.58071	1.11218	22.4452	2.16224e-06	8.75304e-05
comp2263854_c0_seq1	2.34319	3.74071	22.4388	2.1695e-06	8.76984e-05
comp2263959_c0_seq1	-2.06722	4.51227	22.4385	2.16976e-06	8.76984e-05
comp2248643_c1_seq1	3.13096	2.93408	22.379	2.2381e-06	9.03903e-05
comp2262281_c0_seq3	-2.54483	7.99607	22.3772	2.2402e-06	9.04049e-05
comp2261386_c0_seq1	2.04045	3.65047	22.375	2.2428e-06	9.04399e-05
comp2266932_c0_seq2	1.54851	5.9657	22.3594	2.261e-06	9.10561e-05
comp2249854_c0_seq1	-3.09344	2.80984	22.3589	2.26158e-06	9.10561e-05
comp2275933_c0_seq1	-1.72246	5.32315	22.3429	2.2806e-06	9.16853e-05
comp2272272_c1_seq2	-2.94326	7.11479	22.3427	2.28073e-06	9.16853e-05
comp2266644_c0_seq1	-1.8065	2.35521	22.3382	2.28608e-06	9.18296e-05
comp2268078_c0_seq2	-1.5496	4.78603	22.3358	2.289e-06	9.18723e-05
comp2270180_c0_seq1	1.82762	2.93409	22.3344	2.29068e-06	9.18723e-05
comp2260341_c1_seq1	-3.95275	0.664845	22.3147	2.31427e-06	9.27473e-05
comp2206896_c0_seq1	4.21972	-2.17952	22.2892	2.34522e-06	9.39066e-05
comp2271898_c0_seq1	-1.73664	3.93209	22.2879	2.34681e-06	9.39066e-05
comp2276182_c0_seq1	-1.50541	4.43893	22.2856	2.34963e-06	9.39472e-05
comp2270680_c0_seq2	1.74966	3.39877	22.2815	2.35467e-06	9.40767e-05
comp2269301_c0_seq2	-2.28724	1.94624	22.2732	2.36482e-06	9.44095e-05
comp2269661_c1_seq3	-1.36668	4.60198	22.2694	2.36951e-06	9.45245e-05
comp2271284_c0_seq4	2.90023	1.68607	22.2668	2.3727e-06	9.45792e-05
comp2265100_c0_seq2	-2.8695	1.19706	22.2579	2.38374e-06	9.49465e-05
comp2270674_c0_seq3	-2.14172	1.62632	22.2544	2.38817e-06	9.50503e-05
comp2227525_c0_seq3	3.45951	-1.96337	22.2504	2.39307e-06	9.51726e-05
comp2268964_c0_seq1	-2.03011	4.11296	22.2453	2.39941e-06	9.53517e-05
comp2239485_c0_seq1	-8.30877	-1.54091	22.2435	2.40168e-06	9.53694e-05
comp2275101_c0_seq4	2.08377	4.23019	22.2242	2.42592e-06	9.62584e-05
comp2253104_c0_seq2	-2.97193	1.97198	22.221	2.43003e-06	9.63482e-05
comp1956628_c0_seq1	3.1202	0.810663	22.218	2.43384e-06	9.64256e-05
comp2263314_c1_seq1	-3.12849	2.0133	22.1984	2.45878e-06	9.73398e-05
comp2270754_c0_seq3	-3.03667	3.12854	22.1709	2.4943e-06	9.86707e-05
comp2272248_c0_seq2	-2.02412	3.10095	22.1624	2.50538e-06	9.90337e-05
comp2277913_c2_seq2	-2.47618	2.44227	22.1544	2.51576e-06	9.93688e-05
comp2269321_c1_seq1	-1.51288	4.45516	22.151	2.5203e-06	9.94726e-05
comp2269322_c0_seq1	-2.26915	3.74538	22.1299	2.54805e-06	0.000100492
comp2274562_c0_seq1	-1.59113	4.20976	22.0921	2.59875e-06	0.000102342
comp2238090_c0_seq1	3.12568	-0.968002	22.092	2.59891e-06	0.000102342
comp2232518_c0_seq1	2.31184	2.95113	22.088	2.60437e-06	0.00010248
comp2273124_c0_seq4	-2.21901	1.80146	22.0828	2.61134e-06	0.00010267
comp2259069_c0_seq3	-2.42575	2.44251	22.0815	2.61315e-06	0.00010267
comp2273815_c0_seq4	-2.46889	0.891738	22.0801	2.61513e-06	0.00010267
comp2268946_c0_seq1	-2.65243	2.02555	22.0583	2.64495e-06	0.000103763
comp2273076_c1_seq5	1.42849	5.36977	22.0398	2.67061e-06	0.000104691
comp2273595_c0_seq1	-2.22755	4.81815	22.0272	2.68817e-06	0.0001053
comp2146773_c0_seq2	5.48843	-3.15819	22.0107	2.71128e-06	0.000106068
comp2243988_c0_seq1	-2.03112	2.52432	22.0103	2.71186e-06	0.000106068
comp2278087_c0_seq7	1.66941	4.49542	21.9964	2.73168e-06	0.000106709
comp2259658_c0_seq4	-2.52142	0.862212	21.9959	2.73234e-06	0.000106709
comp2236190_c0_seq1	3.67367	-0.64607	21.9773	2.75897e-06	0.000107668
comp2276285_c0_seq3	-2.06521	2.81804	21.9757	2.76125e-06	0.000107676
comp2277297_c1_seq4	1.68505	3.2494	21.9696	2.77003e-06	0.000107938
comp2243881_c0_seq1	-2.0152	1.55862	21.9577	2.7872e-06	0.000108526
comp2273850_c0_seq31	-2.37985	2.26098	21.9414	2.81104e-06	0.000109372
comp2272495_c0_seq1	1.5326	6.61761	21.9191	2.84394e-06	0.00011057
comp2258198_c0_seq1	-1.59893	2.5842	21.9155	2.84929e-06	0.000110695
comp2212006_c0_seq1	6.75948	-3.32693	21.898	2.87528e-06	0.000111621
comp2248177_c1_seq1	-2.72822	0.512796	21.8859	2.89346e-06	0.000112243
comp2267060_c0_seq1	-2.32765	2.88976	21.883	2.89784e-06	0.000112329
comp2257439_c0_seq1	-2.49562	0.983521	21.874	2.91149e-06	0.000112715
comp2242993_c0_seq2	2.27385	3.73384	21.8736	2.91211e-06	0.000112715
comp2256252_c0_seq1	-1.59217	9.09184	21.8689	2.91925e-06	0.000112907
comp2277503_c1_seq4	1.72566	2.77919	21.8643	2.92629e-06	0.000113096
comp2251310_c0_seq4	-2.03475	2.1149	21.8604	2.93226e-06	0.000113242
comp2264156_c0_seq1	-1.68505	3.70252	21.8451	2.9557e-06	0.000114063
comp2223620_c0_seq1	3.3089	0.510408	21.8359	2.96988e-06	0.000114525
comp2258794_c0_seq1	2.65721	0.875677	21.826	2.98532e-06	0.000115035
comp2272915_c1_seq7	-1.61017	2.94274	21.8107	3.00924e-06	0.000115871
comp2259138_c0_seq2	2.47071	0.848188	21.8072	3.01469e-06	0.000115995
comp2246287_c0_seq3	2.11307	0.813378	21.7961	3.03222e-06	0.000116584
comp2238068_c1_seq2	-3.8227	0.100411	21.793	3.03712e-06	0.000116686
comp2277456_c0_seq1	1.93977	6.01667	21.7902	3.04149e-06	0.000116768
comp2262372_c0_seq1	-1.98303	1.76549	21.7839	3.05154e-06	0.000117067
comp2259351_c0_seq1	-1.72528	2.23129	21.782	3.05454e-06	0.000117096
comp2278217_c0_seq3	-3.98988	6.58561	21.7769	3.06261e-06	0.000117244
comp2278048_c0_seq4	2.25355	4.58806	21.7767	3.0629e-06	0.000117244
comp2272937_c0_seq1	-1.4314	5.81214	21.7724	3.06983e-06	0.000117423
comp2277062_c1_seq2	3.24737	1.72862	21.7579	3.09307e-06	0.000118225
comp2276498_c2_seq1	-2.84755	3.02858	21.7465	3.11164e-06	0.000118847
comp2243948_c0_seq4	2.09211	1.9804	21.7444	3.11502e-06	0.000118889
comp2252205_c0_seq1	2.11297	3.12619	21.7343	3.13137e-06	0.000119426
comp2270326_c0_seq1	1.60783	6.03889	21.7184	3.15747e-06	0.000120333
comp2258892_c0_seq1	-1.98269	3.40508	21.7076	3.17536e-06	0.000120926
comp2269458_c0_seq2	2.7101	0.888067	21.6963	3.194e-06	0.000121547
comp2275466_c0_seq14	1.64454	4.92462	21.6756	3.22877e-06	0.00012278
gnl|Pdu_trscr_assembly_1|95352	-2.58223	0.792873	21.6688	3.24022e-06	0.000123126
comp2273174_c1_seq4	-3.07774	2.02795	21.6578	3.25889e-06	0.000123745
comp1193815_c0_seq1	4.33447	-1.45012	21.6481	3.27539e-06	0.000124281
comp2267864_c0_seq3	-3.15886	0.152388	21.6392	3.29052e-06	0.000124764
comp2256304_c0_seq1	-2.95705	0.945555	21.6307	3.30519e-06	0.000125229
comp2269448_c0_seq4	-2.12981	2.87008	21.6203	3.32324e-06	0.000125821
comp2257617_c0_seq6	2.39532	4.17928	21.5987	3.36072e-06	0.000127148
gnl|Pdu_trscr_assembly_1|14998	-2.25749	1.55838	21.5841	3.38647e-06	0.000128029
comp2276910_c0_seq34	1.7047	6.7934	21.5497	3.44781e-06	0.000130254
comp2275684_c0_seq21	-1.8929	2.58352	21.5367	3.47114e-06	0.00013104
gnl|Pdu_trscr_assembly_1|16516	-1.85379	2.53164	21.5294	3.48452e-06	0.00013145
comp2200791_c0_seq1	-1.92815	4.72886	21.515	3.51079e-06	0.000132345
gnl|Pdu_trscr_assembly_1|90842	-2.43276	2.13778	21.5113	3.51756e-06	0.000132504
comp2264106_c0_seq1	-1.75389	5.34308	21.5081	3.52338e-06	0.000132627
comp2270771_c0_seq1	-2.13003	4.3106	21.5019	3.53476e-06	0.000132863
comp2261723_c0_seq1	2.33553	4.63702	21.5017	3.53523e-06	0.000132863
comp2265750_c1_seq1	-2.27008	2.88643	21.5005	3.5373e-06	0.000132863
comp2260181_c0_seq1	-3.66269	-0.571159	21.4954	3.54671e-06	0.000133121
comp2276694_c1_seq5	-2.68682	2.17177	21.4925	3.55207e-06	0.000133226
comp2276790_c0_seq3	-2.21676	4.81982	21.491	3.55484e-06	0.000133234
comp2272566_c1_seq3	-1.57035	4.32418	21.4834	3.56907e-06	0.000133671
comp2274017_c0_seq3	-1.88443	4.06937	21.4744	3.58589e-06	0.000134204
comp2273204_c0_seq26	-1.37272	7.90792	21.4669	3.59991e-06	0.000134632
comp2141175_c0_seq1	-1.94603	2.50231	21.4647	3.60406e-06	0.00013469
comp2254606_c0_seq2	2.05042	1.67045	21.4578	3.61696e-06	0.000135075
comp2266758_c1_seq1	-2.14724	5.53822	21.4545	3.62323e-06	0.000135213
comp2261098_c0_seq1	2.79824	0.158287	21.4525	3.62706e-06	0.000135242
comp2256945_c0_seq3	3.49875	-1.01423	21.4513	3.62921e-06	0.000135242
comp2267481_c0_seq3	1.94211	0.623007	21.4469	3.63755e-06	0.000135456
comp2255160_c0_seq1	-4.01942	0.230802	21.4284	3.67283e-06	0.000136672
comp2229846_c0_seq1	3.82833	4.07165	21.4252	3.67907e-06	0.000136806
comp2252877_c0_seq4	-2.19422	2.48615	21.4031	3.72171e-06	0.000138293
comp2278201_c1_seq1	2.12109	3.60697	21.388	3.75116e-06	0.000139288
comp2258637_c0_seq3	-2.66726	0.621668	21.3857	3.75563e-06	0.000139323
comp2242815_c0_seq1	-2.93599	0.94549	21.3847	3.75758e-06	0.000139323
comp2261399_c0_seq2	-5.43213	3.18207	21.3834	3.76012e-06	0.000139323
comp1901146_c0_seq1	3.44075	-1.00997	21.3803	3.76627e-06	0.000139451
comp2272059_c1_seq1	1.4884	6.50251	21.3672	3.7921e-06	0.000140308
comp2261469_c0_seq1	-2.79261	5.53943	21.3348	3.85666e-06	0.000142595
comp2258219_c0_seq1	4.53884	-1.95972	21.3326	3.86116e-06	0.00014266
comp2275652_c0_seq2	-1.72711	4.10733	21.3311	3.86413e-06	0.000142668
comp2250341_c0_seq1	-1.74561	2.35558	21.327	3.87235e-06	0.000142829
comp2265162_c0_seq2	1.72941	1.73034	21.3262	3.87395e-06	0.000142829
comp2272627_c0_seq1	-1.61539	2.87544	21.3102	3.90648e-06	0.000143926
comp2277689_c0_seq2	1.608	7.83318	21.2957	3.93622e-06	0.000144919
comp2264334_c0_seq1	2.5001	3.76135	21.2898	3.94822e-06	0.000145258
comp2265029_c1_seq4	1.34465	5.92324	21.2884	3.95117e-06	0.000145264
comp2220677_c0_seq1	3.46651	4.10931	21.2791	3.97044e-06	0.000145869
comp2269145_c0_seq2	-2.2732	3.4612	21.2696	3.99017e-06	0.000146491
comp2267522_c0_seq1	1.81603	3.52157	21.2541	4.02259e-06	0.000147571
comp2267288_c1_seq6	2.45478	0.483169	21.2528	4.02525e-06	0.000147571
comp2246453_c0_seq1	-2.50685	4.18295	21.2496	4.03186e-06	0.000147709
comp2250204_c0_seq1	-3.61945	-0.100533	21.2388	4.05468e-06	0.000148441
comp2272491_c1_seq4	-2.52654	3.48654	21.2361	4.06049e-06	0.000148549
comp2259053_c0_seq4	-2.26539	1.08678	21.2324	4.06839e-06	0.000148733
comp2276561_c0_seq4	-3.1173	6.79649	21.2257	4.08246e-06	0.000149143
comp2034347_c0_seq1	6.27022	0.128743	21.2214	4.09161e-06	0.000149373
comp2270956_c1_seq4	-1.68701	3.60373	21.2194	4.0959e-06	0.000149382
comp2254585_c0_seq3	1.4703	5.22972	21.2186	4.09761e-06	0.000149382
comp2258025_c0_seq4	-2.64324	0.491948	21.2145	4.10655e-06	0.000149603
comp2274786_c0_seq2	-3.01899	1.88283	21.2119	4.11207e-06	0.0001497
comp2270216_c0_seq10	2.53625	3.84318	21.2027	4.13178e-06	0.000150312
comp2262891_c0_seq3	-3.26738	-0.0527631	21.193	4.15269e-06	0.000150967
comp2239992_c0_seq1	1.66743	2.97811	21.1851	4.16996e-06	0.000151489
comp2251833_c0_seq1	2.38528	-0.784895	21.1791	4.18302e-06	0.000151858
comp2260503_c0_seq2	1.77565	3.61961	21.1761	4.18964e-06	0.000151992
comp2277878_c2_seq6	-1.48178	3.69966	21.1692	4.20472e-06	0.000152433
comp2260417_c1_seq1	-3.71056	-1.14621	21.1671	4.20934e-06	0.000152494
comp2267610_c1_seq1	-1.8248	3.1847	21.1568	4.23205e-06	0.00015321
comp2232050_c0_seq1	-2.10546	1.90196	21.146	4.25594e-06	0.000153968
comp2269058_c3_seq2	-2.0771	1.51627	21.1385	4.27261e-06	0.000154464
comp2270432_c0_seq1	-1.45703	6.49837	21.1038	4.35071e-06	0.000157083
comp2224691_c1_seq1	4.43298	-2.19162	21.1036	4.3511e-06	0.000157083
comp2277716_c1_seq2	1.68625	3.35064	21.0818	4.40091e-06	0.000158687
comp2268718_c0_seq1	-3.16022	1.21254	21.0815	4.40163e-06	0.000158687
comp2277231_c1_seq4	1.73905	3.98543	21.0753	4.41594e-06	0.000159093
comp2266783_c1_seq1	2.10258	1.78416	21.0729	4.4214e-06	0.00015918
comp2262867_c0_seq2	1.89215	1.56992	21.0597	4.45195e-06	0.000160169
comp2231158_c0_seq3	-2.06928	2.95237	21.0573	4.45741e-06	0.000160254
comp2248412_c0_seq1	-3.88978	-0.361295	21.047	4.48146e-06	0.000161008
comp2263170_c0_seq1	-2.94012	0.350825	21.0454	4.48525e-06	0.000161033
comp2284150_c0_seq1	-2.45192	3.99186	21.0333	4.51382e-06	0.000161947
comp2259837_c0_seq2	-2.08346	2.63759	21.014	4.55935e-06	0.000163397
comp2263661_c0_seq1	-1.51623	5.66911	21.0135	4.56052e-06	0.000163397
comp2275530_c0_seq7	2.33971	4.9141	21.01	4.56886e-06	0.000163583
comp2264817_c0_seq1	-2.31298	1.75756	20.9849	4.62916e-06	0.000165629
comp2277331_c1_seq5	1.64995	5.10424	20.9808	4.63909e-06	0.00016587
comp2260225_c1_seq2	-2.72234	4.29601	20.9771	4.64795e-06	0.000166072
comp2269908_c0_seq1	2.86835	1.54997	20.9648	4.67806e-06	0.000167034
comp2274684_c0_seq22	1.62794	5.00542	20.9614	4.68621e-06	0.00016721
comp2212838_c1_seq1	-3.70321	0.170745	20.9516	4.71039e-06	0.000167958
comp2272224_c0_seq1	-2.56549	0.779512	20.9496	4.71538e-06	0.00016802
comp2269401_c0_seq1	1.55499	4.42776	20.9378	4.74451e-06	0.000168943
comp2267788_c0_seq5	1.57846	6.1586	20.9232	4.78076e-06	0.000170087
comp2268065_c0_seq1	2.36876	0.994569	20.9222	4.78317e-06	0.000170087
comp2277921_c0_seq1	1.61167	6.16406	20.9195	4.78997e-06	0.000170212
comp2254076_c0_seq1	3.00492	-1.29113	20.9116	4.80964e-06	0.000170795
comp2277771_c0_seq4	-1.4442	4.64117	20.902	4.83395e-06	0.000171541
comp2275898_c0_seq1	-1.49194	3.47765	20.8965	4.84787e-06	0.000171918
comp2271573_c0_seq1	-1.82828	2.19359	20.8884	4.86828e-06	0.000172524
comp2272414_c0_seq2	-2.92243	2.22931	20.8866	4.87298e-06	0.000172573
comp2277360_c0_seq2	-1.44985	4.58218	20.878	4.89482e-06	0.000173229
comp2275628_c0_seq16	-1.63372	3.4786	20.8742	4.90467e-06	0.00017346
comp2203146_c0_seq1	-1.85281	2.67151	20.8637	4.93164e-06	0.000174295
comp2237760_c0_seq1	-4.28444	-0.0657879	20.8575	4.94758e-06	0.00017474
comp2275437_c0_seq1	2.63584	0.187678	20.8461	4.97702e-06	0.00017566
comp2265504_c0_seq1	2.11212	1.42862	20.8434	4.98403e-06	0.000175788
comp2277899_c0_seq2	2.02351	1.68509	20.8408	4.9909e-06	0.000175912
comp2263612_c1_seq1	-2.60127	4.76323	20.8346	5.00704e-06	0.000176323
comp2273537_c0_seq3	-1.91897	2.45956	20.8334	5.01011e-06	0.000176323
comp2272414_c1_seq4	-2.68305	2.18321	20.8324	5.01273e-06	0.000176323
comp2238789_c0_seq1	2.49485	1.05315	20.825	5.03205e-06	0.000176883
comp2260998_c0_seq3	2.38716	0.806462	20.8154	5.05736e-06	0.000177653
comp2275531_c0_seq2	-1.63472	3.68625	20.8101	5.07142e-06	0.000178026
comp2251922_c0_seq3	-3.27545	-0.0394508	20.7935	5.11576e-06	0.000179462
comp2263251_c1_seq2	2.2491	0.318642	20.7915	5.12089e-06	0.000179513
comp2261825_c0_seq1	1.70793	2.66506	20.7903	5.12412e-06	0.000179513
comp2257131_c0_seq2	1.78617	4.94044	20.7881	5.13003e-06	0.000179599
comp2264329_c0_seq2	-2.28925	1.54807	20.781	5.14908e-06	0.000180145
comp2277510_c2_seq1	-2.2461	4.8256	20.7627	5.19859e-06	0.000181739
comp2260209_c0_seq1	1.81179	2.02751	20.7616	5.20163e-06	0.000181739
comp2263235_c0_seq3	-3.06814	-0.603222	20.7586	5.2098e-06	0.000181903
comp2272881_c0_seq1	2.07587	1.93691	20.7486	5.23706e-06	0.000182732
comp2277368_c0_seq3	-1.87992	5.25284	20.7461	5.24373e-06	0.000182827
comp2273758_c1_seq1	2.69211	3.88555	20.745	5.24682e-06	0.000182827
comp2253402_c0_seq1	-1.66745	2.40427	20.7387	5.26418e-06	0.00018331
comp2277188_c0_seq1	-1.81331	3.82879	20.7348	5.27483e-06	0.000183558
comp2256031_c0_seq1	-4.53644	0.711461	20.7332	5.27919e-06	0.000183587
comp2271799_c0_seq3	2.72995	1.81899	20.7262	5.29852e-06	0.000184136
comp2258303_c0_seq2	-3.18213	0.0264545	20.7236	5.30568e-06	0.000184262
comp2273472_c0_seq1	1.93849	3.67331	20.7138	5.33297e-06	0.000185086
comp2198481_c0_seq1	-7.90432	-1.45107	20.7056	5.35593e-06	0.000185759
comp2248859_c2_seq1	-3.2257	0.444787	20.7039	5.36068e-06	0.0001858
comp2141733_c0_seq1	-2.091	2.50929	20.6871	5.40786e-06	0.000187311
comp2277514_c0_seq1	-1.79854	2.5168	20.6773	5.43563e-06	0.000188147
comp2279484_c0_seq1	-1.92234	3.74883	20.6699	5.45665e-06	0.000188749
comp2266217_c0_seq8	2.83487	4.35523	20.6546	5.5005e-06	0.00019014
comp2270435_c0_seq1	-2.1887	3.14684	20.6495	5.51507e-06	0.000190517
comp2239036_c0_seq1	-3.16868	1.20872	20.6416	5.53788e-06	0.000191178
comp2237921_c0_seq1	-2.97102	-0.107336	20.6389	5.54589e-06	0.000191328
comp2261606_c0_seq1	1.79013	2.62732	20.6299	5.57193e-06	0.000192099
comp2271645_c0_seq1	-1.70847	3.71566	20.6173	5.60872e-06	0.000193239
comp2269637_c0_seq4	-3.23582	1.33193	20.6141	5.61805e-06	0.000193433
comp2277719_c1_seq3	-2.29409	3.17994	20.6117	5.6252e-06	0.000193551
comp2275887_c0_seq1	-1.68646	2.68913	20.6068	5.63944e-06	0.000193795
comp1194244_c0_seq1	-3.23362	4.57987	20.6067	5.63975e-06	0.000193795
comp2277581_c0_seq10	2.05995	3.34658	20.6007	5.6575e-06	0.000194277
comp2276678_c0_seq7	1.57505	5.86143	20.5966	5.66963e-06	0.000194565
comp2221813_c0_seq2	-1.72421	4.15748	20.5842	5.70638e-06	0.000195583
comp2278485_c0_seq1	-1.52769	6.93918	20.5841	5.70681e-06	0.000195583
comp2246831_c0_seq2	-3.55181	-0.355881	20.5766	5.72933e-06	0.000196226
comp2256678_c0_seq1	3.10557	3.36508	20.5673	5.75718e-06	0.00019705
comp2269476_c0_seq1	2.40218	4.42534	20.5635	5.76844e-06	0.000197306
comp2270492_c1_seq1	-3.19194	1.18132	20.5602	5.77848e-06	0.000197519
comp2263912_c0_seq4	-3.32649	-0.0628921	20.5354	5.85388e-06	0.000199965
comp2252128_c0_seq9	1.41895	5.71852	20.5306	5.86848e-06	0.000200285
comp2138805_c0_seq2	-2.82512	-0.385556	20.5298	5.87095e-06	0.000200285
comp2271735_c0_seq3	2.24006	3.09538	20.5108	5.92964e-06	0.000202155
comp2141370_c0_seq1	-3.1583	0.109497	20.5042	5.95008e-06	0.000202719
comp2267166_c0_seq2	1.8481	3.96056	20.4956	5.97678e-06	0.000203496
comp2264824_c0_seq5	-2.54821	0.270894	20.4863	6.00604e-06	0.000204358
comp2258284_c0_seq4	-2.63507	3.90309	20.4756	6.03967e-06	0.000205368
comp2253452_c0_seq1	-3.03544	0.288317	20.4668	6.06756e-06	0.000206182
comp2253109_c0_seq2	-2.1203	2.60783	20.4638	6.07711e-06	0.000206294
comp2262404_c0_seq1	-2.20758	1.01605	20.4632	6.07878e-06	0.000206294
comp2261333_c0_seq2	-2.01999	1.20163	20.4367	6.1637e-06	0.00020904
comp2256152_c0_seq2	-2.53191	0.0793913	20.4115	6.24536e-06	0.000211671
comp2274571_c0_seq3	1.66983	5.32718	20.4096	6.2515e-06	0.000211741
comp2261201_c0_seq1	-1.64831	2.97273	20.403	6.27311e-06	0.000212336
comp2199471_c0_seq1	-1.64545	2.29647	20.4017	6.27727e-06	0.000212338
comp2260063_c0_seq1	-3.12534	1.07824	20.3841	6.33532e-06	0.000214163
comp2278405_c0_seq22	-1.98805	9.06236	20.3644	6.40087e-06	0.000216238
comp2262458_c0_seq2	-2.9541	0.796241	20.3533	6.4382e-06	0.000217231
comp2265590_c1_seq4	-2.30784	2.5763	20.3532	6.43862e-06	0.000217231
comp2256355_c0_seq1	-1.78215	8.81646	20.3404	6.48167e-06	0.000218499
gnl|Pdu_trscr_assembly_1|7538	-3.09719	0.184868	20.3396	6.48458e-06	0.000218499
comp2275371_c0_seq2	-1.57772	3.81469	20.3367	6.49414e-06	0.00021868
comp2256364_c0_seq4	-2.43046	1.54556	20.3353	6.49916e-06	0.000218707
comp2065624_c0_seq3	-3.39514	4.32153	20.334	6.50347e-06	0.000218711
comp2257923_c0_seq2	-1.58345	3.48984	20.3314	6.51244e-06	0.000218871
comp2220373_c0_seq1	-7.38026	-1.55317	20.3291	6.52015e-06	0.000218989
comp2277638_c1_seq1	-2.18818	3.56609	20.3202	6.55051e-06	0.000219866
comp2276086_c0_seq5	2.48	2.71365	20.3139	6.57215e-06	0.000220451
comp2261509_c0_seq1	-2.68925	2.35123	20.3066	6.59736e-06	0.000221065
gnl|Pdu_trscr_assembly_1|22197	-1.69762	2.88376	20.3061	6.59895e-06	0.000221065
comp2271509_c1_seq1	-2.35128	1.38311	20.3002	6.61932e-06	0.000221605
comp2267774_c0_seq2	-2.42531	2.29039	20.2775	6.69839e-06	0.000224108
gi|563607183|gb|KF515933.1|_Platynereis_dumerilii_SHM_neuropeptide_precursor,_mRNA,_partial_cds	-3.78488	-0.538583	20.2699	6.72516e-06	0.000224859
comp2270623_c2_seq1	1.6865	3.2214	20.2657	6.73986e-06	0.000225206
gnl|Pdu_trscr_assembly_1|1263	-2.06528	1.69752	20.2424	6.82255e-06	0.000227822
comp1764944_c0_seq1	-3.02608	1.95969	20.2402	6.83027e-06	0.000227826
comp2269208_c0_seq1	-2.16744	2.02539	20.2399	6.83141e-06	0.000227826
comp1847822_c0_seq1	3.42012	-0.92825	20.2373	6.84073e-06	0.000227991
comp2276784_c0_seq5	-2.18968	5.33067	20.2325	6.85787e-06	0.000228416
comp2277065_c0_seq11	-2.13569	3.30906	20.2254	6.88322e-06	0.00022898
comp2267069_c0_seq2	-2.14607	1.84077	20.2253	6.8836e-06	0.00022898
comp2279863_c0_seq1	4.31477	-2.43012	20.223	6.89186e-06	0.000229108
comp2231206_c0_seq1	-3.10308	0.730038	20.2153	6.91974e-06	0.000229888
comp2274657_c0_seq1	1.49456	4.90592	20.1995	6.97707e-06	0.000231645
comp2227117_c0_seq2	-1.31311	4.91346	20.1948	6.99427e-06	0.000232068
comp2273699_c0_seq8	2.15846	0.878423	20.1917	7.0055e-06	0.000232292
comp2254551_c0_seq1	1.7375	1.43653	20.1904	7.01048e-06	0.00023231
comp2273876_c0_seq8	1.48424	3.44632	20.1775	7.05784e-06	0.00023373
comp2264309_c2_seq3	-3.39894	-0.310056	20.1681	7.09252e-06	0.000234729
comp2277924_c1_seq2	1.82334	4.76847	20.1644	7.10624e-06	0.000235034
comp2274498_c0_seq1	-1.97717	1.44141	20.1363	7.21135e-06	0.000238359
comp2267040_c0_seq2	2.59712	3.62475	20.1242	7.25743e-06	0.000239669
comp2277538_c0_seq1	-2.36319	0.989501	20.1234	7.2602e-06	0.000239669
comp2245969_c0_seq1	-1.42566	5.29805	20.1173	7.28361e-06	0.00024029
comp2274259_c0_seq1	-1.29085	4.85557	20.1147	7.29334e-06	0.000240459
comp2235003_c0_seq2	2.58686	1.87817	20.1064	7.32507e-06	0.000241217
comp2266864_c0_seq1	2.00502	3.37225	20.1063	7.3256e-06	0.000241217
comp2269694_c0_seq2	-1.49729	3.43168	20.1028	7.33904e-06	0.000241506
comp1192792_c0_seq1	4.4945	-0.944748	20.0994	7.35193e-06	0.000241778
comp2140636_c0_seq1	-1.57037	2.96593	20.0951	7.36864e-06	0.000242174
comp2274386_c0_seq5	2.14213	3.97879	20.0761	7.4419e-06	0.000244428
comp2267061_c1_seq8	2.45182	4.93314	20.0736	7.45178e-06	0.000244598
comp2262222_c0_seq5	2.04967	0.536456	20.0582	7.51191e-06	0.000246416
comp2278215_c0_seq13	-1.53039	5.07796	20.0509	7.54077e-06	0.000247207
comp2269186_c0_seq3	-1.35645	4.05443	20.0368	7.59651e-06	0.000248878
comp2235392_c0_seq1	1.49959	4.53365	20.0329	7.61193e-06	0.000249205
comp2269305_c0_seq1	-1.2928	6.31849	20.0319	7.61608e-06	0.000249205
comp2263631_c0_seq4	3.27856	-0.536586	20.0253	7.6426e-06	0.000249916
comp2265991_c0_seq1	2.15498	3.56989	20.0167	7.67684e-06	0.000250878
comp2262947_c0_seq2	-2.41492	2.22517	20.0012	7.73941e-06	0.000252764
comp2277189_c4_seq1	-2.47684	1.66025	19.9961	7.75998e-06	0.000253148
comp2246100_c0_seq3	-6.01084	0.0975457	19.9959	7.7609e-06	0.000253148
comp2206764_c0_seq1	3.29059	3.45894	19.9929	7.77315e-06	0.000253389
comp2246244_c0_seq1	3.40632	2.88996	19.9841	7.80908e-06	0.000254401
comp2250584_c1_seq1	-3.36778	-0.142416	19.9698	7.86769e-06	0.00025615
comp2258887_c0_seq1	-2.78553	-0.0146302	19.9664	7.88169e-06	0.000256446
comp2254521_c0_seq3	-2.73987	3.54984	19.9636	7.89299e-06	0.000256653
comp2268827_c0_seq4	1.87797	1.00507	19.9622	7.89867e-06	0.000256677
comp2269060_c0_seq1	-3.216	6.59491	19.9503	7.94835e-06	0.000258131
comp2269850_c0_seq1	-2.15719	5.63961	19.9468	7.96291e-06	0.000258442
comp2252365_c0_seq1	3.00355	0.365237	19.9346	8.01366e-06	0.000259927
comp2276934_c0_seq1	-1.60377	3.41876	19.9281	8.04102e-06	0.000260652
comp2234777_c0_seq2	3.70481	-0.650671	19.9251	8.05361e-06	0.000260811
comp2266856_c0_seq21	-3.51033	-0.0899114	19.9245	8.05592e-06	0.000260811
comp2258907_c0_seq2	2.12048	1.38523	19.9229	8.0628e-06	0.000260871
comp2265985_c0_seq3	-2.31434	1.79712	19.9201	8.07475e-06	0.000261095
comp2262778_c0_seq2	3.52578	5.15151	19.9164	8.09045e-06	0.000261441
comp1207973_c0_seq1	-2.71075	3.81844	19.9104	8.11576e-06	0.000262096
comp2276278_c0_seq2	-1.43249	3.80475	19.907	8.1304e-06	0.000262406
comp1991283_c0_seq1	-2.00418	2.06228	19.8825	8.23498e-06	0.000265616
comp2259975_c0_seq2	2.13538	3.19117	19.8693	8.29212e-06	0.000267177
comp2138075_c0_seq1	-8.4441	-1.09303	19.869	8.29363e-06	0.000267177
comp2278200_c1_seq2	-1.79697	2.9323	19.8629	8.32002e-06	0.000267861
comp2268598_c0_seq1	-1.91461	2.41938	19.854	8.35886e-06	0.000268945
gnl|Pdu_trscr_assembly_1|7485	1.62058	1.91097	19.8515	8.36966e-06	0.000269127
comp1975390_c0_seq1	-2.22223	2.78196	19.8482	8.3843e-06	0.000269431
comp2275341_c0_seq11	-1.34363	5.49178	19.8448	8.39917e-06	0.000269742
comp2272497_c1_seq1	-2.78409	1.56299	19.8418	8.41233e-06	0.000269998
comp2269929_c1_seq2	1.55023	4.01099	19.8378	8.43003e-06	0.0002704
comp2259091_c0_seq3	2.27302	-0.433771	19.8236	8.49264e-06	0.00027224
comp2273755_c0_seq2	2.24381	3.23886	19.8166	8.52379e-06	0.000273071
comp2271099_c0_seq5	1.88189	0.543046	19.8103	8.55199e-06	0.000273768
comp2254544_c0_seq2	-3.67703	1.41622	19.8094	8.55606e-06	0.000273768
comp2259621_c0_seq1	-2.27092	1.82365	19.8075	8.5644e-06	0.000273789
comp2261982_c0_seq2	-1.91307	2.07266	19.8069	8.56725e-06	0.000273789
comp2276206_c0_seq14	-1.85761	6.80645	19.8026	8.58637e-06	0.000274232
comp2237007_c0_seq2	2.03382	1.77874	19.7977	8.60857e-06	0.000274772
comp2278288_c0_seq4	2.69988	2.7091	19.7959	8.61693e-06	0.000274836
comp2268847_c0_seq1	2.38762	0.530362	19.7949	8.62113e-06	0.000274836
comp2276702_c0_seq2	-1.4214	4.87643	19.7867	8.6581e-06	0.00027572
comp2272576_c1_seq4	-1.55075	4.93809	19.7864	8.65945e-06	0.00027572
comp2276298_c0_seq2	-1.61655	2.79705	19.7837	8.67188e-06	0.000275947
comp2273614_c0_seq1	2.97939	-0.0357248	19.7821	8.67932e-06	0.000276015
comp2274598_c0_seq1	-1.9427	1.48239	19.7757	8.70812e-06	0.000276708
comp2245003_c0_seq1	2.01837	4.93593	19.7749	8.71174e-06	0.000276708
comp2272254_c0_seq4	-2.01769	5.03048	19.7725	8.72284e-06	0.000276892
comp2265682_c0_seq1	3.84201	0.0432571	19.7667	8.74925e-06	0.000277561
comp2276042_c0_seq1	1.89616	2.82898	19.7569	8.79445e-06	0.000278825
comp2274290_c1_seq1	-2.322	1.92289	19.7395	8.87482e-06	0.000281201
comp2245660_c0_seq4	-4.56377	-0.468719	19.731	8.9143e-06	0.000282281
comp2265366_c0_seq1	1.72769	3.028	19.7201	8.96543e-06	0.000283727
comp2271751_c1_seq3	-2.05821	1.84257	19.704	9.04125e-06	0.000285866
comp2267716_c0_seq2	2.2844	4.66665	19.7034	9.04399e-06	0.000285866
comp2271490_c0_seq2	-2.10329	2.81958	19.6998	9.06098e-06	0.000286229
comp2257713_c0_seq1	-1.79291	2.90962	19.6976	9.07165e-06	0.000286392
comp2265669_c0_seq1	-2.49727	0.220351	19.6918	9.09903e-06	0.000287083
comp2272739_c1_seq4	-1.87589	2.6971	19.6779	9.16559e-06	0.000288866
comp2246102_c0_seq1	-3.25215	1.37579	19.6777	9.16663e-06	0.000288866
comp2273515_c0_seq1	-1.90922	1.87787	19.6747	9.18107e-06	0.00028914
comp2269573_c0_seq2	-1.70215	4.47638	19.6728	9.19003e-06	0.00028914
comp2274615_c2_seq13	2.08363	1.53265	19.6715	9.19608e-06	0.00028914
comp2268643_c0_seq1	-2.25504	0.807104	19.6712	9.19756e-06	0.00028914
comp2255078_c0_seq3	4.07126	-2.04362	19.6677	9.21467e-06	0.000289503
comp2254294_c0_seq1	2.15466	2.24665	19.665	9.22747e-06	0.00028973
comp2272574_c0_seq1	-2.42807	1.85574	19.6638	9.23362e-06	0.000289749
comp2273132_c0_seq2	2.45357	-0.386051	19.661	9.24684e-06	0.000289989
comp2267732_c0_seq2	-1.6489	5.91784	19.6451	9.32401e-06	0.000292233
comp2254591_c0_seq2	-2.30875	1.12827	19.6347	9.3752e-06	0.00029366
comp2272081_c0_seq1	-1.76976	2.42336	19.6192	9.45163e-06	0.000295876
comp2272160_c0_seq5	3.13852	5.86369	19.6164	9.46536e-06	0.000296128
comp2271886_c0_seq1	-2.70678	0.255774	19.6109	9.49247e-06	0.000296798
comp1547345_c0_seq1	3.54471	0.103046	19.606	9.51723e-06	0.000297393
comp2270286_c0_seq1	-2.34415	2.75744	19.6028	9.53287e-06	0.000297672
comp2235488_c0_seq1	-3.81132	0.66983	19.6019	9.53758e-06	0.000297672
comp2263882_c0_seq6	-1.85898	4.80997	19.5924	9.58497e-06	0.000298972
comp2273570_c0_seq3	-1.51179	2.99757	19.5836	9.62911e-06	0.000300169
comp2272910_c0_seq1	1.55759	5.14722	19.5812	9.64113e-06	0.000300364
comp2273455_c0_seq2	1.41867	4.27756	19.5709	9.69352e-06	0.000301815
comp2276707_c0_seq1	1.83483	4.43751	19.56	9.74897e-06	0.00030336
comp2258798_c0_seq1	2.35416	0.131341	19.5316	9.89476e-06	0.000307713
comp2262000_c0_seq2	1.84457	2.17812	19.5226	9.94183e-06	0.000308992
comp2244978_c1_seq1	-2.10967	0.851432	19.5189	9.96104e-06	0.000309404
comp2239613_c0_seq2	-2.60985	2.51091	19.5077	1.00196e-05	0.000311039
comp2264505_c0_seq2	-2.64736	1.1153	19.4967	1.00775e-05	0.00031265
comp2270025_c0_seq6	-2.38371	0.838042	19.4729	1.02037e-05	0.000316377
comp2263718_c0_seq2	-2.21165	3.09754	19.4628	1.02578e-05	0.000317761
comp1194375_c0_seq1	-1.81023	1.9655	19.4623	1.02606e-05	0.000317761
comp2275275_c2_seq1	-2.15768	1.05696	19.4579	1.02844e-05	0.000318308
comp2269936_c0_seq1	-1.54772	3.97517	19.4499	1.03272e-05	0.000319444
comp2244959_c0_seq2	-2.00725	3.62853	19.4481	1.03371e-05	0.000319559
comp2276549_c0_seq5	-1.81984	2.14822	19.4462	1.03472e-05	0.000319682
comp2266476_c1_seq1	-2.51711	0.939947	19.4365	1.04e-05	0.000321124
comp2250960_c0_seq4	3.39006	-1.62543	19.4336	1.04157e-05	0.0003214
comp2221605_c0_seq1	-2.91398	2.45928	19.4326	1.04213e-05	0.0003214
comp2107458_c0_seq1	2.52852	1.11322	19.4272	1.04506e-05	0.000322111
comp2258370_c1_seq1	-1.84136	2.22081	19.4227	1.04752e-05	0.00032268
comp2277904_c1_seq1	-4.57567	4.51868	19.4195	1.04929e-05	0.000323032
comp2246994_c0_seq1	-1.6773	3.35952	19.4184	1.0499e-05	0.000323032
comp2264945_c0_seq1	-1.9925	0.872388	19.4107	1.05412e-05	0.000324139
comp2242253_c0_seq1	-3.34376	0.0626204	19.3978	1.06128e-05	0.000326148
comp2276066_c0_seq10	-2.36349	0.752556	19.3781	1.0723e-05	0.000329339
comp2266652_c1_seq5	3.62614	-0.43411	19.3765	1.07317e-05	0.000329413
comp2254498_c0_seq1	-2.11896	2.56083	19.3686	1.07764e-05	0.000330589
comp2275331_c0_seq6	-1.86958	5.79446	19.3551	1.08528e-05	0.000332736
gnl|Pdu_trscr_assembly_1|2283	-1.96406	1.49519	19.3538	1.08601e-05	0.000332764
comp2274018_c0_seq2	1.65938	3.36411	19.3518	1.08714e-05	0.000332915
comp2278311_c0_seq6	-1.81654	4.07317	19.3418	1.09287e-05	0.000334286
comp2269281_c0_seq10	-2.48315	0.458802	19.3417	1.0929e-05	0.000334286
comp2254630_c0_seq2	2.15602	6.90891	19.3319	1.09857e-05	0.000335822
comp2254887_c0_seq1	3.95834	-1.8922	19.3054	1.1139e-05	0.000340309
comp2277394_c0_seq13	-1.57612	2.69191	19.3033	1.11515e-05	0.000340315
comp2265414_c0_seq1	-1.71854	4.51885	19.3027	1.11548e-05	0.000340315
comp2219624_c0_seq2	2.77891	-0.258543	19.302	1.11588e-05	0.000340315
comp2269201_c0_seq1	-2.53317	4.97567	19.2918	1.12188e-05	0.000341943
comp2271381_c1_seq12	-1.57586	6.76255	19.2784	1.12979e-05	0.000344152
comp2259270_c0_seq5	-3.51027	0.460572	19.2745	1.13206e-05	0.000344643
comp1916779_c0_seq1	-1.55144	5.11124	19.2694	1.13509e-05	0.000345362
comp2269506_c0_seq28	1.63386	5.10895	19.2589	1.14135e-05	0.000347065
comp2257109_c0_seq2	-2.65547	1.02992	19.2548	1.14384e-05	0.000347619
comp2269689_c0_seq5	-1.84443	3.10162	19.2299	1.15887e-05	0.00035198
comp2259371_c0_seq2	-3.85109	-0.0339479	19.2152	1.1678e-05	0.000354488
comp2273696_c0_seq2	1.94837	1.49576	19.2131	1.1691e-05	0.000354674
comp2272454_c0_seq1	-2.9945	3.96697	19.203	1.1753e-05	0.000356347
comp2273523_c0_seq3	2.13338	4.77824	19.1994	1.17753e-05	0.000356815
comp2249046_c0_seq1	-7.04181	-1.32688	19.1982	1.17827e-05	0.000356833
comp2274379_c0_seq3	-2.3399	3.39636	19.1948	1.18034e-05	0.000357252
comp2266432_c0_seq1	-2.12492	4.81432	19.1896	1.18357e-05	0.00035802
comp2270618_c0_seq1	-2.96197	3.95767	19.1874	1.18494e-05	0.000358228
gnl|Pdu_trscr_assembly_1|21544	-2.16858	0.757709	19.181	1.18892e-05	0.000359224
gnl|Pdu_trscr_assembly_1|14372	-2.60333	2.52448	19.1796	1.18977e-05	0.000359271
comp2254208_c0_seq1	-1.76831	2.20715	19.178	1.19075e-05	0.000359359
comp2255582_c0_seq1	1.97309	0.541979	19.167	1.19768e-05	0.000361239
comp2252950_c0_seq1	-1.54715	3.11262	19.1533	1.20628e-05	0.000363623
comp2270703_c0_seq5	-1.50259	4.51689	19.1215	1.22654e-05	0.000369517
comp2271734_c0_seq2	2.69392	1.19329	19.1159	1.23013e-05	0.000370383
comp2268682_c0_seq5	-2.01985	1.71028	19.1138	1.23149e-05	0.000370579
comp2264876_c1_seq2	-3.94379	-0.227093	19.0673	1.26191e-05	0.000379513
comp2263669_c0_seq5	1.90532	3.44348	19.0608	1.26622e-05	0.000380589
comp2256027_c0_seq2	-2.84287	1.16035	19.0586	1.26767e-05	0.00038064
comp2265684_c0_seq8	-1.84411	2.20059	19.0583	1.26785e-05	0.00038064
comp2273119_c1_seq7	-1.38996	4.98361	19.052	1.27201e-05	0.00038167
comp2138945_c0_seq1	2.24294	0.880724	19.0478	1.27485e-05	0.000382302
gnl|Pdu_trscr_assembly_1|14840	-2.09859	2.18299	19.0421	1.27868e-05	0.00038323
comp2254332_c0_seq1	-1.96934	1.65631	19.0226	1.29179e-05	0.000386858
comp2267162_c0_seq2	1.85075	3.4405	19.0219	1.29228e-05	0.000386858
comp2261428_c0_seq1	-1.56853	9.88409	19.0183	1.29471e-05	0.000387365
comp2200465_c0_seq2	2.23702	3.96071	19.0031	1.30507e-05	0.000390239
comp2274902_c1_seq5	-2.02161	1.20427	19.0018	1.30594e-05	0.000390274
comp2232024_c0_seq1	2.26127	3.04052	18.9837	1.31839e-05	0.000393771
comp2272976_c0_seq14	-1.38341	3.87691	18.9819	1.31961e-05	0.000393888
comp2272214_c0_seq3	-1.56586	3.19772	18.981	1.3203e-05	0.000393888
comp2256287_c0_seq1	2.30922	3.4025	18.9706	1.3275e-05	0.00039581
comp2257395_c0_seq4	-2.10711	5.66843	18.967	1.33001e-05	0.000396292
comp2260206_c0_seq2	-3.22751	0.201645	18.9661	1.33064e-05	0.000396292
comp2277493_c0_seq7	-1.61399	3.10813	18.9614	1.33392e-05	0.000397041
comp2270492_c0_seq3	-1.8629	5.49	18.9483	1.34311e-05	0.000399532
comp2278605_c0_seq1	-1.97253	4.28383	18.9473	1.34382e-05	0.000399532
comp2248808_c0_seq2	-2.32025	10.3942	18.9426	1.34711e-05	0.000400282
comp2262487_c0_seq2	-1.49832	3.61968	18.9398	1.34911e-05	0.000400648
comp2274463_c0_seq2	-2.40554	2.11079	18.9376	1.35062e-05	0.000400868
comp2275557_c0_seq2	3.01639	0.999952	18.9332	1.35373e-05	0.000401559
comp2271826_c0_seq1	-1.82149	3.2241	18.9269	1.35826e-05	0.000402671
comp2276321_c2_seq4	-1.79285	2.19885	18.9258	1.35902e-05	0.000402671
comp2274767_c0_seq2	-1.49232	2.72589	18.9204	1.36291e-05	0.000403593
comp2254308_c0_seq1	2.12741	3.11365	18.9046	1.37419e-05	0.000406702
comp2273491_c0_seq12	-1.8525	1.95857	18.9025	1.37576e-05	0.000406934
comp2275031_c0_seq1	-3.48863	0.552231	18.8966	1.38001e-05	0.00040796
comp2244049_c0_seq3	3.82468	-0.608599	18.8865	1.38733e-05	0.000409891
comp2215197_c0_seq1	-2.97387	2.12407	18.8826	1.39014e-05	0.000410489
comp2272961_c0_seq1	1.64395	2.92729	18.8811	1.39124e-05	0.000410581
comp2258702_c0_seq6	-2.65593	-0.338677	18.8704	1.39905e-05	0.000412652
comp2248044_c0_seq1	-2.36287	2.54677	18.8558	1.40982e-05	0.000415594
comp2272118_c0_seq11	1.46892	6.47933	18.8462	1.41692e-05	0.000417451
comp2276798_c2_seq4	1.59474	5.00286	18.8347	1.42547e-05	0.00041973
comp2260988_c0_seq4	-2.08417	1.59577	18.8296	1.42932e-05	0.000420626
comp2273470_c1_seq2	1.90951	3.354	18.8138	1.44123e-05	0.000423885
comp2274618_c0_seq5	-3.4545	-0.471338	18.8122	1.44238e-05	0.000423885
comp2266482_c0_seq1	1.57328	4.62647	18.8116	1.44283e-05	0.000423885
comp2257755_c0_seq1	-1.84904	2.05888	18.8048	1.448e-05	0.000425162
comp2276349_c1_seq1	-1.959	7.53284	18.8032	1.44922e-05	0.000425283
comp2273966_c0_seq7	-1.51679	3.06954	18.785	1.4631e-05	0.000429112
comp2254001_c0_seq2	-2.24701	1.1361	18.7748	1.47099e-05	0.000431184
comp2272590_c0_seq1	-1.76087	2.67489	18.7731	1.47228e-05	0.000431319
comp2271478_c0_seq1	-2.04474	1.4373	18.7668	1.47717e-05	0.000432507
comp2266388_c0_seq2	-1.34042	4.2269	18.7649	1.47861e-05	0.000432686
comp2234242_c0_seq1	-4.53519	0.160984	18.7637	1.47957e-05	0.000432725
comp2253899_c0_seq4	-2.94387	-0.241231	18.7623	1.48065e-05	0.000432797
comp2277898_c0_seq9	-2.88014	2.5031	18.756	1.48554e-05	0.000433984
comp2253766_c0_seq10	2.19096	2.31198	18.7473	1.49232e-05	0.000435719
comp2247049_c0_seq3	-2.89047	1.41406	18.7441	1.49488e-05	0.000436073
comp1339124_c0_seq1	-2.83351	5.37829	18.7436	1.49521e-05	0.000436073
comp2264106_c2_seq1	-1.34056	3.94113	18.7414	1.49695e-05	0.000436335
comp2270479_c0_seq1	-2.5629	2.00332	18.7386	1.49919e-05	0.000436744
comp2274928_c2_seq2	-2.98304	0.823253	18.7299	1.50601e-05	0.000438487
comp2273753_c0_seq4	-1.67234	4.44778	18.722	1.5123e-05	0.000440071
comp2138942_c0_seq1	-1.91447	2.51654	18.7178	1.51557e-05	0.000440777
comp2240418_c0_seq1	-3.54902	-0.413337	18.7136	1.51893e-05	0.000441508
comp2270235_c0_seq2	-2.56539	5.1333	18.7083	1.52319e-05	0.000442498
comp1897429_c0_seq1	1.41594	3.85401	18.7033	1.52714e-05	0.000443351
comp2237264_c0_seq1	-7.98114	-0.403319	18.702	1.52822e-05	0.000443351
comp2269859_c0_seq1	2.03598	4.33609	18.7014	1.52868e-05	0.000443351
comp2263028_c0_seq4	1.70055	4.84723	18.6897	1.53814e-05	0.000445848
comp2218579_c0_seq1	2.62012	-1.22903	18.6885	1.53906e-05	0.000445865
comp2255482_c0_seq1	3.91612	-0.287176	18.6836	1.54301e-05	0.00044676
comp2277105_c0_seq7	1.72137	4.05869	18.671	1.5533e-05	0.000449491
comp2140131_c0_seq1	1.48841	2.34475	18.6666	1.55685e-05	0.000450194
comp2277204_c0_seq2	-1.30767	5.20057	18.6659	1.55746e-05	0.000450194
comp2225054_c0_seq1	2.77186	-1.54954	18.6625	1.56023e-05	0.000450744
comp2274915_c0_seq1	1.57166	2.70321	18.6609	1.56149e-05	0.000450858
comp2274486_c0_seq13	-2.93147	1.14145	18.6445	1.575e-05	0.000454507
comp2270626_c0_seq2	1.6656	2.21847	18.6407	1.57816e-05	0.000455167
comp2256739_c0_seq2	-3.17397	-0.263487	18.6388	1.57973e-05	0.000455365
comp2279215_c0_seq1	-1.8764	2.73342	18.6274	1.58916e-05	0.000457831
comp2271153_c0_seq6	-2.01848	3.87806	18.6261	1.59032e-05	0.000457911
comp2274822_c0_seq2	2.9048	4.00531	18.6215	1.59413e-05	0.000458755
comp2245616_c0_seq2	2.37467	0.335763	18.6186	1.59651e-05	0.000459187
comp2261728_c0_seq2	1.48432	2.07608	18.6042	1.60866e-05	0.000462425
comp2272772_c0_seq2	-2.70098	6.04778	18.5938	1.61749e-05	0.000464297
comp2273199_c1_seq30	1.46072	6.30202	18.5934	1.6178e-05	0.000464297
comp2256558_c1_seq1	-1.61179	4.31063	18.5933	1.61785e-05	0.000464297
comp2273167_c0_seq1	-6.97087	-1.3803	18.5874	1.6229e-05	0.00046549
comp2245360_c2_seq1	3.44408	-1.05786	18.5836	1.62615e-05	0.000466166
comp2226843_c0_seq1	-1.68318	4.40454	18.5731	1.63514e-05	0.000468484
comp2258057_c0_seq1	-2.8232	-0.0951434	18.566	1.64123e-05	0.00046997
comp2267789_c2_seq4	-2.57765	0.161535	18.56	1.6464e-05	0.000471193
comp2261591_c0_seq1	2.48678	1.0491	18.5461	1.65843e-05	0.000474375
comp2262008_c0_seq5	-2.58299	4.98206	18.5365	1.66682e-05	0.000476513
comp2274586_c0_seq4	1.60162	3.83258	18.5331	1.66981e-05	0.000477105
comp2242237_c0_seq1	-7.28811	-1.65028	18.5178	1.68328e-05	0.000480691
comp2264029_c0_seq1	-2.50646	2.60403	18.5142	1.68645e-05	0.000481302
comp2138517_c0_seq1	3.51407	-2.25991	18.5133	1.68727e-05	0.000481302
comp2251957_c0_seq1	2.39707	0.809171	18.5037	1.69578e-05	0.000483427
comp2265878_c0_seq2	-2.07633	2.9003	18.5028	1.69658e-05	0.000483427
comp2271096_c0_seq2	-1.75254	3.02333	18.4993	1.6997e-05	0.000484053
comp2272362_c3_seq1	-2.19539	0.655598	18.4927	1.70556e-05	0.000485455
comp2269918_c0_seq1	-2.45498	0.737233	18.4895	1.70847e-05	0.000486017
comp2247380_c0_seq1	2.74616	1.60651	18.4864	1.71118e-05	0.000486376
comp2278019_c1_seq1	-1.49175	5.68223	18.486	1.7116e-05	0.000486376
comp2196402_c0_seq1	-7.24049	-1.44622	18.4847	1.71275e-05	0.000486439
comp2249798_c1_seq1	2.06547	1.58797	18.479	1.71787e-05	0.000487627
comp2278007_c0_seq1	-1.38269	4.22404	18.4711	1.72501e-05	0.000489271
comp2253589_c1_seq2	1.33593	2.96429	18.4705	1.72554e-05	0.000489271
comp2276317_c0_seq5	-1.67828	3.52569	18.4688	1.72712e-05	0.000489452
comp2254602_c0_seq1	-3.35249	2.923	18.4611	1.73409e-05	0.000491159
comp2267707_c0_seq2	2.01152	4.42012	18.4584	1.73656e-05	0.000491591
comp1879754_c0_seq1	-2.57483	0.947033	18.4504	1.74386e-05	0.000493388
comp2257477_c0_seq1	-1.64582	1.78768	18.4424	1.7512e-05	0.000495198
comp2275555_c1_seq13	-2.04286	3.19332	18.4369	1.75626e-05	0.000496267
comp2259739_c0_seq3	-1.96576	1.53962	18.4362	1.75689e-05	0.000496267
comp2264954_c0_seq1	2.8261	-1.30076	18.4336	1.75925e-05	0.000496366
comp2232491_c0_seq2	-1.3712	4.32756	18.4327	1.76007e-05	0.000496366
comp2279305_c0_seq1	-1.8483	1.97947	18.4327	1.7601e-05	0.000496366
comp2247421_c0_seq10	-1.47944	4.37042	18.4241	1.76811e-05	0.000498355
comp2208457_c0_seq1	-2.15589	1.51754	18.4131	1.77827e-05	0.000500798
comp2261892_c0_seq2	-2.38021	1.78839	18.4127	1.7787e-05	0.000500798
comp1942624_c0_seq1	6.02428	-3.0268	18.4049	1.78594e-05	0.000502565
comp2260302_c0_seq2	-2.22717	3.84578	18.3798	1.80971e-05	0.000508977
comp2263643_c1_seq3	2.29394	-0.500001	18.3765	1.81284e-05	0.000509537
comp2062631_c0_seq1	-3.41	0.259919	18.3756	1.81366e-05	0.000509537
comp2258060_c1_seq1	-1.72569	2.21472	18.3737	1.81546e-05	0.000509767
comp2232773_c0_seq1	-1.69236	1.83753	18.3672	1.82169e-05	0.000511241
comp2269865_c0_seq6	1.41239	5.36333	18.3627	1.826e-05	0.000512176
comp2281439_c0_seq1	4.59171	4.05011	18.3568	1.83163e-05	0.000513477
comp2241506_c0_seq1	-1.75114	2.24832	18.3531	1.8352e-05	0.000514203
comp2253294_c0_seq1	-7.57363	-0.98233	18.3471	1.84095e-05	0.000515534
comp2270718_c0_seq1	2.59948	0.080575	18.3436	1.84433e-05	0.000516204
comp2233616_c0_seq2	-3.44558	-0.271307	18.3343	1.85339e-05	0.000518441
comp2275131_c0_seq6	1.57653	3.74512	18.3334	1.85431e-05	0.000518441
gnl|Pdu_trscr_assembly_1|5073	-1.90519	2.00323	18.3293	1.85823e-05	0.000519257
comp2263874_c0_seq1	1.83758	3.18312	18.3278	1.85974e-05	0.000519399
comp1665789_c0_seq1	-4.06317	1.09754	18.3228	1.86464e-05	0.000520264
comp2243232_c0_seq1	-4.2243	-0.410166	18.3218	1.86557e-05	0.000520264
comp2273503_c0_seq2	-2.21749	0.752724	18.3212	1.86614e-05	0.000520264
comp2266366_c0_seq1	-5.21381	0.0294246	18.3205	1.86683e-05	0.000520264
comp2264198_c0_seq1	-2.29213	0.64203	18.3036	1.88351e-05	0.000524632
comp2105772_c0_seq1	2.05926	2.97505	18.299	1.88802e-05	0.000525606
comp2271259_c0_seq2	-2.2403	0.705329	18.2831	1.90389e-05	0.000529742
comp2271464_c0_seq3	2.53734	3.17631	18.2653	1.92176e-05	0.000534428
comp2272169_c0_seq6	-1.96662	1.94887	18.2581	1.92901e-05	0.000535916
comp2233168_c0_seq1	-3.48262	0.811644	18.2579	1.92928e-05	0.000535916
comp2243143_c0_seq1	1.79179	-0.126971	18.257	1.9302e-05	0.000535916
comp2250278_c0_seq1	-1.95858	4.06868	18.2522	1.93501e-05	0.000536966
comp2255715_c0_seq2	2.60173	0.806796	18.2496	1.93762e-05	0.000537365
comp2250842_c0_seq2	2.511	0.684224	18.2488	1.93852e-05	0.000537365
comp2255011_c0_seq1	-3.1836	-0.0643769	18.2442	1.9432e-05	0.000538337
comp2273470_c0_seq2	1.89151	3.25032	18.2433	1.94409e-05	0.000538337
comp2259164_c0_seq2	-3.04386	0.127569	18.2401	1.94739e-05	0.000538965
comp2271264_c1_seq1	-2.1507	1.69159	18.2373	1.95026e-05	0.000539472
comp2267763_c1_seq7	-1.76113	3.37886	18.2304	1.95732e-05	0.000541137
comp2276444_c0_seq1	-1.79987	3.44365	18.2237	1.96416e-05	0.000542739
comp2247108_c0_seq2	3.12566	-1.47874	18.2197	1.96835e-05	0.00054361
comp1376985_c0_seq1	3.04444	-2.11186	18.2127	1.97561e-05	0.000545325
comp2260195_c0_seq3	3.30605	-2.24534	18.2105	1.97788e-05	0.000545661
comp2265728_c0_seq4	-6.15137	-0.0222344	18.2036	1.98501e-05	0.000547338
comp2269244_c1_seq4	-2.29366	1.86777	18.1864	2.00305e-05	0.000552022
comp1193891_c0_seq1	2.23652	3.45169	18.1801	2.00966e-05	0.000553328
comp2272629_c0_seq1	-1.27189	5.40868	18.1799	2.00992e-05	0.000553328
comp2267042_c1_seq11	-2.27692	4.76606	18.1487	2.04304e-05	0.00056215
comp2255449_c0_seq1	-2.22894	1.26361	18.147	2.04494e-05	0.000562274
comp2231128_c0_seq2	2.69162	-0.989581	18.1463	2.04566e-05	0.000562274
comp2265240_c0_seq3	-2.23596	1.5682	18.1375	2.05519e-05	0.000564598
comp1945561_c0_seq2	-1.96785	7.88121	18.1353	2.05754e-05	0.000564943
comp2254796_c0_seq2	2.57693	-0.00547345	18.1255	2.06808e-05	0.00056754
comp2271320_c1_seq3	-1.77787	8.04856	18.1219	2.07201e-05	0.000568317
comp2252824_c0_seq2	-3.71058	0.888233	18.1182	2.07604e-05	0.000569123
comp2233319_c0_seq1	2.41353	-0.999455	18.1079	2.08732e-05	0.000571916
comp2231865_c0_seq1	2.42765	0.560589	18.1015	2.09434e-05	0.000573536
comp2268385_c1_seq6	-3.11441	0.335507	18.0977	2.09857e-05	0.000574392
comp2209542_c0_seq2	1.98732	3.21357	18.0773	2.12112e-05	0.000579872
comp2042029_c0_seq1	1.86173	4.91117	18.0769	2.12157e-05	0.000579872
comp2264877_c0_seq1	-1.86619	2.35205	18.0766	2.12193e-05	0.000579872
comp2245323_c1_seq1	2.01077	2.57154	18.0694	2.12999e-05	0.00058177
comp2235961_c0_seq1	-2.92129	0.374766	18.0658	2.13396e-05	0.000582548
comp2138099_c0_seq1	-2.41604	3.66855	18.0584	2.14231e-05	0.00058452
comp2261360_c1_seq1	-2.4995	2.286	18.0458	2.15659e-05	0.000588108
comp2265724_c0_seq2	1.99542	0.27144	18.044	2.15853e-05	0.000588329
comp2273039_c1_seq1	1.56502	4.57586	18.043	2.15971e-05	0.000588343
comp2263857_c0_seq4	-2.05414	0.777911	18.0273	2.17763e-05	0.000592913
comp2276069_c0_seq6	-1.89623	4.38457	18.0216	2.18411e-05	0.000594367
comp2269714_c0_seq2	-2.3075	1.66919	18.0134	2.19358e-05	0.000596632
comp2235947_c0_seq2	-3.82342	-0.257035	17.9966	2.21299e-05	0.000601598
comp2274193_c0_seq5	1.34323	5.46404	17.9876	2.22353e-05	0.000604147
comp2232510_c0_seq1	1.76165	3.60146	17.9754	2.23783e-05	0.000607716
comp2241022_c0_seq1	-1.6664	3.33176	17.9696	2.24459e-05	0.000609234
comp2242395_c0_seq1	-2.25167	1.11395	17.9611	2.2547e-05	0.000611462
comp2268374_c0_seq2	-2.98246	0.94398	17.9607	2.25515e-05	0.000611462
comp2254617_c0_seq2	1.61612	2.63779	17.9554	2.26146e-05	0.000612854
comp2275414_c0_seq1	-1.33543	3.80947	17.9534	2.26384e-05	0.000613179
comp2198075_c0_seq1	2.17248	0.425824	17.9505	2.26721e-05	0.000613775
comp2265239_c0_seq1	-2.75795	-0.155671	17.9419	2.27754e-05	0.00061625
comp2264825_c0_seq1	-5.08749	-1.34077	17.9376	2.28268e-05	0.000617318
comp2272091_c1_seq2	-2.52358	1.3408	17.9349	2.28595e-05	0.000617884
comp2275714_c2_seq1	2.27313	7.85491	17.924	2.29901e-05	0.000620818
comp2237345_c0_seq1	-2.0466	1.55785	17.9239	2.29919e-05	0.000620818
comp2268453_c0_seq1	1.62758	4.71326	17.9042	2.3231e-05	0.000626948
comp2261145_c0_seq7	-1.64597	1.35908	17.8904	2.33998e-05	0.000631176
comp2264943_c0_seq1	-2.65223	0.995503	17.8892	2.34144e-05	0.000631242
comp2277218_c1_seq5	-1.71998	4.54422	17.8752	2.35879e-05	0.000635082
comp2130027_c0_seq1	-2.06106	1.73228	17.8747	2.35932e-05	0.000635082
comp2263902_c0_seq1	1.2945	3.91131	17.8747	2.35934e-05	0.000635082
comp2275771_c2_seq11	-2.71334	0.597658	17.8705	2.36462e-05	0.000636174
comp2262596_c0_seq1	-1.76272	2.85111	17.8653	2.371e-05	0.000637561
comp2274436_c0_seq1	-1.4887	2.84278	17.8613	2.37603e-05	0.000638584
comp2242590_c0_seq1	-2.80275	0.13503	17.8523	2.38728e-05	0.000640965
comp2245060_c0_seq2	-2.41867	4.64097	17.8523	2.38735e-05	0.000640965
comp2275086_c0_seq1	-1.45012	3.23916	17.8449	2.39664e-05	0.000643128
comp2249511_c0_seq1	2.11175	-0.662626	17.8386	2.40453e-05	0.000644688
comp2274246_c0_seq1	-1.74248	5.87426	17.8383	2.40493e-05	0.000644688
comp2276040_c1_seq5	1.48081	6.8929	17.8191	2.42933e-05	0.000650894
comp2274464_c1_seq2	-2.24907	1.9131	17.8067	2.44517e-05	0.000654799
comp2063065_c0_seq1	-3.29719	0.736527	17.8047	2.44778e-05	0.000655161
comp2257627_c0_seq2	1.59525	2.81125	17.8009	2.45264e-05	0.000656084
comp2273149_c0_seq6	1.5316	5.72319	17.8001	2.45375e-05	0.000656084
comp2207142_c0_seq1	-2.19269	1.0144	17.7893	2.46769e-05	0.000659472
comp2269252_c3_seq1	-2.34256	1.06836	17.7856	2.47243e-05	0.000660401
comp2267270_c0_seq1	1.95143	0.739274	17.7774	2.48312e-05	0.000662643
comp2271715_c0_seq2	-1.88309	5.60322	17.7771	2.48358e-05	0.000662643
comp2214511_c0_seq1	-2.2088	0.706253	17.7763	2.48464e-05	0.000662643
comp2267007_c0_seq1	1.6107	5.28284	17.7662	2.49777e-05	0.000665804
comp2272206_c0_seq2	-2.81197	1.02506	17.7636	2.50127e-05	0.000666394
comp2271066_c0_seq4	-1.65373	1.93051	17.7597	2.50638e-05	0.000667414
comp2262824_c0_seq1	-2.66776	0.550798	17.757	2.50996e-05	0.000668026
comp2271384_c0_seq4	1.29456	3.5522	17.7518	2.51675e-05	0.000669492
comp2088138_c0_seq1	2.87517	-0.753435	17.7446	2.52635e-05	0.000671701
comp2275664_c0_seq4	1.41487	4.56194	17.741	2.53107e-05	0.000672613
comp2276564_c0_seq1	-2.40388	2.14749	17.7389	2.53395e-05	0.000672881
comp2274294_c0_seq10	1.30516	4.36842	17.738	2.53518e-05	0.000672881
comp2271413_c0_seq1	-1.44416	4.1643	17.7374	2.53596e-05	0.000672881
comp2279244_c0_seq1	-1.28814	5.83816	17.736	2.53782e-05	0.000673034
comp2279213_c0_seq1	-1.59215	7.76328	17.7348	2.53933e-05	0.000673089
comp2248842_c0_seq4	-2.22616	0.393205	17.7198	2.55951e-05	0.000678095
comp2267492_c2_seq1	-2.66362	1.4116	17.7134	2.56809e-05	0.000679964
comp2249778_c0_seq2	2.13598	0.567543	17.7126	2.56918e-05	0.000679964
comp2270440_c0_seq6	-1.7646	1.91652	17.7051	2.57936e-05	0.000682312
comp2270283_c0_seq4	-1.48471	4.32849	17.69	2.59991e-05	0.000687399
comp2140539_c0_seq1	-1.91252	2.03012	17.6807	2.61259e-05	0.000690052
comp2270846_c0_seq9	-1.67517	1.92973	17.6807	2.6126e-05	0.000690052
comp2266348_c0_seq1	2.27288	0.975773	17.6753	2.62005e-05	0.000691669
comp2274272_c0_seq1	2.12836	2.60893	17.6727	2.62359e-05	0.000692252
comp2238786_c0_seq4	-1.35264	4.38584	17.6664	2.63233e-05	0.000694207
comp2273277_c0_seq1	1.56529	4.72946	17.6612	2.63955e-05	0.00069576
comp2276102_c0_seq8	1.90479	1.8584	17.6575	2.64466e-05	0.000696404
comp2271361_c0_seq4	1.76587	2.48607	17.6572	2.64509e-05	0.000696404
comp2276983_c0_seq4	-1.48001	3.88484	17.6566	2.64601e-05	0.000696404
comp2254938_c0_seq2	-3.98234	-1.00579	17.6531	2.65079e-05	0.000697308
comp2265404_c0_seq3	2.54068	2.57378	17.6491	2.65641e-05	0.000698434
comp2274196_c1_seq2	-1.67016	2.22601	17.6295	2.68399e-05	0.000705329
comp2250049_c0_seq1	-7.584	-1.76756	17.5996	2.7265e-05	0.000716141
comp2264049_c0_seq1	-1.99125	1.80007	17.5936	2.73509e-05	0.000718034
comp2278432_c0_seq4	1.52546	4.86985	17.5868	2.74482e-05	0.000720225
comp2277891_c0_seq4	-1.95487	3.04634	17.5762	2.76023e-05	0.000723904
comp2275263_c0_seq3	1.98472	2.00461	17.5695	2.76993e-05	0.000726082
comp2197643_c0_seq1	-1.81634	4.98575	17.5682	2.7719e-05	0.000726231
comp2228128_c0_seq1	-2.16265	0.4931	17.5641	2.77783e-05	0.000727421
comp2255514_c0_seq3	2.55002	0.116036	17.5586	2.78584e-05	0.000729151
comp2238128_c0_seq1	3.49299	0.520965	17.5569	2.78834e-05	0.000729438
comp2262938_c0_seq1	1.55241	7.97531	17.5521	2.79538e-05	0.000730913
comp2278382_c0_seq1	-1.611	3.32417	17.5486	2.80061e-05	0.000731793
comp2276905_c0_seq1	-3.014	2.11927	17.5479	2.80156e-05	0.000731793
comp2271189_c0_seq4	2.08462	1.35615	17.5436	2.80798e-05	0.000733102
comp2257618_c0_seq4	-3.03104	0.557203	17.5425	2.80957e-05	0.000733151
comp2138151_c1_seq1	2.08979	0.985161	17.5168	2.84776e-05	0.000742743
comp2278009_c0_seq2	-2.16567	3.4514	17.5013	2.87115e-05	0.000748468
comp2133746_c1_seq1	3.36122	-1.28522	17.4994	2.87395e-05	0.000748824
comp2251943_c0_seq1	-3.86672	1.37513	17.4904	2.8877e-05	0.000752029
[truncated: 6,326 more rows]

## Sheet: IM_NM vs M_NM_Male
	logFC	logCPM	LR	PValue	FDR
comp2269662_c0_seq8	10.1158	8.84258	308.888	3.81383e-69	1.98544e-64
comp2257567_c0_seq1	7.92582	5.93736	276.846	3.65525e-62	9.51442e-58
comp2265326_c0_seq3	-9.86775	7.37152	227.483	2.1101e-51	3.66166e-47
comp2251363_c0_seq1	8.86482	2.35088	216.674	4.80692e-49	6.25609e-45
comp2265751_c0_seq4	8.5141	3.4265	186.921	1.49407e-42	1.39887e-38
comp2223254_c0_seq1	11.6113	5.43078	186.77	1.61225e-42	1.39887e-38
comp2240916_c0_seq1	-6.35876	4.92009	178.992	8.04417e-41	5.98245e-37
comp2265263_c0_seq1	7.44756	6.34179	177.205	1.97531e-40	1.28541e-36
isotig10568	-8.60757	6.51839	166.86	3.58969e-38	2.07639e-34
comp2250225_c0_seq2	6.4343	6.8322	158.431	2.49154e-36	1.29707e-32
comp2254966_c0_seq1	7.75278	1.78574	155.772	9.49296e-36	4.49267e-32
comp2254792_c1_seq4	11.6196	8.05803	151.328	8.88526e-35	3.85465e-31
comp2272108_c0_seq1	5.31536	6.16472	145.99	1.30462e-33	5.22441e-30
comp2233645_c0_seq1	10.7733	0.557173	145.409	1.74771e-33	6.49884e-30
comp2215885_c0_seq1	9.93345	2.79247	138.27	6.36279e-32	2.20827e-28
comp2261876_c0_seq1	-4.6276	5.12508	136.984	1.2157e-31	3.95552e-28
comp2275713_c0_seq3	6.11828	9.28827	133.868	5.83768e-31	1.78767e-27
comp2256337_c0_seq2	6.08111	2.97697	133.34	7.61641e-31	2.20279e-27
comp2262137_c0_seq3	-7.4337	4.38057	132.056	1.45467e-30	3.98573e-27
comp2272343_c0_seq3	-5.8232	4.68973	126.682	2.1805e-29	5.67573e-26
comp2224089_c0_seq1	5.0454	3.91417	122.97	1.41552e-28	3.50908e-25
comp2236959_c0_seq1	5.93503	4.69004	116.239	4.21316e-27	9.96968e-24
comp2234324_c0_seq2	10.4739	6.62715	115.055	7.65365e-27	1.73235e-23
comp2257772_c0_seq1	9.799	1.449	113.89	1.37724e-26	2.98741e-23
comp2261608_c0_seq1	8.08648	6.38239	111.666	4.2289e-26	8.8061e-23
comp2262279_c0_seq1	10.4067	8.15195	111.119	5.57218e-26	1.1157e-22
comp2271537_c0_seq19	3.82293	4.91343	107.556	3.36196e-25	6.48223e-22
comp2268687_c0_seq1	7.56344	6.58489	106.953	4.55963e-25	8.47749e-22
comp2234463_c0_seq2	9.94062	2.5932	105.974	7.47062e-25	1.34108e-21
comp2261851_c1_seq1	-4.29088	5.29074	104.579	1.51059e-24	2.62133e-21
comp2247098_c0_seq1	-6.578	4.37969	104.021	2.00229e-24	3.27719e-21
comp2258675_c0_seq3	4.44184	3.60954	104.009	2.01445e-24	3.27719e-21
comp2242933_c0_seq1	5.70445	9.31557	102.735	3.83105e-24	6.04366e-21
comp2262443_c0_seq1	4.48543	6.78077	101.858	5.96358e-24	9.13112e-21
comp2271249_c0_seq23	6.25848	5.47995	100.29	1.31626e-23	1.9578e-20
comp2268735_c0_seq1	-6.12676	2.15818	99.9842	1.5362e-23	2.22147e-20
comp2272119_c0_seq6	4.48708	2.9051	99.4371	2.02491e-23	2.84905e-20
comp2205302_c0_seq1	4.15219	3.5896	97.1381	6.46569e-23	8.85783e-20
comp2267304_c0_seq3	4.49747	4.92572	95.1706	1.74663e-22	2.33149e-19
comp2269234_c0_seq4	-4.4209	2.49733	94.5795	2.35439e-22	3.06418e-19
comp2252195_c0_seq1	6.49334	3.89653	94.4371	2.53006e-22	3.2125e-19
comp2271713_c0_seq1	-5.4624	6.10047	93.8741	3.36242e-22	4.16772e-19
comp2263873_c0_seq9	-5.03532	5.50438	93.7335	3.61001e-22	4.37055e-19
comp2245447_c0_seq1	8.75835	1.13806	93.3922	4.28936e-22	5.07499e-19
comp2255923_c0_seq3	5.6333	3.62154	92.2532	7.62662e-22	8.82299e-19
comp2235052_c0_seq1	8.38416	3.52042	92.0169	8.59414e-22	9.72614e-19
comp2261980_c0_seq3	-5.56667	7.50963	90.1891	2.16454e-21	2.39753e-18
comp2244589_c0_seq2	5.58221	7.25102	89.8539	2.56415e-21	2.78098e-18
comp2272379_c0_seq9	4.38857	6.18735	88.0583	6.35532e-21	6.75207e-18
comp2265234_c1_seq1	8.65599	4.6295	87.9961	6.55851e-21	6.82859e-18
comp2281046_c0_seq1	-5.50242	2.94016	87.6638	7.75828e-21	7.91937e-18
comp2232214_c0_seq1	9.83567	0.225278	86.3664	1.49504e-20	1.49673e-17
comp2277776_c0_seq1	4.30366	5.34895	86.2353	1.59753e-20	1.56916e-17
comp2243368_c0_seq4	-4.47621	3.65696	85.5996	2.20322e-20	2.12403e-17
comp2272249_c0_seq2	3.85177	3.10433	84.2605	4.33689e-20	4.10498e-17
comp2264786_c0_seq1	3.86451	3.10823	83.9018	5.19965e-20	4.83372e-17
comp2275741_c0_seq1	3.0997	6.81171	83.416	6.64802e-20	6.07174e-17
gnl|Pdu_trscr_assembly_1|1218	3.07212	3.2937	83.038	8.04929e-20	7.15304e-17
comp2272756_c0_seq1	5.93389	3.28702	83.0239	8.10675e-20	7.15304e-17
comp2270561_c0_seq2	4.39498	3.80083	82.5651	1.02249e-19	8.8716e-17
comp2261501_c0_seq1	-4.47913	3.84797	82.0642	1.31738e-19	1.12429e-16
comp2270387_c0_seq54	2.80726	5.01921	81.9259	1.41287e-19	1.18633e-16
comp2277584_c0_seq5	4.07486	4.4016	81.8459	1.47119e-19	1.21569e-16
gnl|Pdu_trscr_assembly_1|88882	5.05308	2.53671	81.7946	1.50992e-19	1.2282e-16
comp2277815_c1_seq2	4.34102	4.3965	81.6064	1.66078e-19	1.33013e-16
comp2259403_c0_seq2	-4.88473	3.83382	81.3211	1.91869e-19	1.51341e-16
comp2273207_c0_seq5	3.81497	4.49653	80.0239	3.69913e-19	2.87423e-16
comp2042029_c0_seq1	4.2797	4.91117	79.2011	5.60986e-19	4.29476e-16
gnl|Pdu_trscr_assembly_1|1213	4.44001	9.46197	79.1122	5.86803e-19	4.4273e-16
comp2272698_c0_seq4	2.97632	6.84671	78.8266	6.78064e-19	5.04276e-16
comp2269108_c0_seq5	3.81188	0.981596	78.4095	8.37502e-19	6.14078e-16
comp2278420_c1_seq3	5.89476	5.61753	77.6199	1.24907e-18	9.03133e-16
comp2277610_c1_seq3	3.24211	5.49405	77.4513	1.36038e-18	9.69331e-16
comp2276390_c2_seq3	3.02927	6.09093	77.426	1.37787e-18	9.69331e-16
comp2273791_c0_seq4	4.33721	4.39159	76.996	1.71302e-18	1.18904e-15
comp2280824_c0_seq1	3.41974	5.28267	76.6919	1.99821e-18	1.36875e-15
comp2275270_c0_seq2	4.16923	7.8946	76.5298	2.1692e-18	1.46658e-15
comp2257715_c1_seq3	3.36468	5.86428	76.447	2.26204e-18	1.50974e-15
comp2273978_c0_seq1	3.7989	5.35201	76.0394	2.78066e-18	1.83239e-15
comp2275310_c0_seq1	3.7072	4.87924	75.8439	3.07007e-18	1.99781e-15
comp2252381_c0_seq5	-4.95146	2.29829	75.7635	3.19757e-18	2.05509e-15
comp2200316_c0_seq1	3.7668	4.73646	75.4815	3.68855e-18	2.34173e-15
gnl|Pdu_trscr_assembly_1|20388	-4.34722	5.87661	75.1869	4.28198e-18	2.68573e-15
comp2273601_c1_seq1	3.94416	2.592	75.0713	4.54019e-18	2.81378e-15
comp2268528_c0_seq2	-3.34554	3.82423	75.0224	4.65402e-18	2.85039e-15
comp2248585_c0_seq2	-3.96464	2.08953	74.524	5.99053e-18	3.62629e-15
comp2256943_c0_seq2	5.22324	0.184548	74.0187	7.73794e-18	4.63022e-15
comp2267782_c1_seq1	4.50134	1.02027	73.9344	8.07556e-18	4.72971e-15
comp2256041_c0_seq1	3.23424	9.69881	73.9319	8.08591e-18	4.72971e-15
comp2272370_c0_seq4	3.22143	3.67032	73.8008	8.64118e-18	4.99835e-15
comp2269191_c0_seq3	5.33486	3.33105	73.4281	1.04372e-17	5.97089e-15
comp2255868_c0_seq1	4.0921	1.01509	72.2398	1.90574e-17	1.07838e-14
comp1933325_c0_seq2	-3.20768	5.67241	72.129	2.01576e-17	1.12837e-14
comp2261841_c0_seq9	-4.03481	1.61298	71.8923	2.27272e-17	1.25868e-14
comp2116603_c0_seq1	8.1282	-0.349586	71.843	2.33023e-17	1.27694e-14
comp2254530_c0_seq1	-4.8143	4.91265	71.5595	2.69016e-17	1.45882e-14
comp2254367_c0_seq1	-2.97591	3.99972	71.4762	2.8063e-17	1.50611e-14
comp2221300_c0_seq1	4.1339	1.67788	71.2283	3.18195e-17	1.6903e-14
comp2277992_c0_seq1	4.09762	4.6553	71.1652	3.28525e-17	1.72755e-14
comp2202652_c0_seq2	4.39211	3.18167	71.1315	3.34186e-17	1.73974e-14
comp2273459_c1_seq1	4.41182	1.94567	70.529	4.5356e-17	2.33781e-14
comp2261071_c0_seq1	5.21843	2.58998	70.3428	4.98447e-17	2.54399e-14
comp2278392_c0_seq1	3.60537	5.51108	70.0985	5.64163e-17	2.85143e-14
comp2261795_c0_seq1	-3.60132	2.43575	70.0115	5.89601e-17	2.95135e-14
comp2261193_c1_seq4	4.95371	0.816035	69.7988	6.56719e-17	3.25601e-14
comp2267592_c0_seq1	3.49665	2.68892	69.6274	7.16348e-17	3.51815e-14
comp2267655_c0_seq21	3.94091	7.54362	69.4124	7.98833e-17	3.88659e-14
comp2272093_c0_seq1	-2.96525	5.13846	69.2562	8.64685e-17	4.16802e-14
comp1267867_c0_seq1	-5.17232	2.1808	68.8667	1.05347e-16	5.03143e-14
comp2273459_c0_seq2	4.6985	3.84461	68.7384	1.12432e-16	5.32102e-14
comp2236891_c0_seq1	-3.45278	2.80554	68.369	1.35595e-16	6.35939e-14
comp2231489_c0_seq1	6.48257	-0.618587	68.0755	1.57354e-16	7.314e-14
comp2264540_c1_seq15	3.31635	2.8628	67.8205	1.79078e-16	8.25011e-14
comp2251620_c0_seq1	-3.22402	7.38473	67.7467	1.85912e-16	8.48983e-14
comp2269247_c0_seq1	3.11069	6.76327	67.419	2.19521e-16	9.88802e-14
comp2275616_c0_seq2	-3.43161	4.42988	67.4118	2.20329e-16	9.88802e-14
comp2241380_c0_seq2	4.96232	-0.121976	67.329	2.2978e-16	1.0224e-13
comp2280841_c0_seq1	5.49295	3.23873	67.0912	2.59236e-16	1.14369e-13
comp2276143_c1_seq1	-4.39754	2.14456	66.7487	3.08424e-16	1.34926e-13
comp1192611_c0_seq1	3.82059	3.30986	66.7138	3.13937e-16	1.36194e-13
comp2232271_c0_seq1	4.64516	2.06971	66.5762	3.36621e-16	1.44828e-13
comp2257310_c0_seq1	-4.95157	1.28203	66.5	3.49902e-16	1.49308e-13
comp2268869_c0_seq6	-5.01294	3.81103	66.4431	3.6015e-16	1.52431e-13
comp2250762_c0_seq1	-5.56218	3.14948	66.2602	3.95161e-16	1.65901e-13
comp2256699_c0_seq2	-4.45287	1.15441	66.2408	3.99062e-16	1.66198e-13
comp2238682_c0_seq2	6.23662	2.43675	65.8298	4.91582e-16	2.03105e-13
comp2252936_c1_seq1	3.33423	4.28104	65.8006	4.98926e-16	2.04516e-13
comp2270000_c0_seq4	5.10775	4.54323	65.7633	5.08465e-16	2.06798e-13
comp2219247_c0_seq1	5.17825	0.988112	65.7248	5.18492e-16	2.09242e-13
comp1194202_c0_seq1	-3.45495	3.36752	65.303	6.42236e-16	2.57186e-13
comp2268979_c0_seq1	3.04114	4.57511	64.9649	7.62451e-16	3.02996e-13
comp2138076_c0_seq1	4.1816	3.82475	64.8953	7.89872e-16	3.11515e-13
comp2270372_c0_seq1	3.04894	5.13068	64.3067	1.06483e-15	4.16795e-13
comp2251791_c0_seq2	-4.90384	3.61929	64.2455	1.09845e-15	4.23896e-13
comp2253407_c0_seq3	-4.67344	8.57328	64.244	1.09925e-15	4.23896e-13
comp1194608_c0_seq1	3.1664	4.67432	63.9906	1.25016e-15	4.78543e-13
comp2209056_c0_seq1	7.38353	3.1676	63.947	1.2781e-15	4.85669e-13
comp2266942_c0_seq1	5.90035	0.0764987	63.53	1.57946e-15	5.95835e-13
comp2275017_c0_seq4	4.46295	3.17281	63.4709	1.62752e-15	6.07946e-13
comp2257274_c0_seq1	-4.17673	1.84958	63.4525	1.64282e-15	6.07946e-13
comp2282195_c0_seq2	3.31592	6.79314	63.448	1.6466e-15	6.07946e-13
comp2273366_c2_seq1	3.56065	2.43808	63.2452	1.82508e-15	6.66104e-13
comp2267731_c0_seq5	-4.3204	2.0282	63.2403	1.82971e-15	6.66104e-13
comp2267039_c0_seq7	-4.1181	2.54392	63.163	1.90291e-15	6.87942e-13
comp2269751_c0_seq2	3.50362	2.77427	62.9955	2.07179e-15	7.43831e-13
comp2266373_c0_seq1	3.42503	1.77581	62.9457	2.1248e-15	7.57638e-13
comp2247744_c0_seq2	-3.34957	2.77222	62.8716	2.20635e-15	7.81362e-13
comp2246299_c0_seq1	4.79935	1.34582	62.7183	2.38489e-15	8.38884e-13
comp2273726_c1_seq7	-2.68914	4.54853	62.6973	2.41041e-15	8.42173e-13
comp2261491_c0_seq1	-4.69927	6.62163	62.5696	2.57189e-15	8.87425e-13
comp2239858_c0_seq1	3.97755	4.73312	62.5606	2.58373e-15	8.87425e-13
comp2266185_c0_seq3	5.45259	2.2424	62.5549	2.59113e-15	8.87425e-13
comp2260095_c1_seq1	4.69461	1.0617	62.5421	2.60812e-15	8.87425e-13
comp2277987_c1_seq1	3.3426	6.31038	62.487	2.6821e-15	9.06671e-13
comp2254383_c0_seq1	-4.07698	6.97749	62.2293	3.05709e-15	1.02677e-12
comp2274900_c0_seq10	3.24922	3.56881	61.9684	3.49013e-15	1.1647e-12
comp2277114_c0_seq12	2.98641	5.20736	61.6726	4.05586e-15	1.34487e-12
comp2257694_c0_seq1	-4.18253	1.12729	61.5604	4.29372e-15	1.41473e-12
comp2253831_c0_seq1	-3.44083	3.05881	61.0566	5.54559e-15	1.81571e-12
comp2276244_c0_seq1	-2.6506	5.81839	61.0299	5.62148e-15	1.82905e-12
comp2264517_c0_seq6	3.22757	2.34486	60.8298	6.22284e-15	2.01214e-12
comp2259786_c0_seq4	-3.39926	3.34216	60.7738	6.40251e-15	2.05746e-12
comp2265937_c0_seq5	-2.74499	5.57126	60.6961	6.66029e-15	2.12717e-12
comp2257653_c0_seq2	-4.56814	1.73993	60.6695	6.75084e-15	2.14294e-12
comp2274541_c0_seq1	-4.42536	9.55111	60.1426	8.82262e-15	2.78362e-12
comp2278099_c2_seq1	-3.40061	3.14918	60.0681	9.16319e-15	2.87365e-12
comp2253691_c1_seq1	2.95968	6.51485	60.0472	9.26111e-15	2.88697e-12
comp2269146_c0_seq1	2.7556	9.51253	59.9353	9.80263e-15	3.03759e-12
comp2260377_c0_seq3	2.64169	3.30109	59.4808	1.23491e-14	3.80403e-12
comp2277510_c0_seq2	-2.99909	4.14415	59.013	1.56636e-14	4.79665e-12
comp2267927_c0_seq4	-4.6884	1.7892	58.9087	1.65163e-14	5.02821e-12
comp2254640_c0_seq1	-4.67286	6.67509	58.7169	1.8207e-14	5.51067e-12
comp1194044_c0_seq1	-3.30326	2.03042	58.5734	1.95845e-14	5.89334e-12
comp2254406_c0_seq1	-3.83657	2.18623	58.4999	2.033e-14	6.04888e-12
comp2274137_c0_seq1	-3.39969	7.12682	58.4996	2.03337e-14	6.04888e-12
comp1927618_c0_seq1	3.3653	2.93187	58.4185	2.11888e-14	6.26742e-12
comp2270003_c1_seq1	4.19922	1.5458	58.3671	2.17494e-14	6.39689e-12
comp2273540_c0_seq2	-2.63647	4.48179	57.7596	2.96193e-14	8.66264e-12
comp2252709_c0_seq3	2.61402	3.43174	57.653	3.12694e-14	9.09414e-12
comp2261606_c0_seq1	3.06484	2.62732	57.5364	3.31783e-14	9.59573e-12
comp2274563_c1_seq9	2.53269	4.25241	57.3436	3.65946e-14	1.05253e-11
comp2270003_c0_seq1	4.80065	2.66843	57.316	3.71119e-14	1.05925e-11
comp2274959_c0_seq5	2.83922	6.79966	57.3095	3.7235e-14	1.05925e-11
comp2234282_c0_seq1	3.40841	5.73055	57.2941	3.75278e-14	1.06177e-11
comp2259241_c0_seq1	3.68837	1.1569	57.1725	3.99223e-14	1.12341e-11
comp2276073_c1_seq1	4.2	3.72847	56.2065	6.52451e-14	1.82613e-11
comp2276174_c0_seq14	2.85534	4.12421	56.113	6.8424e-14	1.90486e-11
comp2270520_c0_seq5	3.51531	5.51375	56.0055	7.2269e-14	2.0012e-11
comp2265611_c0_seq1	-4.85719	2.31777	55.9269	7.52153e-14	2.07176e-11
comp2260003_c0_seq1	4.30485	1.70551	55.8628	7.7708e-14	2.12916e-11
comp2260546_c0_seq1	3.34772	2.87622	55.7919	8.05629e-14	2.19582e-11
comp2229575_c0_seq1	-2.07376	5.2021	55.6815	8.5218e-14	2.31061e-11
comp2266776_c0_seq2	3.31473	3.31823	55.5834	8.95772e-14	2.40968e-11
comp2266106_c0_seq2	3.00747	4.02021	55.5786	8.97976e-14	2.40968e-11
comp2268819_c2_seq1	4.65789	4.60513	55.2966	1.03649e-13	2.76711e-11
comp1946763_c1_seq1	5.61548	-1.4052	55.2085	1.084e-13	2.87919e-11
comp2241134_c0_seq1	-2.60811	4.785	55.1763	1.10189e-13	2.91185e-11
comp2251993_c0_seq1	-3.8973	2.91272	55.0225	1.19155e-13	3.13288e-11
comp2224365_c0_seq1	6.20359	-1.31226	54.816	1.32359e-13	3.46256e-11
comp2272553_c0_seq5	-2.69939	4.59328	54.7278	1.38433e-13	3.60335e-11
comp2263124_c0_seq2	3.75142	5.65084	54.7169	1.39204e-13	3.60538e-11
comp2270999_c0_seq5	2.89311	3.72666	54.6868	1.41349e-13	3.62605e-11
comp2266841_c0_seq1	-4.12417	3.6694	54.6838	1.41572e-13	3.62605e-11
comp2252998_c0_seq2	4.41734	3.75172	54.6766	1.42091e-13	3.62605e-11
gnl|Pdu_trscr_assembly_1|7284	4.55528	2.90123	54.4139	1.62408e-13	4.10613e-11
comp2276664_c0_seq46	3.21455	8.21489	54.413	1.62482e-13	4.10613e-11
comp2266416_c0_seq4	-3.60944	1.62058	54.3471	1.68023e-13	4.22567e-11
comp2258266_c0_seq1	3.32626	2.23111	54.3327	1.6926e-13	4.2363e-11
comp2248955_c0_seq1	7.43903	0.503731	54.2978	1.72299e-13	4.28738e-11
comp2275743_c0_seq2	2.6243	6.43651	54.2904	1.72948e-13	4.28738e-11
comp1193006_c0_seq1	5.17353	0.373835	54.2683	1.74904e-13	4.31531e-11
comp2238985_c0_seq1	-3.89948	2.68635	54.2062	1.8052e-13	4.416e-11
comp2242307_c0_seq1	4.71637	-0.326251	54.2044	1.80681e-13	4.416e-11
comp2272437_c1_seq1	-3.70461	8.89848	54.0887	1.91638e-13	4.66192e-11
comp2267703_c0_seq2	-4.1208	1.05035	53.7643	2.26047e-13	5.47339e-11
comp2262137_c0_seq4	-3.23917	7.20717	53.5342	2.54132e-13	6.12494e-11
comp2245203_c0_seq1	4.37614	1.61442	53.4078	2.71018e-13	6.5018e-11
comp2275593_c0_seq1	3.84208	4.67431	53.2619	2.91912e-13	6.97093e-11
comp2273076_c1_seq5	2.27087	5.36977	53.2206	2.98119e-13	7.08665e-11
comp2258211_c0_seq1	5.39467	-0.839293	52.8873	3.53251e-13	8.35905e-11
comp2277282_c0_seq11	3.85007	9.32057	52.4537	4.40509e-13	1.03767e-10
comp2254414_c0_seq1	2.42843	3.41034	52.3459	4.65357e-13	1.09126e-10
comp2254279_c0_seq1	5.31009	2.91813	52.3291	4.69358e-13	1.09571e-10
comp2273939_c0_seq1	3.46191	2.47215	52.1382	5.17281e-13	1.20219e-10
comp2267875_c0_seq5	2.25521	5.30212	52.1076	5.25425e-13	1.21569e-10
comp2141958_c0_seq2	8.61432	1.53096	51.8714	5.92564e-13	1.36497e-10
comp2266909_c1_seq3	3.28732	2.83067	51.8381	6.02707e-13	1.38222e-10
comp2263706_c0_seq2	4.40334	0.552448	51.7472	6.3128e-13	1.44139e-10
comp2257429_c0_seq1	-3.2789	2.18493	51.5094	7.12554e-13	1.61986e-10
comp2263195_c0_seq3	7.41745	2.48856	51.3659	7.66593e-13	1.73513e-10
comp2239531_c0_seq1	3.08988	3.75081	51.3122	7.87843e-13	1.77551e-10
comp2246453_c0_seq1	-4.21193	4.18295	51.2281	8.22338e-13	1.84526e-10
comp2236994_c0_seq1	5.9423	0.485819	51.1214	8.68252e-13	1.93993e-10
comp2271221_c0_seq2	3.01199	2.07305	51.001	9.23172e-13	2.05382e-10
comp2271848_c0_seq8	-2.947	4.85653	50.8317	1.00636e-12	2.22937e-10
comp2266655_c1_seq2	-3.525	1.5346	50.7227	1.06383e-12	2.34668e-10
comp2266655_c0_seq4	-3.76629	2.66271	50.6778	1.08843e-12	2.39083e-10
comp2278332_c0_seq1	-2.79769	4.40038	50.4678	1.21134e-12	2.64963e-10
comp2269014_c0_seq1	-3.54689	1.16581	50.2168	1.37661e-12	2.99853e-10
comp2270752_c0_seq7	4.13499	3.51447	50.1608	1.41646e-12	3.07248e-10
comp2266966_c1_seq7	4.6101	7.48941	49.8818	1.63292e-12	3.52143e-10
comp2274439_c0_seq36	3.52045	5.48722	49.877	1.63696e-12	3.52143e-10
comp2263229_c0_seq2	-3.70808	3.50656	49.7626	1.73519e-12	3.71738e-10
comp2255435_c0_seq1	5.72685	5.33998	49.696	1.79515e-12	3.83008e-10
comp2269927_c0_seq1	-3.58053	1.53468	49.67	1.81905e-12	3.86522e-10
comp2254647_c0_seq2	2.46439	5.32351	49.6494	1.83824e-12	3.89012e-10
comp2272814_c1_seq2	2.89547	6.05663	49.6086	1.87692e-12	3.9559e-10
comp2264911_c0_seq3	5.44004	3.20333	49.5582	1.92574e-12	4.04242e-10
comp2270871_c0_seq1	-3.69446	4.2809	49.4674	2.01697e-12	4.21693e-10
comp2271592_c0_seq12	-3.80852	2.16685	49.3986	2.08893e-12	4.34991e-10
comp2275659_c1_seq6	2.54181	6.51911	49.3441	2.14777e-12	4.45462e-10
comp2277335_c1_seq5	2.46177	4.139	49.23	2.27645e-12	4.70276e-10
comp2273249_c0_seq4	-4.08663	7.62828	49.0593	2.48343e-12	5.11008e-10
comp2221142_c0_seq1	-3.92777	6.34025	48.906	2.68524e-12	5.50358e-10
comp2236155_c0_seq1	4.09615	3.28227	48.8655	2.74132e-12	5.59648e-10
comp2268100_c0_seq1	7.28583	0.165346	48.7605	2.89204e-12	5.88111e-10
comp2276795_c0_seq4	2.5246	4.7065	48.6875	3.00176e-12	6.08049e-10
comp2258775_c0_seq1	4.11576	-0.227044	48.6381	3.07823e-12	6.21123e-10
comp2272828_c0_seq8	2.60051	4.54052	48.6298	3.09142e-12	6.21375e-10
comp2261344_c0_seq3	2.58138	3.80383	48.6055	3.12996e-12	6.26701e-10
comp2269151_c0_seq2	3.85458	0.911324	48.5937	3.14873e-12	6.28044e-10
comp2259648_c0_seq1	-4.54639	0.756458	48.5285	3.25521e-12	6.46806e-10
comp2272075_c0_seq4	4.00936	2.2585	48.4511	3.38634e-12	6.70303e-10
comp2261322_c0_seq1	6.47218	-1.62573	48.404	3.46862e-12	6.82925e-10
comp2276073_c0_seq1	3.90827	1.96539	48.3996	3.47635e-12	6.82925e-10
comp2232805_c0_seq1	3.28542	6.35226	48.3827	3.50656e-12	6.86271e-10
comp2263702_c0_seq1	3.65439	3.30368	48.2969	3.66339e-12	7.14279e-10
comp2262714_c0_seq1	3.47013	2.50719	48.2759	3.70267e-12	7.19243e-10
comp2271937_c0_seq1	3.78764	0.223813	48.1926	3.86336e-12	7.47669e-10
comp2236259_c0_seq1	-2.66665	9.56399	48.1322	3.9843e-12	7.68217e-10
comp2261649_c0_seq2	-3.43141	2.31486	48.1028	4.04448e-12	7.76943e-10
comp2254433_c0_seq1	-4.05045	3.01064	48.051	4.15267e-12	7.94794e-10
comp2256548_c0_seq1	4.15077	-0.310751	47.8915	4.50475e-12	8.59022e-10
comp2239558_c0_seq1	3.71331	0.210689	47.6501	5.09508e-12	9.68047e-10
comp2272870_c0_seq2	4.17499	1.97089	47.6289	5.15039e-12	9.74997e-10
comp2199263_c0_seq2	-3.60871	5.73415	47.5747	5.29478e-12	9.98699e-10
comp2267061_c1_seq8	4.03683	4.93314	47.5351	5.40285e-12	1.0154e-09
comp2276641_c1_seq16	5.14403	7.07767	47.5271	5.42483e-12	1.01587e-09
comp2246491_c0_seq2	-3.07472	2.79981	47.2247	6.32987e-12	1.1811e-09
comp2273485_c0_seq5	2.52705	5.34253	47.1518	6.56978e-12	1.22149e-09
comp2240347_c0_seq3	3.95916	2.16656	47.1017	6.73956e-12	1.24859e-09
comp2239691_c0_seq1	-3.7921	8.78764	47.0744	6.8341e-12	1.26162e-09
comp2268858_c0_seq10	-2.16541	5.45915	46.7703	7.98152e-12	1.46823e-09
comp2253317_c0_seq1	2.45607	4.82694	46.6902	8.3144e-12	1.52408e-09
comp2276257_c0_seq6	2.42782	3.81837	46.68	8.35784e-12	1.52667e-09
comp2262241_c0_seq1	-3.26577	5.3541	46.647	8.49975e-12	1.54716e-09
comp2278475_c0_seq14	2.05494	6.57081	46.4952	9.18425e-12	1.66593e-09
comp2253186_c0_seq1	-3.11765	7.12488	46.4762	9.27404e-12	1.67638e-09
comp2272968_c0_seq3	-5.33903	1.55246	46.1706	1.08394e-11	1.95255e-09
comp2260860_c0_seq2	-2.5576	4.58786	46.0312	1.16384e-11	2.08925e-09
comp2277610_c0_seq1	3.78334	3.37637	46.0162	1.17276e-11	2.09804e-09
comp2278290_c0_seq15	2.69577	6.8947	45.9878	1.18989e-11	2.12138e-09
comp2272319_c0_seq24	3.06034	10.018	45.9587	1.20775e-11	2.14589e-09
comp2257406_c0_seq1	8.22597	1.06536	45.8182	1.2975e-11	2.2975e-09
comp2276099_c0_seq2	-2.35464	3.17056	45.7105	1.37089e-11	2.41922e-09
comp2273919_c0_seq1	2.76602	5.54772	45.6158	1.43878e-11	2.53046e-09
comp2278398_c0_seq2	-4.02943	3.44077	45.4013	1.6053e-11	2.81381e-09
comp2265722_c0_seq1	-2.88912	2.73952	45.3908	1.61389e-11	2.81937e-09
comp2250283_c0_seq1	5.95502	-0.864642	45.1514	1.82379e-11	3.17542e-09
comp2264636_c0_seq1	-1.99332	4.70034	45.1324	1.84155e-11	3.19564e-09
comp2278536_c1_seq38	-2.60921	8.80251	44.983	1.98753e-11	3.4375e-09
comp2276761_c0_seq5	-3.16015	2.9632	44.9507	2.02061e-11	3.48314e-09
comp2142646_c0_seq4	-4.21683	9.36324	44.8917	2.08238e-11	3.57777e-09
comp2278279_c1_seq4	2.75521	7.28482	44.6687	2.33358e-11	3.99618e-09
comp2275350_c0_seq1	2.18532	5.58779	44.5654	2.46007e-11	4.18737e-09
comp2277060_c0_seq17	-3.14376	2.02912	44.5644	2.46131e-11	4.18737e-09
comp2226073_c0_seq2	5.70566	-0.34317	44.5139	2.5256e-11	4.28274e-09
comp2273103_c0_seq8	-2.54518	4.14363	44.5003	2.54312e-11	4.29846e-09
comp2259280_c0_seq3	4.91376	0.945067	44.4036	2.67195e-11	4.5016e-09
comp2267710_c1_seq1	-4.30291	1.66814	44.2198	2.935e-11	4.92881e-09
comp2253348_c0_seq1	4.26955	-0.0712663	44.2124	2.94613e-11	4.9316e-09
comp2254431_c0_seq4	2.34232	1.46185	44.174	3.00441e-11	5.01302e-09
comp2225064_c0_seq1	3.12161	2.41304	44.1216	3.08598e-11	5.13269e-09
comp2247082_c0_seq2	-2.77695	6.04678	44.0745	3.16114e-11	5.24095e-09
comp2246605_c0_seq1	-2.21419	7.149	44.0307	3.23265e-11	5.3425e-09
comp2277010_c0_seq2	-3.59591	3.2565	43.9129	3.43323e-11	5.65603e-09
comp2278282_c0_seq5	3.5318	4.47905	43.7299	3.76966e-11	6.19068e-09
comp2262537_c0_seq3	4.57217	0.390727	43.6715	3.88378e-11	6.35804e-09
comp2259757_c0_seq3	5.32955	0.0647173	43.4006	4.46041e-11	7.27914e-09
comp2268582_c0_seq4	-3.23729	1.48786	43.3862	4.4935e-11	7.31022e-09
comp2261061_c0_seq1	3.13618	1.45867	43.3274	4.63046e-11	7.50956e-09
comp2269391_c0_seq1	-2.64769	3.64301	43.3048	4.68431e-11	7.57331e-09
comp2257855_c0_seq2	4.95997	0.240534	43.1173	5.15555e-11	8.30937e-09
comp2265255_c2_seq1	-4.24706	9.64754	43.0365	5.37279e-11	8.63278e-09
comp2256831_c0_seq1	-3.12008	3.66835	42.8344	5.95764e-11	9.54304e-09
comp2275022_c0_seq1	2.41802	6.9202	42.8188	6.00514e-11	9.58962e-09
comp2262844_c0_seq2	3.85273	1.065	42.667	6.48985e-11	1.0332e-08
comp1194082_c0_seq1	-2.37372	3.47437	42.5818	6.77876e-11	1.0759e-08
comp2253924_c0_seq2	3.54781	4.58913	42.5668	6.83087e-11	1.08088e-08
comp2275110_c1_seq5	3.08876	9.6206	42.48	7.14078e-11	1.12649e-08
comp2246956_c0_seq1	-2.943	2.61846	42.3878	7.48558e-11	1.17732e-08
comp2275883_c1_seq1	2.82046	4.6496	42.3694	7.55646e-11	1.18488e-08
comp2272887_c1_seq2	3.56258	4.01103	42.2515	8.02595e-11	1.25472e-08
comp2265504_c0_seq1	3.05711	1.42862	42.1934	8.26777e-11	1.28866e-08
comp2262129_c0_seq3	3.39504	2.83693	42.1437	8.48053e-11	1.3156e-08
comp2276446_c0_seq2	2.25676	6.00528	42.1413	8.49118e-11	1.3156e-08
comp2236889_c0_seq1	3.07382	0.936533	42.0168	9.04939e-11	1.39793e-08
comp2244718_c0_seq4	-4.30401	0.164129	41.9619	9.30702e-11	1.43046e-08
comp2271756_c0_seq2	3.827	5.38343	41.9602	9.31493e-11	1.43046e-08
comp2193521_c0_seq1	-5.23603	-0.0715603	41.7739	1.02464e-10	1.56887e-08
comp2277815_c0_seq5	3.43334	6.5014	41.6774	1.07646e-10	1.64339e-08
comp2275031_c2_seq2	-3.5746	2.10686	41.6652	1.08319e-10	1.64882e-08
comp2268243_c0_seq2	3.03991	1.08163	41.6141	1.11191e-10	1.68761e-08
comp2268625_c0_seq3	-2.51569	3.08063	41.5591	1.14364e-10	1.73071e-08
comp2265254_c0_seq1	-3.65075	4.04266	41.5325	1.15929e-10	1.74932e-08
comp2278062_c0_seq4	4.84829	6.68861	41.5254	1.16351e-10	1.75062e-08
comp2264803_c1_seq1	-3.11264	1.3105	41.4952	1.18161e-10	1.77272e-08
comp2253801_c0_seq1	3.38514	3.26888	41.4168	1.22996e-10	1.83502e-08
comp2268375_c0_seq1	-2.72647	5.46666	41.4164	1.23019e-10	1.83502e-08
comp2252017_c0_seq1	-4.11009	0.332666	41.4007	1.24016e-10	1.84461e-08
comp2252193_c0_seq2	-3.23759	3.97713	41.2987	1.30657e-10	1.93785e-08
gene19	3.68813	1.23873	41.2195	1.3606e-10	2.01225e-08
comp2276707_c0_seq1	2.74467	4.43751	41.1871	1.38335e-10	2.04011e-08
comp2254641_c1_seq1	-2.94682	4.51679	41.1393	1.41758e-10	2.08117e-08
comp2268018_c0_seq3	4.17233	0.708255	41.1371	1.41919e-10	2.08117e-08
comp2176475_c0_seq1	4.54559	-0.473983	40.9479	1.56343e-10	2.28625e-08
gnl|Pdu_trscr_assembly_1|15590	-4.46273	5.68301	40.8762	1.62187e-10	2.36506e-08
comp2251106_c0_seq1	-3.93549	9.33986	40.8613	1.63429e-10	2.37652e-08
comp2249950_c0_seq1	3.66093	0.134266	40.7983	1.68777e-10	2.44746e-08
comp2241228_c0_seq2	-2.84608	5.2411	40.7913	1.69382e-10	2.44941e-08
comp2275926_c0_seq2	-2.7423	3.81679	40.7792	1.70435e-10	2.4578e-08
comp2277984_c0_seq7	2.31313	4.36216	40.6429	1.82749e-10	2.62811e-08
gnl|Pdu_trscr_assembly_1|13616	-2.94701	2.68677	40.6137	1.85499e-10	2.6603e-08
gnl|Pdu_trscr_assembly_1|1902	2.75296	4.78533	40.4711	1.99545e-10	2.85387e-08
comp2271417_c0_seq5	2.44476	2.81633	40.4255	2.04263e-10	2.91334e-08
comp2258876_c0_seq1	-4.23229	1.12762	40.3599	2.11229e-10	3.00447e-08
comp2272887_c0_seq5	2.94343	2.05849	40.3106	2.16628e-10	3.07287e-08
comp2259418_c0_seq1	-2.47798	2.46136	40.2717	2.20983e-10	3.12614e-08
comp2267745_c0_seq3	3.01198	0.30263	40.2194	2.26985e-10	3.19725e-08
gnl|Pdu_trscr_assembly_1|86887	2.80907	6.40276	40.2172	2.27239e-10	3.19725e-08
comp2257668_c0_seq1	4.18343	-0.638354	40.1708	2.32704e-10	3.26532e-08
comp2269539_c0_seq1	-4.94428	1.07563	40.1614	2.33826e-10	3.27225e-08
comp2266075_c0_seq5	3.30846	3.70138	40.1544	2.34662e-10	3.27515e-08
comp2246063_c0_seq1	-2.62403	2.39976	40.1416	2.36205e-10	3.28786e-08
comp2276523_c0_seq2	2.50293	9.79618	40.1304	2.37565e-10	3.29797e-08
comp2259351_c0_seq1	-2.36903	2.23129	40.0458	2.48079e-10	3.43322e-08
comp2270604_c0_seq3	-2.20384	6.97882	40.0415	2.48626e-10	3.43322e-08
comp2243810_c0_seq2	2.59164	5.63164	39.9544	2.59958e-10	3.5802e-08
comp2276124_c0_seq3	2.92606	6.1381	39.9482	2.60785e-10	3.58212e-08
comp2259694_c0_seq2	-3.50347	1.78892	39.9307	2.6314e-10	3.60495e-08
comp2273169_c2_seq2	2.63553	5.60753	39.8921	2.68393e-10	3.66726e-08
comp2261738_c0_seq5	2.10634	4.528	39.8742	2.70864e-10	3.69134e-08
gnl|Pdu_trscr_assembly_1|945	-3.2959	1.55102	39.5478	3.20128e-10	4.34908e-08
comp2237419_c0_seq1	-3.26121	1.22614	39.5437	3.20799e-10	4.34908e-08
comp2276904_c0_seq6	3.24077	4.31562	39.5384	3.2167e-10	4.34956e-08
comp2273171_c1_seq1	-2.97009	1.98424	39.4669	3.3366e-10	4.5e-08
comp2270061_c0_seq1	3.63991	1.79939	39.457	3.35363e-10	4.51129e-08
comp2277945_c0_seq2	-2.17248	7.75974	39.4443	3.37552e-10	4.52902e-08
comp2233130_c0_seq1	4.05577	-1.45937	39.3711	3.50448e-10	4.68997e-08
comp2270986_c0_seq3	3.66439	0.599684	39.3282	3.58229e-10	4.77485e-08
comp2259832_c0_seq2	2.45744	5.15203	39.326	3.58625e-10	4.77485e-08
comp2221859_c0_seq1	6.06964	0.0604772	39.205	3.8156e-10	5.06725e-08
comp2278595_c0_seq12	-2.47844	5.7879	39.19	3.84505e-10	5.09337e-08
comp2248121_c0_seq5	4.74901	-1.83184	38.9381	4.37463e-10	5.77249e-08
comp2270871_c1_seq12	-3.26575	5.34003	38.9326	4.38684e-10	5.77249e-08
comp2268972_c0_seq3	3.12134	3.00943	38.9308	4.39099e-10	5.77249e-08
comp2259637_c0_seq1	-4.23161	0.171395	38.8894	4.48508e-10	5.88134e-08
comp2253903_c0_seq1	-3.86509	3.16063	38.7948	4.70788e-10	6.14307e-08
comp2239992_c0_seq1	2.28071	2.97811	38.7946	4.70828e-10	6.14307e-08
comp2250174_c0_seq1	3.09344	3.14181	38.7742	4.75785e-10	6.19222e-08
comp2277455_c0_seq2	-2.32967	2.65488	38.6286	5.12623e-10	6.65502e-08
comp2259017_c0_seq2	-2.16457	3.47062	38.5495	5.33821e-10	6.91298e-08
comp2238321_c0_seq1	5.85873	-1.41829	38.4607	5.58669e-10	7.21681e-08
comp2277538_c1_seq1	-3.08865	2.89924	38.3348	5.95908e-10	7.6788e-08
comp2276419_c0_seq10	2.2395	4.10791	38.3023	6.05915e-10	7.78848e-08
comp2263829_c0_seq1	-4.28884	1.82397	38.288	6.10362e-10	7.82631e-08
comp2254606_c0_seq2	2.78149	1.67045	38.2623	6.18463e-10	7.91071e-08
comp2263921_c0_seq2	-2.13088	6.55875	38.1909	6.41508e-10	8.18536e-08
comp2271317_c1_seq3	3.06462	3.11978	38.109	6.69012e-10	8.51543e-08
comp2243104_c0_seq1	-2.85731	2.16828	38.0641	6.84597e-10	8.69254e-08
comp2273491_c0_seq12	-2.67477	1.95857	38.0475	6.90421e-10	8.74517e-08
comp2270156_c0_seq11	-2.34539	6.53881	38.0389	6.93467e-10	8.76243e-08
comp2138995_c0_seq1	3.24989	2.29118	38.029	6.9702e-10	8.78599e-08
comp2270100_c0_seq3	2.44023	4.50507	38.0121	7.03064e-10	8.84077e-08
comp2258209_c0_seq1	1.83049	4.26809	37.9922	7.10272e-10	8.9099e-08
comp2266208_c1_seq3	-2.59609	1.99294	37.9867	7.12285e-10	8.91366e-08
comp2261623_c0_seq1	-3.90504	11.1304	37.9535	7.24506e-10	9.04485e-08
comp2271649_c0_seq1	-3.57093	5.46419	37.9461	7.27254e-10	9.05744e-08
comp2250610_c0_seq2	-3.97313	2.22913	37.938	7.30293e-10	9.07358e-08
comp2269850_c0_seq1	-3.06078	5.63961	37.9219	7.36352e-10	9.12708e-08
comp2275024_c0_seq2	-2.28502	2.56091	37.8175	7.76819e-10	9.60581e-08
comp2267868_c0_seq12	-3.10015	1.69862	37.7839	7.90324e-10	9.74964e-08
comp2263586_c0_seq1	2.17781	3.87303	37.7742	7.94249e-10	9.7749e-08
comp2232850_c0_seq1	5.03308	-1.6424	37.7461	8.05776e-10	9.89338e-08
comp2275643_c1_seq4	4.4753	2.86152	37.7158	8.18377e-10	1.00244e-07
comp2268249_c0_seq4	-3.94056	1.44894	37.6205	8.59346e-10	1.05016e-07
comp2264799_c1_seq2	-2.3554	3.64716	37.6157	8.61466e-10	1.05028e-07
comp2275540_c0_seq12	2.01088	5.54211	37.5888	8.73453e-10	1.06199e-07
comp2271893_c0_seq3	-2.76373	2.86956	37.585	8.75145e-10	1.06199e-07
comp2247532_c0_seq3	-4.55132	0.0736357	37.5177	9.05882e-10	1.09673e-07
comp2253273_c0_seq1	-3.04343	3.45994	37.5093	9.09778e-10	1.09889e-07
comp2253194_c0_seq3	3.723	-0.788813	37.3812	9.71558e-10	1.17079e-07
comp2272387_c1_seq3	-2.4336	2.46156	37.1333	1.10322e-09	1.32639e-07
comp2266901_c1_seq8	2.5146	3.62252	37.1086	1.11729e-09	1.34021e-07
comp2270754_c0_seq3	-3.93854	3.12854	36.9821	1.1922e-09	1.42678e-07
comp1368210_c0_seq1	3.49541	2.07316	36.9206	1.23041e-09	1.46912e-07
comp2272396_c0_seq2	2.53555	4.60791	36.9146	1.23418e-09	1.47026e-07
comp2274248_c0_seq12	4.12881	2.27926	36.8701	1.26268e-09	1.50019e-07
comp2274834_c0_seq1	3.3118	-0.100614	36.8664	1.26507e-09	1.50019e-07
comp2220394_c0_seq1	-2.77468	4.99927	36.8438	1.27985e-09	1.51426e-07
comp2264887_c0_seq4	7.08593	0.62874	36.808	1.30357e-09	1.53883e-07
comp2239692_c0_seq1	-3.64447	1.24283	36.7867	1.31789e-09	1.55221e-07
comp2277837_c0_seq3	-2.81913	2.28691	36.7706	1.32879e-09	1.56153e-07
comp2274804_c0_seq1	-2.12531	5.19789	36.7241	1.36086e-09	1.59561e-07
comp1174362_c0_seq1	3.89472	0.862126	36.3474	1.65097e-09	1.93142e-07
comp2138058_c0_seq1	-4.72276	7.1496	36.2922	1.69842e-09	1.98247e-07
comp2274915_c0_seq1	2.19768	2.70321	36.2281	1.75521e-09	2.04417e-07
comp2257854_c0_seq3	-2.24409	4.02159	36.1859	1.79365e-09	2.08428e-07
comp2243025_c0_seq2	-2.13593	4.95443	36.1558	1.82158e-09	2.11202e-07
comp2267157_c0_seq3	3.80727	3.62802	36.1322	1.84375e-09	2.12599e-07
comp2250674_c0_seq3	-2.59505	1.58025	36.1302	1.84562e-09	2.12599e-07
comp2202319_c1_seq1	-3.1535	1.30742	36.1299	1.84588e-09	2.12599e-07
comp2271992_c0_seq4	3.60551	3.21525	36.0767	1.89706e-09	2.17634e-07
comp2276641_c0_seq2	2.90118	6.71912	36.0757	1.89796e-09	2.17634e-07
comp2262834_c0_seq3	4.18587	2.02076	36.029	1.94403e-09	2.22426e-07
comp2253589_c0_seq1	5.39224	3.90356	36.0132	1.95989e-09	2.2375e-07
comp2265966_c0_seq2	3.12614	3.22923	35.9929	1.98034e-09	2.2559e-07
comp2259852_c1_seq1	2.36314	3.93264	35.9454	2.02924e-09	2.30655e-07
gnl|Pdu_trscr_assembly_1|7335	-3.46287	2.47796	35.8977	2.07959e-09	2.35362e-07
gnl|Pdu_trscr_assembly_1|6033	3.50134	0.773911	35.8976	2.07969e-09	2.35362e-07
comp2139506_c0_seq1	3.54941	2.57736	35.8931	2.08447e-09	2.35391e-07
comp2271648_c0_seq1	-3.21921	1.9138	35.8844	2.09379e-09	2.35588e-07
comp1984701_c0_seq1	-1.94476	5.49228	35.883	2.09526e-09	2.35588e-07
gnl|Pdu_trscr_assembly_1|91632	3.18106	3.81958	35.8723	2.10688e-09	2.36384e-07
comp2270332_c0_seq1	-4.30302	0.271149	35.8614	2.11862e-09	2.3719e-07
comp2275945_c0_seq4	2.42998	5.2339	35.8372	2.14517e-09	2.39646e-07
comp2272124_c0_seq1	-2.441	6.1214	35.83	2.15303e-09	2.4001e-07
comp2266847_c0_seq1	-3.11726	5.40858	35.8105	2.17468e-09	2.41905e-07
comp2267504_c3_seq1	-2.11407	2.19651	35.7213	2.27656e-09	2.52699e-07
comp2260667_c0_seq3	2.48083	0.14033	35.4885	2.56566e-09	2.84182e-07
gene17	2.7344	11.383	35.48	2.57685e-09	2.84815e-07
comp2271808_c0_seq3	3.20833	3.23685	35.46	2.60341e-09	2.87142e-07
comp2268302_c0_seq1	5.05273	5.94579	35.4263	2.64891e-09	2.91543e-07
comp2258180_c0_seq1	3.73553	0.59395	35.3987	2.68666e-09	2.94908e-07
comp2273154_c0_seq3	2.44226	3.32437	35.3957	2.69082e-09	2.94908e-07
comp2268999_c0_seq1	2.36352	4.37636	35.3817	2.71016e-09	2.96404e-07
comp1196706_c0_seq1	-1.92666	6.15122	35.3495	2.75545e-09	3.00725e-07
comp2264254_c0_seq2	-3.74365	0.97467	35.3288	2.78488e-09	3.03302e-07
comp2252902_c0_seq1	4.26215	-0.616181	35.3107	2.81082e-09	3.05487e-07
comp2269979_c1_seq5	2.54908	5.10258	35.3024	2.82282e-09	3.06152e-07
comp2270283_c0_seq4	-2.1328	4.32849	35.2423	2.91128e-09	3.14759e-07
comp2263277_c0_seq1	-3.4671	4.17274	35.2403	2.91427e-09	3.14759e-07
comp2254625_c0_seq1	2.0249	2.62101	35.2022	2.9718e-09	3.20309e-07
comp2248818_c0_seq1	4.46123	-0.132841	35.1762	3.01176e-09	3.23944e-07
comp2253014_c0_seq2	1.7526	7.50481	35.1647	3.02972e-09	3.25204e-07
comp1194329_c0_seq1	-2.04284	5.63685	35.1556	3.04382e-09	3.26046e-07
comp2277510_c3_seq1	-2.27027	2.4824	35.1362	3.07439e-09	3.28645e-07
gnl|Pdu_trscr_assembly_1|16743	-3.31955	1.79146	35.132	3.08091e-09	3.28667e-07
comp2263235_c1_seq1	-4.21632	0.43889	35.1094	3.117e-09	3.31836e-07
comp2244207_c0_seq1	2.52997	2.46688	35.0846	3.15692e-09	3.354e-07
comp2258311_c0_seq2	5.09817	-0.809619	35.0478	3.2171e-09	3.41098e-07
comp2234453_c0_seq2	-3.28284	3.78243	35.0376	3.23394e-09	3.42186e-07
comp2261379_c0_seq1	-2.43069	11.4548	35.0142	3.27315e-09	3.45633e-07
comp2261589_c0_seq1	3.04022	0.183394	34.9655	3.35597e-09	3.53661e-07
comp2266805_c1_seq1	-2.54506	1.55528	34.9257	3.42531e-09	3.60239e-07
comp2277376_c0_seq3	-3.69399	3.63598	34.9177	3.43949e-09	3.60276e-07
gnl|Pdu_trscr_assembly_1|760	2.36215	3.02978	34.9176	3.43951e-09	3.60276e-07
comp1193769_c0_seq1	-3.27919	3.91694	34.9113	3.45076e-09	3.6073e-07
comp2271837_c0_seq3	2.57585	2.09249	34.9022	3.46695e-09	3.61695e-07
comp2258227_c1_seq1	-2.77219	1.92498	34.8969	3.47638e-09	3.61954e-07
comp2241847_c0_seq5	-3.05443	1.15812	34.8526	3.55632e-09	3.69538e-07
comp2275901_c0_seq1	-2.08811	2.98159	34.8365	3.58592e-09	3.71871e-07
comp2276495_c0_seq1	2.36118	1.63279	34.776	3.699e-09	3.82835e-07
comp2269714_c0_seq2	-3.45854	1.66919	34.76	3.72962e-09	3.85239e-07
comp2248557_c0_seq1	4.25349	-0.272561	34.732	3.78355e-09	3.90035e-07
comp2265014_c0_seq1	2.873	4.64452	34.6769	3.89225e-09	4.00448e-07
comp2269922_c0_seq1	5.67413	-0.715526	34.6069	4.03465e-09	4.1428e-07
comp2270240_c0_seq1	2.87924	7.5361	34.5791	4.09276e-09	4.1942e-07
comp2269818_c0_seq2	-2.44908	3.03527	34.4895	4.28555e-09	4.38314e-07
comp2276165_c0_seq6	3.01635	7.08318	34.4726	4.32293e-09	4.41269e-07
comp2232817_c0_seq2	2.94637	3.76246	34.4608	4.34929e-09	4.43091e-07
comp2256027_c0_seq2	-4.00068	1.16035	34.4224	4.43589e-09	4.51031e-07
comp1956628_c0_seq1	3.99912	0.810663	34.3756	4.54388e-09	4.61111e-07
comp1195529_c0_seq1	3.88388	0.695284	34.2959	4.73381e-09	4.78785e-07
comp2261996_c0_seq2	-3.26251	3.71347	34.2948	4.73644e-09	4.78785e-07
comp2266311_c1_seq2	-2.75344	2.10078	34.2506	4.84515e-09	4.88825e-07
comp2266755_c0_seq1	-1.90935	5.87881	34.2076	4.95343e-09	4.98782e-07
comp2214176_c0_seq1	-2.4526	2.06841	34.1087	5.21187e-09	5.23793e-07
comp2201258_c0_seq1	3.43074	-0.167625	34.014	5.4718e-09	5.48856e-07
comp2264330_c2_seq2	-3.48957	1.27888	33.9779	5.57426e-09	5.58059e-07
comp2259861_c0_seq1	-2.82529	1.89026	33.9636	5.61528e-09	5.61086e-07
comp2273404_c0_seq1	4.00074	6.18067	33.9228	5.73415e-09	5.71866e-07
comp2272098_c0_seq6	-3.64542	2.09217	33.8619	5.91673e-09	5.88946e-07
comp2184756_c0_seq1	5.71344	-1.23522	33.8319	6.00851e-09	5.96941e-07
comp2263235_c0_seq3	-4.39197	-0.603222	33.7913	6.13527e-09	6.08373e-07
comp2277503_c1_seq4	2.15478	2.77919	33.7717	6.19744e-09	6.12864e-07
comp2253152_c0_seq1	-2.08898	5.57145	33.7696	6.2041e-09	6.12864e-07
comp2273445_c0_seq4	3.12037	0.938173	33.7491	6.26986e-09	6.18187e-07
comp2271225_c0_seq5	-2.87297	10.2875	33.6747	6.51409e-09	6.4098e-07
comp2243948_c0_seq4	2.62601	1.9804	33.6713	6.52566e-09	6.4098e-07
comp2138971_c0_seq1	-2.07461	3.66013	33.5938	6.79082e-09	6.65769e-07
comp2272814_c0_seq4	2.5974	4.82038	33.5427	6.97177e-09	6.82224e-07
comp2266442_c0_seq5	-3.28427	1.46981	33.4907	7.16044e-09	6.99372e-07
comp2264429_c0_seq2	2.80601	1.07649	33.4756	7.2165e-09	7.03527e-07
comp2276257_c2_seq1	2.9969	1.12071	33.4169	7.43764e-09	7.23731e-07
comp2267060_c0_seq1	-2.75531	2.88976	33.4124	7.45467e-09	7.24035e-07
comp2226803_c0_seq1	4.64686	0.804391	33.3941	7.52518e-09	7.29522e-07
comp2270281_c0_seq1	-2.43245	2.06514	33.3683	7.6257e-09	7.37893e-07
comp2265878_c0_seq2	-2.88111	2.9003	33.3424	7.72807e-09	7.46411e-07
comp2253491_c1_seq2	-3.34788	0.990533	33.3109	7.85425e-09	7.57194e-07
comp2254354_c0_seq1	-3.39972	0.768524	33.2936	7.92413e-09	7.62518e-07
comp2216809_c0_seq2	-3.30701	0.811186	33.2759	7.99664e-09	7.68076e-07
comp2241507_c0_seq1	-3.82055	2.77819	33.269	8.02536e-09	7.69415e-07
comp2262901_c0_seq1	1.75045	4.10714	33.1411	8.57062e-09	8.2018e-07
comp2276368_c0_seq9	1.89819	6.17619	33.1067	8.72371e-09	8.33298e-07
comp2278464_c0_seq2	-2.02743	7.52476	33.0857	8.81838e-09	8.40798e-07
comp2272098_c1_seq1	-4.64537	0.470825	32.9994	9.2185e-09	8.77342e-07
comp2261787_c0_seq1	2.7929	2.34648	32.9829	9.29713e-09	8.8321e-07
comp2279734_c0_seq1	-2.45663	2.29732	32.9757	9.33184e-09	8.84893e-07
comp2269277_c0_seq3	-2.56629	7.21786	32.7715	1.03654e-08	9.81115e-07
comp2247108_c0_seq2	4.18792	-1.47874	32.6608	1.09728e-08	1.03672e-06
comp1975390_c0_seq1	-2.79862	2.78196	32.6465	1.10537e-08	1.04247e-06
comp2273152_c0_seq2	1.76172	5.19464	32.6189	1.12116e-08	1.05546e-06
comp2277921_c0_seq1	2.03754	6.16406	32.598	1.13329e-08	1.06364e-06
gnl|Pdu_trscr_assembly_1|19656	-2.93919	2.33017	32.5953	1.1349e-08	1.06364e-06
comp2272356_c0_seq4	1.8738	4.61241	32.5934	1.13599e-08	1.06364e-06
comp2257382_c0_seq3	-3.85454	9.33411	32.5739	1.14748e-08	1.07091e-06
comp2254385_c0_seq3	-3.01134	1.56482	32.5732	1.14786e-08	1.07091e-06
comp2265006_c0_seq2	1.85936	3.92453	32.5665	1.15184e-08	1.07269e-06
comp2258290_c0_seq1	-3.51949	3.22486	32.5618	1.15462e-08	1.07336e-06
comp2237121_c0_seq1	2.3288	4.23917	32.553	1.15987e-08	1.07632e-06
comp2277503_c0_seq1	2.07454	3.78982	32.5332	1.17176e-08	1.08542e-06
comp2267375_c0_seq3	2.37173	1.90662	32.5127	1.18417e-08	1.09497e-06
comp2275732_c0_seq3	2.94466	2.17021	32.4901	1.19801e-08	1.1058e-06
comp2242437_c0_seq2	2.9751	-0.536382	32.4847	1.20135e-08	1.10692e-06
comp2277598_c0_seq2	-3.5335	2.38884	32.4724	1.20897e-08	1.11198e-06
comp2274018_c0_seq2	2.16918	3.36411	32.454	1.22047e-08	1.12057e-06
comp2270473_c0_seq2	2.78481	3.90098	32.4038	1.25239e-08	1.14786e-06
comp2257070_c0_seq2	-2.23922	12.9253	32.3695	1.27474e-08	1.16628e-06
comp2259973_c0_seq2	-2.1671	2.8497	32.2992	1.32168e-08	1.20711e-06
comp2271521_c0_seq3	3.10856	1.62956	32.2756	1.33782e-08	1.21971e-06
comp2267696_c0_seq11	3.36202	2.23088	32.2038	1.38816e-08	1.26339e-06
gnl|Pdu_trscr_assembly_1|95352	-3.0877	0.792873	32.196	1.3938e-08	1.26632e-06
comp2276495_c1_seq35	2.72244	4.28118	32.1016	1.46316e-08	1.32702e-06
comp2260778_c0_seq1	3.88056	4.28298	32.0843	1.47624e-08	1.33655e-06
comp2142794_c0_seq1	-2.7847	5.13007	32.0657	1.49042e-08	1.34705e-06
comp2210398_c0_seq1	4.19823	0.0879328	32.0108	1.53319e-08	1.3833e-06
comp2262051_c0_seq1	-3.40435	1.70539	31.9948	1.54584e-08	1.3923e-06
comp2266806_c0_seq8	-3.25939	3.34159	31.9604	1.57349e-08	1.41475e-06
comp2271608_c1_seq1	2.3584	2.24301	31.9426	1.58795e-08	1.42529e-06
comp2266348_c1_seq2	2.05831	5.12471	31.932	1.59666e-08	1.42872e-06
comp2270682_c0_seq1	3.35209	1.48021	31.9313	1.59726e-08	1.42872e-06
comp2275646_c0_seq3	-1.77613	3.85344	31.8933	1.62878e-08	1.45442e-06
comp2275229_c0_seq16	-2.73021	4.94184	31.793	1.7151e-08	1.52887e-06
comp2237006_c0_seq2	-5.1136	1.12094	31.7609	1.74369e-08	1.55027e-06
comp2262211_c0_seq21	2.15624	9.35254	31.7594	1.74506e-08	1.55027e-06
comp2277022_c0_seq15	2.50413	2.96924	31.7477	1.75555e-08	1.55693e-06
comp2260219_c0_seq1	4.82917	-0.0451838	31.725	1.77625e-08	1.57261e-06
comp2227525_c0_seq3	4.09107	-1.96337	31.7153	1.78507e-08	1.57774e-06
comp2277689_c0_seq2	1.98485	7.83318	31.7111	1.78895e-08	1.57849e-06
comp2254291_c0_seq1	5.29264	-2.78491	31.6963	1.80264e-08	1.58788e-06
comp2273387_c0_seq1	-2.99344	2.55445	31.6627	1.8341e-08	1.61286e-06
comp2262000_c0_seq2	2.3523	2.17812	31.6407	1.85496e-08	1.62717e-06
comp2262029_c0_seq1	-3.94145	0.271098	31.639	1.85662e-08	1.62717e-06
comp2267864_c0_seq3	-3.97811	0.152388	31.6122	1.88244e-08	1.64702e-06
comp2268816_c0_seq17	2.50802	2.6076	31.6008	1.89351e-08	1.65393e-06
comp2277723_c2_seq1	-2.98379	3.574	31.5911	1.90303e-08	1.65946e-06
comp2263172_c0_seq5	1.90222	3.58488	31.5833	1.91063e-08	1.6633e-06
comp2146773_c0_seq2	6.42632	-3.15819	31.5724	1.92145e-08	1.66993e-06
comp2221608_c0_seq2	-2.94401	0.0774084	31.5655	1.92826e-08	1.67305e-06
comp2269800_c0_seq22	2.3218	4.95653	31.497	1.99746e-08	1.73021e-06
comp2274991_c2_seq19	-2.07336	3.85759	31.4384	2.05864e-08	1.78024e-06
comp2276806_c0_seq3	2.46557	5.26195	31.4348	2.06248e-08	1.78061e-06
comp2273626_c1_seq1	1.85515	6.01873	31.3863	2.11467e-08	1.82264e-06
comp2277104_c0_seq3	-2.05412	6.14275	31.318	2.19037e-08	1.88477e-06
comp2267951_c0_seq1	2.72521	5.99485	31.2891	2.22319e-08	1.90985e-06
comp2273699_c0_seq8	2.68775	0.878423	31.2802	2.23345e-08	1.9155e-06
comp2253656_c0_seq3	-2.29945	4.56273	31.2593	2.25759e-08	1.93302e-06
comp2278488_c0_seq1	-2.59479	3.76158	31.2451	2.27425e-08	1.94409e-06
comp2274169_c0_seq6	-2.69978	1.97112	31.236	2.28493e-08	1.95002e-06
gi|146189532|emb|AM697680.1|_Platynereis_dumerilii_mRNA_for_hypothetical_protein_(ORF1),_isolate_8	5.89876	-2.04114	31.1398	2.40093e-08	2.04567e-06
comp2264128_c0_seq1	-2.56418	1.78707	31.1321	2.41052e-08	2.05047e-06
comp2274596_c1_seq6	-2.01023	3.21942	31.1288	2.41464e-08	2.05063e-06
comp2275488_c0_seq1	1.76631	4.73891	31.1096	2.43864e-08	2.06764e-06
comp2235766_c0_seq1	-4.64495	1.60549	31.0754	2.48203e-08	2.10101e-06
comp2278291_c0_seq2	2.98976	1.45642	31.0688	2.49037e-08	2.10464e-06
comp2205419_c0_seq2	2.59918	6.46852	31.0196	2.55435e-08	2.15522e-06
comp2269321_c1_seq1	-1.76976	4.45516	31.0141	2.56161e-08	2.15775e-06
comp2225718_c0_seq1	-3.66402	0.349511	31.011	2.56565e-08	2.15775e-06
comp2265803_c0_seq1	-3.13502	1.16663	30.9653	2.6268e-08	2.20562e-06
comp2256950_c0_seq1	-4.31717	-0.130806	30.9441	2.65574e-08	2.22633e-06
comp2278303_c0_seq3	3.56725	3.07915	30.9369	2.66556e-08	2.22897e-06
comp2277927_c4_seq1	-2.7003	2.65103	30.935	2.66823e-08	2.22897e-06
comp2272305_c0_seq1	2.0147	4.16194	30.9324	2.67173e-08	2.22897e-06
comp2273333_c0_seq5	2.00463	4.67714	30.917	2.69302e-08	2.24314e-06
comp2268738_c0_seq1	3.98876	2.05789	30.6233	3.13316e-08	2.60557e-06
comp2264068_c0_seq1	-1.85576	3.99642	30.6068	3.15982e-08	2.62356e-06
comp2257762_c0_seq1	-2.24023	2.02323	30.5664	3.22632e-08	2.6745e-06
comp2268642_c0_seq2	2.50475	1.34809	30.5596	3.23772e-08	2.67969e-06
comp2247702_c0_seq1	7.91742	-1.45933	30.462	3.40471e-08	2.81343e-06
comp2274386_c0_seq5	2.68337	3.97879	30.4566	3.41413e-08	2.81674e-06
comp2028238_c0_seq1	-2.0162	2.25668	30.4034	3.50916e-08	2.89056e-06
comp2271744_c0_seq3	-2.52837	2.94846	30.3846	3.54326e-08	2.91404e-06
comp2272087_c2_seq11	-2.33536	3.17641	30.3359	3.63337e-08	2.98343e-06
comp2275636_c0_seq4	-3.05294	2.5058	30.3076	3.68688e-08	3.0226e-06
comp2272070_c1_seq2	-2.01278	3.57512	30.2586	3.78113e-08	3.095e-06
comp2270901_c0_seq1	-3.6467	0.41182	30.2509	3.79607e-08	3.10235e-06
comp2277143_c0_seq2	2.61916	1.91324	30.2213	3.85443e-08	3.14511e-06
comp2274690_c0_seq14	-1.99981	3.84646	30.2162	3.86474e-08	3.14859e-06
comp2255979_c2_seq1	3.4498	-1.72672	30.1711	3.9556e-08	3.21757e-06
comp2276230_c0_seq1	-2.28728	3.25676	30.1624	3.97345e-08	3.22395e-06
comp2277336_c1_seq6	2.30518	5.54272	30.1612	3.97583e-08	3.22395e-06
comp2277237_c0_seq2	1.65411	4.56048	30.1535	3.99167e-08	3.23176e-06
comp2268232_c0_seq1	-3.12606	0.593212	30.1459	4.00737e-08	3.23944e-06
comp2278512_c0_seq10	2.19215	8.28992	30.1386	4.02235e-08	3.2465e-06
comp2269213_c0_seq3	2.70983	3.3485	30.1002	4.10281e-08	3.30632e-06
comp2271953_c0_seq4	-1.52091	5.20942	30.0888	4.12705e-08	3.32071e-06
comp2265366_c0_seq1	2.14017	3.028	30.0377	4.23722e-08	3.4041e-06
comp2259227_c0_seq1	-2.10556	7.31625	29.9829	4.35871e-08	3.49631e-06
comp2264981_c1_seq2	-2.85753	0.526105	29.9316	4.47558e-08	3.57947e-06
comp2280482_c0_seq1	-2.66829	2.96207	29.9314	4.47615e-08	3.57947e-06
comp2222988_c0_seq1	-3.23125	1.06278	29.906	4.53517e-08	3.62111e-06
comp2276978_c1_seq1	-2.74884	3.16986	29.9001	4.54885e-08	3.62647e-06
comp2273607_c0_seq2	-3.15811	1.00615	29.8801	4.59599e-08	3.65845e-06
comp2276721_c0_seq4	-2.75663	1.90522	29.8368	4.69997e-08	3.72808e-06
comp1195550_c0_seq2	3.84219	-1.53874	29.835	4.70427e-08	3.72808e-06
comp2276039_c0_seq1	1.83466	5.3818	29.8347	4.70494e-08	3.72808e-06
comp2270680_c0_seq2	2.03019	3.39877	29.8159	4.75068e-08	3.7586e-06
comp1725465_c0_seq2	6.73559	-1.4051	29.7919	4.8099e-08	3.79967e-06
comp2267666_c0_seq3	2.37597	2.1726	29.78	4.83954e-08	3.81496e-06
comp2277656_c2_seq1	-3.17849	2.12069	29.7783	4.84391e-08	3.81496e-06
comp2251338_c0_seq8	-2.56562	2.15876	29.7663	4.87391e-08	3.83279e-06
comp2254339_c0_seq1	-2.32087	1.6754	29.7341	4.95546e-08	3.88619e-06
comp2278340_c0_seq7	-2.75478	1.93031	29.7336	4.95674e-08	3.88619e-06
comp2267763_c1_seq7	-2.28295	3.37886	29.7268	4.97427e-08	3.89407e-06
comp2265341_c0_seq2	-2.90639	0.476588	29.6798	5.0962e-08	3.98353e-06
comp2267586_c4_seq1	-3.81425	-0.438626	29.6589	5.15144e-08	4.02067e-06
comp2259293_c0_seq1	-3.00119	1.10453	29.6555	5.16068e-08	4.02185e-06
comp2274951_c0_seq5	-2.25939	2.24789	29.6518	5.17049e-08	4.02348e-06
comp2270649_c0_seq5	2.45018	4.73047	29.6378	5.20792e-08	4.04318e-06
comp2269619_c0_seq1	3.26476	5.0999	29.6337	5.219e-08	4.04318e-06
comp2252742_c0_seq1	6.31996	0.752331	29.6336	5.2191e-08	4.04318e-06
comp2274586_c0_seq4	2.04662	3.83258	29.6198	5.25644e-08	4.06605e-06
comp1943186_c0_seq1	-2.78173	2.15155	29.615	5.26967e-08	4.07024e-06
comp2273202_c0_seq1	3.43184	-0.0135399	29.602	5.305e-08	4.09145e-06
comp1281272_c0_seq1	-2.61155	4.55933	29.5969	5.31894e-08	4.09614e-06
comp2271913_c0_seq11	-2.25739	5.42741	29.5697	5.39416e-08	4.14792e-06
comp2274386_c1_seq3	1.93084	3.40708	29.5492	5.45162e-08	4.18593e-06
comp2272881_c0_seq1	2.49014	1.93691	29.5424	5.47066e-08	4.19436e-06
comp2275489_c0_seq1	-2.69254	1.35222	29.5166	5.54399e-08	4.24433e-06
comp2275773_c0_seq15	2.09038	3.08891	29.5099	5.56315e-08	4.25274e-06
comp2261993_c0_seq1	-1.78463	7.5215	29.4655	5.69217e-08	4.34467e-06
comp2273169_c1_seq1	2.4539	2.63844	29.4619	5.70269e-08	4.34467e-06
comp2247421_c0_seq10	-1.86158	4.37042	29.4596	5.70954e-08	4.34467e-06
comp2275107_c0_seq4	-2.41913	6.66344	29.4571	5.71678e-08	4.34467e-06
comp2212006_c0_seq1	7.67026	-3.32693	29.4029	5.87883e-08	4.46131e-06
comp2269109_c0_seq7	-2.19769	1.7968	29.3788	5.95258e-08	4.51071e-06
comp2226033_c0_seq1	2.46682	1.58725	29.3685	5.98418e-08	4.52806e-06
comp2261886_c0_seq2	2.74214	3.52685	29.3424	6.06549e-08	4.58292e-06
comp2246432_c0_seq1	-3.05108	3.45319	29.3297	6.10527e-08	4.60629e-06
comp1665789_c0_seq1	-5.45375	1.09754	29.3198	6.1364e-08	4.62308e-06
comp2241308_c0_seq1	-2.27114	2.16424	29.2559	6.34237e-08	4.77135e-06
comp2276996_c0_seq5	1.72494	7.12666	29.2413	6.3902e-08	4.80039e-06
comp2273199_c1_seq30	1.85067	6.30202	29.2236	6.44896e-08	4.83755e-06
comp2275569_c0_seq2	3.54591	3.52023	29.2091	6.4973e-08	4.8668e-06
comp2197371_c0_seq1	5.44064	-0.644088	29.206	6.50767e-08	4.86757e-06
comp2260132_c0_seq1	-3.40542	-0.0815118	29.1757	6.61016e-08	4.93713e-06
comp2257264_c1_seq1	-2.43105	3.95052	29.172	6.62286e-08	4.93953e-06
comp2274652_c0_seq1	-2.34618	2.17883	29.1215	6.79773e-08	5.0627e-06
comp2271477_c1_seq2	-2.45238	3.8828	29.0898	6.91002e-08	5.13301e-06
comp2261892_c0_seq2	-3.09087	1.78839	29.0893	6.91185e-08	5.13301e-06
comp2273721_c0_seq12	-2.06726	2.61388	29.0685	6.98639e-08	5.18098e-06
comp2250842_c0_seq2	3.22861	0.684224	29.0612	7.01278e-08	5.19315e-06
comp1971890_c0_seq1	-2.95718	1.06338	29.0422	7.08187e-08	5.22987e-06
comp2141714_c0_seq1	3.30345	4.02052	29.042	7.08247e-08	5.22987e-06
comp2270081_c0_seq3	2.25652	3.22158	29.0335	7.11391e-08	5.24565e-06
comp2138099_c0_seq1	-2.95337	3.66855	28.9915	7.26962e-08	5.34889e-06
comp2268827_c0_seq4	2.25437	1.00507	28.9902	7.27447e-08	5.34889e-06
gnl|Pdu_trscr_assembly_1|10810	1.59668	6.19172	28.8921	7.65239e-08	5.61884e-06
comp2269374_c0_seq3	-1.6967	7.46048	28.8774	7.71081e-08	5.65376e-06
comp2235151_c0_seq1	-3.24087	0.40054	28.8432	7.8479e-08	5.74619e-06
comp2265919_c1_seq23	-2.40766	5.67732	28.8293	7.90479e-08	5.77971e-06
comp2271554_c1_seq2	2.34266	1.87556	28.82	7.94274e-08	5.79932e-06
comp2265590_c1_seq4	-2.64243	2.5763	28.8003	8.02395e-08	5.8504e-06
comp2273696_c0_seq2	2.38	1.49576	28.7698	8.15125e-08	5.93491e-06
gnl|Pdu_trscr_assembly_1|200732	-2.7682	8.313	28.7406	8.27505e-08	6.01663e-06
comp2269959_c0_seq1	2.19399	2.91419	28.692	8.48523e-08	6.16085e-06
comp2272742_c0_seq4	-2.83637	4.51836	28.6497	8.67259e-08	6.28811e-06
comp2261064_c0_seq1	2.31663	4.57562	28.6399	8.71691e-08	6.30382e-06
comp2272497_c1_seq1	-3.31252	1.56299	28.6395	8.71847e-08	6.30382e-06
comp2278597_c0_seq3	-2.2205	5.44091	28.6204	8.80504e-08	6.35758e-06
comp2265896_c0_seq2	-3.25633	1.96339	28.5434	9.16225e-08	6.60634e-06
comp2274736_c0_seq12	4.91015	2.19721	28.5231	9.25884e-08	6.66675e-06
comp1326591_c0_seq1	-3.33087	0.548205	28.4615	9.55802e-08	6.87267e-06
comp2278436_c0_seq3	-1.72505	6.38011	28.4064	9.83409e-08	7.06142e-06
gnl|Pdu_trscr_assembly_1|7133	1.8843	2.60481	28.3849	9.94376e-08	7.13033e-06
comp2272257_c1_seq3	-1.64159	6.39	28.3352	1.02023e-07	7.30563e-06
comp2274474_c0_seq5	-1.7093	6.32463	28.3303	1.02283e-07	7.31418e-06
comp2239709_c0_seq1	4.12309	0.277567	28.3227	1.02683e-07	7.33276e-06
comp2274190_c0_seq1	2.18171	5.94023	28.2429	1.07004e-07	7.63085e-06
comp2267553_c0_seq3	2.85287	1.69921	28.2269	1.07895e-07	7.68384e-06
comp2278373_c0_seq1	-2.29311	6.2775	28.2068	1.09018e-07	7.75325e-06
comp2142514_c0_seq2	-2.85923	1.34406	28.1939	1.09748e-07	7.79449e-06
comp2263738_c0_seq2	1.47302	4.70776	28.1799	1.10548e-07	7.84064e-06
comp2250056_c0_seq1	-2.1373	3.92155	28.1691	1.11167e-07	7.87379e-06
comp2260101_c0_seq2	-2.65086	2.21891	28.165	1.11399e-07	7.87951e-06
comp2276865_c1_seq1	2.17304	2.61963	28.1604	1.11667e-07	7.88776e-06
comp2272428_c0_seq1	1.88843	4.87476	28.1512	1.12198e-07	7.91451e-06
comp2250036_c0_seq1	-2.37929	4.23115	28.1347	1.13161e-07	7.97168e-06
comp2256613_c0_seq1	-2.56919	5.18931	28.1218	1.13918e-07	8.00543e-06
comp2275466_c0_seq14	1.88099	4.92462	28.1202	1.14011e-07	8.00543e-06
comp2259529_c0_seq1	-2.13655	5.86214	28.1186	1.14102e-07	8.00543e-06
comp2267342_c0_seq3	-3.29281	-0.422465	28.0916	1.15707e-07	8.10714e-06
comp2279383_c0_seq1	2.32367	3.249	28.0752	1.16692e-07	8.16516e-06
comp2279244_c0_seq1	-1.61896	5.83816	28.0724	1.16863e-07	8.16611e-06
comp2266932_c0_seq2	1.74162	5.9657	28.0432	1.18637e-07	8.27902e-06
comp2250208_c0_seq1	-3.62389	1.3047	28.031	1.19386e-07	8.30961e-06
comp2271101_c0_seq1	1.85805	4.57193	28.0309	1.19395e-07	8.30961e-06
comp2227194_c1_seq1	-3.21628	1.22749	28.0218	1.19955e-07	8.33744e-06
comp2229846_c0_seq1	4.51097	4.07165	27.9511	1.24422e-07	8.6348e-06
comp2256031_c0_seq1	-5.65106	0.711461	27.9488	1.24565e-07	8.6348e-06
comp2274048_c0_seq2	2.13399	4.60147	27.937	1.25332e-07	8.67643e-06
comp2238789_c0_seq1	2.90234	1.05315	27.8983	1.27863e-07	8.83984e-06
comp1615018_c0_seq1	-2.23348	4.08433	27.8892	1.28467e-07	8.86983e-06
comp2140459_c0_seq2	5.06536	1.09739	27.8783	1.29193e-07	8.90001e-06
comp2234671_c0_seq1	2.03592	4.75343	27.8775	1.29246e-07	8.90001e-06
comp2269305_c0_seq1	-1.52555	6.31849	27.839	1.31839e-07	9.05588e-06
comp2257281_c0_seq1	-2.33632	2.91377	27.8388	1.31857e-07	9.05588e-06
comp2279736_c0_seq1	-1.89739	5.24792	27.7987	1.34619e-07	9.2334e-06
comp2245338_c0_seq1	-3.91845	-0.378219	27.7944	1.34914e-07	9.24145e-06
comp2253037_c0_seq10	-3.34534	2.25318	27.7814	1.35824e-07	9.29153e-06
comp2277416_c0_seq3	-2.90139	7.29419	27.7724	1.36459e-07	9.32276e-06
comp2268497_c0_seq1	-1.74058	3.26857	27.7667	1.36859e-07	9.33778e-06
comp2273758_c0_seq1	2.11645	5.93247	27.6433	1.45877e-07	9.94004e-06
comp2248643_c1_seq1	3.53846	2.93408	27.6323	1.46706e-07	9.98352e-06
comp2232773_c0_seq1	-1.98735	1.83753	27.6006	1.49129e-07	1.01341e-05
comp2275893_c0_seq1	-3.03699	7.97309	27.5983	1.49309e-07	1.01341e-05
comp2272047_c0_seq1	-2.16286	2.29528	27.5891	1.50018e-07	1.01561e-05
comp2277462_c0_seq1	-2.65436	1.7942	27.5891	1.50023e-07	1.01561e-05
comp2277808_c1_seq1	-2.80136	2.02194	27.5777	1.50911e-07	1.02029e-05
comp2280178_c0_seq1	-2.55916	4.48055	27.5418	1.53739e-07	1.03807e-05
comp2192355_c0_seq1	4.58084	-1.9793	27.5302	1.54658e-07	1.04162e-05
comp2267918_c0_seq2	2.30898	3.35237	27.5288	1.54772e-07	1.04162e-05
comp2277581_c0_seq10	2.40736	3.34658	27.5276	1.54865e-07	1.04162e-05
comp2267007_c0_seq1	2.02943	5.28284	27.5227	1.55258e-07	1.04291e-05
comp2274611_c0_seq1	2.60592	2.13899	27.5182	1.55623e-07	1.04402e-05
comp2277105_c0_seq7	2.10501	4.05869	27.4963	1.57395e-07	1.05455e-05
comp2271436_c0_seq10	-4.50036	5.1701	27.4905	1.57867e-07	1.05635e-05
comp2271179_c1_seq1	-2.77963	2.41816	27.48	1.58725e-07	1.06072e-05
comp2267689_c0_seq6	-2.51067	0.90904	27.4146	1.64184e-07	1.0958e-05
comp2244623_c0_seq1	-2.66607	1.16668	27.3908	1.66217e-07	1.10795e-05
comp2274615_c2_seq13	2.44679	1.53265	27.3674	1.68246e-07	1.12004e-05
comp2269333_c0_seq9	-2.11893	2.85183	27.3171	1.72674e-07	1.14805e-05
comp2275983_c0_seq1	2.3604	5.5406	27.2829	1.75756e-07	1.16705e-05
comp2274657_c0_seq1	1.74363	4.90592	27.2296	1.80669e-07	1.19814e-05
comp2276790_c0_seq3	-2.50529	4.81982	27.2167	1.81879e-07	1.20464e-05
comp2248527_c0_seq2	2.084	6.34236	27.2054	1.82946e-07	1.21017e-05
comp2252351_c0_seq1	2.4021	-0.182714	27.2013	1.83335e-07	1.2112e-05
comp2275312_c0_seq8	-3.26118	9.55449	27.1896	1.84448e-07	1.21701e-05
comp2277656_c1_seq1	-3.0639	3.41526	27.1781	1.85544e-07	1.22269e-05
comp2248429_c0_seq1	-1.80045	3.61648	27.151	1.88164e-07	1.23806e-05
comp2273792_c0_seq1	2.66658	3.35037	27.1491	1.88353e-07	1.23806e-05
comp2264343_c0_seq3	5.64629	1.14015	27.0899	1.94205e-07	1.27492e-05
comp2279404_c0_seq1	-3.88321	0.565496	27.086	1.94604e-07	1.27593e-05
comp2278201_c1_seq1	2.4089	3.60697	27.0799	1.95213e-07	1.27831e-05
gnl|Pdu_trscr_assembly_1|5114	-2.26996	2.17986	27.0335	1.99955e-07	1.30772e-05
comp2208952_c0_seq1	-2.08527	1.89695	27.0187	2.01495e-07	1.3161e-05
comp2259858_c0_seq2	3.85806	0.659871	27.0163	2.01742e-07	1.3161e-05
comp2264883_c0_seq3	-1.61424	4.97016	27.008	2.02612e-07	1.32012e-05
comp2240069_c0_seq1	2.14642	4.09357	26.9833	2.05225e-07	1.33547e-05
comp2270401_c0_seq2	-1.69425	5.26018	26.9424	2.09607e-07	1.36229e-05
comp2263299_c0_seq2	2.69189	0.549204	26.9294	2.11026e-07	1.3698e-05
comp2277297_c1_seq4	1.86676	3.2494	26.9241	2.11606e-07	1.37186e-05
comp2252899_c0_seq1	1.80589	4.77644	26.8694	2.17681e-07	1.40948e-05
comp2255979_c1_seq1	4.25559	-1.14508	26.8476	2.20143e-07	1.42318e-05
comp2278288_c0_seq4	3.19932	2.7091	26.8459	2.20343e-07	1.42318e-05
comp2268718_c0_seq1	-3.56333	1.21254	26.8372	2.21336e-07	1.42783e-05
comp2173693_c0_seq1	7.34924	-3.41112	26.8153	2.23861e-07	1.44232e-05
comp2266433_c1_seq1	-4.27863	0.780288	26.7971	2.25974e-07	1.45414e-05
comp2234888_c0_seq2	3.12385	-0.8555	26.7863	2.27238e-07	1.46046e-05
comp2250470_c0_seq1	-1.89617	9.07178	26.7809	2.27877e-07	1.46277e-05
comp2222124_c0_seq1	-2.09064	1.42713	26.7642	2.29852e-07	1.47363e-05
comp2274562_c0_seq1	-1.74303	4.20976	26.7433	2.32354e-07	1.48784e-05
comp2268374_c0_seq2	-3.41127	0.94398	26.7148	2.35811e-07	1.50812e-05
comp2205034_c0_seq1	-3.8479	1.89726	26.6943	2.3832e-07	1.52213e-05
comp2198530_c0_seq1	2.38294	0.388159	26.6922	2.38586e-07	1.52213e-05
comp2277331_c0_seq3	2.11941	4.64424	26.6816	2.39899e-07	1.52863e-05
comp2254374_c1_seq4	2.73142	2.25842	26.6681	2.41576e-07	1.53743e-05
comp2271307_c0_seq1	2.53869	9.00735	26.6331	2.45997e-07	1.56052e-05
comp2254333_c0_seq1	-1.78292	2.77188	26.6326	2.46063e-07	1.56052e-05
comp2254382_c0_seq1	-3.23732	0.748475	26.6322	2.46104e-07	1.56052e-05
comp2272223_c0_seq1	2.4963	-0.273076	26.5812	2.52694e-07	1.60037e-05
comp2251922_c0_seq3	-3.38022	-0.0394508	26.5618	2.55237e-07	1.61451e-05
comp2268776_c0_seq3	-1.88343	3.66497	26.5138	2.61661e-07	1.65314e-05
comp2260195_c0_seq3	3.93785	-2.24534	26.5113	2.62003e-07	1.65329e-05
comp2275683_c0_seq3	1.79253	5.41369	26.4721	2.67378e-07	1.68516e-05
comp2273112_c0_seq5	-2.73157	0.973401	26.4226	2.74308e-07	1.72675e-05
comp2271273_c0_seq2	-2.24128	2.37751	26.4118	2.7585e-07	1.73265e-05
comp2258733_c0_seq1	4.25618	-0.59693	26.409	2.76243e-07	1.73265e-05
comp2276930_c1_seq2	1.69446	3.94407	26.409	2.76244e-07	1.73265e-05
comp2279235_c0_seq1	-2.23752	4.89975	26.3354	2.86984e-07	1.79785e-05
comp2216126_c0_seq1	-1.83564	2.50099	26.3195	2.89357e-07	1.81054e-05
comp2267412_c0_seq1	-3.14676	0.863279	26.2972	2.92714e-07	1.82934e-05
comp2260417_c1_seq1	-4.32663	-1.14621	26.2758	2.95972e-07	1.84749e-05
comp2270921_c0_seq6	3.09825	2.03718	26.2684	2.97104e-07	1.85233e-05
comp2279764_c0_seq1	-1.60477	5.99075	26.2542	2.993e-07	1.86379e-05
comp2244052_c0_seq1	5.75655	-2.13766	26.2486	3.00167e-07	1.86695e-05
comp2263019_c0_seq3	-1.54506	4.01962	26.2115	3.05992e-07	1.90091e-05
comp2273432_c0_seq4	2.57219	1.75072	26.2061	3.0685e-07	1.90397e-05
comp2261716_c0_seq2	-1.93785	6.90744	26.1875	3.09823e-07	1.92013e-05
comp2258854_c0_seq2	-2.51381	1.06656	26.1791	3.11177e-07	1.92623e-05
comp2268128_c0_seq11	2.02082	3.25886	26.1691	3.12796e-07	1.93177e-05
comp2276176_c0_seq4	2.77453	5.26638	26.1689	3.12815e-07	1.93177e-05
comp2277034_c1_seq4	2.18798	2.35227	26.1653	3.13404e-07	1.93312e-05
comp2259496_c0_seq1	-2.68346	0.712101	26.1577	3.14648e-07	1.93817e-05
comp2271099_c0_seq5	2.12948	0.543046	26.1557	3.14968e-07	1.93817e-05
comp2246670_c0_seq1	2.40723	5.65158	26.1513	3.15682e-07	1.94027e-05
comp2277084_c2_seq1	-3.02454	2.59165	26.1257	3.19895e-07	1.96385e-05
comp2264743_c0_seq3	-1.62709	5.78434	26.0888	3.26073e-07	1.99849e-05
comp2258113_c0_seq1	-1.72734	4.09775	26.0874	3.26305e-07	1.99849e-05
comp2273024_c0_seq1	-3.68404	1.73313	26.0266	3.36739e-07	2.05996e-05
comp1296583_c0_seq1	-8.35991	-0.22748	26.0234	3.37304e-07	2.06016e-05
comp2240833_c0_seq1	-2.82005	0.6823	26.0209	3.37749e-07	2.06016e-05
comp2270534_c0_seq1	1.97301	4.28782	26.0197	3.37958e-07	2.06016e-05
comp2268797_c0_seq2	-3.29332	1.40295	26.0037	3.40761e-07	2.07482e-05
comp2271380_c0_seq2	1.95625	2.08044	25.9784	3.45262e-07	2.09977e-05
comp2261512_c0_seq2	2.04049	4.57885	25.958	3.4892e-07	2.11954e-05
comp2253766_c0_seq10	2.59481	2.31198	25.8957	3.60375e-07	2.18451e-05
comp2277995_c0_seq1	-1.7993	7.4765	25.8953	3.60454e-07	2.18451e-05
comp2271710_c1_seq4	1.71892	6.89217	25.888	3.61818e-07	2.19022e-05
comp2252205_c0_seq1	2.31069	3.12619	25.884	3.62557e-07	2.19214e-05
gnl|Pdu_trscr_assembly_1|5866	-2.10269	1.64638	25.8679	3.65606e-07	2.20751e-05
comp2262249_c0_seq1	-1.84241	2.86755	25.8661	3.65947e-07	2.20751e-05
comp2263282_c0_seq2	2.56144	2.61831	25.8567	3.67722e-07	2.21565e-05
comp2272168_c0_seq4	-2.00984	4.35791	25.8149	3.75769e-07	2.26152e-05
comp2267778_c0_seq5	3.64141	-0.838375	25.7875	3.81146e-07	2.29123e-05
comp2246451_c0_seq1	-3.90814	-0.197141	25.7747	3.83692e-07	2.30388e-05
comp2260923_c0_seq1	-2.15287	4.22715	25.7526	3.88109e-07	2.32772e-05
comp2257348_c0_seq3	-5.36062	-0.964365	25.7231	3.94076e-07	2.36078e-05
comp2265538_c0_seq7	-3.1175	-0.0681048	25.7172	3.95292e-07	2.36535e-05
comp2265404_c0_seq3	3.13373	2.57378	25.7063	3.97525e-07	2.37598e-05
comp2267733_c0_seq1	-2.13471	8.19817	25.6917	4.00544e-07	2.39128e-05
comp2268642_c1_seq1	1.98526	2.04066	25.6877	4.01374e-07	2.39349e-05
comp2276609_c0_seq2	-1.60591	4.09591	25.671	4.04865e-07	2.40912e-05
comp2260302_c0_seq2	-2.62252	3.84578	25.6701	4.05063e-07	2.40912e-05
comp2250341_c0_seq1	-1.829	2.35558	25.6685	4.05384e-07	2.40912e-05
comp2262932_c1_seq1	-1.83512	2.26637	25.6532	4.08624e-07	2.42561e-05
comp2274390_c0_seq1	-1.66784	3.13446	25.6475	4.09826e-07	2.42933e-05
comp2253516_c0_seq4	-2.01428	11.4268	25.6458	4.10185e-07	2.42933e-05
gnl|Pdu_trscr_assembly_1|93741	-7.2172	-1.20418	25.6297	4.13631e-07	2.44696e-05
comp2259525_c0_seq2	-2.24292	2.67423	25.6195	4.1581e-07	2.45706e-05
comp2262875_c0_seq2	-2.30913	1.90602	25.6134	4.17141e-07	2.46212e-05
comp2261982_c0_seq2	-2.14822	2.07266	25.5832	4.23716e-07	2.4981e-05
comp2264063_c0_seq1	-1.64148	3.77794	25.5381	4.33744e-07	2.55433e-05
comp2234125_c0_seq2	-7.96081	-1.38816	25.5209	4.37608e-07	2.57417e-05
comp2237365_c0_seq1	4.06041	-1.47843	25.5152	4.38908e-07	2.57891e-05
comp2245998_c0_seq3	-2.60073	1.17151	25.4132	4.62734e-07	2.71584e-05
comp2276143_c0_seq2	-3.61516	3.13815	25.4025	4.65318e-07	2.72792e-05
comp2265599_c0_seq1	2.42101	2.5265	25.3909	4.68124e-07	2.74129e-05
comp2232518_c0_seq1	2.48069	2.95113	25.3822	4.70245e-07	2.75062e-05
comp2255195_c0_seq2	2.18279	-0.201211	25.355	4.7691e-07	2.78647e-05
comp2270286_c0_seq1	-2.72372	2.75744	25.347	4.78895e-07	2.79493e-05
comp2245811_c0_seq1	-1.89657	5.60973	25.311	4.87922e-07	2.84443e-05
comp2273174_c1_seq4	-3.30776	2.02795	25.3029	4.8998e-07	2.8505e-05
comp1986706_c0_seq1	-2.90388	0.349424	25.3009	4.90479e-07	2.8505e-05
comp2267858_c0_seq2	2.43828	4.4062	25.3004	4.90607e-07	2.8505e-05
comp2239524_c0_seq2	2.79988	-0.492461	25.2901	4.93246e-07	2.86264e-05
comp2275557_c0_seq2	3.5276	0.999952	25.2666	4.99279e-07	2.89443e-05
comp2265615_c0_seq3	3.21316	3.14778	25.25	5.03584e-07	2.91614e-05
comp2276258_c0_seq2	-1.6017	7.12998	25.2399	5.06233e-07	2.92822e-05
comp2279767_c0_seq1	1.70283	3.18028	25.2114	5.13768e-07	2.9685e-05
comp2263896_c0_seq3	2.01655	4.69396	25.2044	5.15642e-07	2.97603e-05
comp2265580_c1_seq5	-2.2084	2.15048	25.1701	5.24908e-07	3.02615e-05
comp2265967_c0_seq1	-2.64711	1.58211	25.1608	5.27437e-07	3.03737e-05
comp2273614_c0_seq1	3.29849	-0.0357248	25.1558	5.28805e-07	3.04189e-05
comp2267248_c1_seq1	-2.19456	1.67397	25.1534	5.29451e-07	3.04224e-05
comp2245798_c0_seq1	4.00613	-1.36382	25.1069	5.42394e-07	3.11317e-05
comp2276985_c1_seq1	-1.96514	3.54819	25.1043	5.43113e-07	3.11387e-05
comp2257880_c0_seq2	1.98635	3.51871	25.0958	5.45523e-07	3.12424e-05
comp2257799_c0_seq1	2.55628	1.70863	25.0915	5.46727e-07	3.1277e-05
comp2223620_c0_seq1	3.57638	0.510408	25.0837	5.4896e-07	3.13702e-05
comp2271066_c0_seq4	-1.96428	1.93051	25.0075	5.71068e-07	3.25978e-05
comp2256287_c0_seq1	2.6778	3.4025	25.0045	5.71965e-07	3.26133e-05
comp2237345_c0_seq1	-2.32437	1.55785	24.9785	5.79731e-07	3.30199e-05
comp2260463_c0_seq3	-2.76329	1.36568	24.9673	5.83113e-07	3.31762e-05
comp2245391_c0_seq1	-2.24576	2.47519	24.9562	5.86464e-07	3.33305e-05
comp2264812_c0_seq2	-3.87001	-0.886148	24.9447	5.89988e-07	3.34942e-05
comp2243988_c0_seq1	-2.11699	2.52432	24.924	5.96347e-07	3.38006e-05
comp2264469_c0_seq6	-3.58943	0.836475	24.9221	5.96936e-07	3.38006e-05
comp2251024_c0_seq1	-2.54927	4.11085	24.9208	5.97333e-07	3.38006e-05
comp2270444_c1_seq4	-1.7403	3.76723	24.8995	6.03969e-07	3.4139e-05
comp2276626_c0_seq1	2.07862	3.33991	24.8829	6.09194e-07	3.4397e-05
comp2275101_c0_seq4	2.20975	4.23019	24.8785	6.10587e-07	3.44383e-05
comp2271348_c0_seq1	-1.4447	6.39662	24.848	6.20344e-07	3.49508e-05
comp2114676_c0_seq2	2.97584	0.493128	24.8138	6.31453e-07	3.55382e-05
comp2277760_c0_seq2	1.73298	2.63135	24.8074	6.33522e-07	3.56161e-05
comp2268336_c0_seq2	-1.96157	4.54859	24.8037	6.34746e-07	3.56464e-05
comp2274067_c2_seq2	2.66026	2.93914	24.7841	6.41243e-07	3.59725e-05
gnl|Pdu_trscr_assembly_1|17237	1.57978	5.80958	24.7756	6.44083e-07	3.60929e-05
comp2277739_c0_seq12	2.64299	5.71373	24.7678	6.46672e-07	3.61991e-05
comp2261136_c0_seq5	-5.23418	-0.863141	24.7615	6.48816e-07	3.628e-05
comp2254515_c0_seq1	3.10641	1.78339	24.7489	6.53052e-07	3.64777e-05
comp2199259_c0_seq2	-1.90549	2.1292	24.7386	6.56562e-07	3.6611e-05
comp2242540_c0_seq1	-3.53608	-0.785138	24.7378	6.56845e-07	3.6611e-05
comp2265639_c0_seq3	-2.51633	0.819229	24.7234	6.61757e-07	3.68454e-05
comp2271554_c0_seq2	2.67887	1.53854	24.7133	6.65234e-07	3.69786e-05
comp2266781_c0_seq2	-3.06742	2.62809	24.7123	6.65571e-07	3.69786e-05
comp2270975_c1_seq8	-2.52251	3.13269	24.6999	6.69879e-07	3.71783e-05
comp2276910_c0_seq34	1.83011	6.7934	24.6675	6.8123e-07	3.7768e-05
comp2254630_c0_seq2	2.46299	6.90891	24.6617	6.83297e-07	3.77918e-05
comp2273269_c0_seq6	-2.16485	1.06157	24.6616	6.83321e-07	3.77918e-05
comp2277538_c0_seq1	-2.58874	0.989501	24.6601	6.83837e-07	3.77918e-05
comp2267190_c1_seq5	-2.65691	1.92557	24.6148	7.00127e-07	3.8651e-05
comp2273758_c1_seq1	2.95993	3.88555	24.5991	7.05847e-07	3.89255e-05
comp2263060_c0_seq1	3.4143	-0.790288	24.5944	7.07577e-07	3.89796e-05
comp2276389_c0_seq2	-1.67432	4.73998	24.5888	7.09635e-07	3.90517e-05
comp2278511_c0_seq9	1.94241	6.75769	24.564	7.18831e-07	3.9516e-05
comp2276970_c1_seq7	-1.68307	4.55337	24.5617	7.19675e-07	3.95206e-05
comp1200167_c0_seq1	-1.87845	3.66561	24.5595	7.20501e-07	3.95243e-05
comp2275258_c0_seq6	-1.64609	6.00561	24.5524	7.23148e-07	3.96278e-05
comp2257683_c0_seq2	2.63017	0.828879	24.5372	7.28892e-07	3.98594e-05
comp2275871_c0_seq1	1.5286	3.02837	24.5372	7.28906e-07	3.98594e-05
comp2258034_c0_seq4	3.12937	1.67788	24.525	7.33509e-07	4.0069e-05
gnl|Pdu_trscr_assembly_1|20826	-2.44101	1.76454	24.4717	7.54085e-07	4.11066e-05
comp2269790_c0_seq1	-1.82945	3.08814	24.4711	7.54331e-07	4.11066e-05
comp2247067_c0_seq1	-7.13759	-1.64724	24.4697	7.54873e-07	4.11066e-05
comp2264138_c0_seq2	-1.82797	3.42626	24.4668	7.55996e-07	4.11248e-05
comp2268417_c0_seq2	-2.53874	6.43334	24.4623	7.57775e-07	4.11785e-05
comp2224449_c0_seq1	2.50377	0.591276	24.4566	7.60043e-07	4.12587e-05
comp2277723_c0_seq7	-2.67429	3.35968	24.4365	7.68012e-07	4.16479e-05
comp2268156_c1_seq2	3.0089	0.484931	24.4142	7.76948e-07	4.20886e-05
comp2271886_c0_seq1	-3.04062	0.255774	24.3686	7.95532e-07	4.30505e-05
comp2266869_c0_seq1	-2.37431	3.9903	24.3628	7.97932e-07	4.31355e-05
comp2262305_c0_seq1	-1.67077	7.12029	24.3535	8.01807e-07	4.33001e-05
comp2271779_c0_seq1	-2.63326	0.18221	24.3482	8.04025e-07	4.33749e-05
comp2200386_c0_seq5	2.08111	4.17129	24.342	8.06603e-07	4.34689e-05
comp2268946_c0_seq1	-2.80546	2.02555	24.3387	8.08006e-07	4.34995e-05
comp2270954_c0_seq2	-2.13173	3.32307	24.3296	8.11839e-07	4.36491e-05
comp2273523_c0_seq3	2.4239	4.77824	24.3281	8.12463e-07	4.36491e-05
comp2258671_c0_seq2	2.55195	2.08732	24.3016	8.23719e-07	4.41712e-05
comp2251242_c0_seq2	3.87916	-1.58635	24.3012	8.23877e-07	4.41712e-05
comp2071630_c0_seq1	3.92549	-2.21351	24.2854	8.3066e-07	4.4489e-05
comp2278219_c1_seq2	1.93971	6.86195	24.2629	8.4043e-07	4.4966e-05
comp2257292_c2_seq1	-2.60423	0.709474	24.2593	8.42014e-07	4.50045e-05
comp2265181_c0_seq1	-1.9624	5.60711	24.2389	8.50939e-07	4.54349e-05
comp2274272_c0_seq1	2.51172	2.60893	24.2259	8.56713e-07	4.56963e-05
comp2271818_c0_seq1	2.35769	2.98857	24.2075	8.64926e-07	4.60872e-05
comp2274464_c1_seq2	-2.68214	1.9131	24.1942	8.70936e-07	4.62759e-05
comp2259975_c0_seq2	2.3653	3.19117	24.1926	8.71659e-07	4.62759e-05
comp2265205_c2_seq7	-3.17509	1.28394	24.1896	8.73004e-07	4.62759e-05
comp2274017_c0_seq3	-1.9599	4.06937	24.1882	8.73639e-07	4.62759e-05
comp2274822_c1_seq1	1.91964	5.34647	24.1881	8.73703e-07	4.62759e-05
comp2142776_c0_seq1	-2.82954	0.31085	24.1879	8.73801e-07	4.62759e-05
comp2245323_c1_seq1	2.33801	2.57154	24.1686	8.82614e-07	4.66951e-05
comp2258798_c0_seq1	2.56069	0.131341	24.16	8.86531e-07	4.68547e-05
gnl|Pdu_trscr_assembly_1|91767	-1.69715	2.93298	24.1551	8.88827e-07	4.69284e-05
comp2262932_c0_seq1	-2.27692	1.50575	24.1168	9.06661e-07	4.78216e-05
comp2265991_c0_seq1	2.37061	3.56989	24.099	9.15085e-07	4.8217e-05
comp2271110_c0_seq3	-1.65146	2.7521	24.0818	9.23295e-07	4.86004e-05
comp2239613_c0_seq2	-2.93399	2.51091	24.0626	9.32542e-07	4.90376e-05
comp2241111_c0_seq1	2.36616	-0.440986	24.0589	9.34329e-07	4.90819e-05
comp2200430_c0_seq3	-1.81696	3.0783	24.0546	9.36411e-07	4.91418e-05
comp2138942_c0_seq1	-2.18022	2.51654	24.0409	9.43126e-07	4.94443e-05
comp2269659_c0_seq1	1.92719	3.23897	24.0262	9.5034e-07	4.97724e-05
comp2267914_c1_seq2	2.35267	4.09975	24.0026	9.62053e-07	5.02725e-05
comp2138260_c0_seq2	-3.56932	-0.144141	24.0013	9.6271e-07	5.02725e-05
comp2216905_c0_seq1	-2.04403	1.4631	24.0009	9.6289e-07	5.02725e-05
comp2277298_c0_seq4	1.90498	5.17051	23.9992	9.63752e-07	5.02725e-05
comp2262410_c0_seq1	-2.10964	3.02013	23.9945	9.66114e-07	5.03453e-05
comp2253859_c0_seq1	-2.20993	1.34544	23.8775	1.02667e-06	5.34474e-05
gnl|Pdu_trscr_assembly_1|10869	1.74645	6.087	23.8674	1.03203e-06	5.36728e-05
comp2261825_c0_seq1	1.80972	2.66506	23.8353	1.04938e-06	5.45207e-05
comp2263356_c0_seq1	3.36541	2.49641	23.8294	1.05264e-06	5.46353e-05
comp2271093_c0_seq1	1.63013	5.82528	23.8134	1.06141e-06	5.50356e-05
comp2272502_c0_seq1	2.20069	5.48789	23.7946	1.07185e-06	5.54594e-05
comp2140981_c0_seq1	-2.46782	3.29412	23.7942	1.07207e-06	5.54594e-05
gnl|Pdu_trscr_assembly_1|10787	1.99907	2.40059	23.7929	1.07278e-06	5.54594e-05
comp1901146_c0_seq1	3.63173	-1.00997	23.7847	1.07735e-06	5.55597e-05
comp2201594_c0_seq1	2.43185	1.01466	23.7845	1.07744e-06	5.55597e-05
comp2207922_c0_seq1	2.87248	-0.327323	23.7837	1.07792e-06	5.55597e-05
comp2270119_c0_seq15	-2.23005	5.05787	23.7764	1.08202e-06	5.57162e-05
comp2262438_c0_seq2	1.88855	2.64734	23.7615	1.09041e-06	5.60497e-05
comp2240696_c0_seq1	-2.54492	0.767703	23.7611	1.09065e-06	5.60497e-05
comp2255158_c0_seq2	-3.30512	0.158543	23.7439	1.10045e-06	5.64973e-05
comp2207487_c0_seq1	-1.75748	1.98868	23.7186	1.11501e-06	5.71885e-05
comp2276867_c0_seq11	2.02778	4.3587	23.7072	1.12165e-06	5.74724e-05
comp2272523_c0_seq2	-1.73497	2.46028	23.6932	1.12979e-06	5.78325e-05
comp2257509_c0_seq1	-2.1275	1.49355	23.6844	1.13498e-06	5.80414e-05
comp2256318_c0_seq1	-2.98828	2.13001	23.6738	1.14125e-06	5.83047e-05
comp2277947_c0_seq1	1.84469	4.9817	23.6654	1.14627e-06	5.85035e-05
comp2277231_c1_seq4	1.84063	3.98543	23.6552	1.15235e-06	5.87561e-05
comp2267093_c0_seq3	-2.55686	0.52412	23.6491	1.15601e-06	5.88851e-05
comp2217620_c0_seq2	3.95103	0.355674	23.6325	1.16603e-06	5.93376e-05
comp2272458_c0_seq6	-3.53156	1.43733	23.5852	1.19505e-06	6.0755e-05
comp2251051_c0_seq1	-2.40405	0.621038	23.5649	1.20771e-06	6.13386e-05
comp1981288_c0_seq1	-1.62423	3.16252	23.5594	1.21114e-06	6.14529e-05
comp2271231_c0_seq3	2.07307	4.64793	23.5379	1.22479e-06	6.20644e-05
comp2267067_c0_seq8	-1.79778	4.97656	23.5366	1.22557e-06	6.20644e-05
comp2239883_c0_seq1	-4.23845	-0.519587	23.5313	1.22897e-06	6.21757e-05
gnl|Pdu_trscr_assembly_1|7104	-1.69669	3.00793	23.5093	1.24314e-06	6.28316e-05
comp2271994_c0_seq2	-2.08811	12.3311	23.5039	1.24664e-06	6.29473e-05
comp1193815_c0_seq1	4.45077	-1.45012	23.5004	1.24889e-06	6.3e-05
comp2234664_c1_seq2	-1.71688	3.47959	23.4813	1.26136e-06	6.35675e-05
comp2253329_c0_seq1	-2.71957	2.34426	23.4727	1.26697e-06	6.37885e-05
comp2279013_c0_seq1	-2.08599	3.83952	23.4688	1.26957e-06	6.38281e-05
comp2276798_c2_seq4	1.78751	5.00286	23.4678	1.27021e-06	6.38281e-05
comp2267270_c0_seq1	2.20936	0.739274	23.4599	1.27545e-06	6.40294e-05
comp2259382_c0_seq2	-2.01373	3.71338	23.4571	1.2773e-06	6.4044e-05
comp2271189_c0_seq4	2.41277	1.35615	23.4558	1.2782e-06	6.4044e-05
comp2269738_c0_seq1	1.80126	6.99161	23.4526	1.28031e-06	6.40882e-05
comp2260578_c1_seq1	3.61456	-1.75061	23.4471	1.28395e-06	6.42087e-05
comp2261373_c0_seq1	-1.60015	9.39823	23.4432	1.28656e-06	6.42775e-05
comp2244199_c0_seq1	-1.83854	3.52187	23.4147	1.30574e-06	6.51732e-05
comp2274177_c0_seq1	-2.22701	5.88149	23.4062	1.31157e-06	6.54012e-05
comp2257649_c0_seq1	-3.17794	3.89553	23.3741	1.33362e-06	6.6437e-05
comp2277034_c0_seq10	1.85686	3.37898	23.3479	1.35193e-06	6.72764e-05
comp2269865_c0_seq6	1.59879	5.36333	23.3463	1.35305e-06	6.72764e-05
comp2206043_c0_seq1	-4.74723	-1.00606	23.3366	1.35989e-06	6.75519e-05
comp2234451_c0_seq4	3.70015	1.37736	23.3222	1.37009e-06	6.79939e-05
comp2277160_c2_seq1	2.06718	4.30679	23.3141	1.37588e-06	6.82162e-05
comp2258702_c0_seq6	-2.91222	-0.338677	23.3067	1.38119e-06	6.83923e-05
comp2236094_c1_seq1	-4.27144	1.0614	23.3055	1.38206e-06	6.83923e-05
comp2265240_c0_seq3	-2.41874	1.5682	23.3036	1.38339e-06	6.83931e-05
comp2272792_c0_seq1	-2.14952	5.1924	23.2989	1.3868e-06	6.84964e-05
comp2254586_c0_seq1	-2.27513	7.04725	23.2877	1.39493e-06	6.88327e-05
comp2268065_c0_seq1	2.48499	0.994569	23.2761	1.40333e-06	6.91815e-05
comp2254617_c0_seq2	1.83978	2.63779	23.2481	1.42394e-06	7.01315e-05
comp2267437_c1_seq1	-1.83021	5.25709	23.2438	1.42711e-06	7.02212e-05
comp2257556_c0_seq4	-2.43589	2.99086	23.2236	1.44218e-06	7.08954e-05
comp2258543_c0_seq1	1.76622	4.70633	23.2057	1.45563e-06	7.14894e-05
comp2256930_c1_seq1	-2.42462	1.12019	23.2036	1.45722e-06	7.14998e-05
comp2273892_c2_seq3	2.01505	4.6897	23.1888	1.46851e-06	7.19859e-05
comp2249798_c1_seq1	2.31032	1.58797	23.1776	1.4771e-06	7.23392e-05
comp2065624_c0_seq3	-3.56623	4.32153	23.1578	1.49238e-06	7.29896e-05
comp2254294_c0_seq1	2.34094	2.24665	23.1567	1.49319e-06	7.29896e-05
comp2272909_c0_seq4	-2.95144	1.23445	23.0693	1.56263e-06	7.62448e-05
comp2252365_c0_seq1	3.21725	0.365237	23.0692	1.56271e-06	7.62448e-05
comp2243381_c1_seq2	6.14228	-1.85811	23.0664	1.56499e-06	7.62846e-05
comp2267074_c0_seq1	-2.16261	2.70382	23.0407	1.5861e-06	7.72066e-05
comp2235330_c0_seq1	3.20368	-1.68851	23.0397	1.58687e-06	7.72066e-05
comp2275131_c0_seq6	1.77063	3.74512	23.0352	1.59063e-06	7.72386e-05
comp2275031_c0_seq1	-3.8755	0.552231	23.0346	1.59115e-06	7.72386e-05
comp2266367_c0_seq1	-3.78349	-0.622762	23.0336	1.59198e-06	7.72386e-05
comp2260291_c0_seq1	-2.60906	6.94211	23.0191	1.60401e-06	7.77497e-05
comp1194364_c0_seq1	-2.32262	5.56024	23.005	1.61577e-06	7.82467e-05
comp2271755_c0_seq2	2.88687	6.44252	23.0003	1.61973e-06	7.83591e-05
comp2274834_c1_seq1	2.80121	-0.911711	22.9962	1.6232e-06	7.83591e-05
comp2240678_c0_seq1	4.24058	-1.21382	22.9962	1.62323e-06	7.83591e-05
comp2264460_c0_seq3	-2.96301	0.551667	22.9951	1.62411e-06	7.83591e-05
comp2275684_c1_seq2	-1.8051	3.83343	22.9896	1.62876e-06	7.85109e-05
comp2234049_c0_seq2	-2.24105	0.848704	22.9742	1.64187e-06	7.90693e-05
comp2105772_c0_seq1	2.32142	2.97505	22.9638	1.65081e-06	7.94263e-05
comp2252790_c0_seq1	-2.82644	7.0575	22.92	1.68889e-06	8.11838e-05
comp2277818_c0_seq4	2.04721	4.65481	22.912	1.69592e-06	8.14463e-05
comp2268894_c0_seq4	-3.26523	4.03942	22.899	1.70743e-06	8.19238e-05
comp2246233_c0_seq2	-1.97979	4.11617	22.8864	1.71862e-06	8.23844e-05
comp2258892_c0_seq1	-1.9659	3.40508	22.875	1.72889e-06	8.28007e-05
comp2278398_c1_seq3	-3.0672	0.755944	22.8716	1.73191e-06	8.2869e-05
comp2264505_c0_seq2	-2.79228	1.1153	22.8628	1.73987e-06	8.3124e-05
comp2229342_c0_seq1	3.02003	-1.5936	22.8622	1.74043e-06	8.3124e-05
comp2266336_c1_seq2	2.21274	2.17437	22.8584	1.74388e-06	8.32123e-05
comp2258250_c0_seq1	-3.31005	0.686912	22.8551	1.74681e-06	8.32252e-05
comp2268950_c0_seq1	-2.57068	0.108153	22.8546	1.74735e-06	8.32252e-05
comp2143340_c0_seq1	-1.82995	4.32398	22.8199	1.77917e-06	8.46635e-05
gnl|Pdu_trscr_assembly_1|15716	-2.7041	0.372329	22.8102	1.78817e-06	8.50138e-05
comp2274588_c0_seq5	1.43388	6.11568	22.7942	1.80308e-06	8.56445e-05
comp2253327_c0_seq1	2.17245	-0.12974	22.7912	1.80591e-06	8.56694e-05
comp2249204_c0_seq1	-2.28181	2.27554	22.7893	1.80772e-06	8.56694e-05
comp2248445_c0_seq1	-2.03363	1.05514	22.7884	1.80854e-06	8.56694e-05
comp2276171_c4_seq1	-1.88648	3.69469	22.7862	1.81061e-06	8.56896e-05
comp2269401_c0_seq1	1.61984	4.42776	22.7765	1.81973e-06	8.60432e-05
comp2272495_c0_seq1	1.56072	6.61761	22.7718	1.82419e-06	8.61755e-05
comp2256174_c0_seq1	2.57147	0.272759	22.7681	1.82776e-06	8.62659e-05
comp2141175_c0_seq1	-1.93892	2.50231	22.7459	1.84902e-06	8.71105e-05
comp2275291_c1_seq1	-2.15354	3.40496	22.7457	1.84915e-06	8.71105e-05
comp2260998_c0_seq3	2.45122	0.806462	22.7441	1.85067e-06	8.71105e-05
comp2267475_c0_seq6	1.65799	5.84046	22.6997	1.89396e-06	8.90676e-05
comp2263558_c3_seq9	2.01261	5.34321	22.6927	1.90087e-06	8.93115e-05
comp2256304_c0_seq1	-2.86923	0.945555	22.6851	1.90839e-06	8.95842e-05
comp2274272_c1_seq1	2.65295	4.00858	22.678	1.91549e-06	8.97721e-05
comp2266783_c1_seq1	2.17364	1.78416	22.6776	1.91584e-06	8.97721e-05
comp2266986_c0_seq3	-3.81508	2.90894	22.6716	1.92189e-06	8.99743e-05
comp2270443_c0_seq7	-2.39271	2.66591	22.6544	1.93915e-06	9.07011e-05
comp2273755_c0_seq2	2.4042	3.23886	22.5934	2.00174e-06	9.35443e-05
comp2261446_c0_seq1	-2.05608	1.56463	22.5584	2.03854e-06	9.5179e-05
comp2246287_c0_seq3	2.10856	0.813378	22.5564	2.04065e-06	9.5192e-05
comp2258014_c0_seq1	-1.58041	6.51269	22.5467	2.05093e-06	9.55226e-05
comp1194411_c0_seq1	-2.23891	2.99813	22.5456	2.05211e-06	9.55226e-05
comp2221239_c0_seq1	-2.91164	1.77793	22.5446	2.05324e-06	9.55226e-05
comp2265541_c0_seq1	2.94485	-0.073196	22.527	2.07215e-06	9.6316e-05
comp2240770_c0_seq3	-3.9179	-0.238644	22.4994	2.10207e-06	9.76198e-05
comp2242569_c0_seq3	-8.19835	0.25429	22.4943	2.1077e-06	9.77939e-05
comp2263903_c0_seq1	2.23241	1.4059	22.4752	2.12871e-06	9.86807e-05
comp2259267_c1_seq1	3.44324	0.336156	22.4507	2.15607e-06	9.98603e-05
gnl|Pdu_trscr_assembly_1|9255	-2.55568	1.11218	22.4484	2.1587e-06	9.98885e-05
comp2263803_c0_seq1	-2.6548	6.01088	22.4458	2.16155e-06	9.98885e-05
gnl|Pdu_trscr_assembly_1|1345	2.14106	5.65034	22.445	2.16244e-06	9.98885e-05
comp2266254_c0_seq1	-2.5848	3.52802	22.4341	2.17477e-06	0.000100369
comp2258124_c0_seq1	5.46115	-1.98617	22.407	2.20569e-06	0.000101706
comp2263011_c0_seq1	2.15309	6.78343	22.3698	2.24878e-06	0.000103601
comp2273438_c0_seq5	1.81349	4.86725	22.3627	2.25713e-06	0.000103894
comp2266758_c1_seq1	-2.19253	5.53822	22.353	2.26853e-06	0.000104326
comp2263879_c0_seq1	-2.91739	-0.0922519	22.3346	2.29038e-06	0.000105238
comp2273484_c0_seq3	-1.65319	3.67587	22.3268	2.29975e-06	0.000105575
comp2263079_c1_seq1	2.35896	1.09856	22.3169	2.31162e-06	0.000106027
comp2274409_c0_seq2	-3.25664	2.79887	22.2838	2.35183e-06	0.000107776
comp2252019_c0_seq1	-2.06072	2.15793	22.2803	2.35606e-06	0.000107875
comp2253126_c0_seq1	2.29639	2.29676	22.2704	2.36825e-06	0.000108338
comp2248859_c2_seq1	-3.13107	0.444787	22.2662	2.37353e-06	0.000108484
comp2194038_c0_seq1	5.9074	-2.19434	22.2628	2.37774e-06	0.000108581
comp2277878_c2_seq6	-1.47377	3.69966	22.2565	2.3855e-06	0.00010884
comp2269758_c0_seq1	-1.89536	2.8996	22.2476	2.39661e-06	0.000109252
comp2140636_c0_seq1	-1.62472	2.96593	22.2355	2.41169e-06	0.000109843
comp2263543_c0_seq5	2.31148	2.42011	22.2272	2.42222e-06	0.000110226
comp2260027_c0_seq1	2.16712	2.5119	22.2198	2.4316e-06	0.000110467
comp2263096_c0_seq1	1.61892	4.86112	22.2196	2.43176e-06	0.000110467
comp2259570_c0_seq1	-2.09765	2.63682	22.2151	2.43752e-06	0.000110611
comp2264585_c0_seq1	2.09077	0.102047	22.2138	2.43919e-06	0.000110611
comp2262558_c0_seq2	1.76591	1.7514	22.211	2.44267e-06	0.000110673
comp2267788_c0_seq5	1.62596	6.1586	22.1834	2.47805e-06	0.000112171
comp2274942_c1_seq1	-1.26668	5.88762	22.1816	2.4804e-06	0.000112171
comp1194190_c0_seq1	-1.65618	2.60845	22.1802	2.48219e-06	0.000112171
comp2275894_c0_seq1	1.62934	3.85126	22.1676	2.49849e-06	0.000112809
comp2140683_c0_seq1	-2.70644	4.36032	22.1587	2.51016e-06	0.000113238
comp2276199_c1_seq1	2.29086	0.175603	22.1556	2.51422e-06	0.000113323
comp2256469_c0_seq1	-3.57814	-0.162278	22.136	2.54007e-06	0.000114376
comp2226744_c0_seq1	3.57423	-1.50445	22.1345	2.54199e-06	0.000114376
comp1975994_c0_seq1	1.71679	4.60218	22.1161	2.56643e-06	0.000115376
comp2269929_c1_seq2	1.63746	4.01099	22.1115	2.57267e-06	0.000115557
comp2269767_c0_seq1	-1.91564	2.43566	22.107	2.57874e-06	0.00011573
comp2251129_c0_seq1	2.08613	2.12787	22.0942	2.59588e-06	0.000116399
comp2198075_c0_seq1	2.40313	0.425824	22.0863	2.60662e-06	0.00011678
comp2244297_c0_seq1	4.96474	0.318075	22.0738	2.62372e-06	0.000117445
comp2254594_c0_seq1	-2.12085	1.35189	22.039	2.67161e-06	0.00011939
comp2253748_c0_seq2	2.07782	1.71825	22.036	2.67585e-06	0.00011939
comp2251286_c0_seq6	2.47945	1.27202	22.0357	2.6763e-06	0.00011939
comp2266388_c0_seq2	-1.43691	4.2269	22.0356	2.67634e-06	0.00011939
comp2252595_c0_seq1	5.54868	-1.69901	22.0158	2.70414e-06	0.000120527
comp2274193_c0_seq5	1.48887	5.46404	22.0123	2.70906e-06	0.000120642
comp2234777_c0_seq2	3.87369	-0.650671	22.0025	2.72301e-06	0.00012116
gnl|Pdu_trscr_assembly_1|22197	-1.74029	2.88376	21.9959	2.73233e-06	0.000121471
comp2266735_c0_seq5	-2.04464	3.09679	21.9937	2.7355e-06	0.000121508
comp2263951_c0_seq2	-1.963	1.90141	21.9552	2.79091e-06	0.000123864
comp2254208_c0_seq1	-1.86202	2.20715	21.9461	2.8041e-06	0.000124343
comp2252040_c0_seq1	-2.60519	1.2544	21.9323	2.82442e-06	0.000125137
comp2273099_c0_seq3	1.99322	5.03071	21.912	2.85436e-06	0.000126276
comp2254976_c0_seq2	3.41552	0.273522	21.9116	2.85496e-06	0.000126276
comp2239542_c0_seq1	-4.24133	-1.24413	21.8949	2.87991e-06	0.000127271
comp2278422_c0_seq1	2.49269	6.58351	21.8764	2.90793e-06	0.0001284
comp2224883_c0_seq1	2.3353	2.57981	21.8736	2.9121e-06	0.000128475
comp2272214_c0_seq3	-1.64362	3.19772	21.8411	2.96194e-06	0.000130564
comp2276838_c1_seq1	-1.35786	5.48347	21.8273	2.98325e-06	0.000131392
comp2256945_c0_seq3	3.50587	-1.01423	21.8221	2.99139e-06	0.00013154
comp2273940_c0_seq7	1.86983	1.91921	21.8219	2.99168e-06	0.00013154
comp2264313_c1_seq14	-3.43391	-0.515606	21.7954	3.03331e-06	0.000133258
comp2238628_c0_seq1	4.22842	-1.68156	21.7904	3.04113e-06	0.000133489
comp2277602_c1_seq2	1.87208	4.88425	21.7495	3.10668e-06	0.000136251
comp2267288_c1_seq6	2.42736	0.483169	21.7419	3.11909e-06	0.000136681
comp2279856_c0_seq1	-2.72833	1.42383	21.7172	3.15949e-06	0.000138335
comp2269506_c0_seq28	1.73642	5.10895	21.7007	3.18677e-06	0.000139412
comp2261362_c0_seq2	-2.25411	4.89245	21.6894	3.20558e-06	0.000140117
gnl|Pdu_trscr_assembly_1|13513	1.63208	4.24877	21.6707	3.23699e-06	0.000141371
comp2237456_c0_seq1	-2.08898	1.42064	21.6567	3.26065e-06	0.000142285
comp2273340_c1_seq1	-1.61721	4.23995	21.6457	3.27947e-06	0.000142987
comp2258573_c0_seq1	2.60807	-0.882183	21.6174	3.32825e-06	0.000144992
comp2270994_c0_seq16	1.68384	5.94235	21.6151	3.33211e-06	0.000145039
comp2249062_c0_seq1	-1.79299	5.23627	21.5912	3.374e-06	0.000146739
comp2276559_c0_seq10	1.50554	5.39419	21.5893	3.37732e-06	0.000146761
comp1194290_c0_seq1	-2.73628	4.73292	21.556	3.43652e-06	0.000149209
comp2271921_c1_seq4	3.2023	0.690349	21.5537	3.44057e-06	0.00014926
comp2277360_c0_seq2	-1.45031	4.58218	21.5195	3.50247e-06	0.00015182
comp2233700_c0_seq1	-2.352	1.4156	21.5178	3.50555e-06	0.000151826
comp2213506_c0_seq1	-2.07774	2.90297	21.5101	3.51965e-06	0.00015231
comp2269637_c0_seq4	-3.18609	1.33193	21.5038	3.53125e-06	0.000152685
comp2264985_c0_seq2	-2.36568	1.09232	21.4914	3.55411e-06	0.00015347
comp2276661_c0_seq2	-1.87841	5.21285	21.4908	3.55528e-06	0.00015347
comp2263577_c0_seq1	-1.65379	4.19682	21.4854	3.56537e-06	0.000153778
comp2265988_c1_seq1	-3.28716	0.503346	21.4455	3.64026e-06	0.000156814
comp2261692_c0_seq2	2.13099	2.91977	21.4447	3.6418e-06	0.000156814
comp2253231_c0_seq1	-3.43204	-0.119773	21.4358	3.65882e-06	0.000157417
comp2242039_c0_seq2	-4.47722	0.0945388	21.4288	3.67208e-06	0.000157857
comp2276298_c0_seq2	-1.65112	2.79705	21.4	3.72762e-06	0.000160112
comp2261186_c1_seq4	-1.91823	1.48015	21.392	3.7433e-06	0.000160653
comp2276461_c0_seq7	-2.04425	3.89542	21.3878	3.7516e-06	0.000160877
comp2226307_c0_seq1	-2.52145	0.607682	21.3745	3.77766e-06	0.000161861
comp2260663_c0_seq1	2.60447	3.31204	21.3687	3.78912e-06	0.000162218
comp2195144_c0_seq1	2.08198	0.72414	21.3631	3.80014e-06	0.000162557
comp2229746_c0_seq2	-1.77065	2.40705	21.3404	3.84533e-06	0.000164355
comp2262167_c0_seq1	-3.68537	2.22096	21.337	3.85216e-06	0.000164396
comp2266705_c0_seq2	2.65084	0.544415	21.3368	3.8526e-06	0.000164396
comp2138264_c0_seq1	-2.42188	2.7355	21.3328	3.86078e-06	0.00016461
comp2246102_c0_seq1	-3.06759	1.37579	21.3295	3.86737e-06	0.000164756
comp1879972_c0_seq1	2.14314	2.07859	21.327	3.87231e-06	0.000164831
comp2276437_c1_seq1	-1.88073	3.66706	21.3232	3.87999e-06	0.000165023
comp2256808_c0_seq1	-1.64316	3.38286	21.3178	3.89102e-06	0.000165357
comp2254542_c0_seq1	-3.38918	5.21993	21.3031	3.92106e-06	0.000166498
comp2256140_c0_seq1	-1.95699	1.68457	21.2999	3.9276e-06	0.00016664
gnl|Pdu_trscr_assembly_1|12794	-1.50512	8.426	21.2881	3.95175e-06	0.000167528
comp2262870_c2_seq4	-2.40851	1.29941	21.2805	3.96753e-06	0.00016806
comp2264734_c0_seq1	-2.03465	1.45301	21.2761	3.97669e-06	0.000168311
comp2270709_c0_seq3	1.52317	5.06054	21.2711	3.98693e-06	0.000168607
comp2257618_c0_seq4	-3.17269	0.557203	21.2679	3.99372e-06	0.000168757
comp2154653_c0_seq1	3.36056	-1.72555	21.2582	4.01398e-06	0.000169476
comp2242282_c0_seq1	-1.5696	8.8954	21.2483	4.03478e-06	0.000170216
comp2272091_c0_seq2	-1.81575	3.98223	21.2404	4.05125e-06	0.000170773
comp2115354_c1_seq1	-2.72985	1.75396	21.2282	4.07729e-06	0.000171731
comp2241874_c0_seq1	2.24255	1.84811	21.203	4.13117e-06	0.00017386
comp2270353_c0_seq3	-1.71391	4.71646	21.1967	4.14484e-06	0.000174294
comp2271737_c1_seq2	-2.22091	5.52279	21.1927	4.15333e-06	0.00017451
comp2267410_c0_seq2	-2.68949	0.462608	21.191	4.15715e-06	0.00017453
comp2259006_c0_seq2	-1.73567	3.6246	21.1778	4.18583e-06	0.000175459
comp2262362_c0_seq1	-1.48414	5.0658	21.1768	4.18814e-06	0.000175459
comp2277297_c0_seq3	1.64188	2.41078	21.1762	4.1894e-06	0.000175459
gnl|Pdu_trscr_assembly_1|90137	-1.60839	2.70531	21.173	4.19629e-06	0.000175607
comp2266899_c0_seq2	-2.45223	1.66341	21.1575	4.23052e-06	0.000176897
comp2265950_c0_seq7	-3.19617	0.395449	21.154	4.23805e-06	0.00017707
gnl|Pdu_trscr_assembly_1|9334	-1.73495	7.17708	21.152	4.24257e-06	0.000177116
comp2267783_c2_seq1	1.974	4.17709	21.1465	4.25479e-06	0.000177484
comp2278048_c1_seq1	2.18994	2.52866	21.1404	4.26835e-06	0.000177907
comp2278580_c0_seq11	-1.40507	3.80179	21.1383	4.27308e-06	0.000177962
comp2262185_c0_seq1	-2.19003	1.6568	21.1223	4.30875e-06	0.000179304
comp2266805_c0_seq1	-2.84771	0.486117	21.1066	4.34426e-06	0.000180637
comp2209542_c0_seq2	2.1495	3.21357	21.0869	4.38927e-06	0.000182363
comp2268433_c0_seq1	2.11594	1.98533	21.0792	4.40684e-06	0.000182905
comp2266432_c0_seq1	-2.19939	4.81432	21.0781	4.40934e-06	0.000182905
comp2266631_c0_seq1	1.66518	4.38171	21.0762	4.41386e-06	0.000182947
comp2246361_c0_seq1	-2.36392	3.38633	21.0738	4.4194e-06	0.000183031
comp2261881_c0_seq2	-1.53174	3.35353	21.0354	4.50871e-06	0.000186581
comp2261469_c0_seq1	-2.72452	5.53943	21.029	4.5239e-06	0.000187061
comp2269116_c0_seq1	1.84665	4.05307	21.0135	4.56064e-06	0.000188431
comp2246807_c0_seq1	2.39171	-0.594205	21.0052	4.58037e-06	0.000189096
comp2237264_c0_seq1	-7.98114	-0.403319	21.0025	4.58686e-06	0.000189214
comp2269661_c1_seq3	-1.2991	4.60198	20.9956	4.60329e-06	0.000189741
comp2273899_c0_seq2	-1.82101	2.77848	20.9936	4.60823e-06	0.000189794
comp2269260_c0_seq1	2.33023	0.212705	20.9812	4.63801e-06	0.00019087
comp2265744_c0_seq2	2.32147	3.18594	20.9718	4.66095e-06	0.000191603
comp2278343_c2_seq2	1.71398	4.34195	20.9709	4.66319e-06	0.000191603
comp2231993_c0_seq1	-2.80781	0.127418	20.9612	4.68672e-06	0.000192418
comp2274537_c0_seq28	2.37838	8.07855	20.9507	4.71253e-06	0.000193325
comp2239040_c0_seq1	-2.01113	1.78877	20.9463	4.72347e-06	0.000193621
comp2220544_c0_seq1	2.35629	0.432762	20.9407	4.73719e-06	0.000194031
comp2270465_c0_seq1	-2.9355	3.99098	20.9351	4.75109e-06	0.000194447
comp2278437_c0_seq1	-1.63918	3.99605	20.8795	4.89097e-06	0.000200015
gnl|Pdu_trscr_assembly_1|1332	-1.46234	5.76728	20.8689	4.91804e-06	0.000200964
comp2269534_c0_seq3	1.88505	1.76669	20.8596	4.9422e-06	0.000201793
comp1934156_c0_seq1	-1.83002	1.42906	20.8519	4.96204e-06	0.000202444
comp2272111_c1_seq16	1.68555	4.31067	20.8338	5.00903e-06	0.000204201
gnl|Pdu_trscr_assembly_1|16880	2.43447	5.43615	20.8281	5.02404e-06	0.000204653
comp2272100_c0_seq3	2.22208	3.40722	20.8136	5.06235e-06	0.000206052
comp2248271_c0_seq1	-4.11686	-0.746364	20.8094	5.07339e-06	0.00020634
comp2256252_c0_seq1	-1.54998	9.09184	20.8021	5.0928e-06	0.000206968
comp2265493_c0_seq1	-1.31495	6.69012	20.788	5.13029e-06	0.000208329
comp2252443_c0_seq2	4.48205	-1.82548	20.7824	5.14524e-06	0.000208773
comp2257923_c0_seq2	-1.54346	3.48984	20.7697	5.17964e-06	0.000210005
comp2273966_c0_seq7	-1.56316	3.06954	20.7641	5.19481e-06	0.000210457
comp2259397_c0_seq12	2.61699	-0.593451	20.7393	5.26243e-06	0.00021303
comp2231285_c0_seq1	-3.51205	-0.331289	20.7282	5.29302e-06	0.000214102
comp2255197_c0_seq1	-3.4697	-0.507186	20.7254	5.30095e-06	0.000214256
comp2240424_c0_seq2	2.32691	-0.305605	20.7233	5.30675e-06	0.000214324
comp2278099_c1_seq2	-1.37858	5.63184	20.7005	5.37021e-06	0.000216559
comp2251310_c0_seq4	-1.9264	2.1149	20.7004	5.37041e-06	0.000216559
comp2206896_c0_seq1	4.01719	-2.17952	20.6879	5.40564e-06	0.000217811
comp2277927_c0_seq1	-3.05902	1.21014	20.6836	5.41788e-06	0.000218136
comp2252587_c0_seq2	2.73285	-1.59492	20.6668	5.4655e-06	0.000219883
comp2251833_c0_seq1	2.32399	-0.784895	20.6513	5.50985e-06	0.000221496
comp1920273_c0_seq1	-4.2484	2.07861	20.6489	5.51679e-06	0.000221604
comp2249497_c0_seq2	1.9233	5.94538	20.6309	5.56895e-06	0.000223527
comp2259773_c0_seq1	-2.50303	0.678355	20.6193	5.60294e-06	0.000224718
comp2274336_c0_seq18	2.28167	0.181766	20.6019	5.65388e-06	0.000226586
comp2266634_c0_seq1	-3.0015	0.780501	20.5913	5.68544e-06	0.000227675
comp2213012_c1_seq1	3.91948	-1.41251	20.5883	5.69421e-06	0.000227852
comp2267522_c0_seq1	1.77909	3.52157	20.5514	5.80511e-06	0.000231948
comp2277665_c0_seq3	1.63167	5.35636	20.5513	5.8055e-06	0.000231948
comp2222258_c0_seq1	1.31005	3.2382	20.5449	5.82492e-06	0.000232546
comp2271369_c0_seq1	-1.43462	8.29261	20.5178	5.90783e-06	0.000235675
comp2266867_c0_seq2	-1.61596	2.74797	20.4917	5.98917e-06	0.000238737
comp2259353_c0_seq2	5.65658	2.0053	20.4845	6.01161e-06	0.000239347
comp2266191_c3_seq1	-2.42083	1.41305	20.4838	6.01368e-06	0.000239347
comp2245323_c0_seq2	2.56354	3.47414	20.473	6.04794e-06	0.000240527
comp2253814_c0_seq1	-3.19996	0.9588	20.4638	6.07694e-06	0.000241496
comp2276819_c0_seq1	-1.65051	2.1501	20.4545	6.10647e-06	0.000242345
comp2255715_c0_seq2	2.74216	0.806796	20.4542	6.10762e-06	0.000242345
comp2260877_c0_seq1	3.48844	-0.839337	20.4446	6.1381e-06	0.000243323
comp2239961_c0_seq1	-1.74433	2.51034	20.4435	6.14163e-06	0.000243323
comp2260265_c0_seq1	-3.49514	-1.14565	20.4233	6.20696e-06	0.000245725
comp2224794_c0_seq1	2.1098	-0.0878642	20.4208	6.21495e-06	0.000245728
comp2241506_c0_seq1	-1.82122	2.24832	20.4204	6.21648e-06	0.000245728
comp2262938_c0_seq1	1.6798	7.97531	20.4129	6.24093e-06	0.000246507
comp2138236_c0_seq1	-2.73121	0.902304	20.4092	6.2529e-06	0.00024673
comp2263728_c0_seq1	3.79098	3.8045	20.4082	6.25604e-06	0.00024673
comp2271959_c0_seq4	1.91892	4.42798	20.3995	6.28459e-06	0.000247668
comp2261355_c0_seq1	-1.78943	4.54515	20.3937	6.30359e-06	0.000248229
comp2140537_c0_seq1	2.32975	2.01008	20.3778	6.35634e-06	0.000250117
comp2242590_c0_seq1	-3.0059	0.13503	20.3687	6.38675e-06	0.000251124
comp2272875_c0_seq1	1.69768	2.33451	20.3554	6.4312e-06	0.000252681
comp2142807_c0_seq1	-2.12895	4.93834	20.345	6.46622e-06	0.000253865
comp2020617_c0_seq1	-2.50438	0.653061	20.336	6.49652e-06	0.000254862
comp2276609_c1_seq2	-2.62935	1.45749	20.3293	6.51956e-06	0.000255398
comp2265482_c0_seq1	-3.31258	-0.653703	20.3291	6.51998e-06	0.000255398
comp2276599_c1_seq1	-1.75994	2.25522	20.2991	6.62303e-06	0.000259239
comp2267797_c1_seq1	-2.07203	1.99759	20.2968	6.6312e-06	0.000259364
comp2193984_c0_seq1	2.72691	-0.797817	20.293	6.64437e-06	0.000259684
comp2252113_c0_seq1	-4.75217	-1.13254	20.2872	6.66437e-06	0.000260271
comp2254345_c0_seq1	1.87222	4.2494	20.2841	6.67535e-06	0.000260504
comp2271259_c0_seq2	-2.29915	0.705329	20.2811	6.6859e-06	0.00026072
comp2246244_c0_seq1	3.42515	2.88996	20.2749	6.70732e-06	0.00026136
comp2274903_c0_seq2	-2.29993	1.8101	20.2672	6.73454e-06	0.000262224
gnl|Pdu_trscr_assembly_1|7327	-1.36321	4.89674	20.2552	6.77694e-06	0.000263678
comp2210246_c0_seq1	-3.16315	-0.545426	20.2508	6.79247e-06	0.000264085
comp2270447_c0_seq2	4.31221	-0.694456	20.2482	6.80169e-06	0.000264246
comp2277005_c0_seq3	2.47765	4.47537	20.2361	6.84492e-06	0.000265727
comp2270876_c0_seq2	-1.77564	5.37654	20.2312	6.8624e-06	0.000266207
gnl|Pdu_trscr_assembly_1|22617	-1.89009	2.0466	20.2247	6.8857e-06	0.000266912
comp2245955_c0_seq1	-1.58622	6.13144	20.1955	6.99174e-06	0.000270821
comp2266400_c0_seq3	-1.49242	3.72678	20.1848	7.03085e-06	0.000272133
r-opsin1	3.69612	-0.281255	20.1734	7.07298e-06	0.000273365
comp2261516_c0_seq2	-1.646	3.49618	20.1733	7.07319e-06	0.000273365
comp2278199_c2_seq1	1.58569	4.54322	20.1706	7.08333e-06	0.000273554
comp2276086_c0_seq5	2.46471	2.71365	20.1393	7.20007e-06	0.000277763
comp2263643_c1_seq3	2.38167	-0.500001	20.1386	7.20299e-06	0.000277763
comp2269425_c0_seq2	2.4407	2.37313	20.1346	7.21795e-06	0.000278134
comp2142739_c0_seq1	2.01736	1.97162	20.1303	7.23421e-06	0.000278555
comp2262459_c0_seq3	-3.34395	-0.664629	20.1277	7.24398e-06	0.000278725
comp2266660_c0_seq2	3.22086	-0.845585	20.1242	7.25737e-06	0.000279033
comp2277062_c0_seq6	2.16609	2.40434	20.1135	7.29784e-06	0.000280382
comp1988763_c0_seq1	-1.35227	6.52529	20.1072	7.32213e-06	0.000280948
comp2263912_c0_seq4	-3.21783	-0.0628921	20.1069	7.32337e-06	0.000280948
comp2262799_c0_seq2	-2.28036	3.00943	20.1024	7.34052e-06	0.000281266
comp2261571_c0_seq1	2.28871	1.27106	20.1019	7.34246e-06	0.000281266
comp2279956_c0_seq1	-1.99676	3.51825	20.0644	7.48765e-06	0.000286617
comp2255327_c0_seq2	-2.38159	0.272359	20.0618	7.49812e-06	0.000286807
comp2276040_c1_seq5	1.57236	6.8929	20.0144	7.68616e-06	0.000293784
comp2276908_c0_seq5	1.52717	6.33422	20.0103	7.70274e-06	0.000294095
comp2278318_c0_seq9	2.88806	1.57937	20.0084	7.71019e-06	0.000294095
comp2267727_c0_seq2	-2.1293	2.22469	20.0082	7.71125e-06	0.000294095
comp2261525_c1_seq8	-2.44869	0.99683	20.0004	7.74276e-06	0.000295081
comp2215664_c1_seq1	1.87565	1.28785	19.9932	7.77192e-06	0.000295975
comp2274031_c0_seq3	-1.39157	4.26516	19.9821	7.81697e-06	0.000297473
comp2260953_c0_seq2	-1.51789	5.33043	19.9805	7.82377e-06	0.000297515
comp2278485_c0_seq1	-1.50248	6.93918	19.9773	7.83689e-06	0.000297796
comp1981028_c0_seq1	-2.37578	1.57588	19.9731	7.854e-06	0.000298229
comp2275341_c0_seq11	-1.33578	5.49178	19.9684	7.87332e-06	0.000298521
comp2251083_c0_seq1	-1.70229	2.97422	19.9671	7.87874e-06	0.000298521
comp2273870_c0_seq3	-1.66463	2.56604	19.967	7.87889e-06	0.000298521
comp2257469_c0_seq1	-2.53105	-0.023481	19.9636	7.89316e-06	0.000298843
comp2241614_c0_seq2	-3.89139	-0.90593	19.9511	7.94489e-06	0.000300584
comp2269675_c1_seq8	-1.58641	4.17196	19.925	8.05405e-06	0.000304379
comp1970723_c0_seq1	-1.38806	5.74919	19.9232	8.06173e-06	0.000304379
comp2247825_c0_seq1	-1.95906	2.08508	19.9229	8.06275e-06	0.000304379
comp2263428_c0_seq1	-2.32064	0.522726	19.9137	8.10158e-06	0.000305623
comp2272961_c0_seq1	1.66537	2.92729	19.912	8.10878e-06	0.000305674
comp2207445_c0_seq1	-3.01197	-0.434221	19.9009	8.15615e-06	0.000307237
comp2220452_c1_seq1	-2.24464	3.28493	19.8954	8.17953e-06	0.000307895
comp2278375_c1_seq2	-2.40802	0.0753381	19.8848	8.22527e-06	0.000309393
comp2261591_c0_seq1	2.57455	1.0491	19.8694	8.29149e-06	0.000311658
comp2278922_c0_seq1	1.79764	1.97684	19.8671	8.30154e-06	0.000311811
comp2269060_c1_seq1	-2.26616	6.49553	19.8647	8.3119e-06	0.000311914
comp2264779_c0_seq1	1.52698	4.32979	19.8637	8.31626e-06	0.000311914
comp2268453_c0_seq1	1.71555	4.71326	19.8614	8.32636e-06	0.000311968
comp2278064_c1_seq6	1.60172	2.27334	19.8606	8.32974e-06	0.000311968
comp2273472_c0_seq1	1.89224	3.67331	19.8593	8.33568e-06	0.000311968
comp2264493_c0_seq2	-1.70551	3.51374	19.8307	8.46122e-06	0.000316439
comp1781461_c0_seq1	-1.8088	4.18831	19.8269	8.47805e-06	0.000316654
comp2249071_c0_seq1	-7.0112	-2.20754	19.8267	8.47915e-06	0.000316654
comp2259952_c0_seq1	-5.17305	-0.473026	19.8212	8.50331e-06	0.000317329
comp2274759_c0_seq1	-2.43714	1.02762	19.8137	8.53707e-06	0.000318361
gnl|Pdu_trscr_assembly_1|1056	1.87323	5.15058	19.7945	8.62318e-06	0.000321341
comp2251957_c0_seq1	2.47232	0.809171	19.7865	8.65916e-06	0.000322452
comp2259602_c0_seq3	1.83855	0.520247	19.7815	8.68178e-06	0.000323063
comp2271574_c0_seq2	1.99921	1.61341	19.7778	8.69868e-06	0.00032346
gnl|Pdu_trscr_assembly_1|4228	-1.98922	3.43027	19.7697	8.73554e-06	0.000324599
comp2263359_c0_seq1	-2.10513	1.34292	19.7665	8.75052e-06	0.000324924
comp2266000_c0_seq1	1.83647	3.50405	19.7595	8.78249e-06	0.000325878
comp2267042_c1_seq11	-2.37776	4.76606	19.7344	8.89865e-06	0.000329954
comp2271029_c0_seq1	-1.6991	4.99047	19.7309	8.91463e-06	0.000330311
comp2257439_c0_seq1	-2.20403	0.983521	19.696	9.07911e-06	0.000336111
comp2240418_c0_seq1	-3.36567	-0.413337	19.695	9.08409e-06	0.000336111
comp2240131_c0_seq3	2.06432	1.10896	19.6763	9.1733e-06	0.000339171
comp2254631_c0_seq1	1.88717	7.13004	19.6446	9.32651e-06	0.000344591
comp2261667_c0_seq1	-1.99398	1.29331	19.6298	9.39894e-06	0.000347021
comp2272059_c1_seq1	1.42288	6.50251	19.605	9.52189e-06	0.000351311
comp1974124_c0_seq1	-3.23646	1.16989	19.6027	9.53367e-06	0.000351497
comp1769718_c0_seq1	-2.13884	4.97044	19.5976	9.55911e-06	0.000352185
comp2277430_c0_seq5	-2.05413	2.52604	19.5713	9.69147e-06	0.000356809
comp2246367_c0_seq1	-2.08322	0.903337	19.5667	9.71467e-06	0.000357297
comp2228369_c0_seq1	-1.57309	9.20867	19.566	9.71845e-06	0.000357297
comp2277737_c0_seq3	-1.37575	3.33066	19.5515	9.79252e-06	0.000359766
comp2242993_c0_seq2	2.12976	3.73384	19.5292	9.90728e-06	0.000363726
comp2272717_c1_seq3	-1.77841	3.4172	19.5233	9.93781e-06	0.00036459
comp2273595_c0_seq1	-2.03224	4.81815	19.5172	9.9699e-06	0.000365509
comp2273570_c0_seq3	-1.48586	2.99757	19.4942	1.00904e-05	0.000369666
comp2220677_c0_seq1	3.29232	4.10931	19.4924	1.01002e-05	0.000369764
comp2201252_c0_seq1	-6.52482	-0.264217	19.479	1.01711e-05	0.000372099
comp2264496_c0_seq2	2.8647	-1.8404	19.4648	1.02469e-05	0.00037461
comp2250374_c0_seq1	2.7577	-0.659131	19.4464	1.03461e-05	0.000377971
gnl|Pdu_trscr_assembly_1|10967	1.75279	2.00594	19.4109	1.05406e-05	0.000384633
comp2272937_c0_seq1	-1.33869	5.81214	19.4104	1.05432e-05	0.000384633
comp2278048_c0_seq4	2.11757	4.58806	19.4072	1.05608e-05	0.000385002
comp2274476_c0_seq5	-2.05488	2.16345	19.3958	1.0624e-05	0.000387038
comp1194215_c0_seq1	-2.07689	2.32819	19.3945	1.06315e-05	0.000387038
comp2272472_c0_seq5	1.61462	2.618	19.3839	1.06905e-05	0.000388915
comp2248410_c0_seq1	-1.84056	1.84377	19.377	1.07291e-05	0.000390046
comp2276621_c1_seq7	2.54293	0.857175	19.3673	1.07835e-05	0.000391751
comp2277266_c0_seq3	-1.90302	3.51234	19.3645	1.07998e-05	0.00039207
comp2281439_c0_seq1	4.74841	4.05011	19.3571	1.08417e-05	0.000393316
comp2268408_c0_seq1	-2.22051	2.98839	19.3549	1.08543e-05	0.000393497
comp2270623_c2_seq1	1.63788	3.2214	19.3436	1.09187e-05	0.000395557
comp2264956_c0_seq1	-1.90073	3.0371	19.3411	1.09327e-05	0.000395791
comp2253849_c0_seq1	4.16197	-2.9506	19.3348	1.09686e-05	0.000396815
comp2272717_c0_seq1	-1.86949	1.65711	19.33	1.09968e-05	0.000397556
comp2275930_c1_seq1	-2.19638	1.75771	19.3277	1.10097e-05	0.000397749
comp2127369_c0_seq1	-2.15772	1.71585	19.3182	1.10648e-05	0.00039946
comp2236509_c0_seq6	-1.44831	3.95653	19.3159	1.10783e-05	0.000399516
comp2264626_c0_seq3	1.35442	2.81185	19.3153	1.10817e-05	0.000399516
comp2253699_c0_seq2	1.58635	2.6038	19.304	1.11474e-05	0.000401607
comp2138964_c0_seq1	-1.81152	2.68808	19.297	1.11885e-05	0.000402808
comp2274196_c1_seq2	-1.69671	2.22601	19.272	1.13356e-05	0.00040758
comp2257477_c0_seq1	-1.60953	1.78768	19.2718	1.13367e-05	0.00040758
comp2270227_c0_seq1	-1.715	4.73472	19.2618	1.13962e-05	0.000409247
comp2257652_c0_seq1	-1.88825	3.58992	19.2614	1.13988e-05	0.000409247
comp2270326_c0_seq1	1.50892	6.03889	19.2516	1.14575e-05	0.000411072
comp2269180_c0_seq3	2.67278	0.270408	19.2475	1.14819e-05	0.000411666
comp2277129_c2_seq1	2.43024	4.33736	19.2434	1.15065e-05	0.000412263
comp2227117_c0_seq2	-1.26242	4.91346	19.2412	1.152e-05	0.000412462
comp2264334_c0_seq1	2.35868	3.76135	19.2349	1.1558e-05	0.000413538
comp2275941_c0_seq9	1.49891	6.25759	19.2327	1.15712e-05	0.000413559
comp2248164_c0_seq1	1.76349	2.95573	19.2322	1.15745e-05	0.000413559
comp2273176_c1_seq6	-1.4384	3.97007	19.2232	1.1629e-05	0.000415221
comp2269145_c0_seq2	-2.08083	3.4612	19.2132	1.16904e-05	0.000417129
comp2277345_c0_seq7	1.83757	4.00857	19.1876	1.18483e-05	0.000422471
comp2275288_c0_seq3	-1.95166	4.32948	19.1744	1.19303e-05	0.000425106
comp2238583_c0_seq1	-2.28031	2.50811	19.1548	1.20537e-05	0.000429209
comp2278215_c0_seq13	-1.47792	5.07796	19.128	1.22238e-05	0.000434969
comp2254476_c0_seq1	-2.35008	0.704757	19.1245	1.22464e-05	0.000435475
comp2250352_c0_seq2	-3.18983	1.28829	19.1191	1.2281e-05	0.000436287
comp2269271_c0_seq4	1.71623	3.17354	19.1183	1.2286e-05	0.000436287
comp2260488_c0_seq1	-2.07459	1.97321	19.1133	1.23184e-05	0.000437141
comp2207063_c0_seq1	-1.47302	4.23525	19.1103	1.23375e-05	0.000437518
comp2277636_c1_seq2	1.75477	6.30064	19.1082	1.23512e-05	0.000437705
comp2277231_c0_seq2	2.00427	0.962866	19.0878	1.24838e-05	0.000441853
comp2249336_c0_seq1	1.96982	4.39274	19.0876	1.24852e-05	0.000441853
comp2261897_c0_seq2	2.34482	2.58149	19.0719	1.25883e-05	0.000445201
comp2269064_c0_seq7	1.94969	2.39561	19.0641	1.26403e-05	0.000446735
comp2258238_c0_seq1	-2.78457	0.488334	19.0611	1.266e-05	0.000447128
comp2254520_c0_seq1	-1.66463	8.52681	19.0512	1.27259e-05	0.000449152
comp2261818_c0_seq3	2.69418	0.784581	19.0426	1.27834e-05	0.000450875
comp2257239_c0_seq2	-1.84256	3.30363	19.0341	1.28402e-05	0.00045257
comp2276307_c0_seq1	-1.75962	4.11137	19.0285	1.28781e-05	0.0004536
comp2220459_c0_seq1	-2.89552	0.331032	19.0007	1.30671e-05	0.000459947
comp2256160_c0_seq1	2.25497	0.336691	18.9952	1.31051e-05	0.000460901
comp2260482_c0_seq1	1.99267	5.51468	18.9942	1.31119e-05	0.000460901
comp2258192_c0_seq1	-2.30226	1.94034	18.9915	1.31301e-05	0.000461228
comp2269671_c0_seq2	1.90675	8.36092	18.9665	1.33033e-05	0.000466859
comp1847822_c0_seq1	3.21956	-0.92825	18.9658	1.33083e-05	0.000466859
comp2251408_c0_seq1	-1.61722	1.90335	18.9614	1.33392e-05	0.000467627
comp2201767_c0_seq1	-2.83508	1.34665	18.9572	1.33686e-05	0.000468343
comp2274615_c1_seq2	2.27713	-0.0867389	18.9376	1.35067e-05	0.000472588
comp2244915_c0_seq2	-1.86513	4.23054	18.9374	1.3508e-05	0.000472588
comp2249511_c0_seq1	2.1023	-0.662626	18.9304	1.35574e-05	0.000473998
comp2247149_c0_seq3	5.31481	-0.859048	18.9254	1.35933e-05	0.000474935
comp2271287_c1_seq1	-2.77624	1.20279	18.9054	1.37365e-05	0.000479615
comp2276088_c1_seq1	2.19926	1.04322	18.9015	1.37647e-05	0.00048028
comp2254377_c0_seq1	3.4062	-0.643742	18.8828	1.38998e-05	0.000484667
comp2272087_c1_seq4	-1.8809	4.38396	18.8751	1.39562e-05	0.000486309
comp2268331_c0_seq1	1.71646	5.73648	18.8683	1.40064e-05	0.000487733
comp1315948_c0_seq1	2.67306	3.4043	18.8669	1.40164e-05	0.000487754
gnl|Pdu_trscr_assembly_1|13757	-1.41163	3.30973	18.8526	1.41216e-05	0.000491086
comp2270479_c0_seq1	-2.43186	2.00332	18.8506	1.4137e-05	0.000491292
comp2277062_c1_seq2	2.9812	1.72862	18.8244	1.43322e-05	0.000497744
comp2276278_c0_seq2	-1.33757	3.80475	18.822	1.43504e-05	0.000498043
comp1192934_c0_seq1	2.4473	2.28629	18.8195	1.43693e-05	0.000498369
comp2250963_c0_seq1	2.50867	-1.74771	18.8028	1.44955e-05	0.00050241
comp2277700_c0_seq9	-1.19975	5.08215	18.7894	1.45978e-05	0.00050562
comp2269859_c0_seq1	2.03705	4.33609	18.7635	1.47971e-05	0.000512182
comp2254623_c0_seq1	-1.94775	1.96309	18.7601	1.48234e-05	0.000512751
comp2260456_c0_seq2	2.40233	6.98191	18.7523	1.48847e-05	0.000514531
gnl|Pdu_trscr_assembly_1|8306	-1.50051	3.13149	18.7509	1.48951e-05	0.000514547
comp2276597_c0_seq2	1.33966	5.30858	18.7459	1.49344e-05	0.000515563
comp2279527_c0_seq1	2.43059	3.28452	18.7431	1.4956e-05	0.000515969
comp2142789_c0_seq2	-1.6766	2.40984	18.7368	1.50055e-05	0.000517055
comp2248802_c1_seq2	1.66919	1.91439	18.7366	1.50074e-05	0.000517055
comp2254316_c0_seq1	-3.58646	1.85977	18.7298	1.50607e-05	0.000518414
comp2265773_c0_seq2	1.74454	2.33729	18.7278	1.50769e-05	0.000518414
comp2247387_c0_seq3	-2.46607	0.21205	18.7267	1.50857e-05	0.000518414
comp2274497_c0_seq1	-2.07838	2.54234	18.7266	1.50867e-05	0.000518414
comp2267886_c0_seq2	-2.46673	0.666805	18.718	1.51543e-05	0.000520393
comp2274727_c0_seq2	2.25385	0.15699	18.7143	1.51838e-05	0.000521063
comp2242968_c0_seq2	-2.19278	-0.0871847	18.7106	1.52135e-05	0.000521737
comp2212838_c1_seq1	-3.09565	0.170745	18.7042	1.52648e-05	0.000523154
comp2264592_c1_seq2	-2.29085	0.200353	18.6953	1.53359e-05	0.000525246
comp2264117_c0_seq1	2.71641	-0.963049	18.6816	1.54469e-05	0.000528698
comp2246999_c0_seq1	1.42133	5.47993	18.6772	1.5482e-05	0.00052955
comp2235322_c0_seq1	-2.21559	2.43426	18.6669	1.55658e-05	0.000532069
comp2279593_c0_seq1	-1.27784	4.1633	18.6639	1.55909e-05	0.000532577
comp2138945_c0_seq1	2.21184	0.880724	18.6569	1.56482e-05	0.000534182
comp2261395_c0_seq1	-2.27386	3.21271	18.6438	1.5756e-05	0.000537511
comp2276386_c0_seq1	1.57045	7.02546	18.631	1.58622e-05	0.000540778
comp2278583_c0_seq1	-1.35808	4.27026	18.6232	1.5927e-05	0.000542634
comp2139274_c0_seq1	5.01544	-0.917449	18.618	1.59702e-05	0.00054375
comp2256095_c0_seq1	-2.50487	1.73282	18.6156	1.59905e-05	0.000544083
comp2265239_c0_seq1	-2.67618	-0.155671	18.6005	1.61176e-05	0.000547997
comp2271279_c0_seq2	2.03626	2.28253	18.5995	1.61265e-05	0.000547997
comp2265867_c0_seq7	-2.91791	1.13052	18.5978	1.6141e-05	0.000548
comp2266648_c0_seq2	-2.42395	0.73635	18.597	1.61477e-05	0.000548
gnl|Pdu_trscr_assembly_1|7485	1.54912	1.91097	18.5945	1.61686e-05	0.000548061
comp2250982_c0_seq1	-1.66378	2.66142	18.5943	1.61705e-05	0.000548061
comp2269365_c0_seq1	1.46371	6.48764	18.5767	1.63207e-05	0.000552791
comp2267814_c0_seq7	1.72657	3.79619	18.5596	1.64672e-05	0.000557391
comp2245862_c0_seq1	-2.10198	0.61951	18.5481	1.65666e-05	0.000560392
comp2276498_c0_seq1	-2.30754	4.48746	18.5423	1.66172e-05	0.000561738
comp2247091_c1_seq1	-3.10606	2.41532	18.5377	1.66576e-05	0.000562736
comp2254394_c0_seq2	-1.66335	9.14902	18.5211	1.68032e-05	0.000567289
comp2247881_c0_seq1	-1.66905	2.48709	18.5007	1.69845e-05	0.000573037
comp2138556_c0_seq1	3.67022	-1.70277	18.4912	1.70687e-05	0.000575506
comp2252920_c0_seq1	-3.52782	1.24134	18.4801	1.71683e-05	0.000578489
comp2252269_c1_seq2	-1.97776	0.599755	18.4659	1.72971e-05	0.000582452
comp2266617_c0_seq1	2.3311	4.20376	18.4531	1.74137e-05	0.000585998
comp2276183_c0_seq5	-1.49941	3.69426	18.4495	1.74467e-05	0.00058673
comp2060830_c0_seq2	-7.22969	-1.18096	18.4432	1.75046e-05	0.000588298
comp2264599_c0_seq1	1.51473	3.62224	18.432	1.76076e-05	0.000591377
comp2271444_c1_seq4	-1.73317	7.97568	18.4308	1.7619e-05	0.000591379
comp2198797_c0_seq2	-4.0085	-0.017236	18.4223	1.76974e-05	0.000593509
comp2256415_c0_seq2	-4.20037	-0.179727	18.4215	1.77053e-05	0.000593509
comp1425511_c0_seq1	1.70816	1.30119	18.4022	1.78848e-05	0.000598983
comp1193891_c0_seq1	2.24992	3.45169	18.4015	1.78916e-05	0.000598983
comp2271735_c0_seq3	2.1078	3.09538	18.3882	1.80172e-05	0.0006028
comp2253278_c0_seq3	-1.50271	3.10765	18.3864	1.80345e-05	0.000602992
comp2254120_c0_seq2	5.82928	-1.73104	18.3666	1.82227e-05	0.000608893
comp2273174_c0_seq4	-3.31291	-0.118449	18.3639	1.82485e-05	0.000609363
comp2265826_c0_seq2	-2.55766	5.67848	18.3513	1.83697e-05	0.000613017
comp2260692_c0_seq3	-1.66424	1.34742	18.3461	1.84195e-05	0.000614285
comp2253333_c0_seq2	-3.17537	-0.852789	18.3401	1.84779e-05	0.000615839
comp2269448_c0_seq4	-1.8923	2.87008	18.3224	1.86499e-05	0.000621175
comp2197643_c0_seq1	-1.82015	4.98575	18.311	1.87625e-05	0.000624525
comp2274909_c0_seq7	-2.29225	12.9761	18.3061	1.88101e-05	0.000625709
comp2217273_c0_seq1	-1.42511	4.33692	18.2903	1.89673e-05	0.000630536
comp2260528_c0_seq1	2.03085	2.67069	18.2878	1.89918e-05	0.000630909
comp2272390_c0_seq16	-2.39842	5.62786	18.2867	1.90028e-05	0.000630909
comp2255849_c0_seq3	-2.65605	-0.675202	18.2799	1.90705e-05	0.000632755
comp2269924_c0_seq3	-2.04126	1.1413	18.2717	1.91529e-05	0.000634535
comp2266747_c0_seq1	2.04142	3.34575	18.2712	1.91585e-05	0.000634535
comp2275664_c0_seq4	1.42971	4.56194	18.2709	1.91607e-05	0.000634535
comp2274279_c0_seq3	1.26261	4.87017	18.2583	1.92886e-05	0.000638362
comp2259339_c1_seq2	-2.51426	-0.314876	18.2539	1.93331e-05	0.000639034
comp2270832_c0_seq5	2.63119	1.6289	18.2539	1.93334e-05	0.000639034
comp2140493_c0_seq1	-2.90302	2.39537	18.252	1.93523e-05	0.000639087
comp2264020_c0_seq1	-1.81251	3.34541	18.2513	1.93596e-05	0.000639087
comp2254330_c0_seq1	-2.02781	2.58141	18.2237	1.96421e-05	0.000648004
gnl|Pdu_trscr_assembly_1|15988	2.00595	1.75528	18.2034	1.98519e-05	0.00065451
comp2128864_c0_seq1	-1.40074	3.05726	18.1964	1.99257e-05	0.000656527
comp2258124_c1_seq1	4.75798	-0.0972149	18.1891	2.00021e-05	0.000658626
comp2233646_c0_seq2	3.39262	-1.40808	18.1872	2.00216e-05	0.000658854
comp2267712_c0_seq1	2.19327	1.31232	18.183	2.00658e-05	0.000659889
comp2273480_c0_seq4	2.48605	0.554331	18.1809	2.00883e-05	0.000660212
comp2257713_c0_seq1	-1.62706	2.90962	18.173	2.01713e-05	0.000662523
comp2242472_c0_seq1	2.56118	0.949699	18.1588	2.03233e-05	0.000667095
comp2256366_c0_seq1	-3.20377	-0.984675	18.1542	2.03718e-05	0.000668266
comp2278087_c0_seq7	1.50474	4.49542	18.153	2.03847e-05	0.000668267
comp2275494_c0_seq2	1.63708	8.19914	18.1508	2.04081e-05	0.000668612
comp2271573_c0_seq1	-1.65115	2.19359	18.12	2.07414e-05	0.000679106
comp2250163_c0_seq2	-1.75952	1.63333	18.1165	2.07796e-05	0.000679631
comp2240222_c0_seq1	4.30357	-0.578898	18.1161	2.07836e-05	0.000679631
comp2278311_c0_seq6	-1.74596	4.07317	18.1129	2.08187e-05	0.000680352
comp2267716_c0_seq2	2.17869	4.66665	18.1101	2.08493e-05	0.000680926
comp2249213_c0_seq3	2.70188	-0.67695	18.108	2.0872e-05	0.000681237
gnl|Pdu_trscr_assembly_1|87723	-4.20073	-0.00895568	18.1062	2.08919e-05	0.00068146
comp2263854_c0_seq1	2.08409	3.74071	18.1044	2.09122e-05	0.000681696
comp2264479_c0_seq6	2.01304	1.09109	18.0921	2.10473e-05	0.000685669
comp2238602_c0_seq1	2.40399	2.06227	18.0893	2.10779e-05	0.000686238
gnl|Pdu_trscr_assembly_1|86954	1.6438	2.24977	18.0873	2.11006e-05	0.000686547
comp2252751_c0_seq1	2.43349	0.351937	18.0849	2.11269e-05	0.000686974
comp2266409_c0_seq1	-1.39763	5.82198	18.0741	2.12474e-05	0.000690058
comp2266652_c1_seq5	3.4744	-0.43411	18.074	2.12482e-05	0.000690058
comp2277331_c1_seq5	1.52448	5.10424	18.0666	2.13311e-05	0.000691871
comp2271511_c0_seq2	2.36632	2.08396	18.0657	2.1341e-05	0.000691871
comp2276455_c0_seq2	1.99341	1.60109	18.0655	2.13439e-05	0.000691871
comp1926910_c0_seq1	-1.62462	3.45685	18.0628	2.1374e-05	0.000692414
comp2277414_c0_seq1	1.53581	3.27718	18.058	2.1428e-05	0.00069373
comp2257627_c0_seq2	1.60041	2.81125	18.0529	2.14857e-05	0.000695166
comp2277084_c0_seq2	-2.56446	2.07099	18.0489	2.15299e-05	0.000696164
comp2280496_c0_seq1	-1.77611	2.62428	18.0378	2.16558e-05	0.000699801
comp2271284_c0_seq4	2.5662	1.68607	18.0316	2.1727e-05	0.000701423
comp2256628_c0_seq2	1.90368	0.177033	18.0311	2.17329e-05	0.000701423
comp2265986_c0_seq1	1.54898	6.71974	18.0266	2.17839e-05	0.000702633
comp2237339_c0_seq1	2.54023	-1.32353	18.0184	2.1878e-05	0.000705232
comp2262891_c0_seq3	-2.73501	-0.0527631	18.0158	2.19083e-05	0.000705771
comp2267916_c0_seq1	1.70433	1.8279	18.0146	2.1922e-05	0.000705775
comp2269908_c0_seq1	2.61669	1.54997	17.9979	2.21144e-05	0.000711529
comp2222948_c0_seq2	-3.24706	0.0321908	17.9927	2.21758e-05	0.000713064
comp2271836_c0_seq2	1.46978	4.88754	17.9812	2.23094e-05	0.000716918
comp2223422_c0_seq1	-1.36836	3.51937	17.9664	2.24835e-05	0.000722064
comp2274903_c1_seq1	-4.53899	-1.51352	17.9538	2.26328e-05	0.000726412
comp2255251_c0_seq1	2.19683	0.546855	17.9353	2.28539e-05	0.000733058
comp2277913_c2_seq2	-2.08019	2.44227	17.9308	2.29086e-05	0.00073436
comp2212642_c0_seq1	-6.71209	-1.86189	17.9284	2.29371e-05	0.000734821
comp2200976_c0_seq2	2.78781	-1.65862	17.9259	2.29669e-05	0.000735321
comp2277456_c0_seq1	1.74756	6.01667	17.913	2.31234e-05	0.00073971
comp2246597_c0_seq1	-2.81368	-1.08407	17.9123	2.31324e-05	0.00073971
comp2265840_c0_seq3	2.34677	1.68631	17.9039	2.32339e-05	0.000742502
comp2256852_c0_seq1	-1.45378	3.53968	17.8802	2.3525e-05	0.000751342
comp2257660_c0_seq2	-2.42127	1.63987	17.8755	2.35836e-05	0.000752752
comp2239730_c1_seq1	-4.55499	-1.64167	17.8737	2.36059e-05	0.000753001
comp1949817_c0_seq2	-3.00268	0.604817	17.8695	2.36588e-05	0.000754227
comp2256979_c0_seq1	-2.46669	-0.17562	17.8584	2.37971e-05	0.000758171
comp2259865_c1_seq5	-3.92108	-1.00719	17.8557	2.38311e-05	0.00075879
comp2276343_c0_seq1	-1.36591	5.40668	17.8537	2.38558e-05	0.000759112
comp2276985_c0_seq1	-2.02379	3.10648	17.8476	2.39325e-05	0.000761088
comp2275263_c0_seq3	1.9832	2.00461	17.8418	2.40058e-05	0.000762952
comp2276182_c0_seq1	-1.31722	4.43893	17.8352	2.40882e-05	0.000764687
comp2277384_c0_seq3	-2.1438	5.74845	17.8351	2.40897e-05	0.000764687
comp2234598_c0_seq1	-2.68713	-0.495974	17.8297	2.41577e-05	0.000766377
comp2275530_c0_seq7	2.13653	4.9141	17.8236	2.42353e-05	0.000768371
comp2267162_c0_seq2	1.78176	3.4405	17.8221	2.42545e-05	0.000768513
comp1897429_c0_seq1	1.36868	3.85401	17.811	2.43973e-05	0.000772566
comp2278221_c0_seq3	2.09268	3.38788	17.8028	2.45018e-05	0.000775404
comp2268087_c0_seq17	-1.61847	2.40364	17.7907	2.46589e-05	0.0007799
comp2200669_c0_seq1	-2.23544	0.336345	17.7843	2.47423e-05	0.000782064
comp2257679_c0_seq1	-6.92794	-1.42475	17.773	2.48894e-05	0.000786237
comp2271795_c0_seq1	-1.61785	5.06301	17.7677	2.49588e-05	0.000787557
comp2274467_c1_seq5	1.74129	4.50122	17.7675	2.49615e-05	0.000787557
comp2277563_c0_seq3	-1.15299	4.84968	17.7645	2.50005e-05	0.000788208
comp2276539_c0_seq2	-1.28765	5.07051	17.7636	2.50124e-05	0.000788208
comp2266783_c2_seq1	1.85934	1.0562	17.7567	2.51035e-05	0.000790601
comp2270506_c0_seq11	2.18131	3.79105	17.7536	2.51443e-05	0.000791407
comp2258868_c0_seq2	1.58177	2.44264	17.7495	2.51978e-05	0.000792612
comp2219624_c0_seq2	2.60488	-0.258543	17.7442	2.5268e-05	0.00079434
comp2270235_c0_seq2	-2.45406	5.1333	17.734	2.54049e-05	0.000798163
comp2249971_c0_seq2	2.69123	-0.325767	17.7262	2.55096e-05	0.000800966
comp2275542_c0_seq9	-2.14017	3.94476	17.7235	2.55451e-05	0.0008016
comp2265588_c0_seq1	-2.03855	0.976853	17.7198	2.55946e-05	0.00080267
comp2239935_c0_seq1	-1.30492	7.14683	17.7148	2.56621e-05	0.000804302
comp2277968_c0_seq7	2.12544	2.05445	17.7083	2.57498e-05	0.000806564
comp2259320_c0_seq2	-2.1576	0.808828	17.7016	2.58403e-05	0.000808616
gnl|Pdu_trscr_assembly_1|17420	-2.96181	0.772716	17.7007	2.5853e-05	0.000808616
comp2276328_c1_seq7	-1.28613	3.71012	17.7001	2.58619e-05	0.000808616
comp2268821_c0_seq7	2.13136	1.73122	17.6822	2.61056e-05	0.000815744
comp2274598_c0_seq1	-1.77743	1.48239	17.6708	2.62627e-05	0.000820163
comp2226330_c0_seq1	-1.45971	3.22802	17.6666	2.63201e-05	0.000821463
comp2274684_c0_seq22	1.48652	5.00542	17.6609	2.63997e-05	0.000823454
comp2261428_c0_seq1	-1.5079	9.88409	17.6523	2.65189e-05	0.000826315
comp2257529_c0_seq1	-1.36513	7.01499	17.652	2.65232e-05	0.000826315
comp2272127_c0_seq2	1.40039	2.86084	17.6462	2.66051e-05	0.000828371
comp2258057_c0_seq1	-2.53492	-0.0951434	17.6405	2.66847e-05	0.000830353
comp2276017_c0_seq2	1.87775	3.25147	17.639	2.67052e-05	0.000830493
comp2273962_c0_seq6	1.90642	2.60519	17.6369	2.67344e-05	0.000830906
comp2259828_c0_seq1	-2.03303	0.992368	17.6182	2.69998e-05	0.000838654
comp2275548_c0_seq1	-1.40139	4.806	17.6161	2.70297e-05	0.00083908
comp2256232_c0_seq1	5.78549	-1.2875	17.6105	2.71088e-05	0.000840898
comp2268955_c0_seq1	-1.54937	3.0535	17.6067	2.71635e-05	0.000840898
comp2266510_c0_seq2	-1.60261	2.50636	17.6066	2.71647e-05	0.000840898
comp2263395_c0_seq1	1.64369	1.03725	17.6046	2.71927e-05	0.000840898
comp2202216_c0_seq1	-3.09841	-0.316276	17.6045	2.7194e-05	0.000840898
comp2277301_c0_seq8	1.30972	4.50241	17.6035	2.72081e-05	0.000840898
gnl|Pdu_trscr_assembly_1|13594	-1.95933	1.6528	17.6021	2.72285e-05	0.000840898
comp2265764_c0_seq1	-2.08166	0.953784	17.6021	2.72291e-05	0.000840898
comp2101170_c0_seq2	-3.83332	0.850688	17.6018	2.72336e-05	0.000840898
comp2252741_c0_seq1	2.44302	-1.69524	17.598	2.72875e-05	0.000841564
comp2274399_c0_seq2	-2.27757	-0.153099	17.5971	2.73002e-05	0.000841564
comp2271960_c0_seq6	-2.29565	2.86491	17.5969	2.73037e-05	0.000841564
comp2253379_c0_seq1	1.37706	4.23755	17.5813	2.75278e-05	0.000847958
comp2267120_c1_seq7	-1.93544	1.16743	17.5802	2.75437e-05	0.000847958
gnl|Pdu_trscr_assembly_1|5530	-1.76003	5.31907	17.5649	2.77667e-05	0.000854318
comp2270588_c0_seq2	1.35052	5.34306	17.557	2.78817e-05	0.000857351
comp2188296_c0_seq1	-1.40285	3.22106	17.5519	2.79569e-05	0.000859156
comp2247536_c0_seq1	2.03903	1.33391	17.5505	2.7977e-05	0.000859267
comp2275295_c1_seq2	2.21597	4.21931	17.5338	2.8225e-05	0.000866371
comp2277144_c0_seq3	1.46307	3.99291	17.5213	2.8411e-05	0.000871568
comp2273222_c0_seq2	-1.74631	4.52729	17.5174	2.84687e-05	0.000872822
comp2267789_c2_seq4	-2.29632	0.161535	17.5019	2.87023e-05	0.000879465
comp2254007_c0_seq1	2.22599	1.02426	17.5006	2.8721e-05	0.000879521
comp2259837_c0_seq2	-1.86329	2.63759	17.4916	2.88579e-05	0.000883194
comp2276070_c0_seq2	1.73129	4.38674	17.4905	2.88751e-05	0.000883203
comp2269806_c0_seq1	1.64868	2.6006	17.445	2.95734e-05	0.000904029
comp1985114_c0_seq1	-1.52008	3.32587	17.421	2.99501e-05	0.000915008
comp2273319_c0_seq3	-2.08223	0.681321	17.4146	3.00511e-05	0.000917029
comp2261940_c0_seq1	-1.73602	1.03776	17.4146	3.00515e-05	0.000917029
comp2252656_c0_seq1	-1.63614	1.97514	17.4011	3.02644e-05	0.000922984
comp2276865_c0_seq4	2.00471	3.2168	17.3996	3.02895e-05	0.000923208
comp2250260_c0_seq1	-1.30356	4.93776	17.3917	3.04149e-05	0.000926489
comp1339124_c0_seq1	-2.67805	5.37829	17.3781	3.06343e-05	0.000932627
comp2267649_c1_seq1	-2.14404	0.762953	17.3653	3.08411e-05	0.000938375
comp2258103_c0_seq1	-1.58103	2.32669	17.3641	3.08598e-05	0.000938395
comp2274190_c1_seq3	2.57075	4.25995	17.3617	3.08996e-05	0.000939056
comp2270432_c0_seq1	-1.30831	6.49837	17.3496	3.10964e-05	0.000944484
comp2142853_c0_seq1	-1.65998	2.01366	17.3459	3.11563e-05	0.000945753
comp2263713_c0_seq2	-1.42596	4.81024	17.3346	3.13431e-05	0.000950869
comp2274969_c0_seq7	1.37768	3.89712	17.3269	3.14695e-05	0.000954147
comp2022008_c0_seq1	-2.38025	1.29649	17.31	3.17505e-05	0.000962106
comp2270984_c0_seq2	1.82401	3.75803	17.2903	3.20812e-05	0.000971563
comp2140816_c0_seq1	-3.93841	-1.42421	17.2724	3.23857e-05	0.000980214
comp2247041_c0_seq3	-2.98916	-0.872532	17.2541	3.26999e-05	0.000989148
comp2275034_c0_seq1	-4.31404	-1.62631	17.2452	3.2853e-05	0.000993164
comp2277763_c0_seq2	1.7253	4.49026	17.2442	3.28708e-05	0.000993164
comp2261767_c1_seq3	2.51592	-0.287272	17.2426	3.28978e-05	0.000993243
comp2277697_c0_seq1	2.52764	2.47893	17.2418	3.29116e-05	0.000993243
comp2259138_c0_seq2	2.16092	0.848188	17.2358	3.30149e-05	0.000995419
comp2263996_c0_seq7	-2.50606	2.33394	17.2354	3.30219e-05	0.000995419
comp2258542_c0_seq2	2.285	1.15066	17.2322	3.30781e-05	0.000996535
comp1194390_c0_seq1	-2.05625	2.97539	17.2301	3.31154e-05	0.000997082
comp2046374_c0_seq1	1.9259	0.33239	17.219	3.33083e-05	0.00100231
comp2272158_c0_seq2	1.97609	2.95009	17.1991	3.36588e-05	0.00101227
gnl|Pdu_trscr_assembly_1|7679	2.47243	1.47002	17.1957	3.37193e-05	0.00101351
comp2261386_c0_seq1	1.76649	3.65047	17.1913	3.37974e-05	0.00101493
comp2269547_c0_seq1	1.42915	4.65054	17.1909	3.38058e-05	0.00101493
comp2249058_c0_seq2	-1.89654	5.09782	17.167	3.42339e-05	0.0010272
comp2268498_c0_seq1	-1.26759	3.22299	17.1642	3.42829e-05	0.00102807
comp2247680_c0_seq1	-3.27968	-1.19491	17.1616	3.43304e-05	0.0010289
comp2273503_c0_seq2	-2.0345	0.752724	17.1563	3.44272e-05	0.00103121
comp2235819_c0_seq2	1.30497	4.95761	17.1492	3.45563e-05	0.00103448
comp2246985_c0_seq1	-1.91571	4.44214	17.1451	3.46308e-05	0.00103565
comp2242625_c0_seq1	5.44404	-1.92252	17.1448	3.46349e-05	0.00103565
comp2276273_c0_seq7	-1.52417	4.8469	17.1421	3.46852e-05	0.00103642
comp2224092_c0_seq1	1.80389	1.60958	17.1412	3.47005e-05	0.00103642
comp2141575_c0_seq1	3.74773	0.350616	17.137	3.47787e-05	0.00103816
comp2221987_c0_seq1	3.23525	-1.94822	17.1203	3.50857e-05	0.00104672
comp2278017_c0_seq2	-1.56196	3.13675	17.1164	3.51572e-05	0.00104825
comp2268090_c0_seq2	1.5911	1.81375	17.1039	3.53894e-05	0.00105457
comp2266864_c0_seq1	1.83977	3.37225	17.0877	3.56921e-05	0.00106298
comp2264611_c0_seq3	-1.56989	4.33848	17.0766	3.5902e-05	0.00106862
comp2252416_c0_seq1	1.75277	0.391942	17.0747	3.59378e-05	0.00106908
comp2221284_c0_seq1	6.19928	-1.05756	17.0618	3.61836e-05	0.00107577
comp1198086_c0_seq1	2.04269	2.51148	17.0514	3.63824e-05	0.00108107
gnl|Pdu_trscr_assembly_1|19046	1.73665	2.10998	17.0466	3.64745e-05	0.00108319
comp2254673_c0_seq2	-1.69123	5.45661	17.0449	3.65067e-05	0.00108352
comp2260303_c0_seq1	-4.27205	-1.7148	17.0409	3.65828e-05	0.00108455
comp2266337_c2_seq3	-1.72375	1.85036	17.0403	3.6595e-05	0.00108455
comp2276039_c1_seq1	2.20783	2.51849	17.0398	3.66037e-05	0.00108455
comp2268268_c1_seq1	-4.32819	-0.379798	17.0383	3.66328e-05	0.00108479
comp2139868_c0_seq1	-1.3923	2.40775	17.031	3.6775e-05	0.00108839
comp2253589_c1_seq2	1.26487	2.96429	17.0262	3.68668e-05	0.00109048
comp2277550_c1_seq6	1.95268	1.99846	17.0248	3.68944e-05	0.0010905
comp2249854_c0_seq1	-2.53067	2.80984	17.0241	3.69092e-05	0.0010905
comp2277811_c0_seq1	-4.32847	-0.352608	17.0228	3.69336e-05	0.0010906
comp2270158_c0_seq1	-1.86079	3.78439	17.0148	3.70891e-05	0.00109439
gnl|Pdu_trscr_assembly_1|200861	1.51835	3.01401	17.0141	3.71041e-05	0.00109439
comp2201133_c0_seq2	6.26986	-2.29191	17.0107	3.71701e-05	0.00109572
comp2237921_c0_seq1	-2.52844	-0.107336	17.0033	3.73158e-05	0.00109939
comp2142425_c0_seq1	2.82333	1.64423	16.9992	3.73964e-05	0.00110114
comp1879754_c0_seq1	-2.37272	0.947033	16.9946	3.74855e-05	0.00110314
comp2252811_c0_seq1	1.59458	1.55668	16.9864	3.76477e-05	0.00110729
comp2254390_c0_seq1	-1.3955	2.91656	16.9842	3.76915e-05	0.00110768
comp2277076_c0_seq2	1.93507	4.14029	16.9836	3.77035e-05	0.00110768
comp2256678_c0_seq1	2.776	3.36508	16.9797	3.77809e-05	0.00110933
comp2267535_c0_seq2	1.45555	1.89018	16.9763	3.785e-05	0.00111073
comp2276654_c0_seq2	1.79545	4.80763	16.9711	3.79533e-05	0.00111311
comp2249047_c0_seq1	-6.72539	-0.648239	16.9701	3.79739e-05	0.00111311
comp2266173_c0_seq2	2.47348	-1.19622	16.9619	3.81369e-05	0.00111726
comp2216167_c0_seq4	1.45574	5.47275	16.9531	3.83154e-05	0.00112186
gnl|Pdu_trscr_assembly_1|201059	-1.88529	1.99085	16.9511	3.83558e-05	0.00112241
comp2263171_c0_seq2	-3.29451	0.852167	16.9457	3.84641e-05	0.00112495
comp2250061_c0_seq1	-3.29671	-0.476832	16.9411	3.85568e-05	0.00112702
comp2228256_c0_seq1	-1.48494	2.86902	16.9344	3.86944e-05	0.00113041
comp2260094_c0_seq3	1.46331	7.42662	16.9143	3.91053e-05	0.00114177
comp2258561_c0_seq4	2.42612	2.2515	16.8916	3.95755e-05	0.00115459
comp2259381_c0_seq1	1.90304	4.38533	16.891	3.95886e-05	0.00115459
comp2277218_c1_seq5	-1.6601	4.54422	16.8816	3.97859e-05	0.0011597
comp2239091_c1_seq1	-2.78325	0.522438	16.8802	3.98142e-05	0.00115987
comp2255044_c0_seq1	-3.9055	-0.778699	16.8472	4.05136e-05	0.00117926
comp2268915_c1_seq1	-1.43654	4.5839	16.8466	4.05249e-05	0.00117926
comp2260530_c0_seq1	1.42718	1.93514	16.8432	4.05978e-05	0.00118071
comp2276202_c0_seq3	-1.35378	5.18195	16.8405	4.06561e-05	0.00118175
comp2266619_c0_seq2	2.22045	0.41039	16.8375	4.07199e-05	0.00118294
comp2139046_c0_seq1	2.47179	-0.0885847	16.8314	4.08525e-05	0.00118613
comp2250906_c0_seq2	-1.38685	8.99045	16.8266	4.09548e-05	0.001188
comp2272362_c3_seq1	-1.98425	0.655598	16.8263	4.09623e-05	0.001188
comp2271257_c1_seq1	-1.89777	5.81816	16.8215	4.10649e-05	0.00119031
comp2259627_c0_seq1	1.37773	3.7658	16.8179	4.11437e-05	0.00119151
comp2268643_c0_seq1	-2.00962	0.807104	16.8175	4.11521e-05	0.00119151
comp2269996_c0_seq1	-2.09443	2.48648	16.8111	4.12911e-05	0.00119487
comp2270868_c0_seq2	-2.95998	3.09166	16.8021	4.14869e-05	0.00119987
comp2275642_c0_seq13	1.55514	3.52639	16.7999	4.15356e-05	0.00120061
comp2252921_c0_seq4	1.91943	3.71417	16.7984	4.15678e-05	0.00120087
comp2261047_c0_seq1	-3.01734	4.86422	16.7961	4.16194e-05	0.00120146
comp2205109_c0_seq1	-1.2265	5.82781	16.7954	4.16341e-05	0.00120146
comp2279396_c0_seq1	-1.22612	5.88307	16.7924	4.1701e-05	0.00120272
comp2273266_c0_seq2	-1.65359	3.60505	16.7848	4.1868e-05	0.00120687
comp2269371_c0_seq2	-1.48963	2.42612	16.7735	4.21167e-05	0.00121337
comp2262567_c0_seq4	-2.30537	0.261127	16.7593	4.24348e-05	0.00122185
comp2271726_c1_seq1	3.45242	-1.13182	16.7411	4.28429e-05	0.00123234
comp2272645_c0_seq1	-2.29437	5.2302	16.7409	4.28464e-05	0.00123234
comp1942624_c0_seq1	5.69339	-3.0268	16.7353	4.29743e-05	0.00123534
comp2261959_c0_seq2	-2.36526	1.27207	16.7279	4.31421e-05	0.00123948
comp2254278_c0_seq1	1.89379	2.29192	16.7202	4.33169e-05	0.00124381
comp2230534_c0_seq1	2.48644	-1.44836	16.7167	4.33965e-05	0.00124533
comp1951303_c0_seq1	-1.53076	3.4178	16.7158	4.34177e-05	0.00124533
comp2277652_c0_seq4	-2.09248	6.4458	16.7145	4.3447e-05	0.00124549
comp2260244_c0_seq1	-1.68214	1.26466	16.7129	4.34854e-05	0.00124558
comp1193932_c0_seq1	2.86145	0.296555	16.7123	4.34982e-05	0.00124558
comp2242373_c0_seq1	1.82635	1.24982	16.7073	4.36128e-05	0.00124818
comp2246565_c0_seq1	-2.0303	1.16465	16.6966	4.38594e-05	0.00125455
comp2251864_c0_seq2	-1.49387	2.14388	16.694	4.39198e-05	0.00125517
comp2255160_c0_seq1	-3.08666	0.230802	16.6936	4.39295e-05	0.00125517
comp2260181_c0_seq1	-2.69525	-0.571159	16.6923	4.39599e-05	0.00125535
comp2274137_c1_seq25	-2.40366	6.40699	16.6901	4.40101e-05	0.0012561
comp2267186_c0_seq2	-1.26603	4.1762	16.6881	4.40566e-05	0.00125673
comp2276588_c0_seq4	-1.51266	2.73362	16.6766	4.43252e-05	0.0012637
comp2273149_c0_seq6	1.4777	5.72319	16.6718	4.44372e-05	0.0012662
comp2224402_c0_seq2	2.80214	-1.54704	16.66	4.47141e-05	0.00127294
comp2219607_c0_seq1	2.66133	-0.962435	16.6596	4.47226e-05	0.00127294
comp2274677_c0_seq4	-1.93104	2.75208	16.6556	4.48172e-05	0.00127494
comp2268840_c0_seq5	1.79764	3.95495	16.6515	4.49139e-05	0.00127655
comp2262226_c0_seq6	-1.41222	2.57452	16.6512	4.49228e-05	0.00127655
comp2244978_c1_seq1	-1.79736	0.851432	16.64	4.51876e-05	0.00128337
comp2264984_c0_seq1	-1.78021	2.92059	16.6345	4.53186e-05	0.00128639
comp2270800_c0_seq1	-1.38913	3.59742	16.6179	4.57169e-05	0.00129699
comp2257347_c0_seq1	-1.66154	2.02625	16.6157	4.57705e-05	0.0012978
comp2273024_c1_seq2	-2.46576	0.99259	16.6121	4.58576e-05	0.00129957
comp2270745_c0_seq7	-2.1867	0.991629	16.6103	4.59e-05	0.00130006
comp2260442_c0_seq1	2.14493	0.96922	16.6067	4.59887e-05	0.00130186
comp2250079_c0_seq2	2.15545	4.89949	16.6037	4.60604e-05	0.00130318
comp2254607_c0_seq5	-3.06991	5.92675	16.593	4.63216e-05	0.00130986
comp2244088_c0_seq2	-1.97159	0.594624	16.5914	4.63605e-05	0.00131025
comp2278135_c0_seq10	-1.20442	6.33784	16.5858	4.64982e-05	0.00131343
comp2249361_c0_seq2	-2.32371	1.23684	16.5707	4.68699e-05	0.00132321
comp2240407_c0_seq1	-1.7313	5.56615	16.5645	4.70233e-05	0.00132637
comp2264198_c0_seq1	-2.02855	0.64203	16.5641	4.70327e-05	0.00132637
comp2191855_c0_seq1	3.34629	-3.11095	16.5571	4.72072e-05	0.00133057
comp2261530_c0_seq2	1.69691	0.921302	16.5447	4.75167e-05	0.00133857
comp2279213_c0_seq1	-1.52902	7.76328	16.5356	4.77459e-05	0.00134429
comp2240536_c0_seq3	-2.66161	-0.119579	16.5211	4.81129e-05	0.0013539
comp2275543_c0_seq2	1.55798	4.47447	16.516	4.82409e-05	0.00135677
comp2275224_c0_seq3	-1.91448	4.23188	16.5124	4.83329e-05	0.00135862
comp2200203_c0_seq1	2.19573	0.96414	16.5088	4.84236e-05	0.00136043
comp2258329_c0_seq5	2.44283	1.95071	16.5057	4.85037e-05	0.00136195
comp2239022_c0_seq1	1.86935	6.18277	16.5009	4.86258e-05	0.00136464
comp2269552_c0_seq1	1.48478	6.2322	16.497	4.87277e-05	0.00136676
comp2257595_c0_seq2	-3.30998	-1.1281	16.4938	4.88107e-05	0.00136836
comp2275933_c0_seq1	-1.46581	5.32315	16.4796	4.9176e-05	0.00137786
comp2247248_c0_seq1	-2.60207	0.179103	16.4699	4.94276e-05	0.00138392
comp2273705_c0_seq7	1.79622	1.96806	16.4692	4.94456e-05	0.00138392
comp2143430_c0_seq1	-3.28277	-0.0977129	16.4635	4.95965e-05	0.00138739
comp2275875_c1_seq9	1.44339	2.40868	16.4487	4.99837e-05	0.00139748
comp2267246_c0_seq1	-6.34816	-1.97953	16.4448	5.00865e-05	0.00139845
comp2263631_c0_seq4	2.94374	-0.536586	16.4448	5.00879e-05	0.00139845
comp2258718_c0_seq1	2.20625	0.522611	16.4444	5.00992e-05	0.00139845
comp2265327_c0_seq1	-2.67077	1.14264	16.4418	5.01679e-05	0.00139962
comp2264576_c0_seq3	1.88125	3.25823	16.4322	5.04216e-05	0.00140544
comp2249043_c0_seq1	1.89099	0.951805	16.4319	5.04306e-05	0.00140544
comp2268817_c3_seq1	1.7894	1.48344	16.4269	5.05625e-05	0.00140836
comp2245288_c0_seq1	2.3709	-1.15223	16.4158	5.08585e-05	0.00141585
comp2245096_c0_seq1	-2.90243	1.66947	16.4102	5.10098e-05	0.00141931
comp2239700_c0_seq2	-2.71579	-0.19957	16.4062	5.11185e-05	0.00142157
comp2260900_c0_seq1	-2.37194	1.65794	16.4021	5.1229e-05	0.00142388
comp2236625_c0_seq1	-1.45546	8.2866	16.3998	5.12916e-05	0.00142486
comp2268347_c0_seq5	-1.52795	4.37743	16.3985	5.13248e-05	0.00142502
comp2275405_c0_seq1	1.96933	3.42571	16.3959	5.13966e-05	0.00142556
comp2269238_c0_seq1	1.37939	3.39579	16.3958	5.13991e-05	0.00142556
comp2259186_c0_seq2	-2.2618	-0.441012	16.3942	5.14437e-05	0.00142604
comp2268259_c0_seq2	-1.30166	3.24939	16.3931	5.14718e-05	0.00142606
comp2277206_c0_seq1	-1.83309	6.33662	16.3851	5.16901e-05	0.00143135
comp2261809_c0_seq1	-1.7007	1.98797	16.3775	5.18963e-05	0.0014363
comp2264838_c0_seq3	-1.16445	7.27667	16.3747	5.19743e-05	0.00143769
comp2243318_c0_seq1	1.8228	4.59066	16.3715	5.20609e-05	0.00143932
comp2252893_c0_seq1	2.39006	0.304093	16.37	5.21045e-05	0.00143976
comp2261201_c0_seq1	-1.40431	2.97273	16.3659	5.22149e-05	0.00144204
comp2246811_c0_seq5	1.99858	1.70255	16.3631	5.22927e-05	0.00144343
comp2258703_c0_seq1	3.40759	-1.8926	16.3599	5.23811e-05	0.0014451
comp2262824_c0_seq1	-2.53589	0.550798	16.3577	5.24422e-05	0.00144602
comp2276252_c0_seq1	-1.58792	2.57484	16.3467	5.27491e-05	0.00145371
comp2257131_c0_seq2	1.56897	4.94044	16.3449	5.27994e-05	0.00145433
comp2267548_c0_seq3	-1.33592	3.79168	16.336	5.30467e-05	0.00146037
comp2249886_c0_seq1	-2.28351	0.944658	16.3265	5.33125e-05	0.00146691
comp2244327_c0_seq1	-1.80469	7.6936	16.3142	5.36616e-05	0.00147574
comp2272589_c1_seq6	-1.72603	2.29513	16.3114	5.37392e-05	0.00147709
comp2269535_c0_seq6	1.59036	3.08296	16.3012	5.40286e-05	0.00148426
comp1953996_c0_seq1	-1.50495	3.29827	16.2991	5.40887e-05	0.00148513
comp2249068_c0_seq1	-5.49324	-1.84064	16.2976	5.41337e-05	0.00148558
comp2238068_c1_seq2	-2.92671	0.100411	16.2871	5.44344e-05	0.00149305
comp2249966_c0_seq3	-3.54258	-1.46089	16.2822	5.45752e-05	0.00149521
comp2276899_c1_seq2	2.38848	2.30952	16.282	5.45813e-05	0.00149521
comp2138261_c0_seq1	-2.37301	1.04405	16.2813	5.45996e-05	0.00149521
comp2269407_c0_seq2	2.23517	1.63705	16.2799	5.46412e-05	0.0014955
comp2253390_c0_seq2	-2.42328	0.141271	16.2785	5.46807e-05	0.0014955
comp2256152_c0_seq2	-2.04299	0.0793913	16.278	5.46963e-05	0.0014955
comp2243270_c0_seq1	-2.72724	-0.599657	16.2713	5.48881e-05	0.00149996
comp2274552_c0_seq10	1.65904	4.51367	16.2575	5.52915e-05	0.00151019
comp2278021_c0_seq3	-1.42947	6.47451	16.2489	5.55417e-05	0.00151623
comp2261977_c0_seq4	-1.59691	2.53084	16.2386	5.58455e-05	0.00152359
comp2278592_c0_seq3	-1.39682	3.50434	16.2376	5.5875e-05	0.00152359
comp2251682_c0_seq3	3.76518	0.447122	16.2367	5.58994e-05	0.00152359
comp2268667_c0_seq1	1.39074	2.31323	16.2349	5.59529e-05	0.00152426
comp2251960_c0_seq1	-2.98333	-0.435886	16.2337	5.59885e-05	0.00152443
comp2247483_c0_seq2	-1.38356	2.77443	16.232	5.60396e-05	0.00152502
comp2254653_c1_seq1	1.8093	-0.204734	16.2309	5.60726e-05	0.00152512
comp2263059_c1_seq1	1.95862	0.208152	16.2243	5.62676e-05	0.00152946
comp2265985_c0_seq3	-1.98132	1.79712	16.2235	5.62923e-05	0.00152946
comp2272761_c1_seq3	-2.1368	4.45366	16.2225	5.63202e-05	0.00152946
comp2265963_c0_seq2	2.32199	2.57003	16.1933	5.71948e-05	0.0015524
comp2272751_c0_seq7	-1.50717	2.42153	16.1918	5.72424e-05	0.00155288
comp2272826_c0_seq18	1.66216	5.04416	16.1852	5.74422e-05	0.00155749
comp2278009_c0_seq2	-1.97109	3.4514	16.1828	5.75142e-05	0.00155863
comp2269336_c0_seq1	-1.70665	2.73609	16.1793	5.76208e-05	0.00156034
comp2220373_c0_seq1	-4.44888	-1.55317	16.1787	5.76373e-05	0.00156034
comp2266856_c0_seq21	-2.71011	-0.0899114	16.1694	5.79235e-05	0.00156728
comp2259334_c0_seq1	-1.85384	1.14799	16.1671	5.79931e-05	0.00156816
gnl|Pdu_trscr_assembly_1|21246	2.4141	-0.630499	16.1663	5.80163e-05	0.00156816
comp2245616_c0_seq2	2.17502	0.335763	16.1633	5.81099e-05	0.00156987
comp2266341_c0_seq1	1.95353	0.888576	16.1528	5.84321e-05	0.00157776
comp2277107_c0_seq1	1.78311	3.73456	16.1501	5.85144e-05	0.00157916
comp2239871_c0_seq1	4.64918	-1.3354	16.1441	5.87026e-05	0.00158342
comp2245928_c0_seq1	-6.9816	-2.11625	16.1376	5.89017e-05	0.00158797
comp2228128_c0_seq1	-2.02226	0.4931	16.136	5.89533e-05	0.00158853
comp2225804_c0_seq1	-2.24614	1.52935	16.1291	5.91683e-05	0.0015935
comp2219827_c0_seq2	2.82839	-1.27114	16.1251	5.92928e-05	0.00159586
comp2261237_c0_seq1	-2.30818	2.43634	16.1243	5.93172e-05	0.00159586
comp2277510_c2_seq1	-1.93117	4.8256	16.1108	5.97408e-05	0.00160643
comp2214119_c0_seq1	-1.55001	2.47649	16.1069	5.98656e-05	0.00160895
comp2258981_c0_seq1	-1.84374	2.14089	16.0938	6.02813e-05	0.00161929
comp2225897_c0_seq1	-1.23671	3.76087	16.0897	6.0411e-05	0.00162194
gnl|Pdu_trscr_assembly_1|18304	-2.19656	1.75382	16.0877	6.04764e-05	0.00162208
comp2273190_c0_seq1	-1.36528	3.59979	16.0876	6.04785e-05	0.00162208
comp2251003_c0_seq1	2.59958	-1.82884	16.0615	6.13197e-05	0.00164379
comp1924294_c0_seq1	-2.60685	-0.187797	16.0503	6.16816e-05	0.00165264
comp2266819_c0_seq6	-2.84013	-0.556185	16.0481	6.17534e-05	0.00165371
comp2272910_c0_seq1	1.40139	5.14722	16.0437	6.18974e-05	0.00165672
comp1340160_c0_seq1	-2.29664	0.349358	16.0285	6.23969e-05	0.00166923
comp2146953_c0_seq1	2.71692	-1.50244	16.0219	6.26127e-05	0.00167414
comp2274822_c0_seq2	2.66624	4.00531	16.0207	6.26553e-05	0.00167442
comp2249602_c0_seq3	2.57459	1.21825	16.0092	6.30353e-05	0.00168371
comp2249778_c0_seq2	2.00831	0.567543	16.0047	6.31864e-05	0.00168688
comp2273029_c0_seq1	-2.68847	3.01433	16.0003	6.33334e-05	0.00168919
comp2275800_c0_seq2	-1.5927	6.32364	16.0001	6.33379e-05	0.00168919
comp2269326_c0_seq2	-1.13475	5.77206	15.9982	6.34032e-05	0.00169007
comp2276947_c0_seq2	-2.37854	1.53017	15.9964	6.34623e-05	0.0016907
comp2252349_c0_seq1	2.81862	0.324529	15.9955	6.34919e-05	0.0016907
comp2277065_c0_seq11	-1.85458	3.30906	15.9843	6.38698e-05	0.0016999
comp2266368_c0_seq1	1.47359	3.53334	15.9717	6.42968e-05	0.00170998
comp2268188_c0_seq3	-1.64609	2.76123	15.9712	6.43142e-05	0.00170998
comp2254176_c0_seq1	-1.66647	1.87389	15.9694	6.43744e-05	0.0017107
comp2225625_c0_seq1	4.43924	-1.92849	15.9577	6.47737e-05	0.00172044
comp2268289_c0_seq5	-1.7489	4.92719	15.9558	6.48386e-05	0.00172082
comp2270580_c1_seq3	1.73649	3.52882	15.9553	6.48545e-05	0.00172082
comp2259270_c0_seq5	-2.9169	0.460572	15.9497	6.50473e-05	0.00172506
comp2228494_c2_seq1	6.04102	-3.83522	15.9446	6.5225e-05	0.00172889
comp2273729_c0_seq3	2.31322	0.954869	15.9309	6.56987e-05	0.00174057
comp2212449_c0_seq1	-6.54643	-2.9908	15.9294	6.57488e-05	0.00174101
comp2249042_c0_seq1	2.20852	1.85322	15.9255	6.5885e-05	0.00174372
comp2232787_c0_seq1	-1.62327	1.31575	15.9237	6.59466e-05	0.00174447
comp2272118_c0_seq11	1.34441	6.47933	15.9227	6.59827e-05	0.00174454
comp2276549_c0_seq5	-1.58466	2.14822	15.9202	6.60713e-05	0.00174589
comp2261320_c0_seq9	-4.55452	-1.82938	15.9193	6.61011e-05	0.00174589
comp2261536_c0_seq1	-1.59524	3.23049	15.913	6.63214e-05	0.00175082
comp2269476_c0_seq1	2.08657	4.42534	15.9021	6.67041e-05	0.00176004
comp2204288_c0_seq1	-2.67882	0.504053	15.9007	6.67534e-05	0.00176044
comp2276498_c1_seq1	-2.62557	2.50181	15.8978	6.68566e-05	0.00176199
comp2245767_c0_seq1	2.43693	2.04362	15.8971	6.68797e-05	0.00176199
comp2272395_c0_seq1	1.76729	7.49863	15.8928	6.70334e-05	0.00176515
comp2276804_c0_seq1	1.98261	4.27346	15.8869	6.7243e-05	0.00176862
comp2262372_c0_seq1	-1.59068	1.76549	15.8866	6.72523e-05	0.00176862
comp2277639_c2_seq2	1.61162	7.00403	15.8862	6.72674e-05	0.00176862
comp2264668_c0_seq1	-1.74683	1.14217	15.8825	6.73974e-05	0.00177115
comp2140166_c0_seq1	1.16204	5.74111	15.8806	6.74669e-05	0.00177208
comp2268977_c0_seq1	1.22411	4.00566	15.8697	6.78573e-05	0.00178067
comp2259386_c0_seq1	-1.37564	2.97006	15.8695	6.78624e-05	0.00178067
comp2276780_c0_seq2	-1.17864	4.47849	15.8632	6.80882e-05	0.00178537
comp1376985_c0_seq1	2.78717	-2.11186	15.8626	6.811e-05	0.00178537
comp2263020_c0_seq1	-1.52317	2.64837	15.8582	6.827e-05	0.00178811
comp2274254_c1_seq4	-1.40723	3.30525	15.8575	6.82942e-05	0.00178811
comp2271157_c0_seq2	-1.64118	1.70282	15.8569	6.83178e-05	0.00178811
comp2263658_c0_seq3	-2.58648	4.14767	15.8528	6.84644e-05	0.00179105
comp2206709_c0_seq1	-2.45666	-0.00878353	15.8404	6.89169e-05	0.00180198
comp2259164_c0_seq2	-2.73515	0.127569	15.8359	6.90779e-05	0.00180529
comp2274756_c0_seq1	-1.46788	2.96629	15.8321	6.92174e-05	0.00180802
comp2203809_c0_seq1	-2.87176	-0.0604607	15.8252	6.94723e-05	0.00181377
comp2244716_c0_seq1	-1.58664	9.20858	15.8205	6.96442e-05	0.00181735
comp2261597_c0_seq13	1.51172	2.68887	15.8153	6.9837e-05	0.00182146
comp2270896_c0_seq2	-1.79633	1.24646	15.7939	7.06291e-05	0.0018412
comp2278988_c0_seq1	-1.65559	1.37204	15.7815	7.10934e-05	0.00185238
comp2264500_c0_seq3	1.38155	3.80482	15.7798	7.11569e-05	0.0018531
[truncated: 4,418 more rows]

## Sheet: PM_NM_Female vs M_NM_Female
	logFC	logCPM	LR	PValue	FDR
comp2257567_c0_seq1	7.39171	5.93736	253.535	4.40457e-57	2.29298e-52
comp2261851_c1_seq1	-7.3876	5.29074	217.105	3.87225e-49	1.00793e-44
comp2269662_c0_seq8	7.58436	8.84258	213.597	2.25451e-48	3.91225e-44
comp2265326_c0_seq3	-7.82426	7.37152	168.178	1.85019e-38	2.40798e-34
comp2265263_c0_seq1	7.03447	6.34179	164.575	1.13285e-37	1.1795e-33
comp2272093_c0_seq1	-5.1619	5.13846	162.068	3.99717e-37	3.46814e-33
comp2240916_c0_seq1	-6.51997	4.92009	161.53	5.2393e-37	3.89647e-33
comp2223254_c0_seq1	9.83746	5.43078	150.189	1.57661e-34	1.02596e-30
comp2256337_c0_seq2	6.26841	2.97697	146.298	1.11718e-33	6.46215e-30
comp2272343_c0_seq3	-6.28961	4.68973	128.427	9.05163e-30	4.71219e-26
comp2224089_c0_seq1	5.1837	3.91417	127.942	1.15544e-29	5.3197e-26
comp2272108_c0_seq1	4.86364	6.16472	127.824	1.22623e-29	5.3197e-26
comp2254792_c1_seq4	10.0651	8.05803	126.739	2.11894e-29	8.48538e-26
comp2234324_c0_seq2	10.9629	6.62715	123.905	8.8357e-29	3.28556e-25
isotig10568	-7.13313	6.51839	123.019	1.38099e-28	4.79285e-25
comp2258675_c0_seq3	4.92744	3.60954	122.54	1.75854e-28	5.51175e-25
comp2215885_c0_seq1	8.86108	2.79247	122.494	1.79988e-28	5.51175e-25
comp1193006_c0_seq1	9.31586	0.373835	121.989	2.32108e-28	6.71295e-25
comp2274137_c0_seq1	-5.57311	7.12682	121.763	2.60125e-28	7.1273e-25
comp2236959_c0_seq1	6.05612	4.69004	121.229	3.40504e-28	8.86314e-25
comp2281046_c0_seq1	-7.60288	2.94016	120.386	5.20631e-28	1.29064e-24
comp2278332_c0_seq1	-4.73215	4.40038	119.32	8.91386e-28	2.1093e-24
comp2250225_c0_seq2	5.14974	6.8322	114.441	1.04342e-26	2.3617e-23
comp2261980_c0_seq3	-6.76202	7.50963	113.638	1.56441e-26	3.39341e-23
comp2257715_c1_seq3	4.26152	5.86428	113.153	1.99778e-26	4.16011e-23
comp2261876_c0_seq1	-4.31549	5.12508	112.393	2.93058e-26	5.86781e-23
comp2275713_c0_seq3	5.40827	9.28827	111.854	3.84649e-26	7.41647e-23
comp2276244_c0_seq1	-3.86448	5.81839	110.339	8.25917e-26	1.53559e-22
comp2271713_c0_seq1	-6.17446	6.10047	109.913	1.02388e-25	1.83801e-22
comp2261608_c0_seq1	7.87777	6.38239	108.041	2.6326e-25	4.56835e-22
comp2262443_c0_seq1	4.64344	6.78077	107.574	3.33228e-25	5.59597e-22
comp2277995_c0_seq1	-4.03442	7.4765	106.649	5.31318e-25	8.64371e-22
comp2265751_c0_seq4	5.41038	3.4265	105.477	9.60217e-25	1.51479e-21
comp2251620_c0_seq1	-4.18094	7.38473	102.967	3.40705e-24	5.21669e-21
comp2274804_c0_seq1	-3.99401	5.19789	102.755	3.79252e-24	5.641e-21
comp2252195_c0_seq1	6.91369	3.89653	102.417	4.49797e-24	6.50444e-21
comp2254641_c1_seq1	-5.39969	4.51679	101.261	8.06204e-24	1.13433e-20
comp2271537_c0_seq19	3.63923	4.91343	99.4148	2.04783e-23	2.80548e-20
comp2277462_c0_seq1	-6.29634	1.7942	98.7713	2.8341e-23	3.78309e-20
comp2253801_c0_seq1	5.7502	3.26888	98.1082	3.9613e-23	5.15554e-20
comp2242933_c0_seq1	5.52404	9.31557	98.0147	4.1528e-23	5.27294e-20
comp2205302_c0_seq1	4.16023	3.5896	97.9238	4.34791e-23	5.38923e-20
comp2262279_c0_seq1	9.38647	8.15195	97.8584	4.49395e-23	5.44071e-20
comp2270871_c0_seq1	-6.18701	4.2809	97.7227	4.81271e-23	5.69421e-20
comp2272119_c0_seq6	4.41415	2.9051	97.4494	5.52501e-23	6.3917e-20
comp2271249_c0_seq23	6.0914	5.47995	96.7055	8.04469e-23	9.10431e-20
comp2253407_c0_seq3	-6.13396	8.57328	95.0544	1.85225e-22	2.05163e-19
comp2252193_c0_seq2	-5.47519	3.97713	93.9757	3.19414e-22	3.46424e-19
comp2209056_c0_seq1	9.98677	3.1676	93.3173	4.45476e-22	4.73286e-19
comp2232271_c0_seq1	5.7568	2.06971	92.9347	5.40472e-22	5.62729e-19
comp2277104_c0_seq3	-3.88897	6.14275	92.5607	6.52926e-22	6.66484e-19
comp2259403_c0_seq2	-5.57881	3.83382	92.4806	6.79874e-22	6.78641e-19
comp2241134_c0_seq1	-3.58199	4.785	92.4488	6.90907e-22	6.78641e-19
comp2238985_c0_seq1	-5.92469	2.68635	90.5316	1.82042e-21	1.75499e-18
comp2256943_c0_seq2	6.09857	0.184548	89.948	2.44501e-21	2.31427e-18
comp2263873_c0_seq9	-4.96997	5.50438	89.7223	2.74053e-21	2.54767e-18
comp2278464_c0_seq2	-3.55009	7.52476	88.3955	5.35921e-21	4.89465e-18
comp2275616_c0_seq2	-4.14983	4.42988	88.2816	5.6769e-21	5.09541e-18
comp2266373_c0_seq1	4.19868	1.77581	87.5774	8.10468e-21	7.15121e-18
comp2276461_c0_seq7	-4.84718	3.89542	87.3966	8.88026e-21	7.70495e-18
comp2270003_c1_seq1	5.1526	1.5458	86.5767	1.34421e-20	1.14718e-17
comp2266841_c0_seq1	-5.9831	3.6694	86.2134	1.61528e-20	1.35629e-17
comp2259529_c0_seq1	-4.12725	5.86214	85.8118	1.97903e-20	1.62348e-17
comp2273366_c2_seq1	4.3498	2.43808	85.795	1.99586e-20	1.62348e-17
comp2274374_c0_seq4	-4.45727	4.35839	84.5201	3.80335e-20	3.04613e-17
comp2280841_c0_seq1	6.49807	3.23873	84.4752	3.89063e-20	3.0497e-17
comp2221300_c0_seq1	4.56838	1.67788	84.4578	3.92496e-20	3.0497e-17
comp2268625_c0_seq3	-4.00282	3.08063	84.2406	4.3809e-20	3.3539e-17
gnl|Pdu_trscr_assembly_1|12794	-3.19508	8.426	84.1947	4.48368e-20	3.38284e-17
comp2277335_c1_seq5	3.33733	4.139	83.9539	5.06454e-20	3.7665e-17
comp2238682_c0_seq2	7.37827	2.43675	83.3242	6.96416e-20	5.1063e-17
comp2251338_c0_seq8	-4.93623	2.15876	83.2066	7.39114e-20	5.3441e-17
comp2263229_c0_seq2	-5.7034	3.50656	82.0434	1.33128e-19	9.49385e-17
comp2273249_c0_seq4	-5.79337	7.62828	81.7498	1.54456e-19	1.0866e-16
comp2254406_c0_seq1	-4.47119	2.18623	81.6165	1.65226e-19	1.14687e-16
comp2221142_c0_seq1	-5.43496	6.34025	81.4773	1.77283e-19	1.21436e-16
comp2247098_c0_seq1	-5.88992	4.37969	81.3877	1.85513e-19	1.25424e-16
comp2239858_c0_seq1	4.67947	4.73312	81.1648	2.07659e-19	1.38597e-16
comp2267077_c0_seq2	-3.47555	4.39685	81.0942	2.15215e-19	1.41821e-16
comp2244589_c0_seq2	5.13737	7.25102	79.4907	4.84505e-19	3.15285e-16
comp2251993_c0_seq1	-5.64593	2.91272	79.2062	5.59553e-19	3.59627e-16
comp2272553_c0_seq5	-3.43821	4.59328	78.4094	8.37546e-19	5.3173e-16
comp2266735_c0_seq5	-4.47651	3.09679	77.9056	1.08084e-18	6.77923e-16
comp2280824_c0_seq1	3.43851	5.28267	77.4619	1.35306e-18	8.38558e-16
comp2259786_c0_seq4	-4.00837	3.34216	76.9527	1.75104e-18	1.07244e-15
comp2268819_c2_seq1	5.7887	4.60513	76.8649	1.83058e-18	1.10812e-15
comp2265919_c1_seq23	-4.37432	5.67732	76.7926	1.89891e-18	1.13627e-15
gnl|Pdu_trscr_assembly_1|20388	-4.50489	5.87661	76.7281	1.9619e-18	1.16062e-15
comp2269234_c0_seq4	-4.28925	2.49733	76.4816	2.22274e-18	1.30016e-15
comp2267067_c0_seq8	-3.55697	4.97656	76.2232	2.53352e-18	1.46547e-15
comp2260860_c0_seq2	-3.5047	4.58786	76.1288	2.65758e-18	1.52034e-15
comp2262241_c0_seq1	-4.61194	5.3541	76.0211	2.80657e-18	1.58812e-15
comp2275893_c0_seq1	-5.76352	7.97309	75.8053	3.13066e-18	1.75246e-15
comp2271848_c0_seq8	-3.76134	4.85653	75.0402	4.61218e-18	2.55432e-15
comp2268375_c0_seq1	-3.99334	5.46666	74.6928	5.49972e-18	3.01379e-15
comp2269374_c0_seq3	-2.85776	7.46048	74.6497	5.62114e-18	3.04824e-15
comp2265937_c0_seq5	-3.09127	5.57126	74.4947	6.08028e-18	3.26323e-15
comp2251791_c0_seq2	-5.30443	3.61929	73.8627	8.37447e-18	4.44864e-15
comp2276073_c0_seq1	4.94961	1.96539	72.9368	1.33869e-17	7.03947e-15
comp2263067_c0_seq4	-3.6888	7.04781	72.8357	1.40902e-17	7.33523e-15
comp2257660_c0_seq2	-5.75679	1.63987	72.705	1.5055e-17	7.7599e-15
comp2253317_c0_seq1	3.15551	4.82694	72.6837	1.52188e-17	7.76739e-15
comp2270003_c0_seq1	5.49694	2.66843	72.5175	1.6556e-17	8.35044e-15
comp2272124_c0_seq1	-3.71625	6.1214	72.4938	1.67557e-17	8.35044e-15
comp2276940_c0_seq2	-4.28538	5.48673	72.4836	1.68424e-17	8.35044e-15
comp2258284_c0_seq4	-5.33054	3.90309	72.4188	1.74045e-17	8.54773e-15
comp2259749_c0_seq5	-3.98094	1.92226	72.3451	1.80675e-17	8.79042e-15
comp2252381_c0_seq5	-4.59892	2.29829	72.2406	1.90498e-17	9.18251e-15
comp2273601_c1_seq1	3.8072	2.592	71.816	2.36231e-17	1.12825e-14
comp2257854_c0_seq3	-3.41308	4.02159	71.4072	2.90611e-17	1.37536e-14
comp2273540_c0_seq2	-3.08879	4.48179	71.2755	3.10665e-17	1.44949e-14
comp2267304_c0_seq3	3.75494	4.92572	71.2681	3.11845e-17	1.44949e-14
comp2276838_c1_seq1	-2.58443	5.48347	71.1828	3.2561e-17	1.50008e-14
comp2254530_c0_seq1	-4.76908	4.91265	70.2705	5.17041e-17	2.36111e-14
comp2273222_c0_seq2	-4.03673	4.52729	70.1654	5.45344e-17	2.45283e-14
comp2262305_c0_seq1	-2.98985	7.12029	70.1611	5.46549e-17	2.45283e-14
comp2250762_c0_seq1	-6.04841	3.14948	69.7579	6.70486e-17	2.98332e-14
comp2261379_c0_seq1	-3.60634	11.4548	69.6266	7.16628e-17	3.1616e-14
comp2258227_c1_seq1	-4.84416	1.92498	69.0822	9.44421e-17	4.13156e-14
comp2262137_c0_seq3	-5.11058	4.38057	69.0021	9.83586e-17	4.26704e-14
comp2276498_c2_seq1	-5.40193	3.02858	68.8923	1.0399e-16	4.47408e-14
comp2245053_c0_seq1	-5.42058	2.05707	68.5875	1.21371e-16	5.15024e-14
comp2272370_c0_seq4	3.08413	3.67032	68.5824	1.21685e-16	5.15024e-14
gnl|Pdu_trscr_assembly_1|88882	4.52538	2.53671	68.5347	1.24662e-16	5.2337e-14
comp1194608_c0_seq1	3.28688	4.67432	68.5052	1.26545e-16	5.27023e-14
comp2265255_c2_seq1	-5.77027	9.64754	68.4548	1.2982e-16	5.36375e-14
comp2267060_c0_seq1	-4.22032	2.88976	68	1.63493e-16	6.70179e-14
comp2270119_c0_seq15	-4.11938	5.05787	67.4898	2.11775e-16	8.61312e-14
comp2263124_c0_seq2	4.2648	5.65084	67.3951	2.22206e-16	8.96731e-14
comp2260095_c1_seq1	4.84596	1.0617	67.3525	2.27052e-16	9.09239e-14
comp2243368_c0_seq4	-4.03723	3.65696	67.0367	2.66501e-16	1.05907e-13
comp2235052_c0_seq1	6.54477	3.52042	66.9506	2.78399e-16	1.09051e-13
comp2255923_c0_seq3	4.54129	3.62154	66.9491	2.78602e-16	1.09051e-13
comp2257070_c0_seq2	-3.37418	12.9253	66.8789	2.88713e-16	1.12165e-13
comp2272379_c0_seq9	3.70096	6.18735	66.8616	2.91255e-16	1.12314e-13
comp2276073_c1_seq1	4.6474	3.72847	66.8051	2.99725e-16	1.14731e-13
comp1769718_c0_seq1	-4.48239	4.97044	66.3488	3.77787e-16	1.43556e-13
comp2266869_c0_seq1	-4.53263	3.9903	65.9662	4.58731e-16	1.73051e-13
comp2260003_c0_seq1	4.7447	1.70551	65.878	4.79707e-16	1.79662e-13
comp2236889_c0_seq1	4.0145	0.936533	65.7694	5.06887e-16	1.88486e-13
comp2037149_c0_seq1	-5.28138	4.89475	65.5597	5.63795e-16	2.0816e-13
comp2254414_c0_seq1	2.7265	3.41034	65.3536	6.25963e-16	2.28896e-13
comp2270281_c0_seq1	-3.66497	2.06514	65.3448	6.28751e-16	2.28896e-13
comp2275310_c0_seq1	3.39272	4.87924	65.3097	6.40044e-16	2.30638e-13
comp1192611_c0_seq1	3.77204	3.30986	65.3025	6.42398e-16	2.30638e-13
comp2275024_c0_seq2	-3.23198	2.56091	65.2746	6.51559e-16	2.32325e-13
comp2259861_c0_seq1	-4.76623	1.89026	65.1557	6.92064e-16	2.4509e-13
comp2279956_c0_seq1	-4.15182	3.51825	65.0643	7.24933e-16	2.54995e-13
comp2273726_c1_seq7	-2.82825	4.54853	64.946	7.69775e-16	2.68951e-13
comp2261996_c0_seq2	-5.06446	3.71347	64.8879	7.92835e-16	2.75161e-13
comp2261795_c0_seq1	-3.71152	2.43575	64.4876	9.71424e-16	3.3491e-13
comp2202652_c0_seq2	4.11963	3.18167	64.2686	1.08561e-15	3.71815e-13
comp2277510_c0_seq2	-3.21049	4.14415	64.2277	1.10839e-15	3.77135e-13
gnl|Pdu_trscr_assembly_1|1218	2.65298	3.2937	63.9124	1.30079e-15	4.39727e-13
comp2279764_c0_seq1	-2.61274	5.99075	63.8285	1.35732e-15	4.55876e-13
comp2266185_c0_seq3	5.50812	2.2424	63.8146	1.36697e-15	4.56173e-13
comp2276498_c0_seq1	-4.7809	4.48746	63.7366	1.4222e-15	4.71582e-13
comp2274031_c0_seq3	-2.70269	4.26516	63.6825	1.4618e-15	4.81645e-13
comp2277416_c0_seq3	-4.83171	7.29419	63.6517	1.4848e-15	4.86145e-13
comp2138058_c0_seq1	-7.10019	7.1496	63.1673	1.89873e-15	6.17788e-13
comp2264636_c0_seq1	-2.44739	4.70034	63.0875	1.97726e-15	6.39343e-13
comp2266348_c1_seq2	2.99869	5.12471	63.058	2.00707e-15	6.44977e-13
comp2248059_c0_seq4	-4.13514	4.26024	62.9052	2.16895e-15	6.92721e-13
comp2256041_c0_seq1	2.94149	9.69881	62.7354	2.36428e-15	7.50501e-13
comp2282195_c0_seq2	3.29282	6.79314	62.718	2.38522e-15	7.52557e-13
comp2262537_c0_seq3	5.83936	0.390727	62.4827	2.68792e-15	8.42955e-13
gnl|Pdu_trscr_assembly_1|200732	-4.41021	8.313	62.2934	2.95915e-15	9.1912e-13
comp2269277_c0_seq3	-3.74738	7.21786	62.2888	2.9661e-15	9.1912e-13
comp2261193_c1_seq4	4.61782	0.816035	62.2058	3.09382e-15	9.47586e-13
comp2241847_c0_seq5	-4.9235	1.15812	62.2054	3.09437e-15	9.47586e-13
comp2272645_c0_seq1	-5.16358	5.2302	62.1674	3.15468e-15	9.58256e-13
comp2273340_c1_seq1	-2.96805	4.23995	62.1603	3.16602e-15	9.58256e-13
comp2269391_c0_seq1	-3.37713	3.64301	62.1452	3.1905e-15	9.60081e-13
comp2198403_c0_seq2	-4.29839	1.6985	62.1181	3.23462e-15	9.67766e-13
comp2273791_c0_seq4	3.79691	4.39159	62.0967	3.26994e-15	9.72742e-13
comp2257239_c0_seq2	-3.75445	3.30363	62.0014	3.43217e-15	1.0152e-12
comp2220452_c1_seq1	-4.69699	3.28493	61.9428	3.53588e-15	1.03997e-12
comp2268528_c0_seq2	-3.08803	3.82423	61.8782	3.65369e-15	1.06858e-12
comp2264786_c0_seq1	3.22116	3.10823	61.6798	4.041e-15	1.17525e-12
comp2265878_c0_seq2	-3.93913	2.9003	61.4865	4.45789e-15	1.2875e-12
comp2272814_c1_seq2	3.2764	6.05663	61.4783	4.4764e-15	1.2875e-12
comp2266847_c0_seq1	-4.44659	5.40858	61.465	4.50674e-15	1.2891e-12
comp2266075_c0_seq5	4.26679	3.70138	61.427	4.59474e-15	1.30709e-12
comp1193769_c0_seq1	-4.74884	3.91694	61.2129	5.12251e-15	1.44931e-12
comp2270871_c1_seq12	-4.30826	5.34003	60.832	6.21579e-15	1.74912e-12
comp2264911_c0_seq3	6.24723	3.20333	60.7142	6.5993e-15	1.84706e-12
comp2272437_c1_seq1	-3.99132	8.89848	60.5876	7.03748e-15	1.95917e-12
comp2278536_c1_seq38	-3.0907	8.80251	60.4757	7.44921e-15	2.06276e-12
gnl|Pdu_trscr_assembly_1|7284	4.88207	2.90123	60.394	7.76492e-15	2.1388e-12
comp2268687_c0_seq1	5.05065	6.58489	60.217	8.49544e-15	2.32771e-12
comp2270156_c0_seq11	-3.0511	6.53881	60.1804	8.65514e-15	2.35905e-12
comp2271649_c0_seq1	-4.90076	5.46419	60.1481	8.79808e-15	2.38552e-12
comp1267867_c0_seq1	-4.75998	2.1808	60.0134	9.4214e-15	2.54129e-12
comp2263829_c0_seq1	-7.24032	1.82397	59.9708	9.62751e-15	2.5835e-12
comp2259241_c0_seq1	3.80838	1.1569	59.8438	1.02691e-14	2.74154e-12
comp2259006_c0_seq2	-3.20465	3.6246	59.7141	1.09687e-14	2.91337e-12
comp2271225_c0_seq5	-4.0306	10.2875	59.5716	1.17925e-14	3.11626e-12
comp2239040_c0_seq1	-3.73801	1.78877	59.5436	1.19617e-14	3.14502e-12
comp2278597_c0_seq3	-3.37326	5.44091	59.5058	1.21937e-14	3.18992e-12
comp2266442_c0_seq5	-5.16016	1.46981	59.4839	1.23296e-14	3.20701e-12
comp2276174_c0_seq14	2.94973	4.12421	59.4756	1.23823e-14	3.20701e-12
comp2278099_c2_seq1	-3.54753	3.14918	59.1551	1.45721e-14	3.7555e-12
comp2235322_c0_seq1	-4.71006	2.43426	59.1236	1.4807e-14	3.79723e-12
comp2239531_c0_seq1	3.358	3.75081	59.0608	1.52872e-14	3.90116e-12
comp2274541_c0_seq1	-4.37877	9.55111	58.929	1.63469e-14	4.15124e-12
comp2229342_c0_seq1	5.24038	-1.5936	58.9113	1.64946e-14	4.16841e-12
comp2272091_c0_seq2	-3.22477	3.98223	58.7896	1.75466e-14	4.41285e-12
comp2267655_c0_seq21	3.56078	7.54362	58.7196	1.8182e-14	4.55066e-12
comp2274177_c0_seq1	-3.82927	5.88149	58.6566	1.87733e-14	4.67616e-12
comp2263706_c0_seq2	4.67655	0.552448	58.5607	1.97117e-14	4.88653e-12
comp2253186_c0_seq1	-3.5983	7.12488	58.5235	2.00877e-14	4.95614e-12
comp2278398_c0_seq2	-4.93898	3.44077	58.497	2.03599e-14	4.99143e-12
comp2278592_c0_seq3	-2.88178	3.50434	58.491	2.04225e-14	4.99143e-12
comp2265181_c0_seq1	-3.26167	5.60711	58.4742	2.05977e-14	5.01072e-12
comp2279378_c0_seq1	-5.30255	3.01709	58.4306	2.10591e-14	5.09914e-12
comp2250283_c0_seq1	7.55838	-0.864642	58.4104	2.12765e-14	5.12793e-12
comp2277060_c0_seq17	-3.87623	2.02912	58.1773	2.39529e-14	5.74638e-12
comp2277610_c1_seq3	2.74896	5.49405	58.0048	2.61473e-14	6.23902e-12
comp2273459_c1_seq1	3.841	1.94567	57.9925	2.63121e-14	6.23902e-12
comp1194411_c0_seq1	-4.00724	2.99813	57.9885	2.63659e-14	6.23902e-12
comp2262932_c1_seq1	-3.02204	2.26637	57.5843	3.23792e-14	7.62728e-12
comp2278392_c0_seq1	3.20674	5.51108	57.5356	3.31911e-14	7.78331e-12
comp1194202_c0_seq1	-3.53052	3.36752	57.5031	3.37454e-14	7.85588e-12
gnl|Pdu_trscr_assembly_1|15590	-5.61856	5.68301	57.4997	3.38023e-14	7.85588e-12
comp2272828_c0_seq8	2.84712	4.54052	57.1739	3.98932e-14	9.23022e-12
comp2253679_c0_seq3	-3.98173	5.30311	57.1574	4.02297e-14	9.2669e-12
comp2275258_c0_seq6	-2.62948	6.00561	57.083	4.17793e-14	9.58144e-12
comp2262714_c0_seq1	3.8302	2.50719	57.0301	4.29199e-14	9.79985e-12
comp2277510_c2_seq1	-3.97023	4.8256	56.9727	4.41902e-14	1.00458e-11
comp2253273_c0_seq1	-4.06049	3.45994	56.7842	4.86366e-14	1.10086e-11
comp2266311_c1_seq2	-3.98529	2.10078	56.595	5.35474e-14	1.20545e-11
comp2254367_c0_seq1	-2.75362	3.99972	56.5887	5.37205e-14	1.20545e-11
comp2257713_c0_seq1	-3.1019	2.90962	56.3366	6.10678e-14	1.36443e-11
comp2138099_c0_seq1	-4.48265	3.66855	56.1344	6.76822e-14	1.50576e-11
comp2277927_c4_seq1	-3.86866	2.65103	56.0699	6.99395e-14	1.54935e-11
comp2272698_c0_seq4	2.45641	6.84671	56.0158	7.1891e-14	1.58584e-11
comp2271992_c0_seq4	4.74358	3.21525	55.9838	7.30692e-14	1.60502e-11
comp2257264_c1_seq1	-3.51633	3.95052	55.8165	7.95612e-14	1.73626e-11
comp2271994_c0_seq2	-3.39475	12.3311	55.8128	7.97109e-14	1.73626e-11
comp2272691_c0_seq4	-4.05178	11.4286	55.7234	8.34174e-14	1.80943e-11
comp2261841_c0_seq9	-3.69103	1.61298	55.5887	8.93369e-14	1.92979e-11
comp2254383_c0_seq1	-3.82352	6.97749	55.4528	9.57324e-14	2.05939e-11
comp2274308_c0_seq1	-4.63019	2.87435	55.4111	9.77833e-14	2.09486e-11
comp2271744_c0_seq3	-3.6681	2.94846	55.3912	9.87755e-14	2.10744e-11
comp2065624_c0_seq3	-6.13085	4.32153	55.3775	9.94697e-14	2.11359e-11
comp2278436_c0_seq3	-2.47234	6.38011	55.1783	1.1008e-13	2.32954e-11
comp2270061_c0_seq1	4.48395	1.79939	54.9975	1.20684e-13	2.5436e-11
comp2277584_c0_seq5	3.20905	4.4016	54.9491	1.23692e-13	2.59649e-11
comp2141958_c0_seq2	9.06825	1.53096	54.8674	1.2894e-13	2.69578e-11
comp2259858_c0_seq2	5.84833	0.659871	54.849	1.30152e-13	2.71023e-11
comp2277776_c0_seq1	3.27072	5.34895	54.8225	1.31921e-13	2.73612e-11
comp2278373_c0_seq1	-3.34819	6.2775	54.7884	1.34228e-13	2.77293e-11
comp2253516_c0_seq4	-3.06495	11.4268	54.6333	1.4525e-13	2.98876e-11
comp2256699_c0_seq2	-4.36047	1.15441	54.6104	1.46955e-13	3.01194e-11
comp2271756_c0_seq2	4.50452	5.38343	54.5257	1.53425e-13	3.13223e-11
comp2232817_c0_seq2	3.85539	3.76246	54.437	1.60513e-13	3.26405e-11
comp2275229_c0_seq16	-3.74327	4.94184	54.4294	1.61136e-13	3.26405e-11
comp2272161_c2_seq6	-2.81427	3.96028	54.4159	1.62245e-13	3.27377e-11
comp2243104_c0_seq1	-3.95317	2.16828	54.4058	1.63078e-13	3.27788e-11
comp2273103_c0_seq8	-2.97709	4.14363	54.1363	1.87052e-13	3.74528e-11
comp1975390_c0_seq1	-3.77311	2.78196	54.0194	1.98519e-13	3.95965e-11
comp2271477_c1_seq2	-3.62894	3.8828	53.7335	2.2962e-13	4.56251e-11
comp2274043_c0_seq7	-3.82719	5.40673	53.6527	2.39255e-13	4.73589e-11
comp2259832_c0_seq2	2.91704	5.15203	53.4047	2.71451e-13	5.35284e-11
comp2267733_c0_seq1	-3.21806	8.19817	53.3207	2.83301e-13	5.56543e-11
comp2276609_c1_seq2	-5.58768	1.45749	53.3022	2.85985e-13	5.59702e-11
comp2276966_c0_seq13	-2.66735	6.64679	53.2245	2.97527e-13	5.80111e-11
comp2264193_c0_seq2	6.04452	0.85994	53.0728	3.21411e-13	6.2434e-11
comp2263702_c0_seq1	3.87448	3.30368	52.8966	3.51572e-13	6.8039e-11
comp2267710_c1_seq1	-5.24768	1.66814	52.8053	3.68303e-13	7.10128e-11
comp2221435_c0_seq3	-3.63992	4.70859	52.7589	3.77115e-13	7.24437e-11
comp2241541_c0_seq2	-2.27778	5.20365	52.7109	3.86447e-13	7.39634e-11
comp2264068_c0_seq1	-2.56514	3.99642	52.4886	4.32744e-13	8.20235e-11
comp2257281_c0_seq1	-3.67549	2.91377	52.4845	4.33656e-13	8.20235e-11
comp2264799_c1_seq2	-2.98274	3.64716	52.4811	4.34415e-13	8.20235e-11
comp2261061_c0_seq1	3.49276	1.45867	52.4791	4.34862e-13	8.20235e-11
comp2253831_c0_seq1	-3.38265	3.05881	52.4581	4.3952e-13	8.2398e-11
comp2274476_c0_seq5	-3.7036	2.16345	52.4559	4.40013e-13	8.2398e-11
comp2246491_c0_seq2	-3.32838	2.79981	52.4392	4.43779e-13	8.28053e-11
comp2272075_c0_seq4	4.2092	2.2585	52.3095	4.74087e-13	8.81447e-11
comp2275107_c0_seq4	-3.36444	6.66344	52.1819	5.05901e-13	9.3725e-11
comp2265722_c0_seq1	-3.31177	2.73952	52.1068	5.2563e-13	9.70346e-11
comp2199649_c0_seq2	-4.98116	2.06481	52.0781	5.33373e-13	9.81161e-11
comp2254640_c0_seq1	-4.38501	6.67509	52.0277	5.47239e-13	1.00312e-10
comp2273459_c0_seq2	3.92176	3.84461	51.9869	5.58718e-13	1.02057e-10
comp2278539_c0_seq2	-2.71394	10.5138	51.91	5.81036e-13	1.05763e-10
comp2268858_c0_seq10	-2.31722	5.45915	51.901	5.83711e-13	1.05879e-10
comp2278595_c0_seq12	-2.90848	5.7879	51.8712	5.92627e-13	1.07123e-10
comp2229575_c0_seq1	-2.03172	5.2021	51.8568	5.9699e-13	1.07514e-10
comp2271179_c1_seq1	-4.25224	2.41816	51.8505	5.9892e-13	1.07514e-10
comp2261415_c0_seq1	3.07731	2.16682	51.8378	6.02797e-13	1.07839e-10
comp2270224_c0_seq1	-2.49073	3.33449	51.8255	6.06587e-13	1.08145e-10
comp2265580_c1_seq5	-3.55365	2.15048	51.8115	6.10927e-13	1.08547e-10
comp2273978_c0_seq1	3.02581	5.35201	51.7304	6.36697e-13	1.12741e-10
comp1927618_c0_seq1	3.1309	2.93187	51.6719	6.55937e-13	1.15754e-10
gnl|Pdu_trscr_assembly_1|14372	-4.37613	2.52448	51.5712	6.90456e-13	1.21434e-10
comp2278108_c1_seq1	-3.21482	7.13272	51.5632	6.93282e-13	1.2152e-10
comp2265840_c0_seq3	4.33203	1.68631	51.475	7.25142e-13	1.26602e-10
comp2277945_c0_seq2	-2.5206	7.75974	51.4696	7.27139e-13	1.26602e-10
comp2256206_c0_seq2	6.47749	-1.37727	51.3722	7.64142e-13	1.32577e-10
comp2138076_c0_seq1	3.61783	3.82475	51.366	7.6655e-13	1.32577e-10
comp2256318_c0_seq1	-5.22124	2.13001	51.1976	8.35188e-13	1.4397e-10
comp2140683_c0_seq1	-4.76469	4.36032	51.1249	8.667e-13	1.48909e-10
comp2269198_c1_seq5	-2.54166	5.75489	51.0765	8.88359e-13	1.52129e-10
comp2270884_c0_seq1	-4.98881	1.08518	51.0233	9.12762e-13	1.55795e-10
comp2260302_c0_seq2	-3.91797	3.84578	50.9606	9.42397e-13	1.60328e-10
comp1281272_c0_seq1	-3.73494	4.55933	50.8876	9.78095e-13	1.65859e-10
comp2273721_c0_seq12	-2.89027	2.61388	50.8398	1.00223e-12	1.69399e-10
comp2239691_c0_seq1	-3.97439	8.78764	50.6926	1.08027e-12	1.81999e-10
comp2143340_c0_seq1	-2.9115	4.32398	50.5837	1.14189e-12	1.91629e-10
comp2275684_c0_seq21	-2.94045	2.58352	50.5734	1.14791e-12	1.91629e-10
comp2269191_c0_seq3	4.1822	3.33105	50.5692	1.15035e-12	1.91629e-10
comp2270332_c0_seq1	-4.84403	0.271149	50.5662	1.15215e-12	1.91629e-10
comp2261716_c0_seq2	-2.79223	6.90744	50.5031	1.18976e-12	1.96707e-10
comp2276437_c1_seq1	-3.14371	3.66706	50.5023	1.19024e-12	1.96707e-10
comp2266254_c0_seq1	-4.44753	3.52802	50.3956	1.25673e-12	2.07038e-10
comp2270565_c0_seq2	-2.49279	3.30787	50.3814	1.26589e-12	2.07889e-10
gnl|Pdu_trscr_assembly_1|1332	-2.367	5.76728	50.3491	1.28691e-12	2.10677e-10
comp2262932_c0_seq1	-3.75067	1.50575	50.3011	1.31877e-12	2.15216e-10
comp2270432_c0_seq1	-2.30605	6.49837	50.2546	1.35036e-12	2.19682e-10
comp2274959_c0_seq5	2.63476	6.79966	50.1992	1.38903e-12	2.2527e-10
comp2275646_c0_seq3	-2.32048	3.85344	50.1826	1.40086e-12	2.26483e-10
comp2265611_c0_seq1	-4.98633	2.31777	50.0109	1.52897e-12	2.46428e-10
comp2270868_c0_seq2	-6.19148	3.09166	49.9206	1.60097e-12	2.57237e-10
comp2254521_c0_seq3	-4.55211	3.54984	49.8759	1.63788e-12	2.62358e-10
comp2259227_c0_seq1	-2.80485	7.31625	49.8618	1.64967e-12	2.63141e-10
comp2264984_c0_seq1	-3.51925	2.92059	49.858	1.65288e-12	2.63141e-10
comp2269790_c0_seq1	-2.85065	3.08814	49.6787	1.81102e-12	2.86878e-10
comp2254586_c0_seq1	-3.51112	7.04725	49.6766	1.813e-12	2.86878e-10
comp2272761_c1_seq3	-4.16874	4.45366	49.6099	1.87566e-12	2.95894e-10
comp2267927_c0_seq4	-4.07024	1.7892	49.3772	2.11191e-12	3.3188e-10
comp2259852_c1_seq1	2.81697	3.93264	49.3729	2.11653e-12	3.3188e-10
comp2275312_c0_seq8	-4.6995	9.55449	49.191	2.32214e-12	3.63028e-10
comp2277987_c1_seq1	2.90786	6.31038	49.1483	2.37327e-12	3.69911e-10
comp2261623_c0_seq1	-4.59379	11.1304	49.136	2.38815e-12	3.70621e-10
comp2254544_c0_seq2	-5.85634	1.41622	49.1328	2.39207e-12	3.70621e-10
comp2278021_c0_seq3	-2.59133	6.47451	49.1085	2.42185e-12	3.74122e-10
comp1194290_c0_seq1	-4.6581	4.73292	49.0575	2.48564e-12	3.8284e-10
comp2272576_c1_seq4	-2.50733	4.93809	49.0442	2.5026e-12	3.84315e-10
gnl|Pdu_trscr_assembly_1|1213	3.3126	9.46197	48.9264	2.65754e-12	4.06909e-10
comp2268735_c0_seq1	-3.58264	2.15818	48.7571	2.89702e-12	4.42276e-10
comp2251605_c0_seq1	-4.52854	4.29658	48.6974	2.98656e-12	4.54612e-10
gnl|Pdu_trscr_assembly_1|212085	5.09594	-0.467361	48.4958	3.30996e-12	5.0237e-10
comp2264493_c0_seq2	-2.81261	3.51374	48.4373	3.41026e-12	5.16089e-10
comp2248585_c0_seq2	-3.29739	2.08953	48.403	3.47036e-12	5.23663e-10
comp2267260_c0_seq1	-3.32184	3.89249	48.389	3.49528e-12	5.25898e-10
comp2276143_c1_seq1	-3.78964	2.14456	48.3808	3.50996e-12	5.26586e-10
comp2269247_c0_seq1	2.57508	6.76327	48.3051	3.64811e-12	5.45738e-10
comp2268347_c0_seq5	-2.7664	4.37743	48.2411	3.76911e-12	5.62224e-10
comp2264027_c0_seq3	-3.49791	4.59381	48.2041	3.84085e-12	5.70211e-10
comp2277634_c0_seq5	-3.47006	2.06273	48.2022	3.84456e-12	5.70211e-10
comp2276258_c0_seq2	-2.26458	7.12998	48.1228	4.00346e-12	5.92092e-10
comp2278279_c1_seq4	2.87204	7.28482	48.0671	4.11884e-12	6.07429e-10
comp2241744_c0_seq2	-3.34266	3.23725	47.9953	4.27236e-12	6.28291e-10
comp2236891_c0_seq1	-2.84228	2.80554	47.9733	4.32056e-12	6.33588e-10
comp2272387_c1_seq3	-2.97245	2.46156	47.9516	4.36867e-12	6.38845e-10
comp2275669_c0_seq15	-2.58777	3.72362	47.8766	4.53914e-12	6.61468e-10
comp2138612_c0_seq1	-4.40602	2.91064	47.8724	4.54879e-12	6.61468e-10
comp2272870_c0_seq2	4.18615	1.97089	47.8026	4.71358e-12	6.83521e-10
comp2219247_c0_seq1	4.2088	0.988112	47.7562	4.8266e-12	6.97967e-10
comp2276761_c0_seq5	-3.29487	2.9632	47.5716	5.30306e-12	7.64301e-10
comp2269333_c0_seq9	-2.97036	2.85183	47.5673	5.31468e-12	7.64301e-10
comp2269927_c0_seq1	-4.23434	1.53468	47.5618	5.3297e-12	7.64349e-10
comp2277084_c2_seq1	-4.68666	2.59165	47.5214	5.44069e-12	7.78124e-10
comp2278398_c1_seq3	-5.78128	0.755944	47.5074	5.47974e-12	7.81561e-10
comp2244623_c0_seq1	-4.22676	1.16668	47.3376	5.9754e-12	8.49928e-10
comp2277724_c0_seq10	-2.69543	5.6681	47.1572	6.55161e-12	9.29347e-10
comp2261501_c0_seq1	-3.23865	3.84797	47.1332	6.63239e-12	9.38249e-10
comp2252790_c0_seq1	-4.39702	7.0575	47.111	6.70796e-12	9.46368e-10
comp2276661_c0_seq2	-2.93641	5.21285	47.09	6.77993e-12	9.53936e-10
comp2245797_c0_seq4	-9.65114	0.434743	47.0732	6.83845e-12	9.59577e-10
comp2278479_c1_seq28	-2.73092	8.25638	46.9024	7.46116e-12	1.04414e-09
comp2266416_c0_seq4	-3.23352	1.62058	46.8451	7.68263e-12	1.07225e-09
comp2265327_c0_seq1	-4.61593	1.14264	46.8243	7.76449e-12	1.08078e-09
comp2198797_c0_seq2	-9.51335	-0.017236	46.7301	8.14664e-12	1.13095e-09
comp2260463_c0_seq3	-4.05356	1.36568	46.7128	8.21905e-12	1.13797e-09
comp2265656_c0_seq3	-3.19389	6.93709	46.6978	8.28209e-12	1.14365e-09
comp2240347_c0_seq3	3.93888	2.16656	46.6853	8.33531e-12	1.14796e-09
comp2275652_c0_seq2	-2.60529	4.10733	46.5743	8.821e-12	1.21128e-09
comp2142807_c0_seq1	-3.45649	4.93834	46.5697	8.84161e-12	1.21128e-09
comp2274947_c0_seq3	-2.96474	2.80569	46.5637	8.86893e-12	1.21183e-09
comp2256930_c1_seq1	-3.61145	1.12019	46.5068	9.13021e-12	1.24427e-09
comp2269108_c0_seq5	2.84735	0.981596	46.4997	9.1633e-12	1.24552e-09
comp2272098_c0_seq6	-4.60065	2.09217	46.4915	9.20147e-12	1.24745e-09
comp2271448_c1_seq3	-3.54785	2.84516	46.4432	9.43122e-12	1.27527e-09
comp2249058_c0_seq2	-3.34881	5.09782	46.2956	1.01694e-11	1.37153e-09
comp2276588_c0_seq4	-2.81099	2.73362	46.2418	1.04521e-11	1.406e-09
comp2273202_c0_seq1	4.44858	-0.0135399	46.164	1.08758e-11	1.45923e-09
comp2276293_c1_seq2	-3.09939	5.3506	46.064	1.14454e-11	1.53172e-09
comp2261881_c0_seq2	-2.40579	3.35353	46.0354	1.16133e-11	1.55019e-09
comp2256237_c0_seq1	-5.51037	2.41508	46.0034	1.18047e-11	1.57171e-09
comp2269751_c0_seq2	2.91895	2.77427	45.9917	1.18756e-11	1.57712e-09
comp2265590_c1_seq4	-3.53838	2.5763	45.8305	1.28939e-11	1.708e-09
comp2261491_c0_seq1	-3.88781	6.62163	45.7448	1.34709e-11	1.7799e-09
comp2266374_c0_seq1	-4.24953	2.8915	45.7394	1.35077e-11	1.78024e-09
comp2256095_c0_seq1	-4.36734	1.73282	45.7003	1.37801e-11	1.81013e-09
comp2250610_c0_seq2	-4.81656	2.22913	45.6969	1.3804e-11	1.81013e-09
comp2268869_c0_seq6	-4.09225	3.81103	45.6608	1.40608e-11	1.83918e-09
comp2275017_c0_seq4	3.65351	3.17281	45.6446	1.41774e-11	1.84978e-09
comp2275883_c1_seq1	2.94285	4.6496	45.6252	1.43186e-11	1.86353e-09
comp2138995_c0_seq1	3.60394	2.29118	45.6085	1.44414e-11	1.87482e-09
comp2274563_c1_seq9	2.23323	4.25241	45.5609	1.47966e-11	1.91616e-09
comp2254433_c0_seq1	-4.30255	3.01064	45.4933	1.53158e-11	1.97848e-09
comp2277992_c0_seq1	3.13456	4.6553	45.4696	1.55022e-11	1.99587e-09
comp2267731_c0_seq5	-3.60165	2.0282	45.4665	1.55271e-11	1.99587e-09
comp2273152_c0_seq2	2.09912	5.19464	45.4591	1.5586e-11	1.9985e-09
comp2271273_c0_seq2	-3.31666	2.37751	45.3006	1.68994e-11	2.16159e-09
comp2252936_c1_seq1	2.6862	4.28104	45.0623	1.90864e-11	2.43534e-09
comp2267868_c0_seq12	-3.65592	1.69862	45.0071	1.96321e-11	2.49885e-09
comp2207445_c0_seq1	-8.54919	-0.434221	44.9951	1.97529e-11	2.50808e-09
comp2267356_c1_seq8	-2.68222	3.38892	44.9475	2.02393e-11	2.56359e-09
comp2267710_c0_seq1	-7.61845	1.40519	44.8929	2.08113e-11	2.62964e-09
comp2269060_c1_seq1	-3.6418	6.49553	44.8691	2.10657e-11	2.65535e-09
comp2266909_c1_seq3	3.01888	2.83067	44.7888	2.19476e-11	2.75983e-09
comp2260291_c0_seq1	-3.87187	6.94211	44.7795	2.2052e-11	2.76627e-09
comp2139590_c0_seq1	2.58467	3.75106	44.7307	2.26084e-11	2.82608e-09
comp2246453_c0_seq1	-3.80416	4.18295	44.7282	2.26373e-11	2.82608e-09
comp2254637_c0_seq1	-3.44065	1.98989	44.679	2.32135e-11	2.89108e-09
comp2278488_c0_seq1	-3.40991	3.76158	44.5632	2.46279e-11	3.05992e-09
comp2254377_c0_seq1	5.71161	-0.643742	44.5128	2.52705e-11	3.13228e-09
comp2259280_c0_seq3	4.92561	0.945067	44.4195	2.65032e-11	3.27727e-09
comp2278168_c0_seq13	-2.32132	3.46355	44.3245	2.78214e-11	3.42637e-09
comp2275270_c0_seq2	3.009	7.8946	44.3231	2.78406e-11	3.42637e-09
comp2271431_c0_seq28	-2.83629	6.66347	44.3096	2.8034e-11	3.44203e-09
comp2273767_c0_seq1	-2.61842	3.58079	44.2851	2.83873e-11	3.47721e-09
comp2266781_c0_seq2	-4.81574	2.62809	44.2277	2.92322e-11	3.57166e-09
comp2261649_c0_seq2	-3.39076	2.31486	44.2234	2.92955e-11	3.57166e-09
comp2276171_c4_seq1	-2.75825	3.69469	44.2147	2.94262e-11	3.57921e-09
comp2276273_c0_seq7	-2.57751	4.8469	44.1912	2.97819e-11	3.61402e-09
comp2251106_c0_seq1	-4.13596	9.33986	44.1795	2.9961e-11	3.62307e-09
comp2270000_c0_seq4	3.9613	4.54323	44.1772	2.99956e-11	3.62307e-09
comp2275031_c2_seq2	-4.22765	2.10686	44.1355	3.06411e-11	3.69247e-09
comp2273595_c0_seq1	-3.26134	4.81815	44.0857	3.14305e-11	3.77681e-09
comp2271960_c0_seq6	-4.02688	2.86491	44.0823	3.14861e-11	3.77681e-09
comp2197826_c0_seq1	2.91177	2.26796	43.9836	3.31134e-11	3.96288e-09
gnl|Pdu_trscr_assembly_1|16743	-4.19831	1.79146	43.9776	3.32154e-11	3.96596e-09
comp2275743_c0_seq2	2.3343	6.43651	43.9551	3.35996e-11	4.00266e-09
comp1949817_c0_seq2	-5.21919	0.604817	43.9354	3.39386e-11	4.03382e-09
comp2265229_c0_seq2	-3.94029	3.49607	43.8735	3.50308e-11	4.15414e-09
comp2271737_c1_seq2	-3.4161	5.52279	43.8116	3.6155e-11	4.27771e-09
comp2258876_c0_seq1	-5.54921	1.12762	43.7947	3.64685e-11	4.30502e-09
comp2274295_c0_seq2	-3.05199	6.81572	43.7822	3.6703e-11	4.3229e-09
comp2273537_c0_seq3	-2.79636	2.45956	43.7237	3.78171e-11	4.44407e-09
comp2268979_c0_seq1	2.43405	4.57511	43.5875	4.05414e-11	4.75348e-09
comp2259694_c0_seq2	-3.84493	1.78892	43.5638	4.10368e-11	4.80075e-09
comp2270561_c0_seq2	2.98983	3.80083	43.5507	4.13114e-11	4.81727e-09
comp2278583_c0_seq1	-2.194	4.27026	43.5483	4.13631e-11	4.81727e-09
comp2261362_c0_seq2	-3.35765	4.89245	43.5144	4.20846e-11	4.89037e-09
comp2232850_c0_seq1	5.68539	-1.6424	43.4824	4.27779e-11	4.95986e-09
comp2274581_c1_seq6	-2.14437	5.13908	43.4374	4.37749e-11	5.06417e-09
comp2267039_c0_seq7	-3.3306	2.54392	43.2884	4.72381e-11	5.4527e-09
comp2271575_c0_seq13	-2.88713	4.39165	43.2227	4.88515e-11	5.62646e-09
comp2276230_c0_seq1	-2.94843	3.25676	43.1583	5.04861e-11	5.80189e-09
comp2276124_c0_seq3	3.05465	6.1381	43.054	5.32485e-11	6.10587e-09
comp2276664_c0_seq46	2.80782	8.21489	42.9992	5.47636e-11	6.26579e-09
comp2263959_c0_seq1	-2.93595	4.51227	42.9332	5.66416e-11	6.46646e-09
comp2275291_c1_seq1	-3.22567	3.40496	42.9117	5.72674e-11	6.52359e-09
comp2277898_c0_seq9	-4.51383	2.5031	42.851	5.90719e-11	6.71447e-09
comp2266805_c1_seq1	-3.05099	1.55528	42.824	5.98942e-11	6.78516e-09
comp2274336_c0_seq18	3.29331	0.181766	42.822	5.99545e-11	6.78516e-09
comp2266989_c0_seq3	-2.54198	4.02619	42.815	6.01693e-11	6.7947e-09
comp2268964_c0_seq1	-2.88144	4.11296	42.7869	6.10409e-11	6.8782e-09
comp2276609_c0_seq2	-2.18626	4.09591	42.7665	6.16782e-11	6.935e-09
comp2254647_c0_seq2	2.27112	5.32351	42.7431	6.2421e-11	7.00339e-09
comp2270985_c1_seq1	-3.46056	6.20269	42.7235	6.305e-11	7.05876e-09
comp2256031_c0_seq1	-6.41813	0.711461	42.7093	6.35094e-11	7.09493e-09
comp2236094_c0_seq1	-3.86393	1.40501	42.6244	6.63279e-11	7.39393e-09
comp2267157_c0_seq3	4.20675	3.62802	42.4804	7.13923e-11	7.94148e-09
comp2244199_c0_seq1	-2.57232	3.52187	42.3635	7.57915e-11	8.41286e-09
comp1194190_c0_seq1	-2.41176	2.60845	42.3475	7.64154e-11	8.46407e-09
gnl|Pdu_trscr_assembly_1|264488	4.62089	-1.54231	42.2495	8.0339e-11	8.87976e-09
comp2242039_c0_seq2	-9.49744	0.0945388	42.0839	8.74408e-11	9.64424e-09
comp2272749_c1_seq3	-2.0137	4.31364	42.0603	8.84997e-11	9.7404e-09
comp2276307_c0_seq1	-2.74523	4.11137	42.0288	8.99412e-11	9.87817e-09
comp2275636_c0_seq4	-3.82505	2.5058	42.0023	9.11653e-11	9.99153e-09
comp2274999_c0_seq4	-3.2458	6.73371	41.9585	9.32323e-11	1.01966e-08
comp2254643_c0_seq2	-2.68102	9.61038	41.8721	9.74438e-11	1.06349e-08
comp2277112_c0_seq4	-2.74301	5.31025	41.8055	1.0082e-10	1.098e-08
comp2255734_c1_seq9	-3.89246	2.38625	41.8015	1.01028e-10	1.098e-08
comp2263612_c1_seq1	-3.85856	4.76323	41.7484	1.03808e-10	1.12587e-08
comp2213506_c0_seq1	-3.20744	2.90297	41.7202	1.05318e-10	1.13944e-08
comp2276667_c0_seq4	-2.55019	2.82143	41.7168	1.05498e-10	1.13944e-08
comp2275684_c1_seq2	-2.52225	3.83343	41.6656	1.083e-10	1.16728e-08
comp2274474_c0_seq5	-2.10901	6.32463	41.6202	1.10844e-10	1.19224e-08
comp2271417_c0_seq5	2.49225	2.81633	41.5949	1.12285e-10	1.20525e-08
comp2277656_c1_seq1	-3.96471	3.41526	41.5588	1.14378e-10	1.22519e-08
comp2257701_c0_seq1	-3.39026	1.64116	41.4777	1.19226e-10	1.27449e-08
comp2269064_c0_seq7	2.95324	2.39561	41.4646	1.20024e-10	1.2804e-08
comp2277638_c0_seq1	-2.63979	4.86815	41.4568	1.20504e-10	1.28288e-08
comp2195994_c0_seq1	-5.23199	1.25853	41.4259	1.22427e-10	1.3007e-08
comp2234453_c0_seq2	-3.76962	3.78243	41.3863	1.24928e-10	1.32456e-08
comp2259310_c0_seq2	6.03266	-0.649431	41.3738	1.25729e-10	1.32807e-08
comp2265034_c2_seq3	-2.61551	3.42851	41.3732	1.25768e-10	1.32807e-08
comp2228733_c0_seq1	-9.22187	-0.248812	41.3363	1.28166e-10	1.34859e-08
comp2262831_c1_seq1	-2.63582	4.71549	41.3353	1.2823e-10	1.34859e-08
comp2249062_c0_seq1	-2.60856	5.23627	41.3307	1.28534e-10	1.34906e-08
comp2210398_c0_seq1	5.02167	0.0879328	41.3075	1.30072e-10	1.36246e-08
comp2277745_c0_seq2	-1.98568	4.59502	41.3014	1.30473e-10	1.36391e-08
comp2255868_c0_seq1	3.00076	1.01509	41.2885	1.31339e-10	1.36972e-08
comp2247091_c1_seq1	-5.50955	2.41532	41.2853	1.31555e-10	1.36972e-08
comp2220966_c1_seq1	-3.19162	4.44696	41.2496	1.33979e-10	1.39218e-08
comp2236259_c0_seq1	-2.44867	9.56399	41.2034	1.37181e-10	1.42261e-08
comp2200316_c0_seq1	2.65388	4.73646	41.1705	1.39515e-10	1.44394e-08
comp2271818_c0_seq1	3.17282	2.98857	41.1632	1.40038e-10	1.44647e-08
comp2248412_c0_seq1	-5.12982	-0.361295	41.136	1.41996e-10	1.46379e-08
comp2276390_c2_seq3	2.12948	6.09093	41.0563	1.47908e-10	1.52173e-08
comp2273413_c0_seq1	-2.48315	5.77862	41.01	1.5145e-10	1.5551e-08
comp2246299_c0_seq1	3.69919	1.34582	40.9866	1.53274e-10	1.57073e-08
comp2276146_c0_seq2	-2.04121	5.41013	40.8947	1.60653e-10	1.64311e-08
comp2272717_c1_seq3	-2.72337	3.4172	40.8513	1.64265e-10	1.67676e-08
comp2254568_c0_seq1	-3.34665	2.18881	40.8035	1.6833e-10	1.71489e-08
comp2260613_c0_seq2	-2.9471	2.31271	40.7775	1.70586e-10	1.73448e-08
comp2259648_c0_seq1	-5.26245	0.756458	40.6931	1.78113e-10	1.80631e-08
comp2265493_c0_seq1	-1.88345	6.69012	40.6906	1.78344e-10	1.80631e-08
comp2276746_c0_seq7	-2.16611	5.51456	40.6777	1.79525e-10	1.81473e-08
comp2257746_c0_seq2	-3.34836	2.97782	40.6434	1.82702e-10	1.84327e-08
comp2276498_c1_seq1	-4.42103	2.50181	40.5895	1.87814e-10	1.89118e-08
comp2200430_c0_seq3	-2.47063	3.0783	40.5363	1.93e-10	1.93965e-08
comp2256831_c0_seq1	-3.07092	3.66835	40.5143	1.95181e-10	1.95779e-08
gene19	3.6142	1.23873	40.4711	1.99549e-10	1.99775e-08
comp2269322_c0_seq1	-3.13628	3.74538	40.3374	2.1368e-10	2.13512e-08
comp2272168_c0_seq4	-2.57833	4.35791	40.3099	2.16705e-10	2.16119e-08
comp2260546_c0_seq1	2.77568	2.87622	40.2894	2.18995e-10	2.17986e-08
comp2016072_c0_seq1	-3.65456	1.88014	40.2812	2.19913e-10	2.18482e-08
comp2214176_c0_seq1	-2.93322	2.06841	40.1914	2.30257e-10	2.28323e-08
comp2263988_c0_seq8	-2.43173	4.13285	40.1732	2.32413e-10	2.30023e-08
comp2277510_c3_seq1	-2.46338	2.4824	40.166	2.33273e-10	2.30436e-08
comp2273607_c0_seq2	-4.5922	1.00615	40.1345	2.37067e-10	2.3374e-08
comp2263828_c0_seq2	-5.69774	1.21971	40.1131	2.3968e-10	2.3587e-08
comp2249854_c0_seq1	-4.29655	2.80984	40.0836	2.43323e-10	2.39003e-08
comp2259382_c0_seq2	-2.77452	3.71338	40.0756	2.44328e-10	2.39538e-08
comp2273570_c0_seq3	-2.17979	2.99757	40.0288	2.5024e-10	2.44873e-08
comp2247474_c0_seq3	-3.53254	5.79401	39.9894	2.55346e-10	2.49401e-08
comp2266966_c1_seq7	4.01017	7.48941	39.9685	2.58089e-10	2.51608e-08
comp1945561_c0_seq2	-3.04105	7.88121	39.9132	2.655e-10	2.58349e-08
comp2257556_c0_seq4	-3.36912	2.99086	39.9033	2.66851e-10	2.59179e-08
comp2256950_c0_seq1	-5.94164	-0.130806	39.8785	2.70266e-10	2.62007e-08
comp2274492_c0_seq6	-3.36763	1.50742	39.8614	2.72635e-10	2.63812e-08
comp2271287_c1_seq1	-4.47355	1.20279	39.8454	2.7488e-10	2.65492e-08
comp2271913_c0_seq11	-2.689	5.42741	39.8008	2.81235e-10	2.71126e-08
comp2266106_c0_seq2	2.49609	4.02021	39.7921	2.82491e-10	2.71833e-08
comp2274631_c0_seq3	-3.69634	1.91075	39.7823	2.83907e-10	2.72692e-08
comp2260578_c1_seq1	4.89503	-1.75061	39.7562	2.87725e-10	2.7585e-08
comp2257031_c0_seq2	-3.37185	3.89487	39.7392	2.90241e-10	2.77636e-08
comp2276667_c1_seq1	-4.24861	0.982464	39.7364	2.90654e-10	2.77636e-08
comp2267968_c0_seq2	-4.72418	10.0853	39.7199	2.9312e-10	2.79479e-08
comp2262017_c0_seq2	-3.02841	2.65603	39.613	3.09615e-10	2.94666e-08
comp2216809_c0_seq2	-4.08578	0.811186	39.5455	3.20512e-10	3.04045e-08
comp2276343_c0_seq1	-2.09657	5.40668	39.5432	3.20885e-10	3.04045e-08
comp2262980_c0_seq1	-4.24019	3.34923	39.5411	3.21221e-10	3.04045e-08
comp2246635_c0_seq1	-3.75909	1.9533	39.5365	3.21986e-10	3.04215e-08
comp2274390_c0_seq1	-2.24549	3.13446	39.461	3.34679e-10	3.15635e-08
comp2246432_c0_seq1	-3.73099	3.45319	39.4452	3.37396e-10	3.17622e-08
comp2277913_c1_seq2	-4.79512	2.37814	39.441	3.38129e-10	3.17738e-08
gnl|Pdu_trscr_assembly_1|19790	-2.37336	2.99673	39.425	3.40903e-10	3.19767e-08
comp2257429_c0_seq1	-2.75672	2.18493	39.407	3.44067e-10	3.21979e-08
comp2273919_c0_seq1	2.54691	5.54772	39.4045	3.44499e-10	3.21979e-08
comp2246233_c0_seq2	-2.73428	4.11617	39.3899	3.47094e-10	3.2336e-08
comp2270986_c0_seq3	3.65517	0.599684	39.3892	3.47218e-10	3.2336e-08
comp2268904_c0_seq2	-3.95765	1.80309	39.3633	3.51851e-10	3.27089e-08
comp2266660_c0_seq2	4.6825	-0.845585	39.3388	3.56293e-10	3.30629e-08
comp2265966_c0_seq2	3.29463	3.22923	39.2385	3.75074e-10	3.47438e-08
comp2252902_c0_seq1	4.53124	-0.616181	39.2315	3.76419e-10	3.48064e-08
comp2269996_c0_seq1	-3.38609	2.48648	39.2115	3.80303e-10	3.51032e-08
comp2277206_c0_seq1	-2.9815	6.33662	39.19	3.84513e-10	3.54289e-08
comp2276641_c0_seq2	3.04217	6.71912	39.1756	3.87348e-10	3.56271e-08
comp2266208_c1_seq3	-2.8159	1.99294	39.1392	3.94647e-10	3.62344e-08
comp2270387_c0_seq54	1.87785	5.01921	39.1055	4.01517e-10	3.67165e-08
comp2257543_c0_seq2	2.74666	3.78405	39.1014	4.02364e-10	3.67165e-08
comp2268336_c0_seq2	-2.55672	4.54859	39.1007	4.02501e-10	3.67165e-08
comp2238294_c0_seq3	-8.44921	-0.56359	39.0966	4.03346e-10	3.67165e-08
gnl|Pdu_trscr_assembly_1|13616	-2.98982	2.68677	39.0962	4.03424e-10	3.67165e-08
comp2261079_c0_seq1	-4.18697	5.35207	38.997	4.24453e-10	3.8563e-08
comp2271444_c1_seq4	-2.60215	7.97568	38.9639	4.31711e-10	3.91541e-08
comp2268968_c0_seq3	-2.15207	2.93438	38.9513	4.34516e-10	3.934e-08
comp2257617_c0_seq6	3.34657	4.17928	38.9396	4.37134e-10	3.95083e-08
comp2272270_c0_seq1	3.65087	-0.0475859	38.9169	4.42245e-10	3.9901e-08
comp2234282_c0_seq1	2.72168	5.73055	38.8187	4.65061e-10	4.18868e-08
comp2267412_c0_seq1	-4.31491	0.863279	38.778	4.74849e-10	4.26946e-08
comp2272964_c0_seq1	-3.72258	2.15787	38.7607	4.7908e-10	4.30007e-08
comp2221095_c0_seq1	-4.33025	4.01834	38.6993	4.94398e-10	4.42992e-08
comp1192934_c0_seq1	3.70888	2.28629	38.6406	5.09487e-10	4.5558e-08
comp2252998_c0_seq2	3.56158	3.75172	38.6372	5.10357e-10	4.5558e-08
comp2266776_c0_seq2	2.69141	3.31823	38.6345	5.11072e-10	4.5558e-08
comp2251943_c0_seq1	-5.78922	1.37513	38.5317	5.38707e-10	4.78834e-08
comp2252042_c0_seq1	-2.71011	1.90216	38.5307	5.38998e-10	4.78834e-08
comp2258211_c0_seq1	4.53296	-0.839293	38.5196	5.42053e-10	4.80191e-08
comp2278252_c0_seq1	-2.20508	5.57575	38.5185	5.4237e-10	4.80191e-08
comp2272566_c1_seq3	-2.13004	4.32418	38.5063	5.45781e-10	4.82391e-08
comp2261998_c0_seq2	-3.10686	3.43868	38.4695	5.56156e-10	4.90727e-08
comp2274137_c1_seq25	-3.93636	6.40699	38.3958	5.77555e-10	5.08747e-08
comp2264517_c0_seq6	2.49917	2.34486	38.3807	5.82058e-10	5.11847e-08
comp2274909_c0_seq7	-3.49039	12.9761	38.3722	5.84596e-10	5.13212e-08
comp2261344_c0_seq3	2.26739	3.80383	38.2899	6.09782e-10	5.34422e-08
comp2276978_c1_seq1	-3.28422	3.16986	38.2721	6.15376e-10	5.38418e-08
comp2277282_c0_seq11	3.19102	9.32057	38.2651	6.1756e-10	5.39422e-08
comp1984701_c0_seq1	-2.03758	5.49228	38.2354	6.27042e-10	5.46787e-08
comp2259130_c0_seq2	-5.82833	-0.289259	38.2182	6.32589e-10	5.50701e-08
comp2271186_c0_seq2	-2.4348	6.07953	38.2007	6.38309e-10	5.54754e-08
comp2270158_c0_seq1	-2.96516	3.78439	38.1593	6.51989e-10	5.65698e-08
comp2197371_c0_seq1	6.32832	-0.644088	38.1131	6.6761e-10	5.78288e-08
comp2278580_c0_seq11	-1.957	3.80179	38.0235	6.98979e-10	6.04099e-08
comp2248955_c0_seq1	5.33466	0.503731	38.0214	6.99729e-10	6.04099e-08
comp1981288_c0_seq1	-2.10575	3.16252	38.0099	7.03859e-10	6.06659e-08
comp2262051_c0_seq1	-3.83821	1.70539	37.9374	7.30525e-10	6.28601e-08
comp2266986_c0_seq3	-6.13876	2.90894	37.9203	7.36952e-10	6.33086e-08
comp2253194_c0_seq3	3.70059	-0.788813	37.8969	7.45838e-10	6.39664e-08
comp2266655_c0_seq4	-3.26727	2.66271	37.7933	7.86533e-10	6.73456e-08
comp2246956_c0_seq1	-2.7254	2.61846	37.7892	7.88164e-10	6.73745e-08
comp2263225_c0_seq10	3.24994	0.784878	37.7458	8.05889e-10	6.87767e-08
comp2271349_c0_seq1	-2.62698	4.90137	37.7121	8.19948e-10	6.9862e-08
comp2272684_c0_seq6	-2.28191	3.64186	37.6382	8.51611e-10	7.24412e-08
comp2240664_c0_seq1	-3.70768	3.27743	37.6245	8.57622e-10	7.27819e-08
comp2254493_c0_seq1	-4.09054	1.76717	37.6227	8.58412e-10	7.27819e-08
comp2269151_c0_seq2	3.3153	0.911324	37.6052	8.66114e-10	7.33155e-08
comp2254385_c0_seq3	-3.34368	1.56482	37.5906	8.72634e-10	7.37475e-08
comp1665789_c0_seq1	-5.88542	1.09754	37.5791	8.77817e-10	7.40653e-08
comp2278099_c1_seq2	-1.893	5.63184	37.5411	8.95054e-10	7.53974e-08
comp2272472_c0_seq5	2.33314	2.618	37.534	8.98313e-10	7.55497e-08
comp2272968_c0_seq3	-4.46183	1.55246	37.5237	9.03102e-10	7.583e-08
comp2266609_c1_seq11	-2.59652	3.49184	37.4877	9.19924e-10	7.7118e-08
comp2241228_c0_seq2	-2.78488	5.2411	37.4772	9.24872e-10	7.74082e-08
comp2245203_c0_seq1	3.52755	1.61442	37.4545	9.35696e-10	7.81885e-08
comp2278587_c0_seq14	-2.6383	8.93364	37.3979	9.63263e-10	8.0363e-08
comp2272319_c0_seq24	2.72082	10.018	37.3863	9.69007e-10	8.07129e-08
comp2248034_c0_seq1	-3.89498	0.822968	37.382	9.71123e-10	8.07599e-08
comp1291245_c0_seq1	-5.3021	1.21594	37.3649	9.79694e-10	8.13427e-08
comp2257653_c0_seq2	-3.36507	1.73993	37.35	9.87209e-10	8.18362e-08
comp2193521_c0_seq1	-5.73857	-0.0715603	37.3426	9.90944e-10	8.20151e-08
comp2274934_c0_seq9	-2.1167	6.71185	37.3288	9.98017e-10	8.24695e-08
comp2257310_c0_seq1	-3.3466	1.28203	37.3179	1.00359e-09	8.26679e-08
comp2262137_c0_seq4	-2.65041	7.20717	37.3179	1.00359e-09	8.26679e-08
gnl|Pdu_trscr_assembly_1|1057	-2.26576	4.63444	37.2872	1.01951e-09	8.38466e-08
comp2241507_c0_seq1	-4.01932	2.77819	37.2683	1.02945e-09	8.45303e-08
comp2142646_c0_seq4	-3.76312	9.36324	37.2409	1.04402e-09	8.55913e-08
comp2246102_c0_seq1	-4.46379	1.37579	37.2061	1.06279e-09	8.69936e-08
comp2278052_c1_seq2	-1.99903	6.63321	37.1862	1.0737e-09	8.76141e-08
comp2252994_c0_seq2	-4.66241	0.41016	37.1861	1.07374e-09	8.76141e-08
comp2273154_c0_seq3	2.50801	3.32437	37.1785	1.07797e-09	8.78219e-08
comp2227194_c1_seq1	-3.74328	1.22749	37.1675	1.08405e-09	8.8179e-08
comp2273628_c0_seq6	-1.77954	5.56319	37.1502	1.09374e-09	8.87447e-08
comp2264685_c0_seq2	-3.52145	3.06236	37.1465	1.0958e-09	8.87447e-08
comp2277368_c0_seq3	-2.57275	5.25284	37.1459	1.09612e-09	8.87447e-08
comp2139506_c0_seq1	3.61489	2.57736	37.1394	1.09976e-09	8.89016e-08
comp2262283_c1_seq4	-3.6373	2.20943	37.1192	1.11125e-09	8.9691e-08
comp2270999_c0_seq5	2.32844	3.72666	37.1051	1.11933e-09	9.02031e-08
comp2274713_c1_seq7	-2.91574	5.11347	37.0353	1.16007e-09	9.33417e-08
comp2267190_c1_seq5	-3.43502	1.92557	37.0196	1.16945e-09	9.39516e-08
comp2256355_c0_seq1	-2.46145	8.81646	37.0069	1.17712e-09	9.44216e-08
comp2279404_c0_seq1	-5.01095	0.565496	37.0021	1.17999e-09	9.45066e-08
comp2253924_c0_seq2	3.26447	4.58913	36.964	1.20328e-09	9.62234e-08
comp2269014_c0_seq1	-3.11187	1.16581	36.9153	1.23373e-09	9.85072e-08
comp2264679_c1_seq10	-2.22773	4.32296	36.9006	1.24306e-09	9.91001e-08
comp2278032_c0_seq9	-2.39297	4.38992	36.8275	1.29057e-09	1.02731e-07
comp2267792_c0_seq2	-2.46699	5.10143	36.7695	1.32955e-09	1.05672e-07
comp2267732_c0_seq2	-2.30172	5.91784	36.7638	1.33341e-09	1.05817e-07
comp2274728_c1_seq5	-3.27125	3.75355	36.7517	1.34173e-09	1.06315e-07
comp2272756_c0_seq1	3.51557	3.28702	36.746	1.3457e-09	1.06468e-07
comp2278017_c0_seq2	-2.45235	3.13675	36.7102	1.37059e-09	1.08273e-07
comp2277878_c2_seq6	-1.96645	3.69966	36.6991	1.37845e-09	1.08705e-07
comp2274387_c0_seq1	-2.41759	3.46006	36.6965	1.38024e-09	1.08705e-07
comp2254382_c0_seq1	-4.11274	0.748475	36.6594	1.40677e-09	1.10627e-07
comp2236614_c0_seq1	-2.45342	4.40733	36.5981	1.45171e-09	1.13989e-07
comp2260026_c0_seq1	-4.72266	0.638689	36.5861	1.46071e-09	1.14523e-07
comp2262875_c0_seq2	-2.77579	1.90602	36.5425	1.49377e-09	1.16938e-07
comp2267703_c0_seq2	-3.16803	1.05035	36.5194	1.51158e-09	1.18155e-07
comp2264803_c1_seq1	-3.12434	1.3105	36.5091	1.51955e-09	1.186e-07
comp2269852_c0_seq5	-2.42439	5.6972	36.5018	1.52525e-09	1.18827e-07
comp2244071_c0_seq1	-4.04145	1.8059	36.4995	1.52702e-09	1.18827e-07
comp2279736_c0_seq1	-2.22465	5.24792	36.4682	1.55178e-09	1.20573e-07
comp2214237_c0_seq1	-3.58049	1.92528	36.4346	1.57873e-09	1.22391e-07
comp2142514_c0_seq2	-3.37865	1.34406	36.4332	1.57988e-09	1.22391e-07
comp2259020_c0_seq6	-2.42474	6.39314	36.4114	1.59766e-09	1.23585e-07
gnl|Pdu_trscr_assembly_1|335847	-2.98884	2.26666	36.4066	1.60163e-09	1.23708e-07
comp2248879_c0_seq1	-3.91713	2.41003	36.3746	1.6281e-09	1.25566e-07
comp2247881_c0_seq1	-2.49272	2.48709	36.3447	1.65331e-09	1.27322e-07
comp2278240_c0_seq4	-2.71754	3.15198	36.3372	1.65968e-09	1.27624e-07
comp2268955_c0_seq1	-2.26858	3.0535	36.3032	1.68885e-09	1.29675e-07
comp2277723_c0_seq7	-3.39319	3.35968	36.2563	1.73002e-09	1.32641e-07
comp2277700_c0_seq9	-1.70772	5.08215	36.2488	1.7367e-09	1.32957e-07
comp2245335_c0_seq1	-5.28253	1.26265	36.2082	1.77325e-09	1.35556e-07
comp2263299_c0_seq2	3.2084	0.549204	36.1573	1.82017e-09	1.38939e-07
comp2278290_c0_seq15	2.35876	6.8947	36.1482	1.82865e-09	1.39273e-07
comp1943186_c0_seq1	-3.36323	2.15155	36.1469	1.8299e-09	1.39273e-07
comp2272254_c0_seq4	-2.79572	5.03048	36.1324	1.84355e-09	1.40107e-07
comp2233130_c0_seq1	3.6969	-1.45937	36.0938	1.88043e-09	1.42702e-07
comp2273350_c0_seq1	-2.05606	3.67319	36.0818	1.89209e-09	1.43377e-07
comp2275560_c0_seq10	-2.29381	2.77531	36.0595	1.9138e-09	1.44812e-07
comp2277137_c0_seq4	-3.19344	2.53468	36.0349	1.93817e-09	1.46443e-07
comp2270884_c1_seq1	-3.98213	0.519786	35.9861	1.98726e-09	1.49935e-07
comp2247991_c0_seq1	-2.53132	2.92085	35.9813	1.99217e-09	1.50087e-07
comp2277030_c1_seq3	-2.93683	1.12356	35.9717	2.002e-09	1.5061e-07
comp2260492_c1_seq4	-3.5888	3.34143	35.9534	2.02097e-09	1.51634e-07
comp2269417_c0_seq1	-2.80741	2.37971	35.9529	2.02144e-09	1.51634e-07
comp2259570_c0_seq1	-2.88814	2.63682	35.9295	2.04584e-09	1.53244e-07
comp2275489_c0_seq1	-3.4868	1.35222	35.9238	2.0519e-09	1.53477e-07
comp2270754_c0_seq3	-3.93898	3.12854	35.8909	2.0868e-09	1.55864e-07
comp2258933_c0_seq1	-4.37857	1.14405	35.8548	2.12583e-09	1.58421e-07
comp2278569_c0_seq1	-2.09969	7.29467	35.8536	2.12713e-09	1.58421e-07
comp2250174_c0_seq1	2.96005	3.14181	35.847	2.1344e-09	1.58735e-07
comp2256469_c0_seq1	-5.97703	-0.162278	35.8105	2.17474e-09	1.61438e-07
comp2239961_c0_seq1	-2.43284	2.51034	35.8085	2.17695e-09	1.61438e-07
comp2266901_c1_seq8	2.46636	3.62252	35.8022	2.18403e-09	1.61542e-07
comp2277913_c2_seq2	-3.19103	2.44227	35.8017	2.18455e-09	1.61542e-07
comp2257382_c0_seq3	-4.08626	9.33411	35.7562	2.23617e-09	1.65125e-07
comp2263713_c0_seq2	-2.12414	4.81024	35.7471	2.24666e-09	1.65664e-07
comp2259724_c1_seq6	-2.42214	2.66269	35.7223	2.27542e-09	1.67547e-07
comp2253329_c0_seq1	-3.46886	2.34426	35.6816	2.32348e-09	1.70844e-07
comp2275942_c1_seq4	-2.77212	6.67918	35.6693	2.33817e-09	1.71683e-07
comp2272105_c0_seq3	-3.80917	2.1094	35.6432	2.36969e-09	1.73751e-07
comp2237006_c0_seq2	-6.13153	1.12094	35.5964	2.42736e-09	1.77564e-07
comp2276784_c0_seq5	-2.9922	5.33067	35.5955	2.4285e-09	1.77564e-07
comp2268417_c0_seq2	-3.15864	6.43334	35.5797	2.44826e-09	1.78758e-07
comp2261448_c0_seq4	-3.8273	2.86999	35.5411	2.49728e-09	1.82081e-07
comp2275224_c0_seq3	-2.94417	4.23188	35.5317	2.50932e-09	1.82703e-07
comp2273515_c0_seq1	-2.56001	1.87787	35.4787	2.57858e-09	1.87483e-07
comp1195550_c0_seq2	4.59257	-1.53874	35.4532	2.61256e-09	1.89689e-07
comp2263921_c0_seq2	-2.06037	6.55875	35.4131	2.66689e-09	1.93364e-07
comp2277656_c2_seq1	-3.48948	2.12069	35.4101	2.67093e-09	1.93388e-07
comp2266758_c1_seq1	-2.82598	5.53822	35.3583	2.74302e-09	1.98332e-07
comp2249204_c0_seq1	-3.05767	2.27554	35.2857	2.84708e-09	2.0557e-07
comp2277638_c1_seq1	-2.94954	3.56609	35.2761	2.86122e-09	2.06305e-07
comp2272658_c2_seq1	-4.52223	0.584473	35.2693	2.87125e-09	2.06491e-07
comp2258728_c0_seq2	-2.74482	1.79329	35.269	2.87174e-09	2.06491e-07
comp1974124_c0_seq1	-4.40091	1.16989	35.2048	2.96796e-09	2.13116e-07
comp2277360_c0_seq2	-1.90045	4.58218	35.1997	2.97571e-09	2.13378e-07
comp2277808_c1_seq1	-3.44302	2.02194	35.1776	3.0096e-09	2.15385e-07
comp2275241_c0_seq5	-2.78063	3.60307	35.1761	3.01197e-09	2.15385e-07
comp2269109_c0_seq7	-2.55761	1.7968	35.1607	3.03593e-09	2.16801e-07
comp2062631_c0_seq1	-4.68225	0.259919	35.134	3.07781e-09	2.1949e-07
comp2236375_c0_seq1	-3.23333	2.62415	35.1012	3.13003e-09	2.22909e-07
gnl|Pdu_trscr_assembly_1|9334	-2.28186	7.17708	35.0757	3.17136e-09	2.25543e-07
comp2274259_c0_seq1	-1.71868	4.85557	35.0698	3.181e-09	2.2592e-07
comp2276539_c0_seq2	-1.85743	5.07051	35.0287	3.24883e-09	2.30424e-07
comp2138964_c0_seq1	-2.63354	2.68808	35.0075	3.28433e-09	2.32624e-07
comp2267193_c0_seq1	4.09462	0.430503	34.9581	3.36877e-09	2.38281e-07
comp2276447_c2_seq8	-1.97632	6.13254	34.9239	3.42844e-09	2.42172e-07
gnl|Pdu_trscr_assembly_1|1117	-2.53362	3.82715	34.9159	3.44259e-09	2.42843e-07
comp2278019_c1_seq1	-2.08299	5.68223	34.8797	3.50711e-09	2.47059e-07
gnl|Pdu_trscr_assembly_1|202903	-2.69094	1.59124	34.8667	3.53068e-09	2.48384e-07
comp2275820_c0_seq6	-1.95368	4.77794	34.8367	3.58548e-09	2.51898e-07
comp2271380_c0_seq2	2.30932	2.08044	34.7862	3.67977e-09	2.58174e-07
comp2273647_c0_seq2	-3.1461	5.39866	34.7325	3.7826e-09	2.65032e-07
comp2275704_c0_seq6	-3.12425	2.20495	34.7235	3.8002e-09	2.65907e-07
comp2257855_c0_seq2	4.40689	0.240534	34.6746	3.89682e-09	2.72301e-07
comp2277501_c0_seq23	-3.14981	6.7267	34.6492	3.94793e-09	2.75503e-07
comp2274596_c1_seq6	-2.24756	3.21942	34.6052	4.03832e-09	2.81434e-07
comp2257274_c0_seq1	-2.8441	1.84958	34.5866	4.07701e-09	2.8375e-07
comp2270465_c0_seq1	-4.15257	3.99098	34.5323	4.19228e-09	2.91383e-07
comp2254348_c0_seq1	-3.39598	1.11018	34.4925	4.27892e-09	2.97008e-07
comp2278127_c0_seq2	-2.10167	5.20402	34.4335	4.41056e-09	3.05738e-07
gnl|Pdu_trscr_assembly_1|18304	-4.05401	1.75382	34.4099	4.46446e-09	3.09063e-07
comp2276790_c0_seq3	-2.8673	4.81982	34.3827	4.52733e-09	3.1282e-07
comp2205034_c0_seq1	-4.76974	1.89726	34.3812	4.53075e-09	3.1282e-07
comp2263357_c0_seq2	-3.87136	3.83365	34.3745	4.5463e-09	3.13478e-07
comp2223422_c0_seq1	-1.99263	3.51937	34.3439	4.61842e-09	3.17842e-07
comp2254664_c0_seq1	-4.48762	0.817135	34.3425	4.6218e-09	3.17842e-07
comp2276641_c1_seq16	4.17301	7.07767	34.3269	4.65889e-09	3.1997e-07
comp2257612_c0_seq1	5.29862	-1.43744	34.3199	4.67584e-09	3.20711e-07
comp2276206_c0_seq14	-2.50049	6.80645	34.3142	4.68937e-09	3.21215e-07
comp2276795_c0_seq4	2.08546	4.7065	34.3085	4.70311e-09	3.21734e-07
comp2254374_c1_seq4	3.16424	2.25842	34.2686	4.80075e-09	3.27982e-07
comp2273141_c0_seq2	-1.99705	9.28582	34.2514	4.84332e-09	3.30456e-07
comp2256548_c0_seq1	3.36438	-0.310751	34.2218	4.91747e-09	3.35077e-07
comp2272893_c0_seq2	-3.88372	2.74	34.213	4.9398e-09	3.36158e-07
comp2246605_c0_seq1	-1.94483	7.149	34.1895	4.99974e-09	3.39615e-07
comp2277815_c1_seq2	2.60102	4.3965	34.188	5.00364e-09	3.39615e-07
comp2198732_c0_seq2	-3.9592	1.31607	34.1479	5.10775e-09	3.4623e-07
comp2224545_c0_seq1	4.45703	-1.14802	34.133	5.14707e-09	3.48441e-07
comp2275350_c0_seq1	1.89358	5.58779	34.1301	5.1548e-09	3.48511e-07
comp2264734_c0_seq1	-2.93435	1.45301	34.1033	5.22627e-09	3.52885e-07
comp2273939_c0_seq1	2.71032	2.47215	34.0926	5.25518e-09	3.54378e-07
comp2265508_c0_seq15	-2.11443	3.79384	34.0714	5.31262e-09	3.57787e-07
comp1985261_c1_seq1	-2.89182	2.93351	34.0548	5.35826e-09	3.60395e-07
comp2253974_c0_seq1	-3.2308	1.73463	34.0186	5.45872e-09	3.66678e-07
comp2275741_c0_seq1	1.88919	6.81171	34.0051	5.49672e-09	3.68755e-07
comp2265142_c0_seq2	-2.63107	2.73922	33.9914	5.53562e-09	3.70886e-07
comp2127369_c0_seq1	-3.13908	1.71585	33.924	5.73077e-09	3.83468e-07
comp2261787_c0_seq1	2.82833	2.34648	33.8968	5.81145e-09	3.88368e-07
comp2267875_c0_seq5	1.78958	5.30212	33.8914	5.82768e-09	3.88953e-07
comp2268188_c0_seq3	-2.63509	2.76123	33.8857	5.84464e-09	3.89586e-07
comp2258892_c0_seq1	-2.50482	3.40508	33.8525	5.9454e-09	3.95795e-07
comp2264860_c0_seq2	-2.38645	2.19372	33.8464	5.96379e-09	3.96512e-07
comp2277384_c0_seq3	-3.08288	5.74845	33.8428	5.97501e-09	3.96752e-07
comp2273312_c0_seq15	-2.80879	1.94372	33.8031	6.09803e-09	4.04348e-07
comp2267797_c1_seq1	-2.92527	1.99759	33.8009	6.10494e-09	4.04348e-07
comp2232388_c0_seq1	-3.32846	1.1406	33.7451	6.28267e-09	4.1559e-07
comp2275955_c0_seq3	-2.05198	2.73297	33.7059	6.41074e-09	4.23524e-07
comp2271228_c0_seq6	-2.24205	7.29672	33.6741	6.51616e-09	4.29802e-07
comp2263661_c0_seq1	-1.94081	5.66911	33.6723	6.52229e-09	4.29802e-07
comp2257109_c0_seq2	-3.52012	1.02992	33.6509	6.59428e-09	4.33997e-07
comp2277388_c0_seq8	-2.25956	5.31687	33.6364	6.64382e-09	4.36706e-07
comp2270915_c0_seq1	-2.28857	2.81556	33.6014	6.76434e-09	4.44067e-07
comp2276235_c1_seq9	-3.61244	2.38888	33.5886	6.80903e-09	4.45957e-07
comp2220459_c0_seq1	-5.12106	0.331032	33.5883	6.81026e-09	4.45957e-07
comp2268289_c0_seq5	-2.65966	4.92719	33.5763	6.85233e-09	4.48148e-07
comp2248121_c0_seq5	4.20191	-1.83184	33.5568	6.92128e-09	4.52089e-07
comp2261723_c0_seq1	2.99547	4.63702	33.551	6.94197e-09	4.52872e-07
comp2278120_c2_seq1	-3.25804	5.4149	33.5207	7.05104e-09	4.59412e-07
comp2274017_c0_seq3	-2.38399	4.06937	33.5029	7.11576e-09	4.63049e-07
comp2257509_c0_seq1	-2.7875	1.49355	33.474	7.22235e-09	4.69399e-07
comp2245391_c0_seq1	-2.80695	2.47519	33.4609	7.27122e-09	4.71986e-07
comp2264743_c0_seq3	-1.87061	5.78434	33.4011	7.498e-09	4.861e-07
comp2262340_c0_seq2	4.68216	-0.222197	33.3939	7.52604e-09	4.87114e-07
comp2142794_c0_seq1	-2.88533	5.13007	33.3923	7.53235e-09	4.87114e-07
comp2253656_c0_seq3	-2.44045	4.56273	33.3692	7.62226e-09	4.92317e-07
comp2243988_c0_seq1	-2.51741	2.52432	33.3285	7.78331e-09	5.02096e-07
comp2277723_c2_seq1	-3.08965	3.574	33.2764	7.99489e-09	5.15106e-07
comp2278062_c0_seq4	4.20804	6.68861	33.2637	8.04712e-09	5.17831e-07
comp2271953_c0_seq4	-1.62529	5.20942	33.2157	8.24811e-09	5.30109e-07
comp2268682_c0_seq5	-2.67205	1.71028	33.2026	8.30401e-09	5.33044e-07
comp2280178_c0_seq1	-2.90887	4.48055	33.1964	8.33066e-09	5.34096e-07
comp2254542_c0_seq1	-4.28821	5.21993	33.164	8.47046e-09	5.4239e-07
comp2269060_c0_seq1	-4.35969	6.59491	33.1468	8.54571e-09	5.46537e-07
comp2264020_c0_seq1	-2.56453	3.34541	33.1412	8.57042e-09	5.47445e-07
comp2204288_c0_seq1	-4.58112	0.504053	33.137	8.58867e-09	5.47938e-07
comp2265084_c0_seq1	-3.57167	4.09042	33.1302	8.61879e-09	5.49186e-07
comp2274726_c0_seq7	-2.37927	2.66082	33.0965	8.76967e-09	5.58118e-07
comp2272502_c0_seq1	2.63825	5.48789	33.088	8.80821e-09	5.59417e-07
comp2271893_c0_seq3	-2.63332	2.86956	33.0872	8.81158e-09	5.59417e-07
comp2278382_c1_seq1	-1.94347	5.92932	33.0814	8.83788e-09	5.60403e-07
comp2138157_c0_seq1	-3.12561	3.68751	33.0578	8.94591e-09	5.66564e-07
comp2273169_c2_seq2	2.37462	5.60753	33.0314	9.06822e-09	5.73612e-07
comp2258266_c0_seq1	2.5118	2.23111	32.9969	9.23046e-09	5.83166e-07
comp2277440_c0_seq1	-2.27101	3.66902	32.9727	9.34625e-09	5.89765e-07
comp2267745_c0_seq3	2.74812	0.30263	32.9564	9.42508e-09	5.94019e-07
comp2221211_c0_seq1	-3.17901	4.54876	32.9488	9.46191e-09	5.9562e-07
comp2268784_c1_seq20	-2.08248	7.60281	32.9413	9.49826e-09	5.97186e-07
comp2239091_c1_seq1	-5.39705	0.522438	32.934	9.53398e-09	5.98708e-07
comp2266655_c1_seq2	-2.85363	1.5346	32.8837	9.78385e-09	6.13659e-07
comp2276257_c0_seq6	2.00251	3.81837	32.8528	9.941e-09	6.22766e-07
comp1971890_c0_seq1	-3.50699	1.06338	32.8146	1.01381e-08	6.3435e-07
comp1912727_c0_seq1	3.54133	-1.12224	32.7718	1.03637e-08	6.47686e-07
comp2272567_c1_seq2	-2.53924	7.62572	32.7608	1.04223e-08	6.5057e-07
comp2201594_c0_seq1	2.92866	1.01466	32.743	1.05184e-08	6.55783e-07
Pdu_c-opsin1_cDNA_	6.55228	1.47122	32.7173	1.06582e-08	6.63703e-07
comp2250615_c0_seq1	5.86091	-0.195257	32.7105	1.06956e-08	6.65235e-07
comp2245756_c0_seq1	-4.92077	-0.74403	32.6354	1.11174e-08	6.90644e-07
comp2245338_c0_seq1	-8.04168	-0.378219	32.5855	1.14064e-08	7.07757e-07
comp2273403_c0_seq2	-1.95431	7.28324	32.5798	1.14397e-08	7.08976e-07
comp2261071_c0_seq1	3.2486	2.58998	32.5536	1.15951e-08	7.17752e-07
comp2252709_c0_seq3	1.92147	3.43174	32.5462	1.16391e-08	7.1962e-07
comp2141175_c0_seq1	-2.41338	2.50231	32.5362	1.16991e-08	7.22473e-07
comp2275488_c0_seq1	1.81042	4.73891	32.506	1.18823e-08	7.32915e-07
comp2220394_c0_seq1	-2.63819	4.99927	32.4915	1.19714e-08	7.37535e-07
comp2264910_c2_seq1	-2.98644	2.37533	32.4817	1.20322e-08	7.40408e-07
comp1933325_c0_seq2	-2.07744	5.67241	32.4766	1.20634e-08	7.41452e-07
comp2273850_c0_seq31	-2.91499	2.26098	32.4585	1.21767e-08	7.4753e-07
gnl|Pdu_trscr_assembly_1|16681	-2.96596	9.79789	32.4448	1.22625e-08	7.51913e-07
comp2231262_c0_seq2	-3.85622	0.347592	32.4294	1.23604e-08	7.57022e-07
comp2253691_c1_seq1	2.10174	6.51485	32.4067	1.25053e-08	7.64996e-07
comp2250851_c0_seq2	-3.07566	1.51779	32.4039	1.25232e-08	7.65196e-07
comp2278108_c0_seq1	-2.50579	7.57977	32.3934	1.25913e-08	7.68453e-07
comp2260341_c1_seq1	-4.73112	0.664845	32.3817	1.26676e-08	7.72202e-07
comp2276798_c2_seq4	2.12484	5.00286	32.3462	1.29012e-08	7.85522e-07
comp2263803_c0_seq1	-3.31793	6.01088	32.3329	1.29894e-08	7.89972e-07
comp2262029_c0_seq1	-4.79102	0.271098	32.3042	1.31829e-08	8.00806e-07
comp2232305_c0_seq1	-2.57823	3.80404	32.2786	1.33577e-08	8.10476e-07
comp2257649_c0_seq1	-4.15071	3.89553	32.2507	1.35511e-08	8.21252e-07
comp2273119_c1_seq7	-1.8263	4.98361	32.2317	1.36843e-08	8.28362e-07
gnl|Pdu_trscr_assembly_1|3048	-3.50549	7.72275	32.2244	1.37354e-08	8.30486e-07
comp2257071_c0_seq1	-3.99948	1.67574	32.194	1.39522e-08	8.42619e-07
comp2259270_c0_seq5	-4.46999	0.460572	32.1705	1.4122e-08	8.51888e-07
comp2276147_c0_seq4	-1.99192	3.95992	32.1383	1.43576e-08	8.65097e-07
comp2272573_c0_seq1	-2.09179	3.93507	32.1331	1.4396e-08	8.66406e-07
comp2264227_c0_seq2	2.87099	0.342448	32.0907	1.47137e-08	8.84502e-07
comp2275800_c0_seq2	-2.32019	6.32364	32.0775	1.4814e-08	8.89509e-07
comp2270492_c0_seq3	-2.47091	5.49	32.0554	1.49841e-08	8.98685e-07
comp2277927_c3_seq2	-4.24439	0.672728	32.0041	1.53848e-08	9.21656e-07
comp2275797_c0_seq1	-1.83693	3.9676	31.9884	1.55093e-08	9.28042e-07
comp2243922_c0_seq1	-4.79786	-0.0461595	31.9814	1.55659e-08	9.30359e-07
comp2245660_c0_seq4	-5.52937	-0.468719	31.9663	1.56867e-08	9.36505e-07
comp1985114_c0_seq1	-2.21248	3.32587	31.964	1.57058e-08	9.36574e-07
comp2270043_c0_seq2	-3.92409	0.573393	31.9474	1.58402e-08	9.43508e-07
comp2269327_c0_seq1	-2.12436	3.0527	31.939	1.59091e-08	9.46525e-07
comp2265867_c0_seq7	-4.15802	1.13052	31.8964	1.62619e-08	9.66412e-07
comp2267225_c1_seq1	-3.31325	0.441259	31.8816	1.63866e-08	9.72547e-07
comp2269756_c0_seq10	-2.34284	8.42705	31.8797	1.64025e-08	9.72547e-07
comp2272249_c0_seq2	2.20828	3.10433	31.8077	1.70221e-08	1.00779e-06
comp2266191_c3_seq1	-3.19506	1.41305	31.8061	1.70356e-08	1.00779e-06
comp2269532_c0_seq13	-3.79904	6.68294	31.749	1.7544e-08	1.03591e-06
comp2275542_c0_seq9	-3.02781	3.94476	31.7483	1.75506e-08	1.03591e-06
comp2269675_c1_seq8	-2.05937	4.17196	31.7399	1.76265e-08	1.03921e-06
comp2200791_c0_seq1	-2.37008	4.72886	31.7268	1.77455e-08	1.04504e-06
comp2253021_c0_seq2	-2.82471	0.845447	31.7001	1.79911e-08	1.0583e-06
comp2273174_c1_seq4	-3.76232	2.02795	31.6947	1.80413e-08	1.06006e-06
comp2264540_c1_seq15	2.17261	2.8628	31.6776	1.82006e-08	1.06821e-06
comp2263020_c0_seq1	-2.26052	2.64837	31.6295	1.86574e-08	1.09379e-06
comp2274415_c0_seq2	-2.16638	3.46324	31.6271	1.86808e-08	1.09393e-06
comp2257694_c0_seq1	-2.90962	1.12729	31.6115	1.88312e-08	1.1015e-06
comp2250112_c0_seq1	-3.32826	1.97906	31.5996	1.89466e-08	1.107e-06
comp2272717_c0_seq1	-2.60163	1.65711	31.514	1.98006e-08	1.1556e-06
comp2262362_c0_seq1	-1.8558	5.0658	31.4997	1.99469e-08	1.16284e-06
comp2234777_c0_seq2	4.96021	-0.650671	31.4872	2.00758e-08	1.16905e-06
comp1908346_c0_seq1	4.57557	-1.39167	31.4689	2.02662e-08	1.17881e-06
comp2266942_c0_seq1	3.55404	0.0764987	31.4421	2.05476e-08	1.19385e-06
comp2258922_c0_seq1	-3.89855	0.643944	31.3948	2.10549e-08	1.22196e-06
comp2266805_c0_seq1	-3.94629	0.486117	31.3772	2.12459e-08	1.23167e-06
comp2277737_c0_seq3	-1.83529	3.33066	31.3719	2.13044e-08	1.23369e-06
comp2266432_c0_seq1	-2.7733	4.81432	31.3501	2.15452e-08	1.24625e-06
comp1339124_c0_seq1	-3.80992	5.37829	31.346	2.15902e-08	1.24625e-06
gnl|Pdu_trscr_assembly_1|4310	-2.93167	4.69482	31.3458	2.15931e-08	1.24625e-06
comp2276182_c0_seq1	-1.79615	4.43893	31.3426	2.16279e-08	1.24688e-06
comp2263577_c0_seq1	-2.08126	4.19682	31.3121	2.19707e-08	1.26524e-06
comp2232290_c0_seq2	-2.38878	8.52406	31.236	2.28491e-08	1.31437e-06
comp2270479_c0_seq1	-3.34914	2.00332	31.1638	2.37144e-08	1.36264e-06
comp2270618_c0_seq1	-3.90967	3.95767	31.1503	2.38802e-08	1.37065e-06
comp2276278_c0_seq2	-1.80096	3.80475	31.1429	2.39713e-08	1.37436e-06
comp2269145_c0_seq2	-2.79039	3.4612	31.1374	2.40392e-08	1.37648e-06
comp2206764_c0_seq1	4.30556	3.45894	31.1348	2.4072e-08	1.37648e-06
comp2274783_c0_seq9	-3.21251	8.47819	31.1335	2.40875e-08	1.37648e-06
comp2271592_c0_seq12	-3.14124	2.16685	31.1286	2.41485e-08	1.37845e-06
comp2217620_c0_seq2	4.43994	0.355674	31.1151	2.43178e-08	1.3866e-06
comp2209889_c0_seq4	2.26232	2.28315	31.0784	2.47819e-08	1.41151e-06
comp2277084_c0_seq2	-3.56771	2.07099	31.0516	2.51261e-08	1.42955e-06
comp2252310_c0_seq2	3.5447	-0.0462389	31.0034	2.57581e-08	1.46391e-06
comp2270235_c0_seq2	-3.40821	5.1333	30.9789	2.60848e-08	1.48086e-06
comp2269794_c1_seq8	-2.29876	1.456	30.93	2.67505e-08	1.517e-06
comp1376985_c0_seq1	4.1668	-2.11186	30.9041	2.71101e-08	1.53572e-06
comp2271613_c1_seq13	-3.32326	0.926093	30.8614	2.7713e-08	1.56817e-06
comp2259757_c0_seq3	4.30492	0.0647173	30.8525	2.78408e-08	1.57167e-06
comp2240351_c0_seq2	-2.7024	2.92642	30.8521	2.78464e-08	1.57167e-06
comp2261512_c0_seq2	2.24517	4.57885	30.8507	2.78656e-08	1.57167e-06
comp2269440_c1_seq3	-2.30828	1.8999	30.8429	2.79789e-08	1.57636e-06
comp2278215_c0_seq13	-1.91471	5.07796	30.7835	2.88483e-08	1.62358e-06
comp2266617_c0_seq1	3.10791	4.20376	30.7712	2.90317e-08	1.63214e-06
comp2262740_c0_seq13	-2.72967	5.48474	30.7561	2.92579e-08	1.64308e-06
comp2277289_c2_seq2	2.58011	2.97216	30.7168	2.98567e-08	1.6749e-06
comp2258725_c0_seq1	2.29821	3.62765	30.6986	3.01375e-08	1.68883e-06
comp2243479_c0_seq1	3.77924	-0.226155	30.6696	3.05928e-08	1.71251e-06
comp2262461_c0_seq2	-2.92235	4.44292	30.6644	3.06749e-08	1.71526e-06
comp2263907_c0_seq1	-2.31938	2.66784	30.6563	3.08032e-08	1.72059e-06
comp2269208_c1_seq1	-2.06839	2.76446	30.6467	3.09554e-08	1.72642e-06
comp1934156_c0_seq1	-2.40028	1.42906	30.6455	3.09741e-08	1.72642e-06
comp2274903_c0_seq2	-3.02049	1.8101	30.6426	3.10202e-08	1.72714e-06
comp2272070_c1_seq2	-2.09131	3.57512	30.6365	3.11187e-08	1.73078e-06
comp2265464_c0_seq1	-2.65256	6.92758	30.6007	3.16982e-08	1.76113e-06
comp2276099_c0_seq2	-1.83532	3.17056	30.5952	3.17881e-08	1.76424e-06
comp2264611_c0_seq3	-2.19354	4.33848	30.592	3.18402e-08	1.76525e-06
comp2268302_c0_seq1	4.59087	5.94579	30.5867	3.19279e-08	1.76823e-06
comp2275887_c0_seq1	-2.06246	2.68913	30.5659	3.2272e-08	1.78539e-06
comp2272098_c1_seq1	-4.31405	0.470825	30.553	3.24862e-08	1.79533e-06
comp2260377_c0_seq3	1.8466	3.30109	30.5482	3.25682e-08	1.79795e-06
comp2266139_c1_seq2	-2.78085	2.13172	30.4942	3.34862e-08	1.84667e-06
comp1953996_c0_seq1	-2.1804	3.29827	30.4831	3.36789e-08	1.85533e-06
comp1942453_c0_seq1	-1.93363	4.49555	30.4651	3.39932e-08	1.87067e-06
comp2265764_c0_seq1	-3.11099	0.953784	30.4564	3.41447e-08	1.87702e-06
comp2266701_c0_seq3	-2.7284	11.5028	30.4347	3.45297e-08	1.89618e-06
comp2213012_c1_seq1	5.04686	-1.41251	30.3821	3.54791e-08	1.94627e-06
comp2138394_c0_seq1	-2.20761	5.32176	30.3508	3.6055e-08	1.97578e-06
comp2255764_c0_seq3	-4.00171	1.60398	30.3307	3.64319e-08	1.99433e-06
comp2245811_c0_seq1	-2.1121	5.60973	30.3119	3.67867e-08	2.01164e-06
comp2254371_c0_seq1	-2.04285	6.83983	30.303	3.69562e-08	2.01879e-06
comp2242437_c0_seq2	2.89242	-0.536382	30.2917	3.71709e-08	2.02839e-06
comp2276165_c0_seq6	2.80103	7.08318	30.2729	3.75329e-08	2.046e-06
comp2267722_c0_seq4	-2.90572	0.479991	30.2455	3.80676e-08	2.07297e-06
comp2270332_c1_seq1	-8.35004	-0.769958	30.2398	3.81785e-08	2.07684e-06
comp2271317_c1_seq3	2.69125	3.11978	30.2048	3.88739e-08	2.11246e-06
comp2248808_c0_seq2	-3.0124	10.3942	30.1923	3.91251e-08	2.12389e-06
comp2271029_c0_seq1	-2.13387	4.99047	30.1504	3.99808e-08	2.16808e-06
comp2264469_c0_seq6	-4.15761	0.836475	30.1429	4.01352e-08	2.17419e-06
comp2266360_c0_seq2	2.03298	1.43438	30.1263	4.04813e-08	2.19066e-06
comp2266806_c0_seq8	-3.23603	3.34159	30.1079	4.08656e-08	2.20916e-06
comp2264508_c1_seq2	-3.0602	1.7341	30.1045	4.09377e-08	2.21076e-06
comp2270443_c0_seq7	-2.99287	2.66591	30.0934	4.11723e-08	2.21668e-06
comp2244718_c0_seq4	-3.53449	0.164129	30.0933	4.11744e-08	2.21668e-06
comp2273445_c0_seq4	2.87721	0.938173	30.0933	4.1175e-08	2.21668e-06
comp2260027_c0_seq1	2.55116	2.5119	30.0569	4.19554e-08	2.25636e-06
comp2266348_c0_seq1	3.05679	0.975773	30.0499	4.21066e-08	2.26215e-06
comp2270520_c0_seq5	2.46179	5.51375	30.047	4.21698e-08	2.26322e-06
comp2258113_c0_seq1	-1.89181	4.09775	29.9868	4.35002e-08	2.33221e-06
comp2241894_c0_seq1	-2.87918	0.472712	29.9719	4.38355e-08	2.34567e-06
comp2250842_c0_seq2	3.31103	0.684224	29.9716	4.38413e-08	2.34567e-06
comp1953387_c0_seq1	-1.69854	3.42206	29.9509	4.43121e-08	2.36842e-06
comp2274690_c0_seq14	-2.02841	3.84646	29.9407	4.45474e-08	2.37856e-06
comp2268642_c1_seq1	2.15727	2.04066	29.9293	4.48085e-08	2.39004e-06
comp2259837_c0_seq2	-2.50793	2.63759	29.9261	4.48825e-08	2.39154e-06
comp2264106_c2_seq1	-1.7033	3.94113	29.9051	4.53708e-08	2.41323e-06
comp2262465_c0_seq5	-5.01809	4.99094	29.9047	4.53823e-08	2.41323e-06
comp2268582_c0_seq4	-2.70737	1.48786	29.8966	4.55721e-08	2.41752e-06
comp2259973_c0_seq2	-2.20655	2.8497	29.896	4.55855e-08	2.41752e-06
gnl|Pdu_trscr_assembly_1|20826	-2.77859	1.76454	29.8953	4.56021e-08	2.41752e-06
comp2239600_c0_seq1	-2.98679	0.709734	29.8435	4.68365e-08	2.48043e-06
comp2259185_c0_seq1	-3.91873	-0.264501	29.8387	4.69518e-08	2.48401e-06
comp2276806_c0_seq3	2.39439	5.26195	29.8345	4.70546e-08	2.48692e-06
comp2253086_c0_seq1	-3.95286	2.14259	29.8252	4.72801e-08	2.4963e-06
comp2138000_c0_seq1	-2.42914	4.28315	29.819	4.74313e-08	2.50175e-06
comp2277661_c0_seq18	-1.78009	3.90077	29.8099	4.76556e-08	2.51104e-06
comp2261738_c0_seq5	1.80631	4.528	29.7975	4.79609e-08	2.52457e-06
gnl|Pdu_trscr_assembly_1|760	2.17729	3.02978	29.79	4.81476e-08	2.53183e-06
comp2277771_c0_seq4	-1.73245	4.64117	29.7383	4.94471e-08	2.59754e-06
comp2273215_c1_seq2	-2.37245	5.00275	29.7013	5.04e-08	2.64493e-06
comp2267074_c0_seq1	-2.53858	2.70382	29.698	5.04858e-08	2.64677e-06
comp2269326_c0_seq2	-1.58038	5.77206	29.6819	5.09078e-08	2.6662e-06
comp2272624_c0_seq15	-3.46101	2.13597	29.6691	5.12453e-08	2.68118e-06
comp2248429_c0_seq1	-1.93965	3.61648	29.6542	5.16407e-08	2.69916e-06
comp2176475_c0_seq1	3.71729	-0.473983	29.629	5.23159e-08	2.73171e-06
comp2272169_c2_seq2	-2.07058	3.34882	29.6145	5.271e-08	2.74953e-06
comp1916779_c0_seq1	-1.94242	5.11124	29.6077	5.28951e-08	2.75642e-06
comp2256415_c0_seq2	-8.81261	-0.179727	29.6042	5.29909e-08	2.75866e-06
comp2267437_c1_seq1	-2.10504	5.25709	29.6009	5.30804e-08	2.76055e-06
comp2270674_c0_seq3	-2.47	1.62632	29.5958	5.32199e-08	2.76504e-06
comp2222284_c0_seq1	-3.48424	0.449993	29.5747	5.38033e-08	2.79257e-06
comp2278509_c0_seq8	-2.10716	6.11301	29.5669	5.40199e-08	2.80102e-06
comp2265088_c0_seq2	-3.46129	0.703405	29.5564	5.4314e-08	2.81347e-06
comp2248271_c0_seq1	-8.02548	-0.746364	29.5177	5.54091e-08	2.86734e-06
comp2245788_c0_seq1	-2.49536	2.31079	29.5034	5.5818e-08	2.88563e-06
comp2276304_c1_seq32	-1.76067	6.2671	29.4524	5.73059e-08	2.95961e-06
comp2216126_c0_seq1	-1.99187	2.50099	29.4132	5.8479e-08	3.0172e-06
comp2254431_c0_seq4	1.92674	1.46185	29.4097	5.85844e-08	3.01965e-06
comp2272414_c0_seq2	-3.51007	2.22931	29.3915	5.91364e-08	3.04509e-06
comp2275471_c1_seq2	-1.78701	3.04133	29.3859	5.93075e-08	3.05088e-06
comp2138556_c0_seq1	4.71753	-1.70277	29.3783	5.95393e-08	3.05978e-06
comp2270781_c0_seq3	-3.25534	3.44615	29.3761	5.96095e-08	3.05978e-06
comp2256595_c0_seq1	-4.76657	0.31879	29.3745	5.96569e-08	3.05978e-06
comp2277514_c0_seq1	-2.15129	2.5168	29.3363	6.08437e-08	3.11758e-06
comp2265991_c0_seq1	2.65613	3.56989	29.3014	6.19515e-08	3.16931e-06
comp2275420_c0_seq3	-1.92119	2.67789	29.3006	6.1975e-08	3.16931e-06
comp2275371_c0_seq2	-1.90484	3.81469	29.2885	6.2365e-08	3.18612e-06
comp2273038_c1_seq1	-1.8365	6.28846	29.2743	6.28242e-08	3.20644e-06
comp2267924_c2_seq4	-3.86842	4.80359	29.2711	6.2928e-08	3.20859e-06
comp2261862_c1_seq1	-2.9504	0.792969	29.268	6.30276e-08	3.21052e-06
comp2277003_c1_seq5	-2.92302	3.39285	29.2385	6.39947e-08	3.2566e-06
comp2271113_c0_seq5	-2.4151	5.08921	29.2087	6.49871e-08	3.30387e-06
gnl|Pdu_trscr_assembly_1|19606	-2.90199	1.75329	29.1963	6.54054e-08	3.32189e-06
comp2254333_c0_seq1	-1.9509	2.77188	29.1937	6.54921e-08	3.32305e-06
comp2278415_c0_seq2	-1.69997	5.44707	29.1877	6.56965e-08	3.33018e-06
comp2255160_c0_seq1	-4.63174	0.230802	29.1699	6.63027e-08	3.35764e-06
comp2273132_c0_seq2	3.05704	-0.386051	29.1483	6.70458e-08	3.39197e-06
comp2231865_c0_seq1	3.17773	0.560589	29.1416	6.72785e-08	3.40044e-06
comp2268651_c0_seq1	-1.8858	4.514	29.1153	6.81964e-08	3.44196e-06
comp2264311_c1_seq1	-3.08092	2.401	29.1126	6.82898e-08	3.44196e-06
comp2277203_c0_seq4	1.67427	5.41909	29.1124	6.82984e-08	3.44196e-06
comp2258032_c0_seq1	-3.42467	1.14938	29.0537	7.04003e-08	3.54446e-06
comp2263164_c1_seq3	-3.1382	1.4941	29.0284	7.13232e-08	3.58542e-06
comp2250837_c0_seq1	-2.67942	0.808134	29.0277	7.13516e-08	3.58542e-06
comp2270954_c0_seq2	-2.43713	3.32307	28.9847	7.29515e-08	3.66228e-06
comp2277004_c0_seq2	-2.67793	3.83405	28.9786	7.3182e-08	3.67031e-06
comp2270081_c0_seq3	2.26007	3.22158	28.9699	7.35102e-08	3.68322e-06
comp2274564_c0_seq2	-2.06918	2.96715	28.9675	7.36032e-08	3.68434e-06
comp1174362_c0_seq1	3.3843	0.862126	28.9473	7.43757e-08	3.71943e-06
comp2273339_c0_seq1	-1.73755	5.5139	28.9359	7.48126e-08	3.73769e-06
comp2254294_c0_seq1	2.66128	2.24665	28.9129	7.57057e-08	3.77868e-06
comp2246565_c0_seq1	-2.99307	1.16465	28.9063	7.59649e-08	3.78554e-06
comp2278034_c0_seq2	-1.59203	6.15384	28.9057	7.59885e-08	3.78554e-06
comp2254063_c0_seq2	5.1675	-1.71259	28.8682	7.74759e-08	3.85594e-06
comp2260132_c0_seq1	-3.84909	-0.0815118	28.8605	7.7784e-08	3.86435e-06
comp2278273_c0_seq4	-2.31831	5.69189	28.8602	7.77933e-08	3.86435e-06
comp2258180_c0_seq1	3.30646	0.59395	28.826	7.91798e-08	3.92812e-06
comp2254354_c0_seq1	-3.0304	0.768524	28.8249	7.92278e-08	3.92812e-06
comp2268408_c0_seq1	-2.78483	2.98839	28.8204	7.94098e-08	3.93339e-06
comp2268821_c0_seq7	2.78738	1.73122	28.802	8.01694e-08	3.96724e-06
comp2269281_c0_seq10	-3.00531	0.458802	28.7939	8.05059e-08	3.98011e-06
comp2267504_c3_seq1	-1.96532	2.19651	28.7698	8.15121e-08	4.02603e-06
comp2273178_c0_seq1	-2.26392	2.81382	28.7618	8.18477e-08	4.03877e-06
comp2267666_c0_seq3	2.32562	2.1726	28.7349	8.29941e-08	4.09147e-06
comp2258527_c0_seq1	-1.93186	3.30223	28.7146	8.38709e-08	4.13078e-06
comp2258393_c1_seq1	-2.2375	1.98782	28.6884	8.50109e-08	4.181e-06
comp2254316_c0_seq1	-5.16278	1.85977	28.6875	8.50512e-08	4.181e-06
comp2239692_c0_seq1	-3.27285	1.24283	28.6381	8.72486e-08	4.28498e-06
comp2275233_c0_seq4	-1.99958	2.32768	28.6194	8.80953e-08	4.32248e-06
comp2262167_c0_seq1	-4.59344	2.22096	28.6094	8.85533e-08	4.34086e-06
comp2260737_c2_seq8	-2.35701	5.86303	28.6032	8.88336e-08	4.3505e-06
comp2201258_c0_seq1	3.07257	-0.167625	28.5904	8.94258e-08	4.37539e-06
comp2272519_c1_seq3	-2.53087	8.56142	28.5486	9.13766e-08	4.46664e-06
comp2272257_c1_seq3	-1.65694	6.39	28.5331	9.21125e-08	4.49391e-06
comp2261355_c0_seq1	-2.17811	4.54515	28.5322	9.21536e-08	4.49391e-06
comp2270227_c0_seq1	-2.13704	4.73472	28.5314	9.21934e-08	4.49391e-06
comp2208952_c0_seq1	-2.24943	1.89695	28.5191	9.27806e-08	4.5183e-06
comp2259437_c0_seq1	-1.84705	4.01337	28.5152	9.2967e-08	4.52315e-06
comp2277475_c0_seq2	-2.25423	7.95554	28.5014	9.36324e-08	4.55127e-06
comp2275926_c0_seq2	-2.34013	3.81679	28.4516	9.60727e-08	4.66553e-06
gnl|Pdu_trscr_assembly_1|7104	-1.91147	3.00793	28.4324	9.70278e-08	4.70752e-06
comp2261841_c1_seq1	-4.54441	0.101933	28.4129	9.80113e-08	4.74756e-06
comp2255626_c4_seq1_contamination	5.04552	1.97604	28.4117	9.80707e-08	4.74756e-06
comp2239558_c0_seq1	2.78377	0.210689	28.4106	9.81266e-08	4.74756e-06
comp2259017_c0_seq2	-1.90259	3.47062	28.4049	9.84163e-08	4.75715e-06
comp2259746_c0_seq3	-2.20377	1.7346	28.3988	9.87271e-08	4.76775e-06
comp2277456_c0_seq1	2.2356	6.01667	28.3622	1.0061e-07	4.85417e-06
comp2242307_c0_seq1	3.12712	-0.326251	28.358	1.0083e-07	4.86027e-06
comp2262360_c0_seq1	-2.68577	5.36378	28.3465	1.01432e-07	4.8848e-06
comp2220033_c1_seq1	-3.68601	-0.00722202	28.33	1.02296e-07	4.92184e-06
comp2270604_c0_seq3	-1.83106	6.97882	28.2818	1.04879e-07	5.04148e-06
comp2264824_c0_seq5	-2.96295	0.270894	28.2781	1.05078e-07	5.04636e-06
comp2204510_c0_seq1	-3.85442	1.74669	28.2609	1.06017e-07	5.08677e-06
comp2261201_c0_seq1	-1.94581	2.97273	28.2478	1.06734e-07	5.11473e-06
comp2274136_c0_seq4	-1.79803	3.36177	28.2467	1.06796e-07	5.11473e-06
comp2234242_c0_seq1	-5.52815	0.160984	28.2344	1.07475e-07	5.14249e-06
comp2263586_c0_seq1	1.86348	3.87303	28.2228	1.08121e-07	5.16867e-06
comp2269058_c0_seq1	-2.61808	1.39004	28.2038	1.09192e-07	5.21507e-06
comp2225064_c0_seq1	2.43022	2.41304	28.184	1.10313e-07	5.26343e-06
comp2278311_c0_seq6	-2.21629	4.07317	28.1816	1.10449e-07	5.26343e-06
comp2269915_c0_seq3	-2.49876	4.14673	28.1806	1.10508e-07	5.26343e-06
comp2140636_c0_seq1	-1.86615	2.96593	28.1775	1.10684e-07	5.26702e-06
comp2241506_c0_seq1	-2.17934	2.24832	28.1745	1.10855e-07	5.27034e-06
comp2193984_c0_seq1	3.35842	-0.797817	28.1549	1.11986e-07	5.31924e-06
comp2263251_c1_seq2	2.64295	0.318642	28.1439	1.1262e-07	5.34427e-06
comp2265588_c0_seq1	-2.94666	0.976853	28.1422	1.12718e-07	5.34427e-06
comp2240407_c0_seq1	-2.32086	5.56615	28.1371	1.1302e-07	5.35369e-06
comp2268797_c0_seq2	-3.76058	1.40295	28.1176	1.14161e-07	5.40285e-06
comp2140778_c0_seq1	2.3921	1.60236	28.089	1.15861e-07	5.47832e-06
comp2271381_c1_seq12	-1.92115	6.76255	28.0857	1.16057e-07	5.4826e-06
comp2269301_c0_seq2	-2.57711	1.94624	28.0818	1.16295e-07	5.4854e-06
comp2276285_c0_seq3	-2.34718	2.81804	28.0813	1.16327e-07	5.4854e-06
comp2272751_c0_seq7	-2.10657	2.42153	28.0773	1.16565e-07	5.49163e-06
comp2269186_c0_seq3	-1.61168	4.05443	28.0653	1.17292e-07	5.52091e-06
comp2270870_c0_seq1	-2.24936	3.79268	28.0605	1.1758e-07	5.52943e-06
comp2247744_c0_seq2	-2.28983	2.77222	28.0289	1.19519e-07	5.61556e-06
comp2261183_c0_seq1	-2.38058	3.77654	27.9956	1.21591e-07	5.70776e-06
comp1201878_c0_seq1	-3.07308	3.6453	27.9928	1.21765e-07	5.7108e-06
comp2273879_c0_seq1	-1.72407	3.75155	27.9869	1.2214e-07	5.72319e-06
comp2261993_c0_seq1	-1.74193	7.5215	27.9847	1.22277e-07	5.72449e-06
comp2276970_c1_seq7	-1.80544	4.55337	27.9738	1.22972e-07	5.75182e-06
comp2271826_c0_seq1	-2.23376	3.2241	27.9598	1.2386e-07	5.78816e-06
comp2269145_c1_seq1	-3.16158	2.47763	27.9519	1.24368e-07	5.80672e-06
comp2250163_c0_seq2	-2.39764	1.63333	27.9482	1.24605e-07	5.81257e-06
comp2276173_c0_seq1	-1.91947	4.4003	27.9195	1.2647e-07	5.89429e-06
comp2262877_c0_seq1	-2.61589	4.29977	27.9132	1.26884e-07	5.90741e-06
comp2267069_c0_seq2	-2.53199	1.84077	27.9117	1.26979e-07	5.90741e-06
comp2263624_c0_seq10	-1.71076	4.78645	27.9034	1.27527e-07	5.92761e-06
comp2196994_c1_seq1	-3.845	0.147985	27.8946	1.28109e-07	5.94936e-06
comp2274236_c0_seq27	-1.73451	5.30128	27.8607	1.30373e-07	6.04908e-06
comp2277711_c0_seq4	-1.9423	4.52326	27.8492	1.31146e-07	6.07954e-06
gnl|Pdu_trscr_assembly_1|14998	-2.56812	1.55838	27.8435	1.31535e-07	6.08887e-06
comp2275153_c0_seq1	-2.09174	5.17124	27.8428	1.31581e-07	6.08887e-06
comp2264330_c2_seq2	-3.14085	1.27888	27.8165	1.33387e-07	6.16694e-06
comp2243820_c0_seq1	-2.68465	1.53332	27.791	1.35157e-07	6.24324e-06
comp2268383_c0_seq1	3.83666	-0.647984	27.7876	1.35394e-07	6.24863e-06
comp2265014_c0_seq1	2.53847	4.64452	27.7704	1.366e-07	6.29872e-06
gnl|Pdu_trscr_assembly_1|91767	-1.86361	2.93298	27.7676	1.36801e-07	6.3024e-06
comp2138325_c0_seq1_contamination	3.64994	3.58723	27.7649	1.36989e-07	6.30549e-06
comp2263482_c0_seq1	2.72355	1.06596	27.756	1.3762e-07	6.32674e-06
comp2277455_c0_seq2	-1.99049	2.65488	27.755	1.37694e-07	6.32674e-06
comp2101170_c0_seq2	-5.83485	0.850688	27.7344	1.39166e-07	6.38873e-06
comp2278239_c0_seq1	-1.69229	4.26692	27.7278	1.39642e-07	6.40496e-06
comp2278167_c1_seq1	-2.47424	3.38887	27.7185	1.40318e-07	6.43029e-06
comp2268718_c0_seq1	-3.64583	1.21254	27.6968	1.41898e-07	6.49696e-06
comp2254003_c0_seq1	3.13118	1.14038	27.693	1.42173e-07	6.50383e-06
comp2255890_c0_seq1	-3.64372	1.48353	27.6863	1.42668e-07	6.52075e-06
comp2138236_c0_seq1	-2.96046	0.902304	27.6442	1.45809e-07	6.6585e-06
comp2277034_c0_seq10	2.03324	3.37898	27.6387	1.46224e-07	6.67159e-06
comp2256739_c0_seq2	-3.79964	-0.263487	27.623	1.47415e-07	6.72004e-06
comp2266726_c0_seq2	-3.6576	-0.103397	27.603	1.48945e-07	6.78384e-06
comp2259371_c0_seq2	-4.55673	-0.0339479	27.5971	1.49401e-07	6.79866e-06
comp2270353_c0_seq3	-1.97507	4.71646	27.5926	1.49749e-07	6.80856e-06
comp2264550_c0_seq5	-3.20411	1.58747	27.5888	1.50048e-07	6.8162e-06
comp2275149_c1_seq1	-3.81171	3.7047	27.5652	1.51891e-07	6.89387e-06
comp2272915_c1_seq7	-1.81158	2.94274	27.561	1.52218e-07	6.89868e-06
comp2273171_c1_seq1	-2.50158	1.98424	27.5604	1.52261e-07	6.89868e-06
comp2142789_c0_seq2	-2.15322	2.40984	27.5511	1.53e-07	6.92612e-06
comp2250036_c0_seq1	-2.39542	4.23115	27.5404	1.53845e-07	6.9583e-06
comp2272091_c1_seq2	-3.15437	1.3408	27.4812	1.58628e-07	7.16841e-06
comp2274912_c0_seq4	-1.71349	6.6633	27.4775	1.58936e-07	7.17609e-06
comp2261800_c0_seq2	-3.29222	0.398478	27.4636	1.60075e-07	7.22128e-06
comp2259561_c0_seq1	-3.75364	0.0744501	27.4132	1.64306e-07	7.40351e-06
comp2264237_c0_seq1	-3.04339	1.95188	27.4121	1.64399e-07	7.40351e-06
comp2258826_c0_seq1	3.10546	0.976085	27.397	1.65688e-07	7.45509e-06
comp2277891_c0_seq4	-2.47133	3.04634	27.3887	1.66404e-07	7.48085e-06
comp2266644_c0_seq1	-2.00108	2.35521	27.3554	1.69289e-07	7.60398e-06
comp2276409_c0_seq34	-1.54349	6.44822	27.3501	1.69758e-07	7.61846e-06
comp2272458_c0_seq6	-4.13126	1.43733	27.3461	1.70105e-07	7.6189e-06
comp2264707_c0_seq1	2.67894	2.0401	27.3456	1.70155e-07	7.6189e-06
comp2253555_c0_seq1	-2.7555	0.924389	27.345	1.70206e-07	7.6189e-06
comp2278376_c0_seq1	-2.34726	6.71815	27.3359	1.7101e-07	7.6483e-06
comp2271525_c0_seq4	-2.13335	1.71565	27.326	1.71885e-07	7.6808e-06
comp2278475_c0_seq14	1.55112	6.57081	27.3155	1.72823e-07	7.71613e-06
comp2130027_c0_seq1	-2.55957	1.73228	27.3137	1.72986e-07	7.71677e-06
comp2265803_c0_seq1	-3.21598	1.16663	27.3099	1.7332e-07	7.72504e-06
comp2269539_c0_seq1	-3.973	1.07563	27.3029	1.73953e-07	7.74561e-06
comp2253109_c0_seq2	-2.46363	2.60783	27.3015	1.74079e-07	7.74561e-06
gnl|Pdu_trscr_assembly_1|90842	-2.75606	2.13778	27.261	1.77765e-07	7.90286e-06
comp2268827_c0_seq4	2.20787	1.00507	27.2509	1.78695e-07	7.93744e-06
comp2270752_c0_seq7	2.87606	3.51447	27.212	1.82327e-07	8.09187e-06
gnl|Pdu_trscr_assembly_1|7454	-1.83075	6.7605	27.2011	1.83355e-07	8.13057e-06
comp2274910_c0_seq3	-1.93076	1.91747	27.1939	1.84037e-07	8.15388e-06
comp2261571_c0_seq1	2.69069	1.27106	27.1699	1.86336e-07	8.24788e-06
comp2275871_c0_seq1	1.6316	3.02837	27.1685	1.86476e-07	8.24788e-06
comp2272814_c0_seq4	2.31026	4.82038	27.154	1.87874e-07	8.30267e-06
comp2276904_c0_seq6	2.61223	4.31562	27.1326	1.89964e-07	8.38789e-06
comp2271863_c0_seq14	-2.44815	4.99333	27.1221	1.91002e-07	8.42659e-06
comp2271448_c0_seq1	-3.82297	1.92408	27.119	1.9131e-07	8.43304e-06
comp2274534_c0_seq5	-2.22818	3.29304	27.1139	1.9181e-07	8.44792e-06
comp2257161_c0_seq1	-3.1164	3.98382	27.0646	1.96772e-07	8.65914e-06
comp1194343_c0_seq1	-1.5106	6.55593	27.0438	1.98901e-07	8.74542e-06
comp2276694_c1_seq5	-3.03487	2.17177	27.0416	1.99119e-07	8.74706e-06
comp2269871_c0_seq1	-4.29707	5.507	27.0401	1.99274e-07	8.74706e-06
comp2242712_c0_seq1	4.49858	-1.91816	27.0313	2.00189e-07	8.77983e-06
comp2263314_c1_seq1	-3.47626	2.0133	27.0026	2.03183e-07	8.90364e-06
comp2271710_c1_seq4	1.75782	6.89217	26.9972	2.03746e-07	8.92079e-06
comp2233168_c0_seq1	-4.25105	0.811644	26.97	2.06642e-07	9.03996e-06
comp2274287_c0_seq1	-2.03274	6.99018	26.959	2.07818e-07	9.08379e-06
gnl|Pdu_trscr_assembly_1|5114	-2.26903	2.17986	26.9551	2.08239e-07	9.09458e-06
comp2271348_c0_seq1	-1.51793	6.39662	26.9352	2.10391e-07	9.18085e-06
comp2256613_c0_seq1	-2.52484	5.18931	26.9158	2.12512e-07	9.26562e-06
gnl|Pdu_trscr_assembly_1|22617	-2.40098	2.0466	26.898	2.14478e-07	9.34351e-06
comp2244551_c0_seq2	-2.5468	1.58658	26.8881	2.15586e-07	9.38394e-06
comp2263831_c0_seq1	-1.77813	4.6371	26.8804	2.16446e-07	9.4135e-06
comp2258733_c0_seq1	4.27347	-0.59693	26.8553	2.19276e-07	9.52e-06
comp2277927_c0_seq1	-3.45393	1.21014	26.8547	2.19339e-07	9.52e-06
comp2274246_c0_seq1	-2.16517	5.87426	26.8538	2.19443e-07	9.52e-06
comp2260337_c0_seq2	2.51479	0.313073	26.851	2.19763e-07	9.52595e-06
comp2257395_c0_seq4	-2.54549	5.66843	26.8481	2.20085e-07	9.52653e-06
comp2253348_c0_seq1	3.16881	-0.0712663	26.8476	2.20143e-07	9.52653e-06
comp2267592_c0_seq1	2.04414	2.68892	26.8458	2.20349e-07	9.5273e-06
comp2231158_c0_seq3	-2.35117	2.95237	26.8443	2.20527e-07	9.5273e-06
comp2277610_c0_seq1	2.76418	3.37637	26.8254	2.22686e-07	9.60523e-06
comp2268445_c0_seq3	-3.42055	2.95842	26.8253	2.22699e-07	9.60523e-06
comp2269458_c0_seq2	3.05098	0.888067	26.8074	2.24779e-07	9.6869e-06
comp2259069_c0_seq3	-2.68715	2.44251	26.791	2.2669e-07	9.76119e-06
comp2254567_c0_seq2	-2.9329	1.18941	26.7837	2.27546e-07	9.78993e-06
comp2233646_c0_seq2	4.4128	-1.40808	26.7806	2.27916e-07	9.79028e-06
comp2276549_c0_seq5	-2.14035	2.14822	26.7805	2.2793e-07	9.79028e-06
comp2265341_c0_seq2	-3.13559	0.476588	26.7673	2.29482e-07	9.84882e-06
comp2243178_c0_seq2	-3.8877	-0.605774	26.7588	2.30503e-07	9.87866e-06
comp2276855_c0_seq1	-1.8623	3.11411	26.7583	2.30557e-07	9.87866e-06
comp2276141_c0_seq2	-1.93708	4.18078	26.7271	2.34317e-07	1.00315e-05
comp2232050_c0_seq1	-2.37265	1.90196	26.7191	2.35286e-07	1.00647e-05
comp2252713_c0_seq1	-2.0634	5.90001	26.7106	2.36322e-07	1.01007e-05
comp2272774_c0_seq2	-2.98889	1.11973	26.7037	2.37164e-07	1.01284e-05
comp2261982_c0_seq2	-2.22417	2.07266	26.6516	2.4365e-07	1.03969e-05
comp2220563_c0_seq2	3.32044	-0.609529	26.6051	2.49585e-07	1.06398e-05
comp2278502_c0_seq2	-1.83964	4.26827	26.6033	2.49818e-07	1.06398e-05
comp2242477_c0_seq1	-2.5542	1.33135	26.6022	2.49957e-07	1.06398e-05
comp2275022_c0_seq1	1.86787	6.9202	26.5658	2.54707e-07	1.08331e-05
comp2276437_c3_seq1	-4.62419	1.76918	26.5258	2.60045e-07	1.10512e-05
comp2235766_c0_seq1	-4.07555	1.60549	26.5219	2.60563e-07	1.10642e-05
comp2275666_c0_seq3	-1.77342	3.39462	26.5163	2.61329e-07	1.10858e-05
comp2262129_c0_seq3	2.60407	2.83693	26.515	2.61499e-07	1.10858e-05
comp2278513_c0_seq4	-1.57338	5.58577	26.4787	2.66457e-07	1.12808e-05
comp2264877_c0_seq1	-2.26988	2.35205	26.4782	2.66531e-07	1.12808e-05
comp2278218_c0_seq1	-2.06331	6.01519	26.4693	2.67766e-07	1.13238e-05
comp2233761_c0_seq1	-4.15669	0.53831	26.4655	2.6828e-07	1.13364e-05
comp2227117_c0_seq2	-1.50797	4.91346	26.4434	2.71375e-07	1.14579e-05
comp2269694_c0_seq2	-1.72138	3.43168	26.4336	2.7276e-07	1.1507e-05
comp2261977_c0_seq4	-2.1131	2.53084	26.3974	2.77911e-07	1.17148e-05
comp2268685_c0_seq1	-2.92289	2.23294	26.394	2.78408e-07	1.17263e-05
comp2275593_c0_seq1	2.55739	4.67431	26.3872	2.79381e-07	1.17577e-05
comp2265950_c0_seq7	-4.06	0.395449	26.3722	2.81563e-07	1.1834e-05
comp2273352_c0_seq2	-1.38581	6.30387	26.3716	2.81649e-07	1.1834e-05
comp2249950_c0_seq1	2.83937	0.134266	26.3603	2.83299e-07	1.18938e-05
comp2255341_c1_seq1_contamination	4.79129	2.2155	26.3451	2.85546e-07	1.19784e-05
comp1935108_c0_seq1	-2.01633	2.70103	26.3398	2.86326e-07	1.20015e-05
comp2236094_c1_seq1	-4.16505	1.0614	26.3238	2.88708e-07	1.20853e-05
comp2184756_c0_seq1	4.66717	-1.23522	26.3233	2.88789e-07	1.20853e-05
comp2273076_c1_seq5	1.56553	5.36977	26.3148	2.90063e-07	1.21288e-05
comp2261971_c0_seq1	-3.0641	5.60009	26.3029	2.91845e-07	1.21935e-05
comp2272414_c1_seq4	-3.04015	2.18321	26.2838	2.94756e-07	1.23053e-05
comp2250785_c0_seq4	-3.6521	2.43489	26.2775	2.95707e-07	1.23351e-05
comp2271312_c0_seq1	-3.54321	-0.169386	26.271	2.96704e-07	1.23668e-05
comp2243025_c0_seq2	-1.81424	4.95443	26.2671	2.97317e-07	1.23814e-05
comp2272299_c0_seq11	-1.79454	7.27345	26.2657	2.97531e-07	1.23814e-05
comp2259053_c0_seq4	-2.51384	1.08678	26.2582	2.98679e-07	1.24044e-05
comp2248557_c0_seq1	3.56748	-0.272561	26.2579	2.98737e-07	1.24044e-05
comp2275827_c0_seq3	-1.68828	4.51339	26.2575	2.98798e-07	1.24044e-05
comp2257668_c0_seq1	3.22202	-0.638354	26.2504	2.99892e-07	1.24399e-05
comp2258624_c0_seq1	-7.63315	-1.01132	26.2317	3.02812e-07	1.2551e-05
comp2263172_c0_seq5	1.73036	3.58488	26.2025	3.07421e-07	1.27281e-05
comp2275114_c0_seq6	-2.07203	3.21938	26.2016	3.07573e-07	1.27281e-05
comp2268972_c0_seq3	2.49636	3.00943	26.1842	3.10352e-07	1.28329e-05
comp2255065_c0_seq4	-3.98567	-0.0800009	26.1818	3.10738e-07	1.28386e-05
comp2269767_c0_seq1	-2.20696	2.43566	26.1686	3.12864e-07	1.29075e-05
comp2028238_c0_seq1	-1.99335	2.25668	26.1684	3.12899e-07	1.29075e-05
comp2273397_c0_seq1	-2.10377	2.28257	26.162	3.13933e-07	1.29399e-05
comp2233022_c0_seq2	-2.42338	2.13348	26.1578	3.14622e-07	1.2958e-05
comp2264504_c0_seq2	-3.27306	1.57648	26.1535	3.15333e-07	1.2977e-05
comp2261673_c1_seq1	-3.30344	0.558224	26.1493	3.16019e-07	1.2995e-05
gnl|Pdu_trscr_assembly_1|1902	2.16186	4.78533	26.118	3.21173e-07	1.31965e-05
comp1194082_c0_seq1	-1.87457	3.47437	26.101	3.24012e-07	1.33026e-05
comp2253491_c1_seq2	-3.24425	0.990533	26.0958	3.24891e-07	1.33282e-05
comp2259452_c0_seq2	-7.63525	-1.41767	26.0721	3.2891e-07	1.34825e-05
comp2278007_c0_seq1	-1.64933	4.22404	26.0316	3.35871e-07	1.37569e-05
comp2277005_c0_seq3	2.85185	4.47537	26.0275	3.36591e-07	1.37756e-05
comp2278144_c0_seq4	-1.90081	5.00158	26.0252	3.36988e-07	1.3781e-05
comp2264769_c0_seq2	-3.75329	0.282654	26.0102	3.39622e-07	1.38779e-05
comp2203809_c0_seq1	-3.91684	-0.0604607	25.999	3.41589e-07	1.39426e-05
comp2273985_c0_seq1	-2.65623	0.744653	25.9982	3.41743e-07	1.39426e-05
comp2273503_c0_seq2	-2.63063	0.752724	25.9956	3.42204e-07	1.39505e-05
comp2278366_c0_seq5	-1.73265	7.18613	25.9929	3.42682e-07	1.39591e-05
comp2277386_c0_seq2	-1.76444	5.83464	25.9547	3.49526e-07	1.42261e-05
comp2241394_c0_seq1	-5.91279	-0.52845	25.9533	3.49784e-07	1.42261e-05
gnl|Pdu_trscr_assembly_1|201059	-2.43438	1.99085	25.9449	3.513e-07	1.42766e-05
comp2257559_c0_seq1	-4.29436	-0.216367	25.9417	3.51877e-07	1.42889e-05
comp2267782_c1_seq1	2.44473	1.02027	25.8901	3.61427e-07	1.46652e-05
comp2261989_c0_seq2	-1.87066	4.76088	25.8741	3.64425e-07	1.47717e-05
comp2212838_c1_seq1	-4.07871	0.170745	25.8731	3.64618e-07	1.47717e-05
comp2269306_c0_seq2	-2.3534	1.97078	25.8709	3.65023e-07	1.47766e-05
comp2260646_c0_seq1	-2.92129	1.00937	25.8639	3.66357e-07	1.48191e-05
comp2231285_c0_seq1	-4.00367	-0.331289	25.8265	3.73521e-07	1.50901e-05
comp2279213_c0_seq1	-1.94154	7.76328	25.8259	3.73635e-07	1.50901e-05
comp2256252_c0_seq1	-1.73732	9.09184	25.8181	3.75154e-07	1.51397e-05
comp2277062_c0_seq6	2.47796	2.40434	25.8071	3.7729e-07	1.52059e-05
comp2264633_c1_seq2	-2.14992	3.02606	25.8062	3.7747e-07	1.52059e-05
comp2243881_c0_seq1	-2.18276	1.55862	25.8052	3.77672e-07	1.52059e-05
[truncated: 8,845 more rows]

## Sheet: PM_NM_Male vs M_NM_Male
	logFC	logCPM	LR	PValue	FDR
[truncated: 7,445 more rows]

[truncated: 8 more sheets: IM_FRFM vs PM_FRFM_Female, IM_FRFM vs PM_FRFM_Male, PM_NM_Female vs PM_NM_Male, M_NM_Female vs M_NM_Male, PM_FRFM_Female vs PM_FRFM_Male, IM_FRFM vs IM_NM, PM_FRFM_Female vs PM_NM_Female, PM_FRFM_Male vs PM_NM_Male]
