# Supplementary material for: Combined transcriptome and proteome profiling reveals specific molecular brain signatures for sex, maturation and circalunar clock phase
Source: eLife. 2019 Feb 15;8:e41556. doi: 10.7554/eLife.41556 (PMC6377233; doi:10.7554/eLife.41556)
Supplement: Figure 3—source data 7. — This file contains the soft clustering output of RNA expression values with Mfuzz. Each comparison, maturation, sex, and lunar contains the individual transcript ID and the membership values for each cluster ranging from 0 to 1. [file elife-41556-fig3-data7.xlsx]

## Sheet: allMaturation
	cluster	membership.1	membership.2	membership.3	membership.4	membership.5
comp1173772_c0_seq1	1	0.785129	0.00182402	0.0593363	0.151603	0.00210755
comp1174362_c0_seq1	4	0.185656	3.89404e-05	0.0240761	0.790194	3.48777e-05
comp1176849_c0_seq1	2	0.000463173	0.982647	0.000851283	0.000438981	0.0156
comp1177027_c0_seq1	3	0.154236	0.0565954	0.587173	0.173901	0.0280945
comp1177571_c0_seq1	5	0.00216048	0.391407	0.00307188	0.00221483	0.601146
comp1178039_c0_seq1	4	0.0104368	7.08505e-05	0.011827	0.977598	6.75053e-05
gnl_Pdu_trscr_assembly_1_265056	1	0.981769	4.76729e-05	0.00979603	0.00834548	4.15756e-05
comp1185751_c0_seq1	5	0.00596789	0.0757124	0.00586996	0.0059493	0.9065
comp1186209_c0_seq1	2	0.000597732	0.905129	0.000957788	0.000588903	0.0927262
gnl_Pdu_trscr_assembly_1_10282	5	0.0409441	0.143078	0.0344746	0.040877	0.740627
comp1187047_c0_seq1	1	0.902639	0.000763613	0.0605188	0.0354187	0.000660336
comp1188866_c0_seq1	4	0.199699	0.000105909	0.0307423	0.769352	0.000100767
comp1192611_c0_seq1	1	0.892163	2.51289e-05	0.0110638	0.0967253	2.30495e-05
comp1192934_c0_seq1	4	0.00148831	6.82506e-06	0.00140613	0.997092	6.55476e-06
comp1193006_c0_seq1	4	0.0261611	0.000703005	0.0613501	0.911137	0.000648522
comp1193122_c0_seq1	5	0.00104138	0.0215333	0.00100492	0.000982407	0.975438
comp1193693_c0_seq1	1	0.954331	0.000447949	0.0232589	0.0215261	0.000436549
comp1193769_c0_seq1	2	7.21479e-05	0.991689	0.000125787	7.18674e-05	0.00804113
comp1193815_c0_seq1	4	0.0605605	2.33022e-05	0.0150841	0.924311	2.06259e-05
comp1193891_c0_seq1	4	0.297313	4.77826e-05	0.021466	0.681129	4.44014e-05
comp1193915_c0_seq1	4	0.0808559	0.000107425	0.0146949	0.90423	0.000111826
comp1193922_c0_seq1_contamination	4	0.120877	0.012154	0.130694	0.720112	0.0161636
comp1193932_c0_seq1	1	0.982646	1.63552e-05	0.00945551	0.00786918	1.34098e-05
comp1193984_c0_seq1	5	0.000671654	0.0268079	0.000792208	0.000753301	0.970975
comp1194044_c0_seq1	5	0.00794341	0.114621	0.00798591	0.0080219	0.861427
comp1194078_c0_seq1	5	0.243668	0.0889067	0.103452	0.18813	0.375844
comp1194082_c0_seq1	5	8.60065e-05	0.00562729	0.000100891	9.18686e-05	0.994094
comp1194083_c0_seq1	4	0.0150109	0.000154901	0.0133976	0.971272	0.000164124
comp1194190_c0_seq1	5	0.00016513	0.0348231	0.000206408	0.000156304	0.964649
comp1194202_c0_seq1	5	0.00136415	0.118066	0.00172787	0.00138196	0.87746
comp1194215_c0_seq1	5	0.000565976	0.0580102	0.000738383	0.000601944	0.940083
comp1194244_c0_seq1	5	0.0136226	0.13793	0.0124606	0.0118221	0.824165
comp1194246_c0_seq1	2	0.00502773	0.927315	0.0114113	0.00526209	0.0509841
comp1194248_c0_seq1	4	0.277034	8.81518e-05	0.0138011	0.708983	9.41944e-05
comp1194256_c0_seq1	4	0.332363	0.00149097	0.0837715	0.580702	0.0016729
comp1194290_c0_seq1	5	0.00783846	0.187515	0.00816078	0.00717553	0.78931
comp1194293_c0_seq1	5	0.00240067	0.233707	0.00314641	0.002455	0.758291
comp1194304_c0_seq2	2	0.00418864	0.831729	0.00699721	0.00426261	0.152823
comp1194329_c0_seq1	5	0.000250112	0.0103717	0.000275181	0.000259652	0.988843
comp1194331_c0_seq1	5	0.000191783	0.076661	0.000255056	0.000190459	0.922702
comp1194334_c0_seq1	2	0.0473562	0.607922	0.151965	0.0634482	0.129309
comp1194343_c0_seq1	2	0.000241255	0.844073	0.000362966	0.000235896	0.155087
comp1194364_c0_seq1	5	0.0362242	0.123217	0.0329212	0.0454297	0.762208
comp1194375_c0_seq1	5	0.000148837	0.00929731	0.000164865	0.000140033	0.990249
comp1194390_c0_seq1	2	4.06154e-05	0.997627	7.93644e-05	4.28398e-05	0.00220978
gnl_Pdu_trscr_assembly_1_1374	4	0.121681	0.146163	0.288177	0.314363	0.129617
comp1194395_c0_seq2	2	0.000190168	0.983738	0.000348571	0.000200542	0.0155225
comp1194397_c0_seq1	1	0.796475	9.01467e-05	0.0140188	0.189322	9.37067e-05
comp1194411_c0_seq1	2	6.42124e-05	0.995812	0.000120599	6.38264e-05	0.00393926
comp1194471_c0_seq1	4	0.335601	0.000212208	0.0234391	0.640512	0.000235672
comp1194515_c0_seq1	1	0.382129	0.0261547	0.376865	0.193588	0.0212636
comp1194519_c0_seq1	1	0.893824	0.000410461	0.0188405	0.0864155	0.000509096
comp1194537_c0_seq1	2	0.00574279	0.853897	0.0118768	0.00649684	0.121986
comp1194592_c0_seq1	5	0.000324524	0.22504	0.000448563	0.000327561	0.77386
comp1194608_c0_seq1	4	0.00445596	3.63198e-05	0.00926499	0.98621	3.24058e-05
comp1194639_c0_seq1	3	0.277505	0.000781072	0.647989	0.0731955	0.000529236
comp1194937_c0_seq2	1	0.916373	0.000309871	0.0493376	0.0337172	0.000262678
comp1195006_c0_seq1	3	0.193937	0.230322	0.407593	0.10032	0.0678277
comp1195281_c0_seq2	3	0.291838	0.0673839	0.320769	0.251555	0.0684538
comp1195389_c0_seq1	5	0.0340652	0.438366	0.0421114	0.0318664	0.453591
comp1195529_c0_seq1	4	0.0464201	1.73359e-05	0.0119606	0.941587	1.54654e-05
comp1195550_c0_seq2	1	0.990473	4.32247e-05	0.00438736	0.00505523	4.08572e-05
comp1195672_c0_seq1	2	0.00277304	0.640638	0.003788	0.00254614	0.350255
comp1196568_c0_seq1	5	0.0195208	0.355492	0.021861	0.0169538	0.586172
comp1196706_c0_seq1	5	0.0025972	0.0287713	0.0023914	0.00269195	0.963548
comp1198086_c0_seq1	4	0.0409896	0.00132037	0.327272	0.629466	0.000951192
comp1198575_c0_seq1	4	0.154219	8.18147e-05	0.0147343	0.830881	8.36223e-05
comp1198911_c0_seq1	4	0.0877946	2.67143e-05	0.00938407	0.902769	2.55539e-05
comp1199108_c0_seq1	5	0.00206624	0.105893	0.00256257	0.00217325	0.887305
comp1200167_c0_seq1	5	0.000717776	0.0181132	0.000805352	0.000827808	0.979536
gnl_Pdu_trscr_assembly_1_7463	5	0.00674316	0.149204	0.00827495	0.00769296	0.828085
comp1200415_c0_seq1	5	0.0148098	0.154478	0.0144776	0.0146195	0.801615
comp1200743_c0_seq1_contamination	2	0.00312197	0.90339	0.00617899	0.00327536	0.0840333
comp1201878_c0_seq1	2	6.65025e-05	0.996318	0.000127009	6.58268e-05	0.0034229
comp1207973_c0_seq1	5	0.00440619	0.249634	0.00558912	0.00414269	0.736228
gnl_Pdu_trscr_assembly_1_1481	2	0.000408958	0.62275	0.000615743	0.000423678	0.375802
comp1267867_c0_seq1	2	9.32202e-05	0.987326	0.000158306	9.38559e-05	0.012329
comp1269972_c0_seq1	2	0.00340452	0.864295	0.00596846	0.00334249	0.122989
comp1271728_c0_seq1	2	0.00256911	0.904264	0.00490445	0.00268223	0.0855802
comp1281007_c0_seq1	5	0.000256755	0.0118672	0.000285337	0.000261101	0.98733
comp1281272_c0_seq1	5	0.00759319	0.202937	0.00805692	0.00692941	0.774483
comp1288261_c0_seq1	2	0.00073593	0.557379	0.00105873	0.00071979	0.440107
comp1291245_c0_seq1	2	0.000348498	0.984449	0.000662682	0.000341778	0.0141983
comp1294500_c0_seq1	4	0.0388861	0.000893955	0.408004	0.551566	0.00065008
comp1296583_c0_seq1	5	0.0113246	0.336338	0.0150835	0.0113788	0.625875
comp1297130_c0_seq1	5	8.48077e-05	0.00538983	9.47572e-05	8.15271e-05	0.994349
comp1311244_c0_seq1	1	0.723617	0.00338056	0.209028	0.0615323	0.00244162
comp1315948_c0_seq1	4	0.0328516	0.000947325	0.172263	0.793186	0.000751576
comp1316571_c0_seq1	4	0.0233245	7.97144e-05	0.107423	0.869111	6.20776e-05
comp1317356_c0_seq1	1	0.510861	0.068036	0.239951	0.122542	0.0586101
comp1321026_c0_seq1	1	0.932036	0.000896195	0.0281943	0.0378729	0.00100076
comp1323964_c0_seq1	4	0.0495988	0.00168833	0.214022	0.73331	0.00138142
comp1331331_c0_seq1	2	0.000277516	0.991315	0.000544474	0.000261262	0.00760131
comp1337655_c0_seq1	1	0.991234	3.05054e-05	0.00270408	0.00600014	3.14963e-05
comp1339124_c0_seq1	2	0.00116635	0.832814	0.00189602	0.00117108	0.162952
comp1341557_c0_seq1	5	0.000167032	0.0174255	0.00020675	0.00017264	0.982028
comp1368210_c0_seq1	1	0.967126	1.3128e-05	0.00652641	0.026323	1.16695e-05
comp1369760_c0_seq1	4	0.00178594	6.58192e-06	0.00229927	0.995902	5.94473e-06
comp1376985_c0_seq1	4	0.00484497	5.19876e-06	0.00180068	0.993344	4.874e-06
comp1380251_c0_seq1	5	0.000500041	0.0533778	0.000594894	0.000467462	0.94506
comp1396943_c0_seq1	4	0.0942404	5.19718e-05	0.00985901	0.895794	5.4268e-05
comp1408528_c0_seq1	4	0.202118	0.162923	0.209978	0.224843	0.200138
comp1408619_c0_seq1	5	0.00188589	0.230663	0.0024239	0.00182645	0.763201
comp1425511_c0_seq1	1	0.973377	7.62622e-05	0.016903	0.00958008	6.35503e-05
comp1442785_c0_seq1	5	0.00180046	0.0208241	0.00156939	0.00161339	0.974193
comp1443740_c0_seq1	1	0.573502	0.00133688	0.196556	0.227464	0.00114083
comp1500489_c0_seq1	2	0.0010588	0.828894	0.00182142	0.00120002	0.167026
comp1506663_c0_seq1	5	0.0139555	0.0671828	0.011129	0.0137166	0.894016
comp1508505_c0_seq1	5	0.00211155	0.0491242	0.00205194	0.00184069	0.944872
comp1531284_c0_seq1	4	0.0725162	3.64257e-05	0.0103466	0.917065	3.56186e-05
comp1565422_c0_seq1	3	0.246676	0.000823255	0.695502	0.0564841	0.000514001
gnl_Pdu_trscr_assembly_1_338836	5	0.000581645	0.152206	0.000801639	0.000621347	0.845789
comp1601248_c0_seq1	4	0.359723	0.000841824	0.039075	0.599272	0.00108726
comp1615018_c0_seq1	5	0.0054714	0.0631972	0.0059625	0.00670788	0.918661
comp1665789_c0_seq1	2	0.00203109	0.932129	0.00392454	0.0020569	0.059859
comp1692963_c0_seq1	3	0.125733	0.330965	0.384454	0.0917288	0.0671196
comp1746341_c0_seq1	4	0.0545078	0.000161321	0.0177138	0.92744	0.000177432
comp1769718_c0_seq1	2	0.000442166	0.98903	0.000942066	0.000440079	0.00914561
comp1781461_c0_seq1	5	0.00108531	0.49731	0.00170891	0.00121852	0.498678
gnl_Pdu_trscr_assembly_1_6389	5	0.000793286	0.0765815	0.000996213	0.000813958	0.920815
comp1795720_c0_seq1	1	0.497123	0.000135822	0.0439377	0.458679	0.00012497
comp1832488_c0_seq1	5	0.00263681	0.242894	0.00370565	0.00300677	0.747756
comp1847822_c0_seq1	4	0.000707493	1.14329e-06	0.000571544	0.998719	1.03174e-06
comp1867164_c0_seq1	2	0.000598313	0.968553	0.00109037	0.000590624	0.0291674
comp1875347_c0_seq1	2	0.00700375	0.511844	0.0104501	0.00697143	0.463731
comp1876805_c0_seq1	2	0.000517019	0.895403	0.000915807	0.000599159	0.102565
comp1879754_c0_seq1	5	0.0147506	0.0558986	0.0114406	0.014612	0.903298
comp1879972_c0_seq1	1	0.919771	0.000345143	0.0577635	0.0218523	0.000268001
comp1884986_c0_seq1	5	0.000306988	0.0450278	0.000420981	0.000356035	0.953888
comp1885849_c0_seq1	4	0.0455692	2.50507e-05	0.0113707	0.943012	2.28431e-05
comp1887021_c0_seq1	5	0.00835921	0.1553	0.00848983	0.00781285	0.820038
comp1887132_c0_seq1	3	0.0412768	0.000547333	0.879021	0.0788286	0.000326188
comp1888169_c0_seq2	4	0.146365	0.000483035	0.0258047	0.826734	0.000613046
comp1888429_c0_seq1	3	0.0552445	0.000158744	0.496528	0.44795	0.000118167
comp1890089_c0_seq1	1	0.63876	0.00120188	0.281824	0.0773314	0.000882963
comp1893218_c0_seq2	4	0.00948867	2.5634e-05	0.0309882	0.959477	2.06023e-05
comp1897429_c0_seq1	4	0.0244792	1.53787e-05	0.00352857	0.971961	1.56105e-05
comp1901146_c0_seq1	1	0.930441	1.99188e-05	0.00789935	0.0616213	1.83646e-05
comp1903071_c0_seq1	5	0.00107756	0.160121	0.00142094	0.00108933	0.836291
comp1903780_c0_seq1	5	0.047153	0.337446	0.0561182	0.0473913	0.511891
comp1904735_c0_seq1	3	0.25726	0.000205387	0.512594	0.22979	0.000150199
comp1908160_c0_seq1	2	0.000499104	0.98559	0.00105117	0.000516839	0.0123427
comp1908346_c0_seq1	4	0.0224164	0.000496951	0.0466307	0.92999	0.000465612
comp1909730_c0_seq1	4	0.0596899	0.00311152	0.0924217	0.841323	0.00345376
comp1912727_c0_seq1	4	0.00759907	1.41527e-05	0.00228288	0.990089	1.46092e-05
gnl_Pdu_trscr_assembly_1_88876	5	0.0118096	0.079663	0.0106833	0.0120154	0.885829
comp1914219_c0_seq1	4	0.111098	5.40525e-05	0.0097969	0.878995	5.58983e-05
comp1916133_c0_seq1	2	0.000143174	0.987966	0.000267845	0.000151773	0.0114709
comp1916779_c0_seq1	2	0.000688283	0.574289	0.00100131	0.000670298	0.423351
comp1917143_c0_seq1	5	0.0104141	0.252494	0.0144866	0.0126052	0.71
comp1918490_c0_seq1	2	0.00192659	0.716221	0.00286151	0.00181501	0.277176
comp1920273_c0_seq1	2	0.000650131	0.985336	0.00139744	0.000652956	0.0119632
comp1922843_c0_seq1	5	0.00136316	0.0857782	0.00165156	0.00137389	0.909833
gnl_Pdu_trscr_assembly_1_264336	2	0.00293076	0.9472	0.00609362	0.00291443	0.040861
gnl_Pdu_trscr_assembly_1_151157	4	0.0347404	0.000113945	0.0207166	0.944315	0.000113629
comp1923942_c0_seq1	4	0.112215	0.00253577	0.0991054	0.783473	0.00267031
comp1926910_c0_seq1	5	0.000261211	0.0364562	0.000333152	0.0002816	0.962668
comp1927232_c0_seq1	2	0.00186861	0.970994	0.00488251	0.0020916	0.0201635
comp1927433_c0_seq1	5	0.000497986	0.0696	0.000671072	0.000547003	0.928684
comp1927618_c0_seq1	4	0.428938	4.39795e-05	0.0189191	0.552058	4.092e-05
comp1928107_c0_seq1	5	0.000408349	0.134353	0.000501694	0.000357604	0.86438
gnl_Pdu_trscr_assembly_1_91078	4	0.0466701	0.00034342	0.280418	0.672307	0.00026159
comp1931832_c0_seq1	2	0.000672471	0.631642	0.00100124	0.000684414	0.366
comp1933325_c0_seq2	5	0.00363038	0.268142	0.00454269	0.00369777	0.719987
comp1934156_c0_seq1	5	0.000209857	0.0301983	0.000255684	0.000200472	0.969136
comp1934900_c0_seq1	2	0.011362	0.792004	0.0183352	0.0107865	0.167513
comp1935108_c0_seq1	2	0.00289329	0.951309	0.00675081	0.00299207	0.0360548
comp1935283_c0_seq1	4	0.129205	0.000251682	0.0272867	0.842984	0.000272858
gnl_Pdu_trscr_assembly_1_87723	2	0.000670682	0.9798	0.00133272	0.000691688	0.0175049
comp1941809_c0_seq1	4	0.378416	7.21787e-05	0.0265106	0.594933	6.85674e-05
comp1942453_c0_seq1	2	7.30936e-05	0.992716	0.00012223	6.78673e-05	0.00702087
comp1942624_c0_seq1	4	0.00634125	4.86728e-06	0.00189139	0.991758	4.56768e-06
comp1942725_c0_seq1	5	0.0106436	0.218607	0.0133683	0.0111038	0.746277
comp1943186_c0_seq1	5	8.62831e-05	0.00426887	9.23985e-05	8.28438e-05	0.99547
comp1945561_c0_seq2	2	0.000597852	0.984759	0.00122537	0.000590375	0.0128274
comp1946609_c0_seq2	2	0.000976514	0.92082	0.00167302	0.000974504	0.0755557
comp1946667_c0_seq1	4	0.240654	4.19928e-05	0.0262604	0.733006	3.76468e-05
comp1946949_c0_seq2	2	0.00123753	0.782432	0.00197234	0.00127785	0.213081
comp1949817_c0_seq2	2	0.000433592	0.984662	0.000846792	0.000422315	0.0136353
comp1949952_c0_seq1	1	0.916972	9.68245e-05	0.00874055	0.0740814	0.000109041
comp1950448_c0_seq1	2	0.000971956	0.757573	0.00136534	0.000882423	0.239207
comp1950593_c0_seq1	5	0.00156576	0.16859	0.00195068	0.00150475	0.826388
comp1951303_c0_seq1	5	5.19585e-05	0.00368455	6.13726e-05	5.45821e-05	0.996148
comp1951549_c0_seq1	2	0.00164307	0.607047	0.00235614	0.00153734	0.387417
comp1953387_c0_seq1	2	0.000118987	0.976814	0.000186045	0.000110517	0.0227703
comp1953601_c0_seq1	2	0.000218367	0.991961	0.000428608	0.000222572	0.00716994
comp1953996_c0_seq1	5	0.000311788	0.048768	0.000396715	0.000306265	0.950217
comp1954733_c0_seq1	2	0.0105996	0.801015	0.022874	0.0124007	0.153111
comp1954810_c0_seq2	5	0.0106699	0.280369	0.0150615	0.0129934	0.680906
comp1956628_c0_seq1	1	0.997505	6.85723e-06	0.00112455	0.00135733	6.29339e-06
comp1957922_c0_seq1	5	0.00108221	0.0865592	0.00140716	0.00115034	0.909801
comp1958235_c0_seq1	1	0.978667	2.8729e-05	0.00635498	0.014923	2.645e-05
comp1958245_c0_seq1	5	0.00581323	0.0674029	0.00590688	0.00617973	0.914697
gnl_Pdu_trscr_assembly_1_89185	2	0.00527648	0.74168	0.00773312	0.00494641	0.240364
comp1959397_c0_seq1	4	0.0310012	0.000813765	0.0752989	0.892144	0.000742407
comp1960799_c0_seq1	1	0.840015	0.00191552	0.03869	0.11667	0.00270977
comp1962807_c0_seq1	2	0.000658383	0.935188	0.00115782	0.000692193	0.062304
comp1962821_c0_seq1	2	0.000731499	0.940782	0.00124646	0.00071366	0.0565262
comp1963028_c0_seq1	2	0.000607088	0.979985	0.00128494	0.000641668	0.0174816
gnl_Pdu_trscr_assembly_1_10991	4	0.297443	0.000111122	0.0228641	0.679472	0.000109778
comp1964587_c0_seq1	2	3.77751e-05	0.99291	6.21432e-05	3.70652e-05	0.00695335
gnl_Pdu_trscr_assembly_1_14372	2	0.00108744	0.962283	0.00212541	0.00108817	0.0334159
comp1968131_c0_seq1	5	0.00459265	0.148292	0.00475403	0.00387713	0.838484
comp1968455_c0_seq1	2	0.00171135	0.911309	0.00289361	0.00161453	0.0824711
comp1969782_c0_seq1	1	0.853821	0.0018057	0.04786	0.0943038	0.00220981
comp1970723_c0_seq1	5	4.16505e-05	0.00340484	4.74251e-05	4.14319e-05	0.996465
comp1971890_c0_seq1	2	0.000320243	0.962035	0.000530272	0.000326325	0.0367877
comp1971911_c0_seq1	2	0.000348949	0.98749	0.000716695	0.000363081	0.0110812
gnl_Pdu_trscr_assembly_1_1296	2	0.000594753	0.699715	0.000854156	0.000554661	0.298281
gnl_Pdu_trscr_assembly_1_108870	5	0.00224396	0.0254649	0.00194915	0.00198399	0.968358
gnl_Pdu_trscr_assembly_1_950	5	0.000289371	0.14618	0.000395331	0.000289518	0.852846
comp1973581_c0_seq1	4	0.0028544	9.04015e-06	0.00198625	0.995141	8.81427e-06
comp1974124_c0_seq1	2	0.00130204	0.946644	0.00247994	0.00131208	0.0482622
comp1975390_c0_seq1	2	3.37265e-05	0.998331	6.71961e-05	3.44324e-05	0.0015339
comp1975994_c0_seq1	4	0.0109726	2.00026e-05	0.0264226	0.962568	1.62961e-05
comp1976618_c0_seq1	1	0.956843	3.41337e-05	0.0090405	0.0340504	3.21082e-05
comp1977957_c0_seq1	5	0.00110362	0.0253279	0.00122047	0.00126173	0.971086
gnl_Pdu_trscr_assembly_1_113632	1	0.967965	0.000217318	0.0117968	0.0197891	0.000231785
comp1981028_c0_seq1	2	0.0596999	0.485671	0.202254	0.104787	0.147589
comp1981288_c0_seq1	2	0.000137126	0.959469	0.000217832	0.000135951	0.0400402
comp1982469_c0_seq1	2	0.000731757	0.983518	0.00155123	0.000708983	0.0134901
gnl_Pdu_trscr_assembly_1_1263	2	0.000832246	0.899955	0.0013265	0.000810826	0.097075
comp1983510_c0_seq1	5	0.000656702	0.0316042	0.000745839	0.000646356	0.966347
comp1983525_c0_seq1	4	0.426588	0.00206919	0.0508231	0.517431	0.00308887
comp1984251_c0_seq1	5	0.00240039	0.048856	0.0027903	0.00283413	0.943119
comp1984283_c0_seq1	2	0.00131937	0.969246	0.002645	0.00128192	0.0255077
comp1984701_c0_seq1	5	0.000168552	0.0442738	0.000219711	0.000170228	0.955168
comp1985114_c0_seq1	5	5.08542e-05	0.00326176	5.62659e-05	4.82986e-05	0.996583
comp1985261_c1_seq1	2	0.000155838	0.993559	0.000302555	0.000151673	0.00583108
comp1988155_c0_seq1	2	0.00179762	0.917222	0.00323496	0.00182593	0.0759193
comp1988211_c0_seq1	2	0.000358684	0.841619	0.000559424	0.000369196	0.157094
comp1988763_c0_seq1	5	0.00144708	0.0864108	0.00190848	0.00164816	0.908585
comp1988914_c0_seq1	5	0.00401469	0.199335	0.0047511	0.00387986	0.78802
comp1989968_c0_seq1	1	0.594943	0.000934398	0.0941795	0.309046	0.000897397
gnl_Pdu_trscr_assembly_1_1056	1	0.753261	0.000954187	0.20146	0.0436612	0.00066358
comp1991283_c0_seq1	5	0.000578682	0.0223682	0.000631698	0.000553982	0.975867
gnl_Pdu_trscr_assembly_1_11029	4	0.0156722	2.46843e-05	0.00449616	0.979782	2.52838e-05
comp1996652_c0_seq1	5	0.043165	0.181806	0.0375783	0.0420223	0.695428
comp2007702_c0_seq1	1	0.944441	0.000375881	0.014808	0.0399288	0.000446434
comp2010559_c0_seq1	1	0.985018	2.93862e-05	0.00303261	0.0118887	3.08562e-05
comp2016072_c0_seq1	5	0.0151444	0.317236	0.016361	0.0122248	0.639033
comp2016467_c0_seq1	5	0.00183436	0.0381758	0.00190567	0.00182804	0.956256
comp2017894_c0_seq1	4	0.0624947	0.00259755	0.0975461	0.834643	0.00271848
comp2020617_c0_seq1	5	0.000609301	0.0169085	0.000674002	0.000661392	0.981147
comp2022008_c0_seq1	5	0.0103481	0.180202	0.0119081	0.0114054	0.786136
gnl_Pdu_trscr_assembly_1_7714	5	0.000727139	0.0392619	0.000835117	0.000728235	0.958448
comp2027371_c0_seq1	2	0.00013211	0.980565	0.00022566	0.000132822	0.0189449
comp2027901_c0_seq3	4	0.133628	0.000147591	0.0323368	0.833748	0.000140049
comp2028238_c0_seq1	5	7.35852e-05	0.0033811	8.28387e-05	7.71401e-05	0.996385
comp2034347_c0_seq1	4	0.0582878	0.00382431	0.16271	0.771685	0.00349219
comp2037149_c0_seq1	2	0.00101381	0.975945	0.00216906	0.00100896	0.0198633
comp2039141_c0_seq1	5	0.00196914	0.0391462	0.0019823	0.00186558	0.955037
comp2042029_c0_seq1	1	0.896343	0.00178155	0.05945	0.0407593	0.00166624
comp2046374_c0_seq1	1	0.878781	4.83342e-05	0.029167	0.091962	4.21025e-05
comp2049785_c0_seq1	2	0.00144616	0.949484	0.00256628	0.00133113	0.0451721
comp2052996_c0_seq1	1	0.954583	0.000459763	0.0189057	0.0255645	0.000486978
comp2054903_c0_seq1	5	0.00284106	0.253532	0.00357157	0.00256761	0.737488
comp2055425_c0_seq1	5	0.000421579	0.162367	0.00061359	0.000480773	0.836117
comp2060830_c0_seq2	2	0.000213574	0.983229	0.00037672	0.00021421	0.0159665
comp2061612_c0_seq1	4	0.0245962	0.000115009	0.0241444	0.951035	0.000109752
comp2062631_c0_seq1	2	0.00618871	0.801041	0.0101448	0.00571024	0.176915
comp2063065_c0_seq1	2	0.000535666	0.944917	0.000854213	0.00051604	0.0531766
comp2065624_c0_seq3	2	0.00155697	0.962465	0.00331178	0.00156276	0.0311032
comp2069429_c0_seq1	1	0.966462	0.000185185	0.0177042	0.0154829	0.000165936
comp2071630_c0_seq1	1	0.999075	1.27444e-06	0.000377328	0.000545751	1.13413e-06
comp2071754_c0_seq1	2	0.00055351	0.984458	0.001085	0.000540372	0.0133627
comp2077187_c0_seq1	5	0.0621353	0.242408	0.0658181	0.0692942	0.560344
comp2081623_c0_seq1	5	0.000930309	0.0159484	0.000827191	0.000798628	0.981496
comp2085371_c0_seq1	2	0.000300442	0.976239	0.000483271	0.000270702	0.0227069
comp2087499_c0_seq1	5	0.00130614	0.0231749	0.00129518	0.00132525	0.972899
comp2088138_c0_seq1	4	0.0189346	0.000175217	0.0375786	0.94316	0.00015173
gnl_Pdu_trscr_assembly_1_1986	5	0.000551593	0.0410001	0.000698458	0.000606086	0.957144
comp2094716_c1_seq1	1	0.966214	0.000120574	0.0102338	0.0233079	0.000123896
comp2095684_c0_seq1	5	0.00163425	0.185341	0.00226468	0.00175931	0.809001
comp2097010_c0_seq1	4	0.00127116	6.30277e-06	0.00148597	0.997231	5.94148e-06
gnl_Pdu_trscr_assembly_1_955	2	0.00109024	0.872029	0.0017711	0.00112247	0.123988
comp2099081_c0_seq1	5	0.00288983	0.492573	0.00416189	0.00286839	0.497507
comp2101170_c0_seq2	5	0.00598206	0.143867	0.00674344	0.00594267	0.837465
comp2102458_c0_seq1	3	0.147739	0.000147264	0.444319	0.407684	0.00011154
comp2105772_c0_seq1	3	0.214621	0.000892898	0.670593	0.11327	0.000622299
comp2107254_c0_seq1	2	0.00311021	0.653856	0.00475438	0.00314751	0.335132
comp2107458_c0_seq1	4	0.0355753	0.00116514	0.0664598	0.89564	0.00115963
comp2107597_c0_seq1	4	0.299672	0.0015204	0.252071	0.445454	0.00128333
comp2107968_c0_seq2	1	0.698696	0.000188877	0.0291872	0.271738	0.000190303
comp2108252_c0_seq1	5	0.07798	0.150355	0.0564799	0.0650536	0.650132
comp2109107_c0_seq1	1	0.962884	0.00025552	0.0136242	0.0229687	0.000267671
comp2111474_c0_seq1	1	0.80924	0.000119148	0.0532977	0.137239	0.000104569
comp2114676_c0_seq2	1	0.948808	0.00026774	0.0304004	0.0202906	0.000233516
gnl_Pdu_trscr_assembly_1_92662	2	0.000610711	0.687019	0.000928317	0.000626016	0.310816
comp2124976_c0_seq1	5	0.0267195	0.204416	0.0260836	0.0262524	0.716528
gnl_Pdu_trscr_assembly_1_86887	1	0.900367	3.91646e-05	0.0281509	0.0714093	3.3447e-05
comp2127369_c0_seq1	5	0.00013765	0.00987082	0.00015185	0.00012741	0.989712
comp2128529_c0_seq1	5	0.000160462	0.00894424	0.000181852	0.000160725	0.990553
comp2128864_c0_seq1	5	0.00312319	0.071014	0.00391051	0.00407917	0.917873
comp2130027_c0_seq1	2	0.00155228	0.919281	0.00271004	0.00151344	0.0749435
comp2133370_c0_seq2	2	0.00187093	0.838314	0.00259191	0.00154977	0.155673
comp2136393_c0_seq1	1	0.99052	1.07396e-05	0.00218586	0.00727333	1.03676e-05
comp2137193_c0_seq1	4	0.121109	3.64622e-05	0.0261969	0.852625	3.23986e-05
comp2138000_c0_seq1	2	0.00289844	0.862128	0.00516373	0.00287605	0.126934
comp2138043_c0_seq1	2	0.00788149	0.551957	0.01174	0.00847525	0.419947
comp2138058_c0_seq1	2	0.00236388	0.869652	0.00387813	0.00233271	0.121773
comp2138062_c0_seq1	4	0.477338	0.000112341	0.0212932	0.501144	0.000112346
comp2138076_c0_seq1	4	0.00127793	1.39395e-06	0.000718802	0.998001	1.26157e-06
gnl_Pdu_trscr_assembly_1_7100	2	0.0257616	0.740765	0.0393441	0.019962	0.174167
comp2138099_c0_seq1	2	0.000303996	0.991258	0.000649286	0.000308354	0.00747987
comp2138151_c1_seq1	4	0.00503636	2.4767e-05	0.011578	0.98334	2.12558e-05
comp2138157_c0_seq1	2	0.000190606	0.992991	0.000353132	0.000173446	0.00629214
comp2138236_c0_seq1	2	0.000413073	0.986439	0.00082412	0.000409258	0.0119147
comp2138261_c0_seq1	5	0.000255507	0.0382793	0.000324223	0.000254274	0.960887
comp2138264_c0_seq1	5	0.00135496	0.0306832	0.00150902	0.00157126	0.964882
comp2138273_c0_seq1	4	0.291027	0.0555955	0.140941	0.35997	0.152467
gnl_Pdu_trscr_assembly_1_7372	5	0.00808962	0.206134	0.00946496	0.00808024	0.768231
comp2138394_c0_seq1	2	0.000360163	0.942119	0.000584243	0.000357667	0.0565786
comp2138467_c0_seq1	5	0.0013363	0.32286	0.00208211	0.00158581	0.672136
comp2138515_c0_seq1	5	0.00203301	0.0262554	0.00197909	0.00208863	0.967644
comp2138523_c0_seq1	5	0.000137336	0.0420904	0.000173049	0.000132591	0.957467
gnl_Pdu_trscr_assembly_1_10952	3	0.23797	0.00396826	0.685884	0.0700755	0.00210181
comp2138556_c0_seq1	4	0.00064636	1.42405e-06	0.00052403	0.998827	1.31371e-06
comp2138577_c0_seq1	2	0.00288739	0.854937	0.00480499	0.00286248	0.134508
comp2138612_c0_seq1	2	0.00148732	0.948515	0.0027427	0.00146952	0.0457858
gnl_Pdu_trscr_assembly_1_7284	1	0.999224	9.35456e-07	0.000254035	0.000520012	8.5321e-07
comp2138680_c0_seq3	1	0.906128	5.53087e-05	0.0155547	0.0782095	5.28889e-05
comp2138717_c0_seq1	5	0.00611651	0.41393	0.00864008	0.00631053	0.565003
comp2138805_c0_seq2	5	0.00152034	0.0323189	0.0014482	0.00135758	0.963355
comp2138816_c0_seq1	2	5.66222e-05	0.997718	0.000115684	5.73435e-05	0.00205207
comp2138819_c0_seq1	2	0.00364814	0.817175	0.00553938	0.00348865	0.170149
comp2138826_c0_seq1	1	0.854835	0.000570066	0.0227271	0.121129	0.000738203
comp2138837_c0_seq1	5	0.00251341	0.0587487	0.00270662	0.00255535	0.933476
comp2138924_c0_seq1	5	0.00221599	0.0239363	0.0019493	0.00202974	0.969869
comp2138942_c0_seq1	5	0.016581	0.111123	0.0153053	0.0168836	0.840107
comp2138945_c0_seq1	4	0.246625	5.33656e-05	0.0447538	0.708521	4.63175e-05
comp2138952_c0_seq1	2	0.00132803	0.970608	0.00283883	0.00131192	0.023913
comp2138964_c0_seq1	5	6.21789e-05	0.00270886	6.36204e-05	5.69261e-05	0.997108
comp2138971_c0_seq1	5	0.000120295	0.00388375	0.000127939	0.000125893	0.995742
comp2138995_c0_seq1	4	0.00027717	6.09231e-07	0.000216622	0.999505	5.63963e-07
comp2138996_c0_seq1	5	0.00390917	0.287628	0.00513634	0.00393256	0.699393
comp2139025_c0_seq1	2	0.000672652	0.507367	0.000980131	0.000684225	0.490296
comp2139046_c0_seq1	1	0.962713	0.000303296	0.0197568	0.0169402	0.000286369
gnl_Pdu_trscr_assembly_1_2911	2	0.00118032	0.543832	0.00160985	0.00104849	0.452329
comp2139116_c0_seq1	5	0.00038825	0.0296137	0.000479203	0.000413172	0.969106
gnl_Pdu_trscr_assembly_1_12937	2	0.000299187	0.955751	0.000466086	0.000271039	0.0432124
comp2139123_c0_seq1	5	0.00387504	0.243007	0.00485514	0.00365616	0.744606
comp2139157_c0_seq1	2	0.000275021	0.982701	0.000448996	0.000236601	0.0163381
comp2139322_c0_seq1	4	0.0116386	2.48456e-05	0.00380098	0.984509	2.6123e-05
comp2139506_c0_seq1	4	0.0102202	7.9947e-06	0.00478852	0.984976	7.11641e-06
comp2139514_c0_seq1	5	0.000264433	0.0142149	0.000302525	0.000266887	0.984951
comp2139590_c0_seq1	4	0.0319832	0.00106168	0.0732461	0.892713	0.000995995
gnl_Pdu_trscr_assembly_1_89738	5	0.00298632	0.377427	0.00372472	0.00268134	0.61318
comp2139708_c0_seq1	5	0.000855618	0.199646	0.00114989	0.00083946	0.797509
comp2139723_c0_seq1	2	0.00216023	0.861526	0.00390532	0.00239528	0.130013
comp2139746_c0_seq2	2	0.00171855	0.893747	0.00283467	0.0016959	0.100004
comp2139772_c0_seq1	5	0.000880822	0.0232818	0.000887661	0.000803345	0.974146
comp2139868_c0_seq1	5	0.00050904	0.0154078	0.000549191	0.000532727	0.983001
comp2140131_c0_seq1	4	0.00305531	4.1125e-06	0.000940251	0.995996	4.08962e-06
comp2140166_c0_seq1	4	0.0289595	0.000594776	0.2641	0.705909	0.000436837
comp2140173_c0_seq1	2	0.00144921	0.930135	0.00284857	0.00166877	0.0638989
comp2140180_c0_seq1	2	0.000390128	0.887679	0.00059499	0.000367838	0.110968
comp2140200_c0_seq1	2	0.000389105	0.974673	0.000688817	0.000381875	0.023867
comp2140238_c0_seq1	4	0.00929044	1.067e-05	0.00362636	0.987062	1.00672e-05
comp2140245_c0_seq1	5	0.00115181	0.017702	0.00111797	0.00116405	0.978864
comp2140276_c0_seq1	5	0.00159063	0.0317553	0.00163032	0.0015899	0.963434
comp2140307_c0_seq1	2	0.00273714	0.94041	0.00542648	0.00274373	0.048683
comp2140431_c0_seq1	5	0.000715987	0.0985572	0.000899888	0.000711896	0.899115
comp2140459_c0_seq2	1	0.997597	1.82693e-06	0.000719075	0.00167998	1.62777e-06
comp2140493_c0_seq1	5	0.0109878	0.205409	0.0119496	0.0104809	0.761173
comp2140537_c0_seq1	1	0.941168	0.000128755	0.0379528	0.0206472	0.00010322
comp2140539_c0_seq1	5	0.00496332	0.0394382	0.00402294	0.00427495	0.947301
comp2140544_c0_seq1	4	0.00680179	3.5354e-05	0.0102084	0.982923	3.17977e-05
gnl_Pdu_trscr_assembly_1_20865	5	0.000235218	0.0522498	0.000296774	0.000224701	0.946993
comp2140636_c0_seq1	5	0.000305214	0.183475	0.000422357	0.000306387	0.815491
comp2140647_c0_seq2	5	0.00963154	0.257708	0.0112735	0.00965004	0.711737
comp2140683_c0_seq1	5	0.00912462	0.206835	0.00950415	0.00830995	0.766227
comp2140776_c0_seq1	2	0.00318094	0.529488	0.00517572	0.00383069	0.458324
comp2140778_c0_seq1	4	0.00591395	5.1058e-05	0.00700675	0.986978	5.02202e-05
comp2140791_c0_seq1	5	0.000407208	0.0464018	0.000482103	0.000376076	0.952333
comp2140816_c0_seq1	5	0.00498537	0.270053	0.00651127	0.00517883	0.713272
comp2140836_c0_seq1	4	0.145771	0.000177153	0.170135	0.683773	0.000142858
comp2141175_c0_seq1	5	0.000362675	0.199738	0.000501909	0.000364556	0.799033
comp2141229_c0_seq1	5	0.000251349	0.0260272	0.000318981	0.000269351	0.973133
gnl_Pdu_trscr_assembly_1_92439	2	0.0113938	0.658916	0.0190927	0.0118972	0.2987
comp2141370_c0_seq1	5	0.000583375	0.0143919	0.000591861	0.000569492	0.983863
comp2141469_c0_seq1	4	0.101325	6.46899e-05	0.0115426	0.887	6.72292e-05
comp2141503_c0_seq1	5	0.00283884	0.028005	0.00253338	0.00271819	0.963905
comp2141558_c0_seq1	4	0.212015	0.00186586	0.253496	0.531023	0.0016008
comp2141643_c0_seq1	5	0.00590239	0.436887	0.00783	0.00541977	0.543961
comp2141694_c0_seq1	3	0.20695	0.000192369	0.489065	0.303645	0.000147041
comp2141714_c0_seq1	1	0.904897	2.52784e-05	0.0125567	0.082498	2.27916e-05
comp2141716_c0_seq3	4	0.188477	0.00170345	0.0584464	0.749166	0.00220707
comp2141733_c0_seq1	5	0.000185504	0.00641437	0.00019074	0.000175196	0.993034
comp2141837_c0_seq1	4	0.324562	0.00346861	0.0675002	0.599204	0.00526527
comp2141895_c0_seq2	2	0.00131706	0.59334	0.00184482	0.00126595	0.402232
gnl_Pdu_trscr_assembly_1_4796	2	0.000541352	0.936212	0.000846592	0.000492577	0.0619073
comp2141958_c0_seq2	1	0.999589	5.05237e-07	0.000134291	0.000275596	4.62971e-07
comp2141997_c0_seq1	5	0.00162229	0.248961	0.00232665	0.00179122	0.745299
comp2142011_c0_seq1	3	0.0963624	0.000657942	0.590472	0.312026	0.000481633
comp2142021_c1_seq1	3	0.112008	0.00722528	0.515919	0.359788	0.0050594
comp2142030_c0_seq1	1	0.878392	0.00087064	0.0445623	0.0752625	0.000912642
comp2142040_c0_seq1	2	0.0162213	0.840196	0.0434932	0.0187169	0.0813723
comp2142068_c0_seq1	2	7.96103e-05	0.996549	0.000162396	8.20966e-05	0.00312721
comp2142074_c0_seq1	4	0.140481	0.00563763	0.116232	0.730377	0.0072731
comp2142128_c0_seq1	2	0.000443872	0.984827	0.000888545	0.000443883	0.0133966
gnl_Pdu_trscr_assembly_1_14840	5	0.0323729	0.0744007	0.0222308	0.0316305	0.839365
comp2142314_c0_seq2	5	0.000428505	0.0627103	0.000527348	0.000401954	0.935932
comp2142340_c0_seq1	2	0.000940052	0.955299	0.00168154	0.000920303	0.0411596
comp2142425_c0_seq1	1	0.989424	3.18085e-05	0.00562986	0.00488681	2.7973e-05
comp2142434_c0_seq1	2	0.000398728	0.642472	0.000590337	0.000404865	0.356134
comp2142438_c0_seq1	1	0.479431	0.000309323	0.379378	0.140652	0.000229223
comp2142514_c0_seq2	2	0.00217829	0.748197	0.00326912	0.00215989	0.244196
comp2142543_c0_seq1	2	0.000645309	0.566794	0.000939925	0.000635364	0.430985
comp2142559_c0_seq1	1	0.709969	0.00203984	0.217624	0.0688709	0.00149659
comp2142601_c0_seq1	5	0.00273851	0.0271766	0.00238149	0.00251428	0.965189
comp2142602_c0_seq1	5	0.000218325	0.00991365	0.000229924	0.000207943	0.98943
comp2142609_c0_seq2	1	0.535879	0.00118476	0.0401674	0.421118	0.00165096
comp2142646_c0_seq4	5	0.00605114	0.0452598	0.00551608	0.00619705	0.936976
comp2142660_c0_seq1	4	0.0376043	0.000202418	0.0132576	0.948697	0.00023843
comp2142739_c0_seq1	1	0.870377	0.00128607	0.0903643	0.0369513	0.00102081
comp2142743_c0_seq3	2	0.00233279	0.868357	0.00439658	0.0026447	0.122269
comp2142763_c0_seq1	5	6.03758e-05	0.0028739	6.69076e-05	6.10681e-05	0.996938
comp2142773_c0_seq1	5	0.00101061	0.021653	0.001073	0.00104811	0.975215
comp2142776_c0_seq1	5	0.0206969	0.0951911	0.0165005	0.0194934	0.848118
comp2142789_c0_seq2	5	9.95285e-05	0.00549788	0.00010753	9.44022e-05	0.994201
comp2142794_c0_seq1	2	0.00287307	0.609739	0.00400572	0.00279535	0.380587
comp2142807_c0_seq1	2	8.56172e-05	0.996516	0.000166629	8.51617e-05	0.0031466
comp2142810_c0_seq2	2	0.00311892	0.909091	0.00577814	0.00313017	0.0788817
comp2142831_c0_seq2	5	0.00192786	0.034147	0.00201757	0.00208773	0.95982
comp2142832_c0_seq1	2	0.00395947	0.941068	0.00992123	0.00470777	0.0403437
comp2142853_c0_seq1	5	0.00201824	0.0945943	0.00266362	0.00242837	0.898295
comp2142866_c0_seq1	2	0.00455393	0.753212	0.00892355	0.00593809	0.227372
comp2142899_c0_seq1	3	0.0150067	0.000391836	0.906677	0.0776983	0.000226162
comp2142927_c0_seq1	2	5.97171e-05	0.9913	0.000102947	6.15098e-05	0.00847554
comp2142969_c0_seq1	4	0.00313629	1.85871e-05	0.00548461	0.991344	1.68866e-05
comp2143063_c0_seq1	4	0.217303	0.00560074	0.0844115	0.683863	0.00882177
comp2143145_c0_seq4	4	0.0190768	9.63481e-05	0.0450174	0.935727	8.2407e-05
comp2143146_c0_seq1	4	0.116643	0.000426135	0.0229394	0.859456	0.000536201
comp2143160_c0_seq1	4	0.0118166	1.65898e-05	0.00475795	0.983393	1.58826e-05
comp2143185_c0_seq1	3	0.0896094	0.000152954	0.838196	0.0719355	0.000106334
comp2143231_c0_seq1	4	0.0303739	3.13009e-05	0.0129301	0.956636	2.8689e-05
gnl_Pdu_trscr_assembly_1_14023	4	0.0160613	0.000269036	0.0325668	0.950852	0.000250715
comp2143334_c0_seq2	5	0.000901891	0.187262	0.00128014	0.000997814	0.809558
comp2143340_c0_seq1	2	0.000347931	0.888213	0.000548226	0.000344435	0.110547
comp2143351_c0_seq1	5	0.225488	0.081096	0.115481	0.260026	0.317908
comp2143377_c1_seq1	2	0.00238299	0.633578	0.00302169	0.00197603	0.359041
comp2143410_c0_seq1	4	0.0363636	0.00112636	0.45997	0.501776	0.000764162
comp2143430_c0_seq1	5	0.00122784	0.0254837	0.00126896	0.0012258	0.970794
comp2144864_c1_seq1	4	0.00830151	2.74002e-05	0.0115651	0.980082	2.38414e-05
comp2146245_c0_seq1	4	0.0236225	0.000254319	0.0200125	0.955835	0.000275353
comp2146773_c0_seq2	1	0.988852	5.09351e-05	0.00563505	0.00541463	4.69558e-05
comp2146858_c0_seq1	5	0.000375881	0.139487	0.000494654	0.000376375	0.859266
comp2146953_c0_seq1	1	0.576225	6.11255e-05	0.0382364	0.385424	5.37267e-05
comp2148606_c0_seq1	2	0.00174507	0.911335	0.0028199	0.00160587	0.0824942
comp2149705_c0_seq1	5	0.00268988	0.341397	0.00351312	0.00268808	0.649712
comp2150474_c0_seq1	4	0.0188025	0.000366392	0.0727734	0.907752	0.000305779
comp2151930_c0_seq1	4	0.417082	5.62261e-05	0.0231354	0.559675	5.21335e-05
gnl_Pdu_trscr_assembly_1_264567	1	0.592188	0.00017333	0.0282463	0.379217	0.000175861
comp2154037_c0_seq1	2	0.00426089	0.777107	0.00679206	0.00400139	0.207839
comp2154128_c0_seq1	5	0.00015151	0.0270451	0.000192834	0.000153131	0.972457
comp2154653_c0_seq1	1	0.940239	0.000283738	0.0395994	0.0196472	0.000230393
comp2155820_c0_seq1	1	0.788339	0.00114514	0.157195	0.0524738	0.000846467
comp2155984_c0_seq2	4	0.0673274	0.00190581	0.177299	0.751806	0.00166146
comp2156066_c0_seq1	1	0.945836	0.000442113	0.0213976	0.0318625	0.000461699
comp2156804_c0_seq1	2	0.0138809	0.701636	0.0206557	0.0130549	0.250773
comp2157231_c0_seq1	4	0.276412	0.00503297	0.0871984	0.623709	0.00764719
comp2158525_c0_seq1	5	0.00303785	0.476172	0.00383402	0.00260265	0.514354
comp2158971_c0_seq1	1	0.764537	0.00985963	0.138096	0.0785166	0.00899075
comp2159913_c0_seq2	5	0.000320443	0.00955388	0.000333351	0.000320484	0.989472
comp2160185_c0_seq1	4	0.056122	0.00229814	0.0748782	0.864172	0.00252936
comp2160442_c0_seq1	2	0.000834127	0.981006	0.00177259	0.000812343	0.0155745
gnl_Pdu_trscr_assembly_1_88882	1	0.998142	4.39942e-06	0.000828143	0.00102152	3.99158e-06
comp2166111_c0_seq1	5	0.100529	0.163132	0.0744141	0.0970091	0.564916
comp2173693_c0_seq1	1	0.887993	2.4074e-05	0.0101214	0.10184	2.22509e-05
comp2176475_c0_seq1	1	0.998029	4.59986e-06	0.000878447	0.00108359	4.18031e-06
comp2177447_c0_seq1	5	0.0015981	0.0247644	0.00149825	0.00154927	0.97059
comp2178895_c0_seq1	2	0.0156587	0.565857	0.0227012	0.0154044	0.380378
comp2179803_c0_seq1	5	0.00591364	0.120915	0.00619224	0.00583078	0.861148
comp2180515_c1_seq1	5	0.014676	0.0735909	0.0120069	0.0145042	0.885222
comp2184390_c0_seq1	5	0.0108442	0.0737359	0.00926693	0.010076	0.896077
comp2184435_c0_seq1	5	0.000534109	0.0586439	0.000608298	0.000481033	0.939733
comp2184659_c0_seq1	3	0.124092	0.1069	0.617587	0.117683	0.0337373
gnl_Pdu_trscr_assembly_1_214123	2	0.00180238	0.706453	0.00258627	0.00175018	0.287408
comp2184756_c0_seq1	4	0.0605833	1.81616e-05	0.00910347	0.930278	1.6655e-05
comp2184876_c0_seq2	5	0.000453946	0.0785648	0.000547966	0.000421745	0.920012
comp2185299_c0_seq1	1	0.998923	1.23568e-06	0.00027368	0.000800843	1.17397e-06
comp2185368_c0_seq1	5	0.00374057	0.0539894	0.00359298	0.00370298	0.934974
comp2185740_c0_seq1	1	0.986672	2.73962e-05	0.00632398	0.00695273	2.42345e-05
comp2185804_c0_seq1	5	0.0594433	0.131657	0.0421247	0.0544759	0.712299
gnl_Pdu_trscr_assembly_1_88528	1	0.493792	0.00549737	0.0804085	0.411516	0.00878564
comp2186478_c0_seq1	3	0.138676	0.0190096	0.759584	0.0750002	0.00773061
comp2186746_c0_seq1	1	0.923093	0.000960434	0.0413234	0.0337051	0.000918007
comp2187328_c0_seq1	2	0.000314855	0.991698	0.00066615	0.000320116	0.00700068
comp2187751_c0_seq1	4	0.133003	0.00045407	0.0246384	0.841338	0.000566727
comp2188296_c0_seq1	5	0.000391689	0.129505	0.000545991	0.000421859	0.869135
comp2188428_c0_seq1	5	0.00209542	0.117726	0.00239252	0.00203506	0.875751
comp2188572_c0_seq1	3	0.039001	0.00209967	0.854734	0.103022	0.00114339
comp2188679_c0_seq1	5	0.00360118	0.0485315	0.00349945	0.00358723	0.940781
comp2188826_c0_seq1	5	0.0986959	0.291689	0.118242	0.101432	0.389941
comp2188878_c0_seq2	5	0.175234	0.131452	0.117955	0.193238	0.382122
comp2189190_c0_seq1	5	0.00343418	0.0341683	0.00297467	0.00309837	0.956325
comp2189631_c0_seq1	1	0.72978	5.63569e-05	0.0220392	0.248071	5.28921e-05
comp2189739_c0_seq1	2	0.00263047	0.85117	0.00482587	0.00287637	0.138498
comp2189817_c0_seq2	2	0.000111473	0.995666	0.00020882	0.000104689	0.00390902
comp2190140_c0_seq1	4	0.00709892	2.89981e-05	0.0097105	0.983136	2.57148e-05
comp2190259_c0_seq1	2	0.00164452	0.71923	0.0023772	0.00156539	0.275183
comp2190307_c0_seq2	5	0.000212168	0.00812974	0.000215592	0.000196004	0.991246
comp2190329_c0_seq1	1	0.991601	1.88725e-05	0.0023485	0.00601225	1.92155e-05
comp2190469_c0_seq1	5	0.00842798	0.0559499	0.00764265	0.0087473	0.919232
comp2190681_c0_seq1	1	0.87989	0.00225422	0.0518337	0.0635414	0.00248037
comp2190979_c0_seq1	2	0.00767521	0.817668	0.0146109	0.00843897	0.151607
comp2191227_c0_seq1	4	0.0465174	0.000984842	0.404045	0.547737	0.000715941
comp2191516_c0_seq1	2	0.00111722	0.888214	0.00178028	0.00105601	0.107832
gnl_Pdu_trscr_assembly_1_159181	3	0.139121	0.212303	0.306572	0.200675	0.14133
comp2191837_c0_seq1	5	0.00775058	0.297937	0.00889936	0.007089	0.678324
comp2191855_c0_seq1	4	0.344737	6.15595e-05	0.049556	0.605592	5.36767e-05
comp2191864_c0_seq1	4	0.0647667	7.86685e-05	0.0124484	0.922626	8.02478e-05
comp2192093_c0_seq2	2	0.000890971	0.831152	0.00130447	0.000824272	0.165828
comp2192120_c0_seq1	1	0.99726	6.56197e-06	0.00091755	0.00180933	6.31335e-06
comp2192188_c0_seq2	3	0.0659793	0.000239522	0.898668	0.0349625	0.000150897
comp2192355_c0_seq1	1	0.50979	5.5746e-05	0.0317808	0.458324	4.99289e-05
comp2192374_c0_seq2	1	0.868218	0.000446736	0.0985695	0.0324306	0.000334727
comp2192575_c0_seq1	2	0.00126704	0.899152	0.00204117	0.00121658	0.0963236
comp2192779_c0_seq1	5	0.000196956	0.00593543	0.000204617	0.00019434	0.993469
comp2193065_c0_seq1	1	0.488321	0.00286223	0.416926	0.089925	0.00196636
comp2193499_c0_seq1	2	0.000209713	0.981389	0.000341287	0.000190773	0.0178689
comp2193513_c0_seq1	1	0.998778	2.30878e-06	0.000507432	0.000709684	2.08513e-06
comp2193521_c0_seq1	5	0.000191902	0.00759548	0.00020426	0.000190256	0.991818
comp2193809_c0_seq1	4	0.0297095	4.269e-05	0.039801	0.930411	3.55948e-05
comp2193984_c0_seq1	4	0.000348902	6.00189e-07	0.000178783	0.999471	5.74216e-07
comp2194038_c0_seq1	1	0.836363	0.00455878	0.0939289	0.0608318	0.00431746
comp2194151_c0_seq1	2	0.00136349	0.936645	0.00230196	0.00134185	0.0583479
comp2194193_c0_seq1	4	0.0430787	0.000200736	0.065582	0.890959	0.000180025
comp2194542_c0_seq2	4	0.0229296	0.000128255	0.0135119	0.963299	0.000131448
comp2194633_c0_seq2	4	0.301171	0.000752577	0.0416011	0.655556	0.000919219
comp2194677_c0_seq1	5	0.000469956	0.0322884	0.000541938	0.000442571	0.966257
comp2195144_c0_seq1	1	0.977933	0.000105366	0.0115021	0.0103632	9.59463e-05
comp2195155_c0_seq1	1	0.993715	8.44889e-06	0.00217219	0.0040968	7.66413e-06
comp2195212_c0_seq1	2	0.00116191	0.97988	0.00272783	0.00119533	0.0150348
comp2195493_c0_seq1	2	0.00181929	0.518598	0.00255953	0.00175469	0.475268
comp2195994_c0_seq1	2	0.000694657	0.983134	0.00142679	0.000671349	0.0140732
comp2196066_c0_seq1	2	0.00194383	0.908785	0.00350345	0.00193231	0.0838357
comp2196076_c0_seq1	5	0.0149932	0.13959	0.0141157	0.0143134	0.816987
comp2196994_c1_seq1	2	0.000419965	0.969731	0.000713246	0.000394789	0.0287414
comp2197129_c0_seq1	2	0.0239308	0.629507	0.0385397	0.0239209	0.284102
comp2197309_c0_seq1	2	0.00221687	0.65376	0.00356064	0.00234174	0.33812
comp2197313_c0_seq2	4	0.0120693	0.000100944	0.0336621	0.954083	8.48917e-05
comp2197328_c0_seq1	5	0.00428157	0.0363608	0.00361496	0.003802	0.951941
comp2197333_c0_seq1	2	0.00377568	0.688463	0.00600493	0.00404411	0.297712
comp2197345_c0_seq1	4	0.335131	7.81147e-05	0.0281366	0.636582	7.24086e-05
comp2197371_c0_seq1	4	0.00385296	2.87958e-05	0.00649475	0.989597	2.62886e-05
comp2197443_c0_seq1	1	0.791549	0.00263779	0.0498204	0.152277	0.00371634
comp2197576_c0_seq1	5	0.00138355	0.0458927	0.00146044	0.00129025	0.949973
comp2197643_c0_seq1	5	0.00104535	0.41464	0.00145729	0.00106722	0.58179
comp2197679_c0_seq1	5	0.000118007	0.00555222	0.000130391	0.000116771	0.994083
comp2197726_c1_seq1	2	0.164609	0.281977	0.272673	0.148773	0.131968
comp2197780_c0_seq1	5	0.000148896	0.0118933	0.000166354	0.000136577	0.987655
comp2197782_c0_seq1	5	0.00226522	0.0862603	0.00280645	0.00252513	0.906143
comp2197826_c0_seq1	4	0.0263104	0.000710983	0.0642682	0.90806	0.000650617
comp2198016_c0_seq1	5	0.000195646	0.0116608	0.000236661	0.000217021	0.98769
comp2198075_c0_seq1	1	0.984855	7.33386e-06	0.00226679	0.0128638	6.88522e-06
comp2198297_c0_seq1	2	0.000759624	0.643164	0.00106922	0.000699094	0.354308
comp2198297_c1_seq1	2	0.000569856	0.95762	0.000899093	0.000493497	0.0404179
comp2198383_c0_seq1	5	0.0243141	0.0704405	0.0170995	0.0222969	0.865849
comp2198403_c0_seq2	2	0.000206376	0.99258	0.000410951	0.000201066	0.00660129
comp2198530_c0_seq1	1	0.994978	5.88401e-06	0.00243028	0.00258032	5.02559e-06
comp2198618_c0_seq2	2	0.00126852	0.869832	0.00193949	0.00122686	0.125733
comp2198640_c0_seq1	1	0.951048	0.000340254	0.0182374	0.0300193	0.0003547
comp2198732_c0_seq2	2	0.00123813	0.949929	0.00216075	0.00116089	0.0455115
comp2198785_c0_seq2	4	0.0678947	0.000129882	0.050465	0.881396	0.000114943
comp2198797_c0_seq2	2	0.000715478	0.980501	0.00143544	0.000703164	0.0166451
gnl_Pdu_trscr_assembly_1_333447	4	0.0760995	0.000202446	0.243877	0.679664	0.000157329
comp2198805_c0_seq1	2	0.0152207	0.88105	0.036528	0.0123841	0.054817
comp2198857_c0_seq2	5	4.85005e-05	0.00241224	5.33999e-05	4.84582e-05	0.997437
gnl_Pdu_trscr_assembly_1_8076	5	0.000147602	0.0369354	0.000196858	0.000153623	0.962566
comp2198934_c0_seq1	1	0.620689	0.00434355	0.169105	0.201611	0.0042511
comp2199122_c0_seq1	5	0.00781304	0.0795774	0.00747528	0.00771079	0.897423
comp2199123_c0_seq1	2	0.000555338	0.820784	0.00086697	0.000557194	0.177237
comp2199259_c0_seq2	5	0.000108192	0.00420471	0.000114002	0.000106665	0.995466
comp2199263_c0_seq2	5	0.010096	0.0785203	0.00927062	0.0104395	0.891674
comp2199445_c0_seq3	2	0.000288527	0.980664	0.000524678	0.00028951	0.0182336
comp2199471_c0_seq1	5	0.0130619	0.0729499	0.0107828	0.0123832	0.890822
comp2199649_c0_seq2	2	0.000232982	0.993902	0.000504339	0.00023248	0.00512855
gnl_Pdu_trscr_assembly_1_91767	5	2.36001e-05	0.00311257	2.8297e-05	2.33761e-05	0.996812
comp2199752_c0_seq1	3	0.0417878	0.000200605	0.847821	0.110056	0.000134222
comp2199795_c0_seq1	1	0.512471	0.00015457	0.0747994	0.412438	0.000137602
comp2199830_c0_seq1	4	0.331504	0.00844707	0.0909261	0.553666	0.0154562
comp2199879_c0_seq1	2	0.00772295	0.694274	0.0130343	0.00787564	0.277093
comp2199938_c0_seq1	2	0.000256832	0.991245	0.000562377	0.000285351	0.00764996
comp2200005_c0_seq2	3	0.376836	0.0242501	0.469446	0.1147	0.0147677
comp2200112_c1_seq1	2	0.00043371	0.933254	0.000720894	0.000448576	0.0651431
comp2200124_c0_seq1	4	0.0104951	0.000104759	0.038632	0.950681	8.7209e-05
comp2200144_c0_seq1	5	0.0212263	0.07025	0.0158143	0.0211397	0.87157
comp2200203_c0_seq1	1	0.681122	0.00186213	0.261229	0.0545199	0.00126615
comp2200224_c0_seq2	2	0.00118001	0.632816	0.0015431	0.000982807	0.363478
comp2200316_c0_seq1	1	0.999332	6.49914e-07	0.00021276	0.000453533	5.88431e-07
comp2200361_c0_seq1	1	0.6339	0.000200697	0.178532	0.187204	0.000163073
comp2200386_c0_seq5	1	0.504444	5.98043e-05	0.0387788	0.456664	5.32459e-05
gnl_Pdu_trscr_assembly_1_3048	2	0.00040726	0.982132	0.000722549	0.000389798	0.0163484
comp2200430_c0_seq3	5	0.000222086	0.020771	0.000262297	0.000216486	0.978528
comp2200465_c0_seq2	4	0.00784631	1.03869e-05	0.00912495	0.98301	8.84653e-06
comp2200669_c0_seq1	5	4.1659e-05	0.00222903	4.51663e-05	4.08718e-05	0.997643
comp2200738_c0_seq1	4	0.00962825	7.73189e-05	0.0298535	0.960376	6.5007e-05
comp2200791_c0_seq1	2	0.00126571	0.877134	0.00205733	0.00122109	0.118322
comp2200971_c0_seq1	5	0.000491022	0.475924	0.000696213	0.000478386	0.52241
comp2200976_c0_seq2	4	0.00935238	5.779e-06	0.00285159	0.987785	5.28734e-06
comp2200987_c0_seq1	1	0.973549	0.000179304	0.0120677	0.014028	0.000175553
comp2201214_c0_seq1	5	0.00208271	0.376754	0.00296463	0.00214641	0.616053
comp2201252_c0_seq1	5	0.0114085	0.154041	0.0117723	0.0113865	0.811391
comp2201258_c0_seq1	4	0.00185983	1.92944e-06	0.00104498	0.997092	1.73009e-06
comp2201565_c0_seq1	1	0.824236	3.56264e-05	0.0113456	0.164348	3.4424e-05
comp2201579_c0_seq1	5	0.000436432	0.0349016	0.000504461	0.000422251	0.963735
comp2201594_c0_seq1	4	0.000204568	4.40769e-07	0.000135907	0.999659	4.16591e-07
comp2201620_c0_seq2	2	0.00348896	0.929686	0.00701394	0.00338197	0.0564296
comp2201755_c0_seq1	2	0.00156545	0.908898	0.00256903	0.00149574	0.085472
comp2201786_c0_seq1	5	0.00287448	0.0474485	0.00318742	0.00338689	0.943103
comp2201951_c0_seq1	5	0.0850083	0.279479	0.0933132	0.0823773	0.459822
comp2202050_c0_seq3	2	0.00235957	0.732798	0.00362757	0.00233179	0.258883
gnl_Pdu_trscr_assembly_1_9435	5	0.00563306	0.0704349	0.0053327	0.00533983	0.913259
comp2202102_c0_seq1	2	0.00087021	0.977284	0.00195963	0.000982491	0.0189034
comp2202216_c0_seq1	5	0.012806	0.459362	0.0183237	0.013276	0.496232
comp2202265_c0_seq3	5	0.00264995	0.0761472	0.00293575	0.00271556	0.915552
comp2202284_c0_seq1	2	0.00308965	0.750085	0.00504976	0.00334166	0.238434
comp2202319_c1_seq1	5	0.00421524	0.339838	0.00563752	0.00421047	0.646099
comp2202353_c0_seq1	1	0.907554	0.00035396	0.0170425	0.0746147	0.00043526
comp2202419_c0_seq1	5	0.00912835	0.0793348	0.00844453	0.00909656	0.893996
comp2202423_c0_seq2	2	0.000779879	0.936249	0.00126664	0.00075819	0.060946
gnl_Pdu_trscr_assembly_1_1291	2	0.00149022	0.932582	0.00270852	0.00150934	0.0617101
comp2202480_c0_seq2	2	0.0207814	0.780964	0.0400199	0.0200501	0.138184
comp2202638_c0_seq1	2	0.104929	0.395845	0.320284	0.0917532	0.0871886
comp2202652_c0_seq2	4	0.00450492	5.67498e-06	0.00344951	0.992035	4.97906e-06
comp2202679_c0_seq1	2	0.00910554	0.876093	0.0219487	0.010874	0.0819784
comp2202755_c0_seq1	2	0.00535397	0.715826	0.00738791	0.00451029	0.266921
comp2202767_c0_seq1	5	0.0233706	0.182068	0.0222645	0.0215613	0.750736
gnl_Pdu_trscr_assembly_1_1344	4	0.0118781	7.0168e-05	0.0619462	0.92605	5.54333e-05
comp2203047_c0_seq1	4	0.222449	0.0038248	0.0637207	0.703901	0.00610441
comp2203085_c0_seq1	1	0.726966	8.13027e-05	0.0138493	0.259019	8.43433e-05
comp2203146_c0_seq1	5	0.000482705	0.0150911	0.000492673	0.000457304	0.983476
gnl_Pdu_trscr_assembly_1_267447	2	0.00162144	0.806493	0.00226899	0.00142772	0.188189
comp2203727_c0_seq2	2	0.0514496	0.585242	0.195634	0.0739128	0.0937612
comp2203809_c0_seq1	2	0.000335473	0.974607	0.000654584	0.000375871	0.0240275
comp2204078_c0_seq2	2	0.00854156	0.515291	0.011857	0.00811245	0.456198
comp2204144_c0_seq1	2	0.0107318	0.770735	0.0203226	0.0111826	0.187028
comp2204288_c0_seq1	2	0.00296376	0.601297	0.00423411	0.00284934	0.388656
comp2204337_c0_seq1	2	0.00800854	0.903968	0.0173758	0.00755168	0.063096
comp2204348_c0_seq1	5	0.0316191	0.0781865	0.0237014	0.0342276	0.832265
comp2204442_c0_seq1	3	0.23797	0.119293	0.488401	0.110379	0.0439566
comp2204490_c0_seq1	2	0.00236843	0.576472	0.00320199	0.00221632	0.415742
comp2204510_c0_seq1	2	0.00528235	0.872959	0.0103978	0.00535146	0.106009
comp2204566_c0_seq1	1	0.982058	5.80392e-05	0.00862387	0.00920637	5.3884e-05
comp2204672_c0_seq1	5	0.000681768	0.0249007	0.000814144	0.000795018	0.972808
comp2204897_c0_seq1	2	0.000197128	0.975888	0.000319324	0.000179606	0.0234157
comp2204930_c0_seq2	2	0.00125609	0.920776	0.0021402	0.00127415	0.0745538
comp2204995_c0_seq1	4	0.0827229	0.000173892	0.247371	0.669593	0.000138761
comp2205034_c0_seq1	5	0.00068987	0.0110363	0.000650533	0.000670502	0.986953
comp2205109_c0_seq1	5	0.0086211	0.0602807	0.00833644	0.0103571	0.912405
comp2205122_c0_seq1	4	0.00384715	8.82995e-06	0.00199551	0.99414	8.61494e-06
comp2205171_c0_seq1	2	0.00136313	0.877157	0.0019712	0.00119632	0.118313
gnl_Pdu_trscr_assembly_1_2052	1	0.844014	0.000160273	0.0590827	0.0966024	0.000140393
comp2205302_c0_seq1	4	0.00126764	1.57426e-06	0.000798395	0.997931	1.41855e-06
comp2205419_c0_seq2	1	0.935795	0.000622831	0.0386793	0.0243497	0.000553481
comp2205489_c0_seq1	5	0.00306235	0.286926	0.00410626	0.0031443	0.702761
comp2205583_c0_seq1	2	0.0150817	0.814678	0.0306897	0.0146811	0.12487
comp2205644_c0_seq1	1	0.566641	0.000275715	0.103578	0.329261	0.000244104
comp2205761_c0_seq1	2	6.1405e-05	0.996837	0.000112762	5.8599e-05	0.0029301
comp2205930_c0_seq2	2	0.00126319	0.896546	0.00202942	0.00124369	0.0989181
comp2206043_c0_seq1	5	0.00478931	0.0316977	0.0039898	0.00476321	0.95476
comp2206056_c0_seq1	5	0.00446246	0.100516	0.00548443	0.00544284	0.884094
comp2206082_c0_seq1	1	0.995277	9.88973e-06	0.00227313	0.00243167	8.64759e-06
comp2206215_c0_seq2	2	0.00428955	0.926036	0.00910987	0.00416609	0.0563987
gnl_Pdu_trscr_assembly_1_16880	4	0.0307243	3.68467e-05	0.0304536	0.938754	3.10771e-05
gnl_Pdu_trscr_assembly_1_94986	1	0.469769	0.00157386	0.406129	0.121431	0.00109699
comp2206651_c1_seq1	5	0.00250021	0.186294	0.0031188	0.00242526	0.805662
comp2206658_c0_seq1	4	0.000736816	2.25603e-06	0.000824523	0.998434	2.0584e-06
comp2206709_c0_seq1	5	0.000533094	0.0203926	0.000558723	0.000510404	0.978005
comp2206722_c0_seq1	2	0.0176458	0.553405	0.0256818	0.0193112	0.383956
comp2206764_c0_seq1	4	0.00305118	1.5716e-05	0.00363499	0.993284	1.46005e-05
comp2206896_c0_seq1	4	0.0158328	9.30718e-06	0.0044578	0.979692	8.50406e-06
comp2206928_c0_seq1	4	0.0242038	0.000371369	0.216906	0.758242	0.000275951
comp2207063_c0_seq1	5	0.000403352	0.018727	0.000474878	0.000454452	0.97994
comp2207078_c0_seq1	5	0.00218895	0.0706912	0.00236069	0.00204367	0.922715
comp2207142_c0_seq1	5	0.00177376	0.0389143	0.00172457	0.0015941	0.955993
comp2207229_c0_seq1	2	0.00644784	0.760108	0.0094259	0.0059652	0.218053
comp2207383_c0_seq1	1	0.956568	0.000393037	0.0236507	0.0190208	0.000367673
comp2207445_c0_seq1	2	0.000117938	0.992071	0.00020442	0.000112807	0.00749417
comp2207487_c0_seq1	2	0.000547498	0.637657	0.000849414	0.000595529	0.360351
comp2207522_c0_seq2	5	0.0043105	0.0316306	0.00357666	0.00408257	0.9564
comp2207642_c0_seq1	2	0.00229416	0.927523	0.00441783	0.00229621	0.0634684
comp2207651_c1_seq2	2	0.00140757	0.928946	0.0024097	0.00128409	0.065953
comp2207766_c0_seq1	4	0.114731	0.00455008	0.0868228	0.787942	0.0059536
comp2207785_c0_seq1	2	0.000946327	0.983983	0.00209075	0.000898528	0.0120809
comp2207922_c0_seq1	1	0.997459	6.70916e-06	0.000950088	0.00157778	6.43077e-06
comp2208148_c0_seq1	4	0.025085	0.000622383	0.0619181	0.911804	0.000570889
comp2208320_c0_seq1	2	0.000129551	0.993556	0.000234553	0.000121815	0.0059577
comp2208456_c0_seq1	2	0.00143634	0.931207	0.00255325	0.00141642	0.0633866
comp2208457_c0_seq1	5	0.0018527	0.0530043	0.00184421	0.00155863	0.94174
comp2208522_c0_seq1	1	0.754065	0.000131079	0.0161435	0.229518	0.000142885
comp2208590_c0_seq1	5	0.000607071	0.0122248	0.000596425	0.000605707	0.985966
gnl_Pdu_trscr_assembly_1_92359	2	5.89752e-05	0.997389	0.000108787	5.4239e-05	0.00238903
comp2208704_c0_seq1	2	0.000681447	0.658633	0.00100985	0.000669383	0.339006
comp2208706_c0_seq1	5	0.000135667	0.00495418	0.000144229	0.000132946	0.994633
comp2208707_c0_seq1	5	8.17071e-05	0.0129325	9.94868e-05	7.92299e-05	0.986807
comp2208715_c0_seq1	5	0.00098991	0.464169	0.00148761	0.00107434	0.532279
comp2208773_c0_seq1	1	0.889861	0.00238988	0.0528251	0.0523517	0.00257231
comp2208901_c0_seq1	2	0.00267364	0.9519	0.00489731	0.00226709	0.0382619
comp2208935_c0_seq2	4	0.146442	0.000290671	0.31636	0.536681	0.000226034
comp2208952_c0_seq1	5	4.41029e-05	0.0017924	4.58467e-05	4.22015e-05	0.998075
comp2208996_c0_seq1	5	0.000485679	0.021813	0.000580874	0.000548271	0.976572
comp2209056_c0_seq1	4	0.00221691	1.259e-05	0.0032493	0.99451	1.15164e-05
comp2209302_c0_seq2	2	0.000304051	0.881792	0.00044187	0.00028279	0.11718
comp2209411_c0_seq2	2	0.00479023	0.950136	0.0124923	0.00454058	0.0280414
comp2209412_c0_seq1	5	0.00360349	0.419745	0.00476369	0.00341241	0.568475
comp2209469_c0_seq1	2	0.00152701	0.948452	0.00296278	0.00154275	0.0455157
comp2209542_c0_seq2	1	0.609225	5.23471e-05	0.0269866	0.363689	4.74951e-05
comp2209791_c0_seq1	1	0.91558	0.00139986	0.0402169	0.041336	0.00146715
comp2209889_c0_seq4	4	0.0128901	0.000130036	0.0324064	0.954461	0.000112254
comp2209959_c0_seq1	5	0.00330464	0.157708	0.00414755	0.00346747	0.831372
comp2210130_c0_seq1	1	0.986495	5.28094e-05	0.00423532	0.00916106	5.59128e-05
gnl_Pdu_trscr_assembly_1_90729	5	0.00461745	0.0499943	0.00403741	0.00423651	0.937114
comp2210246_c0_seq1	2	0.00280338	0.778499	0.00401765	0.00260613	0.212074
comp2210374_c0_seq1	2	0.00765487	0.604942	0.0111446	0.00775055	0.368508
comp2210376_c0_seq1	1	0.964452	0.000201122	0.0105625	0.0245564	0.000228386
comp2210398_c0_seq1	4	0.21651	3.96908e-05	0.0194364	0.763978	3.63376e-05
comp2210440_c0_seq1_contamination	4	0.194054	0.0260333	0.154007	0.584603	0.0413018
comp2210547_c1_seq1	5	0.0304355	0.312519	0.0341138	0.0278014	0.59513
gnl_Pdu_trscr_assembly_1_1598	3	0.0287882	5.14129e-05	0.921307	0.0498177	3.52898e-05
comp2210888_c0_seq1	4	0.0468449	0.000187903	0.018225	0.934543	0.000199043
comp2210994_c2_seq1	2	0.00121087	0.929711	0.00198786	0.00116492	0.0659254
comp2211011_c0_seq1	3	0.143403	0.0784394	0.595876	0.151971	0.0303114
comp2211270_c0_seq1	5	0.00349903	0.493502	0.00480623	0.0034202	0.494773
comp2211421_c0_seq1	4	0.00214029	8.58291e-06	0.0018118	0.996031	8.30074e-06
comp2211652_c0_seq1	4	0.0524156	0.00330118	0.133965	0.807244	0.0030745
comp2211765_c0_seq1	5	0.000809964	0.0530545	0.000970429	0.000816691	0.944348
comp2211803_c0_seq1	2	0.000233896	0.988784	0.000446492	0.000242631	0.010293
comp2211906_c0_seq1	5	0.00345703	0.0309417	0.00293811	0.00319888	0.959464
comp2212006_c0_seq1	1	0.989818	4.04585e-05	0.00529883	0.00480605	3.67358e-05
comp2212134_c0_seq1	5	0.0106397	0.0536627	0.00851117	0.0105602	0.916626
comp2212156_c1_seq1	5	0.0015329	0.0481115	0.00172361	0.0015696	0.947062
comp2212186_c0_seq1	1	0.822274	0.00641993	0.0796365	0.0841263	0.00754296
comp2212419_c0_seq1	2	0.00285106	0.849153	0.00494346	0.00291886	0.140133
comp2212642_c0_seq1	2	0.000875898	0.849581	0.00135715	0.000880428	0.147306
comp2212838_c1_seq1	5	0.00196553	0.0766929	0.00225861	0.00195748	0.917126
comp2212973_c0_seq1	5	0.00387618	0.106033	0.00450636	0.00416568	0.881418
comp2213012_c1_seq1	4	0.00069614	1.92686e-06	0.000663435	0.998637	1.76487e-06
comp2213433_c0_seq1	5	0.00337328	0.350479	0.0049047	0.0035821	0.637661
comp2213506_c0_seq1	5	5.39074e-05	0.00359845	5.94024e-05	5.081e-05	0.996237
comp2213512_c0_seq1	3	0.00438775	5.32102e-05	0.985086	0.010443	3.04998e-05
comp2213838_c1_seq1	1	0.964753	0.000282427	0.0175454	0.0171476	0.00027171
comp2213991_c0_seq1	2	0.000940789	0.938003	0.00155876	0.000880799	0.0586168
comp2214009_c0_seq1	5	0.0094771	0.050899	0.00753825	0.00891483	0.923171
comp2214119_c0_seq1	5	0.000516381	0.38234	0.000769051	0.00055736	0.615817
comp2214176_c0_seq1	5	0.00130917	0.188604	0.00170579	0.00128558	0.807096
gnl_Pdu_trscr_assembly_1_19906	4	0.206336	0.000434537	0.0253013	0.767386	0.000541314
comp2214237_c0_seq1	2	0.000691146	0.985783	0.00155348	0.000693778	0.0112789
comp2214238_c0_seq1	2	0.0015503	0.818357	0.00223242	0.00136181	0.176498
gnl_Pdu_trscr_assembly_1_202922	5	0.0212887	0.349484	0.0239952	0.017917	0.587315
comp2214330_c0_seq1	3	0.27438	0.0058723	0.62601	0.0902536	0.00348442
comp2214452_c0_seq1	1	0.810834	0.000701752	0.0265929	0.160958	0.000913068
comp2214496_c0_seq1	2	0.00461689	0.783643	0.00721276	0.00448699	0.20004
comp2214509_c0_seq1	4	0.11125	8.07216e-05	0.0249317	0.86366	7.78156e-05
comp2214511_c0_seq1	5	0.000478859	0.0210424	0.000505515	0.0004397	0.977534
comp2214646_c0_seq1	2	0.00126062	0.807407	0.0021174	0.00140691	0.187808
gnl_Pdu_trscr_assembly_1_200922	4	0.011762	8.08588e-05	0.0076523	0.980417	8.75645e-05
comp2214874_c0_seq1	1	0.993975	1.74899e-05	0.00280773	0.00318389	1.58627e-05
comp2214888_c0_seq1	2	0.000539547	0.978109	0.00116245	0.000632283	0.0195569
comp2214900_c0_seq1	5	0.00429669	0.0740299	0.00443184	0.00422142	0.91302
comp2215197_c0_seq1	5	0.0119697	0.32685	0.013935	0.0106006	0.636644
gnl_Pdu_trscr_assembly_1_15988	1	0.996217	4.65297e-06	0.00142295	0.00235106	4.15556e-06
comp2215664_c0_seq1	4	0.415143	5.37572e-05	0.0270826	0.557671	4.9034e-05
comp2215664_c1_seq1	1	0.959567	4.53935e-05	0.00637992	0.0339605	4.714e-05
comp2215885_c0_seq1	1	0.999298	1.33034e-06	0.000278929	0.000420341	1.21905e-06
comp2216126_c0_seq1	2	0.000557073	0.626131	0.000811236	0.000558531	0.371942
comp2216167_c0_seq4	4	0.126398	8.99812e-05	0.269396	0.604046	6.97501e-05
comp2216604_c0_seq2	4	0.247581	0.0848325	0.146019	0.309711	0.211856
comp2216701_c0_seq3	4	0.026061	3.77164e-05	0.00860754	0.965257	3.66259e-05
comp2216809_c0_seq2	5	5.71968e-05	0.00953631	6.85685e-05	5.50961e-05	0.990283
comp2216816_c0_seq1	3	0.097364	0.000287932	0.658575	0.243568	0.00020509
comp2216905_c0_seq1	5	0.000745438	0.0301857	0.00086741	0.000792208	0.967409
comp2217068_c0_seq1	3	0.037059	0.00510578	0.902546	0.0533286	0.00196103
comp2217261_c0_seq1	3	0.09216	0.000341602	0.832448	0.0748198	0.000230691
comp2217273_c0_seq1	2	0.000806479	0.589724	0.00127975	0.000901714	0.407288
comp2217426_c0_seq1	1	0.857185	0.00270719	0.0602538	0.0768434	0.00301105
gnl_Pdu_trscr_assembly_1_10798	4	0.028034	0.00019426	0.478715	0.492919	0.000137217
comp2217620_c0_seq2	4	0.0406872	0.00180194	0.121587	0.834324	0.00159999
comp2217628_c0_seq3	5	0.00643805	0.435758	0.00886368	0.00668525	0.542255
comp2217632_c0_seq1	5	0.00103808	0.180014	0.00141176	0.0010509	0.816485
comp2217785_c0_seq3	2	0.000692592	0.978497	0.00133722	0.000687045	0.0187862
comp2217812_c0_seq1	2	0.0221143	0.796518	0.0537129	0.0223883	0.105267
gnl_Pdu_trscr_assembly_1_14998	2	0.000171754	0.986003	0.000281531	0.000158128	0.0133857
comp2217905_c0_seq1	5	0.00111614	0.0246155	0.0012322	0.00126996	0.971766
comp2218022_c0_seq1	5	0.000369277	0.0128116	0.000403797	0.00039286	0.986022
comp2218087_c0_seq1	4	0.211445	0.0251428	0.137063	0.578204	0.0481452
comp2218105_c0_seq4	2	0.000259326	0.965975	0.000417481	0.000244076	0.0331045
comp2218374_c0_seq1	5	0.0116927	0.259032	0.0123873	0.010105	0.706783
comp2218413_c0_seq1	2	0.000714302	0.971172	0.00128329	0.000677533	0.0261533
comp2218579_c0_seq1	4	0.00224669	1.18104e-05	0.00330717	0.994424	1.07377e-05
comp2218605_c0_seq1	4	0.187857	0.000347297	0.308087	0.503441	0.000267337
comp2218632_c0_seq2	5	0.0449666	0.121438	0.0335724	0.0440353	0.755987
comp2218834_c0_seq1	5	0.000712914	0.0419214	0.00080182	0.000663077	0.955901
comp2218843_c1_seq1	5	0.000950179	0.0705002	0.00115672	0.000943823	0.926449
comp2219075_c0_seq3	2	0.000144456	0.99539	0.000310285	0.000150178	0.00400516
comp2219092_c0_seq1	1	0.895329	0.00209682	0.044073	0.0560564	0.00244522
comp2219123_c0_seq1	2	0.0960584	0.444088	0.291345	0.081295	0.0872131
comp2219213_c0_seq1	5	0.0399739	0.165593	0.0354239	0.0392444	0.719765
comp2219247_c0_seq1	1	0.999561	5.93882e-07	0.000153924	0.00028416	5.42775e-07
comp2219624_c0_seq2	4	0.00343769	4.30997e-06	0.00196424	0.99459	3.90406e-06
comp2219666_c0_seq1	5	0.0544958	0.250788	0.0563328	0.0578683	0.580515
comp2219685_c0_seq1	2	8.85789e-05	0.992876	0.000149821	8.32545e-05	0.00680269
comp2219762_c0_seq1	5	0.000341763	0.0232163	0.000397213	0.000334433	0.97571
comp2219827_c0_seq2	1	0.994234	5.11374e-06	0.0013977	0.00435818	4.75814e-06
comp2219955_c0_seq1	2	0.00751502	0.793516	0.0139047	0.00816461	0.1769
comp2219958_c1_seq1	5	0.0191411	0.321095	0.0227522	0.0188768	0.618135
comp2219984_c0_seq1	4	0.0132827	0.000109005	0.0195282	0.96698	9.97313e-05
comp2219987_c0_seq3	5	0.0516742	0.218737	0.0465714	0.0490585	0.633959
comp2220018_c0_seq1	2	0.0149854	0.804711	0.0345983	0.0167108	0.128995
comp2220020_c1_seq1	4	0.0188288	0.000235624	0.0195865	0.961101	0.000247936
comp2220033_c1_seq1	2	0.00094479	0.932706	0.0016619	0.000936138	0.0637507
comp2220039_c0_seq1	4	0.0262161	0.000483086	0.13046	0.842455	0.00038556
comp2220070_c0_seq2	1	0.969147	0.000249444	0.0153918	0.0149715	0.000240572
comp2220078_c0_seq1	2	0.000808533	0.890178	0.00124825	0.000794446	0.10697
comp2220138_c0_seq1	5	0.000491649	0.0969065	0.000637634	0.000476244	0.901488
comp2220201_c0_seq1	1	0.744663	0.00195069	0.0945553	0.156768	0.00206261
comp2220297_c0_seq2	2	0.000490151	0.641631	0.000696269	0.000461648	0.356721
gnl_Pdu_trscr_assembly_1_2470	4	0.01017	0.000106095	0.0254802	0.96415	9.35822e-05
comp2220360_c0_seq1	2	0.00340861	0.561507	0.0050192	0.00347936	0.426586
comp2220373_c0_seq1	2	0.00444831	0.78048	0.006778	0.00424727	0.204047
comp2220394_c0_seq1	5	0.000360343	0.0139775	0.000402292	0.000366626	0.984893
comp2220399_c0_seq1	4	0.221605	0.000225917	0.311248	0.466743	0.000178494
comp2220443_c0_seq2	5	0.0800224	0.217029	0.0732665	0.081007	0.548675
comp2220452_c1_seq1	2	0.000123992	0.993472	0.00023611	0.00012222	0.00604531
comp2220455_c0_seq1	5	0.0378097	0.128445	0.0311742	0.03879	0.763781
comp2220459_c0_seq1	2	0.00177123	0.842974	0.00259687	0.00164318	0.151014
comp2220490_c0_seq1	5	0.000233305	0.00756501	0.000245847	0.000230796	0.991725
comp2220544_c0_seq1	1	0.997673	3.02786e-06	0.000632509	0.00168859	2.87393e-06
comp2220563_c0_seq2	4	0.0338061	0.000978284	0.0661126	0.898167	0.000936153
comp2220677_c0_seq1	4	0.062175	5.18766e-05	0.0721354	0.865595	4.26719e-05
comp2220691_c0_seq1	5	0.00155752	0.152118	0.00201547	0.00159746	0.842712
comp2220727_c0_seq1	5	0.0319919	0.119063	0.0251573	0.029988	0.7938
comp2220733_c0_seq1	2	0.118071	0.283359	0.166719	0.150755	0.281096
comp2220774_c0_seq1	5	0.0931954	0.150614	0.0668368	0.0906538	0.5987
gnl_Pdu_trscr_assembly_1_201601	2	0.00158704	0.971404	0.0036293	0.00167735	0.0217019
comp2220966_c1_seq1	2	0.000755424	0.976058	0.00141113	0.000714054	0.0210609
comp2221025_c0_seq1	2	0.00061208	0.976184	0.00115046	0.000588219	0.0214653
comp2221045_c0_seq2	2	0.00179361	0.969769	0.00378572	0.00169192	0.0229598
comp2221070_c0_seq3	2	0.000298774	0.939817	0.000515312	0.000321789	0.0590467
gnl_Pdu_trscr_assembly_1_274638	5	0.000901598	0.174832	0.00114165	0.000834152	0.82229
comp2221095_c0_seq1	2	0.000400868	0.990829	0.000879103	0.000402172	0.00748921
comp2221142_c0_seq1	2	0.000599406	0.98525	0.00127739	0.000598306	0.0122753
comp2221179_c0_seq1	1	0.840453	0.000133219	0.0126242	0.14664	0.000149827
comp2221211_c0_seq1	5	0.000314391	0.0255876	0.00034896	0.000281264	0.973468
comp2221231_c0_seq2	4	0.358721	0.000959583	0.0414994	0.597554	0.00126603
comp2221273_c0_seq1	4	0.190318	6.81405e-05	0.0121608	0.797383	7.07e-05
comp2221300_c0_seq1	4	0.000680671	1.44793e-06	0.000638012	0.998679	1.30239e-06
comp2221399_c0_seq1	2	0.00214725	0.783357	0.00313265	0.00191384	0.209449
comp2221435_c0_seq3	2	0.000343353	0.984951	0.000618451	0.000325874	0.0137616
comp2221474_c0_seq1	1	0.7621	0.000441461	0.0251894	0.211733	0.000536454
comp2221486_c0_seq1	1	0.7224	0.000158345	0.0324746	0.244812	0.000154948
comp2221537_c0_seq1	5	0.0217839	0.120579	0.0198548	0.0212861	0.816496
comp2221583_c0_seq2	1	0.469527	0.0029571	0.463925	0.0617935	0.00179748
comp2221604_c0_seq1	1	0.509418	0.000458119	0.0268716	0.462684	0.000568612
comp2221605_c0_seq1	5	0.000351708	0.0153943	0.000366968	0.000320163	0.983567
comp2221608_c0_seq2	5	0.0121222	0.0949176	0.0110245	0.0117172	0.870219
comp2221672_c0_seq1	5	0.00178678	0.48423	0.00251088	0.00179388	0.509679
comp2221749_c0_seq2	3	0.173878	0.0544076	0.605205	0.143262	0.0232471
comp2221813_c0_seq2	2	0.00221798	0.844538	0.00334415	0.00201524	0.147885
comp2221854_c0_seq1	5	0.000590623	0.139213	0.000754313	0.000566046	0.858876
comp2221859_c0_seq1	1	0.951479	0.000443696	0.0275116	0.0201598	0.00040558
comp2221867_c0_seq1	5	0.000546961	0.038216	0.000614951	0.000523804	0.960098
comp2221987_c0_seq1	1	0.888254	0.00217207	0.0616912	0.0457877	0.00209465
comp2222035_c0_seq2	5	0.00333316	0.035518	0.00305276	0.00324148	0.954855
gnl_Pdu_trscr_assembly_1_339128	2	0.00118018	0.969216	0.00240049	0.00115506	0.0260483
comp2222124_c0_seq1	5	0.00104916	0.0299349	0.00116264	0.00112201	0.966731
comp2222175_c0_seq1	1	0.968262	9.59037e-05	0.0176363	0.0139247	8.09972e-05
comp2222258_c0_seq1	4	0.00622883	5.85876e-06	0.00365391	0.990106	5.20633e-06
comp2222284_c0_seq1	2	0.000401694	0.961455	0.000731321	0.000426066	0.0369855
comp2222329_c0_seq1	1	0.920779	0.000984512	0.0456334	0.031706	0.000896757
comp2222359_c0_seq1	5	0.000227639	0.0734093	0.000283946	0.000208884	0.92587
comp2222372_c0_seq1	5	0.00128973	0.0376578	0.00133585	0.00125991	0.958457
comp2222392_c0_seq1	1	0.975591	6.82645e-05	0.0066745	0.0175958	7.02713e-05
comp2222438_c0_seq1	5	0.000298723	0.0199153	0.00032721	0.000279221	0.97918
comp2222565_c0_seq2	1	0.574527	0.0184062	0.109701	0.264127	0.0332394
comp2222669_c0_seq2	1	0.77338	0.000961594	0.0354963	0.188962	0.00119974
comp2222774_c0_seq1	2	0.00254784	0.951968	0.00538494	0.00257307	0.0375264
comp2222851_c0_seq1	2	0.00109276	0.911486	0.00214853	0.00136531	0.0839078
gnl_Pdu_trscr_assembly_1_1214	5	0.0717662	0.148921	0.0616156	0.0896877	0.62801
gnl_Pdu_trscr_assembly_1_20088	5	0.000770624	0.269269	0.00110221	0.000805068	0.728053
comp2222975_c0_seq1	5	0.217259	0.10077	0.135147	0.267079	0.279745
comp2222988_c0_seq1	5	0.000259727	0.0208853	0.00033073	0.000295335	0.978229
comp2223036_c0_seq1	4	0.0856611	5.98137e-05	0.0207646	0.893459	5.57181e-05
comp2223102_c0_seq2	2	0.00501985	0.905977	0.0100437	0.00497503	0.0739843
comp2223254_c0_seq1	1	0.915416	0.00120725	0.0483157	0.0339359	0.00112559
comp2223390_c0_seq2	5	0.00281604	0.0943285	0.00322002	0.00273519	0.8969
comp2223422_c0_seq1	5	0.000277914	0.343937	0.000385825	0.000270031	0.655129
comp2223453_c0_seq1	2	0.0016967	0.888017	0.00308213	0.00199375	0.10521
comp2223496_c0_seq3	1	0.981968	6.93863e-05	0.00763243	0.0102634	6.67999e-05
gnl_Pdu_trscr_assembly_1_10879	4	0.377511	0.0020013	0.108699	0.50963	0.00215897
gnl_Pdu_trscr_assembly_1_88565	4	0.123111	0.000299684	0.28191	0.594449	0.000230343
comp2223620_c0_seq1	1	0.897447	4.34918e-05	0.0321546	0.0703183	3.66418e-05
comp2223643_c0_seq2	1	0.478119	0.00149011	0.0508751	0.467537	0.00197799
gnl_Pdu_trscr_assembly_1_11502	1	0.851069	0.00156888	0.0658259	0.0800116	0.0015245
comp2223788_c0_seq1	3	0.0402424	0.000580042	0.867666	0.0911538	0.000358018
comp2223797_c0_seq1	2	0.00377053	0.879744	0.00673712	0.00369344	0.106055
comp2223830_c0_seq1	4	0.114751	0.000707042	0.0297605	0.853874	0.000907825
gnl_Pdu_trscr_assembly_1_265542	1	0.810985	0.00014988	0.0410596	0.147669	0.000136059
comp2223856_c0_seq2	3	0.232245	0.103401	0.472227	0.140708	0.0514199
comp2223871_c0_seq1	5	0.00041941	0.0146429	0.000460196	0.000430318	0.984047
comp2223873_c0_seq1	2	0.000342552	0.985646	0.000658222	0.000337683	0.013016
comp2223888_c0_seq2	1	0.513089	0.0012781	0.0465356	0.437402	0.0016946
comp2223925_c0_seq1	2	0.0023228	0.928953	0.00522725	0.0028647	0.060632
comp2223962_c0_seq7	2	0.00052776	0.947865	0.000938151	0.000562961	0.0501064
comp2223990_c0_seq1	1	0.978683	0.000140661	0.00937494	0.0116609	0.000140547
comp2223996_c0_seq1	2	0.00506599	0.846831	0.00891204	0.00511276	0.134078
comp2224009_c0_seq1	5	0.0017634	0.200161	0.00209616	0.00161149	0.794368
comp2224014_c0_seq1	4	0.000631871	1.57602e-06	0.000384115	0.998981	1.52901e-06
comp2224040_c0_seq1	5	0.0033503	0.0587122	0.00381297	0.00401217	0.930112
comp2224089_c0_seq1	4	0.345308	4.47113e-05	0.0228057	0.631801	4.07943e-05
comp2224092_c0_seq1	1	0.995117	7.27334e-06	0.00146007	0.00340882	6.95423e-06
comp2224123_c0_seq1	5	0.00107542	0.0438754	0.00114117	0.000977727	0.95293
comp2224231_c0_seq1	5	0.00492589	0.0558163	0.00460828	0.00460876	0.930041
comp2224269_c0_seq1	1	0.656205	0.00030547	0.18166	0.16158	0.000249755
comp2224273_c0_seq2	2	0.00258976	0.730187	0.00374204	0.0023359	0.261145
comp2224302_c0_seq1	5	0.000371316	0.0159851	0.000413167	0.00036717	0.982863
comp2224402_c0_seq2	1	0.847869	0.000689422	0.115643	0.0352848	0.000514069
comp2224411_c0_seq1	4	0.202055	0.000717092	0.0318954	0.764404	0.000928538
comp2224442_c0_seq1	1	0.996579	8.4986e-06	0.00106252	0.00234121	8.36762e-06
comp2224448_c0_seq1	5	0.000878877	0.0383931	0.00108124	0.000995144	0.958652
comp2224449_c0_seq1	1	0.999655	3.95244e-07	9.76588e-05	0.000246623	3.69207e-07
comp2224584_c0_seq2	5	0.00324105	0.0437436	0.00307215	0.00324838	0.946695
comp2224705_c0_seq1	4	0.0297456	4.84661e-05	0.0076227	0.962533	5.04891e-05
comp2224708_c0_seq1	4	0.102863	7.96499e-05	0.0254302	0.871553	7.49244e-05
comp2224718_c0_seq1	4	0.04891	0.0021142	0.0769238	0.869815	0.00223733
comp2224744_c0_seq1	1	0.665567	7.52674e-05	0.0316452	0.302644	6.93199e-05
comp2224757_c0_seq1	5	0.000630254	0.0179614	0.000668049	0.000640596	0.9801
comp2224767_c0_seq1	1	0.445166	0.00200983	0.198724	0.352205	0.00189621
comp2224794_c0_seq1	1	0.861844	4.43308e-05	0.0350311	0.103043	3.7474e-05
comp2224827_c0_seq1	2	0.00656754	0.70441	0.0112474	0.0073762	0.270398
comp2224883_c0_seq1	1	0.994296	3.7994e-06	0.00118593	0.00451038	3.51508e-06
comp2224925_c0_seq2	1	0.800908	0.00373401	0.135704	0.0566519	0.00300198
comp2224932_c0_seq1	1	0.871763	4.70972e-05	0.0120383	0.116106	4.60298e-05
comp2224946_c0_seq1	4	0.00651751	2.61267e-05	0.00661668	0.986816	2.40943e-05
comp2225054_c0_seq1	4	0.0247973	0.000166595	0.10984	0.865067	0.000129213
comp2225056_c0_seq1	1	0.792871	9.15163e-05	0.0256682	0.181283	8.56188e-05
comp2225064_c0_seq1	4	0.419446	5.4598e-05	0.0439968	0.536456	4.74038e-05
gnl_Pdu_trscr_assembly_1_8306	5	0.000136419	0.00566517	0.000153446	0.000148363	0.993897
comp2225089_c0_seq1	4	0.0128548	0.000136818	0.0443294	0.942564	0.000115076
comp2225266_c0_seq1	5	0.0124305	0.052811	0.00951769	0.0121301	0.913111
gnl_Pdu_trscr_assembly_1_15180	4	0.108418	8.93753e-05	0.0337011	0.85771	8.15944e-05
comp2225417_c0_seq1	4	0.054884	5.75358e-05	0.0351401	0.909868	5.03596e-05
comp2225511_c0_seq1	1	0.6064	0.000833665	0.112147	0.27981	0.00080994
comp2225541_c0_seq2	5	0.00313724	0.0504412	0.00344469	0.00373149	0.939245
gnl_Pdu_trscr_assembly_1_16325	4	0.0166	0.000313667	0.0482218	0.934589	0.000275399
comp2225573_c0_seq1	2	0.00024248	0.989873	0.0004476	0.000232819	0.00920417
comp2225624_c0_seq1	4	0.117738	0.000459311	0.386126	0.495331	0.000346942
comp2225625_c0_seq1	1	0.999364	1.17456e-06	0.00023612	0.000397163	1.09005e-06
comp2225664_c0_seq1	2	0.000300054	0.989306	0.00058727	0.000301992	0.00950463
comp2225718_c0_seq1	5	0.00170975	0.241331	0.00219321	0.00169377	0.753072
comp2225758_c0_seq4	5	0.000196246	0.0206701	0.000244248	0.000205919	0.978684
comp2225761_c0_seq1	1	0.846952	0.00151287	0.0424922	0.10712	0.00192359
comp2225804_c0_seq1	5	0.000790964	0.136599	0.00098944	0.000767493	0.860853
comp2225875_c0_seq1	4	0.0111436	0.000103215	0.0177832	0.970874	9.60097e-05
comp2225897_c0_seq1	5	7.80331e-05	0.0135568	0.000101264	8.26606e-05	0.986181
comp2225941_c0_seq1	2	0.00429544	0.894283	0.0069907	0.00369747	0.0907336
comp2225956_c0_seq1	4	0.00205395	3.76185e-06	0.00164887	0.99629	3.37608e-06
comp2226005_c0_seq5	4	0.0239557	0.000235727	0.081444	0.894165	0.000199127
comp2226014_c0_seq1	2	0.000194258	0.984009	0.000362537	0.000205721	0.0152284
comp2226033_c0_seq1	4	0.375594	4.72015e-05	0.0155589	0.608754	4.54785e-05
comp2226073_c0_seq2	1	0.967694	0.000150884	0.0203722	0.0116544	0.000128154
gnl_Pdu_trscr_assembly_1_7113	1	0.588052	0.00160606	0.0502375	0.357905	0.00219877
comp2226146_c0_seq1	4	0.290888	0.000158295	0.0235047	0.685286	0.000163709
comp2226152_c0_seq1	2	0.00481471	0.900387	0.00995707	0.00499451	0.0798465
comp2226190_c0_seq1	4	0.102257	9.47858e-05	0.0733557	0.824211	8.1673e-05
comp2226296_c1_seq1	1	0.811685	0.00196962	0.134076	0.0507177	0.00155119
comp2226307_c0_seq1	5	0.000817855	0.174064	0.00111166	0.00085518	0.823152
comp2226309_c1_seq1	5	0.0200013	0.312395	0.0288268	0.0243587	0.614418
comp2226460_c0_seq1	3	0.127066	0.183497	0.351233	0.223519	0.114685
comp2226485_c0_seq1	2	0.0494712	0.623332	0.104262	0.0516758	0.17126
comp2226542_c0_seq1	4	0.204572	0.000173993	0.265136	0.529978	0.000139429
comp2226616_c0_seq1	2	0.000330881	0.925201	0.000488988	0.000298782	0.0736799
comp2226655_c0_seq1	5	0.000793622	0.0457273	0.000895084	0.000750419	0.951834
comp2226697_c0_seq1	3	0.177599	0.0569613	0.595918	0.14263	0.0268926
comp2226744_c0_seq1	1	0.983234	9.7249e-05	0.00821084	0.00836579	9.21474e-05
comp2226843_c0_seq1	5	0.00138721	0.238792	0.00172212	0.00123021	0.756869
comp2226860_c0_seq1	2	0.033257	0.738416	0.0635585	0.0281274	0.136641
comp2226921_c0_seq1	2	0.0023246	0.958758	0.00512953	0.0024454	0.0313427
comp2227106_c0_seq2	1	0.973815	0.000118577	0.0145336	0.0114286	0.00010377
comp2227117_c0_seq2	5	8.85302e-05	0.017668	0.000114026	9.03749e-05	0.982039
comp2227194_c1_seq1	2	0.000772559	0.936388	0.00129517	0.00076434	0.0607796
comp2227317_c0_seq2	2	0.000232534	0.989747	0.000402233	0.000207661	0.00941079
comp2227318_c0_seq2	3	0.0261788	0.000196002	0.662267	0.311224	0.000134522
comp2227525_c0_seq3	1	0.998131	2.92586e-06	0.000794576	0.00106901	2.58615e-06
comp2227687_c0_seq1	4	0.267093	0.000908124	0.0359516	0.694844	0.00120304
comp2227947_c0_seq3	4	0.242987	0.0278507	0.17635	0.508607	0.0442049
gnl_Pdu_trscr_assembly_1_91632	4	0.013417	5.85009e-05	0.0535108	0.932967	4.71172e-05
comp2228128_c0_seq1	5	0.0139185	0.21066	0.0144801	0.0128361	0.748105
comp2228189_c0_seq2	2	0.0116582	0.883086	0.0256224	0.0105119	0.0691219
comp2228206_c0_seq1	2	0.000338891	0.974281	0.000602234	0.000358726	0.024419
comp2228213_c0_seq2	1	0.869182	0.000731179	0.0807835	0.0487009	0.00060219
comp2228240_c0_seq1	2	0.00889141	0.870464	0.0174704	0.00810141	0.0950724
comp2228256_c0_seq1	5	0.007302	0.27632	0.0102292	0.00903324	0.697115
comp2228339_c0_seq1	3	0.0545935	0.00658961	0.835002	0.10072	0.00309456
comp2228369_c0_seq1	5	0.000305261	0.0103056	0.000345482	0.000337548	0.988706
comp2228396_c0_seq1	4	0.00899642	8.9582e-05	0.0125228	0.978306	8.56811e-05
comp2228411_c0_seq1	1	0.94179	0.000271635	0.0242014	0.0334767	0.000260144
comp2228469_c0_seq1	3	0.0850917	0.00718295	0.667297	0.236207	0.00422136
comp2228494_c2_seq1	1	0.75886	0.00568826	0.162402	0.0685039	0.00454577
comp2228534_c0_seq1	4	0.0459009	2.91452e-05	0.00769312	0.946348	2.89588e-05
comp2228660_c0_seq1	4	0.0243985	0.00027678	0.017844	0.95717	0.00031081
comp2228719_c0_seq1	1	0.988031	3.20138e-05	0.00672777	0.0051811	2.77857e-05
comp2228733_c0_seq1	2	0.000999574	0.838935	0.0015743	0.000975523	0.157516
comp2228905_c0_seq1	2	0.00229233	0.828697	0.0036044	0.00225463	0.163151
comp2228913_c0_seq2	5	0.00141006	0.107686	0.00161662	0.00132881	0.887958
comp2228962_c0_seq1	5	0.140854	0.123518	0.0850056	0.124774	0.525848
comp2228974_c3_seq2	1	0.927357	0.000951049	0.0376969	0.0330656	0.000929703
comp2228984_c0_seq1	2	0.000328709	0.99162	0.000702467	0.000332003	0.00701713
gnl_Pdu_trscr_assembly_1_2304	5	0.00101966	0.0454242	0.00110725	0.000945828	0.951503
comp2229047_c0_seq1	2	0.000659126	0.962553	0.00108337	0.000604972	0.0350999
comp2229048_c0_seq1	1	0.599635	0.000126304	0.0236895	0.376422	0.000126899
comp2229085_c0_seq1	2	0.00287163	0.904322	0.00548874	0.00290691	0.0844112
comp2229175_c0_seq1	5	0.00306533	0.125154	0.00359861	0.00293626	0.865246
comp2229224_c0_seq1	5	0.212582	0.163425	0.157107	0.180155	0.286731
comp2229342_c0_seq1	4	0.0121445	0.000155172	0.0251522	0.962407	0.000140749
comp2229424_c0_seq3	2	0.00804732	0.852432	0.0180905	0.00952244	0.111908
comp2229441_c0_seq1	2	0.00989395	0.752053	0.0157847	0.0097997	0.212469
comp2229511_c0_seq2	5	0.00759169	0.0506357	0.00671859	0.00808058	0.926973
comp2229573_c0_seq1	5	0.00275785	0.131616	0.00323861	0.00274783	0.859639
comp2229575_c0_seq1	5	4.47502e-05	0.00499408	5.46085e-05	4.59069e-05	0.994861
comp2229590_c0_seq1	1	0.986047	2.42993e-05	0.00411437	0.00979085	2.32854e-05
comp2229633_c0_seq1	2	0.000759198	0.807221	0.00111712	0.000718776	0.190184
comp2229738_c0_seq1	4	0.29263	0.0644563	0.135431	0.31313	0.194353
comp2229746_c0_seq2	5	0.000346357	0.0414704	0.000454835	0.000379441	0.957349
gnl_Pdu_trscr_assembly_1_201032	5	0.00014156	0.00548058	0.000145545	0.000132266	0.9941
comp2229846_c0_seq1	1	0.996789	3.30302e-06	0.00141996	0.00178484	2.83629e-06
comp2230260_c0_seq1	2	0.000171582	0.979277	0.000304478	0.000179257	0.0200675
comp2230347_c0_seq1	5	0.000502723	0.141418	0.000715306	0.000573567	0.85679
comp2230408_c0_seq1	4	0.12907	8.93272e-05	0.0290504	0.841707	8.33897e-05
comp2230408_c1_seq1	4	0.0649021	8.45537e-05	0.0400794	0.89486	7.37664e-05
comp2230437_c0_seq1	5	0.00706154	0.132168	0.00837209	0.00782773	0.844571
comp2230509_c0_seq2	1	0.987354	6.15618e-05	0.00525034	0.00727279	6.08561e-05
comp2230534_c0_seq1	1	0.943437	0.000333352	0.0361705	0.0197758	0.000283187
comp2230600_c0_seq1	2	0.137031	0.346654	0.343964	0.0893995	0.0829519
comp2230895_c0_seq3	4	0.219105	0.000703842	0.358759	0.420868	0.000563758
comp2230914_c0_seq1	4	0.0269137	0.000139844	0.0143979	0.9584	0.000148243
gnl_Pdu_trscr_assembly_1_10787	1	0.934799	0.000398357	0.024722	0.0396624	0.000418509
comp2230935_c0_seq1	5	0.00505044	0.0446517	0.00494087	0.0058925	0.939464
comp2231093_c0_seq1	1	0.989248	1.83878e-05	0.00292995	0.007786	1.77148e-05
comp2231106_c0_seq2	1	0.966498	0.00026865	0.0155373	0.0174309	0.000264693
comp2231128_c0_seq2	4	0.00247195	1.44187e-05	0.00309079	0.994409	1.35513e-05
comp2231158_c0_seq3	2	0.00033297	0.826306	0.000475152	0.000303313	0.172582
comp2231206_c0_seq1	5	0.00326799	0.0351904	0.00296989	0.00313453	0.955437
comp2231262_c0_seq2	2	0.0061162	0.920058	0.0130794	0.00554627	0.0552004
comp2231262_c1_seq3	3	0.0271751	0.00169109	0.855265	0.11494	0.000928748
comp2231285_c0_seq1	2	0.00605359	0.851243	0.0111394	0.00619933	0.125365
gnl_Pdu_trscr_assembly_1_22617	5	0.000438651	0.0125774	0.000462501	0.000441488	0.98608
comp2231470_c0_seq1	4	0.0665191	6.93875e-05	0.0141152	0.919227	6.96856e-05
comp2231595_c0_seq1	5	0.0136114	0.382914	0.0200154	0.0167768	0.566683
comp2231632_c0_seq2	5	0.000295185	0.0104833	0.000334473	0.000324831	0.988562
comp2231722_c0_seq1	3	0.326829	0.00120679	0.532845	0.138237	0.000882523
comp2231741_c0_seq1	2	0.00527086	0.536688	0.00736053	0.00516398	0.445517
comp2231842_c0_seq1	2	0.0143459	0.513573	0.0231493	0.0167006	0.432231
comp2231854_c0_seq1	5	0.00993104	0.0604468	0.00782928	0.00889193	0.912901
comp2231865_c0_seq1	4	0.00407	1.51502e-05	0.00245559	0.993444	1.54017e-05
comp2231945_c0_seq2	2	0.000361279	0.991151	0.000812533	0.000376784	0.00729818
comp2231993_c0_seq1	5	0.00225829	0.263682	0.00289972	0.00219038	0.72897
comp2231997_c0_seq1	2	0.000180683	0.993002	0.000369922	0.000192405	0.00625452
comp2232024_c0_seq1	4	0.0152746	9.55687e-05	0.0399056	0.944645	7.87842e-05
comp2232048_c0_seq1	1	0.98746	3.67441e-05	0.00480595	0.00766261	3.47542e-05
comp2232050_c0_seq1	2	0.000193473	0.949046	0.00029228	0.00018298	0.0502853
comp2232057_c0_seq1	5	0.0226202	0.278906	0.0263321	0.022418	0.649723
comp2232065_c0_seq1	5	0.00760175	0.117538	0.00742836	0.00689386	0.860539
comp2232067_c0_seq2	4	0.107298	2.71517e-05	0.0131261	0.879524	2.51183e-05
comp2232211_c0_seq1	3	0.022616	0.000293517	0.937887	0.0390325	0.000170965
comp2232252_c0_seq2	5	0.00113546	0.0260721	0.00120428	0.00116014	0.970428
comp2232263_c0_seq1	1	0.927513	2.59742e-05	0.00592951	0.0665052	2.58006e-05
comp2232271_c0_seq1	4	0.0053498	4.70045e-05	0.00963302	0.984927	4.29221e-05
comp2232290_c0_seq2	2	0.000801714	0.947413	0.00131296	0.00075978	0.0497124
comp2232303_c0_seq2	2	0.000403418	0.692912	0.000574417	0.000381435	0.305728
comp2232305_c0_seq1	2	0.00200291	0.94124	0.00343571	0.00168613	0.0516355
comp2232388_c0_seq1	5	0.000563296	0.0325073	0.000592851	0.000480948	0.965856
comp2232392_c0_seq1	4	0.228716	9.31331e-05	0.0429741	0.728133	8.41396e-05
comp2232414_c0_seq1	2	0.0127581	0.60677	0.0186273	0.0129304	0.348914
comp2232415_c0_seq1	5	0.000943465	0.473576	0.00132387	0.000908153	0.523248
comp2232461_c0_seq1	4	0.0486296	0.00091211	0.273811	0.675945	0.000702361
comp2232491_c0_seq2	5	0.00369672	0.0529563	0.00340557	0.00339719	0.936544
comp2232496_c0_seq2	2	0.000689406	0.836833	0.0010472	0.000685513	0.160745
comp2232497_c0_seq1	5	0.00146311	0.0379122	0.00151199	0.00142567	0.957687
comp2232518_c0_seq1	1	0.578181	7.151e-05	0.0826606	0.339028	5.96192e-05
comp2232521_c0_seq2	3	0.102095	0.000155846	0.864148	0.0335006	0.000100867
comp2232535_c0_seq2	1	0.928747	0.000198757	0.0350051	0.0358705	0.000178589
comp2232559_c0_seq1	1	0.664331	0.00114918	0.0398936	0.293062	0.00156336
comp2232623_c0_seq1	2	0.000680372	0.711165	0.00103995	0.00073008	0.286384
comp2232641_c0_seq7	3	0.107767	0.000442071	0.457535	0.433924	0.000332149
gnl_Pdu_trscr_assembly_1_15874	4	0.398146	0.00513908	0.0853698	0.503328	0.00801727
comp2232773_c0_seq1	5	0.00124677	0.0228577	0.00130831	0.00141887	0.973168
comp2232787_c0_seq1	5	7.48489e-05	0.00332234	7.8711e-05	7.02622e-05	0.996454
comp2232805_c0_seq1	1	0.986902	4.16719e-05	0.00755233	0.00546864	3.57003e-05
comp2232817_c0_seq2	4	0.000489081	1.49696e-06	0.000411117	0.999097	1.40889e-06
comp2232850_c0_seq1	1	0.999639	5.1068e-07	0.000120344	0.000239676	4.71889e-07
comp2232905_c0_seq1	2	0.00149989	0.960014	0.00314472	0.00156153	0.0337796
comp2232946_c0_seq2	5	0.000536791	0.0222159	0.000593238	0.000520856	0.976133
comp2232992_c0_seq1	2	0.000205393	0.98769	0.000375051	0.000204834	0.0115243
comp2233004_c0_seq1	2	0.00124001	0.937497	0.00226028	0.00125573	0.0577467
comp2233022_c0_seq2	5	0.00347284	0.194566	0.00423466	0.00335276	0.794373
comp2233035_c0_seq1	2	0.000368494	0.76829	0.000553937	0.000366745	0.230421
comp2233052_c0_seq5	5	0.00142309	0.0215127	0.00133097	0.00136741	0.974366
comp2233064_c0_seq1	1	0.916909	0.000560335	0.0303469	0.0515993	0.000584566
comp2233085_c0_seq1	4	0.0652452	0.00179869	0.0693441	0.86157	0.00204171
comp2233110_c0_seq1	4	0.0167375	0.000126025	0.0422402	0.940789	0.000106814
comp2233130_c0_seq1	4	0.00111508	2.64764e-06	0.00145351	0.997426	2.31733e-06
comp2233142_c0_seq1	2	0.00143374	0.912261	0.00225647	0.00130255	0.0827461
comp2233168_c0_seq1	2	0.00074334	0.778661	0.00112896	0.00072014	0.218746
comp2233251_c0_seq1	5	0.00510089	0.193023	0.00586862	0.00502001	0.790987
comp2233266_c0_seq1	1	0.834846	0.0001125	0.0126301	0.152289	0.000122354
comp2233319_c0_seq1	4	0.00491085	4.14306e-05	0.0112098	0.983801	3.65024e-05
comp2233346_c0_seq2	5	0.000168184	0.0134119	0.000198552	0.000165973	0.986055
comp2233399_c0_seq1	5	0.00107699	0.0182482	0.00101805	0.00100257	0.978654
comp2233405_c0_seq3	5	0.000272968	0.00932619	0.000295239	0.000272565	0.989833
gnl_Pdu_trscr_assembly_1_334671	1	0.974174	6.44533e-05	0.0136356	0.0120711	5.52738e-05
comp2233474_c0_seq1	5	0.0181823	0.0844711	0.0146786	0.0179733	0.864695
comp2233526_c0_seq1	2	0.00221567	0.954408	0.00483425	0.00231466	0.036227
comp2233551_c0_seq2	4	0.0358823	0.00135366	0.0865994	0.874904	0.00126084
comp2233616_c0_seq2	5	0.00339796	0.388023	0.00432697	0.00321014	0.601042
comp2233646_c0_seq2	1	0.975118	1.06818e-05	0.00400587	0.020856	9.79698e-06
comp2233685_c0_seq1	4	0.014589	0.000206945	0.0275288	0.957483	0.000192434
comp2233698_c0_seq1	1	0.845296	0.000686478	0.0676679	0.0856779	0.000671871
comp2233700_c0_seq1	5	0.00184784	0.438495	0.00247242	0.00176334	0.555421
comp2233700_c1_seq1	2	0.00349806	0.663083	0.00497039	0.00327325	0.325175
comp2233710_c0_seq1	5	0.0174395	0.0590754	0.0124031	0.0155667	0.895515
comp2233720_c0_seq1	2	0.00013056	0.99293	0.00023796	0.000124191	0.00657759
comp2233759_c0_seq1	5	0.000954013	0.0213402	0.000947692	0.000895564	0.975863
comp2233761_c0_seq1	2	0.000100791	0.996639	0.000209217	0.000100684	0.00295063
comp2233803_c0_seq1	5	0.000926479	0.326296	0.00127847	0.000934357	0.670565
gnl_Pdu_trscr_assembly_1_1108	5	0.000344029	0.10366	0.000442245	0.000337582	0.895217
comp2233841_c0_seq1	5	0.00336409	0.103071	0.00381815	0.00333673	0.88641
comp2233909_c0_seq2	2	0.00554492	0.90783	0.0121891	0.00591983	0.0685162
comp2234032_c0_seq1	5	0.00264815	0.109295	0.0028813	0.00242521	0.882751
comp2234049_c0_seq2	5	0.0039213	0.047653	0.00416527	0.00486861	0.939392
comp2234079_c0_seq2	2	0.00306603	0.814971	0.00611138	0.00406288	0.171788
gnl_Pdu_trscr_assembly_1_18157	5	0.00352261	0.0572789	0.00384232	0.00403708	0.931319
comp2234125_c0_seq2	5	0.0023053	0.0405307	0.00234611	0.00243901	0.952379
comp2234139_c0_seq1	4	0.317298	6.86973e-05	0.0230838	0.659483	6.57394e-05
comp2234148_c0_seq2	2	0.0248902	0.695126	0.044301	0.0230465	0.212637
comp2234167_c0_seq3	1	0.737669	0.000135742	0.098971	0.16311	0.000113384
comp2234171_c0_seq1	1	0.992585	9.18385e-06	0.00138311	0.00601319	9.33041e-06
comp2234206_c0_seq1	5	0.00398081	0.0783049	0.00379497	0.00335296	0.910566
comp2234217_c0_seq1	4	0.442148	0.00048027	0.0287923	0.527989	0.000590046
comp2234242_c0_seq1	2	0.000322349	0.984306	0.000565447	0.000296643	0.0145099
comp2234253_c0_seq3	1	0.998473	2.1737e-06	0.000408813	0.00111362	2.0914e-06
comp2234282_c0_seq1	4	0.00166649	7.39255e-06	0.00320972	0.99511	6.47651e-06
comp2234324_c0_seq2	4	0.0186503	0.000372652	0.0423276	0.938308	0.000341669
comp2234386_c0_seq2	5	0.0092302	0.0828486	0.00940714	0.0110824	0.887432
comp2234405_c0_seq1	1	0.975896	9.30581e-05	0.00577278	0.018133	0.000104875
comp2234410_c0_seq1	1	0.919111	0.000122581	0.0447503	0.0359107	0.000104999
comp2234451_c0_seq4	4	0.0738585	3.85202e-05	0.0434199	0.882651	3.21488e-05
comp2234453_c0_seq2	2	0.000333681	0.98881	0.000652749	0.000334826	0.00986918
comp2234463_c0_seq2	1	0.796214	0.00739712	0.117159	0.0722674	0.00696281
comp2234549_c0_seq1	2	0.00197327	0.94406	0.00367898	0.00185831	0.0484295
comp2234598_c0_seq1	5	0.0060796	0.0661059	0.00589819	0.0066413	0.915275
comp2234658_c0_seq1	4	0.0206047	0.000379811	0.0554453	0.92323	0.000340546
comp2234664_c1_seq2	5	0.00280192	0.0341786	0.00245469	0.00255072	0.958014
comp2234671_c0_seq1	1	0.730037	7.41277e-05	0.0796159	0.190211	6.10496e-05
comp2234677_c0_seq1	5	0.00400241	0.117913	0.00449514	0.00375087	0.869838
comp2234772_c0_seq1	5	0.00215889	0.0735482	0.00239742	0.00202588	0.91987
comp2234777_c0_seq2	4	0.325935	4.74072e-05	0.0225324	0.651442	4.34265e-05
comp2234851_c0_seq3	2	0.00130276	0.917749	0.00217142	0.0012768	0.0774999
comp2234888_c0_seq2	4	0.0258679	1.39937e-05	0.010052	0.964054	1.22724e-05
comp2234923_c0_seq1	5	0.00229577	0.244068	0.00278901	0.00217717	0.74867
comp2234980_c0_seq1	4	0.113645	0.000236656	0.0242811	0.861576	0.000260777
comp2234981_c0_seq2	1	0.866106	0.00244597	0.0537127	0.0749042	0.00283116
comp2235003_c0_seq2	4	0.0281435	0.00064732	0.111469	0.859211	0.000529653
comp2235040_c0_seq1	4	0.396955	0.00010325	0.0687419	0.534111	8.86931e-05
comp2235052_c0_seq1	1	0.998983	2.16345e-06	0.000419967	0.000592555	1.98533e-06
comp2235060_c1_seq1	5	0.000869303	0.0676732	0.00093868	0.000728061	0.929791
comp2235108_c0_seq1	2	0.00305641	0.917243	0.00599413	0.00312377	0.070583
gnl_Pdu_trscr_assembly_1_219156	5	0.011183	0.168803	0.0107284	0.00958122	0.799705
comp2235151_c0_seq1	5	0.00181912	0.0319306	0.00199514	0.00209103	0.962164
comp2235153_c0_seq1	4	0.298713	0.0220139	0.14948	0.490338	0.0394555
comp2235168_c0_seq1	1	0.821509	0.000329279	0.0868267	0.0910429	0.000292261
comp2235205_c0_seq1	4	0.00327992	3.24794e-06	0.000836928	0.995877	3.21181e-06
comp2235212_c0_seq1	2	0.102267	0.407453	0.289233	0.0959741	0.105073
comp2235289_c1_seq1	2	0.0501528	0.611348	0.0952283	0.0511842	0.192087
comp2235301_c0_seq1	2	0.000556328	0.886756	0.000883716	0.000539311	0.111265
comp2235302_c0_seq1	3	0.189378	0.000107823	0.503845	0.306588	8.12889e-05
comp2235322_c0_seq1	2	0.00104351	0.972345	0.00209733	0.00102621	0.0234883
gnl_Pdu_trscr_assembly_1_95352	5	0.00185153	0.0430715	0.00199391	0.00195504	0.951128
comp2235330_c0_seq1	1	0.91596	0.00117751	0.0481201	0.0336449	0.0010973
comp2235332_c0_seq1	4	0.00122919	3.18629e-06	0.00199541	0.996769	2.74215e-06
comp2235392_c0_seq1	4	0.00442823	3.36006e-05	0.00821829	0.98729	3.0183e-05
comp2235400_c0_seq1	5	0.233119	0.0867692	0.10518	0.203435	0.371497
comp2235404_c0_seq1	5	0.00198777	0.0350606	0.00206082	0.00211841	0.958772
comp2235412_c1_seq2	1	0.824397	9.66448e-05	0.109478	0.0659531	7.52701e-05
comp2235459_c0_seq2	4	0.109236	0.000579527	0.0305023	0.858981	0.000701838
comp2235488_c0_seq1	5	0.000727905	0.122242	0.000923357	0.000692069	0.875414
comp2235543_c0_seq2	4	0.00159503	6.57964e-06	0.00135169	0.99704	6.38369e-06
comp2235557_c0_seq3	2	0.000319565	0.971542	0.000576599	0.000343495	0.0272183
comp2235567_c0_seq1	4	0.0150747	2.57253e-05	0.00622792	0.978647	2.49633e-05
comp2235658_c0_seq1	1	0.654194	9.02723e-05	0.0728343	0.272804	7.70035e-05
comp2235681_c0_seq1	3	0.0278045	0.000509001	0.622433	0.348916	0.000336777
comp2235690_c0_seq1	2	0.000284599	0.977597	0.000507577	0.000278795	0.0213321
comp2235701_c1_seq1	2	0.00130891	0.949903	0.00249428	0.00129661	0.0449972
comp2235755_c0_seq2	1	0.935776	0.000794202	0.0266018	0.0359625	0.00086575
comp2235766_c0_seq1	2	0.00888817	0.654667	0.014627	0.00915476	0.312663
comp2235779_c0_seq1	2	0.00488758	0.919234	0.0108214	0.00481467	0.0602428
comp2235788_c0_seq1	5	0.000817208	0.136338	0.00103678	0.000766719	0.861041
comp2235819_c0_seq2	1	0.97387	0.000146514	0.0140571	0.0117923	0.000133985
comp2235826_c0_seq2	4	0.0153978	9.76736e-05	0.0125069	0.9719	9.76993e-05
comp2235851_c0_seq1	5	0.00188406	0.032118	0.00179923	0.00175855	0.96244
comp2235913_c0_seq4	4	0.378152	0.00141415	0.0430018	0.575433	0.00199949
comp2235924_c0_seq2	2	0.0032642	0.609822	0.0044702	0.00296059	0.379484
comp2235947_c0_seq2	5	0.00219705	0.048472	0.00224143	0.0020962	0.944993
comp2235954_c0_seq1	4	0.0635553	0.00306208	0.399677	0.531567	0.00213832
comp2236033_c0_seq1	2	0.00154879	0.772639	0.00266907	0.00176534	0.221377
comp2236050_c0_seq1	1	0.723329	0.000610865	0.183774	0.0918231	0.000462414
comp2236053_c0_seq4	2	0.0328565	0.580405	0.0547678	0.0345337	0.297437
comp2236069_c0_seq3	5	0.000515917	0.337837	0.000718126	0.000507888	0.660422
comp2236094_c0_seq1	2	0.00279975	0.946546	0.00606575	0.00283717	0.0417512
comp2236094_c1_seq1	2	0.00170582	0.94833	0.00346279	0.00177435	0.0447267
comp2236155_c0_seq1	1	0.818833	4.03907e-05	0.0325089	0.148583	3.47015e-05
comp2236190_c0_seq1	4	0.123197	0.057359	0.369264	0.404081	0.0460998
comp2236208_c0_seq1	2	0.000607808	0.727968	0.000861656	0.000552022	0.270011
comp2236218_c0_seq2	2	0.00370523	0.908806	0.00683466	0.00361688	0.0770371
comp2236259_c0_seq1	2	0.000511077	0.742757	0.000772648	0.000522918	0.255437
comp2236285_c0_seq1	2	0.000945802	0.920001	0.00169221	0.00102801	0.0763333
comp2236289_c0_seq1	3	0.00829896	0.000177149	0.958398	0.0330227	0.000102683
comp2236304_c0_seq1	4	0.00104381	1.44502e-06	0.000586137	0.998367	1.33782e-06
comp2236313_c0_seq1	1	0.907961	0.00142582	0.0380169	0.0509712	0.00162462
comp2236331_c0_seq1	5	0.00276274	0.0432003	0.00285948	0.00280872	0.948369
comp2236360_c0_seq3	4	0.0383438	3.32037e-05	0.0057822	0.955806	3.48694e-05
comp2236375_c0_seq1	2	0.00141633	0.760282	0.00200516	0.00125683	0.235039
comp2236391_c0_seq3	3	0.0918079	0.00171114	0.664834	0.240478	0.00116983
comp2236509_c0_seq6	2	0.000235751	0.975902	0.000408022	0.00024471	0.0232098
comp2236520_c0_seq2	5	0.00163122	0.0531259	0.00193782	0.00180754	0.941498
comp2236530_c0_seq1	5	0.000719305	0.419519	0.000980213	0.000669328	0.578112
gnl_Pdu_trscr_assembly_1_11607	5	0.000617234	0.118281	0.00078502	0.000610845	0.879706
comp2236614_c0_seq1	2	0.00164394	0.974654	0.00363857	0.00156458	0.018499
comp2236624_c0_seq1	4	0.0449708	5.29452e-05	0.00652561	0.948393	5.8002e-05
comp2236625_c0_seq1	5	0.00217657	0.0386314	0.0024791	0.0027316	0.953981
comp2236689_c0_seq1	2	0.00914189	0.901278	0.0258856	0.0107031	0.0529911
comp2236696_c0_seq1	3	0.285871	0.000376651	0.502808	0.210673	0.000271345
comp2236712_c0_seq2	5	0.000627266	0.0427956	0.000751446	0.000615799	0.95521
comp2236727_c0_seq1	2	2.03122e-05	0.998971	3.86165e-05	1.97346e-05	0.000950348
comp2236834_c0_seq1	3	0.119774	0.000147686	0.816052	0.0639262	0.000100172
gnl_Pdu_trscr_assembly_1_204119	4	0.30157	0.000583215	0.0432586	0.653907	0.000680991
comp2236889_c0_seq1	4	0.00170184	1.85134e-06	0.000721365	0.997573	1.7228e-06
comp2236891_c0_seq1	5	0.000541725	0.437739	0.000780718	0.000559172	0.560379
comp2236910_c0_seq2	4	0.211466	0.0684645	0.133551	0.383267	0.203251
comp2236959_c0_seq1	4	0.00387107	2.90318e-05	0.00650661	0.989567	2.65451e-05
comp2236987_c0_seq1	2	0.000591166	0.792291	0.000886028	0.000589577	0.205642
comp2237006_c0_seq2	2	0.00165176	0.58236	0.00245064	0.00164678	0.411891
comp2237007_c0_seq2	4	0.00534964	4.09985e-05	0.0124752	0.982098	3.58853e-05
comp2237065_c0_seq1	4	0.236045	0.00611383	0.0923229	0.655959	0.00955923
comp2237121_c0_seq1	1	0.561075	5.52382e-05	0.0440037	0.394818	4.77958e-05
comp2237124_c0_seq1	4	0.0253901	0.00020141	0.0373508	0.936874	0.000183368
comp2237126_c0_seq1	2	0.000750381	0.976567	0.0015319	0.000749492	0.0204008
comp2237127_c0_seq1	5	0.00220327	0.0803302	0.00239113	0.00202883	0.913047
comp2237146_c0_seq1	1	0.818564	0.00209077	0.0454092	0.131001	0.00293511
gnl_Pdu_trscr_assembly_1_3163	5	0.0461826	0.093943	0.0306229	0.039432	0.789819
gnl_Pdu_trscr_assembly_1_4160	2	0.00206498	0.772141	0.00321103	0.00203324	0.220549
comp2237170_c0_seq1	2	0.00085387	0.933566	0.00141975	0.000817544	0.0633428
comp2237173_c0_seq6	2	0.00217708	0.850305	0.00351961	0.00221033	0.141788
comp2237192_c0_seq1	4	0.0408199	3.64307e-05	0.00999708	0.949111	3.59216e-05
comp2237222_c0_seq1	4	0.325907	0.000243987	0.0336676	0.639929	0.000252468
comp2237241_c0_seq1	2	0.00067011	0.742792	0.000962696	0.000634731	0.25494
comp2237248_c1_seq1	5	0.00283811	0.0271217	0.00239871	0.00258111	0.96506
comp2237250_c0_seq1	2	0.00120182	0.760174	0.00178942	0.00119074	0.235644
comp2237264_c0_seq1	5	0.00339994	0.164235	0.00437168	0.00344027	0.824553
comp2237274_c0_seq1	2	0.00532361	0.534125	0.00730975	0.00494748	0.448294
comp2237292_c0_seq1	5	0.0855052	0.180659	0.0709455	0.0865718	0.576319
comp2237333_c0_seq1	2	0.0282339	0.680074	0.0529297	0.0295926	0.20917
comp2237339_c0_seq1	1	0.997804	2.74089e-06	0.000627891	0.00156319	2.59759e-06
comp2237345_c0_seq1	2	0.00565504	0.509053	0.00828396	0.00600745	0.471
comp2237365_c0_seq1	1	0.967171	0.00023738	0.0182967	0.0140785	0.000216501
comp2237367_c0_seq1	2	0.00122515	0.976212	0.00276257	0.00123144	0.0185693
comp2237419_c0_seq1	5	0.000177836	0.0096264	0.000200358	0.000182248	0.989813
comp2237429_c0_seq1	2	0.000627831	0.986186	0.00141263	0.000633465	0.0111397
comp2237431_c0_seq3	3	0.133051	0.18909	0.464475	0.143392	0.0699923
comp2237444_c0_seq1	1	0.899028	0.00199473	0.0475701	0.0492664	0.00214047
comp2237453_c0_seq1	1	0.997627	3.17803e-06	0.00116895	0.00119834	2.73201e-06
comp2237456_c0_seq1	5	0.000367462	0.00847212	0.00037259	0.000370088	0.990418
comp2237516_c0_seq1	4	0.171587	0.000170283	0.0350873	0.792989	0.00016555
comp2237558_c0_seq1	5	0.0022462	0.0823132	0.00260808	0.00234781	0.910485
comp2237623_c0_seq2	2	0.000153408	0.980687	0.000264807	0.00015239	0.0187426
comp2237681_c0_seq1	5	0.00475156	0.036762	0.00436816	0.0052305	0.948888
comp2237821_c0_seq1	1	0.883256	0.000622426	0.0834056	0.0322295	0.000486568
comp2237870_c0_seq1	3	0.117626	0.0166148	0.529858	0.325228	0.0106733
comp2237892_c0_seq1	2	0.00156602	0.963344	0.00326333	0.00165119	0.0301751
comp2237921_c0_seq1	5	0.0261649	0.269832	0.0276845	0.0241769	0.652142
comp2237937_c0_seq2	5	0.00336703	0.041233	0.00318628	0.00323399	0.94898
comp2237963_c0_seq1	2	0.000283393	0.991163	0.00059734	0.000288896	0.00766768
comp2238012_c0_seq1	1	0.628835	0.000133806	0.0416826	0.329227	0.000121712
comp2238068_c1_seq2	5	0.000865199	0.0138012	0.000809772	0.00083283	0.983691
comp2238086_c0_seq1	2	0.00730093	0.772847	0.013221	0.00792413	0.198707
comp2238146_c0_seq2	5	0.0123386	0.078405	0.00986069	0.0108614	0.888534
comp2238180_c0_seq2	2	0.00281483	0.652571	0.00375289	0.00251429	0.338347
comp2238188_c0_seq1	3	0.0287265	0.000953833	0.805227	0.164512	0.000580423
gnl_Pdu_trscr_assembly_1_10793	3	0.0441477	0.00554331	0.894726	0.0532899	0.00229278
comp2238294_c0_seq3	2	0.000412541	0.983183	0.0007809	0.00040135	0.0152225
comp2238344_c0_seq1	2	9.20988e-05	0.985768	0.000148326	8.58842e-05	0.0139057
comp2238374_c0_seq1	2	0.000485818	0.844937	0.000738635	0.000478988	0.153359
comp2238422_c0_seq1	5	0.000448314	0.0150923	0.000473737	0.000432539	0.983553
comp2238451_c0_seq1	4	0.032283	5.26938e-05	0.00696107	0.960647	5.63183e-05
comp2238516_c0_seq1	5	0.00337139	0.355354	0.00413768	0.00299462	0.634142
comp2238583_c0_seq1	5	0.000674744	0.263684	0.000942575	0.000698513	0.734001
comp2238602_c0_seq1	1	0.933671	5.89487e-05	0.0379187	0.0283038	4.73059e-05
comp2238617_c0_seq1	5	0.000476087	0.378908	0.000646472	0.000444074	0.619526
comp2238675_c0_seq2	2	0.103497	0.339037	0.309658	0.128849	0.11896
comp2238682_c0_seq2	4	0.00274183	2.54589e-06	0.00120096	0.996052	2.32223e-06
comp2238688_c0_seq1	2	0.00461696	0.790634	0.00693345	0.00425552	0.19356
comp2238725_c0_seq1	2	0.0129399	0.743941	0.0188469	0.0113277	0.212944
comp2238730_c0_seq1	2	0.00227174	0.859692	0.00367359	0.00216515	0.132198
comp2238758_c0_seq1	1	0.782356	0.00948723	0.11796	0.0806857	0.00951086
comp2238786_c0_seq4	5	0.000115867	0.0117958	0.000138109	0.000113377	0.987837
comp2238789_c0_seq1	1	0.99349	4.93582e-06	0.00128044	0.00521986	4.71628e-06
comp2238873_c0_seq1	5	0.025233	0.108661	0.0216774	0.0255476	0.818881
comp2238888_c1_seq2	2	0.000372866	0.961544	0.000631536	0.000370251	0.0370812
comp2238915_c0_seq1	2	0.0011787	0.736167	0.00172477	0.00116702	0.259763
comp2238985_c0_seq1	2	0.000239333	0.975691	0.000396876	0.000234558	0.0234386
comp2239036_c0_seq1	5	0.00140981	0.0385902	0.00146211	0.00129062	0.957247
comp2239040_c0_seq1	2	1.97852e-05	0.998766	3.67917e-05	1.9228e-05	0.00115782
comp2239046_c0_seq2	2	0.00200036	0.946446	0.0042517	0.00218091	0.0451211
comp2239053_c0_seq1	3	0.113734	0.124373	0.554318	0.163377	0.0441979
comp2239091_c1_seq1	5	0.000305086	0.318811	0.000417804	0.00029616	0.68017
comp2239172_c0_seq2	2	0.00102658	0.711605	0.00160851	0.00105587	0.284704
comp2239188_c1_seq1	5	0.00708869	0.0454566	0.00562919	0.00626018	0.935565
comp2239213_c0_seq1	5	0.00503921	0.402165	0.00684768	0.0049751	0.580973
comp2239270_c0_seq3	5	0.0142963	0.127608	0.0147089	0.01446	0.828926
comp2239331_c0_seq1	4	0.190745	4.89287e-05	0.0133726	0.795786	4.77684e-05
comp2239374_c1_seq2	2	0.00397447	0.921342	0.00747122	0.00391984	0.0632923
comp2239379_c0_seq1	2	0.00638985	0.640047	0.00878423	0.00578144	0.338997
comp2239384_c0_seq1	5	0.000386952	0.174474	0.000516484	0.000378303	0.824245
comp2239388_c0_seq2	2	0.00261148	0.960896	0.00579073	0.00257594	0.0281262
comp2239400_c0_seq1	5	0.00273908	0.0533052	0.0027383	0.00252657	0.938691
comp2239440_c0_seq1	2	0.145027	0.385524	0.277669	0.085396	0.106384
comp2239441_c0_seq1	5	0.00159022	0.237733	0.00202615	0.00145461	0.757196
comp2239480_c0_seq1	4	0.00785406	7.51744e-05	0.0133902	0.978611	6.91927e-05
comp2239483_c0_seq1	2	0.00458019	0.833866	0.00798582	0.00461622	0.148952
comp2239485_c0_seq1	5	0.0407971	0.13836	0.0300417	0.0337022	0.757099
comp2239495_c0_seq1	2	0.00704154	0.713477	0.0110945	0.00685166	0.261536
comp2239524_c0_seq2	1	0.997569	5.31673e-06	0.000999295	0.00142171	4.85184e-06
comp2239531_c0_seq1	4	0.0737431	2.17468e-05	0.00950047	0.916715	2.02085e-05
comp2239542_c0_seq1	5	0.00246447	0.0266971	0.00221962	0.00244859	0.96617
comp2239558_c0_seq1	1	0.998404	3.37023e-06	0.000711073	0.000878942	3.0227e-06
comp2239573_c0_seq1	4	0.136556	3.98644e-05	0.0322457	0.831124	3.49057e-05
comp2239593_c0_seq2	5	0.00423172	0.462347	0.00554593	0.00401691	0.523858
comp2239600_c0_seq1	2	0.000969908	0.934168	0.0017335	0.000974456	0.0621537
comp2239613_c0_seq2	5	0.00264962	0.465398	0.00356331	0.00263811	0.525751
comp2239647_c0_seq1	4	0.270245	0.00588088	0.0754385	0.638294	0.010141
comp2239673_c0_seq1	5	0.000423761	0.0270744	0.00050004	0.000431084	0.971571
gnl_Pdu_trscr_assembly_1_16731	5	0.00247958	0.0283252	0.0022575	0.00231871	0.964619
comp2239691_c0_seq1	2	5.20968e-05	0.996104	9.33512e-05	5.22884e-05	0.00369827
comp2239692_c0_seq1	5	0.000652903	0.0119121	0.00062154	0.000637691	0.986176
comp2239693_c0_seq2	2	0.00708558	0.546348	0.0106203	0.00731309	0.428633
gnl_Pdu_trscr_assembly_1_9334	2	0.00161206	0.852645	0.00252933	0.00155917	0.141654
comp2239700_c0_seq2	5	0.00528255	0.128172	0.00682429	0.00676183	0.852959
comp2239709_c0_seq1	1	0.991094	7.50073e-06	0.00282561	0.00606603	6.65308e-06
comp2239730_c1_seq1	5	0.0165426	0.0630079	0.0130726	0.0168399	0.890537
comp2239747_c0_seq2	4	0.257439	0.000479318	0.179621	0.562048	0.000413682
comp2239763_c0_seq1	2	0.0017798	0.555787	0.00264715	0.00178583	0.438001
comp2239763_c1_seq4	5	0.000505871	0.170854	0.000701659	0.000540251	0.827399
comp2239776_c0_seq1	4	0.0284762	0.000659932	0.0842857	0.886002	0.000576368
comp2239785_c0_seq3	5	0.000147029	0.0104038	0.000164367	0.000139748	0.989145
comp2239858_c0_seq1	4	0.00278655	1.75331e-05	0.00453345	0.992647	1.59095e-05
comp2239861_c0_seq2	5	0.00660351	0.0549047	0.0059687	0.00668492	0.925838
comp2239883_c0_seq1	2	0.0174713	0.756461	0.0400543	0.0226101	0.163403
comp2239902_c0_seq1	5	0.0116833	0.375567	0.0162808	0.0127396	0.58373
comp2239917_c0_seq1	2	0.00363741	0.702397	0.00521663	0.00326301	0.285486
comp2239924_c0_seq1	4	0.23419	0.000153528	0.0387858	0.726725	0.000145988
comp2239935_c0_seq1	5	0.00345185	0.0518249	0.00388756	0.00423868	0.936597
comp2239939_c0_seq1	1	0.975759	6.45817e-05	0.00949209	0.0146241	6.00804e-05
comp2239961_c0_seq1	5	0.000354435	0.199658	0.000491042	0.000351855	0.799145
comp2239973_c0_seq1	1	0.473712	0.0975003	0.186404	0.128695	0.113688
comp2239992_c0_seq1	1	0.999617	5.7646e-07	0.000122872	0.000258851	5.39703e-07
comp2240028_c0_seq3	5	0.0003394	0.0551001	0.000453802	0.000363444	0.943743
comp2240069_c0_seq1	4	0.00722584	1.14987e-05	0.0114924	0.981261	9.63696e-06
comp2240071_c0_seq2	2	0.000524824	0.948513	0.000798602	0.000448537	0.0497153
comp2240078_c0_seq1	1	0.965091	4.16852e-05	0.00651929	0.0283051	4.25954e-05
comp2240080_c0_seq1	5	0.0296952	0.154415	0.0263158	0.0291516	0.760422
comp2240131_c0_seq3	1	0.995353	1.008e-05	0.00253529	0.00209323	8.70998e-06
comp2240144_c0_seq1	1	0.905405	5.74442e-05	0.0134263	0.0810545	5.64826e-05
comp2240147_c0_seq1	4	0.0304022	3.78506e-05	0.0409776	0.928551	3.11392e-05
comp2240169_c0_seq2	2	0.00655001	0.849583	0.0121492	0.00628471	0.125433
comp2240180_c1_seq1	3	0.279225	0.0347369	0.351319	0.3055	0.0292191
comp2240190_c0_seq1	4	0.307861	0.000254066	0.0788002	0.61286	0.000224999
comp2240211_c0_seq1	2	0.00112148	0.533466	0.0016637	0.00112181	0.462627
gnl_Pdu_trscr_assembly_1_10869	1	0.837699	6.87571e-05	0.109103	0.0530763	5.33054e-05
comp2240222_c0_seq1	1	0.937198	1.92227e-05	0.00910433	0.0536609	1.73139e-05
comp2240234_c0_seq2	1	0.504073	0.00157455	0.0496733	0.442489	0.0021908
comp2240253_c0_seq1	1	0.940622	0.000187154	0.0309031	0.0281218	0.000165537
comp2240281_c0_seq1	5	0.000474842	0.0127617	0.000512499	0.000499746	0.985751
comp2240324_c0_seq2	1	0.539065	0.0216703	0.110229	0.28215	0.0468864
comp2240347_c0_seq3	1	0.989619	5.1594e-06	0.00185642	0.00851457	4.75147e-06
comp2240351_c0_seq2	2	0.000218573	0.992744	0.000473264	0.000232113	0.00633173
comp2240375_c0_seq4	3	0.110372	0.0158168	0.761549	0.105361	0.00690148
comp2240378_c0_seq1	5	0.000620708	0.0501778	0.000727942	0.000589448	0.947884
comp2240387_c0_seq3	5	0.0020587	0.0940426	0.00231891	0.00193584	0.899644
comp2240405_c0_seq1	2	0.000733167	0.957405	0.00119638	0.000679885	0.0399855
comp2240407_c0_seq1	5	0.000527328	0.172765	0.000672302	0.000495889	0.825539
comp2240411_c0_seq1	2	0.000949794	0.969064	0.00157129	0.0007769	0.0276378
comp2240418_c0_seq1	5	0.00100857	0.212754	0.00135207	0.00100337	0.783882
comp2240422_c0_seq2	4	0.0305976	0.000434695	0.0245388	0.943933	0.000495488
comp2240424_c0_seq2	1	0.973125	1.08593e-05	0.00635174	0.0205027	9.52794e-06
comp2240430_c0_seq1	2	0.0012334	0.670187	0.00173591	0.00110598	0.325737
comp2240448_c0_seq4	2	3.41889e-05	0.998454	6.61912e-05	3.35273e-05	0.0014121
comp2240462_c0_seq2	4	0.00807092	1.24427e-05	0.003028	0.988877	1.20895e-05
comp2240463_c0_seq1	4	0.00204047	6.56802e-06	0.00314593	0.994801	5.73423e-06
comp2240536_c0_seq3	5	8.25715e-05	0.0109117	0.000104008	8.80809e-05	0.988814
comp2240544_c0_seq4	2	0.00134074	0.774901	0.00200653	0.00131216	0.220439
comp2240549_c0_seq16	5	0.000348533	0.098876	0.000443234	0.000329372	0.900003
comp2240611_c0_seq1	1	0.632973	0.000945243	0.31596	0.0494724	0.0006485
gnl_Pdu_trscr_assembly_1_4305	5	0.00310601	0.395958	0.00414648	0.00299577	0.593794
gnl_Pdu_trscr_assembly_1_15590	2	0.00050087	0.986737	0.0010055	0.000495625	0.0112611
comp2240663_c0_seq3	5	0.0218895	0.0795892	0.0169012	0.0213826	0.860238
comp2240664_c0_seq1	2	0.000162183	0.9953	0.000348326	0.00016332	0.0040263
comp2240678_c0_seq1	1	0.99938	1.07517e-06	0.000244326	0.000374004	9.79948e-07
comp2240690_c0_seq1	2	0.00257465	0.933145	0.00618439	0.00337737	0.0547189
comp2240696_c0_seq1	5	0.000173001	0.020438	0.000220701	0.000187825	0.97898
gnl_Pdu_trscr_assembly_1_263854	2	0.000201618	0.987066	0.000336827	0.000182802	0.0122126
comp2240707_c0_seq1	4	0.282153	0.000531197	0.0639251	0.652859	0.00053114
comp2240732_c0_seq1	2	0.00342017	0.920325	0.00649916	0.00334367	0.0664118
comp2240741_c0_seq1	1	0.741566	0.00266781	0.136736	0.116713	0.00231823
comp2240767_c0_seq1	3	0.0136229	0.000106562	0.963202	0.023005	6.35405e-05
comp2240768_c0_seq1	3	0.105226	0.00696716	0.684942	0.199032	0.00383291
comp2240770_c0_seq3	5	0.0171051	0.0674348	0.0136939	0.0177547	0.884011
comp2240776_c0_seq2	2	0.000709855	0.977512	0.00148082	0.000779371	0.0195175
comp2240787_c0_seq3	2	0.000695779	0.956233	0.00128505	0.00071495	0.0410716
comp2240820_c0_seq1	5	0.00088732	0.0125058	0.000829728	0.0008896	0.984888
comp2240824_c0_seq1	4	0.0261564	2.62129e-05	0.00444829	0.969342	2.725e-05
comp2240825_c0_seq1	1	0.893543	0.000263924	0.0159787	0.0899087	0.000305276
comp2240830_c0_seq1	4	0.0494872	0.000110366	0.0696909	0.880619	9.23087e-05
comp2240833_c0_seq1	5	0.000254981	0.00952972	0.000279045	0.000266123	0.98967
comp2240840_c0_seq2	5	0.130605	0.103282	0.0848564	0.165871	0.515385
comp2240852_c1_seq1	1	0.436035	0.000259511	0.157409	0.406081	0.000215021
comp2240869_c0_seq1	5	0.000744539	0.0156439	0.000734518	0.0007164	0.982161
comp2240906_c0_seq1	2	0.00233157	0.932429	0.00425962	0.00225609	0.0587235
comp2240916_c0_seq1	5	3.26883e-05	0.00307054	3.86852e-05	3.29336e-05	0.996825
comp2240942_c0_seq2	1	0.947994	0.000125516	0.00843982	0.0432954	0.000145695
comp2240980_c0_seq1	2	0.00054841	0.953653	0.00088007	0.000514057	0.0444045
comp2241002_c0_seq1	4	0.285284	0.00013633	0.0179211	0.696509	0.000149362
comp2241005_c0_seq3	2	0.000448242	0.979498	0.000853511	0.000458642	0.0187411
comp2241007_c0_seq1	1	0.712026	0.00389471	0.0651053	0.213169	0.00580442
comp2241022_c0_seq1	5	0.000146395	0.0258413	0.000170927	0.000131143	0.97371
comp2241024_c0_seq1	5	0.00121738	0.0212717	0.00116252	0.00116157	0.975187
comp2241030_c0_seq1	5	0.0011236	0.322382	0.00155191	0.00109732	0.673845
comp2241047_c0_seq1	3	0.0785842	0.00032562	0.622562	0.298293	0.000234991
comp2241107_c1_seq1	2	8.00278e-05	0.995147	0.000146503	7.91982e-05	0.00454733
comp2241134_c0_seq1	5	0.000356854	0.453929	0.000504106	0.00034853	0.544862
gnl_Pdu_trscr_assembly_1_10194	3	0.221252	0.0100018	0.643181	0.11964	0.00592461
gnl_Pdu_trscr_assembly_1_18248	4	0.310285	0.000140733	0.0183729	0.67105	0.000151204
comp2241228_c0_seq2	5	0.00359833	0.0273227	0.00304655	0.00351013	0.962522
comp2241234_c0_seq2	2	0.00233942	0.925907	0.00419311	0.00225403	0.0653066
gnl_Pdu_trscr_assembly_1_264488	4	0.0400738	0.00159907	0.0982221	0.858645	0.00146033
comp2241266_c0_seq1	1	0.503264	0.0162185	0.100236	0.346195	0.0340869
comp2241296_c0_seq1	2	0.00465133	0.707812	0.00781192	0.00489751	0.274827
comp2241299_c0_seq1	5	0.00202565	0.0521416	0.00245848	0.00249543	0.940879
comp2241302_c0_seq1	5	0.00521521	0.0391033	0.00427197	0.00472816	0.946681
comp2241308_c0_seq1	5	0.000651951	0.276353	0.000901389	0.000658489	0.721435
comp2241377_c0_seq1	2	0.00128268	0.977631	0.0027587	0.00122905	0.0170984
comp2241380_c0_seq2	1	0.785491	0.00871842	0.120247	0.0771272	0.00841589
comp2241394_c0_seq1	5	0.0123334	0.147839	0.0129329	0.0116318	0.815263
comp2241420_c0_seq2	1	0.880609	0.00199534	0.0693769	0.0461602	0.00185886
comp2241437_c0_seq1	5	0.000926167	0.050038	0.00102353	0.000846979	0.947165
comp2241447_c0_seq1	2	0.00147789	0.793311	0.00196401	0.00119978	0.202047
comp2241498_c0_seq2	2	0.000660369	0.979966	0.00138841	0.000683569	0.017302
comp2241503_c0_seq1	4	0.00489406	1.07866e-05	0.0023153	0.992769	1.0803e-05
comp2241506_c0_seq1	2	0.000806006	0.505073	0.00115749	0.000803228	0.49216
comp2241507_c0_seq1	5	0.00163556	0.40489	0.00229891	0.00164551	0.58953
comp2241517_c0_seq3	4	0.149584	0.000126531	0.407884	0.442308	9.6313e-05
comp2241541_c0_seq2	2	0.00102109	0.968285	0.00173603	0.000875266	0.0280823
comp2241548_c2_seq3	1	0.991897	1.88456e-05	0.00327999	0.00478632	1.73618e-05
comp2241560_c0_seq1	1	0.972882	5.85744e-05	0.0143961	0.0126132	5.02105e-05
gnl_Pdu_trscr_assembly_1_836	5	0.00020763	0.0276151	0.000247103	0.000198288	0.971732
comp2241576_c0_seq2	2	0.00352248	0.754879	0.00555701	0.00336701	0.232675
comp2241582_c0_seq1	1	0.665874	0.00353788	0.0704048	0.255113	0.00507018
comp2241601_c0_seq1	3	0.400168	0.0024528	0.425244	0.170363	0.00177264
comp2241622_c0_seq1	2	0.000228712	0.889735	0.0003527	0.000230943	0.109452
comp2241686_c0_seq2	4	0.309861	9.46426e-05	0.0483004	0.64166	8.39625e-05
comp2241708_c0_seq1	5	0.00122647	0.0322138	0.00125687	0.00115036	0.964153
comp2241717_c1_seq2	3	0.0669985	0.000304411	0.826851	0.105645	0.00020102
comp2241733_c1_seq1	4	0.10643	0.00106204	0.0512624	0.840022	0.00122374
comp2241744_c0_seq2	2	0.00136469	0.826089	0.00201922	0.00123495	0.169292
comp2241799_c0_seq1	1	0.288928	0.0787307	0.128888	0.24747	0.255983
comp2241810_c0_seq1	2	0.00539	0.873116	0.0103989	0.00537744	0.105718
comp2241829_c1_seq1	2	0.0149657	0.819988	0.029662	0.0147627	0.120622
comp2241844_c0_seq2	5	0.0016143	0.218533	0.00205164	0.00148851	0.776312
comp2241847_c0_seq5	2	0.000471333	0.838566	0.000710015	0.000461302	0.159792
comp2241862_c0_seq3	5	0.00114138	0.0465413	0.00133255	0.00122005	0.949765
comp2241866_c1_seq1	4	0.381331	0.00326692	0.0618512	0.548459	0.00509197
comp2241874_c0_seq1	4	0.0057632	4.92978e-05	0.0155838	0.978561	4.23803e-05
comp2241894_c0_seq1	2	0.00128006	0.655993	0.00189073	0.00121065	0.339626
comp2241915_c0_seq2	1	0.989103	2.41012e-05	0.00234085	0.00850681	2.55435e-05
comp2241974_c0_seq1	5	0.00151188	0.184816	0.00188066	0.00140273	0.810388
comp2242002_c0_seq1	5	0.0197293	0.447375	0.0278844	0.0196744	0.485337
comp2242014_c0_seq1	1	0.471677	0.000578281	0.428091	0.0992398	0.000413279
comp2242018_c0_seq1	5	0.00932149	0.119428	0.0101602	0.0104918	0.850598
comp2242039_c0_seq2	2	0.00033831	0.970811	0.000580418	0.00033468	0.0279356
comp2242060_c0_seq1	5	0.000268502	0.0352515	0.000330581	0.000260766	0.963889
comp2242133_c0_seq1	5	0.000500604	0.268995	0.000727428	0.000534781	0.729243
comp2242173_c0_seq1	2	0.0006881	0.908454	0.000998375	0.000601828	0.0892573
comp2242181_c0_seq1	1	0.972707	3.19489e-05	0.0109653	0.0162677	2.8372e-05
comp2242219_c0_seq1	1	0.954839	2.93636e-05	0.0113101	0.0337955	2.63035e-05
comp2242237_c0_seq1	5	0.000917564	0.0143865	0.000858607	0.00087855	0.982959
comp2242253_c0_seq1	5	0.000103863	0.00923347	0.000120718	9.91693e-05	0.990443
comp2242282_c0_seq1	5	0.000338911	0.0169233	0.000402312	0.00037219	0.981963
gnl_Pdu_trscr_assembly_1_7688	4	0.0429857	0.000895005	0.33754	0.617918	0.000660748
comp2242292_c0_seq1	2	0.000409817	0.791343	0.000625354	0.000414891	0.207207
comp2242294_c0_seq2	3	0.012671	0.000129436	0.92192	0.0651984	8.07346e-05
comp2242307_c0_seq1	1	0.989546	6.34375e-06	0.00306464	0.00737746	5.54561e-06
comp2242318_c0_seq1	2	0.000158937	0.991162	0.000313835	0.000170273	0.00819459
comp2242379_c0_seq1	2	0.000971119	0.965167	0.00164109	0.00085098	0.03137
comp2242382_c0_seq1	1	0.989307	2.10351e-05	0.00314866	0.00750237	2.07803e-05
comp2242389_c0_seq1	1	0.990291	3.09647e-05	0.00502473	0.00462581	2.75656e-05
comp2242395_c0_seq1	5	0.00140058	0.0309042	0.00136149	0.00130268	0.965031
comp2242437_c0_seq2	4	0.0560972	2.06948e-05	0.0122288	0.931635	1.85497e-05
comp2242445_c0_seq1	3	0.119803	0.18826	0.501653	0.139704	0.0505798
comp2242456_c0_seq1	2	0.000207674	0.993522	0.000435897	0.00021138	0.00562269
comp2242464_c0_seq3	1	0.994823	7.62126e-06	0.00113077	0.00403146	7.63464e-06
comp2242466_c0_seq1	4	0.02157	3.20931e-05	0.0289418	0.949429	2.67814e-05
comp2242472_c0_seq1	1	0.860501	0.00145164	0.0944245	0.0424319	0.00119068
comp2242477_c0_seq1	2	0.00604727	0.713976	0.00884569	0.00553552	0.265596
comp2242487_c0_seq1	2	0.000495119	0.98366	0.000893818	0.00044811	0.0145027
comp2242509_c0_seq1	5	0.0457513	0.0973239	0.0361991	0.0573173	0.763408
comp2242516_c0_seq1	1	0.981629	5.40144e-05	0.0107099	0.00756148	4.57148e-05
comp2242539_c0_seq1	4	0.120576	0.000175498	0.137977	0.741127	0.000145098
comp2242540_c0_seq1	5	0.0086107	0.150847	0.00960278	0.00898507	0.821954
comp2242548_c0_seq1	1	0.687794	0.00525446	0.0857282	0.214395	0.00682876
comp2242564_c0_seq2	5	0.000137371	0.00881714	0.000164716	0.00014792	0.990733
comp2242569_c0_seq3	2	0.00375263	0.922056	0.00715958	0.00373439	0.0632973
comp2242578_c0_seq2	2	0.000483269	0.921639	0.000774883	0.000464361	0.076639
comp2242590_c0_seq1	5	0.000871202	0.125831	0.00110171	0.000852557	0.871344
gnl_Pdu_trscr_assembly_1_861	1	0.722384	0.000119117	0.0232094	0.254166	0.000121447
comp2242650_c0_seq1	2	0.00385935	0.639616	0.00578324	0.00384762	0.346894
comp2242654_c0_seq1	5	0.000461939	0.00956111	0.000449689	0.000441791	0.989085
comp2242682_c0_seq1	5	0.00110891	0.158846	0.00138072	0.00100403	0.83766
comp2242708_c0_seq1	2	0.00340895	0.952592	0.00861157	0.00372387	0.0316632
comp2242712_c0_seq1	4	0.0077309	8.19952e-05	0.014608	0.977504	7.51957e-05
comp2242747_c0_seq1	5	0.00255193	0.05769	0.00297289	0.0028925	0.933893
comp2242780_c0_seq2	1	0.99034	1.00808e-05	0.00240882	0.00723199	9.46559e-06
comp2242781_c0_seq1	4	0.005844	3.9494e-05	0.00728848	0.986791	3.71431e-05
comp2242793_c0_seq2	2	0.000261286	0.925857	0.000422141	0.000264679	0.0731949
comp2242807_c1_seq1	5	0.0269793	0.152116	0.0233372	0.0252469	0.772321
comp2242808_c0_seq3	5	0.000793571	0.0291812	0.000853134	0.000745185	0.968427
comp2242815_c0_seq1	5	0.00437168	0.156785	0.00503861	0.00445325	0.829351
comp2242820_c0_seq1	4	0.00183159	4.09598e-06	0.000958843	0.997202	3.97144e-06
gnl_Pdu_trscr_assembly_1_15245	2	0.000563383	0.980784	0.00117858	0.000626759	0.0168473
comp2242834_c0_seq1	1	0.904898	7.52661e-05	0.0640898	0.0308783	5.88552e-05
comp2242854_c1_seq5	2	0.000768049	0.679344	0.00107831	0.000700355	0.318109
comp2242864_c0_seq1	5	0.0139795	0.453564	0.0183404	0.0130072	0.501109
comp2242888_c0_seq1	2	0.00250818	0.960579	0.00487832	0.0021748	0.0298598
comp2242933_c0_seq1	4	0.0103569	6.13645e-06	0.0031164	0.986515	5.59448e-06
gnl_Pdu_trscr_assembly_1_15000	4	0.293184	0.000178026	0.128185	0.578308	0.000145991
comp2242968_c0_seq2	5	0.00608449	0.327562	0.0074508	0.00599497	0.652908
comp2242981_c0_seq1	5	0.000574078	0.0384469	0.000701063	0.000590675	0.959687
comp2242993_c0_seq2	4	0.0131309	1.17594e-05	0.00795	0.978897	1.02294e-05
comp2243002_c0_seq1	4	0.0795975	0.000545169	0.0259018	0.893262	0.000693939
comp2243025_c0_seq2	5	0.000433364	0.0545376	0.000543897	0.000446694	0.944038
comp2243080_c0_seq1	4	0.11109	0.00121672	0.0604824	0.825792	0.00141895
comp2243104_c0_seq1	5	0.000335452	0.0276466	0.000392613	0.000326392	0.971299
comp2243123_c0_seq1	5	0.0598427	0.105522	0.0390459	0.0552861	0.740303
comp2243124_c0_seq1	5	0.0697884	0.151587	0.0539786	0.0691548	0.655491
gnl_Pdu_trscr_assembly_1_4151	4	0.119406	0.000924643	0.382548	0.496386	0.000735444
comp2243141_c0_seq1	4	0.290788	0.0575253	0.148022	0.35666	0.147005
comp2243143_c0_seq1	4	0.00385506	2.89222e-06	0.0013063	0.994833	2.66752e-06
comp2243193_c0_seq1	4	0.0895788	0.00127132	0.452318	0.455903	0.00092893
comp2243209_c0_seq1	5	0.00112341	0.0494288	0.0012569	0.00106567	0.947125
comp2243214_c0_seq2	2	0.000933316	0.962893	0.00174774	0.000929126	0.033497
gnl_Pdu_trscr_assembly_1_11072	2	0.000283864	0.992223	0.00062589	0.000305498	0.00656204
comp2243227_c0_seq1	5	6.84086e-05	0.00771183	7.97118e-05	6.54798e-05	0.992075
comp2243232_c0_seq1	2	0.000553225	0.936533	0.000892417	0.000542984	0.0614788
comp2243264_c0_seq1	2	0.011998	0.755014	0.022634	0.0126043	0.19775
comp2243270_c0_seq1	5	0.000422955	0.0289582	0.000528417	0.000462008	0.969628
comp2243273_c0_seq1	1	0.980277	3.09123e-05	0.0077055	0.0119584	2.78998e-05
comp2243275_c0_seq1	4	0.0706054	0.000137207	0.0401965	0.888938	0.00012276
comp2243278_c0_seq2	1	0.899096	0.000367854	0.0459184	0.0542905	0.000326982
comp2243303_c0_seq1	2	0.00279461	0.607069	0.00398096	0.0027096	0.383445
comp2243318_c0_seq1	1	0.613374	5.42156e-05	0.0153735	0.371145	5.32316e-05
comp2243320_c0_seq1	4	0.01003	7.01622e-05	0.00702756	0.982798	7.43826e-05
comp2243329_c0_seq1	5	0.0479236	0.0860705	0.0321948	0.0493592	0.784452
comp2243345_c0_seq1	2	0.00913096	0.894428	0.0204996	0.00921287	0.0667282
comp2243368_c0_seq4	5	0.000163697	0.0233787	0.000203919	0.000165351	0.976088
comp2243418_c0_seq1	2	0.00478466	0.786726	0.00794793	0.00479247	0.195749
comp2243436_c0_seq1	4	0.0569449	0.00029732	0.234246	0.708277	0.000234783
comp2243447_c0_seq1	2	0.00423276	0.556085	0.00649839	0.00453326	0.42865
comp2243473_c0_seq1	2	0.0111437	0.860835	0.0202927	0.00989306	0.0978355
comp2243479_c0_seq1	4	0.0540556	0.00351949	0.137906	0.801231	0.00328733
comp2243492_c1_seq1	2	0.00203547	0.876412	0.00321996	0.00201244	0.11632
comp2243519_c0_seq1	1	0.96409	1.50553e-05	0.00492127	0.0309595	1.41085e-05
comp2243528_c0_seq1	1	0.653319	0.000127214	0.0515927	0.294847	0.000114119
comp2243549_c0_seq5	2	0.000290919	0.990781	0.00056688	0.000284166	0.00807677
comp2243576_c0_seq2	1	0.793915	0.000646142	0.0353267	0.169349	0.000763254
comp2243606_c0_seq1	1	0.997903	2.54611e-06	0.000462144	0.00162977	2.49492e-06
comp2243608_c0_seq1	5	0.00246783	0.203058	0.0029479	0.00228557	0.789241
comp2243662_c0_seq1	5	0.00314668	0.0531147	0.00318379	0.00314211	0.937413
comp2243674_c0_seq2	5	0.00381228	0.0664672	0.00378492	0.00355767	0.922378
comp2243785_c0_seq1	2	0.00144781	0.961592	0.00299091	0.00154791	0.032421
comp2243810_c0_seq2	1	0.994841	2.90762e-06	0.00100304	0.00415031	2.69112e-06
comp2243818_c0_seq2	3	0.0903963	0.000458711	0.684199	0.224632	0.000314491
comp2243820_c0_seq1	2	0.00211651	0.961858	0.00436051	0.00203137	0.0296341
comp2243881_c0_seq1	5	0.000385531	0.316759	0.000517525	0.000358229	0.68198
comp2243915_c0_seq1	2	0.000789965	0.944137	0.0013544	0.000772218	0.0529466
comp2243922_c0_seq1	2	0.000385215	0.98924	0.00081416	0.000383617	0.0091767
comp2243923_c0_seq1	5	0.00384408	0.223064	0.00566967	0.00486405	0.762559
comp2243948_c0_seq4	1	0.99651	3.08794e-06	0.00110031	0.00238395	2.7712e-06
comp2243954_c1_seq1	1	0.710267	0.00149409	0.225837	0.0612818	0.00112007
comp2243959_c0_seq1	2	0.000773977	0.868101	0.00137439	0.000935306	0.128816
comp2243962_c0_seq1	5	0.00179283	0.0446767	0.00179008	0.0016225	0.950118
comp2243982_c0_seq2	2	0.000750536	0.929788	0.00122635	0.000725751	0.0675092
comp2243988_c0_seq1	5	0.00230952	0.0848733	0.00273611	0.0023437	0.907737
comp2244052_c0_seq1	4	0.0212521	0.000208103	0.189393	0.788989	0.000157457
comp2244056_c0_seq2	5	0.00200994	0.081954	0.00219328	0.00190055	0.911942
comp2244057_c0_seq1	4	0.0255169	0.000585637	0.0887039	0.884696	0.000497168
comp2244058_c0_seq1	2	0.00126315	0.528315	0.00178546	0.00124251	0.467394
comp2244063_c0_seq1	5	0.00116636	0.23367	0.00152529	0.00117499	0.762463
comp2244071_c0_seq1	2	0.000681973	0.97635	0.00136552	0.000688945	0.0209137
comp2244088_c0_seq2	5	0.000262245	0.0703246	0.00035752	0.00027579	0.92878
comp2244128_c0_seq1	1	0.90109	9.46908e-05	0.0122121	0.0865021	0.000101359
comp2244130_c0_seq1	5	8.66789e-05	0.00924087	0.000101238	8.17009e-05	0.99049
comp2244138_c0_seq2	5	0.000307219	0.0345544	0.000389781	0.00032612	0.964422
comp2244162_c0_seq3	1	0.623379	0.000115901	0.0523647	0.324038	0.000102822
comp2244171_c0_seq1	1	0.767182	0.000322774	0.0630309	0.169162	0.000301892
comp2244199_c0_seq1	5	8.55653e-05	0.00959929	0.000100114	8.10239e-05	0.990134
comp2244207_c0_seq1	1	0.956288	0.000418254	0.0232227	0.0196727	0.00039823
comp2244244_c0_seq1	5	0.00301301	0.229448	0.00357229	0.00265766	0.761309
comp2244248_c0_seq1	5	0.0323287	0.13807	0.0358304	0.0491837	0.744587
comp2244297_c0_seq1	1	0.945156	0.000577338	0.0302847	0.0234416	0.000540279
comp2244327_c0_seq1	5	0.00202825	0.030534	0.00214201	0.00236951	0.962926
comp2244353_c0_seq1	2	0.00317547	0.921979	0.00620966	0.0031646	0.0654713
comp2244353_c1_seq1	2	0.000650724	0.987229	0.00142151	0.000616842	0.0100819
comp2244422_c0_seq2	2	0.00634039	0.598075	0.0100036	0.00651403	0.379067
comp2244489_c0_seq1	1	0.713786	0.00024628	0.0189531	0.266726	0.00028825
comp2244546_c0_seq1	1	0.949659	7.39213e-05	0.00694726	0.0432383	8.19664e-05
comp2244551_c0_seq2	2	0.0060434	0.705064	0.00881907	0.00558243	0.274491
comp2244555_c0_seq2	5	0.00426825	0.338386	0.0058017	0.00420693	0.647337
comp2244572_c0_seq1	2	0.00103524	0.874179	0.0016968	0.00102967	0.122059
comp2244580_c0_seq1	1	0.479979	0.0422463	0.248824	0.182311	0.0466397
comp2244586_c0_seq1	3	0.208895	0.000831559	0.476338	0.313317	0.000618854
comp2244589_c0_seq2	4	0.00225035	1.27493e-05	0.00368945	0.994036	1.14844e-05
comp2244592_c0_seq2	2	3.70871e-05	0.997036	6.64569e-05	3.69421e-05	0.00282336
comp2244595_c0_seq1	5	0.00172089	0.0961322	0.00206592	0.00167442	0.898407
comp2244623_c0_seq1	2	0.00025526	0.984514	0.000446361	0.000250552	0.0145338
comp2244716_c0_seq1	5	0.00105939	0.0285347	0.0012033	0.00120768	0.967995
comp2244718_c0_seq4	5	0.000251004	0.0172973	0.000287693	0.00024816	0.981916
comp2244773_c1_seq1	2	0.001934	0.77572	0.00293688	0.00187485	0.217534
comp2244784_c0_seq1	1	0.564971	0.0132114	0.104081	0.293812	0.0239249
comp2244840_c0_seq1	2	0.00655476	0.756003	0.0119943	0.00703109	0.218416
comp2244843_c0_seq4	2	0.0689699	0.548651	0.121085	0.068553	0.192741
comp2244884_c0_seq1	4	0.0522544	0.000284405	0.0890661	0.858144	0.000251444
comp2244889_c0_seq1	5	0.000271616	0.0340058	0.00032933	0.000259577	0.965134
comp2244907_c1_seq1	5	0.00770052	0.425899	0.00930274	0.00689521	0.550203
comp2244915_c0_seq2	5	0.000622861	0.0326901	0.000770335	0.000691747	0.965225
comp2244954_c0_seq2	4	0.310357	0.00017458	0.0172407	0.672029	0.000199504
comp2244959_c0_seq2	5	0.000450427	0.0224944	0.000494264	0.000420423	0.97614
comp2244969_c0_seq2	2	0.000311202	0.987053	0.000544157	0.000277222	0.0118146
comp2244978_c1_seq1	2	8.96672e-05	0.9714	0.000140339	8.78352e-05	0.028282
comp2244979_c0_seq3	1	0.62923	0.000126563	0.021157	0.349357	0.000129593
comp2245003_c0_seq1	4	0.00802638	7.51744e-05	0.0149254	0.976905	6.82186e-05
comp2245011_c1_seq2	2	0.00314428	0.924063	0.00603612	0.00312487	0.0636313
comp2245017_c0_seq1	4	0.120436	0.139501	0.286843	0.327333	0.125887
comp2245053_c0_seq1	2	8.20706e-05	0.996565	0.000158213	7.86039e-05	0.00311653
comp2245060_c0_seq2	2	0.0527452	0.458272	0.0624675	0.0416864	0.384829
comp2245073_c0_seq1	5	0.00545255	0.184327	0.00780877	0.0069539	0.795458
comp2245081_c0_seq1	4	0.252101	0.00145127	0.0484393	0.696034	0.00197435
comp2245096_c0_seq1	2	0.000655225	0.955407	0.00118851	0.000666971	0.0420821
comp2245157_c0_seq2	2	0.000892835	0.710508	0.00128971	0.00085144	0.286458
comp2245160_c0_seq2	2	0.000827655	0.971309	0.00161831	0.000855439	0.0253898
comp2245167_c0_seq2	2	0.000576855	0.980679	0.00114836	0.000571438	0.0170244
comp2245194_c0_seq1	5	0.00160048	0.355968	0.00198758	0.00143634	0.639007
comp2245203_c0_seq1	1	0.997404	1.7839e-06	0.000566798	0.00202584	1.65479e-06
comp2245223_c0_seq1	4	0.0696701	6.0069e-05	0.0237756	0.90644	5.38803e-05
comp2245244_c0_seq1	5	0.00703539	0.0958667	0.00690095	0.00691208	0.883285
comp2245246_c0_seq1	5	0.00745718	0.0803001	0.00739805	0.00728135	0.897563
comp2245256_c0_seq2	5	0.00253171	0.0605608	0.00260993	0.00239315	0.931904
comp2245319_c0_seq1	2	0.00732936	0.890554	0.0168576	0.00811139	0.0771473
comp2245322_c0_seq1	5	0.000907135	0.169572	0.00116331	0.000850938	0.827507
comp2245323_c0_seq2	1	0.958535	4.81363e-05	0.0290465	0.0123329	3.76529e-05
comp2245323_c1_seq1	1	0.917563	3.98783e-05	0.0471329	0.0352327	3.17913e-05
comp2245332_c0_seq1	4	0.204513	0.000731423	0.0318587	0.76195	0.000947466
comp2245333_c0_seq1	5	0.00359785	0.0359539	0.00336717	0.00357946	0.953502
comp2245335_c0_seq1	2	0.000850756	0.982281	0.00188001	0.000856727	0.0141315
comp2245338_c0_seq1	5	0.00182487	0.18877	0.00217235	0.00170687	0.805526
comp2245343_c0_seq1	5	0.000133332	0.00514066	0.000144543	0.000137639	0.994444
comp2245355_c0_seq4	4	0.0584117	0.000222138	0.467373	0.473831	0.000161908
comp2245360_c2_seq1	4	0.00155945	4.67648e-06	0.00141904	0.997013	4.31739e-06
comp2245366_c0_seq2	2	0.00140434	0.967892	0.00295528	0.00140785	0.0263403
comp2245379_c0_seq2	2	0.000531544	0.833598	0.000807405	0.000527679	0.164535
comp2245391_c0_seq1	2	0.00121779	0.897489	0.00193778	0.00121536	0.0981402
comp2245392_c0_seq1	2	0.00363479	0.776798	0.00642324	0.00414739	0.208996
comp2245426_c0_seq2	3	0.143284	0.0236714	0.747684	0.0768671	0.00849393
comp2245442_c0_seq1	4	0.00339475	3.78849e-06	0.00159861	0.994999	3.48426e-06
comp2245484_c0_seq2	2	0.000215013	0.983745	0.000390326	0.000213302	0.0154367
comp2245492_c0_seq2	2	4.98199e-05	0.996588	9.66545e-05	5.2451e-05	0.00321283
comp2245511_c0_seq1	5	0.00207135	0.0452388	0.00237506	0.00242067	0.947894
comp2245540_c0_seq1	5	0.0163693	0.0586749	0.012464	0.015655	0.896837
comp2245547_c0_seq2	5	0.000400794	0.0312185	0.00045882	0.000381322	0.967541
comp2245555_c0_seq2	5	0.00417762	0.0320035	0.00366329	0.0042695	0.955886
comp2245564_c0_seq1	2	0.000819644	0.968167	0.00160589	0.000883146	0.0285242
comp2245570_c0_seq1	1	0.972866	0.000129557	0.0142663	0.0126213	0.000116715
comp2245581_c0_seq1	2	0.000316678	0.81118	0.000474854	0.000308821	0.18772
comp2245603_c0_seq1	5	0.0017132	0.109208	0.00216475	0.00185437	0.88506
comp2245616_c0_seq2	4	0.00261164	2.03331e-06	0.00081994	0.996564	1.90607e-06
comp2245625_c0_seq3	1	0.956648	3.93e-05	0.00960228	0.0336741	3.63993e-05
comp2245628_c0_seq2	4	0.103989	7.68061e-05	0.0428704	0.852997	6.70576e-05
comp2245652_c0_seq1	5	0.0279783	0.108741	0.0223691	0.0272967	0.813615
comp2245655_c0_seq1	2	0.00344159	0.939767	0.00720141	0.00337561	0.0462143
comp2245660_c0_seq4	2	0.000916906	0.961517	0.00158908	0.000825745	0.0351516
comp2245687_c1_seq1	3	0.0896313	0.0443793	0.777488	0.0759823	0.0125188
comp2245694_c0_seq1	2	0.00250545	0.913405	0.00444168	0.00240533	0.0772429
comp2245713_c0_seq1	2	0.00117086	0.980023	0.00255455	0.00111545	0.0151364
comp2245721_c0_seq1	2	0.00401048	0.540218	0.00582995	0.00388409	0.446058
comp2245730_c0_seq1	4	0.00504993	7.65484e-06	0.00304025	0.991895	7.14229e-06
comp2245738_c0_seq2	1	0.747281	8.88449e-05	0.128012	0.124547	7.06804e-05
comp2245756_c0_seq1	2	0.0124558	0.604066	0.0179721	0.0110191	0.354487
comp2245763_c0_seq1	5	0.00014104	0.0253304	0.000175575	0.000137495	0.974215
comp2245767_c0_seq1	1	0.983499	1.15273e-05	0.00442837	0.0120505	1.03637e-05
comp2245787_c0_seq1	1	0.937587	4.51682e-05	0.0245234	0.0378061	3.803e-05
comp2245788_c0_seq1	2	0.00273484	0.756356	0.00361135	0.00219725	0.235101
comp2245794_c0_seq1	1	0.823515	0.000112277	0.0924215	0.0838612	8.99884e-05
comp2245797_c0_seq4	2	0.00115788	0.814056	0.00178449	0.00108531	0.181916
comp2245798_c0_seq1	1	0.989014	4.32492e-05	0.00586651	0.00503704	3.87985e-05
comp2245808_c0_seq1	5	0.000916992	0.0242389	0.00106664	0.00109251	0.972685
comp2245811_c0_seq1	5	0.000380497	0.0486966	0.000481061	0.000384133	0.950058
comp2245845_c0_seq1	4	0.422794	0.000167501	0.0210775	0.555779	0.000182226
comp2245847_c0_seq3	2	2.53015e-05	0.998553	4.71882e-05	2.48056e-05	0.00134966
comp2245862_c0_seq1	5	0.000295732	0.0108948	0.000330518	0.000311979	0.988167
comp2245865_c0_seq1	1	0.915914	8.16664e-05	0.00914267	0.0747723	8.89302e-05
comp2245875_c0_seq2	2	0.000193691	0.94561	0.000298251	0.000181776	0.0537166
gnl_Pdu_trscr_assembly_1_87462	5	0.000372088	0.00945745	0.000372822	0.000371277	0.989426
comp2245928_c0_seq1	5	0.00432724	0.1483	0.00484848	0.00433631	0.838188
gnl_Pdu_trscr_assembly_1_13757	2	0.000188389	0.984983	0.000342296	0.000200801	0.0142858
comp2245942_c0_seq1	5	0.00117291	0.0218105	0.00109162	0.00107806	0.974847
comp2245947_c0_seq1	2	0.0109986	0.901298	0.0338699	0.0115901	0.0422433
comp2245950_c0_seq1	4	0.0509249	0.000580939	0.0266293	0.921156	0.000709068
comp2245955_c0_seq1	5	0.000185731	0.0079106	0.000211984	0.000200224	0.991491
comp2245969_c0_seq1	5	0.00443216	0.0318764	0.00357808	0.00399961	0.956114
comp2245975_c0_seq1	5	0.00219874	0.153484	0.00276919	0.0021707	0.839377
comp2245998_c0_seq3	5	0.00103947	0.0187951	0.00108508	0.001158	0.977922
comp2246011_c0_seq1	1	0.715937	0.00410053	0.187576	0.089121	0.00326527
comp2246014_c0_seq3	3	0.116375	0.204514	0.330632	0.242754	0.105724
comp2246028_c0_seq1	1	0.896039	0.000597301	0.0698426	0.0330429	0.000478472
comp2246057_c0_seq1	3	0.244515	0.00264414	0.561684	0.189321	0.00183548
comp2246062_c0_seq1	2	0.00668397	0.887674	0.0129535	0.00688011	0.0858084
comp2246063_c0_seq1	5	0.00131928	0.0791751	0.0017211	0.00161218	0.916172
comp2246072_c0_seq1	5	0.0215495	0.140959	0.0219748	0.0229487	0.792568
comp2246085_c0_seq1	5	0.0220719	0.0925813	0.0190423	0.022554	0.843751
comp2246094_c0_seq1	4	0.115055	4.70339e-05	0.00916354	0.875686	4.84106e-05
comp2246100_c0_seq3	5	0.0185943	0.157247	0.0170989	0.0164547	0.790605
comp2246101_c1_seq1	2	0.000744819	0.961325	0.00140638	0.000775513	0.0357487
comp2246102_c0_seq1	2	0.00111766	0.93375	0.00200544	0.0011351	0.0619916
comp2246130_c0_seq1	2	0.00367208	0.921337	0.00703985	0.00375878	0.0641927
comp2246133_c0_seq1	5	0.00555415	0.335977	0.00690896	0.00536508	0.646195
comp2246143_c0_seq1	1	0.956066	0.000189216	0.018811	0.0247551	0.000178208
comp2246174_c0_seq1	5	0.00961827	0.0713457	0.00918247	0.0100836	0.89977
comp2246178_c0_seq1	5	0.148948	0.132094	0.101063	0.141991	0.475904
comp2246185_c0_seq2	3	0.0738957	0.000293324	0.854953	0.0706686	0.00018928
comp2246196_c0_seq1	4	0.0210657	0.000373292	0.0382717	0.939936	0.000353575
comp2246209_c0_seq3	5	0.0140644	0.0676145	0.0102908	0.0115566	0.896474
comp2246233_c0_seq2	5	0.000753657	0.2049	0.000978572	0.000713645	0.792654
comp2246244_c0_seq1	4	0.0999309	2.88095e-05	0.0190012	0.881013	2.55978e-05
comp2246254_c0_seq1	2	0.00242441	0.949338	0.00481307	0.0023735	0.041051
comp2246287_c0_seq3	4	0.0325038	1.35204e-05	0.00452612	0.962944	1.30632e-05
comp2246288_c0_seq1	2	0.000557817	0.80801	0.000782136	0.000508703	0.190141
comp2246299_c0_seq1	1	0.999321	1.33067e-06	0.000277491	0.000399329	1.21587e-06
comp2246330_c0_seq1	5	0.00515202	0.16747	0.00596829	0.00483608	0.816574
comp2246345_c0_seq1	1	0.774052	0.000846541	0.120539	0.10381	0.000752945
comp2246406_c0_seq1	2	0.0014132	0.92533	0.00269367	0.00152895	0.0690343
comp2246407_c0_seq8	1	0.724874	0.00276131	0.113678	0.1559	0.00278724
comp2246430_c0_seq1	5	0.154017	0.184202	0.159377	0.16873	0.333674
comp2246432_c0_seq1	5	0.000878008	0.0215972	0.000901936	0.000848357	0.975775
comp2246434_c0_seq3	2	0.000118079	0.965798	0.000193833	0.000120657	0.0337694
comp2246451_c0_seq1	5	0.00423927	0.034056	0.00364167	0.00424984	0.953813
comp2246453_c0_seq1	2	0.000470446	0.919531	0.000795073	0.000485913	0.0787179
comp2246466_c0_seq1	4	0.254374	0.0683658	0.161929	0.350822	0.16451
comp2246491_c0_seq2	5	0.00104628	0.189604	0.00139686	0.00106353	0.806889
comp2246503_c0_seq1	1	0.928997	0.000144064	0.0361202	0.0346161	0.000122718
comp2246519_c0_seq2	2	0.00190222	0.735271	0.00269869	0.0017851	0.258343
comp2246565_c0_seq1	5	0.000477971	0.318839	0.000630309	0.000446313	0.679607
comp2246570_c0_seq1	4	0.0226835	6.32821e-05	0.00900958	0.968178	6.5833e-05
comp2246597_c0_seq1	5	0.0306172	0.151256	0.0271013	0.0301082	0.760917
comp2246605_c0_seq1	5	0.000558456	0.0174859	0.00057491	0.000549039	0.980832
comp2246609_c0_seq1	2	0.00116703	0.73207	0.0017015	0.00113377	0.263928
comp2246624_c0_seq1	5	0.000624423	0.0136974	0.000589603	0.000550873	0.984538
comp2246633_c0_seq1	5	0.00417655	0.0317639	0.00366949	0.00427175	0.956118
comp2246635_c0_seq1	2	0.00573246	0.80592	0.0103428	0.00587113	0.172134
comp2246640_c0_seq1	3	0.175139	0.0057865	0.612874	0.202262	0.00393844
comp2246646_c0_seq1	5	0.00947698	0.0662528	0.00959401	0.0122557	0.90242
comp2246658_c0_seq3	2	0.00352062	0.815676	0.00580266	0.00356806	0.171433
comp2246670_c0_seq1	1	0.991725	7.81775e-06	0.00261561	0.00564411	7.01351e-06
comp2246681_c1_seq1	2	0.144134	0.358437	0.214468	0.093627	0.189334
comp2246689_c0_seq2	5	0.00103741	0.038317	0.00104632	0.000903807	0.958695
comp2246734_c0_seq1	5	0.000599781	0.0243192	0.000666726	0.000609036	0.973805
comp2246744_c0_seq1	4	0.0640383	0.00107591	0.339037	0.595042	0.00080721
gnl_Pdu_trscr_assembly_1_1924	1	0.640661	0.0123956	0.182527	0.152558	0.0118584
comp2246784_c0_seq1	1	0.980524	1.19625e-05	0.00396671	0.0154867	1.10743e-05
comp2246787_c0_seq1	2	0.000775434	0.671688	0.00104223	0.000671177	0.325823
comp2246788_c0_seq4	4	0.0164594	8.45441e-05	0.0464849	0.936901	7.01377e-05
comp2246799_c0_seq2	4	0.00920881	2.89266e-05	0.0251898	0.965549	2.34733e-05
comp2246807_c0_seq1	1	0.500227	5.87649e-05	0.0379794	0.461682	5.19569e-05
comp2246811_c0_seq5	4	0.00288895	1.45522e-05	0.00537656	0.991707	1.27349e-05
comp2246829_c0_seq1	5	0.0127899	0.0809662	0.010704	0.0123353	0.883205
comp2246831_c0_seq2	5	0.0043445	0.125659	0.0043809	0.00366443	0.861951
comp2246840_c0_seq1	5	0.000335043	0.00774422	0.000341373	0.000346963	0.991232
comp2246862_c0_seq1	2	4.68477e-05	0.995839	8.34946e-05	4.61141e-05	0.00398504
comp2246879_c0_seq1	2	0.00241227	0.865372	0.00398542	0.00235403	0.125877
comp2246889_c0_seq8	3	0.235857	0.000258454	0.716495	0.047215	0.000175079
comp2246890_c0_seq1	2	0.00417929	0.871618	0.00829754	0.00473611	0.111169
comp2246896_c0_seq1	2	0.000571477	0.985556	0.00122725	0.000573242	0.0120719
comp2246905_c1_seq1	1	0.62521	0.000534552	0.0285354	0.345049	0.000671275
comp2246930_c0_seq1	5	0.00264083	0.0263429	0.00228847	0.00241868	0.966309
comp2246940_c0_seq1	5	0.000967884	0.0298445	0.0010461	0.00100046	0.967141
comp2246956_c0_seq1	2	0.0010138	0.634995	0.00158859	0.00107893	0.361323
comp2246959_c0_seq1	5	0.00221056	0.0543139	0.00260945	0.00262067	0.938245
comp2246960_c0_seq1	4	0.291064	0.00343202	0.0744159	0.625981	0.00510704
comp2246980_c0_seq1	2	0.00851341	0.617494	0.0113617	0.0076233	0.355007
comp2246985_c0_seq1	5	0.000104137	0.00516076	0.000111711	0.000101087	0.994522
comp2246986_c1_seq2	5	0.00171978	0.0728554	0.00191155	0.00156169	0.921952
comp2246994_c0_seq1	2	0.00284792	0.643568	0.00402185	0.00276783	0.346794
comp2246998_c0_seq1	4	0.0179068	0.000158509	0.0392377	0.942554	0.000142986
comp2246999_c0_seq1	1	0.763792	0.000399729	0.192903	0.0426125	0.000292637
gnl_Pdu_trscr_assembly_1_263974	4	0.121795	9.47014e-05	0.117872	0.760159	7.84447e-05
comp2247021_c0_seq1	2	0.0115127	0.817516	0.0285782	0.0150148	0.127378
comp2247023_c0_seq1	5	0.0376337	0.181939	0.0337785	0.0359973	0.710652
comp2247049_c0_seq3	5	0.0094863	0.333983	0.0115114	0.00862135	0.636398
comp2247091_c1_seq1	2	0.00120085	0.959591	0.00213991	0.00116307	0.0359053
comp2247098_c0_seq1	5	0.00271618	0.134781	0.00312775	0.00268721	0.856688
comp2247108_c0_seq2	1	0.992754	2.67921e-05	0.00361117	0.0035834	2.43953e-05
comp2247142_c0_seq3	5	0.00114315	0.134337	0.00140305	0.00111181	0.862005
gnl_Pdu_trscr_assembly_1_16408	4	0.150757	0.0001895	0.0332522	0.815609	0.000191815
comp2247179_c0_seq1	2	0.00206681	0.590742	0.00295101	0.0020349	0.402206
comp2247192_c0_seq2	4	0.266303	0.0128071	0.136525	0.564362	0.0200031
gnl_Pdu_trscr_assembly_1_87370	2	0.00284985	0.779155	0.00419772	0.00249217	0.211305
comp2247248_c0_seq1	5	0.00103546	0.0956831	0.00126694	0.00101294	0.901002
comp2247249_c0_seq1	5	0.00160287	0.182958	0.00206833	0.00152593	0.811845
comp2247254_c0_seq1	1	0.99854	1.73653e-06	0.000508876	0.000947742	1.57136e-06
comp2247289_c0_seq5	4	0.155768	0.00435435	0.230919	0.604981	0.00397849
comp2247293_c0_seq1	1	0.6428	0.000828484	0.192975	0.162724	0.000672107
comp2247303_c0_seq1	2	6.00776e-05	0.997007	0.000106519	5.40895e-05	0.00277225
comp2247304_c0_seq1	3	0.0109208	0.000511929	0.966433	0.0218874	0.000246882
comp2247307_c0_seq1	5	0.0729885	0.108239	0.048947	0.0704993	0.699326
comp2247313_c0_seq1	2	0.00394407	0.92249	0.00777492	0.00383092	0.0619599
comp2247345_c0_seq1	5	0.00107038	0.0199556	0.00106763	0.00110025	0.976806
comp2247349_c0_seq1	2	0.000696789	0.952496	0.00112847	0.000661931	0.0450172
comp2247380_c0_seq1	2	0.0314986	0.710034	0.0835789	0.0381074	0.136781
comp2247385_c0_seq1	4	0.0367618	0.000355821	0.0341277	0.928399	0.000355597
comp2247387_c0_seq3	2	0.000847972	0.51909	0.00133719	0.000968381	0.477756
gnl_Pdu_trscr_assembly_1_10182	1	0.436623	0.00797537	0.138014	0.406272	0.0111159
comp2247421_c0_seq10	5	0.000486405	0.090937	0.00065945	0.000530071	0.907387
comp2247422_c0_seq1	1	0.974352	8.78625e-05	0.0131206	0.0123624	7.75927e-05
comp2247466_c0_seq1	2	0.00177782	0.946012	0.00361352	0.00188004	0.0467169
comp2247468_c0_seq1	2	0.00189811	0.825155	0.0028013	0.00179259	0.168353
comp2247471_c0_seq1	4	0.276683	0.000117933	0.022936	0.700144	0.000119397
comp2247474_c0_seq3	2	0.000288852	0.991343	0.000579055	0.000281185	0.00750818
comp2247483_c0_seq2	5	0.00119496	0.188425	0.0017449	0.00137406	0.807261
comp2247498_c1_seq4	1	0.965325	2.23367e-05	0.0109193	0.0237141	1.97208e-05
comp2247533_c0_seq1	5	0.00245812	0.065211	0.00296674	0.00293762	0.926426
comp2247536_c0_seq1	1	0.987201	7.08771e-06	0.00259755	0.0101875	6.46998e-06
gnl_Pdu_trscr_assembly_1_89023	4	0.0054752	2.06224e-05	0.00344872	0.991034	2.10311e-05
comp2247574_c0_seq2	4	0.03918	7.67841e-05	0.0169798	0.94369	7.30535e-05
comp2247618_c0_seq1	4	0.143049	0.000165657	0.0252189	0.831399	0.000166897
comp2247661_c0_seq2	2	0.00464212	0.801301	0.00697595	0.00437775	0.182704
comp2247680_c0_seq1	2	0.00511922	0.513246	0.00736157	0.00551613	0.468757
comp2247684_c0_seq1	2	0.00760669	0.609211	0.0106207	0.00723106	0.36533
comp2247687_c0_seq1	4	0.131222	5.0995e-05	0.0166583	0.85202	4.82285e-05
comp2247737_c0_seq1	2	0.00343731	0.919291	0.00602024	0.00289671	0.0683544
comp2247744_c0_seq2	5	0.0165763	0.0592668	0.0124492	0.0164045	0.895303
comp2247753_c0_seq1	2	0.00385415	0.868032	0.00698293	0.00407912	0.117052
comp2247754_c0_seq1	2	0.000884005	0.852626	0.00154344	0.00100492	0.143941
comp2247754_c1_seq1	5	0.00096012	0.0276825	0.0010375	0.000954023	0.969366
comp2247779_c0_seq5	4	0.0189095	4.12183e-05	0.00772949	0.973279	4.07385e-05
comp2247821_c0_seq5	2	0.00155735	0.932167	0.00307929	0.00172915	0.0614669
comp2247825_c0_seq1	2	5.28048e-05	0.993469	9.31978e-05	5.46666e-05	0.00633018
comp2247858_c0_seq1	5	0.00304849	0.316033	0.00480853	0.0038365	0.672273
comp2247866_c0_seq2	1	0.909165	0.00109064	0.0519265	0.036833	0.000985199
comp2247873_c0_seq2	5	0.00180661	0.116776	0.0022339	0.00174759	0.877436
comp2247881_c0_seq1	5	0.000174659	0.0328667	0.000219053	0.000168521	0.966571
comp2247887_c0_seq4	5	0.0102138	0.0690417	0.00861187	0.00956194	0.902571
comp2247912_c0_seq1	5	0.00089176	0.0489111	0.000986738	0.000829417	0.948381
comp2247930_c0_seq1	5	0.00299517	0.0417551	0.0030555	0.00316782	0.949026
comp2247948_c0_seq1	2	0.0100434	0.641811	0.0169912	0.0110135	0.32014
comp2247957_c0_seq2	2	0.00289742	0.955468	0.00578411	0.00261183	0.033239
comp2247958_c0_seq1	2	0.00078461	0.978049	0.00171516	0.000837313	0.0186144
comp2247991_c0_seq1	5	0.00058022	0.0384297	0.000659003	0.000529243	0.959802
comp2247993_c0_seq2	1	0.820049	0.000269599	0.0276232	0.151774	0.000284103
comp2248027_c0_seq1	5	0.00569527	0.0411087	0.00449268	0.00489843	0.943805
comp2248034_c0_seq1	2	0.000289638	0.905155	0.000431511	0.000267098	0.0938565
comp2248044_c0_seq1	5	0.00264522	0.0604827	0.00260772	0.00231915	0.931945
comp2248047_c0_seq1	5	0.0398753	0.207878	0.0353944	0.0356	0.681252
comp2248055_c0_seq2	1	0.846986	0.00186375	0.0455205	0.103361	0.00226814
comp2248057_c0_seq1	5	0.080712	0.104083	0.0514662	0.0797661	0.683973
comp2248059_c0_seq4	2	0.00030302	0.990257	0.000570866	0.000283799	0.00858552
comp2248064_c0_seq2	3	0.159173	0.000967929	0.792103	0.0471988	0.000557198
comp2248064_c2_seq1	3	0.016542	0.000151475	0.973867	0.00935805	8.13717e-05
comp2248109_c0_seq1	2	0.000857678	0.972541	0.00163132	0.000840841	0.0241297
gnl_Pdu_trscr_assembly_1_263847	1	0.448249	0.000343587	0.144711	0.406406	0.000289429
comp2248120_c0_seq2	5	0.000148483	0.0399198	0.00018721	0.000144426	0.9596
comp2248121_c0_seq5	1	0.903543	2.25997e-05	0.0100786	0.0863347	2.07172e-05
comp2248164_c0_seq1	1	0.989229	6.5602e-06	0.00207882	0.00867938	6.1221e-06
comp2248171_c0_seq8	2	0.00656764	0.928059	0.0169214	0.00681654	0.0416355
comp2248177_c1_seq1	5	0.00448629	0.0700127	0.00398647	0.00359499	0.91792
comp2248191_c0_seq2	2	0.000428979	0.977935	0.000750467	0.000384916	0.0205006
comp2248195_c0_seq2	1	0.970407	2.86717e-05	0.00445793	0.0250763	2.96846e-05
comp2248226_c3_seq1	4	0.00335049	1.98096e-05	0.00823136	0.988381	1.69764e-05
comp2248245_c0_seq1	4	0.241999	0.0641284	0.149361	0.375471	0.16904
comp2248271_c0_seq1	2	0.000480326	0.965819	0.00081087	0.000469504	0.0324198
gnl_Pdu_trscr_assembly_1_945	5	0.000156533	0.0060317	0.00016933	0.000158636	0.993484
gnl_Pdu_trscr_assembly_1_13616	5	0.000229193	0.0101753	0.000254117	0.000228251	0.989113
comp2248311_c0_seq1	5	0.00141518	0.46515	0.00195938	0.00131387	0.530162
comp2248335_c1_seq1	4	0.439466	5.73529e-05	0.0192508	0.541171	5.48116e-05
gnl_Pdu_trscr_assembly_1_3259	4	0.00464542	2.56592e-05	0.00964449	0.985662	2.25121e-05
comp2248355_c0_seq3	4	0.372097	0.0150911	0.133479	0.452718	0.026615
comp2248368_c0_seq1	2	0.00336349	0.949247	0.00737403	0.0034361	0.0365797
comp2248374_c0_seq1	1	0.985251	2.58995e-05	0.00454931	0.0101496	2.45974e-05
comp2248394_c0_seq1	5	0.00110452	0.270047	0.00156703	0.0012059	0.726076
comp2248410_c0_seq1	5	6.77619e-05	0.00841362	8.55492e-05	7.27798e-05	0.99136
comp2248412_c0_seq1	5	0.00492306	0.367026	0.00663167	0.00471629	0.616703
comp2248426_c0_seq1	1	0.96839	0.000146561	0.0182792	0.0130574	0.000126609
comp2248429_c0_seq1	5	0.000140503	0.0103594	0.000168556	0.000144613	0.989187
comp2248442_c1_seq2	1	0.940183	0.000202015	0.0378659	0.0215838	0.000165142
comp2248445_c0_seq1	5	0.000654671	0.0120351	0.000624529	0.000636842	0.986049
comp2248454_c1_seq1	5	0.023286	0.149886	0.0214963	0.0224899	0.782842
comp2248460_c0_seq1	2	0.000761174	0.914368	0.00115636	0.000707291	0.0830068
comp2248466_c0_seq1	2	0.0164655	0.847723	0.0510987	0.0187466	0.0659665
comp2248476_c0_seq1	2	0.00181535	0.946868	0.00318684	0.00160878	0.0465207
comp2248506_c0_seq1	5	0.000661428	0.323654	0.000956016	0.000678685	0.674049
comp2248510_c0_seq1	2	0.000528638	0.927943	0.000845342	0.000519211	0.0701635
comp2248527_c0_seq2	4	0.0719569	5.76751e-05	0.114249	0.81369	4.59994e-05
comp2248548_c0_seq1	3	0.134625	0.0946886	0.491945	0.234431	0.04431
comp2248557_c0_seq1	4	0.0220348	1.05741e-05	0.00612568	0.971819	9.52725e-06
comp2248569_c0_seq1	4	0.00143586	2.71519e-06	0.00103111	0.997528	2.47866e-06
comp2248585_c0_seq2	5	0.000229372	0.00844848	0.000242327	0.000231267	0.990849
comp2248588_c0_seq1	1	0.757898	0.00240826	0.0700642	0.166656	0.00297427
comp2248635_c0_seq2	4	0.00578918	3.62693e-05	0.00706843	0.987072	3.40547e-05
comp2248640_c0_seq1	4	0.384998	7.21597e-05	0.0157527	0.599104	7.25801e-05
comp2248643_c1_seq1	1	0.989271	4.9768e-06	0.00187561	0.00884351	4.58775e-06
comp2248645_c0_seq3	3	0.0192132	0.000435488	0.934944	0.0451637	0.00024339
comp2248645_c1_seq1	4	0.0384733	0.000325528	0.161766	0.799177	0.000257516
comp2248657_c0_seq1	3	0.446636	0.000185421	0.447629	0.105416	0.000133966
comp2248694_c0_seq4	2	0.000280182	0.991013	0.000532111	0.000263447	0.00791135
comp2248712_c0_seq3	3	0.111768	0.00244767	0.749071	0.135282	0.00143109
comp2248716_c0_seq1	1	0.774934	4.07353e-05	0.0119445	0.213041	3.97286e-05
comp2248717_c0_seq4	2	0.000506978	0.984672	0.00102875	0.000499317	0.0132928
comp2248738_c0_seq1	4	0.00303831	6.27323e-06	0.00310851	0.993841	5.5253e-06
comp2248746_c0_seq2	2	0.000252827	0.993683	0.000523859	0.000240555	0.00529974
comp2248750_c1_seq2	2	0.000125858	0.992069	0.000236036	0.000126371	0.0074426
comp2248760_c0_seq1	2	0.00337442	0.808404	0.00475833	0.00292349	0.18054
gnl_Pdu_trscr_assembly_1_2516	4	0.0836876	0.000155314	0.0367877	0.879225	0.000144826
comp2248791_c0_seq4	4	0.0263538	4.54133e-05	0.0647882	0.908776	3.68039e-05
comp2248794_c0_seq1	1	0.468855	0.000151393	0.415105	0.115777	0.000112171
comp2248798_c0_seq2	1	0.958061	0.000134954	0.0183468	0.023332	0.000125107
comp2248802_c1_seq2	1	0.949725	3.77981e-05	0.0158127	0.0343921	3.28983e-05
comp2248806_c0_seq1	4	0.0365237	0.0010423	0.299141	0.662535	0.000758282
comp2248808_c0_seq2	2	0.000223106	0.989553	0.000417283	0.000220546	0.0095858
comp2248818_c0_seq1	1	0.86023	0.00316398	0.0809713	0.0526701	0.0029651
comp2248842_c0_seq4	5	0.00038533	0.0777055	0.000475996	0.000357034	0.921076
comp2248854_c0_seq2	4	0.23587	0.000231159	0.0220993	0.741536	0.000264026
comp2248854_c1_seq1	4	0.346654	0.00145248	0.0525594	0.597372	0.00196236
comp2248857_c0_seq2	2	0.00898539	0.878788	0.0183876	0.00826129	0.0855775
comp2248859_c2_seq1	5	0.000634767	0.0281088	0.000710415	0.000645599	0.9699
comp2248879_c0_seq1	5	0.000487816	0.110852	0.00061543	0.00044676	0.887598
comp2248885_c0_seq1	4	0.136775	0.000138128	0.0404429	0.822516	0.000128262
gnl_Pdu_trscr_assembly_1_333834	1	0.997138	5.52261e-06	0.000934219	0.00191733	5.27727e-06
comp2248933_c1_seq1	1	0.492665	0.000661683	0.145577	0.360488	0.000608527
comp2248939_c0_seq3	1	0.672397	0.024439	0.176869	0.103718	0.0225774
comp2248955_c0_seq1	4	0.00139505	6.4454e-06	0.0020961	0.996497	5.79259e-06
comp2249005_c0_seq2	2	0.000526976	0.986697	0.00112403	0.000544126	0.0111079
comp2249007_c0_seq1	2	6.96222e-05	0.997324	0.000131696	6.51709e-05	0.00240979
comp2249008_c0_seq1	5	0.0168808	0.0878389	0.0135729	0.0157287	0.865979
comp2249011_c0_seq1	5	0.000926895	0.0811549	0.00110956	0.000914175	0.915895
comp2249042_c0_seq1	1	0.949935	2.25012e-05	0.0123386	0.0376843	1.95558e-05
comp2249043_c0_seq1	1	0.778278	0.00108413	0.174329	0.0455079	0.000801163
comp2249047_c0_seq1	5	0.0717807	0.188189	0.0604389	0.0703271	0.609264
comp2249053_c0_seq1	2	0.00140626	0.660265	0.00207356	0.00144655	0.334809
comp2249058_c0_seq2	2	0.00147925	0.824475	0.00213077	0.00135517	0.17056
comp2249059_c0_seq1	4	0.0489758	0.00105077	0.03829	0.910406	0.00127725
comp2249062_c0_seq1	2	0.000737488	0.707653	0.00103711	0.000699782	0.289873
comp2249071_c0_seq1	5	0.00127189	0.0223237	0.00123467	0.00128374	0.973886
comp2249077_c0_seq1	1	0.601235	0.000173518	0.165568	0.232882	0.000141574
comp2249082_c0_seq1	3	0.203624	0.0292188	0.536943	0.212921	0.0172932
comp2249090_c0_seq1	2	0.00122881	0.924659	0.00217316	0.00126215	0.0706767
comp2249145_c0_seq2	5	0.178963	0.11887	0.0955016	0.137873	0.468793
comp2249164_c0_seq1	1	0.913413	0.00127659	0.0334928	0.050349	0.00146898
comp2249175_c0_seq1	2	0.012408	0.792603	0.0186753	0.0105583	0.165755
comp2249177_c0_seq1	1	0.953049	4.1289e-05	0.00676473	0.040103	4.24121e-05
comp2249185_c0_seq2	1	0.500528	9.29997e-05	0.0293849	0.469905	8.92086e-05
comp2249204_c0_seq1	5	0.000505199	0.259983	0.00066817	0.000484102	0.73836
comp2249224_c0_seq3	5	0.000742325	0.440086	0.00103985	0.000745734	0.557386
comp2249227_c0_seq1	4	0.0247547	6.46417e-05	0.0100157	0.965099	6.61024e-05
comp2249230_c0_seq1	1	0.931209	0.000914071	0.0361732	0.0308172	0.000886897
comp2249251_c0_seq1	2	0.000148854	0.987142	0.000281555	0.000162769	0.0122651
comp2249258_c0_seq1	2	0.00053298	0.98815	0.00119961	0.000553168	0.00956429
comp2249262_c0_seq3	2	0.123036	0.403358	0.189431	0.0985202	0.185655
comp2249280_c0_seq2	1	0.598528	0.00663562	0.264507	0.124809	0.00551983
comp2249298_c1_seq4	2	0.000344243	0.968381	0.000563891	0.000323658	0.0303877
comp2249314_c0_seq1	5	0.0816104	0.11429	0.0610631	0.0964712	0.646565
comp2249318_c0_seq3	2	0.00110765	0.859514	0.00182088	0.00115034	0.136407
comp2249336_c0_seq1	1	0.552582	5.53767e-05	0.0140878	0.43322	5.49357e-05
comp2249343_c0_seq1	3	0.0624429	0.000422007	0.504462	0.43236	0.000312888
comp2249361_c0_seq2	5	0.00490906	0.0349148	0.00401526	0.00452683	0.951634
comp2249367_c0_seq1	4	0.04034	0.000525853	0.0368518	0.921738	0.000544609
comp2249378_c0_seq1	4	0.0304986	0.000618568	0.12292	0.845454	0.000509438
comp2249384_c0_seq1	2	0.00836519	0.916801	0.0189055	0.00733222	0.0485957
comp2249390_c0_seq2	5	0.00376787	0.397042	0.00525026	0.00393402	0.590006
comp2249392_c0_seq1	4	0.0717182	8.01438e-05	0.00970084	0.918412	8.8363e-05
comp2249399_c0_seq6	2	0.000350686	0.991864	0.000728113	0.000329634	0.00672741
comp2249401_c0_seq2	2	0.00225702	0.964051	0.00531987	0.00227968	0.0260921
comp2249405_c0_seq1	1	0.540202	0.000927114	0.387241	0.0709892	0.000640981
[truncated: 6,599 more rows]

## Sheet: allSex
	cluster	membership.1	membership.2	membership.3	membership.4	membership.5
Pdu_Vtg_2.1	2	1.68646e-05	0.999874	1.74523e-05	7.39624e-05	1.79918e-05
Pdu_c-opsin1_cDNA_	2	2.10148e-05	0.999858	2.19729e-05	7.75687e-05	2.14053e-05
comp1176386_c0_seq1	1	0.98277	0.00192	0.003176	0.00212288	0.0100112
comp1192792_c0_seq1	2	1.56316e-05	0.999893	1.55543e-05	5.93267e-05	1.62871e-05
comp1193006_c0_seq1	2	0.00121411	0.992265	0.0019438	0.00356962	0.00100721
comp1194173_c0_seq1	4	0.00899509	0.362593	0.0103206	0.600875	0.0172159
comp1194290_c0_seq1	5	0.199858	0.0165409	0.0221114	0.0320052	0.729484
comp1195459_c0_seq1	2	2.03535e-05	0.999839	2.04256e-05	9.55471e-05	2.4551e-05
comp1197949_c0_seq1	4	0.068038	0.0928805	0.0821191	0.631023	0.125939
comp1281272_c0_seq1	5	0.154757	0.0167127	0.0225756	0.0340919	0.771862
comp1286751_c0_seq1	3	0.0597104	0.0224242	0.837722	0.031614	0.0485296
comp1317356_c0_seq1	3	0.0139565	0.00476411	0.966511	0.00756735	0.00720073
comp1326591_c0_seq1	5	0.0583518	0.0379431	0.0083024	0.0879489	0.807454
comp1330436_c0_seq1	4	0.00218706	0.00670598	0.00274489	0.981006	0.00735651
comp1334554_c0_seq1	3	0.000228766	0.000127623	0.999403	0.000137791	0.000102875
comp1340160_c0_seq1	4	0.0286435	0.190348	0.0138888	0.554097	0.213023
comp1547345_c0_seq1	2	6.81726e-05	0.999315	7.29304e-05	0.000458983	8.47195e-05
comp1725465_c0_seq2	3	1.00838e-05	7.13313e-06	0.999971	6.62913e-06	4.92017e-06
comp1879573_c0_seq1	1	0.998214	0.000200391	0.000258499	0.000232233	0.00109506
comp1934401_c0_seq1	5	0.256662	0.0500804	0.252956	0.0988386	0.341463
comp1940764_c2_seq1	2	0.00183329	0.989386	0.00134829	0.00533734	0.0020948
comp1941562_c0_seq1	2	0.00407839	0.968155	0.00370619	0.0178446	0.0062159
comp1946763_c1_seq1	3	1.12491e-05	8.03356e-06	0.999968	7.54319e-06	5.53594e-06
comp1955979_c0_seq1	2	1.0858e-05	0.99991	1.09082e-05	5.56878e-05	1.23801e-05
comp1977405_c0_seq1	2	1.07666e-05	0.999927	1.04664e-05	4.05218e-05	1.13686e-05
comp1979599_c0_seq1	2	0.0346275	0.487741	0.0208754	0.382159	0.0745967
comp1981028_c0_seq1	4	0.0141953	0.0409899	0.0059161	0.88824	0.0506592
comp1986706_c0_seq1	5	0.0483458	0.0082195	0.00491354	0.0350612	0.90346
comp1996768_c0_seq1	2	0.0398663	0.769417	0.0400586	0.0930318	0.0576259
comp2008730_c0_seq1_contamination	2	0.000454246	0.996967	0.00046778	0.00158804	0.000523319
comp2016072_c0_seq1	5	0.0907403	0.0313506	0.0628442	0.154334	0.660731
comp2020965_c0_seq1	3	0.0123739	0.00659226	0.960058	0.0102483	0.0107273
comp2042029_c0_seq1	3	0.000664777	0.000703994	0.997814	0.000499932	0.000316822
comp2115354_c1_seq1	5	0.0970544	0.33234	0.0341186	0.166262	0.370225
comp2116603_c0_seq1	3	1.2131e-05	8.7335e-06	0.999965	8.08632e-06	5.94195e-06
comp2132904_c0_seq1	2	1.45325e-05	0.999898	1.5001e-05	5.66687e-05	1.57296e-05
comp2133746_c1_seq1	4	0.00825589	0.215543	0.0086198	0.751557	0.0160244
comp2135534_c0_seq1_contamination	2	0.000356142	0.997623	0.000348534	0.00125343	0.000418684
comp2138011_c0_seq1	4	0.061509	0.0919467	0.0672229	0.404065	0.375256
comp2138260_c0_seq2	5	0.0980745	0.279447	0.024668	0.171811	0.425999
comp2138325_c0_seq1_contamination	2	0.000130581	0.999161	0.00013573	0.000435459	0.000137212
comp2138461_c0_seq1	4	0.0497987	0.264944	0.0551513	0.536351	0.0937547
comp2138517_c0_seq1	2	0.000523737	0.996224	0.000467905	0.00230743	0.000476587
comp2139063_c0_seq1	4	0.029148	0.173905	0.011152	0.585432	0.200362
comp2139274_c0_seq1	3	0.00156476	0.000549805	0.99689	0.000512278	0.000483362
comp2139301_c0_seq1	2	0.0049475	0.868397	0.00511418	0.113674	0.00786777
comp2139306_c0_seq1	1	0.92808	0.0041543	0.00442784	0.00643066	0.0569075
comp2139590_c0_seq1	2	0.000749833	0.995299	0.00110108	0.00220859	0.000641205
comp2140374_c0_seq1	3	0.0114824	0.00653381	0.965342	0.00849886	0.00814288
comp2140683_c0_seq1	5	0.223555	0.0173659	0.0234757	0.0338521	0.701751
comp2140763_c0_seq1	2	0.000951278	0.991824	0.00116678	0.00516719	0.000891199
comp2140879_c0_seq1	1	0.998288	0.000235815	0.000428588	0.000253776	0.000793582
comp2141094_c0_seq2	1	0.99723	0.000244704	0.000337871	0.000362795	0.0018242
comp2141575_c0_seq1	3	1.13555e-05	7.88379e-06	0.999968	7.29379e-06	5.54773e-06
comp2142005_c0_seq1_contamination	2	0.000420923	0.997295	0.000407021	0.00140421	0.00047307
comp2142040_c0_seq1	5	0.313675	0.0455147	0.0273019	0.293636	0.319872
comp2142244_c0_seq1	2	0.00702885	0.957887	0.00636164	0.0193387	0.00938351
comp2142866_c0_seq1	5	0.0359221	0.0206666	0.00831377	0.157296	0.777801
comp2143384_c0_seq1	1	0.992671	0.000738467	0.0006755	0.000892605	0.0050224
comp2158971_c0_seq1	3	1.6807e-05	1.06922e-05	0.999954	1.06798e-05	7.86429e-06
comp2186444_c0_seq1	3	2.17662e-05	1.4655e-05	0.999937	1.49756e-05	1.12421e-05
comp2188826_c0_seq1	4	0.0999769	0.10826	0.0920682	0.367662	0.332033
comp2194038_c0_seq1	3	8.09938e-05	6.83166e-05	0.999754	5.73996e-05	3.9557e-05
comp2195604_c0_seq1	3	0.00980321	0.00416829	0.974811	0.00531527	0.00590173
comp2197409_c0_seq2	2	0.000111435	0.999255	0.000124849	0.000402597	0.000105824
comp2197726_c1_seq1	1	0.98768	0.00240258	0.00318217	0.00201784	0.00471704
comp2197826_c0_seq1	2	0.00118835	0.992263	0.00192249	0.00363091	0.000994927
comp2199866_c0_seq1	3	1.07276e-05	7.6579e-06	0.999969	7.17983e-06	5.28958e-06
comp2200217_c0_seq1	4	0.00677349	0.018558	0.0113667	0.94195	0.0213522
comp2200231_c1_seq1	1	0.997527	0.000293417	0.000319432	0.000358698	0.00150189
comp2201951_c0_seq1	5	0.0990832	0.0952645	0.0983396	0.335739	0.371573
comp2204915_c0_seq1	5	0.059879	0.0418979	0.0103216	0.415323	0.472578
comp2205550_c0_seq1	4	0.00816847	0.0852711	0.0123556	0.873674	0.0205305
comp2206373_c0_seq1	3	0.000657403	0.000277362	0.99856	0.000259171	0.000246418
comp2206927_c0_seq1	1	0.993508	0.000773242	0.00165029	0.000851907	0.00321687
comp2206945_c0_seq1_contamination	2	0.00130124	0.992535	0.00119946	0.00355941	0.00140484
comp2210600_c0_seq1	2	1.81764e-05	0.999877	1.86726e-05	6.75263e-05	1.86015e-05
comp2215230_c0_seq1	4	0.00592835	0.0239033	0.0114022	0.941358	0.0174081
comp2217620_c0_seq2	2	0.000404747	0.997173	0.000566348	0.00148278	0.000373261
comp2218507_c0_seq9	4	0.0464892	0.0445057	0.0109344	0.648244	0.249827
comp2219607_c0_seq1	3	0.000987723	0.000717099	0.997017	0.000808333	0.000470241
comp2220651_c0_seq1	3	1.22947e-05	8.64589e-06	0.999965	8.36022e-06	6.17432e-06
comp2221143_c1_seq5	2	3.0192e-05	0.999812	2.60448e-05	0.000102039	2.97299e-05
comp2221239_c0_seq1	5	0.156799	0.0535009	0.0122443	0.0683713	0.709085
comp2221321_c1_seq1	2	3.92028e-05	0.999752	3.33267e-05	0.000134049	4.12009e-05
comp2221747_c1_seq1	4	0.00626983	0.15334	0.00641058	0.819779	0.0142005
comp2222433_c0_seq1	1	0.999187	9.30303e-05	0.000114227	0.000112124	0.000493885
comp2222760_c0_seq2	2	1.36467e-05	0.999905	1.29925e-05	5.42213e-05	1.40051e-05
comp2222948_c0_seq2	2	0.152234	0.383962	0.0275161	0.137629	0.298658
comp2222988_c0_seq1	5	0.0148116	0.0047482	0.0030714	0.0185913	0.958777
comp2223254_c0_seq1	3	0.00115634	0.00136974	0.99599	0.000923465	0.000560401
comp2223281_c0_seq1	3	0.151684	0.0744855	0.424087	0.11336	0.236384
comp2223979_c0_seq1	3	1.30797e-05	9.44891e-06	0.999962	8.77539e-06	6.46868e-06
comp2224365_c0_seq1	3	1.05487e-05	7.46548e-06	0.99997	6.94573e-06	5.14305e-06
comp2224545_c0_seq1	2	0.000204163	0.998688	0.000248754	0.000660445	0.000198477
comp2224691_c0_seq1	2	7.0285e-06	0.99995	7.03201e-06	2.83976e-05	7.43502e-06
comp2224691_c1_seq1	2	1.38833e-05	0.99989	1.39888e-05	6.73602e-05	1.51868e-05
comp2225010_c0_seq1	1	0.984957	0.00180495	0.00546113	0.00184489	0.00593153
comp2225756_c0_seq1	5	0.146351	0.0553275	0.0974429	0.343191	0.357688
comp2226330_c0_seq1	5	0.0577372	0.0863958	0.0166831	0.120399	0.718785
comp2226460_c0_seq1	4	0.00128263	0.00831717	0.0013841	0.985301	0.0037151
comp2226802_c0_seq1	1	0.509017	0.0228624	0.41034	0.0220006	0.0357796
comp2226803_c0_seq1	3	4.48132e-05	3.48529e-05	0.999867	3.13813e-05	2.15234e-05
comp2228911_c0_seq1	3	0.0204869	0.00624843	0.952581	0.00840109	0.0122826
comp2229376_c0_seq1	3	9.55952e-05	7.4037e-05	0.999708	7.39468e-05	4.89187e-05
comp2229493_c0_seq1	1	0.998894	0.000141513	0.000260402	0.000157226	0.000547326
comp2230112_c0_seq2	1	0.999451	7.06559e-05	0.000115193	7.7201e-05	0.000285937
comp2230134_c0_seq1	2	0.0179035	0.773831	0.0117503	0.143147	0.0533689
comp2230739_c0_seq2	4	0.0178573	0.0189625	0.0183659	0.838046	0.106769
comp2231117_c0_seq1	1	0.997568	0.000268908	0.000286885	0.000333776	0.0015428
comp2231173_c0_seq2	1	0.975397	0.00293625	0.0109636	0.00298352	0.00771922
comp2231489_c0_seq1	3	1.00509e-05	7.10384e-06	0.999971	6.60635e-06	4.91006e-06
comp2231629_c1_seq1	2	0.00543555	0.948499	0.00366735	0.031242	0.0111558
comp2231738_c0_seq1	4	0.00249868	0.00875831	0.00316115	0.977206	0.00837631
comp2232214_c0_seq1	3	1.26081e-05	9.10043e-06	0.999964	8.43097e-06	6.18645e-06
comp2232900_c0_seq1	5	0.0225724	0.0207195	0.0082007	0.380905	0.567603
comp2232909_c0_seq1	3	0.000100482	7.0357e-05	0.999727	5.90327e-05	4.34847e-05
comp2233436_c0_seq2	4	0.0111599	0.0880497	0.0108897	0.831042	0.0588586
comp2233645_c0_seq1	3	1.18418e-05	8.518e-06	0.999966	7.91112e-06	5.81436e-06
comp2234324_c0_seq2	2	0.00224934	0.985688	0.00402367	0.00625016	0.00178866
comp2234441_c0_seq1	3	0.120198	0.138566	0.55272	0.0873851	0.10113
comp2234463_c0_seq2	3	1.24434e-05	8.87138e-06	0.999965	8.10692e-06	5.96852e-06
comp2235000_c0_seq2	1	0.952073	0.00496073	0.0243219	0.00524955	0.0133948
comp2235466_c0_seq1	2	0.00132585	0.989792	0.00123376	0.00582125	0.00182704
comp2235485_c0_seq1	2	5.65484e-06	0.999959	5.51447e-06	2.42991e-05	6.00044e-06
comp2236190_c0_seq1	4	0.00884888	0.395968	0.00918867	0.567285	0.0187095
comp2236726_c0_seq1	1	0.998229	0.000186082	0.000255149	0.000236231	0.00109399
comp2236777_c0_seq2	3	0.000182242	0.000139132	0.999464	0.000127092	8.74949e-05
comp2236994_c0_seq1	3	1.74253e-05	1.28799e-05	0.999949	1.19323e-05	8.5629e-06
comp2237480_c0_seq2	1	0.344528	0.0386711	0.113222	0.166909	0.33667
comp2238090_c0_seq1	2	0.000265078	0.998473	0.000275392	0.000760962	0.000225677
comp2238128_c0_seq1	2	0.00296544	0.984085	0.00169967	0.00888715	0.00236262
comp2238162_c0_seq2	2	0.000810072	0.993086	0.000941565	0.00431649	0.000845964
comp2238171_c0_seq1	3	8.28231e-06	5.52097e-06	0.999977	5.44593e-06	4.10895e-06
comp2238321_c0_seq1	3	1.20939e-05	8.63929e-06	0.999965	7.97935e-06	5.8835e-06
comp2238628_c0_seq1	3	1.58977e-05	1.11234e-05	0.999955	1.03562e-05	7.9683e-06
comp2238758_c0_seq1	3	2.2673e-05	1.58199e-05	0.999935	1.50225e-05	1.1564e-05
comp2238763_c0_seq1	2	8.58971e-05	0.999426	0.0001017	0.000303809	8.21669e-05
comp2239022_c0_seq1	3	0.11754	0.0310518	0.73329	0.0608901	0.0572282
comp2239193_c0_seq2	2	0.00311383	0.981956	0.00181764	0.0102645	0.00284798
comp2239667_c0_seq1	3	0.00282238	0.000903751	0.994633	0.000829842	0.000811006
comp2239711_c0_seq1	2	0.000978615	0.98526	0.000993616	0.0113942	0.0013737
comp2239753_c0_seq1	2	0.00274503	0.943147	0.00285999	0.0470944	0.00415342
comp2239871_c0_seq1	3	1.24352e-05	8.8056e-06	0.999964	8.4296e-06	6.28131e-06
comp2239973_c0_seq1	3	0.0189017	0.00578589	0.9549	0.00873069	0.0116815
comp2240042_c0_seq1	1	0.998079	0.000229139	0.000254122	0.000273032	0.00116515
comp2240804_c0_seq1	1	0.995336	0.000648027	0.000648278	0.000617966	0.00274979
comp2240935_c0_seq1	1	0.998765	0.000149566	0.000203511	0.00017419	0.000707831
comp2240992_c0_seq1	2	0.000776706	0.995006	0.000839642	0.0024852	0.000891985
comp2241111_c0_seq1	3	0.00192873	0.00112571	0.994987	0.00111849	0.000839748
comp2241380_c0_seq2	3	9.81429e-06	6.75657e-06	0.999972	6.33966e-06	4.80385e-06
comp2241541_c0_seq2	5	0.234036	0.015421	0.0263603	0.0633711	0.660812
comp2241744_c0_seq2	5	0.0544382	0.0103803	0.014684	0.0588322	0.861665
comp2242278_c0_seq1	5	0.0672058	0.0995135	0.0131506	0.164578	0.655552
comp2242849_c0_seq1	2	2.08783e-05	0.999859	2.12125e-05	7.65535e-05	2.21793e-05
comp2243066_c0_seq1	4	0.0443053	0.124944	0.157675	0.57209	0.100985
comp2243340_c0_seq1	3	3.9475e-05	2.86289e-05	0.999884	2.7118e-05	2.07553e-05
comp2243381_c1_seq2	3	1.58574e-05	1.16158e-05	0.999954	1.05117e-05	7.69631e-06
comp2243479_c0_seq1	2	5.16941e-05	0.999634	6.09807e-05	0.000202091	5.12656e-05
comp2244049_c0_seq3	4	0.0070537	0.142097	0.00815518	0.828138	0.0145561
comp2244112_c0_seq1	2	0.00430597	0.931733	0.0035003	0.0537411	0.00671939
comp2244207_c0_seq1	3	0.00337397	0.00500496	0.987072	0.00290155	0.00164728
comp2244330_c0_seq1	2	0.00226414	0.971188	0.00261938	0.0207832	0.00314522
comp2244379_c0_seq1	2	1.37008e-05	0.999883	1.38238e-05	7.42684e-05	1.56959e-05
comp2244843_c0_seq4	1	0.997516	0.000304196	0.00031057	0.000356454	0.00151282
comp2245017_c0_seq1	4	0.0101267	0.227998	0.0068124	0.725723	0.0293395
comp2245447_c0_seq1	3	1.17265e-05	8.42155e-06	0.999966	7.81106e-06	5.75237e-06
comp2245483_c2_seq1	2	9.2885e-05	0.999376	9.59125e-05	0.00033197	0.000103602
comp2245788_c0_seq1	5	0.169003	0.0119247	0.0261644	0.0413894	0.751518
comp2245797_c0_seq4	5	0.0431904	0.0116675	0.0149945	0.083169	0.846979
comp2246063_c0_seq1	5	0.0157116	0.00441711	0.0021765	0.0118927	0.965802
comp2246134_c0_seq1	1	0.989578	0.00125576	0.00371997	0.0013078	0.00413823
comp2246361_c0_seq1	5	0.145836	0.232227	0.0204143	0.197892	0.403631
comp2246681_c1_seq1	4	0.0689956	0.0602963	0.233637	0.468124	0.168947
comp2246786_c0_seq1	2	3.91225e-05	0.999732	4.34946e-05	0.000144541	4.05242e-05
comp2247082_c0_seq2	4	0.0141243	0.0315754	0.00619085	0.745103	0.203006
comp2247149_c0_seq3	3	2.18376e-05	1.65388e-05	0.999936	1.49643e-05	1.07197e-05
comp2247380_c0_seq1	4	0.0403294	0.0306657	0.0157968	0.780693	0.132515
comp2247432_c0_seq1	1	0.996601	0.000431	0.000493857	0.00052212	0.00195171
comp2247532_c0_seq3	5	0.0666083	0.0621189	0.0226754	0.103127	0.74547
comp2247542_c0_seq2	3	0.0640671	0.0303453	0.78672	0.0498034	0.0690641
comp2247702_c0_seq1	3	1.15394e-05	8.26504e-06	0.999967	7.67971e-06	5.65834e-06
comp2248059_c0_seq4	5	0.245407	0.0133275	0.0168225	0.0548191	0.669624
comp2248189_c1_seq1	3	0.000297009	0.000125434	0.999337	0.000123845	0.000116223
comp2248564_c0_seq6	2	0.000711083	0.995176	0.000710789	0.00258528	0.000817218
comp2248813_c0_seq1	2	9.17339e-05	0.999371	9.80549e-05	0.00034298	9.61499e-05
comp2248818_c0_seq1	3	0.00022823	0.000216565	0.999273	0.000170062	0.000112519
comp2248939_c0_seq3	3	0.000542141	0.000235913	0.998724	0.000258092	0.000239442
comp2248976_c0_seq1	2	0.0057028	0.950486	0.00362798	0.0344387	0.00574497
comp2249035_c0_seq1	4	0.0982707	0.141918	0.256327	0.266586	0.236899
comp2249046_c0_seq1	5	0.14895	0.0275384	0.0856807	0.13827	0.59956
comp2249058_c0_seq2	5	0.0932006	0.00721805	0.00979882	0.0247501	0.865033
comp2249213_c0_seq3	3	0.00028922	0.000131629	0.999312	0.000145388	0.000121831
comp2249379_c0_seq1	1	0.966302	0.00309478	0.00408141	0.00362637	0.0228956
comp2249595_c0_seq1	2	0.00302222	0.98304	0.00191233	0.00935918	0.00266624
comp2250208_c0_seq1	5	0.0730042	0.187009	0.0192629	0.335318	0.385405
comp2250225_c0_seq2	3	0.00882283	0.0177908	0.960568	0.00845349	0.00436498
comp2250367_c0_seq2	3	0.00384472	0.00118112	0.99276	0.00106966	0.00114413
comp2250456_c0_seq1	4	0.00360556	0.00688725	0.00377611	0.971145	0.0145861
comp2250603_c0_seq1	1	0.926474	0.00749631	0.00821783	0.0106606	0.0471511
comp2250615_c0_seq1	2	8.44429e-06	0.999941	8.29722e-06	3.30604e-05	8.73991e-06
comp2250646_c0_seq1	3	0.000110957	8.90235e-05	0.999665	7.822e-05	5.65728e-05
comp2250838_c0_seq2	3	1.3523e-05	9.69015e-06	0.999961	9.00595e-06	6.69266e-06
comp2250941_c0_seq1	2	2.68217e-05	0.999806	2.44847e-05	0.000111261	3.14215e-05
comp2250963_c0_seq1	3	0.000218116	0.000130071	0.999384	0.000154678	0.000112977
comp2251008_c0_seq2	2	3.95473e-05	0.999736	4.01017e-05	0.000143633	4.11357e-05
comp2251221_c0_seq1	3	0.172634	0.0279645	0.551387	0.0849751	0.163039
comp2251291_c0_seq2	3	0.00157216	0.000642046	0.996695	0.000545454	0.000545719
comp2251343_c0_seq4	4	0.0303055	0.0309866	0.0325669	0.758621	0.14752
comp2251363_c0_seq1	3	1.1741e-05	8.43283e-06	0.999966	7.82784e-06	5.76083e-06
comp2251434_c0_seq1	4	0.0258434	0.0428536	0.00815075	0.820804	0.102348
comp2251440_c0_seq1_contamination	2	0.0010453	0.993226	0.00089567	0.00352685	0.00130574
comp2251501_c0_seq2	2	0.000759884	0.994162	0.000489712	0.00372755	0.000860728
comp2251540_c0_seq1	1	0.998677	0.000144124	0.000163725	0.000173549	0.000841204
comp2251682_c0_seq3	3	2.09982e-05	1.34639e-05	0.999943	1.306e-05	9.46692e-06
comp2251705_c0_seq1	2	0.0513833	0.339987	0.0214579	0.270157	0.317014
comp2251755_c0_seq1	2	0.000422673	0.994388	0.000425717	0.00412057	0.000642641
comp2251798_c0_seq1	2	0.00857336	0.939243	0.00418486	0.0344116	0.0135875
comp2251806_c0_seq1	2	0.0826334	0.385843	0.0227722	0.358469	0.150283
comp2252017_c0_seq1	5	0.0397566	0.0106462	0.00798817	0.0310386	0.91057
comp2252040_c0_seq1	5	0.0729092	0.124027	0.0222138	0.144784	0.636066
comp2252156_c0_seq4	1	0.999102	0.000115191	0.000196644	0.000131894	0.00045411
comp2252319_c0_seq2	1	0.383381	0.0391542	0.380618	0.0493114	0.147535
comp2252342_c0_seq4	4	0.0182625	0.0216435	0.0228263	0.852548	0.0847194
comp2252412_c0_seq1	3	0.00908774	0.00348256	0.977622	0.00460603	0.00520195
comp2252443_c0_seq2	3	2.28288e-05	1.70143e-05	0.999933	1.54059e-05	1.13342e-05
comp2252595_c0_seq1	3	1.46815e-05	1.06812e-05	0.999958	9.77145e-06	7.21016e-06
comp2252742_c0_seq1	3	1.12655e-05	8.05444e-06	0.999968	7.51291e-06	5.55233e-06
comp2253589_c0_seq1	3	0.000524037	0.000554148	0.998249	0.000414685	0.000258035
comp2253679_c0_seq3	5	0.0851009	0.0132634	0.0246655	0.094153	0.782817
comp2253801_c0_seq1	2	0.000229536	0.998499	0.000297495	0.000763833	0.000210258
comp2253972_c0_seq1	2	0.000222412	0.998467	0.000223092	0.000860516	0.000227294
comp2253990_c0_seq2	4	0.0155531	0.0161654	0.0150884	0.873066	0.0801272
comp2253996_c0_seq1	3	0.00931026	0.00295623	0.977877	0.00446653	0.00538976
comp2254063_c0_seq2	2	8.44687e-06	0.999941	8.3676e-06	3.33014e-05	8.91202e-06
comp2254076_c0_seq1	2	7.11717e-05	0.999398	6.02765e-05	0.000382878	8.73638e-05
comp2254120_c0_seq2	3	9.47629e-06	6.61351e-06	0.999973	6.11382e-06	4.57757e-06
comp2254171_c0_seq2	3	3.67799e-05	2.76013e-05	0.999892	2.46809e-05	1.87206e-05
comp2254290_c0_seq1	1	0.906084	0.0281588	0.0118205	0.017887	0.0360496
comp2254291_c0_seq1	3	1.03086e-05	7.15208e-06	0.999971	6.62441e-06	5.00277e-06
comp2254308_c0_seq1	2	0.00236533	0.980315	0.00318995	0.0114772	0.00265238
comp2254337_c0_seq1	3	0.0101101	0.00255775	0.980173	0.00362671	0.0035329
comp2254339_c0_seq1	5	0.0210049	0.00596366	0.00337733	0.021451	0.948203
comp2254414_c0_seq1	2	0.00722867	0.952536	0.0169571	0.0180991	0.00517889
comp2254577_c0_seq3	2	0.0002741	0.997881	0.000209406	0.00133462	0.000300839
comp2254777_c1_seq1	4	0.0196114	0.0349642	0.0284047	0.78393	0.13309
comp2254966_c0_seq1	3	1.31887e-05	9.568e-06	0.999962	8.81924e-06	6.46805e-06
comp2255078_c0_seq3	2	1.35602e-05	0.999907	1.37085e-05	5.18176e-05	1.41112e-05
comp2255138_c0_seq3	3	7.02001e-05	3.83689e-05	0.999821	3.81854e-05	3.18007e-05
comp2255195_c0_seq2	3	0.00211713	0.00248115	0.992973	0.00147	0.000959006
comp2255240_c0_seq1	2	0.00262541	0.963403	0.00276993	0.0280743	0.00312771
comp2255341_c1_seq1_contamination	2	7.45663e-05	0.999515	7.50118e-05	0.000256469	7.87073e-05
comp2255421_c0_seq4	2	0.0192742	0.878456	0.0115524	0.0642531	0.0264643
comp2255482_c0_seq1	2	0.000267756	0.998219	0.000361071	0.000904003	0.000247979
comp2255626_c4_seq1_contamination	2	7.77803e-05	0.999491	7.93419e-05	0.000270048	8.19266e-05
comp2255979_c2_seq1	3	0.00252692	0.00295459	0.991615	0.00181046	0.0010934
comp2256206_c0_seq2	2	1.27969e-05	0.999913	1.30117e-05	4.8047e-05	1.31802e-05
comp2256220_c0_seq1	1	0.592351	0.0208493	0.157091	0.0469541	0.182755
comp2256232_c0_seq1	3	1.23486e-05	8.73821e-06	0.999965	8.0667e-06	5.93608e-06
comp2256295_c0_seq2	4	0.00279133	0.0394255	0.00290508	0.94641	0.00846819
comp2256337_c0_seq2	2	0.00480478	0.968833	0.0102766	0.0124763	0.0036093
comp2256376_c1_seq2	3	0.00132543	0.000787676	0.99629	0.000819953	0.000776509
comp2256388_c0_seq2	3	0.0713041	0.0250358	0.818467	0.0314977	0.0536954
comp2256904_c0_seq1	2	0.00113647	0.992665	0.00131603	0.00360848	0.0012738
comp2257406_c0_seq1	3	1.15986e-05	8.32314e-06	0.999967	7.71966e-06	5.6883e-06
comp2257469_c0_seq1	5	0.0705894	0.0998878	0.0140608	0.135924	0.679538
comp2257612_c0_seq1	2	8.89127e-06	0.999938	8.89509e-06	3.46207e-05	9.3728e-06
comp2257617_c0_seq6	2	0.000877735	0.994321	0.00135962	0.00261841	0.000822925
comp2257715_c1_seq3	2	0.00286212	0.981362	0.00545654	0.00806881	0.0022508
comp2257746_c0_seq2	5	0.130147	0.0135298	0.0211388	0.0641394	0.771045
comp2257772_c0_seq1	3	1.20019e-05	8.62627e-06	0.999966	7.98688e-06	5.87846e-06
comp2257797_c0_seq1	5	0.0620607	0.0213561	0.0102429	0.310428	0.595913
comp2258124_c0_seq1	3	1.24186e-05	8.45994e-06	0.999965	7.90872e-06	5.89384e-06
comp2258124_c1_seq1	3	9.33387e-06	6.53561e-06	0.999973	6.2122e-06	4.64659e-06
comp2258219_c0_seq1	2	1.65361e-05	0.999886	1.69279e-05	6.36419e-05	1.7304e-05
comp2258290_c0_seq1	5	0.045953	0.0204719	0.00621571	0.0577808	0.869579
comp2258311_c0_seq2	3	1.98136e-05	1.43838e-05	0.999942	1.36968e-05	9.90013e-06
comp2258382_c0_seq1	4	0.104214	0.209555	0.0161125	0.434542	0.235577
comp2258601_c0_seq1	2	0.000577274	0.995954	0.000436432	0.00236223	0.000669872
comp2258643_c0_seq1	2	0.00129426	0.992074	0.00170156	0.0038952	0.00103507
comp2258775_c0_seq1	3	0.00119087	0.00137426	0.995894	0.000973922	0.000567423
comp2258794_c0_seq1	2	0.000234887	0.998362	0.000264859	0.000886121	0.000252071
comp2258817_c0_seq1	3	0.00540119	0.00241777	0.986435	0.00265538	0.0030911
comp2258826_c0_seq1	2	0.000179792	0.998853	0.000213381	0.000587774	0.000166551
comp2258842_c0_seq1	4	0.0585412	0.145812	0.0134629	0.532831	0.249353
comp2258861_c0_seq2	4	0.107461	0.0917314	0.0566649	0.379281	0.364862
comp2258896_c0_seq1	4	0.0171634	0.0215102	0.0254439	0.880806	0.0550763
comp2259070_c0_seq2	4	0.0298513	0.393581	0.0168637	0.513452	0.0462521
comp2259130_c0_seq2	4	0.0162236	0.0178491	0.0184515	0.877484	0.0699922
comp2259156_c0_seq2	2	0.000524778	0.994325	0.000622853	0.00391166	0.000615609
comp2259175_c0_seq1	3	0.0408732	0.00865567	0.925603	0.0124914	0.012377
comp2259229_c0_seq1	2	0.00466359	0.876102	0.00491364	0.106861	0.00745994
comp2259310_c0_seq2	2	8.98236e-06	0.999938	8.85472e-06	3.43076e-05	9.41903e-06
comp2259353_c0_seq2	3	1.00882e-05	7.12531e-06	0.999971	6.66827e-06	4.98149e-06
comp2259386_c0_seq1	5	0.0489398	0.0275024	0.00684449	0.0731047	0.843609
comp2259400_c0_seq3	1	0.997204	0.00027805	0.000335304	0.000356679	0.00182548
comp2259525_c0_seq2	5	0.013078	0.0076798	0.00257511	0.0328575	0.94381
comp2259595_c0_seq1	2	8.05602e-06	0.999936	8.29904e-06	3.77419e-05	9.42965e-06
comp2259598_c0_seq4	4	0.00400245	0.0380685	0.00448817	0.943953	0.00948747
comp2259838_c0_seq2	3	4.38521e-05	3.09737e-05	0.999873	2.95353e-05	2.2799e-05
comp2259858_c0_seq2	2	0.000364828	0.997654	0.00049276	0.00116395	0.000324132
comp2260060_c1_seq1	5	0.190319	0.290376	0.0242633	0.185946	0.309096
comp2260208_c0_seq1	5	0.044406	0.0194931	0.0121228	0.350511	0.573467
comp2260225_c1_seq2	5	0.0839249	0.0269529	0.0723737	0.156196	0.660553
comp2260667_c0_seq3	3	0.00248037	0.00278362	0.991766	0.00181796	0.00115208
comp2260735_c0_seq2	5	0.208329	0.0417001	0.0194697	0.145823	0.584678
comp2260931_c0_seq2	4	0.00873659	0.19548	0.00743922	0.771286	0.017058
comp2260946_c0_seq3	2	0.00788239	0.756323	0.00779512	0.214472	0.0135273
comp2261034_c0_seq3	3	6.87771e-06	4.44869e-06	0.999981	4.15689e-06	3.18629e-06
comp2261079_c0_seq1	5	0.050918	0.0151135	0.0208338	0.0773156	0.835819
comp2261228_c0_seq1	1	0.566137	0.0404125	0.191236	0.0459385	0.156277
comp2261236_c0_seq1	2	0.0117351	0.895747	0.00606581	0.0626441	0.023808
comp2261322_c0_seq1	3	9.66361e-06	6.66386e-06	0.999973	6.16956e-06	4.61614e-06
comp2261336_c0_seq1	5	0.0508347	0.0275723	0.00673717	0.140379	0.774476
comp2261389_c0_seq3	3	1.13239e-05	7.86957e-06	0.999968	7.39504e-06	5.62693e-06
comp2261404_c0_seq2	2	0.00017543	0.998896	0.000165237	0.000575735	0.000187514
comp2261415_c0_seq1	2	8.6746e-05	0.999442	9.84482e-05	0.000291291	8.11126e-05
comp2261424_c0_seq4	3	0.0171841	0.00393504	0.971636	0.00345902	0.00378576
comp2261460_c0_seq2	1	0.8888	0.00706095	0.021218	0.0118901	0.0710312
comp2261576_c0_seq2	2	0.0164105	0.701721	0.0152647	0.247498	0.0191056
comp2261606_c0_seq1	3	0.00758167	0.0148157	0.966102	0.00763396	0.00386695
comp2261615_c0_seq4	1	0.999072	0.000100528	0.000129461	0.000129242	0.000568881
comp2261663_c0_seq1	1	0.99356	0.001008	0.000875386	0.000928392	0.00362782
comp2261794_c1_seq4	4	0.00414555	0.00899486	0.0045132	0.964521	0.017825
comp2261973_c0_seq3	2	0.00724654	0.831177	0.00792841	0.141464	0.012184
comp2262013_c0_seq1	2	0.0564371	0.574713	0.0145435	0.257544	0.0967624
comp2262050_c0_seq1	2	0.000238445	0.998363	0.000273436	0.000861811	0.000262919
comp2262067_c0_seq1	2	0.000676619	0.995492	0.00058322	0.00241729	0.000830911
comp2262122_c0_seq14	2	7.38113e-06	0.999938	7.30623e-06	3.88862e-05	8.54973e-06
comp2262122_c1_seq1	2	6.82695e-06	0.999944	6.8836e-06	3.4207e-05	7.83433e-06
comp2262143_c0_seq5	2	0.0109601	0.891252	0.00632066	0.0708468	0.0206201
comp2262204_c0_seq1	5	0.175934	0.0526465	0.140737	0.113348	0.517335
comp2262340_c0_seq2	2	8.96913e-06	0.999937	8.61512e-06	3.54326e-05	9.70302e-06
comp2262361_c0_seq1	4	0.0080019	0.190205	0.00960264	0.772893	0.0192974
comp2262399_c0_seq2	3	1.10626e-05	7.39081e-06	0.999969	7.10636e-06	5.45331e-06
comp2262413_c0_seq1	1	0.95587	0.00502866	0.0223217	0.0050652	0.0117149
comp2262459_c0_seq3	5	0.100977	0.136319	0.0469817	0.131464	0.584258
comp2262554_c0_seq1	2	1.66768e-05	0.999884	1.63163e-05	6.49963e-05	1.83648e-05
comp2262560_c1_seq1_contamination	2	0.000217144	0.998573	0.000228048	0.000742774	0.000238696
comp2262597_c0_seq3	3	0.0132284	0.0082533	0.958382	0.0118819	0.008254
comp2262712_c0_seq1	2	0.000814632	0.994383	0.000749933	0.00299305	0.00105935
comp2262867_c0_seq2	2	0.000873021	0.993727	0.00119568	0.00344283	0.000761927
comp2262931_c0_seq2	2	0.00708534	0.740866	0.00783258	0.232065	0.0121517
comp2262943_c0_seq1	4	0.00975028	0.0125779	0.00926726	0.919078	0.0493264
comp2263011_c0_seq1	2	0.00111773	0.991328	0.00148633	0.00498207	0.00108611
comp2263060_c0_seq1	3	0.00065181	0.000673854	0.997892	0.000475026	0.000307325
comp2263066_c0_seq2	2	0.00396945	0.980768	0.00185104	0.00980955	0.00360215
comp2263114_c0_seq2	1	0.989785	0.00131431	0.00359161	0.00134657	0.00396284
comp2263195_c0_seq3	3	1.15378e-05	8.26834e-06	0.999967	7.67382e-06	5.66014e-06
comp2263314_c1_seq1	5	0.109879	0.0152342	0.034671	0.0854169	0.754799
comp2263345_c0_seq2	2	0.000349532	0.997808	0.000314281	0.00112622	0.000402037
comp2263414_c0_seq1	2	0.000412731	0.997127	0.000538415	0.00155522	0.00036624
comp2263482_c0_seq1	2	2.7574e-05	0.999819	2.79176e-05	9.75818e-05	2.75006e-05
comp2263493_c0_seq2	2	2.32585e-05	0.999795	2.3416e-05	0.000131421	2.70535e-05
comp2263641_c1_seq2	3	0.000115061	9.64728e-05	0.999649	8.15186e-05	5.75137e-05
comp2263828_c0_seq2	5	0.096871	0.0119799	0.0164474	0.0665954	0.808106
comp2263928_c0_seq2	4	0.0314983	0.265637	0.0123775	0.637087	0.0534002
comp2263951_c0_seq2	5	0.0313303	0.0259905	0.0116501	0.145363	0.785666
comp2264137_c1_seq2	1	0.990841	0.000990534	0.00217652	0.00113002	0.0048624
comp2264138_c0_seq2	5	0.0412821	0.0108168	0.00552484	0.022688	0.919688
comp2264193_c0_seq2	2	2.02141e-05	0.999863	2.14362e-05	7.53694e-05	2.03233e-05
comp2264208_c0_seq1	2	0.0148679	0.529613	0.00836867	0.41464	0.0325106
comp2264227_c0_seq2	2	2.06209e-05	0.999861	2.16608e-05	7.59944e-05	2.07155e-05
comp2264343_c0_seq3	3	1.04237e-05	7.36669e-06	0.99997	6.82629e-06	5.10625e-06
comp2264479_c0_seq6	3	0.000118325	8.33361e-05	0.999675	7.10389e-05	5.23605e-05
comp2264543_c0_seq5	3	0.0505935	0.00943429	0.905623	0.0161756	0.018174
comp2264545_c0_seq1	1	0.990564	0.000817088	0.000969592	0.000953983	0.00669493
comp2264711_c0_seq7	1	0.997553	0.000286303	0.000377381	0.000363401	0.00141948
comp2264745_c0_seq4	2	0.0413245	0.739479	0.0177105	0.164417	0.0370688
comp2264820_c0_seq2	2	0.0195786	0.845801	0.0108616	0.0932622	0.0304961
comp2264887_c0_seq4	3	1.09467e-05	7.80641e-06	0.999969	7.25203e-06	5.35807e-06
comp2264946_c0_seq2	1	0.872929	0.0438576	0.0235435	0.0204281	0.0392421
comp2265059_c0_seq2	2	0.00230883	0.984711	0.00295512	0.00808775	0.00193709
comp2265087_c0_seq2	5	0.272651	0.27638	0.0276868	0.12315	0.300132
comp2265108_c0_seq2	2	0.000115426	0.99902	0.000126366	0.000616164	0.000121761
comp2265181_c0_seq1	5	0.0417914	0.00572442	0.0072629	0.0218996	0.923322
comp2265234_c1_seq1	3	1.17033e-05	8.4032e-06	0.999966	7.79701e-06	5.73929e-06
comp2265254_c0_seq1	2	0.0258252	0.597158	0.0101095	0.301493	0.0654142
comp2265381_c0_seq1	2	0.000113332	0.999175	0.000116122	0.000480978	0.000114443
comp2265586_c0_seq1	2	0.00683928	0.936797	0.00447237	0.0437768	0.00811493
comp2265682_c0_seq1	2	8.98134e-06	0.999932	9.40972e-06	4.01292e-05	9.70486e-06
comp2265751_c0_seq4	3	0.0392166	0.216493	0.671415	0.0517815	0.0210942
comp2265777_c0_seq1	3	0.271054	0.0375584	0.443437	0.0633241	0.184627
comp2265813_c0_seq2	3	2.25435e-05	1.50643e-05	0.999935	1.56666e-05	1.16694e-05
comp2265890_c0_seq1	1	0.995141	0.000659231	0.000770258	0.000630477	0.00279926
comp2265947_c0_seq1	2	0.0315364	0.584687	0.0154033	0.253105	0.115268
comp2266053_c0_seq1	5	0.0817133	0.0606846	0.0127307	0.146957	0.697914
comp2266084_c0_seq1	4	0.00693894	0.031285	0.0080889	0.92285	0.0308376
comp2266159_c0_seq6	1	0.99786	0.000241415	0.000256976	0.00028707	0.00135409
comp2266255_c0_seq1	2	1.45332e-05	0.999898	1.42055e-05	5.77307e-05	1.59479e-05
comp2266263_c0_seq1	3	0.000215166	0.000138049	0.999393	0.000147289	0.000106991
comp2266360_c0_seq2	2	0.0021997	0.986351	0.00379401	0.00578783	0.00186776
comp2266367_c0_seq1	5	0.103849	0.301516	0.024745	0.174076	0.395814
comp2266421_c1_seq2	1	0.975176	0.00159046	0.0018265	0.00221912	0.0191884
comp2266698_c0_seq2	5	0.265645	0.239314	0.0233762	0.196215	0.27545
comp2266754_c1_seq3	4	0.00918095	0.128834	0.0163127	0.82592	0.0197528
comp2266755_c0_seq1	5	0.0254388	0.016275	0.00814466	0.0486484	0.901493
comp2266791_c0_seq6	3	0.000239557	0.000178042	0.999308	0.000153615	0.000121171
comp2266844_c0_seq4	2	0.000397483	0.997174	0.000479111	0.00159075	0.000358265
comp2266918_c0_seq2	2	6.23266e-06	0.999949	6.03274e-06	3.16695e-05	7.45071e-06
comp2266941_c0_seq2	2	0.000181076	0.998862	0.000165474	0.000591862	0.000199962
comp2266986_c0_seq3	5	0.106068	0.0292163	0.0343921	0.0608815	0.769442
comp2267040_c0_seq2	2	0.00880412	0.591463	0.00838566	0.374304	0.0170425
comp2267077_c0_seq2	5	0.187252	0.0194244	0.0235742	0.0907639	0.678985
comp2267127_c0_seq1	2	0.00944059	0.67248	0.0080635	0.294048	0.0159675
comp2267160_c0_seq2	3	2.55245e-05	1.79711e-05	0.999928	1.61869e-05	1.2311e-05
comp2267209_c0_seq1	1	0.517378	0.02428	0.300923	0.0494179	0.108001
comp2267246_c0_seq1	5	0.182687	0.0752238	0.0153654	0.109896	0.616829
comp2267256_c0_seq2	1	0.992837	0.000805991	0.000953275	0.000801283	0.0046027
comp2267287_c0_seq12	2	0.0002927	0.998085	0.000291402	0.00099627	0.000334822
comp2267297_c0_seq4	2	0.000171202	0.998871	0.000168217	0.00059942	0.000189815
comp2267365_c0_seq1	1	0.974455	0.00410438	0.00292567	0.00379355	0.0147216
comp2267375_c0_seq3	3	0.00127852	0.00148107	0.995671	0.00095756	0.000611804
comp2267420_c0_seq2	1	0.823088	0.0152321	0.120302	0.0141275	0.0272501
comp2267488_c0_seq1	4	0.00455996	0.0391861	0.00635466	0.938835	0.0110647
comp2267530_c0_seq1	2	0.00482063	0.940883	0.00336079	0.0430309	0.0079044
comp2267587_c1_seq3	2	0.000236374	0.998404	0.000273199	0.000830028	0.000256887
comp2267649_c0_seq1	2	0.0420827	0.835479	0.0108186	0.0749061	0.036714
comp2267649_c1_seq1	5	0.0581293	0.0480795	0.0102922	0.110717	0.772782
comp2267686_c0_seq1	2	0.000776295	0.994207	0.000692683	0.00356886	0.000754932
comp2267783_c2_seq1	3	0.0010979	0.00133537	0.995959	0.00100825	0.000599846
comp2267836_c0_seq1	4	0.044314	0.282094	0.013072	0.460439	0.200081
comp2267850_c0_seq1	3	1.29203e-05	8.77638e-06	0.999963	8.6272e-06	6.57918e-06
comp2267870_c0_seq2	1	0.98924	0.00146807	0.00398062	0.00146462	0.00384626
comp2267939_c0_seq1	2	0.000240635	0.997279	0.000250737	0.0019259	0.000303457
comp2267940_c1_seq3	1	0.998306	0.000194801	0.00021343	0.00023416	0.00105192
comp2268029_c2_seq11	3	0.000812785	0.000740595	0.997437	0.000565893	0.000443838
comp2268100_c0_seq1	3	1.07983e-05	7.6821e-06	0.999969	7.11751e-06	5.27562e-06
comp2268154_c0_seq1	1	0.997169	0.000308935	0.000358325	0.000385626	0.00177843
comp2268232_c0_seq1	5	0.0928941	0.160731	0.017642	0.172601	0.556131
comp2268263_c2_seq3	2	0.000795748	0.994701	0.000783274	0.00274779	0.00097244
comp2268295_c0_seq2	2	0.00239288	0.983686	0.00265415	0.00826874	0.00299827
comp2268323_c0_seq1	1	0.999042	0.000118603	0.00016246	0.000141011	0.000535866
comp2268383_c0_seq1	2	0.000737244	0.994995	0.00102604	0.00259843	0.000642911
comp2268475_c0_seq2	4	0.0658438	0.288476	0.0180389	0.379977	0.247665
comp2268497_c0_seq1	5	0.0211495	0.0164914	0.00658732	0.0693364	0.886435
comp2268551_c0_seq2	1	0.996791	0.000342903	0.00038784	0.00042438	0.00205379
comp2268577_c0_seq9	4	0.0855552	0.115067	0.0227997	0.513908	0.26267
comp2268738_c0_seq1	3	0.000440549	0.000352517	0.99876	0.00026178	0.000184777
comp2268843_c0_seq1	2	1.40787e-05	0.99989	1.49242e-05	6.55289e-05	1.59263e-05
comp2268977_c0_seq1	3	0.00288594	0.00345148	0.99047	0.00191229	0.00128035
comp2268991_c0_seq1	4	0.00116062	0.0046419	0.00117266	0.989153	0.00387227
comp2269064_c0_seq7	2	0.00105454	0.99352	0.00148939	0.00307958	0.000856978
comp2269107_c0_seq1	4	0.00151514	0.00808122	0.00185748	0.984138	0.00440792
comp2269168_c0_seq1	1	0.996729	0.000501972	0.000576861	0.000497809	0.00169456
comp2269225_c0_seq5	2	0.00144934	0.99088	0.00222612	0.00419307	0.0012516
comp2269263_c0_seq2	3	0.00117957	0.000473965	0.997271	0.000582073	0.000493775
comp2269324_c0_seq1	2	0.000635151	0.995479	0.000946722	0.00235038	0.0005888
comp2269406_c0_seq1	1	0.994641	0.000704859	0.000674915	0.000811115	0.00316856
comp2269443_c0_seq1	4	0.0168828	0.0183075	0.0177463	0.85468	0.0923838
comp2269458_c0_seq2	2	4.05214e-05	0.999704	4.60034e-05	0.000165136	4.42962e-05
comp2269538_c0_seq1	1	0.999169	0.000106595	0.000174156	0.000122547	0.000428068
comp2269552_c0_seq1	3	0.00609929	0.0061653	0.97786	0.00640065	0.00347431
comp2269571_c0_seq2	1	0.996809	0.000381559	0.000923464	0.000427926	0.00145784
comp2269616_c0_seq2	2	1.06583e-05	0.999927	1.02574e-05	4.11476e-05	1.13877e-05
comp2269662_c0_seq8	3	0.0103651	0.0221953	0.952191	0.0101147	0.00513436
comp2269799_c0_seq4	3	0.0229451	0.01117	0.930487	0.0206277	0.0147703
comp2269823_c0_seq1	3	5.55043e-05	4.16047e-05	0.999841	3.52108e-05	2.61897e-05
comp2269871_c0_seq1	4	0.0117496	0.0151144	0.0123821	0.911156	0.0495976
comp2269922_c0_seq1	3	7.48544e-06	5.01266e-06	0.999979	4.75218e-06	3.57718e-06
comp2269946_c0_seq1	5	0.0624875	0.066483	0.0111561	0.12274	0.737134
comp2270003_c0_seq1	2	0.000688861	0.995562	0.00100932	0.00214706	0.00059237
comp2270003_c1_seq1	2	0.000930991	0.994049	0.00140872	0.00282013	0.000791283
comp2270043_c0_seq2	5	0.10149	0.011182	0.0182086	0.0285318	0.840588
comp2270178_c0_seq4	4	0.0013461	0.00519274	0.00123832	0.986702	0.0055212
comp2270224_c0_seq1	5	0.0939113	0.00894574	0.012784	0.0326465	0.851712
comp2270290_c0_seq3	3	3.32365e-05	2.19405e-05	0.999909	2.00851e-05	1.58064e-05
comp2270350_c0_seq2	2	0.011049	0.912706	0.00530093	0.0527952	0.0181493
comp2270416_c1_seq1_contamination	2	0.00117233	0.992611	0.00113581	0.00372273	0.00135814
comp2270447_c0_seq2	3	3.43249e-05	2.3528e-05	0.999907	2.00406e-05	1.5191e-05
comp2270507_c0_seq1	2	0.00256232	0.984487	0.00207433	0.00802775	0.00284833
comp2270548_c0_seq3	3	8.10695e-05	6.68746e-05	0.999744	6.33591e-05	4.43966e-05
comp2270579_c3_seq6	5	0.153866	0.0767972	0.094953	0.0991737	0.575211
comp2270590_c0_seq1	5	0.0570824	0.0333188	0.00838088	0.197965	0.703253
comp2270639_c0_seq2	1	0.999604	4.98931e-05	7.46555e-05	5.4735e-05	0.000216369
comp2270717_c0_seq1	1	0.97969	0.00218366	0.00242019	0.00226186	0.0134439
comp2270743_c0_seq1	2	0.00416298	0.9743	0.0045165	0.0119347	0.00508564
comp2270769_c1_seq1	3	0.016509	0.00569311	0.96068	0.00889918	0.00821833
comp2270871_c0_seq1	5	0.0352798	0.00729285	0.00785313	0.0611889	0.888385
comp2270884_c0_seq1	5	0.0859368	0.00689504	0.00979383	0.0377811	0.859593
comp2270896_c0_seq2	5	0.116748	0.0717775	0.0145733	0.0834388	0.713462
comp2270981_c1_seq5	2	2.3617e-05	0.999819	2.35671e-05	0.000106781	2.75279e-05
comp2270985_c1_seq1	5	0.104856	0.0273458	0.0731216	0.110015	0.684661
comp2271063_c0_seq8	4	0.00189558	0.0190591	0.00197154	0.97126	0.0058141
comp2271221_c0_seq2	3	1.83425e-05	1.2762e-05	0.999949	1.16405e-05	8.54829e-06
comp2271245_c0_seq10	4	0.0965229	0.0711546	0.0573859	0.590298	0.184639
comp2271267_c1_seq4	4	0.0382253	0.0836154	0.0120532	0.48872	0.377387
comp2271279_c0_seq2	3	0.00075395	0.00075391	0.997596	0.00054087	0.000355111
comp2271325_c1_seq2	2	0.000464059	0.997124	0.000566123	0.00145422	0.000391773
comp2271384_c0_seq4	2	0.000957596	0.992659	0.00159559	0.0039123	0.000875084
comp2271425_c0_seq4	5	0.0407938	0.0655058	0.0162842	0.232919	0.644497
comp2271544_c0_seq1	2	0.0289501	0.455397	0.0162976	0.432773	0.0665822
comp2271654_c0_seq4	2	0.0305132	0.736385	0.0146962	0.166367	0.0520393
comp2271698_c0_seq2	3	0.173904	0.0349036	0.62058	0.0824959	0.0881164
comp2271737_c1_seq2	5	0.215044	0.0152914	0.0218668	0.030828	0.71697
comp2271738_c0_seq4	3	7.2944e-06	4.89526e-06	0.99998	4.65593e-06	3.56008e-06
comp2272046_c0_seq8	1	0.368236	0.168717	0.0213727	0.110887	0.330788
comp2272055_c0_seq3	5	0.231017	0.0804533	0.0168967	0.133099	0.538534
comp2272087_c1_seq4	5	0.0857119	0.0527627	0.0123116	0.19121	0.658003
comp2272151_c0_seq6	1	0.984517	0.00146891	0.00329994	0.0018405	0.00887348
comp2272191_c0_seq3	2	0.000242308	0.997488	0.000255794	0.00170763	0.000306532
comp2272270_c0_seq1	2	1.16391e-05	0.999919	1.15054e-05	4.50792e-05	1.23421e-05
comp2272293_c0_seq1	5	0.0278322	0.0326796	0.00719449	0.376748	0.555546
comp2272365_c0_seq2	2	0.00124524	0.986931	0.000929819	0.00910999	0.00178357
comp2272373_c0_seq1	2	0.000953448	0.99367	0.00103903	0.00323017	0.00110734
comp2272384_c0_seq1	4	0.00441873	0.0171794	0.00636707	0.95561	0.0164244
comp2272428_c0_seq1	3	0.0009328	0.0010857	0.996702	0.000786483	0.000492709
comp2272437_c1_seq1	5	0.12826	0.0299183	0.033959	0.0502132	0.75765
comp2272443_c0_seq5	2	0.000423386	0.994552	0.00040415	0.00403855	0.00058188
comp2272490_c0_seq11	4	0.0068127	0.0493281	0.0043733	0.922646	0.0168395
comp2272494_c0_seq1	5	0.0904981	0.019591	0.0458017	0.0620021	0.782107
comp2272523_c0_seq2	5	0.0366978	0.0123405	0.00701806	0.173912	0.770032
comp2272645_c0_seq1	5	0.0585209	0.00970751	0.0108868	0.0632957	0.857589
comp2272663_c0_seq3	1	0.985958	0.00169174	0.00159883	0.00163957	0.00911151
comp2272740_c0_seq1	1	0.988453	0.00169663	0.00140418	0.00151817	0.00692759
comp2272758_c0_seq3	1	0.987446	0.00223504	0.00391658	0.00166195	0.00474064
comp2272851_c0_seq1	2	0.00371489	0.964888	0.00394063	0.0206999	0.00675655
comp2272898_c0_seq2	3	0.318455	0.0268281	0.535304	0.0521117	0.067301
comp2273016_c0_seq4	4	0.00956719	0.0128577	0.0101023	0.926058	0.0414152
comp2273029_c0_seq1	4	0.0142611	0.0798946	0.00596544	0.833403	0.0664756
comp2273079_c2_seq2	2	0.0458642	0.526867	0.250788	0.142402	0.0340791
comp2273132_c0_seq2	2	0.000418894	0.997339	0.000571117	0.00129416	0.000376743
comp2273152_c0_seq2	2	0.00712064	0.952043	0.016993	0.018665	0.00517885
comp2273155_c0_seq6	5	0.0830143	0.215787	0.0236323	0.22505	0.452516
comp2273167_c0_seq1	5	0.317426	0.0188285	0.0387735	0.079797	0.545175
comp2273222_c0_seq2	5	0.0810932	0.00788263	0.0101398	0.0342517	0.866633
comp2273377_c0_seq2	4	0.00156244	0.00541937	0.00173239	0.985811	0.00547452
comp2273450_c0_seq2	2	0.0808775	0.410119	0.0428041	0.263643	0.202556
comp2273484_c0_seq3	5	0.0259372	0.00440307	0.00222851	0.0120597	0.955371
comp2273492_c0_seq13	2	0.000155785	0.998366	0.000132526	0.00113682	0.000208557
comp2273515_c0_seq1	5	0.109237	0.0297815	0.0488268	0.117744	0.694411
comp2273524_c0_seq9	5	0.0877363	0.0913776	0.0136399	0.347118	0.460128
comp2273538_c1_seq1	2	0.0183508	0.703389	0.0110314	0.217606	0.0496236
comp2273644_c0_seq2	2	0.00249903	0.982363	0.00154623	0.0110628	0.00252873
comp2273646_c2_seq2	1	0.820587	0.0155266	0.0843477	0.018179	0.0613596
comp2273738_c0_seq7	1	0.988972	0.0013172	0.0039273	0.00149938	0.0042842
comp2273767_c0_seq1	5	0.100013	0.0114524	0.0260948	0.0639608	0.798479
comp2273776_c2_seq5	2	0.00062867	0.995942	0.000678498	0.0020415	0.00070944
comp2273841_c0_seq2	3	0.130172	0.0353225	0.557995	0.14655	0.129961
comp2273842_c1_seq3	3	0.0695439	0.0154367	0.839931	0.0276034	0.0474854
comp2273876_c0_seq8	2	0.00296504	0.981094	0.0054269	0.00807605	0.00243841
comp2273879_c0_seq1	5	0.125255	0.0190127	0.0478689	0.13048	0.677383
comp2273937_c0_seq1	5	0.119133	0.0327676	0.0116264	0.236441	0.600033
comp2273980_c0_seq1	4	0.0012941	0.00427047	0.00135749	0.988051	0.00502725
comp2274041_c1_seq1	2	0.0755588	0.563184	0.0179965	0.267469	0.075792
comp2274074_c0_seq3	1	0.997524	0.000238554	0.000370444	0.000314142	0.00155297
comp2274137_c0_seq1	5	0.054612	0.00756263	0.00865153	0.0214309	0.907743
comp2274137_c1_seq25	5	0.188447	0.0226528	0.0328814	0.0434499	0.712569
comp2274204_c0_seq5	3	0.000426827	0.000178971	0.999033	0.000197064	0.00016429
comp2274336_c0_seq18	2	0.00222012	0.985846	0.00385728	0.00632619	0.00175083
comp2274374_c0_seq4	4	0.012991	0.014946	0.0139201	0.900988	0.0571545
comp2274439_c0_seq36	3	0.00106617	0.00125908	0.996294	0.00085786	0.0005225
comp2274652_c0_seq1	5	0.039101	0.00555496	0.00348146	0.0168776	0.934985
comp2274806_c0_seq1	1	0.488303	0.0220822	0.338295	0.0450679	0.106252
comp2274845_c0_seq12	2	0.00714355	0.942456	0.00636096	0.0333646	0.0106745
comp2274876_c0_seq3	5	0.248263	0.0322349	0.0185552	0.147076	0.553871
comp2275001_c0_seq1	1	0.964374	0.00411911	0.01663	0.00394605	0.0109307
comp2275106_c0_seq3	1	0.996264	0.000416846	0.000429624	0.000510874	0.00237845
comp2275149_c1_seq1	5	0.173049	0.0306467	0.0996868	0.141897	0.554721
comp2275163_c0_seq2	1	0.998607	0.000136166	0.000237012	0.00016877	0.000851338
comp2275163_c1_seq1	1	0.93106	0.00493572	0.00550434	0.00618118	0.0523191
comp2275196_c0_seq2	5	0.0933704	0.0821722	0.012065	0.1546	0.657793
comp2275309_c0_seq2	5	0.0476572	0.0395217	0.00819515	0.173744	0.730882
comp2275437_c0_seq1	2	0.000302631	0.99812	0.000205894	0.00105845	0.000312812
comp2275485_c0_seq1	3	0.205562	0.024928	0.661402	0.0483247	0.0597828
comp2275544_c0_seq2	2	0.0605277	0.52512	0.0149209	0.248612	0.15082
comp2275643_c1_seq4	3	1.27183e-05	7.3063e-06	0.999968	6.92106e-06	5.54831e-06
comp2275865_c0_seq3	1	0.920378	0.00926139	0.0450266	0.00815758	0.0171767
comp2275893_c0_seq1	5	0.103275	0.0107529	0.0125784	0.0312562	0.842138
comp2276073_c0_seq1	2	0.00150012	0.990627	0.00240947	0.00426129	0.00120257
comp2276073_c1_seq1	2	0.00157959	0.989986	0.00259433	0.00456813	0.00127192
comp2276099_c0_seq2	5	0.019589	0.00580113	0.00458876	0.0301732	0.939848
comp2276115_c0_seq1	2	0.00832349	0.663681	0.00796838	0.302553	0.0174735
comp2276134_c0_seq2	1	0.998086	0.000227877	0.000241003	0.000264271	0.00118089
comp2276220_c1_seq6	3	0.188335	0.0388161	0.424143	0.101403	0.247304
comp2276235_c1_seq9	5	0.143768	0.0232592	0.0524767	0.129949	0.650547
comp2276293_c1_seq2	5	0.0888973	0.0131452	0.0246754	0.0671458	0.806136
comp2276314_c0_seq1	2	0.000604104	0.995872	0.000724836	0.00222955	0.000569633
comp2276417_c1_seq3	2	6.27686e-05	0.999593	6.38676e-05	0.00021412	6.65121e-05
comp2276495_c0_seq1	3	0.000377971	0.000361692	0.998783	0.000295813	0.000181448
comp2276495_c1_seq35	3	0.000968018	0.000828827	0.997114	0.000677633	0.000411157
comp2276586_c0_seq3	4	0.00348449	0.0475043	0.00361152	0.936901	0.00849897
comp2276599_c1_seq1	5	0.0307888	0.0132939	0.00440581	0.106926	0.844586
comp2276721_c0_seq4	5	0.0652469	0.00939984	0.00395195	0.0230406	0.898361
comp2276727_c0_seq2	1	0.996523	0.000398494	0.000403822	0.000472346	0.00220205
comp2276830_c0_seq8	1	0.504732	0.0341921	0.194295	0.101246	0.165536
comp2276940_c0_seq2	5	0.305744	0.0150622	0.017813	0.0624808	0.5989
comp2277010_c0_seq2	5	0.0397151	0.0195046	0.00707155	0.0386091	0.8951
comp2277203_c0_seq4	2	0.0012344	0.992113	0.0017514	0.00387094	0.0010307
comp2277336_c1_seq6	1	0.595977	0.0249137	0.292748	0.0263148	0.0600464
comp2277376_c0_seq3	5	0.0323194	0.0105423	0.00353636	0.0315492	0.922053
comp2277490_c0_seq4	5	0.226225	0.12555	0.0196228	0.129438	0.499164
comp2277568_c0_seq5	3	0.419744	0.0208734	0.497746	0.0229713	0.0386654
comp2277837_c0_seq3	5	0.0434569	0.0451332	0.0121291	0.135085	0.764196
comp2277838_c2_seq5	4	0.000905905	0.00505763	0.000816424	0.989612	0.00360766
comp2277995_c0_seq1	5	0.123532	0.00929911	0.0113226	0.0431926	0.812654
comp2278093_c0_seq2	2	0.0171165	0.610862	0.0203612	0.331139	0.0205214
comp2278097_c0_seq3	1	0.997818	0.000242085	0.000276179	0.000285455	0.00137815
comp2278120_c0_seq8	1	0.766867	0.0184935	0.113742	0.0261692	0.0747289
comp2278120_c2_seq1	5	0.0551059	0.0150786	0.0264529	0.081575	0.821788
comp2278165_c1_seq1	3	0.00433095	0.00289314	0.986024	0.00361839	0.00313313
comp2278194_c0_seq1	2	0.00949865	0.922504	0.00606041	0.0454234	0.0165135
comp2278252_c0_seq1	5	0.178089	0.0187519	0.0309539	0.0514736	0.720731
comp2278285_c0_seq4_contamination	2	0.000473803	0.996859	0.000501169	0.0016233	0.000543068
comp2278303_c0_seq3	3	0.000482859	0.000504385	0.998402	0.000373314	0.000237311
comp2278385_c0_seq24	3	0.182878	0.0429306	0.29128	0.193993	0.288918
comp2278420_c1_seq3	3	0.00201449	0.00259244	0.992791	0.00164395	0.000958569
comp2278452_c1_seq5	2	0.00117585	0.992833	0.0012617	0.00342348	0.00130597
comp2278464_c0_seq2	5	0.102255	0.00726425	0.00894789	0.0253216	0.856212
comp2278563_c0_seq1	2	0.00107312	0.99322	0.00118456	0.00330084	0.0012215
comp2278626_c0_seq2	2	9.17084e-05	0.999332	8.88e-05	0.000378145	0.000109382
comp2279271_c0_seq1	1	0.997736	0.000255813	0.000272185	0.000307616	0.0014281
comp2279378_c0_seq1	5	0.0487339	0.0144756	0.0183727	0.106939	0.811479
comp2279447_c0_seq1	2	0.00041437	0.99482	0.000462809	0.00377648	0.000526343
comp2279470_c0_seq1	4	0.0127964	0.0138641	0.0114916	0.893528	0.0683199
comp2279830_c0_seq1_contamination	2	0.000637449	0.994876	0.000609361	0.00300126	0.000876291
comp2279863_c0_seq1	4	0.00929121	0.358464	0.00932748	0.604923	0.0179938
comp2279899_c0_seq1	4	0.0133167	0.0151596	0.0138982	0.895612	0.0620135
comp2279956_c0_seq1	5	0.0332004	0.00967993	0.0125958	0.0625839	0.88194
comp2280031_c0_seq1	1	0.998673	0.000167302	0.00026257	0.000188029	0.000708905
comp2280693_c0_seq1	4	0.158716	0.093892	0.121697	0.359471	0.266224
comp2281004_c0_seq1_contamination	2	0.00414351	0.972546	0.00337897	0.0139705	0.00596112
comp2282468_c0_seq1	1	0.98619	0.00210254	0.00153085	0.00202563	0.00815142
comp2282832_c0_seq1	2	0.0374472	0.768981	0.0371498	0.0997663	0.056656
comp2288568_c0_seq1	2	9.80841e-05	0.99936	9.42359e-05	0.000339274	0.000108195
gi|146189520|emb|AM697674.1|_Platynereis_dumerilii_mRNA_for_hypothetical_protein_(ORF1),_isolate_2	3	0.285995	0.046913	0.290684	0.164536	0.211872
gi|563607183|gb|KF515933.1|_Platynereis_dumerilii_SHM_neuropeptide_precursor,_mRNA,_partial_cds	3	0.176546	0.0529804	0.349713	0.120145	0.300616
gnl|Pdu_trscr_assembly_1|1374	4	0.00951983	0.174506	0.00661049	0.781551	0.0278119
gnl|Pdu_trscr_assembly_1|1470	2	0.0278571	0.485604	0.0127997	0.389214	0.0845251
gnl|Pdu_trscr_assembly_1|159181	4	0.0514019	0.16058	0.051042	0.61486	0.122116
gnl|Pdu_trscr_assembly_1|19656	2	0.0906377	0.382052	0.0199485	0.192858	0.314504
gnl|Pdu_trscr_assembly_1|200732	5	0.141092	0.0148984	0.0194366	0.0304107	0.794162
gnl|Pdu_trscr_assembly_1|212085	2	2.10424e-05	0.999862	2.11715e-05	7.46966e-05	2.12e-05
gnl|Pdu_trscr_assembly_1|219156	5	0.138677	0.0261552	0.0430371	0.0611795	0.730951
gnl|Pdu_trscr_assembly_1|264234	2	1.36652e-05	0.999894	1.30254e-05	6.34851e-05	1.61738e-05
gnl|Pdu_trscr_assembly_1|264488	2	0.000799854	0.99556	0.000981929	0.00203155	0.000626423
gnl|Pdu_trscr_assembly_1|4989	2	0.136178	0.424215	0.0231322	0.197169	0.219305
gnl|Pdu_trscr_assembly_1|5866	5	0.0237135	0.010855	0.00544714	0.0334486	0.926536
gnl|Pdu_trscr_assembly_1|7335	5	0.0416774	0.0119736	0.00415696	0.0289515	0.913241
gnl|Pdu_trscr_assembly_1|88504	3	0.207136	0.036165	0.477368	0.0801032	0.199227

## Sheet: allLunar
	cluster	membership.1	membership.2	membership.3	membership.4
comp1195281_c0_seq2	3	0.182575	0.140027	0.45856	0.218837
comp1408528_c0_seq1	2	0.211226	0.629762	0.0700112	0.0890012
comp1903780_c0_seq1	1	0.553337	0.245207	0.0814728	0.119982
comp1963492_c0_seq2	1	0.465171	0.30281	0.0892518	0.142767
comp2138461_c0_seq1	1	0.306729	0.234992	0.228837	0.229442
comp2142030_c0_seq1	4	0.258632	0.188899	0.254878	0.297591
comp2166111_c0_seq1	2	0.357157	0.390024	0.109077	0.143743
comp2188826_c0_seq1	1	0.364131	0.274113	0.171271	0.190485
gnl_Pdu_trscr_assembly_1_159181	1	0.314649	0.238685	0.22117	0.225496
comp2197726_c1_seq1	4	0.131036	0.110863	0.117564	0.640538
comp2198620_c0_seq1	3	0.0373289	0.0320014	0.878256	0.0524136
comp2201951_c0_seq1	1	0.36534	0.278444	0.172054	0.184161
comp2208315_c0_seq1	3	0.0521177	0.0437721	0.826204	0.0779063
comp2220443_c0_seq2	2	0.252533	0.599536	0.0641529	0.0837775
comp2220733_c0_seq1	2	0.227477	0.631833	0.0592373	0.0814522
comp2235289_c1_seq1	2	0.28129	0.376917	0.13577	0.206024
comp2237921_c0_seq1	2	0.384439	0.408108	0.0856207	0.121833
comp2240117_c2_seq2	3	0.0860952	0.0735885	0.724822	0.115494
comp2242774_c0_seq2	4	0.318112	0.221797	0.114553	0.345538
comp2245060_c0_seq2	1	0.502753	0.304663	0.0737882	0.118795
comp2246178_c0_seq1	3	0.128371	0.116372	0.601364	0.153892
comp2246430_c0_seq1	3	0.0609985	0.0495961	0.805846	0.0835592
comp2246635_c0_seq1	4	0.21336	0.158448	0.303949	0.324243
comp2247432_c0_seq1	4	0.123953	0.103567	0.113635	0.658845
comp2251281_c0_seq2	3	0.160069	0.12159	0.42476	0.293581
comp2253903_c0_seq1	2	0.16109	0.733634	0.0440876	0.061188
comp2254040_c0_seq2	2	0.224371	0.62697	0.0653981	0.0832615
comp2254293_c0_seq3	2	0.28812	0.528516	0.079986	0.103378
comp2254399_c0_seq2	1	0.463119	0.294502	0.10544	0.136939
comp2254399_c1_seq1	1	0.431288	0.321321	0.107871	0.13952
comp2255166_c0_seq2	1	0.458443	0.258105	0.0976623	0.18579
comp2255762_c0_seq2	3	0.0625247	0.0521633	0.794006	0.0913057
comp2256048_c0_seq1	3	0.0650882	0.05259	0.796514	0.0858073
comp2258272_c0_seq1	2	0.277487	0.564466	0.0594122	0.0986345
comp2258476_c0_seq2	4	0.145424	0.113907	0.2226	0.518069
comp2258926_c0_seq3	2	0.258636	0.582798	0.0664801	0.0920857
comp2260220_c0_seq4	2	0.360344	0.374566	0.111222	0.153868
comp2263873_c0_seq9	1	0.32725	0.208627	0.155493	0.30863
comp2263897_c0_seq7	2	0.343066	0.414359	0.103044	0.139531
comp2264237_c0_seq1	4	0.165857	0.11548	0.141958	0.576705
comp2264652_c0_seq2	3	0.0655709	0.0539281	0.767415	0.113086
comp2265395_c0_seq1	2	0.258362	0.476281	0.102762	0.162594
comp2266802_c0_seq7	4	0.210987	0.154825	0.218955	0.415233
comp2267178_c1_seq2	3	0.10072	0.0869641	0.691036	0.121279
comp2267334_c0_seq1	3	0.115389	0.0963316	0.55139	0.23689
comp2267365_c0_seq1	4	0.135773	0.114818	0.121406	0.628003
comp2267733_c0_seq1	2	0.317731	0.388778	0.113104	0.180387
comp2268067_c0_seq1	3	0.0604447	0.0487287	0.799602	0.0912248
comp2268190_c1_seq4	1	0.408034	0.263201	0.134502	0.194262
comp2269061_c0_seq1	3	0.0712283	0.061086	0.776938	0.0907481
comp2269180_c0_seq3	3	0.0322355	0.026746	0.89276	0.0482584
comp2272226_c1_seq1	2	0.257996	0.606003	0.0578356	0.0781659
comp2273146_c0_seq2	3	0.126852	0.117526	0.594974	0.160648
comp2273570_c0_seq3	3	0.124715	0.100152	0.553847	0.221286
comp2273750_c0_seq2	3	0.066327	0.0579969	0.775402	0.100274
comp2274417_c0_seq2	3	0.148819	0.120292	0.474025	0.256864
gnl_Pdu_trscr_assembly_1_7217	3	0.135332	0.113941	0.564875	0.185851
comp2276727_c0_seq2	4	0.134308	0.114949	0.123536	0.627207
comp2277009_c0_seq3	3	0.0741357	0.0618626	0.770859	0.0931422
comp2277216_c1_seq2	2	0.196097	0.661576	0.0596933	0.0826337
comp2280693_c0_seq1	1	0.294612	0.221215	0.223373	0.260799
comp2282832_c0_seq1	3	0.114622	0.102637	0.639702	0.143039
comp2253656_c0_seq3	2	0.169129	0.736283	0.0385611	0.056027
