# Supplementary material for: Combined transcriptome and proteome profiling reveals specific molecular brain signatures for sex, maturation and circalunar clock phase
Source: eLife. 2019 Feb 15;8:e41556. doi: 10.7554/eLife.41556 (PMC6377233; doi:10.7554/eLife.41556)
Supplement: Figure 3—source data 8. — Table containing the results of the GO-term analysis on transcript level. Individual GO-terms are shown with their respective p-values in each of the three comparisons made (maturation, sex, and lunar), as well as their ontolgy, i.e. Molecular Function, Biological Process, or Cellular Compartment. [file elife-41556-fig3-data8.xlsx]

## Sheet: allGO-Terms OVER
frame.go_id	Term	Pvalue_Mat	Pvalue_Sex	Pvalue_Lun	ontology
GO:0000178	exosome (RNase complex)	0.00522913	1	1	CC
GO:0000502	proteasome complex	1	0.039238	1	CC
GO:0000775	chromosome, centromeric region	1	0.0035695	1	CC
GO:0000915	actomyosin contractile ring assembly	1	0.0171482	1	BP
GO:0001578	microtubule bundle formation	1	0.00419024	1	BP
GO:0001614	purinergic nucleotide receptor activity	1	0.00121623	1	MF
GO:0003333	amino acid transmembrane transport	0.00678678	1	1	BP
GO:0003684	damaged DNA binding	0.00203216	1	1	MF
GO:0003707	steroid hormone receptor activity	0.00853162	1	1	MF
GO:0003810	protein-glutamine gamma-glutamyltransferase activity	0.0128488	1	1	MF
GO:0003824	catalytic activity	1	0.0372044	1	MF
GO:0003950	NAD+ ADP-ribosyltransferase activity	0.0140197	1	1	MF
GO:0003978	UDP-glucose 4-epimerase activity	1	0.04627	1	MF
GO:0004013	adenosylhomocysteinase activity	0.0439607	1	1	MF
GO:0004044	amidophosphoribosyltransferase activity	1	0.0156665	1	MF
GO:0004064	arylesterase activity	1	0.04627	1	MF
GO:0004126	cytidine deaminase activity	1	0.0156665	1	MF
GO:0004129	cytochrome-c oxidase activity	1	0.0498328	1	MF
GO:0004175	endopeptidase activity	1	0.0302737	1	MF
GO:0004197	cysteine-type endopeptidase activity	0.0426789	1	1	MF
GO:0004198	calcium-dependent cysteine-type endopeptidase activity	0.00993883	0.00533371	1	MF
GO:0004332	fructose-bisphosphate aldolase activity	1	0.0310886	1	MF
GO:0004415	hyalurononglucosaminidase activity	1	0.0310886	1	MF
GO:0004448	isocitrate dehydrogenase activity	0.0313033	1	1	MF
GO:0004467	long-chain fatty acid-CoA ligase activity	0.0133688	1	1	MF
GO:0004497	monooxygenase activity	0.0384076	1	1	MF
GO:0004499	N,N-dimethylaniline monooxygenase activity	0.00761077	1	1	MF
GO:0004639	phosphoribosylaminoimidazolesuccinocarboxamide synthase activity	1	0.0156665	1	MF
GO:0004672	protein kinase activity	1	1	0.0371716	MF
GO:0004725	protein tyrosine phosphatase activity	0.00225607	1	1	MF
GO:0004803	transposase activity	1	1	0.0213052	MF
GO:0004931	extracellularly ATP-gated cation channel activity	1	0.00121623	1	MF
GO:0005044	scavenger receptor activity	0.0177513	1	1	MF
GO:0005158	insulin receptor binding	1	1	0.0071485	MF
GO:0005201	extracellular matrix structural constituent	0.0199682	0.0253824	1	MF
GO:0005215	transporter activity	1	0.0157888	1	MF
GO:0005230	extracellular ligand-gated ion channel activity	0.000361277	0.032577	1	MF
GO:0005328	neurotransmitter:sodium symporter activity	0.0456828	1	1	MF
GO:0005342	organic acid transmembrane transporter activity	0.00497604	1	1	MF
GO:0005452	inorganic anion exchanger activity	0.000268161	1	1	MF
GO:0005506	iron ion binding	0.000692194	1	1	MF
GO:0005507	copper ion binding	0.00343634	1	1	MF
GO:0005509	calcium ion binding	3.19e-07	0.00583446	1	MF
GO:0005515	protein binding	2.05e-21	1	1	MF
GO:0005581	collagen trimer	1	0.0101965	1	CC
GO:0005634	nucleus	0.0115778	1	1	CC
GO:0005635	nuclear envelope	0.0313609	1	1	CC
GO:0005730	nucleolus	0.0227205	1	1	CC
GO:0005847	mRNA cleavage and polyadenylation specificity factor complex	0.0168822	1	1	CC
GO:0005852	eukaryotic translation initiation factor 3 complex	0.0462299	1	1	CC
GO:0005921	gap junction	1	1	0.0134972	CC
GO:0005960	glycine cleavage complex	1	0.0199442	1	CC
GO:0005978	glycogen biosynthetic process	0.043407	1	1	BP
GO:0006091	generation of precursor metabolites and energy	1	0.0225568	1	BP
GO:0006144	purine nucleobase metabolic process	1	0.00419024	1	BP
GO:0006147	guanine catabolic process	1	0.0171482	1	BP
GO:0006213	pyrimidine nucleoside metabolic process	1	0.0265107	1	BP
GO:0006260	DNA replication	1	0.00893541	1	BP
GO:0006270	DNA replication initiation	1	0.00161355	1	BP
GO:0006313	transposition, DNA-mediated	1	1	0.0230526	BP
GO:0006333	chromatin assembly or disassembly	1	0.0068154	1	BP
GO:0006334	nucleosome assembly	1	0.0052481	1	BP
GO:0006378	mRNA polyadenylation	0.00311333	1	1	BP
GO:0006396	RNA processing	0.000795263	1	1	BP
GO:0006468	protein phosphorylation	1	1	0.0345311	BP
GO:0006470	protein dephosphorylation	0.00286174	1	1	BP
GO:0006471	protein ADP-ribosylation	0.0307985	1	1	BP
GO:0006508	proteolysis	1	0.0112381	1	BP
GO:0006536	glutamate metabolic process	0.0131867	1	1	BP
GO:0006597	spermine biosynthetic process	0.0131867	1	1	BP
GO:0006629	lipid metabolic process	0.0302579	1	1	BP
GO:0006643	membrane lipid metabolic process	0.0306047	1	1	BP
GO:0006664	glycolipid metabolic process	0.040349	1	1	BP
GO:0006672	ceramide metabolic process	0.00742541	1	1	BP
GO:0006779	porphyrin-containing compound biosynthetic process	0.0307985	1	1	BP
GO:0006811	ion transport	3.74e-05	1	1	BP
GO:0006820	anion transport	0.00461093	1	1	BP
GO:0006836	neurotransmitter transport	0.0278001	1	1	BP
GO:0006884	cell volume homeostasis	1	0.0340041	1	BP
GO:0006885	regulation of pH	0.043407	1	1	BP
GO:0006955	immune response	0.00922548	1	1	BP
GO:0006996	organelle organization	1	0.033425	1	BP
GO:0007015	actin filament organization	0.0466154	1	1	BP
GO:0007034	vacuolar transport	0.0148718	1	1	BP
GO:0007049	cell cycle	1	0.0190353	1	BP
GO:0007076	mitotic chromosome condensation	0.00997626	1	1	BP
GO:0007154	cell communication	0.00516621	1	1	BP
GO:0007155	cell adhesion	0.0472488	1	1	BP
GO:0007160	cell-matrix adhesion	0.00169325	1	0.0181523	BP
GO:0008083	growth factor activity	0.00866686	1	1	MF
GO:0008233	peptidase activity	1	0.00628683	1	MF
GO:0008234	cysteine-type peptidase activity	1	0.0195842	1	MF
GO:0008289	lipid binding	0.0117794	1	1	MF
GO:0008308	voltage-gated anion channel activity	0.0397081	1	1	MF
GO:0008324	cation transmembrane transporter activity	1	0.0323121	1	MF
GO:0008509	anion transmembrane transporter activity	0.000170105	1	1	MF
GO:0008514	organic anion transmembrane transporter activity	0.0305762	1	1	MF
GO:0008540	proteasome regulatory particle, base subcomplex	1	0.0394944	1	CC
GO:0008892	guanine deaminase activity	1	0.0156665	1	MF
GO:0009063	cellular amino acid catabolic process	0.0431921	1	1	BP
GO:0009117	nucleotide metabolic process	1	0.0186084	0.0199196	BP
GO:0009124	nucleoside monophosphate biosynthetic process	1	0.0447278	1	BP
GO:0009164	nucleoside catabolic process	1	0.0171482	1	BP
GO:0009190	cyclic nucleotide biosynthetic process	1	0.0379978	0.00158566	BP
GO:0009605	response to external stimulus	1	0.0415748	1	BP
GO:0009719	response to endogenous stimulus	0.0357556	1	1	BP
GO:0009972	cytidine deamination	1	0.0171482	1	BP
GO:0010243	response to organonitrogen compound	1	0.00282143	1	BP
GO:0010256	endomembrane system organization	0.0421889	1	1	BP
GO:0010506	regulation of autophagy	0.043407	1	1	BP
GO:0010997	anaphase-promoting complex binding	1	0.0310886	1	MF
GO:0014070	response to organic cyclic compound	1	0.0379978	1	BP
GO:0015085	calcium ion transmembrane transporter activity	0.0451718	1	1	MF
GO:0015108	chloride transmembrane transporter activity	0.0430851	1	1	MF
GO:0015171	amino acid transmembrane transporter activity	0.00338437	1	1	MF
GO:0015276	ligand-gated ion channel activity	0.0307149	1	1	MF
GO:0015278	calcium-release channel activity	0.0133688	1	1	MF
GO:0015291	secondary active transmembrane transporter activity	0.0411251	1	1	MF
GO:0015294	solute:cation symporter activity	0.0499683	1	1	MF
GO:0015318	inorganic molecular entity transmembrane transporter activity	7.45e-06	0.045635	1	MF
GO:0015321	sodium-dependent phosphate transmembrane transporter activity	0.0439607	1	1	MF
GO:0015385	sodium:proton antiporter activity	0.0439607	1	1	MF
GO:0015711	organic anion transport	0.0438279	1	1	BP
GO:0016020	membrane	0.0120043	1	1	CC
GO:0016021	integral component of membrane	0.00157714	1	1	CC
GO:0016054	organic acid catabolic process	0.0129834	1	1	BP
GO:0016072	rRNA metabolic process	0.0213529	1	1	BP
GO:0016180	snRNA processing	0.0126275	1	1	BP
GO:0016301	kinase activity	0.0192556	1	1	MF
GO:0016614	oxidoreductase activity, acting on CH-OH group of donors	0.00300734	1	1	MF
GO:0016675	oxidoreductase activity, acting on a heme group of donors	1	0.0498328	1	MF
GO:0016705	oxidoreductase activity, acting on paired donors, with incorporation or reduction of molecular oxygen	1.46e-06	1	1	MF
GO:0016791	phosphatase activity	0.000988307	1	1	MF
GO:0016801	hydrolase activity, acting on ether bonds	0.0439607	1	1	MF
GO:0016810	hydrolase activity, acting on carbon-nitrogen (but not peptide) bonds	0.037771	0.0260387	1	MF
GO:0016813	hydrolase activity, acting on carbon-nitrogen (but not peptide) bonds, in linear amidines	1	0.04627	1	MF
GO:0016829	lyase activity	0.041743	1	1	MF
GO:0016849	phosphorus-oxygen lyase activity	1	0.0288044	0.00152197	MF
GO:0016878	acid-thiol ligase activity	0.0128488	1	1	MF
GO:0017156	calcium ion regulated exocytosis	0.043407	1	1	BP
GO:0018149	peptide cross-linking	0.0126275	1	1	BP
GO:0019205	nucleobase-containing compound kinase activity	0.0237426	1	1	MF
GO:0019238	cyclohydrolase activity	0.0439607	1	1	MF
GO:0019464	glycine decarboxylation via glycine cleavage system	1	0.0171482	1	BP
GO:0019637	organophosphate metabolic process	1	1	0.0350577	BP
GO:0019899	enzyme binding	0.0353801	1	1	MF
GO:0020037	heme binding	1.83e-05	1	1	MF
GO:0022607	cellular component assembly	1	0.000616223	1	BP
GO:0022803	passive transmembrane transporter activity	0.000215295	1	1	MF
GO:0022834	ligand-gated channel activity	1	0.038244	1	MF
GO:0022838	substrate-specific channel activity	0.000115316	1	1	MF
GO:0022839	ion gated channel activity	0.0255076	0.0250473	1	MF
GO:0022857	transmembrane transporter activity	0.0204871	1	1	MF
GO:0022904	respiratory electron transport chain	1	0.0496004	1	BP
GO:0023052	signaling	0.00274761	1	1	BP
GO:0030054	cell junction	1	1	0.0198014	CC
GO:0030317	flagellated sperm motility	1	0.0340041	1	BP
GO:0030866	cortical actin cytoskeleton organization	1	0.0171482	1	BP
GO:0031012	extracellular matrix	0.0329555	1	1	CC
GO:0031123	RNA 3'-end processing	0.000968218	1	1	BP
GO:0031398	positive regulation of protein ubiquitination	1	0.0340041	1	BP
GO:0031406	carboxylic acid binding	0.00338437	1	1	MF
GO:0031409	pigment binding	0.0133688	1	1	MF
GO:0031667	response to nutrient levels	1	0.00156844	1	BP
GO:0031932	TORC2 complex	1	0.0394944	1	CC
GO:0032040	small-subunit processome	0.0303965	1	1	CC
GO:0032506	cytokinetic process	1	0.0171482	1	BP
GO:0032870	cellular response to hormone stimulus	0.00343091	1	1	BP
GO:0032981	mitochondrial respiratory chain complex I assembly	1	0.0171482	1	BP
GO:0033013	tetrapyrrole metabolic process	0.0289848	1	1	BP
GO:0033198	response to ATP	1	0.00156844	1	BP
GO:0034080	CENP-A containing nucleosome assembly	1	0.0171482	1	BP
GO:0034622	cellular protein-containing complex assembly	1	0.00127318	1	BP
GO:0034709	methylosome	1	0.0394944	1	CC
GO:0034715	pICln-Sm protein complex	1	0.0394944	1	CC
GO:0035435	phosphate ion transmembrane transport	0.0126275	1	1	BP
GO:0035556	intracellular signal transduction	0.017425	1	1	BP
GO:0036157	outer dynein arm	1	0.0394944	1	CC
GO:0036158	outer dynein arm assembly	1	0.0340041	1	BP
GO:0036211	protein modification process	0.00749409	1	1	BP
GO:0042073	intraciliary transport	0.043407	1	1	BP
GO:0042135	neurotransmitter catabolic process	0.043407	1	1	BP
GO:0042162	telomeric DNA binding	0.0439607	1	1	MF
GO:0042555	MCM complex	1	0.00148601	1	CC
GO:0043248	proteasome assembly	1	1	0.00580731	BP
GO:0043401	steroid hormone mediated signaling pathway	0.00264023	1	1	BP
GO:0043546	molybdopterin cofactor binding	0.0133688	0.04627	1	MF
GO:0044282	small molecule catabolic process	1	0.0328069	1	BP
GO:0044341	sodium-dependent phosphate transport	0.043407	1	1	BP
GO:0044427	chromosomal part	1	0.0468336	1	CC
GO:0044456	synapse part	0.00828241	1	1	CC
GO:0045211	postsynaptic membrane	0.00286397	1	1	CC
GO:0046039	GTP metabolic process	0.0421889	1	1	BP
GO:0046087	cytidine metabolic process	1	0.0171482	1	BP
GO:0046113	nucleobase catabolic process	1	0.0171482	1	BP
GO:0046133	pyrimidine ribonucleoside catabolic process	1	0.0171482	1	BP
GO:0046185	aldehyde catabolic process	0.043407	1	1	BP
GO:0046700	heterocycle catabolic process	0.0390146	1	1	BP
GO:0046873	metal ion transmembrane transporter activity	0.0135211	1	1	MF
GO:0048545	response to steroid hormone	0.00264023	1	1	BP
GO:0048878	chemical homeostasis	0.040349	1	1	BP
GO:0050660	flavin adenine dinucleotide binding	0.0230714	1	1	MF
GO:0051015	actin filament binding	0.0014449	1	1	MF
GO:0051234	establishment of localization	5.84e-07	1	1	BP
GO:0051301	cell division	1	0.0335806	1	BP
GO:0051438	regulation of ubiquitin-protein transferase activity	1	0.0340041	1	BP
GO:0051537	2 iron, 2 sulfur cluster binding	0.00173561	1	1	MF
GO:0051640	organelle localization	1	0.0496004	1	BP
GO:0051716	cellular response to stimulus	0.0194993	1	1	BP
GO:0055080	cation homeostasis	0.0121977	1	1	BP
GO:0055085	transmembrane transport	7.79e-07	0.00247381	1	BP
GO:0055086	nucleobase-containing small molecule metabolic process	1	0.0131087	0.0297773	BP
GO:0055114	oxidation-reduction process	0.000151497	1	1	BP
GO:0060070	canonical Wnt signaling pathway	0.0389733	1	1	BP
GO:0061919	process utilizing autophagic mechanism	0.0200614	1	1	BP
GO:0070647	protein modification by small protein conjugation or removal	0.036048	1	1	BP
GO:0070838	divalent metal ion transport	0.0427633	1	1	BP
GO:0070887	cellular response to chemical stimulus	0.0348801	1	1	BP
GO:0071396	cellular response to lipid	0.00264023	1	1	BP
GO:0071407	cellular response to organic cyclic compound	0.00343091	1	1	BP
GO:0071824	protein-DNA complex subunit organization	1	0.00141715	1	BP
GO:0072523	purine-containing compound catabolic process	1	0.0171482	1	BP
GO:0072529	pyrimidine-containing compound catabolic process	1	0.0171482	1	BP
GO:0090407	organophosphate biosynthetic process	1	0.0320536	1	BP
GO:0097027	ubiquitin-protein transferase activator activity	1	0.0310886	1	MF
GO:0098590	plasma membrane region	0.00414984	1	1	CC
GO:0098655	cation transmembrane transport	1	0.0392387	1	BP
GO:0098656	anion transmembrane transport	0.00335415	1	1	BP
GO:0098771	inorganic ion homeostasis	0.0121977	1	1	BP
GO:0140096	catalytic activity, acting on a protein	0.0476205	1	1	MF
GO:1901293	nucleoside phosphate biosynthetic process	1	1	0.0126204	BP
GO:1901361	organic cyclic compound catabolic process	0.0310092	1	1	BP
GO:1901565	organonitrogen compound catabolic process	1	0.03582	1	BP
GO:1901606	alpha-amino acid catabolic process	0.040349	0.0496004	1	BP
GO:1902298	cell cycle DNA replication maintenance of fidelity	1	0.0340041	1	BP
GO:1903320	regulation of protein modification by small protein conjugation or removal	1	0.0340041	1	BP
GO:1903825	organic acid transmembrane transport	0.0182682	1	1	BP
GO:1904668	positive regulation of ubiquitin protein ligase activity	1	0.0340041	1	BP
GO:1990426	mitotic recombination-dependent replication fork processing	1	0.0340041	1	BP

## Sheet: allGO-Terms under
frame.go_id	Term	Pvalue_Mat	Pvalue_Sex	Pvalue_Lun	ontology
GO:0000150	recombinase activity	0.0224616	1	1	MF
GO:0000166	nucleotide binding	0.0206456	1	1	MF
GO:0000270	peptidoglycan metabolic process	0.00018183	1	1	BP
GO:0000502	proteasome complex	0.000172754	1	1	CC
GO:0000990	transcription factor activity, core RNA polymerase binding	0.00146018	1	1	MF
GO:0000996	promoter selection factor activity	0.00146018	1	1	MF
GO:0003676	nucleic acid binding	1.34e-22	0.000216418	1	MF
GO:0003677	DNA binding	2.65e-21	1	1	MF
GO:0003678	DNA helicase activity	8.61e-08	1	1	MF
GO:0003697	single-stranded DNA binding	4.21e-05	1	1	MF
GO:0003723	RNA binding	1	0.00505055	1	MF
GO:0003724	RNA helicase activity	0.0017269	1	1	MF
GO:0003735	structural constituent of ribosome	0.00152919	1	1	MF
GO:0003774	motor activity	0.00399742	1	1	MF
GO:0003777	microtubule motor activity	0.000858255	1	1	MF
GO:0003796	lysozyme activity	0.0233766	1	1	MF
GO:0003824	catalytic activity	0.0282419	1	1	MF
GO:0003887	DNA-directed DNA polymerase activity	9.51e-08	1	1	MF
GO:0003968	RNA-directed 5'-3' RNA polymerase activity	0.0233766	1	1	MF
GO:0004129	cytochrome-c oxidase activity	0.00195309	1	1	MF
GO:0004298	threonine-type endopeptidase activity	0.000502479	1	1	MF
GO:0004386	helicase activity	1.17e-10	1	1	MF
GO:0004518	nuclease activity	4.06e-05	1	1	MF
GO:0004519	endonuclease activity	7.62e-06	1	1	MF
GO:0004520	endodeoxyribonuclease activity	0.000607354	1	1	MF
GO:0004527	exonuclease activity	0.0424422	1	1	MF
GO:0004536	deoxyribonuclease activity	0.00981582	1	1	MF
GO:0004568	chitinase activity	0.015963	1	1	MF
GO:0004803	transposase activity	0.028728	1	1	MF
GO:0005096	GTPase activator activity	0.020175	1	1	MF
GO:0005198	structural molecule activity	3.09e-08	1	1	MF
GO:0005524	ATP binding	7.68e-05	1	1	MF
GO:0005622	intracellular	0.0364141	1	1	CC
GO:0005623	cell	0.0368696	1	1	CC
GO:0005667	transcription factor complex	0.013584	1	1	CC
GO:0005737	cytoplasm	6.43e-06	1	1	CC
GO:0005743	mitochondrial inner membrane	0.0489169	1	1	CC
GO:0005798	Golgi-associated vesicle	0.0124576	1	1	CC
GO:0005839	proteasome core complex	0.000240739	1	1	CC
GO:0005840	ribosome	0.000146156	1	1	CC
GO:0006022	aminoglycan metabolic process	5.83e-05	1	1	BP
GO:0006026	aminoglycan catabolic process	4.87e-07	1	1	BP
GO:0006027	glycosaminoglycan catabolic process	1.17e-05	1	1	BP
GO:0006030	chitin metabolic process	0.0413066	1	1	BP
GO:0006032	chitin catabolic process	0.0163618	1	1	BP
GO:0006119	oxidative phosphorylation	0.0299681	1	1	BP
GO:0006139	nucleobase-containing compound metabolic process	9.81e-20	1	1	BP
GO:0006220	pyrimidine nucleotide metabolic process	0.0292357	1	1	BP
GO:0006231	dTMP biosynthetic process	0.00345177	1	1	BP
GO:0006259	DNA metabolic process	1.6e-30	1	1	BP
GO:0006260	DNA replication	3.83e-24	1	1	BP
GO:0006261	DNA-dependent DNA replication	0.00021297	1	1	BP
GO:0006270	DNA replication initiation	0.0158282	1	1	BP
GO:0006275	regulation of DNA replication	0.040858	1	1	BP
GO:0006304	DNA modification	3.08e-13	1	1	BP
GO:0006305	DNA alkylation	1.12e-12	1	1	BP
GO:0006306	DNA methylation	1.12e-12	1	1	BP
GO:0006310	DNA recombination	1.51e-07	1	1	BP
GO:0006323	DNA packaging	0.00257492	1	1	BP
GO:0006351	transcription, DNA-templated	0.000247277	1	1	BP
GO:0006352	DNA-templated transcription, initiation	0.000277729	1	1	BP
GO:0006355	regulation of transcription, DNA-templated	0.000106468	1	1	BP
GO:0006412	translation	0.000832312	1	1	BP
GO:0006486	protein glycosylation	0.042863	1	1	BP
GO:0006487	protein N-linked glycosylation	0.0392575	1	1	BP
GO:0006518	peptide metabolic process	0.00091075	0.0439902	1	BP
GO:0006629	lipid metabolic process	1	0.0178308	1	BP
GO:0006725	cellular aromatic compound metabolic process	1.18e-17	1	1	BP
GO:0006753	nucleoside phosphate metabolic process	0.0463102	1	1	BP
GO:0006807	nitrogen compound metabolic process	1.09e-13	1	1	BP
GO:0006888	ER to Golgi vesicle-mediated transport	0.0325897	1	1	BP
GO:0006928	movement of cell or subcellular component	0.00199319	1	1	BP
GO:0007017	microtubule-based process	0.00177759	1	1	BP
GO:0007018	microtubule-based movement	0.000924242	1	1	BP
GO:0007154	cell communication	1	0.0373926	1	BP
GO:0007165	signal transduction	1	0.0291097	1	BP
GO:0007264	small GTPase mediated signal transduction	1	0.0325385	1	BP
GO:0008017	microtubule binding	0.0104415	1	1	MF
GO:0008104	protein localization	0.021004	1	1	BP
GO:0008144	drug binding	0.00047796	1	1	MF
GO:0008152	metabolic process	2.06e-05	1	1	BP
GO:0008168	methyltransferase activity	1.51e-07	1	1	MF
GO:0008170	N-methyltransferase activity	4.88e-08	1	1	MF
GO:0008408	3'-5' exonuclease activity	0.0207655	1	1	MF
GO:0008641	ubiquitin-like modifier activating enzyme activity	0.0224616	1	1	MF
GO:0008745	N-acetylmuramoyl-L-alanine amidase activity	0.00995287	1	1	MF
GO:0009007	site-specific DNA-methyltransferase (adenine-specific) activity	0.0126331	1	1	MF
GO:0009008	DNA-methyltransferase activity	0.00146018	1	1	MF
GO:0009055	electron transfer activity	0.00617589	1	1	MF
GO:0009057	macromolecule catabolic process	0.00106684	1	1	BP
GO:0009058	biosynthetic process	7.46e-14	1	1	BP
GO:0009059	macromolecule biosynthetic process	2.15e-20	1	1	BP
GO:0009101	glycoprotein biosynthetic process	0.0247271	1	1	BP
GO:0009123	nucleoside monophosphate metabolic process	0.00666519	1	1	BP
GO:0009124	nucleoside monophosphate biosynthetic process	0.0128661	1	1	BP
GO:0009129	pyrimidine nucleoside monophosphate metabolic process	0.00201024	1	1	BP
GO:0009130	pyrimidine nucleoside monophosphate biosynthetic process	0.00201024	1	1	BP
GO:0009141	nucleoside triphosphate metabolic process	0.0462388	1	1	BP
GO:0009157	deoxyribonucleoside monophosphate biosynthetic process	0.00345177	1	1	BP
GO:0009162	deoxyribonucleoside monophosphate metabolic process	0.0206204	1	1	BP
GO:0009176	pyrimidine deoxyribonucleoside monophosphate metabolic process	0.00345177	1	1	BP
GO:0009177	pyrimidine deoxyribonucleoside monophosphate biosynthetic process	0.00345177	1	1	BP
GO:0009200	deoxyribonucleoside triphosphate metabolic process	0.0392575	1	1	BP
GO:0009211	pyrimidine deoxyribonucleoside triphosphate metabolic process	0.0392575	1	1	BP
GO:0009219	pyrimidine deoxyribonucleotide metabolic process	0.00118628	1	1	BP
GO:0009221	pyrimidine deoxyribonucleotide biosynthetic process	0.0102567	1	1	BP
GO:0009253	peptidoglycan catabolic process	1.17e-05	1	1	BP
GO:0009262	deoxyribonucleotide metabolic process	0.001434	1	1	BP
GO:0009263	deoxyribonucleotide biosynthetic process	0.0102567	1	1	BP
GO:0009265	2'-deoxyribonucleotide biosynthetic process	0.0102567	1	1	BP
GO:0009394	2'-deoxyribonucleotide metabolic process	0.000929359	1	1	BP
GO:0009605	response to external stimulus	0.00280477	1	1	BP
GO:0009889	regulation of biosynthetic process	1.87e-05	1	1	BP
GO:0009987	cellular process	1.29e-13	1	1	BP
GO:0010467	gene expression	0.00143981	0.00100368	1	BP
GO:0010468	regulation of gene expression	0.000261728	1	1	BP
GO:0010556	regulation of macromolecule biosynthetic process	2.23e-05	1	1	BP
GO:0012505	endomembrane system	1	0.030671	1	CC
GO:0012506	vesicle membrane	0.0338522	1	1	CC
GO:0015002	heme-copper terminal oxidase activity	0.000502479	1	1	MF
GO:0015031	protein transport	0.0114744	1	1	BP
GO:0015074	DNA integration	1.56e-06	0.0134249	1	BP
GO:0015078	proton transmembrane transporter activity	0.0233706	1	1	MF
GO:0015630	microtubule cytoskeleton	0.0494476	1	1	CC
GO:0015631	tubulin binding	0.0441697	1	1	MF
GO:0015833	peptide transport	0.011416	1	1	BP
GO:0015980	energy derivation by oxidation of organic compounds	0.035895	1	1	BP
GO:0015985	energy coupled proton transport, down electrochemical gradient	0.00776476	1	1	BP
GO:0015986	ATP synthesis coupled proton transport	0.00776476	1	1	BP
GO:0016032	viral process	6.53e-06	1	1	BP
GO:0016043	cellular component organization	0.0305418	1	1	BP
GO:0016070	RNA metabolic process	1	0.00695133	1	BP
GO:0016462	pyrophosphatase activity	1.29e-09	1	1	MF
GO:0016485	protein processing	0.000929359	1	1	BP
GO:0016539	intein-mediated protein splicing	0.00452291	1	1	BP
GO:0016667	oxidoreductase activity, acting on a sulfur group of donors	0.00571844	1	1	MF
GO:0016675	oxidoreductase activity, acting on a heme group of donors	0.00195309	1	1	MF
GO:0016676	oxidoreductase activity, acting on a heme group of donors, oxygen as acceptor	0.00195309	1	1	MF
GO:0016740	transferase activity	0.009712	1	1	MF
GO:0016741	transferase activity, transferring one-carbon groups	1.44e-06	1	1	MF
GO:0016779	nucleotidyltransferase activity	4.2e-07	1	1	MF
GO:0016787	hydrolase activity	1.28e-05	1	1	MF
GO:0016817	hydrolase activity, acting on acid anhydrides	1.24e-09	1	1	MF
GO:0016818	hydrolase activity, acting on acid anhydrides, in phosphorus-containing anhydrides	2.09e-09	1	1	MF
GO:0016888	endodeoxyribonuclease activity, producing 5'-phosphomonoesters	0.00251069	1	1	MF
GO:0016893	endonuclease activity, active with either ribo- or deoxyribonucleic acids and producing 5'-phosphomonoesters	0.00101705	1	1	MF
GO:0016917	GABA receptor activity	0.0201409	1	1	MF
GO:0016987	bacterial sigma factor activity	0.00146018	1	1	MF
GO:0016998	cell wall macromolecule catabolic process	3.47e-05	1	1	BP
GO:0017076	purine nucleotide binding	0.000785933	1	1	MF
GO:0017111	nucleoside-triphosphatase activity	4.94e-09	1	1	MF
GO:0018130	heterocycle biosynthetic process	0.00329357	1	1	BP
GO:0018142	protein-DNA covalent cross-linking	0.00345077	1	1	BP
GO:0018143	nucleic acid-protein covalent cross-linking	0.00345077	1	1	BP
GO:0019012	virion	5.34e-13	1	1	CC
GO:0019028	viral capsid	7.08e-13	1	1	CC
GO:0019058	viral life cycle	3.49e-05	1	1	BP
GO:0019068	virion assembly	0.000302708	1	1	BP
GO:0019079	viral genome replication	0.0440905	1	1	BP
GO:0019219	regulation of nucleobase-containing compound metabolic process	4.41e-05	1	1	BP
GO:0019222	regulation of metabolic process	9.31e-05	1	1	BP
GO:0019438	aromatic compound biosynthetic process	0.00150667	1	1	BP
GO:0019692	deoxyribose phosphate metabolic process	0.000929359	1	1	BP
GO:0019773	proteasome core complex, alpha-subunit complex	0.0210348	1	1	CC
GO:0019866	organelle inner membrane	0.0405825	1	1	CC
GO:0022900	electron transport chain	0.0158282	1	1	BP
GO:0022904	respiratory electron transport chain	0.00345177	1	1	BP
GO:0023052	signaling	1	0.0250148	1	BP
GO:0030117	membrane coat	0.00627858	1	1	CC
GO:0030120	vesicle coat	0.0422545	1	1	CC
GO:0030163	protein catabolic process	0.0240752	1	1	BP
GO:0030203	glycosaminoglycan metabolic process	0.000170702	1	1	BP
GO:0030313	cell envelope	0.0156215	1	1	CC
GO:0030554	adenyl nucleotide binding	8.46e-05	1	1	MF
GO:0030659	cytoplasmic vesicle membrane	0.0338522	1	1	CC
GO:0030660	Golgi-associated vesicle membrane	0.0124576	1	1	CC
GO:0030662	coated vesicle membrane	0.0422545	1	1	CC
GO:0030695	GTPase regulator activity	0.0202813	1	1	MF
GO:0030908	protein splicing	0.00345177	1	1	BP
GO:0031323	regulation of cellular metabolic process	3.83e-05	1	1	BP
GO:0031326	regulation of cellular biosynthetic process	2.04e-05	1	1	BP
GO:0032259	methylation	1.47e-09	1	1	BP
GO:0032553	ribonucleotide binding	0.000802715	1	1	MF
GO:0032555	purine ribonucleotide binding	0.000954826	1	1	MF
GO:0032559	adenyl ribonucleotide binding	8.99e-05	1	1	MF
GO:0032774	RNA biosynthetic process	0.000158995	1	1	BP
GO:0032775	DNA methylation on adenine	0.0129634	1	1	BP
GO:0032991	protein-containing complex	0.00283463	1	1	CC
GO:0033036	macromolecule localization	0.0239783	1	1	BP
GO:0034061	DNA polymerase activity	3.85e-07	1	1	MF
GO:0034641	cellular nitrogen compound metabolic process	1.09e-19	0.0435885	1	BP
GO:0034645	cellular macromolecule biosynthetic process	3.15e-20	1	1	BP
GO:0034654	nucleobase-containing compound biosynthetic process	0.000161475	1	1	BP
GO:0034660	ncRNA metabolic process	1	0.0325385	1	BP
GO:0035639	purine ribonucleoside triphosphate binding	0.000888938	1	1	MF
GO:0042083	5,10-methylenetetrahydrofolate-dependent methyltransferase activity	0.00336124	1	1	MF
GO:0042493	response to drug	0.014117	1	1	BP
GO:0042624	ATPase activity, uncoupled	0.00331864	1	1	MF
GO:0042773	ATP synthesis coupled electron transport	0.0299681	1	1	BP
GO:0042886	amide transport	0.0124999	1	1	BP
GO:0043043	peptide biosynthetic process	0.00122834	1	1	BP
GO:0043167	ion binding	0.025135	1	1	MF
GO:0043168	anion binding	0.018847	1	1	MF
GO:0043170	macromolecule metabolic process	1.03e-16	1	1	BP
GO:0043228	non-membrane-bounded organelle	0.00712406	1	1	CC
GO:0043232	intracellular non-membrane-bounded organelle	0.00712406	1	1	CC
GO:0043413	macromolecule glycosylation	0.042863	1	1	BP
GO:0043414	macromolecule methylation	2.98e-07	1	1	BP
GO:0043543	protein acylation	0.0392575	1	1	BP
GO:0043603	cellular amide metabolic process	0.00567143	0.0327736	1	BP
GO:0043604	amide biosynthetic process	0.00138463	0.0467305	1	BP
GO:0044036	cell wall macromolecule metabolic process	0.0001004	1	1	BP
GO:0044237	cellular metabolic process	4.01e-11	1	1	BP
GO:0044238	primary metabolic process	5.08e-11	1	1	BP
GO:0044249	cellular biosynthetic process	1.6e-14	1	1	BP
GO:0044260	cellular macromolecule metabolic process	9.07e-22	0.0466255	1	BP
GO:0044271	cellular nitrogen compound biosynthetic process	1.7e-05	1	1	BP
GO:0044403	symbiont process	4.02e-06	1	1	BP
GO:0044419	interspecies interaction between organisms	3.49e-07	1	1	BP
GO:0044423	virion part	5.34e-13	1	1	CC
GO:0044424	intracellular part	0.00892008	1	1	CC
GO:0044428	nuclear part	1	0.0197734	1	CC
GO:0044444	cytoplasmic part	4.42e-05	1	1	CC
GO:0044464	cell part	0.0368696	1	1	CC
GO:0044728	DNA methylation or demethylation	1.12e-12	1	1	BP
GO:0045184	establishment of protein localization	0.0200058	1	1	BP
GO:0045259	proton-transporting ATP synthase complex	0.0116005	1	1	CC
GO:0045333	cellular respiration	0.00714384	1	1	BP
GO:0046034	ATP metabolic process	0.0172791	1	1	BP
GO:0046073	dTMP metabolic process	0.00345177	1	1	BP
GO:0046080	dUTP metabolic process	0.0392575	1	1	BP
GO:0046348	amino sugar catabolic process	0.0163618	1	1	BP
GO:0046385	deoxyribose phosphate biosynthetic process	0.0102567	1	1	BP
GO:0046483	heterocycle metabolic process	4.04e-17	1	1	BP
GO:0046982	protein heterodimerization activity	0.0326512	1	1	MF
GO:0048193	Golgi vesicle transport	0.00542546	1	1	BP
GO:0048475	coated membrane	0.00627858	1	1	CC
GO:0050789	regulation of biological process	1	0.00773311	1	BP
GO:0050794	regulation of cellular process	1	0.0114844	1	BP
GO:0050797	thymidylate synthase (FAD) activity	0.0130553	1	1	MF
GO:0051082	unfolded protein binding	0.00550839	1	1	MF
GO:0051171	regulation of nitrogen compound metabolic process	1.89e-05	1	1	BP
GO:0051252	regulation of RNA metabolic process	9.04e-05	1	1	BP
GO:0051259	protein complex oligomerization	0.00435994	1	1	BP
GO:0051260	protein homooligomerization	0.0128191	1	1	BP
GO:0051276	chromosome organization	0.0165955	1	1	BP
GO:0051604	protein maturation	0.0011442	1	1	BP
GO:0051704	multi-organism process	1.89e-08	1	1	BP
GO:0060255	regulation of macromolecule metabolic process	8.47e-05	1	1	BP
GO:0060589	nucleoside-triphosphatase regulator activity	0.00804437	1	1	MF
GO:0061783	peptidoglycan muralytic activity	0.0005531	1	1	MF
GO:0065007	biological regulation	1	0.0320489	1	BP
GO:0070003	threonine-type peptidase activity	0.000502479	1	1	MF
GO:0070085	glycosylation	0.0374625	1	1	BP
GO:0070972	protein localization to endoplasmic reticulum	0.0174618	1	1	BP
GO:0071103	DNA conformation change	0.000891798	1	1	BP
GO:0071554	cell wall organization or biogenesis	6.09e-05	1	1	BP
GO:0071704	organic substance metabolic process	2.04e-10	1	1	BP
GO:0080090	regulation of primary metabolic process	8.58e-06	1	1	BP
GO:0090304	nucleic acid metabolic process	9.44e-20	0.0072723	1	BP
GO:0097159	organic cyclic compound binding	3.23e-16	0.00836504	1	MF
GO:0097367	carbohydrate derivative binding	0.000416746	1	1	MF
GO:0097659	nucleic acid-templated transcription	0.000247277	1	1	BP
GO:0098796	membrane protein complex	0.000813792	1	1	CC
GO:0098800	inner mitochondrial membrane protein complex	0.0441039	1	1	CC
GO:0140097	catalytic activity, acting on DNA	6.01e-18	1	1	MF
GO:0140098	catalytic activity, acting on RNA	0.00687681	1	1	MF
GO:0140101	catalytic activity, acting on a tRNA	0.011479	1	1	MF
GO:1901071	glucosamine-containing compound metabolic process	0.035895	1	1	BP
GO:1901072	glucosamine-containing compound catabolic process	0.0163618	1	1	BP
GO:1901135	carbohydrate derivative metabolic process	0.00585189	1	1	BP
GO:1901136	carbohydrate derivative catabolic process	0.000284876	1	1	BP
GO:1901265	nucleoside phosphate binding	0.0206456	1	1	MF
GO:1901360	organic cyclic compound metabolic process	7.64e-17	1	1	BP
GO:1901362	organic cyclic compound biosynthetic process	0.00320935	1	1	BP
GO:1901363	heterocyclic compound binding	2.02e-16	0.00851532	1	MF
GO:1901565	organonitrogen compound catabolic process	0.00506282	1	1	BP
GO:1901566	organonitrogen compound biosynthetic process	0.0113225	1	1	BP
GO:1901576	organic substance biosynthetic process	7.47e-14	1	1	BP
GO:1902494	catalytic complex	0.0309913	1	1	CC
GO:1903506	regulation of nucleic acid-templated transcription	0.000106468	1	1	BP
GO:1905368	peptidase complex	0.000158278	1	1	CC
GO:1905369	endopeptidase complex	0.000172754	1	1	CC
GO:1990904	ribonucleoprotein complex	0.00133162	1	1	CC
GO:2000112	regulation of cellular macromolecule biosynthetic process	2.23e-05	1	1	BP
GO:2001141	regulation of RNA biosynthetic process	0.000106468	1	1	BP
