# Supplementary material for: Combined transcriptome and proteome profiling reveals specific molecular brain signatures for sex, maturation and circalunar clock phase
Source: eLife. 2019 Feb 15;8:e41556. doi: 10.7554/eLife.41556 (PMC6377233; doi:10.7554/eLife.41556)
Supplement: Figure 3—source data 9. — This file contains the over- and under-representet GO-terms for the maturation comparison on transcript level. Tabs for each of the three ontologies, i.e. Molecular Function, Biological Process, and Cellular Compartment. [file elife-41556-fig3-data9.xlsx]

## Sheet: MF_OVER
GOMFID	Pvalue	OddsRatio	ExpCount	Count	Size	Term	test	ontology	subset
GO:0005515	2.05e-21	1.49915	902.491	1120	3811	protein binding	over	MF	allMat
GO:0005509	3.19e-07	1.61554	130.088	181	548	calcium ion binding	over	MF	allMat
GO:0016705	1.46e-06	2.14387	41.7801	70	176	oxidoreductase activity, acting on paired donors, with incorporation or reduction of molecular oxygen	over	MF	allMat
GO:0015318	7.45e-06	1.50147	140.296	186	591	inorganic molecular entity transmembrane transporter activity	over	MF	allMat
GO:0020037	1.83e-05	1.98132	41.3054	66	174	heme binding	over	MF	allMat
GO:0022838	0.000115316	1.55144	85.222	116	359	substrate-specific channel activity	over	MF	allMat
GO:0008509	0.000170105	3.40188	9.24394	20	39	anion transmembrane transporter activity	over	MF	allMat
GO:0022803	0.000215295	1.51949	86.4089	116	364	passive transmembrane transporter activity	over	MF	allMat
GO:0005452	0.000268161	22.5298	1.8991	7	8	inorganic anion exchanger activity	over	MF	allMat
GO:0005230	0.000361277	1.83437	36.0828	55	152	extracellular ligand-gated ion channel activity	over	MF	allMat
GO:0005506	0.000692194	1.7585	37.7446	56	159	iron ion binding	over	MF	allMat
GO:0016791	0.000988307	1.68764	41.5428	60	175	phosphatase activity	over	MF	allMat
GO:0051015	0.0014449	4.42777	4.51036	11	19	actin filament binding	over	MF	allMat
GO:0051537	0.00173561	2.88332	8.54594	17	36	2 iron, 2 sulfur cluster binding	over	MF	allMat
GO:0003684	0.00203216	4.59939	4.03558	10	17	damaged DNA binding	over	MF	allMat
GO:0004725	0.00225607	1.98576	19.9405	32	84	protein tyrosine phosphatase activity	over	MF	allMat
GO:0016614	0.00300734	1.96104	19.4657	31	82	oxidoreductase activity, acting on CH-OH group of donors	over	MF	allMat
GO:0015171	0.00338437	3.00621	6.88423	14	29	amino acid transmembrane transporter activity	over	MF	allMat
GO:0031406	0.00338437	3.00621	6.88423	14	29	carboxylic acid binding	over	MF	allMat
GO:0005507	0.00343634	2.44922	10.445	19	44	copper ion binding	over	MF	allMat
GO:0005342	0.00497604	2.81808	7.12161	14	30	organic acid transmembrane transporter activity	over	MF	allMat
GO:0004499	0.00761077	6.43417	2.13648	6	9	N,N-dimethylaniline monooxygenase activity	over	MF	allMat
GO:0003707	0.00853162	2.23025	10.445	18	44	steroid hormone receptor activity	over	MF	allMat
GO:0008083	0.00866686	3.62069	4.03558	9	17	growth factor activity	over	MF	allMat
GO:0004198	0.00993883	2.95082	5.4599	11	23	calcium-dependent cysteine-type endopeptidase activity	over	MF	allMat
GO:0008289	0.0117794	1.72331	21.1275	31	89	lipid binding	over	MF	allMat
GO:0016878	0.0128488	12.8634	1.18694	4	5	acid-thiol ligase activity	over	MF	allMat
GO:0003810	0.0128488	12.8634	1.18694	4	5	protein-glutamine gamma-glutamyltransferase activity	over	MF	allMat
GO:0004467	0.0133688	Inf	0.712161	3	3	long-chain fatty acid-CoA ligase activity	over	MF	allMat
GO:0015278	0.0133688	Inf	0.712161	3	3	calcium-release channel activity	over	MF	allMat
GO:0031409	0.0133688	Inf	0.712161	3	3	pigment binding	over	MF	allMat
GO:0043546	0.0133688	Inf	0.712161	3	3	molybdopterin cofactor binding	over	MF	allMat
GO:0046873	0.0135211	1.41422	51.446	66	217	metal ion transmembrane transporter activity	over	MF	allMat
GO:0003950	0.0140197	2.46195	7.12161	13	30	NAD+ ADP-ribosyltransferase activity	over	MF	allMat
GO:0005044	0.0177513	1.74554	17.5666	26	74	scavenger receptor activity	over	MF	allMat
GO:0016301	0.0192556	1.24897	114.238	134	482	kinase activity	over	MF	allMat
GO:0005201	0.0199682	3.21749	3.79819	8	16	extracellular matrix structural constituent	over	MF	allMat
GO:0022857	0.0204871	1.42206	42.6445	55	182	transmembrane transporter activity	over	MF	allMat
GO:0050660	0.0230714	1.67313	18.7536	27	79	flavin adenine dinucleotide binding	over	MF	allMat
GO:0019205	0.0237426	2.14617	8.30855	14	35	nucleobase-containing compound kinase activity	over	MF	allMat
GO:0022839	0.0255076	1.73692	15.5724	23	66	ion gated channel activity	over	MF	allMat
GO:0008514	0.0305762	2.04844	8.54594	14	36	organic anion transmembrane transporter activity	over	MF	allMat
GO:0015276	0.0307149	6.47654	1.41671	4	6	ligand-gated ion channel activity	over	MF	allMat
GO:0004448	0.0313033	6.43113	1.42432	4	6	isocitrate dehydrogenase activity	over	MF	allMat
GO:0019899	0.0353801	1.50101	25.4004	34	107	enzyme binding	over	MF	allMat
GO:0016810	0.037771	1.61053	17.804	25	75	hydrolase activity, acting on carbon-nitrogen (but not peptide) bonds	over	MF	allMat
GO:0004497	0.0384076	1.74792	12.8189	19	54	monooxygenase activity	over	MF	allMat
GO:0008308	0.0397081	4.01988	2.13648	5	9	voltage-gated anion channel activity	over	MF	allMat
GO:0015291	0.0411251	1.49712	23.9419	32	101	secondary active transmembrane transporter activity	over	MF	allMat
GO:0016829	0.041743	1.35007	43.4418	54	183	lyase activity	over	MF	allMat
GO:0004197	0.0426789	2.5788	4.26634	8	18	cysteine-type endopeptidase activity	over	MF	allMat
GO:0015108	0.0430851	3.21625	2.84865	6	12	chloride transmembrane transporter activity	over	MF	allMat
GO:0015385	0.0439607	9.64484	0.949549	3	4	sodium:proton antiporter activity	over	MF	allMat
GO:0015321	0.0439607	9.64484	0.949549	3	4	sodium-dependent phosphate transmembrane transporter activity	over	MF	allMat
GO:0016801	0.0439607	9.64484	0.949549	3	4	hydrolase activity, acting on ether bonds	over	MF	allMat
GO:0019238	0.0439607	9.64484	0.949549	3	4	cyclohydrolase activity	over	MF	allMat
GO:0004013	0.0439607	9.64484	0.949549	3	4	adenosylhomocysteinase activity	over	MF	allMat
GO:0042162	0.0439607	9.64484	0.949549	3	4	telomeric DNA binding	over	MF	allMat
GO:0015085	0.0451718	2.03243	7.359	12	31	calcium ion transmembrane transporter activity	over	MF	allMat
GO:0005328	0.0456828	1.76535	11.3946	17	48	neurotransmitter:sodium symporter activity	over	MF	allMat
GO:0140096	0.0476205	1.11866	319.523	345	1346	catalytic activity, acting on a protein	over	MF	allMat
GO:0015294	0.0499683	1.65109	14.0058	20	59	solute:cation symporter activity	over	MF	allMat

## Sheet: BP_OVER
GOBBPID	Pvalue	OddsRatio	ExpCount	Count	Size	Term	test	ontology	subset
GO:0051234	5.84e-07	1.36218	364.899	441	1544	establishment of localization	over	BP	allMat
GO:0055085	7.79e-07	1.55211	151.111	203	641	transmembrane transport	over	BP	allMat
GO:0006811	3.74e-05	1.50506	117.839	156	502	ion transport	over	BP	allMat
GO:0055114	0.000151497	1.34905	196.393	240	831	oxidation-reduction process	over	BP	allMat
GO:0006396	0.000795263	1.6177	52.1298	73	221	RNA processing	over	BP	allMat
GO:0031123	0.000968218	19.4365	1.65433	6	7	RNA 3'-end processing	over	BP	allMat
GO:0007160	0.00169325	3.89284	5.19933	12	22	cell-matrix adhesion	over	BP	allMat
GO:0048545	0.00264023	2.22872	13.9437	24	59	response to steroid hormone	over	BP	allMat
GO:0071396	0.00264023	2.22872	13.9437	24	59	cellular response to lipid	over	BP	allMat
GO:0043401	0.00264023	2.22872	13.9437	24	59	steroid hormone mediated signaling pathway	over	BP	allMat
GO:0023052	0.00274761	1.22134	280.055	319	1185	signaling	over	BP	allMat
GO:0006470	0.00286174	1.75103	29.069	43	123	protein dephosphorylation	over	BP	allMat
GO:0006378	0.00311333	Inf	0.945334	4	4	mRNA polyadenylation	over	BP	allMat
GO:0098656	0.00335415	2.62799	8.98067	17	38	anion transmembrane transport	over	BP	allMat
GO:0032870	0.00343091	2.16652	14.18	24	60	cellular response to hormone stimulus	over	BP	allMat
GO:0071407	0.00343091	2.16652	14.18	24	60	cellular response to organic cyclic compound	over	BP	allMat
GO:0006820	0.00461093	2.71671	7.7714	15	33	anion transport	over	BP	allMat
GO:0007154	0.00516621	1.20158	285.727	322	1209	cell communication	over	BP	allMat
GO:0003333	0.00678678	2.81082	6.61734	13	28	amino acid transmembrane transport	over	BP	allMat
GO:0006672	0.00742541	6.47707	2.127	6	9	ceramide metabolic process	over	BP	allMat
GO:0036211	0.00749409	1.22426	202.301	232	856	protein modification process	over	BP	allMat
GO:0006955	0.00922548	2.43293	8.27167	15	35	immune response	over	BP	allMat
GO:0007076	0.00997626	8.09387	1.65433	5	7	mitotic chromosome condensation	over	BP	allMat
GO:0055080	0.0121977	3.70243	3.545	8	15	cation homeostasis	over	BP	allMat
GO:0098771	0.0121977	3.70243	3.545	8	15	inorganic ion homeostasis	over	BP	allMat
GO:0035435	0.0126275	12.9463	1.18167	4	5	phosphate ion transmembrane transport	over	BP	allMat
GO:0018149	0.0126275	12.9463	1.18167	4	5	peptide cross-linking	over	BP	allMat
GO:0016180	0.0126275	12.9463	1.18167	4	5	snRNA processing	over	BP	allMat
GO:0016054	0.0129834	2.38952	7.799	14	33	organic acid catabolic process	over	BP	allMat
GO:0006597	0.0131867	Inf	0.709	3	3	spermine biosynthetic process	over	BP	allMat
GO:0006536	0.0131867	Inf	0.709	3	3	glutamate metabolic process	over	BP	allMat
GO:0007034	0.0148718	4.85714	2.36333	6	10	vacuolar transport	over	BP	allMat
GO:0035556	0.017425	1.26294	109.422	129	463	intracellular signal transduction	over	BP	allMat
GO:1903825	0.0182682	2.34139	7.32634	13	31	organic acid transmembrane transport	over	BP	allMat
GO:0051716	0.0194993	1.15322	317.501	348	1348	cellular response to stimulus	over	BP	allMat
GO:0061919	0.0200614	2.91576	4.49033	9	19	process utilizing autophagic mechanism	over	BP	allMat
GO:0016072	0.0213529	2.11473	8.98067	15	38	rRNA metabolic process	over	BP	allMat
GO:0006836	0.0278001	1.80223	13.2347	20	56	neurotransmitter transport	over	BP	allMat
GO:0033013	0.0289848	2.65033	4.72667	9	20	tetrapyrrole metabolic process	over	BP	allMat
GO:0006629	0.0302579	1.33817	54.3567	67	230	lipid metabolic process	over	BP	allMat
GO:0006643	0.0306047	6.48739	1.41548	4	6	membrane lipid metabolic process	over	BP	allMat
GO:0006471	0.0307985	6.47225	1.418	4	6	protein ADp-ribosylation	over	BP	allMat
GO:0006779	0.0307985	6.47225	1.418	4	6	porphyrin-containing compound biosynthetic process	over	BP	allMat
GO:1901361	0.0310092	1.57107	21.7427	30	92	organic cyclic compound catabolic process	over	BP	allMat
GO:0070887	0.0348801	1.59332	19.3793	27	82	cellular response to chemical stimulus	over	BP	allMat
GO:0009719	0.0357556	1.6225	17.725	25	75	response to endogenous stimulus	over	BP	allMat
GO:0070647	0.036048	1.50927	24.5787	33	104	protein modification by small protein conjugation or removal	over	BP	allMat
GO:0060070	0.0389733	4.04584	2.127	5	9	canonical Wnt signaling pathway	over	BP	allMat
GO:0046700	0.0390146	1.54312	21.27	29	90	heterocycle catabolic process	over	BP	allMat
GO:0006664	0.040349	2.42914	4.963	9	21	glycolipid metabolic process	over	BP	allMat
GO:1901606	0.040349	2.42914	4.963	9	21	alpha-amino acid catabolic process	over	BP	allMat
GO:0048878	0.040349	2.42914	4.963	9	21	chemical homeostasis	over	BP	allMat
GO:0046039	0.0421889	3.23721	2.836	6	12	GTp metabolic process	over	BP	allMat
GO:0010256	0.0421889	3.23721	2.836	6	12	endomembrane system organization	over	BP	allMat
GO:0070838	0.0427633	1.86996	9.68967	15	41	divalent metal ion transport	over	BP	allMat
GO:0009063	0.0431921	9.72812	0.943652	3	4	cellular amino acid catabolic process	over	BP	allMat
GO:0010506	0.043407	9.70542	0.945334	3	4	regulation of autophagy	over	BP	allMat
GO:0005978	0.043407	9.70542	0.945334	3	4	glycogen biosynthetic process	over	BP	allMat
GO:0046185	0.043407	9.70542	0.945334	3	4	aldehyde catabolic process	over	BP	allMat
GO:0017156	0.043407	9.70542	0.945334	3	4	calcium ion regulated exocytosis	over	BP	allMat
GO:0042135	0.043407	9.70542	0.945334	3	4	neurotransmitter catabolic process	over	BP	allMat
GO:0044341	0.043407	9.70542	0.945334	3	4	sodium-dependent phosphate transport	over	BP	allMat
GO:0042073	0.043407	9.70542	0.945334	3	4	intraciliary transport	over	BP	allMat
GO:0006885	0.043407	9.70542	0.945334	3	4	regulation of pH	over	BP	allMat
GO:0015711	0.0438279	1.77782	11.344	17	48	organic anion transport	over	BP	allMat
GO:0007015	0.0466154	1.89041	8.98067	14	38	actin filament organization	over	BP	allMat
GO:0007155	0.0472488	1.43032	28.5963	37	121	cell adhesion	over	BP	allMat

## Sheet: CC_OVER
GOCCID	Pvalue	OddsRatio	ExpCount	Count	Size	Term	test	ontology	subset
GO:0016021	0.00157714	1.22862	401.963	445	1566	integral component of membrane	over	CC	allMat
GO:0045211	0.00286397	2.75822	8.98385	17	35	postsynaptic membrane	over	CC	allMat
GO:0098590	0.00414984	2.61235	9.24053	17	36	plasma membrane region	over	CC	allMat
GO:0000178	0.00522913	14.532	1.54009	5	6	exosome (RNase complex)	over	CC	allMat
GO:0044456	0.00828241	2.2843	10.5239	18	41	synapse part	over	CC	allMat
GO:0005634	0.0115778	1.24596	161.966	186	631	nucleus	over	CC	allMat
GO:0016020	0.0120043	1.16195	696.995	732	2732	membrane	over	CC	allMat
GO:0005847	0.0168822	Inf	0.770044	3	3	mRNA cleavage and polyadenylation specificity factor complex	over	CC	allMat
GO:0005730	0.0227205	2.90923	4.62026	9	18	nucleolus	over	CC	allMat
GO:0032040	0.0303965	4.84139	2.05345	5	8	small-subunit processome	over	CC	allMat
GO:0005635	0.0313609	2.90774	4.1069	8	16	nuclear envelope	over	CC	allMat
GO:0031012	0.0329555	1.65817	17.711	25	69	extracellular matrix	over	CC	allMat
GO:0005852	0.0462299	2.58396	4.36358	8	17	eukaryotic translation initiation factor 3 complex	over	CC	allMat

## Sheet: MF_under
GOMFID	Pvalue	OddsRatio	ExpCount	Count	Size	Term	test	ontology	subset
GO:0003676	1.34e-22	0.600282	668.482	476	2816	nucleic acid binding	under	MF	allMat
GO:0003677	2.65e-21	0.509258	355.369	215	1497	DNA binding	under	MF	allMat
GO:0140097	6.01e-18	0.287296	107.299	38	452	catalytic activity, acting on DNA	under	MF	allMat
GO:1901363	2.02e-16	0.705402	1089.61	896	4590	heterocyclic compound binding	under	MF	allMat
GO:0097159	3.23e-16	0.707222	1090.32	898	4593	organic cyclic compound binding	under	MF	allMat
GO:0004386	1.17e-10	0.287866	59.8216	21	252	helicase activity	under	MF	allMat
GO:0016817	1.24e-09	0.567054	190.384	123	802	hydrolase activity, acting on acid anhydrides	under	MF	allMat
GO:0016462	1.29e-09	0.561642	184.212	118	776	pyrophosphatase activity	under	MF	allMat
GO:0016818	2.09e-09	0.567829	185.637	120	782	hydrolase activity, acting on acid anhydrides, in phosphorus-containing anhydrides	under	MF	allMat
GO:0017111	4.94e-09	0.571439	180.177	117	759	nucleoside-triphosphatase activity	under	MF	allMat
GO:0005198	3.09e-08	0.514689	118.456	70	499	structural molecule activity	under	MF	allMat
GO:0008170	4.88e-08	0.188986	29.6734	7	125	N-methyltransferase activity	under	MF	allMat
GO:0003678	8.61e-08	0.237609	34.1837	10	144	DNA helicase activity	under	MF	allMat
GO:0003887	9.51e-08	0.11003	21.3648	3	90	DNA-directed DNA polymerase activity	under	MF	allMat
GO:0008168	1.51e-07	0.480969	89.9697	50	379	methyltransferase activity	under	MF	allMat
GO:0034061	3.85e-07	0.187609	25.6378	6	108	DNA polymerase activity	under	MF	allMat
GO:0016779	4.2e-07	0.429214	65.7562	33	277	nucleotidyltransferase activity	under	MF	allMat
GO:0016741	1.44e-06	0.524812	93.5305	56	394	transferase activity, transferring one-carbon groups	under	MF	allMat
GO:0004519	7.62e-06	0.390768	43.4418	20	183	endonuclease activity	under	MF	allMat
GO:0016787	1.28e-05	0.80098	609.135	527	2566	hydrolase activity	under	MF	allMat
GO:0004518	4.06e-05	0.521201	65.7562	39	277	nuclease activity	under	MF	allMat
GO:0003697	4.21e-05	0.157286	15.1928	3	64	single-stranded DNA binding	under	MF	allMat
GO:0005524	7.68e-05	0.765029	318.811	263	1343	ATP binding	under	MF	allMat
GO:0030554	8.46e-05	0.766602	319.523	264	1346	adenyl nucleotide binding	under	MF	allMat
GO:0032559	8.99e-05	0.767385	319.286	264	1345	adenyl ribonucleotide binding	under	MF	allMat
GO:0097367	0.000416746	0.809328	399.76	345	1684	carbohydrate derivative binding	under	MF	allMat
GO:0008144	0.00047796	0.800719	351.096	300	1479	drug binding	under	MF	allMat
GO:0070003	0.000502479	0	6.64684	0	28	threonine-type peptidase activity	under	MF	allMat
GO:0004298	0.000502479	0	6.64684	0	28	threonine-type endopeptidase activity	under	MF	allMat
GO:0015002	0.000502479	0	6.64684	0	28	heme-copper terminal oxidase activity	under	MF	allMat
GO:0061783	0.0005531	0.148944	10.6824	2	45	peptidoglycan muralytic activity	under	MF	allMat
GO:0004520	0.000607354	0.23278	14.0058	4	59	endodeoxyribonuclease activity	under	MF	allMat
GO:0017076	0.000785933	0.815064	380.769	330	1604	purine nucleotide binding	under	MF	allMat
GO:0032553	0.000802715	0.816024	383.855	333	1617	ribonucleotide binding	under	MF	allMat
GO:0003777	0.000858255	0.460256	32.0473	17	135	microtubule motor activity	under	MF	allMat
GO:0035639	0.000888938	0.816667	379.107	329	1597	purine ribonucleoside triphosphate binding	under	MF	allMat
GO:0032555	0.000954826	0.817952	379.819	330	1600	purine ribonucleotide binding	under	MF	allMat
GO:0016893	0.00101705	0.364384	20.8901	9	88	endonuclease activity, active with either ribo- or deoxyribonucleic acids and producing 5'-phosphomonoesters	under	MF	allMat
GO:0009008	0.00146018	0.10014	7.83378	1	33	DNA-methyltransferase activity	under	MF	allMat
GO:0016987	0.00146018	0.10014	7.83378	1	33	bacterial sigma factor activity	under	MF	allMat
GO:0000990	0.00146018	0.10014	7.83378	1	33	transcription factor activity, core RNA polymerase binding	under	MF	allMat
GO:0000996	0.00146018	0.10014	7.83378	1	33	promoter selection factor activity	under	MF	allMat
GO:0003735	0.00152919	0.621048	65.5189	45	276	structural constituent of ribosome	under	MF	allMat
GO:0003724	0.0017269	0.168615	9.49549	2	40	RNA helicase activity	under	MF	allMat
GO:0016675	0.00195309	0	5.4599	0	23	oxidoreductase activity, acting on a heme group of donors	under	MF	allMat
GO:0016676	0.00195309	0	5.4599	0	23	oxidoreductase activity, acting on a heme group of donors, oxygen as acceptor	under	MF	allMat
GO:0004129	0.00195309	0	5.4599	0	23	cytochrome-c oxidase activity	under	MF	allMat
GO:0016888	0.00251069	0.266891	12.3441	4	52	endodeoxyribonuclease activity, producing 5'-phosphomonoesters	under	MF	allMat
GO:0042624	0.00331864	0.234421	10.445	3	44	ATPase activity, uncoupled	under	MF	allMat
GO:0042083	0.00336124	0	4.98513	0	21	5,10-methylenetetrahydrofolate-dependent methyltransferase activity	under	MF	allMat
GO:0003774	0.00399742	0.572934	40.5932	26	171	motor activity	under	MF	allMat
GO:0051082	0.00550839	0.400224	17.0919	8	72	unfolded protein binding	under	MF	allMat
GO:0016667	0.00571844	0.326868	12.8189	5	54	oxidoreductase activity, acting on a sulfur group of donors	under	MF	allMat
GO:0009055	0.00617589	0.423737	18.2788	9	77	electron transfer activity	under	MF	allMat
GO:0140098	0.00687681	0.698225	76.676	58	323	catalytic activity, acting on RNA	under	MF	allMat
GO:0060589	0.00804437	0.305178	10.9198	4	46	nucleoside-triphosphatase regulator activity	under	MF	allMat
GO:0016740	0.009712	0.870013	451.748	411	1903	transferase activity	under	MF	allMat
GO:0004536	0.00981582	0.443411	17.5666	9	74	deoxyribonuclease activity	under	MF	allMat
GO:0008745	0.00995287	0	4.03558	0	17	N-acetylmuramoyl-L-alanine amidase activity	under	MF	allMat
GO:0008017	0.0104415	0.427055	16.1423	8	68	microtubule binding	under	MF	allMat
GO:0140101	0.011479	0.568154	29.9108	19	126	catalytic activity, acting on a tRNA	under	MF	allMat
GO:0009007	0.0126331	0.139434	5.69729	1	24	site-specific DNA-methyltransferase (adenine-specific) activity	under	MF	allMat
GO:0050797	0.0130553	0	3.79819	0	16	thymidylate synthase (FAD) activity	under	MF	allMat
GO:0004568	0.015963	0.145785	5.4599	1	23	chitinase activity	under	MF	allMat
GO:0043168	0.018847	0.882868	445.101	409	1875	anion binding	under	MF	allMat
GO:0016917	0.0201409	0.152741	5.22252	1	22	GABA receptor activity	under	MF	allMat
GO:0005096	0.020175	0.300588	8.30855	3	35	GTPase activator activity	under	MF	allMat
GO:0030695	0.0202813	0.346569	9.73287	4	41	GTPase regulator activity	under	MF	allMat
GO:1901265	0.0206456	0.888316	478.572	442	2016	nucleoside phosphate binding	under	MF	allMat
GO:0000166	0.0206456	0.888316	478.572	442	2016	nucleotide binding	under	MF	allMat
GO:0008408	0.0207655	0.439839	13.7685	7	58	3'-5' exonuclease activity	under	MF	allMat
GO:0008641	0.0224616	0	3.32342	0	14	ubiquitin-like modifier activating enzyme activity	under	MF	allMat
GO:0000150	0.0224616	0	3.32342	0	14	recombinase activity	under	MF	allMat
GO:0015078	0.0233706	0.533857	19.9405	12	84	proton transmembrane transporter activity	under	MF	allMat
GO:0003968	0.0233766	0.246696	6.64684	2	28	RNA-directed 5'-3' RNA polymerase activity	under	MF	allMat
GO:0003796	0.0233766	0.246696	6.64684	2	28	lysozyme activity	under	MF	allMat
GO:0043167	0.025135	0.920683	1099.58	1052	4632	ion binding	under	MF	allMat
GO:0003824	0.0282419	0.927189	1426.22	1377	6008	catalytic activity	under	MF	allMat
GO:0004803	0.028728	0.256586	6.40945	2	27	transposase activity	under	MF	allMat
GO:0046982	0.0326512	0.411039	10.445	5	44	protein heterodimerization activity	under	MF	allMat
GO:0004527	0.0424422	0.543219	16.3797	10	69	exonuclease activity	under	MF	allMat
GO:0015631	0.0441697	0.586707	19.9405	13	84	tubulin binding	under	MF	allMat

## Sheet: BP_under
GOBPID	Pvalue	OddsRatio	ExpCount	Count	Size	Term	test	ontology	subset
GO:0006259	1.6e-30	0.355388	257.603	117	1090	DNA metabolic process	under	BP	allMat
GO:0006260	3.83e-24	0.144273	85.08	16	360	DNA replication	under	BP	allMat
GO:0044260	9.07e-22	0.604846	764.775	580	3236	cellular macromolecule metabolic process	under	BP	allMat
GO:0009059	2.15e-20	0.531488	400.821	260	1696	macromolecule biosynthetic process	under	BP	allMat
GO:0034645	3.15e-20	0.532871	400.112	260	1693	cellular macromolecule biosynthetic process	under	BP	allMat
GO:0090304	9.44e-20	0.578133	525.605	371	2224	nucleic acid metabolic process	under	BP	allMat
GO:0006139	9.81e-20	0.597391	610.213	447	2582	nucleobase-containing compound metabolic process	under	BP	allMat
GO:0034641	1.09e-19	0.614657	709.237	538	3001	cellular nitrogen compound metabolic process	under	BP	allMat
GO:0006725	1.18e-17	0.620094	626.047	471	2649	cellular aromatic compound metabolic process	under	BP	allMat
GO:0046483	4.04e-17	0.625492	626.52	474	2651	heterocycle metabolic process	under	BP	allMat
GO:1901360	7.64e-17	0.629373	632.665	481	2677	organic cyclic compound metabolic process	under	BP	allMat
GO:0043170	1.03e-16	0.666128	968.731	800	4099	macromolecule metabolic process	under	BP	allMat
GO:0044249	1.6e-14	0.62726	498.191	370	2108	cellular biosynthetic process	under	BP	allMat
GO:0009058	7.46e-14	0.641403	523.242	396	2214	biosynthetic process	under	BP	allMat
GO:1901576	7.47e-14	0.637595	506.699	381	2144	organic substance biosynthetic process	under	BP	allMat
GO:0006807	1.09e-13	0.700693	1094.93	942	4633	nitrogen compound metabolic process	under	BP	allMat
GO:0009987	1.29e-13	0.696002	1463.61	1316	6193	cellular process	under	BP	allMat
GO:0006304	3.08e-13	0.0492617	30.9597	2	131	DNA modification	under	BP	allMat
GO:0006305	1.12e-12	0.0512835	29.778	2	126	DNA alkylation	under	BP	allMat
GO:0006306	1.12e-12	0.0512835	29.778	2	126	DNA methylation	under	BP	allMat
GO:0044728	1.12e-12	0.0512835	29.778	2	126	DNA methylation or demethylation	under	BP	allMat
GO:0044237	4.01e-11	0.728259	1030.89	896	4362	cellular metabolic process	under	BP	allMat
GO:0044238	5.08e-11	0.732014	1165.12	1030	4930	primary metabolic process	under	BP	allMat
GO:0071704	2.04e-10	0.739668	1218.54	1088	5156	organic substance metabolic process	under	BP	allMat
GO:0032259	1.47e-09	0.266953	48.6847	16	206	methylation	under	BP	allMat
GO:0051704	1.89e-08	0.101942	22.9243	3	97	multi-organism process	under	BP	allMat
GO:0006310	1.51e-07	0.347398	50.339	21	213	DNA recombination	under	BP	allMat
GO:0043414	2.98e-07	0.295253	38.995	14	165	macromolecule methylation	under	BP	allMat
GO:0044419	3.49e-07	0.0865293	17.9613	2	76	interspecies interaction between organisms	under	BP	allMat
GO:0006026	4.87e-07	0.0500715	15.3617	1	65	aminoglycan catabolic process	under	BP	allMat
GO:0015074	1.56e-06	0.424495	58.138	29	246	DNA integration	under	BP	allMat
GO:0044403	4.02e-06	0.100187	15.598	2	66	symbiont process	under	BP	allMat
GO:0016032	6.53e-06	0.103447	15.1253	2	64	viral process	under	BP	allMat
GO:0080090	8.58e-06	0.660573	179.377	132	759	regulation of primary metabolic process	under	BP	allMat
GO:0006027	1.17e-05	0	9.926	0	42	glycosaminoglycan catabolic process	under	BP	allMat
GO:0009253	1.17e-05	0	9.926	0	42	peptidoglycan catabolic process	under	BP	allMat
GO:0044271	1.7e-05	0.753535	367.026	304	1553	cellular nitrogen compound biosynthetic process	under	BP	allMat
GO:0009889	1.87e-05	0.666476	171.578	127	726	regulation of biosynthetic process	under	BP	allMat
GO:0051171	1.89e-05	0.67109	177.25	132	750	regulation of nitrogen compound metabolic process	under	BP	allMat
GO:0031326	2.04e-05	0.667689	171.342	127	725	regulation of cellular biosynthetic process	under	BP	allMat
GO:0008152	2.06e-05	0.814644	1467.63	1385	6210	metabolic process	under	BP	allMat
GO:0010556	2.23e-05	0.668907	171.105	127	724	regulation of macromolecule biosynthetic process	under	BP	allMat
GO:2000112	2.23e-05	0.668907	171.105	127	724	regulation of cellular macromolecule biosynthetic process	under	BP	allMat
GO:0016998	3.47e-05	0	8.98067	0	38	cell wall macromolecule catabolic process	under	BP	allMat
GO:0019058	3.49e-05	0.116725	13.471	2	57	viral life cycle	under	BP	allMat
GO:0031323	3.83e-05	0.68368	178.668	135	756	regulation of cellular metabolic process	under	BP	allMat
GO:0019219	4.41e-05	0.678795	169.215	127	716	regulation of nucleobase-containing compound metabolic process	under	BP	allMat
GO:0006022	5.83e-05	0.332094	27.651	11	117	aminoglycan metabolic process	under	BP	allMat
GO:0071554	6.09e-05	0.0713985	10.8713	1	46	cell wall organization or biogenesis	under	BP	allMat
GO:0060255	8.47e-05	0.699573	181.977	140	770	regulation of macromolecule metabolic process	under	BP	allMat
GO:0051252	9.04e-05	0.687126	163.779	124	693	regulation of RNA metabolic process	under	BP	allMat
GO:0019222	9.31e-05	0.703341	185.049	143	783	regulation of metabolic process	under	BP	allMat
GO:0044036	0.0001004	0.0747399	10.3987	1	44	cell wall macromolecule metabolic process	under	BP	allMat
GO:1903506	0.000106468	0.689753	163.306	124	691	regulation of nucleic acid-templated transcription	under	BP	allMat
GO:0006355	0.000106468	0.689753	163.306	124	691	regulation of transcription, DNA-templated	under	BP	allMat
GO:2001141	0.000106468	0.689753	163.306	124	691	regulation of RNA biosynthetic process	under	BP	allMat
GO:0032774	0.000158995	0.716824	191.194	150	809	RNA biosynthetic process	under	BP	allMat
GO:0034654	0.000161475	0.748605	253.822	207	1074	nucleobase-containing compound biosynthetic process	under	BP	allMat
GO:0030203	0.000170702	0.175165	13.7073	3	58	glycosaminoglycan metabolic process	under	BP	allMat
GO:0000270	0.00018183	0.133876	11.8167	2	50	peptidoglycan metabolic process	under	BP	allMat
GO:0006261	0.00021297	0.178433	13.471	3	57	DNA-dependent DNA replication	under	BP	allMat
GO:0006351	0.000247277	0.724059	189.776	150	803	transcription, DNA-templated	under	BP	allMat
GO:0097659	0.000247277	0.724059	189.776	150	803	nucleic acid-templated transcription	under	BP	allMat
GO:0010468	0.000261728	0.713283	171.814	134	727	regulation of gene expression	under	BP	allMat
GO:0006352	0.000277729	0.217696	14.889	4	63	DNA-templated transcription, initiation	under	BP	allMat
GO:1901136	0.000284876	0.295452	19.6157	7	83	carbohydrate derivative catabolic process	under	BP	allMat
GO:0019068	0.000302708	0	7.09	0	30	virion assembly	under	BP	allMat
GO:0006412	0.000832312	0.668523	100.678	74	426	translation	under	BP	allMat
GO:0071103	0.000891798	0.440988	29.3053	15	124	DNA conformation change	under	BP	allMat
GO:0006518	0.00091075	0.679929	107.295	80	454	peptide metabolic process	under	BP	allMat
GO:0007018	0.000924242	0.479072	34.5047	19	146	microtubule-based movement	under	BP	allMat
GO:0009394	0.000929359	0.0946404	8.27167	1	35	2'-deoxyribonucleotide metabolic process	under	BP	allMat
GO:0016485	0.000929359	0.0946404	8.27167	1	35	protein processing	under	BP	allMat
GO:0019692	0.000929359	0.0946404	8.27167	1	35	deoxyribose phosphate metabolic process	under	BP	allMat
GO:0009057	0.00106684	0.561979	50.5753	32	214	macromolecule catabolic process	under	BP	allMat
GO:0051604	0.0011442	0.160827	9.926	2	42	protein maturation	under	BP	allMat
GO:0009219	0.00118628	0.0975216	8.03534	1	34	pyrimidine deoxyribonucleotide metabolic process	under	BP	allMat
GO:0043043	0.00122834	0.682309	103.041	77	436	peptide biosynthetic process	under	BP	allMat
GO:0043604	0.00138463	0.689636	106.114	80	449	amide biosynthetic process	under	BP	allMat
GO:0009262	0.001434	0.164974	9.68967	2	41	deoxyribonucleotide metabolic process	under	BP	allMat
GO:0010467	0.00143981	0.814562	354.027	309	1498	gene expression	under	BP	allMat
GO:0019438	0.00150667	0.791858	263.512	224	1115	aromatic compound biosynthetic process	under	BP	allMat
GO:0007017	0.00177759	0.593184	54.3567	36	230	microtubule-based process	under	BP	allMat
GO:0006928	0.00199319	0.537436	39.4677	24	167	movement of cell or subcellular component	under	BP	allMat
GO:0009129	0.00201024	0	5.43567	0	23	pyrimidine nucleoside monophosphate metabolic process	under	BP	allMat
GO:0009130	0.00201024	0	5.43567	0	23	pyrimidine nucleoside monophosphate biosynthetic process	under	BP	allMat
GO:0006323	0.00257492	0.437666	23.6333	12	100	DNA packaging	under	BP	allMat
GO:0009605	0.00280477	0.229792	10.635	3	45	response to external stimulus	under	BP	allMat
GO:1901362	0.00320935	0.809481	270.838	234	1146	organic cyclic compound biosynthetic process	under	BP	allMat
GO:0018130	0.00329357	0.809052	267.529	231	1132	heterocycle biosynthetic process	under	BP	allMat
GO:0018142	0.00345077	0.235429	10.3987	3	44	protein-DNA covalent cross-linking	under	BP	allMat
GO:0018143	0.00345077	0.235429	10.3987	3	44	nucleic acid-protein covalent cross-linking	under	BP	allMat
GO:0022904	0.00345177	0	4.963	0	21	respiratory electron transport chain	under	BP	allMat
GO:0030908	0.00345177	0	4.963	0	21	protein splicing	under	BP	allMat
GO:0009157	0.00345177	0	4.963	0	21	deoxyribonucleoside monophosphate biosynthetic process	under	BP	allMat
GO:0009176	0.00345177	0	4.963	0	21	pyrimidine deoxyribonucleoside monophosphate metabolic process	under	BP	allMat
GO:0009177	0.00345177	0	4.963	0	21	pyrimidine deoxyribonucleoside monophosphate biosynthetic process	under	BP	allMat
GO:0046073	0.00345177	0	4.963	0	21	dTMP metabolic process	under	BP	allMat
GO:0006231	0.00345177	0	4.963	0	21	dTMP biosynthetic process	under	BP	allMat
GO:0051259	0.00435994	0.189364	8.508	2	36	protein complex oligomerization	under	BP	allMat
GO:0016539	0.00452291	0	4.72667	0	20	intein-mediated protein splicing	under	BP	allMat
GO:1901565	0.00506282	0.629928	53.175	37	225	organonitrogen compound catabolic process	under	BP	allMat
GO:0048193	0.00542546	0.195129	8.27167	2	35	Golgi vesicle transport	under	BP	allMat
GO:0043603	0.00567143	0.739209	112.967	90	478	cellular amide metabolic process	under	BP	allMat
GO:1901135	0.00585189	0.730411	103.987	82	440	carbohydrate derivative metabolic process	under	BP	allMat
GO:0009123	0.00666519	0.485513	23.397	13	99	nucleoside monophosphate metabolic process	under	BP	allMat
GO:0045333	0.00714384	0.335133	12.5257	5	53	cellular respiration	under	BP	allMat
GO:0015985	0.00776476	0	4.254	0	18	energy coupled proton transport, down electrochemical gradient	under	BP	allMat
GO:0015986	0.00776476	0	4.254	0	18	ATP synthesis coupled proton transport	under	BP	allMat
GO:0009263	0.0102567	0.134257	5.90834	1	25	deoxyribonucleotide biosynthetic process	under	BP	allMat
GO:0009265	0.0102567	0.134257	5.90834	1	25	2'-deoxyribonucleotide biosynthetic process	under	BP	allMat
GO:0009221	0.0102567	0.134257	5.90834	1	25	pyrimidine deoxyribonucleotide biosynthetic process	under	BP	allMat
GO:0046385	0.0102567	0.134257	5.90834	1	25	deoxyribose phosphate biosynthetic process	under	BP	allMat
GO:1901566	0.0113225	0.810894	188.358	162	797	organonitrogen compound biosynthetic process	under	BP	allMat
GO:0015833	0.011416	0.641213	45.376	32	192	peptide transport	under	BP	allMat
GO:0015031	0.0114744	0.637173	44.1943	31	187	protein transport	under	BP	allMat
GO:0042886	0.0124999	0.649099	46.3213	33	196	amide transport	under	BP	allMat
GO:0051260	0.0128191	0.222165	7.32634	2	31	protein homooligomerization	under	BP	allMat
GO:0009124	0.0128661	0.472875	18.434	10	78	nucleoside monophosphate biosynthetic process	under	BP	allMat
GO:0032775	0.0129634	0.140114	5.672	1	24	DNA methylation on adenine	under	BP	allMat
GO:0042493	0.014117	0.284171	8.74434	3	37	response to drug	under	BP	allMat
GO:0022900	0.0158282	0.230131	7.09	2	30	electron transport chain	under	BP	allMat
GO:0006270	0.0158282	0.230131	7.09	2	30	DNA replication initiation	under	BP	allMat
GO:0046348	0.0163618	0.146502	5.43567	1	23	amino sugar catabolic process	under	BP	allMat
GO:1901072	0.0163618	0.146502	5.43567	1	23	glucosamine-containing compound catabolic process	under	BP	allMat
GO:0006032	0.0163618	0.146502	5.43567	1	23	chitin catabolic process	under	BP	allMat
GO:0051276	0.0165955	0.68566	53.6477	40	227	chromosome organization	under	BP	allMat
GO:0046034	0.0172791	0.451588	15.3617	8	65	ATP metabolic process	under	BP	allMat
GO:0070972	0.0174618	0	3.545	0	15	protein localization to endoplasmic reticulum	under	BP	allMat
GO:0045184	0.0200058	0.670107	45.1397	33	191	establishment of protein localization	under	BP	allMat
GO:0009162	0.0206204	0.1535	5.19933	1	22	deoxyribonucleoside monophosphate metabolic process	under	BP	allMat
GO:0008104	0.021004	0.683313	48.4483	36	205	protein localization	under	BP	allMat
GO:0033036	0.0239783	0.710749	56.011	43	237	macromolecule localization	under	BP	allMat
GO:0030163	0.0240752	0.604566	28.36	19	120	protein catabolic process	under	BP	allMat
GO:0009101	0.0247271	0.490897	16.0707	9	68	glycoprotein biosynthetic process	under	BP	allMat
GO:0006220	0.0292357	0.459953	13.2347	7	56	pyrimidine nucleotide metabolic process	under	BP	allMat
GO:0042773	0.0299681	0	3.07233	0	13	ATP synthesis coupled electron transport	under	BP	allMat
GO:0006119	0.0299681	0	3.07233	0	13	oxidative phosphorylation	under	BP	allMat
GO:0016043	0.0305418	0.814809	132.583	114	561	cellular component organization	under	BP	allMat
GO:0006888	0.0325897	0.169704	4.72667	1	20	ER to Golgi vesicle-mediated transport	under	BP	allMat
GO:1901071	0.035895	0.495349	14.18	8	60	glucosamine-containing compound metabolic process	under	BP	allMat
GO:0015980	0.035895	0.495349	14.18	8	60	energy derivation by oxidation of organic compounds	under	BP	allMat
GO:0070085	0.0374625	0.517408	15.3617	9	65	glycosylation	under	BP	allMat
GO:0009211	0.0392575	0	2.836	0	12	pyrimidine deoxyribonucleoside triphosphate metabolic process	under	BP	allMat
GO:0009200	0.0392575	0	2.836	0	12	deoxyribonucleoside triphosphate metabolic process	under	BP	allMat
GO:0006487	0.0392575	0	2.836	0	12	protein N-linked glycosylation	under	BP	allMat
GO:0046080	0.0392575	0	2.836	0	12	dUTP metabolic process	under	BP	allMat
GO:0043543	0.0392575	0	2.836	0	12	protein acylation	under	BP	allMat
GO:0006275	0.040858	0.179156	4.49033	1	19	regulation of DNA replication	under	BP	allMat
GO:0006030	0.0413066	0.505131	13.9437	8	59	chitin metabolic process	under	BP	allMat
GO:0043413	0.042863	0.526887	15.1253	9	64	macromolecule glycosylation	under	BP	allMat
GO:0006486	0.042863	0.526887	15.1253	9	64	protein glycosylation	under	BP	allMat
GO:0019079	0.0440905	0.280351	5.90834	2	25	viral genome replication	under	BP	allMat
GO:0009141	0.0462388	0.60072	21.0337	14	89	nucleoside triphosphate metabolic process	under	BP	allMat
GO:0006753	0.0463102	0.770984	68.3004	56	289	nucleoside phosphate metabolic process	under	BP	allMat

## Sheet: CC_under
GOCCID	Pvalue	OddsRatio	ExpCount	Count	Size	Term	test	ontology	subset
GO:0019012	5.34e-13	0.0684598	32.3418	3	126	virion	under	CC	allMat
GO:0044423	5.34e-13	0.0684598	32.3418	3	126	virion part	under	CC	allMat
GO:0019028	7.08e-13	0.0690401	32.0852	3	125	viral capsid	under	CC	allMat
GO:0005737	6.43e-06	0.683728	243.334	191	948	cytoplasm	under	CC	allMat
GO:0044444	4.42e-05	0.672898	174.03	133	678	cytoplasmic part	under	CC	allMat
GO:0005840	0.000146156	0.560978	71.1007	46	277	ribosome	under	CC	allMat
GO:1905368	0.000158278	0.130279	11.8073	2	46	peptidase complex	under	CC	allMat
GO:1905369	0.000172754	0.0775503	9.75389	1	38	endopeptidase complex	under	CC	allMat
GO:0000502	0.000172754	0.0775503	9.75389	1	38	proteasome complex	under	CC	allMat
GO:0005839	0.000240739	0	7.18708	0	28	proteasome core complex	under	CC	allMat
GO:0098796	0.000813792	0.557441	53.133	34	207	membrane protein complex	under	CC	allMat
GO:1990904	0.00133162	0.646709	82.6514	60	322	ribonucleoprotein complex	under	CC	allMat
GO:0032991	0.00283463	0.79605	271.055	236	1056	protein-containing complex	under	CC	allMat
GO:0030117	0.00627858	0.326461	12.5774	5	49	membrane coat	under	CC	allMat
GO:0048475	0.00627858	0.326461	12.5774	5	49	coated membrane	under	CC	allMat
GO:0043228	0.00712406	0.778751	165.559	140	645	non-membrane-bounded organelle	under	CC	allMat
GO:0043232	0.00712406	0.778751	165.559	140	645	intracellular non-membrane-bounded organelle	under	CC	allMat
GO:0044424	0.00892008	0.851015	487.951	452	1901	intracellular part	under	CC	allMat
GO:0045259	0.0116005	0	3.85022	0	15	proton-transporting ATP synthase complex	under	CC	allMat
GO:0005798	0.0124576	0.137229	5.64699	1	22	Golgi-associated vesicle	under	CC	allMat
GO:0030660	0.0124576	0.137229	5.64699	1	22	Golgi-associated vesicle membrane	under	CC	allMat
GO:0005667	0.013584	0.22155	7.18708	2	28	transcription factor complex	under	CC	allMat
GO:0030313	0.0156215	0	3.59354	0	14	cell envelope	under	CC	allMat
GO:0019773	0.0210348	0	3.33686	0	13	proteasome core complex, alpha-subunit complex	under	CC	allMat
GO:1902494	0.0309913	0.738623	64.9404	52	253	catalytic complex	under	CC	allMat
GO:0030659	0.0338522	0.262115	6.16035	2	24	cytoplasmic vesicle membrane	under	CC	allMat
GO:0012506	0.0338522	0.262115	6.16035	2	24	vesicle membrane	under	CC	allMat
GO:0005622	0.0364141	0.886397	528.763	501	2060	intracellular	under	CC	allMat
GO:0005623	0.0368696	0.888279	587.03	559	2287	cell	under	CC	allMat
GO:0044464	0.0368696	0.888279	587.03	559	2287	cell part	under	CC	allMat
GO:0019866	0.0405825	0.384204	8.72716	4	34	organelle inner membrane	under	CC	allMat
GO:0030120	0.0422545	0.274671	5.90367	2	23	vesicle coat	under	CC	allMat
GO:0030662	0.0422545	0.274671	5.90367	2	23	coated vesicle membrane	under	CC	allMat
GO:0098800	0.0441039	0.180356	4.36358	1	17	inner mitochondrial membrane protein complex	under	CC	allMat
GO:0005743	0.0489169	0.39756	8.47048	4	33	mitochondrial inner membrane	under	CC	allMat
GO:0015630	0.0494476	0.67533	32.3418	24	126	microtubule cytoskeleton	under	CC	allMat
