# Supplementary material for: Combined transcriptome and proteome profiling reveals specific molecular brain signatures for sex, maturation and circalunar clock phase
Source: eLife. 2019 Feb 15;8:e41556. doi: 10.7554/eLife.41556 (PMC6377233; doi:10.7554/eLife.41556)
Supplement: Figure 3—source data 10. — This file contains the over- and under-representet GO-terms for the sex comparison on transcript level. Tabs for each of the three ontologies, i.e. Molecular Function, Biological Process, and Cellular Compartment. [file elife-41556-fig3-data10.xlsx]

## Sheet: MF_OVER
GOMMFID	Pvalue	OddsRatio	ExpCount	Count	Size	Term	test	ontology	subset
GO:0001614	0.00121623	17.3433	0.219331	3	14	purinergic nucleotide receptor activity	over	MF	allSex
GO:0004931	0.00121623	17.3433	0.219331	3	14	extracellularly ATP-gated cation channel activity	over	MF	allSex
GO:0004198	0.00533371	9.53305	0.360329	3	23	calcium-dependent cysteine-type endopeptidase activity	over	MF	allSex
GO:0005509	0.00583446	2.09004	8.58524	17	548	calcium ion binding	over	MF	allSex
GO:0008233	0.00628683	1.98641	10.1049	19	645	peptidase activity	over	MF	allSex
GO:0004639	0.0156665	Inf	0.0156665	1	1	phosphoribosylaminoimidazolesuccinocarboxamide synthase activity	over	MF	allSex
GO:0004126	0.0156665	Inf	0.0156665	1	1	cytidine deaminase activity	over	MF	allSex
GO:0008892	0.0156665	Inf	0.0156665	1	1	guanine deaminase activity	over	MF	allSex
GO:0004044	0.0156665	Inf	0.0156665	1	1	amidophosphoribosyltransMFerase activity	over	MF	allSex
GO:0005215	0.0157888	1.66333	15.8388	25	1011	transporter activity	over	MF	allSex
GO:0008234	0.0195842	2.9725	2.11498	6	135	cysteine-type peptidase activity	over	MF	allSex
GO:0022839	0.0250473	2.37362	3.50929	8	224	ion gated channel activity	over	MF	allSex
GO:0005201	0.0253824	9.04396	0.250664	2	16	extracellular matrix structural constituent	over	MF	allSex
GO:0016810	0.0260387	3.75809	1.12343	4	72	hydrolase activity, acting on carbon-nitrogen (but not peptide) bonds	over	MF	allSex
GO:0016849	0.0288044	3.63498	1.15932	4	74	phosphorus-oxygen lyase activity	over	MF	allSex
GO:0004175	0.0302737	1.92244	6.48593	12	414	endopeptidase activity	over	MF	allSex
GO:0097027	0.0310886	63.0936	0.031333	1	2	ubiquitin-protein transMFerase activator activity	over	MF	allSex
GO:0004332	0.0310886	63.0936	0.031333	1	2	MFructose-bisphosphate aldolase activity	over	MF	allSex
GO:0004415	0.0310886	63.0936	0.031333	1	2	hyalurononglucosaminidase activity	over	MF	allSex
GO:0010997	0.0310886	63.0936	0.031333	1	2	anaphase-promoting complex binding	over	MF	allSex
GO:0008324	0.0323121	1.96479	5.81227	11	371	cation transmembrane transporter activity	over	MF	allSex
GO:0005230	0.032577	2.62335	2.38131	6	152	extracellular ligand-gated ion channel activity	over	MF	allSex
GO:0003824	0.0372044	1.27678	94.1243	108	6008	catalytic activity	over	MF	allSex
GO:0022834	0.038244	2.51876	2.47531	6	158	ligand-gated channel activity	over	MF	allSex
GO:0015318	0.045635	1.67939	9.2589	15	591	inorganic molecular entity transmembrane transporter activity	over	MF	allSex
GO:0016813	0.04627	31.5447	0.0469995	1	3	hydrolase activity, acting on carbon-nitrogen (but not peptide) bonds, in linear amidines	over	MF	allSex
GO:0003978	0.04627	31.5447	0.0469995	1	3	UDP-glucose 4-epimerase activity	over	MF	allSex
GO:0004064	0.04627	31.5447	0.0469995	1	3	arylesterase activity	over	MF	allSex
GO:0043546	0.04627	31.5447	0.0469995	1	3	molybdopterin coMFactor binding	over	MF	allSex
GO:0016675	0.0498328	6.02646	0.360329	2	23	oxidoreductase activity, acting on a heme group oMF donors	over	MF	allSex
GO:0004129	0.0498328	6.02646	0.360329	2	23	cytochrome-c oxidase activity	over	MF	allSex
							over

## Sheet: BP_OVER
GOBPID	Pvalue	OddsRatio	ExpCount	Count	Size	Term	test	ontology	subset
GO:0022607	0.000616223	3.52166	3.41249	11	199	cellular component assembly	over	BP	allSex
GO:0034622	0.00127318	4.66335	1.64623	7	96	cellular protein-containing complex assembly	over	BP	allSex
GO:0071824	0.00141715	9.37342	0.497298	4	29	protein-DNA complex subunit organization	over	BP	allSex
GO:0033198	0.00156844	15.9024	0.240075	3	14	response to ATP	over	BP	allSex
GO:0031667	0.00156844	15.9024	0.240075	3	14	response to nutrient levels	over	BP	allSex
GO:0006270	0.00161355	9.01194	0.514446	4	30	DNA replication initiation	over	BP	allSex
GO:0055085	0.00247381	2.0845	11.5236	22	672	transmembrane transport	over	BP	allSex
GO:0010243	0.00282143	12.4907	0.291519	3	17	response to organonitrogen compound	over	BP	allSex
GO:0006144	0.00419024	28.9969	0.102889	2	6	purine nucleobase metabolic process	over	BP	allSex
GO:0001578	0.00419024	28.9969	0.102889	2	6	microtubule bundle formation	over	BP	allSex
GO:0006334	0.0052481	9.71091	0.360112	3	21	nucleosome assembly	over	BP	allSex
GO:0006333	0.0068154	8.73796	0.394409	3	23	chromatin assembly or disassembly	over	BP	allSex
GO:0006260	0.00893541	2.24537	6.17335	13	360	DNA replication	over	BP	allSex
GO:0006508	0.0112381	1.85659	11.5579	20	674	proteolysis	over	BP	allSex
GO:0055086	0.0131087	2.2038	5.77894	12	337	nucleobase-containing small molecule metabolic process	over	BP	allSex
GO:0000915	0.0171482	Inf	0.0171482	1	1	actomyosin contractile ring assembly	over	BP	allSex
GO:0046113	0.0171482	Inf	0.0171482	1	1	nucleobase catabolic process	over	BP	allSex
GO:0046133	0.0171482	Inf	0.0171482	1	1	pyrimidine ribonucleoside catabolic process	over	BP	allSex
GO:0032506	0.0171482	Inf	0.0171482	1	1	cytokinetic process	over	BP	allSex
GO:0009164	0.0171482	Inf	0.0171482	1	1	nucleoside catabolic process	over	BP	allSex
GO:0032981	0.0171482	Inf	0.0171482	1	1	mitochondrial respiratory chain complex I assembly	over	BP	allSex
GO:0019464	0.0171482	Inf	0.0171482	1	1	glycine decarboxylation via glycine cleavage system	over	BP	allSex
GO:0030866	0.0171482	Inf	0.0171482	1	1	cortical actin cytoskeleton organization	over	BP	allSex
GO:0046087	0.0171482	Inf	0.0171482	1	1	cytidine metabolic process	over	BP	allSex
GO:0006147	0.0171482	Inf	0.0171482	1	1	guanine catabolic process	over	BP	allSex
GO:0072523	0.0171482	Inf	0.0171482	1	1	purine-containing compound catabolic process	over	BP	allSex
GO:0072529	0.0171482	Inf	0.0171482	1	1	pyrimidine-containing compound catabolic process	over	BP	allSex
GO:0034080	0.0171482	Inf	0.0171482	1	1	CENP-A containing nucleosome assembly	over	BP	allSex
GO:0009972	0.0171482	Inf	0.0171482	1	1	cytidine deamination	over	BP	allSex
GO:0009117	0.0186084	2.26422	4.66431	10	272	nucleotide metabolic process	over	BP	allSex
GO:0007049	0.0190353	3.01242	2.10923	6	123	cell cycle	over	BP	allSex
GO:0006091	0.0225568	3.28933	1.61193	5	94	generation of precursor metabolites and energy	over	BP	allSex
GO:0006213	0.0265107	8.91364	0.257223	2	15	pyrimidine nucleoside metabolic process	over	BP	allSex
GO:0090407	0.0320536	2.1512	4.38994	9	256	organophosphate biosynthetic process	over	BP	allSex
GO:0044282	0.0328069	4.59016	0.703076	3	41	small molecule catabolic process	over	BP	allSex
GO:0006996	0.033425	1.8541	7.37373	13	430	organelle organization	over	BP	allSex
GO:0051301	0.0335806	7.72352	0.291519	2	17	cell division	over	BP	allSex
GO:0030317	0.0340041	57.6585	0.0342964	1	2	flagellated sperm motility	over	BP	allSex
GO:0031398	0.0340041	57.6585	0.0342964	1	2	positive regulation of protein ubiquitination	over	BP	allSex
GO:0051438	0.0340041	57.6585	0.0342964	1	2	regulation of ubiquitin-protein transferase activity	over	BP	allSex
GO:1904668	0.0340041	57.6585	0.0342964	1	2	positive regulation of ubiquitin protein ligase activity	over	BP	allSex
GO:1990426	0.0340041	57.6585	0.0342964	1	2	mitotic recombination-dependent replication fork processing	over	BP	allSex
GO:1902298	0.0340041	57.6585	0.0342964	1	2	cell cycle DNA replication maintenance of fidelity	over	BP	allSex
GO:0036158	0.0340041	57.6585	0.0342964	1	2	outer dynein arm assembly	over	BP	allSex
GO:1903320	0.0340041	57.6585	0.0342964	1	2	regulation of protein modification by small protein conjugation or removal	over	BP	allSex
GO:0006884	0.0340041	57.6585	0.0342964	1	2	cell volume homeostasis	over	BP	allSex
GO:1901565	0.03582	2.21863	3.77848	8	223	organonitrogen compound catabolic process	over	BP	allSex
GO:0014070	0.0379978	3.33168	1.26897	4	74	response to organic cyclic compound	over	BP	allSex
GO:0009190	0.0379978	3.33168	1.26897	4	74	cyclic nucleotide biosynthetic process	over	BP	allSex
GO:0098655	0.0392387	2.8104	1.86915	5	109	cation transmembrane transport	over	BP	allSex
GO:0009605	0.0415748	4.15123	0.771669	3	45	response to external stimulus	over	BP	allSex
GO:0009124	0.0447278	3.15024	1.33756	4	78	nucleoside monophosphate biosynthetic process	over	BP	allSex
GO:0022904	0.0496004	6.09493	0.360112	2	21	respiratory electron transport chain	over	BP	allSex
GO:1901606	0.0496004	6.09493	0.360112	2	21	alpha-amino acid catabolic process	over	BP	allSex
GO:0051640	0.0496004	6.09493	0.360112	2	21	organelle localization	over	BP	allSex

## Sheet: CC_OVER
GOCCID	Pvalue	OddsRatio	ExpCount	Count	Size	Term	test	ontology	subset
GO:0042555	0.00148601	16.8557	0.23933	3	12	MCM complex	over	CC	allSex
GO:0000775	0.0035695	11.6598	0.319107	3	16	chromosome, centromeric region	over	CC	allSex
GO:0005581	0.0101965	16.6939	0.159553	2	8	collagen trimer	over	CC	allSex
GO:0005960	0.0199442	Inf	0.0199442	1	1	glycine cleavage complex	over	CC	allSex
GO:0000502	0.039238	4.31134	0.757878	3	38	proteasome complex	over	CC	allSex
GO:0034715	0.0394944	49.6263	0.0398883	1	2	pICln-Sm protein complex	over	CC	allSex
GO:0034709	0.0394944	49.6263	0.0398883	1	2	methylosome	over	CC	allSex
GO:0036157	0.0394944	49.6263	0.0398883	1	2	outer dynein arm	over	CC	allSex
GO:0008540	0.0394944	49.6263	0.0398883	1	2	proteasome regulatory particle, base subcomplex	over	CC	allSex
GO:0031932	0.0394944	49.6263	0.0398883	1	2	TORC2 complex	over	CC	allSex
GO:0044427	0.0468336	2.69877	1.97447	5	99	chromosomal part	over	CC	allSex
							over

## Sheet: MF_under
GOMFID	Pvalue	OddsRatio	ExpCount	Count	Size	Term	test	ontology	subset
GO:0003676	0.000216418	0.488025	44.1168	24	2816	nucleic acid binding	under	MF	allSex
GO:0003723	0.00505055	0.132025	7.26925	1	464	RNA binding	under	MF	allSex
GO:0097159	0.00836504	0.689025	71.9562	55	4593	organic cyclic compound binding	under	MF	allSex
GO:1901363	0.00851532	0.689682	71.9092	55	4590	heterocyclic compound binding	under	MF	allSex

## Sheet: BP_under
GOBPID	Pvalue	OddsRatio	ExpCount	Count	Size	Term	test	ontology	subset
GO:0010467	0.00100368	0.420711	25.688	12	1498	gene expression	under	BP	allSex
GO:0016070	0.00695133	0.461911	20.0462	10	1169	RNA metabolic process	under	BP	allSex
GO:0090304	0.0072723	0.589391	38.1376	25	2224	nucleic acid metabolic process	under	BP	allSex
GO:0050789	0.00773311	0.581966	35.7026	23	2082	regulation of biological process	under	BP	allSex
GO:0050794	0.0114844	0.599344	34.8966	23	2035	regulation of cellular process	under	BP	allSex
GO:0015074	0.0134249	0	4.21846	0	246	DNA integration	under	BP	allSex
GO:0006629	0.0178308	0	3.94409	0	230	lipid metabolic process	under	BP	allSex
GO:0023052	0.0250148	0.553901	20.3206	12	1185	signaling	under	BP	allSex
GO:0007165	0.0291097	0.5632	20.0291	12	1168	signal transduction	under	BP	allSex
GO:0065007	0.0320489	0.67018	37.1087	27	2164	biological regulation	under	BP	allSex
GO:0007264	0.0325385	0	3.36105	0	196	small GTPase mediated signal transduction	under	BP	allSex
GO:0034660	0.0325385	0	3.36105	0	196	ncRNA metabolic process	under	BP	allSex
GO:0043603	0.0327736	0.350175	8.19684	3	478	cellular amide metabolic process	under	BP	allSex
GO:0007154	0.0373926	0.590747	20.7322	13	1209	cell communication	under	BP	allSex
GO:0034641	0.0435885	0.725744	51.4618	41	3001	cellular nitrogen compound metabolic process	under	BP	allSex
GO:0006518	0.0439902	0.369796	7.78528	3	454	peptide metabolic process	under	BP	allSex
GO:0044260	0.0466255	0.736368	55.4916	45	3236	cellular macromolecule metabolic process	under	BP	allSex
GO:0043604	0.0467305	0.374149	7.69954	3	449	amide biosynthetic process	under	BP	allSex

## Sheet: CC_under
GOCCID	Pvalue	OddsRatio	ExpCount	Count	Size	Term	test	ontology	subset
GO:0044428	0.0197734	0	3.80933	0	191	nuclear part	under	CC	allSex
GO:0012505	0.030671	0	3.39051	0	170	endomembrane system	under	CC	allSex
