# Supplementary material for: Combined transcriptome and proteome profiling reveals specific molecular brain signatures for sex, maturation and circalunar clock phase
Source: eLife. 2019 Feb 15;8:e41556. doi: 10.7554/eLife.41556 (PMC6377233; doi:10.7554/eLife.41556)
Supplement: Figure 3—source data 11. — This file contains the over- and under-representet GO-terms for the lunar comparison on transcript level. Tabs for each of the three ontologies, i.e. Molecular Function, Biological Process, and Cellular Compartment. [file elife-41556-fig3-data11.xlsx]

## Sheet: MF_OVER
GOMFID	Pvalue	OddsRatio	ExpCount	Count	Size	Term	test	ontology	subset
GO:0016849	0.00152197	41.6111	0.0589485	2	74	phosphorus-oxygen lyase activity	over	MF	allLun
GO:0005158	0.0071485	170.955	0.00716941	1	9	insulin receptor binding	over	MF	allLun
GO:0004803	0.0213052	52.5385	0.0215082	1	27	transposase activity	over	MF	allLun
GO:0004672	0.0371716	7.55876	0.310674	2	390	protein kinase activity	over	MF	allLun

## Sheet: BP_OVER
GOBPID	Pvalue	OddsRatio	ExpCount	Count	Size	Term	test	type	subset
GO:0009190	0.00158566	44.1759	0.0615257	2	74	cyclic nucleotide biosynthetic process	over	BP	allLun
GO:0043248	0.00580731	228.762	0.00582	1	7	proteasome assembly	over	BP	allLun
GO:1901293	0.0126204	14.783	0.177926	2	214	nucleoside phosphate biosynthetic process	over	BP	allLun
GO:0007160	0.0181523	65.2585	0.0182914	1	22	cell-matrix adhesion	over	BP	allLun
GO:0009117	0.0199196	11.5358	0.226148	2	272	nucleotide metabolic process	over	BP	allLun
GO:0006313	0.0230526	50.7249	0.02328	1	28	transposition, DNA-mediated	over	BP	allLun
GO:0055086	0.0297773	9.23284	0.280191	2	337	nucleobase-containing small molecule metabolic process	over	BP	allLun
GO:0006468	0.0345311	8.49495	0.303471	2	365	protein phosphorylation	over	BP	allLun
GO:0019637	0.0350577	8.42259	0.305965	2	368	organophosphate metabolic process	over	BP	allLun

## Sheet: CC_OVER
GOCCID	Pvalue	OddsRatio	ExpCount	Count	Size	Term	test	ontology	subset
GO:0005921	0.0134972	104.042	0.013562	1	17	gap junction	over	CC	allLun
GO:0030054	0.0198014	69.25	0.0199442	1	25	cell junction	over	CC	allLun

## Sheet: MF_under
GOMFID	Pvalue	OddsRatio	ExpCount	Count	Size	Term	test	ontology	subset

## Sheet: BP_under
GOBPID	Pvalue	OddsRatio	ExpCount	Count	Size	Term	test	ontology	subset

## Sheet: CC_under
GOCCID	Pvalue	OddsRatio	ExpCount	Count	Size	Term	test	ontology	subset
