# Supplementary material for: Combined transcriptome and proteome profiling reveals specific molecular brain signatures for sex, maturation and circalunar clock phase
Source: eLife. 2019 Feb 15;8:e41556. doi: 10.7554/eLife.41556 (PMC6377233; doi:10.7554/eLife.41556)
Supplement: Figure 3—source data 12. — This file contains those over-represented GO-terms which are unique to a given comparison on transcript level, i.e. maturation, sex, or lunar, with p-values for each of the three comparision. [file elife-41556-fig3-data12.xlsx]

## Sheet: allMaturation
frame.go_id	Term	Pvalue_Mat	Pvalue_Sex	Pvalue_Lun	ontology
GO:0005515	protein binding	2.05e-21	1	1	MF
GO:0051234	establishment of localization	5.84e-07	1	1	BP
GO:0016705	oxidoreductase activity, acting on paired donors, with incorporation or reduction of molecular oxygen	1.46e-06	1	1	MF
GO:0020037	heme binding	1.83e-05	1	1	MF
GO:0006811	ion transport	3.74e-05	1	1	BP
GO:0022838	substrate-specific channel activity	0.000115316	1	1	MF
GO:0055114	oxidation-reduction process	0.000151497	1	1	BP
GO:0008509	anion transmembrane transporter activity	0.000170105	1	1	MF
GO:0022803	passive transmembrane transporter activity	0.000215295	1	1	MF
GO:0005452	inorganic anion exchanger activity	0.000268161	1	1	MF
GO:0005506	iron ion binding	0.000692194	1	1	MF
GO:0006396	RNA processing	0.000795263	1	1	BP
GO:0031123	RNA 3'-end processing	0.000968218	1	1	BP
GO:0016791	phosphatase activity	0.000988307	1	1	MF
GO:0051015	actin filament binding	0.0014449	1	1	MF
GO:0016021	integral component of membrane	0.00157714	1	1	CC
GO:0051537	2 iron, 2 sulfur cluster binding	0.00173561	1	1	MF
GO:0003684	damaged DNA binding	0.00203216	1	1	MF
GO:0004725	protein tyrosine phosphatase activity	0.00225607	1	1	MF
GO:0043401	steroid hormone mediated signaling pathway	0.00264023	1	1	BP
GO:0048545	response to steroid hormone	0.00264023	1	1	BP
GO:0071396	cellular response to lipid	0.00264023	1	1	BP
GO:0023052	signaling	0.00274761	1	1	BP
GO:0006470	protein dephosphorylation	0.00286174	1	1	BP
GO:0045211	postsynaptic membrane	0.00286397	1	1	CC
GO:0016614	oxidoreductase activity, acting on CH-OH group of donors	0.00300734	1	1	MF
GO:0006378	mRNA polyadenylation	0.00311333	1	1	BP
GO:0098656	anion transmembrane transport	0.00335415	1	1	BP
GO:0015171	amino acid transmembrane transporter activity	0.00338437	1	1	MF
GO:0031406	carboxylic acid binding	0.00338437	1	1	MF
GO:0032870	cellular response to hormone stimulus	0.00343091	1	1	BP
GO:0071407	cellular response to organic cyclic compound	0.00343091	1	1	BP
GO:0005507	copper ion binding	0.00343634	1	1	MF
GO:0098590	plasma membrane region	0.00414984	1	1	CC
GO:0006820	anion transport	0.00461093	1	1	BP
GO:0005342	organic acid transmembrane transporter activity	0.00497604	1	1	MF
GO:0007154	cell communication	0.00516621	1	1	BP
GO:0000178	exosome (RNase complex)	0.00522913	1	1	CC
GO:0003333	amino acid transmembrane transport	0.00678678	1	1	BP
GO:0006672	ceramide metabolic process	0.00742541	1	1	BP
GO:0036211	protein modification process	0.00749409	1	1	BP
GO:0004499	N,N-dimethylaniline monooxygenase activity	0.00761077	1	1	MF
GO:0044456	synapse part	0.00828241	1	1	CC
GO:0003707	steroid hormone receptor activity	0.00853162	1	1	MF
GO:0008083	growth factor activity	0.00866686	1	1	MF
GO:0006955	immune response	0.00922548	1	1	BP
GO:0007076	mitotic chromosome condensation	0.00997626	1	1	BP
GO:0005634	nucleus	0.0115778	1	1	CC
GO:0008289	lipid binding	0.0117794	1	1	MF
GO:0016020	membrane	0.0120043	1	1	CC
GO:0055080	cation homeostasis	0.0121977	1	1	BP
GO:0098771	inorganic ion homeostasis	0.0121977	1	1	BP
GO:0016180	snRNA processing	0.0126275	1	1	BP
GO:0018149	peptide cross-linking	0.0126275	1	1	BP
GO:0035435	phosphate ion transmembrane transport	0.0126275	1	1	BP
GO:0003810	protein-glutamine gamma-glutamyltransferase activity	0.0128488	1	1	MF
GO:0016878	acid-thiol ligase activity	0.0128488	1	1	MF
GO:0016054	organic acid catabolic process	0.0129834	1	1	BP
GO:0006536	glutamate metabolic process	0.0131867	1	1	BP
GO:0006597	spermine biosynthetic process	0.0131867	1	1	BP
GO:0004467	long-chain fatty acid-CoA ligase activity	0.0133688	1	1	MF
GO:0015278	calcium-release channel activity	0.0133688	1	1	MF
GO:0031409	pigment binding	0.0133688	1	1	MF
GO:0046873	metal ion transmembrane transporter activity	0.0135211	1	1	MF
GO:0003950	NAD+ ADP-ribosyltransferase activity	0.0140197	1	1	MF
GO:0007034	vacuolar transport	0.0148718	1	1	BP
GO:0005847	mRNA cleavage and polyadenylation specificity factor complex	0.0168822	1	1	CC
GO:0035556	intracellular signal transduction	0.017425	1	1	BP
GO:0005044	scavenger receptor activity	0.0177513	1	1	MF
GO:1903825	organic acid transmembrane transport	0.0182682	1	1	BP
GO:0016301	kinase activity	0.0192556	1	1	MF
GO:0051716	cellular response to stimulus	0.0194993	1	1	BP
GO:0061919	process utilizing autophagic mechanism	0.0200614	1	1	BP
GO:0022857	transmembrane transporter activity	0.0204871	1	1	MF
GO:0016072	rRNA metabolic process	0.0213529	1	1	BP
GO:0005730	nucleolus	0.0227205	1	1	CC
GO:0050660	flavin adenine dinucleotide binding	0.0230714	1	1	MF
GO:0019205	nucleobase-containing compound kinase activity	0.0237426	1	1	MF
GO:0006836	neurotransmitter transport	0.0278001	1	1	BP
GO:0033013	tetrapyrrole metabolic process	0.0289848	1	1	BP
GO:0006629	lipid metabolic process	0.0302579	1	1	BP
GO:0032040	small-subunit processome	0.0303965	1	1	CC
GO:0008514	organic anion transmembrane transporter activity	0.0305762	1	1	MF
GO:0006643	membrane lipid metabolic process	0.0306047	1	1	BP
GO:0015276	ligand-gated ion channel activity	0.0307149	1	1	MF
GO:0006471	protein ADP-ribosylation	0.0307985	1	1	BP
GO:0006779	porphyrin-containing compound biosynthetic process	0.0307985	1	1	BP
GO:1901361	organic cyclic compound catabolic process	0.0310092	1	1	BP
GO:0004448	isocitrate dehydrogenase activity	0.0313033	1	1	MF
GO:0005635	nuclear envelope	0.0313609	1	1	CC
GO:0031012	extracellular matrix	0.0329555	1	1	CC
GO:0070887	cellular response to chemical stimulus	0.0348801	1	1	BP
GO:0019899	enzyme binding	0.0353801	1	1	MF
GO:0009719	response to endogenous stimulus	0.0357556	1	1	BP
GO:0070647	protein modification by small protein conjugation or removal	0.036048	1	1	BP
GO:0004497	monooxygenase activity	0.0384076	1	1	MF
GO:0060070	canonical Wnt signaling pathway	0.0389733	1	1	BP
GO:0046700	heterocycle catabolic process	0.0390146	1	1	BP
GO:0008308	voltage-gated anion channel activity	0.0397081	1	1	MF
GO:0006664	glycolipid metabolic process	0.040349	1	1	BP
GO:0048878	chemical homeostasis	0.040349	1	1	BP
GO:0015291	secondary active transmembrane transporter activity	0.0411251	1	1	MF
GO:0016829	lyase activity	0.041743	1	1	MF
GO:0010256	endomembrane system organization	0.0421889	1	1	BP
GO:0046039	GTP metabolic process	0.0421889	1	1	BP
GO:0004197	cysteine-type endopeptidase activity	0.0426789	1	1	MF
GO:0070838	divalent metal ion transport	0.0427633	1	1	BP
GO:0015108	chloride transmembrane transporter activity	0.0430851	1	1	MF
GO:0009063	cellular amino acid catabolic process	0.0431921	1	1	BP
GO:0005978	glycogen biosynthetic process	0.043407	1	1	BP
GO:0006885	regulation of pH	0.043407	1	1	BP
GO:0010506	regulation of autophagy	0.043407	1	1	BP
GO:0017156	calcium ion regulated exocytosis	0.043407	1	1	BP
GO:0042073	intraciliary transport	0.043407	1	1	BP
GO:0042135	neurotransmitter catabolic process	0.043407	1	1	BP
GO:0044341	sodium-dependent phosphate transport	0.043407	1	1	BP
GO:0046185	aldehyde catabolic process	0.043407	1	1	BP
GO:0015711	organic anion transport	0.0438279	1	1	BP
GO:0004013	adenosylhomocysteinase activity	0.0439607	1	1	MF
GO:0015321	sodium-dependent phosphate transmembrane transporter activity	0.0439607	1	1	MF
GO:0015385	sodium:proton antiporter activity	0.0439607	1	1	MF
GO:0016801	hydrolase activity, acting on ether bonds	0.0439607	1	1	MF
GO:0019238	cyclohydrolase activity	0.0439607	1	1	MF
GO:0042162	telomeric DNA binding	0.0439607	1	1	MF
GO:0015085	calcium ion transmembrane transporter activity	0.0451718	1	1	MF
GO:0005328	neurotransmitter:sodium symporter activity	0.0456828	1	1	MF
GO:0005852	eukaryotic translation initiation factor 3 complex	0.0462299	1	1	CC
GO:0007015	actin filament organization	0.0466154	1	1	BP
GO:0007155	cell adhesion	0.0472488	1	1	BP
GO:0140096	catalytic activity, acting on a protein	0.0476205	1	1	MF
GO:0015294	solute:cation symporter activity	0.0499683	1	1	MF

## Sheet: allSex
frame.go_id	Term	Pvalue_Mat	Pvalue_Sex	Pvalue_Lun	ontology
GO:0022607	cellular component assembly	1	0.000616223	1	BP
GO:0001614	purinergic nucleotide receptor activity	1	0.00121623	1	MF
GO:0004931	extracellularly ATP-gated cation channel activity	1	0.00121623	1	MF
GO:0034622	cellular protein-containing complex assembly	1	0.00127318	1	BP
GO:0071824	protein-DNA complex subunit organization	1	0.00141715	1	BP
GO:0042555	MCM complex	1	0.00148601	1	CC
GO:0031667	response to nutrient levels	1	0.00156844	1	BP
GO:0033198	response to ATP	1	0.00156844	1	BP
GO:0006270	DNA replication initiation	1	0.00161355	1	BP
GO:0010243	response to organonitrogen compound	1	0.00282143	1	BP
GO:0000775	chromosome, centromeric region	1	0.0035695	1	CC
GO:0001578	microtubule bundle formation	1	0.00419024	1	BP
GO:0006144	purine nucleobase metabolic process	1	0.00419024	1	BP
GO:0006334	nucleosome assembly	1	0.0052481	1	BP
GO:0008233	peptidase activity	1	0.00628683	1	MF
GO:0006333	chromatin assembly or disassembly	1	0.0068154	1	BP
GO:0006260	DNA replication	1	0.00893541	1	BP
GO:0005581	collagen trimer	1	0.0101965	1	CC
GO:0006508	proteolysis	1	0.0112381	1	BP
GO:0004044	amidophosphoribosyltransferase activity	1	0.0156665	1	MF
GO:0004126	cytidine deaminase activity	1	0.0156665	1	MF
GO:0004639	phosphoribosylaminoimidazolesuccinocarboxamide synthase activity	1	0.0156665	1	MF
GO:0008892	guanine deaminase activity	1	0.0156665	1	MF
GO:0005215	transporter activity	1	0.0157888	1	MF
GO:0000915	actomyosin contractile ring assembly	1	0.0171482	1	BP
GO:0006147	guanine catabolic process	1	0.0171482	1	BP
GO:0009164	nucleoside catabolic process	1	0.0171482	1	BP
GO:0009972	cytidine deamination	1	0.0171482	1	BP
GO:0019464	glycine decarboxylation via glycine cleavage system	1	0.0171482	1	BP
GO:0030866	cortical actin cytoskeleton organization	1	0.0171482	1	BP
GO:0032506	cytokinetic process	1	0.0171482	1	BP
GO:0032981	mitochondrial respiratory chain complex I assembly	1	0.0171482	1	BP
GO:0034080	CENP-A containing nucleosome assembly	1	0.0171482	1	BP
GO:0046087	cytidine metabolic process	1	0.0171482	1	BP
GO:0046113	nucleobase catabolic process	1	0.0171482	1	BP
GO:0046133	pyrimidine ribonucleoside catabolic process	1	0.0171482	1	BP
GO:0072523	purine-containing compound catabolic process	1	0.0171482	1	BP
GO:0072529	pyrimidine-containing compound catabolic process	1	0.0171482	1	BP
GO:0007049	cell cycle	1	0.0190353	1	BP
GO:0008234	cysteine-type peptidase activity	1	0.0195842	1	MF
GO:0005960	glycine cleavage complex	1	0.0199442	1	CC
GO:0006091	generation of precursor metabolites and energy	1	0.0225568	1	BP
GO:0006213	pyrimidine nucleoside metabolic process	1	0.0265107	1	BP
GO:0004175	endopeptidase activity	1	0.0302737	1	MF
GO:0004332	fructose-bisphosphate aldolase activity	1	0.0310886	1	MF
GO:0004415	hyalurononglucosaminidase activity	1	0.0310886	1	MF
GO:0010997	anaphase-promoting complex binding	1	0.0310886	1	MF
GO:0097027	ubiquitin-protein transferase activator activity	1	0.0310886	1	MF
GO:0090407	organophosphate biosynthetic process	1	0.0320536	1	BP
GO:0008324	cation transmembrane transporter activity	1	0.0323121	1	MF
GO:0044282	small molecule catabolic process	1	0.0328069	1	BP
GO:0006996	organelle organization	1	0.033425	1	BP
GO:0051301	cell division	1	0.0335806	1	BP
GO:0006884	cell volume homeostasis	1	0.0340041	1	BP
GO:0030317	flagellated sperm motility	1	0.0340041	1	BP
GO:0031398	positive regulation of protein ubiquitination	1	0.0340041	1	BP
GO:0036158	outer dynein arm assembly	1	0.0340041	1	BP
GO:0051438	regulation of ubiquitin-protein transferase activity	1	0.0340041	1	BP
GO:1902298	cell cycle DNA replication maintenance of fidelity	1	0.0340041	1	BP
GO:1903320	regulation of protein modification by small protein conjugation or removal	1	0.0340041	1	BP
GO:1904668	positive regulation of ubiquitin protein ligase activity	1	0.0340041	1	BP
GO:1990426	mitotic recombination-dependent replication fork processing	1	0.0340041	1	BP
GO:1901565	organonitrogen compound catabolic process	1	0.03582	1	BP
GO:0003824	catalytic activity	1	0.0372044	1	MF
GO:0014070	response to organic cyclic compound	1	0.0379978	1	BP
GO:0022834	ligand-gated channel activity	1	0.038244	1	MF
GO:0000502	proteasome complex	1	0.039238	1	CC
GO:0098655	cation transmembrane transport	1	0.0392387	1	BP
GO:0008540	proteasome regulatory particle, base subcomplex	1	0.0394944	1	CC
GO:0031932	TORC2 complex	1	0.0394944	1	CC
GO:0034709	methylosome	1	0.0394944	1	CC
GO:0034715	pICln-Sm protein complex	1	0.0394944	1	CC
GO:0036157	outer dynein arm	1	0.0394944	1	CC
GO:0009605	response to external stimulus	1	0.0415748	1	BP
GO:0009124	nucleoside monophosphate biosynthetic process	1	0.0447278	1	BP
GO:0003978	UDP-glucose 4-epimerase activity	1	0.04627	1	MF
GO:0004064	arylesterase activity	1	0.04627	1	MF
GO:0016813	hydrolase activity, acting on carbon-nitrogen (but not peptide) bonds, in linear amidines	1	0.04627	1	MF
GO:0044427	chromosomal part	1	0.0468336	1	CC
GO:0022904	respiratory electron transport chain	1	0.0496004	1	BP
GO:0051640	organelle localization	1	0.0496004	1	BP
GO:0004129	cytochrome-c oxidase activity	1	0.0498328	1	MF
GO:0016675	oxidoreductase activity, acting on a heme group of donors	1	0.0498328	1	MF

## Sheet: allLunar
frame.go_id	Term	Pvalue_Mat	Pvalue_Sex	Pvalue_Lun	ontology
GO:0043248	proteasome assembly	1	1	0.00580731	BP
GO:0005158	insulin receptor binding	1	1	0.0071485	MF
GO:1901293	nucleoside phosphate biosynthetic process	1	1	0.0126204	BP
GO:0005921	gap junction	1	1	0.0134972	CC
GO:0030054	cell junction	1	1	0.0198014	CC
GO:0004803	transposase activity	1	1	0.0213052	MF
GO:0006313	transposition, DNA-mediated	1	1	0.0230526	BP
GO:0006468	protein phosphorylation	1	1	0.0345311	BP
GO:0019637	organophosphate metabolic process	1	1	0.0350577	BP
GO:0004672	protein kinase activity	1	1	0.0371716	MF
