# Supplementary material for: Combined transcriptome and proteome profiling reveals specific molecular brain signatures for sex, maturation and circalunar clock phase
Source: eLife. 2019 Feb 15;8:e41556. doi: 10.7554/eLife.41556 (PMC6377233; doi:10.7554/eLife.41556)
Supplement: Figure 3—source data 13. — This file contains the IDs, mean expression values, top hit by blastX with e-value cut-off 10-4, e-value corresponding to blast hit, number of identical/ similar AA or gaps in blast alignment ("identity", "positives", "gaps") for all transcripts significantly regulated during maturation. [file elife-41556-fig3-data13.xlsx]

## Sheet: 20181210_allMaturation_meanExpr
compID	IM_NM_mean	PM_NM_F_mean	PM_NM_M_mean	M_NM_F_mean	M_NM_M_mean	IM_FRFM_mean	PM_FRFM_F_mean	PM_FRFM_M_mean	Top.hit.ID	E.value	Identity....	Positives....	Gaps....
ash1	35.1731	40.3448	38.8728	1.66983	6.08392	46.5866	18.0353	35.971	emb|CAQ57532.1| achaete-scute-related gene 1 product [Platynereis dumerilii]	2e-75	100	100	0
comp1173772_c0_seq1	27.2849	11.5934	15.3781	33.4607	44.4593	19.267	16.3908	24.172	NA	NA	NA	NA	NA
comp1174362_c0_seq1	16.0734	21.6624	15.5196	288.527	264.745	15.6789	26.0803	26.2692	emb|CAJ38793.1| dopa decarboxylase protein [Platynereis dumerilii]	2e-46	77	87	0
comp1176849_c0_seq1	4.18042	10.2482	14.1594	0	1.62748	5.63418	8.33738	14.0362	NA	NA	NA	NA	NA
comp1177027_c0_seq1	22.7943	82.808	38.9917	62.8449	57.9362	32.9663	50.6347	38.9065	gb|KKW06795.1| hypothetical protein UY39_C0025G0005 [Candidatus Kaiserbacteria bacterium GW2011_GWC2_49_12]	5e-12	35	52	3
comp1177571_c0_seq1	56.6532	65.2737	50.8719	25.5617	22.3657	43.5849	60.6743	43.0464	NA	NA	NA	NA	NA
comp1178039_c0_seq1	8.50923	5.41452	4.66017	31.4349	18.3154	5.09838	6.88695	6.80208	NA	NA	NA	NA	NA
comp1185751_c0_seq1	4.53628	1.49176	1.2186	0	0	2.62739	2.6083	3.09563	dbj|BAN64234.1| cAMP-specific phosphodiesterase, putative [Babesia bovis]	3e-09	41	57	3
comp1186209_c0_seq1	5.70575	14.0425	11.7293	0	0.42618	7.92206	7.33284	8.8249	NA	NA	NA	NA	NA
comp1187047_c0_seq1	4.94482	5.59531	2.55511	12.4282	26.6977	2.67823	7.27487	6.98813	ref|XP_013411986.1| PREDICTED: uncharacterized protein LOC106174839 [Lingula anatina] ref|XP_013411987.1| PREDICTED: uncharacterized protein LOC106174839 [Lingula anatina] ref|XP_013411988.1| PREDICTE	7e-19	39	64	3
comp1188866_c0_seq1	7.25304	7.74343	10.4719	26.9737	25.0703	13.14	8.83813	9.90066	ref|XP_013787351.1| PREDICTED: atrial natriuretic peptide receptor 1-like, partial [Limulus polyphemus]	2e-69	55	71	1
comp1192611_c0_seq1	90.9575	78.956	63.7464	1329.49	1450.67	84.9685	111.672	77.8938	NA	NA	NA	NA	NA
comp1192934_c0_seq1	76.7214	48.1489	84.2904	850.919	478.297	129.871	63.2047	58.8307	NA	NA	NA	NA	NA
comp1193006_c0_seq1	3.25192	0.443957	0.71344	511.277	125.775	0.286337	0.825045	1.25426	NA	NA	NA	NA	NA
comp1193122_c0_seq1	27.472	19.3297	17.9345	1.25237	4.1141	21.3962	14.3762	10.4552	NA	NA	NA	NA	NA
comp1193693_c0_seq1	27.6704	27.4956	23.5245	43.1617	82.5496	27.0993	23.5529	25.6389	NA	NA	NA	NA	NA
comp1193769_c0_seq1	412.75	966.49	888.785	45.597	46.2275	481.159	717.916	644.164	NA	NA	NA	NA	NA
comp1193815_c0_seq1	3.06124	3.71924	5.9224	87.9799	75.1364	1.68444	3.8676	5.98742	NA	NA	NA	NA	NA
comp1193891_c0_seq1	205.963	198.732	134.993	1160.39	1104.75	203.849	240.081	198.575	NA	NA	NA	NA	NA
comp1193915_c0_seq1	19.612	8.7725	9.71354	50.8001	41.3524	12.2695	9.11905	12.4224	ref|XP_002047512.1| uncharacterized protein Dvir_GJ11895, isoform A [Drosophila virilis] gb|EDW69854.1| uncharacterized protein Dvir_GJ11895, isoform A [Drosophila virilis]	3e-18	33	51	11
comp1193922_c0_seq1_contamination	6.24748	0.56141	0.332145	14.4814	1.45301	2.21696	0.321343	0	ref|NP_611693.1| ribosomal protein S24 [Drosophila melanogaster] ref|XP_001974499.1| uncharacterized protein Dere_GG21778 [Drosophila erecta] ref|XP_002039932.1| GM15629 [Drosophila sechellia] ref|XP_	3e-65	100	100	0
comp1193932_c0_seq1	17.6412	32.1682	38.0579	108.408	143.925	17.4808	25.8949	23.8091	gb|ELT89412.1| hypothetical protein CAPTEDRAFT_5100 [Capitella teleta]	7e-41	75	93	0
comp1193984_c0_seq1	53.0003	37.8026	41.6305	23.5045	12.49	53.7957	50.803	45.4159	NA	NA	NA	NA	NA
comp1194044_c0_seq1	307.466	137.919	188.131	46.9488	32.6976	142.028	109.567	154.44	NA	NA	NA	NA	NA
comp1194078_c0_seq1	113.027	45.9088	43.4847	52.6009	86.4993	132.8	49.5466	24.5655	NA	NA	NA	NA	NA
comp1194082_c0_seq1	524.138	490.231	489.574	185.504	113.282	558.835	409.174	383.013	NA	NA	NA	NA	NA
comp1194083_c0_seq1	190.664	117.768	97.3343	657.448	353.423	192.091	152.263	140.491	gb|ELT88985.1| hypothetical protein CAPTEDRAFT_219935 [Capitella teleta]	4e-32	37	54	2
comp1194190_c0_seq1	246.505	286.271	230.415	57.8354	92.2248	271.528	267.574	241.76	ref|XP_013414471.1| PREDICTED: protein AATF-like [Lingula anatina]	2e-88	52	69	4
comp1194202_c0_seq1	426.731	348.673	461.08	57.3132	43.2246	538.182	631.555	391.912	NA	NA	NA	NA	NA
comp1194215_c0_seq1	204.939	218.102	169.175	84.9609	59.3658	228.867	244.719	202.63	ref|XP_013403336.1| PREDICTED: WD repeat-containing protein 18-like [Lingula anatina]	1e-140	47	66	6
comp1194244_c0_seq1	1678.07	920.554	757.815	218.635	548.32	819.903	738.054	1149.2	NA	NA	NA	NA	NA
comp1194246_c0_seq1	479.856	1092.14	1119.81	450.801	352.575	399.705	729.895	636.445	ref|XP_006027061.1| PREDICTED: interferon alpha-inducible protein 27-like protein 2B [Alligator sinensis]	1e-06	49	62	8
comp1194248_c0_seq1	1011.67	656.427	501.6	3055.23	2878.17	1098.76	778.041	658.728	NA	NA	NA	NA	NA
comp1194256_c0_seq1	32.3237	23.6141	35.3592	70.5462	66.0866	52.6908	34.1742	42.3378	gb|ELU10130.1| hypothetical protein CAPTEDRAFT_187295 [Capitella teleta]	6e-64	44	59	3
comp1194290_c0_seq1	1876.47	871.252	1691.11	38.5369	316.333	1007.5	552.305	1187.21	NA	NA	NA	NA	NA
comp1194293_c0_seq1	20.0374	31.6191	37.7695	4.11045	2.47984	39.3722	17.6243	26.9643	NA	NA	NA	NA	NA
comp1194304_c0_seq2	152.117	158.008	174.278	32.1088	16.5403	26.6722	161.545	104.222	NA	NA	NA	NA	NA
comp1194329_c0_seq1	2468.91	2014.82	2297.37	860.979	673.476	2537.02	1945.29	1561.65	ref|XP_013063681.1| PREDICTED: aquaporin-8-like isoform X1 [Biomphalaria glabrata]	1e-70	52	66	4
comp1194331_c0_seq1	220.23	253.46	222.2	110.884	113.735	227.086	212.524	224.045	ref|XP_009022266.1| hypothetical protein HELRODRAFT_84263 [Helobdella robusta] gb|ESN99519.1| hypothetical protein HELRODRAFT_84263 [Helobdella robusta]	9e-82	53	71	2
comp1194334_c0_seq1	785.238	2032.94	1689.83	1553.94	1091.23	1416.38	1702.87	1448.34	NA	NA	NA	NA	NA
comp1194343_c0_seq1	3342.43	4314.55	4184.34	1930.85	2071.15	3722.72	3930.99	3835.31	ref|XP_003745114.1| PREDICTED: GTP-binding protein CG1354-like [Metaseiulus occidentalis]	0	76	85	0
comp1194364_c0_seq1	2787.96	800.393	1591.18	1564.93	625.996	2739.53	1501.6	2237.5	NA	NA	NA	NA	NA
comp1194375_c0_seq1	155.279	150.537	153.073	48.4263	70.537	198.534	158.957	143.918	ref|XP_007903254.1| PREDICTED: small integral membrane protein 8 [Callorhinchus milii] ref|XP_007903255.1| PREDICTED: small integral membrane protein 8 [Callorhinchus milii]	5e-20	59	80	1
comp1194390_c0_seq1	227.795	382.175	457.856	113.32	57.352	202.209	400.027	377.689	NA	NA	NA	NA	NA
comp1194395_c0_seq2	91.8091	127.665	143.381	61.5546	48.1468	103.775	139.894	153.284	ref|XP_003728901.1| PREDICTED: 4-hydroxy-2-oxoglutarate aldolase, mitochondrial isoform X2 [Strongylocentrotus purpuratus] ref|XP_785116.4| PREDICTED: 4-hydroxy-2-oxoglutarate aldolase, mitochondrial	6e-117	60	75	1
comp1194397_c0_seq1	232.09	207.457	243.447	554.737	589.211	300.463	200.452	176.963	ref|XP_013383603.1| PREDICTED: serine/threonine-protein kinase 33-like [Lingula anatina] ref|XP_013383604.1| PREDICTED: serine/threonine-protein kinase 33-like [Lingula anatina]	1e-134	62	79	2
comp1194411_c0_seq1	185.91	447.473	410.501	36.0609	42.0163	217.331	445.999	429.386	NA	NA	NA	NA	NA
comp1194471_c0_seq1	2987.79	2095.3	1908.47	5460.57	5221.31	2828.04	2728.45	2289.49	ref|XP_013380503.1| PREDICTED: transmembrane protein 233-like [Lingula anatina]	1e-08	52	74	0
comp1194515_c0_seq1	16.998	30.3208	27.4479	30.7963	38.6907	33.3382	32.4172	22.6655	NA	NA	NA	NA	NA
comp1194519_c0_seq1	554.231	392.541	363.197	850.923	1080.55	647.684	452.692	453.899	NA	NA	NA	NA	NA
comp1194537_c0_seq1	712.527	1206.63	961.274	696.613	448.555	863.745	1461.94	1427.95	NA	NA	NA	NA	NA
comp1194592_c0_seq1	21.2628	20.8331	21.6848	6.00536	5.39265	18.6664	21.7175	21.9651	ref|XP_015246358.1| PREDICTED: zinc finger protein 239-like [Cyprinodon variegatus]	1e-21	34	51	3
comp1194608_c0_seq1	217.91	360.583	360.428	4562.24	2196.39	304.647	428.753	315.706	gb|EKC37175.1| Kielin/chordin-like protein [Crassostrea gigas]	9e-67	30	44	12
comp1194639_c0_seq1	3202.57	4443.87	3815.14	5113.25	5717.81	3439.17	4246.49	3597.59	ref|XP_013782440.1| PREDICTED: CD63 antigen-like [Limulus polyphemus]	1e-31	52	68	5
comp1194937_c0_seq2	269.389	312.394	289.062	531.673	779.635	189.412	333.672	162.654	NA	NA	NA	NA	NA
comp1195006_c0_seq1	273.099	408.704	412.506	254.594	529.317	98.1811	446.992	451.402	NA	NA	NA	NA	NA
comp1195281_c0_seq2	17.6458	60.7588	29.9763	45.5983	52.3318	55.897	38.3605	25.0844	NA	NA	NA	NA	NA
comp1195389_c0_seq1	30.2839	15.8236	15.7538	3.91807	7.20138	5.30185	11.3684	35.0948	gb|ABV22336.1| calmodulin [Noctiluca scintillans]	4e-81	90	97	0
comp1195529_c0_seq1	11.8977	29.147	19.1019	230.402	199.024	28.0086	29.2558	28.2792	NA	NA	NA	NA	NA
comp1195550_c0_seq2	5.2814	1.49452	4.46159	40.4632	85.4057	4.94682	1.85566	3.42031	NA	NA	NA	NA	NA
comp1195672_c0_seq1	11.1932	15.4106	23.1264	0	3.51346	14.2129	9.05238	12.6246	NA	NA	NA	NA	NA
comp1196568_c0_seq1	55.4977	40.7043	34.0278	15.5741	24.923	22.1983	32.7356	44.8953	NA	NA	NA	NA	NA
comp1196706_c0_seq1	4019.12	2700.81	2911.61	1436.25	1192.23	3841.82	2046.03	2372.78	ref|XP_003403261.1| PREDICTED: histone H2A.V [Bombus terrestris] ref|XP_001605065.2| PREDICTED: histone H2A.V [Nasonia vitripennis] ref|XP_003484532.1| PREDICTED: histone H2A.V [Bombus impatiens] ref|	2e-60	98	98	0
comp1198086_c0_seq1	66.8781	158.042	170.349	681.767	309.117	81.7032	179.322	253.422	gb|AGO20698.1| argininosuccinate synthetase [Protopterus annectens]	0	71	86	0
comp1198575_c0_seq1	455.827	389.073	412.374	921.696	854.966	494.397	365.41	456.123	ref|XP_007894964.1| PREDICTED: inositol monophosphatase 1 [Callorhinchus milii] ref|XP_007894965.1| PREDICTED: inositol monophosphatase 1 [Callorhinchus milii] ref|XP_007894967.1| PREDICTED: inositol	8e-97	54	76	0
comp1198911_c0_seq1	827.198	841.487	826.027	1211.85	1161.2	851.668	819.138	787.046	ref|XP_013393426.1| PREDICTED: dnaJ homolog subfamily C member 7-like [Lingula anatina]	5e-177	66	83	0
comp1199108_c0_seq1	75.9694	101.362	91.2989	46.7211	40	111.639	68.8815	78.8837	gb|AEI70679.1| microsomal GST 1 [Perinereis nuntia]	1e-40	53	74	1
comp1200167_c0_seq1	580.301	542.942	463.356	314.063	181.459	656.452	436.33	472.202	ref|XP_013403594.1| PREDICTED: probable small nuclear ribonucleoprotein G [Lingula anatina]	2e-37	83	96	0
comp1200415_c0_seq1	2.88815	0.778158	1.53311	0	0	1.3137	0.275015	2.04817	NA	NA	NA	NA	NA
comp1200743_c0_seq1_contamination	201.837	357.179	363.268	206.409	183.314	317.869	445.158	365.055	ref|XP_002031106.1| GM24208 [Drosophila sechellia] gb|EDW42092.1| GM24208 [Drosophila sechellia]	1e-127	99	100	0
comp1201878_c0_seq1	305.884	728.123	629.145	106.801	120.646	337.401	595.383	671.953	NA	NA	NA	NA	NA
comp1207973_c0_seq1	636.919	732.239	391.897	129.22	224.719	527.744	812.71	517.8	ref|XP_013418114.1| PREDICTED: uncharacterized protein LOC106179130 [Lingula anatina]	5e-06	27	38	8
comp1267867_c0_seq1	156.002	211.245	244.635	11.6888	3.75838	116.279	232.893	253.188	NA	NA	NA	NA	NA
comp1269972_c0_seq1	10.4292	22.6226	18.7996	2.50474	3.08049	9.07304	23.5154	9.01851	NA	NA	NA	NA	NA
comp1271728_c0_seq1	122.177	384.642	393.906	100.79	64.9666	266.201	434.058	228.419	NA	NA	NA	NA	NA
comp1281007_c0_seq1	473.511	374.395	356.325	209.135	198.024	435.092	394.264	426.695	ref|XP_014776732.1| PREDICTED: MRG/MORF4L-binding protein-like [Octopus bimaculoides] gb|KOF82408.1| hypothetical protein OCBIM_22025335mg [Octopus bimaculoides]	6e-39	66	77	1
comp1281272_c0_seq1	1661.08	731.112	1332.44	64.1614	307.768	775.654	643.248	1159.65	NA	NA	NA	NA	NA
comp1288261_c0_seq1	152.194	171.574	150.782	85.3496	90.7516	145.338	159.148	177.395	ref|XP_005093720.1| PREDICTED: uncharacterized protein LOC101849443 [Aplysia californica]	1e-11	29	45	12
comp1291245_c0_seq1	43.8494	165.061	131.245	3.27553	8.80209	55.4254	98.5889	100.154	NA	NA	NA	NA	NA
comp1294500_c0_seq1	3139.18	4019.28	3680.46	5689.61	4488.41	3705.49	4029.1	3872.01	gb|ELU04712.1| hypothetical protein CAPTEDRAFT_155110 [Capitella teleta]	4e-78	87	94	1
comp1296583_c0_seq1	30.0148	28.8659	23.3892	0	0	36.7874	72.0922	25.1157	NA	NA	NA	NA	NA
comp1297130_c0_seq1	1484.88	1348.8	1089.48	417.385	532.379	1432.01	1358.52	1216.22	NA	NA	NA	NA	NA
comp1311244_c0_seq1	3.91475	14.6242	12.0244	14.6123	35.0738	5.94671	7.80751	7.64704	NA	NA	NA	NA	NA
comp1315948_c0_seq1	86.7094	296.694	190.432	1631.6	616.945	110.088	398.197	316.414	emb|CAM91763.1| hypothetical protein [Platynereis dumerilii]	3e-79	98	98	0
comp1316571_c0_seq1	905.307	1123.67	1193.41	2687.86	2078.72	816.756	1203.2	979.541	gb|ELT90054.1| hypothetical protein CAPTEDRAFT_225506 [Capitella teleta]	3e-18	32	46	31
comp1317356_c0_seq1	9.17857	18.4197	15.2244	5.52378	34.0402	15.139	9.9614	13.1652	NA	NA	NA	NA	NA
comp1321026_c0_seq1	6.16556	4.58286	4.70336	11.6574	27.7517	9.47455	3.77494	3.6271	NA	NA	NA	NA	NA
comp1323964_c0_seq1	595.101	725.104	715.443	1141.92	822.988	738.058	793.538	658.847	ref|XP_013394469.1| PREDICTED: protein FRG1-like [Lingula anatina] ref|XP_013404349.1| PREDICTED: protein FRG1-like [Lingula anatina]	1e-87	59	77	1
comp1331331_c0_seq1	18.7209	46.3086	42.1921	7.48282	12.5739	18.6242	32.1797	42.7342	NA	NA	NA	NA	NA
comp1337655_c0_seq1	176.728	156.585	156.585	280.28	382.386	185.487	145.73	162.544	NA	NA	NA	NA	NA
comp1339124_c0_seq1	1232.83	2304.39	1959.26	231.574	214.066	1576.26	2680.79	1558.1	NA	NA	NA	NA	NA
comp1341557_c0_seq1	968.288	1088.82	1025.01	557.435	512.474	1207.59	967.952	954.953	ref|XP_014255464.1| PREDICTED: protein preli-like [Cimex lectularius]	2e-54	50	66	3
comp1368210_c0_seq1	48.5447	67.1504	63.0252	528.09	613.914	34.2933	48.316	49.4352	gb|ELU11624.1| hypothetical protein CAPTEDRAFT_125820, partial [Capitella teleta]	0	64	81	6
comp1369760_c0_seq1	1.23345	1.66822	3.47308	22.5426	13.7618	3.49096	3.70254	1.46105	ref|XP_012709508.1| PREDICTED: fibrocystin-L [Fundulus heteroclitus]	1e-55	54	66	2
comp1376985_c0_seq1	4.1216	1.71127	2.08742	41.0063	30.3789	3.03171	1.71667	3.90139	NA	NA	NA	NA	NA
comp1380251_c0_seq1	17.4266	18.6807	20.9364	2.37649	5.82542	22.953	21.098	13.8109	NA	NA	NA	NA	NA
comp1396943_c0_seq1	24.2268	22.2505	18.1296	65.4125	58.9319	30.8364	25.3218	21.5722	NA	NA	NA	NA	NA
comp1408528_c0_seq1	33.5501	4.47156	3.62405	19.1729	13.5236	0.421111	17.1987	30.5301	NA	NA	NA	NA	NA
comp1408619_c0_seq1	27.0919	43.4196	37.4276	1.66983	4.54028	34.3639	19.836	21.1643	NA	NA	NA	NA	NA
comp1425511_c0_seq1	58.1375	73.0447	69.0084	140	211.582	64.8843	78.5964	82.5546	gb|ELT92986.1| hypothetical protein CAPTEDRAFT_18220 [Capitella teleta]	3e-92	50	74	1
comp1442785_c0_seq1	398.444	290.845	228.223	98.266	172.717	406.565	285.558	284.058	NA	NA	NA	NA	NA
comp1443740_c0_seq1	2.57255	12.8496	15.2802	26.1074	30.5266	13.5768	2.77041	5.81916	NA	NA	NA	NA	NA
comp1500489_c0_seq1	46.1442	53.7981	53.6058	31.1797	19.4261	43.8838	63.6478	52.299	NA	NA	NA	NA	NA
comp1506663_c0_seq1	147.488	72.8979	68.3254	29.7376	31.5301	105.128	40.7028	59.8169	gb|EKC28757.1| A disintegrin and metalloproteinase with thrombospondin motifs 13 [Crassostrea gigas]	4e-08	46	63	7
comp1508505_c0_seq1	70.8951	49.2898	40.1311	12.4923	27.7651	51.307	48.5303	54.6049	NA	NA	NA	NA	NA
comp1531284_c0_seq1	621.432	695.793	681.218	2009.49	1808.09	943.553	636.629	716.477	ref|XP_013395153.1| PREDICTED: uncharacterized protein LOC106162403 [Lingula anatina]	2e-86	36	53	3
comp1565422_c0_seq1	3.06915	10.0739	12.4705	16.2821	21.0068	5.92302	8.47923	7.14454	ref|XP_013776171.1| PREDICTED: uncharacterized protein LOC106460925 [Limulus polyphemus]	6e-11	33	52	7
comp1601248_c0_seq1	243.341	175.326	189.834	405.955	384.819	289.966	222.873	154.33	ref|XP_013409610.1| PREDICTED: uncharacterized protein C1orf228 homolog [Lingula anatina]	0	73	87	0
comp1615018_c0_seq1	766.749	536.675	549.046	460.88	180.854	1001.5	694.639	715.543	gb|ELU05212.1| hypothetical protein CAPTEDRAFT_211623 [Capitella teleta]	6e-22	46	60	3
comp1665789_c0_seq1	48.9604	175.474	97.701	6.64658	0.852361	34.6829	103.56	87.3585	NA	NA	NA	NA	NA
comp1692963_c0_seq1	26.6059	74.2309	83.541	42.095	65.6736	7.80233	40.7665	60.579	gb|ELU01464.1| hypothetical protein CAPTEDRAFT_219353 [Capitella teleta]	9e-09	30	54	5
comp1746341_c0_seq1	404.979	409.969	385.555	693.795	602.253	497.832	441.211	377.715	gb|ELU06418.1| hypothetical protein CAPTEDRAFT_155234 [Capitella teleta]	1e-106	68	83	0
comp1769718_c0_seq1	495.382	1727.15	1966.96	120.924	125.943	502.7	1741.78	2207.03	NA	NA	NA	NA	NA
comp1781461_c0_seq1	669.399	919.992	734.692	393.989	216.789	732.696	859.153	706.362	ref|NP_001009489.1| 2 ' -5 ' oligoadenylate synthetase 1K [Rattus norvegicus] gb|AAP41938.1| 2'-5' oligoadenylate synthetase 1K [Rattus norvegicus] gb|AAH88437.1| 2 ' -5 ' oligoadenylate synthetase 1K	1e-10	26	44	18
comp1795720_c0_seq1	417.787	371.367	367.23	675.509	669.771	348.396	378.831	401.336	ref|XP_002734090.1| PREDICTED: calmodulin-like [Saccoglossus kowalevskii]	8e-21	41	63	3
comp1832488_c0_seq1	239.98	296.144	281.443	184.631	137.59	298.783	209.8	275.547	NA	NA	NA	NA	NA
comp1847822_c0_seq1	5.39459	9.99894	10.417	81.4315	57.6237	12.3076	13.9216	5.78492	NA	NA	NA	NA	NA
comp1867164_c0_seq1	104.809	149.154	130.476	57.1641	59.9896	87.0923	145.101	166.975	ref|XP_013405094.1| PREDICTED: histone H2A deubiquitinase MYSM1-like [Lingula anatina]	1e-44	55	65	10
comp1875347_c0_seq1	5.66542	16.7591	11.8496	1.18825	1.70472	14.6881	18.7329	6.66708	NA	NA	NA	NA	NA
comp1876805_c0_seq1	1293.83	1608.09	1566.93	1085.95	811.563	1407.09	1609.14	1510.76	ref|XP_013389686.1| PREDICTED: actin-related protein 2/3 complex subunit 2-like isoform X2 [Lingula anatina] ref|XP_013388344.1| PREDICTED: actin-related protein 2/3 complex subunit 2-like isoform X3	9e-169	79	89	1
comp1879754_c0_seq1	108.941	58.0335	43.0541	18.6887	23.5468	151.382	60.7903	44.4418	NA	NA	NA	NA	NA
comp1879972_c0_seq1	86.2563	127.598	142.011	238.347	427.438	64.8641	111.237	110.109	NA	NA	NA	NA	NA
comp1884986_c0_seq1	96.6977	98.9601	97.9679	58.1194	32.3487	107.952	99.3189	94.9423	ref|XP_013390730.1| PREDICTED: rRNA-processing protein FCF1 homolog [Lingula anatina] ref|XP_013402844.1| PREDICTED: rRNA-processing protein FCF1 homolog [Lingula anatina]	2e-106	80	94	1
comp1885849_c0_seq1	964.33	1088.72	1189.12	2770.55	2452.83	1123.49	938.21	878.742	ref|XP_013415345.1| PREDICTED: uncharacterized protein LOC106177187 [Lingula anatina] ref|XP_013415346.1| PREDICTED: uncharacterized protein LOC106177187 [Lingula anatina] ref|XP_013415347.1| PREDICTE	7e-70	38	58	8
comp1887021_c0_seq1	564.549	359.844	437.801	178.7	216.847	339.389	266.635	397.01	ref|XP_011423802.1| PREDICTED: disks large-associated protein 5-like isoform X1 [Crassostrea gigas]	2e-46	43	60	11
comp1887132_c0_seq1	33.0112	44.2926	62.2254	87.6606	78.9117	40.8808	52.9187	61.1358	NA	NA	NA	NA	NA
comp1888169_c0_seq2	230.353	196.587	163.112	351.449	306.427	236.357	190.576	168.519	ref|NP_001187542.1| ubiquitin-fold modifier 1 [Ictalurus punctatus] gb|ADO28792.1| ubiquitin-fold modifier 1 [Ictalurus punctatus]	3e-47	92	98	0
comp1888429_c0_seq1	1236.24	1623.38	1430.99	2438.96	2161.74	1263.75	1542.79	1376.13	ref|XP_011420699.1| PREDICTED: dymeclin-like [Crassostrea gigas] ref|XP_011420700.1| PREDICTED: dymeclin-like [Crassostrea gigas]	0	65	82	1
comp1890089_c0_seq1	0	0.577397	0.904088	2.44062	3.93964	0.788566	1.56039	1.54929	NA	NA	NA	NA	NA
comp1893218_c0_seq2	159.873	250.754	240.724	740.881	547.915	165.06	212.822	214.669	NA	NA	NA	NA	NA
comp1897429_c0_seq1	373.637	359.794	311.427	1257.27	1076.3	498.995	361.643	316.646	NA	NA	NA	NA	NA
comp1901146_c0_seq1	6.26189	5.2033	4.80762	77.2334	86.248	5.41218	3.54626	5.4003	NA	NA	NA	NA	NA
comp1903071_c0_seq1	25.9166	31.7283	29.1223	10.9494	10.1912	27.6351	27.9214	18.421	NA	NA	NA	NA	NA
comp1903780_c0_seq1	168.685	122.592	84.4249	61.141	53.9457	40.429	134.371	63.3426	NA	NA	NA	NA	NA
comp1904735_c0_seq1	2.90877	5.29922	10.4717	24.8864	24.5601	2.07198	6.73648	6.36315	ref|XP_011439219.1| PREDICTED: solute carrier family 23 member 2-like, partial [Crassostrea gigas]	1e-72	54	76	1
comp1908160_c0_seq1	13.5273	29.4449	33.5816	13.3586	11.547	20.3607	24.8845	27.1125	NA	NA	NA	NA	NA
comp1908346_c0_seq1	7.02112	3.96183	2.07354	116.6	34.9762	2.85396	3.49993	3.17565	emb|CAA73254.1| amino acid transporter chain (AmAt-L-lc) ASUR4 [Xenopus laevis]	2e-32	42	66	1
comp1909730_c0_seq1	115.66	129.048	68.8103	632.038	181.787	222.379	124.619	81.2821	ref|XP_001661750.1| AAEL011566-PA [Aedes aegypti] gb|EAT36338.1| AAEL011566-PA [Aedes aegypti]	2e-07	50	59	9
comp1912727_c0_seq1	15.5203	4.70645	5.43444	77.5161	53.738	12.7079	5.26293	4.48851	ref|XP_006824665.1| PREDICTED: D(2) dopamine receptor-like [Saccoglossus kowalevskii]	9e-18	36	63	3
comp1914219_c0_seq1	9.14658	4.48694	3.44157	33.6844	29.4427	7.55663	4.39738	5.02887	NA	NA	NA	NA	NA
comp1916133_c0_seq1	195.895	342.46	310.835	117.33	78.516	219.979	304.025	358.869	gb|ELT96049.1| hypothetical protein CAPTEDRAFT_223820 [Capitella teleta]	5e-09	34	44	1
comp1916779_c0_seq1	1315.32	1699	1424.7	574.055	647.326	1322.36	1635.65	1338.81	gb|ELU17153.1| hypothetical protein CAPTEDRAFT_119323 [Capitella teleta]	2e-38	54	78	1
comp1917143_c0_seq1	112.633	157.283	156.825	114.469	76.8585	199.406	150.014	130.542	ref|XP_006818618.1| PREDICTED: low molecular weight phosphotyrosine protein phosphatase-like isoform X1 [Saccoglossus kowalevskii]	1e-68	62	74	4
comp1918490_c0_seq1	27.9167	34.4074	24.0471	6.84028	10.624	18.8181	34.0237	29.7501	NA	NA	NA	NA	NA
comp1920273_c0_seq1	68.6885	306.193	313.291	14.1936	3.3322	42.3937	175.117	206.898	NA	NA	NA	NA	NA
comp1922843_c0_seq1	129.291	111.572	86.4383	49.0021	47.5535	107.767	114.088	130.573	gb|ELU12969.1| hypothetical protein CAPTEDRAFT_219797 [Capitella teleta]	2e-24	41	58	3
comp1923942_c0_seq1	10.8862	3.74352	3.99785	21.5782	11.2885	2.29069	2.63438	6.26239	NA	NA	NA	NA	NA
comp1926910_c0_seq1	494.336	472.858	492.545	243.203	178.456	460.973	381.497	424.34	gb|KFM68300.1| Alcohol dehydrogenase [NADP(+)] A, partial [Stegodyphus mimosarum]	4e-91	50	67	3
comp1927232_c0_seq1	2483.51	4455.94	4527.42	2809.48	2120.87	2480.41	4417.03	4208.22	gb|AGX93009.1| vrille, partial [Platynereis dumerilii]	0	100	100	0
comp1927433_c0_seq1	565.87	604.193	566.618	377.65	301.69	666.09	591.453	647.346	gb|KRT78634.1| hypothetical protein AMK59_7949, partial [Oryctes borbonicus]	6e-51	97	98	0
comp1927618_c0_seq1	88.196	94.4324	92.1444	1055	1026.58	119.449	64.6345	61.7983	ref|XP_011450252.1| PREDICTED: fibronectin type 3 and ankyrin repeat domains 1 protein-like isoform X2 [Crassostrea gigas]	3e-136	57	77	3
comp1928107_c0_seq1	181.254	193.828	190.642	81.7561	119.697	189.002	179.473	192.348	ref|XP_013382104.1| PREDICTED: integrator complex subunit 10-like [Lingula anatina]	0	46	67	3
comp1931832_c0_seq1	140.578	166.841	176.238	106.576	103.875	169.497	158.707	167.532	gb|ELU16416.1| hypothetical protein CAPTEDRAFT_227809 [Capitella teleta]	1e-166	55	74	6
comp1933325_c0_seq2	2810.16	1809.95	3487.77	563.184	341.103	2030.1	1896.4	1720.44	NA	NA	NA	NA	NA
comp1934156_c0_seq1	118.833	119.667	92.0671	27.8086	39.7181	109.859	112.589	113.815	ref|XP_011431396.1| PREDICTED: zinc finger CCHC domain-containing protein 9-like [Crassostrea gigas]	2e-59	60	77	1
comp1934900_c0_seq1	14.1427	14.2771	32.2899	3.50062	4.87584	6.79303	11.4291	12.7227	NA	NA	NA	NA	NA
comp1935108_c0_seq1	119.421	353.874	279.654	118.425	95.2841	132.798	359.139	383.785	ref|XP_013389552.1| PREDICTED: cis-3-hydroxy-L-proline dehydratase-like [Lingula anatina]	2e-178	65	78	0
comp1935283_c0_seq1	300.419	333.813	296.214	587.807	519.734	374.162	245.563	248.265	ref|XP_006817614.1| PREDICTED: uncharacterized protein C19orf44 homolog [Saccoglossus kowalevskii]	3e-39	54	77	1
comp1941809_c0_seq1	5.84198	8.1367	6.69623	23.5058	23.0032	10.1148	6.95353	7.62563	NA	NA	NA	NA	NA
comp1942453_c0_seq1	725.849	1145.72	1116.49	372.697	496.762	764.591	903.743	963.623	ref|XP_014785093.1| PREDICTED: MORC family CW-type zinc finger protein 2-like [Octopus bimaculoides] ref|XP_014785094.1| PREDICTED: MORC family CW-type zinc finger protein 2-like [Octopus bimaculoides	0	65	82	1
comp1942624_c0_seq1	0.269134	0.577397	0.190648	21.4212	16.4999	2.09286	0	1.46105	NA	NA	NA	NA	NA
comp1942725_c0_seq1	88.1919	118.507	90.1497	52.0853	44.6908	130.364	143.793	59.348	NA	NA	NA	NA	NA
comp1943186_c0_seq1	238.612	180.948	177.099	19.2671	39.718	215.263	193.265	140.303	NA	NA	NA	NA	NA
comp1945561_c0_seq2	5380.2	10937.7	15317.1	1715.44	1922.85	4102.57	12784.7	15912.3	gb|ELT99852.1| hypothetical protein CAPTEDRAFT_226930 [Capitella teleta]	5e-12	46	63	4
comp1946609_c0_seq2	1847.32	2339.46	2023.85	1281.33	1292.7	1785.28	2283.92	2559.96	gb|ELU11056.1| hypothetical protein CAPTEDRAFT_228466 [Capitella teleta]	0	56	71	4
comp1946667_c0_seq1	7.19209	9.50544	10.0748	33.5261	31.795	10.03	9.2782	7.43068	NA	NA	NA	NA	NA
comp1946949_c0_seq2	37.8937	89.2291	92.6674	15.0284	9.06699	79.3771	68.9451	62.0176	NA	NA	NA	NA	NA
comp1949817_c0_seq2	36.5652	95.513	71.302	2.02316	6.85904	19.5271	70.1645	86.8998	NA	NA	NA	NA	NA
comp1949952_c0_seq1	13.2445	6.56103	4.47745	36.4496	44.4321	14.8728	4.81138	7.02004	NA	NA	NA	NA	NA
comp1950448_c0_seq1	22.3814	20.4403	28.8199	2.02316	8.04695	19.2955	27.5276	28.2482	ref|XP_005089923.2| PREDICTED: heme-binding protein 2-like [Aplysia californica]	3e-55	49	67	2
comp1950593_c0_seq1	241.158	224.059	275.338	141.485	158.852	294.22	263.251	290.94	ref|XP_011451515.1| PREDICTED: uncharacterized protein LOC105345158 isoform X1 [Crassostrea gigas] ref|XP_011451516.1| PREDICTED: uncharacterized protein LOC105345158 isoform X2 [Crassostrea gigas]	8e-13	31	51	13
comp1951303_c0_seq1	453.472	463.149	416.504	216.159	179.688	523.579	404.428	409.903	ref|XP_014783260.1| PREDICTED: U1 small nuclear ribonucleoprotein A-like [Octopus bimaculoides] gb|KOF98270.1| hypothetical protein OCBIM_22026579mg [Octopus bimaculoides]	2e-113	73	79	9
comp1951549_c0_seq1	17.1141	27.6235	29.7766	6.42282	10.7851	29.4858	30.2575	23.7373	ref|XP_011446081.1| PREDICTED: armadillo repeat-containing protein 7-like [Crassostrea gigas]	1e-88	65	83	0
comp1953387_c0_seq1	367.119	482.209	484.663	177.037	234.516	376.706	428.07	501.233	ref|XP_013418240.1| PREDICTED: nibrin-like [Lingula anatina]	2e-106	49	66	3
comp1953601_c0_seq1	4554.94	7507.25	10849.4	1832.88	1206.88	3340.7	7138.37	8446.13	NA	NA	NA	NA	NA
comp1953996_c0_seq1	392.99	451.662	347.635	139.742	160.141	444.863	447.936	408.408	ref|XP_013410920.1| PREDICTED: ribosome biogenesis protein bop1-B-like [Lingula anatina]	0	64	81	0
comp1954733_c0_seq1	33.4197	85.2884	70.1371	44.5697	26.5939	55.5737	80.8749	46.1002	NA	NA	NA	NA	NA
comp1954810_c0_seq2	232.267	328.7	316.55	224.902	151.564	357.266	263.153	223.81	gb|ELU01936.1| hypothetical protein CAPTEDRAFT_176844 [Capitella teleta]	2e-168	67	80	1
comp1956628_c0_seq1	18.0306	20.8187	23.026	181.077	321.984	26.5141	21.3963	24.5226	NA	NA	NA	NA	NA
comp1957922_c0_seq1	270.104	276.369	210.731	136.206	109.087	275.674	312.646	260.056	ref|XP_013412104.1| PREDICTED: probable 18S rRNA (guanine-N(7))-methyltransferase [Lingula anatina]	8e-137	72	85	1
comp1958235_c0_seq1	18.2647	12.2738	14.0199	41.9367	53.0403	11.6411	15.6325	16.5915	NA	NA	NA	NA	NA
comp1958245_c0_seq1	49738.6	35642.1	31650.3	28035.5	24769.9	43718.1	46320.4	39047.7	gb|ACD65133.1| putative 60S ribosomal protein RPLP1 [Novocrania anomala]	9e-23	76	90	0
comp1959397_c0_seq1	6.69274	2.33447	1.37773	81.6344	25.413	2.71589	13.1081	7.87323	NA	NA	NA	NA	NA
comp1960799_c0_seq1	23.2501	10.517	8.99987	28.5494	46.5838	24.6939	10.4941	12.1	NA	NA	NA	NA	NA
comp1962807_c0_seq1	113.457	158.33	156.232	60.6568	43.6778	103.35	182.802	126.321	emb|CAM91777.1| hypothetical protein [Platynereis dumerilii]	4e-65	99	100	0
comp1962821_c0_seq1	248.387	317.208	314.989	131.502	146.647	242.554	389.902	366.533	ref|XP_015211325.1| PREDICTED: histone H2A deubiquitinase MYSM1 isoform X3 [Lepisosteus oculatus]	1e-116	45	59	10
comp1963028_c0_seq1	78.7505	288.638	266.749	70.0686	37.0472	142.583	258.281	194.988	gb|ELT96049.1| hypothetical protein CAPTEDRAFT_223820 [Capitella teleta]	8e-10	36	46	3
comp1964587_c0_seq1	357.259	508.686	508.46	166.822	179.113	345.062	410.721	449.872	NA	NA	NA	NA	NA
comp1968131_c0_seq1	62.373	40.1021	45.2323	13.1021	27.8488	37.933	50.7075	42.8234	NA	NA	NA	NA	NA
comp1968455_c0_seq1	45.8737	79.1727	90.3403	13.1034	22.8693	49.0606	98.1665	49.4655	NA	NA	NA	NA	NA
comp1969782_c0_seq1	9.42885	5.91475	6.21289	19.4922	35.6508	18.9389	5.41356	11.556	NA	NA	NA	NA	NA
comp1970723_c0_seq1	2412.05	2137.87	2361.57	1017.39	1034.22	2524.6	1979.71	2079.05	gb|ACF49124.1| FK506-binding protein-like protein [Echinococcus granulosus] gb|EUB59922.1| Peptidyl-prolyl cis-trans isomerase FKBP1A [Echinococcus granulosus]	6e-50	77	88	0
comp1971890_c0_seq1	70.498	81.4563	130.629	17.6915	10.5202	62.2696	87.7535	97.8391	NA	NA	NA	NA	NA
comp1971911_c0_seq1	614.547	923.946	1008.16	601.12	559.974	769.847	889.208	879.881	gb|ELT87616.1| hypothetical protein CAPTEDRAFT_179888 [Capitella teleta]	0	78	88	1
comp1973581_c0_seq1	1009.11	1052.69	1096.52	2442.02	1873.65	1256.08	1110.58	927.555	ref|XP_011420776.1| PREDICTED: calpain-9-like [Crassostrea gigas]	1e-134	37	56	8
comp1974124_c0_seq1	43.2288	127.2	87.453	6.23044	4.87584	55.355	132.643	146.74	NA	NA	NA	NA	NA
comp1975390_c0_seq1	145.083	421.452	396.069	45.0827	21.1306	167.462	337.038	364.235	ref|XP_006811432.1| PREDICTED: uncharacterized protein LOC102800450, partial [Saccoglossus kowalevskii]	4e-05	25	40	2
comp1975994_c0_seq1	463.582	666.274	642.626	2218.27	1714.87	480.46	728.622	645.345	ref|XP_013407716.1| PREDICTED: autophagy-related protein 9A-like [Lingula anatina]	0	58	73	6
comp1976618_c0_seq1	773.826	989.26	970.732	2091.85	2413.34	1158.63	784.089	912.404	gb|ELU17525.1| hypothetical protein CAPTEDRAFT_189596 [Capitella teleta]	6e-63	32	52	11
comp1977957_c0_seq1	18941	13925	13569.8	10197.4	6817.01	17380.3	16228.5	14611.3	gb|EDL17115.1| ribosomal protein S15a, isoform CRA_b [Mus musculus]	4e-83	85	92	0
comp1981028_c0_seq1	60.6472	172.473	111.109	163.219	13.349	40.7476	183.234	111.765	ref|XP_014455610.1| PREDICTED: hyaluronidase-3 isoform X3 [Alligator mississippiensis]	7e-56	30	50	10
comp1981288_c0_seq1	305.919	416.865	418.231	107.865	115.171	321.445	380.035	452.871	gb|EKC19071.1| RING finger protein 17 [Crassostrea gigas]	2e-175	34	52	5
comp1982469_c0_seq1	31.9823	119.651	104.55	15.6697	21.4023	33.5082	75.8989	80.9542	NA	NA	NA	NA	NA
comp1983510_c0_seq1	1542.57	1382.31	1098.86	523.11	559.071	1319.63	1482.97	1041.13	NA	NA	NA	NA	NA
comp1983525_c0_seq1	260.982	172.139	159.329	334.63	324.757	254.913	193.03	169.441	ref|XP_010212992.1| PREDICTED: dynein light chain roadblock-type 2 [Tinamus guttatus]	1e-35	56	77	1
comp1984251_c0_seq1	2369.84	2202.08	2082.46	1734.02	1257.24	2857.1	2535.87	2091.25	ref|XP_013405028.1| PREDICTED: eukaryotic translation initiation factor 3 subunit H-like [Lingula anatina]	3e-143	73	85	0
comp1984283_c0_seq1	5.6799	12.6753	15.9866	0.417457	1.45301	3.33202	13.305	20.5936	NA	NA	NA	NA	NA
comp1984701_c0_seq1	1855.33	1839.33	1927.92	574.08	542.247	2108.61	2015.17	2071.89	gb|ELT94218.1| hypothetical protein CAPTEDRAFT_214161 [Capitella teleta]	1e-37	31	51	4
comp1985114_c0_seq1	443.515	419.71	364.746	125.455	175.621	495.519	418.318	396.672	ref|XP_013380332.1| PREDICTED: probable rRNA-processing protein EBP2 isoform X1 [Lingula anatina]	2e-91	58	71	4
comp1985261_c1_seq1	161.549	376.824	403.402	75.1369	99.3912	223.465	372.129	434.707	ref|XP_002592001.1| hypothetical protein BRAFLDRAFT_79590 [Branchiostoma floridae] gb|EEN48012.1| hypothetical protein BRAFLDRAFT_79590 [Branchiostoma floridae]	5e-05	28	49	13
comp1988155_c0_seq1	1945.8	3031.49	2630.32	949.805	810.774	1274.36	2690.09	1737.34	ref|XP_013391495.1| PREDICTED: uncharacterized protein LOC106159679 isoform X1 [Lingula anatina] ref|XP_013391496.1| PREDICTED: uncharacterized protein LOC106159679 isoform X1 [Lingula anatina] ref|XP	8e-11	23	43	12
comp1988211_c0_seq1	15.2343	21.9166	21.5116	6.77483	5.56711	18.7648	17.9542	22.2822	NA	NA	NA	NA	NA
comp1988763_c0_seq1	3354.29	3645.93	3572.08	2274.48	1473.53	4692.25	4230.45	3564.48	ref|XP_013397394.1| PREDICTED: eukaryotic translation initiation factor 3 subunit F-like [Lingula anatina]	4e-148	72	88	0
comp1988914_c0_seq1	25.1047	15.1589	16.6967	2.9222	3.8556	10.5355	19.118	14.6872	ref|XP_013384737.1| PREDICTED: uncharacterized protein LOC106154794 isoform X3 [Lingula anatina]	3e-27	50	71	0
comp1989968_c0_seq1	16.094	8.62525	9.65425	24.6313	26.0067	6.69714	11.2149	12.1942	gb|EKC34876.1| hypothetical protein CGI_10027585 [Crassostrea gigas]	4e-06	40	72	1
comp1991283_c0_seq1	166.866	157.112	147.046	63.6732	81.0773	215.08	187.987	154.686	ref|XP_011453742.1| PREDICTED: RNA 3'-terminal phosphate cyclase-like protein [Crassostrea gigas]	0	70	84	1
comp1996652_c0_seq1	2.76322	0.671165	1.01032	0	0	0.421111	0	0.607861	ref|WP_000661355.1| hypothetical protein [Streptococcus agalactiae] gb|EPT38157.1| hypothetical protein SAG0024_03520 [Streptococcus agalactiae FSL C1-494] gb|EPT49829.1| hypothetical protein SAG0034_	3e-06	32	57	3
comp2007702_c0_seq1	8.64376	0.935874	3.76203	16.4405	29.9932	8.97768	2.13067	2.00964	NA	NA	NA	NA	NA
comp2010559_c0_seq1	497.005	419.794	457.411	906.331	1150.7	520.829	368.336	349.451	ref|XP_013410088.1| PREDICTED: enkurin-like [Lingula anatina] ref|XP_013392035.1| PREDICTED: enkurin-like [Lingula anatina]	6e-90	58	72	3
comp2016072_c0_seq1	213.354	201.535	111.544	18.6573	94.3023	88.7992	124.646	153.405	NA	NA	NA	NA	NA
comp2016467_c0_seq1	8.57152	7.45938	8.47707	0.834915	1.27854	15.9182	7.68592	8.8924	NA	NA	NA	NA	NA
comp2017894_c0_seq1	7.388	5.24141	1.8593	28.5127	10.2046	7.45091	4.59999	9.68631	ref|WP_027325412.1| hypothetical protein [Bacteroides pyogenes]	5e-103	75	85	1
comp2020617_c0_seq1	67.0691	70.7812	54.2561	24.4035	12.7549	86.0912	50.2353	49.475	NA	NA	NA	NA	NA
comp2022008_c0_seq1	142.388	85.4596	79.6945	53.5981	30.2818	81.8865	74.9978	127.512	NA	NA	NA	NA	NA
comp2027371_c0_seq1	2740.43	4636.51	4399.83	1590.26	1540.56	3328.16	3925.35	3579.19	NA	NA	NA	NA	NA
comp2027901_c0_seq3	1.54248	0.122979	0.756636	7.54694	6.23822	0.555886	0	1.7146	NA	NA	NA	NA	NA
comp2028238_c0_seq1	225.014	203.183	166.568	81.7521	63.141	231.526	194.22	174.015	ref|XP_002734007.1| PREDICTED: U6 snRNA-associated Sm-like protein LSm1-like [Saccoglossus kowalevskii]	8e-62	78	90	0
comp2034347_c0_seq1	2.24904	14.6045	23.3447	228.213	40.1243	32.621	52.237	1.84138	NA	NA	NA	NA	NA
comp2037149_c0_seq1	396.811	1926.78	1502.76	70.1602	94.3739	455.361	1852.07	2094.5	gb|ELT97538.1| hypothetical protein CAPTEDRAFT_176086 [Capitella teleta]	3e-23	33	48	6
comp2039141_c0_seq1	30.5662	20.2035	25.5785	2.79395	8.40268	46.5117	33.2394	28.3246	ref|XP_009059734.1| hypothetical protein LOTGIDRAFT_124873 [Lottia gigantea] gb|ESO89683.1| hypothetical protein LOTGIDRAFT_124873 [Lottia gigantea]	1e-23	42	61	1
comp2042029_c0_seq1	297.644	265.808	329.954	1397.79	6621.59	272.399	223.229	264.106	gb|AFQ35984.1| glutathione S-transferase sigma 2 [Mytilus galloprovincialis]	6e-55	48	64	3
comp2046374_c0_seq1	26.4111	40.447	33.5622	100.58	110.258	28.4432	32.4578	21.4356	NA	NA	NA	NA	NA
comp2049785_c0_seq1	23.5755	52.5637	45.0273	2.02316	9.50656	13.3179	36.6091	24.8951	NA	NA	NA	NA	NA
comp2052996_c0_seq1	13.3969	3.41149	6.36806	24.1811	59.2381	8.46477	3.82127	2.94284	NA	NA	NA	NA	NA
comp2054903_c0_seq1	18.7429	30.8813	26.5039	1.95904	9.08057	29.8287	28.9782	14.7316	NA	NA	NA	NA	NA
comp2055425_c0_seq1	150.345	159.643	166.158	94.6318	60.54	157.954	152.317	152.632	ref|XP_013405040.1| PREDICTED: PITH domain-containing protein 1-like [Lingula anatina]	7e-102	71	85	0
comp2060830_c0_seq2	13.6715	24.5387	21.808	0.77079	0	6.48863	16.1797	17.5204	NA	NA	NA	NA	NA
comp2061612_c0_seq1	66.4953	77.7001	80.4532	162.162	128.14	98.4713	89.2385	73.6407	emb|CEL94748.1| unnamed protein product [Vitrella brassicaformis CCMP3155]	1e-27	88	93	0
comp2062631_c0_seq1	36.315	86.9995	53.2716	3.50062	14.3892	23.6091	50.4063	28.1923	NA	NA	NA	NA	NA
comp2063065_c0_seq1	58.1916	67.9765	90.3658	8.73387	14.8152	44.8302	58.8827	92.8605	NA	NA	NA	NA	NA
comp2065624_c0_seq3	236.216	1522.61	905.148	34.005	25.188	321.391	1275.39	1284.88	gb|ELU03106.1| hypothetical protein CAPTEDRAFT_221069 [Capitella teleta]	1e-48	46	63	2
comp2069429_c0_seq1	3.44873	1.49452	3.49865	8.79931	17.2886	1.02736	2.86306	2.01853	ref|XP_014266300.1| PREDICTED: olfactory receptor 6N1-like [Maylandia zebra]	4e-06	27	54	4
comp2071630_c0_seq1	2.3227	3.63868	3.23108	27.1347	40.4531	1.45915	3.63596	1.58783	NA	NA	NA	NA	NA
comp2071754_c0_seq1	4.14702	9.5159	12.6244	1.18825	1.45301	3.1497	6.60045	7.73528	NA	NA	NA	NA	NA
comp2077187_c0_seq1	40.0758	22.5005	18.4006	22.862	17.302	25.9585	22.3081	43.944	ref|XP_011418981.1| PREDICTED: uncharacterized protein LOC105322140 isoform X1 [Crassostrea gigas]	1e-20	41	60	2
comp2081623_c0_seq1	11.3557	7.69549	7.24084	0	3.51346	10.6786	6.68433	6.35063	NA	NA	NA	NA	NA
comp2085371_c0_seq1	27.5859	34.9919	40.151	7.41869	14.047	18.8336	33.8242	29.4765	NA	NA	NA	NA	NA
comp2087499_c0_seq1	21.7127	11.6508	13.1137	5.10632	4.61074	21.2348	16.1274	17.2431	NA	NA	NA	NA	NA
comp2088138_c0_seq1	10.7276	8.62525	30.0286	106.895	55.7414	12.1515	8.22447	8.82061	NA	NA	NA	NA	NA
comp2094716_c1_seq1	9.62177	7.50304	9.62294	21.9983	31.5738	13.4714	6.93327	11.4981	ref|XP_013405355.1| PREDICTED: uncharacterized protein LOC106170153 isoform X2 [Lingula anatina] ref|XP_013405356.1| PREDICTED: uncharacterized protein LOC106170153 isoform X2 [Lingula anatina] ref|XP	6e-08	33	50	25
comp2095684_c0_seq1	29.5859	42.5773	32.8422	16.023	10.7919	46.5367	36.0271	43.2785	NA	NA	NA	NA	NA
comp2097010_c0_seq1	526.56	536.05	550.058	1618.27	1095.45	625.042	573.661	527.973	gb|ELU16978.1| hypothetical protein CAPTEDRAFT_157027, partial [Capitella teleta]	8e-14	48	60	5
comp2099081_c0_seq1	69.9575	92.1886	67.2193	23.4757	23.7584	55.1047	84.5801	49.15	NA	NA	NA	NA	NA
comp2101170_c0_seq2	53.933	77.7261	106.245	1.18825	4.10072	128.459	46.2171	35.3845	ref|XP_013387580.1| PREDICTED: fatty acid-binding protein, intestinal-like [Lingula anatina]	4e-12	32	52	5
comp2102458_c0_seq1	682.833	908.826	971.299	1742.67	1645.95	861.227	910.713	1024.26	ref|XP_013383791.1| PREDICTED: uncharacterized protein LOC106154093 isoform X3 [Lingula anatina]	4e-48	43	62	3
comp2105772_c0_seq1	104.101	288.622	134.697	520.222	584.41	142.547	318.761	320.96	ref|XP_013798177.1| PREDICTED: chymotrypsin-like protease CTRL-1 [Apteryx australis mantelli]	2e-30	34	53	5
comp2107254_c0_seq1	8.87441	17.014	15.5511	5.87579	5.65774	14.4832	10.5722	11.8102	ref|XP_011445198.1| PREDICTED: uncharacterized protein LOC105340721 isoform X1 [Crassostrea gigas] ref|XP_011445199.1| PREDICTED: uncharacterized protein LOC105340721 isoform X2 [Crassostrea gigas]	7e-31	32	54	8
comp2107458_c0_seq1	41.9615	49.0528	57.82	327.527	111.556	91.4587	57.9218	34.6686	ref|XP_002771770.1| vacuolar ATP synthase 21 kDa proteolipid subunit, putative [Perkinsus marinus ATCC 50983] gb|EER03586.1| vacuolar ATP synthase 21 kDa proteolipid subunit, putative [Perkinsus marin	1e-42	57	74	4
comp2107597_c0_seq1	28.7661	22.2139	19.8531	51.7646	47.4621	10.1517	31.6878	18.9281	NA	NA	NA	NA	NA
comp2107968_c0_seq2	8.97172	6.84999	9.24957	26.5576	28.1643	12.5128	5.44529	11.1852	gb|ELT87123.1| hypothetical protein CAPTEDRAFT_189077 [Capitella teleta]	1e-34	54	76	0
comp2108252_c0_seq1	109.498	100.621	120.894	76.6471	103.815	171.654	106.518	67.548	NA	NA	NA	NA	NA
comp2109107_c0_seq1	296.521	160.676	208.243	425.565	709.554	204.388	184.635	184.119	NA	NA	NA	NA	NA
comp2111474_c0_seq1	1.49912	7.1808	5.88801	20.4567	23.0805	6.85736	2.51564	4.1971	NA	NA	NA	NA	NA
comp2114676_c0_seq2	21.6376	25.6816	32.183	97.0751	192.827	21.7159	57.2532	13.2913	NA	NA	NA	NA	NA
comp2124976_c0_seq1	10.2778	3.2891	5.7549	1.18825	1.02683	2.45622	4.00363	2.80355	gb|EKC40701.1| Deleted in malignant brain tumors 1 protein [Crassostrea gigas]	1e-13	54	68	3
comp2127369_c0_seq1	155.728	144.549	139.208	14.5796	41.8052	154.074	137.256	95.402	NA	NA	NA	NA	NA
comp2128529_c0_seq1	46.5471	49.8509	39.5036	18.4322	18.6644	52.3181	36.7075	41.693	NA	NA	NA	NA	NA
comp2128864_c0_seq1	366.653	346.68	306.561	269.822	154.207	364.198	331.922	273.726	ref|XP_002044351.1| GM26730 [Drosophila sechellia] gb|EDW52699.1| GM26730 [Drosophila sechellia]	0	100	100	0
comp2130027_c0_seq1	117.69	161.942	135.007	33.5575	41.1205	69.8478	197.375	157.802	NA	NA	NA	NA	NA
comp2133370_c0_seq2	13.3545	17.6394	19.8769	2.37649	8.38929	11.3347	11.7852	14.0428	NA	NA	NA	NA	NA
comp2136393_c0_seq1	142.732	130.588	118.822	282.463	342.109	127.512	143.817	105.934	NA	NA	NA	NA	NA
comp2137193_c0_seq1	31.8634	47.3215	31.4709	195.988	177.907	37.6757	50.6555	36.9785	NA	NA	NA	NA	NA
comp2138000_c0_seq1	412.489	1097.79	690.131	246.279	284.61	747.043	1031.05	1032.81	gb|AGL94564.1| rhabdomeric opsin 3 [Platynereis dumerilii]	0	98	98	0
comp2138043_c0_seq1	43.7412	65.2239	62.8962	27.2629	19.4395	45.2544	31.1608	36.3714	ref|XP_013790827.1| PREDICTED: uncharacterized protein LOC106474682 [Limulus polyphemus]	2e-28	34	55	3
comp2138058_c0_seq1	5666.69	5112.75	7806.2	50.8643	238.914	3102.6	7739.63	10921.2	gb|ELU12969.1| hypothetical protein CAPTEDRAFT_219797 [Capitella teleta]	7e-35	49	68	1
comp2138062_c0_seq1	442.759	335.425	443.384	1061.29	1044.91	462.256	296.149	373.007	ref|XP_014772094.1| PREDICTED: normal mucosa of esophagus-specific gene 1 protein-like [Octopus bimaculoides]	8e-11	40	60	3
comp2138076_c0_seq1	83.7423	150.958	87.8915	2381.61	1736.52	130.422	159.928	132.6	NA	NA	NA	NA	NA
comp2138099_c0_seq1	203.253	831.535	718.573	61.5205	27.0133	221.374	681.659	822.593	gb|ELU18928.1| hypothetical protein CAPTEDRAFT_62161, partial [Capitella teleta]	9e-68	39	57	8
comp2138151_c1_seq1	41.6171	51.345	40.8853	202.888	130.341	37.532	58.567	52.166	NA	NA	NA	NA	NA
comp2138157_c0_seq1	344.169	634.998	697.505	106.509	235.333	321.845	585.42	728.797	gb|ELT90813.1| hypothetical protein CAPTEDRAFT_166512 [Capitella teleta]	0	47	64	2
comp2138236_c0_seq1	47.2282	92.7408	105.78	10.4691	10.6242	26.2297	114.708	86.2433	ref|XP_009052303.1| hypothetical protein LOTGIDRAFT_159540 [Lottia gigantea] gb|ESO96802.1| hypothetical protein LOTGIDRAFT_159540 [Lottia gigantea]	2e-135	51	68	1
comp2138261_c0_seq1	74.2709	96.3248	79.891	16.3135	18.4194	99.5618	88.6948	67.9197	NA	NA	NA	NA	NA
comp2138264_c0_seq1	339.775	256.769	262.528	158.283	75.0774	309.975	269.017	190.044	ref|XP_011660749.1| PREDICTED: uncharacterized protein LOC105436657 [Strongylocentrotus purpuratus]	4e-07	30	52	5
comp2138273_c0_seq1	74.4777	52.3573	51.262	87.0207	74.5865	124.199	45.9798	46.8344	NA	NA	NA	NA	NA
comp2138394_c0_seq1	1296.14	1904.93	1922.59	557.422	588.736	1505.77	1556.43	2196.08	ref|XP_011427761.1| PREDICTED: transketolase-like protein 2 isoform X1 [Crassostrea gigas]	0	73	85	0
comp2138467_c0_seq1	103.057	126.864	107.016	73.6267	41.3456	116.764	125.601	113.127	ref|XP_010751580.1| PREDICTED: oligoribonuclease, mitochondrial [Larimichthys crocea]	3e-88	66	86	0
comp2138515_c0_seq1	54.3341	40.5002	23.6583	15.0926	13.02	54.0584	41.7827	38.1126	NA	NA	NA	NA	NA
comp2138523_c0_seq1	54.5364	54.2534	58.5066	19.6205	22.7717	52.412	50.6117	46.6682	ref|XP_013774981.1| PREDICTED: RNA-binding protein 48-like [Limulus polyphemus]	2e-16	50	69	1
comp2138556_c0_seq1	2.73123	2.14417	0.978802	58.0292	37.2379	2.83388	5.703	1.37214	NA	NA	NA	NA	NA
comp2138577_c0_seq1	1056.71	1911.47	1385.92	192.118	179.338	494.298	877.025	994.718	NA	NA	NA	NA	NA
comp2138612_c0_seq1	135.217	318.264	461.245	31.0488	45.2274	236.881	314.891	553.728	NA	NA	NA	NA	NA
comp2138680_c0_seq3	19.919	22.3514	11.5413	59.9227	67.7148	20.8502	24.0421	19.1148	NA	NA	NA	NA	NA
comp2138717_c0_seq1	147.652	239.67	148.289	63.5817	51.1774	136.622	124.429	108.038	NA	NA	NA	NA	NA
comp2138805_c0_seq2	37.5077	20.8298	30.2659	4.75299	12.6779	35.0781	31.2622	21.4372	NA	NA	NA	NA	NA
comp2138816_c0_seq1	162.025	513.161	535.59	74.8464	56.1135	237.586	464.609	464.198	ref|WP_053977170.1| hypothetical protein [Mangrovimonas sp. ST2L12]	3e-07	34	55	9
comp2138819_c0_seq1	1778.53	1889.6	3666.18	388.889	576.846	1563.21	1467.31	2167.84	ref|XP_013404617.1| PREDICTED: glycine amidinotransferase, mitochondrial-like [Lingula anatina]	0	74	83	2
comp2138826_c0_seq1	43.3785	29.42	22.8254	74.2759	96.2373	54.1475	25.843	24.5322	NA	NA	NA	NA	NA
comp2138837_c0_seq1	342.62	380.105	363.94	138.011	126.497	438.235	250.314	202.594	ref|XP_009064713.1| hypothetical protein LOTGIDRAFT_77223, partial [Lottia gigantea] gb|ESO84560.1| hypothetical protein LOTGIDRAFT_77223, partial [Lottia gigantea]	2e-22	42	57	3
comp2138924_c0_seq1	57.2389	46.1815	30.15	11.5933	20.6608	56.7336	38.7049	31.166	NA	NA	NA	NA	NA
comp2138942_c0_seq1	395.33	212.18	172.006	115.865	98.5063	201.261	235.769	162.853	gb|ELU11063.1| hypothetical protein CAPTEDRAFT_215618 [Capitella teleta]	2e-57	43	57	5
comp2138945_c0_seq1	30.5779	47.6681	47.6069	163.75	155.405	48.1109	40.795	48.6001	NA	NA	NA	NA	NA
comp2138952_c0_seq1	832.5	2003.45	1767.06	504.957	553.661	778.505	2235.52	2225.45	NA	NA	NA	NA	NA
comp2138964_c0_seq1	316.738	260.671	253.365	47.878	105.903	327.461	245.234	234.801	ref|XP_013394447.1| PREDICTED: WD repeat-containing protein 46-like isoform X1 [Lingula anatina]	0	63	83	2
comp2138971_c0_seq1	641.036	521.191	471.197	223.905	173.54	633.723	455.185	471.992	ref|XP_005088889.1| PREDICTED: small nuclear ribonucleoprotein E [Aplysia californica]	2e-50	92	96	1
comp2138995_c0_seq1	52.0757	56.2126	34.3226	872.543	560.281	57.8011	54.7023	34.504	NA	NA	NA	NA	NA
comp2138996_c0_seq1	16.8962	30.1507	24.5505	3.21141	2.73155	22.9454	12.312	11.7766	gb|ELT96105.1| hypothetical protein CAPTEDRAFT_195081 [Capitella teleta]	5e-12	34	55	2
comp2139025_c0_seq1	89.1105	130.68	134.277	34.5848	30.0437	117.976	106.189	97.5285	ref|XP_013420783.1| PREDICTED: DNA polymerase epsilon subunit 4-like [Lingula anatina]	9e-30	53	74	4
comp2139046_c0_seq1	19.5434	26.1139	19.6014	53.7865	121.761	21.7202	16.7673	13.3045	NA	NA	NA	NA	NA
comp2139116_c0_seq1	110.506	105.989	115.587	59.3076	47.3958	143.364	120.168	116.988	ref|XP_009027861.1| hypothetical protein HELRODRAFT_186041 [Helobdella robusta] gb|ESN94133.1| hypothetical protein HELRODRAFT_186041 [Helobdella robusta]	7e-120	56	74	1
comp2139123_c0_seq1	267.244	371.214	252.657	74.8229	107.382	248.664	255.565	154.053	NA	NA	NA	NA	NA
comp2139157_c0_seq1	14.7725	23.9507	22.6107	1.95904	8.89931	11.0204	20.9793	19.5626	NA	NA	NA	NA	NA
comp2139322_c0_seq1	454.034	430.108	384.478	954.405	769.794	491.887	444.803	345.567	NA	NA	NA	NA	NA
comp2139506_c0_seq1	56.4912	65.6384	49.3053	955.302	742.333	20.5049	84.9533	56.8972	NA	NA	NA	NA	NA
comp2139514_c0_seq1	220.374	209.749	194.134	116.432	115.996	257.247	208.709	231.411	gb|ELU18637.1| hypothetical protein CAPTEDRAFT_226413 [Capitella teleta]	6e-110	41	65	3
comp2139590_c0_seq1	276.245	269.942	287.314	2024.56	643.163	334.4	264.395	294.631	NA	NA	NA	NA	NA
comp2139708_c0_seq1	51.3369	64.427	57.5734	13.5497	16.2684	58.1152	68.552	42.2956	ref|XP_013774969.1| PREDICTED: methyltransferase-like protein 23 isoform X1 [Limulus polyphemus]	6e-69	54	70	2
comp2139723_c0_seq1	460.803	564.664	629.9	357.839	244.162	542.576	756.768	757.561	gb|ELU10749.1| hypothetical protein CAPTEDRAFT_219406 [Capitella teleta]	5e-165	71	83	0
comp2139746_c0_seq2	1300.06	1898.98	1826.82	595.024	593.142	939.594	1224.04	1178.58	NA	NA	NA	NA	NA
comp2139772_c0_seq1	433.924	309.593	281.121	42.7416	136.506	461.967	439.565	319.768	NA	NA	NA	NA	NA
comp2139868_c0_seq1	239.077	231.841	198.727	120.356	104.966	244.237	166.692	187.083	gb|EFX81904.1| putative histone deacetylase HDAC3 protein [Daphnia pulex]	0	78	89	0
comp2140131_c0_seq1	134.449	120.42	121.522	479.103	371.884	168.424	107.804	125.35	gb|ELU09461.1| hypothetical protein CAPTEDRAFT_223662 [Capitella teleta]	5e-05	24	43	8
comp2140166_c0_seq1	1052.53	1722.75	1669.34	4566.96	2642.97	1233.28	1737.19	1914.86	gb|ELT88410.1| hypothetical protein CAPTEDRAFT_172212 [Capitella teleta]	0	58	73	0
comp2140173_c0_seq1	80.9522	89.473	97.904	70.8995	55.812	76.0221	106.99	96.6385	ref|XP_002736879.1| PREDICTED: uncharacterized protein LOC100367272 [Saccoglossus kowalevskii]	3e-35	43	54	4
comp2140180_c0_seq1	64.2545	95.5044	75.8344	22.3516	32.2014	64.7718	78.7272	81.8424	NA	NA	NA	NA	NA
comp2140200_c0_seq1	14.0349	30.0026	27.9012	2.50474	3.93285	16.4557	21.434	35.3756	ref|XP_002818938.1| PREDICTED: phosphatidylethanolamine-binding protein 4 [Pongo abelii]	4e-22	41	59	6
comp2140238_c0_seq1	1169.2	1039.76	929.268	3080.28	2533.81	1091.47	1202.84	1150.54	ref|XP_011436481.1| PREDICTED: parkin coregulated gene protein homolog isoform X1 [Crassostrea gigas]	8e-120	84	89	1
comp2140245_c0_seq1	84.7236	77.7687	62.2146	40.5901	40.0601	94.5812	59.9477	68.2309	gb|ELU13494.1| hypothetical protein CAPTEDRAFT_228646 [Capitella teleta]	3e-36	47	61	7
comp2140276_c0_seq1	81.694	75.8183	82.8795	32.8194	33.849	114.694	76.6342	55.9116	ref|XP_003388531.1| PREDICTED: putative uncharacterized protein At4g01020, chloroplastic [Amphimedon queenslandica]	3e-20	36	52	3
comp2140307_c0_seq1	10.8491	40.4553	67.9618	9.5701	8.47973	27.8953	37.2632	34.018	NA	NA	NA	NA	NA
comp2140431_c0_seq1	34.8507	36.8756	42.8129	19.7801	20.0202	41.0007	35.2511	30.9671	ref|XP_013419993.1| PREDICTED: uncharacterized protein LOC106180531 [Lingula anatina]	2e-46	48	70	0
comp2140459_c0_seq2	9.75023	20.6148	25.8387	281.62	372.212	8.94076	15.7657	10.2135	NA	NA	NA	NA	NA
comp2140493_c0_seq1	350.659	175.17	162.42	25.0814	55.0136	175.927	155.234	353.412	NA	NA	NA	NA	NA
comp2140537_c0_seq1	77.057	135.473	143.788	292.933	440.417	53.1894	81.1382	64.8712	ref|WP_020534160.1| hypothetical protein [Lewinella cohaerens]	2e-86	53	63	4
comp2140539_c0_seq1	223.073	146.477	129.457	65.9268	107.627	186.587	153.806	129.705	NA	NA	NA	NA	NA
comp2140544_c0_seq1	20.1031	18.2017	15.2381	71.6429	46.2009	14.7359	21.0778	20.2512	NA	NA	NA	NA	NA
comp2140636_c0_seq1	282.745	340.684	338.43	101.7	101.425	349.564	333.365	341.948	gb|ELU09588.1| hypothetical protein CAPTEDRAFT_229355 [Capitella teleta]	8e-171	69	81	0
comp2140647_c0_seq2	169.109	60.684	99.2887	14.5469	8.65439	53.0187	98.4879	126.505	NA	NA	NA	NA	NA
comp2140683_c0_seq1	1473.77	674.787	1337.27	30.6994	255.44	731.495	439.581	865.413	NA	NA	NA	NA	NA
comp2140776_c0_seq1	85.2145	125.158	116.646	75.2377	45.6977	115.16	90.7407	103.25	ref|XP_013415638.1| PREDICTED: peroxisomal membrane protein PEX16-like isoform X1 [Lingula anatina]	3e-91	46	66	2
comp2140778_c0_seq1	70.1834	58.4215	64.3552	418.205	218.051	101.626	63.2511	65.426	NA	NA	NA	NA	NA
comp2140791_c0_seq1	84.2166	88.2405	78.9744	29.5753	41.1137	81.5742	86.0515	62.85	NA	NA	NA	NA	NA
comp2140816_c0_seq1	18.5768	14.8714	8.47464	2.85808	1.02683	8.15803	14.3008	16.6352	ref|XP_009048449.1| hypothetical protein LOTGIDRAFT_205189 [Lottia gigantea] gb|ESP00913.1| hypothetical protein LOTGIDRAFT_205189 [Lottia gigantea]	2e-33	42	55	2
comp2140836_c0_seq1	12.5867	20.57	20.8632	49.6145	43.4631	11.9615	14.6163	10.255	NA	NA	NA	NA	NA
comp2141175_c0_seq1	211.859	287.741	257.413	63.8382	60.9765	246.447	224.81	211.56	gb|ELT91351.1| hypothetical protein CAPTEDRAFT_175631 [Capitella teleta]	9e-56	42	65	1
comp2141229_c0_seq1	28506.3	27019.9	25578.2	17440.2	14939.2	27771.6	29477.6	25025.5	gb|KIL68019.1| hypothetical protein M378DRAFT_72303 [Amanita muscaria Koide BX008]	1e-48	51	67	4
comp2141370_c0_seq1	55.1197	38.2785	36.6838	9.0872	11.6574	51.5315	47.7255	28.6944	NA	NA	NA	NA	NA
comp2141469_c0_seq1	150.147	155.198	151.655	362.283	328.215	199.192	137.806	129.109	ref|XP_002604648.1| hypothetical protein BRAFLDRAFT_126791 [Branchiostoma floridae] gb|EEN60659.1| hypothetical protein BRAFLDRAFT_126791 [Branchiostoma floridae]	4e-145	52	69	3
comp2141503_c0_seq1	35.8591	31.099	25.0321	10.4678	14.2147	48.0513	25.096	24.1644	ref|XP_002734205.1| PREDICTED: ribonuclease P/MRP protein subunit POP5-like [Saccoglossus kowalevskii]	9e-36	47	69	0
comp2141558_c0_seq1	12.7764	19.1797	23.8827	33.7839	30.0365	24.1159	18.0236	16.0784	NA	NA	NA	NA	NA
comp2141643_c0_seq1	371.279	559.775	447.945	167.693	229.721	395.303	395.004	257.533	NA	NA	NA	NA	NA
comp2141694_c0_seq1	9.21677	15.109	15.6527	35.4838	34.3387	13.6435	19.9779	14.5996	NA	NA	NA	NA	NA
comp2141714_c0_seq1	187.099	201.888	170.327	1903.79	2094.59	179.852	242.156	249.252	NA	NA	NA	NA	NA
comp2141716_c0_seq3	45.1926	36.74	44.3319	105.166	83.4287	78.7649	34.4146	39.8757	NA	NA	NA	NA	NA
comp2141733_c0_seq1	259.01	246.384	223.532	62.332	94.1542	301.345	205.82	179.162	NA	NA	NA	NA	NA
comp2141837_c0_seq1	83.044	67.7646	66.806	115.793	104.667	97.5966	53.5009	57.7645	ref|XP_013412528.1| PREDICTED: nicolin-1-like [Lingula anatina]	1e-53	45	64	3
comp2141895_c0_seq2	28.6744	24.6616	29.9016	0.834915	3.93964	20.7343	27.8868	38.0593	gb|ELT90484.1| hypothetical protein CAPTEDRAFT_108871, partial [Capitella teleta]	4e-26	48	73	0
comp2141958_c0_seq2	1.42413	0.443957	0.190648	407.274	605.562	1.12527	0.321343	0.637499	NA	NA	NA	NA	NA
comp2141997_c0_seq1	14127.1	17724.4	15441.3	8842.98	6325.13	15051.6	15631.5	11356.6	ref|XP_013385025.1| PREDICTED: uncharacterized protein LOC106154987 [Lingula anatina]	2e-05	31	47	8
comp2142011_c0_seq1	50.1275	78.2889	65.4147	120.072	104.687	55.2798	80.5857	50.6684	NA	NA	NA	NA	NA
comp2142021_c1_seq1	69.0755	215.869	209.923	870.143	460.648	81.3845	666.245	117.253	NA	NA	NA	NA	NA
comp2142030_c0_seq1	276.956	354.391	251.549	501.894	765.221	283.74	121.459	102.417	NA	NA	NA	NA	NA
comp2142040_c0_seq1	34.757	281.197	357.281	114.509	14.6475	27.2445	225.922	95.9061	NA	NA	NA	NA	NA
comp2142068_c0_seq1	39.0576	117.466	115.392	19.8456	10.9262	56.5783	105.323	115.881	NA	NA	NA	NA	NA
comp2142074_c0_seq1	108.41	121.693	114.111	219.837	153.989	182.651	119.348	113.199	ref|XP_002611101.1| hypothetical protein BRAFLDRAFT_206058 [Branchiostoma floridae] gb|EEN67111.1| hypothetical protein BRAFLDRAFT_206058 [Branchiostoma floridae]	6e-146	55	73	0
comp2142128_c0_seq1	32.5424	120.417	107.744	16.6328	15.8422	49.8832	71.7797	84.041	NA	NA	NA	NA	NA
comp2142314_c0_seq2	170.128	170.476	159.779	51.249	76.7078	189.907	204.396	175.284	ref|NP_001012912.1| SET and MYND domain-containing protein 5 [Gallus gallus] sp|Q5ZIZ2.1|SMYD5_CHICK RecName: Full=SET and MYND domain-containing protein 5 emb|CAG32301.1| hypothetical protein RCJMB04	2e-171	65	79	0
comp2142340_c0_seq1	15.2958	20.2826	25.669	1.25237	2.47984	9.84577	31.2969	30.38	gb|AHB62372.1| SHM neuropeptide precursor, partial [Platynereis dumerilii]	1e-60	100	100	0
comp2142425_c0_seq1	49.5141	93.7268	81.9433	229.851	387.371	64.4867	48.6807	51.3112	emb|CAM91770.1| hypothetical protein [Platynereis dumerilii]	4e-43	60	81	0
comp2142434_c0_seq1	941.403	1100.69	1122.79	674.084	656.094	1050.03	1004.3	1066.83	ref|XP_011422148.1| PREDICTED: structure-specific endonuclease subunit SLX4-like [Crassostrea gigas]	2e-39	27	46	18
comp2142438_c0_seq1	633.662	871.012	829.613	1317.57	1413.79	561.559	671.454	658.385	NA	NA	NA	NA	NA
comp2142514_c0_seq2	93.7035	145.667	163.74	14.4199	13.5101	83.6484	76.4287	74.8581	NA	NA	NA	NA	NA
comp2142543_c0_seq1	80.8234	109.499	104.968	49.485	52.4026	101.893	97.7261	92.8138	ref|XP_013386719.1| PREDICTED: general transcription factor 3C polypeptide 4-like [Lingula anatina]	7e-46	26	42	16
comp2142559_c0_seq1	36.686	47.3947	55.1131	58.1574	77.6136	48.6166	46.8104	45.5134	NA	NA	NA	NA	NA
comp2142601_c0_seq1	405.53	244.604	201.583	63.579	130.856	409.209	316.65	237.132	NA	NA	NA	NA	NA
comp2142602_c0_seq1	69.0407	46.4534	50.8448	12.8129	18.6644	57.8906	47.7515	53.985	ref|XP_009704361.1| PREDICTED: prolyl endopeptidase, partial [Cariama cristata] ref|XP_009986440.1| PREDICTED: prolyl endopeptidase, partial [Tauraco erythrolophus]	8e-113	51	68	2
comp2142609_c0_seq2	66.2431	47.8218	43.3465	101.697	104.63	78.6747	48.0034	43.3664	NA	NA	NA	NA	NA
comp2142646_c0_seq4	35718.2	34078.7	14843.1	3417.87	2191.57	57419.3	23069.3	16265.8	gb|ERE89158.1| alanine--glyoxylate aminotransferase 2-like 1 [Cricetulus griseus]	3e-06	53	60	14
comp2142660_c0_seq1	635.782	494.315	525.239	1266.85	943.183	722.63	501.958	455.594	gb|ELT93535.1| hypothetical protein CAPTEDRAFT_221669 [Capitella teleta]	2e-28	47	74	3
comp2142739_c0_seq1	89.5526	126.465	124.044	183.528	409.084	63.0438	115.006	100.994	NA	NA	NA	NA	NA
comp2142743_c0_seq3	424.315	543.459	570.99	426.69	362.269	547.319	603.788	579.925	ref|XP_014669764.1| PREDICTED: peptidase M20 domain-containing protein 2-like isoform X1 [Priapulus caudatus]	4e-102	49	64	1
comp2142763_c0_seq1	29.0273	26.6606	20.3853	6.35738	5.81883	30.2864	24.6269	21.2571	NA	NA	NA	NA	NA
comp2142773_c0_seq1	35.5607	34.6694	23.7092	13.6792	11.8253	46.2716	33.0802	31.9375	NA	NA	NA	NA	NA
comp2142776_c0_seq1	101.604	43.9313	44.9713	9.98624	16.7852	53.0649	25.1711	22.1673	gb|ACO13968.1| Heme-binding protein 2 [Esox lucius]	2e-15	49	64	1
comp2142789_c0_seq2	229.44	209.867	219.294	54.2053	83.0602	280.489	187.089	208.018	ref|XP_013410672.1| PREDICTED: G1/S-specific cyclin-D2-like [Lingula anatina]	3e-116	67	80	3
comp2142794_c0_seq1	1885.2	1468.88	1833.57	242.385	312.195	889.003	1260.44	2042.2	NA	NA	NA	NA	NA
comp2142807_c0_seq1	834.487	1778.71	2071.18	228.044	211.478	644.904	1304.61	1686.26	emb|CAX48992.1| water-specific aquaporin [Lumbricus rubellus]	1e-77	52	67	7
comp2142810_c0_seq2	48.4367	67.3448	86.7812	5.45834	1.45301	11.1326	103.687	47.8145	NA	NA	NA	NA	NA
comp2142831_c0_seq2	35705.4	25615.8	24505.3	19032.5	15629.4	31249.9	31126.8	27062.7	gb|AAO43049.1| 40S ribosomal protein [Perinereis aibuhitensis]	1e-91	96	99	0
comp2142832_c0_seq1	4.09095	8.75311	10.9608	4.68755	1.45301	2.69172	6.50484	7.34311	NA	NA	NA	NA	NA
comp2142853_c0_seq1	144.529	151.924	169.891	104.517	51.8856	208.304	165.115	144.066	ref|XP_013399149.1| PREDICTED: exosome complex component MTR3-like [Lingula anatina]	3e-115	61	79	0
comp2142866_c0_seq1	1551.62	2078.31	2009.47	1611.67	854.581	1936.75	2430.9	2109.77	gb|ELT98159.1| hypothetical protein CAPTEDRAFT_226124 [Capitella teleta]	0	72	84	0
comp2142899_c0_seq1	443.396	781.535	829.799	1411.01	1025.37	425.162	724.292	736.038	gb|ELU06864.1| hypothetical protein CAPTEDRAFT_228546 [Capitella teleta]	2e-122	54	71	4
comp2142927_c0_seq1	27.3877	47.0098	52.6034	10.8552	7.35567	32.8706	36.8377	44.683	gb|KFM68369.1| Protein fem-1-like protein, partial [Stegodyphus mimosarum]	2e-08	34	52	17
comp2142969_c0_seq1	49.0337	62.4993	48.299	202.849	128.975	61.0859	66.899	54.8391	NA	NA	NA	NA	NA
comp2143063_c0_seq1	202.694	172.146	164.835	323.806	247.676	273.072	152.414	125.741	gb|ELT92156.1| hypothetical protein CAPTEDRAFT_6071 [Capitella teleta]	3e-76	66	86	1
comp2143145_c0_seq4	2481.74	3173.48	2804.01	7396.06	5441.09	2817.31	3784.7	2422.82	NA	NA	NA	NA	NA
comp2143146_c0_seq1	537.961	407.915	413.083	1012.07	837.368	658.508	439.074	384.263	gb|ELT88739.1| hypothetical protein CAPTEDRAFT_161113 [Capitella teleta]	4e-34	74	89	2
comp2143160_c0_seq1	374.36	326.159	275.193	1113.06	892.563	377.929	360.915	418.551	ref|XP_012940463.1| PREDICTED: outer dense fiber protein 3-like [Aplysia californica]	2e-100	66	76	0
comp2143185_c0_seq1	2060.47	2704.08	2558.22	3674.35	3700.33	2216.84	2761.23	2343.35	ref|XP_005110710.1| PREDICTED: charged multivesicular body protein 4c-like [Aplysia californica]	3e-75	76	86	1
comp2143231_c0_seq1	521.997	527.706	531.233	1107.13	979.989	600.851	559.115	630.82	gb|ELT96814.1| hypothetical protein CAPTEDRAFT_205146 [Capitella teleta]	5e-23	48	68	4
comp2143334_c0_seq2	99576.6	96349.2	90345.4	59902.4	44531.3	94483.5	106050	106792	ref|XP_011432966.1| PREDICTED: 40S ribosomal protein S2 [Crassostrea gigas]	1e-150	90	94	0
comp2143340_c0_seq1	692.431	1086.73	892.409	198.344	221.021	735.232	1023.72	849.666	NA	NA	NA	NA	NA
comp2143351_c0_seq1	35.618	21.0284	12.9448	26.4594	21.5836	40.9841	13.525	8.9688	NA	NA	NA	NA	NA
comp2143377_c1_seq1	42.9577	43.5267	54.4815	3.62887	21.178	31.0517	32.944	39.2714	NA	NA	NA	NA	NA
comp2143410_c0_seq1	70.9272	137.125	142.244	369.361	200.486	78.4065	129.408	158.011	gb|ELU15281.1| hypothetical protein CAPTEDRAFT_221561 [Capitella teleta]	3e-37	45	65	0
comp2143430_c0_seq1	34.7914	38.0821	30.0497	2.85808	4.19794	59.8103	30.3042	24.6883	NA	NA	NA	NA	NA
comp2144864_c1_seq1	3.45841	2.66867	3.43959	36.4509	23.2885	1.61071	2.79943	7.14454	NA	NA	NA	NA	NA
comp2146245_c0_seq1	4.2579	4.01653	2.62189	24.435	13.0398	9.32096	3.82709	5.29494	NA	NA	NA	NA	NA
comp2146773_c0_seq2	0.124927	0.350188	1.01032	11.8183	26.2213	1.32437	0.845299	0.607861	NA	NA	NA	NA	NA
comp2146858_c0_seq1	13.433	11.2702	14.4325	3.14728	2.90602	11.2536	12.2165	12.1563	NA	NA	NA	NA	NA
comp2146953_c0_seq1	5.78591	6.94991	7.30983	42.0689	42.067	3.75266	4.7129	5.6071	NA	NA	NA	NA	NA
comp2148606_c0_seq1	8.24108	13.2213	14.5731	0.417457	2.47984	4.52491	10.0569	6.22747	ref|XP_011427412.1| PREDICTED: ankyrin-3-like [Crassostrea gigas]	3e-16	27	44	19
comp2149705_c0_seq1	10.5067	8.27626	12.3826	1.25237	0.852361	6.35151	8.12895	5.36244	NA	NA	NA	NA	NA
comp2150474_c0_seq1	0	1.08315	0.854937	9.37509	3.42283	0.286337	0.825045	0.793913	emb|CFQ47647.1| Uncharacterised protein [Yersinia aleksiciae]	5e-06	48	70	0
comp2151930_c0_seq1	1.67878	1.47577	1.70392	12.5878	12.2515	2.18338	1.14639	2.3432	NA	NA	NA	NA	NA
comp2154037_c0_seq1	9.18994	19.3485	21.2522	3.62887	6.50331	16.7591	24.4215	11.5217	NA	NA	NA	NA	NA
comp2154128_c0_seq1	8.61311	8.96497	9.42633	0.77079	0.600649	11.6477	10.08	9.75381	NA	NA	NA	NA	NA
comp2154653_c0_seq1	2.9938	7.47381	10.5327	18.3053	35.849	4.83415	4.46978	5.07036	NA	NA	NA	NA	NA
comp2155820_c0_seq1	11.3343	14.904	14.9809	20.6818	33.3891	5.91643	11.4204	9.96061	NA	NA	NA	NA	NA
comp2155984_c0_seq2	573.592	692.988	700.616	969.896	756.871	707.898	659.861	575.305	gb|ELU18277.1| hypothetical protein CAPTEDRAFT_148248 [Capitella teleta]	0	70	82	3
comp2156066_c0_seq1	7.08164	2.95152	3.86231	11.9466	22.4493	5.63418	3.526	6.73163	NA	NA	NA	NA	NA
comp2156804_c0_seq1	18.2002	16.5606	50.7581	6.29325	9.76506	22.3417	21.5033	22.2476	NA	NA	NA	NA	NA
comp2157231_c0_seq1	6.43773	4.84818	4.66017	17.0516	13.0905	14.6897	3.23073	3.28463	gb|ELU06231.1| hypothetical protein CAPTEDRAFT_196923 [Capitella teleta]	5e-09	34	56	9
comp2158525_c0_seq1	14.7542	19.9984	24.545	1.66983	8.29866	18.2528	15.0999	12.3631	ref|XP_002609506.1| hypothetical protein BRAFLDRAFT_95599 [Branchiostoma floridae] gb|EEN65516.1| hypothetical protein BRAFLDRAFT_95599 [Branchiostoma floridae]	3e-26	31	51	10
comp2158971_c0_seq1	1.08924	6.44479	5.64295	0	92.3901	0.673873	0.845299	0.911792	NA	NA	NA	NA	NA
comp2159913_c0_seq2	12.6724	10.314	8.99612	1.54158	1.45301	11.7231	8.47637	5.74277	NA	NA	NA	NA	NA
comp2160185_c0_seq1	7.55939	2.69789	1.20097	30.5659	7.62077	4.09063	1.74275	1.46105	ref|WP_022684601.1| hypothetical protein [Sphingobium sp. YL23]	6e-20	43	56	7
comp2160442_c0_seq1	4.95753	16.8219	15.6196	2.79395	3.42942	5.38063	13.7855	10.2616	NA	NA	NA	NA	NA
comp2166111_c0_seq1	39.021	2.64932	0.886455	0	0.42618	0.973704	1.92511	1.58783	NA	NA	NA	NA	NA
comp2173693_c0_seq1	0	0.106992	0	14.5469	15.8793	0.519017	0	0	NA	NA	NA	NA	NA
comp2176475_c0_seq1	5.80999	5.87723	4.1982	88.4734	154.059	2.29807	8.89037	4.3232	gb|ELT98391.1| hypothetical protein CAPTEDRAFT_204973 [Capitella teleta]	6e-05	48	70	8
comp2177447_c0_seq1	12.6873	6.52749	7.03256	1.6057	2.14429	9.08137	7.23436	6.3121	NA	NA	NA	NA	NA
comp2178895_c0_seq1	1.75244	9.62781	12.0401	0.417457	0.852361	9.3029	1.74275	4.67818	emb|CBY21220.1| unnamed protein product [Oikopleura dioica]	6e-07	40	59	1
comp2179803_c0_seq1	3.94541	1.00813	2.34485	0	0	1.70123	2.08434	2.19569	emb|CKP92744.1| DNA polymerase III subunit alpha [Mycobacterium tuberculosis]	7e-19	32	44	16
comp2180515_c1_seq1	3.55925	0.930348	0.904088	0	0	1.78517	1.19272	0.667137	NA	NA	NA	NA	NA
comp2184390_c0_seq1	51.9347	28.4518	22.8446	14.9316	19.4463	34.9822	34.9849	30.241	NA	NA	NA	NA	NA
comp2184435_c0_seq1	10.4971	8.49457	8.67565	0.417457	2.57047	7.03511	7.43698	7.13927	ref|XP_012940361.1| PREDICTED: malignant fibrous histiocytoma-amplified sequence 1 homolog [Aplysia californica]	6e-45	51	70	1
comp2184659_c0_seq1	0	7.56664	3.02059	5.00949	5.40584	0.838929	4.67526	6.13034	NA	NA	NA	NA	NA
comp2184756_c0_seq1	1.38557	3.23224	2.93045	102.99	88.9871	4.33648	0.825045	1.12748	NA	NA	NA	NA	NA
comp2184876_c0_seq2	30.2114	26.5598	25.412	6.84028	10.5336	21.8489	24.4505	24.7344	NA	NA	NA	NA	NA
comp2185299_c0_seq1	1.40965	1.13111	0.695808	10.918	15.2615	1.45915	0.570284	1.09784	NA	NA	NA	NA	NA
comp2185368_c0_seq1	4.28509	1.26731	3.10744	0	0	3.20006	2.5359	1.25426	gb|KFG41093.1| HEAT repeat-containing protein, partial [Toxoplasma gondii FOU]	8e-29	34	56	3
comp2185740_c0_seq1	4.41002	3.76167	2.65937	18.5932	28.4628	1.98757	6.27329	4.7717	NA	NA	NA	NA	NA
comp2185804_c0_seq1	11.99	3.22948	3.699	1.66983	2.74494	4.96233	2.11042	3.72424	ref|WP_039789973.1| iron transporter [Herbaspirillum huttiense]	0	99	99	0
comp2186478_c0_seq1	5.39495	14.1975	13.6852	13.8415	17.7148	10.227	14.0576	12.9406	NA	NA	NA	NA	NA
comp2186746_c0_seq1	4.22032	1.98644	4.04921	13.5523	39.2117	6.26051	4.07603	7.48996	NA	NA	NA	NA	NA
comp2187328_c0_seq1	71.5044	238.11	289.957	25.4622	9.04701	61.5148	167.106	195.031	ref|XP_010754408.1| PREDICTED: probable G-protein coupled receptor 133, partial [Larimichthys crocea]	3e-09	30	45	9
comp2187751_c0_seq1	9.87248	3.73523	2.25823	21.9015	16.9395	8.92807	5.0545	5.02887	ref|XP_002606848.1| hypothetical protein BRAFLDRAFT_103544 [Branchiostoma floridae] gb|EEN62858.1| hypothetical protein BRAFLDRAFT_103544 [Branchiostoma floridae]	3e-45	42	57	3
comp2188296_c0_seq1	360.582	395.336	385.804	203.487	155.735	398.533	346.877	415.329	gb|ELU08443.1| hypothetical protein CAPTEDRAFT_21960 [Capitella teleta]	3e-94	57	71	0
comp2188428_c0_seq1	14.7546	9.57985	16.7608	2.08729	2.65431	12.0475	9.97008	8.2549	NA	NA	NA	NA	NA
comp2188572_c0_seq1	19.1305	38.0921	37.9288	53.3376	42.2814	25.9742	38.21	26.8033	NA	NA	NA	NA	NA
comp2188679_c0_seq1	25.0262	12.9661	12.5891	3.21141	3.08049	17.58	19.2975	8.85914	NA	NA	NA	NA	NA
comp2188826_c0_seq1	37.0713	1.56678	3.91323	6.77483	2.30537	2.97806	72.4759	3.04887	ref|XP_013071443.1| PREDICTED: uncharacterized protein LOC106058534, partial [Biomphalaria glabrata]	6e-72	31	50	13
comp2188878_c0_seq2	43.2016	3.88742	6.14811	13.5497	6.93628	7.61437	5.51769	3.6271	NA	NA	NA	NA	NA
comp2189190_c0_seq1	17.3085	8.51176	7.00897	0.834915	4.44966	15.747	12.1703	10.8131	ref|XP_002932741.2| PREDICTED: chromaffin granule amine transporter-like isoform X1 [Xenopus tropicalis] ref|XP_012814880.1| PREDICTED: chromaffin granule amine transporter-like isoform X1 [Xenopus tr	1e-08	28	48	0
comp2189631_c0_seq1	15.5895	18.6755	16.1602	34.1673	35.1136	18.5079	16.4634	15.1238	NA	NA	NA	NA	NA
comp2189739_c0_seq1	12.2188	27.5258	18.2318	9.0244	5.48308	15.2305	17.9977	16.6152	ref|XP_012946778.1| PREDICTED: beta-1,3-galactosyl-O-glycosyl-glycoprotein beta-1,6-N-acetylglucosaminyltransferase-like [Aplysia californica]	5e-37	44	60	6
comp2189817_c0_seq2	12.6493	21.9938	25.5395	4.75299	7.11056	9.80843	18.4291	19.1615	NA	NA	NA	NA	NA
comp2190140_c0_seq1	5.25731	4.21607	4.16889	30.6693	19.3221	3.10672	4.18894	7.02139	NA	NA	NA	NA	NA
comp2190259_c0_seq1	19.9675	22.1198	21.1916	2.02316	3.84901	9.54452	18.7042	14.0474	NA	NA	NA	NA	NA
comp2190307_c0_seq2	82.4433	59.1566	70.8866	12.7161	25.3222	80.4293	64.1484	51.9598	ref|XP_006822436.1| PREDICTED: uncharacterized protein K02A2.6-like [Saccoglossus kowalevskii]	1e-92	43	60	8
comp2190329_c0_seq1	17.2539	21.333	13.5265	55.5205	80.0258	26.1195	17.659	10.902	NA	NA	NA	NA	NA
comp2190469_c0_seq1	12.626	8.4472	7.31335	2.37649	1.45301	21.2001	12.0602	5.35355	NA	NA	NA	NA	NA
comp2190681_c0_seq1	10.1048	2.35816	4.6249	9.92344	25.5368	4.06364	4.48421	3.91029	NA	NA	NA	NA	NA
comp2190979_c0_seq1	41.4962	61.2406	68.4793	36.9586	28.2282	42.6773	61.6934	35.6809	NA	NA	NA	NA	NA
comp2191227_c0_seq1	12.2192	18.4219	15.7142	45.9844	28.5637	11.4158	25.1018	17.2787	ref|XP_013393681.1| PREDICTED: uncharacterized protein LOC106161315 isoform X1 [Lingula anatina]	3e-39	45	66	2
comp2191516_c0_seq1	26.6898	42.5727	39.789	17.4691	21.3255	36.5426	32.9786	43.512	NA	NA	NA	NA	NA
comp2191837_c0_seq1	12.9626	7.8102	9.5782	0.417457	2.14429	3.81746	6.07068	7.36846	NA	NA	NA	NA	NA
comp2191855_c0_seq1	0.893767	2.60135	1.24416	12.5878	12.057	1.14535	1.46773	1.43141	NA	NA	NA	NA	NA
comp2191864_c0_seq1	44.2663	13.1721	20.1676	137.672	109.825	23.5209	20.0125	23.0696	NA	NA	NA	NA	NA
comp2192093_c0_seq2	9.61563	13.4691	18.8489	1.95904	4.54028	12.9577	13.5656	11.7641	ref|XP_011446877.1| PREDICTED: RNA-directed DNA polymerase from mobile element jockey-like [Crassostrea gigas]	1e-44	50	69	7
comp2192120_c0_seq1	5.84685	3.44346	4.94316	22.5741	35.6306	5.00047	2.2667	3.91391	gb|ELU17632.1| hypothetical protein CAPTEDRAFT_185210 [Capitella teleta]	4e-06	38	56	5
comp2192188_c0_seq2	798.405	1058.05	1113.07	1478.4	1554.18	849.186	1184.96	960.516	gb|ELU05209.1| hypothetical protein CAPTEDRAFT_227168 [Capitella teleta]	3e-124	63	73	16
comp2192355_c0_seq1	1.75244	2.8848	1.02795	47.9447	47.3251	0	1.19272	2.57963	NA	NA	NA	NA	NA
comp2192374_c0_seq2	13.3607	23.1916	26.3862	39.979	65.262	11.3302	15.0246	17.5994	NA	NA	NA	NA	NA
comp2192575_c0_seq1	6.36895	7.51565	7.20909	0.77079	1.54364	3.83378	7.46019	10.4424	ref|XP_001622294.1| hypothetical protein NEMVEDRAFT_v1g52734 [Nematostella vectensis] gb|EDO30194.1| predicted protein, partial [Nematostella vectensis]	3e-34	45	56	7
comp2192779_c0_seq1	25.9434	22.9856	15.3247	2.44062	3.5973	28.4387	17.8763	19.4678	NA	NA	NA	NA	NA
comp2193065_c0_seq1	9.94874	14.1495	12.6867	22.6395	33.124	10.7682	21.4832	18.3528	NA	NA	NA	NA	NA
comp2193499_c0_seq1	20.9834	35.8691	34.5776	3.50062	10.3589	19.6537	24.2248	34.4372	NA	NA	NA	NA	NA
comp2193513_c0_seq1	7.05445	8.18247	9.3807	35.6801	54.6271	6.61729	6.04165	5.32391	NA	NA	NA	NA	NA
comp2193521_c0_seq1	47.2992	39.4351	34.4767	0.77079	1.96982	49.3992	23.0059	36.2545	gb|ELT93489.1| hypothetical protein CAPTEDRAFT_123695 [Capitella teleta]	2e-58	53	68	1
comp2193809_c0_seq1	3.75784	6.50319	5.03353	33.9763	26.5499	4.01609	5.80714	9.61452	NA	NA	NA	NA	NA
comp2193984_c0_seq1	10.1697	7.80679	4.84486	110.492	75.016	13.1408	8.76286	6.75532	gb|AKQ63062.1| orphan G-protein coupled receptor 57 [Platynereis dumerilii]	4e-99	72	83	2
comp2194038_c0_seq1	1.71388	0.245959	0.805787	9.79255	125.534	0.892585	1.94536	0.460344	NA	NA	NA	NA	NA
comp2194151_c0_seq1	10.6193	10.3626	19.2673	0	0	3.21356	10.2769	14.6589	NA	NA	NA	NA	NA
comp2194193_c0_seq1	4.43063	8.06227	6.43505	16.6996	12.9799	8.85231	7.62516	6.27423	ref|XP_013418064.1| PREDICTED: myoferlin-like [Lingula anatina]	3e-07	60	79	0
comp2194542_c0_seq2	18.6508	9.68408	15.6212	59.2408	37.0301	14.6192	5.86511	10.0317	gb|KDR09972.1| Guanylate cyclase 32E [Zootermopsis nevadensis]	3e-43	62	82	0
comp2194633_c0_seq2	21.3489	16.6973	17.9188	55.7769	50.8316	37.1638	12.9344	19.7612	NA	NA	NA	NA	NA
comp2194677_c0_seq1	72.978	70.6661	56.0456	28.0992	35.5268	69.6377	75.6815	61.8404	NA	NA	NA	NA	NA
comp2195144_c0_seq1	32.6691	40.4565	50.0414	91.5199	154.295	53.1475	39.4199	43.9565	NA	NA	NA	NA	NA
comp2195155_c0_seq1	5.69297	4.69202	3.83675	20.9042	28.6241	3.08946	4.51029	5.54849	NA	NA	NA	NA	NA
comp2195212_c0_seq1	13.4832	77.0604	74.4938	10.3396	3.93285	10.171	45.8698	58.5179	NA	NA	NA	NA	NA
comp2195493_c0_seq1	10.6953	17.9714	20.0375	0.417457	1.96982	15.4233	15.676	8.27202	NA	NA	NA	NA	NA
comp2195994_c0_seq1	34.8595	163.433	170.921	3.62887	13.0266	38.6999	107.121	93.4085	gb|ELU05611.1| hypothetical protein CAPTEDRAFT_217455 [Capitella teleta]	7e-35	37	57	2
comp2196066_c0_seq1	14.7941	34.1918	21.6258	4.75299	4.87584	12.1765	26.4218	17.8434	NA	NA	NA	NA	NA
comp2196076_c0_seq1	6.56132	1.16308	2.80086	0	0.42618	2.74538	2.28696	4.27349	NA	NA	NA	NA	NA
comp2196994_c1_seq1	24.9944	60.6462	61.5514	3.27553	10.7917	32.8816	46.2493	34.7753	NA	NA	NA	NA	NA
comp2197129_c0_seq1	13.8214	11.1832	13.7585	0.77079	1.02683	8.68067	21.1327	48.3485	ref|XP_011441088.1| PREDICTED: collagen alpha-4(VI) chain-like [Crassostrea gigas]	1e-11	32	48	9
comp2197309_c0_seq1	26.0924	43.7309	31.7678	12.0094	7.4463	33.6235	49.0979	32.5579	NA	NA	NA	NA	NA
comp2197313_c0_seq2	9.95574	10.6304	10.3895	48.3923	27.7046	5.80174	10.1379	12.1896	NA	NA	NA	NA	NA
comp2197328_c0_seq1	19.1391	11.2256	9.96699	0	6.08392	25.9568	14.4195	13.2824	NA	NA	NA	NA	NA
comp2197333_c0_seq1	20.641	36.7586	46.245	15.3176	10.2685	36.857	29.4643	25.9804	ref|XP_013404375.1| PREDICTED: uncharacterized protein LOC106169459 [Lingula anatina]	5e-09	26	47	1
comp2197345_c0_seq1	5.01191	5.0505	7.87759	23.0897	22.0872	7.44884	4.26135	5.05784	NA	NA	NA	NA	NA
comp2197371_c0_seq1	1.70597	1.75923	3.35517	190.884	87.1717	2.18667	2.86306	0.637499	NA	NA	NA	NA	NA
comp2197443_c0_seq1	5.52299	1.1471	1.14389	6.06949	9.76506	4.17377	2.11042	2.81244	ref|XP_004829576.1| 60S ribosomal protein L18a, putative [Theileria equi] gb|AFZ79910.1| 60S ribosomal protein L18a, putative [Theileria equi strain WA]	9e-57	50	69	1
comp2197576_c0_seq1	37.3876	22.4202	24.3603	6.13361	11.4564	33.1022	33.4769	33.7203	ref|XP_012734723.1| PREDICTED: gastrula zinc finger protein XlCGF57.1-like [Fundulus heteroclitus]	3e-12	45	73	0
comp2197643_c0_seq1	1359.29	1158.47	1708.36	511.053	426.8	1250.77	1457.81	1280.17	ref|XP_008479537.1| PREDICTED: 60S acidic ribosomal protein P1 isoform X1 [Diaphorina citri] ref|XP_008479538.1| PREDICTED: 60S acidic ribosomal protein P1 isoform X2 [Diaphorina citri] gb|ABG81961.1|	4e-19	72	84	0
comp2197679_c0_seq1	162.071	157.723	125.816	74.8203	78.1772	165.243	147.797	133.978	NA	NA	NA	NA	NA
comp2197726_c1_seq1	6.81908	2.68958	124.761	26.2657	34.7784	5.6403	3.36972	12.3002	NA	NA	NA	NA	NA
comp2197780_c0_seq1	56.0531	50.2282	42.9304	11.8498	21.1374	50.7412	52.3055	44.2482	NA	NA	NA	NA	NA
comp2197782_c0_seq1	22.5839	29.3169	22.8803	11.7516	6.5167	28.177	19.6739	15.0853	NA	NA	NA	NA	NA
comp2197826_c0_seq1	90.7368	91.937	83.7948	900.158	287.105	79.1956	97.1703	88.1106	ref|XP_015255257.1| PREDICTED: solute carrier family 43 member 3-like [Cyprinodon variegatus] ref|XP_015255258.1| PREDICTED: solute carrier family 43 member 3-like [Cyprinodon variegatus] ref|XP_01525	2e-50	31	46	6
comp2198016_c0_seq1	48909.2	42913.7	40259.1	27672.1	20691	48271.5	46061.1	43376.5	gb|ABW23199.1| ribosomal protein rps3a [Eurythoe complanata]	2e-150	86	92	1
comp2198075_c0_seq1	26.7714	25.2322	24.0381	133.203	157.022	26.9304	18.206	21.5706	NA	NA	NA	NA	NA
comp2198297_c0_seq1	816.803	947.9	888.666	417.268	540.563	862.641	933.757	1027.3	ref|XP_001631366.1| predicted protein [Nematostella vectensis] gb|EDO39303.1| predicted protein [Nematostella vectensis]	1e-93	69	82	1
comp2198297_c1_seq1	65.0569	78.6483	85.2009	36.1264	53.3526	66.1829	87.1773	90.6382	NA	NA	NA	NA	NA
comp2198383_c0_seq1	154.329	85.8921	74.1844	50.1302	65.5658	129.883	84.3865	59.5245	NA	NA	NA	NA	NA
comp2198403_c0_seq2	59.4334	183.474	167.666	8.38186	20.2012	67.5406	166.953	198.299	ref|XP_009014877.1| hypothetical protein HELRODRAFT_98742 [Helobdella robusta] gb|ESO06781.1| hypothetical protein HELRODRAFT_98742 [Helobdella robusta]	9e-28	37	53	4
comp2198530_c0_seq1	23.8578	33.7074	38.8301	103.307	139.362	29.052	38.6384	25.2349	NA	NA	NA	NA	NA
comp2198618_c0_seq2	14.91	18.7877	27.8603	1.25237	2.74494	13.988	11.6865	23.0494	NA	NA	NA	NA	NA
comp2198640_c0_seq1	12.1101	4.78855	4.80343	21.2275	39.4291	6.99872	3.16415	9.39061	NA	NA	NA	NA	NA
comp2198732_c0_seq2	52.8367	134.446	171.135	11.4637	29.3588	77.276	106.846	76.9086	gb|KOF99280.1| hypothetical protein OCBIM_22018198mg, partial [Octopus bimaculoides]	5e-39	41	56	6
comp2198785_c0_seq2	27.7476	32.5726	20.6218	75.3032	61.1979	16.8313	22.4067	21.974	NA	NA	NA	NA	NA
comp2198797_c0_seq2	18.4651	65.7633	67.3542	0	0.852361	10.2898	40.7259	34.6025	NA	NA	NA	NA	NA
comp2198805_c0_seq1	21.2315	73.6842	100.41	22.7991	51.0771	23.3428	82.1833	66.7198	NA	NA	NA	NA	NA
comp2198857_c0_seq2	120.396	117.085	97.8881	48.6461	49.3023	126.292	100.462	95.8528	ref|XP_005147037.1| PREDICTED: yae1 domain-containing protein 1 [Melopsittacus undulatus]	6e-09	30	49	13
comp2198934_c0_seq1	0.222665	1.28606	2.90489	4.17457	5.98651	4.02348	1.69642	1.43141	ref|XP_011677077.1| PREDICTED: RNA-directed DNA polymerase from mobile element jockey-like [Strongylocentrotus purpuratus]	3e-25	35	55	1
comp2199122_c0_seq1	16.1116	15.3492	19.8343	1.6057	2.65431	30.8831	8.83813	7.3128	ref|XP_013389647.1| PREDICTED: fatty acid-binding protein, intestinal-like [Lingula anatina]	1e-10	33	51	2
comp2199123_c0_seq1	126.433	170.662	152.07	59.2475	57.7813	127.25	173.066	132.915	NA	NA	NA	NA	NA
comp2199259_c0_seq2	221.824	171.328	167.599	66.212	70.5504	200.568	177.032	147.098	ref|XP_009060127.1| hypothetical protein LOTGIDRAFT_210048 [Lottia gigantea] ref|XP_011442934.1| PREDICTED: PHD finger-like domain-containing protein 5A [Crassostrea gigas] ref|XP_013077084.1| PREDICT	3e-71	100	100	0
comp2199263_c0_seq2	4167.15	1244.38	1465.17	662.848	380.169	2608.19	2054.77	2619.62	NA	NA	NA	NA	NA
comp2199445_c0_seq3	93.8888	124.694	127.839	63.1328	61.3217	86.2264	135.528	107.22	NA	NA	NA	NA	NA
comp2199471_c0_seq1	277.234	157.903	153.613	114.829	128.157	204.295	197.068	165.528	gb|AEI70679.1| microsomal GST 1 [Perinereis nuntia]	1e-63	67	81	3
comp2199649_c0_seq2	61.2133	272.986	250.819	15.3163	13.6845	61.1555	218.735	240.624	gb|ELT95802.1| hypothetical protein CAPTEDRAFT_153461 [Capitella teleta]	2e-06	48	58	0
comp2199752_c0_seq1	9.13697	25.3581	22.2909	46.1427	39.8724	9.99686	15.9511	15.1205	NA	NA	NA	NA	NA
comp2199795_c0_seq1	9.83385	10.9459	10.7232	29.608	29.5972	10.1759	14.8422	7.26309	NA	NA	NA	NA	NA
comp2199830_c0_seq1	48.0804	28.1487	25.2236	68.2352	58.3514	63.5963	36.3021	26.7516	NA	NA	NA	NA	NA
comp2199879_c0_seq1	17.1193	45.8093	29.7394	7.12817	6.08392	40.5815	70.8442	50.8341	ref|XP_009058764.1| hypothetical protein LOTGIDRAFT_217867 [Lottia gigantea] gb|ESO90437.1| hypothetical protein LOTGIDRAFT_217867 [Lottia gigantea]	4e-128	58	73	0
comp2199938_c0_seq1	148.195	221.91	212.821	132.331	102.188	138.065	198.411	205.773	ref|XP_013397806.1| PREDICTED: SH3 and PX domain-containing protein 2A-like isoform X1 [Lingula anatina]	2e-103	44	61	8
comp2200005_c0_seq2	5.92495	15.6065	12.2704	13.9056	24.3151	13.3452	17.6503	14.4099	NA	NA	NA	NA	NA
comp2200112_c1_seq1	30.4697	42.8475	54.6784	12.2973	8.3825	41.0417	47.7253	57.8495	ref|XP_011453859.1| PREDICTED: uncharacterized protein LOC105346835 [Crassostrea gigas] ref|XP_011453860.1| PREDICTED: uncharacterized protein LOC105346835 [Crassostrea gigas] ref|XP_011453861.1| PRED	6e-20	42	57	8
comp2200124_c0_seq1	129.411	175.012	154.647	638.702	366.887	129.771	196.798	176.633	gb|ELT94008.1| hypothetical protein CAPTEDRAFT_3325 [Capitella teleta]	2e-120	55	73	2
comp2200144_c0_seq1	111.353	54.0593	65.2467	47.556	47.2683	95.2012	65.1446	57.1339	NA	NA	NA	NA	NA
comp2200203_c0_seq1	32.8617	77.4843	75.1775	94.798	171.443	34.8729	50.3914	55.5484	NA	NA	NA	NA	NA
comp2200224_c0_seq2	44.2378	52.3306	47.3422	11.6574	27.2347	37.7123	45.8495	43.7757	NA	NA	NA	NA	NA
comp2200316_c0_seq1	257.349	354.044	295.776	2889.87	3967.02	314.442	414.215	283.812	ref|XP_013399808.1| PREDICTED: dual specificity protein phosphatase 14-like [Lingula anatina]	8e-55	52	72	0
comp2200361_c0_seq1	4851.87	6060.3	6183.04	10190.9	10776.2	6473.09	6296.6	6842	gb|ACI88787.1| FVRIamide neuropeptide precursor [Platynereis dumerilii]	0	90	90	7
comp2200386_c0_seq5	344.276	411.11	342.549	1649.45	1635.41	352.735	506.977	342.992	NA	NA	NA	NA	NA
comp2200430_c0_seq3	338.301	403.667	375.849	84.5527	109.802	446.869	293.3	305.15	ref|XP_011423249.1| PREDICTED: peroxisomal carnitine O-octanoyltransferase-like [Crassostrea gigas]	2e-136	42	62	1
comp2200465_c0_seq2	275.324	475.458	373.883	1596.58	1240.98	302.97	357.034	322.311	ref|WP_020534160.1| hypothetical protein [Lewinella cohaerens]	5e-75	52	60	6
comp2200669_c0_seq1	60.0352	50.1735	44.8062	12.9098	14.8926	54.0062	42.2313	42.9746	ref|XP_005987206.1| PREDICTED: uncharacterized protein C12orf43 homolog isoform X1 [Latimeria chalumnae]	3e-12	40	55	7
comp2200738_c0_seq1	84.1795	107.44	102.025	230.751	161.485	101.118	92.1797	110.105	ref|XP_009044025.1| hypothetical protein LOTGIDRAFT_152338 [Lottia gigantea] gb|ESP05480.1| hypothetical protein LOTGIDRAFT_152338 [Lottia gigantea]	1e-61	44	68	5
comp2200791_c0_seq1	846.765	1132.92	1109.54	294.19	399.817	907.943	1541.1	1339.11	NA	NA	NA	NA	NA
comp2200971_c0_seq1	49.88	62.4467	52.3402	20.7773	23.3857	48.6394	50.4262	55.1108	gb|ELT89301.1| hypothetical protein CAPTEDRAFT_127607 [Capitella teleta]	2e-145	67	81	2
comp2200976_c0_seq2	4.94651	4.40855	5.06703	45.5316	36.8354	6.10157	6.36299	5.94066	NA	NA	NA	NA	NA
comp2200987_c0_seq1	1.90145	0.901137	3.94475	12.1704	27.6108	4.77188	0.845299	1.09784	NA	NA	NA	NA	NA
comp2201214_c0_seq1	67.5311	76.4239	47.37	19.716	14.7313	46.1063	67.4198	66.3848	NA	NA	NA	NA	NA
comp2201252_c0_seq1	63.6109	29.7982	26.1021	1.66983	0.600649	27.3676	10.7633	49.2983	NA	NA	NA	NA	NA
comp2201258_c0_seq1	9.26154	14.2294	15.622	150.477	111.909	12.3969	10.5056	11.0199	NA	NA	NA	NA	NA
comp2201565_c0_seq1	10.5338	11.507	8.67765	40.5601	42.8184	13.5357	11.7591	9.02673	NA	NA	NA	NA	NA
comp2201579_c0_seq1	36.0631	34.4185	44.3485	8.38186	11.2885	45.3121	32.4808	28.1912	NA	NA	NA	NA	NA
comp2201594_c0_seq1	34.8281	30.0281	32.7111	312.46	208.712	52.5837	40.4042	35.0744	NA	NA	NA	NA	NA
comp2201620_c0_seq2	11.8529	39.2078	33.9283	3.62887	7.4463	15.4368	37.9926	59.7452	ref|XP_013388248.1| PREDICTED: UDP-glucuronosyltransferase 2B10-like [Lingula anatina]	8e-45	48	62	3
comp2201755_c0_seq1	22.1019	41.3372	59.8413	5.39553	9.40274	30.3189	38.5023	25.9706	gb|AIZ77503.1| enteropeptidase [Platynereis dumerilii]	4e-26	40	59	4
comp2201786_c0_seq1	25397.2	19051.2	17747.5	15627	10522.4	24902.7	23587.8	21287	gb|ABZ04268.1| ribosomal protein rps19 [Lineus viridis]	5e-78	73	87	0
comp2201951_c0_seq1	29.6225	1.50775	0.571943	0	1.96982	4.65921	51.7691	2.22532	ref|XP_014679242.1| PREDICTED: uncharacterized protein LOC106819095 isoform X2 [Priapulus caudatus]	2e-100	51	67	6
comp2202050_c0_seq3	63.1018	110.93	97.1025	24.0515	25.1982	68.33	76.6508	51.1788	NA	NA	NA	NA	NA
comp2202102_c0_seq1	71.7763	136.666	136.272	60.6856	29.805	54.576	117.922	100.462	NA	NA	NA	NA	NA
comp2202216_c0_seq1	34.521	24.6948	26.8213	10.2113	6.43286	21.991	57.0382	28.5758	ref|XP_011446343.1| PREDICTED: ABC transporter G family member 22-like [Crassostrea gigas]	1e-32	40	60	3
comp2202265_c0_seq3	45.1842	30.7346	33.4289	12.0094	9.15762	30.4445	36.8347	19.4648	NA	NA	NA	NA	NA
comp2202284_c0_seq1	48.9315	70.2979	71.8379	30.5699	20.8793	47.0258	54.2766	38.1568	ref|XP_011419812.1| PREDICTED: cytochrome P450 3A19-like [Crassostrea gigas]	1e-17	34	56	6
comp2202319_c1_seq1	125.518	105.077	68.2929	16.4104	16.0739	70.4708	117.906	140.118	gb|ELU18497.1| hypothetical protein CAPTEDRAFT_219830 [Capitella teleta]	1e-08	31	46	11
comp2202353_c0_seq1	113.619	90.5599	73.9708	155.548	193.097	115.2	96.7594	84.4028	NA	NA	NA	NA	NA
comp2202419_c0_seq1	4.19215	1.02135	0.953238	0	0	2.43567	2.0322	2.65603	gb|AAG60328.1| heat shock protein 60 [Toxoplasma gondii]	3e-101	68	85	0
comp2202423_c0_seq2	53.816	64.1748	97.5155	12.0735	14.802	40.7629	71.7626	52.7794	NA	NA	NA	NA	NA
comp2202480_c0_seq2	68.5708	131.912	138.62	52.1193	54.4734	47.339	65.1355	63.1511	NA	NA	NA	NA	NA
comp2202638_c0_seq1	60.8753	82.4516	83.7329	75.4275	85.5066	44.3688	103.872	113.736	NA	NA	NA	NA	NA
comp2202652_c0_seq2	50.8421	71.8656	99.4474	1669.01	1209.76	38.3063	84.3135	169.987	ref|XP_011431272.1| PREDICTED: delta-aminolevulinic acid dehydratase-like [Crassostrea gigas] gb|EKC23601.1| Delta-aminolevulinic acid dehydratase [Crassostrea gigas]	6e-149	62	79	1
comp2202679_c0_seq1	52.6459	133.821	144.515	65.9883	23.8825	46.2441	87.3853	68.1829	ref|XP_011450682.1| PREDICTED: uncharacterized protein LOC105344585 [Crassostrea gigas]	1e-41	38	58	7
comp2202755_c0_seq1	6.308	10.5935	16.0699	0	4.71475	9.9211	10.1871	6.19784	NA	NA	NA	NA	NA
comp2202767_c0_seq1	13.9269	6.65598	4.88012	0.417457	1.80195	3.08255	6.64096	3.38177	ref|WP_019540530.1| hypothetical protein [Proteiniphilum acetatigenes]	6e-10	28	45	12
comp2203047_c0_seq1	25.1812	11.118	12.0463	37.6352	27.6605	25.4095	14.0952	11.607	gb|ELT98202.1| hypothetical protein CAPTEDRAFT_212409 [Capitella teleta]	2e-10	33	50	10
comp2203085_c0_seq1	94.0075	71.6851	71.7662	237.268	247.222	108.542	73.0414	88.8831	NA	NA	NA	NA	NA
comp2203146_c0_seq1	326.424	237.989	238.348	106.707	130.412	271.458	269.831	216.251	gb|ELU14299.1| hypothetical protein CAPTEDRAFT_228572 [Capitella teleta]	3e-23	31	53	5
comp2203727_c0_seq2	94.7841	144.117	153.588	143.724	77.5759	48.0257	139.063	165.868	ref|XP_001626280.1| predicted protein [Nematostella vectensis] gb|EDO34180.1| predicted protein [Nematostella vectensis]	5e-27	37	60	2
comp2203809_c0_seq1	20.4034	46.9459	42.9749	14.4801	2.47984	31.1712	46.1101	46.2767	ref|WP_020534160.1| hypothetical protein [Lewinella cohaerens]	1e-06	40	52	17
comp2204078_c0_seq2	186.076	318.156	279.058	80.7929	102.967	215.657	202.364	109.881	NA	NA	NA	NA	NA
comp2204144_c0_seq1	2324.74	6752.3	3132.1	1009.82	437.83	1634.06	6292.76	2474.04	ref|XP_001626907.1| predicted protein [Nematostella vectensis] gb|EDO34807.1| predicted protein, partial [Nematostella vectensis]	3e-41	37	57	6
comp2204288_c0_seq1	55.0981	90.7008	70.3145	3.21141	8.71146	41.5984	45.4385	35.4207	gb|ELU05671.1| hypothetical protein CAPTEDRAFT_229021 [Capitella teleta]	3e-10	38	64	0
comp2204337_c0_seq1	43.0593	65.527	73.0551	27.2302	35.0571	20.187	82.7999	99.2726	NA	NA	NA	NA	NA
comp2204348_c0_seq1	91.8799	55.0442	36.0991	43.7034	35.5532	81.2554	49.7953	49.4905	NA	NA	NA	NA	NA
comp2204442_c0_seq1	547.583	836.594	758.857	599.909	1201.91	215.716	972.593	969.351	NA	NA	NA	NA	NA
comp2204490_c0_seq1	23.2642	19.3116	26.4691	2.37649	6.15438	17.2143	17.3289	30.6217	gb|ELU17948.1| hypothetical protein CAPTEDRAFT_202370 [Capitella teleta]	4e-13	30	47	8
comp2204510_c0_seq1	44.9338	210.504	97.8534	16.8906	14.292	82.786	199.664	232.151	NA	NA	NA	NA	NA
comp2204566_c0_seq1	16.0297	23.643	16.3269	41.7444	62.9789	21.8608	22.5224	15.2424	NA	NA	NA	NA	NA
comp2204672_c0_seq1	184.391	183.519	155.052	114.216	76.2782	186.32	148.544	145.504	ref|XP_013383370.1| PREDICTED: neudesin-like [Lingula anatina]	2e-44	66	83	2
comp2204897_c0_seq1	187.776	290.126	282.999	94.2811	140.845	230.761	292.044	275.303	ref|XP_011432584.1| PREDICTED: serine--pyruvate aminotransferase-like [Crassostrea gigas]	2e-155	65	79	0
comp2204930_c0_seq2	95.3225	98.0005	110.751	43.0622	38.1675	61.108	107.097	132.587	ref|XP_013400835.1| PREDICTED: uncharacterized protein LOC106166732 [Lingula anatina]	2e-50	40	60	3
comp2204995_c0_seq1	16.212	26.5742	18.0996	62.3267	52.9258	19.5866	30.3762	25.6465	NA	NA	NA	NA	NA
comp2205034_c0_seq1	224.719	165.61	109.676	4.94536	20.9129	225.939	129.329	109.693	NA	NA	NA	NA	NA
comp2205109_c0_seq1	2523.78	2031.33	2124.67	1762.93	1202.15	3121.43	1832.43	2036.93	NA	NA	NA	NA	NA
comp2205122_c0_seq1	16.8783	13.3025	15.144	56.833	42.1401	20.4734	16.4459	19.1526	gb|KOF92131.1| hypothetical protein OCBIM_22007169mg [Octopus bimaculoides]	2e-08	48	70	0
comp2205171_c0_seq1	20.1863	18.2724	28.6425	0.417457	7.53693	12.3341	19.8823	25.1503	NA	NA	NA	NA	NA
comp2205302_c0_seq1	74.5354	90.4878	86.3715	2090.13	1493.01	88.9705	131.779	130.735	ref|XP_014777555.1| PREDICTED: failed axon connections homolog [Octopus bimaculoides] gb|KOF81206.1| hypothetical protein OCBIM_22026854mg [Octopus bimaculoides]	6e-98	55	77	0
comp2205419_c0_seq2	1573.24	1973.93	2149.32	4472.21	10789.8	2022.55	2196.35	2230.54	ref|XP_012943766.1| PREDICTED: glutamine synthetase-like [Aplysia californica]	0	74	85	0
comp2205489_c0_seq1	12.32	13.7916	13.5126	2.08729	0.852361	9.79244	13.7654	4.56853	NA	NA	NA	NA	NA
comp2205583_c0_seq1	17.2531	46.657	38.5491	9.44185	14.369	16.2412	63.3116	94.7447	ref|XP_013400786.1| PREDICTED: mammalian ependymin-related protein 1-like [Lingula anatina]	4e-09	26	45	18
comp2205644_c0_seq1	10.7982	20.3618	15.3575	37.9572	39.0905	14.9581	11.8777	8.00135	NA	NA	NA	NA	NA
comp2205761_c0_seq1	27.8321	40.9952	50.7282	11.5291	15.0671	23.6295	44.8798	42.4237	NA	NA	NA	NA	NA
comp2205930_c0_seq2	15.7229	25.6789	41.522	1.6057	2.82218	24.6055	20.1197	36.9213	NA	NA	NA	NA	NA
comp2206043_c0_seq1	32.3791	12.703	10.8693	0.417457	1.02683	32.776	14.4283	13.3885	NA	NA	NA	NA	NA
comp2206056_c0_seq1	26.121	26.6468	16.4604	14.2563	5.55373	23.5743	15.8265	22.4956	gb|KFB51772.1| AGAP007547-PA-like protein [Anopheles sinensis]	7e-34	50	68	1
comp2206082_c0_seq1	6.33306	7.17926	9.88014	29.9614	46.7414	4.54861	5.56106	4.91922	NA	NA	NA	NA	NA
comp2206215_c0_seq2	14.1367	56.2986	38.5602	9.02308	11.2249	14.0654	39.3334	26.3911	ref|XP_013420392.1| PREDICTED: RNA-directed DNA polymerase from mobile element jockey-like [Lingula anatina]	1e-10	39	54	3
comp2206651_c1_seq1	25.1201	38.9703	39.7374	6.13361	8.89931	41.2817	26.8707	19.6545	NA	NA	NA	NA	NA
comp2206658_c0_seq1	171.53	181.127	176.611	447.702	334.703	182.025	194.309	162.328	ref|XP_011419041.1| PREDICTED: ankyrin repeat domain-containing protein 53-like [Crassostrea gigas] gb|EKC22251.1| Ankyrin repeat domain-containing protein 53 [Crassostrea gigas]	8e-106	43	56	15
comp2206709_c0_seq1	51.7318	41.0848	37.7913	8.18948	11.6377	38.9019	28.7638	29.8551	ref|XP_001635704.1| predicted protein [Nematostella vectensis] gb|EDO43641.1| predicted protein, partial [Nematostella vectensis]	1e-12	36	68	0
comp2206722_c0_seq1	24.3201	16.4421	24.893	11.0449	6.42607	8.1166	16.2954	15.0873	gb|ELU09061.1| hypothetical protein CAPTEDRAFT_121679 [Capitella teleta]	3e-50	37	57	3
comp2206764_c0_seq1	174.157	85.4998	87.4795	2103.9	1113.87	57.7183	51.2139	87.5707	gb|ELU07230.1| hypothetical protein CAPTEDRAFT_220385 [Capitella teleta]	2e-41	34	53	9
comp2206896_c0_seq1	2.35645	1.68206	1.24416	50.0634	39.8591	0.421111	1.37508	0.607861	NA	NA	NA	NA	NA
comp2206928_c0_seq1	246.741	485.631	448.337	1329.62	772.26	298.314	405.794	468.575	ref|XP_009053814.1| hypothetical protein LOTGIDRAFT_116948, partial [Lottia gigantea] gb|ESO95297.1| hypothetical protein LOTGIDRAFT_116948, partial [Lottia gigantea]	8e-12	33	50	1
comp2207063_c0_seq1	839.259	744.339	821.095	487.329	339.975	879.876	688.468	658.029	ref|XP_002591273.1| hypothetical protein BRAFLDRAFT_216507 [Branchiostoma floridae] gb|EEN47284.1| hypothetical protein BRAFLDRAFT_216507 [Branchiostoma floridae]	4e-66	77	90	0
comp2207078_c0_seq1	16.2974	9.62351	10.6884	2.02316	4.36582	13.6242	17.2623	11.8553	NA	NA	NA	NA	NA
comp2207142_c0_seq1	108.043	67.3526	71.3776	21.0665	38.9564	82.847	90.1128	62.9962	NA	NA	NA	NA	NA
comp2207229_c0_seq1	15.0499	14.8117	25.1619	2.85808	5.14093	8.04159	10.9659	11.2149	NA	NA	NA	NA	NA
comp2207383_c0_seq1	2.48618	1.03734	0.904088	25.7514	80.3194	0.85901	2.6807	0	NA	NA	NA	NA	NA
comp2207445_c0_seq1	23.2104	34.1126	44.7362	0	3.24836	12.136	31.7717	31.059	NA	NA	NA	NA	NA
comp2207487_c0_seq1	145.562	162.053	169.941	76.0386	48.0032	151.055	177.403	177.396	gb|ELT95255.1| hypothetical protein CAPTEDRAFT_182248 [Capitella teleta]	9e-101	59	79	0
comp2207522_c0_seq2	16.2093	7.61277	7.52384	2.31237	3.93964	15.3389	10.0482	8.21275	NA	NA	NA	NA	NA
comp2207642_c0_seq1	11.0318	34.8026	23.7661	1.95904	1.45301	8.10969	29.2156	14.5795	NA	NA	NA	NA	NA
comp2207651_c1_seq2	10.2499	32.6458	24.9435	1.6057	7.43292	17.1876	25.5822	17.7338	NA	NA	NA	NA	NA
comp2207766_c0_seq1	142.141	52.7423	35.6977	253.231	115.717	83.9654	66.0157	74.6288	NA	NA	NA	NA	NA
comp2207785_c0_seq1	154.113	255.591	300.081	118.238	134.329	123.167	253.809	244.292	emb|CAM91769.1| hypothetical protein [Platynereis dumerilii]	2e-30	56	64	1
comp2207922_c0_seq1	14.9136	8.35404	10.1693	72.4137	120.18	17.4175	16.0928	13.5663	NA	NA	NA	NA	NA
comp2208148_c0_seq1	1.53457	4.05619	0.190648	35.1579	10.5336	1.43168	2.30721	0.971068	ref|XP_013404629.1| PREDICTED: uncharacterized protein LOC106169643 [Lingula anatina]	7e-16	33	49	10
comp2208320_c0_seq1	8.08629	17.8383	23.1236	2.50474	4.97306	11.4416	16.1478	16.5862	NA	NA	NA	NA	NA
comp2208456_c0_seq1	58.9305	110.633	111.915	45.2136	46.8658	79.6255	86.9049	73.591	NA	NA	NA	NA	NA
comp2208457_c0_seq1	139.868	123.288	93.3139	33.0445	70.416	114.312	122.318	93.2968	NA	NA	NA	NA	NA
comp2208522_c0_seq1	1553.02	1509.65	1483.74	2455.81	2556.29	1824.27	1461.98	1464.04	NA	NA	NA	NA	NA
comp2208590_c0_seq1	55.9805	37.4877	39.9738	17.4691	17.9799	58.4555	39.2173	45.6227	gb|ELU15360.1| hypothetical protein CAPTEDRAFT_199433 [Capitella teleta]	3e-11	42	65	0
comp2208704_c0_seq1	1813.26	2351.2	2221.74	1243.67	1314.7	2246.77	2158.38	2295.67	ref|XP_013076675.1| PREDICTED: uncharacterized protein LOC106062903 [Biomphalaria glabrata]	2e-69	31	49	6
comp2208706_c0_seq1	59.8568	57.0741	46.0864	18.2726	21.1374	67.2312	53.446	43.725	NA	NA	NA	NA	NA
comp2208707_c0_seq1	380.035	360.646	359.182	173.883	192.863	384.822	396.353	346.856	ref|XP_007883320.1| PREDICTED: WD repeat-containing protein 74 [Callorhinchus milii]	4e-101	48	64	5
comp2208715_c0_seq1	67.5045	78.7006	92.2496	41.9995	29.9395	83.984	88.5583	72.508	ref|XP_014668413.1| PREDICTED: phosphatidylinositol-glycan biosynthesis class X protein-like [Priapulus caudatus] ref|XP_014668415.1| PREDICTED: phosphatidylinositol-glycan biosynthesis class X protei	3e-27	34	53	4
comp2208773_c0_seq1	10.1354	1.24856	2.86765	12.525	54.8727	6.82049	4.16869	1.9125	NA	NA	NA	NA	NA
comp2208901_c0_seq1	121.244	190.832	195.477	48.9707	95.1306	62.8708	137.415	158.722	NA	NA	NA	NA	NA
comp2208935_c0_seq2	12.8575	24.6607	29.8291	57.1301	50.4427	20.9867	22.8292	14.6085	NA	NA	NA	NA	NA
comp2208952_c0_seq1	182.912	153.534	135.482	32.5944	49.8054	187.424	136.064	134.005	ref|XP_013403504.1| PREDICTED: KRR1 small subunit processome component homolog [Lingula anatina]	1e-152	74	89	0
comp2208996_c0_seq1	128.531	125.614	103.028	75.0741	54.6744	120.503	102.398	103.703	gb|KOF72740.1| hypothetical protein OCBIM_22038997mg [Octopus bimaculoides]	8e-35	52	73	1
comp2209056_c0_seq1	6.00731	1.68976	0.929652	2165.01	1064.64	0.572673	0.321343	0.333568	NA	NA	NA	NA	NA
comp2209302_c0_seq2	3.96602	5.42005	6.51352	0	1.02683	4.30243	4.32497	5.3417	gb|AAI71481.1| Si:ch211-282j17.1 [Danio rerio]	1e-06	25	41	11
comp2209411_c0_seq2	36.61	159.414	160.593	48.073	60.6008	37.6216	121.238	137.523	gb|KOX73556.1| Spectrin beta chain [Melipona quadrifasciata]	1e-30	26	35	38
comp2209412_c0_seq1	27.281	40.052	30.3583	1.66983	5.3154	20.6974	15.1664	19.1658	ref|XP_001639543.1| predicted protein [Nematostella vectensis] gb|EDO47480.1| predicted protein [Nematostella vectensis]	2e-32	34	51	12
comp2209469_c0_seq1	126.076	265.239	206.862	95.1841	90.4657	137.454	171.44	179.863	NA	NA	NA	NA	NA
comp2209542_c0_seq2	188.845	221.43	170.689	953.942	959.798	159.382	199.176	137.79	NA	NA	NA	NA	NA
comp2209791_c0_seq1	7.30163	2.83685	3.57139	11.7542	38.3187	6.14662	1.53431	4.50925	NA	NA	NA	NA	NA
comp2209889_c0_seq4	106.083	98.9337	108.338	633.245	337.869	86.5924	124.099	169.45	ref|XP_013418477.1| PREDICTED: sulfotransferase 1C4-like [Lingula anatina]	1e-56	40	55	3
comp2209959_c0_seq1	383.879	434.936	348.873	204.231	172.66	338.896	338.241	238.083	NA	NA	NA	NA	NA
comp2210130_c0_seq1	9.06508	8.84537	7.14629	22.5126	35.5837	13.0863	8.28523	6.1771	NA	NA	NA	NA	NA
comp2210246_c0_seq1	29.6166	21.9028	40.9565	0.834915	5.83221	14.3693	22.2302	33.125	NA	NA	NA	NA	NA
comp2210374_c0_seq1	48.8345	43.8822	35.9568	9.85799	6.93628	13.3562	27.5102	50.0927	NA	NA	NA	NA	NA
comp2210376_c0_seq1	27.7014	19.7485	18.0491	55.0101	89.7878	37.2964	25.6083	16.5256	NA	NA	NA	NA	NA
comp2210398_c0_seq1	9.54713	5.06096	5.77253	217.384	200.625	6.72131	7.52381	9.8088	NA	NA	NA	NA	NA
comp2210440_c0_seq1_contamination	32.9613	9.19157	9.28088	39.3064	14.7113	13.688	13.1719	10.6959	gb|AAC04625.1| ribosomal protein S2 [Rattus norvegicus]	1e-142	100	100	0
comp2210547_c1_seq1	26.3606	11.134	7.87759	2.85808	7.11735	8.38976	25.3596	21.7428	NA	NA	NA	NA	NA
comp2210888_c0_seq1	15.117	6.3052	9.68995	35.1004	25.4394	11.6407	9.50402	12.1616	ref|XP_011429056.1| PREDICTED: calmodulin-A-like isoform X2 [Crassostrea gigas]	8e-59	62	82	0
comp2210994_c2_seq1	9.59367	16.1645	23.046	2.02316	3.17112	10.0854	10.3088	12.7773	ref|XP_013790827.1| PREDICTED: uncharacterized protein LOC106474682 [Limulus polyphemus]	5e-14	30	50	16
comp2211011_c0_seq1	21.0402	94.9774	96.5457	84.0278	76.1949	21.0866	74.3137	18.6166	ref|XP_013406197.1| PREDICTED: multiple inositol polyphosphate phosphatase 1-like [Lingula anatina]	7e-60	30	52	3
comp2211270_c0_seq1	289.592	363.947	398.949	141.356	148.658	292.024	266.679	212.669	gb|ELT98134.1| hypothetical protein CAPTEDRAFT_225969 [Capitella teleta]	9e-82	61	78	1
comp2211421_c0_seq1	12.4718	10.358	7.47666	64.2268	40.0735	13.5504	10.659	13.0207	NA	NA	NA	NA	NA
comp2211652_c0_seq1	2.61111	6.31411	3.40807	1042.56	93.7355	10.4214	2.56779	3.58034	ref|XP_010039663.1| PREDICTED: protein TAR1-like, partial [Eucalyptus grandis]	2e-08	33	46	7
comp2211765_c0_seq1	219.324	200.372	173.437	126.232	124.792	204.411	205.35	221.391	ref|XP_015109288.1| PREDICTED: 39S ribosomal protein L40, mitochondrial [Diachasma alloeum]	5e-51	47	66	0
comp2211803_c0_seq1	180.315	272.342	347.542	110.11	84.2007	162.473	257.346	231.426	NA	NA	NA	NA	NA
comp2211906_c0_seq1	24.8356	14.0563	11.8261	2.79395	5.97991	20.0327	14.7062	9.76566	NA	NA	NA	NA	NA
comp2212006_c0_seq1	0	0.577397	0	9.5701	20.5568	0.151562	1.28537	0	NA	NA	NA	NA	NA
comp2212134_c0_seq1	2.81449	0.775395	0.96117	0	0	2.00106	0.917702	0.460344	emb|CEM16186.1| unnamed protein product [Vitrella brassicaformis CCMP3155]	2e-105	81	90	0
comp2212156_c1_seq1	29.8664	26.8586	16.836	11.3983	10.3591	24.9507	23.5704	25.7331	NA	NA	NA	NA	NA
comp2212186_c0_seq1	9.75716	1.79675	5.15365	6.77615	29.9162	7.21084	3.89949	4.16746	NA	NA	NA	NA	NA
comp2212419_c0_seq1	8.20252	25.0072	25.0737	6.22913	5.21139	19.3722	18.1917	14.2542	NA	NA	NA	NA	NA
comp2212642_c0_seq1	9.59812	11.6727	10.8435	0.417457	0	5.15076	7.4428	12.4988	ref|XP_005760864.1| hypothetical protein EMIHUDRAFT_217630 [Emiliania huxleyi CCMP1516] gb|EOD08435.1| hypothetical protein EMIHUDRAFT_217630 [Emiliania huxleyi CCMP1516]	7e-06	32	48	18
comp2212838_c1_seq1	33.9453	42.2587	53.7812	2.02316	3.68114	72.348	38.6154	30.5707	NA	NA	NA	NA	NA
comp2212973_c0_seq1	848.532	976.351	1080.36	325.081	159.28	1161.42	629.998	421.748	gb|ELU12787.1| hypothetical protein CAPTEDRAFT_187766 [Capitella teleta]	2e-45	39	58	2
comp2213012_c1_seq1	4.13297	2.30465	2.11673	110.875	67.0197	2.29069	2.9499	3.88065	gb|ELU04260.1| hypothetical protein CAPTEDRAFT_194549 [Capitella teleta]	4e-13	55	74	0
comp2213433_c0_seq1	388.539	498.533	449.372	316.737	288.626	489.409	508.688	385.503	NA	NA	NA	NA	NA
comp2213506_c0_seq1	359.109	333.292	293.58	53.6883	101.386	366.398	325.082	249.48	NA	NA	NA	NA	NA
comp2213512_c0_seq1	122.813	220.898	237.259	399.811	342.314	107.181	218.499	216.813	gb|ELU17602.1| hypothetical protein CAPTEDRAFT_178842 [Capitella teleta]	2e-142	55	75	1
comp2213838_c1_seq1	7.12847	1.89821	3.47904	21.7091	54.8721	2.61799	6.05042	1.09784	NA	NA	NA	NA	NA
comp2213991_c0_seq1	11.8395	16.265	13.668	1.6057	3.5973	5.14263	15.4126	12.6456	NA	NA	NA	NA	NA
comp2214009_c0_seq1	157.306	98.7724	102.256	67.9159	81.7347	170.742	98.9515	125.455	NA	NA	NA	NA	NA
comp2214119_c0_seq1	201.158	249.019	251.175	114.698	81.8658	232.167	236.155	207.33	ref|XP_013399318.1| PREDICTED: ribonuclease H1-like [Lingula anatina]	2e-62	43	59	3
comp2214176_c0_seq1	183.653	154.73	149.767	29.2848	39.1441	169.634	221.596	209.898	NA	NA	NA	NA	NA
comp2214237_c0_seq1	62.3017	225.585	213.397	27.3257	22.1776	40.7733	211.452	238.786	gb|AAB91461.1| receptor tyrosine phosphatase [Hirudo medicinalis]	1e-39	39	60	5
comp2214238_c0_seq1	21.1283	23.4293	22.2942	3.27553	10.1978	15.495	22.6671	29.5647	NA	NA	NA	NA	NA
comp2214330_c0_seq1	3.25947	10.786	10.0966	11.8825	16.5333	8.29844	10.9311	7.2364	NA	NA	NA	NA	NA
comp2214452_c0_seq1	90.6511	66.7696	73.0978	124.17	144.412	98.7505	69.5358	60.4821	ref|XP_009063161.1| hypothetical protein LOTGIDRAFT_129679 [Lottia gigantea] gb|ESO86203.1| hypothetical protein LOTGIDRAFT_129679 [Lottia gigantea]	4e-54	40	57	4
comp2214496_c0_seq1	71.6871	71.4429	68.2446	32.3679	34.8289	41.7784	61.9336	91.5576	NA	NA	NA	NA	NA
comp2214509_c0_seq1	12.4332	15.5949	10.4091	37.185	33.634	17.4633	14.3617	16.0659	NA	NA	NA	NA	NA
comp2214511_c0_seq1	72.0087	55.1361	61.6193	27.6777	36.7281	69.3526	70.2566	57.4	NA	NA	NA	NA	NA
comp2214646_c0_seq1	17.3215	31.8408	41.4226	10.8866	1.70472	33.2931	31.9192	29.5832	NA	NA	NA	NA	NA
comp2214874_c0_seq1	7.97923	1.2999	5.20457	67.6031	123.044	0.85901	7.94659	8.74059	NA	NA	NA	NA	NA
comp2214888_c0_seq1	402.609	753.287	813.794	407.707	204.08	509.563	708.522	637.842	ref|XP_003457632.1| PREDICTED: selenium-binding protein 1 [Oreochromis niloticus]	0	67	80	1
comp2214900_c0_seq1	17.3489	9.83257	5.12785	0	0.42618	8.90235	12.6797	7.58709	NA	NA	NA	NA	NA
comp2215197_c0_seq1	268.58	241.263	143.972	32.1128	82.9965	89.8445	175.729	155.543	NA	NA	NA	NA	NA
comp2215664_c0_seq1	77.648	91.1736	94.7956	235.126	231.143	102.852	83.0634	89.6415	NA	NA	NA	NA	NA
comp2215664_c1_seq1	52.4241	55.3165	50.2109	175.433	215.192	95.1131	52.2964	55.7588	NA	NA	NA	NA	NA
comp2215885_c0_seq1	1.1677	1.51327	1.42688	886.349	1482	0.437899	1.80933	0.303931	NA	NA	NA	NA	NA
comp2216126_c0_seq1	244.21	269.664	245.01	82.3358	77.8152	184.948	229.76	249.226	gb|ERE72602.1| MOSC domain-containing protein 2 [Cricetulus griseus]	1e-27	37	60	4
comp2216167_c0_seq4	963.318	1359.96	1375.64	3263.29	2976.49	990.227	1321.87	1343.18	gb|ELU11325.1| hypothetical protein CAPTEDRAFT_226868 [Capitella teleta]	6e-160	55	75	8
comp2216604_c0_seq2	68.8973	4.40915	6.11063	35.0938	17.8188	16.9504	5.86215	9.83021	ref|WP_050469919.1| DNA-directed RNA polymerase subunit alpha [Herbaspirillum chlorophenolicum]	3e-97	85	92	0
comp2216701_c0_seq3	18.522	18.0396	13.4438	60.0536	46.8992	13.911	9.16529	10.8428	ref|XP_013095217.1| PREDICTED: kelch-like protein 15 [Biomphalaria glabrata] ref|XP_013095218.1| PREDICTED: kelch-like protein 15 [Biomphalaria glabrata]	1e-14	28	47	9
comp2216809_c0_seq2	85.0588	77.1852	71.1091	4.33553	11.7283	72.2735	64.3571	72.2021	ref|XP_003218759.1| PREDICTED: gamma-glutamylaminecyclotransferase isoform X2 [Anolis carolinensis] ref|XP_008105173.1| PREDICTED: gamma-glutamylaminecyclotransferase isoform X2 [Anolis carolinensis]	2e-25	37	62	4
comp2216816_c0_seq1	49.0956	72.4833	74.0921	221.132	192.423	10.8984	98.8266	61.5955	ref|XP_011420854.1| PREDICTED: uncharacterized protein LOC105323477 [Crassostrea gigas] ref|XP_011423513.1| PREDICTED: uncharacterized protein LOC105325578 [Crassostrea gigas] gb|EKC31126.1| hypotheti	1e-09	48	65	2
comp2216905_c0_seq1	102.376	120.024	108.803	40.5234	26.245	159.61	91.9827	98.0575	gb|ELT92962.1| hypothetical protein CAPTEDRAFT_224953 [Capitella teleta]	1e-32	33	47	21
comp2217068_c0_seq1	137.706	283.741	348.049	402.337	341.744	121.937	262.313	289.215	ref|XP_009056655.1| hypothetical protein LOTGIDRAFT_190456 [Lottia gigantea] gb|ESO92510.1| hypothetical protein LOTGIDRAFT_190456 [Lottia gigantea]	2e-52	54	66	2
comp2217261_c0_seq1	9.21366	17.8742	16.5277	25.3065	25.8254	14.7289	16.9817	14.0296	NA	NA	NA	NA	NA
comp2217273_c0_seq1	688.465	885.695	852.603	454.462	285.623	858.79	898.013	905.615	ref|XP_013420437.1| PREDICTED: nuclear pore complex protein Nup107-like [Lingula anatina]	0	50	69	5
comp2217426_c0_seq1	36.7206	9.93776	15.773	35.3569	79.0271	16.0189	22.0709	19.3262	NA	NA	NA	NA	NA
comp2217620_c0_seq2	5.15167	16.0847	6.16551	468.752	90.0709	3.59828	43.6525	25.3255	ref|XP_013399145.1| PREDICTED: uncharacterized protein LOC106165487 [Lingula anatina]	2e-09	30	48	12
comp2217628_c0_seq3	14.8295	9.61064	12.0467	2.44062	0.600649	4.8657	14.5961	7.84065	NA	NA	NA	NA	NA
comp2217632_c0_seq1	7.07987	11.7461	7.98115	0.834915	0.600649	9.54499	9.50107	5.9703	NA	NA	NA	NA	NA
comp2217785_c0_seq3	30.0445	73.7261	110.875	8.02721	8.56376	39.2083	57.7562	100.739	ref|XP_013396514.1| PREDICTED: sushi, von Willebrand factor type A, EGF and pentraxin domain-containing protein 1-like [Lingula anatina]	4e-102	42	60	2
comp2217812_c0_seq1	2034.92	4755.67	3413.76	2297.63	2186.71	1407.3	5540.3	6675.74	ref|NP_001268725.1| early growth response protein 1-like [Aplysia californica] gb|AGH32758.1| Egr transcription factor-like protein [Aplysia californica]	8e-82	41	50	18
comp2217905_c0_seq1	65354	52357.8	48881.4	39878	30149.5	63363.5	59608.7	53247.6	ref|NP_001037263.1| ribosomal protein S8 [Bombyx mori] gb|AAV34864.1| ribosomal protein S8 [Bombyx mori]	1e-120	79	92	0
comp2218022_c0_seq1	17.9973	11.2659	15.4742	4.68755	2.22813	19.6804	13.7161	14.1274	NA	NA	NA	NA	NA
comp2218087_c0_seq1	412.795	316.988	323.747	657.362	370.315	605.852	258.19	208.794	ref|XP_009062046.1| hypothetical protein LOTGIDRAFT_107053 [Lottia gigantea] gb|ESO87093.1| hypothetical protein LOTGIDRAFT_107053 [Lottia gigantea]	5e-62	50	72	2
comp2218105_c0_seq4	358.503	513.103	546.34	245.078	287.003	447.383	447.061	476.332	ref|XP_013413316.1| PREDICTED: delta-1-pyrroline-5-carboxylate synthase-like isoform X1 [Lingula anatina]	0	65	80	2
comp2218374_c0_seq1	47.964	38.6453	42.6117	5.00949	15.849	23.2846	23.9179	16.7716	NA	NA	NA	NA	NA
comp2218413_c0_seq1	285.912	478.299	560.793	208.827	241.975	356.896	388.395	398.099	gb|ELU18241.1| hypothetical protein CAPTEDRAFT_228673 [Capitella teleta]	5e-80	28	46	8
comp2218579_c0_seq1	7.11851	7.64139	10.9575	46.3076	28.0667	11.381	9.9614	8.70568	NA	NA	NA	NA	NA
comp2218605_c0_seq1	6.75467	8.03895	13.3925	30.7609	27.6473	8.51763	8.28228	15.1192	NA	NA	NA	NA	NA
comp2218632_c0_seq2	4.07203	0.227209	1.26775	0	0	1.52959	0.321343	0.333568	gb|AIZ77501.1| subtilisin-2 [Platynereis dumerilii]	4e-28	45	64	5
comp2218834_c0_seq1	50.2456	37.8632	39.1968	6.48694	15.8556	54.083	54.4154	50.8043	NA	NA	NA	NA	NA
comp2218843_c1_seq1	25.1586	26.3412	30.398	1.18825	2.05366	36.5662	35.608	17.1832	NA	NA	NA	NA	NA
comp2219075_c0_seq3	225.021	416.374	407.079	188.019	160.798	231.929	361.745	356.044	NA	NA	NA	NA	NA
comp2219092_c0_seq1	11.1365	3.144	6.09896	15.319	48.0201	14.1391	5.55238	4.23496	NA	NA	NA	NA	NA
comp2219123_c0_seq1	6.11563	25.0612	25.8508	13.6151	17.4629	7.78399	18.9704	11.152	NA	NA	NA	NA	NA
comp2219213_c0_seq1	4.5783	0.992143	0.381295	0	0	0.687367	1.8354	1.12748	NA	NA	NA	NA	NA
comp2219247_c0_seq1	10.7504	12.0324	8.14493	286.445	431.147	11.1803	16.4693	13.1445	NA	NA	NA	NA	NA
comp2219624_c0_seq2	15.817	13.6957	13.344	145.616	107.234	13.5209	13.5221	21.5337	NA	NA	NA	NA	NA
comp2219666_c0_seq1	17.217	5.91751	7.86173	6.35738	4.54028	5.02948	10.8675	9.68564	NA	NA	NA	NA	NA
comp2219685_c0_seq1	33.5936	46.5559	51.6904	16.0557	20.614	31.0539	38.0072	47.9623	ref|XP_008268542.1| PREDICTED: copper homeostasis protein cutC homolog isoform X1 [Oryctolagus cuniculus]	8e-98	56	72	0
comp2219762_c0_seq1	192.02	210.187	203.323	105.068	114.909	253.804	192.057	201.159	ref|XP_013417263.1| PREDICTED: protein FAM207A-like isoform X2 [Lingula anatina] ref|XP_013417265.1| PREDICTED: protein FAM207A-like isoform X2 [Lingula anatina] ref|XP_013417266.1| PREDICTED: protein	9e-13	43	62	10
comp2219827_c0_seq2	8.4211	5.32291	3.26657	51.4126	67.2814	4.61952	6.35151	7.36385	ref|XP_009054826.1| hypothetical protein LOTGIDRAFT_100384, partial [Lottia gigantea] gb|ESO94549.1| hypothetical protein LOTGIDRAFT_100384, partial [Lottia gigantea]	8e-07	50	65	0
comp2219955_c0_seq1	2688.72	6468.46	3760.27	1871.53	1053.46	2731.61	2519.98	4760.04	NA	NA	NA	NA	NA
comp2219958_c1_seq1	67.6871	30.5757	23.2219	2.79395	2.30537	6.15038	43.3766	40.7897	NA	NA	NA	NA	NA
comp2219984_c0_seq1	40.919	3.50524	23.8	297.6	148.284	6.70138	21.7002	39.8886	NA	NA	NA	NA	NA
comp2219987_c0_seq3	311.105	33.1185	140.941	27.9408	39.201	50.1937	114.203	101.324	NA	NA	NA	NA	NA
comp2220018_c0_seq1	1852.82	4573.58	3817.21	2434.94	1594.33	2460.95	5953.37	3107.57	gb|AFE61618.1| metallothionein [Perinereis nuntia]	2e-05	48	60	15
comp2220020_c1_seq1	1177.33	1217.29	1034.36	2907.59	1794.15	1349.6	1090.57	866.163	gb|ELT92794.1| hypothetical protein CAPTEDRAFT_163933 [Capitella teleta]	1e-45	60	77	2
comp2220033_c1_seq1	23.4185	56.7544	34.6431	3.62887	5.30861	27.4889	47.0483	53.5631	ref|XP_009028184.1| hypothetical protein HELRODRAFT_180640 [Helobdella robusta] gb|ESN93772.1| hypothetical protein HELRODRAFT_180640 [Helobdella robusta]	2e-16	40	56	0
comp2220039_c0_seq1	178.263	244.502	282.505	609.245	381.248	268.436	276.76	270.891	ref|XP_013772514.1| PREDICTED: THAP domain-containing protein 2-like [Limulus polyphemus]	4e-33	46	62	4
comp2220070_c0_seq2	77.1263	74.1088	76.2595	120.684	210.042	78.6032	69.2463	69.5526	NA	NA	NA	NA	NA
comp2220078_c0_seq1	39.5117	36.6134	47.5603	9.21677	9.75827	22.0603	37.9552	44.087	NA	NA	NA	NA	NA
comp2220138_c0_seq1	10.8412	16.0996	13.5458	1.25237	2.82218	17.3872	14.6163	13.0266	NA	NA	NA	NA	NA
comp2220201_c0_seq1	27.3998	18.2312	16.0267	44.2177	59.1203	25.394	39.669	18.9221	NA	NA	NA	NA	NA
comp2220297_c0_seq2	23.3047	28.7743	31.5418	6.9044	10.8691	28.0955	31.763	28.7893	NA	NA	NA	NA	NA
comp2220360_c0_seq1	55.2144	56.7908	40.6328	20.4567	17.6174	32.2406	52.1893	57.9677	NA	NA	NA	NA	NA
comp2220373_c0_seq1	15.5142	9.94883	16.0626	0	1.54364	3.50037	16.3127	18.7848	gb|ELU16351.1| hypothetical protein CAPTEDRAFT_213563 [Capitella teleta]	8e-104	63	82	0
comp2220394_c0_seq1	1516.27	1317.04	1112.98	297.301	253.051	1825.36	1645.21	1124.86	ref|XP_002741224.1| PREDICTED: NHP2-like protein 1-like [Saccoglossus kowalevskii]	4e-63	90	98	0
comp2220399_c0_seq1	9.86725	14.3275	15.9019	36.2873	33.9694	11.8771	19.2686	10.5299	NA	NA	NA	NA	NA
comp2220443_c0_seq2	56.0641	11.8614	2.26395	5.87711	2.74494	0.286337	12.2515	24.8213	NA	NA	NA	NA	NA
comp2220452_c1_seq1	238.713	571.261	486.505	36.4116	54.3317	223.323	537.719	560.084	ref|XP_009026365.1| hypothetical protein HELRODRAFT_102544 [Helobdella robusta] gb|ESN95495.1| hypothetical protein HELRODRAFT_102544 [Helobdella robusta]	7e-28	30	47	11
comp2220455_c0_seq1	6.82254	1.35555	0.71344	0.417457	0	3.15708	0.275015	3.93993	NA	NA	NA	NA	NA
comp2220459_c0_seq1	54.4997	49.2868	78.5808	1.54158	11.3927	27.5874	40.7285	60.1212	NA	NA	NA	NA	NA
comp2220490_c0_seq1	29.4218	22.4882	18.0251	5.94124	6.76162	28.6311	25.3969	21.5456	NA	NA	NA	NA	NA
comp2220544_c0_seq1	24.9882	25.3579	31.6897	107.131	144.271	40.1186	23.3764	30.0191	NA	NA	NA	NA	NA
comp2220563_c0_seq2	22.4679	8.89333	13.5518	127.285	41.1879	12.4302	19.9663	13.2327	gb|ELU15627.1| hypothetical protein CAPTEDRAFT_92948 [Capitella teleta]	3e-34	32	47	22
comp2220677_c0_seq1	152.968	450.126	236.763	2066.45	1718.48	107.473	361.752	358.968	NA	NA	NA	NA	NA
comp2220691_c0_seq1	82.9566	120.3	107.965	30.5097	24.8056	111.147	75.0182	66.0728	gb|EKC42246.1| Sphingolipid delta(4)-desaturase DES1 [Crassostrea gigas]	9e-136	63	77	1
comp2220727_c0_seq1	5.88195	1.46255	1.72376	0	0.42618	1.98757	1.46773	0.667137	ref|WP_013250475.1| putative phage terminase large subunit [Nitrospira defluvii] emb|CBK43655.1| putative Phage terminase, large subunit [Nitrospira defluvii]	4e-42	46	61	3
comp2220733_c0_seq1	50.24	22.8525	21.3646	34.4579	18.3154	9.17706	38.2823	45.4835	ref|XP_008027550.1| hypothetical protein SETTUDRAFT_154665 [Setosphaeria turcica Et28A] gb|EOA85067.1| hypothetical protein SETTUDRAFT_154665 [Setosphaeria turcica Et28A]	7e-05	30	44	14
comp2220774_c0_seq1	8.72095	0.687152	0.929652	0.417457	0.42618	1.3137	0.55003	0.637499	NA	NA	NA	NA	NA
comp2220966_c1_seq1	600.131	1086.95	1555.42	141.782	272.52	471.194	1265.55	839.391	ref|XP_014680008.1| PREDICTED: uncharacterized protein LOC106819957 [Priapulus caudatus]	1e-07	29	53	7
comp2221025_c0_seq1	18.9429	36.0561	39.4236	2.44062	5.90267	13.8347	48.2233	33.2228	NA	NA	NA	NA	NA
comp2221045_c0_seq2	4.62575	25.329	28.7149	0	3.15773	3.99601	11.6636	23.7166	NA	NA	NA	NA	NA
comp2221070_c0_seq3	476.383	805.177	743.782	312.758	211.755	639.247	716.634	679.957	ref|XP_013406007.1| PREDICTED: nuclear pore complex protein Nup155-like [Lingula anatina]	0	56	72	7
comp2221095_c0_seq1	248.716	1162.28	1143.09	80.7235	50.5467	211.691	751.186	924.191	NA	NA	NA	NA	NA
comp2221142_c0_seq1	1301.64	6434.09	5856.18	195.487	97.2277	1042.92	4403.59	3641.71	NA	NA	NA	NA	NA
comp2221179_c0_seq1	340.042	246.872	235.935	799.047	894.264	393.084	184.018	174.314	NA	NA	NA	NA	NA
comp2221211_c0_seq1	1163.57	1017.1	847.66	146.013	416.56	1022.6	958.027	1076.32	ref|XP_013382041.1| PREDICTED: guanine nucleotide-binding protein-like 3 homolog [Lingula anatina]	0	59	76	5
comp2221231_c0_seq2	228.506	177.011	175.654	371.462	354.377	287.054	214.901	180.664	ref|XP_011454679.1| PREDICTED: coiled-coil domain-containing protein 40-like [Crassostrea gigas]	0	69	84	0
comp2221273_c0_seq1	36.0922	26.2262	21.5991	121.064	110.449	34.917	17.1002	18.1141	ref|XP_013384676.1| PREDICTED: leucine-rich repeat-containing protein 72-like [Lingula anatina]	1e-79	49	70	1
comp2221300_c0_seq1	21.5864	21.089	23.7233	652.842	422.276	19.3944	36.3746	39.3521	gb|ELU15384.1| hypothetical protein CAPTEDRAFT_174334 [Capitella teleta]	1e-67	53	68	2
comp2221399_c0_seq1	12.8128	22.3529	28.8232	3.56474	9.49336	22.2127	22.5658	17.1414	NA	NA	NA	NA	NA
comp2221435_c0_seq3	784.482	1104.5	1646.26	106.709	271.205	587.106	1356.59	1603.02	NA	NA	NA	NA	NA
comp2221474_c0_seq1	797.804	691.85	659.428	1338.44	1484.01	947.468	551.713	518.836	gb|ELU04135.1| hypothetical protein CAPTEDRAFT_167723 [Capitella teleta]	3e-115	74	88	0
comp2221486_c0_seq1	3174.45	2006.94	1826.54	7719.73	8192.88	2665.19	3300.17	3161.42	NA	NA	NA	NA	NA
comp2221537_c0_seq1	37.502	42.019	45.6466	16.1853	21.0402	90.4245	26.8821	36.2535	NA	NA	NA	NA	NA
comp2221583_c0_seq2	13.5081	21.9299	23.4115	28.4525	47.0535	9.5417	24.1494	20.1711	NA	NA	NA	NA	NA
comp2221604_c0_seq1	142.362	105.293	104.629	232.907	232.916	150.756	103.366	86.6051	gb|ELU16999.1| hypothetical protein CAPTEDRAFT_157041 [Capitella teleta]	3e-59	86	92	0
comp2221605_c0_seq1	271.561	226.896	192.09	43.3213	95.9065	262.414	189.518	251.267	NA	NA	NA	NA	NA
comp2221608_c0_seq2	77.398	37.9108	25.9974	9.98624	12.5872	35.7316	41.5824	29.0747	NA	NA	NA	NA	NA
comp2221672_c0_seq1	9.57616	13.1039	18.0096	0.417457	0	11.9355	10.905	6.80637	NA	NA	NA	NA	NA
comp2221749_c0_seq2	222.964	356.848	385.884	363.408	387.333	333.012	294.87	366.501	NA	NA	NA	NA	NA
comp2221813_c0_seq2	772.616	857.393	765.983	288.341	408.412	455.397	679.522	874.377	NA	NA	NA	NA	NA
comp2221854_c0_seq1	710.055	747.956	834.695	310.551	376.818	857.708	691.688	864.536	ref|XP_011433484.1| PREDICTED: uncharacterized protein KIAA1328-like [Crassostrea gigas]	2e-16	28	49	20
comp2221859_c0_seq1	3.49217	3.96303	7.96421	80.8963	257.295	2.25382	4.0297	6.37137	NA	NA	NA	NA	NA
comp2221867_c0_seq1	55.8149	39.421	45.2003	14.0967	17.8759	44.306	39.3214	49.6519	NA	NA	NA	NA	NA
comp2221987_c0_seq1	4.81332	2.55337	3.93063	11.5291	52.0158	4.79855	2.35936	4.93996	NA	NA	NA	NA	NA
comp2222035_c0_seq2	117.628	82.7171	78.4059	45.9202	50.2649	110.455	101.316	63.5932	NA	NA	NA	NA	NA
comp2222124_c0_seq1	118.191	88.7746	93.0236	47.2642	32.8018	143.17	100.025	123.903	ref|XP_005287525.1| PREDICTED: putative hydrolase RBBP9 [Chrysemys picta bellii]	6e-66	61	77	0
comp2222175_c0_seq1	23.2476	19.1591	28.5836	55.4262	85.2006	11.9737	21.405	18.1681	gb|ELT90893.1| hypothetical protein CAPTEDRAFT_214558 [Capitella teleta]	3e-21	40	62	0
comp2222258_c0_seq1	226.433	273.363	283.166	756.605	629.429	275.983	284.579	221.556	ref|XP_013395048.1| PREDICTED: glucose-induced degradation protein 4 homolog [Lingula anatina] ref|XP_013401620.1| PREDICTED: glucose-induced degradation protein 4 homolog [Lingula anatina]	4e-130	88	96	0
comp2222284_c0_seq1	33.9036	71.9251	55.8781	16.9207	8.47313	45.0168	60.5557	70.9676	gb|AEI70677.1| GST-sigma [Perinereis nuntia]	6e-80	72	82	1
comp2222329_c0_seq1	7.9324	5.67586	7.66159	16.2167	44.2846	5.26875	6.66704	8.30461	ref|XP_011431686.1| PREDICTED: uncharacterized protein LOC105331269 [Crassostrea gigas]	2e-43	44	63	2
comp2222359_c0_seq1	21.9842	23.809	25.1108	3.91807	8.9127	25.6733	22.7164	24.5269	ref|XP_011445198.1| PREDICTED: uncharacterized protein LOC105340721 isoform X1 [Crassostrea gigas] ref|XP_011445199.1| PREDICTED: uncharacterized protein LOC105340721 isoform X2 [Crassostrea gigas]	3e-25	45	62	2
comp2222372_c0_seq1	51.0184	43.5181	42.937	26.2657	27.0335	42.7234	34.3538	38.5371	ref|XP_013096751.1| PREDICTED: methylthioribulose-1-phosphate dehydratase-like [Biomphalaria glabrata]	1e-107	66	81	0
comp2222392_c0_seq1	133.744	141.023	143.737	250.63	327.792	166.151	110.067	106.04	NA	NA	NA	NA	NA
comp2222438_c0_seq1	37.1848	26.7076	27.466	1.6057	6.94288	29.6804	22.8496	31.6375	ref|XP_013874262.1| PREDICTED: RNA-directed DNA polymerase from mobile element jockey-like [Austrofundulus limnaeus]	1e-12	53	70	2
comp2222565_c0_seq2	57.2	25.2709	28.2621	42.968	58.7512	38.1208	25.9239	30.2022	NA	NA	NA	NA	NA
comp2222669_c0_seq2	8.27173	1.71127	4.12151	13.3573	16.792	7.13631	1.71667	4.97849	NA	NA	NA	NA	NA
comp2222774_c0_seq1	664.061	1618.37	1784.58	575.207	518.796	748.424	1101.71	1012.76	NA	NA	NA	NA	NA
comp2222851_c0_seq1	193.405	270.192	269.252	175.325	88.8315	206.816	262.35	230.184	gb|ELU06398.1| hypothetical protein CAPTEDRAFT_173764 [Capitella teleta]	2e-137	58	73	1
comp2222975_c0_seq1	86.0574	9.27116	9.27295	40.5548	19.9695	24.5607	12.0949	14.4788	NA	NA	NA	NA	NA
comp2222988_c0_seq1	81.5164	82.6427	85.0121	35.6762	10.4429	104.591	77.6388	74.5101	ref|XP_003795093.1| PREDICTED: centromere protein P [Otolemur garnettii]	5e-09	24	48	7
comp2223036_c0_seq1	5.93011	3.55598	4.78778	22.8606	19.5804	4.40772	7.50356	3.64784	gb|ELU01845.1| hypothetical protein CAPTEDRAFT_191266 [Capitella teleta]	3e-33	36	60	3
comp2223102_c0_seq2	1097.96	1876.32	1902.6	870.695	913.593	1242.9	1866.04	2819.3	ref|XP_013392958.1| PREDICTED: fibroblast growth factor receptor-like 1 [Lingula anatina] ref|XP_013392959.1| PREDICTED: fibroblast growth factor receptor-like 1 [Lingula anatina] ref|XP_013392960.1|	3e-101	50	66	5
comp2223254_c0_seq1	3.39923	2.04547	3.10149	2507.89	11689.8	1.75159	1.23905	1.46105	ref|XP_011437078.1| PREDICTED: uncharacterized protein LOC105335088 [Crassostrea gigas] gb|EKC27421.1| hypothetical protein CGI_10025411 [Crassostrea gigas]	2e-28	43	54	7
comp2223390_c0_seq2	137.57	161.362	142.502	65.1246	73.0869	168.525	152.511	86.1619	NA	NA	NA	NA	NA
comp2223422_c0_seq1	454.942	521.954	501.313	174.812	200.728	450.134	472.033	486.553	ref|XP_009010827.1| hypothetical protein HELRODRAFT_190088 [Helobdella robusta] gb|ESO10558.1| hypothetical protein HELRODRAFT_190088 [Helobdella robusta]	5e-156	76	88	3
comp2223453_c0_seq1	27.0584	32.8729	38.1234	16.2154	3.68114	19.7204	23.44	37.9645	NA	NA	NA	NA	NA
comp2223496_c0_seq3	45.3912	42.6665	35.284	76.9429	110.349	44.121	44.9783	48.3252	NA	NA	NA	NA	NA
comp2223620_c0_seq1	14.4523	18.4255	27.2499	171.711	196.13	9.87605	27.7823	37.4544	NA	NA	NA	NA	NA
comp2223643_c0_seq2	40.6161	23.7982	23.3711	51.9557	51.4662	32.2262	30.4544	24.002	NA	NA	NA	NA	NA
comp2223788_c0_seq1	9.36542	19.5286	15.1592	27.2957	23.2549	8.09854	13.9853	11.8227	NA	NA	NA	NA	NA
comp2223797_c0_seq1	18.657	28.478	35.8443	6.42282	8.90591	24.0107	47.517	54.0455	NA	NA	NA	NA	NA
comp2223830_c0_seq1	92.0982	46.3129	51	162.616	123.599	87.3637	62.0262	61.3557	NA	NA	NA	NA	NA
comp2223856_c0_seq2	7.8711	21.9492	18.3671	17.8551	27.292	16.4893	30.8947	15.1749	NA	NA	NA	NA	NA
comp2223871_c0_seq1	141.831	144.399	135.711	84.0671	80.3721	176.401	124.371	134.892	ref|XP_009051934.1| hypothetical protein LOTGIDRAFT_231528 [Lottia gigantea] gb|ESO97332.1| hypothetical protein LOTGIDRAFT_231528 [Lottia gigantea]	3e-29	37	59	7
comp2223873_c0_seq1	20.3872	52.4463	43.9344	3.91807	4.62412	14.3746	39.1157	31.0126	gb|KMQ81648.1| gag-pol fusion protein, partial [Lasius niger]	8e-45	45	62	9
comp2223888_c0_seq2	86.9185	53.1951	55.5735	130.373	131.606	82.7154	64.9274	31.5743	NA	NA	NA	NA	NA
comp2223925_c0_seq1	79.701	148.629	144.246	90.0659	35.332	98.9464	170.482	134.179	NA	NA	NA	NA	NA
comp2223962_c0_seq7	1844.43	2554.55	2719.74	1173.53	836.742	2166.3	2811.16	3243.83	gb|ELT96049.1| hypothetical protein CAPTEDRAFT_223820 [Capitella teleta]	1e-14	38	54	1
comp2223990_c0_seq1	4.54935	3.49697	3.34129	15.0939	32.312	6.18067	2.33329	3.95177	NA	NA	NA	NA	NA
comp2223996_c0_seq1	55.3672	159.542	157.857	35.0022	30.7348	89.3375	66.4669	84.6095	NA	NA	NA	NA	NA
comp2224009_c0_seq1	19.3525	15.8095	27.3421	1.25237	5.74158	20.7155	14.9986	16.8457	NA	NA	NA	NA	NA
comp2224014_c0_seq1	3230.64	2917.07	3108.47	10130.1	7425.55	3860.83	3324.64	3208.64	sp|Q6QLW4.1|CYC_PECGU RecName: Full=Cytochrome c gb|AAS48105.1| cytochrome c [Pectinaria gouldii]	8e-66	92	96	0
comp2224040_c0_seq1	28193.5	20697.4	18852.2	16810.1	10387.3	25451.8	25613.6	22614.3	ref|XP_005109109.1| PREDICTED: 60S ribosomal protein L14 [Aplysia californica]	4e-62	71	88	0
comp2224089_c0_seq1	65.0532	55.0541	48.5326	2535.46	2417.03	46.9309	79.6594	36.6974	NA	NA	NA	NA	NA
comp2224092_c0_seq1	69.1191	75.5391	76.3417	202.605	266.8	96.2085	93.963	58.6816	NA	NA	NA	NA	NA
comp2224123_c0_seq1	28.9396	27.7419	20.1753	3.9822	9.85569	27.0357	16.3303	27.0815	NA	NA	NA	NA	NA
comp2224231_c0_seq1	39.3428	25.2252	18.0945	6.42282	10.953	31.0381	34.3049	17.2046	NA	NA	NA	NA	NA
comp2224269_c0_seq1	22.305	48.6881	39.8475	81.1175	90.2003	36.6385	34.8286	24.5062	NA	NA	NA	NA	NA
comp2224273_c0_seq2	56.2807	87.6584	77.7287	21.9656	34.6944	56.5244	62.1392	47.9274	NA	NA	NA	NA	NA
comp2224302_c0_seq1	84.2411	85.4778	70.0984	25.4976	27.842	93.615	83.3444	53.8194	NA	NA	NA	NA	NA
comp2224402_c0_seq2	4.98027	11.4692	9.69788	19.3967	37.1846	2.69172	6.42957	10.0199	NA	NA	NA	NA	NA
comp2224411_c0_seq1	37.6568	20.8464	20.0435	63.2898	53.9321	36.4681	24.1755	26.7042	NA	NA	NA	NA	NA
comp2224442_c0_seq1	31.5823	23.163	28.0714	64.1941	90.7207	28.7125	26.8647	22.9865	NA	NA	NA	NA	NA
comp2224448_c0_seq1	8853.63	7946.6	6891.01	5177.91	3552.86	9432.15	9132.87	8526.25	gb|AAH39635.1| eukaryotic translation elongation factor 1 beta 2, partial [Mus musculus]	7e-67	75	88	3
comp2224449_c0_seq1	27.8853	31.1269	33.4004	131.308	177.492	37.9038	27.3163	25.5194	NA	NA	NA	NA	NA
comp2224584_c0_seq2	282.969	213.687	209.501	148.836	145.842	230.065	181.349	212.104	NA	NA	NA	NA	NA
comp2224705_c0_seq1	1175.83	1215.12	1149.69	1826.53	1635.72	1286.65	1084.03	1098.27	gb|ELT91635.1| hypothetical protein CAPTEDRAFT_136848 [Capitella teleta]	1e-15	61	83	0
comp2224708_c0_seq1	10657.1	8298.61	8891.84	26272	23457.5	10347.1	12519.7	11070.4	gb|ELT95355.1| hypothetical protein CAPTEDRAFT_197303 [Capitella teleta]	5e-55	38	57	8
comp2224718_c0_seq1	2.71676	0.687152	0.66429	17.274	3.68114	2.35173	0.845299	0.764275	ref|YP_008857685.1| putative DNA polymerase [Pseudomonas phage PAK_P3] gb|ADX32056.1| putative DNA polymerase [Pseudomonas phage P3_CHA] gb|ADX32241.1| putative DNA polymerase [Pseudomonas phage PAK_P	3e-114	48	61	6
comp2224744_c0_seq1	12.3224	16.0213	14.8841	33.8127	34.6675	17.3781	13.0213	14.6174	NA	NA	NA	NA	NA
comp2224757_c0_seq1	50.611	39.9977	28.8459	14.3218	12.9162	42.63	33.639	40.0429	NA	NA	NA	NA	NA
comp2224767_c0_seq1	80.8903	97.8372	112.264	188.086	195.664	151.827	139.24	119.432	NA	NA	NA	NA	NA
comp2224794_c0_seq1	18.0811	23.5937	28.8393	79.3194	85.8453	18.7762	22.5947	18.8109	NA	NA	NA	NA	NA
comp2224827_c0_seq1	226.194	387.066	342.578	195.018	139.702	273.933	249.377	220.251	gb|ELT99444.1| hypothetical protein CAPTEDRAFT_172510 [Capitella teleta]	4e-75	38	54	7
comp2224883_c0_seq1	124.954	100.271	109.843	573.692	707.411	97.1718	112.713	84.8675	NA	NA	NA	NA	NA
comp2224925_c0_seq2	9.14354	13.7249	13.6404	18.7227	56.3089	9.03994	17.8471	14.3862	NA	NA	NA	NA	NA
comp2224932_c0_seq1	66.672	51.6087	45.8602	198.194	215.27	68.9782	76.3217	58.398	NA	NA	NA	NA	NA
comp2224946_c0_seq1	16.4988	14.0723	14.6366	54.0102	37.1607	15.2124	13.3138	19.3038	NA	NA	NA	NA	NA
comp2225054_c0_seq1	4.88734	9.11777	13.0059	38.6638	24.379	5.05084	5.47136	9.17559	NA	NA	NA	NA	NA
comp2225056_c0_seq1	13.9968	11.3022	12.5181	32.241	34.0602	10.066	13.111	8.2638	ref|XP_011430991.1| PREDICTED: dynein heavy chain 5, axonemal-like [Crassostrea gigas]	5e-144	88	96	0
comp2225064_c0_seq1	62.749	93.7715	104.302	634.48	617.45	71.9302	97.8449	98.9293	ref|XP_009044955.1| hypothetical protein LOTGIDRAFT_136347 [Lottia gigantea] gb|ESP04352.1| hypothetical protein LOTGIDRAFT_136347 [Lottia gigantea]	2e-79	63	76	5
comp2225089_c0_seq1	2.01811	3.99717	4.77587	32.2397	16.5065	4.41712	8.2881	5.67527	ref|XP_002599966.1| hypothetical protein BRAFLDRAFT_165930 [Branchiostoma floridae] gb|EEN55978.1| hypothetical protein BRAFLDRAFT_165930, partial [Branchiostoma floridae]	4e-55	58	77	1
comp2225266_c0_seq1	34.7209	13.1878	18.5011	6.77483	8.31205	36.3109	15.4299	14.7642	NA	NA	NA	NA	NA
comp2225417_c0_seq1	386.732	383.205	346.137	973.737	846.139	355.369	475.186	428.849	ref|XP_013395447.1| PREDICTED: outer dense fiber protein 3-like [Lingula anatina]	5e-80	56	67	1
comp2225511_c0_seq1	378.711	414.671	389.135	553.637	578.792	426.433	457.304	330.004	gb|ELU17523.1| hypothetical protein CAPTEDRAFT_150346, partial [Capitella teleta]	5e-54	73	85	0
comp2225541_c0_seq2	208.887	165.675	136.985	118.903	71.9257	190.312	139.796	179.749	NA	NA	NA	NA	NA
comp2225573_c0_seq1	57.8222	90.2485	93.8354	27.2341	31.9431	41.5604	65.2686	81.6131	NA	NA	NA	NA	NA
comp2225624_c0_seq1	8.79241	14.7011	29.2854	63.3579	51.5295	13.5048	27.7132	9.7999	NA	NA	NA	NA	NA
comp2225625_c0_seq1	2.45242	3.3051	1.52518	39.3404	63.5572	2.69911	0.891628	1.55819	NA	NA	NA	NA	NA
comp2225664_c0_seq1	288892	493202	709791	104549	84055.7	245103	523847	683401	ref|XP_011198527.1| PREDICTED: actin, cytoplasmic A3a isoform X1 [Bactrocera dorsalis]	0	98	99	0
comp2225718_c0_seq1	53.1156	33.8429	64.0891	3.62887	4.79859	53.7652	46.4749	67.1436	ref|XP_013078971.1| PREDICTED: uncharacterized protein LOC106064877 isoform X1 [Biomphalaria glabrata] ref|XP_013078979.1| PREDICTED: uncharacterized protein LOC106064877 isoform X2 [Biomphalaria glab	3e-10	35	54	21
comp2225758_c0_seq4	979.776	923.763	950.113	550.776	483.238	1115.18	988.729	1043.39	ref|XP_002609653.1| hypothetical protein BRAFLDRAFT_123569 [Branchiostoma floridae] gb|EEN65663.1| hypothetical protein BRAFLDRAFT_123569 [Branchiostoma floridae]	4e-40	45	58	5
comp2225761_c0_seq1	47.4602	38.9681	39.7584	69.0427	99.915	61.0638	44.9927	21.4527	NA	NA	NA	NA	NA
comp2225804_c0_seq1	135.522	124.316	146.204	27.81	33.6676	107.246	113.217	86.0469	NA	NA	NA	NA	NA
comp2225875_c0_seq1	16.3697	14.8843	8.43983	74.4657	39.2914	9.6429	14.3878	12.8695	NA	NA	NA	NA	NA
comp2225897_c0_seq1	534.41	577.588	542.334	301.686	252.992	606.505	549.553	516.325	gb|ELU06670.1| hypothetical protein CAPTEDRAFT_220144 [Capitella teleta]	6e-08	30	52	7
comp2225941_c0_seq1	121.723	207.756	264.19	38.6023	91.9436	106.103	138.015	127.83	NA	NA	NA	NA	NA
comp2225956_c0_seq1	4.23862	3.27528	3.95268	48.0115	32.5841	1.43168	3.27706	3.23425	NA	NA	NA	NA	NA
comp2226005_c0_seq5	12.215	22.7747	14.7955	45.3431	30.2883	17.7829	17.0828	16.5855	ref|WP_017746297.1| hypothetical protein [Scytonema hofmanni]	1e-08	32	52	8
comp2226014_c0_seq1	725.089	1080.91	1125.45	473.075	349.527	796.205	1247.32	1131.95	NA	NA	NA	NA	NA
comp2226033_c0_seq1	54.041	57.3214	58.6214	344.383	333.936	91.8255	48.7156	50.6457	NA	NA	NA	NA	NA
comp2226073_c0_seq2	2.97932	19.6331	13.8939	83.6169	187.498	4.14067	23.5963	13.8953	ref|XP_014478341.1| PREDICTED: 3-oxoacyl-[acyl-carrier-protein] reductase FabG [Dinoponera quadriceps] ref|XP_014478342.1| PREDICTED: 3-oxoacyl-[acyl-carrier-protein] reductase FabG [Dinoponera quadri	6e-42	41	61	3
comp2226146_c0_seq1	21.0086	9.52301	9.60533	53.7237	49.6068	12.7324	9.41137	13.5462	NA	NA	NA	NA	NA
comp2226152_c0_seq1	22.434	50.112	34.3747	15.3163	11.567	20.8408	50.0968	64.18	NA	NA	NA	NA	NA
comp2226190_c0_seq1	11.7608	18.8034	10.8905	41.1345	36.3991	13.5583	14.6163	15.8213	NA	NA	NA	NA	NA
comp2226296_c1_seq1	9.63357	14.234	14.3893	20.6491	41.6942	10.9808	19.5377	11.3238	NA	NA	NA	NA	NA
comp2226307_c0_seq1	57.1174	52.4295	69.8945	18.304	11.2247	65.2545	74.2083	53.6342	NA	NA	NA	NA	NA
comp2226309_c1_seq1	15.9495	25.9971	7.90888	9.44054	1.02683	14.4397	19.691	8.14064	gb|AGS55447.1| hairy enhancer of split 13 [Platynereis dumerilii]	7e-77	100	100	0
comp2226460_c0_seq1	19.0733	1085.67	10.3622	846.523	8.98994	71.621	833.612	9.11564	NA	NA	NA	NA	NA
comp2226485_c0_seq1	169.427	206.592	187.45	144.214	114.237	36.6746	247.065	474.016	NA	NA	NA	NA	NA
comp2226542_c0_seq1	5.0088	9.13313	8.04221	25.5944	23.6239	6.19948	11.7764	5.87316	gb|ELT90605.1| hypothetical protein CAPTEDRAFT_191992 [Capitella teleta]	6e-10	29	48	3
comp2226616_c0_seq1	55.4902	67.0576	69.3244	25.0801	34.6409	49.148	61.5108	55.3851	NA	NA	NA	NA	NA
comp2226655_c0_seq1	331.627	351.842	312.406	210.169	227.301	323.951	283.438	276.342	ref|XP_011433749.1| PREDICTED: prefoldin subunit 6-like [Crassostrea gigas] gb|EKC33585.1| Prefoldin subunit 6 [Crassostrea gigas]	3e-45	76	90	0
comp2226697_c0_seq1	0	3.65373	0.424492	2.9222	3.8556	0.134775	4.44657	2.82429	NA	NA	NA	NA	NA
comp2226744_c0_seq1	5.35675	4.23267	3.67762	30.7335	70.7677	4.56257	2.6807	2.49962	NA	NA	NA	NA	NA
comp2226843_c0_seq1	934.838	955.679	777.001	369.284	532.62	751.44	869.865	903.713	ref|XP_013416840.1| PREDICTED: protein LLP homolog [Lingula anatina] ref|XP_013416841.1| PREDICTED: protein LLP homolog [Lingula anatina]	5e-15	49	66	7
comp2226860_c0_seq1	11.5064	59.488	70.3963	5.87579	22.6543	10.7249	30.3158	9.75449	NA	NA	NA	NA	NA
comp2226921_c0_seq1	78.4843	129.653	147.191	76.2951	66.171	81.3007	93.7513	125.59	ref|XP_009010107.1| hypothetical protein HELRODRAFT_166632 [Helobdella robusta] gb|ESO11619.1| hypothetical protein HELRODRAFT_166632 [Helobdella robusta]	1e-06	47	75	0
comp2227106_c0_seq2	178.14	188.41	187.914	286.604	425.044	156.008	153.566	174.605	ref|XP_013415844.1| PREDICTED: cilia- and flagella-associated protein 99-like [Lingula anatina]	0	59	79	0
comp2227117_c0_seq2	1226.72	1376.86	1168.62	614.224	576.418	1316.99	1217.87	1185.66	ref|XP_013390948.1| PREDICTED: prostaglandin E synthase 3-like [Lingula anatina]	2e-40	56	74	2
comp2227194_c1_seq1	77.9655	139.311	143.682	10.8552	10.7853	58.8989	107.638	67.5575	gb|ADN44548.1| cytochrome P450 CYP17a/20-lyase [Perinereis nuntia]	3e-56	56	71	7
comp2227317_c0_seq2	35.6667	54.2666	68.314	9.15265	22.074	29.3084	46.5676	59.3362	NA	NA	NA	NA	NA
comp2227318_c0_seq2	12.7058	22.6629	26.1588	62.7154	45.8279	14.1444	24.7225	27.3809	gb|ADB91414.2| MIP16009p1 [Drosophila melanogaster]	6e-36	38	57	2
comp2227525_c0_seq3	2.40906	4.36335	6.40949	34.1673	52.2415	1.96138	1.56039	1.7057	NA	NA	NA	NA	NA
comp2227687_c0_seq1	195.625	111.939	139.663	342.94	301.713	218.868	124.948	100.96	ref|XP_005099762.1| PREDICTED: EF-hand calcium-binding domain-containing protein 10-like [Aplysia californica]	1e-42	59	83	0
comp2227947_c0_seq3	16.3198	21.2092	19.1321	31.5958	21.6676	31.8246	12.0949	10.8724	ref|XP_011679545.1| PREDICTED: uncharacterized protein LOC588258 [Strongylocentrotus purpuratus]	8e-08	48	67	0
comp2228128_c0_seq1	86.7609	33.9671	52.5251	16.6028	25.5234	39.0844	63.7575	57.8827	NA	NA	NA	NA	NA
comp2228189_c0_seq2	2.73257	16.3367	25.4689	2.50474	6.41947	4.19056	19.9313	8.5292	NA	NA	NA	NA	NA
comp2228206_c0_seq1	14.0625	18.9876	23.984	5.45834	2.30537	9.56836	14.4108	17.5988	ref|XP_015151018.1| PREDICTED: canalicular multispecific organic anion transporter 2 isoform X6 [Gallus gallus]	7e-43	33	59	8
comp2228213_c0_seq2	22.1477	19.4309	16.5471	38.7606	64.8123	3.49708	16.8166	18.7842	ref|XP_015346193.1| PREDICTED: zonadhesin [Marmota marmota marmota]	5e-07	32	55	5
comp2228240_c0_seq1	8.97447	41.0966	27.0438	0.77079	7.02672	4.83133	27.3106	11.4625	ref|XP_006981106.1| PREDICTED: leucine-rich repeat-containing protein 26 [Peromyscus maniculatus bairdii]	3e-10	31	53	9
comp2228256_c0_seq1	310.95	347.21	340.954	224.389	124.489	292.074	244.712	210.366	gb|ELT88706.1| hypothetical protein CAPTEDRAFT_175708 [Capitella teleta]	0	65	76	0
comp2228339_c0_seq1	60.0278	111.357	96.6755	156.186	128.094	73.5468	115.165	137.856	gb|ABO26679.1| hypoxanthine phosphoribosyltransferase 1 [Haliotis discus discus]	3e-104	67	84	0
comp2228369_c0_seq1	26740.1	22891.3	21820.8	14127.8	10065.8	29465.8	25210.2	22029.3	gb|ACR24948.1| ribosomal protein L15 [Lepidochitona cinerea]	2e-100	77	89	0
comp2228396_c0_seq1	32.9673	33.8017	37.5685	137.886	75.4796	38.5237	26.8792	24.4265	NA	NA	NA	NA	NA
comp2228411_c0_seq1	37.719	28.6571	27.294	52.5368	72.979	23.6894	33.914	27.3127	NA	NA	NA	NA	NA
comp2228469_c0_seq1	0.124927	7.59309	2.62762	14.611	8.06015	0.519017	2.47514	9.96356	ref|WP_050433251.1| hypothetical protein [Chondromyces crocatus] gb|AKT41462.1| uncharacterized protein CMC5_056650 [Chondromyces crocatus]	1e-11	43	61	6
comp2228494_c2_seq1	0	0.794145	0.522793	1.25237	7.02012	0.134775	0.825045	1.66784	NA	NA	NA	NA	NA
comp2228534_c0_seq1	4.24342	6.19605	4.69741	32.7841	27.8816	11.243	6.13717	4.85534	NA	NA	NA	NA	NA
comp2228660_c0_seq1	12.861	9.35878	6.07712	38.245	20.9763	13.3665	7.44575	8.61744	NA	NA	NA	NA	NA
comp2228719_c0_seq1	14.8527	24.0467	17.6008	72.1952	121.265	13.9326	28.4255	14.3981	NA	NA	NA	NA	NA
comp2228733_c0_seq1	20.3709	52.2659	36.0719	0	2.82218	29.1088	28.0401	31.8272	NA	NA	NA	NA	NA
comp2228905_c0_seq1	8.32957	15.4174	18.7281	2.85808	3.15773	10.951	8.90471	9.47063	NA	NA	NA	NA	NA
comp2228913_c0_seq2	61.7068	43.2598	65.3476	22.383	27.9126	57.1423	49.4795	57.9041	gb|EKC38957.1| hypothetical protein CGI_10026724 [Crassostrea gigas]	1e-12	44	68	0
comp2228962_c0_seq1	26.0354	22.7366	21.6998	16.6996	21.557	40.6714	11.4581	10.6781	gb|ELU15109.1| hypothetical protein CAPTEDRAFT_228582 [Capitella teleta]	7e-13	35	64	0
comp2228974_c3_seq2	12.5086	6.79591	10.3544	26.6531	72.4218	13.7348	9.46065	14.7448	ref|XP_011443392.1| PREDICTED: uncharacterized protein LOC105339519 [Crassostrea gigas]	1e-11	32	55	5
comp2228984_c0_seq1	472.582	742.087	777.245	407.438	390.003	456.625	624.046	646.706	gb|ELT97334.1| hypothetical protein CAPTEDRAFT_123673 [Capitella teleta]	1e-76	59	78	0
comp2229047_c0_seq1	20.9569	25.2595	36.8676	1.18825	6.5101	10.9693	28.5959	22.4541	gb|KFQ78795.1| N-acetylated-alpha-linked acidic dipeptidase 2, partial [Phoenicopterus ruber ruber]	5e-16	43	65	1
comp2229048_c0_seq1	6.9856	3.37675	3.88964	18.656	18.9293	5.53628	5.43381	6.06744	NA	NA	NA	NA	NA
comp2229085_c0_seq1	11.1568	48.0324	33.3201	4.27141	2.99665	18.9143	40.9371	19.5448	NA	NA	NA	NA	NA
comp2229175_c0_seq1	14.4022	20.4959	17.9539	0.417457	2.82218	22.1765	19.0368	5.56923	NA	NA	NA	NA	NA
comp2229224_c0_seq1	61.2826	14.6667	18.2475	27.5194	36.0572	20.4034	33.3116	48.3295	ref|WP_012599632.1| hypothetical protein [Cyanothece sp. PCC 7424] gb|ACK73717.1| conserved hypothetical protein [Cyanothece sp. PCC 7424]	2e-37	28	49	6
comp2229342_c0_seq1	3.61843	1.72449	2.41361	81.9825	33.0905	2.83717	3.25681	8.55816	ref|XP_009056331.1| hypothetical protein LOTGIDRAFT_232855 [Lottia gigantea] gb|ESO93132.1| hypothetical protein LOTGIDRAFT_232855 [Lottia gigantea]	3e-67	47	67	1
comp2229424_c0_seq3	16.2795	27.8261	21.1076	15.3805	8.99673	12.3555	26.7172	17.9784	NA	NA	NA	NA	NA
comp2229441_c0_seq1	14.4535	24.6203	33.2986	6.77483	6.48993	14.8544	9.11896	15.2289	ref|XP_014040825.1| PREDICTED: myb/SANT-like DNA-binding domain-containing protein 4 [Salmo salar]	5e-06	45	63	9
comp2229511_c0_seq2	182.149	145.51	164.41	126.709	116.597	211.983	147.441	143.314	ref|XP_014778327.1| PREDICTED: mimitin, mitochondrial-like [Octopus bimaculoides]	1e-26	44	63	5
comp2229573_c0_seq1	9.17785	6.96468	8.57163	0.417457	0.600649	10.4498	4.53923	12.501	NA	NA	NA	NA	NA
comp2229575_c0_seq1	1595.01	1605	1523.1	507.898	425.213	1858.41	1656.82	1382.96	ref|XP_013397066.1| PREDICTED: eukaryotic translation initiation factor 3 subunit M-like [Lingula anatina] ref|XP_013401414.1| PREDICTED: eukaryotic translation initiation factor 3 subunit M-like [Lin	2e-141	55	74	1
comp2229590_c0_seq1	7.34597	5.0053	5.57991	17.5332	23.1913	6.98804	7.43993	7.99773	ref|XP_011564788.1| PREDICTED: RNA-directed DNA polymerase from mobile element jockey-like [Plutella xylostella]	6e-26	32	54	3
comp2229633_c0_seq1	31.9258	37.5397	52.9847	8.51011	13.7047	38.2006	47.219	37.8137	NA	NA	NA	NA	NA
comp2229738_c0_seq1	30.0876	21.3454	21.276	30.8905	29.8489	46.473	20.0182	19.1029	ref|XP_002591670.1| hypothetical protein BRAFLDRAFT_223334 [Branchiostoma floridae] gb|EEN47681.1| hypothetical protein BRAFLDRAFT_223334, partial [Branchiostoma floridae]	4e-13	29	49	4
comp2229746_c0_seq2	201.87	223.25	204.662	105.482	68.6776	256.978	203.001	231.865	ref|XP_013412024.1| PREDICTED: ATP-dependent DNA helicase Q1-like [Lingula anatina] ref|XP_013412025.1| PREDICTED: ATP-dependent DNA helicase Q1-like [Lingula anatina] ref|XP_013412027.1| PREDICTED: A	0	54	71	5
comp2229846_c0_seq1	106.896	281.399	279.59	1904.53	2676.82	54.9227	225.498	175.849	NA	NA	NA	NA	NA
comp2230260_c0_seq1	13.0399	28.9832	25.2979	4.52791	1.70472	18.1196	21.3442	28.0978	NA	NA	NA	NA	NA
comp2230347_c0_seq1	513.162	530.441	554.437	371.466	288.21	521.322	483.594	499.226	emb|CAJ38808.1| Lodestar protein [Platynereis dumerilii]	0	99	99	0
comp2230408_c0_seq1	1.01079	0.804606	0.50516	4.81711	4.10732	0.269549	0.917702	0	NA	NA	NA	NA	NA
comp2230408_c1_seq1	0	0.106992	0.314512	1.6057	1.27854	0.286337	0	0.333568	NA	NA	NA	NA	NA
comp2230437_c0_seq1	524.168	460.242	482.817	376.408	314.112	572.21	628.621	413.164	ref|XP_009056354.1| hypothetical protein LOTGIDRAFT_145414 [Lottia gigantea] gb|ESO92950.1| hypothetical protein LOTGIDRAFT_145414 [Lottia gigantea]	6e-65	49	67	2
comp2230509_c0_seq2	1180.06	1214.29	1192.2	1812.56	2578.36	1311.46	1079.02	1107.19	gb|ELU06518.1| hypothetical protein CAPTEDRAFT_90714, partial [Capitella teleta]	0	64	77	10
comp2230534_c0_seq1	6.44564	11.8239	7.05966	19.9751	40.614	5.34376	8.6702	7.17418	NA	NA	NA	NA	NA
comp2230600_c0_seq1	491.757	830.134	719.516	510.763	892.753	196.416	887.618	972.637	NA	NA	NA	NA	NA
comp2230895_c0_seq3	171.44	212.11	201.419	292.697	278.619	189.154	221.779	159.728	ref|XP_013418720.1| PREDICTED: cerebral cavernous malformations protein 2 homolog isoform X2 [Lingula anatina]	1e-90	41	61	10
comp2230914_c0_seq1	10.678	4.63974	4.41244	30.1498	19.795	8.39635	9.06395	7.74418	ref|XP_013414368.1| PREDICTED: LOW QUALITY PROTEIN: ATP-binding cassette sub-family A member 1-like [Lingula anatina]	2e-26	38	48	23
comp2230935_c0_seq1	79.4528	70.1673	64.2875	52.3705	38.6977	86.3062	57.1602	54.7637	gb|ELT93419.1| hypothetical protein CAPTEDRAFT_165154 [Capitella teleta]	3e-47	54	72	0
comp2231093_c0_seq1	4.79927	2.17398	1.89678	16.5046	23.6175	0.960209	1.48799	0.971068	gb|ELT91898.1| hypothetical protein CAPTEDRAFT_216420 [Capitella teleta]	4e-34	39	60	3
comp2231106_c0_seq2	0.866579	0.582923	1.09474	3.27553	7.95632	1.01057	0	0	gb|AFP66953.1| cytochrome P450 [Perinereis nuntia]	2e-13	65	80	0
comp2231128_c0_seq2	10.5177	8.09583	9.86494	89.4901	48.3186	11.4695	11.7332	6.12672	ref|XP_013407414.1| PREDICTED: sodium-coupled monocarboxylate transporter 1-like [Lingula anatina]	4e-20	49	76	0
comp2231158_c0_seq3	297.365	352.964	350.706	71.2294	137.215	269.883	349.558	336.544	NA	NA	NA	NA	NA
comp2231206_c0_seq1	99.8978	55.921	45.4884	14.2576	21.3959	80.6927	75.2822	43.4425	NA	NA	NA	NA	NA
comp2231262_c0_seq2	15.1737	62.6878	55.9566	3.27553	21.0536	13.2463	75.7277	91.5929	NA	NA	NA	NA	NA
comp2231262_c1_seq3	2749.89	4790.68	4394.18	7338.4	5344.44	3445.27	5097.28	4774.24	ref|XP_013403677.1| PREDICTED: sestrin-1-like isoform X1 [Lingula anatina]	0	61	78	1
comp2231285_c0_seq1	27.1516	45.0732	28.1532	6.29325	2.99665	7.0519	27.936	56.1036	gb|ELT98471.1| hypothetical protein CAPTEDRAFT_124859 [Capitella teleta]	3e-66	47	72	0
comp2231470_c0_seq1	385.698	427.532	437.015	862.799	767.222	516.011	389.504	353.743	gb|ELU11228.1| hypothetical protein CAPTEDRAFT_212855 [Capitella teleta]	2e-80	52	67	5
comp2231595_c0_seq1	31.4127	25.0932	33.5387	21.1921	9.33228	25.176	38.4936	18.3126	gb|ACQ83470.1| receptor of activated protein kinase C [Platynereis dumerilii]	5e-152	72	81	2
comp2231632_c0_seq2	52.7891	51.4912	46.8782	27.0378	18.5939	63.2159	43.4787	44.1775	ref|XP_014488440.1| PREDICTED: gamma-glutamylcyclotransferase-like [Dinoponera quadriceps]	1e-34	42	59	6
comp2231722_c0_seq1	426.203	810.721	384.359	1184.46	1359.1	390.491	836.559	639.632	NA	NA	NA	NA	NA
comp2231741_c0_seq1	23.8531	14.7844	21.6481	1.66983	2.14429	9.38026	28.8626	17.2543	NA	NA	NA	NA	NA
comp2231842_c0_seq1	6.14798	13.534	11.5312	6.29325	3.42283	11.0987	8.78327	5.56923	NA	NA	NA	NA	NA
comp2231854_c0_seq1	76.1262	29.8593	39.8362	9.11994	20.9899	53.1919	31.8441	33.475	gb|KFP72508.1| Protein FAM206A, partial [Apaloderma vittatum]	2e-27	44	74	0
comp2231865_c0_seq1	30.5231	17.8356	18.3361	197.902	124.455	52.7635	33.3407	31.3899	ref|XP_005099829.1| PREDICTED: uncharacterized protein LOC101854331 [Aplysia californica]	6e-05	41	55	6
comp2231945_c0_seq2	39.5829	140.171	130.415	22.9261	7.09058	32.4446	117.861	133.084	ref|WP_039418237.1| hypothetical protein [Xanthomonas euvesicatoria] gb|KHL64684.1| hypothetical protein XEU83M_15990 [Xanthomonas euvesicatoria] gb|KLB44974.1| hypothetical protein XEUV259_17250 [Xan	3e-11	34	55	6
comp2231993_c0_seq1	51.7688	46.3982	35.9327	3.91807	7.53014	33.8127	35.2021	59.5348	NA	NA	NA	NA	NA
comp2231997_c0_seq1	555.169	888.717	1017.19	463.177	367.9	585.888	767.135	798.107	gb|ELU13279.1| hypothetical protein CAPTEDRAFT_146304 [Capitella teleta]	1e-108	64	79	1
comp2232024_c0_seq1	157.431	217.156	303.529	932.92	577.926	146.556	135.748	182.549	gb|ELT95892.1| hypothetical protein CAPTEDRAFT_176101 [Capitella teleta]	1e-130	59	74	1
comp2232048_c0_seq1	8.44348	7.09873	10.3423	23.2192	34.409	11.2917	7.05201	10.7805	NA	NA	NA	NA	NA
comp2232050_c0_seq1	137.423	161.821	197.746	28.0992	47.939	121.113	145.944	176.979	NA	NA	NA	NA	NA
comp2232057_c0_seq1	11.3347	4.10416	4.24735	1.18825	1.2013	4.34997	13.3746	6.55675	ref|WP_033820562.1| swarming motility protein [Kitasatospora sp. MBT63]	3e-05	43	57	2
comp2232065_c0_seq1	33.7827	30.4136	41.8066	8.51011	15.3322	41.9906	18.2091	19.0769	NA	NA	NA	NA	NA
comp2232067_c0_seq2	52.396	55.0396	60.1698	323.645	294.706	81.2281	76.8916	63.937	NA	NA	NA	NA	NA
comp2232211_c0_seq1	246.467	372.467	468.536	803.939	713.81	190.441	532.305	422.873	ref|XP_013409098.1| PREDICTED: midnolin-like [Lingula anatina]	1e-38	60	84	1
comp2232252_c0_seq2	23.0955	21.0788	15.1517	5.94124	4.95968	23.2836	20.8666	11.0585	gb|EKC41844.1| Polycystic kidney disease protein 1-like 2 [Crassostrea gigas]	5e-09	25	48	5
comp2232263_c0_seq1	19.7334	12.1947	9.65027	85.932	96.1834	21.0031	15.1954	14.7221	NA	NA	NA	NA	NA
comp2232271_c0_seq1	17.9532	15.719	20.1085	1142.07	499.567	21.4758	24.6242	27.7783	gb|ELU08431.1| hypothetical protein CAPTEDRAFT_229153 [Capitella teleta]	6e-10	36	53	9
comp2232290_c0_seq2	15046.3	16619.1	19351.5	4014.37	5781.96	8708.92	15293.4	21248.7	NA	NA	NA	NA	NA
comp2232303_c0_seq2	134.627	160.533	150.45	50.8054	64.6477	119.547	141.77	132.326	NA	NA	NA	NA	NA
comp2232305_c0_seq1	433.492	719.143	656.234	129.321	349.395	332.66	786.64	557.273	gb|ELU04965.1| hypothetical protein CAPTEDRAFT_89242, partial [Capitella teleta]	2e-42	37	53	5
comp2232388_c0_seq1	88.0428	91.3322	96.2443	8.02852	42.9162	112.503	77.4417	73.7122	NA	NA	NA	NA	NA
comp2232392_c0_seq1	13.6605	12.9782	10.2579	52.3797	48.0333	7.66473	15.8003	7.08889	NA	NA	NA	NA	NA
comp2232414_c0_seq1	83.9426	57.9542	63.9335	24.3721	19.1746	19.0707	56.4588	81.3619	NA	NA	NA	NA	NA
comp2232415_c0_seq1	61.6965	73.6167	77.3586	25.0788	32.0201	79.852	78.6977	89.0418	gb|ELU18165.1| hypothetical protein CAPTEDRAFT_218690 [Capitella teleta]	1e-20	36	57	10
comp2232461_c0_seq1	6601.86	9213.75	8614.19	29174.8	17226.3	6300.26	15141.5	8405.67	NA	NA	NA	NA	NA
comp2232491_c0_seq2	943.035	775.386	894.401	456.147	543.685	935.793	619.206	641.269	ref|XP_009029613.1| hypothetical protein HELRODRAFT_89725 [Helobdella robusta] gb|ESN92237.1| hypothetical protein HELRODRAFT_89725 [Helobdella robusta]	1e-24	69	78	0
comp2232496_c0_seq2	252.256	259.564	272.209	136.859	136.916	211.15	246.994	300.407	ref|XP_013389021.1| PREDICTED: ATP-dependent DNA helicase Q4-like [Lingula anatina]	0	52	68	5
comp2232497_c0_seq1	13.6306	6.6394	7.43921	0.77079	1.54364	11.0255	8.80919	11.7457	NA	NA	NA	NA	NA
comp2232518_c0_seq1	119.231	180.307	205.63	750.255	757.233	124.762	204.184	152.842	gb|ELT95686.1| hypothetical protein CAPTEDRAFT_222682, partial [Capitella teleta]	4e-44	55	71	1
comp2232521_c0_seq2	427.203	736.97	777.732	1329.18	1482.87	342.384	718.27	654.818	gb|ELT94593.1| hypothetical protein CAPTEDRAFT_128073 [Capitella teleta]	0	74	84	4
comp2232535_c0_seq2	93485.1	105336	69401.3	285235	407918	120467	151854	161759	emb|CAC86665.1| rhabdomeric opsin [Platynereis dumerilii]	0	99	99	0
comp2232559_c0_seq1	32.2672	20.8925	20.9928	54.2393	60.7312	43.5815	26.3784	22.2637	gb|ELU14305.1| hypothetical protein CAPTEDRAFT_25162, partial [Capitella teleta]	3e-56	72	85	0
comp2232623_c0_seq1	60.5376	69.8572	82.7534	29.2206	18.2316	62.3697	56.2971	73.2664	ref|XP_013089739.1| PREDICTED: transcriptional regulatory protein AlgP-like [Biomphalaria glabrata]	3e-05	66	91	0
comp2232641_c0_seq7	7388.25	9435.89	9566.93	19580.8	17284.5	9428.21	10664.8	13071.3	gb|ELU10110.1| hypothetical protein CAPTEDRAFT_219480 [Capitella teleta]	0	74	84	2
comp2232773_c0_seq1	178.56	135.465	138.486	85.1219	49.0233	178.765	109.367	129.988	ref|XP_013403833.1| PREDICTED: DNA-directed RNA polymerase II subunit RPB3-like isoform X1 [Lingula anatina] ref|XP_013403834.1| PREDICTED: DNA-directed RNA polymerase II subunit RPB3-like isoform X2	5e-164	81	94	0
comp2232787_c0_seq1	107.101	99.6394	91.5295	26.2684	41.2684	126.041	93.7548	86.237	ref|XP_009023311.1| hypothetical protein HELRODRAFT_84352, partial [Helobdella robusta] gb|ESN98583.1| hypothetical protein HELRODRAFT_84352, partial [Helobdella robusta]	4e-33	60	75	1
comp2232805_c0_seq1	1043.53	1252.18	1779.98	6253.19	11369.4	874.162	1528.17	1798.44	gb|ELT87930.1| hypothetical protein CAPTEDRAFT_224291 [Capitella teleta]	1e-91	52	64	4
comp2232817_c0_seq2	160.094	126.218	153.967	2337.72	1409.54	235.653	92.2954	132.166	ref|XP_011415966.1| PREDICTED: uncharacterized protein LOC105319932 [Crassostrea gigas] gb|EKC28153.1| Atrial natriuretic peptide receptor A [Crassostrea gigas]	0	50	67	0
comp2232850_c0_seq1	1.92864	0.673928	1.2618	47.5587	72.3515	1.47593	1.46773	0.607861	NA	NA	NA	NA	NA
comp2232905_c0_seq1	15.0921	45.2992	32.8686	10.21	6.59394	17.6396	32.1973	47.5372	NA	NA	NA	NA	NA
comp2232946_c0_seq2	63.0251	61.1356	59.7704	16.4732	22.9595	92.8988	71.0644	62.4153	NA	NA	NA	NA	NA
comp2232992_c0_seq1	15.3775	24.1253	30.8436	11.0462	11.0502	20.4721	24.8817	24.6745	NA	NA	NA	NA	NA
comp2233004_c0_seq1	25.0796	39.1948	32.9409	11.2386	10.191	22.5113	41.8488	49.446	NA	NA	NA	NA	NA
comp2233022_c0_seq2	138.611	206.307	213.189	52.983	70.6509	243.54	117.177	168.896	NA	NA	NA	NA	NA
comp2233035_c0_seq1	14.4227	23.7453	23.7464	2.9222	3.25496	20.1501	19.8967	19.2919	NA	NA	NA	NA	NA
comp2233052_c0_seq5	115.703	88.861	90.5623	48.9353	54.3287	109.114	90.5674	67.3721	NA	NA	NA	NA	NA
comp2233064_c0_seq1	23.6902	10.3725	9.45169	38.054	61.98	15.9772	15.0767	23.5997	NA	NA	NA	NA	NA
comp2233085_c0_seq1	1.79891	0.42797	0	6.77483	2.74494	1.89704	2.01194	1.43141	emb|CDA44229.1| dNA primase [Prevotella sp. CAG:5226]	9e-07	56	71	0
comp2233110_c0_seq1	11.2138	8.60924	15.2974	64.4152	38.5097	10.583	21.3875	14.1784	gb|ELU14444.1| hypothetical protein CAPTEDRAFT_24678, partial [Capitella teleta]	4e-91	69	81	1
comp2233130_c0_seq1	2.40906	4.31815	5.65858	74.1777	47.9256	2.84658	8.56607	4.36174	gb|ELU09061.1| hypothetical protein CAPTEDRAFT_121679 [Capitella teleta]	1e-20	35	57	1
comp2233142_c0_seq1	12.744	15.6363	15.0336	0.834915	4.27519	6.04664	11.7968	18.7137	ref|XP_010750322.1| PREDICTED: dermatan-sulfate epimerase-like protein [Larimichthys crocea]	5e-95	51	69	0
comp2233168_c0_seq1	46.6939	75.2441	73.3389	2.9222	10.9664	70.0473	90.7117	81.4615	NA	NA	NA	NA	NA
comp2233251_c0_seq1	95.0741	69.5668	73.0839	29.9287	30.3156	56.538	47.3923	78.9334	ref|XP_013418134.1| PREDICTED: meiotic nuclear division protein 1 homolog isoform X1 [Lingula anatina]	5e-83	71	85	0
comp2233266_c0_seq1	9.43845	2.8258	3.00914	25.3052	28.2883	6.50716	4.40615	2.3521	NA	NA	NA	NA	NA
comp2233319_c0_seq1	9.47799	11.894	12.2647	51.5409	29.1137	11.8169	11.3567	12.5277	NA	NA	NA	NA	NA
comp2233346_c0_seq2	24.0151	24.8485	20.9718	3.69299	4.79859	28.6027	27.1514	18.4173	NA	NA	NA	NA	NA
comp2233399_c0_seq1	58.888	45.781	38.8995	11.3041	21.3119	72.7568	43.5972	51.5841	NA	NA	NA	NA	NA
comp2233405_c0_seq3	22.3087	22.9595	16.1618	3.62887	4.10732	28.5257	20.687	15.8199	NA	NA	NA	NA	NA
comp2233474_c0_seq1	3.11562	0.213985	1.72376	0	0	2.2874	1.14639	0.333568	emb|CEL97861.1| unnamed protein product [Vitrella brassicaformis CCMP3155]	3e-26	40	65	2
comp2233526_c0_seq1	22.3335	62.4067	52.2544	15.5755	9.66104	15.5397	43.7277	32.4914	NA	NA	NA	NA	NA
comp2233551_c0_seq2	6.71689	4.22499	2.94611	388.553	75.8057	8.31039	10.2449	3.92213	NA	NA	NA	NA	NA
comp2233616_c0_seq2	41.9719	27.4793	36.0708	3.21141	7.62077	21.1138	26.9806	42.5225	ref|XP_003390636.1| PREDICTED: poly [ADP-ribose] polymerase 14-like [Amphimedon queenslandica]	5e-44	52	65	4
comp2233646_c0_seq2	5.26826	2.22963	4.73686	55.845	65.7685	3.69618	5.35263	3.95177	NA	NA	NA	NA	NA
comp2233685_c0_seq1	563.445	608.533	473.596	2165.09	1097.37	475.116	455.313	464.177	gb|ELU00569.1| hypothetical protein CAPTEDRAFT_211593 [Capitella teleta]	1e-20	31	51	5
comp2233698_c0_seq1	2.31479	5.03019	2.52955	9.15265	13.1039	6.0418	5.88536	2.80355	NA	NA	NA	NA	NA
comp2233700_c0_seq1	123.162	100.575	112.915	17.4704	30.0571	85.2357	103.699	147.887	ref|XP_011439563.1| PREDICTED: FK506-binding protein 4-like, partial [Crassostrea gigas]	4e-11	35	65	10
comp2233700_c1_seq1	346.875	346.834	307.648	100.258	144.346	220.082	286.272	441.103	ref|XP_006818908.1| PREDICTED: poly(ADP-ribose) polymerase pme-5-like [Saccoglossus kowalevskii]	1e-66	42	62	4
comp2233710_c0_seq1	123.423	71.2846	72.7031	40.2067	60.1907	132.159	77.6497	57.8531	NA	NA	NA	NA	NA
comp2233720_c0_seq1	43.1672	62.3603	57.8946	22.7691	27.2213	34.3626	57.6118	61.0745	NA	NA	NA	NA	NA
comp2233759_c0_seq1	30.2258	26.7224	17.4529	6.00536	9.32549	25.5816	21.0519	17.1371	gb|ELT92684.1| hypothetical protein CAPTEDRAFT_228500 [Capitella teleta]	3e-23	30	48	9
comp2233761_c0_seq1	25.3932	84.1831	84.5362	7.89896	6.91611	26.5465	71.8234	65.0315	ref|XP_009066872.1| hypothetical protein LOTGIDRAFT_169984 [Lottia gigantea] gb|ESO82365.1| hypothetical protein LOTGIDRAFT_169984 [Lottia gigantea]	1e-10	40	52	8
comp2233803_c0_seq1	602.689	716.867	834.039	340.358	331.621	782.628	626.623	707.59	ref|XP_013387645.1| PREDICTED: spermine synthase-like [Lingula anatina]	7e-124	56	69	5
comp2233841_c0_seq1	4.33636	3.31278	1.90052	0	0	2.1531	3.54626	1.57893	NA	NA	NA	NA	NA
comp2233909_c0_seq2	149.919	418.589	369.172	138.461	70.0769	162.335	357.586	632.208	ref|XP_013412977.1| PREDICTED: uncharacterized protein LOC106175492 [Lingula anatina]	4e-16	34	50	7
comp2234032_c0_seq1	44.4224	23.5271	27.7644	2.44062	9.42951	24.9676	31.4447	34.5175	ref|XP_013420392.1| PREDICTED: RNA-directed DNA polymerase from mobile element jockey-like [Lingula anatina]	8e-30	61	83	0
comp2234049_c0_seq2	90.1401	69.1128	63.7526	48.7469	18.9025	87.7268	50.6898	59.953	ref|XP_009236183.1| PREDICTED: uncharacterized protein LOC100459223 [Pongo abelii] emb|CCO13681.1| alternative protein ASNSD1 [Homo sapiens]	2e-12	54	76	0
comp2234079_c0_seq2	504.422	615.231	578.124	476.581	252.441	501.933	643.672	643.312	gb|ELU07857.1| hypothetical protein CAPTEDRAFT_158105 [Capitella teleta]	0	66	81	2
comp2234125_c0_seq2	23.0164	12.7278	11.0181	2.85808	0	14.8415	8.37789	13.7309	NA	NA	NA	NA	NA
comp2234139_c0_seq1	22.4585	18.123	18.3398	89.3057	85.7843	29.0299	29.505	25.7012	NA	NA	NA	NA	NA
comp2234148_c0_seq2	13.1849	31.9352	34.6896	14.611	18.651	26.7933	39.8773	16.5684	NA	NA	NA	NA	NA
comp2234167_c0_seq3	492.676	675.282	584.906	1033.19	1095.03	541.28	525.203	507.266	NA	NA	NA	NA	NA
comp2234171_c0_seq1	83.4099	54.7753	51.4921	419.824	565.975	141.451	52.45	77.2899	emb|CCG06598.1| Putative uncharacterized protein, partial [Pararhodospirillum photometricum DSM 122]	1e-06	62	69	2
comp2234206_c0_seq1	41.0707	27.7542	23.4955	7.48282	18.4194	30.1031	27.9272	34.779	NA	NA	NA	NA	NA
comp2234217_c0_seq1	417.458	305.451	322.763	740.666	723.488	463.618	291.728	229.28	ref|XP_011443316.1| PREDICTED: uncharacterized protein C1orf194 homolog isoform X1 [Crassostrea gigas] gb|EKC30887.1| hypothetical protein CGI_10028568 [Crassostrea gigas]	3e-57	60	71	2
comp2234242_c0_seq1	32.2499	63.33	67.4188	1.18825	11.7349	21.2738	51.231	39.4522	ref|XP_013383868.1| PREDICTED: modulator of apoptosis 1-like [Lingula anatina]	4e-10	34	53	5
comp2234253_c0_seq3	30.2962	22.379	24.664	94.7679	129.314	27.4489	29.7021	18.0956	NA	NA	NA	NA	NA
comp2234282_c0_seq1	397.013	947.801	620.979	8132.45	4716.54	671.051	1075.34	894.104	ref|XP_013400508.1| PREDICTED: retinal dehydrogenase 2-like [Lingula anatina]	0	73	85	0
comp2234324_c0_seq2	4.90315	9.99583	18.2168	27133.4	8043.55	2.95798	20.71	157.751	ref|XP_013407933.1| PREDICTED: putative ferric-chelate reductase 1 [Lingula anatina]	6e-19	34	56	5
comp2234386_c0_seq2	11.098	7.82617	6.67067	5.105	1.96982	8.94942	4.04996	7.33354	gb|ACU83224.1| perlucin-like protein isoform A [Ruditapes philippinarum]	2e-08	29	47	5
comp2234405_c0_seq1	114.397	92.5026	96.6003	164.057	215.655	120.186	95.8675	90.0379	gb|ELU07821.1| hypothetical protein CAPTEDRAFT_221373 [Capitella teleta]	2e-30	37	53	9
comp2234410_c0_seq1	139.121	206.254	167.593	322.122	396.166	195.991	213.242	169.557	NA	NA	NA	NA	NA
comp2234451_c0_seq4	19.5269	40.6295	67.3966	336.403	288.109	24.7244	45.5252	42.3931	gb|ADZ36698.1| alternative oxidase [Urechis unicinctus]	9e-116	69	86	1
comp2234453_c0_seq2	372.14	627.081	1037.39	73.3061	41.2987	232.126	715.437	795.53	NA	NA	NA	NA	NA
comp2234463_c0_seq2	1.58895	2.34985	29.4262	22.3149	1982.57	4.5392	2.03802	8.31056	gb|AAD34267.1|AF084419_1 calmodulin mutant SYNCAM64A [synthetic construct]	4e-52	61	78	0
comp2234549_c0_seq1	20.0803	32.9703	31.2258	2.44062	7.95632	10.5701	42.9634	44.9783	ref|NP_001177274.1| glutathione peroxidase_like protein c precursor [Ciona intestinalis]	4e-53	46	63	4
comp2234598_c0_seq1	41.705	17.2471	27.5696	12.4269	5.81204	29.3193	19.8331	22.5565	NA	NA	NA	NA	NA
comp2234658_c0_seq1	11.8902	19.8392	19.7964	76.6772	38.258	24.9182	24.7312	16.8901	emb|CAJ38812.1| putative origin recognition complex subunit 3 protein [Platynereis dumerilii]	6e-34	40	63	0
comp2234664_c1_seq2	660.515	356.976	435.745	137.534	229.449	550.094	347.138	439.046	gb|ELU18837.1| hypothetical protein CAPTEDRAFT_210308 [Capitella teleta]	2e-18	56	70	2
comp2234671_c0_seq1	527.27	648.083	709.754	2296.71	2416.24	411.754	667.019	697.038	ref|XP_013786088.1| PREDICTED: max dimerization protein 1-like [Limulus polyphemus]	1e-50	63	73	6
comp2234677_c0_seq1	17.4696	17.2225	10.6725	3.14728	5.39265	13.7274	18.3886	8.52557	NA	NA	NA	NA	NA
comp2234772_c0_seq1	53.0098	42.2001	28.704	5.71615	14.1375	49.0067	60.9702	42.6775	NA	NA	NA	NA	NA
comp2234777_c0_seq2	7.60063	3.14676	4.5795	134.387	127.363	3.24713	5.65954	4.92284	ref|XP_009045787.1| hypothetical protein LOTGIDRAFT_137238 [Lottia gigantea] gb|ESP03557.1| hypothetical protein LOTGIDRAFT_137238 [Lottia gigantea]	3e-47	63	75	2
comp2234851_c0_seq3	31.5254	46.6101	40.6569	13.9698	14.8792	23.5813	26.5638	41.3393	NA	NA	NA	NA	NA
comp2234888_c0_seq2	7.01589	10.1407	10.9925	84.0056	69.4253	5.82873	10.1728	6.77673	NA	NA	NA	NA	NA
comp2234923_c0_seq1	17.3446	14.107	20.7049	1.25237	2.99665	12.8114	8.81501	12.7856	gb|AJH66211.1| sigma class glutathione S-transferase [Baylisascaris schroederi]	1e-35	48	64	4
comp2234980_c0_seq1	821.365	661.843	733.713	2008.22	1726.34	1216.1	836.366	923.447	NA	NA	NA	NA	NA
comp2234981_c0_seq2	5.55053	1.73495	3.92535	8.51011	20.1443	7.85523	2.08434	6.19422	ref|XP_011562076.1| PREDICTED: hemocytin-like [Plutella xylostella]	9e-35	37	51	5
comp2235003_c0_seq2	68.5893	81.9399	89.1578	512.946	214.91	42.1811	99.4976	126.385	NA	NA	NA	NA	NA
comp2235040_c0_seq1	135.294	137.335	134.036	329.918	320.821	106.734	121.89	142.73	ref|XP_011430102.1| PREDICTED: uncharacterized protein LOC105330198 [Crassostrea gigas] ref|XP_011430103.1| PREDICTED: uncharacterized protein LOC105330198 [Crassostrea gigas] ref|XP_011430104.1| PRED	2e-07	48	66	0
comp2235052_c0_seq1	6.98123	12.0275	1.71781	1460.32	2524.32	6.63376	6.57142	3.84279	ref|XP_001626907.1| predicted protein [Nematostella vectensis] gb|EDO34807.1| predicted protein, partial [Nematostella vectensis]	3e-42	40	60	9
comp2235060_c1_seq1	35.216	30.6845	27.3694	5.17045	16.3524	27.8301	27.6492	30.4225	NA	NA	NA	NA	NA
comp2235108_c0_seq1	64.2783	121.737	84.6827	22.0912	14.822	35.2364	129.536	153.394	ref|XP_004338625.1| DUF614 family protein [Acanthamoeba castellanii str. Neff] gb|ELR16612.1| DUF614 family protein [Acanthamoeba castellanii str. Neff]	4e-07	40	65	0
comp2235151_c0_seq1	58.2132	56.34	42.7228	24.7555	7.09737	76.1077	51.929	34.1339	NA	NA	NA	NA	NA
comp2235153_c0_seq1	16.4091	18.8255	12.1761	44.0254	32.3421	52.3707	10.497	13.1409	NA	NA	NA	NA	NA
comp2235168_c0_seq1	4.23375	10.7285	6.09675	21.6122	27.4226	10.878	12.538	6.92063	NA	NA	NA	NA	NA
comp2235205_c0_seq1	17.6221	14.1016	11.4351	91.2306	70.2311	20.4393	14.6424	10.6656	NA	NA	NA	NA	NA
comp2235212_c0_seq1	30.8711	128.215	87.6428	92.8756	110.493	26.4606	152.162	238.336	NA	NA	NA	NA	NA
comp2235289_c1_seq1	229.552	181.511	237.925	145.8	124.891	30.8782	233.83	479.916	NA	NA	NA	NA	NA
comp2235301_c0_seq1	80.6927	122.117	112.288	48.1986	55.56	108.465	122.188	118.322	ref|XP_009050216.1| hypothetical protein LOTGIDRAFT_201415 [Lottia gigantea] gb|ESO99105.1| hypothetical protein LOTGIDRAFT_201415 [Lottia gigantea]	1e-130	58	77	1
comp2235302_c0_seq1	90.1289	144.258	148.612	308.947	298.058	112.847	140.84	134.878	gb|ELT89146.1| hypothetical protein CAPTEDRAFT_194485 [Capitella teleta]	2e-76	38	57	2
comp2235322_c0_seq1	101.284	244.321	362.575	15.4446	23.953	94.6492	389.647	262.002	ref|XP_013406844.1| PREDICTED: uncharacterized protein LOC106171183 [Lingula anatina] ref|XP_013406845.1| PREDICTED: uncharacterized protein LOC106171183 [Lingula anatina]	3e-129	44	69	1
comp2235330_c0_seq1	5.22045	6.66583	4.43205	15.5755	54.0068	4.21802	4.66657	3.47958	NA	NA	NA	NA	NA
comp2235332_c0_seq1	80.7128	105.91	102.155	369.613	263.026	85.9158	98.6267	91.171	NA	NA	NA	NA	NA
comp2235392_c0_seq1	594.052	675.832	688.856	2083.84	1290.96	650.961	576.353	614.397	ref|XP_009009921.1| hypothetical protein HELRODRAFT_159834 [Helobdella robusta] gb|ESO13201.1| hypothetical protein HELRODRAFT_159834 [Helobdella robusta]	2e-10	32	50	8
comp2235400_c0_seq1	238.177	137.983	121.092	156.576	187.213	282.759	137.757	95.2242	NA	NA	NA	NA	NA
comp2235404_c0_seq1	89.6549	61.6961	51.7932	38.0514	30.0569	74.6729	67.8019	71.1105	NA	NA	NA	NA	NA
comp2235412_c1_seq2	156.897	336.694	360.921	909.667	1071.49	145.648	218.664	229.108	ref|XP_009065133.1| hypothetical protein LOTGIDRAFT_210962 [Lottia gigantea] gb|ESO84005.1| hypothetical protein LOTGIDRAFT_210962 [Lottia gigantea]	7e-107	45	53	10
comp2235459_c0_seq2	35.9127	28.6885	29.3184	58.8915	49.0498	40.224	27.2845	34.7167	NA	NA	NA	NA	NA
comp2235488_c0_seq1	62.3608	81.4593	68.6923	3.9822	13.1947	67.5125	69.8545	40.6257	NA	NA	NA	NA	NA
comp2235543_c0_seq2	2.84959	2.77782	4.09792	32.593	19.2448	6.95244	3.34069	2.44034	NA	NA	NA	NA	NA
comp2235557_c0_seq3	1143.79	1670.85	1650.22	834.344	655.547	1171.41	1214.25	1503.05	ref|XP_009050140.1| hypothetical protein LOTGIDRAFT_173822 [Lottia gigantea] gb|ESO99180.1| hypothetical protein LOTGIDRAFT_173822 [Lottia gigantea]	3e-65	33	48	3
comp2235567_c0_seq1	10.082	5.28878	7.71669	41.234	31.3991	11.4265	12.6565	10.2817	NA	NA	NA	NA	NA
comp2235658_c0_seq1	1257.15	1394.91	1436.97	1980.67	2010.74	1403.56	1386.84	1303.81	ref|XP_009054592.1| hypothetical protein LOTGIDRAFT_232281 [Lottia gigantea] gb|ESO94855.1| hypothetical protein LOTGIDRAFT_232281 [Lottia gigantea]	0	58	72	8
comp2235681_c0_seq1	540.362	861.698	865.419	1748.21	1182.11	521.679	777.331	835.449	gb|ELU04229.1| hypothetical protein CAPTEDRAFT_20984 [Capitella teleta]	7e-43	60	79	0
comp2235690_c0_seq1	10.9389	25.6432	23.7765	5.93992	7.09737	18.1605	23.4083	20.4099	ref|XP_013413560.1| PREDICTED: protein fem-1 homolog B-like [Lingula anatina]	3e-05	38	54	13
comp2235701_c1_seq1	5.88986	18.5528	11.6533	0	0.600649	6.467	18.0323	19.853	ref|WP_044454921.1| sulfotransferase [Pandoraea vervacti]	7e-15	32	55	1
comp2235755_c0_seq2	7.10262	2.9995	3.43782	10.0517	24.5034	4.31922	3.0223	0.94143	NA	NA	NA	NA	NA
comp2235766_c0_seq1	75.3193	126.533	91.171	14.4814	3.5973	107.46	254.539	160.526	ref|XP_006816926.1| PREDICTED: bursicon-like [Saccoglossus kowalevskii]	1e-12	41	50	8
comp2235779_c0_seq1	17.6467	120.283	77.7472	23.1525	28.1306	49.4788	119.134	97.7475	gb|AEI70677.1| GST-sigma [Perinereis nuntia]	6e-46	49	68	1
comp2235788_c0_seq1	52.2445	64.2954	38.8197	4.17457	12.9362	44.7513	49.8246	47.5457	NA	NA	NA	NA	NA
comp2235819_c0_seq2	850.425	984.046	893.206	1492.51	2353.83	970.403	841.107	981.005	NA	NA	NA	NA	NA
comp2235826_c0_seq2	35.9622	19.4543	16.944	113.228	68.8688	23.8944	25.5446	28.9605	NA	NA	NA	NA	NA
comp2235851_c0_seq1	20.9814	14.1738	8.80701	1.18825	4.1141	16.6421	10.5172	15.596	NA	NA	NA	NA	NA
comp2235913_c0_seq4	131.491	68.9138	70.3388	219.741	203.902	144.518	59.881	60.1196	ref|XP_006374229.1| calmodulin-like protein 6a [Populus trichocarpa] ref|XP_011035530.1| PREDICTED: calmodulin-like [Populus euphratica] gb|ERP52026.1| calmodulin-like protein 6a [Populus trichocarpa]	5e-23	43	63	2
comp2235924_c0_seq2	76.6941	69.1245	65.6026	28.5166	39.3824	47.7621	75.6005	77.4404	NA	NA	NA	NA	NA
comp2235947_c0_seq2	50.4867	37.1376	24.9754	3.85395	7.62756	30.751	33.2248	20.4655	NA	NA	NA	NA	NA
comp2235954_c0_seq1	59.4353	58.4912	66.6551	150.122	83.885	32.557	75.1783	72.1478	NA	NA	NA	NA	NA
comp2236033_c0_seq1	2088.29	2641.43	2631.54	1967.99	1659.27	2629.03	2648.98	2591.77	ref|XP_009018356.1| hypothetical protein HELRODRAFT_191960 [Helobdella robusta] gb|ESO03799.1| hypothetical protein HELRODRAFT_191960 [Helobdella robusta]	0	92	97	0
comp2236050_c0_seq1	10.4265	9.94448	17.5933	24.9205	31.0131	11.2233	11.6983	16.1341	ref|XP_013076163.1| PREDICTED: uncharacterized protein LOC106062437 [Biomphalaria glabrata]	3e-28	35	51	1
comp2236053_c0_seq4	24.8778	17.9432	16.8457	13.1348	9.59719	11.8619	39.1419	43.9658	NA	NA	NA	NA	NA
comp2236069_c0_seq3	136.614	147.891	148.075	70.096	72.8053	131.117	153.861	125.347	NA	NA	NA	NA	NA
comp2236094_c0_seq1	36.0984	223.689	151.732	18.1757	10.0166	35.1816	109.1	112.941	NA	NA	NA	NA	NA
comp2236094_c1_seq1	45.8525	161.798	100.605	16.3122	2.40259	33.8179	102.978	83.4601	NA	NA	NA	NA	NA
comp2236155_c0_seq1	64.907	135.342	167.935	1179.9	1261.63	84.9585	169.118	144.972	NA	NA	NA	NA	NA
comp2236190_c0_seq1	5.02808	55.0677	1.28538	78.1914	0	10.738	29.551	2.83319	ref|XP_003726943.2| PREDICTED: myoblast determination protein 1 homolog 2-like [Strongylocentrotus purpuratus]	5e-06	44	63	0
comp2236208_c0_seq1	80.1308	95.1897	95.8676	28.8386	46.7377	85.9835	105.835	97.9385	NA	NA	NA	NA	NA
comp2236218_c0_seq2	15.374	20.8558	36.5438	0.834915	1.62748	5.04957	37.8161	16.9781	ref|XP_001850608.1| frazzled protein [Culex quinquefasciatus] gb|EDS32362.1| frazzled protein [Culex quinquefasciatus]	7e-05	25	41	21
comp2236259_c0_seq1	32805.6	34285.8	35408.8	8216.37	5804.05	25656.5	38065	37817.8	ref|XP_012618327.1| PREDICTED: dynein light chain 2, cytoplasmic isoform X1 [Microcebus murinus]	3e-59	78	84	0
comp2236285_c0_seq1	364.546	494.554	444.448	313.153	275.322	385.35	380.685	437.853	ref|XP_013401216.1| PREDICTED: gametogenetin-binding protein 2-like [Lingula anatina]	0	53	69	9
comp2236289_c0_seq1	6273.37	9126.56	8960.32	12473.6	10664.8	7437.79	8866.66	8674.45	gb|ELU08438.1| hypothetical protein CAPTEDRAFT_20777 [Capitella teleta]	0	91	96	0
comp2236304_c0_seq1	14.6565	15.3842	12.1245	61.4276	46.6273	14.6406	15.2619	14.218	gb|ELU01010.1| hypothetical protein CAPTEDRAFT_195563 [Capitella teleta]	7e-09	39	59	4
comp2236313_c0_seq1	6.17375	0.914361	2.17977	9.08852	24.4327	5.90782	5.55238	1.37214	NA	NA	NA	NA	NA
comp2236331_c0_seq1	32.4823	34.1224	24.299	11.2386	10.708	45.9314	35.2428	19.5188	ref|XP_004607817.1| PREDICTED: protein N-terminal glutamine amidohydrolase [Sorex araneus]	2e-50	53	71	2
comp2236360_c0_seq3	23.3171	19.976	15.0439	57.9624	49.4964	24.1724	20.768	17.8391	NA	NA	NA	NA	NA
comp2236375_c0_seq1	258.968	260.332	266.704	31.7607	107.319	178.141	326.254	287.306	NA	NA	NA	NA	NA
comp2236391_c0_seq3	161.488	231.378	184.977	356.403	299.036	143.107	274.739	168.185	ref|XP_001634963.1| predicted protein [Nematostella vectensis] gb|EDO42900.1| predicted protein, partial [Nematostella vectensis]	2e-167	59	73	7
comp2236509_c0_seq6	548.061	611.767	833.433	283.282	220.233	490.853	719.824	753.404	gb|ELT98426.1| hypothetical protein CAPTEDRAFT_224679 [Capitella teleta]	8e-98	44	66	2
comp2236520_c0_seq2	45.9204	51.0943	42.8103	23.5045	14.5704	53.4702	43.6898	27.6973	NA	NA	NA	NA	NA
comp2236530_c0_seq1	339.585	494.381	462.739	91.1286	159.744	423.001	392.873	352.895	NA	NA	NA	NA	NA
comp2236614_c0_seq1	412.845	997.148	1430.67	221.901	333.399	281.676	1063.5	1341.63	gb|ELT89874.1| hypothetical protein CAPTEDRAFT_223748 [Capitella teleta]	8e-85	53	66	3
comp2236624_c0_seq1	53.6327	39.1938	40.0487	115.472	97.8612	56.0223	42.1297	41.4928	gb|ELT88702.1| hypothetical protein CAPTEDRAFT_224172 [Capitella teleta]	5e-81	54	71	3
comp2236625_c0_seq1	14485.1	11676.1	11207.4	9768.46	5924.96	14395.4	12448.8	11497.6	emb|CAJ17183.1| ribosomal protein S11e [Eucinetus sp. APV-2005]	2e-83	82	93	0
comp2236689_c0_seq1	5.66889	34.8859	60.667	23.0216	4.5335	10.7821	53.0519	44.3902	NA	NA	NA	NA	NA
comp2236696_c0_seq1	15.4941	15.6566	20.3404	36.7061	36.9195	9.48113	17.0074	19.2037	gb|ELT92923.1| hypothetical protein CAPTEDRAFT_66252, partial [Capitella teleta]	8e-31	47	67	3
comp2236712_c0_seq2	85.6713	94.7108	65.6661	16.8906	21.6812	93.4359	100.602	63.3538	NA	NA	NA	NA	NA
comp2236727_c0_seq1	21.8523	43.3835	45.7511	9.92344	11.8826	22.1549	35.8332	37.3524	NA	NA	NA	NA	NA
comp2236834_c0_seq1	491.197	681.743	754.584	1084.53	1120.65	515.133	647.683	606.252	ref|XP_013415686.1| PREDICTED: TBC1 domain family member 14-like isoform X1 [Lingula anatina]	0	64	79	6
comp2236889_c0_seq1	29.161	17.4998	17.1388	371.365	270.896	24.1291	26.9198	16.6655	ref|WP_020534160.1| hypothetical protein [Lewinella cohaerens]	1e-17	50	63	0
comp2236891_c0_seq1	317.86	341.878	311.531	63.9991	33.3891	240.343	287.994	338.485	NA	NA	NA	NA	NA
comp2236910_c0_seq2	104.328	47.7336	56.4481	103.52	52.7649	107.134	46.5329	37.7462	ref|XP_013781952.1| PREDICTED: LOW QUALITY PROTEIN: alpha-amylase-like [Limulus polyphemus]	2e-73	52	68	7
comp2236959_c0_seq1	39.8666	70.6349	38.4036	5977.36	2717.29	51.4249	56.0456	31.6402	ref|XP_007573889.1| PREDICTED: gamma-interferon-inducible lysosomal thiol reductase-like [Poecilia formosa] ref|XP_014834366.1| PREDICTED: gamma-interferon-inducible lysosomal thiol reductase-like [Po	2e-08	59	72	0
comp2236987_c0_seq1	716.317	858.306	938.302	318.334	309.357	650.646	771.907	641.011	NA	NA	NA	NA	NA
comp2237006_c0_seq2	81.9617	101.116	84.1417	1.54158	2.22813	71.3872	139.104	85.1721	NA	NA	NA	NA	NA
comp2237007_c0_seq2	74.7894	103.821	82.6795	357.869	209.083	75.341	83.0259	79.2456	NA	NA	NA	NA	NA
comp2237065_c0_seq1	145.112	92.2794	97.3579	369.495	256.19	317.683	108.177	83.1245	gb|ELT96776.1| hypothetical protein CAPTEDRAFT_124120, partial [Capitella teleta]	3e-89	47	64	2
comp2237121_c0_seq1	323.517	419.214	468.477	1831.2	1829.75	344.059	400.912	388.286	NA	NA	NA	NA	NA
comp2237124_c0_seq1	26.4048	18.0876	23.6625	102.367	64.6198	28.5989	29.6005	41.5498	NA	NA	NA	NA	NA
comp2237126_c0_seq1	273.659	649.702	472.086	175.942	176.363	277.97	511.071	540.77	NA	NA	NA	NA	NA
comp2237127_c0_seq1	43.8855	30.0014	36.0669	4.88124	15.0805	53.2056	40.4479	54.7383	NA	NA	NA	NA	NA
comp2237146_c0_seq1	119.728	104.411	88.7293	138.891	175.908	134.582	105.23	104.817	NA	NA	NA	NA	NA
comp2237170_c0_seq1	27.26	33.4144	40.6063	7.32186	10.9664	23.8027	49.5235	37.7932	NA	NA	NA	NA	NA
comp2237173_c0_seq6	1788.26	1854.4	1801.44	574.402	454.948	705.333	1508.97	1813.54	NA	NA	NA	NA	NA
comp2237192_c0_seq1	48.9304	62.5585	48.4094	197.464	168.045	83.3189	71.6604	46.2342	NA	NA	NA	NA	NA
comp2237222_c0_seq1	169.625	142.954	144.667	344.582	329.454	188.632	122.243	188.696	ref|XP_011444615.1| PREDICTED: lipopolysaccharide-induced tumor necrosis factor-alpha factor homolog [Crassostrea gigas] gb|EKC36235.1| Lipopolysaccharide-induced tumor necrosis factor-alpha factor-li	5e-10	45	61	6
comp2237241_c0_seq1	112.678	112.675	115.854	36.1578	46.9731	82.8136	119.636	117.003	gb|ELT96394.1| hypothetical protein CAPTEDRAFT_188177 [Capitella teleta]	8e-10	37	65	0
comp2237248_c1_seq1	61.0726	43.191	40.5221	21.8687	29.9797	61.0457	38.1405	46.1779	NA	NA	NA	NA	NA
comp2237250_c0_seq1	27.9096	30.1349	31.7797	7.12948	6.83887	16.2757	26.7954	21.269	NA	NA	NA	NA	NA
comp2237264_c0_seq1	22.7345	36.711	15.3267	0	0	38.4856	42.8825	25.2928	NA	NA	NA	NA	NA
comp2237274_c0_seq1	22.7072	48.2788	57.0873	6.35869	14.453	49.5026	32.1913	27.8738	ref|XP_013076668.1| PREDICTED: LOW QUALITY PROTEIN: syntaxin-2-like [Biomphalaria glabrata]	8e-07	24	44	8
comp2237292_c0_seq1	22.5663	10.3558	6.65127	6.35738	5.21818	5.60672	8.2562	4.21422	ref|XP_013120980.1| PREDICTED: splicing factor 3A subunit 2-like [Oreochromis niloticus]	1e-12	33	53	6
comp2237333_c0_seq1	22.4241	63.1145	53.0263	22.222	17.2114	26.188	24.9165	19.068	NA	NA	NA	NA	NA
comp2237339_c0_seq1	7.54625	7.31826	5.54441	37.1877	50.9428	10.1553	11.2758	7.2453	NA	NA	NA	NA	NA
comp2237345_c0_seq1	136.707	177.397	136.203	53.2695	31.5872	83.4293	105.56	80.1501	NA	NA	NA	NA	NA
comp2237365_c0_seq1	4.49158	6.30304	5.75116	32.0133	83.6005	3.41925	5.09221	2.49962	ref|XP_006823845.1| PREDICTED: gypsy retrotransposon integrase-like protein 1-like [Saccoglossus kowalevskii]	1e-56	52	72	5
comp2237367_c0_seq1	26.4441	67.8073	70.5068	20.1334	18.6508	25.5344	82.0184	67.8029	ref|XP_011452175.1| PREDICTED: uncharacterized protein LOC105345655 isoform X3 [Crassostrea gigas]	1e-16	28	42	10
comp2237419_c0_seq1	106.842	82.8555	109.495	19.5563	12.8455	127.354	89.9473	76.4456	NA	NA	NA	NA	NA
comp2237429_c0_seq1	41.5354	176.734	161.145	29.3816	24.9224	55.9632	173.097	169.875	NA	NA	NA	NA	NA
comp2237431_c0_seq3	30.6029	88.2697	69.184	90.8512	85.9392	66.5508	130.801	101.033	NA	NA	NA	NA	NA
comp2237444_c0_seq1	14.4362	4.6865	8.30429	17.3408	55.3825	10.504	8.21283	5.85242	NA	NA	NA	NA	NA
comp2237453_c0_seq1	7.86319	10.1788	10.2341	24.0214	32.4193	8.64173	10.1959	8.42844	NA	NA	NA	NA	NA
comp2237456_c0_seq1	129.909	94.6063	90.4906	37.0542	36.3153	142.117	112.546	92.9307	ref|XP_013420759.1| PREDICTED: glutamyl-tRNA(Gln) amidotransferase subunit C, mitochondrial-like [Lingula anatina]	3e-47	64	79	0
comp2237516_c0_seq1	424.065	319.851	266.484	852.383	760.029	264.204	350.297	306.813	NA	NA	NA	NA	NA
comp2237558_c0_seq1	44.3357	37.1886	27.302	16.5713	13.245	32.778	28.4686	39.9195	NA	NA	NA	NA	NA
comp2237623_c0_seq2	6.89923	15.4556	11.5292	0.77079	1.02683	7.83685	12.1818	12.8228	NA	NA	NA	NA	NA
comp2237681_c0_seq1	100.63	73.2129	73.2633	62.2612	52.325	109.128	84.0103	78.827	gb|ELU14341.1| hypothetical protein CAPTEDRAFT_106761 [Capitella teleta]	3e-50	75	87	0
comp2237821_c0_seq1	23.9779	31.078	34.3055	50.193	85.4565	20.0179	35.4425	22.0392	NA	NA	NA	NA	NA
comp2237870_c0_seq1	8.70124	10.9321	16.4159	35.8372	19.077	7.87122	31.1636	11.9607	ref|WP_031076043.1| serine protease [Streptomyces sp. NRRL S-118]	9e-43	47	62	5
comp2237892_c0_seq1	9.48724	22.7332	30.7779	6.29325	2.73155	8.51025	17.6792	14.8153	NA	NA	NA	NA	NA
comp2237921_c0_seq1	66.1929	22.8079	30.4711	6.9044	13.6141	15.6797	50.2881	32.5332	ref|XP_002613230.1| hypothetical protein BRAFLDRAFT_73168 [Branchiostoma floridae] gb|EEN69239.1| hypothetical protein BRAFLDRAFT_73168 [Branchiostoma floridae]	1e-12	34	58	1
comp2237937_c0_seq2	93.0206	92.0425	86.7757	33.301	43.238	141.525	77.4592	64.3453	NA	NA	NA	NA	NA
comp2237963_c0_seq1	27.2968	89.6201	82.1221	19.7147	16.1005	41.7939	67.3966	84.6265	NA	NA	NA	NA	NA
comp2238012_c0_seq1	37.6736	22.7443	34.5074	101.053	102.818	23.7393	26.3611	35.0135	NA	NA	NA	NA	NA
comp2238068_c1_seq2	61.5641	37.5198	28.3559	3.62887	8.6542	54.8312	34.3659	38.6026	NA	NA	NA	NA	NA
comp2238086_c0_seq1	662.642	1068.67	1041.26	633.113	534.364	836.635	947.57	646.513	ref|XP_007233432.1| PREDICTED: src kinase-associated phosphoprotein 2 isoform X2 [Astyanax mexicanus]	1e-19	27	41	28
comp2238146_c0_seq2	20.3603	6.78052	11.6374	2.08729	5.99329	14.5701	7.41968	11.6959	gb|KFZ53269.1| Cation-independent mannose-6-phosphate receptor, partial [Caprimulgus carolinensis]	2e-07	55	64	0
comp2238180_c0_seq2	55.0064	55.5685	83.0044	16.184	28.7211	50.492	47.045	51.6243	NA	NA	NA	NA	NA
comp2238188_c0_seq1	449.887	1165.61	917.965	2591.39	1634.94	458.368	1313.45	1256.94	NA	NA	NA	NA	NA
comp2238294_c0_seq3	13.3542	31.4354	32.3198	0	2.57047	13.1633	32.3332	42.887	NA	NA	NA	NA	NA
comp2238344_c0_seq1	25.8895	47.238	44.0363	4.81711	11.567	29.4624	34.5335	40.6877	NA	NA	NA	NA	NA
comp2238374_c0_seq1	25.7313	39.3079	38.4327	7.06404	8.31865	30.9224	26.9314	39.4703	NA	NA	NA	NA	NA
comp2238422_c0_seq1	59.0566	44.7221	31.1564	7.61107	12.2315	51.0261	48.1658	44.2832	NA	NA	NA	NA	NA
comp2238451_c0_seq1	13.8257	10.984	7.47073	42.8096	33.1706	13.7233	5.65668	8.4663	gb|EFX71596.1| endo-beta-1,4-mannanase [Daphnia pulex]	5e-108	47	63	1
comp2238516_c0_seq1	14.8874	13.2435	19.3087	2.02316	5.81883	12.5497	15.3517	8.55883	NA	NA	NA	NA	NA
comp2238583_c0_seq1	222.816	300.163	272.626	72.3836	50.3218	240.053	190.575	214.997	NA	NA	NA	NA	NA
comp2238602_c0_seq1	71.0607	120.105	148.86	340.558	429.397	63.7287	93.6473	72.647	ref|WP_020534160.1| hypothetical protein [Lewinella cohaerens]	5e-76	51	62	6
comp2238617_c0_seq1	93.6016	104.999	97.3482	23.6027	39.1512	91.0782	104.3	107.979	ref|XP_003488068.1| PREDICTED: U3 small nucleolar ribonucleoprotein protein MPP10 [Bombus impatiens]	1e-10	36	60	3
comp2238675_c0_seq2	4.05585	15.0743	18.1492	15.3818	12.1409	15.9706	18.1105	13.3566	ref|XP_013419993.1| PREDICTED: uncharacterized protein LOC106180531 [Lingula anatina]	5e-43	46	67	1
comp2238682_c0_seq2	9.5424	5.01359	4.32207	1093.3	803.613	4.14349	4.98792	8.61744	ref|XP_009050823.1| hypothetical protein LOTGIDRAFT_201667 [Lottia gigantea] gb|ESO98477.1| hypothetical protein LOTGIDRAFT_201667 [Lottia gigantea]	2e-36	60	74	2
comp2238688_c0_seq1	6.76088	11.8697	23.8395	0	3.50667	13.9023	8.76286	15.9056	NA	NA	NA	NA	NA
comp2238725_c0_seq1	19.2671	21.8526	34.4838	5.2987	10.8691	11.6739	10.5809	18.4513	ref|XP_001286752.1| hypothetical protein [Trichomonas vaginalis G3] gb|EAX73822.1| conserved hypothetical protein, partial [Trichomonas vaginalis G3]	8e-06	46	63	4
comp2238730_c0_seq1	418.587	429.83	507.215	236.309	270.804	369.858	615.884	500.887	NA	NA	NA	NA	NA
comp2238758_c0_seq1	32.3555	17.2237	13.4758	6.35738	457.396	32.5853	14.3125	14.2802	NA	NA	NA	NA	NA
comp2238786_c0_seq4	807.666	878.738	833.799	378.307	420.945	1020.81	838.996	811.1	ref|XP_012942792.1| PREDICTED: serine/arginine-rich splicing factor 10-like isoform X2 [Aplysia californica]	1e-13	71	87	0
comp2238789_c0_seq1	29.1787	37.9787	30.2871	194.539	244.95	60.2765	35.5898	40.4565	gb|ELT93128.1| hypothetical protein CAPTEDRAFT_195780 [Capitella teleta]	2e-18	34	53	16
comp2238873_c0_seq1	22.6076	8.63632	7.64572	6.35738	5.7282	14.3341	17.1349	9.51671	emb|CDR01105.1| unnamed protein product [Oncorhynchus mykiss]	1e-13	33	47	15
comp2238888_c1_seq2	2028.14	2844.24	2649.76	1504.37	1513.28	2108.29	2188.76	2343.83	ref|XP_013393702.1| PREDICTED: actin-related protein 3 [Lingula anatina]	0	88	94	0
comp2238915_c0_seq1	6.39917	8.19295	10.7298	1.18825	1.2013	6.20356	5.49744	6.19489	NA	NA	NA	NA	NA
comp2238985_c0_seq1	220.473	375.238	438.463	4.88124	15.5837	174.56	220.531	309.936	gb|ABU62818.1| acetylcholine binding protein 2 [Haliotis discus hannai]	5e-38	40	58	3
comp2239036_c0_seq1	98.5733	94.0337	84.8056	9.05581	32.8927	126.806	112.517	54.1861	NA	NA	NA	NA	NA
comp2239040_c0_seq1	87.25	188.86	183.555	11.7856	23.5334	80.868	170.409	183.991	NA	NA	NA	NA	NA
comp2239046_c0_seq2	55.8821	151.464	153.647	60.4317	30.8186	103.621	156.779	206.827	NA	NA	NA	NA	NA
comp2239053_c0_seq1	8.03769	32.3887	24.5289	42.0349	28.1839	16.3535	35.668	52.81	gb|ELU15288.1| hypothetical protein CAPTEDRAFT_104399 [Capitella teleta]	1e-51	51	71	0
comp2239091_c1_seq1	59.2294	62.4881	66.6295	5.45834	9.67443	50.8331	59.259	57.9097	NA	NA	NA	NA	NA
comp2239172_c0_seq2	129.518	200.921	179.628	72.1886	64.2986	192.521	203.141	207.291	ref|XP_012672674.1| PREDICTED: protein Lines homolog [Clupea harengus]	8e-18	34	52	7
comp2239188_c1_seq1	34.8076	17.2394	17.3255	6.96853	13.4462	30.0322	23.5066	19.043	NA	NA	NA	NA	NA
comp2239213_c0_seq1	33.0796	58.3302	70.9356	6.84028	8.56376	60.5086	52.0443	20.288	ref|XP_013411142.1| PREDICTED: sacsin-like [Lingula anatina]	1e-12	23	51	8
comp2239270_c0_seq3	153.343	196.551	185.442	58.3549	57.9835	330.158	215.472	55.1035	NA	NA	NA	NA	NA
comp2239331_c0_seq1	141.616	97.8959	114.476	417.029	387.11	126.012	124.437	100.685	gb|ELT88039.1| hypothetical protein CAPTEDRAFT_72731, partial [Capitella teleta]	5e-99	37	57	3
comp2239374_c1_seq2	72.336	104.41	180.947	44.9597	44.4057	65.0374	85.1047	113.593	gb|ELT89296.1| hypothetical protein CAPTEDRAFT_182211 [Capitella teleta]	1e-164	50	67	5
comp2239379_c0_seq1	9.02956	9.82308	19.2362	1.6057	5.39265	14.6368	9.81659	18.6953	NA	NA	NA	NA	NA
comp2239384_c0_seq1	205.138	232.65	231.631	121.41	127.194	214.321	201.604	192.89	ref|XP_009064223.1| hypothetical protein LOTGIDRAFT_204649 [Lottia gigantea] gb|ESO85081.1| hypothetical protein LOTGIDRAFT_204649 [Lottia gigantea]	5e-42	40	61	5
comp2239388_c0_seq2	378.638	644.965	918.168	363.596	364.991	414.508	650.013	636.849	ref|XP_013403349.1| PREDICTED: ankyrin repeat domain-containing protein 29-like [Lingula anatina]	6e-163	75	89	0
comp2239400_c0_seq1	71.2348	56.25	50.0276	17.5018	31.5369	89.8423	58.11	81.4244	NA	NA	NA	NA	NA
comp2239440_c0_seq1	182.684	285.382	222.993	135.357	290.193	62.0345	240.918	294.518	NA	NA	NA	NA	NA
comp2239441_c0_seq1	161.321	202.422	157.852	71.4819	94.9022	155.175	162.138	132.857	gb|ELU07109.1| hypothetical protein CAPTEDRAFT_189004 [Capitella teleta]	1e-13	44	60	1
comp2239480_c0_seq1	4.45302	1.94124	1.87694	70.5122	30.6545	0.606248	1.92511	2.67677	NA	NA	NA	NA	NA
comp2239483_c0_seq1	6.8445	8.92254	11.1345	0.834915	0.600649	7.0315	17.853	19.1201	NA	NA	NA	NA	NA
comp2239485_c0_seq1	28.1744	9.74807	10.4959	0	7.28522	10.8236	4.30472	8.70568	gb|KOF99022.1| hypothetical protein OCBIM_22020958mg, partial [Octopus bimaculoides]	2e-41	46	61	0
comp2239495_c0_seq1	3.93093	14.3085	10.9811	0.77079	1.45301	7.69017	4.64632	5.25574	NA	NA	NA	NA	NA
comp2239524_c0_seq2	14.6905	9.8341	13.2353	72.1912	115.92	6.44847	10.2103	8.95101	NA	NA	NA	NA	NA
comp2239531_c0_seq1	172.161	144.393	135.864	1910.73	1676.04	194.226	118.714	172.948	gb|ELU03247.1| hypothetical protein CAPTEDRAFT_214280 [Capitella teleta]	2e-25	59	78	0
comp2239542_c0_seq1	25.0504	14.9526	12.7793	2.08729	2.14429	20.1494	10.2711	8.5967	gb|KOF63765.1| hypothetical protein OCBIM_22018428mg, partial [Octopus bimaculoides]	1e-28	42	63	1
comp2239558_c0_seq1	14.883	15.3667	23.8099	133.012	218.752	12.6026	13.9534	15.3142	NA	NA	NA	NA	NA
comp2239573_c0_seq1	26.3732	45.5442	29.171	183.68	167.285	30.9634	36.5484	36.3974	NA	NA	NA	NA	NA
comp2239593_c0_seq2	115.889	123.989	115.624	21.8046	30.9933	63.4607	58.6826	86.4845	NA	NA	NA	NA	NA
comp2239600_c0_seq1	35.4057	79.014	63.9032	13.3586	13.6207	54.7229	88.4423	88.0299	gb|AIT11917.1| arylalkylamine N-acetyltransferase [Platynereis dumerilii]	2e-114	99	99	0
comp2239613_c0_seq2	255.694	234.729	381.792	43.0635	37.9294	222.692	156.038	233.911	gb|ELU01125.1| hypothetical protein CAPTEDRAFT_167905 [Capitella teleta]	2e-145	54	70	3
comp2239647_c0_seq1	270.122	135.265	125.696	365.23	280.041	268.276	141.894	108.638	NA	NA	NA	NA	NA
comp2239673_c0_seq1	18.8693	23.6525	20.5268	3.21141	2.396	25.9302	15.4761	13.6335	NA	NA	NA	NA	NA
comp2239691_c0_seq1	14092.2	23699.3	30940.5	1964.84	1128.09	11374.7	19295.2	24707.3	sp|P04571.1|SCP_HEDDI RecName: Full=Sarcoplasmic calcium-binding protein; Short=SCP pdb|2SCP|A Chain A, Structure Of A Sarcoplasmic Calcium-Binding Protein From Nereis Diversicolor Refined At 2.0 Angs	3e-88	78	86	0
comp2239692_c0_seq1	139.494	95.3201	91.8173	8.15677	14.8222	134.683	64.7883	68.6696	ref|XP_002608095.1| hypothetical protein BRAFLDRAFT_91427 [Branchiostoma floridae] gb|EEN64105.1| hypothetical protein BRAFLDRAFT_91427 [Branchiostoma floridae]	2e-46	44	62	0
comp2239693_c0_seq2	20.2245	17.2763	19.1317	6.29325	4.28178	15.5287	34.9852	20.4099	NA	NA	NA	NA	NA
comp2239700_c0_seq2	30.1013	33.9044	37.9326	22.3804	4.45625	46.5036	27.3423	24.3956	ref|XP_012671331.1| PREDICTED: guanine nucleotide-binding protein subunit beta-like protein 1 [Clupea harengus]	1e-34	37	55	5
comp2239709_c0_seq1	10.3783	12.0496	8.63377	157.545	208.21	2.10226	6.9218	22.3514	gb|ELT98300.1| hypothetical protein CAPTEDRAFT_221260 [Capitella teleta]	5e-115	48	66	4
comp2239730_c1_seq1	16.2798	10.7402	6.48397	1.95904	1.54364	22.3887	3.59841	4.84282	NA	NA	NA	NA	NA
comp2239747_c0_seq2	22.6486	76.9059	75.8927	174.362	161.228	88.1014	53.0343	46.6645	NA	NA	NA	NA	NA
comp2239763_c0_seq1	14.673	21.5095	11.5649	0.417457	0.42618	13.3203	20.1108	21.2765	NA	NA	NA	NA	NA
comp2239763_c1_seq4	30.8472	38.129	40.3744	8.60562	2.30537	35.4267	26.1525	30.1558	ref|XP_002597706.1| hypothetical protein BRAFLDRAFT_121667 [Branchiostoma floridae] gb|EEN53718.1| hypothetical protein BRAFLDRAFT_121667 [Branchiostoma floridae]	1e-28	38	53	7
comp2239776_c0_seq1	3.9853	4.74551	1.13793	45.6571	16.2816	1.09169	7.58744	6.53668	gb|ALY05313.1| antistasin [Clytia hemisphaerica]	5e-19	39	55	0
comp2239785_c0_seq3	37.0499	39.3036	37.2813	8.51011	13.0132	44.5083	28.3122	31.759	NA	NA	NA	NA	NA
comp2239858_c0_seq1	156.79	170.068	205.182	5675.6	2797.29	133.577	226.304	128.707	NA	NA	NA	NA	NA
comp2239861_c0_seq2	45.2426	26.4198	17.9387	10.2755	8.9127	28.7858	23.5067	20.6449	NA	NA	NA	NA	NA
comp2239883_c0_seq1	22.3521	35.3669	21.8087	21.6083	0.852361	6.97864	33.2077	45.9046	gb|ELU12111.1| hypothetical protein CAPTEDRAFT_224236 [Capitella teleta]	3e-31	44	59	10
comp2239902_c0_seq1	143.635	107.047	114.61	80.9172	59.9126	108.139	184.909	125.846	NA	NA	NA	NA	NA
comp2239917_c0_seq1	17.3925	24.7578	26.941	5.17045	10.0034	17.909	24.8903	12.3631	NA	NA	NA	NA	NA
comp2239924_c0_seq1	34.1793	27.9848	40.424	92.1951	86.3644	46.8924	37.237	44.3724	gb|ELT96108.1| hypothetical protein CAPTEDRAFT_195084 [Capitella teleta]	1e-11	34	51	6
comp2239935_c0_seq1	5797.41	5330.9	5174.87	4268.04	2627.66	7582.03	5319.81	5365.41	ref|XP_011423091.1| PREDICTED: RNA-binding protein 1-like [Crassostrea gigas] ref|XP_011423093.1| PREDICTED: RNA-binding protein 1-like [Crassostrea gigas]	2e-38	83	95	0
comp2239939_c0_seq1	8.04462	4.05561	5.85916	21.3871	32.1309	3.20463	8.57484	2.73605	NA	NA	NA	NA	NA
comp2239961_c0_seq1	202.536	268.901	242.138	66.5339	72.5842	254.791	252.972	228.424	ref|XP_013402434.1| PREDICTED: DNA-directed RNA polymerase I subunit RPA2-like [Lingula anatina]	0	63	79	1
comp2239973_c0_seq1	17.6957	14.4413	13.4295	2.37649	33.406	13.0215	10.3522	14.0184	ref|XP_002599964.1| hypothetical protein BRAFLDRAFT_212201 [Branchiostoma floridae] gb|EEN55976.1| hypothetical protein BRAFLDRAFT_212201 [Branchiostoma floridae]	3e-41	43	66	1
comp2239992_c0_seq1	169.802	153.849	151.423	650.268	922.676	169.219	150.775	152.084	ref|XP_013395447.1| PREDICTED: outer dense fiber protein 3-like [Lingula anatina]	1e-118	70	81	0
comp2240028_c0_seq3	29.6831	35.089	24.7449	10.5974	5.98651	31.3994	28.816	30.8558	ref|XP_001635704.1| predicted protein [Nematostella vectensis] gb|EDO43641.1| predicted protein, partial [Nematostella vectensis]	5e-13	35	54	0
comp2240069_c0_seq1	278.735	410.667	373.797	1815.5	1375.66	287.542	473.386	423.501	gb|ELU06857.1| hypothetical protein CAPTEDRAFT_228542 [Capitella teleta]	6e-32	49	60	13
comp2240071_c0_seq2	119.112	167.987	146.698	43.9638	83.4466	103.822	134.798	148.381	gb|ELU03312.1| hypothetical protein CAPTEDRAFT_182715 [Capitella teleta]	8e-49	69	87	0
comp2240078_c0_seq1	5.45279	6.87827	4.1982	24.0214	30.4187	11.6551	7.19681	6.51066	NA	NA	NA	NA	NA
comp2240080_c0_seq1	5.20124	1.79399	1.42688	0	0	1.36124	0	2.06891	NA	NA	NA	NA	NA
comp2240131_c0_seq3	44.101	58.1619	58.8057	137.739	206.184	51.4621	62.4605	49.3199	NA	NA	NA	NA	NA
comp2240144_c0_seq1	15.0736	18.3465	14.3483	65.6716	74.9934	26.6305	25.5389	11.2343	NA	NA	NA	NA	NA
comp2240147_c0_seq1	18.6999	20.036	25.3986	84.2334	68.228	15.168	26.9053	22.6803	NA	NA	NA	NA	NA
comp2240169_c0_seq2	14.1154	80.0277	61.0646	8.25361	14.4026	38.161	61.839	26.1786	NA	NA	NA	NA	NA
comp2240180_c1_seq1	313.42	143.367	113.614	379.548	349.817	71.2323	351.234	356.359	NA	NA	NA	NA	NA
comp2240190_c0_seq1	6.05334	6.0906	7.5926	22.1592	20.5168	4.89646	1.4214	7.00887	NA	NA	NA	NA	NA
comp2240211_c0_seq1	17.9297	27.3964	22.6345	7.35457	7.54353	23.2543	27.6927	20.0756	NA	NA	NA	NA	NA
comp2240222_c0_seq1	5.24453	5.35669	6.36011	107.619	121.322	1.70123	5.60739	2.83319	NA	NA	NA	NA	NA
comp2240234_c0_seq2	527.44	459.554	412.315	810.465	824.426	673.313	391.577	365.193	ref|XP_013383575.1| PREDICTED: intraflagellar transport protein 43 homolog A-like [Lingula anatina]	6e-49	63	76	4
comp2240253_c0_seq1	6.70072	14.4391	9.37521	22.7991	33.8722	10.3008	5.81878	8.19496	NA	NA	NA	NA	NA
comp2240281_c0_seq1	103.519	93.9459	88.5532	56.549	49.5802	122.921	102.049	84.7558	NA	NA	NA	NA	NA
comp2240324_c0_seq2	383.95	282.539	258.715	364.543	476.846	469.908	254.023	220.324	NA	NA	NA	NA	NA
comp2240347_c0_seq3	40.6188	31.4243	33.5883	587.336	715.366	36.2646	37.2603	25.5579	NA	NA	NA	NA	NA
comp2240351_c0_seq2	153.406	450.39	400.142	111.13	52.0195	183.826	385.102	408.761	gb|ADZ61653.1| secreted frizzled-related like-protein [Ptychodera flava]	2e-40	53	71	2
comp2240375_c0_seq4	208.371	493.972	486.913	497.742	502.192	322.318	334.324	357.824	ref|XP_011406532.1| PREDICTED: opioid growth factor receptor-like protein 1 [Amphimedon queenslandica]	5e-77	55	73	0
comp2240378_c0_seq1	1306.56	1229.74	903.18	380.831	502.559	1093.72	1093.92	1233.18	gb|ELT90035.1| hypothetical protein CAPTEDRAFT_225499 [Capitella teleta]	8e-120	64	79	3
comp2240387_c0_seq3	264.137	196.477	170.959	78.2214	100.99	179.19	229.129	208.757	gb|ELU17202.1| hypothetical protein CAPTEDRAFT_226823 [Capitella teleta]	4e-25	47	61	0
comp2240405_c0_seq1	18.5044	27.0443	36.2227	4.17457	8.13758	15.1007	18.9239	23.1229	ref|XP_013790827.1| PREDICTED: uncharacterized protein LOC106474682 [Limulus polyphemus]	9e-27	31	49	10
comp2240407_c0_seq1	2280.61	2008.57	2110.05	520.058	775.507	1735.47	1987.55	2177.77	ref|XP_013399943.1| PREDICTED: pre-rRNA processing protein FTSJ3-like [Lingula anatina]	4e-52	62	82	2
comp2240411_c0_seq1	66.3619	84.6408	101.916	29.3515	57.3421	55.5733	93.6531	87.1949	NA	NA	NA	NA	NA
comp2240418_c0_seq1	23.9468	23.9273	32.0287	1.95904	2.82218	34.5041	37.318	30.7129	gb|AEI70677.1| GST-sigma [Perinereis nuntia]	1e-29	58	74	2
comp2240422_c0_seq2	20.4559	15.8635	14.3087	68.6566	36.2949	28.4621	18.3913	10.5388	NA	NA	NA	NA	NA
comp2240424_c0_seq2	15.2171	22.3606	23.2199	77.8367	89.1575	21.3627	21.0663	18.5412	ref|XP_014773131.1| PREDICTED: probable leucine--tRNA ligase, mitochondrial isoform X1 [Octopus bimaculoides]	0	56	70	6
comp2240430_c0_seq1	15.6325	21.5274	19.2944	1.66983	6.76181	15.4115	23.0638	14.7346	NA	NA	NA	NA	NA
comp2240448_c0_seq4	1783.34	2808.47	3290.42	1179.77	1250.09	1878.08	2847.51	2857.83	gb|ELU14230.1| hypothetical protein CAPTEDRAFT_169991 [Capitella teleta]	3e-132	61	77	4
comp2240462_c0_seq2	51.4325	47.8907	45.1508	145.378	113.366	45.9867	41.7304	31.8921	NA	NA	NA	NA	NA
comp2240463_c0_seq1	18.2691	24.4353	23.7088	73.314	52.0834	22.5949	18.7764	22.8805	ref|XP_013411118.1| PREDICTED: multidrug resistance-associated protein 1-like [Lingula anatina]	9e-23	49	67	3
comp2240536_c0_seq3	37.4599	32.3124	36.3905	12.0094	6.42607	39.7408	36.9798	33.2823	NA	NA	NA	NA	NA
comp2240544_c0_seq4	18.2178	27.0685	23.1461	2.85808	3.67454	13.9896	12.5958	20.9427	NA	NA	NA	NA	NA
comp2240549_c0_seq16	5986.59	6344.24	5765.72	3262.45	3724.91	5882.46	5506.29	6337.89	ref|XP_005158415.1| PREDICTED: arginine/serine-rich protein PNISR isoform X1 [Danio rerio]	1e-06	35	52	10
comp2240611_c0_seq1	8.24454	13.5705	12.1349	16.1212	22.2481	9.41022	11.7447	10.7249	NA	NA	NA	NA	NA
comp2240663_c0_seq3	85.6182	65.0941	50.4166	40.6883	42.3018	73.3418	40.6678	49.0671	ref|XP_013380018.1| PREDICTED: 3 beta-hydroxysteroid dehydrogenase/Delta 5-->4-isomerase type 4-like [Lingula anatina]	4e-44	43	60	5
comp2240664_c0_seq1	150.811	582.566	580.727	66.1466	51.3153	196.245	538.142	544.543	ref|XP_003727989.1| PREDICTED: alpha-N-acetylgalactosamine-specific lectin-like [Strongylocentrotus purpuratus]	2e-12	31	49	4
comp2240678_c0_seq1	3.64732	4.14384	3.84843	50.9991	80.8719	3.49378	3.91393	4.07855	NA	NA	NA	NA	NA
comp2240690_c0_seq1	8.86784	16.7177	16.8499	10.9808	3.50667	10.2516	16.5675	14.3342	NA	NA	NA	NA	NA
comp2240696_c0_seq1	67.5762	76.0037	70.5103	25.7528	12.6777	79.4604	56.2193	60.253	gb|AEI70672.1| GST-alpha [Perinereis nuntia]	8e-43	42	64	2
comp2240707_c0_seq1	23.3409	10.0497	10.4682	46.9161	41.3658	7.18997	16.2608	10.4387	ref|XP_010774836.1| PREDICTED: uncharacterized protein LOC104950081 [Notothenia coriiceps]	8e-06	40	58	0
comp2240732_c0_seq1	15.2811	20.6299	31.6663	2.79395	4.44966	9.4943	36.9505	43.1745	ref|XP_011437573.1| PREDICTED: oligodendrocyte transcription factor 3-like [Crassostrea gigas] gb|EKC23485.1| Neurogenic differentiation factor 1 [Crassostrea gigas]	3e-24	74	89	0
comp2240741_c0_seq1	20.9288	8.63906	15.455	27.5535	41.8892	6.87414	16.2491	20.5455	ref|XP_014778274.1| PREDICTED: SCO-spondin-like [Octopus bimaculoides]	2e-13	30	49	9
comp2240767_c0_seq1	17.1887	28.505	37.0684	64.2543	57.8391	12.2314	34.6346	31.2286	NA	NA	NA	NA	NA
comp2240768_c0_seq1	12.4766	18.5762	28.4315	40.3637	31.664	13.0708	14.489	32.9679	ref|XP_014330371.1| PREDICTED: large neutral amino acids transporter small subunit 1-like [Xiphophorus maculatus]	6e-66	47	67	0
comp2240770_c0_seq3	45.8514	17.0346	27.9866	7.19229	3.5973	69.0224	15.8149	16.8924	ref|XP_002592584.1| hypothetical protein BRAFLDRAFT_118911 [Branchiostoma floridae] gb|EEN48595.1| hypothetical protein BRAFLDRAFT_118911 [Branchiostoma floridae]	6e-09	43	60	4
comp2240776_c0_seq2	64.9995	110.6	130.764	60.4016	43.2885	75.1308	88.5551	98.7706	ref|XP_011429811.1| PREDICTED: gamma-tubulin complex component 2-like isoform X2 [Crassostrea gigas]	0	68	84	2
comp2240787_c0_seq3	57.5008	133.955	115.356	35.1592	28.449	78.81	113.481	81.4771	NA	NA	NA	NA	NA
comp2240820_c0_seq1	53.2145	35.5446	28.8952	5.87579	5.65774	52.503	29.7567	25.064	NA	NA	NA	NA	NA
comp2240824_c0_seq1	342.268	302.058	326.321	793.887	676.249	393.471	289.412	269.58	ref|XP_013403448.1| PREDICTED: ropporin-1-like protein [Lingula anatina]	5e-118	75	87	0
comp2240825_c0_seq1	367.699	282.289	329.486	496.585	568.702	359.571	302.231	265.676	gb|ELU06760.1| hypothetical protein CAPTEDRAFT_221626 [Capitella teleta]	7e-108	43	65	5
comp2240830_c0_seq1	8.63203	9.39075	14.4085	33.3979	26.8522	11.1651	14.8161	8.94278	ref|XP_013409855.1| PREDICTED: L-asparaginase-like [Lingula anatina]	6e-49	58	73	9
comp2240833_c0_seq1	79.1137	62.2431	64.6413	19.012	11.3857	76.9002	62.2057	41.827	NA	NA	NA	NA	NA
comp2240840_c0_seq2	69.8809	38.7855	41.5469	54.4604	36.476	88.9756	35.3669	31.6979	gb|ELT88885.1| hypothetical protein CAPTEDRAFT_226166 [Capitella teleta]	1e-07	41	59	0
comp2240852_c1_seq1	10.7504	14.5775	18.6387	33.0458	32.691	13.6028	13.4613	9.50916	NA	NA	NA	NA	NA
comp2240869_c0_seq1	622.517	583.608	570.201	294.502	338.532	779.363	507.736	519.839	ref|XP_013413991.1| PREDICTED: 4-hydroxyphenylpyruvate dioxygenase-like [Lingula anatina]	0	77	88	0
comp2240906_c0_seq1	39.149	64.8161	73.8019	26.9096	28.8356	39.1296	52.5396	40.8342	NA	NA	NA	NA	NA
comp2240916_c0_seq1	1461.29	1346.33	1282.14	43.4416	22.6946	1719.76	1482.5	1164.11	NA	NA	NA	NA	NA
comp2240942_c0_seq2	340.092	203.62	196.886	637.366	832.002	361.573	263.469	178.477	NA	NA	NA	NA	NA
comp2240980_c0_seq1	26.3406	39.6239	51.068	6.71071	11.5402	25.1641	32.0439	29.1133	NA	NA	NA	NA	NA
comp2241002_c0_seq1	19.1037	18.2696	12.7639	47.0444	44.3924	22.2651	14.8191	11.5899	NA	NA	NA	NA	NA
comp2241005_c0_seq3	456.112	708.285	767.27	377.762	351.033	515.036	611.702	557.143	gb|ELT90542.1| hypothetical protein CAPTEDRAFT_148720 [Capitella teleta]	3e-151	55	74	5
comp2241007_c0_seq1	68.3601	46.3961	54.2238	83.299	105.637	81.6785	61.9021	39.524	NA	NA	NA	NA	NA
comp2241022_c0_seq1	411.926	421.963	439.33	146.115	227.292	442.233	382.655	384.382	ref|XP_007901793.1| PREDICTED: protein FAM204A [Callorhinchus milii]	1e-20	36	59	8
comp2241024_c0_seq1	163.799	140.905	144.862	72.9541	86.2377	197.647	117.345	141.893	ref|XP_013404705.1| PREDICTED: peroxiredoxin-4-like [Lingula anatina]	5e-138	81	91	0
comp2241030_c0_seq1	112.076	149.865	135.048	57.6731	63.2149	132.247	137.181	102.012	NA	NA	NA	NA	NA
comp2241047_c0_seq1	10.8019	34.5639	20.4146	64.5081	53.5432	10.8719	16.9756	20.18	ref|XP_011437652.1| PREDICTED: group XIIA secretory phospholipase A2-like [Crassostrea gigas]	9e-19	35	49	9
comp2241107_c1_seq1	43.0305	64.0073	65.4146	16.7951	17.0167	29.2433	53.443	63.9858	NA	NA	NA	NA	NA
comp2241134_c0_seq1	1131.32	1425.55	1376.23	136.607	208.633	1105.21	1320.86	1090.93	NA	NA	NA	NA	NA
comp2241228_c0_seq2	2468.56	1238.84	1110.93	234.444	384.158	2668.9	1488.87	1131.26	NA	NA	NA	NA	NA
comp2241234_c0_seq2	744.628	1741.21	1994.15	289.31	379.895	814.506	1202.25	816.609	ref|XP_008995109.1| PREDICTED: LOW QUALITY PROTEIN: C-type mannose receptor 2 [Callithrix jacchus]	3e-07	26	39	16
comp2241266_c0_seq1	160.704	98.7385	112.177	158.602	178.173	174.535	107.885	98.8588	NA	NA	NA	NA	NA
comp2241296_c0_seq1	212.797	311.874	304.841	206.535	192.187	326.229	344.711	299.854	gb|ELU18877.1| hypothetical protein CAPTEDRAFT_161630 [Capitella teleta]	2e-104	58	75	0
comp2241299_c0_seq1	25318	20732.2	19299.4	16426.7	9597.21	24452.1	24285.5	20574.4	ref|XP_011441305.1| PREDICTED: 60S ribosomal protein L11-like [Crassostrea gigas]	3e-105	89	95	0
comp2241302_c0_seq1	42.1203	19.6695	18.1765	4.04632	10.7148	32.3123	23.6631	18.9867	NA	NA	NA	NA	NA
comp2241308_c0_seq1	203.869	210.79	194.674	58.1861	50.7113	153.333	205.692	162.732	NA	NA	NA	NA	NA
comp2241377_c0_seq1	167.708	430.792	649.334	52.3797	99.1339	103.407	467.48	617.692	NA	NA	NA	NA	NA
comp2241380_c0_seq2	9.47009	5.30753	7.64352	0.77079	334.031	10.005	3.29732	4.6953	ref|NP_001033371.1| Uncharacterized protein CELE_T15B12.1 [Caenorhabditis elegans] emb|CCD71621.1| Uncharacterized protein CELE_T15B12.1 [Caenorhabditis elegans]	8e-09	44	55	3
comp2241394_c0_seq1	19.5673	42.124	20.4556	0.417457	6.68457	44.7904	12.2078	14.2831	NA	NA	NA	NA	NA
comp2241420_c0_seq2	6.12736	11.4962	9.79398	14.3872	38.7111	11.2348	7.19099	6.49815	NA	NA	NA	NA	NA
comp2241437_c0_seq1	191.938	144.235	119.779	23.3462	56.4532	141.889	174.103	146.611	NA	NA	NA	NA	NA
comp2241447_c0_seq1	157.708	165.531	180.044	42.841	101.674	118.894	154.878	163.333	NA	NA	NA	NA	NA
comp2241498_c0_seq2	51.0733	258.884	212.043	40.9068	23.107	110.995	161.232	211.306	gb|ELU15627.1| hypothetical protein CAPTEDRAFT_92948 [Capitella teleta]	4e-62	36	59	0
comp2241503_c0_seq1	4.19038	5.40128	3.90728	32.4648	22.9394	10.286	6.86087	4.07855	NA	NA	NA	NA	NA
comp2241506_c0_seq1	176.322	229.452	236.885	59.1192	58.9127	189.889	216.565	150.887	NA	NA	NA	NA	NA
comp2241507_c0_seq1	186.266	303.362	415.757	18.8837	15.9328	386.728	317.387	248.007	ref|XP_010081541.1| PREDICTED: LOW QUALITY PROTEIN: interferon-induced very large GTPase 1-like [Pterocles gutturalis]	6e-35	24	44	11
comp2241517_c0_seq3	537.955	757.615	700.08	1561.5	1446.99	476.222	705.103	642.736	gb|ELU04927.1| hypothetical protein CAPTEDRAFT_168015 [Capitella teleta]	1e-124	50	68	6
comp2241541_c0_seq2	1317.92	1588.36	2024.65	404.776	898.405	806.829	1686.17	1888.78	gb|ELU17025.1| hypothetical protein CAPTEDRAFT_187682 [Capitella teleta]	1e-27	64	92	0
comp2241548_c2_seq3	196.472	179.95	172.392	358.344	485.553	151.922	191.041	151.345	NA	NA	NA	NA	NA
comp2241560_c0_seq1	44.9752	88.3808	95.0887	188.952	272.194	79.0981	54.8555	54.8669	ref|XP_007323358.1| hypothetical protein SERLADRAFT_401260 [Serpula lacrymans var. lacrymans S7.9] ref|XP_007773954.1| calmodulin [Coniophora puteana RWD-64-598 SS2] gb|EGN94437.1| hypothetical protei	7e-82	82	92	0
comp2241576_c0_seq2	17.2119	34.6396	22.7838	7.61107	9.8489	19.0597	22.4037	17.9613	NA	NA	NA	NA	NA
comp2241582_c0_seq1	18.7254	15.2382	17.2667	28.9341	35.436	29.2616	16.721	11.6367	gb|ELU09639.1| hypothetical protein CAPTEDRAFT_119081 [Capitella teleta]	7e-66	67	78	1
comp2241601_c0_seq1	20.1659	14.6811	18.951	41.5206	48.9093	9.33977	31.0972	29.2318	ref|XP_001640311.1| predicted protein [Nematostella vectensis] gb|EDO48248.1| predicted protein, partial [Nematostella vectensis]	3e-30	84	88	0
comp2241622_c0_seq1	42.0441	50.8347	54.937	22.4445	21.228	42.4527	49.4947	43.8383	ref|XP_013095611.1| PREDICTED: magnesium-dependent phosphatase 1-like isoform X1 [Biomphalaria glabrata]	2e-49	56	74	0
comp2241686_c0_seq2	61.0132	80.4373	84.781	211.551	201.241	70.0162	54.2042	52.3833	gb|ELU05822.1| hypothetical protein CAPTEDRAFT_167235 [Capitella teleta]	2e-141	53	74	1
comp2241708_c0_seq1	32.6093	29.5236	36.485	2.44062	9.59738	54.0801	30.6661	26.39	NA	NA	NA	NA	NA
comp2241717_c1_seq2	18.4948	26.8829	27.1105	46.6623	43.2044	12.27	25.5968	19.318	NA	NA	NA	NA	NA
comp2241733_c1_seq1	56.0462	32.2469	27.6267	96.6877	69.4927	41.451	35.179	48.2303	NA	NA	NA	NA	NA
comp2241744_c0_seq2	387.517	407.675	405.61	44.4781	147.392	258.277	519.397	473.043	NA	NA	NA	NA	NA
comp2241799_c0_seq1	93.3753	75.8819	56.9779	76.4561	93.7007	143.862	42.6564	40.2488	gb|EFX86930.1| GST-N-Metaxin-like protein [Daphnia pulex]	5e-60	44	62	3
comp2241810_c0_seq1	5.03458	42.112	23.2382	0	0	9.80449	21.0113	12.6219	NA	NA	NA	NA	NA
comp2241829_c1_seq1	28.3897	27.9863	43.1122	19.0748	18.6644	13.7429	47.4937	30.4097	NA	NA	NA	NA	NA
comp2241844_c0_seq2	79.2602	81.713	87.1764	20.8087	37.4966	92.8745	114.627	76.4854	NA	NA	NA	NA	NA
comp2241847_c0_seq5	67.0231	95.999	113.269	2.44062	9.24825	89.0122	86.6883	121.392	NA	NA	NA	NA	NA
comp2241862_c0_seq3	26.1321	29.6318	30.1172	7.4815	2.65431	35.6789	18.9618	16.3534	NA	NA	NA	NA	NA
comp2241866_c1_seq1	55.9859	37.6157	36.2611	74.1437	68.7917	57.2582	31.8902	28.0398	ref|XP_002602705.1| hypothetical protein BRAFLDRAFT_210165 [Branchiostoma floridae] gb|EEN58717.1| hypothetical protein BRAFLDRAFT_210165 [Branchiostoma floridae]	4e-59	58	80	4
comp2241874_c0_seq1	48.9297	82.9559	85.2983	490.241	257.785	66.6282	71.4723	84.6084	ref|XP_011449062.1| PREDICTED: protein kinase C and casein kinase substrate in neurons protein 1-like isoform X1 [Crassostrea gigas] ref|XP_011449063.1| PREDICTED: protein kinase C and casein kinase s	1e-14	50	64	10
comp2241894_c0_seq1	43.5975	66.7587	48.2507	15.0912	22.6106	51.6251	65.0082	57.0529	gb|ELT99150.1| hypothetical protein CAPTEDRAFT_183161 [Capitella teleta]	1e-27	45	67	2
comp2241915_c0_seq2	827.905	751.191	772.41	1215.33	1474.22	874.372	713.605	731.495	gb|ELT96171.1| hypothetical protein CAPTEDRAFT_206219 [Capitella teleta]	0	43	58	8
comp2241974_c0_seq1	184.164	161.764	147.376	19.8456	57.4296	175.192	194.107	231.659	gb|ELU05671.1| hypothetical protein CAPTEDRAFT_229021 [Capitella teleta]	5e-07	30	44	19
comp2242002_c0_seq1	14.4968	17.157	14.9415	2.44062	2.57047	14.9966	37.2749	7.01777	NA	NA	NA	NA	NA
comp2242014_c0_seq1	20.1131	32.0142	36.187	52.3143	61.1273	21.9997	32.0293	19.7944	NA	NA	NA	NA	NA
comp2242018_c0_seq1	50.32	36.2782	23.6449	15.9262	3.8556	41.7802	15.9221	49.8659	NA	NA	NA	NA	NA
comp2242039_c0_seq2	25.7102	65.9612	61.8131	0	0.852361	29.4575	32.8166	43.6777	ref|XP_002740407.1| PREDICTED: protein PLANT CADMIUM RESISTANCE 3-like [Saccoglossus kowalevskii]	2e-10	41	59	2
comp2242060_c0_seq1	45.937	55.485	42.5238	14.2576	18.0067	54.8246	42.535	50.5271	NA	NA	NA	NA	NA
comp2242133_c0_seq1	216.241	241.559	248.144	146.622	125.03	252.212	250.554	246.991	ref|XP_013387774.1| PREDICTED: hydroxyacylglutathione hydrolase, mitochondrial-like isoform X1 [Lingula anatina]	1e-123	62	77	0
comp2242173_c0_seq1	52.1522	55.7667	70.213	10.9507	26.2215	37.6897	58.0083	52.1107	NA	NA	NA	NA	NA
comp2242181_c0_seq1	38.6838	47.9149	40.9662	78.8326	94.2012	41.4801	47.0308	34.4065	NA	NA	NA	NA	NA
comp2242219_c0_seq1	46.6204	40.5985	29.4612	178.153	210.898	22.6555	46.7009	42.0146	NA	NA	NA	NA	NA
comp2242237_c0_seq1	14.3299	11.2598	8.60864	0	1.54364	15.3991	7.78439	5.77603	NA	NA	NA	NA	NA
comp2242253_c0_seq1	41.7871	48.9194	36.5344	3.91807	9.77185	50.6417	40.5259	34.5122	NA	NA	NA	NA	NA
comp2242282_c0_seq1	21840	17780.1	17576.4	11307.5	8244.3	21681.6	21064.2	19156.3	ref|XP_011450032.1| PREDICTED: nascent polypeptide-associated complex subunit alpha-like [Crassostrea gigas]	9e-75	80	89	1
comp2242292_c0_seq1	417.44	536.655	493.467	270.126	261.594	444.17	432.791	477.968	ref|XP_013390226.1| PREDICTED: uncharacterized protein LOC106158698 [Lingula anatina]	1e-142	53	69	2
comp2242294_c0_seq2	145.017	238.726	273.071	483.917	382.027	136.77	233.958	234.794	gb|EKC19376.1| Cyclic AMP-dependent transcription factor ATF-2 [Crassostrea gigas]	6e-55	37	50	22
comp2242307_c0_seq1	4.23996	10.2129	16.6394	103.532	129.498	7.28049	6.08798	9.38171	NA	NA	NA	NA	NA
comp2242318_c0_seq1	393.588	666.439	582.221	236.023	147.043	313.455	551.703	601.895	ref|XP_014668398.1| PREDICTED: uncharacterized protein LOC106809727 [Priapulus caudatus]	1e-67	45	59	2
comp2242379_c0_seq1	19.2661	23.8822	36.4966	2.85808	10.9664	12.3341	30.9032	25.744	NA	NA	NA	NA	NA
comp2242382_c0_seq1	12.2313	16.1095	13.0037	39.5302	54.6141	18.9023	14.7756	7.39349	NA	NA	NA	NA	NA
comp2242389_c0_seq1	17.9122	24.9229	23.4289	48.8137	76.6836	21.3684	17.4794	18.3647	NA	NA	NA	NA	NA
comp2242395_c0_seq1	109.7	76.3277	77.0054	38.1783	48.574	91.5114	71.2757	91.2339	ref|XP_013416299.1| PREDICTED: protein CMSS1-like isoform X2 [Lingula anatina]	2e-64	49	72	2
comp2242437_c0_seq2	11.0625	10.9145	12.4692	110.495	95.1842	8.3063	13.5077	9.1578	NA	NA	NA	NA	NA
comp2242445_c0_seq1	4.91417	18.3815	33.7464	24.9519	19.2514	5.7407	11.238	31.2635	ref|XP_004083967.1| PREDICTED: solute carrier family 22 member 6-like isoform X2 [Oryzias latipes]	2e-30	36	55	1
comp2242456_c0_seq1	34.8334	92.5173	89.6106	19.4909	15.1709	36.8812	72.8936	95.7619	ref|XP_009010894.1| hypothetical protein HELRODRAFT_185259 [Helobdella robusta] gb|ESO10625.1| hypothetical protein HELRODRAFT_185259 [Helobdella robusta]	2e-18	41	63	1
comp2242464_c0_seq3	41.2207	37.3965	33.4404	78.3549	98.228	39.5964	31.8989	35.3875	ref|XP_013392012.1| PREDICTED: uncharacterized protein LOC106160045 [Lingula anatina] ref|XP_013400566.1| PREDICTED: uncharacterized protein LOC106166521 [Lingula anatina]	2e-17	41	56	3
comp2242466_c0_seq1	5.52645	6.05309	9.17904	32.7527	25.8859	7.25839	9.83685	9.85918	NA	NA	NA	NA	NA
comp2242472_c0_seq1	31.7957	68.1526	59.963	90.5947	208.422	38.5331	60.2834	24.6382	NA	NA	NA	NA	NA
comp2242477_c0_seq1	68.697	117.358	166.015	22.8646	44.3794	103.033	99.6341	60.272	NA	NA	NA	NA	NA
comp2242487_c0_seq1	86.2019	120.545	134.715	57.5449	72.8051	82.4984	98.4675	126.545	NA	NA	NA	NA	NA
comp2242509_c0_seq1	103.12	66.5594	62.5338	68.5859	48.0669	91.1814	66.4178	53.7795	NA	NA	NA	NA	NA
comp2242516_c0_seq1	14.8489	14.5532	16.3	35.6134	55.4328	11.0418	16.1681	16.9991	NA	NA	NA	NA	NA
comp2242539_c0_seq1	48.4306	51.087	46.2386	112.429	99.0227	36.4238	60.3879	44.8077	NA	NA	NA	NA	NA
comp2242540_c0_seq1	34.752	19.6538	12.3315	6.71203	3.5973	17.1619	20.4235	28.6862	ref|XP_013390466.1| PREDICTED: uncharacterized protein LOC106158895 [Lingula anatina]	3e-22	34	58	5
comp2242548_c0_seq1	27.5063	10.2664	12.776	26.6858	37.2581	14.6416	7.18804	17.4855	NA	NA	NA	NA	NA
comp2242564_c0_seq2	147.435	156.501	139.605	81.0441	63.9494	171.327	134.006	128.264	NA	NA	NA	NA	NA
comp2242569_c0_seq3	26.9057	78.2412	99.2985	2.37649	0	12.2728	25.5418	44.654	gb|ELU08936.1| hypothetical protein CAPTEDRAFT_178354 [Capitella teleta]	6e-25	43	58	3
comp2242578_c0_seq2	343.244	488.129	382.095	131.402	166.07	308.844	457.365	453.326	NA	NA	NA	NA	NA
comp2242590_c0_seq1	35.9407	38.7886	55.976	4.39966	7.45309	56.0744	45.1289	36.595	NA	NA	NA	NA	NA
comp2242650_c0_seq1	21.511	24.2509	36.3376	4.68886	4.5269	24.3388	41.7944	17.7591	NA	NA	NA	NA	NA
comp2242654_c0_seq1	386.259	346.574	274.77	166.665	191.798	388.158	296.601	295.854	NA	NA	NA	NA	NA
comp2242682_c0_seq1	531.733	670.997	623.437	277.541	388.492	736.548	627.307	643.179	ref|XP_013411042.1| PREDICTED: mRNA cap guanine-N7 methyltransferase-like [Lingula anatina]	6e-156	64	78	1
comp2242708_c0_seq1	15.4693	72.4547	77.2615	22.862	8.63422	15.6211	50.0096	44.003	gb|ELT88534.1| hypothetical protein CAPTEDRAFT_221070 [Capitella teleta]	4e-40	32	52	7
comp2242712_c0_seq1	2.31789	2.30189	1.29331	54.9787	23.0671	1.60003	2.31303	2.03927	ref|XP_002596250.1| hypothetical protein BRAFLDRAFT_164393 [Branchiostoma floridae] gb|EEN52262.1| hypothetical protein BRAFLDRAFT_164393, partial [Branchiostoma floridae]	2e-20	33	50	5
comp2242747_c0_seq1	858.316	961.462	874.776	606.379	436.666	1257.82	909.116	786.979	NA	NA	NA	NA	NA
comp2242780_c0_seq2	7.20523	5.07262	5.90808	35.3242	46.033	8.90846	6.39202	10.6442	NA	NA	NA	NA	NA
comp2242781_c0_seq1	52.8783	29.9693	38.9721	266.684	147.123	37.8978	42.9404	44.0905	ref|XP_013409385.1| PREDICTED: neuronal acetylcholine receptor subunit alpha-9-like [Lingula anatina]	8e-08	25	48	7
comp2242793_c0_seq2	3.85381	6.4242	6.14985	0.77079	0.600649	5.182	6.5975	6.88209	ref|XP_013397337.1| PREDICTED: kelch-like protein 12 [Lingula anatina] ref|XP_013379276.1| PREDICTED: kelch-like protein 12 [Lingula anatina]	3e-23	37	63	7
comp2242807_c1_seq1	7.95959	1.71127	3.26657	0	0.600649	2.23374	1.46773	2.84208	NA	NA	NA	NA	NA
comp2242808_c0_seq3	204.528	179.062	135.934	76.6471	96.372	182.193	191.009	166.633	NA	NA	NA	NA	NA
comp2242815_c0_seq1	81.5696	55.7971	114.39	24.274	19.3993	100.662	52.4005	71.8738	NA	NA	NA	NA	NA
comp2242820_c0_seq1	20.3257	16.4849	17.1805	57.2544	42.5735	19.3763	17.1697	18.5833	NA	NA	NA	NA	NA
comp2242834_c0_seq1	15.5371	29.7651	32.0166	73.5404	93.1946	15.6547	28.0922	17.8441	gb|KOF75486.1| hypothetical protein OCBIM_22034639mg [Octopus bimaculoides]	2e-26	36	60	0
comp2242854_c1_seq5	93.5046	122.42	124.656	36.4182	58.7887	118.501	112.548	133.297	ref|XP_011670600.1| PREDICTED: zinc finger protein OZF-like [Strongylocentrotus purpuratus]	3e-16	53	68	0
comp2242864_c0_seq1	36.8261	25.4926	22.9266	10.6615	15.6543	21.1505	41.8083	42.7085	NA	NA	NA	NA	NA
comp2242888_c0_seq1	29.4249	40.0292	48.4003	15.862	24.2584	16.5445	37.4948	40.5342	NA	NA	NA	NA	NA
comp2242933_c0_seq1	1502.12	1902.57	1239.27	112726	89100.6	2280.7	2184.21	2427.8	ref|XP_014770637.1| PREDICTED: sarcoplasmic calcium-binding proteins I, III, and IV-like [Octopus bimaculoides]	2e-73	60	79	1
comp2242968_c0_seq2	49.3614	29.6198	49.7717	12.0748	11.5536	25.2592	30.5239	31.3718	NA	NA	NA	NA	NA
comp2242981_c0_seq1	66.1401	64.5729	58.1147	28.8359	25.8657	78.7324	80.0183	62.3347	ref|XP_011418571.1| PREDICTED: U6 snRNA-associated Sm-like protein LSm5 [Crassostrea gigas]	8e-47	88	95	0
comp2242993_c0_seq2	233.579	249.922	350.039	1415.08	1142.75	281.689	275.484	349.806	dbj|BAD34676.1| creatine kinase, mitochondrial [Hediste diversicolor]	1e-47	92	96	0
comp2243002_c0_seq1	42.1719	29.7105	18.2662	118.551	80.7977	62.6638	30.5324	21.2281	NA	NA	NA	NA	NA
comp2243025_c0_seq2	1597.76	1450.68	1275.28	520.3	412.725	1157.71	1274.67	1177.02	gb|KRZ90833.1| Calmodulin [Trichinella sp. T8]	1e-79	65	78	3
comp2243080_c0_seq1	1030.73	804.64	865.796	2812.16	2040.44	1822.32	1185.6	1352.12	NA	NA	NA	NA	NA
comp2243104_c0_seq1	243.418	225.404	152.734	23.761	37.2047	180.312	177.712	185.609	NA	NA	NA	NA	NA
comp2243123_c0_seq1	584.672	383.445	407.977	301.71	341.264	547.951	253.406	297.919	ref|XP_014678485.1| PREDICTED: neuronal calcium sensor 2-like isoform X1 [Priapulus caudatus]	1e-05	39	58	5
comp2243124_c0_seq1	24.0228	6.30581	1.79847	2.37649	1.96982	5.21966	3.4536	5.93177	NA	NA	NA	NA	NA
comp2243141_c0_seq1	126.414	83.8325	106.179	157.084	136.919	223.946	99.1649	90.1295	ref|XP_002731096.1| PREDICTED: E3 ubiquitin-protein ligase HACE1-like [Saccoglossus kowalevskii]	4e-33	52	66	0
comp2243143_c0_seq1	22.296	23.3069	22.5477	89.9783	73.4358	23.3494	22.2154	19.7641	NA	NA	NA	NA	NA
comp2243193_c0_seq1	13.615	27.3576	25.58	42.3882	33.0132	20.6122	16.5762	17.9494	ref|XP_011679029.1| PREDICTED: ankyrin repeat domain-containing protein 50-like [Strongylocentrotus purpuratus]	2e-32	33	50	3
comp2243209_c0_seq1	22.9087	26.2047	25.0892	2.08729	7.1878	40.9667	23.3068	29.593	NA	NA	NA	NA	NA
comp2243214_c0_seq2	13.4243	27.4091	25.3891	2.02316	1.54364	5.92993	24.1463	14.0237	NA	NA	NA	NA	NA
comp2243227_c0_seq1	27.3197	28.5853	29.0811	7.73932	10.4429	32.1091	24.3029	23.6234	NA	NA	NA	NA	NA
comp2243232_c0_seq1	25.5237	38.8433	35.9064	1.18825	2.30537	16.3993	21.2139	37.6718	NA	NA	NA	NA	NA
comp2243264_c0_seq1	34.7715	64.9551	55.5793	28.162	21.8353	40.9966	92.7152	41.7121	NA	NA	NA	NA	NA
comp2243270_c0_seq1	23.5549	27.0627	24.048	9.2809	4.19794	30.929	25.3535	17.8434	ref|XP_792047.2| PREDICTED: CST complex subunit STN1 isoform X1 [Strongylocentrotus purpuratus]	1e-44	33	50	14
comp2243273_c0_seq1	7.97407	6.14135	8.86058	35.1946	48.5806	7.97651	15.5167	5.57746	NA	NA	NA	NA	NA
comp2243275_c0_seq1	6.04677	4.53705	4.75228	19.8442	15.4731	2.16659	2.31303	5.08815	ref|XP_006120747.1| PREDICTED: opsin-5 isoform X1 [Pelodiscus sinensis]	2e-16	41	56	3
comp2243278_c0_seq2	15.6772	10.8604	11.6297	31.7607	45.3485	7.47503	7.87705	18.6455	gb|ELU13540.1| hypothetical protein CAPTEDRAFT_146902 [Capitella teleta]	1e-43	68	79	0
comp2243303_c0_seq1	7.14739	12.8898	17.0394	0.77079	1.70472	12.0488	8.42413	7.49952	NA	NA	NA	NA	NA
comp2243318_c0_seq1	560.255	479.213	349.142	2196.23	2223.21	640.888	557.15	483.682	NA	NA	NA	NA	NA
comp2243320_c0_seq1	29.9632	23.3893	23.1465	118.712	68.4051	37.4002	19.0804	15.3046	ref|XP_009044455.1| hypothetical protein LOTGIDRAFT_156189 [Lottia gigantea] gb|ESP04946.1| hypothetical protein LOTGIDRAFT_156189 [Lottia gigantea]	1e-74	54	74	2
comp2243329_c0_seq1	70.6236	28.2996	33.7487	29.9914	27.3054	66.8867	32.9937	31.0369	NA	NA	NA	NA	NA
comp2243345_c0_seq1	62.2591	104.801	121.614	61.4944	58.1174	57.7171	80.1575	74.0926	ref|XP_013074604.1| PREDICTED: glucosidase 2 subunit beta-like [Biomphalaria glabrata]	4e-68	42	61	5
comp2243368_c0_seq4	606.934	499.833	506.214	45.436	30.6442	605.447	634.852	594.107	NA	NA	NA	NA	NA
comp2243418_c0_seq1	47.1496	62.9647	67.9272	33.0078	33.8857	65.4061	72.3701	98.0232	ref|XP_013387750.1| PREDICTED: transcription factor 15-like [Lingula anatina]	5e-51	70	79	3
comp2243436_c0_seq1	9.49035	36.8347	30.3139	80.4382	60.4459	29.5474	24.4214	21.2295	emb|CAJ38812.1| putative origin recognition complex subunit 3 protein [Platynereis dumerilii]	2e-92	64	79	0
comp2243447_c0_seq1	43.8672	129.692	155.847	25.9176	3.93285	155.031	107.389	92.3366	NA	NA	NA	NA	NA
comp2243473_c0_seq1	10.1763	22.2336	40.9445	5.17045	11.0368	12.2912	16.0841	17.876	NA	NA	NA	NA	NA
comp2243479_c0_seq1	11.7034	14.7213	6.14788	241.412	27.8486	7.69878	11.4638	4.76348	gb|ELU11980.1| hypothetical protein CAPTEDRAFT_183785 [Capitella teleta]	5e-26	36	58	3
comp2243492_c1_seq1	26.0954	25.2196	43.5832	7.19229	6.85904	16.7814	21.9462	29.9326	NA	NA	NA	NA	NA
comp2243519_c0_seq1	6.77261	8.50501	7.5926	29.4497	33.51	8.70559	5.26875	6.02958	NA	NA	NA	NA	NA
comp2243528_c0_seq1	190.607	191.21	172.944	364.36	371.304	148.815	185.725	149.07	gb|ELU07222.1| hypothetical protein CAPTEDRAFT_190146 [Capitella teleta]	3e-74	37	55	15
comp2243549_c0_seq5	38.8569	52.3211	64.2534	30.2152	31.1478	37.7437	48.5186	53.2009	NA	NA	NA	NA	NA
comp2243576_c0_seq2	17.3746	12.4585	13.3885	32.3692	38.4592	24.7369	16.281	19.0637	ref|XP_015265070.1| PREDICTED: sushi, von Willebrand factor type A, EGF and pentraxin domain-containing protein 1 [Gekko japonicus]	6e-07	36	55	17
comp2243606_c0_seq1	8.82003	4.94568	5.15144	39.8547	54.6475	7.62584	6.75092	2.19569	NA	NA	NA	NA	NA
comp2243608_c0_seq1	19.4472	18.669	25.2901	2.9222	6.16097	18.7866	17.6096	10.1378	NA	NA	NA	NA	NA
comp2243662_c0_seq1	60.1188	44.942	48.5454	22.0938	23.3859	77.5576	41.736	66.4106	NA	NA	NA	NA	NA
comp2243674_c0_seq2	15.0832	7.37019	6.72775	1.25237	3.17112	10.2066	12.4337	9.85918	NA	NA	NA	NA	NA
comp2243785_c0_seq1	24.8124	43.7857	40.6018	11.1745	3.25496	8.43195	30.7151	48.549	NA	NA	NA	NA	NA
comp2243810_c0_seq2	826.866	901.308	851.203	4624.75	5618.08	1074.24	914.452	905.247	gb|ELT99065.1| hypothetical protein CAPTEDRAFT_197722 [Capitella teleta]	6e-05	44	65	6
comp2243818_c0_seq2	14.9586	29.9257	29.2593	57.5776	50.2044	14.9658	14.8422	27.9433	NA	NA	NA	NA	NA
comp2243820_c0_seq1	59.4735	127.723	175.309	36.7977	48.3522	64.1078	109.451	184.987	NA	NA	NA	NA	NA
comp2243881_c0_seq1	113.255	124.94	125.593	32.2083	50.5667	111.993	129.854	115.225	ref|XP_005097943.1| PREDICTED: tetratricopeptide repeat protein 4-like [Aplysia californica]	1e-116	50	71	1
comp2243915_c0_seq1	15.5051	23.8788	26.2529	5.10632	6.76162	18.9125	27.8083	34.6476	gb|ELU09885.1| hypothetical protein CAPTEDRAFT_128327 [Capitella teleta]	3e-72	42	66	2
comp2243922_c0_seq1	13.4436	53.101	49.5898	1.25237	1.45301	12.9787	56.8762	54.0824	NA	NA	NA	NA	NA
comp2243923_c0_seq1	1102.8	1195.01	1065.47	965.481	688.874	1264.12	1135.18	1297.14	gb|ELU07646.1| hypothetical protein CAPTEDRAFT_135371 [Capitella teleta]	3e-135	59	79	2
comp2243948_c0_seq4	72.6956	85.0527	63.5454	386.269	503.044	64.1918	77.9081	88.1827	NA	NA	NA	NA	NA
comp2243954_c1_seq1	10.41	17.2157	14.2117	21.5808	31.5604	15.3406	18.1859	16.8338	NA	NA	NA	NA	NA
comp2243959_c0_seq1	56.7703	70.3932	75.2772	45.2096	24.6509	60.117	62.7935	70.3654	ref|XP_005089573.1| PREDICTED: E3 ubiquitin-protein ligase TRIM56-like [Aplysia californica]	2e-15	32	46	14
comp2243962_c0_seq1	13.8721	13.859	15.5665	0.77079	4.62412	19.4414	8.82378	8.70273	gb|KOF83333.1| hypothetical protein OCBIM_22023988mg, partial [Octopus bimaculoides]	3e-14	37	55	3
comp2243982_c0_seq2	357.002	532.262	424.791	53.6321	89.2186	236.755	368.483	562.534	NA	NA	NA	NA	NA
comp2243988_c0_seq1	199.943	274.278	239.55	58.122	53.6412	351.445	275.622	140.355	gb|ELU03686.1| hypothetical protein CAPTEDRAFT_206360 [Capitella teleta]	5e-47	34	53	4
comp2244052_c0_seq1	0.222665	7.41418	4.46775	29.4811	16.171	1.14535	6.02139	4.30246	ref|XP_013780129.1| PREDICTED: pappalysin-1-like, partial [Limulus polyphemus]	2e-24	55	67	2
comp2244056_c0_seq2	48.2066	33.8506	34.6735	10.1799	14.8792	37.482	27.9271	47.0565	emb|CAX51846.1| putative zinc finger transcription factor [Platynereis dumerilii]	2e-123	98	98	0
comp2244057_c0_seq1	18.0364	21.9215	26.129	135.027	57.057	20.1282	38.3083	24.2066	NA	NA	NA	NA	NA
comp2244058_c0_seq1	57.9494	82.0461	80.3322	6.23044	7.8591	52.9371	55.391	40.7641	ref|XP_002295608.1| predicted protein [Thalassiosira pseudonana CCMP1335] gb|ACI64325.1| predicted protein [Thalassiosira pseudonana CCMP1335]	7e-13	58	67	8
comp2244063_c0_seq1	10.7499	8.33683	14.9926	2.02316	1.62748	11.3983	10.1206	10.5092	ref|XP_005099554.1| PREDICTED: uncharacterized protein LOC101846505 [Aplysia californica]	6e-06	28	44	8
comp2244071_c0_seq1	81.034	249.328	182.146	27.8387	20.2076	67.4907	169.312	147.055	gb|KPA18019.1| Pentaxin, partial [Candidatus Magnetomorum sp. HK-1]	7e-08	25	42	14
comp2244088_c0_seq2	53.6652	63.289	56.6599	20.6137	14.2852	67.1454	62.8716	62.3347	ref|XP_011413644.1| PREDICTED: DTW domain-containing protein 1-like [Crassostrea gigas] ref|XP_011413645.1| PREDICTED: DTW domain-containing protein 1-like [Crassostrea gigas]	1e-88	42	65	7
comp2244128_c0_seq1	100.561	95.4166	82.4096	230.078	262.753	137.396	116.321	82.0915	NA	NA	NA	NA	NA
comp2244130_c0_seq1	905.421	935.368	853.086	492.346	573.756	1008.28	912.899	907.125	ref|XP_009062063.1| hypothetical protein LOTGIDRAFT_210477 [Lottia gigantea] gb|ESO87111.1| hypothetical protein LOTGIDRAFT_210477 [Lottia gigantea]	3e-104	70	82	0
comp2244138_c0_seq2	149.559	166.914	147.065	91.7684	79.4998	159.623	128.16	140.879	ref|XP_011414156.1| PREDICTED: UPF0568 protein C14orf166 homolog isoform X1 [Crassostrea gigas]	4e-77	55	71	3
comp2244162_c0_seq3	7.2565	7.74621	11.6259	32.2711	32.8723	7.72954	9.62259	3.31427	NA	NA	NA	NA	NA
comp2244171_c0_seq1	15.1775	17.2412	18.6603	29.8972	32.7312	22.2361	17.3867	20.2245	NA	NA	NA	NA	NA
comp2244199_c0_seq1	511.797	545.443	483.03	97.1772	162.62	549.747	495.717	382.49	NA	NA	NA	NA	NA
comp2244207_c0_seq1	118.028	118.977	119.794	313.745	769.597	138.033	111.254	101.333	ref|XP_012273812.1| PREDICTED: cyclin-dependent kinase 7 [Orussus abietinus]	2e-180	73	86	2
comp2244244_c0_seq1	9.56606	13.3923	13.8326	0	4.71475	16.1389	7.53545	14.8153	NA	NA	NA	NA	NA
comp2244248_c0_seq1	58.6184	47.3536	42.9908	49.095	22.4932	58.7379	51.3761	32.6373	NA	NA	NA	NA	NA
comp2244297_c0_seq1	9.10187	4.86573	4.09595	94.76	326.225	4.00542	3.39284	4.73384	ref|XP_013419556.1| PREDICTED: uncharacterized protein LOC106180188 [Lingula anatina]	6e-46	49	67	0
comp2244327_c0_seq1	10675.6	7739.7	7319.35	5669.04	3422.69	9826.32	8667.34	6963.31	gb|ELU15643.1| hypothetical protein CAPTEDRAFT_219432 [Capitella teleta]	2e-82	49	73	2
comp2244353_c0_seq1	6.67967	18.3622	10.9352	1.54158	1.62748	4.0026	10.9052	19.5247	gb|ELT95977.1| hypothetical protein CAPTEDRAFT_92160 [Capitella teleta]	2e-41	42	64	4
comp2244353_c1_seq1	3.45975	15.3231	14.3827	0.834915	2.65431	3.21074	12.8535	15.1992	ref|XP_013421047.1| PREDICTED: sodium-dependent glucose transporter 1-like [Lingula anatina]	2e-32	48	69	0
comp2244422_c0_seq2	6.65248	21.8158	15.7807	4.04632	3.24836	17.4018	17.3492	9.13344	NA	NA	NA	NA	NA
comp2244489_c0_seq1	105.612	74.1118	83.1625	193.921	205.68	116.821	77.8122	64.7415	ref|XP_013400956.1| PREDICTED: spermatogenesis-associated protein 4-like [Lingula anatina] ref|XP_013386771.1| PREDICTED: spermatogenesis-associated protein 4-like isoform X1 [Lingula anatina] ref|XP_	7e-97	59	74	6
comp2244546_c0_seq1	195.1	124.54	119.554	412.908	508.805	207.474	173.134	105.348	NA	NA	NA	NA	NA
comp2244551_c0_seq2	114.064	175.942	173.79	32.2737	52.1948	89.0289	100.211	71.4128	NA	NA	NA	NA	NA
comp2244555_c0_seq2	2.38187	7.82895	6.74341	0	0.600649	9.67822	5.49162	6.09708	NA	NA	NA	NA	NA
comp2244572_c0_seq1	87.1564	155.389	177.258	34.6463	39.2277	156.869	203.615	172.182	NA	NA	NA	NA	NA
comp2244580_c0_seq1	9.97326	22.4864	14.3792	17.3094	33.6073	27.1981	23.6283	11.7131	ref|XP_014662095.1| PREDICTED: zinc finger protein 862-like [Priapulus caudatus]	2e-71	44	67	3
comp2244586_c0_seq1	20.8082	34.3878	39.3842	70.5528	65.1878	19.416	36.0504	12.2119	NA	NA	NA	NA	NA
comp2244589_c0_seq2	296.877	726.042	654.494	32131.8	16152.6	239.484	830.471	633.817	ref|XP_013996583.1| PREDICTED: purine nucleoside phosphorylase-like [Salmo salar]	2e-113	63	78	0
comp2244592_c0_seq2	54.5491	74.36	86.1206	37.0908	37.0503	58.5397	69.3647	79.0602	gb|ELT98236.1| hypothetical protein CAPTEDRAFT_185095 [Capitella teleta]	8e-118	54	73	1
comp2244595_c0_seq1	74.6674	86.2728	87.8882	38.372	43.547	105.386	96.2298	64.8781	ref|XP_006815560.1| PREDICTED: general transcription factor 3C polypeptide 6-like [Saccoglossus kowalevskii]	5e-15	38	58	13
comp2244623_c0_seq1	72.6352	91.7331	145.36	12.169	14.5571	50.1957	97.6487	117.137	ref|XP_013414714.1| PREDICTED: sporulation-specific protein 15-like isoform X1 [Lingula anatina]	3e-15	32	53	6
comp2244716_c0_seq1	28497.9	21632.6	20346.7	15611.4	10606.2	26615.8	24706.2	24395.4	ref|XP_009021809.1| hypothetical protein HELRODRAFT_157417 [Helobdella robusta] gb|ESO00035.1| hypothetical protein HELRODRAFT_157417 [Helobdella robusta]	2e-102	78	90	1
comp2244718_c0_seq4	59.1876	50.5446	42.4504	3.62887	4.36582	43.8843	44.1069	30.7975	NA	NA	NA	NA	NA
comp2244773_c1_seq1	29.0473	25.5907	41.3956	3.9822	6.85225	26.7896	48.9099	39.8345	NA	NA	NA	NA	NA
comp2244784_c0_seq1	10.6523	4.88448	7.25429	13.8402	19.1742	18.7279	6.44983	6.6842	NA	NA	NA	NA	NA
comp2244840_c0_seq1	66.954	172.429	105.148	57.219	37.9224	121.324	191.397	129.574	ref|XP_013386016.1| PREDICTED: monocarboxylate transporter 13-like isoform X3 [Lingula anatina] ref|XP_013386017.1| PREDICTED: monocarboxylate transporter 13-like isoform X3 [Lingula anatina]	5e-47	35	52	6
comp2244843_c0_seq4	1.28783	0.58016	118.369	4.33553	0.42618	0.421111	0.275015	16.9073	NA	NA	NA	NA	NA
comp2244884_c0_seq1	20.9826	32.0668	29.6038	69.0413	54.6034	39.7559	35.1092	33.9086	gb|ELT95030.1| hypothetical protein CAPTEDRAFT_217017 [Capitella teleta]	7e-40	33	56	6
comp2244889_c0_seq1	22.9437	22.4605	16.5865	3.27553	5.81883	20.8199	22.6963	21.2558	NA	NA	NA	NA	NA
comp2244907_c1_seq1	7.65056	5.88984	7.07753	0	1.54364	2.62457	2.67488	5.3328	NA	NA	NA	NA	NA
comp2244915_c0_seq2	797.191	743.008	635.05	400.623	249.165	923.969	855.601	799.188	ref|XP_013407087.1| PREDICTED: H/ACA ribonucleoprotein complex subunit 2-like protein [Lingula anatina]	2e-52	64	81	1
comp2244954_c0_seq2	38.7188	26.6588	23.9528	79.8598	75.4262	38.7832	26.8069	24.0429	ref|XP_006820442.1| PREDICTED: uncharacterized protein LOC102805810 [Saccoglossus kowalevskii]	1e-60	36	54	3
comp2244959_c0_seq2	549.888	510.727	401.464	166.532	244.823	584.84	492.184	563.518	ref|XP_007246738.1| PREDICTED: GPALPP motifs-containing protein 1 isoform X2 [Astyanax mexicanus]	3e-29	36	53	18
comp2244969_c0_seq2	31.7218	52.0424	59.5905	15.671	26.0975	34.7979	42.1816	55.3173	NA	NA	NA	NA	NA
comp2244978_c1_seq1	63.2089	76.6515	87.3745	16.3449	19.3355	56.9119	77.6966	81.4969	ref|XP_002427164.1| conserved hypothetical protein [Pediculus humanus corporis] gb|EEB14426.1| conserved hypothetical protein [Pediculus humanus corporis]	2e-06	31	43	28
comp2244979_c0_seq3	28.2687	13.1017	24.8064	94.2418	96.9086	38.009	23.5706	29.7013	NA	NA	NA	NA	NA
comp2245003_c0_seq1	703.901	897.199	756.03	3530.24	1902.42	682.602	553.127	613.635	ref|XP_013412744.1| PREDICTED: retinol dehydrogenase 13-like [Lingula anatina]	2e-77	52	67	1
comp2245011_c1_seq2	87.2686	109.217	168.494	53.0458	52.1241	75.2992	182.449	125.293	NA	NA	NA	NA	NA
comp2245017_c0_seq1	77.4492	139.23	64.1303	166.658	22.6176	69.8427	96.4779	48.6571	gb|EKC21132.1| hypothetical protein CGI_10004536 [Crassostrea gigas]	3e-17	47	62	9
comp2245053_c0_seq1	89.4131	263.543	250.145	12.6506	34.6942	93.0376	194.153	192.8	gb|EYB95032.1| hypothetical protein Y032_0164g3524 [Ancylostoma ceylanicum]	4e-12	27	47	9
comp2245060_c0_seq2	1524.07	1360.05	868.227	366.166	829.561	252.941	1032.8	949.365	NA	NA	NA	NA	NA
comp2245073_c0_seq1	303.843	384.467	308.826	273.742	163.59	416.007	375.763	312.986	ref|XP_013071602.1| PREDICTED: tyrosine--tRNA ligase, cytoplasmic-like [Biomphalaria glabrata] ref|XP_013071603.1| PREDICTED: tyrosine--tRNA ligase, cytoplasmic-like [Biomphalaria glabrata] ref|XP_013	0	72	86	1
comp2245081_c0_seq1	186.967	120.215	150.185	358.165	308.508	267.967	153.763	129.453	ref|XP_005109996.1| PREDICTED: nucleoside diphosphate kinase homolog 5-like [Aplysia californica]	8e-124	77	91	1
comp2245096_c0_seq1	97.4317	206.602	130.519	22.349	13.6845	72.1829	158.861	156.41	gb|AIR07876.1| apextrin-like protein 1 [Branchiostoma japonicum]	3e-64	54	70	3
comp2245157_c0_seq2	11.8777	12.1111	15.3093	0.834915	2.396	9.81863	16.6516	11.3706	NA	NA	NA	NA	NA
comp2245160_c0_seq2	700.398	879.354	1020.15	656.845	625.19	769.902	872.679	815.15	gb|ELU13730.1| hypothetical protein CAPTEDRAFT_169207 [Capitella teleta]	1e-115	44	63	5
comp2245167_c0_seq2	16.007	28.6111	27.5224	7.96308	8.14437	12.1286	32.6458	24.9659	ref|XP_013925592.1| PREDICTED: deoxyribonuclease-1-like 2 [Thamnophis sirtalis] ref|XP_013925596.1| PREDICTED: deoxyribonuclease-1-like 2 [Thamnophis sirtalis]	2e-56	42	58	6
comp2245194_c0_seq1	25.3581	21.9341	31.0139	1.54158	7.62756	19.3481	17.5344	21.8781	NA	NA	NA	NA	NA
comp2245203_c0_seq1	22.2547	27.773	15.0494	406.565	525.485	36.6128	22.7828	24.3616	gb|ELU12892.1| hypothetical protein CAPTEDRAFT_198692 [Capitella teleta]	4e-27	29	49	9
comp2245223_c0_seq1	75.9343	76.8116	92.9657	217.235	188.768	78.8923	56.3376	80.5364	ref|XP_011442806.1| PREDICTED: uncharacterized protein C7orf57-like [Crassostrea gigas] gb|EKC35705.1| Uncharacterized protein C7orf57-like protein [Crassostrea gigas]	5e-43	34	52	16
comp2245244_c0_seq1	6.83214	2.60964	3.88369	0.417457	0.42618	3.08664	3.64473	2.06891	ref|XP_011427505.1| PREDICTED: glioma pathogenesis-related protein 1-like [Crassostrea gigas] ref|XP_011427506.1| PREDICTED: glioma pathogenesis-related protein 1-like [Crassostrea gigas]	2e-25	42	55	8
comp2245246_c0_seq1	6.838	9.33115	7.19521	0.417457	1.54364	16.8382	7.95807	3.97779	gb|AAA72974.1| pancreatic DNAase I [synthetic construct]	3e-33	31	52	8
comp2245256_c0_seq2	256.379	232.296	195.358	136.672	153.007	236.124	180.749	246.548	gb|ELU09197.1| hypothetical protein CAPTEDRAFT_224390 [Capitella teleta]	2e-23	33	59	0
comp2245319_c0_seq1	110.399	250.007	239.313	108.243	61.2107	82.9924	232.852	119.657	NA	NA	NA	NA	NA
comp2245322_c0_seq1	27.4053	35.2176	35.3955	11.5278	15.7584	36.8827	34.0529	26.3176	ref|XP_002739412.1| PREDICTED: uncharacterized protein LOC100367895 [Saccoglossus kowalevskii]	1e-53	47	68	1
comp2245323_c0_seq2	171.862	306.373	316.857	808.453	1138.05	148.261	282.003	289.2	gb|ELU07267.1| hypothetical protein CAPTEDRAFT_220394 [Capitella teleta]	1e-169	58	70	8
comp2245323_c1_seq1	96.2203	159.536	167.9	462.554	545.373	104.204	158.282	155.193	ref|XP_013384727.1| PREDICTED: ubiquitin carboxyl-terminal hydrolase 25-like [Lingula anatina]	5e-42	33	55	3
comp2245332_c0_seq1	53.7736	24.2744	30.709	98.7383	83.0761	56.4607	32.2695	35.7708	NA	NA	NA	NA	NA
comp2245333_c0_seq1	92.7482	88.4993	42.3431	25.8182	28.5971	109.425	65.1063	62.2925	NA	NA	NA	NA	NA
comp2245335_c0_seq1	24.5893	182.36	164.331	7.54562	1.70472	28.2385	97.6916	123.832	NA	NA	NA	NA	NA
comp2245338_c0_seq1	40.8737	23.4234	40.6759	0	5.23156	24.1171	29.3949	27.4928	gb|ELU04271.1| hypothetical protein CAPTEDRAFT_221804 [Capitella teleta]	4e-14	32	45	11
comp2245343_c0_seq1	889.248	831.161	769.765	506.774	473.949	916.588	700.58	767.643	ref|XP_002117636.1| hypothetical protein TRIADDRAFT_51090 [Trichoplax adhaerens] gb|EDV19894.1| hypothetical protein TRIADDRAFT_51090 [Trichoplax adhaerens]	1e-51	87	90	0
comp2245355_c0_seq4	2656.74	3112.2	3377.83	5376.66	4716.91	2943.99	3147.24	3641.44	gb|ELT96170.1| hypothetical protein CAPTEDRAFT_177943 [Capitella teleta]	0	71	81	3
comp2245360_c2_seq1	7.03037	4.81776	3.77967	86.9645	53.0303	4.10332	2.08434	7.1192	ref|XP_002596251.1| hypothetical protein BRAFLDRAFT_65994 [Branchiostoma floridae] gb|EEN52263.1| hypothetical protein BRAFLDRAFT_65994 [Branchiostoma floridae]	2e-158	49	68	4
comp2245366_c0_seq2	8.07279	31.7972	33.0524	4.68755	3.93285	10.3328	26.8561	15.9612	ref|XP_013877342.1| PREDICTED: somatostatin receptor type 2 [Austrofundulus limnaeus]	2e-20	32	54	6
comp2245379_c0_seq2	245.822	299.983	324.486	175.011	177.892	287.072	264.019	302.451	gb|ELU01031.1| hypothetical protein CAPTEDRAFT_186578 [Capitella teleta]	2e-74	34	50	11
comp2245391_c0_seq1	216.963	264.832	377.017	58.8901	50.9733	162.539	181.062	237.339	gb|EPY81566.1| calmodulin-like protein [Camelus ferus]	2e-88	89	95	0
comp2245392_c0_seq1	40.6962	59.624	70.548	42.095	31.7614	64.5839	60.9378	58.4296	NA	NA	NA	NA	NA
comp2245426_c0_seq2	293.43	413.993	534.198	465.59	576.86	264.247	455.45	447.088	gb|ELT98792.1| hypothetical protein CAPTEDRAFT_170059 [Capitella teleta]	5e-84	53	66	6
comp2245442_c0_seq1	13.2957	10.9481	9.46183	82.5897	62.419	10.4315	13.4121	12.1141	ref|XP_009049303.1| hypothetical protein LOTGIDRAFT_231021 [Lottia gigantea] gb|ESP00112.1| hypothetical protein LOTGIDRAFT_231021 [Lottia gigantea]	6e-65	47	64	3
comp2245484_c0_seq2	19.0292	51.2871	37.8032	3.9822	5.0569	24.9932	38.6266	43.5166	ref|XP_009045687.1| hypothetical protein LOTGIDRAFT_224237 [Lottia gigantea] gb|ESP03599.1| hypothetical protein LOTGIDRAFT_224237 [Lottia gigantea]	4e-07	58	70	0
comp2245492_c0_seq2	34.6005	86.775	83.4776	18.7215	8.81547	48.1651	71.5653	71.8056	gb|ELT91171.1| hypothetical protein CAPTEDRAFT_160180 [Capitella teleta]	1e-74	46	63	3
comp2245511_c0_seq1	33390.7	26261.9	24286.5	20881.2	14740.9	31710.1	31459.1	28245.5	gb|ABW23225.1| ribosomal protein rpl26 [Eurythoe complanata]	5e-83	87	97	1
comp2245540_c0_seq1	401.53	320.179	220.486	185.456	215.164	473.238	277.857	245.497	NA	NA	NA	NA	NA
comp2245547_c0_seq2	46.7764	35.585	41.0458	15.4145	19.7617	46.3901	45.0391	46.2421	gb|AFS60116.1| selenoprotein M [Penaeus monodon]	2e-12	43	71	0
comp2245555_c0_seq2	39.3653	26.7649	25.7001	16.2808	15.4294	47.3843	27.5885	28.9822	ref|XP_013404160.1| PREDICTED: mucin-17-like [Lingula anatina]	3e-06	33	49	5
comp2245564_c0_seq1	91.4342	171.248	200.041	66.212	39.5033	95.4814	121.606	124.507	ref|XP_013790827.1| PREDICTED: uncharacterized protein LOC106474682 [Limulus polyphemus]	1e-41	29	49	7
comp2245570_c0_seq1	6.23124	7.23772	6.69446	16.6355	30.4128	3.69007	5.34115	2.19569	NA	NA	NA	NA	NA
comp2245581_c0_seq1	70.8528	91.7581	80.8346	27.7786	31.5939	68.046	85.2435	78.0592	NA	NA	NA	NA	NA
comp2245603_c0_seq1	54278.5	40684.5	41773.2	26695	20082	43608.4	51877	49969.5	gb|ABW23167.1| ribosomal protein rpl12 [Arenicola marina]	4e-96	85	93	0
comp2245616_c0_seq2	24.2356	26.077	22.7366	154.335	121.839	29.4691	25.0759	19.2208	ref|XP_008469828.1| PREDICTED: glycosyltransferase-like protein LARGE2 [Diaphorina citri]	1e-32	31	52	4
comp2245625_c0_seq3	21.3958	11.724	15.0021	72.8652	88.7917	11.8701	11.0035	22.0161	NA	NA	NA	NA	NA
comp2245628_c0_seq2	128.229	130.312	119.199	251.758	229.318	109.654	117.102	133.971	ref|XP_002591720.1| hypothetical protein BRAFLDRAFT_223476 [Branchiostoma floridae] gb|EEN47731.1| hypothetical protein BRAFLDRAFT_223476, partial [Branchiostoma floridae]	7e-105	56	77	0
comp2245652_c0_seq1	22.7991	9.54513	18.4225	6.77615	7.18121	20.3467	11.7707	4.53889	NA	NA	NA	NA	NA
comp2245655_c0_seq1	88.1034	228.328	236.609	58.7632	69.593	102.188	195.707	339.93	ref|XP_002587334.1| hypothetical protein BRAFLDRAFT_61459 [Branchiostoma floridae] gb|EEN43345.1| hypothetical protein BRAFLDRAFT_61459 [Branchiostoma floridae]	1e-50	30	49	6
comp2245660_c0_seq4	17.4482	34.1012	38.702	0.77079	9.0604	15.3406	39.1163	21.9783	NA	NA	NA	NA	NA
comp2245687_c1_seq1	104.58	352.363	310.013	324.371	358.882	121.682	298.217	341.234	ref|XP_012941843.1| PREDICTED: uncharacterized protein LOC101858907 [Aplysia californica]	5e-05	24	45	10
comp2245694_c0_seq1	4.74447	12.928	15.6231	2.02316	2.99665	7.93051	11.2931	6.20673	ref|XP_012874374.1| PREDICTED: serpin B4-like [Dipodomys ordii]	4e-23	37	60	1
comp2245713_c0_seq1	42.1189	98.283	112.1	26.6858	34.9962	34.2962	77.4331	111.096	gb|ELU16042.1| hypothetical protein CAPTEDRAFT_114809, partial [Capitella teleta]	3e-52	42	64	1
comp2245721_c0_seq1	23.4061	41.3475	33.7699	2.44062	8.31186	48.3781	49.3091	60.9178	gb|ELU14596.1| hypothetical protein CAPTEDRAFT_180550 [Capitella teleta]	5e-21	38	58	2
comp2245730_c0_seq1	1209.6	1286.27	1221.12	2260	1964.43	1382.18	1385.91	1272.65	ref|XP_005093121.1| PREDICTED: ADP-ribosylation factor-like protein 8A [Aplysia californica]	5e-121	95	98	0
comp2245738_c0_seq2	30.855	54.1765	56.0445	122.737	133.168	42.1818	43.9939	44.6161	ref|XP_013401022.1| PREDICTED: ras GTPase-activating protein 3-like isoform X2 [Lingula anatina]	0	56	75	2
comp2245756_c0_seq1	17.545	39.7133	21.6392	0.834915	8.9061	15.4037	26.7403	8.50845	NA	NA	NA	NA	NA
comp2245763_c0_seq1	133.206	126.485	123.82	35.2587	43.5873	139.985	147.431	129.536	NA	NA	NA	NA	NA
comp2245767_c0_seq1	77.8941	66.4063	59.2362	387.749	477.476	56.4916	106.296	79.4602	NA	NA	NA	NA	NA
comp2245787_c0_seq1	485.216	481.22	497.648	1130.59	1302.41	339.127	503.929	458.938	NA	NA	NA	NA	NA
comp2245788_c0_seq1	193.314	174.161	241.772	39.5615	129.133	158.458	222.809	228.838	NA	NA	NA	NA	NA
comp2245794_c0_seq1	141.463	150.256	169.076	276.359	303.485	150.667	162.418	183.54	gb|ELU07848.1| hypothetical protein CAPTEDRAFT_121888 [Capitella teleta]	7e-151	64	76	6
comp2245797_c0_seq4	32.804	71.0676	48.9621	0	12.3489	52.1572	63.1406	68.894	NA	NA	NA	NA	NA
comp2245798_c0_seq1	3.46285	6.86722	4.74656	33.8808	68.1136	4.79807	4.97348	6.56927	NA	NA	NA	NA	NA
comp2245808_c0_seq1	189.807	165.294	159.597	123.431	78.5969	212.149	178.144	161.926	ref|XP_014769608.1| PREDICTED: peroxisomal trans-2-enoyl-CoA reductase-like isoform X1 [Octopus bimaculoides]	2e-112	60	78	1
comp2245811_c0_seq1	2225.18	2287.13	1662.61	704.137	673.119	2094.57	2099.72	2273.58	ref|XP_009063536.1| hypothetical protein LOTGIDRAFT_235760 [Lottia gigantea] gb|ESO85805.1| hypothetical protein LOTGIDRAFT_235760 [Lottia gigantea]	1e-38	77	90	0
comp2245845_c0_seq1	132.051	109.622	119.69	219.616	215.951	142.765	131.574	108.284	NA	NA	NA	NA	NA
comp2245847_c0_seq3	54.9951	91.7519	94.5772	21.5494	23.7717	42.2186	76.7439	85.6901	NA	NA	NA	NA	NA
comp2245862_c0_seq1	72.2888	62.5388	49.4232	26.042	19.245	67.3882	63.5116	48.5224	ref|XP_011438901.1| PREDICTED: DNA-directed RNA polymerases I and III subunit RPAC2-like [Crassostrea gigas]	1e-25	69	85	0
comp2245865_c0_seq1	306.457	285.284	294.898	499.756	551.211	363.231	295.715	269.562	ref|XP_011446972.1| PREDICTED: nucleoside diphosphate kinase 7-like [Crassostrea gigas]	1e-176	63	80	1
comp2245875_c0_seq2	29.1004	40.9666	37.5222	14.8047	18.8255	32.1992	34.7621	38.1094	ref|XP_009061037.1| hypothetical protein LOTGIDRAFT_219426 [Lottia gigantea] gb|ESO88325.1| hypothetical protein LOTGIDRAFT_219426 [Lottia gigantea]	2e-27	38	60	3
comp2245928_c0_seq1	11.4934	3.59841	10.0532	0.417457	0	6.46775	5.86511	7.67534	gb|EGI58441.1| Acetylcholine receptor subunit alpha-like protein [Acromyrmex echinatior]	1e-13	51	80	0
comp2245942_c0_seq1	31.623	21.6162	23.4205	8.25361	12.406	29.2527	17.7893	24.0962	gb|ELU03240.1| hypothetical protein CAPTEDRAFT_211181 [Capitella teleta]	8e-14	43	67	2
comp2245947_c0_seq1	10.1225	66.3322	74.3419	28.5794	20.6006	9.23778	51.8593	55.0367	NA	NA	NA	NA	NA
comp2245950_c0_seq1	9.81154	4.47587	4.60308	24.9179	14.8086	11.1188	7.43993	6.54853	NA	NA	NA	NA	NA
comp2245955_c0_seq1	3191.16	2975.71	2480.99	1559.13	1195.89	3384.55	2587.86	2899.12	gb|KPM05062.1| small nuclear ribonucleoprotein Sm D3-like protein [Sarcoptes scabiei]	7e-52	87	93	0
comp2245969_c0_seq1	1881.26	1355.54	1361.85	866.531	1106.79	2026.5	1392	1416.34	NA	NA	NA	NA	NA
comp2245975_c0_seq1	24.2084	21.5914	23.2301	4.88124	6.2516	30.8747	37.6278	25.3719	NA	NA	NA	NA	NA
comp2245998_c0_seq3	106.995	92.7093	79.8965	43.9586	22.7653	122.937	66.8087	75.3564	gb|ELU08936.1| hypothetical protein CAPTEDRAFT_178354 [Capitella teleta]	6e-43	39	53	5
comp2246011_c0_seq1	8.5939	16.5787	21.3075	20.7446	38.0371	14.4218	13.276	6.48992	gb|ELT98865.1| hypothetical protein CAPTEDRAFT_153818 [Capitella teleta]	4e-95	64	83	0
comp2246014_c0_seq3	31.1686	18.7578	37.1401	51.3419	11.463	6.48534	30.5787	45.5585	NA	NA	NA	NA	NA
comp2246028_c0_seq1	13.3259	19.3522	22.644	28.9995	46.7887	17.1475	13.884	17.6359	NA	NA	NA	NA	NA
comp2246057_c0_seq1	1.43684	6.3599	5.18075	12.4596	13.3755	5.27895	3.43335	10.2089	gb|AFE86409.1| hypothetical protein SSP002_082 [Vibrio phage SSP002]	2e-22	61	71	1
comp2246062_c0_seq1	23.443	39.9726	60.2499	16.5687	12.5804	19.6848	21.5264	36.13	NA	NA	NA	NA	NA
comp2246063_c0_seq1	247.64	192.425	238.269	136.343	48.3925	226.98	189.371	207.1	NA	NA	NA	NA	NA
comp2246072_c0_seq1	175.396	114.272	67.0779	56.6131	34.8425	145.24	201.648	53.3662	NA	NA	NA	NA	NA
comp2246085_c0_seq1	67.4196	64.6353	58.7274	35.4838	34.4996	123.665	59.5225	38.2747	NA	NA	NA	NA	NA
comp2246094_c0_seq1	27.8632	18.6831	20.1326	91.194	81.479	29.0108	22.8265	13.7849	gb|ELU14987.1| hypothetical protein CAPTEDRAFT_219172 [Capitella teleta]	3e-18	48	65	0
comp2246100_c0_seq3	82.9247	23.3835	27.9452	0.834915	17.2249	33.4725	44.8885	54.9105	NA	NA	NA	NA	NA
comp2246101_c1_seq1	79.8818	169.462	141.183	39.8534	25.3791	71.0773	129.698	94.0681	gb|EKC18365.1| Histone-lysine N-methyltransferase PRDM9 [Crassostrea gigas]	4e-28	42	59	1
comp2246102_c0_seq1	48.8651	111.453	147.791	12.169	6.42607	90.146	172.717	107.913	gb|ABY87377.1| unknown protein 9 [Haliotis diversicolor]	4e-07	34	49	11
comp2246130_c0_seq1	20.984	25.3847	37.1731	9.37509	6.67119	9.02927	20.4033	39.0745	NA	NA	NA	NA	NA
comp2246133_c0_seq1	49.0316	49.969	77.4518	21.6122	24.6509	60.3987	38.676	43.6921	NA	NA	NA	NA	NA
comp2246143_c0_seq1	48.9533	15	19.5234	115.163	194.121	16.0009	32.351	48.7489	NA	NA	NA	NA	NA
comp2246174_c0_seq1	84.5659	67.1399	62.0811	37.342	30.7282	124.794	95.8363	45.8018	ref|XP_014670993.1| PREDICTED: 60S ribosome subunit biogenesis protein NIP7 homolog isoform X1 [Priapulus caudatus] ref|XP_014670994.1| PREDICTED: 60S ribosome subunit biogenesis protein NIP7 homolog	8e-112	82	94	0
comp2246178_c0_seq1	35.7724	23.1172	24.3654	29.6067	47.3593	192.03	33.2656	32.7907	gb|ELT95476.1| hypothetical protein CAPTEDRAFT_21103 [Capitella teleta]	2e-15	71	87	0
comp2246185_c0_seq2	18.0859	25.2137	27.1545	42.1644	41.5063	13.2137	25.5736	19.4898	NA	NA	NA	NA	NA
comp2246196_c0_seq1	12.3452	9.51533	9.32231	51.3118	24.2952	11.9209	11.0442	14.7731	ref|XP_015182028.1| PREDICTED: thyrotropin-releasing hormone receptor [Polistes dominula]	1e-12	26	47	10
comp2246209_c0_seq3	18.0981	8.09918	8.31199	1.6057	6.7752	13.1924	7.45723	8.76563	NA	NA	NA	NA	NA
comp2246233_c0_seq2	845.945	812.137	727.102	153.72	242.885	604.363	850.348	685.52	NA	NA	NA	NA	NA
comp2246244_c0_seq1	82.1009	123.378	110.821	1113.09	985.532	64.8048	112.235	66.9569	ref|XP_012681422.1| PREDICTED: von Willebrand factor C domain-containing protein 2-like [Clupea harengus]	4e-10	36	47	11
comp2246254_c0_seq1	48.9474	141.89	146.021	11.5278	13.2851	21.897	68.5399	72.295	ref|XP_011447220.1| PREDICTED: cysteine-rich venom protein latisemin-like [Crassostrea gigas]	2e-46	37	52	18
comp2246287_c0_seq3	38.5239	37.1945	24.3497	214.117	183.857	47.1403	35.4365	33.0265	emb|CBN80858.1| Protein shisa-5 [Dicentrarchus labrax]	2e-05	33	48	10
comp2246288_c0_seq1	102.419	110.367	127.346	26.0747	45.3829	82.6257	93.2307	108.865	gb|ELU09831.1| hypothetical protein CAPTEDRAFT_222545 [Capitella teleta]	2e-101	82	94	0
comp2246299_c0_seq1	14.4751	18.0821	26.2504	282.79	465.235	25.6917	21.0285	19.0562	ref|XP_014791048.1| PREDICTED: homeodomain-only protein-like [Octopus bimaculoides]	4e-19	51	69	0
comp2246330_c0_seq1	33.1868	61.9788	47.4908	0.77079	9.86247	60.1524	31.5373	17.6791	NA	NA	NA	NA	NA
comp2246345_c0_seq1	11.6165	15.011	14.5339	26.0433	33.0334	17.7418	21.6858	12.9881	NA	NA	NA	NA	NA
comp2246406_c0_seq1	89.0491	134.427	136.663	72.6688	54.4429	108.584	170.362	131.455	gb|ELU09773.1| hypothetical protein CAPTEDRAFT_100731, partial [Capitella teleta]	3e-106	41	61	4
comp2246407_c0_seq8	14.1864	7.39881	8.59719	19.3967	27.5905	6.70171	16.6052	4.36174	NA	NA	NA	NA	NA
comp2246430_c0_seq1	3.37995	27.9181	24.785	26.3599	22.1243	68.3519	39.5475	8.09782	gb|ELU07389.1| hypothetical protein CAPTEDRAFT_21345 [Capitella teleta]	1e-119	67	80	0
comp2246432_c0_seq1	657.477	498.962	326.101	44.0908	92.6344	548.075	550.995	325.363	NA	NA	NA	NA	NA
comp2246434_c0_seq3	189.629	274.231	258.725	115.735	106.627	215.011	236.45	236.373	NA	NA	NA	NA	NA
comp2246451_c0_seq1	55.8689	26.9398	29.2148	5.78028	5.14093	49.7367	17.5461	24.1245	NA	NA	NA	NA	NA
comp2246453_c0_seq1	442.376	1069.72	824.092	95.3071	24.8052	756.671	918.184	987.581	NA	NA	NA	NA	NA
comp2246466_c0_seq1	68.6181	44.2307	38.825	182.866	106.488	334.954	48.9823	56.4125	ref|WP_026390740.1| hypothetical protein [Acholeplasma axanthum]	5e-07	53	62	2
comp2246491_c0_seq2	255.003	386.447	378.568	47.2694	32.1742	358.708	248.548	216.043	gb|KPP63808.1| hypothetical protein Z043_117899, partial [Scleropages formosus]	1e-32	53	72	1
comp2246503_c0_seq1	11.7607	19.0352	16.6163	33.3023	44.3551	11.4626	9.73853	8.93916	NA	NA	NA	NA	NA
comp2246519_c0_seq2	40.5177	48.4994	57.5488	12.139	17.6441	36.4414	28.347	47.3462	gb|ELU09582.1| hypothetical protein CAPTEDRAFT_185200 [Capitella teleta]	5e-25	34	57	1
comp2246565_c0_seq1	93.1938	86.8856	109.539	12.8443	28.1845	84.6368	93.5662	96.4778	ref|XP_006868492.1| PREDICTED: histone-lysine N-methyltransferase PRDM9-like [Chrysochloris asiatica]	2e-23	42	55	2
comp2246570_c0_seq1	36.8841	25.9326	22.7483	93.0274	70.8851	37.4776	35.6798	35.5248	NA	NA	NA	NA	NA
comp2246597_c0_seq1	35.8068	17.6372	12.577	5.71615	5.47649	11.6513	9.9295	11.3245	ref|XP_014771073.1| PREDICTED: polycystic kidney disease protein 1-like 2, partial [Octopus bimaculoides] gb|KOF90429.1| hypothetical protein OCBIM_22011243mg, partial [Octopus bimaculoides]	9e-52	34	54	9
comp2246605_c0_seq1	8238.67	5461.84	5898.57	1834.85	2010.33	6684.99	4593.8	6119.45	ref|XP_010714218.1| PREDICTED: E-selectin-like [Meleagris gallopavo]	3e-05	39	49	6
comp2246609_c0_seq1	161.919	186.289	217.404	67.0182	78.1104	176.297	154.046	235.141	ref|XP_013382135.1| PREDICTED: lipase maturation factor 1-like [Lingula anatina]	0	61	76	4
comp2246624_c0_seq1	270.599	218.58	188.644	94.0299	142.767	260.576	223.603	213.703	NA	NA	NA	NA	NA
comp2246633_c0_seq1	396.684	287.419	250.167	207.493	199.61	398.422	314.479	292.044	ref|XP_007904540.1| PREDICTED: splicing factor 3B subunit 5 [Callorhinchus milii]	9e-51	88	95	0
comp2246635_c0_seq1	44.0578	277.457	193.229	42.0937	33.2983	170.695	173.068	122.918	NA	NA	NA	NA	NA
comp2246640_c0_seq1	39.8916	112.134	67.1563	116.149	112.54	72.6814	69.9612	64.1685	NA	NA	NA	NA	NA
comp2246646_c0_seq1	843.187	659.385	697.028	629.544	382.38	985.553	671.792	641.792	ref|XP_002109901.1| hypothetical protein TRIADDRAFT_21313 [Trichoplax adhaerens] gb|EDV28067.1| hypothetical protein TRIADDRAFT_21313 [Trichoplax adhaerens]	3e-47	69	77	0
comp2246658_c0_seq3	384.606	337.495	457.453	51.0567	18.567	140.289	618.168	379.268	NA	NA	NA	NA	NA
comp2246670_c0_seq1	924.715	823.044	866.75	4271.04	5508	894.684	1031.46	1331.1	NA	NA	NA	NA	NA
comp2246681_c1_seq1	0.124927	2.46022	0	0	1.62748	0.572673	1.67034	1.43141	NA	NA	NA	NA	NA
comp2246689_c0_seq2	56.819	44.3039	40.1946	10.6942	23.6109	45.5731	35.5207	47.7492	ref|XP_007229099.1| PREDICTED: RB-associated KRAB zinc finger protein-like isoform X2 [Astyanax mexicanus]	2e-12	42	58	0
comp2246734_c0_seq1	112.881	78.474	82.9716	41.073	38.4021	106.106	101.383	102.468	ref|XP_002736531.1| PREDICTED: arylacetamide deacetylase-like [Saccoglossus kowalevskii]	7e-19	34	53	11
comp2246744_c0_seq1	38.5125	50.7985	59.2564	95.8567	70.4827	45.9778	58.0748	37.4357	NA	NA	NA	NA	NA
comp2246784_c0_seq1	15.8146	16.5971	13.0921	37.7334	43.4629	14.5786	15.0912	15.3513	NA	NA	NA	NA	NA
comp2246787_c0_seq1	20.5745	26.5607	24.8042	3.9822	10.8825	19.0004	20.8898	20.6848	ref|XP_003727036.1| PREDICTED: RNA-directed DNA polymerase from mobile element jockey-like [Strongylocentrotus purpuratus]	5e-62	52	68	1
comp2246788_c0_seq4	89.1645	107.987	118.728	652.186	413.555	64.4277	209.077	102.132	pdb|4HLL|A Chain A, Crystal Structure Of Artificial Ankyrin Repeat Protein_ank(gag)1d4	4e-18	45	59	5
comp2246799_c0_seq2	6.84146	12.0173	14.98	55.9719	38.4701	7.51928	8.92783	12.1309	NA	NA	NA	NA	NA
comp2246807_c0_seq1	13.0961	17.889	14.2926	79.5091	78.4223	10.494	13.4294	11.4684	gb|AIT11645.1| neuropsin, partial [Platynereis dumerilii]	2e-47	42	64	0
comp2246811_c0_seq5	61.2712	66.4044	73.5511	469.738	276.964	54.5744	71.5125	84.3196	ref|XP_014671564.1| PREDICTED: failed axon connections-like isoform X3 [Priapulus caudatus]	2e-38	35	56	3
comp2246829_c0_seq1	24.9628	3.46991	16.7106	0.77079	2.05366	19.2967	8.17232	8.78275	ref|XP_009014107.1| hypothetical protein HELRODRAFT_75868, partial [Helobdella robusta] gb|ESO07496.1| hypothetical protein HELRODRAFT_75868, partial [Helobdella robusta]	2e-10	42	61	4
comp2246831_c0_seq2	37.8891	18.7391	31.1416	2.44062	15.5066	32.0866	27.9185	37.4439	NA	NA	NA	NA	NA
comp2246840_c0_seq1	59.3756	42.1235	41.597	19.203	15.7649	62.3253	43.554	46.1979	gb|EGI70836.1| Beta-1,3-galactosyltransferase 1 [Acromyrmex echinatior]	4e-05	37	54	4
comp2246862_c0_seq1	81.2602	134.224	124.117	35.8699	39.4529	79.6954	115.249	135.539	NA	NA	NA	NA	NA
comp2246879_c0_seq1	17.7195	30.1337	34.2417	8.60562	9.49336	20.037	27.3742	15.518	ref|XP_013385098.1| PREDICTED: tyrosine-protein phosphatase 10D-like isoform X3 [Lingula anatina]	2e-05	28	45	3
comp2246889_c0_seq8	4756.34	6491.51	6142.63	8792.6	9851.11	5096.67	6754.81	5881.93	ref|XP_011432103.1| PREDICTED: syntenin-1-like [Crassostrea gigas] ref|XP_011432104.1| PREDICTED: syntenin-1-like [Crassostrea gigas]	6e-110	61	74	3
comp2246890_c0_seq1	17.1682	24.7114	24.3779	11.6875	2.57047	15.0202	36.0387	38.8279	ref|XP_002601327.1| hypothetical protein BRAFLDRAFT_82774 [Branchiostoma floridae] gb|EEN57339.1| hypothetical protein BRAFLDRAFT_82774 [Branchiostoma floridae]	3e-35	54	69	1
comp2246896_c0_seq1	28.7522	94.9676	76.9176	8.86344	7.26505	19.1036	82.6847	91.7512	gb|ELU05611.1| hypothetical protein CAPTEDRAFT_217455 [Capitella teleta]	3e-43	33	51	4
comp2246905_c1_seq1	24.339	16.4725	13.0918	37.5711	39.3956	23.0824	16.1305	17.0245	NA	NA	NA	NA	NA
comp2246930_c0_seq1	35.3449	29.0827	25.997	13.5523	18.1476	38.4941	27.6117	20.7856	NA	NA	NA	NA	NA
comp2246940_c0_seq1	23.0336	12.6473	17.0837	6.35869	4.78521	19.4325	19.3755	15.8812	NA	NA	NA	NA	NA
comp2246956_c0_seq1	167.055	312.29	292.178	65.3784	22.3253	291.455	309.471	239.973	NA	NA	NA	NA	NA
comp2246959_c0_seq1	28108	21890.5	21426.4	18098.4	12170.7	27989.1	26606.1	26147.3	ref|NP_001292305.1| 40S ribosomal protein S5 [Crassostrea gigas] ref|XP_011455366.1| PREDICTED: 40S ribosomal protein S5 [Crassostrea gigas] dbj|BAE16013.1| ribosomal protein S5 [Crassostrea gigas]	6e-132	90	96	0
comp2246960_c0_seq1	29.2738	20.6985	19.3695	57.2203	48.8822	48.7478	27.244	22.4054	gb|AKQ62997.1| achatin receptor 1 [Platynereis dumerilii]	8e-07	21	43	14
comp2246980_c0_seq1	11.3557	14.4428	25.0254	1.54158	5.65095	13.9425	7.23436	12.2534	NA	NA	NA	NA	NA
comp2246985_c0_seq1	1042.85	910.557	974.239	244.45	311.255	1164.45	729.12	826.955	NA	NA	NA	NA	NA
comp2246986_c1_seq2	11.5429	10.4161	7.93842	0	2.99665	11.3212	14.1852	7.06815	NA	NA	NA	NA	NA
comp2246994_c0_seq1	446.037	328.492	508.683	178.085	194.396	336.88	441.553	510.089	ref|XP_005096932.1| PREDICTED: doublesex and mab-3 related transcription factor 3, truncated-like [Aplysia californica] ref|XP_005096933.1| PREDICTED: doublesex and mab-3 related transcription factor	1e-91	44	54	13
comp2246998_c0_seq1	135.44	170.882	143.558	303.414	227.565	176.552	172.326	162.319	ref|XP_013416680.1| PREDICTED: WASH complex subunit CCDC53-like [Lingula anatina]	3e-59	55	70	8
comp2246999_c0_seq1	1063.99	1443.31	1373.2	2366.62	3212.51	977.845	1726.68	1364.1	ref|XP_009048105.1| hypothetical protein LOTGIDRAFT_230729 [Lottia gigantea] gb|ESP01471.1| hypothetical protein LOTGIDRAFT_230729 [Lottia gigantea]	1e-105	55	69	6
comp2247021_c0_seq1	65.232	106.422	100.804	88.718	61.5335	94.5217	115.872	109.341	ref|XP_013384795.1| PREDICTED: dehydrogenase/reductase SDR family protein 7-like [Lingula anatina]	7e-109	57	77	1
comp2247023_c0_seq1	28.9255	11.7772	10.3031	5.52246	6.40609	8.50823	11.0179	13.427	NA	NA	NA	NA	NA
comp2247049_c0_seq3	136.166	117.14	109.555	30.2152	51.2584	76.5333	148.391	61.5316	NA	NA	NA	NA	NA
comp2247091_c1_seq1	160.886	247.301	443.165	9.31229	24.7687	102.154	185.7	290.575	NA	NA	NA	NA	NA
comp2247098_c0_seq1	1312.36	916.838	1467.17	27.6136	16.1646	942.439	667.843	510.184	ref|XP_009065267.1| hypothetical protein LOTGIDRAFT_229629 [Lottia gigantea] gb|ESO84141.1| hypothetical protein LOTGIDRAFT_229629 [Lottia gigantea]	3e-05	28	47	4
comp2247108_c0_seq2	4.21623	4.25359	4.2965	42.807	85.5707	2.93179	4.62024	4.3321	NA	NA	NA	NA	NA
comp2247142_c0_seq3	18.835	12.8232	15.9262	3.62887	4.54688	14.1416	15.3112	19.037	NA	NA	NA	NA	NA
comp2247179_c0_seq1	20.8412	24.6375	21.2661	3.62887	3.75838	11.3068	17.0626	13.9634	NA	NA	NA	NA	NA
comp2247192_c0_seq2	257.37	282.345	262.161	418.935	343.197	412.201	227.742	208.195	ref|XP_005093750.1| PREDICTED: cytoplasmic dynein 2 light intermediate chain 1-like isoform X2 [Aplysia californica]	2e-160	63	81	1
comp2247248_c0_seq1	42.1563	50.5435	54.1285	7.25773	9.68122	52.4976	43.0297	24.9619	NA	NA	NA	NA	NA
comp2247249_c0_seq1	331.042	395.535	362.001	176.837	217.892	459.613	452.355	409.775	ref|XP_005092180.1| PREDICTED: ATP-dependent RNA helicase SUPV3L1, mitochondrial-like [Aplysia californica] ref|XP_005092181.1| PREDICTED: ATP-dependent RNA helicase SUPV3L1, mitochondrial-like [Aplys	0	68	86	0
comp2247254_c0_seq1	7.55416	9.21305	5.55609	50.3526	70.7954	4.83133	7.64541	6.29565	NA	NA	NA	NA	NA
comp2247289_c0_seq5	36.9225	70.8483	81.6439	128.704	92.5735	83.456	48.5772	36.3342	NA	NA	NA	NA	NA
comp2247293_c0_seq1	37.2751	44.5414	45.1922	55.1697	59.6978	42.7314	35.5033	42.4207	NA	NA	NA	NA	NA
comp2247303_c0_seq1	88.173	133.018	145.924	48.0075	68.7145	85.3924	119.73	123.323	NA	NA	NA	NA	NA
comp2247304_c0_seq1	511.16	679.804	652.971	827.109	746.723	503.281	655.186	669.136	gb|ELU06401.1| hypothetical protein CAPTEDRAFT_223035 [Capitella teleta]	2e-100	49	61	8
comp2247307_c0_seq1	25.4684	17.881	17.4104	12.5865	14.8724	42.7765	11.7795	10.3735	gb|EYC03347.1| hypothetical protein Y032_0094g2706 [Ancylostoma ceylanicum]	2e-08	33	53	8
comp2247313_c0_seq1	36.1892	51.5885	79.0024	9.44054	14.2852	19.3399	101.232	92.2656	gb|ELT93449.1| hypothetical protein CAPTEDRAFT_220788 [Capitella teleta]	8e-10	31	49	24
comp2247345_c0_seq1	248.713	214.942	203.202	142.026	133.633	229.052	190.242	170.951	ref|XP_013404159.1| PREDICTED: sorcin-like [Lingula anatina]	5e-81	55	69	0
comp2247349_c0_seq1	58.3363	68.916	108.178	14.0339	21.2346	44.9102	62.524	72.4827	gb|EKC24533.1| hypothetical protein CGI_10019915 [Crassostrea gigas]	2e-39	42	65	1
comp2247380_c0_seq1	11.5399	311.354	147.624	95.0807	5.55373	31.1119	126.768	92.9415	NA	NA	NA	NA	NA
comp2247385_c0_seq1	12.594	8.10905	3.30977	41.7169	22.0804	2.84658	2.65463	4.52705	NA	NA	NA	NA	NA
comp2247387_c0_seq3	38.621	50.4855	49.7785	21.5782	8.04695	43.982	49.5667	39.3221	NA	NA	NA	NA	NA
comp2247421_c0_seq10	892.459	782.529	867.919	426.677	278.52	873.359	975.081	871.163	ref|XP_013393535.1| PREDICTED: L-gulonolactone oxidase-like isoform X1 [Lingula anatina]	2e-58	32	55	2
comp2247422_c0_seq1	15.627	8.90533	13.2666	41.6174	68.228	7.88674	16.5154	16.7499	ref|XP_013407048.1| PREDICTED: platelet-derived growth factor receptor beta-like [Lingula anatina]	3e-98	60	74	3
comp2247466_c0_seq1	34.1362	56.8096	60.334	22.2207	14.1173	29.8862	80.1081	56.1184	ref|XP_013421732.1| PREDICTED: ras-related and estrogen-regulated growth inhibitor-like [Lingula anatina] ref|XP_013421733.1| PREDICTED: ras-related and estrogen-regulated growth inhibitor-like [Lingu	3e-71	55	76	3
comp2247468_c0_seq1	21.0123	20.4882	32.7318	5.105	7.36227	14.8307	19.9025	18.8072	gb|ELU03323.1| hypothetical protein CAPTEDRAFT_140771, partial [Capitella teleta]	3e-19	31	57	3
comp2247471_c0_seq1	138.162	145.125	158.37	345.616	330.027	198.447	129.15	137.734	NA	NA	NA	NA	NA
comp2247474_c0_seq3	1260.27	3085.32	4055.48	336.407	474.984	1105.01	3195.94	2460.91	ref|XP_002603652.1| hypothetical protein BRAFLDRAFT_98594 [Branchiostoma floridae] gb|EEN59663.1| hypothetical protein BRAFLDRAFT_98594 [Branchiostoma floridae]	2e-90	29	47	8
comp2247483_c0_seq2	241.067	301.129	276.266	168.353	103.627	311.045	306.015	246.729	ref|XP_013399374.1| PREDICTED: regucalcin-like [Lingula anatina]	1e-112	58	70	4
comp2247498_c1_seq4	515.171	584.26	591.41	996.388	1108.99	621.397	641.3	560.078	ref|XP_006108243.1| PREDICTED: calmodulin-A-like [Myotis lucifugus]	1e-47	63	82	0
comp2247533_c0_seq1	28510.6	22490.2	20695.5	17797.2	11645.5	25086.4	26666.6	23634.9	gb|ABW23224.1| ribosomal protein rpl21 [Eurythoe complanata]	1e-73	76	86	0
comp2247536_c0_seq1	57.4711	51.261	52.6852	223.476	264.789	52.8446	56.8966	60.8301	NA	NA	NA	NA	NA
comp2247574_c0_seq2	43.8848	38.4637	33.0055	101.824	81.5361	31.4127	27.3976	38.0079	gb|ELT88326.1| hypothetical protein CAPTEDRAFT_218858 [Capitella teleta]	3e-07	31	43	29
comp2247618_c0_seq1	41.5503	17.2535	25.6217	97.4258	83.3454	24.2814	25.9124	28.6825	NA	NA	NA	NA	NA
comp2247661_c0_seq2	35.8507	36.5703	66.9137	2.44062	8.31205	23.9724	19.2656	51.789	NA	NA	NA	NA	NA
comp2247680_c0_seq1	21.7902	14.2239	20.0124	5.94124	1.70472	8.03346	18.4607	14.9213	ref|XP_013182842.1| PREDICTED: large neutral amino acids transporter small subunit 1 [Amyelois transitella]	4e-40	40	60	1
comp2247684_c0_seq1	64.583	56.6697	59.546	28.8359	33.2148	42.2205	48.1598	79.9407	ref|XP_002112311.1| hypothetical protein TRIADDRAFT_56202 [Trichoplax adhaerens] gb|EDV24421.1| hypothetical protein TRIADDRAFT_56202 [Trichoplax adhaerens]	5e-129	51	72	3
comp2247687_c0_seq1	14.0866	10.176	8.97651	48.459	43.335	8.68753	10.0338	9.91912	NA	NA	NA	NA	NA
comp2247737_c0_seq1	33.155	74.2419	67.6537	12.0748	33.2985	36.1471	71.7384	42.3193	NA	NA	NA	NA	NA
comp2247744_c0_seq2	551.334	194.277	153.841	45.8574	59.0466	529.375	118.37	227.793	NA	NA	NA	NA	NA
comp2247753_c0_seq1	18.3248	21.4545	27.1256	9.98624	6.2516	16.4458	26.141	39.9528	ref|XP_012934781.1| PREDICTED: uncharacterized protein LOC101856162 isoform X1 [Aplysia californica]	1e-14	32	53	9
comp2247754_c0_seq1	529.26	639.734	588.598	444.718	359.134	565.684	631.079	664.44	gb|ELT88434.1| hypothetical protein CAPTEDRAFT_172235 [Capitella teleta]	0	72	85	2
comp2247754_c1_seq1	1613.07	1451.87	1150.28	825.256	857.997	1695.57	1515.62	1573.32	ref|XP_012942968.1| PREDICTED: FACT complex subunit SSRP1-like [Aplysia californica]	5e-13	59	76	3
comp2247779_c0_seq5	114.244	82.6342	79.4496	254.952	198.737	85.2194	94.3133	90.1117	NA	NA	NA	NA	NA
comp2247821_c0_seq5	930.833	1228.09	1071.56	716.179	530.199	761.777	1330.12	1138.25	ref|XP_011433764.1| PREDICTED: uncharacterized protein LOC105332768 isoform X1 [Crassostrea gigas] ref|XP_011433766.1| PREDICTED: uncharacterized protein LOC105332768 isoform X1 [Crassostrea gigas]	4e-51	53	71	2
comp2247825_c0_seq1	150.215	209.637	212.001	58.2803	39.3353	112.908	201.492	190.338	ref|XP_011435954.1| PREDICTED: B-cell receptor-associated protein 31-like [Crassostrea gigas] ref|XP_011435955.1| PREDICTED: B-cell receptor-associated protein 31-like [Crassostrea gigas] gb|EKC26534.	6e-45	38	59	8
comp2247858_c0_seq1	1733.75	2078.62	1938.76	1527.42	927.97	2173.17	2223.71	1887.82	ref|XP_013776932.1| PREDICTED: mitochondrial import receptor subunit TOM20 homolog [Limulus polyphemus]	4e-41	66	87	5
comp2247866_c0_seq2	9.70892	6.80914	9.87883	18.3694	43.7041	7.63398	6.92745	13.0473	ref|XP_013400511.1| PREDICTED: LOW QUALITY PROTEIN: hemicentin-1-like, partial [Lingula anatina]	2e-77	47	65	0
comp2247873_c0_seq2	188.727	231.309	196.924	72.4752	95.255	291.163	281.826	216.634	NA	NA	NA	NA	NA
comp2247881_c0_seq1	226.027	276.987	220.327	62.8096	82.9697	252.459	232.485	203.018	ref|XP_013389988.1| PREDICTED: ribosomal RNA-processing protein 7 homolog A-like [Lingula anatina]	5e-87	52	72	0
comp2247887_c0_seq4	22.2179	16.277	15.967	3.21141	5.73479	21.3302	7.39942	5.45135	NA	NA	NA	NA	NA
comp2247912_c0_seq1	27.5781	30.5612	32.9114	3.9822	9.1712	35.1286	20.5972	19.0651	ref|XP_011449201.1| PREDICTED: uncharacterized protein LOC105343506 [Crassostrea gigas]	4e-06	43	71	2
comp2247930_c0_seq1	2639.69	2540.19	2571.33	1962.91	1834.64	3373.8	2590.11	2358.39	ref|XP_014662300.1| PREDICTED: uncharacterized protein LOC106805277 [Priapulus caudatus]	1e-58	45	59	3
comp2247948_c0_seq1	149.055	348.879	237.128	125.168	83.1404	214.961	198.802	151.902	ref|WP_037512918.1| sulfotransferase [Sphingobium yanoikuyae] gb|KFD25781.1| sulfotransferase [Sphingobium yanoikuyae]	1e-40	28	51	3
comp2247957_c0_seq2	15.9938	25.1107	42.2207	5.45834	11.5402	7.13833	29.8638	26.8922	gb|ELU14018.1| hypothetical protein CAPTEDRAFT_3202 [Capitella teleta]	2e-38	43	56	1
comp2247958_c0_seq1	607.373	1161.1	1153.46	634.406	526.595	849.553	1160.84	1243.7	gb|ELT98567.1| hypothetical protein CAPTEDRAFT_226348 [Capitella teleta]	0	69	81	2
comp2247991_c0_seq1	331.523	324.326	251.163	71.3825	139.429	344.177	370.356	288.286	NA	NA	NA	NA	NA
comp2247993_c0_seq2	72.8269	71.1227	90.5434	157.288	176.884	106.023	67.7233	57.3585	NA	NA	NA	NA	NA
comp2248027_c0_seq1	228.876	117.397	137.812	30.3448	89.8829	226.462	115.197	145.94	NA	NA	NA	NA	NA
comp2248034_c0_seq1	59.2421	88.5962	75.4011	4.88124	20.8859	57.7195	71.6984	82.5219	ref|XP_011549179.1| PREDICTED: uncharacterized protein LOC105381193 [Plutella xylostella]	6e-28	41	60	0
comp2248044_c0_seq1	316.913	250.566	178.12	72.7369	134.571	229.103	210.526	246.864	NA	NA	NA	NA	NA
comp2248047_c0_seq1	35.1145	7.60294	14.0592	1.6057	6.5101	7.21414	12.0517	15.9378	NA	NA	NA	NA	NA
comp2248055_c0_seq2	34.8884	9.44029	15.4762	37.0254	62.594	17.3567	10.4015	15.5737	NA	NA	NA	NA	NA
comp2248057_c0_seq1	98.2783	39.5094	55.1408	36.5752	40.0735	144.782	23.5558	25.4934	NA	NA	NA	NA	NA
comp2248059_c0_seq4	526.525	885.514	1344.86	64.3223	216.082	351.447	961.507	1086.08	NA	NA	NA	NA	NA
comp2248064_c0_seq2	66.3107	97.4094	104.742	138.891	168.966	41.8961	86.21	94.9739	gb|ELT97508.1| hypothetical protein CAPTEDRAFT_171008 [Capitella teleta]	4e-89	59	70	9
comp2248064_c2_seq1	39.1174	70.9701	76.7771	105.296	114.502	40.4854	69.1561	73.5597	gb|ELT97508.1| hypothetical protein CAPTEDRAFT_171008 [Capitella teleta]	4e-115	58	72	5
comp2248109_c0_seq1	24.449	37.0319	36.0488	9.37641	10.1779	12.3723	29.0387	41.7589	gb|ELU06808.1| hypothetical protein CAPTEDRAFT_82130, partial [Capitella teleta]	3e-06	28	49	0
comp2248120_c0_seq2	145.114	138.138	130.849	50.3186	56.4022	122.834	127.646	131.52	ref|XP_013396769.1| PREDICTED: glyoxylate/hydroxypyruvate reductase B-like [Lingula anatina]	4e-88	47	66	2
comp2248121_c0_seq5	1.49121	2.12325	1.3601	47.3676	52.0465	2.7024	2.05827	2.09855	NA	NA	NA	NA	NA
comp2248164_c0_seq1	192.809	186.211	154.396	621.369	737.839	173.986	204.98	153.433	NA	NA	NA	NA	NA
comp2248171_c0_seq8	173.955	285.706	367.152	190.067	165.555	140.809	343.165	386.595	ref|XP_011664879.1| PREDICTED: fibropellin-1-like [Strongylocentrotus purpuratus]	6e-44	33	49	6
comp2248177_c1_seq1	79.1743	51.7673	46.8465	10.4691	35.9863	53.4764	50.9243	51.3131	NA	NA	NA	NA	NA
comp2248191_c0_seq2	32.8827	65.6661	59.8788	8.31773	23.1072	36.4764	70.529	55.8461	NA	NA	NA	NA	NA
comp2248195_c0_seq2	27.4555	27.2442	19.3362	80.0876	97.2745	37.8532	31.074	20.1748	ref|XP_011443734.1| PREDICTED: uncharacterized protein LOC105339731 [Crassostrea gigas]	7e-14	48	66	1
comp2248226_c3_seq1	6052.38	6843.13	7282.32	21367.7	14109.7	6563.84	7324.99	7320.76	gb|ELU15616.1| hypothetical protein CAPTEDRAFT_148920 [Capitella teleta]	2e-157	78	89	0
comp2248245_c0_seq1	46.6093	11.2124	11.5907	91.4504	36.9664	151.083	9.55035	16.9168	ref|XP_013421984.1| PREDICTED: GTP-binding protein SAR1-like isoform X2 [Lingula anatina] ref|XP_013421985.1| PREDICTED: GTP-binding protein SAR1-like isoform X2 [Lingula anatina]	4e-38	55	73	0
comp2248271_c0_seq1	20.8123	23.3743	31.153	0	1.02683	8.56672	24.5662	32.226	NA	NA	NA	NA	NA
comp2248311_c0_seq1	43.5749	63.2443	61.298	11.5291	22.3659	61.6742	71.4118	48.53	NA	NA	NA	NA	NA
comp2248335_c1_seq1	19.197	13.661	13.0802	80.6019	78.6802	16.8542	19.9631	12.5277	ref|XP_013385421.1| PREDICTED: TPR repeat-containing protein DDB_G0287407-like isoform X2 [Lingula anatina]	3e-10	53	66	0
comp2248355_c0_seq3	218.161	186.735	147.603	347.194	330.379	387.274	247.787	182.579	NA	NA	NA	NA	NA
comp2248368_c0_seq1	83.7428	148.202	190.262	68.493	58.51	61.5629	101.842	134.481	gb|ELU10108.1| hypothetical protein CAPTEDRAFT_149082 [Capitella teleta]	0	71	84	0
comp2248374_c0_seq1	18.7979	17.7325	15.2046	41.62	54.8419	13.616	16.7904	9.5974	NA	NA	NA	NA	NA
comp2248394_c0_seq1	558.362	616.834	694.963	328.229	227.126	686.667	530.848	710.343	gb|ELU05751.1| hypothetical protein CAPTEDRAFT_156089 [Capitella teleta]	0	72	85	0
comp2248410_c0_seq1	148.907	155.665	147.601	69.3894	49.2115	163.386	139.292	126.486	gb|ELT99147.1| hypothetical protein CAPTEDRAFT_183158 [Capitella teleta]	2e-70	68	82	1
comp2248412_c0_seq1	20.5339	47.9104	32.998	1.18825	5.65774	35.8857	31.0653	13.4194	NA	NA	NA	NA	NA
comp2248426_c0_seq1	9.01818	11.2613	10.4479	24.1497	43.6238	6.34727	6.0938	9.87992	NA	NA	NA	NA	NA
comp2248429_c0_seq1	532.447	560.333	428.579	202.007	176.084	589.856	542.889	458.157	ref|XP_013407571.1| PREDICTED: neuroguidin-like [Lingula anatina]	1e-75	52	76	2
comp2248442_c1_seq2	35.2399	32.9799	44.5995	76.0112	115.892	24.5288	46.1941	30.4044	NA	NA	NA	NA	NA
comp2248445_c0_seq1	110.426	79.1958	68.9622	26.6858	31.8523	101.238	63.2306	77.0396	NA	NA	NA	NA	NA
comp2248454_c1_seq1	7.16187	2.52416	2.90114	0.417457	0.600649	2.37181	4.19476	0.793913	NA	NA	NA	NA	NA
comp2248460_c0_seq1	13.8082	16.764	18.5772	2.31237	4.54028	8.17919	11.513	14.1689	NA	NA	NA	NA	NA
comp2248466_c0_seq1	91.7157	280.353	222.135	151.335	91.7643	52.1614	275.74	230.983	ref|XP_005088489.1| PREDICTED: neuropeptide Y receptor type 1 [Mesocricetus auratus]	2e-07	24	47	8
comp2248476_c0_seq1	7.02246	13.5269	17.8324	2.79395	6.08392	8.61601	14.8221	9.44921	NA	NA	NA	NA	NA
comp2248506_c0_seq1	99.1542	126.943	107.46	40.331	34.7954	117.047	134.136	116.653	gb|KDR15893.1| Translin [Zootermopsis nevadensis]	5e-69	58	79	0
comp2248510_c0_seq1	107.454	118.43	132.775	29.6421	33.8291	82.5697	127.648	158.446	NA	NA	NA	NA	NA
comp2248527_c0_seq2	1350.84	2306.86	2350.17	7476.92	6437.03	1364.24	2081.9	1925.4	gb|ELU16307.1| hypothetical protein CAPTEDRAFT_221097 [Capitella teleta]	0	72	84	1
comp2248548_c0_seq1	60.5758	52.8148	67.9475	98.0709	63.1945	32.2014	80.9273	101.072	NA	NA	NA	NA	NA
comp2248557_c0_seq1	5.88498	10.1127	7.9523	160.746	132.607	9.38605	8.70489	12.2587	ref|XP_009065389.1| hypothetical protein LOTGIDRAFT_155606 [Lottia gigantea] gb|ESO84271.1| hypothetical protein LOTGIDRAFT_155606 [Lottia gigantea]	1e-06	50	70	0
comp2248569_c0_seq1	88.5048	89.7456	95.5617	384.172	278.131	80.8822	76.9845	67.9299	ref|XP_003217068.1| PREDICTED: retinol dehydrogenase 7-like [Anolis carolinensis]	3e-79	44	65	4
comp2248585_c0_seq2	252.7	179.523	192.196	23.7623	16.1444	216.695	135.803	136.928	ref|XP_009016114.1| hypothetical protein HELRODRAFT_77319 [Helobdella robusta] gb|ESO05481.1| hypothetical protein HELRODRAFT_77319 [Helobdella robusta]	1e-49	47	67	0
comp2248588_c0_seq1	16.6704	18.8682	19.6587	38.1496	53.4558	39.3313	18.565	17.4684	NA	NA	NA	NA	NA
comp2248635_c0_seq2	11.3395	7.49749	9.27118	58.3497	33.7516	11.3523	9.64301	13.914	gb|KND51145.1| hypothetical protein ABA06_02410 [Parcubacteria bacterium C7867-001]	3e-13	42	61	0
comp2248640_c0_seq1	9.10844	5.99192	5.65065	45.2149	43.631	11.2282	2.93546	7.22523	NA	NA	NA	NA	NA
comp2248643_c1_seq1	75.7655	102.704	109.687	831.273	995.76	153.14	112.259	101.225	ref|XP_004913210.1| PREDICTED: uncharacterized protein LOC101730969 [Xenopus tropicalis]	0	44	65	4
comp2248645_c0_seq3	199.734	298.134	270.801	464.852	391.674	140.461	288.827	299.284	ref|XP_009095884.1| PREDICTED: probable beta-D-xylosidase 2, partial [Serinus canaria]	2e-126	47	67	2
comp2248645_c1_seq1	278.364	303.286	258.696	695.2	500.492	212.026	339.029	339.73	gb|KOF71611.1| hypothetical protein OCBIM_22000835mg, partial [Octopus bimaculoides]	4e-77	45	67	1
comp2248657_c0_seq1	31.0914	54.3338	71.9215	146.016	162.074	26.3163	50.4521	51.6369	ref|XP_013420772.1| PREDICTED: protein FAM135A-like isoform X2 [Lingula anatina]	2e-95	57	72	4
comp2248694_c0_seq4	35.368	51.351	67.958	17.791	23.03	27.897	53.7148	51.0958	NA	NA	NA	NA	NA
comp2248712_c0_seq3	25.8102	37.4591	56.4119	63.7714	60.017	29.1101	40.1381	30.5572	ref|XP_790627.1| PREDICTED: uncharacterized protein LOC585718 [Strongylocentrotus purpuratus]	1e-34	42	61	4
comp2248716_c0_seq1	257.25	258.08	197.62	844.785	878.694	285.303	241.972	206.43	gb|AHI16243.1| gbrl [Platynereis dumerilii]	4e-76	100	100	0
comp2248717_c0_seq4	10.8825	26.2197	24.8132	3.14728	4.03007	9.05264	28.1847	30.9368	NA	NA	NA	NA	NA
comp2248738_c0_seq1	101.946	108.904	105.788	320.574	244.246	96.2086	94.7126	114.581	NA	NA	NA	NA	NA
comp2248746_c0_seq2	8.398	31.9989	34.1267	0.77079	4.03007	7.60981	22.5369	26.6676	NA	NA	NA	NA	NA
comp2248750_c1_seq2	1217.82	2064.22	1894.42	893.164	873.699	1344.35	1693.02	1628.11	ref|XP_013399782.1| PREDICTED: B-cell linker protein-like [Lingula anatina]	8e-20	41	67	5
comp2248760_c0_seq1	91.9478	82.452	110.051	22.3516	45.4595	47.7571	72.836	92.3707	NA	NA	NA	NA	NA
comp2248791_c0_seq4	688.952	805.431	760.527	1646.16	1401.07	708.872	887.58	828.425	ref|XP_009061626.1| hypothetical protein LOTGIDRAFT_219929 [Lottia gigantea] gb|ESO87732.1| hypothetical protein LOTGIDRAFT_219929 [Lottia gigantea]	1e-86	52	68	3
comp2248794_c0_seq1	68.6995	100.4	95.4705	181.664	195.316	62.7681	90.2253	83.528	NA	NA	NA	NA	NA
comp2248798_c0_seq2	14.9566	22.4427	17.2839	34.683	48.6745	18.886	11.5739	14.7056	NA	NA	NA	NA	NA
comp2248802_c1_seq2	83.4234	97.7309	118.046	255.326	297.055	109.336	82.5285	117.82	gb|ELU11457.1| hypothetical protein CAPTEDRAFT_193861 [Capitella teleta]	0	51	69	1
comp2248806_c0_seq1	27.7762	72.4124	54.8409	235.978	105.717	14.6398	55.371	59.8608	ref|XP_005992287.1| PREDICTED: frizzled-2 [Latimeria chalumnae]	4e-30	44	60	8
comp2248808_c0_seq2	38797	60941.2	80173.6	9891.63	11049.8	32197.9	70973.1	84681.6	dbj|BAB18897.1| troponin C [Perinereis vancaurica tetradentata] dbj|BAB18898.1| troponin C [Perinereis vancaurica tetradentata]	9e-79	90	96	0
comp2248818_c0_seq1	11.5604	9.04554	8.65781	43.863	289.461	10.6059	14.8133	15.4663	ref|XP_013062016.1| PREDICTED: CBL-interacting protein kinase 28-like [Biomphalaria glabrata]	9e-25	35	53	7
comp2248842_c0_seq4	49.0949	57.135	55.9091	13.0694	21.4664	54.3949	51.5237	39.5082	gb|ACQ58065.1| Probable thiopurine S-methyltransferase [Anoplopoma fimbria] gb|ACQ58452.1| Probable thiopurine S-methyltransferase [Anoplopoma fimbria]	2e-52	47	66	1
comp2248854_c0_seq2	40.6236	38.4525	33.7723	76.3305	70.8719	46.5577	34.1687	27.203	NA	NA	NA	NA	NA
comp2248854_c1_seq1	21.8414	20.7139	16.7518	38.5356	36.1977	30.9801	17.1524	17.573	NA	NA	NA	NA	NA
comp2248857_c0_seq2	4.517	20.5891	18.9527	2.02316	5.30202	5.13727	21.6336	7.12742	ref|XP_013383989.1| PREDICTED: toll-like receptor 13 [Lingula anatina]	7e-32	47	69	4
comp2248859_c2_seq1	60.4608	41.314	55.3004	8.798	6.68438	74.6592	44.2454	64.7404	gb|AEI70677.1| GST-sigma [Perinereis nuntia]	9e-39	52	72	1
comp2248879_c0_seq1	204.698	263.492	217.415	17.7596	71.9665	240.496	254.441	186.383	NA	NA	NA	NA	NA
comp2248885_c0_seq1	54.321	39.3752	44.4177	124.207	109.707	40.0333	60.3703	41.5165	NA	NA	NA	NA	NA
comp2248933_c1_seq1	62.0592	92.7095	67.8582	131.566	134.433	78.4494	77.7283	50.1649	NA	NA	NA	NA	NA
comp2248939_c0_seq3	27.0049	17.8943	25.3155	2.85808	113.427	8.50005	13.9911	20.4129	gb|EKC30966.1| hypothetical protein CGI_10019766 [Crassostrea gigas]	0.0001	22	44	15
comp2248955_c0_seq1	0.866579	6.69349	10.82	362.957	192.185	2.27109	7.90313	1.58783	NA	NA	NA	NA	NA
comp2249005_c0_seq2	22751.4	34905.8	45153.1	19088.8	16565.2	23459.5	37446.1	42778.4	ref|XP_013413192.1| PREDICTED: fructose-bisphosphate aldolase-like [Lingula anatina]	0	78	86	0
comp2249007_c0_seq1	15.9259	31.7016	37.7833	3.91807	8.20804	13.2453	27.0702	29.9744	gb|ELU09058.1| hypothetical protein CAPTEDRAFT_121651 [Capitella teleta]	7e-46	64	80	0
comp2249008_c0_seq1	9.11325	2.37413	3.45722	0	0.852361	4.28846	2.63438	2.22532	NA	NA	NA	NA	NA
comp2249011_c0_seq1	99.5874	92.1046	89.1362	55.3909	56.7888	90.7369	77.3462	101.654	ref|XP_013390595.1| PREDICTED: UPF0488 protein C8orf33 homolog [Lingula anatina]	2e-27	38	55	10
comp2249042_c0_seq1	77.5168	79.5587	88.8906	353.749	404.377	57.7245	76.3011	91.3758	ref|XP_002111326.1| hypothetical protein TRIADDRAFT_23698 [Trichoplax adhaerens] gb|EDV25293.1| hypothetical protein TRIADDRAFT_23698 [Trichoplax adhaerens]	1e-05	45	64	2
comp2249043_c0_seq1	36.3453	60.2742	54.157	91.94	153.771	46.223	73.1113	65.8393	gb|ELU16346.1| hypothetical protein CAPTEDRAFT_151823 [Capitella teleta]	7e-35	52	69	2
comp2249047_c0_seq1	86.0906	23.6942	7.58002	2.37649	1.54364	2.35173	6.32535	15.8315	ref|XP_010745587.1| PREDICTED: uncharacterized protein LOC104932122 [Larimichthys crocea] gb|KKF33461.1| DNA polymerase III polC-type [Larimichthys crocea]	1e-14	32	55	7
comp2249053_c0_seq1	32.0031	40.3317	47.9527	12.9412	9.92614	32.0128	26.9778	30.7574	NA	NA	NA	NA	NA
comp2249058_c0_seq2	1620.9	1418.7	1944.71	171.037	488.308	884.469	1390.83	1865.22	NA	NA	NA	NA	NA
comp2249059_c0_seq1	16.083	6.75192	4.70711	52.3365	22.3723	17.9856	8.40683	6.79385	gb|KKW92659.1| hypothetical protein YP76_06915 [Sphingobium chungbukense]	2e-27	61	71	5
comp2249062_c0_seq1	1726.34	1757.8	1943.63	388.577	559.117	1223.59	1428.28	1787.78	ref|XP_011425311.1| PREDICTED: perlucin-like [Crassostrea gigas]	2e-08	31	44	6
comp2249071_c0_seq1	11.8554	5.68201	6.44476	0.417457	0	8.17105	5.51769	4.8932	gb|AGS55443.1| hairy enhancer of split 9 [Platynereis dumerilii]	2e-151	100	100	0
comp2249077_c0_seq1	10.221	13.4369	11.4783	38.5683	40.51	6.87993	17.4563	9.41068	NA	NA	NA	NA	NA
comp2249082_c0_seq1	13.1512	13.3311	37.9173	46.5955	44.0973	14.0506	57.3737	16.6152	NA	NA	NA	NA	NA
comp2249090_c0_seq1	21.7867	47.5991	39.8793	11.6901	9.23486	25.0773	25.5737	30.0086	ref|XP_012937727.1| PREDICTED: indole-3-acetaldehyde oxidase-like [Aplysia californica]	2e-52	54	67	3
comp2249145_c0_seq2	29.418	21.6531	24.2492	15.7037	28.7516	50.7762	15.0217	8.98426	NA	NA	NA	NA	NA
comp2249164_c0_seq1	19.907	6.33044	8.08015	22.7363	53.993	11.6677	7.83072	5.9703	NA	NA	NA	NA	NA
comp2249175_c0_seq1	15.0009	13.213	30.3342	2.02316	8.74502	7.56353	10.5405	19.7187	NA	NA	NA	NA	NA
comp2249177_c0_seq1	259.964	278.522	242.68	802.77	951.03	412.06	319.985	198.627	ref|XP_004396739.1| PREDICTED: heat shock protein beta-8 [Odobenus rosmarus divergens]	8e-05	32	45	8
comp2249185_c0_seq2	8.15818	8.43552	8.67345	26.1414	26.1743	12.5546	10.6967	10.5181	NA	NA	NA	NA	NA
comp2249204_c0_seq1	210.38	211.335	228.088	32.1769	53.2047	186.499	171.347	233.999	NA	NA	NA	NA	NA
comp2249224_c0_seq3	15.4691	17.331	16.4331	1.66983	1.2013	11.5555	11.0007	16.3112	ref|XP_014186906.1| PREDICTED: zinc finger protein 239-like, partial [Haplochromis burtoni]	2e-18	32	48	14
comp2249227_c0_seq1	1142.26	1165.65	1067.5	1736.46	1524.64	1208.51	1028.71	1158.15	gb|ELU18703.1| hypothetical protein CAPTEDRAFT_166040 [Capitella teleta]	2e-86	69	87	0
comp2249230_c0_seq1	5.19326	2.6576	3.31572	12.8783	44.2417	2.11905	1.21297	0.460344	NA	NA	NA	NA	NA
comp2249251_c0_seq1	107.836	161.085	145.448	66.568	40.4026	89.2848	143.608	138.6	NA	NA	NA	NA	NA
comp2249258_c0_seq1	134.983	319.683	390.058	92.3769	55.5066	105.296	367.129	325.655	ref|XP_013392442.1| PREDICTED: zinc finger CCHC domain-containing protein 24-like isoform X1 [Lingula anatina]	2e-85	60	69	7
comp2249262_c0_seq3	2852.4	2208.75	2368.33	1728.74	2686.64	720.026	2365.53	4721.97	NA	NA	NA	NA	NA
comp2249280_c0_seq2	21.0153	36.8218	31.0658	41.9394	60.862	41.7935	38.1809	36.7435	NA	NA	NA	NA	NA
comp2249298_c1_seq4	144.092	235.979	257.408	19.911	47.3994	115.864	198.71	146.253	ref|XP_013103627.1| PREDICTED: uncharacterized protein LOC106084471 [Stomoxys calcitrans]	8e-11	23	45	8
comp2249314_c0_seq1	34.1229	26.4146	22.1426	26.78	18.3286	58.6679	19.037	22.1126	gb|ELU06808.1| hypothetical protein CAPTEDRAFT_82130, partial [Capitella teleta]	4e-07	29	46	0
comp2249318_c0_seq3	82.1487	157.988	121.124	28.6409	16.5973	83.8689	79.2884	108.186	ref|XP_002605287.1| hypothetical protein BRAFLDRAFT_95868 [Branchiostoma floridae] gb|EEN61297.1| hypothetical protein BRAFLDRAFT_95868 [Branchiostoma floridae]	4e-05	35	52	17
comp2249336_c0_seq1	467.657	375.277	378.269	2056.9	2058.38	626.774	351.552	409.028	NA	NA	NA	NA	NA
comp2249343_c0_seq1	104.119	190.378	108.537	401.9	311.459	98.0881	197.608	176.637	ref|XP_008193333.1| PREDICTED: cell wall protein IFF6-like [Tribolium castaneum]	1e-13	46	93	0
comp2249361_c0_seq2	151.018	69.4175	60.7701	14.1948	36.5938	134.006	88.7057	77.2359	NA	NA	NA	NA	NA
comp2249367_c0_seq1	26.1585	10.0899	10.7256	71.864	37.1739	11.4543	10.8357	15.9576	NA	NA	NA	NA	NA
comp2249378_c0_seq1	74.3773	93.7198	93.9293	318.341	176.75	100.852	123.604	136.006	ref|XP_011417045.1| PREDICTED: ganglioside GM2 activator-like [Crassostrea gigas] gb|EKC34170.1| Ganglioside GM2 activator [Crassostrea gigas]	7e-23	29	59	7
comp2249384_c0_seq1	37.9384	93.084	131.475	22.3176	55.4258	19.9965	123.505	147.382	NA	NA	NA	NA	NA
comp2249390_c0_seq2	285.883	204.93	273.212	126.743	100.801	249.332	332.235	342.556	ref|XP_012556928.1| PREDICTED: uncharacterized protein LOC105844637 [Hydra vulgaris]	7e-46	31	53	4
comp2249392_c0_seq1	27.0571	20.4802	20.3347	76.9062	65.3582	37.3044	21.2399	23.1979	NA	NA	NA	NA	NA
comp2249399_c0_seq6	37.9882	79.882	97.685	25.9137	35.1002	44.9918	79.7285	86.1577	dbj|GAP83599.1| putative nacht and ankyrin domain protein [Rosellinia necatrix]	1e-53	34	56	2
comp2249401_c0_seq2	23.0596	59.4204	46.9342	19.6846	18.2312	17.9853	50.7681	56.4052	NA	NA	NA	NA	NA
comp2249405_c0_seq1	45.9075	54.6211	51.0654	86.7721	112.705	33.1188	62.9061	63.8566	NA	NA	NA	NA	NA
comp2249408_c2_seq4	17.4857	20.0752	20.1026	2.37649	6.34223	16.134	15.8063	10.4506	gb|AGI05193.1| toll-like receptor Q precursor [Mytilus galloprovincialis]	4e-15	31	44	10
comp2249416_c0_seq2	11.8743	10.545	10.7494	46.9501	29.3788	9.21111	5.36141	11.1674	NA	NA	NA	NA	NA
comp2249497_c0_seq2	1188.6	1884.35	1808.04	3889.79	5058.73	1593.87	1619.7	1825.8	gb|ELT93973.1| hypothetical protein CAPTEDRAFT_160698 [Capitella teleta]	0	61	77	4
comp2249499_c0_seq1	39.0562	39.1458	46.0369	12.5237	13.433	43.6996	41.5015	28.5037	ref|XP_013775144.1| PREDICTED: solute carrier organic anion transporter family member 4A1-like [Limulus polyphemus]	6e-27	48	69	1
comp2249503_c0_seq2	7.56384	15.3596	19.7491	3.21141	5.74158	11.7635	28.5901	8.35204	NA	NA	NA	NA	NA
comp2249511_c0_seq1	12.3294	15.0964	18.6623	68.493	56.3081	16.1832	12.1296	13.8495	NA	NA	NA	NA	NA
comp2249528_c0_seq4	16.4093	13.1663	14.6152	28.3543	46.1304	11.5633	11.7968	12.5402	ref|XP_011425937.1| PREDICTED: midasin-like isoform X2 [Crassostrea gigas]	4e-05	44	62	4
comp2249566_c0_seq1	25.8512	27.0708	23.5129	4.81711	8.05374	25.3157	28.5499	29.3454	NA	NA	NA	NA	NA
comp2249569_c0_seq1	50.1036	81.6588	31.7082	18.4322	20.8288	36.6701	86.9601	25.5293	NA	NA	NA	NA	NA
comp2249579_c0_seq2	42.5329	51.7795	49.2219	5.00949	21.4093	48.5675	45.5109	33.9248	NA	NA	NA	NA	NA
comp2249601_c0_seq3	16.4128	16.5821	19.9201	28.2915	37.1341	15.6908	14.46	13.9413	ref|XP_011444955.1| PREDICTED: leucine-rich repeat-containing protein 69-like isoform X2 [Crassostrea gigas] gb|EKC41124.1| Leucine-rich repeat-containing protein 69 [Crassostrea gigas]	1e-67	74	88	0
comp2249602_c0_seq3	26.8041	38.8166	71.8306	335.603	178.392	29.0682	45.4503	35.4941	NA	NA	NA	NA	NA
comp2249605_c0_seq1	3.2695	2.26283	0.473642	1035.37	67.4032	7.56087	0.96403	1.43141	NA	NA	NA	NA	NA
comp2249630_c0_seq4	740.53	862.035	742.043	1792.37	1326.95	822.313	725.713	592.874	gb|ELT92570.1| hypothetical protein CAPTEDRAFT_219378 [Capitella teleta]	7e-39	44	66	0
comp2249660_c0_seq1	27.0058	27.6591	20.4814	3.91807	4.62412	32.3914	20.7247	12.4128	NA	NA	NA	NA	NA
comp2249682_c1_seq1	2.79041	2.54785	0.947284	2.02316	1.2013	0	3.06567	3.32317	NA	NA	NA	NA	NA
comp2249683_c0_seq3	935.315	1051.17	1221.46	431.246	293.397	906.009	977.472	587.884	NA	NA	NA	NA	NA
comp2249693_c0_seq1	41.4635	129.235	118.175	16.2154	22.8926	17.796	65.7898	47.7443	NA	NA	NA	NA	NA
comp2249749_c0_seq1	37.439	69.9167	75.4423	5.94124	9.15762	27.776	55.1594	48.4157	NA	NA	NA	NA	NA
comp2249778_c0_seq2	23.3539	49.8513	49.2469	116.733	103.207	41.7215	29.8408	36.4764	ref|XP_009029604.1| hypothetical protein HELRODRAFT_89686 [Helobdella robusta] gb|ESN92252.1| hypothetical protein HELRODRAFT_89686 [Helobdella robusta]	3e-05	96	100	0
comp2249790_c0_seq1	23.0342	24.1221	27.01	5.23457	10.1074	14.087	25.2377	26.2949	NA	NA	NA	NA	NA
comp2249798_c1_seq1	60.4173	56.7496	49.2701	310.299	335.693	81.9195	63.4886	44.9022	ref|XP_013400175.1| PREDICTED: U3 small nucleolar ribonucleoprotein protein IMP3-like [Lingula anatina]	1e-53	82	94	0
comp2249854_c0_seq1	180.123	407.4	434.365	20.5535	32.4764	94.9088	309.024	459.851	NA	NA	NA	NA	NA
comp2249858_c0_seq1	161.568	160.911	153.793	118.487	97.6642	205.114	161.854	117.558	emb|CAJ38797.1| Nk1 protein [Platynereis dumerilii]	2e-30	59	68	15
comp2249862_c0_seq2	50.0166	132.119	87.7603	65.1153	20.7114	71.476	86.937	78.8576	ref|XP_002590198.1| hypothetical protein BRAFLDRAFT_128286 [Branchiostoma floridae] gb|EEN46209.1| hypothetical protein BRAFLDRAFT_128286 [Branchiostoma floridae]	2e-55	49	62	3
comp2249871_c0_seq1	12.1448	20.1888	38.7664	1.18825	2.98326	28.058	13.4208	22.41	NA	NA	NA	NA	NA
comp2249886_c0_seq1	108.63	52.1043	50.711	27.7144	24.7747	85.53	84.381	81.7998	NA	NA	NA	NA	NA
comp2249907_c0_seq1	15.0877	14.6116	24.7804	3.62887	2.99665	6.96058	13.2471	15.5631	NA	NA	NA	NA	NA
comp2249909_c0_seq1	20.5106	12.8856	10.9299	51.7633	69.6	31.0228	12.6363	17.4878	NA	NA	NA	NA	NA
comp2249916_c0_seq1	68.7447	79.917	98.7331	44.4401	50.8586	83.9152	97.4368	61.4364	NA	NA	NA	NA	NA
comp2249931_c0_seq7	2935.89	3688.14	3946.91	2620.84	2281.58	3175.9	3652.12	4005.27	ref|XP_013419617.1| PREDICTED: transcription factor 12-like isoform X13 [Lingula anatina]	3e-49	50	62	14
comp2249950_c0_seq1	13.0183	15.6782	15.4173	131.856	186.305	8.8691	26.9892	22.7988	NA	NA	NA	NA	NA
comp2249951_c0_seq1	137.863	82.4931	73.0492	239.298	222.008	117.298	121.969	92.8414	NA	NA	NA	NA	NA
comp2249966_c0_seq3	14.2215	15.8983	11.3919	2.79395	1.02683	15.112	7.52963	12.8406	NA	NA	NA	NA	NA
comp2249971_c0_seq2	9.13654	15.0866	16.0953	59.4071	66.7175	28.7458	24.7774	27.0555	NA	NA	NA	NA	NA
comp2249979_c0_seq1	85.7245	71.3891	57.7213	20.3258	36.2245	91.9462	59.534	61.552	ref|XP_009062793.1| hypothetical protein LOTGIDRAFT_195007 [Lottia gigantea] gb|ESO86560.1| hypothetical protein LOTGIDRAFT_195007 [Lottia gigantea]	1e-89	64	82	0
comp2249984_c0_seq1	28.9971	24.6355	27.9883	80.0234	79.0099	26.7089	28.8389	35.0243	gb|ELT94421.1| hypothetical protein CAPTEDRAFT_218185 [Capitella teleta]	1e-13	35	54	11
comp2250006_c0_seq1	30.4371	24.6675	30.9278	57.9938	91.9327	28.9659	30.0869	27.1665	NA	NA	NA	NA	NA
comp2250017_c0_seq1	195.072	169.971	163.936	70.3198	91.6305	218.058	152.035	161.175	ref|XP_014771894.1| PREDICTED: CDGSH iron-sulfur domain-containing protein 3, mitochondrial-like [Octopus bimaculoides] gb|KOF89275.1| hypothetical protein OCBIM_22013324mg [Octopus bimaculoides]	8e-39	57	76	2
comp2250032_c0_seq1	21.7141	22.5973	20.531	16.7925	8.22142	28.3408	25.2233	34.8376	gb|AHB62387.1| NGEW neuropeptide precursor [Platynereis dumerilii]	4e-39	99	99	0
comp2250036_c0_seq1	843.197	901.325	1002.33	222.881	180.973	575.332	967.044	667.632	ref|XP_014307183.1| PREDICTED: transcription factor ETV6 isoform X6 [Myotis lucifugus]	9e-39	31	44	23
comp2250049_c0_seq1	17.7237	7.36407	12.2984	0	4.02348	6.6923	7.15614	13.3292	NA	NA	NA	NA	NA
comp2250056_c0_seq1	662.793	581.008	571.315	339.905	168.59	803.48	643.607	591.025	ref|XP_009047839.1| hypothetical protein LOTGIDRAFT_186016 [Lottia gigantea] gb|ESP01205.1| hypothetical protein LOTGIDRAFT_186016 [Lottia gigantea]	0	69	83	0
comp2250057_c0_seq1	46.4187	33.4989	52.651	9.69835	12.9362	19.3693	38.4299	41.0723	NA	NA	NA	NA	NA
comp2250061_c0_seq1	39.4023	24.0325	13.6278	4.39966	4.44966	62.3518	9.09002	9.36097	gb|ELU10130.1| hypothetical protein CAPTEDRAFT_187295 [Capitella teleta]	1e-65	43	57	11
comp2250064_c0_seq1	12.2272	7.68934	7.68892	2.37649	3.5973	4.30243	7.71781	9.01918	ref|XP_009058011.1| hypothetical protein LOTGIDRAFT_153749 [Lottia gigantea] gb|ESO91313.1| hypothetical protein LOTGIDRAFT_153749 [Lottia gigantea]	1e-30	49	69	7
comp2250065_c0_seq2	49.6267	67.8731	84.0129	24.7255	45.9833	38.1448	83.0057	88.4761	NA	NA	NA	NA	NA
comp2250079_c0_seq2	681.725	474.854	332.319	2687.06	3425.59	670.131	564.954	472.653	NA	NA	NA	NA	NA
comp2250084_c1_seq2	3224.57	2225.04	2041.75	497.584	1013.71	1557.06	1638.27	2575.67	NA	NA	NA	NA	NA
comp2250093_c0_seq1	146.97	152.209	132.226	65.5067	56.9666	146.933	142.6	143.275	ref|XP_013401455.1| PREDICTED: exosome complex exonuclease RRP42-like [Lingula anatina]	2e-133	60	82	0
comp2250112_c0_seq1	74.9085	249.508	206.553	46.2369	17.4229	103.247	192.115	196.363	NA	NA	NA	NA	NA
comp2250116_c0_seq2	3.40714	1.1471	11.227	0	0	1.93673	1.88173	4.51815	NA	NA	NA	NA	NA
comp2250155_c0_seq1	87.3283	115.054	142.594	44.6037	76.1578	74.907	102.184	101.938	NA	NA	NA	NA	NA
comp2250163_c0_seq2	118.08	122.48	146.642	34.5822	40.9767	139.823	119.053	129.608	ref|XP_013385782.1| PREDICTED: dehydrogenase/reductase SDR family member 11-like isoform X2 [Lingula anatina]	3e-91	56	75	1
comp2250174_c0_seq1	111.27	115.537	76.0025	1152.87	1076.11	159.472	129.009	125.523	ref|XP_002427791.1| conserved hypothetical protein [Pediculus humanus corporis] gb|EEB15053.1| conserved hypothetical protein [Pediculus humanus corporis]	4e-33	27	50	3
comp2250192_c0_seq1	84.149	80.5379	83.9175	43.4443	27.3389	97.2993	99.4432	77.1101	ref|XP_013384546.1| PREDICTED: uncharacterized protein LOC106154661 isoform X2 [Lingula anatina]	4e-25	40	56	3
comp2250200_c0_seq7	121.013	217.676	181.195	64.0266	54.4398	127.608	129.664	143.258	ref|XP_013393617.1| PREDICTED: sushi, von Willebrand factor type A, EGF and pentraxin domain-containing protein 1-like [Lingula anatina] ref|XP_013393692.1| PREDICTED: sushi, von Willebrand factor typ	3e-05	32	52	10
comp2250201_c0_seq1	607.317	959.413	977.808	360.016	270.883	668.724	929.287	1086.35	gb|ELU11834.1| hypothetical protein CAPTEDRAFT_188642 [Capitella teleta]	1e-101	51	69	7
comp2250204_c0_seq1	61.151	24.9134	37.1813	4.04632	26.9062	19.1785	34.3743	42.6071	NA	NA	NA	NA	NA
comp2250225_c0_seq2	263.044	238.414	179.973	10834.3	25749.3	190.732	143.072	183.734	NA	NA	NA	NA	NA
comp2250245_c0_seq1	148.078	177.453	165.281	75.3333	70.53	181.542	150.379	130.726	ref|XP_013786993.1| PREDICTED: protein CutA homolog isoform X2 [Limulus polyphemus]	4e-53	56	77	5
comp2250259_c0_seq1	43.6412	37.1078	51.429	9.47327	12.7349	36.2823	23.3388	27.669	NA	NA	NA	NA	NA
comp2250259_c1_seq3	108.445	139.525	152.211	33.3324	49.8894	117.034	89.629	116.002	ref|XP_013417111.1| PREDICTED: grainyhead-like protein 1 homolog isoform X2 [Lingula anatina]	5e-103	50	66	8
comp2250260_c0_seq1	1176.54	1363.19	1158.57	874.84	534.098	1307.23	1252.36	1253.52	gb|KPP58652.1| RNA-binding protein with serine-rich domain 1-like, partial [Scleropages formosus]	3e-33	71	90	0
comp2250278_c0_seq1	723.207	731.051	707.328	214.223	318.769	597.547	797.018	671.809	NA	NA	NA	NA	NA
comp2250283_c0_seq1	2.23153	0.352951	0.332145	122.987	142.004	0.437899	0	1.22462	sp|P02219.1|GLB1_TYLHE RecName: Full=Extracellular globin-1; AltName: Full=Erythrocruorin; AltName: Full=Extracellular globin I prf||0812179A hemoglobin	4e-27	43	59	2
comp2250341_c0_seq1	228.689	188.39	224.378	101.596	73.2949	232.159	185.526	212.865	NA	NA	NA	NA	NA
comp2250352_c0_seq2	77.8312	93.0417	164.917	9.5701	13.0336	100.338	101.816	93.0448	NA	NA	NA	NA	NA
comp2250374_c0_seq1	10.7403	17.6532	21.5239	26.3325	85.1105	15.5237	16.9556	16.1571	NA	NA	NA	NA	NA
comp2250384_c0_seq1	16.4312	11.0762	10.0532	28.2588	55.1735	18.9025	11.7852	16.7999	NA	NA	NA	NA	NA
comp2250385_c0_seq2	51.2042	38.7542	30.8103	24.5959	23.9666	53.0508	37.191	38.495	ref|XP_013395678.1| PREDICTED: mediator of RNA polymerase II transcription subunit 22-like [Lingula anatina] ref|XP_013419117.1| PREDICTED: mediator of RNA polymerase II transcription subunit 22-like	8e-55	64	81	1
comp2250410_c0_seq1	44.2722	21.5419	21.6322	10.2755	11.1342	19.3759	13.1169	23.7709	ref|XP_011953844.1| PREDICTED: aggrecan core protein isoform X1 [Ovis aries]	0.0001	32	47	10
comp2250421_c0_seq3	297.798	439.352	382.473	245.016	213.774	315.898	426.501	353.905	NA	NA	NA	NA	NA
comp2250448_c0_seq3	29.5566	23.7247	19.23	8.798	6.69117	23.8321	29.2274	16.4284	NA	NA	NA	NA	NA
comp2250452_c0_seq1	184.117	153.176	137.529	85.0316	79.9527	102.458	135.612	169.775	ref|XP_014776810.1| PREDICTED: CDK-activating kinase assembly factor MAT1-like [Octopus bimaculoides] gb|KOF82293.1| hypothetical protein OCBIM_22025470mg [Octopus bimaculoides]	3e-80	49	69	4
comp2250463_c0_seq1	51.471	78.0951	40.8467	241.698	135.012	82.7105	70.9341	65.9947	NA	NA	NA	NA	NA
comp2250470_c0_seq1	23359.6	23183.4	19779.6	12547	7041.08	25849.7	24717.4	20054.5	gb|ADC80504.1| peptidyl prolyl cis-trans isomerase A (I) [Conus novaehollandiae]	1e-80	82	89	0
comp2250474_c0_seq1	310.988	245.246	269.931	485.263	430.23	391.172	207.588	207.803	ref|XP_013383002.1| PREDICTED: uncharacterized protein C15orf26 homolog [Lingula anatina]	1e-78	50	64	7
comp2250539_c0_seq1	55.8562	88.0845	109.081	32.8194	57.6342	50.9518	98.2276	122.656	NA	NA	NA	NA	NA
comp2250550_c1_seq1	886.039	2542.03	2450.62	601.31	231.479	561.093	2442.64	2623.01	ref|XP_001626280.1| predicted protein [Nematostella vectensis] gb|EDO34180.1| predicted protein [Nematostella vectensis]	3e-39	42	58	4
comp2250551_c0_seq3	203.615	178.829	161.671	779.03	551.152	193.443	283.707	205.951	NA	NA	NA	NA	NA
comp2250584_c1_seq1	39.6084	31.9462	29.975	3.21141	13.2013	50.0113	31.3055	31.1933	NA	NA	NA	NA	NA
comp2250597_c0_seq1	10.4591	22.3566	21.5806	1.54158	0.42618	12.9454	20.6464	23.3995	NA	NA	NA	NA	NA
comp2250601_c0_seq2	11.1011	24.8543	21.6905	2.79395	8.65439	11.5534	14.9145	14.4238	NA	NA	NA	NA	NA
comp2250607_c0_seq5	9.61083	19.5385	18.2885	3.9822	4.1141	13.405	16.2927	18.8619	gb|KOM24888.1| hypothetical protein LR48_Vigan10s001700 [Vigna angularis]	2e-05	37	49	14
comp2250610_c0_seq2	178.056	171.805	267.36	5.23457	13.8858	172.208	176.969	284.203	ref|XP_013396514.1| PREDICTED: sushi, von Willebrand factor type A, EGF and pentraxin domain-containing protein 1-like [Lingula anatina]	9e-38	37	54	5
comp2250618_c0_seq1	18.7867	22.0574	28.1673	13.0681	7.09737	19.5213	31.9945	23.6224	NA	NA	NA	NA	NA
comp2250621_c2_seq1	49.0057	80.2739	113.162	14.2904	32.6711	32.4745	89.8435	81.6583	ref|XP_004994185.1| hypothetical protein PTSG_04866 [Salpingoeca rosetta] gb|EGD73154.1| hypothetical protein PTSG_04866 [Salpingoeca rosetta]	7e-18	48	68	2
comp2250628_c0_seq1	58.7703	45.3314	40.7202	20.5195	26.0536	53.2246	36.256	50.1007	ref|XP_014381193.1| PREDICTED: zinc finger protein 398 isoform X2 [Alligator sinensis]	2e-09	46	68	4
comp2250635_c0_seq1	181.552	196.356	210.803	95.9496	97.2547	259.635	189.787	163.193	ref|XP_013387690.1| PREDICTED: NEDD8 ultimate buster 1-like [Lingula anatina]	0	53	72	2
comp2250656_c0_seq1	791.551	1444.38	1454.95	1756.3	1756.12	747.321	1216.89	1231.8	gb|KDR08105.1| E3 ubiquitin-protein ligase Su(dx) [Zootermopsis nevadensis]	0	61	74	3
comp2250674_c0_seq3	156.348	102.462	113.358	33.8768	28.8488	151.845	105.074	120.107	gb|ELU16601.1| hypothetical protein CAPTEDRAFT_170083 [Capitella teleta]	6e-111	60	75	0
comp2250708_c0_seq1	25.7736	52.3522	54.9826	3.08316	3.15773	33.2908	34.8431	39.6096	NA	NA	NA	NA	NA
comp2250730_c0_seq1	94.1939	135.443	132.284	45.1181	57.0638	108.46	125.622	111.231	ref|XP_009065096.1| hypothetical protein LOTGIDRAFT_229530 [Lottia gigantea] gb|ESO83967.1| hypothetical protein LOTGIDRAFT_229530 [Lottia gigantea]	3e-71	33	54	4
comp2250754_c0_seq2	214.616	265.239	265.823	123.499	119.962	261.723	272.526	257.664	gb|ELU04073.1| hypothetical protein CAPTEDRAFT_225601 [Capitella teleta]	1e-47	36	50	5
comp2250762_c0_seq1	474.371	500.032	328.755	7.12948	11.8187	597.612	212.34	290.731	NA	NA	NA	NA	NA
comp2250764_c0_seq3	384.945	233.934	245.914	219.872	318.642	405.614	224.525	159.067	NA	NA	NA	NA	NA
comp2250777_c0_seq2	15.4652	26.9699	32.8781	9.56879	11.2953	17.5486	24.65	23.9158	ref|XP_013403229.1| PREDICTED: Na(+)/H(+) exchanger protein 7-like, partial [Lingula anatina]	4e-16	42	60	16
comp2250783_c0_seq1	44.0217	65.1751	61.9803	7.48282	13.1611	64.1685	41.6371	55.1375	NA	NA	NA	NA	NA
comp2250785_c0_seq4	86.147	356.068	288.766	32.8181	32.013	56.5811	285.53	353.528	NA	NA	NA	NA	NA
comp2250795_c0_seq1	52.6383	70.3696	70.7512	16.0557	32.4463	51.6165	91.9861	48.5125	NA	NA	NA	NA	NA
comp2250796_c0_seq1	41.211	62.7747	64.639	24.2452	32.2649	67.6362	48.9413	48.0166	ref|WP_048593298.1| hypothetical protein [Brachyspira suanatina] emb|CRF31413.1| ankyrin [Brachyspira suanatina]	4e-20	36	50	20
comp2250800_c0_seq1	49.7803	40.5616	43.8094	15.862	11.6375	60.072	42.9752	35.3697	ref|XP_013384554.1| PREDICTED: ubiquitin-related modifier 1-like [Lingula anatina]	1e-44	78	88	2
comp2250815_c0_seq1	7.9324	40.0811	34.8126	2.44062	6.33563	10.923	24.1957	8.96813	NA	NA	NA	NA	NA
comp2250818_c0_seq2	59.8848	116.342	132.334	31.8196	15.7518	56.6281	107.54	94.7592	ref|XP_014775194.1| PREDICTED: integrin beta-3-like isoform X1 [Octopus bimaculoides] gb|KOF84539.1| hypothetical protein OCBIM_22021913mg [Octopus bimaculoides]	2e-27	44	56	11
comp2250822_c0_seq1	16.8766	10.7672	11.7317	1.25237	4.10732	11.9094	9.03205	15.6108	NA	NA	NA	NA	NA
comp2250823_c0_seq3	24.5309	26.8743	34.731	5.0422	3.84901	13.5534	39.006	37.7311	NA	NA	NA	NA	NA
comp2250833_c0_seq5	374.717	446.3	515.817	236.574	252.637	415.028	457.971	529.42	gb|ELU13920.1| hypothetical protein CAPTEDRAFT_165375 [Capitella teleta]	0	55	68	12
comp2250837_c0_seq1	57.2765	91.5216	65.2313	20.1976	19.0838	55.308	93.0368	63.8145	NA	NA	NA	NA	NA
comp2250842_c0_seq2	25.443	13.9263	18.0332	165.411	267.929	33.6512	22.1722	15.3299	NA	NA	NA	NA	NA
comp2250851_c0_seq2	73.9944	154.582	108.845	34.6135	31.5029	86.5537	162.863	129.737	gb|ELT95408.1| hypothetical protein CAPTEDRAFT_226257 [Capitella teleta]	7e-26	43	65	3
comp2250866_c0_seq1	137.865	282.144	200.241	62.3293	52.7919	183.226	118.998	109.885	NA	NA	NA	NA	NA
comp2250886_c0_seq1	26.8833	20.9131	13.2611	79.9934	77.4154	31.5874	33.691	17.8681	NA	NA	NA	NA	NA
comp2250906_c0_seq2	22498.4	19708.2	19053.6	16276.4	9649.98	22001.4	20070.1	19835.2	gb|ABZ04235.1| ribosomal protein rpl23a [Lineus viridis]	2e-65	77	86	0
comp2250937_c0_seq4	4.02386	9.9611	7.96024	14.0326	19.2648	9.80104	11.9965	6.13494	NA	NA	NA	NA	NA
comp2250960_c0_seq4	4.18735	8.04293	3.91323	50.2898	29.255	7.05976	7.83072	5.30317	NA	NA	NA	NA	NA
comp2250968_c0_seq2	15.8823	38.626	27.0368	29.0898	5.47649	12.8648	18.2756	9.08668	NA	NA	NA	NA	NA
comp2250981_c0_seq1	184.264	160.34	162.053	406.039	471.428	141.346	178.923	190.208	ref|XP_011671501.1| PREDICTED: uncharacterized protein LOC592490 isoform X4 [Strongylocentrotus purpuratus] ref|XP_011671502.1| PREDICTED: uncharacterized protein LOC592490 isoform X5 [Strongylocentro	7e-09	29	43	17
comp2250982_c0_seq1	243.864	289.824	283.018	154.252	87.1207	264.393	234.187	255.457	ref|XP_013405237.1| PREDICTED: S-formylglutathione hydrolase-like [Lingula anatina]	1e-160	79	92	1
comp2250994_c0_seq1	24.3631	9.15743	14.2477	82.2756	87.1979	15.7674	13.0126	11.8991	NA	NA	NA	NA	NA
comp2251003_c0_seq1	3.74816	6.28306	8.28047	22.4484	26.9562	4.50106	5.01399	8.5292	ref|XP_012860404.1| PREDICTED: low-density lipoprotein receptor-related protein 2 [Echinops telfairi]	5e-49	41	57	4
comp2251015_c0_seq1	20.1364	20.1088	22.5072	2.50474	2.30537	20.9694	15.8092	13.5403	NA	NA	NA	NA	NA
comp2251017_c0_seq1	256.138	321.443	321.144	136.473	158.963	269.296	279.486	255.296	ref|XP_011436287.1| PREDICTED: calpain-7-like [Crassostrea gigas]	0	59	74	6
[truncated: 6,599 more rows]
