# Supplementary material for: Combined transcriptome and proteome profiling reveals specific molecular brain signatures for sex, maturation and circalunar clock phase
Source: eLife. 2019 Feb 15;8:e41556. doi: 10.7554/eLife.41556 (PMC6377233; doi:10.7554/eLife.41556)
Supplement: Figure 3—source data 14. — This file contains the IDs, mean expression values, top hit by blastX with e-value cut-off 10-4, e-value corresponding to blast hit, number of identical/ similar AA or gaps in blast alignment ("identity", "positives", "gaps") for all transcripts significantly regulated between males and females. [file elife-41556-fig3-data14.xlsx]

## Sheet: 20181211_allSex_meanExpressionP
compID	PM_NM_F_mean	PM_NM_M_mean	M_NM_F_mean	M_NM_M_mean	PM_FRFM_F_mean	PM_FRFM_M_mean	Top.hit.ID	E.value	Identity....	Positives....	Gaps....
comp1176386_c0_seq1	0.687152	19.4947	0.417457	4.1141	0.275015	10.0423	NA	NA	NA	NA	NA
comp1192792_c0_seq1	12.0813	9.80961	200.629	10.2683	5.81878	9.2645	emb|CUV05436.1| unnamed protein product [Cryptosporidium hominis]	2e-74	82	93	0
comp1193006_c0_seq1	0.443957	0.71344	511.277	125.775	0.825045	1.25426	NA	NA	NA	NA	NA
comp1194173_c0_seq1	21.1381	0.904088	30.5686	2.40259	14.0633	1.24536	ref|XP_013413425.1| PREDICTED: uncharacterized protein LOC106175817 [Lingula anatina]	8e-43	37	54	1
comp1194290_c0_seq1	871.252	1691.11	38.5369	316.333	552.305	1187.21	NA	NA	NA	NA	NA
comp1195459_c0_seq1	3.01334	0.837305	28.2876	1.2013	2.58805	3.47069	gb|ELT96049.1| hypothetical protein CAPTEDRAFT_223820 [Capitella teleta]	2e-11	34	57	3
comp1197949_c0_seq1	1651.23	1247.64	1451.45	1388.62	3430.43	666.207	NA	NA	NA	NA	NA
comp1281272_c0_seq1	731.112	1332.44	64.1614	307.768	643.248	1159.65	NA	NA	NA	NA	NA
comp1286751_c0_seq1	1.38477	3.10942	0	9.84211	5.87954	5.23204	NA	NA	NA	NA	NA
comp1317356_c0_seq1	18.4197	15.2244	5.52378	34.0402	9.9614	13.1652	NA	NA	NA	NA	NA
comp1326591_c0_seq1	56.2783	64.8166	52.5341	7.62077	45.841	45.0498	ref|XP_006821846.1| PREDICTED: centromere protein N-A-like isoform X2 [Saccoglossus kowalevskii]	7e-35	29	50	2
comp1330436_c0_seq1	13.8823	0	6.64658	1.54364	10.8065	0.764275	NA	NA	NA	NA	NA
comp1334554_c0_seq1	7.9178	6.57678	0	51.3762	0	0	ref|XP_003977920.1| PREDICTED: tetraspanin-31 [Takifugu rubripes]	3e-07	96	100	0
comp1340160_c0_seq1	55.9335	33.9349	60.2421	10.1779	43.5771	39.7357	gb|EKC25648.1| ATP-dependent DNA helicase PIF1 [Crassostrea gigas]	0	58	74	3
comp1547345_c0_seq1	34.613	4.92355	224.207	11.9027	41.0667	8.49661	ref|XP_013419481.1| PREDICTED: serine/threonine-protein kinase Nek3-like [Lingula anatina]	7e-99	56	75	2
comp1725465_c0_seq2	0.577397	2.0991	0.417457	256.75	1.46773	2.65603	NA	NA	NA	NA	NA
comp1879573_c0_seq1	0.454418	14.9641	0.417457	1.54364	0.275015	2.04817	NA	NA	NA	NA	NA
comp1934401_c0_seq1	15.4008	19.3499	2.79395	22.5904	18.6287	31.5625	ref|XP_013089441.1| PREDICTED: betaine--homocysteine S-methyltransferase 1-like [Biomphalaria glabrata]	8e-142	61	79	0
comp1940764_c2_seq1	2.04271	4.52242	22.9614	1.02683	2.54172	1.55819	dbj|BAE30902.1| unnamed protein product [Mus musculus]	2e-142	99	100	0
comp1941562_c0_seq1	3.29403	2.16588	22.9627	1.02683	4.24109	1.46105	pdb|3WNW|A Chain A, Structure Of Mouse H-chain Modified Ferritin pdb|3WNW|B Chain B, Structure Of Mouse H-chain Modified Ferritin pdb|3WNW|C Chain C, Structure Of Mouse H-chain Modified Ferritin pdb|3	8e-112	100	100	0
comp1946763_c1_seq1	2.60135	2.32127	1.6057	156.393	2.97597	1.38103	NA	NA	NA	NA	NA
comp1955979_c0_seq1	2.70341	0.788154	30.6327	0.852361	3.38702	0.667137	NA	NA	NA	NA	NA
comp1977405_c0_seq1	5.77241	6.78881	369.132	4.1141	5.00817	10.3587	ref|XP_008614658.1| hypothetical protein SDRG_10447 [Saprolegnia diclina VS20] ref|XP_012205390.1| hypothetical protein SPRG_10070 [Saprolegnia parasitica CBS 223.65] gb|EQC31930.1| hypothetical prote	4e-49	57	74	1
comp1979599_c0_seq1	14.1655	11.508	22.222	4.44966	14.3935	3.1875	ref|XP_002937301.1| PREDICTED: neuropeptide Y receptor type 2-like [Xenopus tropicalis] ref|XP_012815139.1| PREDICTED: neuropeptide Y receptor type 2-like [Xenopus tropicalis]	4e-12	32	48	13
comp1981028_c0_seq1	172.473	111.109	163.219	13.349	183.234	111.765	ref|XP_014455610.1| PREDICTED: hyaluronidase-3 isoform X3 [Alligator mississippiensis]	7e-56	30	50	10
comp1986706_c0_seq1	46.7802	63.015	26.4935	7.79524	58.5438	56.8106	NA	NA	NA	NA	NA
comp1996768_c0_seq1	3.144	6.17742	62.3947	6.24501	4.19476	5.37134	gb|ESS30966.1| putative fructose-bisphosphate aldolase [Toxoplasma gondii VEG] gb|KFH07434.1| putative fructose-bisphosphate aldolase [Toxoplasma gondii VAND] tpe|CEL76905.1| TPA: fructose-bisphosphat	0	75	82	0
comp2008730_c0_seq1_contamination	17.6584	16.529	250.656	22.1778	15.7253	11.7042	dbj|BAE25185.1| unnamed protein product [Mus musculus]	0	91	97	0
comp2016072_c0_seq1	201.535	111.544	18.6573	94.3023	124.646	153.405	NA	NA	NA	NA	NA
comp2020965_c0_seq1	35.4958	22.7181	10.8225	81.0034	33.161	29.9829	NA	NA	NA	NA	NA
comp2042029_c0_seq1	265.808	329.954	1397.79	6621.59	223.229	264.106	gb|AFQ35984.1| glutathione S-transferase sigma 2 [Mytilus galloprovincialis]	6e-55	48	64	3
comp2115354_c1_seq1	96.0422	119.47	170.351	30.6711	88.854	106.785	ref|XP_003229150.2| PREDICTED: deoxyuridine 5'-triphosphate nucleotidohydrolase, mitochondrial [Anolis carolinensis]	2e-62	73	82	1
comp2116603_c0_seq1	0.762171	1.09474	1.25237	372.02	0.55003	0.667137	NA	NA	NA	NA	NA
comp2132904_c0_seq1	3.45788	2.75171	53.844	3.94623	3.87342	3.14601	ref|YP_006989668.1| hypothetical protein CcrKarma_gp288 [Caulobacter phage karma] gb|AFU87805.1| hypothetical protein CcrKarma_gp288 [Caulobacter phage karma]	1e-45	49	64	3
comp2133746_c1_seq1	33.9945	4.65224	45.4674	3.68792	25.0959	1.40177	ref|XP_009061609.1| hypothetical protein LOTGIDRAFT_234958 [Lottia gigantea] gb|ESO87714.1| hypothetical protein LOTGIDRAFT_234958 [Lottia gigantea]	4e-25	40	58	13
comp2135534_c0_seq1_contamination	2.20597	3.805	76.3343	3.68114	5.83321	3.88955	ref|YP_009112414.1| cytochrome c oxidase subunit III (mitochondrion) [Mus spretus] gb|AIY72202.1| cytochrome c oxidase subunit III (mitochondrion) [Mus spretus]	8e-97	96	97	0
comp2138011_c0_seq1	613.763	37.1323	183.856	106.681	75.5467	396.402	NA	NA	NA	NA	NA
comp2138260_c0_seq2	26.6991	35.4956	45.1128	5.14093	26.8388	28.804	ref|XP_013398153.1| PREDICTED: myosin heavy chain, muscle-like [Lingula anatina]	2e-23	24	48	13
comp2138325_c0_seq1_contamination	143.416	194.084	2357.85	263.841	170.03	178.975	ref|XP_015320039.1| PREDICTED: collagen alpha-1(III) chain-like [Bos taurus]	3e-26	94	95	0
comp2138461_c0_seq1	5.07973	2.21503	25.6245	4.27519	39.4865	4.7717	gb|EGJ28961.1| cation/multidrug efflux pump [Moorea producens 3L]	5e-05	49	56	3
comp2138517_c0_seq1	7.2002	6.83201	32.3038	4.63072	4.64632	0.94143	NA	NA	NA	NA	NA
comp2139063_c0_seq1	232.226	198.311	265.259	103.975	241.456	197.631	gb|ELU10393.1| hypothetical protein CAPTEDRAFT_149484 [Capitella teleta]	8e-38	41	59	4
comp2139274_c0_seq1	3.62054	46.0987	1.18825	160.602	5.01399	16.5671	ref|XP_002605800.1| hypothetical protein BRAFLDRAFT_280063 [Branchiostoma floridae] gb|EEN61810.1| hypothetical protein BRAFLDRAFT_280063 [Branchiostoma floridae]	2e-67	36	59	4
comp2139301_c0_seq1	35.532	2.83017	74.7576	2.14429	20.9735	1.43141	NA	NA	NA	NA	NA
comp2139306_c0_seq1	3.64422	16.4942	1.6057	1.45301	3.91975	8.57595	NA	NA	NA	NA	NA
comp2139590_c0_seq1	269.942	287.314	2024.56	643.163	264.395	294.631	NA	NA	NA	NA	NA
comp2140374_c0_seq1	264.518	165.869	77.2988	870.443	236.361	247.004	NA	NA	NA	NA	NA
comp2140683_c0_seq1	674.787	1337.27	30.6994	255.44	439.581	865.413	NA	NA	NA	NA	NA
comp2140763_c0_seq1	1012.08	862.462	1989.35	972.873	906.655	728.454	ref|XP_011195565.1| PREDICTED: glycine cleavage system H protein, mitochondrial [Bactrocera cucurbitae]	2e-44	47	68	1
comp2140879_c0_seq1	0.778158	62.6146	2.72983	15.8626	1.88173	11.0548	NA	NA	NA	NA	NA
comp2141094_c0_seq2	7.02314	58.2286	1.54158	7.78864	11.5304	15.7916	ref|XP_009065094.1| hypothetical protein LOTGIDRAFT_210939 [Lottia gigantea] gb|ESO83965.1| hypothetical protein LOTGIDRAFT_210939 [Lottia gigantea]	7e-08	25	43	6
comp2141575_c0_seq1	14.6817	20.8559	15.7024	424.896	19.2105	24.6804	ref|XP_011417546.1| PREDICTED: protein FAM166B-like [Crassostrea gigas] gb|EKC24169.1| hypothetical protein CGI_10006712 [Crassostrea gigas]	3e-92	52	64	2
comp2142005_c0_seq1_contamination	2.64223	4.47524	49.5464	3.94623	4.18894	2.38174	ref|YP_009092031.1| cytochrome b (mitochondrion) [Mus cervicolor] gb|AHZ60900.1| cytochrome b (mitochondrion) [Mus cervicolor]	1e-105	90	95	0
comp2142040_c0_seq1	281.197	357.281	114.509	14.6475	225.922	95.9061	NA	NA	NA	NA	NA
comp2142244_c0_seq1	52.5277	54.7712	165.492	49.3724	44.7061	61.6755	ref|XP_011257460.1| PREDICTED: sterile alpha motif domain-containing protein 5-like, partial [Camponotus floridanus]	1e-28	67	85	0
comp2142866_c0_seq1	2078.31	2009.47	1611.67	854.581	2430.9	2109.77	gb|ELT98159.1| hypothetical protein CAPTEDRAFT_226124 [Capitella teleta]	0	72	84	0
comp2143384_c0_seq1	1.93019	23.7048	1.95904	0	0.845299	5.07563	NA	NA	NA	NA	NA
comp2158971_c0_seq1	6.44479	5.64295	0	92.3901	0.845299	0.911792	NA	NA	NA	NA	NA
comp2186444_c0_seq1	9.80218	5.21448	2.02316	116.961	8.40396	9.99847	NA	NA	NA	NA	NA
comp2188826_c0_seq1	1.56678	3.91323	6.77483	2.30537	72.4759	3.04887	ref|XP_013071443.1| PREDICTED: uncharacterized protein LOC106058534, partial [Biomphalaria glabrata]	6e-72	31	50	13
comp2194038_c0_seq1	0.245959	0.805787	9.79255	125.534	1.94536	0.460344	NA	NA	NA	NA	NA
comp2195604_c0_seq1	3.88465	5.28126	0	25.0202	8.27941	9.1624	ref|XP_013122893.1| PREDICTED: uncharacterized protein LOC106097361, partial [Oreochromis niloticus]	1e-33	34	54	4
comp2197409_c0_seq2	215.612	200.137	1194.15	271.356	190.172	232.216	gb|ELT96604.1| hypothetical protein CAPTEDRAFT_160862 [Capitella teleta]	4e-165	68	82	1
comp2197726_c1_seq1	2.68958	124.761	26.2657	34.7784	3.36972	12.3002	NA	NA	NA	NA	NA
comp2197826_c0_seq1	91.937	83.7948	900.158	287.105	97.1703	88.1106	ref|XP_015255257.1| PREDICTED: solute carrier family 43 member 3-like [Cyprinodon variegatus] ref|XP_015255258.1| PREDICTED: solute carrier family 43 member 3-like [Cyprinodon variegatus] ref|XP_01525	2e-50	31	46	6
comp2199866_c0_seq1	2.32895	1.55075	0.417457	301.862	2.85724	2.28393	NA	NA	NA	NA	NA
comp2200217_c0_seq1	20.162	1.99882	9.21545	6.5167	12.2193	2.43212	ref|XP_011504765.1| PREDICTED: fibrillin-1 [Ceratosolen solmsi marchali]	2e-16	49	64	4
comp2200231_c1_seq1	2.77782	1731.92	9.0244	7.37585	3.32044	150.668	NA	NA	NA	NA	NA
comp2201951_c0_seq1	1.50775	0.571943	0	1.96982	51.7691	2.22532	ref|XP_014679242.1| PREDICTED: uncharacterized protein LOC106819095 isoform X2 [Priapulus caudatus]	2e-100	51	67	6
comp2204915_c0_seq1	102.612	101.548	81.8163	20.3759	103.395	73.6842	gb|ELT92262.1| hypothetical protein CAPTEDRAFT_220209 [Capitella teleta]	1e-34	68	87	2
comp2205550_c0_seq1	13.0048	0	15.7037	4.36582	17.051	3.49965	NA	NA	NA	NA	NA
comp2206373_c0_seq1	8.36667	34.6306	3.14728	160.867	5.46554	33.6229	NA	NA	NA	NA	NA
comp2206927_c0_seq1	2.9008	49.5964	2.85808	16.4632	4.90969	21.2617	NA	NA	NA	NA	NA
comp2206945_c0_seq1_contamination	13.1657	26.5138	191.222	20.9967	10.4826	16.1548	ref|XP_012040812.1| PREDICTED: elongation factor 1-alpha 1-like isoform X1 [Ovis aries]	0	97	98	1
comp2210600_c0_seq1	7.42525	5.55258	273.775	12.0772	3.67081	9.56481	NA	NA	NA	NA	NA
comp2215230_c0_seq1	20.8282	2.61992	13.4227	9.07378	17.1667	3.93993	ref|XP_002597706.1| hypothetical protein BRAFLDRAFT_121667 [Branchiostoma floridae] gb|EEN53718.1| hypothetical protein BRAFLDRAFT_121667 [Branchiostoma floridae]	1e-27	39	51	7
comp2217620_c0_seq2	16.0847	6.16551	468.752	90.0709	43.6525	25.3255	ref|XP_013399145.1| PREDICTED: uncharacterized protein LOC106165487 [Lingula anatina]	2e-09	30	48	12
comp2218507_c0_seq9	783.998	732.263	662.53	239.601	872.341	601.313	ref|XP_013392125.1| PREDICTED: uncharacterized protein LOC106160152 isoform X2 [Lingula anatina]	9e-07	27	45	15
comp2219607_c0_seq1	18.559	16.0053	14.9002	62.1978	19.2568	10.4796	NA	NA	NA	NA	NA
comp2220651_c0_seq1	1.778	0.71344	0	52.2186	0.891628	0.333568	NA	NA	NA	NA	NA
comp2221143_c1_seq5	1.59322	7.64352	96.3316	0.600649	2.11042	2.74427	ref|XP_011452054.1| PREDICTED: uncharacterized protein LOC105345566 [Crassostrea gigas]	3e-43	45	66	1
comp2221239_c0_seq1	119.318	181.099	133.069	24.4966	92.8917	125.54	ref|XP_013392997.1| PREDICTED: carboxy-terminal kinesin 2-like [Lingula anatina]	0	55	73	4
comp2221321_c1_seq1	0.791382	1.98119	25.4609	0	0.570284	1.33427	ref|YP_009047132.1| replication-associated protein [McMurdo Ice Shelf pond-associated circular DNA virus-3] gb|AIF71507.1| replication-associated protein [McMurdo Ice Shelf pond-associated circular DN	6e-13	58	75	0
comp2221747_c1_seq1	38.5745	2.21503	50.0254	0.42618	28.7318	1.12748	ref|XP_014276533.1| PREDICTED: beta-1,4-N-acetylgalactosaminyltransferase bre-4-like isoform X7 [Halyomorpha halys] ref|XP_014276534.1| PREDICTED: beta-1,4-N-acetylgalactosaminyltransferase bre-4-like	5e-65	41	58	3
comp2222433_c0_seq1	0.596147	47.8222	0	2.57047	0	8.01485	NA	NA	NA	NA	NA
comp2222760_c0_seq2	3.87636	4.23745	40.3611	3.42283	4.59999	3.35281	ref|XP_014217404.1| PREDICTED: Y+L amino acid transporter 2 [Copidosoma floridanum] ref|XP_014217405.1| PREDICTED: Y+L amino acid transporter 2 [Copidosoma floridanum] ref|XP_014217406.1| PREDICTED: Y	3e-37	47	74	1
comp2222948_c0_seq2	31.6877	49.0674	58.4387	5.12755	17.879	36.1699	ref|XP_013415462.1| PREDICTED: kinetochore protein NDC80 homolog [Lingula anatina]	1e-39	30	52	4
comp2222988_c0_seq1	82.6427	85.0121	35.6762	10.4429	77.6388	74.5101	ref|XP_003795093.1| PREDICTED: centromere protein P [Otolemur garnettii]	5e-09	24	48	7
comp2223254_c0_seq1	2.04547	3.10149	2507.89	11689.8	1.23905	1.46105	ref|XP_011437078.1| PREDICTED: uncharacterized protein LOC105335088 [Crassostrea gigas] gb|EKC27421.1| hypothetical protein CGI_10025411 [Crassostrea gigas]	2e-28	43	54	7
comp2223281_c0_seq1	13.7137	10.1678	0	29.2113	12.891	25.4018	NA	NA	NA	NA	NA
comp2223979_c0_seq1	3.96796	3.64787	3.9822	238.539	4.61442	3.39956	NA	NA	NA	NA	NA
comp2224365_c0_seq1	1.94124	2.22297	0.834915	186.547	0.321343	1.25426	NA	NA	NA	NA	NA
comp2224545_c0_seq1	3.47603	7.42135	107.896	18.5536	11.0613	6.46918	ref|XP_013392414.1| PREDICTED: collagen alpha-4(VI) chain-like, partial [Lingula anatina]	6e-21	29	42	21
comp2224691_c0_seq1	4.49187	3.29214	46.5628	3.51346	3.15833	3.14601	gb|ELT93632.1| hypothetical protein CAPTEDRAFT_191770 [Capitella teleta]	8e-84	36	53	10
comp2224691_c1_seq1	6.15516	1.88289	49.6761	2.05366	2.31303	1.12748	ref|XP_002611732.1| hypothetical protein BRAFLDRAFT_98697 [Branchiostoma floridae] gb|EEN67742.1| hypothetical protein BRAFLDRAFT_98697 [Branchiostoma floridae]	2e-28	39	56	12
comp2225010_c0_seq1	1.03458	31.9921	0.834915	13.8927	0.642687	10.7977	NA	NA	NA	NA	NA
comp2225756_c0_seq1	53.6344	61.7048	5.42695	39.7587	131.326	13.6367	NA	NA	NA	NA	NA
comp2226330_c0_seq1	329.044	336.687	364.564	169.664	323.142	360.127	ref|XP_013406663.1| PREDICTED: N-alpha-acetyltransferase 40-like [Lingula anatina]	2e-84	57	73	4
comp2226460_c0_seq1	1085.67	10.3622	846.523	8.98994	833.612	9.11564	NA	NA	NA	NA	NA
comp2226802_c0_seq1	0.350188	16.9114	0	17.5807	0.570284	4.16384	ref|XP_002636308.1| Hypothetical protein CBG08601 [Caenorhabditis briggsae] emb|CAP28421.1| Protein CBG08601, partial [Caenorhabditis briggsae]	1e-11	32	48	3
comp2226803_c0_seq1	31.4561	25.4477	37.8276	397.922	20.0039	19.0012	gb|ELU09892.1| hypothetical protein CAPTEDRAFT_207681 [Capitella teleta]	5e-53	50	67	3
comp2228911_c0_seq1	19.1714	24.6391	5.71615	57.8148	22.5832	23.2276	NA	NA	NA	NA	NA
comp2229376_c0_seq1	5.83479	3.89758	5.10632	48.292	7.35596	3.67748	NA	NA	NA	NA	NA
comp2229493_c0_seq1	2.90911	604.306	4.11045	138.921	6.79724	130.367	NA	NA	NA	NA	NA
comp2230112_c0_seq2	0.227209	15.6749	0.417457	3.08728	0	2.93922	NA	NA	NA	NA	NA
comp2230134_c0_seq1	39.0979	26.6551	70.6104	14.1945	36.3225	37.6247	ref|XP_013379345.1| PREDICTED: DNA replication complex GINS protein PSF3-like [Lingula anatina]	7e-85	66	78	0
comp2230739_c0_seq2	17.6802	1.29331	0.834915	1.2013	10.6735	1.76498	ref|XP_006819272.1| PREDICTED: BTB/POZ domain-containing protein KCTD4-like [Saccoglossus kowalevskii]	2e-22	46	70	4
comp2231117_c0_seq1	2.27544	107.571	1.18825	0	1.19272	15.6234	ref|XP_002730715.1| PREDICTED: cornifelin-like isoform X1 [Saccoglossus kowalevskii] ref|XP_006811529.1| PREDICTED: cornifelin-like isoform X2 [Saccoglossus kowalevskii]	3e-07	33	39	3
comp2231173_c0_seq2	1.00537	34.7897	0.77079	17.4062	0.321343	8.4663	NA	NA	NA	NA	NA
comp2231489_c0_seq1	0.914361	2.65341	0.417457	320.242	1.78908	3.29353	NA	NA	NA	NA	NA
comp2231629_c1_seq1	510.589	455.965	864.645	355.085	496.651	540.118	ref|XP_009046427.1| hypothetical protein LOTGIDRAFT_212487 [Lottia gigantea] gb|ESP02957.1| hypothetical protein LOTGIDRAFT_212487 [Lottia gigantea]	3e-112	77	89	0
comp2231738_c0_seq1	166.207	19.4269	99.3495	36.3923	140.492	17.9761	ref|XP_013383271.1| PREDICTED: uncharacterized protein LOC106153735 isoform X8 [Lingula anatina]	1e-23	35	48	13
comp2232214_c0_seq1	0.823356	1.16945	1.66983	473.526	1.48799	0	NA	NA	NA	NA	NA
comp2232900_c0_seq1	113.991	78.7178	68.2732	30.5803	98.23	69.1217	ref|XP_011448164.1| PREDICTED: BTB/POZ domain-containing protein 6-B-like [Crassostrea gigas] gb|EKC37200.1| BTB/POZ domain-containing protein 3 [Crassostrea gigas]	6e-18	27	48	9
comp2232909_c0_seq1	2.26222	5.53251	5.105	41.7716	2.75311	2.09855	sp|P02219.1|GLB1_TYLHE RecName: Full=Extracellular globin-1; AltName: Full=Erythrocruorin; AltName: Full=Extracellular globin I prf||0812179A hemoglobin	1e-43	57	71	1
comp2233436_c0_seq2	7.36344	0.45601	7.19361	0	6.5483	1.38103	ref|XP_013397726.1| PREDICTED: uncharacterized protein LOC106164376 [Lingula anatina]	3e-30	43	69	3
comp2233645_c0_seq1	0.106992	0	0	555.535	0.570284	0.303931	NA	NA	NA	NA	NA
comp2234324_c0_seq2	9.99583	18.2168	27133.4	8043.55	20.71	157.751	ref|XP_013407933.1| PREDICTED: putative ferric-chelate reductase 1 [Lingula anatina]	6e-19	34	56	5
comp2234441_c0_seq1	32.1038	21.1195	44.1575	75.1042	4.8345	84.6637	NA	NA	NA	NA	NA
comp2234463_c0_seq2	2.34985	29.4262	22.3149	1982.57	2.03802	8.31056	gb|AAD34267.1|AF084419_1 calmodulin mutant SYNCAM64A [synthetic construct]	4e-52	61	78	0
comp2235000_c0_seq2	0	10.5316	0	6.17455	1.19272	3.39956	NA	NA	NA	NA	NA
comp2235466_c0_seq1	3.39056	2.91877	23.9547	2.14429	5.33533	2.65603	ref|XP_006812630.1| PREDICTED: putative GPI-anchored protein PB15E9.01c-like [Saccoglossus kowalevskii]	1e-13	47	59	0
comp2235485_c0_seq1	6.79317	4.52242	139.454	2.82218	8.45881	1.57893	ref|XP_011422529.1| PREDICTED: CD151 antigen-like [Crassostrea gigas]	4e-16	29	49	9
comp2236190_c0_seq1	55.0677	1.28538	78.1914	0	29.551	2.83319	ref|XP_003726943.2| PREDICTED: myoblast determination protein 1 homolog 2-like [Strongylocentrotus purpuratus]	5e-06	44	63	0
comp2236726_c0_seq1	1.92525	17.2832	0.834915	2.57047	1.23905	2.95996	ref|XP_013793026.1| PREDICTED: uncharacterized protein LOC106476960, partial [Limulus polyphemus]	4e-15	40	57	2
comp2236777_c0_seq2	19.0773	23.7989	25.7501	140.595	29.1603	12.9607	NA	NA	NA	NA	NA
comp2236994_c0_seq1	7.38678	7.60055	12.9425	480.497	16.0002	5.54849	NA	NA	NA	NA	NA
comp2237480_c0_seq2	94.6827	147.451	16.1212	94.4866	167.532	48.5965	ref|XP_006812863.1| PREDICTED: RNA-directed DNA polymerase from mobile element jockey-like, partial [Saccoglossus kowalevskii]	4e-43	42	64	0
comp2238090_c0_seq1	10.904	15.2716	85.8352	17.6439	7.45723	12.6552	ref|XP_013387585.1| PREDICTED: synaptic vesicular amine transporter-like [Lingula anatina]	4e-63	32	53	5
comp2238128_c0_seq1	46.8181	80.1336	216.068	23.7917	43.0303	24.9339	NA	NA	NA	NA	NA
comp2238162_c0_seq2	28.2637	23.4622	146.208	33.8081	50.3718	28.6302	NA	NA	NA	NA	NA
comp2238171_c0_seq1	6.79772	5.79612	2.37649	100.833	6.03017	6.02958	NA	NA	NA	NA	NA
comp2238321_c0_seq1	0.657941	2.22297	1.66983	170.118	1.94536	0.764275	NA	NA	NA	NA	NA
comp2238628_c0_seq1	2.18444	1.99882	1.25237	128.581	2.33329	7.64342	NA	NA	NA	NA	NA
comp2238758_c0_seq1	17.2237	13.4758	6.35738	457.396	14.3125	14.2802	NA	NA	NA	NA	NA
comp2238763_c0_seq1	2.03994	1.94372	70.1929	8.57055	2.85724	1.68496	ref|XP_009026443.1| hypothetical protein HELRODRAFT_102572 [Helobdella robusta] gb|ESN95585.1| hypothetical protein HELRODRAFT_102572 [Helobdella robusta]	1e-53	41	59	7
comp2239022_c0_seq1	2908.79	2985.48	1495.72	4647.04	2979.52	3544.03	NA	NA	NA	NA	NA
comp2239193_c0_seq2	8.26522	10.1107	33.0746	0.600649	0.642687	0.460344	NA	NA	NA	NA	NA
comp2239667_c0_seq1	1.71403	30.9073	1.25237	94.833	2.99623	8.75838	gb|ELT98011.1| hypothetical protein CAPTEDRAFT_204557 [Capitella teleta]	1e-08	39	58	1
comp2239711_c0_seq1	13.4183	2.91084	40.4907	2.396	9.81659	0.920688	NA	NA	NA	NA	NA
comp2239753_c0_seq1	129.15	5.76658	374.014	6.16776	117.932	6.55742	ref|XP_002605736.1| hypothetical protein BRAFLDRAFT_190162 [Branchiostoma floridae] gb|EEN61746.1| hypothetical protein BRAFLDRAFT_190162, partial [Branchiostoma floridae]	5e-17	56	71	1
comp2239871_c0_seq1	5.06157	3.16232	2.37649	184.847	8.29401	9.46928	NA	NA	NA	NA	NA
comp2239973_c0_seq1	14.4413	13.4295	2.37649	33.406	10.3522	14.0184	ref|XP_002599964.1| hypothetical protein BRAFLDRAFT_212201 [Branchiostoma floridae] gb|EEN55976.1| hypothetical protein BRAFLDRAFT_212201 [Branchiostoma floridae]	3e-41	43	66	1
comp2240042_c0_seq1	0.807369	74.2531	1.66983	2.14429	0.642687	10.9873	ref|XP_007900407.1| PREDICTED: protocadherin Fat 3 [Callorhinchus milii]	9e-08	39	54	3
comp2240804_c0_seq1	4.42514	64.6919	12.6506	9.93293	5.46554	23.3988	ref|XP_011441419.1| PREDICTED: uncharacterized protein LOC105338123 [Crassostrea gigas]	1e-10	25	41	9
comp2240935_c0_seq1	3.06406	48.369	3.56474	8.05355	4.4032	8.16237	ref|XP_013791986.1| PREDICTED: probable histone-lysine N-methyltransferase PRDM7, partial [Limulus polyphemus]	1e-25	58	70	2
comp2240992_c0_seq1	14.8327	19.7495	270.953	32.285	20.9593	20.5811	NA	NA	NA	NA	NA
comp2241111_c0_seq1	24.3745	26.2033	20.0052	70.7414	18.5853	18.2445	ref|XP_013420924.1| PREDICTED: uncharacterized protein LOC106181165 isoform X2 [Lingula anatina]	4e-74	48	63	9
comp2241380_c0_seq2	5.30753	7.64352	0.77079	334.031	3.29732	4.6953	ref|NP_001033371.1| Uncharacterized protein CELE_T15B12.1 [Caenorhabditis elegans] emb|CCD71621.1| Uncharacterized protein CELE_T15B12.1 [Caenorhabditis elegans]	8e-09	44	55	3
comp2241541_c0_seq2	1588.36	2024.65	404.776	898.405	1686.17	1888.78	gb|ELU17025.1| hypothetical protein CAPTEDRAFT_187682 [Capitella teleta]	1e-27	64	92	0
comp2241744_c0_seq2	407.675	405.61	44.4781	147.392	519.397	473.043	NA	NA	NA	NA	NA
comp2242278_c0_seq1	325.957	354.549	365.552	152.818	326.099	337.121	ref|XP_013398116.1| PREDICTED: polycomb protein EED-like [Lingula anatina]	0	66	80	1
comp2242849_c0_seq1	3.90678	3.93086	162.91	6.75503	4.00945	6.39278	ref|WP_051152367.1| terminase [Fodinicurvata sediminis]	9e-68	54	71	0
comp2243066_c0_seq1	4.26742	0	2.37649	2.82218	2.15675	2.63529	ref|XP_009019932.1| hypothetical protein HELRODRAFT_161804 [Helobdella robusta] gb|ESO02524.1| hypothetical protein HELRODRAFT_161804 [Helobdella robusta]	2e-53	45	58	1
comp2243340_c0_seq1	22.5128	16.8616	18.5291	276.831	24.5084	26.3393	NA	NA	NA	NA	NA
comp2243381_c1_seq2	1.54309	2.59633	4.17457	158.907	1.44166	3.01034	NA	NA	NA	NA	NA
comp2243479_c0_seq1	14.7213	6.14788	241.412	27.8486	11.4638	4.76348	gb|ELU11980.1| hypothetical protein CAPTEDRAFT_183785 [Capitella teleta]	5e-26	36	58	3
comp2244049_c0_seq3	60.3548	2.78698	68.493	6.24501	33.8211	0.637499	NA	NA	NA	NA	NA
comp2244112_c0_seq1	14.1375	4.92332	27.2616	1.45301	4.57391	4.04068	NA	NA	NA	NA	NA
comp2244207_c0_seq1	118.977	119.794	313.745	769.597	111.254	101.333	ref|XP_012273812.1| PREDICTED: cyclin-dependent kinase 7 [Orussus abietinus]	2e-180	73	86	2
comp2244330_c0_seq1	106.998	57.2775	214.017	69.0906	78.4547	56.3914	ref|XP_014667252.1| PREDICTED: mitochondrial fission regulator 1-like isoform X1 [Priapulus caudatus]	5e-18	59	76	9
comp2244379_c0_seq1	12.9605	0.190648	117.555	0.600649	6.29059	0.793913	NA	NA	NA	NA	NA
comp2244843_c0_seq4	0.58016	118.369	4.33553	0.42618	0.275015	16.9073	NA	NA	NA	NA	NA
comp2245017_c0_seq1	139.23	64.1303	166.658	22.6176	96.4779	48.6571	gb|EKC21132.1| hypothetical protein CGI_10004536 [Crassostrea gigas]	3e-17	47	62	9
comp2245447_c0_seq1	0.703139	1.33453	0.834915	893.401	0.845299	2.01853	NA	NA	NA	NA	NA
comp2245483_c2_seq1	3.65744	3.55155	86.2394	5.74158	4.30472	6.10597	ref|WP_057468946.1| hypothetical protein [Rhizobium sp. Root1203] gb|KQV28139.1| hypothetical protein ASC97_07265 [Rhizobium sp. Root1203]	6e-11	37	59	2
comp2245788_c0_seq1	174.161	241.772	39.5615	129.133	222.809	228.838	NA	NA	NA	NA	NA
comp2245797_c0_seq4	71.0676	48.9621	0	12.3489	63.1406	68.894	NA	NA	NA	NA	NA
comp2246063_c0_seq1	192.425	238.269	136.343	48.3925	189.371	207.1	NA	NA	NA	NA	NA
comp2246134_c0_seq1	1.98368	33.423	2.02316	14.7383	2.56197	7.24168	ref|XP_007520934.1| PREDICTED: slit homolog 3 protein [Erinaceus europaeus]	1e-07	35	50	6
comp2246361_c0_seq1	428.491	526.313	545.57	73.4158	275.314	407.934	gb|ELU12874.1| hypothetical protein CAPTEDRAFT_155362 [Capitella teleta]	0	81	92	0
comp2246681_c1_seq1	2.46022	0	0	1.62748	1.67034	1.43141	NA	NA	NA	NA	NA
comp2246786_c0_seq1	3.93538	3.37655	50.6732	6.41269	4.19476	3.53819	ref|XP_013378900.1| PREDICTED: uncharacterized protein LOC106150566 [Lingula anatina]	7e-99	63	76	2
comp2247082_c0_seq2	3769.86	1999.31	2720.19	426.098	2964.71	2453.15	gb|ELU08071.1| hypothetical protein CAPTEDRAFT_227744 [Capitella teleta]	3e-49	51	70	3
comp2247149_c0_seq3	6.67631	5.23806	12.2332	298.133	6.05608	5.6071	NA	NA	NA	NA	NA
comp2247380_c0_seq1	311.354	147.624	95.0807	5.55373	126.768	92.9415	NA	NA	NA	NA	NA
comp2247432_c0_seq1	15.0921	284.104	15.6383	22.1006	12.1384	22.9368	ref|XP_012937090.1| PREDICTED: receptor-type tyrosine-protein phosphatase T-like [Aplysia californica]	6e-25	38	46	17
comp2247532_c0_seq3	32.0056	34.3852	31.147	2.99665	31.1032	30.6197	NA	NA	NA	NA	NA
comp2247542_c0_seq2	18.8797	15.2875	9.79387	30.2244	17.2044	18.4084	NA	NA	NA	NA	NA
comp2247702_c0_seq1	0.457181	0.522793	0	242.71	0	0	NA	NA	NA	NA	NA
comp2248059_c0_seq4	885.514	1344.86	64.3223	216.082	961.507	1086.08	NA	NA	NA	NA	NA
comp2248189_c1_seq1	2.21365	4.7858	0.417457	20.5773	0.871374	2.6175	NA	NA	NA	NA	NA
comp2248564_c0_seq6	5.3395	5.55435	38.9203	5.47649	5.56402	2.09855	NA	NA	NA	NA	NA
comp2248813_c0_seq1	10.7006	8.23132	114.829	13.9496	10.3752	15.1159	gb|KPK78605.1| cyclase [candidate division Zixibacteria bacterium SM23_73]	4e-38	36	55	6
comp2248818_c0_seq1	9.04554	8.65781	43.863	289.461	14.8133	15.4663	ref|XP_013062016.1| PREDICTED: CBL-interacting protein kinase 28-like [Biomphalaria glabrata]	9e-25	35	53	7
comp2248939_c0_seq3	17.8943	25.3155	2.85808	113.427	13.9911	20.4129	gb|EKC30966.1| hypothetical protein CGI_10019766 [Crassostrea gigas]	0.0001	22	44	15
comp2248976_c0_seq1	4636.59	4239.29	8011.14	2826.98	3369.98	2723.99	gb|ELT91965.1| hypothetical protein CAPTEDRAFT_228725 [Capitella teleta]	4e-66	35	54	5
comp2249035_c0_seq1	21.8822	1.05352	12.5878	25.6911	25.3967	19.0742	ref|XP_011677077.1| PREDICTED: RNA-directed DNA polymerase from mobile element jockey-like [Strongylocentrotus purpuratus]	1e-25	31	55	3
comp2249046_c0_seq1	16.4535	13.6054	0	11.3993	17.8877	19.0562	ref|XP_002613912.1| hypothetical protein BRAFLDRAFT_98514 [Branchiostoma floridae] gb|EEN69921.1| hypothetical protein BRAFLDRAFT_98514 [Branchiostoma floridae]	4e-43	45	65	3
comp2249058_c0_seq2	1418.7	1944.71	171.037	488.308	1390.83	1865.22	NA	NA	NA	NA	NA
comp2249213_c0_seq3	21.1649	24.1406	9.0244	85.8763	13.7103	18.7308	NA	NA	NA	NA	NA
comp2249379_c0_seq1	2.06639	40.5483	0.417457	4.1141	0.321343	23.2477	NA	NA	NA	NA	NA
comp2249595_c0_seq1	14.5907	17.013	46.3377	8.73144	9.38529	15.6826	ref|XP_009060998.1| hypothetical protein LOTGIDRAFT_234610 [Lottia gigantea] gb|ESO88282.1| hypothetical protein LOTGIDRAFT_234610 [Lottia gigantea]	2e-32	30	45	16
comp2250208_c0_seq1	116.132	98.5192	118.591	10.3657	62.1334	63.1461	NA	NA	NA	NA	NA
comp2250225_c0_seq2	238.414	179.973	10834.3	25749.3	143.072	183.734	NA	NA	NA	NA	NA
comp2250367_c0_seq2	3.43361	52.3857	1.6057	163.018	3.17859	34.2024	NA	NA	NA	NA	NA
comp2250456_c0_seq1	92.5138	4.35161	26.3011	3.84901	57.0757	6.96739	NA	NA	NA	NA	NA
comp2250603_c0_seq1	1.11236	10.2599	2.02316	2.05366	5.03424	4.95775	NA	NA	NA	NA	NA
comp2250615_c0_seq1	5.73056	8.10635	445.867	5.91605	13.6146	2.19569	gb|ACF25902.1| GST1 [Azumapecten farreri]	1e-59	44	60	2
comp2250646_c0_seq1	7.06954	6.72357	13.3272	113.799	12.3845	15.5338	ref|XP_010005565.1| PREDICTED: transmembrane protease serine 9 [Chaetura pelagica]	6e-10	29	46	8
comp2250838_c0_seq2	0.106992	0.141497	0	82.1483	0.321343	0	NA	NA	NA	NA	NA
comp2250941_c0_seq1	3.97566	2.54343	41.0978	0.852361	2.33911	4.08744	gb|AHA86927.1| ORF1 [Tombunodavirus UC1]	1e-05	35	58	1
comp2250963_c0_seq1	7.6706	6.98936	3.9822	36.4226	10.4593	7.09778	NA	NA	NA	NA	NA
comp2251008_c0_seq2	1.86346	3.7541	81.9158	5.48308	6.77699	7.6174	ref|XP_008280196.1| PREDICTED: uncharacterized protein LOC103357415 [Stegastes partitus]	2e-86	50	71	1
comp2251221_c0_seq1	212.831	195.235	52.1206	263.199	199.211	200.526	NA	NA	NA	NA	NA
comp2251291_c0_seq2	3.22791	25.7737	6.35738	100.078	2.88332	24.2899	NA	NA	NA	NA	NA
comp2251343_c0_seq4	8.31869	0.615139	0.417457	0.852361	2.62856	1.43141	ref|WP_030477213.1| hypothetical protein [Lentzea albidocapillata]	7e-05	37	62	12
comp2251363_c0_seq1	0.810132	1.15182	0	1773.62	0.275015	0.920688	NA	NA	NA	NA	NA
comp2251434_c0_seq1	409.234	269.776	303.93	27.6512	297.359	258.308	emb|CBY35502.1| unnamed protein product [Oikopleura dioica]	5e-05	35	48	6
comp2251440_c0_seq1_contamination	1.46807	2.31531	29.7716	0	1.28537	1.09784	dbj|BAE38023.1| unnamed protein product [Mus musculus]	1e-36	89	89	1
comp2251501_c0_seq2	656.003	649.91	2109.86	215.851	518.577	499.994	NA	NA	NA	NA	NA
comp2251540_c0_seq1	1.25409	178.276	1.66983	4.71475	2.81091	37.0267	NA	NA	NA	NA	NA
comp2251682_c0_seq3	38.2382	44.8953	28.8987	313.646	32.096	27.9647	gb|KFV66571.1| Sentrin-specific protease 2, partial [Picoides pubescens]	3e-44	34	56	5
comp2251705_c0_seq1	36069	34414.9	46190.9	23197.7	39382.7	40538.5	gb|ABX75386.1| 60S ribosomal protein L40A [Lycosa singoriensis]	3e-76	97	100	0
comp2251755_c0_seq1	13.3455	4.3494	44.6993	4.27519	13.829	7.15706	ref|XP_006007644.1| PREDICTED: N-acylethanolamine-hydrolyzing acid amidase-like [Latimeria chalumnae]	3e-08	26	48	4
comp2251798_c0_seq1	3064.65	3386.01	5303.32	2374.89	3489.45	3522.14	ref|XP_009032058.1| hypothetical protein HELRODRAFT_186249 [Helobdella robusta] gb|ESN89828.1| hypothetical protein HELRODRAFT_186249 [Helobdella robusta]	3e-50	57	73	0
comp2251806_c0_seq1	1039.21	1071.3	1367.49	534.28	1013.58	1178.5	gb|ELU12067.1| hypothetical protein CAPTEDRAFT_20975 [Capitella teleta]	6e-58	69	84	1
comp2252017_c0_seq1	46.6935	53.6102	16.3777	4.79859	37.3156	36.2822	NA	NA	NA	NA	NA
comp2252040_c0_seq1	86.9785	82.253	96.5595	25.0202	61.9974	90.0468	ref|XP_009910069.1| PREDICTED: mitotic spindle assembly checkpoint protein MAD2A [Picoides pubescens] gb|KFV63911.1| Mitotic spindle assembly checkpoint protein MAD2A [Picoides pubescens]	2e-85	64	85	1
comp2252156_c0_seq4	10.3079	969.548	8.38186	194.988	23.9873	166.713	NA	NA	NA	NA	NA
comp2252319_c0_seq2	41.0707	71.0488	23.6668	81.9662	40.1147	89.0102	NA	NA	NA	NA	NA
comp2252342_c0_seq4	10.3647	0.190648	0.834915	1.45301	5.72908	2.17494	ref|XP_007537286.1| PREDICTED: rhox homeobox family member 1 [Erinaceus europaeus]	1e-07	48	64	12
comp2252412_c0_seq1	228.702	215.641	120.68	512.356	204.105	311.736	ref|XP_011419880.1| PREDICTED: sodium-coupled monocarboxylate transporter 1-like [Crassostrea gigas] ref|XP_011419881.1| PREDICTED: sodium-coupled monocarboxylate transporter 1-like [Crassostrea gigas	2e-147	41	61	8
comp2252443_c0_seq2	1.69528	1.09474	3.27553	128.521	0.596359	1.25426	NA	NA	NA	NA	NA
comp2252595_c0_seq1	1.13881	1.2186	2.37649	176.504	0.321343	1.84138	NA	NA	NA	NA	NA
comp2252742_c0_seq1	4.31754	3.40807	1.25237	790.902	4.67239	4.42991	ref|WP_017313028.1| hypothetical protein [Fischerella sp. PCC 9339]	3e-06	27	50	0
comp2253589_c0_seq1	142.432	61.6931	655.832	3579.33	101.373	129.345	NA	NA	NA	NA	NA
comp2253679_c0_seq3	2242.04	1895.91	177.589	906.169	1713	1196.23	gb|AIZ77503.1| enteropeptidase [Platynereis dumerilii]	6e-47	39	60	5
comp2253801_c0_seq1	43.3973	31.2515	3102.72	474.178	54.0537	73.1287	NA	NA	NA	NA	NA
comp2253972_c0_seq1	1019.31	954.576	2184.87	974.504	909.405	1062.56	ref|XP_014781213.1| PREDICTED: 26S proteasome non-ATPase regulatory subunit 14 [Octopus bimaculoides] gb|KOF76141.1| hypothetical protein OCBIM_22033745mg [Octopus bimaculoides]	0	91	94	0
comp2253990_c0_seq2	11.9404	0.50516	0	0	6.89572	0.637499	NA	NA	NA	NA	NA
comp2253996_c0_seq1	15.3501	14.7691	3.62887	36.5031	13.0705	15.6523	NA	NA	NA	NA	NA
comp2254063_c0_seq2	2.40612	1.83374	97.4586	1.96982	3.09175	1.7146	NA	NA	NA	NA	NA
comp2254076_c0_seq1	9.45197	8.31597	74.3701	1.45301	15.7252	5.79315	NA	NA	NA	NA	NA
comp2254120_c0_seq2	0.933111	3.81911	1.25237	209.753	1.48799	3.13712	NA	NA	NA	NA	NA
comp2254171_c0_seq2	5.56117	5.34584	8.73387	139.236	6.84062	10.4387	ref|XP_001631596.1| predicted protein [Nematostella vectensis] gb|EDO39533.1| predicted protein [Nematostella vectensis]	1e-75	59	71	1
comp2254290_c0_seq1	4.8525	35.2948	16.8566	4.5269	2.72703	5.42172	ref|XP_009066115.1| hypothetical protein LOTGIDRAFT_236765 [Lottia gigantea] gb|ESO83165.1| hypothetical protein LOTGIDRAFT_236765 [Lottia gigantea]	7e-33	36	56	11
comp2254291_c0_seq1	0.919887	1.3601	0.417457	60.6512	0	1.12748	NA	NA	NA	NA	NA
comp2254308_c0_seq1	147.97	153.388	1096.84	310.817	488.413	244.141	gb|ELU12369.1| hypothetical protein CAPTEDRAFT_165495 [Capitella teleta]	2e-147	64	78	1
comp2254337_c0_seq1	159.526	249.206	9.37773	566.461	157.324	76.5427	NA	NA	NA	NA	NA
comp2254339_c0_seq1	127.718	143.776	72.538	28.3254	117.956	106.927	ref|XP_013391611.1| PREDICTED: DNA replication complex GINS protein SLD5-like [Lingula anatina]	1e-83	68	86	2
comp2254414_c0_seq1	196.516	198.19	1637.13	794.861	209.936	180.675	ref|XP_011444015.1| PREDICTED: hydroxysteroid 11-beta-dehydrogenase 1-like protein [Crassostrea gigas] ref|XP_011444016.1| PREDICTED: hydroxysteroid 11-beta-dehydrogenase 1-like protein [Crassostrea g	7e-107	54	75	0
comp2254577_c0_seq3	9.39355	8.63048	29.8318	4.79859	7.15048	6.14746	emb|CAJ38818.1| putative D-amino acid oxidase [Platynereis dumerilii]	0	90	90	10
comp2254777_c1_seq1	11.8636	0.71344	4.39966	3.68114	11.2582	7.1149	NA	NA	NA	NA	NA
comp2254966_c0_seq1	1.86346	2.54718	7.60975	1185.57	2.26088	3.65674	NA	NA	NA	NA	NA
comp2255078_c0_seq3	3.67896	2.16214	99.763	3.50667	1.10006	2.43212	NA	NA	NA	NA	NA
comp2255138_c0_seq3	3.08005	4.88806	1.54158	33.0941	3.59259	5.87844	ref|XP_014299989.1| PREDICTED: uncharacterized protein LOC103571642 [Microplitis demolitor]	5e-32	26	50	6
comp2255195_c0_seq2	12.8072	23.2986	44.571	120.66	20.1428	20.1866	gb|ELU02806.1| hypothetical protein CAPTEDRAFT_227579 [Capitella teleta]	5e-10	26	49	8
comp2255240_c0_seq1	113.466	81.3786	226.258	82.6503	116.236	72.7649	NA	NA	NA	NA	NA
comp2255341_c1_seq1_contamination	32.769	45.6385	1197.36	65.4824	25.6633	68.1862	ref|XP_012365851.1| PREDICTED: rab effector MyRIP [Nomascus leucogenys]	1e-10	75	84	0
comp2255421_c0_seq4	18.9629	21.0009	44.0253	10.6879	16.4692	14.2542	ref|XP_013379494.1| PREDICTED: uncharacterized protein LOC106150985 [Lingula anatina]	3e-47	40	60	4
comp2255482_c0_seq1	8.52043	6.21489	207.412	39.1576	11.7825	11.0667	gb|ELU17915.1| hypothetical protein CAPTEDRAFT_154359 [Capitella teleta]	4e-14	34	56	3
comp2255626_c4_seq1_contamination	24.2164	36.8864	1047.18	59.6308	27.0299	39.4094	gb|AIG61123.1| NADH dehydrogenase subunit 1 (mitochondrion) [Homo sapiens]	6e-104	93	97	0
comp2255979_c2_seq1	3.74075	8.38473	18.2385	55.396	5.81296	3.70712	emb|CBN80961.1| Retrovirus polyprotein [Dicentrarchus labrax]	3e-60	52	75	1
comp2256206_c0_seq2	1.37707	1.0771	168.624	3.75838	0.55003	0.607861	NA	NA	NA	NA	NA
comp2256220_c0_seq1	364.364	568.762	137.481	492.042	428.441	444.353	ref|XP_013094649.1| PREDICTED: titin-like isoform X2 [Biomphalaria glabrata]	6e-104	43	62	1
comp2256232_c0_seq1	3.70878	6.93405	4.68755	242.492	4.04996	1.22462	NA	NA	NA	NA	NA
comp2256295_c0_seq2	10.8958	1.02795	11.0149	0.852361	7.66862	2.00964	gb|KNC97637.1| hypothetical protein SPPG_07106 [Spizellomyces punctatus DAOM BR117]	2e-71	51	67	3
comp2256337_c0_seq2	20.8411	13.7015	2023.98	766.065	23.469	11.5692	gb|ELU00569.1| hypothetical protein CAPTEDRAFT_211593 [Capitella teleta]	3e-20	28	49	6
comp2256376_c1_seq2	35.0663	34.3083	13.2932	238.364	37.1848	36.0105	NA	NA	NA	NA	NA
comp2256388_c0_seq2	5.24572	7.26199	0.77079	19.4193	6.50198	10.9481	gb|EYU42264.1| hypothetical protein MIMGU_mgv1a0213241mg, partial [Erythranthe guttata]	7e-46	33	52	7
comp2256904_c0_seq1	21.2113	21.7248	285.565	43.6979	19.0921	12.3002	ref|YP_009109685.1| replication-associated protein [Circoviridae 19 LDMD-2013] gb|AGS36235.1| replication-associated protein [Circoviridae 19 LDMD-2013]	2e-54	45	59	2
comp2257406_c0_seq1	1.07208	1.47603	0.834915	932.285	0.321343	2.96886	NA	NA	NA	NA	NA
comp2257469_c0_seq1	34.757	38.0238	41.2287	8.74483	31.786	43.0299	gb|ELU06113.1| hypothetical protein CAPTEDRAFT_212711 [Capitella teleta]	6e-110	61	76	8
comp2257612_c0_seq1	2.37691	2.47247	105.009	2.99665	4.16869	1.275	sp|P11118.2|CALM_EUGGR RecName: Full=Calmodulin; Short=CaM gb|ACH72984.1| calmodulin 1 [Euglena gracilis]	2e-36	50	63	16
comp2257617_c0_seq6	239.413	188.987	3126.09	871.719	242.006	361.875	gb|ELT97033.1| hypothetical protein CAPTEDRAFT_215676 [Capitella teleta]	2e-92	54	71	1
comp2257715_c1_seq3	514.507	433.751	12717.3	4402.31	699.684	489.348	ref|XP_013417145.1| PREDICTED: gamma-interferon-inducible lysosomal thiol reductase-like [Lingula anatina]	1e-77	53	69	1
comp2257746_c0_seq2	344.949	410.707	37.4769	144.43	397.551	435.033	NA	NA	NA	NA	NA
comp2257772_c0_seq1	0.550949	1.99705	1.6057	986.737	0	0.793913	NA	NA	NA	NA	NA
comp2257797_c0_seq1	76.8333	64.7177	34.6175	8.80868	56.0656	44.2753	NA	NA	NA	NA	NA
comp2258124_c0_seq1	3.39333	5.95944	2.72983	113.524	3.50575	1.37214	NA	NA	NA	NA	NA
comp2258124_c1_seq1	10.3162	8.93529	4.33553	404.966	13.2385	13.9993	NA	NA	NA	NA	NA
comp2258219_c0_seq1	3.68666	1.5999	100.149	3.93964	1.78908	5.08815	NA	NA	NA	NA	NA
comp2258290_c0_seq1	428.504	456.397	313.788	41.9331	272.06	322.455	gb|ADP06654.1| cyclin-dependent kinase 1 [Haliotis diversicolor supertexta]	2e-176	82	91	1
comp2258311_c0_seq2	2.75198	3.11912	3.21141	201.716	11.0584	0.94143	NA	NA	NA	NA	NA
comp2258382_c0_seq1	51.4641	59.7983	62.7782	13.5434	49.6908	41.2143	ref|XP_013410426.1| PREDICTED: DNA polymerase delta subunit 2-like [Lingula anatina]	2e-154	55	76	1
comp2258601_c0_seq1	1511.87	1482.11	2498.78	1328.27	1419.55	1592.66	ref|XP_013081568.1| PREDICTED: 26S protease regulatory subunit 10B isoform X1 [Biomphalaria glabrata]	0	94	97	0
comp2258643_c0_seq1	78.2586	79.0702	325.569	118.272	64.9965	83.7166	gb|ELU17328.1| hypothetical protein CAPTEDRAFT_219555 [Capitella teleta]	6e-58	31	54	3
comp2258775_c0_seq1	16.5221	15.6236	47.1752	174.772	16.3795	9.1578	NA	NA	NA	NA	NA
comp2258794_c0_seq1	38.9767	38.2925	268.783	53.1705	50.5571	37.1511	NA	NA	NA	NA	NA
comp2258817_c0_seq1	4.29664	5.43069	1.18825	22.8759	4.51029	6.64566	gb|KMQ85846.1| enzymatic polyprotein endonuclease reverse [Lasius niger]	5e-24	40	58	8
comp2258826_c0_seq1	34.6442	40.7994	382.118	76.8978	43.1197	53.7337	NA	NA	NA	NA	NA
comp2258842_c0_seq1	103.086	88.4484	99.6414	15.1577	65.1381	54.6597	ref|XP_002601256.1| hypothetical protein BRAFLDRAFT_127508 [Branchiostoma floridae] gb|EEN57268.1| hypothetical protein BRAFLDRAFT_127508 [Branchiostoma floridae]	1e-06	28	43	21
comp2258861_c0_seq2	96.9607	99.2169	90.1104	6.60054	339.536	251.27	ref|XP_009058764.1| hypothetical protein LOTGIDRAFT_217867 [Lottia gigantea] gb|ESO90437.1| hypothetical protein LOTGIDRAFT_217867 [Lottia gigantea]	3e-121	55	71	1
comp2258896_c0_seq1	23.9801	1.32858	2.85808	5.7282	16.1303	0.460344	NA	NA	NA	NA	NA
comp2259070_c0_seq2	1877.2	1728.71	2631.77	1207.53	2279.53	1595.05	ref|XP_002587955.1| hypothetical protein BRAFLDRAFT_87343 [Branchiostoma floridae] gb|EEN43966.1| hypothetical protein BRAFLDRAFT_87343 [Branchiostoma floridae]	6e-14	39	48	17
comp2259130_c0_seq2	105.891	2.15618	1.25237	7.20119	61.7048	2.77391	NA	NA	NA	NA	NA
comp2259156_c0_seq2	7.07779	1.47008	41.6803	4.792	11.1626	1.09784	ref|WP_004762888.1| hypothetical protein [Leptospira kirschneri] gb|EMN26279.1| leucine rich repeat protein [Leptospira kirschneri serovar Sokoine str. RM1]	1e-25	47	65	1
comp2259175_c0_seq1	21.4871	26.0119	8.79931	45.0266	14.5904	20.9841	ref|XP_011436216.1| PREDICTED: cytidine deaminase-like isoform X1 [Crassostrea gigas]	2e-45	64	75	0
comp2259229_c0_seq1	337.214	12.3275	737.086	15.0605	207.931	10.2563	ref|XP_015197324.1| PREDICTED: epididymal sperm-binding protein 1-like [Lepisosteus oculatus]	7e-28	30	41	23
comp2259310_c0_seq2	2.86883	3.58902	225.514	3.25496	4.46978	2.78281	ref|XP_002981586.1| hypothetical protein SELMODRAFT_233752 [Selaginella moellendorffii] gb|EFJ17401.1| hypothetical protein SELMODRAFT_233752 [Selaginella moellendorffii]	1e-173	60	79	2
comp2259353_c0_seq2	12.2768	10.0832	1.25237	1309.26	9.43458	24.519	NA	NA	NA	NA	NA
comp2259386_c0_seq1	274.873	342.585	287.067	126.527	337.72	295.724	ref|XP_002731966.1| PREDICTED: serum paraoxonase/arylesterase 1-like [Saccoglossus kowalevskii]	1e-70	38	57	3
comp2259400_c0_seq3	1.3743	28.4033	1.25237	2.57047	4.04414	4.86061	gb|KOF63765.1| hypothetical protein OCBIM_22018428mg, partial [Octopus bimaculoides]	2e-26	43	61	0
comp2259525_c0_seq2	270.872	255.004	200.438	68.7618	236.592	242.789	ref|XP_013395574.1| PREDICTED: chromosome transmission fidelity protein 18 homolog [Lingula anatina]	0	51	65	10
comp2259595_c0_seq1	5.64171	2.45483	51.6011	3.51346	5.8998	4.27349	gb|ELT96677.1| hypothetical protein CAPTEDRAFT_216741 [Capitella teleta]	2e-16	27	50	11
comp2259598_c0_seq4	15.0976	0.947284	12.8129	1.45301	7.45723	1.24536	ref|XP_002118597.1| hypothetical protein TRIADDRAFT_34455 [Trichoplax adhaerens] gb|EDV18916.1| hypothetical protein TRIADDRAFT_34455 [Trichoplax adhaerens]	2e-37	54	66	1
comp2259838_c0_seq2	63.7963	47.3524	47.9434	1536.81	108.73	149.358	NA	NA	NA	NA	NA
comp2259858_c0_seq2	6.77836	8.46098	507.092	90.2411	8.54581	10.3949	ref|XP_013386528.1| PREDICTED: uncharacterized protein LOC106156013 [Lingula anatina] ref|XP_013386529.1| PREDICTED: uncharacterized protein LOC106156013 [Lingula anatina] ref|XP_013386530.1| PREDICTE	1e-64	43	63	2
comp2260060_c1_seq1	39.639	54.0551	55.3608	7.10396	22.4904	32.4575	gb|ELU12824.1| hypothetical protein CAPTEDRAFT_148645 [Capitella teleta]	1e-154	76	86	0
comp2260208_c0_seq1	25530.7	20341.4	10830.5	5329.85	24965.1	14026.1	NA	NA	NA	NA	NA
comp2260225_c1_seq2	950.274	636.871	167.82	611.468	858.19	631.418	gb|ELT95610.1| hypothetical protein CAPTEDRAFT_5356 [Capitella teleta]	2e-128	56	74	1
comp2260667_c0_seq3	29.4769	31.8048	48.9393	121.962	23.7326	28.2726	ref|XP_013420924.1| PREDICTED: uncharacterized protein LOC106181165 isoform X2 [Lingula anatina]	2e-76	41	62	4
comp2260735_c0_seq2	69.5199	100.107	53.5954	13.0132	85.2524	92.4441	ref|XP_013395321.1| PREDICTED: putative hydroxypyruvate isomerase [Lingula anatina]	3e-80	53	76	2
comp2260931_c0_seq2	82.2558	30.8915	107.701	15.9965	68.916	17.847	ref|XP_013383405.1| PREDICTED: uncharacterized protein LOC106153841 isoform X3 [Lingula anatina]	2e-16	42	59	2
comp2260946_c0_seq3	7.79202	0.522793	13.3259	0	2.81673	0.303931	NA	NA	NA	NA	NA
comp2261034_c0_seq3	5.29707	11.7262	3.56474	189.337	4.86918	9.93624	NA	NA	NA	NA	NA
comp2261079_c0_seq1	2180.01	1607.56	155.649	626.429	1583.1	1111.04	NA	NA	NA	NA	NA
comp2261228_c0_seq1	94.4625	426.426	23.1865	369.961	93.1119	561.571	NA	NA	NA	NA	NA
comp2261236_c0_seq1	138.83	147.373	243.525	101.321	170.638	157.925	gb|ELU15059.1| hypothetical protein CAPTEDRAFT_170225 [Capitella teleta]	2e-58	56	72	2
comp2261322_c0_seq1	0.58016	3.4063	0.417457	148.92	0.321343	0	NA	NA	NA	NA	NA
comp2261336_c0_seq1	52.2416	52.3819	39.8194	8.44636	39.6602	36.9463	ref|XP_013389907.1| PREDICTED: HAUS augmin-like complex subunit 1 isoform X1 [Lingula anatina] ref|XP_013389908.1| PREDICTED: HAUS augmin-like complex subunit 1 isoform X2 [Lingula anatina]	6e-63	43	68	0
comp2261389_c0_seq3	6.51642	7.1939	4.68886	208.086	8.21865	11.1987	NA	NA	NA	NA	NA
comp2261404_c0_seq2	2.58535	4.44991	57.1509	2.74494	0.871374	0.793913	emb|CCA83248.1| hypothetical protein BDB_mp60414 [blood disease bacterium R229]	5e-35	66	78	0
comp2261415_c0_seq1	82.8093	96.0995	864.591	152.801	79.7371	76.8957	ref|XP_013394376.1| PREDICTED: vegetative incompatibility protein HET-E-1-like [Lingula anatina]	2e-100	46	65	2
comp2261424_c0_seq4	14.3337	127.405	18.8484	273.378	12.3873	52.0504	ref|XP_009028288.1| hypothetical protein HELRODRAFT_180744 [Helobdella robusta] gb|ESN93652.1| hypothetical protein HELRODRAFT_180744 [Helobdella robusta]	9e-11	24	42	20
comp2261460_c0_seq2	45.8601	139.639	6.9044	67.8659	54.928	98.7568	ref|XP_013384773.1| PREDICTED: lysine-specific demethylase 8-like [Lingula anatina]	6e-35	42	59	5
comp2261576_c0_seq2	6675.54	3715.27	9412.62	3163.85	3608.54	2310.07	NA	NA	NA	NA	NA
comp2261606_c0_seq1	104.289	92.1061	431.089	926.565	153.874	138.128	gb|EKC25310.1| hypothetical protein CGI_10013679 [Crassostrea gigas]	7e-21	50	62	13
comp2261615_c0_seq4	6.04264	52.2928	3.62887	7.36246	5.5582	11.0051	NA	NA	NA	NA	NA
comp2261663_c0_seq1	3.50308	58.8608	12.6506	6.91611	3.76346	13.7109	gb|ELU10872.1| hypothetical protein CAPTEDRAFT_113983 [Capitella teleta]	5e-178	54	72	5
comp2261794_c1_seq4	20.8602	0.904088	6.67932	1.2013	10.9659	0.920688	ref|XP_012567022.1| PREDICTED: heparin sulfate O-sulfotransferase-like [Hydra vulgaris]	2e-25	29	49	14
comp2261973_c0_seq3	4.54536	0.141497	15.2509	0.600649	8.24472	0.764275	ref|XP_974256.1| PREDICTED: alpha-(1,3)-fucosyltransferase C [Tribolium castaneum] gb|EFA05856.1| hypothetical protein TcasGA2_TC008651 [Tribolium castaneum]	5e-17	36	56	4
comp2262013_c0_seq1	262.64	297.232	408.418	103.496	264.923	269.485	ref|XP_012750042.1| hypothetical protein SAMD00019534_103370, partial [Acytostelium subglobosum LB1] dbj|GAM27162.1| hypothetical protein SAMD00019534_103370, partial [Acytostelium subglobosum LB1]	4e-08	35	53	2
comp2262050_c0_seq1	854.352	765.521	7453.89	1335.56	1096.67	945.008	NA	NA	NA	NA	NA
comp2262067_c0_seq1	3.00564	2.24655	30.9834	0.600649	1.19272	5.56561	gb|EJK68823.1| hypothetical protein THAOC_09967 [Thalassiosira oceanica]	4e-39	62	81	0
comp2262122_c0_seq14	24.3295	5.46398	240.989	4.02348	23.2402	7.13632	ref|XP_002407633.1| calcium-dependent cysteine protease, putative [Ixodes scapularis] gb|EEC03794.1| calcium-dependent cysteine protease, putative [Ixodes scapularis]	9e-133	38	54	7
comp2262122_c1_seq1	3.74291	0.473642	36.1892	0.600649	1.763	0.333568	gb|EFX89537.1| hypothetical protein DAPPUDRAFT_303248 [Daphnia pulex]	5e-06	31	54	9
comp2262143_c0_seq5	56.4783	51.46	103.531	32.8993	59.8203	62.6245	gb|ELT93491.1| hypothetical protein CAPTEDRAFT_123686 [Capitella teleta]	2e-31	46	68	1
comp2262204_c0_seq1	655.161	653.119	257.119	608.862	526.446	467.646	ref|XP_009059185.1| hypothetical protein LOTGIDRAFT_192210 [Lottia gigantea] gb|ESO90109.1| hypothetical protein LOTGIDRAFT_192210 [Lottia gigantea]	3e-174	61	76	0
comp2262340_c0_seq2	8.81	8.4731	277.271	3.25496	10.3985	5.12601	NA	NA	NA	NA	NA
comp2262361_c0_seq1	21.9704	2.86169	24.308	5.14093	12.3294	7.74351	NA	NA	NA	NA	NA
comp2262399_c0_seq2	29.9484	38.2575	24.4703	470.886	47.1289	43.462	NA	NA	NA	NA	NA
comp2262413_c0_seq1	2.21917	54.9718	4.27141	31.9834	7.10711	10.2313	NA	NA	NA	NA	NA
comp2262459_c0_seq3	14.4969	16.6592	21.0652	4.19794	13.8841	20.212	NA	NA	NA	NA	NA
comp2262554_c0_seq1	2.46515	1.59394	36.5058	1.54364	1.51406	3.1875	ref|WP_060052111.1| DNA methylase [Burkholderia ubonensis] gb|KVO11747.1| DNA methylase [Burkholderia ubonensis]	1e-65	68	82	0
comp2262560_c1_seq1_contamination	50.5354	58.5794	752.985	83.9327	61.4799	54.2211	ref|XP_011768580.1| PREDICTED: uncharacterized protein LOC105498282, partial [Macaca nemestrina]	3e-31	65	70	2
comp2262597_c0_seq3	106.423	123.836	89.7559	375.403	240.972	93.5846	NA	NA	NA	NA	NA
comp2262712_c0_seq1	2.83685	2.68868	34.4198	1.45301	3.23073	2.9221	ref|WP_011975496.1| histone H1 [Sinorhizobium medicae] ref|YP_001327021.1| HK97 family phage portal protein [Sinorhizobium medicae WSM419] gb|ABR60186.1| phage portal protein, HK97 family [Sinorhizobi	2e-77	53	71	2
comp2262867_c0_seq2	101.672	84.7427	323.432	125.298	89.8866	83.5481	ref|XP_013388522.1| PREDICTED: indolethylamine N-methyltransferase-like [Lingula anatina]	3e-38	37	58	2
comp2262931_c0_seq2	1353.42	8.76448	2615.29	80.5192	918.784	9.63526	gb|ELT91760.1| hypothetical protein CAPTEDRAFT_169948 [Capitella teleta]	1e-56	37	55	3
comp2262943_c0_seq1	23.2427	1.60783	3.21141	0	21.5785	2.01853	NA	NA	NA	NA	NA
comp2263011_c0_seq1	2735.62	1993.85	16051.8	4283.4	4385.11	3640.67	gb|ELU04621.1| hypothetical protein CAPTEDRAFT_222921 [Capitella teleta]	0	27	45	12
comp2263060_c0_seq1	8.60709	10.3838	30.2165	132.132	5.83903	9.78278	ref|XP_013066728.1| PREDICTED: dynein heavy chain 17, axonemal-like [Biomphalaria glabrata]	2e-69	49	70	2
comp2263066_c0_seq2	51.1666	75.1012	143.955	34.3788	49.4596	43.9404	ref|XP_009016270.1| hypothetical protein HELRODRAFT_171296 [Helobdella robusta] gb|ESO05637.1| hypothetical protein HELRODRAFT_171296 [Helobdella robusta]	7e-37	35	53	14
comp2263114_c0_seq2	4.04851	168.134	6.29325	67.9703	3.16415	52.5256	ref|XP_007234607.1| PREDICTED: versican core protein-like [Astyanax mexicanus]	1e-15	56	63	3
comp2263195_c0_seq3	3.17658	5.15542	2.08729	2057.62	2.97597	5.42172	ref|WP_016708632.1| hypothetical protein [Pseudoalteromonas haloplanktis]	9e-06	50	54	0
comp2263314_c1_seq1	193.967	182.721	20.8414	105.229	170.549	116.9	NA	NA	NA	NA	NA
comp2263345_c0_seq2	6.98465	12.3925	118.411	6.68457	8.15502	9.87764	ref|WP_050757342.1| hypothetical protein [Leptothrix cholodnii]	1e-29	56	71	2
comp2263414_c0_seq1	1261.06	1224.59	2756.36	1435.23	1260.03	1143.36	ref|XP_013395822.1| PREDICTED: uncharacterized protein LOC106162896 [Lingula anatina] ref|XP_013395902.1| PREDICTED: uncharacterized protein LOC106162896 [Lingula anatina]	1e-92	56	70	1
comp2263482_c0_seq1	43.7852	53.9257	367.465	56.785	50.5016	39.3725	gb|ELT90396.1| hypothetical protein CAPTEDRAFT_54391, partial [Capitella teleta]	4e-31	29	50	0
comp2263493_c0_seq2	12.8403	6.32508	61.6828	6.08392	9.04369	4.29424	ref|XP_002731176.1| PREDICTED: BTB/POZ domain-containing protein KCTD6-like [Saccoglossus kowalevskii]	1e-26	50	68	2
comp2263641_c1_seq2	4.00211	3.12508	7.19229	62.5744	2.31303	2.2757	NA	NA	NA	NA	NA
comp2263828_c0_seq2	102.427	128.965	1.6057	28.0036	125.251	59.076	emb|CAM91769.1| hypothetical protein [Platynereis dumerilii]	2e-25	56	63	3
comp2263928_c0_seq2	2496.88	2231.6	2889.23	1399.38	2295.13	1928.65	gb|AIZ77505.1| legumain-protease-precursor [Platynereis dumerilii]	0	99	100	0
comp2263951_c0_seq2	138.844	121.649	105.551	42.2182	196.755	154.194	ref|XP_003728540.1| PREDICTED: uncharacterized protein LOC100889051 isoform X2 [Strongylocentrotus purpuratus] ref|XP_011663161.1| PREDICTED: uncharacterized protein LOC100889051 isoform X1 [Strongylo	3e-19	36	59	2
comp2264137_c1_seq2	9.7978	63.141	7.09678	23.7785	10.3087	15.3534	ref|XP_013386885.1| PREDICTED: sodium/calcium exchanger 1-like isoform X3 [Lingula anatina]	0	47	67	6
comp2264138_c0_seq2	389.653	491.465	298.7	146.086	339.88	423.958	gb|ELU10206.1| hypothetical protein CAPTEDRAFT_21886 [Capitella teleta]	0	80	91	0
comp2264193_c0_seq2	9.8953	8.68998	863.538	41.4837	13.2587	4.15494	ref|XP_005096139.1| PREDICTED: uncharacterized protein LOC101849999 [Aplysia californica] ref|XP_012936664.1| PREDICTED: uncharacterized protein LOC101849999 [Aplysia californica]	3e-22	41	59	2
comp2264208_c0_seq1	20.9229	14.0808	31.0842	4.19794	17.8036	7.35133	ref|XP_013418772.1| PREDICTED: uncharacterized protein LOC106179605 [Lingula anatina]	6e-27	35	51	12
comp2264227_c0_seq2	26.8887	26.917	229.342	33.2985	25.2002	23.0554	gb|AFJ73458.1| 4-coumarate: coenzyme A ligase, partial [Pseudotaxus chienii]	2e-41	26	46	11
comp2264343_c0_seq3	7.03419	12.6164	6.84028	886.974	9.45769	17.8154	NA	NA	NA	NA	NA
comp2264479_c0_seq6	53.4002	64.9798	65.9935	265.959	53.6544	68.1031	gb|ELU11296.1| hypothetical protein CAPTEDRAFT_226099 [Capitella teleta]	2e-16	45	73	3
comp2264543_c0_seq5	36.3691	42.1947	10.2113	69.6174	27.4264	25.6758	NA	NA	NA	NA	NA
comp2264545_c0_seq1	1.1471	17.9418	0.77079	1.45301	0.596359	5.7813	ref|XP_014662555.1| PREDICTED: EF-hand calcium-binding domain-containing protein 9-like [Priapulus caudatus]	2e-71	64	80	1
comp2264711_c0_seq7	2.16292	54.3093	0	4.792	1.80933	3.09563	NA	NA	NA	NA	NA
comp2264745_c0_seq4	192.345	214.149	309.649	138.114	199.907	193.663	gb|ELU04306.1| hypothetical protein CAPTEDRAFT_117101 [Capitella teleta]	5e-142	49	68	1
comp2264820_c0_seq2	20.6311	22.9517	61.5297	7.94973	30.9145	30.4986	ref|XP_011445408.1| PREDICTED: protein FAM166B-like [Crassostrea gigas] gb|EKC27817.1| hypothetical protein CGI_10023942 [Crassostrea gigas]	2e-106	57	71	3
comp2264887_c0_seq4	1.96493	4.00558	1.25237	770.406	2.62856	3.87175	ref|XP_001634363.1| predicted protein [Nematostella vectensis] gb|EDO42300.1| predicted protein [Nematostella vectensis]	1e-16	26	44	10
comp2264946_c0_seq2	5.42437	39.281	22.8606	14.3121	7.50938	8.39057	ref|XP_011223174.1| PREDICTED: amyotrophic lateral sclerosis 2 chromosomal region candidate gene 11 protein [Ailuropoda melanoleuca]	1e-14	28	49	7
comp2265059_c0_seq2	193.371	196.249	637.596	263.06	228.834	232.226	ref|XP_004082888.1| PREDICTED: ethanolamine kinase 1 [Oryzias latipes]	5e-25	29	46	13
comp2265087_c0_seq2	95.6381	143.301	140.264	57.8725	84.9741	119.425	ref|XP_011449544.1| PREDICTED: histone-lysine N-methyltransferase SUV39H2-like [Crassostrea gigas] gb|EKC33333.1| Histone-lysine N-methyltransferase SUV39H2 [Crassostrea gigas]	0	47	63	10
comp2265108_c0_seq2	11.0943	8.01136	59.5328	10.1142	14.1794	5.10527	ref|XP_002940521.1| PREDICTED: pentafunctional AROM polypeptide 1-like [Xenopus tropicalis] ref|XP_004914210.1| PREDICTED: pentafunctional AROM polypeptide 1-like [Xenopus tropicalis]	1e-86	52	70	4
comp2265181_c0_seq1	1896.8	2359.37	249.127	600.172	2303.61	2757.72	ref|XP_009167950.1| hypothetical protein T265_04840 [Opisthorchis viverrini] gb|KER28311.1| hypothetical protein T265_04840 [Opisthorchis viverrini]	5e-07	66	76	0
comp2265234_c1_seq1	6.11983	13.688	7.89896	7909.68	12.1933	13.8992	NA	NA	NA	NA	NA
comp2265254_c0_seq1	833.19	630.648	1221.5	54.7349	524.658	485.19	ref|XP_011430805.1| PREDICTED: importin subunit alpha-5-like [Crassostrea gigas]	0	63	79	1
comp2265381_c0_seq1	143.042	146.573	440.723	152.368	173.139	145.174	NA	NA	NA	NA	NA
comp2265586_c0_seq1	42.2573	35.3468	82.4313	22.6811	34.0964	39.2764	gb|KOF63765.1| hypothetical protein OCBIM_22018428mg, partial [Octopus bimaculoides]	7e-27	41	62	0
comp2265682_c0_seq1	22.7986	8.37284	247.006	15.6811	16.608	12.4016	ref|XP_011454575.1| PREDICTED: homeobox protein Hox-A2-like [Crassostrea gigas] gb|EKC18054.1| Homeobox protein ceh-37 [Crassostrea gigas]	4e-31	52	63	21
comp2265751_c0_seq4	29.7307	4.95286	1594.69	2037	16.333	7.3892	NA	NA	NA	NA	NA
comp2265777_c0_seq1	39.555	49.7432	12.6519	60.5901	32.5014	53.404	NA	NA	NA	NA	NA
comp2265813_c0_seq2	9.26779	5.68812	1.66983	96.2154	7.75546	3.86286	NA	NA	NA	NA	NA
comp2265890_c0_seq1	5.18947	38.4787	8.38054	9.25504	3.73444	10.7219	ref|XP_015194903.1| PREDICTED: transmembrane protease serine 9-like [Lepisosteus oculatus]	1e-70	33	50	11
comp2265947_c0_seq1	1298.69	1132.75	1633.4	840.924	1211.79	1381.93	ref|XP_013389043.1| PREDICTED: proteasome subunit alpha type-7-like [Lingula anatina]	2e-144	88	95	0
comp2266053_c0_seq1	97.0696	104.178	93.3782	26.7113	84.5719	111.209	ref|XP_013384715.1| PREDICTED: aladin-like [Lingula anatina]	0	57	73	1
comp2266084_c0_seq1	49.8997	7.25473	39.8494	10.8691	55.287	9.90956	ref|XP_013868639.1| PREDICTED: RNA-directed DNA polymerase from mobile element jockey-like [Austrofundulus limnaeus]	8e-149	48	66	0
comp2266159_c0_seq6	3.37951	60.0207	3.62887	2.90602	1.85566	10.2023	NA	NA	NA	NA	NA
comp2266255_c0_seq1	3.15783	2.12269	50.6326	1.62748	1.69642	1.25426	gb|EKD30081.1| hypothetical protein ACD_78C00161G0001 [uncultured bacterium (gcode 4)]	2e-177	66	79	0
comp2266263_c0_seq1	65.1585	54.8154	39.275	243.003	43.7684	29.6974	emb|CDR19044.1| unnamed protein product [Oncorhynchus mykiss]	1e-21	32	47	10
comp2266360_c0_seq2	61.1621	63.0852	335.365	140.566	62.5444	83.8717	gb|AEI70675.1| GST-omega [Perinereis nuntia]	4e-55	63	79	1
comp2266367_c0_seq1	20.309	25.4233	32.5276	1.45301	14.4833	21.4023	ref|XP_013412365.1| PREDICTED: protein MIS12 homolog [Lingula anatina]	5e-26	31	61	0
comp2266421_c1_seq2	13.8274	65.6749	6.71203	8.38929	11.6317	26.7553	ref|XP_012580387.1| PREDICTED: protocadherin Fat 1 [Condylura cristata]	9e-13	37	47	5
comp2266698_c0_seq2	13.0162	21.7754	19.2671	1.62748	10.167	8.56245	ref|XP_002586720.1| hypothetical protein BRAFLDRAFT_121706 [Branchiostoma floridae] gb|EEN42731.1| hypothetical protein BRAFLDRAFT_121706 [Branchiostoma floridae]	4e-07	28	46	6
comp2266754_c1_seq3	425.813	118.241	435.47	225.496	331.809	98.8694	NA	NA	NA	NA	NA
comp2266755_c0_seq1	2396.68	2080.83	1635.94	777.076	2102.96	2500.56	emb|CCK33034.1| RNA-binding protein SmB [Platynereis dumerilii]	7e-66	100	100	0
comp2266791_c0_seq6	3.57197	5.62113	7.96308	123.058	2.30721	4.88136	gb|ABV22436.1| cysteine proteinase [Oxyrrhis marina]	0	94	98	0
comp2266844_c0_seq4	829.847	656.924	3229.32	913.986	581.106	563.867	ref|XP_002609288.1| hypothetical protein BRAFLDRAFT_86801 [Branchiostoma floridae] gb|EEN65298.1| hypothetical protein BRAFLDRAFT_86801 [Branchiostoma floridae]	2e-49	37	52	15
comp2266918_c0_seq2	13.1745	4.6778	117.596	2.57047	11.652	5.21492	ref|XP_013384755.1| PREDICTED: TNF receptor-associated factor 6-like [Lingula anatina]	2e-118	44	62	2
comp2266941_c0_seq2	7.99217	12.2036	112.889	7.62077	6.90154	9.94876	NA	NA	NA	NA	NA
comp2266986_c0_seq3	234.601	326.787	3.14728	55.1178	198.535	244.271	NA	NA	NA	NA	NA
comp2267040_c0_seq2	952.55	161.159	1468.43	65.094	531.022	122.8	emb|CCI61375.1| CyclinB protein 1, partial [Platynereis dumerilii]	0	97	99	0
comp2267077_c0_seq2	933.368	1319.91	100.353	240.694	1276.56	1271.28	NA	NA	NA	NA	NA
comp2267127_c0_seq1	768.825	223.652	1247.13	64.6469	433.115	119.847	ref|XP_002736731.1| PREDICTED: nmrA-like family domain-containing protein 1-like [Saccoglossus kowalevskii]	2e-87	47	64	1
comp2267160_c0_seq2	10.0961	16.7419	14.9957	251.559	12.6884	12.8116	NA	NA	NA	NA	NA
comp2267209_c0_seq1	768.593	1127.09	360.024	1115.98	821.717	906.012	ref|XP_013419367.1| PREDICTED: titin-like isoform X4 [Lingula anatina]	0	39	58	5
comp2267246_c0_seq1	9.01785	12.0306	8.73387	0	4.04996	7.6849	ref|XP_013379845.1| PREDICTED: E3 ubiquitin-protein ligase TRAIP-like [Lingula anatina] ref|XP_013379846.1| PREDICTED: E3 ubiquitin-protein ligase TRAIP-like [Lingula anatina]	6e-32	35	57	8
comp2267256_c0_seq2	2.89804	22.4309	4.94536	5.55373	4.27865	9.74197	ref|XP_013401844.1| PREDICTED: retinal homeobox protein Rax-like [Lingula anatina]	3e-05	32	56	4
comp2267287_c0_seq12	2.31511	2.5355	43.8591	2.74494	1.53431	2.14531	ref|WP_056875934.1| hypothetical protein [Pelomonas sp. Root1444] gb|KQY83646.1| hypothetical protein ASD35_24285 [Pelomonas sp. Root1444]	8e-13	40	55	0
comp2267297_c0_seq4	8.04724	8.08015	95.9691	7.4463	4.24109	4.34099	ref|WP_024538357.1| hypothetical protein [Comamonas badia]	2e-10	48	60	5
comp2267365_c0_seq1	5.70844	60.6473	15.5728	5.0503	4.92133	7.98061	ref|XP_014672517.1| PREDICTED: receptor-type guanylate cyclase gcy-1-like [Priapulus caudatus]	5e-135	33	52	11
comp2267375_c0_seq3	67.1878	82.8911	171.42	514.315	72.1675	69.9498	ref|XP_013415114.1| PREDICTED: echinoderm microtubule-associated protein-like 4 isoform X1 [Lingula anatina]	3e-67	43	63	7
comp2267420_c0_seq2	12.7411	275.132	22.3516	216.676	13.968	87.6072	ref|XP_009065479.1| hypothetical protein LOTGIDRAFT_236403 [Lottia gigantea] gb|ESO83906.1| hypothetical protein LOTGIDRAFT_236403 [Lottia gigantea]	4e-35	29	56	1
comp2267488_c0_seq1	19.9397	0.904088	16.0858	4.02348	11.044	0.303931	gb|ELT98190.1| hypothetical protein CAPTEDRAFT_212399 [Capitella teleta]	5e-78	39	53	7
comp2267530_c0_seq1	417.178	398.043	550.357	360.341	435.779	415.596	ref|XP_011445552.1| PREDICTED: target of rapamycin complex 2 subunit MAPKAP1-like [Crassostrea gigas]	8e-173	54	72	4
comp2267587_c1_seq3	6.91672	5.94555	132.056	16.2752	8.94817	5.56923	NA	NA	NA	NA	NA
comp2267649_c0_seq1	29.6352	47.6679	72.8233	10.3523	26.1785	33.7207	ref|XP_013416663.1| PREDICTED: chromatin assembly factor 1 subunit B-like [Lingula anatina]	0	62	77	4
comp2267649_c1_seq1	66.9674	70.823	62.0375	16.1644	53.0059	52.4702	NA	NA	NA	NA	NA
comp2267686_c0_seq1	248.286	233.627	648.195	210.032	236.731	237.281	NA	NA	NA	NA	NA
comp2267783_c2_seq1	459.558	380.808	728.069	2033.44	539.459	353.259	gb|AEI70680.1| microsomal GST 2 [Perinereis nuntia]	3e-63	67	80	1
comp2267836_c0_seq1	92.0225	87.3212	115.537	29.805	89.887	71.0469	NA	NA	NA	NA	NA
comp2267850_c0_seq1	21.8121	14.729	6.77615	329.264	17.5576	22.2312	NA	NA	NA	NA	NA
comp2267870_c0_seq2	22.3738	218.684	29.1906	99.9264	19.8273	46.3742	ref|XP_002734200.1| PREDICTED: WD repeat-containing protein on Y chromosome-like [Saccoglossus kowalevskii]	0	33	54	6
comp2267939_c0_seq1	42.0847	4.74261	169.642	7.03351	20.988	4.88136	NA	NA	NA	NA	NA
comp2267940_c1_seq3	18.0717	933.362	26.1375	26.8087	20.2469	151.934	sp|P06894.1|H1A_PLADU RecName: Full=Histone H1A, sperm	6e-31	87	92	7
comp2268029_c2_seq11	482.118	480.848	950.993	4769.05	437.938	715.111	gb|KFM60178.1| putative uncharacterized oxidoreductase, partial [Stegodyphus mimosarum]	4e-95	51	69	0
comp2268100_c0_seq1	0.459944	2.56107	0.417457	510.394	0.275015	3.21351	NA	NA	NA	NA	NA
comp2268154_c0_seq1	7.64909	103.139	5.78028	8.73823	7.94363	13.1748	ref|XP_011664573.1| PREDICTED: meiotic recombination protein REC8 homolog, partial [Strongylocentrotus purpuratus]	9e-21	46	63	6
comp2268232_c0_seq1	57.545	62.5082	68.7822	7.87908	38.1085	54.8987	ref|XP_013386093.1| PREDICTED: LOW QUALITY PROTEIN: DNA primase small subunit-like [Lingula anatina]	0	68	82	1
comp2268263_c2_seq3	4.78916	3.74815	74.3281	3.42283	1.74275	3.74498	ref|WP_047789446.1| hypothetical protein [Tenacibaculum mesophilum]	2e-57	63	75	4
comp2268295_c0_seq2	13.7044	11.5217	164.842	20.5569	18.9444	14.0415	gb|AHA86920.1| gp1 [Carascovirus SF1]	1e-112	35	49	6
comp2268323_c0_seq1	6.31072	496.793	2.72983	53.4769	6.48754	56.0562	NA	NA	NA	NA	NA
comp2268383_c0_seq1	8.14377	11.9444	135.96	33.3384	23.9034	6.35063	NA	NA	NA	NA	NA
comp2268475_c0_seq2	30.869	27.2176	34.874	11.1274	22.5513	29.8976	gb|ELU04233.1| hypothetical protein CAPTEDRAFT_149748 [Capitella teleta]	5e-149	52	72	0
comp2268497_c0_seq1	376.94	341.461	293.715	133.617	414.635	364.976	ref|XP_006037536.1| PREDICTED: methylosome subunit pICln [Alligator sinensis] ref|XP_006272502.1| PREDICTED: methylosome subunit pICln [Alligator mississippiensis] gb|KQL69059.1| chloride channel, nuc	1e-53	45	61	15
comp2268551_c0_seq2	3.57534	36.8934	2.85808	3.34558	2.90939	12.424	ref|XP_014667571.1| PREDICTED: cation channel sperm-associated protein 2-like isoform X1 [Priapulus caudatus]	4e-125	42	61	13
comp2268577_c0_seq9	489.886	571.892	595.302	118.779	795.255	544.654	ref|XP_002604581.1| hypothetical protein BRAFLDRAFT_92803 [Branchiostoma floridae] gb|EEN60592.1| hypothetical protein BRAFLDRAFT_92803 [Branchiostoma floridae]	2e-107	49	63	1
comp2268738_c0_seq1	53.4318	119.434	166.676	867.53	36.8869	108.998	ref|XP_013402010.1| PREDICTED: tripartite motif-containing protein 3-like [Lingula anatina]	6e-42	23	44	9
comp2268843_c0_seq1	14.8647	8.09182	103.194	11.2887	12.9633	7.90059	ref|XP_009858780.1| PREDICTED: sushi, von Willebrand factor type A, EGF and pentraxin domain-containing protein 1-like [Ciona intestinalis]	5e-06	28	41	10
comp2268977_c0_seq1	424.227	507.774	692.883	1302.75	423.993	499.787	gb|ELT95991.1| hypothetical protein CAPTEDRAFT_223245 [Capitella teleta]	5e-63	55	74	2
comp2268991_c0_seq1	54.1911	2.13062	29.6355	0	29.5222	2.17494	NA	NA	NA	NA	NA
comp2269064_c0_seq7	94.8158	121.457	935.866	277.325	118.752	136.354	ref|XP_013776327.1| PREDICTED: glucose transporter type 1-like, partial [Limulus polyphemus]	4e-156	54	71	0
comp2269107_c0_seq1	54.4669	2.5787	36.6681	7.11075	36.2268	2.95996	NA	NA	NA	NA	NA
comp2269168_c0_seq1	2.5291	32.6185	5.93992	6.5101	2.93546	5.3506	gb|KOC64552.1| Heat shock factor protein 2 [Habropoda laboriosa]	2e-27	49	67	4
comp2269225_c0_seq5	67.8563	73.0262	390.616	146.623	79.5059	74.2792	ref|XP_013422131.1| PREDICTED: uncharacterized protein LOC106182053 [Lingula anatina]	8e-24	30	53	5
comp2269263_c0_seq2	242.877	245.001	170.932	478.273	199.98	230.556	ref|XP_013415985.1| PREDICTED: centrosomal protein of 83 kDa-like [Lingula anatina]	7e-166	47	72	0
comp2269324_c0_seq1	2236.78	2047.56	4992.67	2680.56	2247.82	2333.43	ref|XP_013786272.1| PREDICTED: 26S proteasome non-ATPase regulatory subunit 4-like [Limulus polyphemus]	5e-159	66	79	8
comp2269406_c0_seq1	1.02412	23.6563	3.14728	1.80195	3.3812	3.54708	NA	NA	NA	NA	NA
comp2269443_c0_seq1	25.2936	1.23623	0.834915	1.45301	22.7799	2.90069	ref|WP_019679908.1| hypothetical protein [Ruminococcus flavefaciens]	2e-15	39	50	19
comp2269458_c0_seq2	33.0947	26.1469	347.103	50.426	55.4202	42.0506	ref|XP_013401626.1| PREDICTED: peroxidasin homolog isoform X2 [Lingula anatina]	0	49	64	2
comp2269538_c0_seq1	20.2441	527.295	17.6955	107.517	21.3153	94.4975	NA	NA	NA	NA	NA
comp2269552_c0_seq1	2768.79	2055.8	2713.28	5926.35	2676.68	3067.31	ref|XP_013414685.1| PREDICTED: carbonic anhydrase 2-like [Lingula anatina]	7e-76	44	62	2
comp2269571_c0_seq2	3.99441	40.463	2.08729	14.7451	2.54172	11.7398	ref|XP_014677169.1| PREDICTED: ubiquitin-like-specific protease 1 [Priapulus caudatus]	1e-09	32	49	10
comp2269616_c0_seq2	4.74829	3.07593	137.545	1.45301	1.51406	5.57451	ref|WP_008196890.1| hypothetical protein [Labrenzia alexandrii] gb|EEE47704.1| hypothetical protein SADFL11_4993 [Labrenzia alexandrii DFL-11]	1e-06	29	54	11
comp2269662_c0_seq8	186.055	222.34	45555.9	103513	180.84	153.843	dbj|BAK20401.1| endo-b-1,4-glucanase [Perinereis brevicirris]	1e-170	63	75	0
comp2269799_c0_seq4	726.924	702.789	392.762	1552.07	1013.81	394.25	NA	NA	NA	NA	NA
comp2269823_c0_seq1	82.2719	95.4168	103.499	362.249	95.034	104.622	ref|XP_011448877.1| PREDICTED: testis-expressed sequence 33 protein-like isoform X2 [Crassostrea gigas]	8e-36	40	56	5
comp2269871_c0_seq1	8176.78	39.9409	558.209	50.8588	3704.82	55.3943	gb|ELU05671.1| hypothetical protein CAPTEDRAFT_229021 [Capitella teleta]	1e-53	34	54	5
comp2269922_c0_seq1	4.17425	10.49	1.6057	260.133	8.45029	4.18458	NA	NA	NA	NA	NA
comp2269946_c0_seq1	348.739	383.52	375.477	183.63	355.578	379.19	ref|XP_011445722.1| PREDICTED: protein C12orf4 homolog [Crassostrea gigas] ref|XP_011445723.1| PREDICTED: protein C12orf4 homolog [Crassostrea gigas] ref|XP_011445725.1| PREDICTED: protein C12orf4 hom	0	60	80	0
comp2270003_c0_seq1	31.4729	31.8526	1845.73	402.559	55.1394	63.7292	ref|XP_006506198.1| PREDICTED: uncharacterized protein LOC243753 isoform X2 [Mus musculus]	7e-62	41	59	1
comp2270003_c1_seq1	17.2529	17.6328	806.297	193.264	30.7149	53.139	ref|XP_006815228.1| PREDICTED: solute carrier family 23 member 1-like [Saccoglossus kowalevskii]	7e-61	40	59	5
comp2270043_c0_seq2	40.0897	69.323	2.37649	23.8119	58.9374	76.5576	ref|XP_005297810.1| PREDICTED: guanine deaminase isoform X1 [Chrysemys picta bellii]	6e-51	29	51	17
comp2270178_c0_seq4	2526.02	626.741	1594.23	461.769	1528.68	842.65	ref|XP_013403030.1| PREDICTED: tyrosine-protein kinase BAZ1B-like [Lingula anatina]	2e-66	49	64	9
comp2270224_c0_seq1	416.031	505.499	92.288	185.147	408.978	568.3	ref|XP_013420852.1| PREDICTED: uncharacterized protein LOC106181113 isoform X1 [Lingula anatina]	2e-79	44	62	5
comp2270290_c0_seq3	68.7272	95.4248	72.9594	651.219	76.8944	70.1174	gb|EKC40904.1| hypothetical protein CGI_10028621 [Crassostrea gigas]	1e-24	45	73	1
comp2270350_c0_seq2	33.3399	33.4179	66.1192	14.2079	29.3542	32.8092	NA	NA	NA	NA	NA
comp2270416_c1_seq1_contamination	39.0521	52.9918	528.004	51.2917	42.5698	43.9026	ref|XP_728215.1| hypothetical protein [Plasmodium yoelii yoelii 17XNL] gb|EAA19780.1| hypothetical protein [Plasmodium yoelii yoelii]	7e-61	85	86	10
comp2270447_c0_seq2	5.30968	19.2516	16.3122	213.579	5.289	13.8554	gb|KIK66854.1| hypothetical protein GYMLUDRAFT_218271 [Gymnopus luxurians FD-317 M1]	9e-78	38	60	4
comp2270507_c0_seq1	36.7361	36.608	106.128	31.5437	32.0236	55.3173	gb|ELU17411.1| hypothetical protein CAPTEDRAFT_225743 [Capitella teleta]	4e-150	62	79	2
comp2270548_c0_seq3	314.421	268.294	307.813	878.417	307.54	314.086	ref|XP_013381345.1| PREDICTED: DNA/RNA-binding protein KIN17-like [Lingula anatina]	6e-175	70	83	2
comp2270579_c3_seq6	39.6326	41.062	16.2167	30.7414	21.0111	170.435	ref|XP_011418299.1| PREDICTED: UDP-glucose 4-epimerase-like [Crassostrea gigas] ref|XP_011418300.1| PREDICTED: UDP-glucose 4-epimerase-like [Crassostrea gigas] gb|EKC33890.1| UDP-glucose 4-epimerase [	2e-162	65	79	0
comp2270590_c0_seq1	224.349	221.483	180.621	69.7178	192.569	186.301	ref|XP_006879764.1| PREDICTED: nucleoporin NDC1 isoform X1 [Elephantulus edwardii]	1e-66	31	49	13
comp2270639_c0_seq2	4.77474	107.131	6.77483	20.745	4.04996	24.6709	ref|XP_014251864.1| PREDICTED: cadherin-related tumor suppressor [Cimex lectularius]	2e-16	29	42	19
comp2270717_c0_seq1	13.3498	66.011	18.5605	18.9295	17.9426	23.5003	ref|XP_009051111.1| hypothetical protein LOTGIDRAFT_159233 [Lottia gigantea] gb|ESO98425.1| hypothetical protein LOTGIDRAFT_159233 [Lottia gigantea]	3e-20	45	59	6
comp2270743_c0_seq1	135.728	144.012	361.871	165.546	169.916	207.826	ref|XP_009045553.1| hypothetical protein LOTGIDRAFT_203426 [Lottia gigantea] gb|ESP04071.1| hypothetical protein LOTGIDRAFT_203426 [Lottia gigantea]	6e-146	54	70	3
comp2270769_c1_seq1	115.643	101.485	39.114	211.311	62.8977	56.1724	ref|XP_013417341.1| PREDICTED: uncharacterized protein LOC106178593 isoform X3 [Lingula anatina]	7e-53	38	60	5
comp2270871_c0_seq1	1095.41	968.892	21.3217	82.5066	1130.14	759.856	NA	NA	NA	NA	NA
comp2270884_c0_seq1	105.124	117.91	3.14728	26.9163	89.4437	93.5439	NA	NA	NA	NA	NA
comp2270896_c0_seq2	85.5534	105.301	92.2894	33.0202	63.0424	91.0387	ref|XP_011430390.1| PREDICTED: DNA replication factor Cdt1-like isoform X1 [Crassostrea gigas] ref|XP_011430391.1| PREDICTED: DNA replication factor Cdt1-like isoform X2 [Crassostrea gigas]	1e-128	46	67	12
comp2270981_c1_seq5	2.48114	1.0771	21.9329	1.27854	1.99169	2.25496	NA	NA	NA	NA	NA
comp2270985_c1_seq1	2591.11	2496.65	314.296	2235.4	4136.77	3317.72	ref|XP_010012269.1| PREDICTED: LOW QUALITY PROTEIN: type I iodothyronine deiodinase [Nestor notabilis]	7e-39	41	59	4
comp2271063_c0_seq8	21.9608	0.953238	20.1649	0.852361	15.7684	4.7042	ref|XP_013415038.1| PREDICTED: uncharacterized protein LOC106176979 isoform X3 [Lingula anatina]	2e-27	31	45	7
comp2271221_c0_seq2	100.329	109.263	100.411	688.903	82.4353	97.9718	ref|XP_009056742.1| hypothetical protein LOTGIDRAFT_120571, partial [Lottia gigantea] gb|ESO92601.1| hypothetical protein LOTGIDRAFT_120571, partial [Lottia gigantea]	4e-40	52	70	3
comp2271245_c0_seq10	13817.6	14262.6	9753.94	7842.46	28874.2	5407.42	NA	NA	NA	NA	NA
comp2271267_c1_seq4	1778.92	1567.21	1754.03	856.956	1804.14	1644.07	ref|XP_013419280.1| PREDICTED: replication protein A 70 kDa DNA-binding subunit-like isoform X2 [Lingula anatina]	6e-175	53	73	2
comp2271279_c0_seq2	129.587	137.344	202.075	604.184	104.266	100.579	ref|XP_013413830.1| PREDICTED: NAD-dependent protein deacetylase sirtuin-3-like [Lingula anatina]	1e-149	61	76	3
comp2271325_c1_seq2	9.21526	9.27316	62.6211	15.3388	5.1442	7.78204	gb|ELT99235.1| hypothetical protein CAPTEDRAFT_224300 [Capitella teleta]	4e-32	41	57	6
comp2271384_c0_seq4	392.24	331.163	988.125	496.563	387.195	321.197	gb|ELT90649.1| hypothetical protein CAPTEDRAFT_220999 [Capitella teleta]	0	58	77	0
comp2271425_c0_seq4	4252.61	3634.16	3867.71	2426.85	3884.25	3546.18	tpg|DAA34416.1| TPA_inf: alternative splicing factor ASF/SF2 [Amblyomma variegatum]	1e-82	80	85	5
comp2271544_c0_seq1	364.193	238.464	606.216	67.0466	410.438	408.233	gb|ADN44543.1| cytochrome P450 CYP46A1 [Perinereis nuntia]	2e-55	52	74	0
comp2271654_c0_seq4	1118.14	1150.82	1685.37	837.374	1284.3	1316.13	ref|XP_011441085.1| PREDICTED: 26S protease regulatory subunit 6B isoform X1 [Crassostrea gigas] gb|EKC24481.1| 26S protease regulatory subunit 6B [Crassostrea gigas]	0	92	95	0
comp2271698_c0_seq2	222.681	233.196	83.4939	336.191	236.948	260.325	NA	NA	NA	NA	NA
comp2271737_c1_seq2	1554.38	2865.39	181.243	725.897	1101.1	1933.8	NA	NA	NA	NA	NA
comp2271738_c0_seq4	5.05604	5.94157	2.02316	141.072	4.68683	8.55521	NA	NA	NA	NA	NA
comp2272046_c0_seq8	113.862	219.744	181.747	30.6242	98.3313	126.408	ref|XP_013781688.1| PREDICTED: histone RNA hairpin-binding protein-like [Limulus polyphemus]	3e-17	65	79	0
comp2272055_c0_seq3	120.554	154.046	119.327	43.3925	87.6204	105.345	ref|XP_011419387.1| PREDICTED: DNA polymerase delta catalytic subunit-like [Crassostrea gigas]	0	82	91	0
comp2272087_c1_seq4	784.461	1009.01	814.317	264.575	1015.74	617.951	ref|XP_009016114.1| hypothetical protein HELRODRAFT_77319 [Helobdella robusta] gb|ESO05481.1| hypothetical protein HELRODRAFT_77319 [Helobdella robusta]	1e-23	42	63	1
comp2272151_c0_seq6	5.7189	22.8613	3.56474	9.59059	5.49162	7.38097	NA	NA	NA	NA	NA
comp2272191_c0_seq3	11.5091	6.38172	41.7771	7.02012	12.0572	4.39137	gb|ELU17266.1| hypothetical protein CAPTEDRAFT_192844 [Capitella teleta]	4e-97	42	62	1
comp2272270_c0_seq1	15.5128	15.8257	244.28	16.4562	20.9737	21.9233	ref|XP_002114172.1| hypothetical protein TRIADDRAFT_58361 [Trichoplax adhaerens] gb|EDV23262.1| hypothetical protein TRIADDRAFT_58361 [Trichoplax adhaerens]	1e-133	43	61	10
comp2272293_c0_seq1	1673.39	1485.54	1455.44	863.926	1608.89	1420.95	gb|ELU18801.1| hypothetical protein CAPTEDRAFT_226733 [Capitella teleta]	0	61	76	2
comp2272365_c0_seq2	255.99	224.62	876.759	104.624	376.434	253.525	ref|XP_013385884.1| PREDICTED: alcohol dehydrogenase-like [Lingula anatina]	1e-59	38	55	5
comp2272373_c0_seq1	5.64726	5.91205	81.5217	9.59719	7.12441	5.18529	gb|KDN14036.1| Phage terminase large subunit [Snodgrassella alvi]	0	71	84	0
comp2272384_c0_seq1	160.624	20.6999	97.1077	45.4764	120.171	16.7515	ref|XP_013420472.1| PREDICTED: WD repeat-containing protein on Y chromosome-like isoform X1 [Lingula anatina]	0	42	58	7
comp2272428_c0_seq1	706.784	642.57	1165.23	3290.28	769.155	593.174	NA	NA	NA	NA	NA
comp2272437_c1_seq1	12983.5	23606	1059.44	3371.79	8720.96	19781.6	NA	NA	NA	NA	NA
comp2272443_c0_seq5	51.3374	16.3445	163.38	10.953	37.509	19.7358	gb|ELT91350.1| hypothetical protein CAPTEDRAFT_118515 [Capitella teleta]	6e-147	75	87	5
comp2272490_c0_seq11	181.815	73.2997	160.808	19.5233	93.2241	39.476	gb|KOF70359.1| hypothetical protein OCBIM_22002998mg, partial [Octopus bimaculoides]	6e-62	26	44	9
comp2272494_c0_seq1	253.313	245.364	80.0235	193.104	248.583	256.388	NA	NA	NA	NA	NA
comp2272523_c0_seq2	300.147	249.113	139.208	68.1779	242.283	194.338	ref|XP_014782686.1| PREDICTED: sulfotransferase 1C4-like [Octopus bimaculoides] gb|KOF74039.1| hypothetical protein OCBIM_22036916mg [Octopus bimaculoides]	5e-66	39	63	0
comp2272645_c0_seq1	1756.77	2036.71	68.2967	233.548	2435.68	1712.32	gb|ELU10131.1| hypothetical protein CAPTEDRAFT_219486 [Capitella teleta]	2e-20	38	59	3
comp2272663_c0_seq3	2.9995	27.8373	6.29325	4.5335	3.59259	10.2995	NA	NA	NA	NA	NA
comp2272740_c0_seq1	6.00789	46.9203	13.8389	8.73823	7.5904	15.0748	ref|XP_002733692.2| PREDICTED: atrial natriuretic peptide receptor 1-like [Saccoglossus kowalevskii]	1e-154	32	53	6
comp2272758_c0_seq3	4.82329	51.4939	14.8976	22.6176	4.4032	17.0607	NA	NA	NA	NA	NA
comp2272851_c0_seq1	37.683	28.7306	99.1637	33.1574	50.9156	49.8412	gb|ELU15121.1| hypothetical protein CAPTEDRAFT_53190, partial [Capitella teleta]	8e-18	53	73	3
comp2272898_c0_seq2	453.944	624.655	238.537	700.15	467.383	465.858	gb|ELU04159.1| hypothetical protein CAPTEDRAFT_93612 [Capitella teleta]	2e-163	53	70	6
comp2273016_c0_seq4	21273.6	128.239	1910.7	138.529	11239.9	212.743	gb|ELU11155.1| hypothetical protein CAPTEDRAFT_224256 [Capitella teleta]	5e-94	39	58	4
comp2273029_c0_seq1	474.684	277.758	444.308	49.923	299.484	224.883	gb|ACH87545.1| cyclin A [Platynereis dumerilii] gb|ACH87549.1| cyclin A [Platynereis dumerilii]	0	99	99	0
comp2273079_c2_seq2	165.732	144.525	598.217	527.722	406.679	74.0655	NA	NA	NA	NA	NA
comp2273132_c0_seq2	13.4381	14.8178	128.575	34.2682	15.4762	15.8094	ref|XP_013405316.1| PREDICTED: low-density lipoprotein receptor-related protein 4-like [Lingula anatina]	2e-18	27	47	7
comp2273152_c0_seq2	863.508	770.646	4699.59	2423.33	834.321	757.085	gb|ELT90648.1| hypothetical protein CAPTEDRAFT_151660 [Capitella teleta]	5e-151	60	73	10
comp2273155_c0_seq6	135.424	146.047	168.486	67.8113	136.776	131.046	gb|ELU08281.1| hypothetical protein CAPTEDRAFT_96409 [Capitella teleta]	4e-110	43	62	9
comp2273167_c0_seq1	12.1123	20.6117	0	7.87248	19.7634	11.8056	NA	NA	NA	NA	NA
comp2273222_c0_seq2	983.471	1298.72	79.7643	268.323	1173.2	1309.02	gb|ELU08571.1| hypothetical protein CAPTEDRAFT_211232 [Capitella teleta]	0	78	88	1
comp2273377_c0_seq2	21.0692	2.47247	12.7802	2.99665	18.8659	2.86282	gb|ELU06094.1| hypothetical protein CAPTEDRAFT_137191 [Capitella teleta]	1e-120	40	61	1
comp2273450_c0_seq2	263.509	250.752	340.287	159.614	219.959	177.008	tpg|DAA63647.1| TPA: putative RNA helicase family protein [Zea mays]	3e-32	29	47	7
comp2273484_c0_seq3	510.948	611.199	364.085	189.16	422.74	572.287	gb|ELU04176.1| hypothetical protein CAPTEDRAFT_226670 [Capitella teleta]	0	48	66	5
comp2273492_c0_seq13	121.5	65.7262	470.142	22.9528	107.318	55.4391	ref|XP_014785502.1| PREDICTED: uncharacterized protein LOC106880171 [Octopus bimaculoides] gb|KOF70114.1| hypothetical protein OCBIM_22003461mg [Octopus bimaculoides]	3e-10	30	53	6
comp2273515_c0_seq1	150.779	130.125	45.2423	89.4123	164.57	223.794	ref|NP_001265728.1| laminin subunit alpha-2 precursor [Danio rerio] gb|AER12035.1| laminin alpha 2 chain short splice variant [Danio rerio]	9e-07	24	44	16
comp2273524_c0_seq9	69.2362	78.3176	74.6907	18.2448	78.0905	70.8623	ref|NP_001265890.1| neuronal acetylcholine receptor subunit alpha-7-like precursor [Ciona intestinalis] dbj|BAJ65320.1| nicotinic acetylcholine receptor subunit [Ciona intestinalis]	8e-44	35	57	0
comp2273538_c1_seq1	43.4834	29.1047	85.7303	6.16097	49.1878	42.3117	ref|XP_013072732.1| PREDICTED: uncharacterized protein LOC106059609 [Biomphalaria glabrata]	6e-06	31	54	4
comp2273644_c0_seq2	637.069	668.647	962.256	565.347	650.76	606.32	ref|XP_013394641.1| PREDICTED: transcriptional repressor NF-X1-like isoform X2 [Lingula anatina]	0	52	67	3
comp2273646_c2_seq2	417.742	1253.4	274.783	946.672	459.884	943.932	NA	NA	NA	NA	NA
comp2273738_c0_seq7	17.7187	151.529	8.15677	65.9233	12.3468	24.1378	ref|XP_014280045.1| PREDICTED: tyrosine-protein phosphatase non-receptor type 11-like isoform X1 [Halyomorpha halys]	6e-91	37	56	8
comp2273767_c0_seq1	574.905	536.148	109.282	328.265	491.707	503.57	NA	NA	NA	NA	NA
comp2273776_c2_seq5	3.52124	4.94912	86.1766	8.73163	4.75923	3.75387	emb|CCA79419.1| putative phage protein p13 [blood disease bacterium R229]	2e-147	67	81	0
comp2273841_c0_seq2	292.223	218.611	92.165	309.923	241.886	193.938	ref|XP_006825780.1| PREDICTED: uncharacterized protein LOC102808491 [Saccoglossus kowalevskii]	2e-123	37	58	2
comp2273842_c1_seq3	77.945	90.3537	44.3158	138.53	100.257	98.3916	ref|XP_011677077.1| PREDICTED: RNA-directed DNA polymerase from mobile element jockey-like [Strongylocentrotus purpuratus]	1e-50	28	47	5
comp2273876_c0_seq8	298.997	307.042	924.889	496.664	327.736	333.864	gb|EKC38105.1| hypothetical protein CGI_10022696 [Crassostrea gigas]	5e-79	39	62	4
comp2273879_c0_seq1	603.239	559.028	219.809	425.677	618.076	515.32	ref|XP_009052394.1| hypothetical protein LOTGIDRAFT_115477 [Lottia gigantea] gb|ESO96899.1| hypothetical protein LOTGIDRAFT_115477 [Lottia gigantea]	1e-42	57	73	2
comp2273937_c0_seq1	182.633	195.699	115.25	21.3119	145.882	128.554	ref|XP_003882944.1| serine protease inhibitor dipetalogastin precursor [Neospora caninum Liverpool] emb|CBZ52912.1| serine protease inhibitor dipetalogastin precursor [Neospora caninum Liverpool] tpe|	5e-86	39	52	8
comp2273980_c0_seq1	71.0701	7.3116	37.6667	7.02012	47.2764	11.1348	gb|ELT92696.1| hypothetical protein CAPTEDRAFT_1707 [Capitella teleta]	4e-151	65	80	0
comp2274041_c1_seq1	28.2704	35.3411	45.3091	12.0838	28.2282	22.8894	ref|XP_009057753.1| hypothetical protein LOTGIDRAFT_206668 [Lottia gigantea] gb|ESO91700.1| hypothetical protein LOTGIDRAFT_206668 [Lottia gigantea]	9e-63	64	86	1
comp2274074_c0_seq3	7.99434	51.3682	5.52246	12.8523	11.6925	14.1683	ref|XP_013403455.1| PREDICTED: LOW QUALITY PROTEIN: HORMA domain-containing protein 2-like, partial [Lingula anatina]	9e-177	55	69	10
comp2274137_c0_seq1	6495.63	7405.32	196.482	793.961	3471.04	8809.13	gb|AAC35289.2| fibrillar collagen chain FAp1 alpha [Alvinella pompejana]	5e-112	65	78	3
comp2274137_c1_seq25	2611.08	4781.06	215.317	1356.08	2108.23	3797.67	NA	NA	NA	NA	NA
comp2274204_c0_seq5	103.381	119.443	76.0739	262.303	88.3322	90.0973	ref|XP_013420317.1| PREDICTED: outer dense fiber protein 2-like [Lingula anatina]	0	49	72	7
comp2274336_c0_seq18	20.6139	18.4672	253.659	85.3382	16.3707	19.423	ref|XP_013408747.1| PREDICTED: acyloxyacyl hydrolase-like [Lingula anatina]	1e-49	40	59	8
comp2274374_c0_seq4	2890.46	128.691	161.842	166.003	2011.49	145.547	ref|XP_005099750.2| PREDICTED: arylsulfatase B-like [Aplysia californica]	2e-117	40	57	7
comp2274439_c0_seq36	642.146	575.104	2228.87	8367.22	581.919	590.622	NA	NA	NA	NA	NA
comp2274652_c0_seq1	182.248	226.451	105.619	51.7249	151.717	195.447	gb|ELU02314.1| hypothetical protein CAPTEDRAFT_226476 [Capitella teleta]	2e-164	44	64	11
comp2274806_c0_seq1	1683.41	2486.71	687.844	2500.81	1754.26	1766.67	ref|XP_012945736.1| PREDICTED: titin-like [Aplysia californica]	0	37	53	3
comp2274845_c0_seq12	54.7342	46.106	173.76	44.1367	77.0198	89.8553	ref|XP_011444812.1| PREDICTED: uncharacterized protein LOC105340464 [Crassostrea gigas]	2e-92	45	62	2
comp2274876_c0_seq3	3580.17	4657.06	2570.31	1529.98	4000.94	3761.19	gb|ELT93703.1| hypothetical protein CAPTEDRAFT_160347 [Capitella teleta]	6e-79	75	87	0
comp2275001_c0_seq1	5.05052	29.7251	5.2987	17.9933	3.98633	9.27273	ref|XP_013379515.1| PREDICTED: disintegrin and metalloproteinase domain-containing protein 10-like [Lingula anatina]	6e-59	34	48	6
comp2275106_c0_seq3	10.9972	169.133	11.1104	6.85904	9.7646	24.5181	ref|XP_013393057.1| PREDICTED: uncharacterized protein LOC106160837 [Lingula anatina]	6e-74	40	60	5
comp2275149_c1_seq1	475.177	547.572	40.526	444.354	803.983	487.873	ref|XP_011446877.1| PREDICTED: RNA-directed DNA polymerase from mobile element jockey-like [Crassostrea gigas]	2e-23	45	65	5
comp2275163_c0_seq2	1.44932	24.9668	0.417457	5.48327	3.29732	8.89768	NA	NA	NA	NA	NA
comp2275163_c1_seq1	3.23224	27.7459	1.95904	2.396	3.17859	6.67235	NA	NA	NA	NA	NA
comp2275196_c0_seq2	48.4321	57.7032	54.7183	18.9161	50.1862	56.9654	ref|XP_009064469.1| hypothetical protein LOTGIDRAFT_168338 [Lottia gigantea] gb|ESO84849.1| hypothetical protein LOTGIDRAFT_168338 [Lottia gigantea]	4e-97	50	66	10
comp2275309_c0_seq2	249.417	243.576	230.596	143.643	229.997	245.652	gb|ELT94850.1| hypothetical protein CAPTEDRAFT_225205 [Capitella teleta]	2e-48	30	49	4
comp2275437_c0_seq1	29.8569	40.8701	144.341	16.5269	31.3577	35.3592	gb|ELT93553.1| hypothetical protein CAPTEDRAFT_223868 [Capitella teleta]	4e-45	31	54	12
comp2275485_c0_seq1	2438.47	3917.6	798.136	4781.96	3032.05	1127.15	ref|XP_013396516.1| PREDICTED: sushi, von Willebrand factor type A, EGF and pentraxin domain-containing protein 1-like isoform X1 [Lingula anatina]	0	47	64	1
comp2275544_c0_seq2	184.794	192.816	246.162	84.6677	154.924	160.633	ref|XP_011433321.1| PREDICTED: DNA repair protein RAD51 homolog 1 isoform X1 [Crassostrea gigas] ref|XP_011433322.1| PREDICTED: DNA repair protein RAD51 homolog 1 isoform X1 [Crassostrea gigas] ref|XP	0	91	97	0
comp2275643_c1_seq4	88.8486	205.599	53.2761	1650.98	87.0359	142.549	pdb|3VVV|A Chain A, Skich Domain Of Ndp52 pdb|3VVW|A Chain A, Ndp52 In Complex With Lc3c	3e-05	33	50	6
comp2275865_c0_seq3	1.6175	62.2629	6.77483	39.8627	0.917702	10.5441	ref|XP_001316015.1| hypothetical protein [Trichomonas vaginalis G3] gb|EAY03792.1| hypothetical protein TVAG_454310 [Trichomonas vaginalis G3]	1e-12	35	53	4
comp2275893_c0_seq1	12254.2	15024.5	295.585	1572.38	6610.72	17838.1	sp|P30754.2|CAFF_RIFPA RecName: Full=Fibril-forming collagen alpha chain	2e-14	60	69	0
comp2276073_c0_seq1	26.6935	38.2023	1028.82	282.742	22.0303	23.4074	ref|XP_010305021.1| PREDICTED: xanthine dehydrogenase/oxidase, partial [Balearica regulorum gibbericeps]	2e-106	64	77	0
comp2276073_c1_seq1	104.442	106.406	3281.5	922.213	79.7259	88.3329	gb|KFO82664.1| Xanthine dehydrogenase/oxidase [Cuculus canorus]	0	50	67	1
comp2276099_c0_seq2	408.1	366.76	134.005	66.9796	407.064	486.443	ref|XP_013418888.1| PREDICTED: multidrug resistance protein 1-like [Lingula anatina]	0	54	68	7
comp2276115_c0_seq1	185.379	78.8545	281.71	71.547	160.849	116.601	gb|ELT87158.1| hypothetical protein CAPTEDRAFT_221642 [Capitella teleta]	2e-32	32	53	10
comp2276134_c0_seq2	22.6109	411.213	34.0051	27.7316	21.405	74.5684	ref|XP_002731383.2| PREDICTED: uncharacterized protein LOC100370297, partial [Saccoglossus kowalevskii]	0	35	57	7
comp2276220_c1_seq6	448.607	517.493	109.601	719.559	709.775	560.412	NA	NA	NA	NA	NA
comp2276235_c1_seq9	214.69	241.342	17.4063	140.175	313.229	175.617	ref|XP_003731656.2| PREDICTED: uncharacterized protein LOC100891575, partial [Strongylocentrotus purpuratus]	1e-96	40	58	6
comp2276293_c1_seq2	1845.68	1921.19	277.737	969.888	1897.87	1209.26	gb|EKC23565.1| Neurogenic locus notch-like protein 2 [Crassostrea gigas]	3e-10	34	53	5
comp2276314_c0_seq1	1694.13	1631.97	3168.77	1811.72	1681.59	1825.97	ref|XP_013397030.1| PREDICTED: 26S proteasome non-ATPase regulatory subunit 2-like [Lingula anatina]	0	80	90	1
comp2276417_c1_seq3	2.25669	3.97031	75.4195	5.22477	3.25681	3.73313	NA	NA	NA	NA	NA
comp2276495_c0_seq1	86.8588	81.4089	116.088	369.006	86.1029	74.3444	NA	NA	NA	NA	NA
comp2276495_c1_seq35	594.156	623.331	754.429	2365.36	480.788	481.503	ref|XP_013421227.1| PREDICTED: C-Maf-inducing protein-like [Lingula anatina]	0	72	85	2
comp2276586_c0_seq3	706.639	43.0409	734.911	21.8992	481.704	33.7045	gb|ELT87158.1| hypothetical protein CAPTEDRAFT_221642 [Capitella teleta]	1e-34	33	54	7
comp2276599_c1_seq1	214.718	216.622	154.968	51.4125	213.398	184.154	ref|XP_011427770.1| PREDICTED: melanoma-associated antigen G1-like [Crassostrea gigas] gb|EKC40974.1| Melanoma-associated antigen G1 [Crassostrea gigas]	2e-59	49	66	6
comp2276721_c0_seq4	150.824	208.893	108.66	26.7113	114.745	141.571	ref|XP_013417325.1| PREDICTED: cytoskeleton-associated protein 2-like [Lingula anatina]	3e-51	39	57	14
comp2276727_c0_seq2	17.6388	223.563	24.1156	16.8622	22.4241	43.134	ref|XP_002733692.2| PREDICTED: atrial natriuretic peptide receptor 1-like [Saccoglossus kowalevskii]	0	37	55	7
comp2276830_c0_seq8	6244.38	10148.3	1676.98	8055.67	8380.75	2545.51	ref|XP_013408745.1| PREDICTED: signal peptide, CUB and EGF-like domain-containing protein 3 [Lingula anatina]	0	41	57	5
comp2276940_c0_seq2	2228.3	3477.57	145.437	400.922	2296.25	2554.7	gb|ELT96028.1| hypothetical protein CAPTEDRAFT_227990 [Capitella teleta]	3e-140	40	57	10
comp2277010_c0_seq2	376.518	403.425	294.693	45.6276	251.594	456.747	ref|XP_013393100.1| PREDICTED: zygotic DNA replication licensing factor mcm3-like [Lingula anatina] ref|XP_013409928.1| PREDICTED: zygotic DNA replication licensing factor mcm3-like [Lingula anatina]	0	68	83	3
comp2277203_c0_seq4	1153.62	1187.38	4800.13	1884.44	1272.2	1365.86	gb|ELU03400.1| hypothetical protein CAPTEDRAFT_18069 [Capitella teleta]	0	70	84	1
comp2277336_c1_seq6	783.736	3586.38	379.852	3553.28	776.835	2779.1	ref|XP_014782618.1| PREDICTED: putative protein TPRXL [Octopus bimaculoides] gb|KOF74129.1| hypothetical protein OCBIM_22036689mg [Octopus bimaculoides]	4e-08	49	67	0
comp2277376_c0_seq3	558.345	627.872	391.604	46.1512	382.391	492.993	ref|XP_011443137.1| PREDICTED: DNA replication licensing factor mcm7-like [Crassostrea gigas] gb|EKC32434.1| DNA replication licensing factor mcm7 [Crassostrea gigas]	0	81	91	0
comp2277490_c0_seq4	112.274	154.119	129.219	32.3491	72.8794	94.2697	ref|XP_013409650.1| PREDICTED: cell division cycle protein 20 homolog [Lingula anatina] ref|XP_013409652.1| PREDICTED: cell division cycle protein 20 homolog [Lingula anatina]	3e-173	52	67	8
comp2277568_c0_seq5	62.9903	264.801	40.3337	288.652	95.4966	120.399	ref|XP_014673338.1| PREDICTED: adenylate cyclase type 10-like [Priapulus caudatus]	0	37	55	7
comp2277837_c0_seq3	205.988	182.657	170.804	41.7147	166.252	143.538	ref|XP_008425849.1| PREDICTED: ribonucleoside-diphosphate reductase large subunit-like [Poecilia reticulata]	5e-49	70	78	8
comp2277838_c2_seq5	320.59	93.8164	268.391	63.8561	299.046	128.43	NA	NA	NA	NA	NA
comp2277995_c0_seq1	8837.91	11348.3	696.909	1842.68	8509.81	10037.9	NA	NA	NA	NA	NA
comp2278093_c0_seq2	1912.32	1552.59	2443.8	1609.32	1924.87	1376.96	ref|XP_013411113.1| PREDICTED: multidrug resistance-associated protein 1-like isoform X3 [Lingula anatina]	0	59	74	3
comp2278097_c0_seq3	2.05869	33.3908	2.08729	2.74494	1.46773	5.36244	NA	NA	NA	NA	NA
comp2278120_c0_seq8	168.426	356.33	79.0289	287.32	143.558	303.039	ref|XP_004920790.1| PREDICTED: uncharacterized protein LOC101734340, partial [Xenopus tropicalis]	2e-60	43	63	0
comp2278120_c2_seq1	1794.15	1482.29	232.523	925.765	2298.33	1994.94	gb|ELU11830.1| hypothetical protein CAPTEDRAFT_188638 [Capitella teleta]	2e-06	41	51	6
comp2278165_c1_seq1	353.024	327.646	310.881	552.613	368.246	325.206	ref|XP_013385075.1| PREDICTED: mediator of RNA polymerase II transcription subunit 1-like [Lingula anatina]	8e-20	41	56	17
comp2278194_c0_seq1	8711.57	7496.82	16479.7	4458.18	6335.6	7157.91	ref|XP_009051879.1| hypothetical protein LOTGIDRAFT_214098 [Lottia gigantea] gb|ESO97274.1| hypothetical protein LOTGIDRAFT_214098 [Lottia gigantea]	0	79	90	0
comp2278252_c0_seq1	1919.47	2325.55	515.274	1120.8	1627.36	2941.43	ref|XP_013415761.1| PREDICTED: collagen alpha-1(I) chain-like [Lingula anatina]	4e-93	58	75	2
comp2278285_c0_seq4_contamination	62.4199	61.5294	1031.95	101.714	69.3018	61.0634	dbj|BAA20419.1| reverse transcriptase [Mus musculus]	0	98	98	0
comp2278303_c0_seq3	121.785	111.772	360.301	1615.61	136.179	148.438	ref|XP_013381461.1| PREDICTED: dynein beta chain, ciliary-like [Lingula anatina]	2e-175	33	53	11
comp2278385_c0_seq24	5631.54	5451.01	2199.62	6245.91	7408.54	4344.98	ref|XP_013124995.1| PREDICTED: RNA-directed DNA polymerase from mobile element jockey-like [Oreochromis niloticus]	1e-32	34	55	10
comp2278420_c1_seq3	327.74	347.892	3129.04	11591.3	142.849	193.251	NA	NA	NA	NA	NA
comp2278452_c1_seq5	16.5529	23.2263	200.032	31.5167	15.7049	18.9258	ref|WP_041296550.1| hypothetical protein [Janthinobacterium sp. Marseille]	1e-125	55	71	0
comp2278464_c0_seq2	7674.16	11213.1	839.391	1999.72	7975.71	10941.9	ref|XP_014773507.1| PREDICTED: myosin heavy chain, non-muscle-like, partial [Octopus bimaculoides]	1e-69	37	61	7
comp2278563_c0_seq1	67.3884	77.7504	626.485	111.728	70.9314	74.5296	ref|WP_054484918.1| hypothetical protein [Achromobacter sp.] emb|CUJ02942.1| DNA primase (bacterial type) [Achromobacter sp.]	0	59	75	0
comp2278626_c0_seq2	10.8699	8.1013	69.6746	8.04695	10.2422	13.1741	gb|KXB08465.1| hypothetical protein AKJ59_00860 [candidate divison MSBL1 archaeon SCGC-AAA385M02]	2e-12	55	74	1
comp2279271_c0_seq1	2.03225	146.755	4.33553	2.30537	4.12236	29.7909	NA	NA	NA	NA	NA
comp2279378_c0_seq1	391.316	326.244	16.8579	92.8462	483.654	239.908	NA	NA	NA	NA	NA
comp2279447_c0_seq1	107.151	1.5999	462.988	23.8492	86.2299	3.01924	NA	NA	NA	NA	NA
comp2279470_c0_seq1	36.5075	4.51669	3.21141	0.852361	27.8083	1.79462	NA	NA	NA	NA	NA
comp2279830_c0_seq1_contamination	13.8971	14.012	91.6808	12.0838	29.0159	16.4752	gb|ABK79278.1| cytochrome c oxidase subunit II (mitochondrion) [Mus musculus domesticus]	3e-109	91	98	0
comp2279863_c0_seq1	11.3465	1.27943	18.3681	0.42618	10.0511	0	NA	NA	NA	NA	NA
comp2279899_c0_seq1	61.5323	1.24416	1.66983	1.2013	36.8116	2.65603	NA	NA	NA	NA	NA
comp2279956_c0_seq1	642.738	438.715	50.6706	156.098	452.516	380.831	NA	NA	NA	NA	NA
comp2280031_c0_seq1	1.61197	32.7022	1.6057	6.60073	1.10006	4.11708	NA	NA	NA	NA	NA
comp2280693_c0_seq1	2.53186	38.9492	1.18825	21.0035	153.662	1.43141	NA	NA	NA	NA	NA
comp2281004_c0_seq1_contamination	7.76067	7.72814	65.5119	1.02683	5.17905	6.29203	ref|YP_009112413.1| ATP synthase F0 subunit 6 (mitochondrion) [Mus spretus] gb|AIY72201.1| ATP synthase F0 subunit 6 (mitochondrion) [Mus spretus]	1e-90	93	99	0
comp2282468_c0_seq1	2.27268	21.8766	5.87579	2.14429	3.0223	7.64342	NA	NA	NA	NA	NA
comp2282832_c0_seq1	43.919	40.9211	1630.88	19.7818	42.017	35.2452	gb|ACT88135.1| GH20886p [Drosophila melanogaster]	3e-69	100	100	0
comp2288568_c0_seq1	1.03734	2.16588	44.3132	1.45301	1.39533	1.25426	gb|ADC53751.1| AT09839p [Drosophila melanogaster]	9e-107	99	100	0
gi_146189520_emb_AM697674.1_Platynereis_dumerilii_mRNA_for_hypothetical_protein_(ORF1)_isolate_2	2345.98	2848.06	468.928	3083.83	3612.15	2745.64	NA	NA	NA	NA	NA
gi|563607183|gb|KF515933.1|_Platynereis_dumerilii_SHM_neuropeptide_precursor,_mRNA,_partial_cds	23.0926	20.6276	2.08729	31.2716	22.0969	15.9065	NA	NA	NA	NA	NA
gnl|Pdu_trscr_assembly_1|1374	1685.32	902.116	1832.97	541.311	1160.4	764.156	NA	NA	NA	NA	NA
gnl|Pdu_trscr_assembly_1|1470	39.6073	24.7387	49.6106	5.82542	20.7044	24.9284	NA	NA	NA	NA	NA
gnl|Pdu_trscr_assembly_1|159181	28.3182	7.59283	84.4585	6.2516	183.61	22.4515	NA	NA	NA	NA	NA
gnl|Pdu_trscr_assembly_1|19656	177.066	214.249	279.147	29.4361	142.412	182.746	NA	NA	NA	NA	NA
gnl|Pdu_trscr_assembly_1|200732	10750	18544.9	642.446	3612.01	7438.75	15908.6	NA	NA	NA	NA	NA
gnl|Pdu_trscr_assembly_1|212085	5.66541	8.92097	227.282	11.1342	3.47967	4.39137	NA	NA	NA	NA	NA
gnl|Pdu_trscr_assembly_1|219156	2829.91	3710.69	421.493	1761.86	2812.58	3580.9	NA	NA	NA	NA	NA
gnl|Pdu_trscr_assembly_1|264234	9.04828	6.98518	67.0196	5.47649	11.1222	6.86135	NA	NA	NA	NA	NA
gnl|Pdu_trscr_assembly_1|264488	2.78335	11.3531	93.0261	20.8923	3.50575	2.84208	NA	NA	NA	NA	NA
gnl|Pdu_trscr_assembly_1|4989	66.1689	77.1505	87.7955	24.1209	38.9886	57.7606	NA	NA	NA	NA	NA
gnl|Pdu_trscr_assembly_1|5866	134.279	118.141	81.0508	32.8857	91.4644	145.268	NA	NA	NA	NA	NA
gnl|Pdu_trscr_assembly_1|7335	234.754	278.354	173.402	24.9866	155.379	241.89	NA	NA	NA	NA	NA
gnl|Pdu_trscr_assembly_1|88504	50.8249	47.9994	16.3436	59.8155	33.8184	41.6472	NA	NA	NA	NA	NA
Pdu_c-opsin1_cDNA_	13.6674	14.794	1776.47	74.9152	30.0605	50.1492	gb|AAV63834.1| ciliary opsin [Platynereis dumerilii]	0	100	100	0
Pdu_Vtg_2.1	1.01583	0.190648	63.2977	1.54364	5.28318	0	gb|AHY02164.1| vitellogenin [Perinereis aibuhitensis]	0	59	77	3
