# Supplementary material for: Combined transcriptome and proteome profiling reveals specific molecular brain signatures for sex, maturation and circalunar clock phase
Source: eLife. 2019 Feb 15;8:e41556. doi: 10.7554/eLife.41556 (PMC6377233; doi:10.7554/eLife.41556)
Supplement: Figure 3—source data 15. — This file contains the IDs, mean expression values, top hit by blastX with e-value cut-off 10-4, e-value corresponding to blast hit, number of identical/ similar AA or gaps in blast alignment ("identity", "positives", "gaps") for all transcripts significantly regulated between circalunar phases. [file elife-41556-fig3-data15.xlsx]

## Sheet: 20181212_allLunarProtein_meanEx
Protein.ID	IM_NM_mean	IM_FRFM_mean	PM_NM_F_mean	PM_FRFM_F_mean	PM_NM_M_mean	PM_FRFM_M_mean	Top.hit.ID	E.value	Identity....	Positives....	Gaps....
comp1194290_c0_seq1_m.781	2.11809	3.5894	1.33205	1.41901	1.36326	1.3635	NA	NA	NA	NA	NA
comp1194294_c0_seq1_m.785	1.50645	0.957182	1.71931	1.92722	1.91074	1.23814	ref|XP_014703348.1| PREDICTED: 40S ribosomal protein S13 [Equus asinus]	3e-101	92	99	0
comp1197507_c0_seq1_m.1032	4.51055	3.3108	3.13097	2.80261	3.71467	3.18839	gb|ELT96049.1| hypothetical protein CAPTEDRAFT_223820 [Capitella teleta]	2e-07	33	53	4
comp1201878_c0_seq1_m.1138	1.05016	NA	0.949798	NA	1.00078	NA	NA	NA	NA	NA	NA
comp1785956_c0_seq1_m.2259	2.58175	2.20241	3.39289	3.31403	3.16951	2.421	gb|ALO75581.1| hemoglobin subunit A2 [Siboglinum ekmani]	2e-30	40	58	0
comp1838578_c0_seq1_m.2293	13.9602	7.25429	13.8873	11.7055	14.7217	10.0955	sp|P22761.1|HEMTM_HEDDI RecName: Full=Myohemerythrin; Short=MHr	8e-48	68	78	0
comp1910314_c0_seq1_m.2848	1.44819	1.35124	0.909145	0.710582	1.0871	0.754642	gb|ABO26646.1| mitochondrial ATP synthase delta chain [Haliotis discus discus]	6e-74	67	83	0
comp1916779_c0_seq1_m.2944	9.05603	9.1925	6.55465	6.36104	7.25721	6.23977	gb|ELU17153.1| hypothetical protein CAPTEDRAFT_119323 [Capitella teleta]	2e-38	54	78	1
comp1953077_c0_seq1_m.3483	0.788532	1.17245	0.525192	0.60611	0.531594	1.01717	gb|ELU09461.1| hypothetical protein CAPTEDRAFT_223662 [Capitella teleta]	2e-60	35	50	10
comp1958245_c0_seq1_m.3536	1.84135	0.931473	1.31913	0.974845	1.41261	0.953051	gb|ACD65133.1| putative 60S ribosomal protein RPLP1 [Novocrania anomala]	9e-23	76	90	0
comp1965369_c0_seq1_contamination_m.3664	3.24508	2.68882	2.99256	2.10154	3.70963	1.21372	ref|XP_001967880.1| uncharacterized protein Dana_GF22861 [Drosophila ananassae] ref|XP_001967919.1| uncharacterized protein Dana_GF18864 [Drosophila ananassae] gb|EDV44842.1| uncharacterized protein D	1e-66	97	98	2
comp1977957_c0_seq1_m.3878	0.814232	0.832319	1.17595	1.08089	1.10164	0.884425	gb|EDL17115.1| ribosomal protein S15a, isoform CRA_b [Mus musculus]	4e-83	85	92	0
comp2004487_c0_seq1_m.4269	1.30661	1.39969	1.36319	1.21188	1.63648	0.913306	emb|CAL26301.1| CG5499 [Drosophila melanogaster]	6e-74	100	100	0
comp2072973_c0_seq1_m.5296	1.41739	1.40374	1.59751	1.39544	1.68061	1.22616	ref|XP_011432488.1| PREDICTED: 40S ribosomal protein S24-like isoform X2 [Crassostrea gigas]	1e-56	84	94	0
comp2139115_c0_seq1_m.6894	17.6001	11.3658	15.9724	13.2474	16.3067	14.0631	gb|ELU06446.1| hypothetical protein CAPTEDRAFT_21877 [Capitella teleta]	1e-172	77	87	0
comp2139434_c0_seq1_m.6943	2.25186	1.63302	2.13074	1.88693	2.24193	1.70115	gb|ABW23151.1| ribosomal protein rps23 [Arenicola marina]	2e-96	98	99	0
comp2141229_c0_seq1_m.7283	3.55637	2.82421	2.44018	2.07349	3.12141	2.25489	gb|KIL68019.1| hypothetical protein M378DRAFT_72303 [Amanita muscaria Koide BX008]	1e-48	51	67	4
comp2143411_c0_seq1_m.7656	4.32592	3.39502	3.4769	2.9891	3.80153	3.04289	ref|XP_014788900.1| PREDICTED: ATP synthase subunit d, mitochondrial-like [Octopus bimaculoides] gb|KOF65363.1| hypothetical protein OCBIM_22015716mg [Octopus bimaculoides]	4e-50	56	72	1
comp2189372_c0_seq1_m.11219	4.80544	6.12367	2.81245	1.96527	3.3757	2.49654	gb|AEB54654.1| ATPase inhibitory factor 1 [Procambarus clarkii]	7e-17	56	86	0
comp2197446_c0_seq1_m.12404	5.20546	4.48893	6.47012	5.60365	6.08742	4.67061	gb|AAX28980.1| ribosomal protein S3 [synthetic construct]	2e-157	92	96	0
comp2201786_c0_seq1_m.13247	0.85287	0.61052	1.25239	1.20758	1.43496	0.972715	gb|ABZ04268.1| ribosomal protein rps19 [Lineus viridis]	5e-78	73	87	0
comp2204672_c0_seq1_m.13711	0.929275	NA	0.734679	NA	0.786412	NA	ref|XP_013383370.1| PREDICTED: neudesin-like [Lingula anatina]	2e-44	66	83	2
comp2206512_c0_seq1_m.14012	6.08269	7.71633	5.62171	6.02192	6.49782	5.30607	gb|KJH53109.1| core histone H2A/H2B/H3/H4 [Dictyocaulus viviparus]	1e-87	97	99	0
comp2208016_c0_seq1_m.14262	1.82958	1.96266	1.8053	1.7891	2.02796	1.74346	gb|ABZ04265.1| ribosomal protein rps14 [Lineus viridis]	1e-76	93	96	0
comp2208429_c0_seq1_m.14341	2.19869	1.74326	2.15978	2.15713	2.46472	1.79097	gb|ABW23179.1| ribosomal protein rpl24 [Arenicola marina]	6e-60	78	86	1
comp2208474_c0_seq1_m.14351	6.14871	6.06727	3.60478	2.39762	4.20623	2.64405	gb|AHB62365.1| whitnin-1 neuropeptide precursor SPTR [Platynereis dumerilii]	7e-64	100	100	0
comp2212572_c0_seq1_m.15390	0.750878	1.07049	0.930864	1.08733	0.891072	1.04274	ref|XP_002733522.1| PREDICTED: 26S proteasome non-ATPase regulatory subunit 3-like isoform X1 [Saccoglossus kowalevskii]	0	71	86	1
comp2217905_c0_seq1_m.17239	3.09814	3.11651	3.35594	3.14092	3.42502	2.51422	ref|NP_001037263.1| ribosomal protein S8 [Bombyx mori] gb|AAV34864.1| ribosomal protein S8 [Bombyx mori]	1e-120	79	92	0
comp2220386_c0_seq1_m.18230	4.93397	5.29886	5.0178	4.4223	5.50647	4.35549	gb|AIU94815.1| 40S ribosomal protein [Phragmatopoma lapidosa]	2e-86	90	97	0
comp2222959_c0_seq1_m.19328	1.19325	1.19017	0.768414	0.933358	0.879455	0.709445	ref|NP_001248345.1| histone 1o [Aplysia californica] gb|ABW86950.1| histone 1o [Aplysia californica]	4e-32	78	91	0
comp2223962_c0_seq7_m.19686	3.42802	3.4213	2.15262	1.5998	2.63369	1.82307	gb|ELT96049.1| hypothetical protein CAPTEDRAFT_223820 [Capitella teleta]	1e-14	38	54	1
comp2224014_c0_seq1_m.19704	2.40245	1.47675	1.88009	1.58577	2.26075	1.68945	sp|Q6QLW4.1|CYC_PECGU RecName: Full=Cytochrome c gb|AAS48105.1| cytochrome c [Pectinaria gouldii]	8e-66	92	96	0
comp2224040_c0_seq1_m.19713	3.99277	2.79854	3.86241	3.55682	4.25373	3.23431	ref|XP_005109109.1| PREDICTED: 60S ribosomal protein L14 [Aplysia californica]	4e-62	71	88	0
comp2226635_c0_seq1_m.20829	2.43507	1.98475	2.24096	1.92691	2.45109	1.88907	gb|AIU94829.1| 60S ribosomal protein [Phragmatopoma lapidosa]	1e-53	66	87	1
comp2229729_c0_seq1_m.22264	0.206009	0.270677	0.410257	0.550649	0.407946	0.430252	gb|AFP52951.1| beta-actin [Euphyllia ancora]	4e-158	64	79	5
comp2232113_c0_seq1_m.23538	0.959547	0.683178	1.01415	0.822878	0.995325	0.763747	gb|ELT98287.1| hypothetical protein CAPTEDRAFT_152113 [Capitella teleta]	3e-154	86	95	0
comp2232805_c0_seq1_m.23974	3.38526	2.33693	3.51833	3.39679	3.77214	3.51154	gb|ELT87930.1| hypothetical protein CAPTEDRAFT_224291 [Capitella teleta]	1e-91	52	64	4
comp2233700_c1_seq1_m.24550	0.437179	0.677293	0.765905	0.82612	0.687263	0.766485	ref|XP_006818908.1| PREDICTED: poly(ADP-ribose) polymerase pme-5-like [Saccoglossus kowalevskii]	1e-66	42	62	4
comp2234809_c0_seq1_m.25266	6.76091	4.31126	5.91683	4.64995	6.16023	5.2501	ref|XP_003383648.1| PREDICTED: profilin-like [Amphimedon queenslandica]	6e-40	57	73	0
comp2235681_c0_seq1_m.25791	1.67251	0.739464	1.25195	1.01558	1.43761	0.955611	gb|ELU04229.1| hypothetical protein CAPTEDRAFT_20984 [Capitella teleta]	7e-43	60	79	0
comp2236007_c0_seq2_m.26049	4.40211	3.78263	3.97276	3.11598	4.17722	3.3574	ref|XP_004066909.1| PREDICTED: cellular retinoic acid-binding protein 1 [Oryzias latipes]	8e-24	42	55	17
comp2237053_c0_seq1_m.26700	3.29105	2.33738	3.73152	3.24425	4.01835	2.82661	gb|KFO64775.1| 40S ribosomal protein S16, partial [Corvus brachyrhynchos]	1e-91	86	93	0
comp2237468_c0_seq1_m.27022	7.29949	8.41118	2.48874	1.80604	2.84985	2.502	NA	NA	NA	NA	NA
comp2239691_c0_seq1_m.28548	25.7057	17.4298	22.8302	18.6799	27.306	16.8167	sp|P04571.1|SCP_HEDDI RecName: Full=Sarcoplasmic calcium-binding protein; Short=SCP pdb|2SCP|A Chain A, Structure Of A Sarcoplasmic Calcium-Binding Protein From Nereis Diversicolor Refined At 2.0 Angs	3e-88	78	86	0
comp2241299_c0_seq1_m.29837	2.59548	2.41274	2.73602	2.39057	2.71738	2.17196	ref|XP_011441305.1| PREDICTED: 60S ribosomal protein L11-like [Crassostrea gigas]	3e-105	89	95	0
comp2241424_c0_seq3_m.29932	1.78321	0.923523	1.61075	1.34502	1.73035	1.57657	ref|XP_011444269.1| PREDICTED: peptidyl-prolyl cis-trans isomerase-like [Crassostrea gigas] gb|EKC29243.1| Peptidyl-prolyl cis-trans isomerase B [Crassostrea gigas]	2e-91	60	79	0
comp2242407_c0_seq1_m.30845	0.888075	0.467111	1.02817	1.07798	1.22302	0.825943	NA	NA	NA	NA	NA
comp2243258_c0_seq1_m.31584	1.93503	1.656	1.81246	1.52348	2.15708	1.28908	sp|P02219.1|GLB1_TYLHE RecName: Full=Extracellular globin-1; AltName: Full=Erythrocruorin; AltName: Full=Extracellular globin I prf||0812179A hemoglobin	2e-34	49	63	2
comp2243933_c0_seq1_m.32211	3.12836	2.81422	2.20829	2.23832	2.41793	1.88904	gb|ELU14393.1| hypothetical protein CAPTEDRAFT_176878 [Capitella teleta]	3e-104	87	94	0
comp2244437_c0_seq1_m.32653	1.75985	1.32966	1.38364	1.19372	1.64636	1.22762	ref|XP_013399401.1| PREDICTED: transcription elongation factor B polypeptide 1 [Lingula anatina]	3e-70	95	98	1
comp2244716_c0_seq1_m.32883	2.15112	1.84016	3.06386	2.61857	2.88731	2.15889	ref|XP_009021809.1| hypothetical protein HELRODRAFT_157417 [Helobdella robusta] gb|ESO00035.1| hypothetical protein HELRODRAFT_157417 [Helobdella robusta]	2e-102	78	90	1
comp2244968_c0_seq1_m.33120	3.98623	2.59445	3.97841	3.36615	4.78063	2.91754	ref|XP_002057775.1| Thioredoxin-2 [Drosophila virilis] gb|EDW57848.1| Thioredoxin-2 [Drosophila virilis]	1e-32	61	73	0
comp2245603_c0_seq1_m.33759	0.789971	0.474743	0.753778	0.671895	0.82022	0.571015	gb|ABW23167.1| ribosomal protein rpl12 [Arenicola marina]	4e-96	85	93	0
comp2247098_c0_seq1_m.35275	1.24271	0.457014	1.37823	1.07719	1.60133	0.981467	ref|XP_009065267.1| hypothetical protein LOTGIDRAFT_229629 [Lottia gigantea] gb|ESO84141.1| hypothetical protein LOTGIDRAFT_229629 [Lottia gigantea]	3e-05	28	47	4
comp2247176_c0_seq3_m.35337	0.517551	0.488501	0.422189	0.299564	0.441895	0.290683	NA	NA	NA	NA	NA
comp2248226_c3_seq1_m.36365	9.14286	5.68459	9.18144	7.64927	9.525	7.53742	gb|ELU15616.1| hypothetical protein CAPTEDRAFT_148920 [Capitella teleta]	2e-157	78	89	0
comp2248291_c0_seq1_m.36455	1.49647	1.38295	1.30795	1.08436	1.2775	1.14404	ref|XP_013408072.1| PREDICTED: protein SEC13 homolog [Lingula anatina]	4e-153	81	90	0
comp2248821_c1_seq2_m.37050	2.02407	2.51266	1.5258	1.58333	1.50728	2.05498	ref|XP_011159196.1| PREDICTED: 1,2-dihydroxy-3-keto-5-methylthiopentene dioxygenase isoform X1 [Solenopsis invicta] gb|EFZ18588.1| hypothetical protein SINV_10573, partial [Solenopsis invicta]	3e-67	57	76	1
comp2249227_c0_seq1_m.37479	2.22402	2.26351	1.69415	1.32749	1.7983	1.4755	gb|ELU18703.1| hypothetical protein CAPTEDRAFT_166040 [Capitella teleta]	2e-86	69	87	0
comp2250470_c0_seq1_m.38949	7.55956	5.51645	7.8979	6.82895	7.10982	5.74356	gb|ADC80504.1| peptidyl prolyl cis-trans isomerase A (I) [Conus novaehollandiae]	1e-80	82	89	0
comp2250906_c0_seq2_m.39444	5.15207	4.63425	4.21834	3.75141	4.86388	3.50157	gb|ABZ04235.1| ribosomal protein rpl23a [Lineus viridis]	2e-65	77	86	0
comp2251705_c0_seq1_m.40358	6.98508	6.69381	6.26328	4.88385	6.55401	4.81483	gb|ABX75386.1| 60S ribosomal protein L40A [Lycosa singoriensis]	3e-76	97	100	0
comp2251806_c0_seq1_m.40480	1.85146	1.36921	1.46986	1.20339	1.56674	1.19892	gb|ELU12067.1| hypothetical protein CAPTEDRAFT_20975 [Capitella teleta]	6e-58	69	84	1
comp2252506_c0_seq1_m.41372	0.574687	0.281887	0.574782	0.499162	0.587391	0.50643	NA	NA	NA	NA	NA
comp2252790_c0_seq1_m.41691	3.26729	2.32021	3.6169	3.84119	4.84863	3.24614	gb|ELT97486.1| hypothetical protein CAPTEDRAFT_221456 [Capitella teleta]	9e-45	69	82	0
comp2253561_c0_seq1_m.42779	1.60071	1.25063	1.36328	1.26461	1.51618	1.29252	gb|ELT98573.1| hypothetical protein CAPTEDRAFT_208996 [Capitella teleta]	3e-82	59	79	1
comp2254394_c0_seq2_m.43926	4.36325	2.34389	3.42923	3.17094	3.84016	3.63682	ref|XP_780677.2| PREDICTED: elongation factor 1-delta-like isoform X1 [Strongylocentrotus purpuratus]	1e-57	48	64	9
comp2254418_c0_seq1_m.43945	1.80115	1.79397	1.5713	1.3765	1.68443	1.30442	ref|XP_014665707.1| PREDICTED: cytochrome b-c1 complex subunit 7-like [Priapulus caudatus]	6e-37	58	74	0
comp2254470_c0_seq1_m.44006	3.39545	2.89484	3.28652	3.68775	3.24899	3.23102	gb|EKC35325.1| Titin [Crassostrea gigas]	8e-150	45	62	5
comp2254520_c0_seq1_m.44059	6.28648	4.26241	4.38483	3.52632	4.08659	3.78666	ref|XP_013779654.1| PREDICTED: heterogeneous nuclear ribonucleoprotein A1, A2/B1 homolog [Limulus polyphemus]	6e-77	69	85	2
comp2254548_c0_seq3_m.44097	1.25708	0.770144	1.1235	1.04854	1.13545	1.0522	gb|ELU03710.1| hypothetical protein CAPTEDRAFT_18710 [Capitella teleta]	1e-92	71	80	1
comp2254568_c0_seq1_m.44123	0.809149	NA	0.733262	NA	0.66718	NA	ref|XP_013789637.1| PREDICTED: neogenin-like, partial [Limulus polyphemus]	1e-16	36	54	12
comp2254641_c1_seq1_m.44200	1.86335	1.82348	1.31684	1.22218	1.43383	1.2362	NA	NA	NA	NA	NA
comp2254668_c0_seq2_m.44236	5.03892	3.7263	4.91365	4.28906	5.77348	4.21035	ref|XP_009049364.1| hypothetical protein LOTGIDRAFT_230861 [Lottia gigantea] gb|ESO99924.1| hypothetical protein LOTGIDRAFT_230861 [Lottia gigantea]	8e-22	33	52	2
comp2256770_c0_seq1_m.46959	4.53576	3.33135	4.4405	4.43052	5.0392	4.21067	ref|XP_009023656.1| hypothetical protein HELRODRAFT_185866 [Helobdella robusta] gb|ESN98321.1| hypothetical protein HELRODRAFT_185866 [Helobdella robusta]	5e-87	62	79	0
comp2256866_c0_seq1_m.47132	0.53859	0.588486	0.512495	0.542986	0.531735	0.594424	ref|XP_009011487.1| hypothetical protein HELRODRAFT_186271 [Helobdella robusta] gb|ESO10425.1| hypothetical protein HELRODRAFT_186271 [Helobdella robusta]	0	72	85	3
comp2257131_c0_seq2_m.47590	1.16486	0.737478	1.03867	0.652358	1.06347	0.572923	gb|AEJ08752.1| allograft inflammatory factor 1 [Crassostrea ariakensis]	2e-55	67	88	0
comp2257395_c0_seq4_m.47951	0.482937	1.1717	1.31227	1.3432	1.17143	1.2482	NA	NA	NA	NA	NA
comp2257415_c0_seq1_m.47965	4.61934	4.04888	4.81001	4.4736	4.75731	3.82034	ref|XP_013093592.1| PREDICTED: 40S ribosomal protein S6 [Biomphalaria glabrata]	6e-123	85	93	0
comp2257487_c0_seq1_m.48064	1.97363	1.98002	1.66304	1.28087	1.79642	1.42287	gb|ELT91420.1| hypothetical protein CAPTEDRAFT_153554 [Capitella teleta]	4e-82	81	91	0
comp2257674_c0_seq1_m.48339	0.0482309	0.113623	0.124095	0.157711	0.101506	0.138881	ref|NP_990307.2| vitamin D3 hydroxylase-associated protein [Gallus gallus]	2e-91	35	55	1
comp2257781_c0_seq1_m.48513	1.28343	1.95071	1.69973	1.93711	1.62167	1.78105	ref|XP_014669426.1| PREDICTED: low-density lipoprotein receptor-related protein 2-like isoform X2 [Priapulus caudatus]	0	38	57	6
comp2257975_c0_seq1_m.48752	2.21182	2.62842	2.56556	2.76673	2.41127	3.0948	ref|XP_011434053.1| PREDICTED: 26S proteasome non-ATPase regulatory subunit 6-like [Crassostrea gigas] gb|EKC40462.1| 26S proteasome non-ATPase regulatory subunit 6 [Crassostrea gigas]	0	78	89	0
comp2258193_c0_seq1_m.49089	7.48281	7.23712	6.29667	6.30086	7.04392	5.93799	gb|ALS04935.1| nucleoside diphosphate kinase A 1 [Pseudodiaptomus poplesia]	6e-78	76	86	0
comp2258349_c0_seq1_m.49321	1.15758	1.7534	1.09518	1.15711	1.0261	1.20983	NA	NA	NA	NA	NA
comp2258609_c0_seq1_m.49647	2.10631	2.08394	2.84277	3.39746	2.69847	2.94132	ref|XP_013380988.1| PREDICTED: 60S ribosomal protein L7-like [Lingula anatina]	5e-142	76	89	0
comp2259230_c0_seq1_m.50704	1.71591	3.11722	1.77319	2.01151	1.77865	2.44173	gb|EKC27215.1| Ras GTPase-activating protein-binding protein 2 [Crassostrea gigas]	1e-107	55	63	9
comp2259823_c0_seq1_m.51564	0.917666	1.00456	0.981851	0.923364	1.06062	0.944874	ref|XP_014787575.1| PREDICTED: cytochrome c oxidase subunit 7A-related protein, mitochondrial-like [Octopus bimaculoides] gb|KOF67305.1| hypothetical protein OCBIM_22010003mg [Octopus bimaculoides]	2e-11	33	46	4
comp2260058_c0_seq1_m.51934	8.11745	4.88465	6.47254	5.14484	6.02468	5.05757	emb|CAM91762.1| hypothetical protein [Platynereis dumerilii]	1e-119	98	99	0
comp2260394_c0_seq1_m.52394	9.53047	8.58595	6.92547	5.57252	7.38262	6.53133	ref|XP_013409592.1| PREDICTED: uncharacterized protein LOC106173136 [Lingula anatina]	6e-08	32	49	7
comp2261047_c0_seq1_m.53653	1.32232	0.920014	1.34889	1.0854	1.31239	1.09896	ref|XP_011444269.1| PREDICTED: peptidyl-prolyl cis-trans isomerase-like [Crassostrea gigas] gb|EKC29243.1| Peptidyl-prolyl cis-trans isomerase B [Crassostrea gigas]	9e-93	63	77	0
comp2261191_c0_seq5_m.53883	NA	NA	NA	NA	NA	NA	ref|XP_013399774.1| PREDICTED: caspase-3-like [Lingula anatina]	5e-100	59	78	1
comp2261334_c1_seq1_m.54085	0.363238	NA	0.421045	NA	0.396572	NA	gb|ELT93278.1| hypothetical protein CAPTEDRAFT_179513 [Capitella teleta]	0	54	71	2
comp2261379_c0_seq1_m.54133	29.8476	9.70188	20.858	18.9427	28.275	17.6727	ref|XP_009018494.1| hypothetical protein HELRODRAFT_185642 [Helobdella robusta] gb|ESO03346.1| hypothetical protein HELRODRAFT_185642 [Helobdella robusta]	3e-61	68	79	0
comp2261623_c0_seq1_m.54431	54.8245	43.1912	53.8669	52.3725	61.411	50.2089	dbj|BAA33059.1| glycocyamine kinase beta chain [Hediste diversicolor]	0	92	95	0
comp2262137_c0_seq4_m.55246	3.02345	1.90394	3.45996	2.19723	3.9353	1.77778	ref|XP_013400763.1| PREDICTED: mammalian ependymin-related protein 1-like [Lingula anatina]	2e-07	35	51	10
comp2262197_c0_seq1_m.55346	0.626214	0.4311	0.778613	0.633704	0.846003	0.539283	emb|CAD91446.1| signal sequence receptor beta-like protein [Crassostrea gigas]	1e-76	63	85	0
comp2262360_c0_seq1_m.55644	4.79565	3.12182	3.21884	2.74787	4.04142	2.80492	ref|XP_013408346.1| PREDICTED: uncharacterized protein LOC106172259 [Lingula anatina]	4e-05	37	55	12
comp2262441_c0_seq1_m.55760	3.75833	3.02883	3.05089	2.61739	3.24423	2.68262	gb|ELU08519.1| hypothetical protein CAPTEDRAFT_158600 [Capitella teleta]	4e-90	78	86	0
comp2263011_c0_seq1_m.56689	5.63215	6.04488	6.41225	7.18496	6.12592	7.76684	gb|ELU04621.1| hypothetical protein CAPTEDRAFT_222921 [Capitella teleta]	0	27	45	12
comp2263073_c0_seq1_m.56786	0.589804	0.988565	0.68615	0.666702	0.691081	0.687118	ref|XP_002737882.1| PREDICTED: coiled-coil-helix-coiled-coil-helix domain-containing protein 3, mitochondrial-like [Saccoglossus kowalevskii]	2e-23	35	61	3
comp2263250_c0_seq1_m.57052	9.59376	6.46173	7.50199	5.33869	7.51456	5.24015	ref|XP_013388478.1| PREDICTED: calmodulin-like protein 3 [Lingula anatina]	1e-25	45	63	1
comp2263394_c0_seq1_m.57263	0.327316	0.244358	0.472095	0.417756	0.487617	0.338115	gb|ELT98936.1| hypothetical protein CAPTEDRAFT_165873, partial [Capitella teleta]	3e-145	69	86	0
comp2263667_c0_seq1_m.57601	0.808103	NA	0.896293	NA	0.913503	NA	gb|ELU03645.1| hypothetical protein CAPTEDRAFT_186204 [Capitella teleta]	1e-91	79	85	2
comp2263691_c0_seq2_m.57661	0.794436	1.06246	0.635304	0.658282	0.631874	0.749431	ref|XP_005090113.1| PREDICTED: glucosidase 2 subunit beta-like isoform X1 [Aplysia californica]	4e-146	47	62	3
comp2263787_c0_seq3_m.57874	0.910574	0.563923	1.02284	1.01266	1.04535	1.02416	NA	NA	NA	NA	NA
comp2263873_c0_seq9_m.58029	5.91631	4.29603	7.72663	3.92798	7.58771	2.38999	ref|XP_009058449.1| hypothetical protein LOTGIDRAFT_233585 [Lottia gigantea] gb|ESO90793.1| hypothetical protein LOTGIDRAFT_233585 [Lottia gigantea]	3e-08	29	44	11
comp2263921_c0_seq2_m.58101	0.282461	NA	0.417253	NA	0.338532	NA	gb|ELU04271.1| hypothetical protein CAPTEDRAFT_221804 [Capitella teleta]	4e-14	33	46	11
comp2263928_c0_seq2_m.58107	1.95923	2.2318	1.94919	1.8442	2.12971	1.62601	gb|AIZ77505.1| legumain-protease-precursor [Platynereis dumerilii]	0	99	100	0
comp2263950_c0_seq2_m.58147	3.47316	2.85521	3.76835	3.46305	4.68328	3.64929	dbj|BAA09580.1| linker chain L2 of the extracellular giant hemoglobin [Hediste diversicolor]	1e-125	76	89	0
comp2264068_c0_seq1_m.58373	1.11632	1.30273	1.09705	1.13039	1.03833	1.18019	gb|ELU03765.1| hypothetical protein CAPTEDRAFT_170278 [Capitella teleta]	0	75	86	0
comp2264121_c0_seq1_m.58459	0.601901	NA	0.77493	NA	0.833892	NA	ref|XP_009019765.1| hypothetical protein HELRODRAFT_188672 [Helobdella robusta] gb|ESO02357.1| hypothetical protein HELRODRAFT_188672 [Helobdella robusta]	1e-52	46	61	4
comp2264302_c0_seq2_m.58699	1.90025	1.78923	1.23986	1.0606	1.36928	1.27122	gb|ACY92666.1| tectonic-like protein [Saccoglossus kowalevskii]	1e-130	39	58	4
comp2264796_c2_seq1_m.59361	6.98324	5.43816	5.98772	5.20082	6.70961	5.51593	ref|XP_002613574.1| hypothetical protein BRAFLDRAFT_119799 [Branchiostoma floridae] gb|EEN69583.1| hypothetical protein BRAFLDRAFT_119799 [Branchiostoma floridae]	1e-79	72	83	0
comp2265326_c0_seq3_m.60204	4.39213	3.56273	4.79674	5.17013	4.94517	3.97598	ref|XP_009094533.1| PREDICTED: fatty acid-binding protein, intestinal [Serinus canaria]	5e-09	35	50	6
comp2265386_c0_seq2_m.60299	1.92609	1.41696	1.91133	1.95742	2.18687	1.76883	gb|ELT97538.1| hypothetical protein CAPTEDRAFT_176086 [Capitella teleta]	6e-27	32	54	4
comp2265494_c0_seq1_m.60519	0.914448	0.66517	0.987836	0.942458	1.11739	0.751772	gb|ELT96308.1| hypothetical protein CAPTEDRAFT_153835 [Capitella teleta]	2e-120	96	99	0
comp2265703_c0_seq1_m.60844	1.49871	1.13418	1.11186	0.782902	1.14163	0.833137	ref|XP_014767700.1| PREDICTED: THO complex subunit 4-like isoform X2 [Octopus bimaculoides] gb|KOF95182.1| hypothetical protein OCBIM_22039276mg [Octopus bimaculoides]	2e-47	67	80	3
comp2265768_c0_seq2_m.60943	2.64643	2.02021	1.60538	1.11934	1.65925	1.29671	ref|XP_013068105.1| PREDICTED: Y-box factor homolog [Biomphalaria glabrata]	3e-47	88	91	4
comp2265897_c0_seq5_m.61166	1.32654	1.82253	1.55763	1.41279	1.61677	1.36713	ref|XP_014789608.1| PREDICTED: ras-related protein Ral-A-like isoform X2 [Octopus bimaculoides] gb|KOF63349.1| hypothetical protein OCBIM_22019372mg [Octopus bimaculoides]	3e-107	80	87	3
comp2266005_c0_seq5_m.61322	0.169255	0.202921	0.234821	0.169479	0.199171	0.177808	ref|XP_013402700.1| PREDICTED: prolyl 4-hydroxylase subunit alpha-1-like [Lingula anatina]	0	54	69	2
comp2266507_c0_seq10_m.62138	9.21798	5.9682	6.29096	4.56223	5.83125	5.12778	pdb|1L3K|A Chain A, Up1, The Two Rna-Recognition Motif Domain Of Hnrnp A1 pdb|1U1K|A Chain A, Crystal Structure Of Up1 Complexed With D(Ttagggtt 7da Ggg); A Human Telomeric Repeat Containing 7-Deaza-A	9e-85	68	84	1
comp2266512_c0_seq8_m.62145	0.936131	0.66307	0.850379	0.734962	0.98843	0.744596	gb|ELT88138.1| hypothetical protein CAPTEDRAFT_221183 [Capitella teleta]	2e-22	53	75	2
comp2266675_c0_seq1_m.62468	1.36221	1.7496	1.6089	1.79755	1.55914	1.90945	ref|XP_013384261.1| PREDICTED: NADPH-dependent aldehyde reductase ARI1-like isoform X1 [Lingula anatina] ref|XP_013384264.1| PREDICTED: NADPH-dependent aldehyde reductase ARI1-like isoform X1 [Lingula	5e-151	62	80	1
comp2267172_c0_seq1_m.63318	0.937003	1.42295	1.4611	1.72785	1.31014	1.40968	ref|XP_014789676.1| PREDICTED: actin-related protein 2/3 complex subunit 4 [Octopus bimaculoides] gb|KOF63267.1| hypothetical protein OCBIM_22019751mg [Octopus bimaculoides]	1e-106	93	98	0
comp2267341_c0_seq1_m.63653	8.15088	7.40474	6.78241	5.05213	7.15914	5.77937	ref|XP_013386384.1| PREDICTED: fatty acid-binding protein, heart-like [Lingula anatina]	7e-38	57	72	2
comp2267634_c0_seq2_m.64174	3.60707	2.05248	2.58737	2.1156	2.64301	2.03343	NA	NA	NA	NA	NA
comp2267732_c0_seq2_m.64331	8.04015	4.92427	4.9115	3.94801	5.17889	4.3411	ref|XP_009021122.1| hypothetical protein HELRODRAFT_175454 [Helobdella robusta] gb|ESO00951.1| hypothetical protein HELRODRAFT_175454 [Helobdella robusta]	4e-45	56	71	0
comp2268029_c2_seq11_m.64856	3.10139	4.00368	3.20489	4.28651	3.19196	5.65342	gb|KFM60178.1| putative uncharacterized oxidoreductase, partial [Stegodyphus mimosarum]	4e-95	51	69	0
comp2268046_c1_seq1_m.64874	2.2884	1.79206	2.16756	1.98258	2.25218	1.95398	ref|XP_014772558.1| PREDICTED: 26S protease regulatory subunit 4 [Octopus bimaculoides] gb|KOF88247.1| hypothetical protein OCBIM_22015142mg [Octopus bimaculoides]	0	96	98	0
comp2268225_c0_seq5_m.65245	1.31814	0.855603	1.56265	1.24244	1.79477	1.17045	gb|ELU16345.1| hypothetical protein CAPTEDRAFT_221115 [Capitella teleta]	8e-54	69	84	0
comp2268336_c0_seq2_m.65472	1.49341	1.62557	1.32559	1.44929	1.347	1.53698	ref|WP_049491992.1| peptidase M26 [Streptococcus pseudopneumoniae]	4e-09	31	42	25
comp2268336_c1_seq1_m.65474	1.4067	1.41352	1.35109	1.63557	1.34244	1.51344	dbj|BAE93516.1| regeneration-upregulated protein 5 [Enchytraeus japonensis]	3e-24	32	58	4
comp2268798_c0_seq2_m.66233	1.41729	2.05975	2.14768	2.76616	1.94037	2.585	gb|ELT95603.1| hypothetical protein CAPTEDRAFT_180307 [Capitella teleta]	0	80	90	1
comp2268869_c0_seq6_m.66344	3.30354	2.27122	6.12636	4.93448	5.92658	3.90304	ref|XP_009065264.1| hypothetical protein LOTGIDRAFT_229628 [Lottia gigantea] gb|ESO84138.1| hypothetical protein LOTGIDRAFT_229628 [Lottia gigantea]	2e-07	27	42	9
comp2268892_c0_seq1_m.66381	8.69381	5.51248	6.1056	5.04414	7.12574	5.57726	gb|ELU04261.1| hypothetical protein CAPTEDRAFT_171595 [Capitella teleta]	2e-17	41	62	7
comp2268906_c0_seq4_m.66401	10.3975	7.4414	11.4307	10.826	11.3498	10.6035	gb|ELU02124.1| hypothetical protein CAPTEDRAFT_154247 [Capitella teleta]	7e-138	60	76	1
comp2268964_c0_seq1_m.66515	2.52235	1.88668	2.32388	1.85209	2.72599	2.05387	gb|EPB79035.1| peptidyl-prolyl cis-trans isomerase, cyclophilin-type [Ancylostoma ceylanicum] gb|EYB84042.1| hypothetical protein Y032_0323g2468 [Ancylostoma ceylanicum]	3e-78	60	75	0
comp2269009_c0_seq1_m.66627	3.02965	2.76837	2.04638	1.6382	2.30661	1.99546	ref|XP_013388466.1| PREDICTED: probable calcium-binding protein CML10 [Lingula anatina]	1e-29	47	73	0
comp2269029_c1_seq11_m.66661	1.7988	1.37707	1.7225	1.46639	1.63107	1.36256	ref|XP_013781869.1| PREDICTED: LOW QUALITY PROTEIN: F-actin-capping protein subunit beta-like [Limulus polyphemus]	6e-164	85	92	0
comp2269230_c0_seq2_m.67055	6.78422	6.35792	6.05725	6.54403	5.85512	6.75137	ref|XP_002597653.1| hypothetical protein BRAFLDRAFT_77453 [Branchiostoma floridae] gb|EEN53665.1| hypothetical protein BRAFLDRAFT_77453 [Branchiostoma floridae]	9e-113	42	56	19
comp2269421_c0_seq7_m.67382	2.47754	1.77322	2.43903	2.29786	2.70543	2.30938	ref|XP_008559476.1| PREDICTED: microtubule-associated protein RP/EB family member 1 isoform X4 [Microplitis demolitor]	5e-89	55	70	3
comp2269580_c0_seq1_m.67656	1.752	1.54395	1.94131	1.70735	2.10723	1.61559	ref|XP_011437315.1| PREDICTED: ubiquitin-conjugating enzyme E2 N [Crassostrea gigas]	7e-87	91	95	0
comp2269738_c0_seq1_m.67939	1.51411	NA	1.38974	NA	1.32841	NA	NA	NA	NA	NA	NA
comp2269773_c0_seq6_m.68002	0.944203	1.23517	1.06523	1.22923	1.00694	1.2584	gb|ELU02654.1| hypothetical protein CAPTEDRAFT_223415 [Capitella teleta]	0	88	95	0
comp2269906_c0_seq2_m.68214	1.99197	1.27214	1.5498	1.19659	1.67424	1.08243	gb|ELT93347.1| hypothetical protein CAPTEDRAFT_181658 [Capitella teleta]	3e-89	64	80	0
comp2269987_c0_seq2_m.68354	1.60716	2.44547	2.73232	3.65943	2.29382	2.8566	gb|ELU07072.1| hypothetical protein CAPTEDRAFT_182829 [Capitella teleta]	0	83	93	0
comp2270148_c0_seq3_m.68661	5.45576	4.23491	4.66195	4.05411	5.10823	4.03701	ref|XP_009011217.1| hypothetical protein HELRODRAFT_167462 [Helobdella robusta] gb|ESO10948.1| hypothetical protein HELRODRAFT_167462 [Helobdella robusta]	1e-24	37	57	3
comp2270517_c0_seq1_m.69357	1.30214	1.48772	1.38174	1.45566	1.22803	1.47244	gb|EKC38959.1| DCC-interacting protein 13-alpha [Crassostrea gigas]	0	49	71	3
comp2270519_c0_seq1_m.69360	0.496685	NA	0.487409	NA	0.47819	NA	gb|ELU11155.1| hypothetical protein CAPTEDRAFT_224256 [Capitella teleta]	9e-50	42	59	5
comp2270576_c0_seq1_m.69463	0.936819	0.725559	1.60338	1.43463	1.40478	1.06627	gb|ELT92419.1| hypothetical protein CAPTEDRAFT_148966 [Capitella teleta]	5e-100	95	98	0
comp2270845_c1_seq1_m.69967	1.41056	1.23173	1.76228	2.25005	1.70089	2.16648	ref|XP_013398855.1| PREDICTED: serine/threonine-protein phosphatase 2A 56 kDa regulatory subunit epsilon isoform-like isoform X1 [Lingula anatina]	0	87	92	1
comp2270876_c0_seq2_m.70018	1.85584	1.89442	1.28014	1.02648	1.33304	1.11974	ref|XP_006815935.1| PREDICTED: lupus La protein homolog isoform X3 [Saccoglossus kowalevskii]	6e-81	49	70	1
comp2271225_c0_seq5_m.70641	53.0327	31.5399	36.7405	36.7278	49.4237	36.4813	gb|AAN63944.1| myosin essential light chain [Eisenia fetida]	5e-73	73	85	0
comp2271257_c1_seq1_m.70699	1.01229	NA	1.25363	NA	1.14421	NA	ref|XP_013401006.1| PREDICTED: nucleolar protein 58-like [Lingula anatina]	0	74	86	2
comp2271381_c1_seq12_m.70942	8.50228	7.57912	8.59737	8.46554	9.85848	8.46142	ref|XP_009027007.1| hypothetical protein HELRODRAFT_186024 [Helobdella robusta] gb|ESN94879.1| hypothetical protein HELRODRAFT_186024 [Helobdella robusta]	4e-86	72	86	0
comp2271419_c1_seq1_m.71009	0.116673	0.10515	0.16631	0.207063	0.169447	0.186021	gb|ELU06542.1| hypothetical protein CAPTEDRAFT_148285 [Capitella teleta]	0	53	71	1
comp2271594_c0_seq8_m.71451	0.765732	0.683658	0.511366	0.379108	0.509455	0.437553	NA	NA	NA	NA	NA
comp2271654_c0_seq4_m.71616	1.44404	1.77211	1.50258	1.5936	1.50854	1.66561	ref|XP_011441085.1| PREDICTED: 26S protease regulatory subunit 6B isoform X1 [Crassostrea gigas] gb|EKC24481.1| 26S protease regulatory subunit 6B [Crassostrea gigas]	0	92	95	0
comp2271675_c0_seq2_m.71655	0.261927	NA	0.552776	NA	0.345848	NA	NA	NA	NA	NA	NA
comp2271737_c1_seq2_m.71770	2.04673	6.19583	1.27647	1.74854	1.24191	1.66287	NA	NA	NA	NA	NA
comp2271802_c0_seq1_m.71876	1.5233	1.74024	1.41518	1.51034	1.314	1.53061	gb|EKC31891.1| Deleted in malignant brain tumors 1 protein [Crassostrea gigas]	7e-100	38	54	6
comp2271895_c0_seq9_m.72087	1.3202	1.59594	1.20035	1.62018	1.2332	1.35137	ref|XP_005090631.2| PREDICTED: phosphatidylinositol-binding clathrin assembly protein LAP-like [Aplysia californica]	4e-147	85	95	0
comp2271896_c0_seq2_m.72093	1.20695	1.27969	1.16125	1.27286	1.19276	1.40419	gb|ELT96035.1| hypothetical protein CAPTEDRAFT_163818 [Capitella teleta]	2e-99	56	77	1
comp2271909_c0_seq2_m.72111	1.42663	1.09666	1.24088	1.44322	1.23254	1.60578	gb|ELT90447.1| hypothetical protein CAPTEDRAFT_173223 [Capitella teleta]	2e-173	78	87	0
comp2271944_c0_seq11_m.72172	0.581921	1.03362	0.790001	1.11527	0.747125	1.2002	gb|KOF73592.1| hypothetical protein OCBIM_22037642mg [Octopus bimaculoides]	2e-45	71	80	9
comp2272087_c1_seq4_m.72458	3.31413	2.5385	2.9886	2.91777	3.20301	2.74179	ref|XP_009016114.1| hypothetical protein HELRODRAFT_77319 [Helobdella robusta] gb|ESO05481.1| hypothetical protein HELRODRAFT_77319 [Helobdella robusta]	1e-23	42	63	1
comp2272118_c0_seq11_m.72524	0.450783	0.572459	0.647859	0.853806	0.61984	0.763861	ref|XP_005104155.1| PREDICTED: atlastin-like isoform X2 [Aplysia californica]	0	59	77	2
comp2272378_c0_seq1_m.73076	5.14571	4.54491	5.12712	4.91051	5.58934	4.58819	gb|ELT92846.1| hypothetical protein CAPTEDRAFT_224067 [Capitella teleta]	0	80	88	0
comp2272433_c0_seq1_m.73197	0.633361	NA	0.809371	NA	0.80198	NA	ref|XP_002602065.1| hypothetical protein BRAFLDRAFT_228268 [Branchiostoma floridae] gb|EEN58077.1| hypothetical protein BRAFLDRAFT_228268 [Branchiostoma floridae]	0	58	75	0
comp2272437_c1_seq1_m.73204	0.877261	3.2461	0.600167	0.629202	0.5518	0.656168	NA	NA	NA	NA	NA
comp2272491_c1_seq4_m.73302	2.42211	3.21565	2.10054	2.27691	2.03286	2.51296	gb|ELT91752.1| hypothetical protein CAPTEDRAFT_173985 [Capitella teleta]	0	51	67	5
comp2272559_c0_seq1_m.73440	5.56774	3.84911	4.89472	4.08395	4.8919	3.9496	ref|XP_009009850.1| hypothetical protein HELRODRAFT_184873 [Helobdella robusta] gb|ESO13130.1| hypothetical protein HELRODRAFT_184873 [Helobdella robusta]	5e-69	59	79	0
comp2273142_c0_seq1_m.74744	1.0562	0.899787	0.79485	0.658235	0.826732	0.665118	ref|XP_014674120.1| PREDICTED: protein SET-like isoform X2 [Priapulus caudatus]	1e-104	75	83	2
comp2273190_c0_seq1_m.74828	0.928957	1.50817	0.999128	1.07149	0.923857	1.10472	gb|ELU14609.1| hypothetical protein CAPTEDRAFT_180564 [Capitella teleta]	0	75	87	0
comp2273193_c0_seq1_m.74830	5.45545	3.18007	3.92156	3.00082	4.81439	3.40216	emb|CDS28034.1| PDZ and LIM domain protein Zasp [Hymenolepis microstoma]	2e-39	41	58	7
comp2273204_c0_seq26_m.74869	4.02676	3.73626	3.81356	3.86818	3.60416	4.19671	gb|KOF64097.1| hypothetical protein OCBIM_22017780mg [Octopus bimaculoides]	2e-138	69	85	0
comp2273249_c0_seq4_m.74967	12.1183	12.6078	9.40821	9.46824	8.62385	10.3347	ref|XP_002593212.1| hypothetical protein BRAFLDRAFT_120140 [Branchiostoma floridae] gb|EEN49223.1| hypothetical protein BRAFLDRAFT_120140 [Branchiostoma floridae]	1e-21	36	50	12
comp2273257_c0_seq9_m.74986	10.34	9.37934	14.8504	14.0748	16.0142	10.2711	gb|KJB21638.1| hypothetical protein B456_004G005600 [Gossypium raimondii]	5e-45	83	90	0
comp2273417_c0_seq5_m.75297	2.81904	3.31273	1.96014	2.07204	2.00727	2.45696	ref|XP_013781083.1| PREDICTED: ubiquitin-associated protein 2-like isoform X2 [Limulus polyphemus]	3e-28	46	59	11
comp2273466_c0_seq2_m.75427	1.91594	1.65874	1.76258	1.55464	1.94092	1.60612	ref|XP_013396418.1| PREDICTED: zinc finger protein 622-like [Lingula anatina] ref|XP_013396419.1| PREDICTED: zinc finger protein 622-like [Lingula anatina] ref|XP_013396420.1| PREDICTED: zinc finger p	2e-135	54	70	2
comp2273576_c0_seq1_m.75622	0.409028	NA	0.512073	NA	0.497031	NA	gb|ELU04184.1| hypothetical protein CAPTEDRAFT_19821 [Capitella teleta]	0	67	82	0
comp2273628_c0_seq6_m.75728	0.83196	0.85268	0.647472	0.738672	0.661365	0.810625	gb|ELT87073.1| hypothetical protein CAPTEDRAFT_173451 [Capitella teleta]	4e-37	49	70	2
comp2273765_c1_seq6_m.76032	0.268658	0.36206	0.44423	0.635706	0.413898	0.580906	ref|XP_011427953.1| PREDICTED: synaptobrevin-like isoform X4 [Crassostrea gigas]	1e-32	89	96	0
comp2273900_c0_seq1_m.76336	1.07461	2.31411	1.02178	1.1227	1.00387	1.36264	ref|XP_013414827.1| PREDICTED: carboxypeptidase E-like [Lingula anatina]	2e-151	58	72	4
comp2273929_c1_seq1_m.76435	0.826975	NA	0.886031	NA	0.898748	NA	ref|XP_011437716.1| PREDICTED: 4-aminobutyrate aminotransferase, mitochondrial-like [Crassostrea gigas]	0	54	71	1
comp2274121_c0_seq4_m.76896	0.662391	1.08941	0.739911	0.852844	0.693122	0.763301	ref|XP_013405621.1| PREDICTED: poly(ADP-ribose) polymerase pme-5-like isoform X1 [Lingula anatina] ref|XP_013405622.1| PREDICTED: poly(ADP-ribose) polymerase pme-5-like isoform X2 [Lingula anatina]	0	35	54	12
comp2274137_c1_seq25_m.76929	2.38979	5.50104	1.76237	2.12632	1.63304	2.32785	NA	NA	NA	NA	NA
comp2274238_c3_seq9_m.77182	1.87371	1.17844	1.66407	1.64749	1.66234	1.77435	gb|ELU02931.1| hypothetical protein CAPTEDRAFT_154976 [Capitella teleta]	3e-88	61	69	13
comp2274246_c0_seq1_m.77191	1.96609	1.89769	1.63849	1.7348	1.56426	1.79843	ref|XP_009054824.1| hypothetical protein LOTGIDRAFT_189289 [Lottia gigantea] gb|ESO94545.1| hypothetical protein LOTGIDRAFT_189289 [Lottia gigantea]	2e-138	78	89	0
comp2274262_c0_seq1_m.77231	0.536699	NA	0.638054	NA	0.647197	NA	ref|XP_013409580.1| PREDICTED: LOW QUALITY PROTEIN: coiled-coil and C2 domain-containing protein 1-like [Lingula anatina]	0	49	65	6
comp2274413_c0_seq1_m.77564	0.44725	NA	0.640398	NA	0.684212	NA	ref|XP_013403660.1| PREDICTED: CKLF-like MARVEL transmembrane domain-containing protein 4 [Lingula anatina] ref|XP_013403661.1| PREDICTED: CKLF-like MARVEL transmembrane domain-containing protein 4 [L	5e-16	54	70	2
comp2274474_c0_seq5_m.77718	2.21795	1.31833	1.39786	1.06764	1.4077	1.05542	ref|XP_014774568.1| PREDICTED: protein SET-like [Octopus bimaculoides] gb|KOF99580.1| hypothetical protein OCBIM_22014847mg [Octopus bimaculoides]	1e-120	88	93	0
comp2274517_c0_seq1_m.77807	8.6303	9.86273	10.2627	11.9165	9.56745	10.5957	gb|ELU02469.1| hypothetical protein CAPTEDRAFT_220779 [Capitella teleta]	0	44	65	1
comp2274537_c0_seq28_m.77857	0.924371	NA	0.803114	NA	0.755866	NA	gb|AIZ77503.1| enteropeptidase [Platynereis dumerilii]	1e-114	43	60	8
comp2274783_c0_seq9_m.78326	12.8902	9.15468	12.0336	14.0386	13.0184	13.4357	gb|ELU09307.1| hypothetical protein CAPTEDRAFT_170392 [Capitella teleta]	1e-171	83	92	0
comp2275027_c0_seq1_m.78898	3.50778	4.01054	3.77544	4.24756	3.70235	4.42823	gb|ELU02181.1| hypothetical protein CAPTEDRAFT_218806 [Capitella teleta]	0	70	84	0
comp2275191_c0_seq1_m.79281	2.08115	2.03197	2.62526	3.03642	2.61047	2.65677	gb|ELU06197.1| hypothetical protein CAPTEDRAFT_162690 [Capitella teleta]	4e-113	70	81	2
comp2275266_c0_seq21_m.79421	1.60731	1.43218	1.35612	1.40395	1.3516	1.56702	ref|XP_013397487.1| PREDICTED: kinesin light chain-like isoform X10 [Lingula anatina]	0	81	90	1
comp2275445_c0_seq2_m.79869	3.38639	2.20593	2.55997	2.60145	2.6004	2.62084	ref|XP_013411035.1| PREDICTED: thioredoxin domain-containing protein 5-like [Lingula anatina]	2e-120	48	62	3
comp2275457_c1_seq8_m.79890	3.03816	3.88145	3.53734	4.10389	3.32043	3.77665	ref|XP_013081407.1| PREDICTED: collagen alpha-3(VI) chain-like isoform X7 [Biomphalaria glabrata]	6e-74	26	43	10
comp2275478_c0_seq7_m.79935	2.71165	3.9219	3.5295	3.85441	3.17259	3.89902	gb|ELU08772.1| hypothetical protein CAPTEDRAFT_165363 [Capitella teleta]	0	77	85	2
comp2275616_c0_seq2_m.80253	0.622099	0.591901	0.810515	0.67459	0.642441	0.675934	ref|XP_012329874.1| PREDICTED: glutamate receptor 4 isoform X3 [Aotus nancymaae]	5e-68	32	53	10
comp2275701_c1_seq1_m.80440	0.615444	1.25317	1.13028	1.0939	1.02669	1.15127	gb|AFQ02695.1| bactericidal permeability-increasing protein/lipopolysaccharide-binding protein [Scapharca broughtonii]	1e-44	28	49	4
comp2275833_c0_seq1_m.80771	0.73849	0.854647	0.657433	0.643741	0.589511	0.734413	gb|EFX74841.1| hypothetical protein DAPPUDRAFT_306984 [Daphnia pulex]	0	57	73	1
comp2275893_c0_seq1_m.80933	1.79559	2.99243	1.09381	1.01627	0.977732	1.09798	sp|P30754.2|CAFF_RIFPA RecName: Full=Fibril-forming collagen alpha chain	2e-14	60	69	0
comp2275974_c0_seq18_m.81146	0.65169	0.947307	0.758343	0.92681	0.735506	0.976499	gb|ELU13574.1| hypothetical protein CAPTEDRAFT_6610 [Capitella teleta]	2e-38	89	98	0
comp2276031_c0_seq51_m.81297	1.26997	NA	1.12673	NA	1.22567	NA	gb|ELU04990.1| hypothetical protein CAPTEDRAFT_200421 [Capitella teleta]	3e-109	58	69	11
comp2276173_c0_seq1_m.81727	1.00202	2.00247	1.13646	1.30305	1.17734	1.33252	ref|XP_014772440.1| PREDICTED: apoptosis-inducing factor 1, mitochondrial-like [Octopus bimaculoides] gb|KOF99861.1| hypothetical protein OCBIM_22010376mg [Octopus bimaculoides]	0	67	80	1
comp2276277_c0_seq18_m.81972	1.36559	1.83816	1.42899	1.61403	1.32413	1.75879	ref|XP_014664750.1| PREDICTED: uncharacterized protein LOC106807044 isoform X4 [Priapulus caudatus]	9e-97	34	52	5
comp2276295_c0_seq1_m.82012	0.0751485	NA	0.0672103	NA	0.0550952	NA	ref|XP_012943807.1| PREDICTED: uncharacterized protein LOC101853496 isoform X14 [Aplysia californica]	2e-78	36	57	13
comp2276377_c0_seq2_m.82218	0.623498	0.893663	0.661179	0.62728	0.60287	0.605015	gb|ELT89721.1| hypothetical protein CAPTEDRAFT_175992 [Capitella teleta]	2e-139	82	91	1
comp2276461_c0_seq7_m.82444	0.522722	0.657357	0.554685	0.613571	0.465609	0.599459	ref|XP_009052399.1| hypothetical protein LOTGIDRAFT_231708 [Lottia gigantea] gb|ESO96904.1| hypothetical protein LOTGIDRAFT_231708 [Lottia gigantea]	9e-14	26	48	6
comp2276668_c0_seq1_m.83017	0.611053	1.00901	0.421348	0.531927	0.408119	0.594783	ref|XP_014787226.1| PREDICTED: YTH domain-containing family protein 2-like isoform X2 [Octopus bimaculoides] gb|KOF67749.1| hypothetical protein OCBIM_22008891mg [Octopus bimaculoides]	3e-150	57	65	12
comp2276747_c1_seq2_m.83192	0.54686	NA	0.647531	NA	0.647821	NA	ref|XP_013384176.1| PREDICTED: methionine--tRNA ligase, cytoplasmic-like, partial [Lingula anatina]	9e-26	35	55	4
comp2276936_c0_seq3_m.83786	10.7652	12.5769	13.3551	13.0989	14.9596	9.21698	sp|P30757.2|H2B_SIPNU RecName: Full=Histone H2B	9e-56	100	100	0
comp2276966_c0_seq13_m.83854	3.05961	3.33479	2.79145	2.35343	2.75899	2.55003	gb|EKC33829.1| Methenyltetrahydrofolate synthetase domain-containing protein [Crassostrea gigas]	2e-95	67	81	0
comp2277083_c0_seq3_m.84173	0.415677	NA	0.428702	NA	0.420275	NA	gb|ELU02771.1| hypothetical protein CAPTEDRAFT_215553 [Capitella teleta]	0	37	54	6
comp2277132_c1_seq1_m.84335	0.381738	NA	0.443389	NA	0.435598	NA	ref|XP_006818011.1| PREDICTED: vesicle-fusing ATPase-like, partial [Saccoglossus kowalevskii]	2e-66	56	72	4
comp2277176_c0_seq2_m.84466	1.94331	1.90914	2.28711	2.42139	1.91952	2.22709	gb|ELU16324.1| hypothetical protein CAPTEDRAFT_192434 [Capitella teleta]	5e-131	26	45	10
comp2277243_c0_seq1_m.84667	3.22215	3.6968	3.09216	3.52568	2.96386	3.54483	gb|ELT91503.1| hypothetical protein CAPTEDRAFT_172041 [Capitella teleta]	5e-160	52	72	0
comp2277317_c0_seq1_m.84875	1.55706	2.46502	1.60143	1.87881	1.53704	1.96783	gb|ELU05671.1| hypothetical protein CAPTEDRAFT_229021 [Capitella teleta]	0	45	67	1
comp2277337_c0_seq4_m.84929	1.1324	1.22819	1.24394	1.60139	1.17119	1.49001	ref|XP_013386143.1| PREDICTED: putative serine protease K12H4.7 [Lingula anatina]	8e-107	70	81	0
comp2277680_c0_seq25_m.86056	0.431231	0.59957	0.347334	0.318833	0.328602	0.399193	gb|KOF93175.1| hypothetical protein OCBIM_22004947mg [Octopus bimaculoides]	5e-153	54	72	3
comp2277951_c0_seq2_m.87004	0.31228	0.469633	0.375118	0.498171	0.368268	0.512327	ref|XP_013412809.1| PREDICTED: dynactin subunit 1-like isoform X4 [Lingula anatina]	0	59	77	2
comp2277977_c1_seq3_m.87126	2.85506	2.01672	2.87523	2.64345	2.75023	2.14249	ref|XP_011417588.1| PREDICTED: GDP-mannose 4,6 dehydratase-like isoform X2 [Crassostrea gigas]	0	79	91	0
comp2278037_c0_seq3_m.87323	0.146312	0.212998	0.168833	0.217353	0.150039	0.208364	ref|XP_012943808.1| PREDICTED: uncharacterized protein LOC101853496 isoform X15 [Aplysia californica]	1e-145	36	57	4
comp2278100_c0_seq14_m.87565	1.02362	1.17351	1.03325	1.04797	0.980297	1.16449	ref|XP_013065978.1| PREDICTED: myelin expression factor 2-like isoform X2 [Biomphalaria glabrata]	7e-42	66	81	3
comp2278161_c0_seq3_m.87805	0.538423	0.692751	0.618391	0.727344	0.628026	0.789496	ref|XP_013406955.1| PREDICTED: xanthine dehydrogenase-like isoform X1 [Lingula anatina] ref|XP_013406956.1| PREDICTED: xanthine dehydrogenase-like isoform X1 [Lingula anatina]	0	43	62	2
comp2278234_c1_seq4_m.88159	1.83515	2.26337	1.81551	2.12729	1.74516	1.90789	gb|ELT93984.1| hypothetical protein CAPTEDRAFT_152534 [Capitella teleta]	0	67	85	3
comp2278238_c0_seq6_m.88188	0.66055	0.582092	0.78809	0.879243	0.760349	0.869386	ref|XP_013420266.1| PREDICTED: rap guanine nucleotide exchange factor 1-like isoform X3 [Lingula anatina]	4e-164	53	65	9
comp2278238_c1_seq2_m.88191	1.83181	1.70789	1.66858	1.42776	1.63027	1.3519	gb|ELT91292.1| hypothetical protein CAPTEDRAFT_150412 [Capitella teleta]	0	73	88	2
comp2278333_c0_seq10_m.88591	2.31842	NA	1.81418	NA	1.78957	NA	gb|KOF82695.1| hypothetical protein OCBIM_22024891mg [Octopus bimaculoides]	1e-113	81	88	4
comp2278377_c0_seq3_m.88774	1.07773	1.87698	1.10965	1.34055	1.07811	1.2237	gb|ELU17115.1| hypothetical protein CAPTEDRAFT_183991 [Capitella teleta]	0	54	73	0
comp2278390_c0_seq1_m.88826	0.614709	NA	0.686027	NA	0.686034	NA	gb|ELT93339.1| hypothetical protein CAPTEDRAFT_157479 [Capitella teleta]	0	44	63	5
comp2278433_c0_seq2_m.89062	0.285911	0.358069	0.309314	0.335521	0.285324	0.363132	gb|ELU14775.1| hypothetical protein CAPTEDRAFT_226653 [Capitella teleta]	0	35	51	9
comp2278485_c0_seq1_m.89374	1.46324	0.859652	1.65186	1.34537	1.56627	1.23584	gb|ELU14385.1| hypothetical protein CAPTEDRAFT_224867 [Capitella teleta]	0	52	70	4
comp2278554_c0_seq4_m.90013	14.4769	14.0711	12.096	12.3603	11.7018	12.9508	ref|XP_009010258.1| hypothetical protein HELRODRAFT_166807 [Helobdella robusta] gb|ESO11770.1| hypothetical protein HELRODRAFT_166807 [Helobdella robusta]	1e-19	37	56	12
comp2278630_c0_seq8_m.90809	3.13666	4.33269	2.48891	2.64729	2.44054	3.02742	gb|ELU01871.1| hypothetical protein CAPTEDRAFT_220753 [Capitella teleta]	0	49	68	2
comp2279235_c0_seq1_m.91078	1.59989	1.34463	1.26734	1.08	1.36973	1.10406	gb|ELT96049.1| hypothetical protein CAPTEDRAFT_223820 [Capitella teleta]	2e-14	38	48	0
comp2279445_c0_seq1_m.91120	1.9939	1.24902	2.12852	1.81822	2.1403	1.86327	ref|XP_013782205.1| PREDICTED: glutathione peroxidase 7-like [Limulus polyphemus]	6e-46	54	69	1
comp2279748_c0_seq1_m.91174	0.960429	1.47551	0.980228	0.898876	1.06233	0.965158	ref|XP_009025362.1| hypothetical protein HELRODRAFT_163156 [Helobdella robusta] gb|ESN96126.1| hypothetical protein HELRODRAFT_163156 [Helobdella robusta]	1e-51	76	84	0
comp2279773_c0_seq1_m.91181	11.9888	10.918	11.016	9.39813	11.8692	10.1814	gb|EFX71844.1| hypothetical protein DAPPUDRAFT_326737 [Daphnia pulex]	5e-146	91	96	0
comp2280536_c0_seq1_m.91231	1.2401	NA	1.13432	NA	1.23416	NA	ref|XP_002998616.1| calmodulin [Phytophthora infestans T30-4] ref|XP_008607073.1| calmodulin [Saprolegnia diclina VS20] ref|XP_008908788.1| calmodulin [Phytophthora parasitica INRA-310] ref|XP_0095399	3e-54	66	80	0
comp2280591_c0_seq1_m.91233	2.64999	1.57549	3.87301	3.40131	5.21566	3.23427	sp|P13578.1|GLB3_TYLHE RecName: Full=Extracellular globin-2B; AltName: Full=Erythrocruorin; AltName: Full=Extracellular globin IIB	7e-76	76	89	0
comp2280694_c0_seq1_m.91236	3.19553	1.71547	3.12278	3.08634	4.64884	2.90488	sp|P02220.1|GLB4_TYLHE RecName: Full=Extracellular globin-2C; AltName: Full=Erythrocruorin; AltName: Full=Extracellular globin IIC	2e-67	70	83	0
comp2281676_c0_seq1_m.91255	1.73836	1.33038	2.56224	2.55118	3.07669	2.02674	sp|P09966.1|GLB2_TYLHE RecName: Full=Extracellular globin-2A; AltName: Full=Erythrocruorin; AltName: Full=Globin IIA	4e-78	80	89	0
gnl_Pdu_trscr_assembly_1_11607_m.26425	0.136078	NA	0.200698	NA	0.185542	NA	NA	NA	NA	NA	NA
gnl_Pdu_trscr_assembly_1_1213_m.70099	22.069	15.0737	18.7193	16.7048	19.6432	15.8178	NA	NA	NA	NA	NA
gnl_Pdu_trscr_assembly_1_15577_m.47320	2.9346	2.62845	3.05507	2.75004	3.09749	2.70856	NA	NA	NA	NA	NA
gnl_Pdu_trscr_assembly_1_1644_m.62862	0.656564	0.845603	0.677107	0.725807	0.618944	0.761921	NA	NA	NA	NA	NA
gnl_Pdu_trscr_assembly_1_17807_m.62055	1.18399	0.898676	1.41855	1.31758	1.40076	1.08155	NA	NA	NA	NA	NA
gnl_Pdu_trscr_assembly_1_1797_m.38383	1.10956	1.12195	1.30694	1.36996	1.22862	1.35356	NA	NA	NA	NA	NA
gnl_Pdu_trscr_assembly_1_18157_m.24773	1.08652	1.29104	1.21406	1.12468	1.36986	1.00842	NA	NA	NA	NA	NA
gnl_Pdu_trscr_assembly_1_200732_m.91056	3.24436	7.56068	2.2855	2.31546	2.16429	2.46887	NA	NA	NA	NA	NA
gnl_Pdu_trscr_assembly_1_326_m.78835	18.3776	14.6484	17.8071	15.7638	16.8796	15.7355	NA	NA	NA	NA	NA
gnl_Pdu_trscr_assembly_1_3867_m.65412	0.976019	2.04787	2.3644	3.21227	2.22692	3.34633	NA	NA	NA	NA	NA
gnl_Pdu_trscr_assembly_1_4228_m.63259	0.811756	NA	0.589191	NA	0.557657	NA	NA	NA	NA	NA	NA
gnl_Pdu_trscr_assembly_1_998_m.15062	13.6152	10.1763	7.9094	7.01302	8.77926	6.6875	NA	NA	NA	NA	NA
isotig10568_m.92324	8.4643	4.02569	6.06782	4.35853	6.97326	4.42669	ref|XP_013400827.1| PREDICTED: mammalian ependymin-related protein 1-like isoform X1 [Lingula anatina]	2e-05	31	51	5
tuba_m.92505	12.806	13.4328	16.7699	12.1579	14.7431	11.4209	ref|XP_002019473.1| GL12416 [Drosophila persimilis] gb|EDW38107.1| GL12416 [Drosophila persimilis]	0	98	99	0
