# Supplementary material for: Combined transcriptome and proteome profiling reveals specific molecular brain signatures for sex, maturation and circalunar clock phase
Source: eLife. 2019 Feb 15;8:e41556. doi: 10.7554/eLife.41556 (PMC6377233; doi:10.7554/eLife.41556)
Supplement: Figure 4—source data 1. — This file contains the qRT-PCR expression values of the candidate genes relative to the expression of the arithmetic mean of the reference genes sams and cdc5. Each gene is contained in a separate tab. [file elife-41556-fig4-data1.xlsx]

## Sheet: fabp
sample	expression
IM_NM	1.02664
IM_NM	7.3811
IM_NM	2.80809
IM_NM	3.86053
IM_NM	2.12464
IM_NM	0.796731
PM_NM_Female	6.87365
PM_NM_Female	2.40473
PM_NM_Female	2.32681
PM_NM_Female	1.4187
PM_NM_Female	3.35915
PM_NM_Female	3.70157
PM_NM_Male	3.40218
PM_NM_Male	2.04092
PM_NM_Male	1.19696
PM_NM_Male	3.31795
PM_NM_Male	0.338373
PM_NM_Male	0.444131
M_NM_Female	0.167224
M_NM_Female	0.0176831
M_NM_Female	0.000678507
M_NM_Female	0.0033957
M_NM_Female	0.00670686
M_NM_Female	0.0282734
M_NM_Male	0.0118815
M_NM_Male	0.011846
M_NM_Male	0.00448404
M_NM_Male	0.0141851
M_NM_Male	0.00479054
M_NM_Male	0.00477263

## Sheet: qpeptin
sample	expression
IM_NM	1.32823
IM_NM	2.2499
IM_NM	2.36718
IM_NM	1.27464
IM_NM	0.757236
IM_NM	0.481087
PM_NM_Female	2.89445
PM_NM_Female	1.25908
PM_NM_Female	3.54924
PM_NM_Female	1.86774
PM_NM_Female	1.70426
PM_NM_Female	2.39709
PM_NM_Male	2.56541
PM_NM_Male	3.75639
PM_NM_Male	3.90894
PM_NM_Male	1.80588
PM_NM_Male	2.65097
PM_NM_Male	1.06711
M_NM_Female	0.290302
M_NM_Female	0.360501
M_NM_Female	0.430829
M_NM_Female	0.635192
M_NM_Female	0.93475
M_NM_Female	0
M_NM_Male	0.696405
M_NM_Male	0.674084
M_NM_Male	0.427498
M_NM_Male	0.871485
M_NM_Male	0.31251
M_NM_Male	1.06499

## Sheet: dmrt1-2
sample	expression
IM_NM	0.0996195
IM_NM	0.260001
IM_NM	0.235492
IM_NM	0.302209
IM_NM	0.0514419
IM_NM	0.092
PM_NM_Female	0.00666125
PM_NM_Female	0.00927847
PM_NM_Female	0.0250826
PM_NM_Female	0.00410269
PM_NM_Female	0.00779361
PM_NM_Female	0.00871261
PM_NM_Male	0.928629
PM_NM_Male	0.477116
PM_NM_Male	0.53877
PM_NM_Male	0.634923
PM_NM_Male	0.58991
PM_NM_Male	0.240532
M_NM_Female	0.00472665
M_NM_Female	0.00974872
M_NM_Female	0.00756661
M_NM_Female	0.0124947
M_NM_Female	0
M_NM_Female	0
M_NM_Male	0.333722
M_NM_Male	0.807417
M_NM_Male	0.848047
M_NM_Male	1.29898
M_NM_Male	0.223696
M_NM_Male	1.72197

## Sheet: sten
sample	expression
IM_NM	0
IM_NM	0
IM_NM	0
IM_NM	0
IM_NM	0
IM_NM	0.000859779
PM_NM_Female	0.000356485
PM_NM_Female	0.000725631
PM_NM_Female	0
PM_NM_Female	0.000348961
PM_NM_Female	0.000303868
PM_NM_Female	0
PM_NM_Male	0
PM_NM_Male	0
PM_NM_Male	0.00125576
PM_NM_Male	0
PM_NM_Male	0
PM_NM_Male	0
M_NM_Female	2.88044
M_NM_Female	1.9725
M_NM_Female	2.70276
M_NM_Female	1.4902
M_NM_Female	1.32469
M_NM_Female	0
M_NM_Male	14.7182
M_NM_Male	12.9533
M_NM_Male	9.42887
M_NM_Male	3.24937
M_NM_Male	2.59379
M_NM_Male	21.7569

## Sheet: ralDH
sample	expression
IM_NM	0.6773
IM_NM	1.1591
IM_NM	0.8425
IM_NM	0.9842
IM_NM	0.2976
IM_NM	0.6228
PM_NM_Female	0.5324
PM_NM_Female	0.5256
PM_NM_Female	0.9248
PM_NM_Female	0.0195
PM_NM_Female	0.3737
PM_NM_Female	0.409
PM_NM_Male	0.5656
PM_NM_Male	1.1781
PM_NM_Male	0.9314
PM_NM_Male	0.3076
PM_NM_Male	1.8715
PM_NM_Male	0.7189
M_NM_Female	0.0369
M_NM_Female	0.0591
M_NM_Female	0.1499
M_NM_Female	0.0749
M_NM_Female	0.3171
M_NM_Female	0.0362
M_NM_Male	0.0698
M_NM_Male	0.0608
M_NM_Male	0.0398
M_NM_Male	0.1495
M_NM_Male	0.0774
M_NM_Male	0.1022

## Sheet: mmp1-14
sample	expression
IM_NM	0.0017428
IM_NM	0.00143292
IM_NM	0.000778012
IM_NM	0.0011869
IM_NM	0.00208477
IM_NM	0.000384219
PM_NM_Female	0.000801329
PM_NM_Female	0.00149116
PM_NM_Female	0.00409337
PM_NM_Female	0.00119649
PM_NM_Female	0.000539936
PM_NM_Female	0.000572714
PM_NM_Male	0.00127635
PM_NM_Male	0.00185213
PM_NM_Male	0.00223311
PM_NM_Male	0.00032735
PM_NM_Male	0.00261112
PM_NM_Male	0.00222137
M_NM_Female	68.9098
M_NM_Female	0.109069
M_NM_Female	10.0616
M_NM_Female	363.026
M_NM_Female	1.54602
M_NM_Female	0.52243
M_NM_Male	1.25431
M_NM_Male	0.763515
M_NM_Male	15.5759
M_NM_Male	39.4174
M_NM_Male	112.81
M_NM_Male	15.3674

## Sheet: cyp46
sample	expression
IM_NM	0.207841
IM_NM	0.0952147
IM_NM	0.0044441
IM_NM	0.0934443
IM_NM	0.182429
IM_NM	0.0835174
PM_NM_Female	0.152358
PM_NM_Female	0.373921
PM_NM_Female	0.465843
PM_NM_Female	0.0946019
PM_NM_Female	0.175384
PM_NM_Female	0.126097
PM_NM_Male	0.266414
PM_NM_Male	0.233894
PM_NM_Male	0.530638
PM_NM_Male	0.117402
PM_NM_Male	0.492299
PM_NM_Male	0.380795
M_NM_Female	1.00016
M_NM_Female	0.203822
M_NM_Female	0.37943
M_NM_Female	0.702967
M_NM_Female	1.53007
M_NM_Female	1.35866
M_NM_Male	0.0492295
M_NM_Male	0.39881
M_NM_Male	0.1089
M_NM_Male	0.171175
M_NM_Male	0.0909187
M_NM_Male	0.200532

## Sheet: erp4.9
sample	expression
IM_NM	0.650101
IM_NM	0.0864051
IM_NM	0.633913
IM_NM	1.6109
IM_NM	0.798095
IM_NM	2.92227
IM_FRFM	0.0409384
IM_FRFM	1.32504
IM_FRFM	1.06361
IM_FRFM	1.3585
IM_FRFM	4.22716
IM_FRFM	9.5853
PM_NM_Female	0.0379793
PM_NM_Female	1.01159
PM_NM_Female	0.196279
PM_NM_Female	4.47099
PM_NM_Female	1.52222
PM_NM_Female	2.29594
PM_FRFM_Female	0.189419
PM_FRFM_Female	1.60363
PM_FRFM_Female	1.39775
PM_FRFM_Female	0.948211
PM_FRFM_Female	1.53138
PM_FRFM_Female	1.8707
PM_NM_Male	3.42981
PM_NM_Male	0.0711273
PM_NM_Male	0.116593
PM_NM_Male	0.607575
PM_NM_Male	1.99414
PM_NM_Male	2.03582
PM_FRFM_Male	0.408734
PM_FRFM_Male	0.0637183
PM_FRFM_Male	0.00784939
PM_FRFM_Male	2.38958
PM_FRFM_Male	0.463295
PM_FRFM_Male	2.01929
M_NM_Female	0.00257169
M_NM_Female	0.00223343
M_NM_Female	0
M_NM_Female	0
M_NM_Female	0
M_NM_Female	0.0301504
M_NM_Male	0
M_NM_Male	0
M_NM_Male	0
M_NM_Male	0
M_NM_Male	0
M_NM_Male	0.0806902
IM_NM_undiluted	0.316157
IM_NM_undiluted	1.86237
IM_NM_undiluted	1.07769
IM_NM_undiluted	0.77703
IM_NM_undiluted	0.526978
IM_NM_undiluted	1.0488
IM_NM_undiluted	1.14709
IM_NM_undiluted	1.53338
IM_NM_undiluted	3.90111
IM_NM_undiluted	3.81406
IM_NM_undiluted	3.03443
IM_NM_undiluted	2.02213
IM_NM_undiluted	1.6496
IM_NM_undiluted	2.62489
IM_NM_undiluted	1.4995
IM_NM_undiluted	0.0588157
IM_NM_undiluted	0.0990455
IM_NM_undiluted	0.0541304
IM_NM_undiluted	0.289476
IM_NM_undiluted	1.38355
IM_NM_undiluted	0.97219
IM_NM_undiluted	2.01367
IM_FRFM_undiluted	0.306771
IM_FRFM_undiluted	0.270527
IM_FRFM_undiluted	0.161706
IM_FRFM_undiluted	0.260791
IM_FRFM_undiluted	3.24154
IM_FRFM_undiluted	5.4017
IM_FRFM_undiluted	4.31494
IM_FRFM_undiluted	2.7253
IM_FRFM_undiluted	3.24154
IM_FRFM_undiluted	5.4017
IM_FRFM_undiluted	4.31494
IM_FRFM_undiluted	2.7253
IM_FRFM_undiluted	1.21885
IM_FRFM_undiluted	1.51847
IM_FRFM_undiluted	0.720311
IM_FRFM_undiluted	3.98269
IM_FRFM_undiluted	0.375456
IM_FRFM_undiluted	0.0887739
IM_FRFM_undiluted	0.370857
IM_FRFM_undiluted	0.939061
IM_FRFM_undiluted	1.96681
IM_FRFM_undiluted	0.52557
IM_FRFM_undiluted	0.54485

## Sheet: erp4.10
sample	expression
IM_NM	4.92332
IM_NM	1.30227
IM_NM	2.06064
IM_NM	2.29715
IM_NM	2.71875
IM_NM	6.80115
IM_FRFM	5.24339
IM_FRFM	5.35782
IM_FRFM	4.52911
IM_FRFM	5.44117
IM_FRFM	1.52911
IM_FRFM	1.94145
PM_NM_Female	2.0933
PM_NM_Female	9.14282
PM_NM_Female	6.06452
PM_NM_Female	2.50731
PM_NM_Female	1.66154
PM_NM_Female	2.60779
PM_FRFM_Female	1.24048
PM_FRFM_Female	3.23252
PM_FRFM_Female	2.11789
PM_FRFM_Female	0.701731
PM_FRFM_Female	1.46378
PM_FRFM_Female	0.765634
PM_NM_Male	2.77836
PM_NM_Male	0.192598
PM_NM_Male	0.986297
PM_NM_Male	1.94538
PM_NM_Male	6.21824
PM_NM_Male	1.27872
PM_FRFM_Male	3.0227
PM_FRFM_Male	2.90622
PM_FRFM_Male	3.68145
PM_FRFM_Male	2.3641
PM_FRFM_Male	1.43708
PM_FRFM_Male	2.50215
M_NM_Female	0.000623757
M_NM_Female	0.00384244
M_NM_Female	0.0221943
M_NM_Female	0.01872
M_NM_Female	0.0166809
M_NM_Female	0.0554152
M_NM_Male	0.00967095
M_NM_Male	0.00505991
M_NM_Male	0.0497195
M_NM_Male	0.049806
M_NM_Male	0.350658
M_NM_Male	0.0935899
IM_NM_undiluted	7.39039
IM_NM_undiluted	4.3638
IM_NM_undiluted	10.804
IM_NM_undiluted	4.21879
IM_NM_undiluted	4.45092
IM_NM_undiluted	4.53628
IM_NM_undiluted	5.32784
IM_NM_undiluted	4.04518
IM_NM_undiluted	0.751975
IM_NM_undiluted	1.58365
IM_NM_undiluted	0.713865
IM_NM_undiluted	3.33224
IM_NM_undiluted	4.4662
IM_NM_undiluted	6.19303
IM_NM_undiluted	12.3169
IM_FRFM_undiluted	1.07954
IM_FRFM_undiluted	0.733606
IM_FRFM_undiluted	1.90186
IM_FRFM_undiluted	1.0489
IM_FRFM_undiluted	2.78069
IM_FRFM_undiluted	2.72497
IM_FRFM_undiluted	1.6394
IM_FRFM_undiluted	1.81037
IM_FRFM_undiluted	0.800104
IM_FRFM_undiluted	0.532661
IM_FRFM_undiluted	1.48539
IM_FRFM_undiluted	1.17666
IM_FRFM_undiluted	4.58249
IM_FRFM_undiluted	0.860167
IM_FRFM_undiluted	0.943967
