# Supplementary material for: Combined transcriptome and proteome profiling reveals specific molecular brain signatures for sex, maturation and circalunar clock phase
Source: eLife. 2019 Feb 15;8:e41556. doi: 10.7554/eLife.41556 (PMC6377233; doi:10.7554/eLife.41556)
Supplement: Figure 5—source data 3. — Table containing the over-and under-represented GO-terms using all 2,290 proteins deteced in the labelled proteome dataset. GO-terms are shown with their respective p-values, ontology (Molecular Function, Biological Process, Cellular Compartment), and test direction, i.e. over- or under-represented. [file elife-41556-fig5-data3.xlsx]

## Sheet: OVER
GOBPID	Pvalue	OddsRatio	ExpCount	Count	Size	Term	test	ontology	subset
GO:0006082	7.03e-15	3.01885	35.8331	85	326	organic acid metabolic process	over	BP	norm2290
GO:0065008	9.99e-15	3.883	20.9707	60	190	regulation of biological quality	over	BP	norm2290
GO:0006457	3.57e-11	3.92722	14.7899	43	134	protein folding	over	BP	norm2290
GO:0055114	3.93e-11	1.9508	90.655	151	823	oxidation-reduction process	over	BP	norm2290
GO:1901566	1.9e-10	1.94119	84.6248	141	772	organonitrogen compound biosynthetic process	over	BP	norm2290
GO:0034622	4.05e-09	4.12427	10.5957	32	96	cellular protein-containing complex assembly	over	BP	norm2290
GO:0007015	1.99e-08	7.36207	4.19414	18	38	actin filament organization	over	BP	norm2290
GO:0008064	2.93e-08	13.2479	2.31781	13	21	regulation of actin polymerization or depolymerization	over	BP	norm2290
GO:0032271	2.93e-08	13.2479	2.31781	13	21	regulation of protein polymerization	over	BP	norm2290
GO:0030163	3.84e-08	3.39796	13.2446	35	120	protein catabolic process	over	BP	norm2290
GO:0030029	9.51e-08	5.21256	5.96009	21	54	actin filament-based process	over	BP	norm2290
GO:0006518	9.67e-08	2.01202	49.1277	86	446	peptide metabolic process	over	BP	norm2290
GO:0032535	1.33e-07	10.5958	2.53856	13	23	regulation of cellular component size	over	BP	norm2290
GO:0043604	1.44e-07	1.98974	49.5571	86	449	amide biosynthetic process	over	BP	norm2290
GO:0044087	3.31e-07	8.15458	3.09042	14	28	regulation of cellular component biogenesis	over	BP	norm2290
GO:0045454	3.56e-07	3.81109	9.05051	26	82	cell redox homeostasis	over	BP	norm2290
GO:1902903	4.89e-07	8.82777	2.7593	13	25	regulation of supramolecular fiber organization	over	BP	norm2290
GO:0032956	4.89e-07	8.82777	2.7593	13	25	regulation of actin cytoskeleton organization	over	BP	norm2290
GO:0009126	6.28e-07	3.93526	8.16753	24	74	purine nucleoside monophosphate metabolic process	over	BP	norm2290
GO:0022607	6.89e-07	2.48779	21.964	46	199	cellular component assembly	over	BP	norm2290
GO:0006520	7.68e-07	2.37199	24.7921	50	225	cellular amino acid metabolic process	over	BP	norm2290
GO:0046034	8.06e-07	4.18994	7.17418	22	65	ATP metabolic process	over	BP	norm2290
GO:0009199	1.41e-06	3.7112	8.49865	24	77	ribonucleoside triphosphate metabolic process	over	BP	norm2290
GO:0009144	1.41e-06	3.7112	8.49865	24	77	purine nucleoside triphosphate metabolic process	over	BP	norm2290
GO:0051603	1.73e-06	3.23769	10.9268	28	99	proteolysis involved in cellular protein catabolic process	over	BP	norm2290
GO:0007010	1.93e-06	2.92918	13.4442	32	122	cytoskeleton organization	over	BP	norm2290
GO:0009168	2.33e-06	4.43706	5.96009	19	54	purine ribonucleoside monophosphate biosynthetic process	over	BP	norm2290
GO:1902600	2.56e-06	4.95707	4.96674	17	45	proton transmembrane transport	over	BP	norm2290
GO:0034314	2.61e-06	21.6496	1.21409	8	11	Arp2/3 complex-mediated actin nucleation	over	BP	norm2290
GO:0006334	3.48e-06	8.94862	2.31781	11	21	nucleosome assembly	over	BP	norm2290
GO:0019752	5.24e-06	4.88719	4.65994	16	44	carboxylic acid metabolic process	over	BP	norm2290
GO:0006333	1.08e-05	7.45544	2.53856	11	23	chromatin assembly or disassembly	over	BP	norm2290
GO:0009064	1.56e-05	5.57087	3.53191	13	32	glutamine family amino acid metabolic process	over	BP	norm2290
GO:0009206	1.81e-05	3.86661	6.18084	18	56	purine ribonucleoside triphosphate biosynthetic process	over	BP	norm2290
GO:0044283	1.84e-05	2.30961	19.6462	39	178	small molecule biosynthetic process	over	BP	norm2290
GO:0006091	1.99e-05	2.96668	10.375	25	94	generation of precursor metabolites and energy	over	BP	norm2290
GO:0044281	2.11e-05	4.47309	4.57721	15	45	small molecule metabolic process	over	BP	norm2290
GO:1901575	2.15e-05	1.96464	32.2059	56	293	organic substance catabolic process	over	BP	norm2290
GO:0046394	2.21e-05	2.80055	11.6994	27	106	carboxylic acid biosynthetic process	over	BP	norm2290
GO:0009142	3.1e-05	3.67241	6.40158	18	58	nucleoside triphosphate biosynthetic process	over	BP	norm2290
GO:0016999	3.99e-05	5.42349	3.31116	12	30	antibiotic metabolic process	over	BP	norm2290
GO:0006542	4.32e-05	14.1924	1.21409	7	11	glutamine biosynthetic process	over	BP	norm2290
GO:0016192	4.65e-05	2.50148	14.1543	30	129	vesicle-mediated transport	over	BP	norm2290
GO:0007160	4.78e-05	6.77123	2.42819	10	22	cell-matrix adhesion	over	BP	norm2290
GO:0070727	5.49e-05	2.25767	18.4321	36	167	cellular macromolecule localization	over	BP	norm2290
GO:0031334	6.77e-05	9.27406	1.65558	8	15	positive regulation of protein complex assembly	over	BP	norm2290
GO:0030838	6.77e-05	9.27406	1.65558	8	15	positive regulation of actin filament polymerization	over	BP	norm2290
GO:0009259	9.78e-05	2.42407	14.0173	29	127	ribonucleotide metabolic process	over	BP	norm2290
GO:0046496	9.83e-05	3.81805	5.18749	15	47	nicotinamide nucleotide metabolic process	over	BP	norm2290
GO:1901607	9.84e-05	4.07061	4.63563	14	42	alpha-amino acid biosynthetic process	over	BP	norm2290
GO:0051188	0.000117477	2.65821	10.7926	24	98	cofactor biosynthetic process	over	BP	norm2290
GO:0006090	0.000145757	4.97627	3.19543	11	29	pyruvate metabolic process	over	BP	norm2290
GO:0071824	0.000147989	4.9668	3.20079	11	29	protein-DNA complex subunit organization	over	BP	norm2290
GO:0006886	0.000150555	2.24194	16.4454	32	149	intracellular protein transport	over	BP	norm2290
GO:0072524	0.000198317	3.34206	6.07046	16	55	pyridine-containing compound metabolic process	over	BP	norm2290
GO:0010638	0.000208882	7.21147	1.87633	8	17	positive regulation of organelle organization	over	BP	norm2290
GO:0006511	0.000233331	2.72078	9.27125	21	84	ubiquitin-dependent protein catabolic process	over	BP	norm2290
GO:0043632	0.000233331	2.72078	9.27125	21	84	modification-dependent macromolecule catabolic process	over	BP	norm2290
GO:0098660	0.00023721	2.57362	10.5957	23	96	inorganic ion transmembrane transport	over	BP	norm2290
GO:0006733	0.000272979	3.39223	5.62898	15	51	oxidoreduction coenzyme metabolic process	over	BP	norm2290
GO:0031333	0.00028155	20.2412	0.772604	5	7	negative regulation of protein complex assembly	over	BP	norm2290
GO:0030837	0.00028155	20.2412	0.772604	5	7	negative regulation of actin filament polymerization	over	BP	norm2290
GO:0006108	0.00028155	20.2412	0.772604	5	7	malate metabolic process	over	BP	norm2290
GO:0015986	0.000339795	6.48956	1.9867	8	18	ATP synthesis coupled proton transport	over	BP	norm2290
GO:0090662	0.000404056	4.25577	3.53191	11	32	ATP hydrolysis coupled transmembrane transport	over	BP	norm2290
GO:0015991	0.000404056	4.25577	3.53191	11	32	ATP hydrolysis coupled proton transport	over	BP	norm2290
GO:0043933	0.000444054	2.24867	13.8044	27	126	protein-containing complex subunit organization	over	BP	norm2290
GO:0072350	0.000450222	5.22665	2.53457	9	23	tricarboxylic acid metabolic process	over	BP	norm2290
GO:0006099	0.00045558	5.21734	2.53856	9	23	tricarboxylic acid cycle	over	BP	norm2290
GO:0044248	0.000535132	1.78907	29.0183	47	264	cellular catabolic process	over	BP	norm2290
GO:0005975	0.000543292	1.69618	36.202	56	328	carbohydrate metabolic process	over	BP	norm2290
GO:0006412	0.000593072	1.75556	30.7213	49	283	translation	over	BP	norm2290
GO:0007155	0.000602405	2.23623	13.355	26	121	cell adhesion	over	BP	norm2290
GO:0006413	0.000658213	4.86895	2.64893	9	24	translational initiation	over	BP	norm2290
GO:0098655	0.000666555	2.30534	12.0306	24	109	cation transmembrane transport	over	BP	norm2290
GO:0006084	0.00067331	32.3592	0.55186	4	5	acetyl-CoA metabolic process	over	BP	norm2290
GO:0046835	0.000682423	13.4926	0.882977	5	8	carbohydrate phosphorylation	over	BP	norm2290
GO:0046390	0.000695724	2.34649	11.3683	23	103	ribose phosphate biosynthetic process	over	BP	norm2290
GO:0045184	0.000868086	1.90266	21.0811	36	191	establishment of protein localization	over	BP	norm2290
GO:0006081	0.000909977	6.30405	1.76595	7	16	cellular aldehyde metabolic process	over	BP	norm2290
GO:0015833	0.000958079	1.89024	21.1914	36	192	peptide transport	over	BP	norm2290
GO:0019363	0.0011534	3.36197	4.52525	12	41	pyridine nucleotide biosynthetic process	over	BP	norm2290
GO:0009152	0.00127614	2.27096	11.1476	22	101	purine ribonucleotide biosynthetic process	over	BP	norm2290
GO:0006793	0.00128468	10.3287	0.975755	5	9	phosphorus metabolic process	over	BP	norm2290
GO:0071616	0.00134117	Inf	0.331116	3	3	acyl-CoA biosynthetic process	over	BP	norm2290
GO:0006730	0.00154064	6.94237	1.43484	6	13	one-carbon metabolic process	over	BP	norm2290
GO:0006096	0.00173868	4.05603	2.98005	9	27	glycolytic process	over	BP	norm2290
GO:0009185	0.00173868	4.05603	2.98005	9	27	ribonucleoside diphosphate metabolic process	over	BP	norm2290
GO:0009135	0.00173868	4.05603	2.98005	9	27	purine nucleoside diphosphate metabolic process	over	BP	norm2290
GO:0046031	0.00173868	4.05603	2.98005	9	27	ADP metabolic process	over	BP	norm2290
GO:0030835	0.00184287	16.1777	0.662232	4	6	negative regulation of actin filament depolymerization	over	BP	norm2290
GO:0009116	0.00197179	2.93433	5.40823	13	49	nucleoside metabolic process	over	BP	norm2290
GO:0019725	0.00224813	6.18641	1.52034	6	14	cellular homeostasis	over	BP	norm2290
GO:0000413	0.00231504	3.84211	3.09042	9	28	protein peptidyl-prolyl isomerization	over	BP	norm2290
GO:0007034	0.00253926	8.09366	1.10372	5	10	vacuolar transport	over	BP	norm2290
GO:1901292	0.00277271	2.95307	4.96674	12	45	nucleoside phosphate catabolic process	over	BP	norm2290
GO:0019637	0.00306556	1.5374	40.6169	58	368	organophosphate metabolic process	over	BP	norm2290
GO:0043624	0.00312239	4.05313	2.64893	8	24	cellular protein complex disassembly	over	BP	norm2290
GO:0010639	0.00370017	5.39836	1.65558	6	15	negative regulation of organelle organization	over	BP	norm2290
GO:0006732	0.00380567	2.81209	5.14147	12	47	coenzyme metabolic process	over	BP	norm2290
GO:0006563	0.00390024	10.8043	0.77131	4	7	L-serine metabolic process	over	BP	norm2290
GO:0035383	0.00392464	10.7839	0.772604	4	7	thioester metabolic process	over	BP	norm2290
GO:0006012	0.00392464	10.7839	0.772604	4	7	galactose metabolic process	over	BP	norm2290
GO:0043242	0.00392464	10.7839	0.772604	4	7	negative regulation of protein complex disassembly	over	BP	norm2290
GO:1901879	0.00392464	10.7839	0.772604	4	7	regulation of protein depolymerization	over	BP	norm2290
GO:0007219	0.00415017	4.3623	2.20744	7	20	Notch signaling pathway	over	BP	norm2290
GO:0006897	0.00420583	6.75592	1.21218	5	11	endocytosis	over	BP	norm2290
GO:0007264	0.00487695	1.71454	21.6329	34	196	small GTPase mediated signal transduction	over	BP	norm2290
GO:0006072	0.00492173	24.2465	0.441488	3	4	glycerol-3-phosphate metabolic process	over	BP	norm2290
GO:0007268	0.00660698	5.77984	1.32446	5	12	chemical synaptic transmission	over	BP	norm2290
GO:0099537	0.00660698	5.77984	1.32446	5	12	trans-synaptic signaling	over	BP	norm2290
GO:0006165	0.006759	2.89652	4.19414	10	38	nucleoside diphosphate phosphorylation	over	BP	norm2290
GO:0022411	0.00698553	3.41196	2.98005	8	27	cellular component disassembly	over	BP	norm2290
GO:0044282	0.00706039	8.12476	0.879341	4	8	small molecule catabolic process	over	BP	norm2290
GO:0006206	0.00716685	8.08696	0.882977	4	8	pyrimidine nucleobase metabolic process	over	BP	norm2290
GO:1901564	0.00787346	1.24573	157.109	184	1563	organonitrogen compound metabolic process	over	BP	norm2290
GO:0009225	0.00977345	5.05676	1.43484	5	13	nucleotide-sugar metabolic process	over	BP	norm2290
GO:0042558	0.00977345	5.05676	1.43484	5	13	pteridine-containing compound metabolic process	over	BP	norm2290
GO:0006417	0.00977345	5.05676	1.43484	5	13	regulation of translation	over	BP	norm2290
GO:0046907	0.0106301	2.85365	3.80555	9	35	intracellular transport	over	BP	norm2290
GO:0045333	0.011271	2.37463	5.84972	12	53	cellular respiration	over	BP	norm2290
GO:0007269	0.0112944	12.1218	0.55186	3	5	neurotransmitter secretion	over	BP	norm2290
GO:0009303	0.0112944	12.1218	0.55186	3	5	rRNA transcription	over	BP	norm2290
GO:0033500	0.0112944	12.1218	0.55186	3	5	carbohydrate homeostasis	over	BP	norm2290
GO:0001678	0.0112944	12.1218	0.55186	3	5	cellular glucose homeostasis	over	BP	norm2290
GO:0072329	0.0117835	6.46881	0.993349	4	9	monocarboxylic acid catabolic process	over	BP	norm2290
GO:0006564	0.0121718	Inf	0.220744	2	2	L-serine biosynthetic process	over	BP	norm2290
GO:0006537	0.0121718	Inf	0.220744	2	2	glutamate biosynthetic process	over	BP	norm2290
GO:0009448	0.0121718	Inf	0.220744	2	2	gamma-aminobutyric acid metabolic process	over	BP	norm2290
GO:0006086	0.0121718	Inf	0.220744	2	2	acetyl-CoA biosynthetic process from pyruvate	over	BP	norm2290
GO:0090382	0.0121718	Inf	0.220744	2	2	phagosome maturation	over	BP	norm2290
GO:0051694	0.0121718	Inf	0.220744	2	2	pointed-end actin filament capping	over	BP	norm2290
GO:0006892	0.0121718	Inf	0.220744	2	2	post-Golgi vesicle-mediated transport	over	BP	norm2290
GO:0006414	0.0125136	3.33432	2.64893	7	24	translational elongation	over	BP	norm2290
GO:0042133	0.0137487	4.5029	1.54262	5	14	neurotransmitter metabolic process	over	BP	norm2290
GO:0006163	0.0147644	3.19417	2.72465	7	25	purine nucleotide metabolic process	over	BP	norm2290
GO:0048522	0.0150718	2.10426	7.5053	14	68	positive regulation of cellular process	over	BP	norm2290
GO:0055086	0.0151064	1.49009	30.0314	42	275	nucleobase-containing small molecule metabolic process	over	BP	norm2290
GO:0071840	0.0172083	1.30867	69.0929	86	626	cellular component organization or biogenesis	over	BP	norm2290
GO:0006164	0.0201643	8.17551	0.655393	3	6	purine nucleotide biosynthetic process	over	BP	norm2290
GO:0006098	0.0207458	8.08026	0.662232	3	6	pentose-phosphate shunt	over	BP	norm2290
GO:0006013	0.0207458	8.08026	0.662232	3	6	mannose metabolic process	over	BP	norm2290
GO:0061025	0.0207458	8.08026	0.662232	3	6	membrane fusion	over	BP	norm2290
GO:0006471	0.0207458	8.08026	0.662232	3	6	protein ADP-ribosylation	over	BP	norm2290
GO:0006207	0.0207458	8.08026	0.662232	3	6	'de novo' pyrimidine nucleobase biosynthetic process	over	BP	norm2290
GO:0006779	0.0207458	8.08026	0.662232	3	6	porphyrin-containing compound biosynthetic process	over	BP	norm2290
GO:0016054	0.0241226	2.59127	3.64228	8	33	organic acid catabolic process	over	BP	norm2290
GO:0051641	0.0297322	3.45479	1.83535	5	17	cellular localization	over	BP	norm2290
GO:0006796	0.0323719	1.22709	96.9067	114	878	phosphate-containing compound metabolic process	over	BP	norm2290
GO:0044267	0.0328955	1.22569	97.9339	115	921	cellular protein metabolic process	over	BP	norm2290
GO:0009156	0.0330345	16.3766	0.327028	2	3	ribonucleoside monophosphate biosynthetic process	over	BP	norm2290
GO:0033014	0.0331674	6.07457	0.770903	3	7	tetrapyrrole biosynthetic process	over	BP	norm2290
GO:0019318	0.033308	16.2977	0.328433	2	3	hexose metabolic process	over	BP	norm2290
GO:0006662	0.0333617	6.05949	0.772604	3	7	glycerol ether metabolic process	over	BP	norm2290
GO:0048284	0.0333617	6.05949	0.772604	3	7	organelle fusion	over	BP	norm2290
GO:0006873	0.0333617	6.05949	0.772604	3	7	cellular ion homeostasis	over	BP	norm2290
GO:0006875	0.0333617	6.05949	0.772604	3	7	cellular metal ion homeostasis	over	BP	norm2290
GO:0007188	0.033833	16.1491	0.331116	2	3	adenylate cyclase-modulating G-protein coupled receptor signaling pathway	over	BP	norm2290
GO:0006546	0.033833	16.1491	0.331116	2	3	glycine catabolic process	over	BP	norm2290
GO:0034311	0.033833	16.1491	0.331116	2	3	diol metabolic process	over	BP	norm2290
GO:0006089	0.033833	16.1491	0.331116	2	3	lactate metabolic process	over	BP	norm2290
GO:0006906	0.033833	16.1491	0.331116	2	3	vesicle fusion	over	BP	norm2290
GO:0009298	0.033833	16.1491	0.331116	2	3	GDP-mannose biosynthetic process	over	BP	norm2290
GO:0030198	0.033833	16.1491	0.331116	2	3	extracellular matrix organization	over	BP	norm2290
GO:0043173	0.033833	16.1491	0.331116	2	3	nucleotide salvage	over	BP	norm2290
GO:0070831	0.033833	16.1491	0.331116	2	3	basement membrane assembly	over	BP	norm2290
GO:0019243	0.033833	16.1491	0.331116	2	3	methylglyoxal catabolic process to D-lactate via S-lactoyl-glutathione	over	BP	norm2290
GO:0006102	0.033833	16.1491	0.331116	2	3	isocitrate metabolic process	over	BP	norm2290
GO:0051596	0.033833	16.1491	0.331116	2	3	methylglyoxal catabolic process	over	BP	norm2290
GO:0006729	0.033833	16.1491	0.331116	2	3	tetrahydrobiopterin biosynthetic process	over	BP	norm2290
GO:0006898	0.033833	16.1491	0.331116	2	3	receptor-mediated endocytosis	over	BP	norm2290
GO:0090286	0.033833	16.1491	0.331116	2	3	cytoskeletal anchoring at nuclear membrane	over	BP	norm2290
GO:0044272	0.0346728	2.85528	2.53856	6	23	sulfur compound biosynthetic process	over	BP	norm2290
GO:0046112	0.0353685	4.04159	1.32446	4	12	nucleobase biosynthetic process	over	BP	norm2290
GO:0008299	0.0353685	4.04159	1.32446	4	12	isoprenoid biosynthetic process	over	BP	norm2290
GO:0006006	0.0408759	3.11004	1.9867	5	18	glucose metabolic process	over	BP	norm2290
GO:0006418	0.0432323	1.70756	10.1542	16	92	tRNA aminoacylation for protein translation	over	BP	norm2290
GO:0046903	0.0453351	2.23281	4.08377	8	37	secretion	over	BP	norm2290
GO:0071705	0.0468514	1.38784	28.0345	37	254	nitrogen compound transport	over	BP	norm2290
GO:0006635	0.0490787	4.84703	0.882977	3	8	fatty acid beta-oxidation	over	BP	norm2290
GO:0023061	0.0490787	4.84703	0.882977	3	8	signal release	over	BP	norm2290
GO:0034440	0.0490787	4.84703	0.882977	3	8	lipid oxidation	over	BP	norm2290
GO:0043101	0.0490787	4.84703	0.882977	3	8	purine-containing compound salvage	over	BP	norm2290
GO:0006465	0.0490787	4.84703	0.882977	3	8	signal peptide processing	over	BP	norm2290
GO:0005622	2.47e-46	3.77568	227.2	384	2060	intracellular	over	CC	norm2290
GO:0005623	1.8e-41	3.5662	252.236	400	2287	cell	over	CC	norm2290
GO:0005737	4.38e-14	3.54287	24.8455	65	270	cytoplasm	over	CC	norm2290
GO:0032991	3.67e-12	2.10925	96.0947	157	944	protein-containing complex	over	CC	norm2290
GO:0043228	2.52e-10	2.10444	71.1378	121	645	non-membrane-bounded organelle	over	CC	norm2290
GO:1905369	1.3e-07	6.70576	4.19107	17	38	endopeptidase complex	over	CC	norm2290
GO:0005885	1.92e-07	Inf	0.772038	7	7	Arp2/3 protein complex	over	CC	norm2290
GO:0044446	6.49e-07	1.94089	52.8932	87	498	intracellular organelle part	over	CC	norm2290
GO:0030117	1.92e-06	4.80796	5.40427	18	49	membrane coat	over	CC	norm2290
GO:0005852	2.33e-06	11.718	1.87495	10	17	eukaryotic translation initiation factor 3 complex	over	CC	norm2290
GO:0099512	4.76e-06	4.68451	5.18369	17	47	supramolecular fiber	over	CC	norm2290
GO:0099080	4.76e-06	4.68451	5.18369	17	47	supramolecular complex	over	CC	norm2290
GO:0005874	8.58e-06	5.49165	3.86019	14	35	microtubule	over	CC	norm2290
GO:0000786	1.26e-05	5.24085	3.97048	14	36	nucleosome	over	CC	norm2290
GO:0005739	2.03e-05	3.06831	9.81592	24	89	mitochondrion	over	CC	norm2290
GO:0043229	4.08e-05	1.63443	76.7036	108	780	intracellular organelle	over	CC	norm2290
GO:0030662	7.39e-05	6.30118	2.5367	10	23	coated vesicle membrane	over	CC	norm2290
GO:0016272	0.000109952	16.2998	0.992621	6	9	prefoldin complex	over	CC	norm2290
GO:0016469	0.000110906	8.27052	1.74604	8	16	proton-transporting two-sector ATPase complex	over	CC	norm2290
GO:0012506	0.000114352	5.84978	2.64699	10	24	vesicle membrane	over	CC	norm2290
GO:0005783	0.000180192	2.80072	9.15417	21	83	endoplasmic reticulum	over	CC	norm2290
GO:0031410	0.00018942	7.35113	1.85485	8	17	cytoplasmic vesicle	over	CC	norm2290
GO:0005740	0.00025988	3.42704	5.62485	15	51	mitochondrial envelope	over	CC	norm2290
GO:0030660	0.000299718	5.66063	2.42641	9	22	Golgi-associated vesicle membrane	over	CC	norm2290
GO:0005839	0.000528181	7.20417	1.64067	7	15	proteasome core complex	over	CC	norm2290
GO:0033180	0.000675597	13.5584	0.882329	5	8	proton-transporting V-type ATPase, V1 domain	over	CC	norm2290
GO:0005840	0.000793525	1.75655	30.5507	48	277	ribosome	over	CC	norm2290
GO:0031982	0.000839393	8.27002	1.30581	6	12	vesicle	over	CC	norm2290
GO:0031975	0.000998729	2.5245	8.93359	19	81	envelope	over	CC	norm2290
GO:0000159	0.00133513	Inf	0.330874	3	3	protein phosphatase type 2A complex	over	CC	norm2290
GO:0099503	0.00133513	Inf	0.330874	3	3	secretory vesicle	over	CC	norm2290
GO:0008021	0.00133513	Inf	0.330874	3	3	synaptic vesicle	over	CC	norm2290
GO:0019773	0.00152174	6.97937	1.43379	6	13	proteasome core complex, alpha-subunit complex	over	CC	norm2290
GO:0005856	0.00199846	2.92774	5.41677	13	51	cytoskeleton	over	CC	norm2290
GO:0031090	0.00407908	2.17259	10.0112	19	92	organelle membrane	over	CC	norm2290
GO:0005853	0.00490088	24.3273	0.441165	3	4	eukaryotic translation elongation factor 1 complex	over	CC	norm2290
GO:0005743	0.00521417	3.64002	2.856	8	26	mitochondrial inner membrane	over	CC	norm2290
GO:0030126	0.00712283	8.1184	0.882329	4	8	COPI vesicle coat	over	CC	norm2290
GO:0030137	0.00712283	8.1184	0.882329	4	8	COPI-coated vesicle	over	CC	norm2290
GO:0030133	0.0110512	12.2477	0.548	3	5	transport vesicle	over	CC	norm2290
GO:1903293	0.0112495	12.1609	0.551456	3	5	phosphatase complex	over	CC	norm2290
GO:0030125	0.0112495	12.1609	0.551456	3	5	clathrin vesicle coat	over	CC	norm2290
GO:0030131	0.011715	6.49326	0.992621	4	9	clathrin adaptor complex	over	CC	norm2290
GO:0043564	0.0121446	Inf	0.220582	2	2	Ku70:Ku80 complex	over	CC	norm2290
GO:0045335	0.0121446	Inf	0.220582	2	2	phagocytic vesicle	over	CC	norm2290
GO:0030658	0.013739	4.51338	1.54408	5	14	transport vesicle membrane	over	CC	norm2290
GO:0005794	0.0180702	2.30116	5.51456	11	50	Golgi apparatus	over	CC	norm2290
GO:0022624	0.0206687	8.10545	0.661747	3	6	proteasome accessory complex	over	CC	norm2290
GO:0030136	0.0206687	8.10545	0.661747	3	6	clathrin-coated vesicle	over	CC	norm2290
GO:0000276	0.0206687	8.10545	0.661747	3	6	mitochondrial proton-transporting ATP synthase complex, coupling factor F(o)	over	CC	norm2290
GO:0044444	0.0213098	1.81234	10.8652	18	116	cytoplasmic part	over	CC	norm2290
GO:0044430	0.0215775	1.68304	14.8889	23	138	cytoskeletal part	over	CC	norm2290
GO:0033177	0.0279422	3.0473	2.42641	6	22	proton-transporting two-sector ATPase complex, proton-transporting domain	over	CC	norm2290
GO:0012505	0.0286972	3.00589	2.43374	6	23	endomembrane system	over	CC	norm2290
GO:1990204	0.0329801	6.09854	0.769707	3	7	oxidoreductase complex	over	CC	norm2290
GO:0045261	0.0332458	6.07773	0.772038	3	7	proton-transporting ATP synthase complex, catalytic core F(1)	over	CC	norm2290
GO:0005746	0.0332458	6.07773	0.772038	3	7	mitochondrial respiratory chain	over	CC	norm2290
GO:0005869	0.0332458	6.07773	0.772038	3	7	dynactin complex	over	CC	norm2290
GO:0016471	0.0337635	16.1887	0.330874	2	3	vacuolar proton-transporting V-type ATPase complex	over	CC	norm2290
GO:0009331	0.0337635	16.1887	0.330874	2	3	glycerol-3-phosphate dehydrogenase complex	over	CC	norm2290
GO:0008290	0.0337635	16.1887	0.330874	2	3	F-actin capping protein complex	over	CC	norm2290
GO:0106083	0.0337635	16.1887	0.330874	2	3	nuclear membrane protein complex	over	CC	norm2290
GO:0034993	0.0337635	16.1887	0.330874	2	3	meiotic nuclear membrane microtubule tethering complex	over	CC	norm2290
GO:0016459	0.0387556	2.32398	3.97048	8	36	myosin complex	over	CC	norm2290
GO:0005694	0.0455222	1.6178	12.6835	19	115	chromosome	over	CC	norm2290
GO:0045259	0.0484143	4.88336	0.87877	3	8	proton-transporting ATP synthase complex	over	CC	norm2290
GO:0005509	6.32e-15	2.45992	57.8412	119	548	calcium ion binding	over	MF	norm2290
GO:0016491	5.13e-11	1.95824	82.1803	141	790	oxidoreductase activity	over	MF	norm2290
GO:0003924	7.98e-11	5.01118	9.18282	32	87	GTPase activity	over	MF	norm2290
GO:0001883	8.25e-11	2.83906	27.0207	63	256	purine nucleoside binding	over	MF	norm2290
GO:0005525	8.25e-11	2.83906	27.0207	63	256	GTP binding	over	MF	norm2290
GO:0019001	1.65e-10	2.78058	27.4429	63	260	guanyl nucleotide binding	over	MF	norm2290
GO:0032549	4.5e-10	2.69717	28.0762	63	266	ribonucleoside binding	over	MF	norm2290
GO:0000166	7.05e-09	1.53003	196.324	270	1884	nucleotide binding	over	MF	norm2290
GO:0051287	1.71e-07	5.18857	5.59413	20	53	NAD binding	over	MF	norm2290
GO:0005200	4.32e-07	10.2388	2.32209	12	22	structural constituent of cytoskeleton	over	MF	norm2290
GO:0003723	4.72e-07	1.92195	48.975	84	464	RNA binding	over	MF	norm2290
GO:0016616	7.4e-07	5.15601	5.04491	18	48	oxidoreductase activity, acting on the CH-OH group of donors, NAD or NADP as acceptor	over	MF	norm2290
GO:0003743	8.8e-07	6.40667	3.69424	15	35	translation initiation factor activity	over	MF	norm2290
GO:0022853	1.47e-06	8.53105	2.53319	12	24	active ion transmembrane transporter activity	over	MF	norm2290
GO:0004298	1.57e-06	7.39662	2.95539	13	28	threonine-type endopeptidase activity	over	MF	norm2290
GO:0019825	1.62e-06	12.1763	1.79434	10	17	oxygen binding	over	MF	norm2290
GO:0051082	2.77e-06	3.76694	7.59958	22	72	unfolded protein binding	over	MF	norm2290
GO:0016874	5.3e-06	2.32767	21.321	43	202	ligase activity	over	MF	norm2290
GO:0043168	5.63e-06	1.42484	170.532	224	1652	anion binding	over	MF	norm2290
GO:0051015	6.29e-06	9.46906	2.00544	10	19	actin filament binding	over	MF	norm2290
GO:0003779	1.7e-05	4.05724	5.56597	17	53	actin binding	over	MF	norm2290
GO:0032555	1.78e-05	1.39877	168.879	219	1600	purine ribonucleotide binding	over	MF	norm2290
GO:0019842	3.03e-05	2.78328	11.1883	26	106	vitamin binding	over	MF	norm2290
GO:0005515	3.94e-05	1.26663	401.092	467	3841	protein binding	over	MF	norm2290
GO:0005544	8.68e-05	17.0088	0.949947	6	9	calcium-dependent phospholipid binding	over	MF	norm2290
GO:0008483	8.94e-05	8.51201	1.68879	8	16	transaminase activity	over	MF	norm2290
GO:0003995	8.94e-05	8.51201	1.68879	8	16	acyl-CoA dehydrogenase activity	over	MF	norm2290
GO:0097367	9.05e-05	1.34937	177.746	224	1684	carbohydrate derivative binding	over	MF	norm2290
GO:0016853	0.000135051	2.31514	14.8825	30	141	isomerase activity	over	MF	norm2290
GO:0030170	0.000175397	3.0742	7.17738	18	68	pyridoxal phosphate binding	over	MF	norm2290
GO:0008289	0.000183617	3.99256	4.29495	13	41	lipid binding	over	MF	norm2290
GO:0004364	0.000227738	21.2492	0.738848	5	7	glutathione transferase activity	over	MF	norm2290
GO:0003735	0.000347161	1.80845	29.1317	48	276	structural constituent of ribosome	over	MF	norm2290
GO:0016880	0.000696389	6.61578	1.68879	7	16	acid-ammonia (or amide) ligase activity	over	MF	norm2290
GO:0004356	0.000696389	6.61578	1.68879	7	16	glutamate-ammonia ligase activity	over	MF	norm2290
GO:0046961	0.000696389	6.61578	1.68879	7	16	proton-transporting ATPase activity, rotational mechanism	over	MF	norm2290
GO:0008137	0.00107659	5.95376	1.79434	7	17	NADH dehydrogenase (ubiquinone) activity	over	MF	norm2290
GO:0016655	0.00107659	5.95376	1.79434	7	17	oxidoreductase activity, acting on NAD(P)H, quinone or similar compound as acceptor	over	MF	norm2290
GO:0030791	0.00117392	Inf	0.316649	3	3	arsenite methyltransferase activity	over	MF	norm2290
GO:0031543	0.00117392	Inf	0.316649	3	3	peptidyl-proline dioxygenase activity	over	MF	norm2290
GO:0004656	0.00117392	Inf	0.316649	3	3	procollagen-proline 4-dioxygenase activity	over	MF	norm2290
GO:0004449	0.00117392	Inf	0.316649	3	3	isocitrate dehydrogenase (NAD+) activity	over	MF	norm2290
GO:0003954	0.00160235	5.41211	1.89989	7	18	NADH dehydrogenase activity	over	MF	norm2290
GO:0005543	0.00174554	3.35739	4.10335	11	39	phospholipid binding	over	MF	norm2290
GO:0046933	0.00207992	8.49779	1.0555	5	10	proton-transporting ATP synthase activity, rotational mechanism	over	MF	norm2290
GO:0003755	0.00223906	3.82941	3.06094	9	29	peptidyl-prolyl cis-trans isomerase activity	over	MF	norm2290
GO:0009055	0.00238687	2.41617	8.12732	17	77	electron transfer activity	over	MF	norm2290
GO:0004674	0.0025377	2.48012	7.49403	16	71	protein serine/threonine kinase activity	over	MF	norm2290
GO:0003746	0.00323088	4.57879	2.11099	7	20	translation elongation factor activity	over	MF	norm2290
GO:0043022	0.00332825	11.3249	0.738848	4	7	ribosome binding	over	MF	norm2290
GO:0019829	0.00342897	7.10921	1.15693	5	11	cation-transporting ATPase activity	over	MF	norm2290
GO:0004471	0.00432457	25.4688	0.422199	3	4	malate dehydrogenase (decarboxylating) (NAD+) activity	over	MF	norm2290
GO:0004075	0.00432457	25.4688	0.422199	3	4	biotin carboxylase activity	over	MF	norm2290
GO:0051536	0.00518852	2.2726	8.02177	16	76	iron-sulfur cluster binding	over	MF	norm2290
GO:0016861	0.00545667	6.06895	1.2666	5	12	intramolecular oxidoreductase activity, interconverting aldoses and ketoses	over	MF	norm2290
GO:0051920	0.00610217	8.49306	0.844397	4	8	peroxiredoxin activity	over	MF	norm2290
GO:0044877	0.00653332	3.42832	2.93502	8	28	protein-containing complex binding	over	MF	norm2290
GO:0004198	0.00770623	3.71944	2.42764	7	23	calcium-dependent cysteine-type endopeptidase activity	over	MF	norm2290
GO:0004197	0.00818994	4.26316	1.89442	6	18	cysteine-type endopeptidase activity	over	MF	norm2290
GO:0016615	0.00993016	12.7495	0.527154	3	5	malate dehydrogenase activity	over	MF	norm2290
GO:0016805	0.00996186	12.7335	0.527748	3	5	dipeptidase activity	over	MF	norm2290
GO:0004396	0.00996186	12.7335	0.527748	3	5	hexokinase activity	over	MF	norm2290
GO:0046527	0.00996186	12.7335	0.527748	3	5	glucosyltransferase activity	over	MF	norm2290
GO:0004372	0.00996186	12.7335	0.527748	3	5	glycine hydroxymethyltransferase activity	over	MF	norm2290
GO:0031369	0.00996186	12.7335	0.527748	3	5	translation initiation factor binding	over	MF	norm2290
GO:0004017	0.00996186	12.7335	0.527748	3	5	adenylate kinase activity	over	MF	norm2290
GO:0005536	0.00996186	12.7335	0.527748	3	5	glucose binding	over	MF	norm2290
GO:0030145	0.0100729	6.79395	0.949947	4	9	manganese ion binding	over	MF	norm2290
GO:0016763	0.0107909	2.37829	5.7987	12	55	transferase activity, transferring pentosyl groups	over	MF	norm2290
GO:0030060	0.0111345	Inf	0.211099	2	2	L-malate dehydrogenase activity	over	MF	norm2290
GO:0005344	0.0111345	Inf	0.211099	2	2	oxygen carrier activity	over	MF	norm2290
GO:0004655	0.0111345	Inf	0.211099	2	2	porphobilinogen synthase activity	over	MF	norm2290
GO:0004375	0.0111345	Inf	0.211099	2	2	glycine dehydrogenase (decarboxylating) activity	over	MF	norm2290
GO:0003980	0.0111345	Inf	0.211099	2	2	UDP-glucose:glycoprotein glucosyltransferase activity	over	MF	norm2290
GO:0004731	0.0111345	Inf	0.211099	2	2	purine-nucleoside phosphorylase activity	over	MF	norm2290
GO:0004739	0.0111345	Inf	0.211099	2	2	pyruvate dehydrogenase (acetyl-transferring) activity	over	MF	norm2290
GO:0005523	0.0111345	Inf	0.211099	2	2	tropomyosin binding	over	MF	norm2290
GO:0016748	0.0111345	Inf	0.211099	2	2	succinyltransferase activity	over	MF	norm2290
GO:0008641	0.0115272	4.71959	1.4777	5	14	ubiquitin-like modifier activating enzyme activity	over	MF	norm2290
GO:0016836	0.0127941	2.96689	3.26272	8	31	hydro-lyase activity	over	MF	norm2290
GO:0070011	0.0130256	1.33063	64.4908	82	611	peptidase activity, acting on L-amino acid peptides	over	MF	norm2290
GO:0031683	0.0154016	5.6612	1.0555	4	10	G-protein beta/gamma-subunit complex binding	over	MF	norm2290
GO:0016651	0.0155174	4.26952	1.5759	5	15	oxidoreductase activity, acting on NAD(P)H	over	MF	norm2290
GO:0016814	0.0158139	4.24732	1.58324	5	15	hydrolase activity, acting on carbon-nitrogen (but not peptide) bonds, in cyclic amidines	over	MF	norm2290
GO:0004616	0.0183672	8.48834	0.633298	3	6	phosphogluconate dehydrogenase (decarboxylating) activity	over	MF	norm2290
GO:0046912	0.0183672	8.48834	0.633298	3	6	transferase activity, transferring acyl groups, acyl groups converted into alkyl on transfer	over	MF	norm2290
GO:0008484	0.018444	3.39874	2.21654	6	21	sulfuric ester hydrolase activity	over	MF	norm2290
GO:0005044	0.0214779	1.986	7.81067	14	74	scavenger receptor activity	over	MF	norm2290
GO:0016597	0.022212	4.8521	1.16105	4	11	amino acid binding	over	MF	norm2290
GO:0002161	0.022212	4.8521	1.16105	4	11	aminoacyl-tRNA editing activity	over	MF	norm2290
GO:0050662	0.0227183	1.82762	10.1402	17	98	coenzyme binding	over	MF	norm2290
GO:0008144	0.0256996	1.18737	153.516	176	1462	drug binding	over	MF	norm2290
GO:0020037	0.0262869	1.5661	18.3656	27	174	heme binding	over	MF	norm2290
GO:0004177	0.0272824	3.53891	1.79434	5	17	aminopeptidase activity	over	MF	norm2290
GO:0048037	0.0273059	4.41198	1.2238	4	12	cofactor binding	over	MF	norm2290
GO:0016668	0.0296464	6.36578	0.738848	3	7	oxidoreductase activity, acting on a sulfur group of donors, NAD(P) as acceptor	over	MF	norm2290
GO:0016783	0.0296464	6.36578	0.738848	3	7	sulfurtransferase activity	over	MF	norm2290
GO:0016903	0.0304168	4.25348	1.26442	4	12	oxidoreductase activity, acting on the aldehyde or oxo group of donors	over	MF	norm2290
GO:0016620	0.0305896	4.24527	1.2666	4	12	oxidoreductase activity, acting on the aldehyde or oxo group of donors, NAD or NADP as acceptor	over	MF	norm2290
GO:0033218	0.0305896	4.24527	1.2666	4	12	amide binding	over	MF	norm2290
GO:0004089	0.0305896	4.24527	1.2666	4	12	carbonate dehydratase activity	over	MF	norm2290
GO:0005388	0.0310556	16.9685	0.316649	2	3	calcium-transporting ATPase activity	over	MF	norm2290
GO:0004576	0.0310556	16.9685	0.316649	2	3	oligosaccharyl transferase activity	over	MF	norm2290
GO:0043141	0.0310556	16.9685	0.316649	2	3	ATP-dependent 5'-3' DNA helicase activity	over	MF	norm2290
GO:0019905	0.0310556	16.9685	0.316649	2	3	syntaxin binding	over	MF	norm2290
GO:0004335	0.0310556	16.9685	0.316649	2	3	galactokinase activity	over	MF	norm2290
GO:0004450	0.0310556	16.9685	0.316649	2	3	isocitrate dehydrogenase (NADP+) activity	over	MF	norm2290
GO:0004416	0.0310556	16.9685	0.316649	2	3	hydroxyacylglutathione hydrolase activity	over	MF	norm2290
GO:0016417	0.0310556	16.9685	0.316649	2	3	S-acyltransferase activity	over	MF	norm2290
GO:0004749	0.0310556	16.9685	0.316649	2	3	ribose phosphate diphosphokinase activity	over	MF	norm2290
GO:0016774	0.0310556	16.9685	0.316649	2	3	phosphotransferase activity, carboxyl group as acceptor	over	MF	norm2290
GO:0016743	0.0310556	16.9685	0.316649	2	3	carboxyl- or carbamoyltransferase activity	over	MF	norm2290
GO:0031406	0.0343468	3.273	1.8965	5	18	carboxylic acid binding	over	MF	norm2290
GO:0050660	0.0358369	1.83255	8.33842	14	79	flavin adenine dinucleotide binding	over	MF	norm2290
GO:0004866	0.0376853	2.1858	4.64418	9	44	endopeptidase inhibitor activity	over	MF	norm2290
GO:0015035	0.0393198	2.47815	3.27204	7	31	protein disulfide oxidoreductase activity	over	MF	norm2290
GO:0015078	0.0405856	1.89944	6.93513	12	66	proton transmembrane transporter activity	over	MF	norm2290
GO:0004812	0.0432217	1.70191	10.1328	16	96	aminoacyl-tRNA ligase activity	over	MF	norm2290
GO:0016868	0.043773	5.09225	0.844397	3	8	intramolecular transferase activity, phosphotransferases	over	MF	norm2290
GO:0004185	0.043773	5.09225	0.844397	3	8	serine-type carboxypeptidase activity	over	MF	norm2290
GO:0016829	0.0458205	1.47475	19.3156	27	183	lyase activity	over	MF	norm2290
GO:0060589	0.0484957	2.06734	4.85528	9	46	nucleoside-triphosphatase regulator activity	over	MF	norm2290

## Sheet: UNDER
GOBPID	Pvalue	OddsRatio	ExpCount	Count	Size	Term	test	ontology	subset
GO:0090304	9.64e-47	0.236918	245.467	78	2224	nucleic acid metabolic process	under	BP	norm2290
GO:0006259	2.87e-35	0.127381	120.306	19	1090	DNA metabolic process	under	BP	norm2290
GO:0006139	9.2e-31	0.373743	284.981	138	2582	nucleobase-containing compound metabolic process	under	BP	norm2290
GO:0046483	3.98e-27	0.408461	292.596	153	2651	heterocycle metabolic process	under	BP	norm2290
GO:0006725	2.77e-26	0.415652	292.376	155	2649	cellular aromatic compound metabolic process	under	BP	norm2290
GO:1901360	9.95e-26	0.422507	295.466	159	2677	organic cyclic compound metabolic process	under	BP	norm2290
GO:0032774	2.05e-17	0.249267	89.291	26	809	RNA biosynthetic process	under	BP	norm2290
GO:0006351	3.58e-17	0.251385	88.6288	26	803	transcription, DNA-templated	under	BP	norm2290
GO:0097659	3.58e-17	0.251385	88.6288	26	803	nucleic acid-templated transcription	under	BP	norm2290
GO:1903506	5.6e-17	0.213829	76.2671	19	691	regulation of nucleic acid-templated transcription	under	BP	norm2290
GO:0006355	5.6e-17	0.213829	76.2671	19	691	regulation of transcription, DNA-templated	under	BP	norm2290
GO:2001141	5.6e-17	0.213829	76.2671	19	691	regulation of RNA biosynthetic process	under	BP	norm2290
GO:0019219	1.02e-16	0.228288	79.0264	21	716	regulation of nucleobase-containing compound metabolic process	under	BP	norm2290
GO:0044260	1.2e-16	0.545434	357.164	241	3236	cellular macromolecule metabolic process	under	BP	norm2290
GO:0043170	2e-16	0.573064	452.415	330	4099	macromolecule metabolic process	under	BP	norm2290
GO:0051252	2.09e-16	0.224936	76.4878	20	693	regulation of RNA metabolic process	under	BP	norm2290
GO:0006260	2.49e-16	0.0432276	39.7339	2	360	DNA replication	under	BP	norm2290
GO:0034641	1.59e-15	0.549779	331.227	222	3001	cellular nitrogen compound metabolic process	under	BP	norm2290
GO:0009889	2.75e-15	0.258815	80.1301	24	726	regulation of biosynthetic process	under	BP	norm2290
GO:0031326	3.01e-15	0.259217	80.0197	24	725	regulation of cellular biosynthetic process	under	BP	norm2290
GO:0010556	3.3e-15	0.25962	79.9094	24	724	regulation of macromolecule biosynthetic process	under	BP	norm2290
GO:2000112	3.3e-15	0.25962	79.9094	24	724	regulation of cellular macromolecule biosynthetic process	under	BP	norm2290
GO:0080090	2.54e-14	0.290019	83.7724	28	759	regulation of primary metabolic process	under	BP	norm2290
GO:0031323	3.3e-14	0.291326	83.4413	28	756	regulation of cellular metabolic process	under	BP	norm2290
GO:0060255	3.33e-14	0.296231	84.9865	29	770	regulation of macromolecule metabolic process	under	BP	norm2290
GO:0010468	3.42e-14	0.28136	80.2405	26	727	regulation of gene expression	under	BP	norm2290
GO:0019222	3.64e-14	0.301391	86.4213	30	783	regulation of metabolic process	under	BP	norm2290
GO:0016070	5.46e-14	0.402315	129.025	60	1169	RNA metabolic process	under	BP	norm2290
GO:0051171	5.54e-14	0.293972	82.779	28	750	regulation of nitrogen compound metabolic process	under	BP	norm2290
GO:0050794	3.71e-12	0.543601	224.607	142	2035	regulation of cellular process	under	BP	norm2290
GO:0015074	6.99e-12	0.0319875	27.1515	1	246	DNA integration	under	BP	norm2290
GO:0050789	9.7e-12	0.554767	229.795	148	2082	regulation of biological process	under	BP	norm2290
GO:0007186	2.22e-11	0.139069	37.7472	6	342	G-protein coupled receptor signaling pathway	under	BP	norm2290
GO:0051716	2.9e-11	0.498894	157.832	90	1430	cellular response to stimulus	under	BP	norm2290
GO:0009059	6.65e-10	0.558786	187.191	119	1696	macromolecule biosynthetic process	under	BP	norm2290
GO:0034645	7.84e-10	0.560092	186.86	119	1693	cellular macromolecule biosynthetic process	under	BP	norm2290
GO:0034654	2.22e-09	0.487901	118.54	65	1074	nucleobase-containing compound biosynthetic process	under	BP	norm2290
GO:0007165	3.94e-09	0.511147	128.915	74	1168	signal transduction	under	BP	norm2290
GO:0006310	4.44e-09	0.074658	23.5092	2	213	DNA recombination	under	BP	norm2290
GO:0007154	3.47e-08	0.544017	133.44	81	1209	cell communication	under	BP	norm2290
GO:0023052	3.83e-08	0.541636	130.791	79	1185	signaling	under	BP	norm2290
GO:0065007	4.71e-08	0.63721	238.845	172	2164	biological regulation	under	BP	norm2290
GO:0032259	8.64e-08	0.116622	22.7366	3	206	methylation	under	BP	norm2290
GO:0006304	1.99e-07	0	14.4587	0	131	DNA modification	under	BP	norm2290
GO:0006305	3.6e-07	0	13.9069	0	126	DNA alkylation	under	BP	norm2290
GO:0006306	3.6e-07	0	13.9069	0	126	DNA methylation	under	BP	norm2290
GO:0044728	3.6e-07	0	13.9069	0	126	DNA methylation or demethylation	under	BP	norm2290
GO:0050896	3.8e-07	0.622203	179.244	124	1624	response to stimulus	under	BP	norm2290
GO:0019438	5.2e-07	0.566488	123.065	77	1115	aromatic compound biosynthetic process	under	BP	norm2290
GO:0055085	9.29e-07	0.477413	74.17	39	672	transmembrane transport	under	BP	norm2290
GO:0018130	2.05e-06	0.589923	124.941	81	1132	heterocycle biosynthetic process	under	BP	norm2290
GO:1901362	2.98e-06	0.597929	126.486	83	1146	organic cyclic compound biosynthetic process	under	BP	norm2290
GO:0006807	3.48e-06	0.743182	511.354	442	4633	nitrogen compound metabolic process	under	BP	norm2290
GO:0043414	6e-06	0.146854	18.2114	3	165	macromolecule methylation	under	BP	norm2290
GO:0006022	1.64e-05	0.068608	12.9135	1	117	aminoglycan metabolic process	under	BP	norm2290
GO:0009451	0.000384168	0	7.39493	0	67	RNA modification	under	BP	norm2290
GO:0006974	0.000505203	0.420595	28.476	13	258	cellular response to DNA damage stimulus	under	BP	norm2290
GO:0033554	0.000526024	0.433325	29.8005	14	270	cellular response to stress	under	BP	norm2290
GO:0044238	0.000617899	0.808548	544.134	494	4930	primary metabolic process	under	BP	norm2290
GO:0010467	0.000675842	0.733316	165.337	130	1498	gene expression	under	BP	norm2290
GO:0006366	0.000821628	0.0999057	8.94014	1	81	transcription by RNA polymerase II	under	BP	norm2290
GO:0034470	0.00106263	0.169932	10.5957	2	96	ncRNA processing	under	BP	norm2290
GO:0006281	0.00107531	0.440949	27.2619	13	247	DNA repair	under	BP	norm2290
GO:0030203	0.00110864	0	6.40158	0	58	glycosaminoglycan metabolic process	under	BP	norm2290
GO:0019058	0.00124711	0	6.29121	0	57	viral life cycle	under	BP	norm2290
GO:0030001	0.00127749	0.433247	25.6063	12	232	metal ion transport	under	BP	norm2290
GO:0044419	0.00139794	0.106629	8.38828	1	76	interspecies interaction between organisms	under	BP	norm2290
GO:0009719	0.00155402	0.108083	8.2779	1	75	response to endogenous stimulus	under	BP	norm2290
GO:0071495	0.00172725	0.109576	8.16753	1	74	cellular response to endogenous stimulus	under	BP	norm2290
GO:0044249	0.00193289	0.786939	232.664	196	2108	cellular biosynthetic process	under	BP	norm2290
GO:0006357	0.00224587	0	5.73935	0	52	regulation of transcription by RNA polymerase II	under	BP	norm2290
GO:0006820	0.00232661	0.185915	9.71274	2	88	anion transport	under	BP	norm2290
GO:1901576	0.00265898	0.795026	236.638	201	2144	organic substance biosynthetic process	under	BP	norm2290
GO:0000270	0.00284142	0	5.5186	0	50	peptidoglycan metabolic process	under	BP	norm2290
GO:0043412	0.00294408	0.730453	116.222	90	1053	macromolecule modification	under	BP	norm2290
GO:0044237	0.0030034	0.832905	481.443	439	4362	cellular metabolic process	under	BP	norm2290
GO:0051726	0.00319597	0	5.40823	0	49	regulation of cell cycle	under	BP	norm2290
GO:0044403	0.00399828	0.123178	7.28456	1	66	symbiont process	under	BP	norm2290
GO:0051704	0.00419731	0.255138	10.7061	3	97	multi-organism process	under	BP	norm2290
GO:0006026	0.00443687	0.125118	7.17418	1	65	aminoglycan catabolic process	under	BP	norm2290
GO:0071554	0.00454749	0	5.07711	0	46	cell wall organization or biogenesis	under	BP	norm2290
GO:0006814	0.00456421	0.202556	8.94014	2	81	sodium ion transport	under	BP	norm2290
GO:0016032	0.00492259	0.127119	7.06381	1	64	viral process	under	BP	norm2290
GO:0071310	0.00502038	0.205177	8.82977	2	80	cellular response to organic substance	under	BP	norm2290
GO:0009058	0.00505327	0.811666	244.364	211	2214	biosynthetic process	under	BP	norm2290
GO:0006352	0.00546035	0.129184	6.95344	1	63	DNA-templated transcription, initiation	under	BP	norm2290
GO:0044036	0.00575249	0	4.85637	0	44	cell wall macromolecule metabolic process	under	BP	norm2290
GO:0018142	0.00575249	0	4.85637	0	44	protein-DNA covalent cross-linking	under	BP	norm2290
GO:0018143	0.00575249	0	4.85637	0	44	nucleic acid-protein covalent cross-linking	under	BP	norm2290
GO:0007018	0.00639839	0.401971	16.1143	7	146	microtubule-based movement	under	BP	norm2290
GO:0006811	0.00669165	0.683666	65.1195	47	590	ion transport	under	BP	norm2290
GO:0009725	0.00671426	0.133522	6.7327	1	61	response to hormone	under	BP	norm2290
GO:0071704	0.00715937	0.850811	569.078	531	5156	organic substance metabolic process	under	BP	norm2290
GO:0007166	0.00718258	0.42846	17.3284	8	157	cell surface receptor signaling pathway	under	BP	norm2290
GO:0006027	0.00727641	0	4.63563	0	42	glycosaminoglycan catabolic process	under	BP	norm2290
GO:0009253	0.00727641	0	4.63563	0	42	peptidoglycan catabolic process	under	BP	norm2290
GO:0032870	0.00744291	0.135801	6.62232	1	60	cellular response to hormone stimulus	under	BP	norm2290
GO:0008033	0.00744291	0.135801	6.62232	1	60	tRNA processing	under	BP	norm2290
GO:0009187	0.0080501	0.219359	8.2779	2	75	cyclic nucleotide metabolic process	under	BP	norm2290
GO:0009262	0.00818351	0	4.52525	0	41	deoxyribonucleotide metabolic process	under	BP	norm2290
GO:0048545	0.00824876	0.138159	6.51195	1	59	response to steroid hormone	under	BP	norm2290
GO:0071396	0.00824876	0.138159	6.51195	1	59	cellular response to lipid	under	BP	norm2290
GO:0071383	0.00824876	0.138159	6.51195	1	59	cellular response to steroid hormone stimulus	under	BP	norm2290
GO:0006030	0.00824876	0.138159	6.51195	1	59	chitin metabolic process	under	BP	norm2290
GO:0043401	0.00824876	0.138159	6.51195	1	59	steroid hormone mediated signaling pathway	under	BP	norm2290
GO:0009755	0.00824876	0.138159	6.51195	1	59	hormone-mediated signaling pathway	under	BP	norm2290
GO:0033993	0.00824876	0.138159	6.51195	1	59	response to lipid	under	BP	norm2290
GO:0009190	0.00883971	0.222432	8.16753	2	74	cyclic nucleotide biosynthetic process	under	BP	norm2290
GO:0016567	0.0101244	0.143126	6.29121	1	57	protein ubiquitination	under	BP	norm2290
GO:0006261	0.0101244	0.143126	6.29121	1	57	DNA-dependent DNA replication	under	BP	norm2290
GO:0010941	0.0103506	0	4.30451	0	39	regulation of cell death	under	BP	norm2290
GO:0043067	0.0116405	0	4.19414	0	38	regulation of programmed cell death	under	BP	norm2290
GO:0016998	0.0116405	0	4.19414	0	38	cell wall macromolecule catabolic process	under	BP	norm2290
GO:0042981	0.0116405	0	4.19414	0	38	regulation of apoptotic process	under	BP	norm2290
GO:1901136	0.014252	0.300283	9.16088	3	83	carbohydrate derivative catabolic process	under	BP	norm2290
GO:0070887	0.0155136	0.30412	9.05051	3	82	cellular response to chemical stimulus	under	BP	norm2290
GO:0009394	0.0165559	0	3.86302	0	35	2'-deoxyribonucleotide metabolic process	under	BP	norm2290
GO:0019692	0.0165559	0	3.86302	0	35	deoxyribose phosphate metabolic process	under	BP	norm2290
GO:0009219	0.0186182	0	3.75265	0	34	pyrimidine deoxyribonucleotide metabolic process	under	BP	norm2290
GO:0007167	0.020937	0	3.64228	0	33	enzyme linked receptor protein signaling pathway	under	BP	norm2290
GO:0042221	0.0222384	0.503078	16.7766	9	152	response to chemical	under	BP	norm2290
GO:0010033	0.0232425	0.408453	11.3683	5	103	response to organic substance	under	BP	norm2290
GO:0015711	0.02512	0.170714	5.29786	1	48	organic anion transport	under	BP	norm2290
GO:0006040	0.0264743	0.267296	6.84307	2	62	amino sugar metabolic process	under	BP	norm2290
GO:0015698	0.0297722	0	3.31116	0	30	inorganic anion transport	under	BP	norm2290
GO:0019068	0.0297722	0	3.31116	0	30	virion assembly	under	BP	norm2290
GO:0014070	0.0301545	0.338706	8.16753	3	74	response to organic cyclic compound	under	BP	norm2290
GO:0000278	0.0306372	0.178343	5.07711	1	46	mitotic cell cycle	under	BP	norm2290
GO:0007049	0.0313647	0.482987	13.5758	7	123	cell cycle	under	BP	norm2290
GO:1901071	0.0316182	0.276578	6.62232	2	60	glucosamine-containing compound metabolic process	under	BP	norm2290
GO:0071407	0.0316182	0.276578	6.62232	2	60	cellular response to organic cyclic compound	under	BP	norm2290
GO:0032446	0.0316182	0.276578	6.62232	2	60	protein modification by small protein conjugation	under	BP	norm2290
GO:0006928	0.0355483	0.563834	18.4321	11	167	movement of cell or subcellular component	under	BP	norm2290
GO:0006313	0.0376456	0	3.09042	0	28	transposition, DNA-mediated	under	BP	norm2290
GO:0032196	0.0376456	0	3.09042	0	28	transposition	under	BP	norm2290
GO:0018205	0.0423309	0	2.98005	0	27	peptidyl-lysine modification	under	BP	norm2290
GO:0198738	0.0453744	0.195835	4.63563	1	42	cell-cell signaling by wnt	under	BP	norm2290
GO:1905114	0.0453744	0.195835	4.63563	1	42	cell surface receptor signaling pathway involved in cell-cell signaling	under	BP	norm2290
GO:0016055	0.0453744	0.195835	4.63563	1	42	Wnt signaling pathway	under	BP	norm2290
GO:0016020	1.12e-25	0.382309	305.286	190	2768	membrane	under	CC	norm2290
GO:0016021	8.57e-24	0.317696	172.716	76	1566	integral component of membrane	under	CC	norm2290
GO:0031224	2.43e-23	0.322552	172.826	77	1567	intrinsic component of membrane	under	CC	norm2290
GO:0044425	3.41e-11	0.510989	190.142	123	1724	membrane part	under	CC	norm2290
GO:0019012	3.3e-07	0	13.8967	0	126	virion	under	CC	norm2290
GO:0044423	3.3e-07	0	13.8967	0	126	virion part	under	CC	norm2290
GO:0019028	3.73e-07	0	13.7864	0	125	viral capsid	under	CC	norm2290
GO:0031981	0.0164409	0.418262	13.2349	6	120	nuclear lumen	under	CC	norm2290
GO:0044441	0.0296993	0	3.30874	0	30	ciliary part	under	CC	norm2290
GO:0120038	0.0296993	0	3.30874	0	30	plasma membrane bounded cell projection part	under	CC	norm2290
GO:0044463	0.0296993	0	3.30874	0	30	cell projection part	under	CC	norm2290
GO:0005634	0.0350188	0.761494	69.5937	56	631	nucleus	under	CC	norm2290
GO:0005667	0.0375722	0	3.08815	0	28	transcription factor complex	under	CC	norm2290
GO:0034705	0.0422581	0	2.97786	0	27	potassium channel complex	under	CC	norm2290
GO:0008076	0.0422581	0	2.97786	0	27	voltage-gated potassium channel complex	under	CC	norm2290
GO:0005815	0.0498495	0.200226	4.52194	1	41	microtubule organizing center	under	CC	norm2290
GO:0003677	1.11e-28	0.258329	158.008	48	1497	DNA binding	under	MF	norm2290
GO:0060089	1.98e-17	0.111722	54.8858	7	520	molecular transducer activity	under	MF	norm2290
GO:0038023	2.2e-17	0.111949	54.7803	7	519	signaling receptor activity	under	MF	norm2290
GO:0004930	1.13e-15	0.0245325	35.6758	1	338	G-protein coupled receptor activity	under	MF	norm2290
GO:0003676	2.26e-15	0.549823	297.228	187	2816	nucleic acid binding	under	MF	norm2290
GO:0004888	2.62e-15	0.110904	47.6029	6	451	transmembrane signaling receptor activity	under	MF	norm2290
GO:0140097	7.9e-13	0.16745	47.7084	9	452	catalytic activity, acting on DNA	under	MF	norm2290
GO:0004871	1.42e-12	0.246469	61.5354	17	583	signal transducer activity	under	MF	norm2290
GO:0043565	1.82e-09	0.178344	35.148	7	333	sequence-specific DNA binding	under	MF	norm2290
GO:0003700	1.53e-07	0.256876	35.2536	10	334	DNA binding transcription factor activity	under	MF	norm2290
GO:0008168	1.76e-07	0.295234	40.0033	13	379	methyltransferase activity	under	MF	norm2290
GO:0004518	2.96e-07	0.216251	29.2373	7	277	nuclease activity	under	MF	norm2290
GO:0016779	2.96e-07	0.216251	29.2373	7	277	nucleotidyltransferase activity	under	MF	norm2290
GO:0140110	3.08e-07	0.301152	39.2645	13	372	transcription regulator activity	under	MF	norm2290
GO:0008170	8.28e-07	0	13.1937	0	125	N-methyltransferase activity	under	MF	norm2290
GO:0004386	1.01e-05	0.274191	26.5985	8	252	helicase activity	under	MF	norm2290
GO:0008270	1.32e-05	0.590158	101.117	64	958	zinc ion binding	under	MF	norm2290
GO:0016741	2.93e-05	0.422459	41.5866	19	394	transferase activity, transferring one-carbon groups	under	MF	norm2290
GO:0046873	4.68e-05	0.315237	26.1763	9	248	metal ion transmembrane transporter activity	under	MF	norm2290
GO:0016893	5.3e-05	0	9.28837	0	88	endonuclease activity, active with either ribo- or deoxyribonucleic acids and producing 5'-phosphomonoesters	under	MF	norm2290
GO:0034061	7.76e-05	0.0786188	11.3994	1	108	DNA polymerase activity	under	MF	norm2290
GO:0005261	0.000110374	0.245411	18.5767	5	176	cation channel activity	under	MF	norm2290
GO:0005215	0.000116228	0.643122	106.711	73	1011	transporter activity	under	MF	norm2290
GO:0004519	0.00022692	0.284562	19.3156	6	183	endonuclease activity	under	MF	norm2290
GO:0022857	0.000414844	0.631917	82.1176	55	778	transmembrane transporter activity	under	MF	norm2290
GO:0003887	0.000494576	0.0946465	9.49947	1	90	DNA-directed DNA polymerase activity	under	MF	norm2290
GO:0005272	0.000498941	0	7.17738	0	68	sodium channel activity	under	MF	norm2290
GO:0097747	0.000671328	0.0979701	9.18282	1	87	RNA polymerase activity	under	MF	norm2290
GO:0034062	0.000671328	0.0979701	9.18282	1	87	5'-3' RNA polymerase activity	under	MF	norm2290
GO:0003697	0.000781124	0	6.75518	0	64	single-stranded DNA binding	under	MF	norm2290
GO:0022803	0.000875274	0.512389	38.4201	21	364	passive transmembrane transporter activity	under	MF	norm2290
GO:0015267	0.000875274	0.512389	38.4201	21	364	channel activity	under	MF	norm2290
GO:0022838	0.00115669	0.520167	37.8923	21	359	substrate-specific channel activity	under	MF	norm2290
GO:0005216	0.00115669	0.520167	37.8923	21	359	ion channel activity	under	MF	norm2290
GO:0008080	0.00122274	0	6.33298	0	60	N-acetyltransferase activity	under	MF	norm2290
GO:0008408	0.00152976	0	6.12188	0	58	3'-5' exonuclease activity	under	MF	norm2290
GO:0003678	0.00155741	0.302635	15.1992	5	144	DNA helicase activity	under	MF	norm2290
GO:0046914	0.00177291	0.728506	124.126	95	1176	transition metal ion binding	under	MF	norm2290
GO:0015081	0.00182714	0.273757	13.4048	4	127	sodium ion transmembrane transporter activity	under	MF	norm2290
GO:0004536	0.00249044	0.115529	7.81067	1	74	deoxyribonuclease activity	under	MF	norm2290
GO:0016888	0.00299504	0	5.48858	0	52	endodeoxyribonuclease activity, producing 5'-phosphomonoesters	under	MF	norm2290
GO:0016740	0.00331532	0.793516	200.861	167	1903	transferase activity	under	MF	norm2290
GO:0001653	0.00334981	0	5.38303	0	51	peptide receptor activity	under	MF	norm2290
GO:0008528	0.00334981	0	5.38303	0	51	G-protein coupled peptide receptor activity	under	MF	norm2290
GO:0004527	0.00409627	0.12407	7.28293	1	69	exonuclease activity	under	MF	norm2290
GO:0005267	0.00608027	0.131864	6.86073	1	65	potassium channel activity	under	MF	norm2290
GO:0042624	0.00733246	0	4.64418	0	44	ATPase activity, uncoupled	under	MF	norm2290
GO:0015291	0.00780571	0.321119	11.5049	4	109	secondary active transmembrane transporter activity	under	MF	norm2290
GO:0016788	0.00851257	0.70891	71.5627	53	678	hydrolase activity, acting on ester bonds	under	MF	norm2290
GO:0003777	0.00888427	0.391855	14.2492	6	135	microtubule motor activity	under	MF	norm2290
GO:0016758	0.0104079	0.446178	16.7824	8	159	transferase activity, transferring hexosyl groups	under	MF	norm2290
GO:0004520	0.010931	0.14557	6.22743	1	59	endodeoxyribonuclease activity	under	MF	norm2290
GO:0015294	0.010931	0.14557	6.22743	1	59	solute:cation symporter activity	under	MF	norm2290
GO:0003899	0.010931	0.14557	6.22743	1	59	DNA-directed 5'-3' RNA polymerase activity	under	MF	norm2290
GO:0008509	0.0111411	0.231203	7.91622	2	75	anion transmembrane transporter activity	under	MF	norm2290
GO:0003724	0.0114707	0	4.22199	0	40	RNA helicase activity	under	MF	norm2290
GO:0008061	0.0114707	0	4.22199	0	40	chitin binding	under	MF	norm2290
GO:0016849	0.0121661	0.234432	7.81067	2	74	phosphorus-oxygen lyase activity	under	MF	norm2290
GO:0046872	0.0178478	0.862166	302.294	271	2864	metal ion binding	under	MF	norm2290
GO:0016891	0.0179423	0	3.79979	0	36	endoribonuclease activity, producing 5'-phosphomonoesters	under	MF	norm2290
GO:0005249	0.0179423	0	3.79979	0	36	voltage-gated potassium channel activity	under	MF	norm2290
GO:0019787	0.0196957	0.316493	8.76062	3	83	ubiquitin-like protein transferase activity	under	MF	norm2290
GO:0043169	0.0199281	0.865534	305.777	275	2897	cation binding	under	MF	norm2290
GO:0015079	0.0204972	0.255858	7.17738	2	68	potassium ion transmembrane transporter activity	under	MF	norm2290
GO:0015293	0.0223334	0.259814	7.07183	2	67	symporter activity	under	MF	norm2290
GO:0009008	0.0250932	0	3.48314	0	33	DNA-methyltransferase activity	under	MF	norm2290
GO:0016987	0.0250932	0	3.48314	0	33	bacterial sigma factor activity	under	MF	norm2290
GO:0000990	0.0250932	0	3.48314	0	33	transcription factor activity, core RNA polymerase binding	under	MF	norm2290
GO:0000996	0.0250932	0	3.48314	0	33	promoter selection factor activity	under	MF	norm2290
GO:0008378	0.0280614	0	3.37759	0	32	galactosyltransferase activity	under	MF	norm2290
GO:0016407	0.0288277	0.272447	6.75518	2	64	acetyltransferase activity	under	MF	norm2290
GO:0015075	0.0310897	0.755743	65.1241	51	617	ion transmembrane transporter activity	under	MF	norm2290
GO:0015370	0.0313252	0.179787	5.06638	1	48	solute:sodium symporter activity	under	MF	norm2290
GO:0005328	0.0313252	0.179787	5.06638	1	48	neurotransmitter:sodium symporter activity	under	MF	norm2290
GO:0016410	0.0313647	0.276934	6.64963	2	63	N-acyltransferase activity	under	MF	norm2290
GO:0008173	0.0313804	0	3.27204	0	31	RNA methyltransferase activity	under	MF	norm2290
GO:0004842	0.0315274	0.342308	8.12732	3	77	ubiquitin-protein transferase activity	under	MF	norm2290
GO:0046983	0.0339956	0.547427	17.3101	10	164	protein dimerization activity	under	MF	norm2290
GO:0140098	0.0349428	0.675303	34.0925	24	323	catalytic activity, acting on RNA	under	MF	norm2290
GO:0015318	0.0360762	0.758682	62.3798	49	591	inorganic molecular entity transmembrane transporter activity	under	MF	norm2290
GO:0004252	0.0395467	0.572452	18.2601	11	173	serine-type endopeptidase activity	under	MF	norm2290
GO:0061783	0.0414855	0.192088	4.74973	1	45	peptidoglycan muralytic activity	under	MF	norm2290
GO:0000988	0.0428046	0.361977	7.70512	3	73	transcription factor activity, protein binding	under	MF	norm2290
GO:0008417	0.0438821	0	2.95539	0	28	fucosyltransferase activity	under	MF	norm2290
GO:0003968	0.0438821	0	2.95539	0	28	RNA-directed 5'-3' RNA polymerase activity	under	MF	norm2290
GO:0097159	0.0452496	0.904453	484.79	455	4593	organic cyclic compound binding	under	MF	norm2290
GO:0003707	0.0455261	0.196569	4.64418	1	44	steroid hormone receptor activity	under	MF	norm2290
GO:1901363	0.0470008	0.9054	484.473	455	4590	heterocyclic compound binding	under	MF	norm2290
GO:0004803	0.0490708	0	2.84984	0	27	transposase activity	under	MF	norm2290
