# Supplementary material for: Combined transcriptome and proteome profiling reveals specific molecular brain signatures for sex, maturation and circalunar clock phase
Source: eLife. 2019 Feb 15;8:e41556. doi: 10.7554/eLife.41556 (PMC6377233; doi:10.7554/eLife.41556)
Supplement: Figure 5—source data 4. — Table containing the over-and under-represented GO-terms using all 3,847 proteins deteced in the unlabelled proteome dataset. GO-terms are shown with their respective p-values, ontology (Molecular Function, Biological Process, Cellular Compartment), and test direction, i.e. over- or under-represented. [file elife-41556-fig5-data4.xlsx]

## Sheet: OVER
GOMFID	Pvalue	OddsRatio	ExpCount	Count	Size	Term	test	ontology	subset
GO:0005515	6.71e-17	1.50287	610.342	776	3710	protein binding	over	MF	norm3847
GO:0005509	2.83e-16	2.27381	91.4182	167	548	calcium ion binding	over	MF	norm3847
GO:0001883	6.18e-16	3.07596	42.7063	96	256	purine nucleoside binding	over	MF	norm3847
GO:0005525	6.18e-16	3.07596	42.7063	96	256	GTP binding	over	MF	norm3847
GO:0019001	1.96e-15	2.99997	43.3736	96	260	guanyl nucleotide binding	over	MF	norm3847
GO:0032549	3.53e-15	2.94157	44.3745	97	266	ribonucleoside binding	over	MF	norm3847
GO:0000166	2.65e-13	1.56708	310.888	424	1884	nucleotide binding	over	MF	norm3847
GO:0003924	1.62e-10	4.30315	14.5135	40	87	GTPase activity	over	MF	norm3847
GO:0016491	2.52e-10	1.90024	93.198	151	570	oxidoreductase activity	over	MF	norm3847
GO:0043168	9.93e-10	1.48968	270.603	359	1652	anion binding	over	MF	norm3847
GO:0032555	1.48e-08	1.45063	266.914	348	1600	purine ribonucleotide binding	over	MF	norm3847
GO:0097367	7.8e-08	1.41397	279.852	358	1679	carbohydrate derivative binding	over	MF	norm3847
GO:0016616	3.56e-07	4.34715	8.99402	25	54	oxidoreductase activity, acting on the CH-OH group of donors, NAD or NADP as acceptor	over	MF	norm3847
GO:0003995	4.25e-07	15.0504	2.66914	12	16	acyl-CoA dehydrogenase activity	over	MF	norm3847
GO:0051015	7.52e-07	10.8723	3.16961	13	19	actin filament binding	over	MF	norm3847
GO:0005200	8.37e-06	7.24649	3.67007	13	22	structural constituent of cytoskeleton	over	MF	norm3847
GO:0051287	1.63e-05	3.56691	8.84154	22	53	NAD binding	over	MF	norm3847
GO:0051082	5.35e-05	2.842	12.0112	26	72	unfolded protein binding	over	MF	norm3847
GO:0003779	5.46e-05	3.31249	8.80691	21	53	actin binding	over	MF	norm3847
GO:0016835	9.39e-05	3.40728	7.84061	19	47	carbon-oxygen lyase activity	over	MF	norm3847
GO:0019825	0.000102124	7.15941	2.83597	10	17	oxygen binding	over	MF	norm3847
GO:0050660	0.000115485	2.61057	13.1789	27	79	flavin adenine dinucleotide binding	over	MF	norm3847
GO:0004364	0.0001287	30.0359	1.16775	6	7	glutathione transferase activity	over	MF	norm3847
GO:0003810	0.000128772	Inf	0.834108	5	5	protein-glutamine gamma-glutamyltransferase activity	over	MF	norm3847
GO:0098772	0.000135947	1.7773	40.3708	63	242	molecular function regulator	over	MF	norm3847
GO:0019842	0.000169538	2.27449	17.6831	33	106	vitamin binding	over	MF	norm3847
GO:0004674	0.000197956	2.68189	11.5031	24	69	protein serine/threonine kinase activity	over	MF	norm3847
GO:0060589	0.000232761	3.22665	7.67379	18	46	nucleoside-triphosphatase regulator activity	over	MF	norm3847
GO:0004298	0.000233423	4.34581	4.671	13	28	threonine-type endopeptidase activity	over	MF	norm3847
GO:0003743	0.000235767	3.76231	5.83875	15	35	translation initiation factor activity	over	MF	norm3847
GO:0016853	0.000340344	1.99381	23.5218	40	141	isomerase activity	over	MF	norm3847
GO:0004857	0.000560009	2.56903	10.8434	22	65	enzyme inhibitor activity	over	MF	norm3847
GO:0004435	0.000629557	8.76187	1.83504	7	11	phosphatidylinositol phospholipase C activity	over	MF	norm3847
GO:0003723	0.000704513	1.46562	76.5051	103	459	RNA binding	over	MF	norm3847
GO:0061134	0.000751252	2.64171	9.67565	20	58	peptidase regulator activity	over	MF	norm3847
GO:0004075	0.000772937	Inf	0.667286	4	4	biotin carboxylase activity	over	MF	norm3847
GO:0022853	0.000810639	4.24024	4.00372	11	24	active ion transmembrane transporter activity	over	MF	norm3847
GO:0019829	0.000810639	4.24024	4.00372	11	24	cation-transporting ATPase activity	over	MF	norm3847
GO:0019205	0.000876462	3.34267	5.83875	14	35	nucleobase-containing compound kinase activity	over	MF	norm3847
GO:0005544	0.00113702	10.0104	1.50139	6	9	calcium-dependent phospholipid binding	over	MF	norm3847
GO:0004089	0.00129333	7.00894	2.00186	7	12	carbonate dehydratase activity	over	MF	norm3847
GO:0016614	0.00142216	4.21519	3.64076	10	22	oxidoreductase activity, acting on CH-OH group of donors	over	MF	norm3847
GO:0003755	0.00143106	3.5376	4.83783	12	29	peptidyl-prolyl cis-trans isomerase activity	over	MF	norm3847
GO:0008483	0.00214894	5.00719	2.66914	8	16	transaminase activity	over	MF	norm3847
GO:0051536	0.00235721	2.17818	12.6784	23	76	iron-sulfur cluster binding	over	MF	norm3847
GO:0004867	0.00260623	3.44437	4.50418	11	27	serine-type endopeptidase inhibitor activity	over	MF	norm3847
GO:0030170	0.00272628	2.24193	11.3439	21	68	pyridoxal phosphate binding	over	MF	norm3847
GO:0003746	0.00284094	4.09744	3.33643	9	20	translation elongation factor activity	over	MF	norm3847
GO:0005543	0.00290233	2.81303	6.49439	14	39	phospholipid binding	over	MF	norm3847
GO:0005096	0.00291993	2.9614	5.83875	13	35	GTPase activator activity	over	MF	norm3847
GO:0016805	0.0033496	20.008	0.834108	4	5	dipeptidase activity	over	MF	norm3847
GO:0004017	0.0033496	20.008	0.834108	4	5	adenylate kinase activity	over	MF	norm3847
GO:0004866	0.00341213	4.4644	2.82862	8	17	endopeptidase inhibitor activity	over	MF	norm3847
GO:0008137	0.00346999	4.45048	2.83597	8	17	NADH dehydrogenase (ubiquinone) activity	over	MF	norm3847
GO:0016655	0.00346999	4.45048	2.83597	8	17	oxidoreductase activity, acting on NAD(P)H, quinone or similar compound as acceptor	over	MF	norm3847
GO:0005506	0.004042	1.68978	26.5246	40	159	iron ion binding	over	MF	norm3847
GO:0016597	0.00461513	6.00527	1.83504	6	11	amino acid binding	over	MF	norm3847
GO:0016790	0.00461513	6.00527	1.83504	6	11	thiolester hydrolase activity	over	MF	norm3847
GO:0016868	0.0046164	8.33865	1.33457	5	8	intramolecular transferase activity, phosphotransferases	over	MF	norm3847
GO:0051920	0.0046164	8.33865	1.33457	5	8	peroxiredoxin activity	over	MF	norm3847
GO:0030791	0.00463793	Inf	0.500465	3	3	arsenite methyltransferase activity	over	MF	norm3847
GO:0031543	0.00463793	Inf	0.500465	3	3	peptidyl-proline dioxygenase activity	over	MF	norm3847
GO:0004656	0.00463793	Inf	0.500465	3	3	procollagen-proline 4-dioxygenase activity	over	MF	norm3847
GO:0004450	0.00463793	Inf	0.500465	3	3	isocitrate dehydrogenase (NADP+) activity	over	MF	norm3847
GO:0015296	0.00463793	Inf	0.500465	3	3	anion:cation symporter activity	over	MF	norm3847
GO:0004449	0.00463793	Inf	0.500465	3	3	isocitrate dehydrogenase (NAD+) activity	over	MF	norm3847
GO:0008289	0.00475624	2.61372	6.80694	14	41	lipid binding	over	MF	norm3847
GO:0016301	0.00485954	1.36704	77.4808	99	467	kinase activity	over	MF	norm3847
GO:0031406	0.00528616	4.01313	2.99781	8	18	carboxylic acid binding	over	MF	norm3847
GO:0003954	0.00534189	4.00511	3.00279	8	18	NADH dehydrogenase activity	over	MF	norm3847
GO:0009055	0.00623355	2.00658	12.8453	22	77	electron transfer activity	over	MF	norm3847
GO:0016763	0.00653742	2.24456	9.1691	17	55	transferase activity, transferring pentosyl groups	over	MF	norm3847
GO:0005516	0.00896563	6.25349	1.50139	5	9	calmodulin binding	over	MF	norm3847
GO:0016880	0.0100815	3.89261	2.66914	7	16	acid-ammonia (or amide) ligase activity	over	MF	norm3847
GO:0004356	0.0100815	3.89261	2.66914	7	16	glutamate-ammonia ligase activity	over	MF	norm3847
GO:0004620	0.0112644	3.33706	3.33643	8	20	phospholipase activity	over	MF	norm3847
GO:0015293	0.0114791	1.9844	11.177	19	67	symporter activity	over	MF	norm3847
GO:0016903	0.0117676	3.00383	4.00372	9	24	oxidoreductase activity, acting on the aldehyde or oxo group of donors	over	MF	norm3847
GO:0020037	0.0118191	1.54859	29.027	41	174	heme binding	over	MF	norm3847
GO:0004177	0.0147096	3.50307	2.83597	7	17	aminopeptidase activity	over	MF	norm3847
GO:0019200	0.0154339	5.00758	1.66678	5	10	carbohydrate kinase activity	over	MF	norm3847
GO:0019899	0.0154722	1.69307	17.8499	27	107	enzyme binding	over	MF	norm3847
GO:0019904	0.0154901	5.00239	1.66822	5	10	protein domain specific binding	over	MF	norm3847
GO:0031683	0.0154901	5.00239	1.66822	5	10	G-protein beta/gamma-subunit complex binding	over	MF	norm3847
GO:0015662	0.0162329	15	0.667286	3	4	ATPase activity, coupled to transmembrane movement of ions, phosphorylative mechanism	over	MF	norm3847
GO:0019238	0.0162329	15	0.667286	3	4	cyclohydrolase activity	over	MF	norm3847
GO:0004471	0.0162329	15	0.667286	3	4	malate dehydrogenase (decarboxylating) (NAD+) activity	over	MF	norm3847
GO:0016773	0.016693	1.29846	77.3385	95	464	phosphotransferase activity, alcohol group as acceptor	over	MF	norm3847
GO:0030554	0.0170693	1.17355	224.542	253	1346	adenyl nucleotide binding	over	MF	norm3847
GO:0016668	0.0176658	6.66826	1.16775	4	7	oxidoreductase activity, acting on a sulfur group of donors, NAD(P) as acceptor	over	MF	norm3847
GO:0043022	0.0176658	6.66826	1.16775	4	7	ribosome binding	over	MF	norm3847
GO:0022834	0.0177405	1.5351	26.3578	37	158	ligand-gated channel activity	over	MF	norm3847
GO:0008641	0.0191107	3.75239	2.3355	6	14	ubiquitin-like modifier activating enzyme activity	over	MF	norm3847
GO:0004197	0.0204932	3.19073	2.99781	7	18	cysteine-type endopeptidase activity	over	MF	norm3847
GO:0005319	0.0206709	3.18436	3.00279	7	18	lipid transporter activity	over	MF	norm3847
GO:0005262	0.0209866	2.85988	3.67007	8	22	calcium channel activity	over	MF	norm3847
GO:0005328	0.0218102	2.06245	8.00743	14	48	neurotransmitter:sodium symporter activity	over	MF	norm3847
GO:0005524	0.0222898	1.16441	224.041	251	1343	ATP binding	over	MF	norm3847
GO:0016879	0.0233614	2.10789	7.31773	13	44	ligase activity, forming carbon-nitrogen bonds	over	MF	norm3847
GO:0000287	0.0236583	1.69566	15.1808	23	91	magnesium ion binding	over	MF	norm3847
GO:0005507	0.0239118	2.10013	7.34015	13	44	copper ion binding	over	MF	norm3847
GO:0002161	0.0245525	4.16833	1.83504	5	11	aminoacyl-tRNA editing activity	over	MF	norm3847
GO:0050662	0.0257959	1.65541	16.107	24	98	coenzyme binding	over	MF	norm3847
GO:0005230	0.0262322	1.50104	25.3569	35	152	extracellular ligand-gated ion channel activity	over	MF	norm3847
GO:0140096	0.0267054	1.15981	218.359	244	1314	catalytic activity, acting on a protein	over	MF	norm3847
GO:0048029	0.0273361	3.33866	2.50017	6	15	monosaccharide binding	over	MF	norm3847
GO:0004198	0.0275896	2.66901	3.8369	8	23	calcium-dependent cysteine-type endopeptidase activity	over	MF	norm3847
GO:0016874	0.0276716	1.52418	22.8988	32	138	ligase activity	over	MF	norm3847
GO:0044769	0.0277464	Inf	0.3332	2	2	ATPase activity, coupled to transmembrane movement of ions, rotational mechanism	over	MF	norm3847
GO:0030060	0.0278202	Inf	0.333643	2	2	L-malate dehydrogenase activity	over	MF	norm3847
GO:0015379	0.0278202	Inf	0.333643	2	2	potassium:chloride symporter activity	over	MF	norm3847
GO:0016885	0.0278202	Inf	0.333643	2	2	ligase activity, forming carbon-carbon bonds	over	MF	norm3847
GO:0005344	0.0278202	Inf	0.333643	2	2	oxygen carrier activity	over	MF	norm3847
GO:0004579	0.0278202	Inf	0.333643	2	2	dolichyl-diphosphooligosaccharide-protein glycotransferase activity	over	MF	norm3847
GO:0017056	0.0278202	Inf	0.333643	2	2	structural constituent of nuclear pore	over	MF	norm3847
GO:0004655	0.0278202	Inf	0.333643	2	2	porphobilinogen synthase activity	over	MF	norm3847
GO:0004375	0.0278202	Inf	0.333643	2	2	glycine dehydrogenase (decarboxylating) activity	over	MF	norm3847
GO:0004613	0.0278202	Inf	0.333643	2	2	phosphoenolpyruvate carboxykinase (GTP) activity	over	MF	norm3847
GO:0003980	0.0278202	Inf	0.333643	2	2	UDP-glucose:glycoprotein glucosyltransferase activity	over	MF	norm3847
GO:0005047	0.0278202	Inf	0.333643	2	2	signal recognition particle binding	over	MF	norm3847
GO:0004731	0.0278202	Inf	0.333643	2	2	purine-nucleoside phosphorylase activity	over	MF	norm3847
GO:0004739	0.0278202	Inf	0.333643	2	2	pyruvate dehydrogenase (acetyl-transferring) activity	over	MF	norm3847
GO:0004703	0.0278202	Inf	0.333643	2	2	G-protein coupled receptor kinase activity	over	MF	norm3847
GO:0005523	0.0278202	Inf	0.333643	2	2	tropomyosin binding	over	MF	norm3847
GO:0016748	0.0278202	Inf	0.333643	2	2	succinyltransferase activity	over	MF	norm3847
GO:0004822	0.0278202	Inf	0.333643	2	2	isoleucine-tRNA ligase activity	over	MF	norm3847
GO:0008144	0.0281552	1.5718	19.5555	28	119	drug binding	over	MF	norm3847
GO:0005086	0.0307152	5.0008	1.33457	4	8	ARF guanyl-nucleotide exchange factor activity	over	MF	norm3847
GO:1901681	0.0309209	2.27527	5.33829	10	32	sulfur compound binding	over	MF	norm3847
GO:0015036	0.0309209	2.27527	5.33829	10	32	disulfide oxidoreductase activity	over	MF	norm3847
GO:0005044	0.0321142	1.73087	12.3448	19	74	scavenger receptor activity	over	MF	norm3847
GO:0044877	0.0323028	2.38576	4.64649	9	28	protein-containing complex binding	over	MF	norm3847
GO:0016705	0.0349632	1.42842	29.3606	39	176	oxidoreductase activity, acting on paired donors, with incorporation or reduction of molecular oxygen	over	MF	norm3847
GO:0070011	0.0350484	1.21834	101.928	119	611	peptidase activity, acting on L-amino acid peptides	over	MF	norm3847
GO:0016615	0.0354938	7.50538	0.833555	3	5	malate dehydrogenase activity	over	MF	norm3847
GO:0008565	0.0355007	2.502	4.00372	8	24	protein transporter activity	over	MF	norm3847
GO:0016878	0.0355579	7.4994	0.834108	3	5	acid-thiol ligase activity	over	MF	norm3847
GO:0017069	0.0355579	7.4994	0.834108	3	5	snRNA binding	over	MF	norm3847
GO:0004396	0.0355579	7.4994	0.834108	3	5	hexokinase activity	over	MF	norm3847
GO:0046527	0.0355579	7.4994	0.834108	3	5	glucosyltransferase activity	over	MF	norm3847
GO:0004359	0.0355579	7.4994	0.834108	3	5	glutaminase activity	over	MF	norm3847
GO:0031369	0.0355579	7.4994	0.834108	3	5	translation initiation factor binding	over	MF	norm3847
GO:0042803	0.0355579	7.4994	0.834108	3	5	protein homodimerization activity	over	MF	norm3847
GO:0016405	0.0355579	7.4994	0.834108	3	5	CoA-ligase activity	over	MF	norm3847
GO:1901981	0.0355579	7.4994	0.834108	3	5	phosphatidylinositol phosphate binding	over	MF	norm3847
GO:0000149	0.0355579	7.4994	0.834108	3	5	SNARE binding	over	MF	norm3847
GO:0004000	0.0355579	7.4994	0.834108	3	5	adenosine deaminase activity	over	MF	norm3847
GO:0005536	0.0355579	7.4994	0.834108	3	5	glucose binding	over	MF	norm3847
GO:0005539	0.0355579	7.4994	0.834108	3	5	glycosaminoglycan binding	over	MF	norm3847
GO:0016861	0.0364208	3.57257	2.00186	5	12	intramolecular oxidoreductase activity, interconverting aldoses and ketoses	over	MF	norm3847
GO:0016742	0.0364208	3.57257	2.00186	5	12	hydroxymethyl-, formyl- and related transferase activity	over	MF	norm3847
GO:0016776	0.036973	2.69812	3.33223	7	20	phosphotransferase activity, phosphate group as acceptor	over	MF	norm3847
GO:0005201	0.0378612	3.00144	2.66914	6	16	extracellular matrix structural constituent	over	MF	norm3847
GO:0046961	0.0378612	3.00144	2.66914	6	16	proton-transporting ATPase activity, rotational mechanism	over	MF	norm3847
GO:0015085	0.047845	4.00864	1.4988	4	9	calcium ion transmembrane transporter activity	over	MF	norm3847
GO:0031625	0.0481149	4.00032	1.50139	4	9	ubiquitin protein ligase binding	over	MF	norm3847
GO:0016634	0.0481149	4.00032	1.50139	4	9	oxidoreductase activity, acting on the CH-CH group of donors, oxygen as acceptor	over	MF	norm3847
GO:0030145	0.0481149	4.00032	1.50139	4	9	manganese ion binding	over	MF	norm3847
GO:0055114	5.5e-13	1.85908	145.092	224	831	oxidation-reduction process	over	BP	norm3847
GO:0006082	5.43e-12	2.31831	62.6814	115	359	organic acid metabolic process	over	BP	norm3847
GO:0065008	4.12e-10	2.8962	29.3783	63	169	regulation of biological quality	over	BP	norm3847
GO:0070727	2.37e-09	2.7853	29.1582	61	167	cellular macromolecule localization	over	BP	norm3847
GO:0032535	4.22e-09	13.5209	4.0158	17	23	regulation of cellular component size	over	BP	norm3847
GO:0008064	5.88e-09	15.2635	3.6666	16	21	regulation of actin polymerization or depolymerization	over	BP	norm3847
GO:0032271	5.88e-09	15.2635	3.6666	16	21	regulation of protein polymerization	over	BP	norm3847
GO:0006457	9.9e-09	2.96441	23.3964	51	134	protein folding	over	BP	norm3847
GO:0007015	2.35e-08	6.57313	6.6348	22	38	actin filament organization	over	BP	norm3847
GO:0034622	3.35e-08	3.74273	13.9413	35	80	cellular protein-containing complex assembly	over	BP	norm3847
GO:0006886	4e-08	2.76179	24.9239	52	143	intracellular protein transport	over	BP	norm3847
GO:0015833	5.83e-08	2.4177	33.5232	64	192	peptide transport	over	BP	norm3847
GO:0016192	7.27e-08	3.09789	18.6704	42	108	vesicle-mediated transport	over	BP	norm3847
GO:0045184	1.15e-07	2.37845	33.3486	63	191	establishment of protein localization	over	BP	norm3847
GO:1902903	2.91e-07	8.47543	4.365	16	25	regulation of supramolecular fiber organization	over	BP	norm3847
GO:0032956	2.91e-07	8.47543	4.365	16	25	regulation of actin cytoskeleton organization	over	BP	norm3847
GO:0044087	3.69e-07	7.37041	4.8888	17	28	regulation of cellular component biogenesis	over	BP	norm3847
GO:0007264	7.56e-07	2.23279	34.2216	62	196	small GTPase mediated signal transduction	over	BP	norm3847
GO:0045454	9.09e-07	3.2275	14.3172	33	82	cell redox homeostasis	over	BP	norm3847
GO:0009161	1.92e-06	3.22694	13.4442	31	77	ribonucleoside monophosphate metabolic process	over	BP	norm3847
GO:0030163	2.66e-06	2.58514	20.952	42	120	protein catabolic process	over	BP	norm3847
GO:0022607	2.97e-06	2.13069	34.7454	61	199	cellular component assembly	over	BP	norm3847
GO:0031334	3.06e-06	13.0794	2.619	11	15	positive regulation of protein complex assembly	over	BP	norm3847
GO:0030838	3.06e-06	13.0794	2.619	11	15	positive regulation of actin filament polymerization	over	BP	norm3847
GO:0009168	3.53e-06	3.82222	9.42839	24	54	purine ribonucleoside monophosphate biosynthetic process	over	BP	norm3847
GO:0034314	5.8e-06	21.3824	1.9206	9	11	Arp2/3 complex-mediated actin nucleation	over	BP	norm3847
GO:0009126	7.69e-06	3.08248	12.9204	29	74	purine nucleoside monophosphate metabolic process	over	BP	norm3847
GO:0071705	9.19e-06	1.90914	44.3484	72	254	nitrogen compound transport	over	BP	norm3847
GO:0006163	1.63e-05	2.31774	23.0472	43	132	purine nucleotide metabolic process	over	BP	norm3847
GO:0010638	1.96e-05	8.7174	2.9682	11	17	positive regulation of organelle organization	over	BP	norm3847
GO:0009064	2.49e-05	4.76322	5.5872	16	32	glutamine family amino acid metabolic process	over	BP	norm3847
GO:0051188	7.12e-05	2.4334	17.0807	33	98	cofactor biosynthetic process	over	BP	norm3847
GO:0009259	7.49e-05	2.20213	22.1742	40	127	ribonucleotide metabolic process	over	BP	norm3847
GO:0006897	8.41e-05	12.6846	1.91777	8	11	endocytosis	over	BP	norm3847
GO:0046390	9.07e-05	2.3569	17.9838	34	103	ribose phosphate biosynthetic process	over	BP	norm3847
GO:0044283	0.000118988	2.27919	18.9178	35	109	small molecule biosynthetic process	over	BP	norm3847
GO:0009152	0.000142881	2.3201	17.6346	33	101	purine ribonucleotide biosynthetic process	over	BP	norm3847
GO:0009199	0.000151472	2.57815	13.4442	27	77	ribonucleoside triphosphate metabolic process	over	BP	norm3847
GO:0009144	0.000151472	2.57815	13.4442	27	77	purine nucleoside triphosphate metabolic process	over	BP	norm3847
GO:0006084	0.000161467	Inf	0.872999	5	5	acetyl-CoA metabolic process	over	BP	norm3847
GO:0018149	0.000161467	Inf	0.872999	5	5	peptide cross-linking	over	BP	norm3847
GO:0035383	0.000167485	28.4624	1.2222	6	7	thioester metabolic process	over	BP	norm3847
GO:0031333	0.000167485	28.4624	1.2222	6	7	negative regulation of protein complex assembly	over	BP	norm3847
GO:0030837	0.000167485	28.4624	1.2222	6	7	negative regulation of actin filament polymerization	over	BP	norm3847
GO:0006091	0.000185882	2.3511	16.4124	31	94	generation of precursor metabolites and energy	over	BP	norm3847
GO:0016999	0.000205904	4.16282	5.238	14	30	antibiotic metabolic process	over	BP	norm3847
GO:0051603	0.000224007	2.28228	17.2854	32	99	proteolysis involved in cellular protein catabolic process	over	BP	norm3847
GO:0009206	0.00028026	2.85967	9.77759	21	56	purine ribonucleoside triphosphate biosynthetic process	over	BP	norm3847
GO:0006334	0.000281863	5.2278	3.6666	11	21	nucleosome assembly	over	BP	norm3847
GO:0051640	0.000281863	5.2278	3.6666	11	21	organelle localization	over	BP	norm3847
GO:0046907	0.000317892	3.64932	6.00021	15	35	intracellular transport	over	BP	norm3847
GO:0044281	0.000332709	1.67457	45.7882	68	275	small molecule metabolic process	over	BP	norm3847
GO:0006793	0.000446017	1.34546	154.87	192	887	phosphorus metabolic process	over	BP	norm3847
GO:0006887	0.000475236	4.75195	3.8412	11	22	exocytosis	over	BP	norm3847
GO:0006730	0.000475421	7.59522	2.2698	8	13	one-carbon metabolic process	over	BP	norm3847
GO:0009142	0.000488175	2.70441	10.1268	21	58	nucleoside triphosphate biosynthetic process	over	BP	norm3847
GO:0009124	0.000495855	2.38513	13.6188	26	78	nucleoside monophosphate biosynthetic process	over	BP	norm3847
GO:0006732	0.000522336	2.97508	8.16153	18	47	coenzyme metabolic process	over	BP	norm3847
GO:0043933	0.000596425	1.99586	21.9216	37	126	protein-containing complex subunit organization	over	BP	norm3847
GO:1901575	0.000662066	1.56611	56.1441	79	322	organic substance catabolic process	over	BP	norm3847
GO:0072522	0.000754612	2.14576	16.8805	30	97	purine-containing compound biosynthetic process	over	BP	norm3847
GO:0072350	0.000758216	4.36325	4.00988	11	23	tricarboxylic acid metabolic process	over	BP	norm3847
GO:0006099	0.000768119	4.3554	4.0158	11	23	tricarboxylic acid cycle	over	BP	norm3847
GO:0006333	0.000768119	4.3554	4.0158	11	23	chromatin assembly or disassembly	over	BP	norm3847
GO:0005996	0.000795698	3.24324	6.4602	15	37	monosaccharide metabolic process	over	BP	norm3847
GO:0046903	0.000795698	3.24324	6.4602	15	37	secretion	over	BP	norm3847
GO:0030835	0.000828188	23.7045	1.0476	5	6	negative regulation of actin filament depolymerization	over	BP	norm3847
GO:0006542	0.000836999	8.30335	1.9206	7	11	glutamine biosynthetic process	over	BP	norm3847
GO:0019725	0.000869015	6.41611	2.41698	8	14	cellular homeostasis	over	BP	norm3847
GO:0046394	0.000983049	2.6719	9.22197	19	53	carboxylic acid biosynthetic process	over	BP	norm3847
GO:0046034	0.00103999	2.43748	11.349	22	65	ATP metabolic process	over	BP	norm3847
GO:0007155	0.00118829	1.94359	21.1266	35	121	cell adhesion	over	BP	norm3847
GO:0000413	0.00148576	3.56385	4.8888	12	28	protein peptidyl-prolyl isomerization	over	BP	norm3847
GO:0006520	0.00164424	1.62715	39.2464	57	225	cellular amino acid metabolic process	over	BP	norm3847
GO:0006733	0.00169411	2.59567	8.90459	18	51	oxidoreduction coenzyme metabolic process	over	BP	norm3847
GO:0019752	0.00172426	4.09749	3.73299	10	22	carboxylic acid metabolic process	over	BP	norm3847
GO:0006090	0.00211816	3.35781	5.05842	12	29	pyruvate metabolic process	over	BP	norm3847
GO:0007160	0.00215887	3.95709	3.8412	10	22	cell-matrix adhesion	over	BP	norm3847
GO:0043242	0.00247994	11.8507	1.2222	5	7	negative regulation of protein complex disassembly	over	BP	norm3847
GO:1901879	0.00247994	11.8507	1.2222	5	7	regulation of protein depolymerization	over	BP	norm3847
GO:0006112	0.00247994	11.8507	1.2222	5	7	energy reserve metabolic process	over	BP	norm3847
GO:0006108	0.00247994	11.8507	1.2222	5	7	malate metabolic process	over	BP	norm3847
GO:0044282	0.00269464	2.7429	7.15859	15	41	small molecule catabolic process	over	BP	norm3847
GO:0044248	0.00271588	1.50759	51.0876	70	293	cellular catabolic process	over	BP	norm3847
GO:0098660	0.00308732	1.96261	16.7616	28	96	inorganic ion transmembrane transport	over	BP	norm3847
GO:0022406	0.00314276	5.53417	2.2698	7	13	membrane docking	over	BP	norm3847
GO:0042558	0.00314276	5.53417	2.2698	7	13	pteridine-containing compound metabolic process	over	BP	norm3847
GO:0009116	0.00320448	2.94877	5.92443	13	34	nucleoside metabolic process	over	BP	norm3847
GO:0006165	0.00343341	2.77241	6.6348	14	38	nucleoside diphosphate phosphorylation	over	BP	norm3847
GO:1901607	0.00352663	2.64097	7.33319	15	42	alpha-amino acid biosynthetic process	over	BP	norm3847
GO:0006511	0.00374376	2.01828	14.6664	25	84	ubiquitin-dependent protein catabolic process	over	BP	norm3847
GO:0043632	0.00374376	2.01828	14.6664	25	84	modification-dependent macromolecule catabolic process	over	BP	norm3847
GO:0006397	0.00387671	2.17281	11.6982	21	67	mRNA processing	over	BP	norm3847
GO:0007269	0.00398716	18.9523	0.872999	4	5	neurotransmitter secretion	over	BP	norm3847
GO:0072524	0.00435154	2.31388	9.60299	18	55	pyridine-containing compound metabolic process	over	BP	norm3847
GO:0046496	0.00453674	2.45378	8.20619	16	47	nicotinamide nucleotide metabolic process	over	BP	norm3847
GO:0070588	0.00468046	3.39093	4.1904	10	24	calcium ion transmembrane transport	over	BP	norm3847
GO:0051641	0.00488677	Inf	0.509356	3	3	cellular localization	over	BP	norm3847
GO:0006546	0.00531485	Inf	0.5238	3	3	glycine catabolic process	over	BP	norm3847
GO:0034311	0.00531485	Inf	0.5238	3	3	diol metabolic process	over	BP	norm3847
GO:0071616	0.00531485	Inf	0.5238	3	3	acyl-CoA biosynthetic process	over	BP	norm3847
GO:0006102	0.00531485	Inf	0.5238	3	3	isocitrate metabolic process	over	BP	norm3847
GO:0006729	0.00531485	Inf	0.5238	3	3	tetrahydrobiopterin biosynthetic process	over	BP	norm3847
GO:0006898	0.00531485	Inf	0.5238	3	3	receptor-mediated endocytosis	over	BP	norm3847
GO:0006913	0.00534569	4.74298	2.4444	7	14	nucleocytoplasmic transport	over	BP	norm3847
GO:0046835	0.00566263	7.8995	1.3968	5	8	carbohydrate phosphorylation	over	BP	norm3847
GO:0098655	0.00573829	1.80967	19.0314	30	109	cation transmembrane transport	over	BP	norm3847
GO:0032787	0.00681028	3.82508	3.12266	8	18	monocarboxylic acid metabolic process	over	BP	norm3847
GO:0007219	0.00704581	3.79976	3.13971	8	18	Notch signaling pathway	over	BP	norm3847
GO:0009069	0.00708911	3.79522	3.1428	8	18	serine family amino acid metabolic process	over	BP	norm3847
GO:0071824	0.00711647	2.9014	5.0634	11	29	protein-DNA complex subunit organization	over	BP	norm3847
GO:1902600	0.00735136	2.37598	7.85699	15	45	proton transmembrane transport	over	BP	norm3847
GO:0044267	0.00754182	1.20343	235.702	268	1351	cellular protein metabolic process	over	BP	norm3847
GO:0010639	0.00852955	4.14958	2.619	7	15	negative regulation of organelle organization	over	BP	norm3847
GO:0006753	0.00985284	1.46325	42.4459	57	244	nucleoside phosphate metabolic process	over	BP	norm3847
GO:0008299	0.00995169	4.74074	2.0952	6	12	isoprenoid biosynthetic process	over	BP	norm3847
GO:0006606	0.0103051	9.47494	1.0476	4	6	protein import into nucleus	over	BP	norm3847
GO:0006471	0.0103051	9.47494	1.0476	4	6	protein ADP-ribosylation	over	BP	norm3847
GO:0046040	0.0103051	9.47494	1.0476	4	6	IMP metabolic process	over	BP	norm3847
GO:0006779	0.0103051	9.47494	1.0476	4	6	porphyrin-containing compound biosynthetic process	over	BP	norm3847
GO:0051650	0.0103051	9.47494	1.0476	4	6	establishment of vesicle localization	over	BP	norm3847
GO:0006836	0.0106669	2.17721	8.88801	16	51	neurotransmitter transport	over	BP	norm3847
GO:0006073	0.010919	5.92388	1.5714	5	9	cellular glucan metabolic process	over	BP	norm3847
GO:0006096	0.0122035	2.79148	4.7142	10	27	glycolytic process	over	BP	norm3847
GO:0009185	0.0122035	2.79148	4.7142	10	27	ribonucleoside diphosphate metabolic process	over	BP	norm3847
GO:0009135	0.0122035	2.79148	4.7142	10	27	purine nucleoside diphosphate metabolic process	over	BP	norm3847
GO:0046031	0.0122035	2.79148	4.7142	10	27	ADP metabolic process	over	BP	norm3847
GO:0001505	0.0127816	3.69643	2.7884	7	16	regulation of neurotransmitter levels	over	BP	norm3847
GO:0016310	0.0145879	1.31044	78.0528	96	448	phosphorylation	over	BP	norm3847
GO:0033013	0.0147284	3.16188	3.492	8	20	tetrapyrrole metabolic process	over	BP	norm3847
GO:0006413	0.0157011	2.84632	4.1904	9	24	translational initiation	over	BP	norm3847
GO:0006414	0.0157011	2.84632	4.1904	9	24	translational elongation	over	BP	norm3847
GO:0043624	0.0157011	2.84632	4.1904	9	24	cellular protein complex disassembly	over	BP	norm3847
GO:1901292	0.0179026	2.14448	7.85699	14	45	nucleoside phosphate catabolic process	over	BP	norm3847
GO:0005978	0.0184796	14.2057	0.6984	3	4	glycogen biosynthetic process	over	BP	norm3847
GO:0046185	0.0184796	14.2057	0.6984	3	4	aldehyde catabolic process	over	BP	norm3847
GO:0051016	0.0184796	14.2057	0.6984	3	4	barbed-end actin filament capping	over	BP	norm3847
GO:0031047	0.0184796	14.2057	0.6984	3	4	gene silencing by RNA	over	BP	norm3847
GO:0006072	0.0184796	14.2057	0.6984	3	4	glycerol-3-phosphate metabolic process	over	BP	norm3847
GO:0034249	0.0184796	14.2057	0.6984	3	4	negative regulation of cellular amide metabolic process	over	BP	norm3847
GO:0016050	0.0184796	14.2057	0.6984	3	4	vesicle organization	over	BP	norm3847
GO:0006378	0.0184796	14.2057	0.6984	3	4	mRNA polyadenylation	over	BP	norm3847
GO:0006189	0.0184796	14.2057	0.6984	3	4	'de novo' IMP biosynthetic process	over	BP	norm3847
GO:0016441	0.0184796	14.2057	0.6984	3	4	posttranscriptional gene silencing	over	BP	norm3847
GO:0007034	0.0187319	4.73851	1.746	5	10	vacuolar transport	over	BP	norm3847
GO:0019363	0.0188384	2.20417	7.15859	13	41	pyridine nucleotide biosynthetic process	over	BP	norm3847
GO:0043043	0.0190205	1.29828	76.1255	93	436	peptide biosynthetic process	over	BP	norm3847
GO:0046128	0.0202285	2.91829	3.6666	8	21	purine ribonucleoside metabolic process	over	BP	norm3847
GO:0046395	0.0203685	2.37268	5.7618	11	33	carboxylic acid catabolic process	over	BP	norm3847
GO:0006012	0.0207386	6.31583	1.2222	4	7	galactose metabolic process	over	BP	norm3847
GO:0046856	0.0207386	6.31583	1.2222	4	7	phosphatidylinositol dephosphorylation	over	BP	norm3847
GO:0031123	0.0207386	6.31583	1.2222	4	7	RNA 3'-end processing	over	BP	norm3847
GO:0006873	0.0207386	6.31583	1.2222	4	7	cellular ion homeostasis	over	BP	norm3847
GO:0006875	0.0207386	6.31583	1.2222	4	7	cellular metal ion homeostasis	over	BP	norm3847
GO:0030258	0.0207962	2.49701	5.0634	10	29	lipid modification	over	BP	norm3847
GO:0042451	0.0260928	3.01674	3.1428	7	18	purine nucleoside biosynthetic process	over	BP	norm3847
GO:0015986	0.0260928	3.01674	3.1428	7	18	ATP synthesis coupled proton transport	over	BP	norm3847
GO:0006518	0.0281246	4.00517	1.89825	5	11	peptide metabolic process	over	BP	norm3847
GO:0007010	0.0293445	1.75957	12.2588	19	71	cytoskeleton organization	over	BP	norm3847
GO:0006904	0.0294842	3.94826	1.9206	5	11	vesicle docking involved in exocytosis	over	BP	norm3847
GO:0048278	0.0303584	Inf	0.348559	2	2	vesicle docking	over	BP	norm3847
GO:0006564	0.0304701	Inf	0.3492	2	2	L-serine biosynthetic process	over	BP	norm3847
GO:0006559	0.0304701	Inf	0.3492	2	2	L-phenylalanine catabolic process	over	BP	norm3847
GO:0045747	0.0304701	Inf	0.3492	2	2	positive regulation of Notch signaling pathway	over	BP	norm3847
GO:0006537	0.0304701	Inf	0.3492	2	2	glutamate biosynthetic process	over	BP	norm3847
GO:0009448	0.0304701	Inf	0.3492	2	2	gamma-aminobutyric acid metabolic process	over	BP	norm3847
GO:0006086	0.0304701	Inf	0.3492	2	2	acetyl-CoA biosynthetic process from pyruvate	over	BP	norm3847
GO:0006000	0.0304701	Inf	0.3492	2	2	fructose metabolic process	over	BP	norm3847
GO:0030433	0.0304701	Inf	0.3492	2	2	ubiquitin-dependent ERAD pathway	over	BP	norm3847
GO:0035195	0.0304701	Inf	0.3492	2	2	gene silencing by miRNA	over	BP	norm3847
GO:0007007	0.0304701	Inf	0.3492	2	2	inner mitochondrial membrane organization	over	BP	norm3847
GO:0006428	0.0304701	Inf	0.3492	2	2	isoleucyl-tRNA aminoacylation	over	BP	norm3847
GO:0090382	0.0304701	Inf	0.3492	2	2	phagosome maturation	over	BP	norm3847
GO:1902221	0.0304701	Inf	0.3492	2	2	erythrose 4-phosphate/phosphoenolpyruvate family amino acid metabolic process	over	BP	norm3847
GO:0051694	0.0304701	Inf	0.3492	2	2	pointed-end actin filament capping	over	BP	norm3847
GO:0006892	0.0304701	Inf	0.3492	2	2	post-Golgi vesicle-mediated transport	over	BP	norm3847
GO:0033365	0.0314838	2.17441	6.111	11	35	protein localization to organelle	over	BP	norm3847
GO:1901564	0.0316261	1.14132	295.265	322	1770	organonitrogen compound metabolic process	over	BP	norm3847
GO:0030036	0.0323271	3.19451	2.59522	6	15	actin cytoskeleton organization	over	BP	norm3847
GO:0016226	0.0336796	3.1593	2.619	6	15	iron-sulfur cluster assembly	over	BP	norm3847
GO:1901617	0.0336796	3.1593	2.619	6	15	organic hydroxy compound biosynthetic process	over	BP	norm3847
GO:0006213	0.0336796	3.1593	2.619	6	15	pyrimidine nucleoside metabolic process	over	BP	norm3847
GO:0006749	0.0336796	3.1593	2.619	6	15	glutathione metabolic process	over	BP	norm3847
GO:0072330	0.0339761	1.87387	9.25379	15	53	monocarboxylic acid biosynthetic process	over	BP	norm3847
GO:0045333	0.0339761	1.87387	9.25379	15	53	cellular respiration	over	BP	norm3847
GO:0022411	0.034457	2.37104	4.7142	9	27	cellular component disassembly	over	BP	norm3847
GO:0044272	0.0352945	2.52855	4.0158	8	23	sulfur compound biosynthetic process	over	BP	norm3847
GO:0023061	0.0358146	4.73628	1.3968	4	8	signal release	over	BP	norm3847
GO:0032012	0.0358146	4.73628	1.3968	4	8	regulation of ARF protein signal transduction	over	BP	norm3847
GO:0043101	0.0358146	4.73628	1.3968	4	8	purine-containing compound salvage	over	BP	norm3847
GO:0006206	0.0358146	4.73628	1.3968	4	8	pyrimidine nucleobase metabolic process	over	BP	norm3847
GO:0006629	0.0374134	1.35777	40.158	51	230	lipid metabolic process	over	BP	norm3847
GO:0046173	0.0402183	7.10197	0.872999	3	5	polyol biosynthetic process	over	BP	norm3847
GO:0009303	0.0402183	7.10197	0.872999	3	5	rRNA transcription	over	BP	norm3847
GO:0033500	0.0402183	7.10197	0.872999	3	5	carbohydrate homeostasis	over	BP	norm3847
GO:0006303	0.0402183	7.10197	0.872999	3	5	double-strand break repair via nonhomologous end joining	over	BP	norm3847
GO:0032269	0.0402183	7.10197	0.872999	3	5	negative regulation of cellular protein metabolic process	over	BP	norm3847
GO:0006890	0.0402183	7.10197	0.872999	3	5	retrograde vesicle-mediated transport, Golgi to ER	over	BP	norm3847
GO:0001678	0.0402183	7.10197	0.872999	3	5	cellular glucose homeostasis	over	BP	norm3847
GO:0019673	0.0402183	7.10197	0.872999	3	5	GDP-mannose metabolic process	over	BP	norm3847
GO:0048522	0.0406865	1.70946	11.8728	18	68	positive regulation of cellular process	over	BP	norm3847
GO:0009165	0.0408635	1.4123	29.7523	39	171	nucleotide biosynthetic process	over	BP	norm3847
GO:0090662	0.0408669	2.15569	5.5872	10	32	ATP hydrolysis coupled transmembrane transport	over	BP	norm3847
GO:0015991	0.0408669	2.15569	5.5872	10	32	ATP hydrolysis coupled proton transport	over	BP	norm3847
GO:0070838	0.0429978	1.96304	7.15859	12	41	divalent metal ion transport	over	BP	norm3847
GO:0050790	0.0429978	1.96304	7.15859	12	41	regulation of catalytic activity	over	BP	norm3847
GO:0006081	0.0432067	3.38944	2.09233	5	12	cellular aldehyde metabolic process	over	BP	norm3847
GO:1901070	0.0434359	3.3838	2.0952	5	12	guanosine-containing compound biosynthetic process	over	BP	norm3847
GO:0007268	0.0434359	3.3838	2.0952	5	12	chemical synaptic transmission	over	BP	norm3847
GO:0099537	0.0434359	3.3838	2.0952	5	12	trans-synaptic signaling	over	BP	norm3847
GO:0005976	0.0434359	3.3838	2.0952	5	12	polysaccharide metabolic process	over	BP	norm3847
GO:0046112	0.0434359	3.3838	2.0952	5	12	nucleobase biosynthetic process	over	BP	norm3847
GO:0046039	0.0434359	3.3838	2.0952	5	12	GTP metabolic process	over	BP	norm3847
GO:0034404	0.0442313	2.38088	4.175	8	24	nucleobase-containing small molecule biosynthetic process	over	BP	norm3847
GO:0042455	0.0450912	2.37022	4.1904	8	24	ribonucleoside biosynthetic process	over	BP	norm3847
GO:0072657	0.0461402	2.84301	2.7936	6	16	protein localization to membrane	over	BP	norm3847
GO:0022618	0.0461402	2.84301	2.7936	6	16	ribonucleoprotein complex assembly	over	BP	norm3847
GO:0042398	0.0462958	2.55198	3.492	7	20	cellular modified amino acid biosynthetic process	over	BP	norm3847
GO:0005622	1.12e-27	2.23135	374.695	522	2060	intracellular	over	CC	norm3847
GO:0005623	2.66e-26	2.18785	415.984	560	2287	cell	over	CC	norm3847
GO:0005737	4.39e-10	2.47236	44.3358	84	270	cytoplasm	over	CC	norm3847
GO:0030117	7.92e-07	4.40757	8.91264	24	49	membrane coat	over	CC	norm3847
GO:0044446	1.42e-06	1.61869	118.076	163	655	intracellular organelle part	over	CC	norm3847
GO:0097708	2.72e-06	5.11264	6.54807	19	36	intracellular vesicle	over	CC	norm3847
GO:0005885	6.46e-06	Inf	1.27323	7	7	Arp2/3 protein complex	over	CC	norm3847
GO:0043228	1.62e-05	1.54	117.32	157	645	non-membrane-bounded organelle	over	CC	norm3847
GO:0005783	2.57e-05	2.74055	15.0969	31	83	endoplasmic reticulum	over	CC	norm3847
GO:0005643	2.73e-05	13.6179	2.18269	9	12	nuclear pore	over	CC	norm3847
GO:0031975	4.17e-05	2.70175	14.7331	30	81	envelope	over	CC	norm3847
GO:0099081	8.63e-05	3.38399	8.54886	20	47	supramolecular polymer	over	CC	norm3847
GO:1905369	0.000138774	3.69125	6.91185	17	38	endopeptidase complex	over	CC	norm3847
GO:0005852	0.00021283	6.48559	3.09214	10	17	eukaryotic translation initiation factor 3 complex	over	CC	norm3847
GO:0005874	0.000602325	3.41304	6.36617	15	35	microtubule	over	CC	norm3847
GO:0016459	0.000861644	3.24972	6.54807	15	36	myosin complex	over	CC	norm3847
GO:0030662	0.00108303	4.16112	4.18349	11	23	coated vesicle membrane	over	CC	norm3847
GO:0012506	0.001675	3.84009	4.36538	11	24	vesicle membrane	over	CC	norm3847
GO:0030131	0.001814	9.04857	1.63702	6	9	clathrin adaptor complex	over	CC	norm3847
GO:0016272	0.001814	9.04857	1.63702	6	9	prefoldin complex	over	CC	norm3847
GO:0031090	0.00247083	2.01711	16.6116	28	92	organelle membrane	over	CC	norm3847
GO:0044444	0.00255178	1.45192	67.8068	89	401	cytoplasmic part	over	CC	norm3847
GO:0005740	0.002655	2.48261	9.27643	18	51	mitochondrial envelope	over	CC	norm3847
GO:0000786	0.00279008	2.89127	6.54807	14	36	nucleosome	over	CC	norm3847
GO:0030660	0.00293441	3.77864	4.0016	10	22	Golgi-associated vesicle membrane	over	CC	norm3847
GO:0015629	0.00355897	5.40463	2.32031	7	13	actin cytoskeleton	over	CC	norm3847
GO:1990204	0.00383975	6.78477	1.81891	6	10	oxidoreductase complex	over	CC	norm3847
GO:0030133	0.00458666	18.1508	0.906	4	5	transport vesicle	over	CC	norm3847
GO:0000159	0.00600152	Inf	0.545672	3	3	protein phosphatase type 2A complex	over	CC	norm3847
GO:0099503	0.00600152	Inf	0.545672	3	3	secretory vesicle	over	CC	norm3847
GO:0008021	0.00600152	Inf	0.545672	3	3	synaptic vesicle	over	CC	norm3847
GO:0033180	0.00678221	7.53216	1.45513	5	8	proton-transporting V-type ATPase, V1 domain	over	CC	norm3847
GO:0005739	0.00701239	1.88136	16.1883	26	89	mitochondrion	over	CC	norm3847
GO:0005773	0.00715771	5.42649	2.0008	6	11	vacuole	over	CC	norm3847
GO:0005829	0.00758662	3.39701	3.8197	9	21	cytosol	over	CC	norm3847
GO:0005856	0.0094778	1.57217	30.5369	43	172	cytoskeleton	over	CC	norm3847
GO:0005839	0.010425	3.97789	2.71746	7	15	proteasome core complex	over	CC	norm3847
GO:0005615	0.0104818	2.45708	6.72996	13	37	extracellular space	over	CC	norm3847
GO:0016469	0.0105806	2.26979	8.18508	15	45	proton-transporting two-sector ATPase complex	over	CC	norm3847
GO:0098796	0.0119069	1.69961	20.0506	30	113	membrane protein complex	over	CC	norm3847
GO:0043229	0.0122491	1.26507	130.968	153	774	intracellular organelle	over	CC	norm3847
GO:0019773	0.0191318	3.87417	2.36458	6	13	proteasome core complex, alpha-subunit complex	over	CC	norm3847
GO:0005635	0.0203007	13.66	0.722111	3	4	nuclear envelope	over	CC	norm3847
GO:0005853	0.02074	13.5347	0.727563	3	4	eukaryotic translation elongation factor 1 complex	over	CC	norm3847
GO:0005849	0.02074	13.5347	0.727563	3	4	mRNA cleavage factor complex	over	CC	norm3847
GO:0032991	0.0227399	1.24124	118.945	138	722	protein-containing complex	over	CC	norm3847
GO:0005774	0.0239015	6.01909	1.27323	4	7	vacuolar membrane	over	CC	norm3847
GO:0005938	0.0239015	6.01909	1.27323	4	7	cell cortex	over	CC	norm3847
GO:0005869	0.0239015	6.01909	1.27323	4	7	dynactin complex	over	CC	norm3847
GO:0005743	0.0268304	2.26415	6.00239	11	33	mitochondrial inner membrane	over	CC	norm3847
GO:0030658	0.0284364	3.38907	2.54647	6	14	transport vesicle membrane	over	CC	norm3847
GO:0019898	0.0284364	3.38907	2.54647	6	14	extrinsic component of membrane	over	CC	norm3847
GO:0012505	0.0296771	1.92135	9.12337	15	52	endomembrane system	over	CC	norm3847
GO:0043564	0.0330545	Inf	0.363781	2	2	Ku70:Ku80 complex	over	CC	norm3847
GO:0031252	0.0330545	Inf	0.363781	2	2	cell leading edge	over	CC	norm3847
GO:0045335	0.0330545	Inf	0.363781	2	2	phagocytic vesicle	over	CC	norm3847
GO:0016581	0.0330545	Inf	0.363781	2	2	NuRD complex	over	CC	norm3847
GO:0036452	0.0330545	Inf	0.363781	2	2	ESCRT complex	over	CC	norm3847
GO:0005741	0.0346348	3.76332	2.0008	5	11	mitochondrial outer membrane	over	CC	norm3847
GO:0099513	0.0397259	4.56663	1.44125	4	8	polymeric cytoskeletal fiber	over	CC	norm3847
GO:0005581	0.0410208	4.51322	1.45513	4	8	collagen trimer	over	CC	norm3847
GO:0030126	0.0410208	4.51322	1.45513	4	8	COPI vesicle coat	over	CC	norm3847
GO:0030137	0.0410208	4.51322	1.45513	4	8	COPI-coated vesicle	over	CC	norm3847
GO:1904949	0.0436989	2.41121	4.18349	8	23	ATPase complex	over	CC	norm3847
GO:0044433	0.0440749	6.82091	0.903446	3	5	cytoplasmic vesicle part	over	CC	norm3847
GO:1903293	0.0448689	6.76568	0.909454	3	5	phosphatase complex	over	CC	norm3847
GO:0000145	0.0448689	6.76568	0.909454	3	5	exocyst	over	CC	norm3847
GO:0030125	0.0448689	6.76568	0.909454	3	5	clathrin vesicle coat	over	CC	norm3847

## Sheet: UNDER
GOBPID	Pvalue	OddsRatio	ExpCount	Count	Size	Term	test	ontology	subset
GO:0090304	6.84e-64	0.266394	388.31	145	2224	nucleic acid metabolic process	under	BP	norm3847
GO:0006259	3.41e-53	0.138893	190.314	35	1090	DNA metabolic process	under	BP	norm3847
GO:0006139	2.04e-43	0.387692	450.817	235	2582	nucleobase-containing compound metabolic process	under	BP	norm3847
GO:0046483	2.14e-39	0.414208	462.864	255	2651	heterocycle metabolic process	under	BP	norm3847
GO:0006725	3.81e-38	0.421223	462.515	258	2649	cellular aromatic compound metabolic process	under	BP	norm3847
GO:1901360	1.98e-37	0.427199	467.404	264	2677	organic cyclic compound metabolic process	under	BP	norm3847
GO:0044260	1.09e-35	0.466792	565.005	353	3236	cellular macromolecule metabolic process	under	BP	norm3847
GO:0043170	8.83e-31	0.523435	715.685	507	4099	macromolecule metabolic process	under	BP	norm3847
GO:0034641	1.48e-29	0.495028	523.974	336	3001	cellular nitrogen compound metabolic process	under	BP	norm3847
GO:0009059	3.89e-24	0.442399	296.121	161	1696	macromolecule biosynthetic process	under	BP	norm3847
GO:0034645	5.47e-24	0.443473	295.598	161	1693	cellular macromolecule biosynthetic process	under	BP	norm3847
GO:0032774	7.04e-23	0.2903	141.251	50	809	RNA biosynthetic process	under	BP	norm3847
GO:1903506	8.26e-23	0.250954	120.649	37	691	regulation of nucleic acid-templated transcription	under	BP	norm3847
GO:0006355	8.26e-23	0.250954	120.649	37	691	regulation of transcription, DNA-templated	under	BP	norm3847
GO:2001141	8.26e-23	0.250954	120.649	37	691	regulation of RNA biosynthetic process	under	BP	norm3847
GO:0019219	1.21e-22	0.262159	125.014	40	716	regulation of nucleobase-containing compound metabolic process	under	BP	norm3847
GO:0006351	1.64e-22	0.292857	140.204	50	803	transcription, DNA-templated	under	BP	norm3847
GO:0097659	1.64e-22	0.292857	140.204	50	803	nucleic acid-templated transcription	under	BP	norm3847
GO:0051252	2.41e-22	0.257465	120.998	38	693	regulation of RNA metabolic process	under	BP	norm3847
GO:0009889	1.43e-21	0.279175	126.76	43	726	regulation of biosynthetic process	under	BP	norm3847
GO:0031326	1.65e-21	0.279622	126.585	43	725	regulation of cellular biosynthetic process	under	BP	norm3847
GO:0010556	1.9e-21	0.280072	126.41	43	724	regulation of macromolecule biosynthetic process	under	BP	norm3847
GO:2000112	1.9e-21	0.280072	126.41	43	724	regulation of cellular macromolecule biosynthetic process	under	BP	norm3847
GO:0051171	7.01e-21	0.29637	130.95	47	750	regulation of nitrogen compound metabolic process	under	BP	norm3847
GO:0006260	9.48e-21	0.10317	62.856	8	360	DNA replication	under	BP	norm3847
GO:0060255	1.61e-20	0.307686	134.442	50	770	regulation of macromolecule metabolic process	under	BP	norm3847
GO:0080090	2.23e-20	0.306015	132.521	49	759	regulation of primary metabolic process	under	BP	norm3847
GO:0031323	3.36e-20	0.307441	131.998	49	756	regulation of cellular metabolic process	under	BP	norm3847
GO:0010468	5.1e-20	0.300162	126.934	46	727	regulation of gene expression	under	BP	norm3847
GO:0019222	8.86e-20	0.321826	136.712	53	783	regulation of metabolic process	under	BP	norm3847
GO:0015074	2.39e-18	0.0376033	42.9516	2	246	DNA integration	under	BP	norm3847
GO:0016070	2.5e-16	0.460315	204.107	111	1169	RNA metabolic process	under	BP	norm3847
GO:0006807	5.83e-16	0.646407	808.921	660	4633	nitrogen compound metabolic process	under	BP	norm3847
GO:0007186	8.3e-14	0.209797	59.7132	15	342	G-protein coupled receptor signaling pathway	under	BP	norm3847
GO:0006310	2.17e-13	0.0883055	37.1898	4	213	DNA recombination	under	BP	norm3847
GO:0032259	6.74e-12	0.114963	35.9676	5	206	methylation	under	BP	norm3847
GO:0044238	8.23e-12	0.694716	860.777	735	4930	primary metabolic process	under	BP	norm3847
GO:0006304	1e-11	0	22.8726	0	131	DNA modification	under	BP	norm3847
GO:0034654	1.36e-11	0.523846	187.52	113	1074	nucleobase-containing compound biosynthetic process	under	BP	norm3847
GO:0006305	2.65e-11	0	21.9996	0	126	DNA alkylation	under	BP	norm3847
GO:0006306	2.65e-11	0	21.9996	0	126	DNA methylation	under	BP	norm3847
GO:0044728	2.65e-11	0	21.9996	0	126	DNA methylation or demethylation	under	BP	norm3847
GO:0050794	6.96e-11	0.636152	355.311	260	2035	regulation of cellular process	under	BP	norm3847
GO:0050789	2.29e-10	0.647809	363.517	270	2082	regulation of biological process	under	BP	norm3847
GO:0044249	1.23e-09	0.662261	368.057	278	2108	cellular biosynthetic process	under	BP	norm3847
GO:1901576	3.18e-09	0.67181	374.342	286	2144	organic substance biosynthetic process	under	BP	norm3847
GO:0071704	4.72e-09	0.733375	900.237	793	5156	organic substance metabolic process	under	BP	norm3847
GO:0019438	5.61e-09	0.58676	194.679	129	1115	aromatic compound biosynthetic process	under	BP	norm3847
GO:0043414	6.84e-09	0.145187	28.809	5	165	macromolecule methylation	under	BP	norm3847
GO:0044237	8.57e-09	0.734446	761.605	657	4362	cellular metabolic process	under	BP	norm3847
GO:0018130	1.24e-08	0.597507	197.647	133	1132	heterocycle biosynthetic process	under	BP	norm3847
GO:0010467	1.76e-08	0.642325	261.551	189	1498	gene expression	under	BP	norm3847
GO:1901362	2e-08	0.604545	200.091	136	1146	organic cyclic compound biosynthetic process	under	BP	norm3847
GO:0009058	2.11e-08	0.691174	386.564	302	2214	biosynthetic process	under	BP	norm3847
GO:0051716	8.19e-08	0.651674	249.678	182	1430	cellular response to stimulus	under	BP	norm3847
GO:0065007	1.34e-07	0.705485	377.834	299	2164	biological regulation	under	BP	norm3847
GO:0050896	8.54e-07	0.693164	283.55	218	1624	response to stimulus	under	BP	norm3847
GO:0006974	1.61e-06	0.368677	45.0468	19	258	cellular response to DNA damage stimulus	under	BP	norm3847
GO:0006281	6e-06	0.387016	43.1262	19	247	DNA repair	under	BP	norm3847
GO:0033554	6.87e-06	0.41166	47.142	22	270	cellular response to stress	under	BP	norm3847
GO:0009987	1.2e-05	0.790362	1081.3	1005	6193	cellular process	under	BP	norm3847
GO:0019058	1.72e-05	0	9.95219	0	57	viral life cycle	under	BP	norm3847
GO:0044403	4.55e-05	0.0721767	11.5236	1	66	symbiont process	under	BP	norm3847
GO:0007165	6.29e-05	0.712491	203.933	158	1168	signal transduction	under	BP	norm3847
GO:0044419	6.41e-05	0.126727	13.2696	2	76	interspecies interaction between organisms	under	BP	norm3847
GO:0016032	6.5e-05	0.0744869	11.1744	1	64	viral process	under	BP	norm3847
GO:0000270	6.63e-05	0	8.72999	0	50	peptidoglycan metabolic process	under	BP	norm3847
GO:0051704	6.65e-05	0.201427	16.9362	4	97	multi-organism process	under	BP	norm3847
GO:0034470	7.75e-05	0.203642	16.7616	4	96	ncRNA processing	under	BP	norm3847
GO:0051726	8.04e-05	0	8.55539	0	49	regulation of cell cycle	under	BP	norm3847
GO:0007154	0.000107145	0.725244	211.091	166	1209	cell communication	under	BP	norm3847
GO:0071554	0.000143434	0	8.03159	0	46	cell wall organization or biogenesis	under	BP	norm3847
GO:0044271	0.000147289	0.756283	271.154	222	1553	cellular nitrogen compound biosynthetic process	under	BP	norm3847
GO:0023052	0.000194816	0.73331	206.901	164	1185	signaling	under	BP	norm3847
GO:0044036	0.000210949	0	7.68239	0	44	cell wall macromolecule metabolic process	under	BP	norm3847
GO:0018142	0.000210949	0	7.68239	0	44	protein-DNA covalent cross-linking	under	BP	norm3847
GO:0018143	0.000210949	0	7.68239	0	44	nucleic acid-protein covalent cross-linking	under	BP	norm3847
GO:0006022	0.000217615	0.297908	20.4282	7	117	aminoglycan metabolic process	under	BP	norm3847
GO:0006027	0.000310215	0	7.33319	0	42	glycosaminoglycan catabolic process	under	BP	norm3847
GO:0009253	0.000310215	0	7.33319	0	42	peptidoglycan catabolic process	under	BP	norm3847
GO:0006026	0.000400121	0.149063	11.349	2	65	aminoglycan catabolic process	under	BP	norm3847
GO:0009719	0.000422612	0.195538	13.095	3	75	response to endogenous stimulus	under	BP	norm3847
GO:0071495	0.000493541	0.198317	12.9204	3	74	cellular response to endogenous stimulus	under	BP	norm3847
GO:0042221	0.000525103	0.400925	26.5392	12	152	response to chemical	under	BP	norm3847
GO:0006352	0.000555325	0.153989	10.9998	2	63	DNA-templated transcription, initiation	under	BP	norm3847
GO:0016998	0.000670688	0	6.6348	0	38	cell wall macromolecule catabolic process	under	BP	norm3847
GO:0071310	0.00085218	0.247017	13.968	4	80	cellular response to organic substance	under	BP	norm3847
GO:0008033	0.000904853	0.162016	10.476	2	60	tRNA processing	under	BP	norm3847
GO:0048545	0.00106373	0.164879	10.3014	2	59	response to steroid hormone	under	BP	norm3847
GO:0071396	0.00106373	0.164879	10.3014	2	59	cellular response to lipid	under	BP	norm3847
GO:0071383	0.00106373	0.164879	10.3014	2	59	cellular response to steroid hormone stimulus	under	BP	norm3847
GO:0043401	0.00106373	0.164879	10.3014	2	59	steroid hormone mediated signaling pathway	under	BP	norm3847
GO:0009755	0.00106373	0.164879	10.3014	2	59	hormone-mediated signaling pathway	under	BP	norm3847
GO:0033993	0.00106373	0.164879	10.3014	2	59	response to lipid	under	BP	norm3847
GO:0030203	0.00124986	0.167844	10.1268	2	58	glycosaminoglycan metabolic process	under	BP	norm3847
GO:0055085	0.00127574	0.706106	117.331	89	672	transmembrane transport	under	BP	norm3847
GO:0014070	0.00202058	0.268394	12.9204	4	74	response to organic cyclic compound	under	BP	norm3847
GO:0070887	0.00228242	0.304904	14.3172	5	82	cellular response to chemical stimulus	under	BP	norm3847
GO:0019068	0.00313165	0	5.238	0	30	virion assembly	under	BP	norm3847
GO:0009725	0.00352509	0.243168	10.6506	3	61	response to hormone	under	BP	norm3847
GO:0009262	0.00365523	0.117659	7.15859	1	41	deoxyribonucleotide metabolic process	under	BP	norm3847
GO:0010033	0.00378095	0.395215	17.9838	8	103	response to organic substance	under	BP	norm3847
GO:0043412	0.00393788	0.783982	183.854	153	1053	macromolecule modification	under	BP	norm3847
GO:0032870	0.00408236	0.247466	10.476	3	60	cellular response to hormone stimulus	under	BP	norm3847
GO:0071407	0.00408236	0.247466	10.476	3	60	cellular response to organic cyclic compound	under	BP	norm3847
GO:0006313	0.00460246	0	4.8888	0	28	transposition, DNA-mediated	under	BP	norm3847
GO:0032196	0.00460246	0	4.8888	0	28	transposition	under	BP	norm3847
GO:0009451	0.00536648	0.298481	11.6982	4	67	RNA modification	under	BP	norm3847
GO:0007049	0.00552528	0.460766	21.4758	11	123	cell cycle	under	BP	norm3847
GO:1901136	0.00599211	0.366103	14.4918	6	83	carbohydrate derivative catabolic process	under	BP	norm3847
GO:0006261	0.00631246	0.261313	9.95219	3	57	DNA-dependent DNA replication	under	BP	norm3847
GO:0010564	0.00819867	0	4.365	0	25	regulation of cell cycle process	under	BP	norm3847
GO:0019079	0.00819867	0	4.365	0	25	viral genome replication	under	BP	norm3847
GO:0009263	0.00819867	0	4.365	0	25	deoxyribonucleotide biosynthetic process	under	BP	norm3847
GO:0009265	0.00819867	0	4.365	0	25	2'-deoxyribonucleotide biosynthetic process	under	BP	norm3847
GO:0009221	0.00819867	0	4.365	0	25	pyrimidine deoxyribonucleotide biosynthetic process	under	BP	norm3847
GO:0046385	0.00819867	0	4.365	0	25	deoxyribose phosphate biosynthetic process	under	BP	norm3847
GO:0000278	0.00826095	0.213945	8.03159	2	46	mitotic cell cycle	under	BP	norm3847
GO:0032775	0.00993823	0	4.1904	0	24	DNA methylation on adenine	under	BP	norm3847
GO:0007346	0.00993823	0	4.1904	0	24	regulation of mitotic cell cycle	under	BP	norm3847
GO:0009394	0.010085	0.138528	6.111	1	35	2'-deoxyribonucleotide metabolic process	under	BP	norm3847
GO:0019692	0.010085	0.138528	6.111	1	35	deoxyribose phosphate metabolic process	under	BP	norm3847
GO:0009219	0.0119182	0.142744	5.9364	1	34	pyrimidine deoxyribonucleotide metabolic process	under	BP	norm3847
GO:0007167	0.0140749	0.147223	5.7618	1	33	enzyme linked receptor protein signaling pathway	under	BP	norm3847
GO:0007166	0.014083	0.569685	27.4122	17	157	cell surface receptor signaling pathway	under	BP	norm3847
GO:0045786	0.0146019	0	3.8412	0	22	negative regulation of cell cycle	under	BP	norm3847
GO:0000160	0.0146019	0	3.8412	0	22	phosphorelay signal transduction system	under	BP	norm3847
GO:0006950	0.0160686	0.719884	66.6972	51	382	response to stress	under	BP	norm3847
GO:0007178	0.0176989	0	3.6666	0	21	transmembrane receptor protein serine/threonine kinase signaling pathway	under	BP	norm3847
GO:0030908	0.0176989	0	3.6666	0	21	protein splicing	under	BP	norm3847
GO:0009157	0.0176989	0	3.6666	0	21	deoxyribonucleoside monophosphate biosynthetic process	under	BP	norm3847
GO:0009176	0.0176989	0	3.6666	0	21	pyrimidine deoxyribonucleoside monophosphate metabolic process	under	BP	norm3847
GO:0009177	0.0176989	0	3.6666	0	21	pyrimidine deoxyribonucleoside monophosphate biosynthetic process	under	BP	norm3847
GO:0046073	0.0176989	0	3.6666	0	21	dTMP metabolic process	under	BP	norm3847
GO:0006231	0.0176989	0	3.6666	0	21	dTMP biosynthetic process	under	BP	norm3847
GO:0006814	0.0191973	0.444872	14.1426	7	81	sodium ion transport	under	BP	norm3847
GO:1903047	0.0204016	0.247914	6.984	2	40	mitotic cell cycle process	under	BP	norm3847
GO:0016539	0.0214523	0	3.492	0	20	intein-mediated protein splicing	under	BP	norm3847
GO:0039694	0.0214523	0	3.492	0	20	viral RNA genome replication	under	BP	norm3847
GO:0022402	0.0239139	0.457345	13.7934	7	79	cell cycle process	under	BP	norm3847
GO:0034660	0.0284146	0.654702	34.2216	24	196	ncRNA metabolic process	under	BP	norm3847
GO:0006278	0.0315137	0	3.1428	0	18	RNA-dependent DNA biosynthetic process	under	BP	norm3847
GO:0008152	0.0332354	0.901363	1084.27	1051	6210	metabolic process	under	BP	norm3847
GO:0009605	0.03333	0.336485	7.85699	3	45	response to external stimulus	under	BP	norm3847
GO:0070647	0.0360717	0.556247	18.1584	11	104	protein modification by small protein conjugation or removal	under	BP	norm3847
GO:0030001	0.0363063	0.69667	40.5072	30	232	metal ion transport	under	BP	norm3847
GO:0051259	0.0365511	0.277221	6.2856	2	36	protein complex oligomerization	under	BP	norm3847
GO:0032446	0.0366283	0.42806	10.476	5	60	protein modification by small protein conjugation	under	BP	norm3847
GO:0048513	0.0381942	0	2.9682	0	17	animal organ development	under	BP	norm3847
GO:0001510	0.0381942	0	2.9682	0	17	RNA methylation	under	BP	norm3847
GO:0006030	0.0410892	0.436042	10.3014	5	59	chitin metabolic process	under	BP	norm3847
GO:0006399	0.0454448	0.651683	27.2376	19	156	tRNA metabolic process	under	BP	norm3847
GO:1901990	0.0462898	0	2.7936	0	16	regulation of mitotic cell cycle phase transition	under	BP	norm3847
GO:1901987	0.0462898	0	2.7936	0	16	regulation of cell cycle phase transition	under	BP	norm3847
GO:0044770	0.0462898	0	2.7936	0	16	cell cycle phase transition	under	BP	norm3847
GO:0044772	0.0462898	0	2.7936	0	16	mitotic cell cycle phase transition	under	BP	norm3847
GO:0198738	0.0493101	0.362506	7.33319	3	42	cell-cell signaling by wnt	under	BP	norm3847
GO:1905114	0.0493101	0.362506	7.33319	3	42	cell surface receptor signaling pathway involved in cell-cell signaling	under	BP	norm3847
GO:0016055	0.0493101	0.362506	7.33319	3	42	Wnt signaling pathway	under	BP	norm3847
GO:0003677	5.55e-43	0.265462	249.732	82	1497	DNA binding	under	MF	norm3847
GO:0003676	4.79e-33	0.468651	469.77	268	2816	nucleic acid binding	under	MF	norm3847
GO:0004930	1.22e-19	0.0880835	56.3857	6	338	G-protein coupled receptor activity	under	MF	norm3847
GO:0060089	7.49e-18	0.234354	86.7472	24	520	molecular transducer activity	under	MF	norm3847
GO:0038023	8.63e-18	0.234847	86.5804	24	519	signaling receptor activity	under	MF	norm3847
GO:0140097	1.42e-15	0.236972	75.4033	21	452	catalytic activity, acting on DNA	under	MF	norm3847
GO:0004888	6.68e-15	0.249555	75.2365	22	451	transmembrane signaling receptor activity	under	MF	norm3847
GO:0004871	6.5e-13	0.35769	97.257	40	583	signal transducer activity	under	MF	norm3847
GO:0043565	1.01e-12	0.214817	55.5516	14	333	sequence-specific DNA binding	under	MF	norm3847
GO:0003700	3.87e-12	0.230253	55.7184	15	334	DNA binding transcription factor activity	under	MF	norm3847
GO:0004518	6.34e-12	0.183809	46.2096	10	277	nuclease activity	under	MF	norm3847
GO:0140110	1.98e-11	0.278028	62.0576	20	372	transcription regulator activity	under	MF	norm3847
GO:0008168	3.07e-10	0.316417	63.2254	23	379	methyltransferase activity	under	MF	norm3847
GO:0008270	5.04e-10	0.532104	159.815	95	958	zinc ion binding	under	MF	norm3847
GO:0004386	4.9e-09	0.246122	42.039	12	252	helicase activity	under	MF	norm3847
GO:0016741	2.8e-08	0.389776	65.7277	29	394	transferase activity, transferring one-carbon groups	under	MF	norm3847
GO:0004519	5.29e-08	0.196404	30.5283	7	183	endonuclease activity	under	MF	norm3847
GO:0016779	8.57e-07	0.362991	46.2096	19	277	nucleotidyltransferase activity	under	MF	norm3847
GO:0016893	1.89e-06	0.057032	14.6803	1	88	endonuclease activity, active with either ribo- or deoxyribonucleic acids and producing 5'-phosphomonoesters	under	MF	norm3847
GO:0008170	2.13e-06	0.163774	20.8527	4	125	N-methyltransferase activity	under	MF	norm3847
GO:0003697	8.23e-06	0	10.6766	0	64	single-stranded DNA binding	under	MF	norm3847
GO:0034061	2.76e-05	0.190805	18.0167	4	108	DNA polymerase activity	under	MF	norm3847
GO:0046872	2.78e-05	0.791225	477.777	406	2864	metal ion binding	under	MF	norm3847
GO:0043169	4.3e-05	0.797038	483.282	413	2897	cation binding	under	MF	norm3847
GO:0016788	4.46e-05	0.628502	113.105	77	678	hydrolase activity, acting on ester bonds	under	MF	norm3847
GO:0003678	4.88e-05	0.291535	24.0223	8	144	DNA helicase activity	under	MF	norm3847
GO:0140098	0.000166872	0.524363	53.8834	31	323	catalytic activity, acting on RNA	under	MF	norm3847
GO:0046914	0.000245796	0.736433	196.182	154	1176	transition metal ion binding	under	MF	norm3847
GO:0097159	0.000254772	0.844624	766.211	693	4593	organic cyclic compound binding	under	MF	norm3847
GO:0061783	0.000267599	0	7.50697	0	45	peptidoglycan muralytic activity	under	MF	norm3847
GO:1901363	0.000277989	0.845568	765.711	693	4590	heterocyclic compound binding	under	MF	norm3847
GO:0008408	0.000313237	0.0872584	9.67565	1	58	3'-5' exonuclease activity	under	MF	norm3847
GO:0042624	0.000321367	0	7.34015	0	44	ATPase activity, uncoupled	under	MF	norm3847
GO:0004527	0.000361761	0.14841	11.5107	2	69	exonuclease activity	under	MF	norm3847
GO:0003887	0.000373352	0.231075	15.0139	4	90	DNA-directed DNA polymerase activity	under	MF	norm3847
GO:0003724	0.000668359	0	6.67286	0	40	RNA helicase activity	under	MF	norm3847
GO:0016888	0.00085048	0.0975709	8.67472	1	52	endodeoxyribonuclease activity, producing 5'-phosphomonoesters	under	MF	norm3847
GO:0004536	0.000860299	0.210089	12.3448	3	74	deoxyribonuclease activity	under	MF	norm3847
GO:0001653	0.00100346	0.0995303	8.5079	1	51	peptide receptor activity	under	MF	norm3847
GO:0008528	0.00100346	0.0995303	8.5079	1	51	G-protein coupled peptide receptor activity	under	MF	norm3847
GO:0016891	0.00138971	0	6.00558	0	36	endoribonuclease activity, producing 5'-phosphomonoesters	under	MF	norm3847
GO:0004520	0.00168967	0.174586	9.84247	2	59	endodeoxyribonuclease activity	under	MF	norm3847
GO:0097747	0.00204989	0.303152	14.5135	5	87	RNA polymerase activity	under	MF	norm3847
GO:0034062	0.00204989	0.303152	14.5135	5	87	5'-3' RNA polymerase activity	under	MF	norm3847
GO:0009008	0.00240604	0	5.50511	0	33	DNA-methyltransferase activity	under	MF	norm3847
GO:0016987	0.00240604	0	5.50511	0	33	bacterial sigma factor activity	under	MF	norm3847
GO:0000990	0.00240604	0	5.50511	0	33	transcription factor activity, core RNA polymerase binding	under	MF	norm3847
GO:0000996	0.00240604	0	5.50511	0	33	promoter selection factor activity	under	MF	norm3847
GO:0008378	0.00288901	0	5.33829	0	32	galactosyltransferase activity	under	MF	norm3847
GO:0016758	0.00305679	0.47932	26.5246	14	159	transferase activity, transferring hexosyl groups	under	MF	norm3847
GO:0008173	0.00346889	0	5.17147	0	31	RNA methyltransferase activity	under	MF	norm3847
GO:0016740	0.00574107	0.840303	317.461	279	1903	transferase activity	under	MF	norm3847
GO:0003968	0.00600454	0	4.671	0	28	RNA-directed 5'-3' RNA polymerase activity	under	MF	norm3847
GO:0003796	0.00600454	0	4.671	0	28	lysozyme activity	under	MF	norm3847
GO:0008080	0.00621966	0.261984	10.0093	3	60	N-acetyltransferase activity	under	MF	norm3847
GO:0016757	0.00650141	0.634016	48.5451	33	291	transferase activity, transferring glycosyl groups	under	MF	norm3847
GO:0004803	0.00720938	0	4.50418	0	27	transposase activity	under	MF	norm3847
GO:0005272	0.00730815	0.311055	11.3439	4	68	sodium channel activity	under	MF	norm3847
GO:0000988	0.0116365	0.365976	12.178	5	73	transcription factor activity, protein binding	under	MF	norm3847
GO:0004523	0.0124772	0	4.00372	0	24	RNA-DNA hybrid ribonuclease activity	under	MF	norm3847
GO:0009007	0.0124772	0	4.00372	0	24	site-specific DNA-methyltransferase (adenine-specific) activity	under	MF	norm3847
GO:0003707	0.015428	0.237223	7.34015	2	44	steroid hormone receptor activity	under	MF	norm3847
GO:0099528	0.0179846	0	3.67007	0	22	G-protein coupled neurotransmitter receptor activity	under	MF	norm3847
GO:0042083	0.0215916	0	3.50325	0	21	5,10-methylenetetrahydrofolate-dependent methyltransferase activity	under	MF	norm3847
GO:0004673	0.0259217	0	3.33643	0	20	protein histidine kinase activity	under	MF	norm3847
GO:0000155	0.0259217	0	3.33643	0	20	phosphorelay sensor kinase activity	under	MF	norm3847
GO:0016775	0.0259217	0	3.33643	0	20	phosphotransferase activity, nitrogenous group as acceptor	under	MF	norm3847
GO:0008146	0.028491	0.375945	9.50883	4	57	sulfotransferase activity	under	MF	norm3847
GO:0016407	0.0327463	0.422107	10.6766	5	64	acetyltransferase activity	under	MF	norm3847
GO:0016410	0.0365615	0.429419	10.5098	5	63	N-acyltransferase activity	under	MF	norm3847
GO:0003964	0.0373595	0	3.00279	0	18	RNA-directed DNA polymerase activity	under	MF	norm3847
GO:0008417	0.03974	0.184654	4.671	1	28	fucosyltransferase activity	under	MF	norm3847
GO:0046983	0.0443231	0.65181	27.3587	19	164	protein dimerization activity	under	MF	norm3847
GO:0008745	0.0448498	0	2.83597	0	17	N-acetylmuramoyl-L-alanine amidase activity	under	MF	norm3847
GO:0004965	0.0448498	0	2.83597	0	17	G-protein coupled GABA receptor activity	under	MF	norm3847
GO:0070001	0.0454127	0.406764	8.84154	4	53	aspartic-type peptidase activity	under	MF	norm3847
GO:0004190	0.0454127	0.406764	8.84154	4	53	aspartic-type endopeptidase activity	under	MF	norm3847
GO:0016021	2.33e-12	0.558409	284.841	199	1566	integral component of membrane	under	CC	norm3847
GO:0031224	3.8e-12	0.562003	285.023	200	1567	intrinsic component of membrane	under	CC	norm3847
GO:0016020	7.21e-12	0.607351	503.473	411	2768	membrane	under	CC	norm3847
GO:0019012	7.24e-12	0	22.9182	0	126	virion	under	CC	norm3847
GO:0044423	7.24e-12	0	22.9182	0	126	virion part	under	CC	norm3847
GO:0019028	8.9e-12	0	22.7363	0	125	viral capsid	under	CC	norm3847
GO:0044425	8.72e-06	0.709338	313.58	258	1724	membrane part	under	CC	norm3847
GO:0098687	0.0218833	0	3.45592	0	19	chromosomal region	under	CC	norm3847
GO:0030286	0.0246699	0.255385	6.72996	2	37	dynein complex	under	CC	norm3847
GO:0005667	0.0258663	0.165671	5.09294	1	28	transcription factor complex	under	CC	norm3847
GO:0000775	0.0400558	0	2.91025	0	16	chromosome, centromeric region	under	CC	norm3847
GO:0005815	0.0440573	0.352962	7.45752	3	41	microtubule organizing center	under	CC	norm3847
