# Supplementary material for: Combined transcriptome and proteome profiling reveals specific molecular brain signatures for sex, maturation and circalunar clock phase
Source: eLife. 2019 Feb 15;8:e41556. doi: 10.7554/eLife.41556 (PMC6377233; doi:10.7554/eLife.41556)
Supplement: Figure 5—source data 5. — Table containing the over-and under-represented GO-terms shared between the labelled 2,290 proteins and the unlabelled 3,847 proteins sets. GO-terms are shown with p-values, actual counts, expected counts, number of IDs per category for both set, respectively; as well as ontology (Molecular Function, Biological Process, Cellular Compartment). [file elife-41556-fig5-data5.xlsx]

## Sheet: OVER
GO_id	Term	pvalue.norm2290	ExpCount.norm2290	Count.norm2290	Size.norm2290	pvalue.gerner	ExpCount.gerner	Count.gerner	Size.gerner	ontology
GO:0000159	protein phosphatase type 2A complex	0.00133513	0.330874	3	3	0.00600152	0.545672	3	3	CC
GO:0000166	nucleotide binding	7.05e-09	196.324	270	1884	2.65e-13	310.888	424	1884	MF
GO:0000413	protein peptidyl-prolyl isomerization	0.00231504	3.09042	9	28	0.00148576	4.8888	12	28	BP
GO:0000786	nucleosome	1.26e-05	3.97048	14	36	0.00279008	6.54807	14	36	CC
GO:0001678	cellular glucose homeostasis	0.0112944	0.55186	3	5	0.0402183	0.872999	3	5	BP
GO:0001883	purine nucleoside binding	8.25e-11	27.0207	63	256	6.18e-16	42.7063	96	256	MF
GO:0002161	aminoacyl-tRNA editing activity	0.022212	1.16105	4	11	0.0245525	1.83504	5	11	MF
GO:0003723	RNA binding	4.72e-07	48.975	84	464	0.000704513	76.5051	103	459	MF
GO:0003743	translation initiation factor activity	8.8e-07	3.69424	15	35	0.000235767	5.83875	15	35	MF
GO:0003746	translation elongation factor activity	0.00323088	2.11099	7	20	0.00284094	3.33643	9	20	MF
GO:0003755	peptidyl-prolyl cis-trans isomerase activity	0.00223906	3.06094	9	29	0.00143106	4.83783	12	29	MF
GO:0003779	actin binding	1.7e-05	5.56597	17	53	5.46e-05	8.80691	21	53	MF
GO:0003924	GTPase activity	7.98e-11	9.18282	32	87	1.62e-10	14.5135	40	87	MF
GO:0003954	NADH dehydrogenase activity	0.00160235	1.89989	7	18	0.00534189	3.00279	8	18	MF
GO:0003980	UDP-glucose:glycoprotein glucosyltransferase activity	0.0111345	0.211099	2	2	0.0278202	0.333643	2	2	MF
GO:0003995	acyl-CoA dehydrogenase activity	8.94e-05	1.68879	8	16	4.25e-07	2.66914	12	16	MF
GO:0004017	adenylate kinase activity	0.00996186	0.527748	3	5	0.0033496	0.834108	4	5	MF
GO:0004075	biotin carboxylase activity	0.00432457	0.422199	3	4	0.000772937	0.667286	4	4	MF
GO:0004089	carbonate dehydratase activity	0.0305896	1.2666	4	12	0.00129333	2.00186	7	12	MF
GO:0004177	aminopeptidase activity	0.0272824	1.79434	5	17	0.0147096	2.83597	7	17	MF
GO:0004197	cysteine-type endopeptidase activity	0.00818994	1.89442	6	18	0.0204932	2.99781	7	18	MF
GO:0004198	calcium-dependent cysteine-type endopeptidase activity	0.00770623	2.42764	7	23	0.0275896	3.8369	8	23	MF
GO:0004298	threonine-type endopeptidase activity	1.57e-06	2.95539	13	28	0.000233423	4.671	13	28	MF
GO:0004356	glutamate-ammonia ligase activity	0.000696389	1.68879	7	16	0.0100815	2.66914	7	16	MF
GO:0004364	glutathione transferase activity	0.000227738	0.738848	5	7	0.0001287	1.16775	6	7	MF
GO:0004375	glycine dehydrogenase (decarboxylating) activity	0.0111345	0.211099	2	2	0.0278202	0.333643	2	2	MF
GO:0004396	hexokinase activity	0.00996186	0.527748	3	5	0.0355579	0.834108	3	5	MF
GO:0004449	isocitrate dehydrogenase (NAD+) activity	0.00117392	0.316649	3	3	0.00463793	0.500465	3	3	MF
GO:0004450	isocitrate dehydrogenase (NADP+) activity	0.0310556	0.316649	2	3	0.00463793	0.500465	3	3	MF
GO:0004471	malate dehydrogenase (decarboxylating) (NAD+) activity	0.00432457	0.422199	3	4	0.0162329	0.667286	3	4	MF
GO:0004655	porphobilinogen synthase activity	0.0111345	0.211099	2	2	0.0278202	0.333643	2	2	MF
GO:0004656	procollagen-proline 4-dioxygenase activity	0.00117392	0.316649	3	3	0.00463793	0.500465	3	3	MF
GO:0004674	protein serine/threonine kinase activity	0.0025377	7.49403	16	71	0.000197956	11.5031	24	69	MF
GO:0004731	purine-nucleoside phosphorylase activity	0.0111345	0.211099	2	2	0.0278202	0.333643	2	2	MF
GO:0004739	pyruvate dehydrogenase (acetyl-transferring) activity	0.0111345	0.211099	2	2	0.0278202	0.333643	2	2	MF
GO:0004866	endopeptidase inhibitor activity	0.0376853	4.64418	9	44	0.00341213	2.82862	8	17	MF
GO:0005044	scavenger receptor activity	0.0214779	7.81067	14	74	0.0321142	12.3448	19	74	MF
GO:0005200	structural constituent of cytoskeleton	4.32e-07	2.32209	12	22	8.37e-06	3.67007	13	22	MF
GO:0005344	oxygen carrier activity	0.0111345	0.211099	2	2	0.0278202	0.333643	2	2	MF
GO:0005509	calcium ion binding	6.32e-15	57.8412	119	548	2.83e-16	91.4182	167	548	MF
GO:0005515	protein binding	3.94e-05	401.092	467	3841	6.71e-17	610.342	776	3710	MF
GO:0005523	tropomyosin binding	0.0111345	0.211099	2	2	0.0278202	0.333643	2	2	MF
GO:0005525	GTP binding	8.25e-11	27.0207	63	256	6.18e-16	42.7063	96	256	MF
GO:0005536	glucose binding	0.00996186	0.527748	3	5	0.0355579	0.834108	3	5	MF
GO:0005543	phospholipid binding	0.00174554	4.10335	11	39	0.00290233	6.49439	14	39	MF
GO:0005544	calcium-dependent phospholipid binding	8.68e-05	0.949947	6	9	0.00113702	1.50139	6	9	MF
GO:0005622	intracellular	2.47e-46	227.2	384	2060	1.12e-27	374.695	522	2060	CC
GO:0005623	cell	1.8e-41	252.236	400	2287	2.66e-26	415.984	560	2287	CC
GO:0005737	cytoplasm	4.38e-14	24.8455	65	270	4.39e-10	44.3358	84	270	CC
GO:0005739	mitochondrion	2.03e-05	9.81592	24	89	0.00701239	16.1883	26	89	CC
GO:0005740	mitochondrial envelope	0.00025988	5.62485	15	51	0.002655	9.27643	18	51	CC
GO:0005743	mitochondrial inner membrane	0.00521417	2.856	8	26	0.0268304	6.00239	11	33	CC
GO:0005783	endoplasmic reticulum	0.000180192	9.15417	21	83	2.57e-05	15.0969	31	83	CC
GO:0005839	proteasome core complex	0.000528181	1.64067	7	15	0.010425	2.71746	7	15	CC
GO:0005852	eukaryotic translation initiation factor 3 complex	2.33e-06	1.87495	10	17	0.00021283	3.09214	10	17	CC
GO:0005853	eukaryotic translation elongation factor 1 complex	0.00490088	0.441165	3	4	0.02074	0.727563	3	4	CC
GO:0005856	cytoskeleton	0.00199846	5.41677	13	51	0.0094778	30.5369	43	172	CC
GO:0005869	dynactin complex	0.0332458	0.772038	3	7	0.0239015	1.27323	4	7	CC
GO:0005874	microtubule	8.58e-06	3.86019	14	35	0.000602325	6.36617	15	35	CC
GO:0005885	Arp2/3 protein complex	1.92e-07	0.772038	7	7	6.46e-06	1.27323	7	7	CC
GO:0006012	galactose metabolic process	0.00392464	0.772604	4	7	0.0207386	1.2222	4	7	BP
GO:0006072	glycerol-3-phosphate metabolic process	0.00492173	0.441488	3	4	0.0184796	0.6984	3	4	BP
GO:0006081	cellular aldehyde metabolic process	0.000909977	1.76595	7	16	0.0432067	2.09233	5	12	BP
GO:0006082	organic acid metabolic process	7.03e-15	35.8331	85	326	5.43e-12	62.6814	115	359	BP
GO:0006084	acetyl-CoA metabolic process	0.00067331	0.55186	4	5	0.000161467	0.872999	5	5	BP
GO:0006086	acetyl-CoA biosynthetic process from pyruvate	0.0121718	0.220744	2	2	0.0304701	0.3492	2	2	BP
GO:0006090	pyruvate metabolic process	0.000145757	3.19543	11	29	0.00211816	5.05842	12	29	BP
GO:0006091	generation of precursor metabolites and energy	1.99e-05	10.375	25	94	0.000185882	16.4124	31	94	BP
GO:0006096	glycolytic process	0.00173868	2.98005	9	27	0.0122035	4.7142	10	27	BP
GO:0006099	tricarboxylic acid cycle	0.00045558	2.53856	9	23	0.000768119	4.0158	11	23	BP
GO:0006102	isocitrate metabolic process	0.033833	0.331116	2	3	0.00531485	0.5238	3	3	BP
GO:0006108	malate metabolic process	0.00028155	0.772604	5	7	0.00247994	1.2222	5	7	BP
GO:0006163	purine nucleotide metabolic process	0.0147644	2.72465	7	25	1.63e-05	23.0472	43	132	BP
GO:0006165	nucleoside diphosphate phosphorylation	0.006759	4.19414	10	38	0.00343341	6.6348	14	38	BP
GO:0006206	pyrimidine nucleobase metabolic process	0.00716685	0.882977	4	8	0.0358146	1.3968	4	8	BP
GO:0006333	chromatin assembly or disassembly	1.08e-05	2.53856	11	23	0.000768119	4.0158	11	23	BP
GO:0006334	nucleosome assembly	3.48e-06	2.31781	11	21	0.000281863	3.6666	11	21	BP
GO:0006413	translational initiation	0.000658213	2.64893	9	24	0.0157011	4.1904	9	24	BP
GO:0006414	translational elongation	0.0125136	2.64893	7	24	0.0157011	4.1904	9	24	BP
GO:0006457	protein folding	3.57e-11	14.7899	43	134	9.9e-09	23.3964	51	134	BP
GO:0006471	protein ADP-ribosylation	0.0207458	0.662232	3	6	0.0103051	1.0476	4	6	BP
GO:0006511	ubiquitin-dependent protein catabolic process	0.000233331	9.27125	21	84	0.00374376	14.6664	25	84	BP
GO:0006518	peptide metabolic process	9.67e-08	49.1277	86	446	0.0281246	1.89825	5	11	BP
GO:0006520	cellular amino acid metabolic process	7.68e-07	24.7921	50	225	0.00164424	39.2464	57	225	BP
GO:0006537	glutamate biosynthetic process	0.0121718	0.220744	2	2	0.0304701	0.3492	2	2	BP
GO:0006542	glutamine biosynthetic process	4.32e-05	1.21409	7	11	0.000836999	1.9206	7	11	BP
GO:0006546	glycine catabolic process	0.033833	0.331116	2	3	0.00531485	0.5238	3	3	BP
GO:0006564	L-serine biosynthetic process	0.0121718	0.220744	2	2	0.0304701	0.3492	2	2	BP
GO:0006729	tetrahydrobiopterin biosynthetic process	0.033833	0.331116	2	3	0.00531485	0.5238	3	3	BP
GO:0006730	one-carbon metabolic process	0.00154064	1.43484	6	13	0.000475421	2.2698	8	13	BP
GO:0006732	coenzyme metabolic process	0.00380567	5.14147	12	47	0.000522336	8.16153	18	47	BP
GO:0006733	oxidoreduction coenzyme metabolic process	0.000272979	5.62898	15	51	0.00169411	8.90459	18	51	BP
GO:0006779	porphyrin-containing compound biosynthetic process	0.0207458	0.662232	3	6	0.0103051	1.0476	4	6	BP
GO:0006793	phosphorus metabolic process	0.00128468	0.975755	5	9	0.000446017	154.87	192	887	BP
GO:0006873	cellular ion homeostasis	0.0333617	0.772604	3	7	0.0207386	1.2222	4	7	BP
GO:0006875	cellular metal ion homeostasis	0.0333617	0.772604	3	7	0.0207386	1.2222	4	7	BP
GO:0006886	intracellular protein transport	0.000150555	16.4454	32	149	4e-08	24.9239	52	143	BP
GO:0006892	post-Golgi vesicle-mediated transport	0.0121718	0.220744	2	2	0.0304701	0.3492	2	2	BP
GO:0006897	endocytosis	0.00420583	1.21218	5	11	8.41e-05	1.91777	8	11	BP
GO:0006898	receptor-mediated endocytosis	0.033833	0.331116	2	3	0.00531485	0.5238	3	3	BP
GO:0007010	cytoskeleton organization	1.93e-06	13.4442	32	122	0.0293445	12.2588	19	71	BP
GO:0007015	actin filament organization	1.99e-08	4.19414	18	38	2.35e-08	6.6348	22	38	BP
GO:0007034	vacuolar transport	0.00253926	1.10372	5	10	0.0187319	1.746	5	10	BP
GO:0007155	cell adhesion	0.000602405	13.355	26	121	0.00118829	21.1266	35	121	BP
GO:0007160	cell-matrix adhesion	4.78e-05	2.42819	10	22	0.00215887	3.8412	10	22	BP
GO:0007219	Notch signaling pathway	0.00415017	2.20744	7	20	0.00704581	3.13971	8	18	BP
GO:0007264	small GTPase mediated signal transduction	0.00487695	21.6329	34	196	7.56e-07	34.2216	62	196	BP
GO:0007268	chemical synaptic transmission	0.00660698	1.32446	5	12	0.0434359	2.0952	5	12	BP
GO:0007269	neurotransmitter secretion	0.0112944	0.55186	3	5	0.00398716	0.872999	4	5	BP
GO:0008021	synaptic vesicle	0.00133513	0.330874	3	3	0.00600152	0.545672	3	3	CC
GO:0008064	regulation of actin polymerization or depolymerization	2.93e-08	2.31781	13	21	5.88e-09	3.6666	16	21	BP
GO:0008137	NADH dehydrogenase (ubiquinone) activity	0.00107659	1.79434	7	17	0.00346999	2.83597	8	17	MF
GO:0008144	drug binding	0.0256996	153.516	176	1462	0.0281552	19.5555	28	119	MF
GO:0008289	lipid binding	0.000183617	4.29495	13	41	0.00475624	6.80694	14	41	MF
GO:0008299	isoprenoid biosynthetic process	0.0353685	1.32446	4	12	0.00995169	2.0952	6	12	BP
GO:0008483	transaminase activity	8.94e-05	1.68879	8	16	0.00214894	2.66914	8	16	MF
GO:0008641	ubiquitin-like modifier activating enzyme activity	0.0115272	1.4777	5	14	0.0191107	2.3355	6	14	MF
GO:0009055	electron transfer activity	0.00238687	8.12732	17	77	0.00623355	12.8453	22	77	MF
GO:0009064	glutamine family amino acid metabolic process	1.56e-05	3.53191	13	32	2.49e-05	5.5872	16	32	BP
GO:0009116	nucleoside metabolic process	0.00197179	5.40823	13	49	0.00320448	5.92443	13	34	BP
GO:0009126	purine nucleoside monophosphate metabolic process	6.28e-07	8.16753	24	74	7.69e-06	12.9204	29	74	BP
GO:0009135	purine nucleoside diphosphate metabolic process	0.00173868	2.98005	9	27	0.0122035	4.7142	10	27	BP
GO:0009142	nucleoside triphosphate biosynthetic process	3.1e-05	6.40158	18	58	0.000488175	10.1268	21	58	BP
GO:0009144	purine nucleoside triphosphate metabolic process	1.41e-06	8.49865	24	77	0.000151472	13.4442	27	77	BP
GO:0009152	purine ribonucleotide biosynthetic process	0.00127614	11.1476	22	101	0.000142881	17.6346	33	101	BP
GO:0009168	purine ribonucleoside monophosphate biosynthetic process	2.33e-06	5.96009	19	54	3.53e-06	9.42839	24	54	BP
GO:0009185	ribonucleoside diphosphate metabolic process	0.00173868	2.98005	9	27	0.0122035	4.7142	10	27	BP
GO:0009199	ribonucleoside triphosphate metabolic process	1.41e-06	8.49865	24	77	0.000151472	13.4442	27	77	BP
GO:0009206	purine ribonucleoside triphosphate biosynthetic process	1.81e-05	6.18084	18	56	0.00028026	9.77759	21	56	BP
GO:0009259	ribonucleotide metabolic process	9.78e-05	14.0173	29	127	7.49e-05	22.1742	40	127	BP
GO:0009303	rRNA transcription	0.0112944	0.55186	3	5	0.0402183	0.872999	3	5	BP
GO:0009448	gamma-aminobutyric acid metabolic process	0.0121718	0.220744	2	2	0.0304701	0.3492	2	2	BP
GO:0010638	positive regulation of organelle organization	0.000208882	1.87633	8	17	1.96e-05	2.9682	11	17	BP
GO:0010639	negative regulation of organelle organization	0.00370017	1.65558	6	15	0.00852955	2.619	7	15	BP
GO:0012505	endomembrane system	0.0286972	2.43374	6	23	0.0296771	9.12337	15	52	CC
GO:0012506	vesicle membrane	0.000114352	2.64699	10	24	0.001675	4.36538	11	24	CC
GO:0015833	peptide transport	0.000958079	21.1914	36	192	5.83e-08	33.5232	64	192	BP
GO:0015986	ATP synthesis coupled proton transport	0.000339795	1.9867	8	18	0.0260928	3.1428	7	18	BP
GO:0015991	ATP hydrolysis coupled proton transport	0.000404056	3.53191	11	32	0.0408669	5.5872	10	32	BP
GO:0016192	vesicle-mediated transport	4.65e-05	14.1543	30	129	7.27e-08	18.6704	42	108	BP
GO:0016272	prefoldin complex	0.000109952	0.992621	6	9	0.001814	1.63702	6	9	CC
GO:0016459	myosin complex	0.0387556	3.97048	8	36	0.000861644	6.54807	15	36	CC
GO:0016469	proton-transporting two-sector ATPase complex	0.000110906	1.74604	8	16	0.0105806	8.18508	15	45	CC
GO:0016491	oxidoreductase activity	5.13e-11	82.1803	141	790	2.52e-10	93.198	151	570	MF
GO:0016597	amino acid binding	0.022212	1.16105	4	11	0.00461513	1.83504	6	11	MF
GO:0016615	malate dehydrogenase activity	0.00993016	0.527154	3	5	0.0354938	0.833555	3	5	MF
GO:0016616	oxidoreductase activity, acting on the CH-OH group of donors, NAD or NADP as acceptor	7.4e-07	5.04491	18	48	3.56e-07	8.99402	25	54	MF
GO:0016655	oxidoreductase activity, acting on NAD(P)H, quinone or similar compound as acceptor	0.00107659	1.79434	7	17	0.00346999	2.83597	8	17	MF
GO:0016668	oxidoreductase activity, acting on a sulfur group of donors, NAD(P) as acceptor	0.0296464	0.738848	3	7	0.0176658	1.16775	4	7	MF
GO:0016748	succinyltransferase activity	0.0111345	0.211099	2	2	0.0278202	0.333643	2	2	MF
GO:0016763	transferase activity, transferring pentosyl groups	0.0107909	5.7987	12	55	0.00653742	9.1691	17	55	MF
GO:0016805	dipeptidase activity	0.00996186	0.527748	3	5	0.0033496	0.834108	4	5	MF
GO:0016853	isomerase activity	0.000135051	14.8825	30	141	0.000340344	23.5218	40	141	MF
GO:0016861	intramolecular oxidoreductase activity, interconverting aldoses and ketoses	0.00545667	1.2666	5	12	0.0364208	2.00186	5	12	MF
GO:0016868	intramolecular transferase activity, phosphotransferases	0.043773	0.844397	3	8	0.0046164	1.33457	5	8	MF
GO:0016874	ligase activity	5.3e-06	21.321	43	202	0.0276716	22.8988	32	138	MF
GO:0016880	acid-ammonia (or amide) ligase activity	0.000696389	1.68879	7	16	0.0100815	2.66914	7	16	MF
GO:0016903	oxidoreductase activity, acting on the aldehyde or oxo group of donors	0.0304168	1.26442	4	12	0.0117676	4.00372	9	24	MF
GO:0016999	antibiotic metabolic process	3.99e-05	3.31116	12	30	0.000205904	5.238	14	30	BP
GO:0019001	guanyl nucleotide binding	1.65e-10	27.4429	63	260	1.96e-15	43.3736	96	260	MF
GO:0019363	pyridine nucleotide biosynthetic process	0.0011534	4.52525	12	41	0.0188384	7.15859	13	41	BP
GO:0019725	cellular homeostasis	0.00224813	1.52034	6	14	0.000869015	2.41698	8	14	BP
GO:0019752	carboxylic acid metabolic process	5.24e-06	4.65994	16	44	0.00172426	3.73299	10	22	BP
GO:0019773	proteasome core complex, alpha-subunit complex	0.00152174	1.43379	6	13	0.0191318	2.36458	6	13	CC
GO:0019825	oxygen binding	1.62e-06	1.79434	10	17	0.000102124	2.83597	10	17	MF
GO:0019829	cation-transporting ATPase activity	0.00342897	1.15693	5	11	0.000810639	4.00372	11	24	MF
GO:0019842	vitamin binding	3.03e-05	11.1883	26	106	0.000169538	17.6831	33	106	MF
GO:0020037	heme binding	0.0262869	18.3656	27	174	0.0118191	29.027	41	174	MF
GO:0022411	cellular component disassembly	0.00698553	2.98005	8	27	0.034457	4.7142	9	27	BP
GO:0022607	cellular component assembly	6.89e-07	21.964	46	199	2.97e-06	34.7454	61	199	BP
GO:0022853	active ion transmembrane transporter activity	1.47e-06	2.53319	12	24	0.000810639	4.00372	11	24	MF
GO:0023061	signal release	0.0490787	0.882977	3	8	0.0358146	1.3968	4	8	BP
GO:0030060	L-malate dehydrogenase activity	0.0111345	0.211099	2	2	0.0278202	0.333643	2	2	MF
GO:0030117	membrane coat	1.92e-06	5.40427	18	49	7.92e-07	8.91264	24	49	CC
GO:0030125	clathrin vesicle coat	0.0112495	0.551456	3	5	0.0448689	0.909454	3	5	CC
GO:0030126	COPI vesicle coat	0.00712283	0.882329	4	8	0.0410208	1.45513	4	8	CC
GO:0030131	clathrin adaptor complex	0.011715	0.992621	4	9	0.001814	1.63702	6	9	CC
GO:0030133	transport vesicle	0.0110512	0.548	3	5	0.00458666	0.906	4	5	CC
GO:0030137	COPI-coated vesicle	0.00712283	0.882329	4	8	0.0410208	1.45513	4	8	CC
GO:0030145	manganese ion binding	0.0100729	0.949947	4	9	0.0481149	1.50139	4	9	MF
GO:0030163	protein catabolic process	3.84e-08	13.2446	35	120	2.66e-06	20.952	42	120	BP
GO:0030170	pyridoxal phosphate binding	0.000175397	7.17738	18	68	0.00272628	11.3439	21	68	MF
GO:0030658	transport vesicle membrane	0.013739	1.54408	5	14	0.0284364	2.54647	6	14	CC
GO:0030660	Golgi-associated vesicle membrane	0.000299718	2.42641	9	22	0.00293441	4.0016	10	22	CC
GO:0030662	coated vesicle membrane	7.39e-05	2.5367	10	23	0.00108303	4.18349	11	23	CC
GO:0030791	arsenite methyltransferase activity	0.00117392	0.316649	3	3	0.00463793	0.500465	3	3	MF
GO:0030835	negative regulation of actin filament depolymerization	0.00184287	0.662232	4	6	0.000828188	1.0476	5	6	BP
GO:0030837	negative regulation of actin filament polymerization	0.00028155	0.772604	5	7	0.000167485	1.2222	6	7	BP
GO:0030838	positive regulation of actin filament polymerization	6.77e-05	1.65558	8	15	3.06e-06	2.619	11	15	BP
GO:0031090	organelle membrane	0.00407908	10.0112	19	92	0.00247083	16.6116	28	92	CC
GO:0031333	negative regulation of protein complex assembly	0.00028155	0.772604	5	7	0.000167485	1.2222	6	7	BP
GO:0031334	positive regulation of protein complex assembly	6.77e-05	1.65558	8	15	3.06e-06	2.619	11	15	BP
GO:0031369	translation initiation factor binding	0.00996186	0.527748	3	5	0.0355579	0.834108	3	5	MF
GO:0031406	carboxylic acid binding	0.0343468	1.8965	5	18	0.00528616	2.99781	8	18	MF
GO:0031543	peptidyl-proline dioxygenase activity	0.00117392	0.316649	3	3	0.00463793	0.500465	3	3	MF
GO:0031683	G-protein beta/gamma-subunit complex binding	0.0154016	1.0555	4	10	0.0154901	1.66822	5	10	MF
GO:0031975	envelope	0.000998729	8.93359	19	81	4.17e-05	14.7331	30	81	CC
GO:0032271	regulation of protein polymerization	2.93e-08	2.31781	13	21	5.88e-09	3.6666	16	21	BP
GO:0032535	regulation of cellular component size	1.33e-07	2.53856	13	23	4.22e-09	4.0158	17	23	BP
GO:0032549	ribonucleoside binding	4.5e-10	28.0762	63	266	3.53e-15	44.3745	97	266	MF
GO:0032555	purine ribonucleotide binding	1.78e-05	168.879	219	1600	1.48e-08	266.914	348	1600	MF
GO:0032956	regulation of actin cytoskeleton organization	4.89e-07	2.7593	13	25	2.91e-07	4.365	16	25	BP
GO:0032991	protein-containing complex	3.67e-12	96.0947	157	944	0.0227399	118.945	138	722	CC
GO:0033180	proton-transporting V-type ATPase, V1 domain	0.000675597	0.882329	5	8	0.00678221	1.45513	5	8	CC
GO:0033500	carbohydrate homeostasis	0.0112944	0.55186	3	5	0.0402183	0.872999	3	5	BP
GO:0034311	diol metabolic process	0.033833	0.331116	2	3	0.00531485	0.5238	3	3	BP
GO:0034314	Arp2/3 complex-mediated actin nucleation	2.61e-06	1.21409	8	11	5.8e-06	1.9206	9	11	BP
GO:0034622	cellular protein-containing complex assembly	4.05e-09	10.5957	32	96	3.35e-08	13.9413	35	80	BP
GO:0035383	thioester metabolic process	0.00392464	0.772604	4	7	0.000167485	1.2222	6	7	BP
GO:0042558	pteridine-containing compound metabolic process	0.00977345	1.43484	5	13	0.00314276	2.2698	7	13	BP
GO:0043022	ribosome binding	0.00332825	0.738848	4	7	0.0176658	1.16775	4	7	MF
GO:0043101	purine-containing compound salvage	0.0490787	0.882977	3	8	0.0358146	1.3968	4	8	BP
GO:0043168	anion binding	5.63e-06	170.532	224	1652	9.93e-10	270.603	359	1652	MF
GO:0043228	non-membrane-bounded organelle	2.52e-10	71.1378	121	645	1.62e-05	117.32	157	645	CC
GO:0043229	intracellular organelle	4.08e-05	76.7036	108	780	0.0122491	130.968	153	774	CC
GO:0043242	negative regulation of protein complex disassembly	0.00392464	0.772604	4	7	0.00247994	1.2222	5	7	BP
GO:0043564	Ku70:Ku80 complex	0.0121446	0.220582	2	2	0.0330545	0.363781	2	2	CC
GO:0043624	cellular protein complex disassembly	0.00312239	2.64893	8	24	0.0157011	4.1904	9	24	BP
GO:0043632	modification-dependent macromolecule catabolic process	0.000233331	9.27125	21	84	0.00374376	14.6664	25	84	BP
GO:0043933	protein-containing complex subunit organization	0.000444054	13.8044	27	126	0.000596425	21.9216	37	126	BP
GO:0044087	regulation of cellular component biogenesis	3.31e-07	3.09042	14	28	3.69e-07	4.8888	17	28	BP
GO:0044248	cellular catabolic process	0.000535132	29.0183	47	264	0.00271588	51.0876	70	293	BP
GO:0044267	cellular protein metabolic process	0.0328955	97.9339	115	921	0.00754182	235.702	268	1351	BP
GO:0044272	sulfur compound biosynthetic process	0.0346728	2.53856	6	23	0.0352945	4.0158	8	23	BP
GO:0044281	small molecule metabolic process	2.11e-05	4.57721	15	45	0.000332709	45.7882	68	275	BP
GO:0044282	small molecule catabolic process	0.00706039	0.879341	4	8	0.00269464	7.15859	15	41	BP
GO:0044283	small molecule biosynthetic process	1.84e-05	19.6462	39	178	0.000118988	18.9178	35	109	BP
GO:0044444	cytoplasmic part	0.0213098	10.8652	18	116	0.00255178	67.8068	89	401	CC
GO:0044446	intracellular organelle part	6.49e-07	52.8932	87	498	1.42e-06	118.076	163	655	CC
GO:0044877	protein-containing complex binding	0.00653332	2.93502	8	28	0.0323028	4.64649	9	28	MF
GO:0045184	establishment of protein localization	0.000868086	21.0811	36	191	1.15e-07	33.3486	63	191	BP
GO:0045333	cellular respiration	0.011271	5.84972	12	53	0.0339761	9.25379	15	53	BP
GO:0045335	phagocytic vesicle	0.0121446	0.220582	2	2	0.0330545	0.363781	2	2	CC
GO:0045454	cell redox homeostasis	3.56e-07	9.05051	26	82	9.09e-07	14.3172	33	82	BP
GO:0046031	ADP metabolic process	0.00173868	2.98005	9	27	0.0122035	4.7142	10	27	BP
GO:0046034	ATP metabolic process	8.06e-07	7.17418	22	65	0.00103999	11.349	22	65	BP
GO:0046112	nucleobase biosynthetic process	0.0353685	1.32446	4	12	0.0434359	2.0952	5	12	BP
GO:0046390	ribose phosphate biosynthetic process	0.000695724	11.3683	23	103	9.07e-05	17.9838	34	103	BP
GO:0046394	carboxylic acid biosynthetic process	2.21e-05	11.6994	27	106	0.000983049	9.22197	19	53	BP
GO:0046496	nicotinamide nucleotide metabolic process	9.83e-05	5.18749	15	47	0.00453674	8.20619	16	47	BP
GO:0046527	glucosyltransferase activity	0.00996186	0.527748	3	5	0.0355579	0.834108	3	5	MF
GO:0046835	carbohydrate phosphorylation	0.000682423	0.882977	5	8	0.00566263	1.3968	5	8	BP
GO:0046903	secretion	0.0453351	4.08377	8	37	0.000795698	6.4602	15	37	BP
GO:0046907	intracellular transport	0.0106301	3.80555	9	35	0.000317892	6.00021	15	35	BP
GO:0046961	proton-transporting ATPase activity, rotational mechanism	0.000696389	1.68879	7	16	0.0378612	2.66914	6	16	MF
GO:0048522	positive regulation of cellular process	0.0150718	7.5053	14	68	0.0406865	11.8728	18	68	BP
GO:0050660	flavin adenine dinucleotide binding	0.0358369	8.33842	14	79	0.000115485	13.1789	27	79	MF
GO:0050662	coenzyme binding	0.0227183	10.1402	17	98	0.0257959	16.107	24	98	MF
GO:0051015	actin filament binding	6.29e-06	2.00544	10	19	7.52e-07	3.16961	13	19	MF
GO:0051082	unfolded protein binding	2.77e-06	7.59958	22	72	5.35e-05	12.0112	26	72	MF
GO:0051188	cofactor biosynthetic process	0.000117477	10.7926	24	98	7.12e-05	17.0807	33	98	BP
GO:0051287	NAD binding	1.71e-07	5.59413	20	53	1.63e-05	8.84154	22	53	MF
GO:0051536	iron-sulfur cluster binding	0.00518852	8.02177	16	76	0.00235721	12.6784	23	76	MF
GO:0051603	proteolysis involved in cellular protein catabolic process	1.73e-06	10.9268	28	99	0.000224007	17.2854	32	99	BP
GO:0051641	cellular localization	0.0297322	1.83535	5	17	0.00488677	0.509356	3	3	BP
GO:0051694	pointed-end actin filament capping	0.0121718	0.220744	2	2	0.0304701	0.3492	2	2	BP
GO:0051920	peroxiredoxin activity	0.00610217	0.844397	4	8	0.0046164	1.33457	5	8	MF
GO:0055114	oxidation-reduction process	3.93e-11	90.655	151	823	5.5e-13	145.092	224	831	BP
GO:0060589	nucleoside-triphosphatase regulator activity	0.0484957	4.85528	9	46	0.000232761	7.67379	18	46	MF
GO:0065008	regulation of biological quality	9.99e-15	20.9707	60	190	4.12e-10	29.3783	63	169	BP
GO:0070011	peptidase activity, acting on L-amino acid peptides	0.0130256	64.4908	82	611	0.0350484	101.928	119	611	MF
GO:0070727	cellular macromolecule localization	5.49e-05	18.4321	36	167	2.37e-09	29.1582	61	167	BP
GO:0071616	acyl-CoA biosynthetic process	0.00134117	0.331116	3	3	0.00531485	0.5238	3	3	BP
GO:0071705	nitrogen compound transport	0.0468514	28.0345	37	254	9.19e-06	44.3484	72	254	BP
GO:0071824	protein-DNA complex subunit organization	0.000147989	3.20079	11	29	0.00711647	5.0634	11	29	BP
GO:0072350	tricarboxylic acid metabolic process	0.000450222	2.53457	9	23	0.000758216	4.00988	11	23	BP
GO:0072524	pyridine-containing compound metabolic process	0.000198317	6.07046	16	55	0.00435154	9.60299	18	55	BP
GO:0090382	phagosome maturation	0.0121718	0.220744	2	2	0.0304701	0.3492	2	2	BP
GO:0090662	ATP hydrolysis coupled transmembrane transport	0.000404056	3.53191	11	32	0.0408669	5.5872	10	32	BP
GO:0097367	carbohydrate derivative binding	9.05e-05	177.746	224	1684	7.8e-08	279.852	358	1679	MF
GO:0098655	cation transmembrane transport	0.000666555	12.0306	24	109	0.00573829	19.0314	30	109	BP
GO:0098660	inorganic ion transmembrane transport	0.00023721	10.5957	23	96	0.00308732	16.7616	28	96	BP
GO:0099503	secretory vesicle	0.00133513	0.330874	3	3	0.00600152	0.545672	3	3	CC
GO:0099537	trans-synaptic signaling	0.00660698	1.32446	5	12	0.0434359	2.0952	5	12	BP
GO:1901292	nucleoside phosphate catabolic process	0.00277271	4.96674	12	45	0.0179026	7.85699	14	45	BP
GO:1901564	organonitrogen compound metabolic process	0.00787346	157.109	184	1563	0.0316261	295.265	322	1770	BP
GO:1901575	organic substance catabolic process	2.15e-05	32.2059	56	293	0.000662066	56.1441	79	322	BP
GO:1901607	alpha-amino acid biosynthetic process	9.84e-05	4.63563	14	42	0.00352663	7.33319	15	42	BP
GO:1901879	regulation of protein depolymerization	0.00392464	0.772604	4	7	0.00247994	1.2222	5	7	BP
GO:1902600	proton transmembrane transport	2.56e-06	4.96674	17	45	0.00735136	7.85699	15	45	BP
GO:1902903	regulation of supramolecular fiber organization	4.89e-07	2.7593	13	25	2.91e-07	4.365	16	25	BP
GO:1903293	phosphatase complex	0.0112495	0.551456	3	5	0.0448689	0.909454	3	5	CC
GO:1905369	endopeptidase complex	1.3e-07	4.19107	17	38	0.000138774	6.91185	17	38	CC
GO:1990204	oxidoreductase complex	0.0329801	0.769707	3	7	0.00383975	1.81891	6	10	CC

## Sheet: UNDER
GO_id	Term	pvalue.norm2290	ExpCount.norm2290	Count.norm2290	Size.norm2290	pvalue.norm3847	ExpCount.norm3847	Count.norm3847	Size.norm3847	ontology
GO:0000270	peptidoglycan metabolic process	0.00284142	5.5186	0	50	6.63e-05	8.72999	0	50	BP
GO:0000278	mitotic cell cycle	0.0306372	5.07711	1	46	0.00826095	8.03159	2	46	BP
GO:0000988	transcription factor activity, protein binding	0.0428046	7.70512	3	73	0.0116365	12.178	5	73	MF
GO:0000990	transcription factor activity, core RNA polymerase binding	0.0250932	3.48314	0	33	0.00240604	5.50511	0	33	MF
GO:0000996	promoter selection factor activity	0.0250932	3.48314	0	33	0.00240604	5.50511	0	33	MF
GO:0001653	peptide receptor activity	0.00334981	5.38303	0	51	0.00100346	8.5079	1	51	MF
GO:0003676	nucleic acid binding	2.26e-15	297.228	187	2816	4.79e-33	469.77	268	2816	MF
GO:0003677	DNA binding	1.11e-28	158.008	48	1497	5.55e-43	249.732	82	1497	MF
GO:0003678	DNA helicase activity	0.00155741	15.1992	5	144	4.88e-05	24.0223	8	144	MF
GO:0003697	single-stranded DNA binding	0.000781124	6.75518	0	64	8.23e-06	10.6766	0	64	MF
GO:0003700	DNA binding transcription factor activity	1.53e-07	35.2536	10	334	3.87e-12	55.7184	15	334	MF
GO:0003707	steroid hormone receptor activity	0.0455261	4.64418	1	44	0.015428	7.34015	2	44	MF
GO:0003724	RNA helicase activity	0.0114707	4.22199	0	40	0.000668359	6.67286	0	40	MF
GO:0003887	DNA-directed DNA polymerase activity	0.000494576	9.49947	1	90	0.000373352	15.0139	4	90	MF
GO:0003968	RNA-directed 5'-3' RNA polymerase activity	0.0438821	2.95539	0	28	0.00600454	4.671	0	28	MF
GO:0004386	helicase activity	1.01e-05	26.5985	8	252	4.9e-09	42.039	12	252	MF
GO:0004518	nuclease activity	2.96e-07	29.2373	7	277	6.34e-12	46.2096	10	277	MF
GO:0004519	endonuclease activity	0.00022692	19.3156	6	183	5.29e-08	30.5283	7	183	MF
GO:0004520	endodeoxyribonuclease activity	0.010931	6.22743	1	59	0.00168967	9.84247	2	59	MF
GO:0004527	exonuclease activity	0.00409627	7.28293	1	69	0.000361761	11.5107	2	69	MF
GO:0004536	deoxyribonuclease activity	0.00249044	7.81067	1	74	0.000860299	12.3448	3	74	MF
GO:0004803	transposase activity	0.0490708	2.84984	0	27	0.00720938	4.50418	0	27	MF
GO:0004871	signal transducer activity	1.42e-12	61.5354	17	583	6.5e-13	97.257	40	583	MF
GO:0004888	transmembrane signaling receptor activity	2.62e-15	47.6029	6	451	6.68e-15	75.2365	22	451	MF
GO:0004930	G-protein coupled receptor activity	1.13e-15	35.6758	1	338	1.22e-19	56.3857	6	338	MF
GO:0005272	sodium channel activity	0.000498941	7.17738	0	68	0.00730815	11.3439	4	68	MF
GO:0005667	transcription factor complex	0.0375722	3.08815	0	28	0.0258663	5.09294	1	28	CC
GO:0005815	microtubule organizing center	0.0498495	4.52194	1	41	0.0440573	7.45752	3	41	CC
GO:0006022	aminoglycan metabolic process	1.64e-05	12.9135	1	117	0.000217615	20.4282	7	117	BP
GO:0006026	aminoglycan catabolic process	0.00443687	7.17418	1	65	0.000400121	11.349	2	65	BP
GO:0006027	glycosaminoglycan catabolic process	0.00727641	4.63563	0	42	0.000310215	7.33319	0	42	BP
GO:0006030	chitin metabolic process	0.00824876	6.51195	1	59	0.0410892	10.3014	5	59	BP
GO:0006139	nucleobase-containing compound metabolic process	9.2e-31	284.981	138	2582	2.04e-43	450.817	235	2582	BP
GO:0006259	DNA metabolic process	2.87e-35	120.306	19	1090	3.41e-53	190.314	35	1090	BP
GO:0006260	DNA replication	2.49e-16	39.7339	2	360	9.48e-21	62.856	8	360	BP
GO:0006261	DNA-dependent DNA replication	0.0101244	6.29121	1	57	0.00631246	9.95219	3	57	BP
GO:0006281	DNA repair	0.00107531	27.2619	13	247	6e-06	43.1262	19	247	BP
GO:0006304	DNA modification	1.99e-07	14.4587	0	131	1e-11	22.8726	0	131	BP
GO:0006305	DNA alkylation	3.6e-07	13.9069	0	126	2.65e-11	21.9996	0	126	BP
GO:0006306	DNA methylation	3.6e-07	13.9069	0	126	2.65e-11	21.9996	0	126	BP
GO:0006310	DNA recombination	4.44e-09	23.5092	2	213	2.17e-13	37.1898	4	213	BP
GO:0006313	transposition, DNA-mediated	0.0376456	3.09042	0	28	0.00460246	4.8888	0	28	BP
GO:0006351	transcription, DNA-templated	3.58e-17	88.6288	26	803	1.64e-22	140.204	50	803	BP
GO:0006352	DNA-templated transcription, initiation	0.00546035	6.95344	1	63	0.000555325	10.9998	2	63	BP
GO:0006355	regulation of transcription, DNA-templated	5.6e-17	76.2671	19	691	8.26e-23	120.649	37	691	BP
GO:0006725	cellular aromatic compound metabolic process	2.77e-26	292.376	155	2649	3.81e-38	462.515	258	2649	BP
GO:0006807	nitrogen compound metabolic process	3.48e-06	511.354	442	4633	5.83e-16	808.921	660	4633	BP
GO:0006814	sodium ion transport	0.00456421	8.94014	2	81	0.0191973	14.1426	7	81	BP
GO:0006974	cellular response to DNA damage stimulus	0.000505203	28.476	13	258	1.61e-06	45.0468	19	258	BP
GO:0007049	cell cycle	0.0313647	13.5758	7	123	0.00552528	21.4758	11	123	BP
GO:0007154	cell communication	3.47e-08	133.44	81	1209	0.000107145	211.091	166	1209	BP
GO:0007165	signal transduction	3.94e-09	128.915	74	1168	6.29e-05	203.933	158	1168	BP
GO:0007166	cell surface receptor signaling pathway	0.00718258	17.3284	8	157	0.014083	27.4122	17	157	BP
GO:0007167	enzyme linked receptor protein signaling pathway	0.020937	3.64228	0	33	0.0140749	5.7618	1	33	BP
GO:0007186	G-protein coupled receptor signaling pathway	2.22e-11	37.7472	6	342	8.3e-14	59.7132	15	342	BP
GO:0008033	tRNA processing	0.00744291	6.62232	1	60	0.000904853	10.476	2	60	BP
GO:0008080	N-acetyltransferase activity	0.00122274	6.33298	0	60	0.00621966	10.0093	3	60	MF
GO:0008168	methyltransferase activity	1.76e-07	40.0033	13	379	3.07e-10	63.2254	23	379	MF
GO:0008170	N-methyltransferase activity	8.28e-07	13.1937	0	125	2.13e-06	20.8527	4	125	MF
GO:0008173	RNA methyltransferase activity	0.0313804	3.27204	0	31	0.00346889	5.17147	0	31	MF
GO:0008270	zinc ion binding	1.32e-05	101.117	64	958	5.04e-10	159.815	95	958	MF
GO:0008378	galactosyltransferase activity	0.0280614	3.37759	0	32	0.00288901	5.33829	0	32	MF
GO:0008408	3'-5' exonuclease activity	0.00152976	6.12188	0	58	0.000313237	9.67565	1	58	MF
GO:0008417	fucosyltransferase activity	0.0438821	2.95539	0	28	0.03974	4.671	1	28	MF
GO:0008528	G-protein coupled peptide receptor activity	0.00334981	5.38303	0	51	0.00100346	8.5079	1	51	MF
GO:0009008	DNA-methyltransferase activity	0.0250932	3.48314	0	33	0.00240604	5.50511	0	33	MF
GO:0009058	biosynthetic process	0.00505327	244.364	211	2214	2.11e-08	386.564	302	2214	BP
GO:0009059	macromolecule biosynthetic process	6.65e-10	187.191	119	1696	3.89e-24	296.121	161	1696	BP
GO:0009219	pyrimidine deoxyribonucleotide metabolic process	0.0186182	3.75265	0	34	0.0119182	5.9364	1	34	BP
GO:0009253	peptidoglycan catabolic process	0.00727641	4.63563	0	42	0.000310215	7.33319	0	42	BP
GO:0009262	deoxyribonucleotide metabolic process	0.00818351	4.52525	0	41	0.00365523	7.15859	1	41	BP
GO:0009394	2'-deoxyribonucleotide metabolic process	0.0165559	3.86302	0	35	0.010085	6.111	1	35	BP
GO:0009451	RNA modification	0.000384168	7.39493	0	67	0.00536648	11.6982	4	67	BP
GO:0009719	response to endogenous stimulus	0.00155402	8.2779	1	75	0.000422612	13.095	3	75	BP
GO:0009725	response to hormone	0.00671426	6.7327	1	61	0.00352509	10.6506	3	61	BP
GO:0009755	hormone-mediated signaling pathway	0.00824876	6.51195	1	59	0.00106373	10.3014	2	59	BP
GO:0009889	regulation of biosynthetic process	2.75e-15	80.1301	24	726	1.43e-21	126.76	43	726	BP
GO:0010033	response to organic substance	0.0232425	11.3683	5	103	0.00378095	17.9838	8	103	BP
GO:0010467	gene expression	0.000675842	165.337	130	1498	1.76e-08	261.551	189	1498	BP
GO:0010468	regulation of gene expression	3.42e-14	80.2405	26	727	5.1e-20	126.934	46	727	BP
GO:0010556	regulation of macromolecule biosynthetic process	3.3e-15	79.9094	24	724	1.9e-21	126.41	43	724	BP
GO:0014070	response to organic cyclic compound	0.0301545	8.16753	3	74	0.00202058	12.9204	4	74	BP
GO:0015074	DNA integration	6.99e-12	27.1515	1	246	2.39e-18	42.9516	2	246	BP
GO:0016020	membrane	1.12e-25	305.286	190	2768	7.21e-12	503.473	411	2768	CC
GO:0016021	integral component of membrane	8.57e-24	172.716	76	1566	2.33e-12	284.841	199	1566	CC
GO:0016032	viral process	0.00492259	7.06381	1	64	6.5e-05	11.1744	1	64	BP
GO:0016055	Wnt signaling pathway	0.0453744	4.63563	1	42	0.0493101	7.33319	3	42	BP
GO:0016070	RNA metabolic process	5.46e-14	129.025	60	1169	2.5e-16	204.107	111	1169	BP
GO:0016407	acetyltransferase activity	0.0288277	6.75518	2	64	0.0327463	10.6766	5	64	MF
GO:0016410	N-acyltransferase activity	0.0313647	6.64963	2	63	0.0365615	10.5098	5	63	MF
GO:0016740	transferase activity	0.00331532	200.861	167	1903	0.00574107	317.461	279	1903	MF
GO:0016741	transferase activity, transferring one-carbon groups	2.93e-05	41.5866	19	394	2.8e-08	65.7277	29	394	MF
GO:0016758	transferase activity, transferring hexosyl groups	0.0104079	16.7824	8	159	0.00305679	26.5246	14	159	MF
GO:0016779	nucleotidyltransferase activity	2.96e-07	29.2373	7	277	8.57e-07	46.2096	19	277	MF
GO:0016788	hydrolase activity, acting on ester bonds	0.00851257	71.5627	53	678	4.46e-05	113.105	77	678	MF
GO:0016888	endodeoxyribonuclease activity, producing 5'-phosphomonoesters	0.00299504	5.48858	0	52	0.00085048	8.67472	1	52	MF
GO:0016891	endoribonuclease activity, producing 5'-phosphomonoesters	0.0179423	3.79979	0	36	0.00138971	6.00558	0	36	MF
GO:0016893	endonuclease activity, active with either ribo- or deoxyribonucleic acids and producing 5'-phosphomonoesters	5.3e-05	9.28837	0	88	1.89e-06	14.6803	1	88	MF
GO:0016987	bacterial sigma factor activity	0.0250932	3.48314	0	33	0.00240604	5.50511	0	33	MF
GO:0016998	cell wall macromolecule catabolic process	0.0116405	4.19414	0	38	0.000670688	6.6348	0	38	BP
GO:0018130	heterocycle biosynthetic process	2.05e-06	124.941	81	1132	1.24e-08	197.647	133	1132	BP
GO:0018142	protein-DNA covalent cross-linking	0.00575249	4.85637	0	44	0.000210949	7.68239	0	44	BP
GO:0018143	nucleic acid-protein covalent cross-linking	0.00575249	4.85637	0	44	0.000210949	7.68239	0	44	BP
GO:0019012	virion	3.3e-07	13.8967	0	126	7.24e-12	22.9182	0	126	CC
GO:0019028	viral capsid	3.73e-07	13.7864	0	125	8.9e-12	22.7363	0	125	CC
GO:0019058	viral life cycle	0.00124711	6.29121	0	57	1.72e-05	9.95219	0	57	BP
GO:0019068	virion assembly	0.0297722	3.31116	0	30	0.00313165	5.238	0	30	BP
GO:0019219	regulation of nucleobase-containing compound metabolic process	1.02e-16	79.0264	21	716	1.21e-22	125.014	40	716	BP
GO:0019222	regulation of metabolic process	3.64e-14	86.4213	30	783	8.86e-20	136.712	53	783	BP
GO:0019438	aromatic compound biosynthetic process	5.2e-07	123.065	77	1115	5.61e-09	194.679	129	1115	BP
GO:0019692	deoxyribose phosphate metabolic process	0.0165559	3.86302	0	35	0.010085	6.111	1	35	BP
GO:0023052	signaling	3.83e-08	130.791	79	1185	0.000194816	206.901	164	1185	BP
GO:0030001	metal ion transport	0.00127749	25.6063	12	232	0.0363063	40.5072	30	232	BP
GO:0030203	glycosaminoglycan metabolic process	0.00110864	6.40158	0	58	0.00124986	10.1268	2	58	BP
GO:0031224	intrinsic component of membrane	2.43e-23	172.826	77	1567	3.8e-12	285.023	200	1567	CC
GO:0031323	regulation of cellular metabolic process	3.3e-14	83.4413	28	756	3.36e-20	131.998	49	756	BP
GO:0031326	regulation of cellular biosynthetic process	3.01e-15	80.0197	24	725	1.65e-21	126.585	43	725	BP
GO:0032196	transposition	0.0376456	3.09042	0	28	0.00460246	4.8888	0	28	BP
GO:0032259	methylation	8.64e-08	22.7366	3	206	6.74e-12	35.9676	5	206	BP
GO:0032446	protein modification by small protein conjugation	0.0316182	6.62232	2	60	0.0366283	10.476	5	60	BP
GO:0032774	RNA biosynthetic process	2.05e-17	89.291	26	809	7.04e-23	141.251	50	809	BP
GO:0032870	cellular response to hormone stimulus	0.00744291	6.62232	1	60	0.00408236	10.476	3	60	BP
GO:0033554	cellular response to stress	0.000526024	29.8005	14	270	6.87e-06	47.142	22	270	BP
GO:0033993	response to lipid	0.00824876	6.51195	1	59	0.00106373	10.3014	2	59	BP
GO:0034061	DNA polymerase activity	7.76e-05	11.3994	1	108	2.76e-05	18.0167	4	108	MF
GO:0034062	5'-3' RNA polymerase activity	0.000671328	9.18282	1	87	0.00204989	14.5135	5	87	MF
GO:0034470	ncRNA processing	0.00106263	10.5957	2	96	7.75e-05	16.7616	4	96	BP
GO:0034641	cellular nitrogen compound metabolic process	1.59e-15	331.227	222	3001	1.48e-29	523.974	336	3001	BP
GO:0034645	cellular macromolecule biosynthetic process	7.84e-10	186.86	119	1693	5.47e-24	295.598	161	1693	BP
GO:0034654	nucleobase-containing compound biosynthetic process	2.22e-09	118.54	65	1074	1.36e-11	187.52	113	1074	BP
GO:0038023	signaling receptor activity	2.2e-17	54.7803	7	519	8.63e-18	86.5804	24	519	MF
GO:0042221	response to chemical	0.0222384	16.7766	9	152	0.000525103	26.5392	12	152	BP
GO:0042624	ATPase activity, uncoupled	0.00733246	4.64418	0	44	0.000321367	7.34015	0	44	MF
GO:0043169	cation binding	0.0199281	305.777	275	2897	4.3e-05	483.282	413	2897	MF
GO:0043170	macromolecule metabolic process	2e-16	452.415	330	4099	8.83e-31	715.685	507	4099	BP
GO:0043401	steroid hormone mediated signaling pathway	0.00824876	6.51195	1	59	0.00106373	10.3014	2	59	BP
GO:0043412	macromolecule modification	0.00294408	116.222	90	1053	0.00393788	183.854	153	1053	BP
GO:0043414	macromolecule methylation	6e-06	18.2114	3	165	6.84e-09	28.809	5	165	BP
GO:0043565	sequence-specific DNA binding	1.82e-09	35.148	7	333	1.01e-12	55.5516	14	333	MF
GO:0044036	cell wall macromolecule metabolic process	0.00575249	4.85637	0	44	0.000210949	7.68239	0	44	BP
GO:0044237	cellular metabolic process	0.0030034	481.443	439	4362	8.57e-09	761.605	657	4362	BP
GO:0044238	primary metabolic process	0.000617899	544.134	494	4930	8.23e-12	860.777	735	4930	BP
GO:0044249	cellular biosynthetic process	0.00193289	232.664	196	2108	1.23e-09	368.057	278	2108	BP
GO:0044260	cellular macromolecule metabolic process	1.2e-16	357.164	241	3236	1.09e-35	565.005	353	3236	BP
GO:0044403	symbiont process	0.00399828	7.28456	1	66	4.55e-05	11.5236	1	66	BP
GO:0044419	interspecies interaction between organisms	0.00139794	8.38828	1	76	6.41e-05	13.2696	2	76	BP
GO:0044423	virion part	3.3e-07	13.8967	0	126	7.24e-12	22.9182	0	126	CC
GO:0044425	membrane part	3.41e-11	190.142	123	1724	8.72e-06	313.58	258	1724	CC
GO:0044728	DNA methylation or demethylation	3.6e-07	13.9069	0	126	2.65e-11	21.9996	0	126	BP
GO:0046483	heterocycle metabolic process	3.98e-27	292.596	153	2651	2.14e-39	462.864	255	2651	BP
GO:0046872	metal ion binding	0.0178478	302.294	271	2864	2.78e-05	477.777	406	2864	MF
GO:0046914	transition metal ion binding	0.00177291	124.126	95	1176	0.000245796	196.182	154	1176	MF
GO:0046983	protein dimerization activity	0.0339956	17.3101	10	164	0.0443231	27.3587	19	164	MF
GO:0048545	response to steroid hormone	0.00824876	6.51195	1	59	0.00106373	10.3014	2	59	BP
GO:0050789	regulation of biological process	9.7e-12	229.795	148	2082	2.29e-10	363.517	270	2082	BP
GO:0050794	regulation of cellular process	3.71e-12	224.607	142	2035	6.96e-11	355.311	260	2035	BP
GO:0050896	response to stimulus	3.8e-07	179.244	124	1624	8.54e-07	283.55	218	1624	BP
GO:0051171	regulation of nitrogen compound metabolic process	5.54e-14	82.779	28	750	7.01e-21	130.95	47	750	BP
GO:0051252	regulation of RNA metabolic process	2.09e-16	76.4878	20	693	2.41e-22	120.998	38	693	BP
GO:0051704	multi-organism process	0.00419731	10.7061	3	97	6.65e-05	16.9362	4	97	BP
GO:0051716	cellular response to stimulus	2.9e-11	157.832	90	1430	8.19e-08	249.678	182	1430	BP
GO:0051726	regulation of cell cycle	0.00319597	5.40823	0	49	8.04e-05	8.55539	0	49	BP
GO:0055085	transmembrane transport	9.29e-07	74.17	39	672	0.00127574	117.331	89	672	BP
GO:0060089	molecular transducer activity	1.98e-17	54.8858	7	520	7.49e-18	86.7472	24	520	MF
GO:0060255	regulation of macromolecule metabolic process	3.33e-14	84.9865	29	770	1.61e-20	134.442	50	770	BP
GO:0061783	peptidoglycan muralytic activity	0.0414855	4.74973	1	45	0.000267599	7.50697	0	45	MF
GO:0065007	biological regulation	4.71e-08	238.845	172	2164	1.34e-07	377.834	299	2164	BP
GO:0070887	cellular response to chemical stimulus	0.0155136	9.05051	3	82	0.00228242	14.3172	5	82	BP
GO:0071310	cellular response to organic substance	0.00502038	8.82977	2	80	0.00085218	13.968	4	80	BP
GO:0071383	cellular response to steroid hormone stimulus	0.00824876	6.51195	1	59	0.00106373	10.3014	2	59	BP
GO:0071396	cellular response to lipid	0.00824876	6.51195	1	59	0.00106373	10.3014	2	59	BP
GO:0071407	cellular response to organic cyclic compound	0.0316182	6.62232	2	60	0.00408236	10.476	3	60	BP
GO:0071495	cellular response to endogenous stimulus	0.00172725	8.16753	1	74	0.000493541	12.9204	3	74	BP
GO:0071554	cell wall organization or biogenesis	0.00454749	5.07711	0	46	0.000143434	8.03159	0	46	BP
GO:0071704	organic substance metabolic process	0.00715937	569.078	531	5156	4.72e-09	900.237	793	5156	BP
GO:0080090	regulation of primary metabolic process	2.54e-14	83.7724	28	759	2.23e-20	132.521	49	759	BP
GO:0090304	nucleic acid metabolic process	9.64e-47	245.467	78	2224	6.84e-64	388.31	145	2224	BP
GO:0097159	organic cyclic compound binding	0.0452496	484.79	455	4593	0.000254772	766.211	693	4593	MF
GO:0097659	nucleic acid-templated transcription	3.58e-17	88.6288	26	803	1.64e-22	140.204	50	803	BP
GO:0097747	RNA polymerase activity	0.000671328	9.18282	1	87	0.00204989	14.5135	5	87	MF
GO:0140097	catalytic activity, acting on DNA	7.9e-13	47.7084	9	452	1.42e-15	75.4033	21	452	MF
GO:0140098	catalytic activity, acting on RNA	0.0349428	34.0925	24	323	0.000166872	53.8834	31	323	MF
GO:0140110	transcription regulator activity	3.08e-07	39.2645	13	372	1.98e-11	62.0576	20	372	MF
GO:0198738	cell-cell signaling by wnt	0.0453744	4.63563	1	42	0.0493101	7.33319	3	42	BP
GO:1901136	carbohydrate derivative catabolic process	0.014252	9.16088	3	83	0.00599211	14.4918	6	83	BP
GO:1901360	organic cyclic compound metabolic process	9.95e-26	295.466	159	2677	1.98e-37	467.404	264	2677	BP
GO:1901362	organic cyclic compound biosynthetic process	2.98e-06	126.486	83	1146	2e-08	200.091	136	1146	BP
GO:1901363	heterocyclic compound binding	0.0470008	484.473	455	4590	0.000277989	765.711	693	4590	MF
GO:1901576	organic substance biosynthetic process	0.00265898	236.638	201	2144	3.18e-09	374.342	286	2144	BP
GO:1903506	regulation of nucleic acid-templated transcription	5.6e-17	76.2671	19	691	8.26e-23	120.649	37	691	BP
GO:1905114	cell surface receptor signaling pathway involved in cell-cell signaling	0.0453744	4.63563	1	42	0.0493101	7.33319	3	42	BP
GO:2000112	regulation of cellular macromolecule biosynthetic process	3.3e-15	79.9094	24	724	1.9e-21	126.41	43	724	BP
GO:2001141	regulation of RNA biosynthetic process	5.6e-17	76.2671	19	691	8.26e-23	120.649	37	691	BP
