# Supplementary material for: Combined transcriptome and proteome profiling reveals specific molecular brain signatures for sex, maturation and circalunar clock phase
Source: eLife. 2019 Feb 15;8:e41556. doi: 10.7554/eLife.41556 (PMC6377233; doi:10.7554/eLife.41556)
Supplement: Figure 5—source data 6. — This file contains the ROTS predicted DEPs for all 14 comparision made. Each comparison is contained within a separate tab. [file elife-41556-fig5-data6.xlsx]

## Sheet: IM_NM vs PM_NM_Female
	d	logFC	pvalue	FDR	Z	R
comp1194290_c0_seq1_m.781	-1.72668	-0.66911	0.0108336	0	5.31844	0.83593
comp1197507_c0_seq1_m.1032	-2.03033	-0.526696	0.00586466	0	5.31844	0.83593
comp1244797_c0_seq1_m.1278	1.87543	0.43637	0.00821053	0	5.31844	0.83593
comp1326513_c0_seq1_m.1923	-2.36059	-0.683397	0.00261654	0	5.31844	0.83593
comp1876805_c0_seq1_m.2339	1.69993	0.431416	0.0114652	0	5.31844	0.83593
comp1910314_c0_seq1_m.2848	-2.1877	-0.671671	0.00406015	0	5.31844	0.83593
comp1916779_c0_seq1_m.2944	-1.75255	-0.46636	0.0102021	0	5.31844	0.83593
comp1953077_c0_seq1_m.3483	-1.71661	-0.586323	0.0111945	0	5.31844	0.83593
comp1953876_c0_seq1_m.3493	2.23601	0.679434	0.00369925	0	5.31844	0.83593
comp1958245_c0_seq1_m.3536	-2.05993	-0.481185	0.00541353	0	5.31844	0.83593
comp1977957_c0_seq1_m.3878	1.64761	0.530311	0.0122773	0	5.31844	0.83593
comp2138952_c0_seq1_m.6867	1.88835	0.614169	0.0081203	0	5.31844	0.83593
comp2141229_c0_seq1_m.7283	-1.99571	-0.543419	0.00631579	0	5.31844	0.83593
comp2141997_c0_seq1_m.7386	2.00705	1.20979	0.00613534	0	5.31844	0.83593
comp2143334_c0_seq2_m.7649	2.04428	0.613897	0.00568421	0	5.31844	0.83593
comp2189372_c0_seq1_m.11219	-3.32053	-0.772839	0.000270677	0	5.31844	0.83593
comp2203251_c0_seq1_m.13504	1.93132	0.474889	0.00730827	0	5.31844	0.83593
comp2204754_c0_seq1_m.13720	1.97117	0.598812	0.00667669	0	5.31844	0.83593
comp2208474_c0_seq1_m.14351	-2.60776	-0.770375	0.00171429	0	5.31844	0.83593
comp2223962_c0_seq7_m.19686	-2.16916	-0.671286	0.00433083	0	5.31844	0.83593
comp2224448_c0_seq1_m.19874	-1.94221	-0.493849	0.00712782	0	5.31844	0.83593
comp2225664_c0_seq1_m.20382	1.83107	0.442507	0.00866165	0	5.31844	0.83593
comp2226643_c0_seq1_m.20830	-2.05315	-0.557403	0.00550376	0	5.31844	0.83593
comp2229729_c0_seq1_m.22264	2.84657	0.99382	0.00117293	0	5.31844	0.83593
comp2233700_c1_seq1_m.24550	1.79695	0.808941	0.00938346	0	5.31844	0.83593
comp2237468_c0_seq1_m.27022	-3.92823	-1.55238	9.02256e-05	0	5.31844	0.83593
comp2238188_c0_seq1_m.27576	-1.87471	-0.647406	0.00830075	0	5.31844	0.83593
comp2243933_c0_seq1_m.32211	-1.60227	-0.502477	0.0134568	0	5.31844	0.83593
comp2244716_c0_seq1_m.32883	1.72541	0.510261	0.0109239	0	5.31844	0.83593
comp2245014_c0_seq2_m.33157	-2.54272	-0.805487	0.00198496	0	5.31844	0.83593
comp2247988_c0_seq1_m.36173	-2.40138	-0.677263	0.00252632	0	5.31844	0.83593
comp2248821_c1_seq2_m.37050	-1.73055	-0.407693	0.010563	0	5.31844	0.83593
comp2249227_c0_seq1_m.37479	-1.60715	-0.392612	0.0132763	0	5.31844	0.83593
comp2251386_c0_seq2_m.40044	-1.56955	-0.461926	0.0146344	0	5.31844	0.83593
comp2252186_c0_seq3_m.40915	-1.55863	-0.571439	0.0151729	0	5.31844	0.83593
comp2252285_c0_seq2_m.41107	-1.88891	-0.458441	0.00803008	0	5.31844	0.83593
comp2252746_c0_seq1_m.41651	-1.7694	-0.47499	0.010015	0	5.31844	0.83593
comp2252847_c0_seq1_m.41763	1.91551	0.462154	0.00766917	0	5.31844	0.83593
comp2253217_c0_seq2_m.42336	-2.26523	-0.61439	0.00315789	0	5.31844	0.83593
comp2253856_c0_seq1_m.43254	-2.31929	-0.627201	0.00288722	0	5.31844	0.83593
comp2253875_c0_seq1_m.43271	1.66795	0.484131	0.0120066	0	5.31844	0.83593
comp2254346_c0_seq1_m.43876	1.78306	0.848956	0.00965414	0	5.31844	0.83593
comp2254520_c0_seq1_m.44059	-1.61221	-0.51973	0.0131861	0	5.31844	0.83593
comp2254641_c1_seq1_m.44200	-1.9618	-0.500821	0.00676692	0	5.31844	0.83593
comp2256041_c0_seq1_m.46046	2.51165	0.62142	0.00216541	0	5.31844	0.83593
comp2257070_c0_seq2_m.47512	1.96092	0.772047	0.00685714	0	5.31844	0.83593
comp2257395_c0_seq4_m.47951	2.96921	1.44216	0.000902256	0	5.31844	0.83593
comp2257585_c0_seq1_m.48216	2.3267	0.73009	0.00279699	0	5.31844	0.83593
comp2257633_c0_seq1_m.48279	-1.6781	-0.456418	0.0117359	0	5.31844	0.83593
comp2257674_c0_seq1_m.48339	2.49273	1.36341	0.00225564	0	5.31844	0.83593
comp2257781_c0_seq1_m.48513	1.5737	0.405295	0.0145442	0	5.31844	0.83593
comp2257905_c0_seq1_m.48664	-3.16872	-0.878192	0.000541353	0	5.31844	0.83593
comp2257939_c0_seq1_m.48703	-2.60713	-0.778067	0.00180451	0	5.31844	0.83593
comp2258609_c0_seq1_m.49647	1.75079	0.43258	0.0102923	0	5.31844	0.83593
comp2259221_c0_seq1_m.50687	1.90746	0.465678	0.0077594	0	5.31844	0.83593
comp2260394_c0_seq1_m.52394	-1.78068	-0.460634	0.00974436	0	5.31844	0.83593
comp2260960_c0_seq2_m.53456	1.83267	0.821985	0.00857143	0	5.31844	0.83593
comp2261183_c0_seq1_m.53867	1.55969	0.500829	0.0150827	0	5.31844	0.83593
comp2261379_c0_seq1_m.54133	-1.66038	-0.517012	0.012187	0	5.31844	0.83593
comp2261716_c0_seq2_m.54597	2.16455	0.524463	0.00442105	0	5.31844	0.83593
comp2261876_c0_seq1_m.54865	1.63451	0.653552	0.0128252	0	5.31844	0.83593
comp2262731_c0_seq1_m.56213	2.12861	0.702604	0.00478195	0	5.31844	0.83593
comp2263115_c0_seq2_m.56831	2.53628	0.789003	0.00207519	0	5.31844	0.83593
comp2263394_c0_seq1_m.57263	1.58826	0.528392	0.0140883	0	5.31844	0.83593
comp2263508_c0_seq1_m.57408	1.61546	0.564676	0.0130959	0	5.31844	0.83593
comp2263612_c1_seq1_m.57550	-1.58373	-0.33212	0.0141786	0	5.31844	0.83593
comp2263921_c0_seq2_m.58101	2.24121	0.56287	0.00342857	0	5.31844	0.83593
comp2264302_c0_seq2_m.58699	-1.83906	-0.616009	0.0084812	0	5.31844	0.83593
comp2264838_c0_seq3_m.59436	-3.13724	-1.41163	0.000631579	0	5.31844	0.83593
comp2264888_c0_seq4_m.59493	1.6607	0.686753	0.0120968	0	5.31844	0.83593
comp2265049_c0_seq3_m.59764	1.82696	0.674567	0.00875188	0	5.31844	0.83593
comp2265656_c0_seq3_m.60780	1.93423	0.826902	0.00721805	0	5.31844	0.83593
comp2265768_c0_seq2_m.60943	-2.09895	-0.721138	0.00505263	0	5.31844	0.83593
comp2265883_c1_seq1_m.61140	1.597	0.610993	0.0137274	0	5.31844	0.83593
comp2266233_c0_seq1_m.61658	1.70725	0.725596	0.011375	0	5.31844	0.83593
comp2266507_c0_seq10_m.62138	-1.80169	-0.551171	0.00911278	0	5.31844	0.83593
comp2266692_c0_seq1_m.62504	2.17988	0.64228	0.0042406	0	5.31844	0.83593
comp2266841_c0_seq1_m.62766	2.21469	0.677871	0.0038797	0	5.31844	0.83593
comp2267172_c0_seq1_m.63318	2.28183	0.640926	0.00306767	0	5.31844	0.83593
comp2267571_c0_seq4_m.64058	-2.23923	-0.68754	0.00360902	0	5.31844	0.83593
comp2267634_c0_seq2_m.64174	-1.6307	-0.479343	0.0129154	0	5.31844	0.83593
comp2267732_c0_seq2_m.64331	-2.87937	-0.71106	0.000992481	0	5.31844	0.83593
comp2268115_c0_seq2_m.65034	-2.64722	-0.680709	0.00153383	0	5.31844	0.83593
comp2268194_c0_seq1_m.65186	-1.56923	-0.451499	0.0147246	0	5.31844	0.83593
comp2268340_c1_seq1_m.65478	2.24677	0.613826	0.00324812	0	5.31844	0.83593
comp2268473_c1_seq1_m.65668	1.72127	0.69682	0.0110141	0	5.31844	0.83593
comp2268798_c0_seq2_m.66233	1.98315	0.599646	0.00649624	0	5.31844	0.83593
comp2268869_c0_seq6_m.66344	2.13533	0.891019	0.00469173	0	5.31844	0.83593
comp2269009_c0_seq1_m.66627	-1.97598	-0.566074	0.00658647	0	5.31844	0.83593
comp2269158_c0_seq1_m.66914	1.8173	0.421748	0.00884211	0	5.31844	0.83593
comp2269185_c0_seq2_m.66963	-1.95743	-0.525933	0.00694737	0	5.31844	0.83593
comp2269201_c0_seq1_m.67004	-1.8103	-0.886393	0.00902256	0	5.31844	0.83593
comp2269321_c1_seq1_m.67212	-2.86097	-0.789511	0.00108271	0	5.31844	0.83593
comp2269611_c0_seq1_m.67728	1.78606	0.48214	0.00947368	0	5.31844	0.83593
comp2269814_c0_seq1_m.68069	1.74882	0.460441	0.0103825	0	5.31844	0.83593
comp2269850_c0_seq1_m.68122	1.78476	0.548416	0.00956391	0	5.31844	0.83593
comp2269987_c0_seq2_m.68354	2.63905	0.765614	0.00162406	0	5.31844	0.83593
comp2270220_c0_seq1_m.68776	1.71208	0.498818	0.0112848	0	5.31844	0.83593
comp2270279_c0_seq7_m.68904	-2.71865	-0.602302	0.00135338	0	5.31844	0.83593
comp2270404_c0_seq3_m.69137	-2.48983	-0.781969	0.00234586	0	5.31844	0.83593
comp2270576_c0_seq1_m.69463	2.21251	0.775273	0.00396992	0	5.31844	0.83593
comp2270876_c0_seq2_m.70018	-2.03428	-0.535775	0.00577444	0	5.31844	0.83593
comp2271567_c0_seq1_m.71391	1.81289	0.549803	0.00893233	0	5.31844	0.83593
comp2271595_c0_seq2_m.71452	1.55802	0.430868	0.0152632	0	5.31844	0.83593
comp2271675_c0_seq2_m.71655	2.33526	1.07753	0.00270677	0	5.31844	0.83593
comp2271737_c1_seq2_m.71770	-2.12768	-0.681161	0.00487218	0	5.31844	0.83593
comp2271871_c0_seq8_m.72023	1.63848	0.47179	0.012735	0	5.31844	0.83593
comp2271916_c0_seq1_m.72122	1.62841	0.442568	0.0130056	0	5.31844	0.83593
comp2272118_c0_seq11_m.72524	1.58087	0.523247	0.0142688	0	5.31844	0.83593
comp2272254_c0_seq4_m.72822	-1.63959	-0.607371	0.0126447	0	5.31844	0.83593
comp2272435_c0_seq2_m.73201	1.5917	0.784025	0.0139981	0	5.31844	0.83593
comp2272547_c0_seq4_m.73421	-1.72737	-0.435062	0.0106532	0	5.31844	0.83593
comp2272691_c0_seq4_m.73750	1.91955	0.924877	0.0073985	0	5.31844	0.83593
comp2272782_c0_seq2_m.73955	-1.90473	-0.564158	0.00784962	0	5.31844	0.83593
comp2273141_c0_seq2_m.74737	1.64561	0.328819	0.0124577	0	5.31844	0.83593
comp2273417_c0_seq5_m.75297	-1.59491	-0.524242	0.0138177	0	5.31844	0.83593
comp2273926_c0_seq5_m.76421	3.64583	1.32591	0.000180451	0	5.31844	0.83593
comp2274106_c1_seq2_m.76871	3.04403	0.828748	0.00081203	0	5.31844	0.83593
comp2274278_c0_seq6_m.77267	-2.22667	-0.617688	0.00378947	0	5.31844	0.83593
comp2274295_c0_seq2_m.77311	1.71953	0.613698	0.0111043	0	5.31844	0.83593
comp2274301_c0_seq6_m.77327	1.76978	0.604801	0.00992481	0	5.31844	0.83593
comp2274474_c0_seq5_m.77718	-1.80016	-0.666004	0.00920301	0	5.31844	0.83593
comp2274693_c0_seq1_m.78142	1.77148	0.497536	0.00983459	0	5.31844	0.83593
comp2274909_c0_seq7_m.78613	1.91656	1.40528	0.00757895	0	5.31844	0.83593
comp2274909_c0_seq7_m.78615	2.15324	1.49062	0.00451128	0	5.31844	0.83593
comp2274999_c0_seq4_m.78837	1.59261	0.456298	0.0139079	0	5.31844	0.83593
comp2275391_c0_seq1_m.79711	-1.89513	-0.633078	0.00793985	0	5.31844	0.83593
comp2275523_c0_seq29_m.80039	2.0099	0.6953	0.00595489	0	5.31844	0.83593
comp2275674_c1_seq1_m.80370	-1.55093	-0.652428	0.0154436	0	5.31844	0.83593
comp2275701_c1_seq1_m.80440	2.29022	0.876985	0.00297744	0	5.31844	0.83593
comp2275841_c0_seq1_m.80783	-2.69945	-0.76456	0.00144361	0	5.31844	0.83593
comp2275893_c0_seq1_m.80933	-1.7438	-0.715093	0.0104727	0	5.31844	0.83593
comp2276035_c1_seq16_m.81307	-2.04866	-0.555699	0.00559398	0	5.31844	0.83593
comp2276151_c0_seq3_m.81648	1.94859	0.509176	0.00703759	0	5.31844	0.83593
comp2276440_c0_seq2_m.82383	1.60363	0.417744	0.0133665	0	5.31844	0.83593
comp2276528_c1_seq4_m.82615	1.56091	0.932363	0.0149925	0	5.31844	0.83593
comp2276577_c0_seq8_m.92288	2.08535	0.935228	0.00523308	0	5.31844	0.83593
comp2276668_c0_seq1_m.83017	-1.64593	-0.536286	0.0123675	0	5.31844	0.83593
comp2276805_c0_seq8_m.83380	1.72668	0.61878	0.0107434	0	5.31844	0.83593
comp2277114_c1_seq1_m.84278	2.2402	0.849284	0.0035188	0	5.31844	0.83593
comp2277374_c0_seq2_m.85051	2.00776	0.740439	0.00604511	0	5.31844	0.83593
comp2277416_c0_seq3_m.85174	2.18085	0.626203	0.00415038	0	5.31844	0.83593
comp2277605_c1_seq7_m.85828	1.60067	0.450577	0.013547	0	5.31844	0.83593
comp2277908_c1_seq11_m.86865	1.79829	0.44598	0.00929323	0	5.31844	0.83593
comp2277947_c0_seq1_m.86990	-2.06603	-0.523888	0.00532331	0	5.31844	0.83593
comp2278010_c1_seq9_m.87231	-1.99628	-0.680017	0.00622556	0	5.31844	0.83593
comp2278077_c0_seq3_m.87468	2.243	0.629524	0.00333835	0	5.31844	0.83593
comp2278474_c0_seq1_m.89294	-1.55422	-0.386457	0.0153534	0	5.31844	0.83593
comp2278480_c0_seq4_m.89330	1.91683	0.568285	0.00748872	0	5.31844	0.83593
comp2278480_c1_seq1_m.89333	1.59992	0.375389	0.0136372	0	5.31844	0.83593
comp2279536_c0_seq1_m.91140	-1.67007	-0.44665	0.0119164	0	5.31844	0.83593
comp2279567_c0_seq1_m.91146	2.13791	0.65908	0.0046015	0	5.31844	0.83593
comp2280178_c0_seq1_m.91219	-1.6956	-0.520687	0.0115555	0	5.31844	0.83593
comp2281676_c0_seq1_m.91255	1.68582	0.559673	0.0116457	0	5.31844	0.83593
comp2287273_c0_seq1_contamination_m.91384	1.98558	0.429398	0.00640602	0	5.31844	0.83593
comp2347711_c0_seq1_contamination_m.91628	-2.42089	-0.769431	0.00243609	0	5.31844	0.83593
gnl_Pdu_trscr_assembly_1_11607_m.26425	1.67681	0.560593	0.0118261	0	5.31844	0.83593
gnl_Pdu_trscr_assembly_1_12794_m.61443	2.6022	0.92225	0.00189474	0	5.31844	0.83593
gnl_Pdu_trscr_assembly_1_14638_m.60097	-2.83859	-0.846809	0.00126316	0	5.31844	0.83593
gnl_Pdu_trscr_assembly_1_1514_m.69841	2.11746	0.790495	0.00496241	0	5.31844	0.83593
gnl_Pdu_trscr_assembly_1_15590_m.29311	2.09627	1.35316	0.00514286	0	5.31844	0.83593
gnl_Pdu_trscr_assembly_1_16296_m.13041	-3.22494	-0.863811	0.000360902	0	5.31844	0.83593
gnl_Pdu_trscr_assembly_1_200732_m.91055	-1.84085	-0.66314	0.00839098	0	5.31844	0.83593
gnl_Pdu_trscr_assembly_1_2589_m.58494	-1.56626	-0.454885	0.0148148	0	5.31844	0.83593
gnl_Pdu_trscr_assembly_1_7327_m.81715	-3.0963	-0.761912	0.000721805	0	5.31844	0.83593
gnl_Pdu_trscr_assembly_1_998_m.15062	-3.192	-0.783578	0.000451128	0	5.31844	0.83593
comp2277945_c0_seq2_m.86985	1.45077	0.56567	0.0200883	0.00483092	5.31844	0.83593
comp2268978_c0_seq1_m.66540	1.46117	0.841522	0.0199981	0.00485437	5.31844	0.83593
comp2273778_c1_seq23_m.76059	1.46302	0.577812	0.019719	0.00487805	5.31844	0.83593
comp2279340_c0_seq1_m.91103	1.46469	0.771275	0.0196288	0.00490196	5.31844	0.83593
comp2275714_c2_seq1_m.80469	-1.46493	-0.45036	0.0195385	0.00492611	5.31844	0.83593
comp2273765_c1_seq6_m.76032	1.47007	0.725537	0.0194483	0.0049505	5.31844	0.83593
comp2272842_c0_seq2_m.74081	-1.47392	-0.587554	0.0193581	0.00497512	5.31844	0.83593
comp1196959_c0_seq2_m.1014	1.47964	0.412267	0.0192679	0.005	5.31844	0.83593
comp2260649_c0_seq2_m.52797	1.47973	0.466571	0.0191776	0.00502513	5.31844	0.83593
comp2276389_c1_seq15_m.82250	-1.48313	-0.336089	0.0190874	0.00505051	5.31844	0.83593
comp2271225_c0_seq5_m.70641	-1.48597	-0.529512	0.0189972	0.00507614	5.31844	0.83593
comp2275625_c0_seq11_m.80264	-1.48619	-0.593263	0.018907	0.00510204	5.31844	0.83593
comp2246514_c1_seq1_m.34691	-1.48835	-0.382118	0.0187274	0.00512821	5.31844	0.83593
gi_613484551	1.49224	0.552314	0.0186372	0.00515464	5.31844	0.83593
comp2275853_c0_seq1_m.80817	1.49598	0.450501	0.0184492	0.00518135	5.31844	0.83593
comp2222959_c0_seq1_m.19328	-1.4998	-0.634944	0.018359	0.00520833	5.31844	0.83593
comp2278509_c0_seq8_m.89637	1.50022	0.363553	0.0182688	0.0052356	5.31844	0.83593
comp2260103_c0_seq1_m.51994	-1.50179	-0.368878	0.0181786	0.00526316	5.31844	0.83593
comp2259363_c0_seq16_m.50888	1.50297	0.345307	0.0179013	0.00529101	5.31844	0.83593
comp2275241_c0_seq5_m.79383	1.50854	0.337931	0.0178111	0.00531915	5.31844	0.83593
gnl_Pdu_trscr_assembly_1_14069_m.67140	-1.5119	-0.371878	0.0177209	0.00534759	5.31844	0.83593
comp2254675_c0_seq1_m.44244	-1.5124	-0.383451	0.0176306	0.00537634	5.31844	0.83593
comp2251806_c0_seq1_m.40480	-1.51829	-0.332987	0.0174483	0.00540541	5.31844	0.83593
comp2272437_c1_seq1_m.73204	-1.52124	-0.547642	0.0173581	0.00543478	5.31844	0.83593
comp2263346_c1_seq31_m.57192	-1.52191	-0.399741	0.0172679	0.00546448	5.31844	0.83593
comp2276314_c0_seq1_m.82075	1.52302	0.547693	0.0171776	0.00549451	5.31844	0.83593
gnl_Pdu_trscr_assembly_1_3867_m.65412	1.52308	1.27649	0.0170874	0.00552486	5.31844	0.83593
comp2204672_c0_seq1_m.13711	-1.52521	-0.338992	0.0169972	0.00555556	5.31844	0.83593
comp2276593_c0_seq3_m.82791	1.52938	0.390997	0.0168214	0.00558659	5.31844	0.83593
gnl_Pdu_trscr_assembly_1_16061_m.43221	-1.53283	-0.424979	0.0167312	0.00561798	5.31844	0.83593
comp2261362_c0_seq2_m.54116	1.53491	0.747715	0.016641	0.00564972	5.31844	0.83593
comp2236992_c0_seq1_m.26663	-1.53676	-0.380975	0.0165508	0.00568182	5.31844	0.83593
comp2273519_c1_seq9_m.75533	1.53686	0.58569	0.0164605	0.00571429	5.31844	0.83593
comp2261395_c0_seq1_m.54150	1.53844	0.600272	0.0163703	0.00574713	5.31844	0.83593
comp2275445_c0_seq2_m.79869	-1.53927	-0.403622	0.0162801	0.00578035	5.31844	0.83593
comp2268937_c0_seq1_m.66472	1.54013	0.492445	0.0161898	0.00581395	5.31844	0.83593
comp2275933_c0_seq1_m.81045	1.5415	0.572403	0.0160996	0.00584795	5.31844	0.83593
comp2271413_c1_seq5_m.70995	-1.54275	-0.411079	0.0160094	0.00588235	5.31844	0.83593
gnl_Pdu_trscr_assembly_1_7274_m.39240	1.54446	0.860085	0.0159192	0.00591716	5.31844	0.83593
comp2254456_c0_seq2_m.43993	1.54545	0.383059	0.0158289	0.00595238	5.31844	0.83593
comp2278366_c0_seq5_m.88731	-1.54777	-0.35252	0.0157387	0.00598802	5.31844	0.83593
comp2265370_c0_seq1_m.60276	-1.37579	-0.280575	0.0234117	0.00865801	5.31844	0.83593
comp2263822_c0_seq1_m.57945	1.37908	0.304537	0.0233214	0.00869565	5.31844	0.83593
comp2279523_c0_seq1_m.91136	-1.3799	-0.380542	0.0232312	0.00873362	5.31844	0.83593
comp2269698_c0_seq1_m.67864	1.38401	0.366765	0.0230517	0.00877193	5.31844	0.83593
comp2275107_c0_seq4_m.79080	-1.38415	-0.336295	0.0229615	0.00881057	5.31844	0.83593
comp2257070_c0_seq2_m.47513	1.39187	0.409801	0.0226823	0.00884956	5.31844	0.83593
comp2235681_c0_seq1_m.25791	-1.39286	-0.417842	0.0225921	0.00888889	5.31844	0.83593
comp2275478_c0_seq7_m.79935	1.3946	0.380294	0.0225019	0.00892857	5.31844	0.83593
gnl_Pdu_trscr_assembly_1_1986_m.5698	-1.40336	-0.455496	0.0224117	0.00896861	5.31844	0.83593
comp1198575_c0_seq1_m.1066	-1.40742	-0.365851	0.0223214	0.00900901	5.31844	0.83593
comp2248808_c0_seq2_m.37043	-1.40973	-0.736594	0.0222312	0.00904977	5.31844	0.83593
comp2250982_c0_seq1_m.39507	1.40979	0.330945	0.022141	0.00909091	5.31844	0.83593
comp2265471_c0_seq5_m.60488	1.41269	0.376593	0.0220508	0.00913242	5.31844	0.83593
comp2224014_c0_seq1_m.19704	-1.41922	-0.353709	0.0219605	0.00917431	5.31844	0.83593
comp2254167_c0_seq1_m.43587	1.42366	0.34258	0.0217782	0.00921659	5.31844	0.83593
comp2271667_c0_seq1_m.71637	1.42661	0.309964	0.021688	0.00925926	5.31844	0.83593
comp2275191_c1_seq2_m.79282	1.4301	0.418359	0.0215977	0.00930233	5.31844	0.83593
comp2278471_c0_seq8_m.89279	1.43091	0.352574	0.0215075	0.00934579	5.31844	0.83593
comp2276160_c0_seq4_m.81678	-1.43578	-0.448257	0.0210244	0.00938967	5.31844	0.83593
comp2268443_c0_seq2_m.65634	1.43816	0.345238	0.0208289	0.00943396	5.31844	0.83593
comp2278623_c0_seq6_m.90693	1.44003	0.431246	0.0207387	0.00947867	5.31844	0.83593
comp2274581_c1_seq21_m.92631	-1.44717	-0.370311	0.0205432	0.00952381	5.31844	0.83593
comp2277313_c0_seq3_m.84866	1.44726	0.497523	0.020453	0.00956938	5.31844	0.83593
comp2271594_c0_seq8_m.71451	-1.44811	-0.582485	0.020266	0.00961538	5.31844	0.83593
comp2270385_c0_seq11_m.69105	1.32591	0.448683	0.0261617	0.0119048	5.31844	0.83593
comp2276743_c1_seq1_m.83170	1.32856	0.32854	0.0259821	0.0119522	5.31844	0.83593
comp2275191_c0_seq1_m.79281	1.33433	0.335075	0.0256964	0.012	5.31844	0.83593
gnl_Pdu_trscr_assembly_1_200732_m.91056	-1.33967	-0.505421	0.0255009	0.0120482	5.31844	0.83593
comp2254394_c0_seq2_m.43926	-1.34012	-0.347517	0.0254107	0.0120968	5.31844	0.83593
comp2276426_c0_seq2_m.82339	-1.34114	-0.386353	0.0253205	0.0121457	5.31844	0.83593
comp2254426_c0_seq1_m.43954	-1.34159	-0.419835	0.0252303	0.0121951	5.31844	0.83593
comp2275822_c0_seq10_m.80745	-1.34228	-0.396551	0.02514	0.0122449	5.31844	0.83593
comp2250201_c0_seq1_m.38525	1.34596	0.32496	0.0250498	0.0122951	5.31844	0.83593
comp2261018_c0_seq2_m.53614	-1.34717	-0.345134	0.0249596	0.0123457	5.31844	0.83593
comp2242282_c0_seq1_m.30761	-1.34805	-0.362767	0.0248694	0.0123967	5.31844	0.83593
comp2269593_c0_seq3_m.67692	1.34832	0.32061	0.0247791	0.0124481	5.31844	0.83593
comp2276825_c0_seq1_m.83424	1.35083	0.374819	0.0246889	0.0125	5.31844	0.83593
comp1194106_c0_seq1_m.742	1.35087	0.333326	0.0245987	0.0125523	5.31844	0.83593
comp2273257_c0_seq9_m.74986	1.35313	0.522259	0.0244117	0.012605	5.31844	0.83593
comp2272882_c0_seq14_m.74184	-1.35325	-0.528962	0.0243214	0.0126582	5.31844	0.83593
comp2273356_c0_seq1_m.75157	1.35783	0.296904	0.0240423	0.0127119	5.31844	0.83593
comp2278306_c0_seq2_m.88465	1.36384	0.318821	0.02386	0.012766	5.31844	0.83593
comp2278536_c1_seq38_m.89884	1.36517	0.40627	0.0237697	0.0128205	5.31844	0.83593
comp2269627_c0_seq2_m.67749	1.37224	0.414678	0.0236795	0.0128755	5.31844	0.83593
comp2278133_c0_seq3_m.87701	1.37269	0.35072	0.0235893	0.012931	5.31844	0.83593
comp2263250_c0_seq1_m.57052	-1.25059	-0.354823	0.0303421	0.0142349	5.31844	0.83593
comp2275616_c0_seq2_m.80253	1.25325	0.381696	0.0302519	0.0142857	5.31844	0.83593
comp2271637_c0_seq1_m.71562	1.25822	0.406609	0.0301617	0.0143369	5.31844	0.83593
comp2244437_c0_seq1_m.32653	-1.25937	-0.346985	0.0300714	0.0143885	5.31844	0.83593
comp2277142_c0_seq6_m.84365	1.25971	0.490715	0.0299812	0.0144404	5.31844	0.83593
comp2274043_c0_seq7_m.76739	-1.26074	-0.408383	0.029891	0.0144928	5.31844	0.83593
comp2277134_c1_seq4_m.84342	1.26232	0.303011	0.0298008	0.0145455	5.31844	0.83593
comp2252318_c0_seq1_m.41154	-1.2664	-0.337484	0.029625	0.0145985	5.31844	0.83593
comp2276804_c0_seq1_m.83376	-1.27123	-0.499595	0.0291673	0.014652	5.31844	0.83593
comp2270996_c0_seq5_m.70236	1.27256	0.50302	0.0290771	0.0147059	5.31844	0.83593
comp2262360_c0_seq1_m.55644	-1.27534	-0.575185	0.02889	0.0147601	5.31844	0.83593
comp2280482_c0_seq1_m.91228	-1.2761	-0.372381	0.028703	0.0148148	5.31844	0.83593
comp2278333_c0_seq10_m.88591	-1.27757	-0.353829	0.0286128	0.0148699	5.31844	0.83593
comp2278630_c0_seq8_m.90809	-1.28065	-0.333714	0.0285226	0.0149254	5.31844	0.83593
comp2277995_c0_seq1_m.87177	1.29196	0.445854	0.028344	0.0149813	5.31844	0.83593
comp2277759_c0_seq3_m.86312	1.29477	0.357103	0.0282538	0.0150376	5.31844	0.83593
comp2277680_c0_seq25_m.86056	-1.29531	-0.31214	0.0281635	0.0150943	5.31844	0.83593
comp2271944_c0_seq11_m.72172	1.29848	0.441031	0.0280733	0.0151515	5.31844	0.83593
comp2274961_c0_seq5_m.78739	-1.29965	-0.357974	0.0279831	0.0152091	5.31844	0.83593
comp1926910_c0_seq1_m.3122	-1.30124	-0.308899	0.0278929	0.0152672	5.31844	0.83593
comp2212572_c0_seq1_m.15390	1.30211	0.309992	0.0278026	0.0153257	5.31844	0.83593
comp2261150_c0_seq1_m.53829	1.30248	0.437878	0.0277124	0.0153846	5.31844	0.83593
comp2262185_c0_seq1_m.55318	1.30796	0.717928	0.0275338	0.015444	5.31844	0.83593
comp2272433_c0_seq1_m.73197	1.31045	0.353773	0.0273468	0.0155039	5.31844	0.83593
comp2280591_c0_seq1_m.91233	1.31326	0.547468	0.0272566	0.0155642	5.31844	0.83593
comp2269110_c0_seq3_m.66810	-1.3167	-0.302448	0.0270789	0.015625	5.31844	0.83593
comp2272920_c0_seq1_m.74280	1.31693	0.409357	0.0269887	0.0156863	5.31844	0.83593
comp2270828_c0_seq11_m.69939	-1.31838	-0.409631	0.0268985	0.015748	5.31844	0.83593
comp2259349_c0_seq2_m.50877	-1.32178	-0.455745	0.0265216	0.0158103	5.31844	0.83593
comp2279450_c0_seq1_m.91124	1.21357	0.337599	0.0322425	0.0170068	5.31844	0.83593
comp2132126_c0_seq4_m.6558	1.22008	0.414006	0.0320602	0.0170648	5.31844	0.83593
comp2271419_c1_seq1_m.71009	1.22229	0.511408	0.0319699	0.0171233	5.31844	0.83593
comp2270085_c0_seq9_m.68531	1.22319	0.355003	0.0318797	0.0171821	5.31844	0.83593
comp2265703_c0_seq1_m.60844	-1.22756	-0.430748	0.0317895	0.0172414	5.31844	0.83593
comp2270905_c1_seq5_m.70069	-1.22893	-0.362378	0.0316992	0.017301	5.31844	0.83593
comp2107035_c0_seq2_m.6021	-1.23028	-0.299028	0.031609	0.0173611	5.31844	0.83593
comp2273193_c0_seq1_m.74830	-1.23849	-0.476269	0.0314305	0.0174216	5.31844	0.83593
comp2271307_c0_seq1_m.70799	-1.23989	-0.382607	0.0313402	0.0174825	5.31844	0.83593
comp2264022_c0_seq13_m.58310	1.2412	0.349382	0.03125	0.0175439	5.31844	0.83593
comp2201786_c0_seq1_m.13247	1.242	0.554289	0.0311598	0.0176056	5.31844	0.83593
comp2226333_c0_seq1_m.20670	-1.24525	-0.2824	0.0307932	0.0176678	5.31844	0.83593
comp2234079_c0_seq2_m.24745	1.2488	0.349466	0.0305179	0.0177305	5.31844	0.83593
comp2277617_c1_seq7_m.85877	-1.18708	-0.296286	0.0348618	0.0189274	5.31844	0.83593
comp2272299_c0_seq11_m.72914	-1.18764	-0.400276	0.0347716	0.0189873	5.31844	0.83593
comp2273599_c0_seq7_m.75677	1.18776	0.372444	0.0346814	0.0190476	5.31844	0.83593
comp2257487_c0_seq1_m.48064	-1.18861	-0.247026	0.0345056	0.0191083	5.31844	0.83593
comp2256245_c0_seq1_m.46340	-1.19464	-0.341986	0.034328	0.0191693	5.31844	0.83593
comp2262317_c0_seq2_m.55577	1.19504	0.355	0.0342378	0.0192308	5.31844	0.83593
comp2267341_c0_seq1_m.63653	-1.1969	-0.265158	0.0340602	0.0192926	5.31844	0.83593
comp2271906_c0_seq1_m.72107	1.19745	0.404995	0.0339699	0.0193548	5.31844	0.83593
comp2266500_c0_seq1_m.62123	-1.19821	-0.376196	0.0338797	0.0194175	5.31844	0.83593
comp1199432_c0_seq1_m.1095	-1.20085	-0.372018	0.0336917	0.0194805	5.31844	0.83593
comp1785956_c0_seq1_m.2259	1.20092	0.394165	0.0336015	0.019544	5.31844	0.83593
gnl_Pdu_trscr_assembly_1_4228_m.63259	-1.201	-0.462309	0.0335113	0.0196078	5.31844	0.83593
comp2274413_c0_seq1_m.77564	1.20142	0.517888	0.0334211	0.0196721	5.31844	0.83593
comp2271350_c0_seq18_m.70898	1.20157	0.30436	0.0333308	0.0197368	5.31844	0.83593
comp2273813_c0_seq2_m.76128	1.20197	0.322105	0.0332406	0.019802	5.31844	0.83593
comp2277982_c0_seq2_m.87136	1.20353	0.326089	0.0331504	0.0198675	5.31844	0.83593
comp2273142_c0_seq1_m.74744	-1.20356	-0.410134	0.0330602	0.0199336	5.31844	0.83593
comp2278470_c0_seq2_m.89275	1.20432	0.610404	0.0329699	0.02	5.31844	0.83593
comp2263771_c0_seq2_m.57851	1.20645	0.309726	0.0328797	0.0200669	5.31844	0.83593
comp2197446_c0_seq1_m.12404	1.20876	0.313765	0.0327895	0.0201342	5.31844	0.83593
comp2253077_c0_seq1_m.42045	1.20965	0.282619	0.0326992	0.020202	5.31844	0.83593
comp2268892_c0_seq1_m.66381	-1.21157	-0.509857	0.032609	0.0202703	5.31844	0.83593
comp2249005_c0_seq2_m.37257	1.21282	0.280806	0.0325188	0.020339	5.31844	0.83593
comp2278276_c0_seq16_m.88350	1.16488	0.360311	0.03636	0.0215385	5.31844	0.83593
comp2276743_c0_seq1_m.83169	1.16571	0.328623	0.0362697	0.0216049	5.31844	0.83593
comp2202068_c0_seq1_m.13304	-1.16788	-0.260387	0.0361795	0.0216718	5.31844	0.83593
comp2262441_c0_seq1_m.55760	-1.16813	-0.300863	0.0359925	0.0217391	5.31844	0.83593
comp2246119_c0_seq1_m.34306	1.17649	0.327444	0.0354164	0.0218069	5.31844	0.83593
comp2228430_c0_seq1_m.21640	1.177	0.341959	0.0353261	0.021875	5.31844	0.83593
comp2269906_c0_seq2_m.68214	-1.17978	-0.362107	0.0352359	0.0219436	5.31844	0.83593
comp2236614_c0_seq1_m.26450	1.18014	0.339541	0.0351457	0.0220126	5.31844	0.83593
comp2277933_c1_seq7_m.86946	1.14785	0.29327	0.0370235	0.0243902	5.31844	0.83593
comp2276968_c0_seq3_m.83862	1.1496	0.340374	0.0368412	0.0244648	5.31844	0.83593
comp2266005_c0_seq5_m.61322	1.151	0.47236	0.0365385	0.0245399	5.31844	0.83593
comp1961272_c0_seq1_m.3584	1.11547	0.39057	0.0393468	0.0264706	5.31844	0.83593
comp2211270_c0_seq1_m.14951	1.12236	0.368329	0.0392566	0.0265487	5.31844	0.83593
comp2269326_c0_seq2_m.67220	-1.12573	-0.267226	0.0389821	0.0266272	5.31844	0.83593
comp2262720_c0_seq1_m.56199	1.12702	0.340194	0.0386992	0.0267062	5.31844	0.83593
comp2276413_c0_seq21_m.82313	-1.12801	-0.291669	0.038609	0.0267857	5.31844	0.83593
comp2247176_c0_seq3_m.35337	-1.12802	-0.293814	0.0385188	0.0268657	5.31844	0.83593
comp2270845_c1_seq1_m.69967	1.12834	0.321177	0.0384286	0.0269461	5.31844	0.83593
comp2256216_c0_seq9_m.46312	1.13088	0.394037	0.0382406	0.027027	5.31844	0.83593
comp2275769_c0_seq3_m.80583	1.13216	0.29118	0.0381504	0.0271084	5.31844	0.83593
comp2214845_c0_seq1_m.16111	1.13621	0.321336	0.0377735	0.0271903	5.31844	0.83593
comp2272683_c0_seq1_m.73725	1.13916	0.236399	0.037578	0.0272727	5.31844	0.83593
comp2272495_c0_seq1_m.73308	1.14278	0.412054	0.0372989	0.0273556	5.31844	0.83593
comp2245511_c0_seq1_m.33658	-1.11444	-0.370447	0.0396156	0.0292398	5.31844	0.83593
comp2265464_c0_seq1_m.60472	-1.11459	-0.418604	0.0395254	0.0293255	5.31844	0.83593
comp2258193_c0_seq1_m.49089	-1.11257	-0.248992	0.0397942	0.03207	5.31844	0.83593
comp2278363_c0_seq7_m.88713	-1.10419	-0.27226	0.0407904	0.034384	5.31844	0.83593
comp2271535_c0_seq1_m.71319	1.10836	0.281996	0.0405066	0.0344828	5.31844	0.83593
comp2258437_c0_seq2_m.49437	1.10918	0.346144	0.0404164	0.0345821	5.31844	0.83593
comp2276166_c0_seq8_m.81705	1.10962	0.38006	0.0403261	0.0346821	5.31844	0.83593
comp2273628_c0_seq6_m.75728	-1.10985	-0.361695	0.0402359	0.0347826	5.31844	0.83593
gnl_Pdu_trscr_assembly_1_3048_m.12984	1.11079	0.310807	0.0401457	0.0348837	5.31844	0.83593
comp2252059_c0_seq1_m.40786	1.07486	0.279543	0.0441212	0.0353261	5.31844	0.83593
comp2246502_c0_seq1_m.34680	-1.07557	-0.298935	0.044031	0.0354223	5.31844	0.83593
comp1888169_c0_seq2_m.2479	1.07611	0.481901	0.0439408	0.0355191	5.31844	0.83593
comp2250906_c0_seq2_m.39444	-1.07717	-0.288475	0.0438506	0.0356164	5.31844	0.83593
comp2276719_c0_seq5_m.83124	-1.08243	-0.354363	0.0434521	0.0357143	5.31844	0.83593
comp2269345_c0_seq1_m.67253	1.08385	0.313002	0.0431729	0.0358127	5.31844	0.83593
comp2264855_c0_seq1_m.59451	-1.08483	-0.267895	0.0430827	0.0359116	5.31844	0.83593
gnl_Pdu_trscr_assembly_1_17807_m.62055	1.08653	0.260755	0.0428947	0.0360111	5.31844	0.83593
comp2267483_c0_seq3_m.63903	-1.08889	-0.335253	0.0427171	0.0361111	5.31844	0.83593
comp2265255_c2_seq1_m.60100	1.08915	0.437824	0.0426269	0.0362117	5.31844	0.83593
comp2273249_c0_seq4_m.74967	-1.0893	-0.365197	0.0424398	0.0363128	5.31844	0.83593
comp2266680_c0_seq1_m.62479	-1.08997	-0.282119	0.0423496	0.0364146	5.31844	0.83593
comp2266439_c0_seq1_m.62025	1.09023	0.337216	0.0422594	0.0365169	5.31844	0.83593
comp2273576_c0_seq1_m.75622	1.09025	0.324149	0.0421692	0.0366197	5.31844	0.83593
comp2278485_c0_seq1_m.89371	1.09029	0.351428	0.0420789	0.0367232	5.31844	0.83593
comp2274137_c1_seq25_m.76929	-1.09143	-0.439367	0.0419013	0.0368272	5.31844	0.83593
comp2270148_c0_seq3_m.68661	-1.09196	-0.226845	0.0415301	0.0369318	5.31844	0.83593
comp2279235_c0_seq1_m.91078	-1.09814	-0.336167	0.0412472	0.037037	5.31844	0.83593
comp2275508_c1_seq3_m.80009	-1.09911	-0.462819	0.041157	0.0371429	5.31844	0.83593
comp2273017_c0_seq1_m.74484	-1.07116	-0.244177	0.0450573	0.0376344	5.31844	0.83593
comp2275406_c1_seq7_m.79751	1.0722	0.256195	0.0447566	0.0377358	5.31844	0.83593
comp2269171_c0_seq3_m.66933	1.07227	0.376634	0.0446664	0.0378378	5.31844	0.83593
comp2272182_c0_seq2_m.72649	1.07312	0.333769	0.0445761	0.0379404	5.31844	0.83593
comp1194322_c0_seq2_m.793	1.05518	0.253602	0.0470122	0.0394737	5.31844	0.83593
comp2234282_c0_seq1_m.24908	1.05841	0.292796	0.0468167	0.0395778	5.31844	0.83593
comp2256252_c0_seq1_m.46348	1.05854	0.707128	0.0467265	0.0396825	5.31844	0.83593
comp2263691_c0_seq2_m.57661	-1.06542	-0.322485	0.0461645	0.0397878	5.31844	0.83593
comp2245053_c0_seq1_m.33185	1.06667	0.459917	0.0460742	0.0398936	5.31844	0.83593
comp2276202_c0_seq3_m.81780	1.06692	0.331588	0.045984	0.04	5.31844	0.83593
comp2276031_c0_seq51_m.81296	1.06777	0.372044	0.0457961	0.040107	5.31844	0.83593
comp2263983_c0_seq1_m.58208	1.06944	0.237273	0.0454201	0.0402145	5.31844	0.83593
comp2274242_c0_seq2_m.77187	-1.04379	-0.24569	0.0498468	0.046875	5.31844	0.83593
comp2272863_c1_seq5_m.74143	-1.04605	-0.250795	0.0490179	0.0469974	5.31844	0.83593
comp2248254_c1_seq2_m.36433	1.04648	0.422075	0.0489276	0.0471204	5.31844	0.83593
comp2279272_c0_seq1_m.91086	1.04688	0.261577	0.0488374	0.0472441	5.31844	0.83593
comp2272233_c0_seq1_m.72760	-1.03475	-0.247722	0.0506852	0.0489691	5.31844	0.83593
tuba_m.92505	1.03738	0.389055	0.0505949	0.0490956	5.31844	0.83593
comp2274259_c0_seq1_m.77220	1.03766	0.328207	0.0505047	0.0492228	5.31844	0.83593
comp2235922_c0_seq1_m.25983	-1.04009	-0.299869	0.0503167	0.0493506	5.31844	0.83593
comp2276936_c0_seq3_m.83786	1.01071	0.311017	0.0545517	0.0496278	5.31844	0.83593
comp2275358_c0_seq1_m.79627	-1.01109	-0.263451	0.0544615	0.0497512	5.31844	0.83593
comp2269793_c0_seq1_m.68039	1.0146	0.260508	0.0540047	0.0498753	5.31844	0.83593
isotig10568_m.92324	-1.01605	-0.480212	0.0538224	0.05	5.31844	0.83593
comp2254376_c0_seq1_m.43911	1.01958	0.28505	0.0533628	0.0501253	5.31844	0.83593
comp2273385_c0_seq1_m.75218	1.02285	0.309266	0.0529803	0.0502513	5.31844	0.83593
comp2260797_c0_seq1_m.53088	-1.02574	-0.245002	0.0528045	0.0503778	5.31844	0.83593
comp2269060_c1_seq1_m.66719	-1.02586	-0.406234	0.0527143	0.0505051	5.31844	0.83593
comp2274541_c0_seq1_m.77862	-1.02768	-0.437881	0.052532	0.0506329	5.31844	0.83593
comp2274517_c0_seq1_m.77807	1.02808	0.249928	0.0524417	0.0507614	5.31844	0.83593
comp2265328_c0_seq2_m.60206	-1.02875	-0.273042	0.0521682	0.0508906	5.31844	0.83593
comp2279297_c0_seq1_m.91091	1.0293	0.218248	0.0519906	0.0510204	5.31844	0.83593
gnl_Pdu_trscr_assembly_1_7964_m.49648	1.02935	0.271266	0.0519004	0.0511509	5.31844	0.83593
comp2139380_c0_seq1_m.6935	1.02999	0.343092	0.0518102	0.0512821	5.31844	0.83593
comp2265077_c0_seq1_m.59810	-1.03093	-0.221807	0.0515357	0.0514139	5.31844	0.83593
comp2278076_c0_seq2_m.87463	0.997869	0.285504	0.0561194	0.0540541	5.31844	0.83593
comp2265897_c0_seq5_m.61166	0.998657	0.231684	0.055937	0.0541872	5.31844	0.83593
comp2232909_c0_seq1_m.24034	0.998678	0.384755	0.0558468	0.054321	5.31844	0.83593
comp2271526_c0_seq3_m.71285	-1.00593	-0.333999	0.0550263	0.0544554	5.31844	0.83593
comp2274446_c0_seq19_m.77642	-0.984967	-0.22845	0.0573346	0.0562347	5.31844	0.83593
comp2270119_c0_seq15_m.68605	0.985956	0.255507	0.0571551	0.0563725	5.31844	0.83593
comp2273216_c0_seq3_m.74900	0.970136	0.205568	0.0595385	0.0574163	5.31844	0.83593
comp2278238_c0_seq6_m.88188	0.97127	0.254693	0.05936	0.057554	5.31844	0.83593
comp2271649_c0_seq1_m.71599	-0.972628	-0.320066	0.0592697	0.0576923	5.31844	0.83593
comp2277352_c0_seq3_m.84974	0.974496	0.183909	0.0590921	0.0578313	5.31844	0.83593
comp2257282_c0_seq1_m.47769	-0.974744	-0.245743	0.0590019	0.057971	5.31844	0.83593
comp2276040_c1_seq5_m.81315	0.974886	0.242769	0.0589117	0.0581114	5.31844	0.83593
comp2231610_c0_seq1_m.23229	0.976302	0.249718	0.0583684	0.0582524	5.31844	0.83593
comp2277740_c0_seq2_m.86258	-0.97646	-0.290769	0.0582782	0.0583942	5.31844	0.83593
comp2260058_c0_seq1_m.51934	-0.979641	-0.326693	0.057984	0.0585366	5.31844	0.83593
comp2278062_c0_seq4_m.87412	0.959337	0.241172	0.0611165	0.0593824	5.31844	0.83593
comp2271425_c0_seq4_m.71034	-0.960646	-0.204362	0.0609389	0.0595238	5.31844	0.83593
comp2272319_c0_seq24_m.72950	0.962433	0.2289	0.0608487	0.0596659	5.31844	0.83593
comp2275759_c0_seq17_m.80560	-0.939071	-0.18334	0.0650714	0.062212	5.31844	0.83593
comp2275266_c0_seq21_m.79421	-0.940509	-0.245164	0.0649812	0.0623557	5.31844	0.83593
comp1769718_c0_seq1_m.2239	0.941268	0.343362	0.0646034	0.0625	5.31844	0.83593
comp2274096_c1_seq4_m.76855	0.942793	0.312688	0.0640564	0.062645	5.31844	0.83593
gnl_Pdu_trscr_assembly_1_1213_m.70099	-0.943399	-0.237497	0.0637895	0.0627907	5.31844	0.83593
comp2279615_c0_seq1_m.91158	-0.943664	-0.206731	0.0636118	0.0629371	5.31844	0.83593
comp1234630_c0_seq1_m.1254	-0.944312	-0.267263	0.0635216	0.0630841	5.31844	0.83593
comp2277388_c0_seq8_m.85093	-0.945798	-0.392513	0.0632472	0.0632319	5.31844	0.83593
comp2256558_c1_seq1_m.46706	-0.945961	-0.308966	0.063157	0.0633803	5.31844	0.83593
comp2279213_c0_seq1_m.91075	-0.947729	-0.240446	0.0629746	0.0635294	5.31844	0.83593
comp1335339_c0_seq2_m.1954	0.950899	0.234927	0.0625244	0.0636792	5.31844	0.83593
comp2277722_c0_seq17_m.86189	-0.952433	-0.248415	0.0621579	0.0638298	5.31844	0.83593
comp2264621_c0_seq1_m.59138	-0.930666	-0.328522	0.0665583	0.0639269	5.31844	0.83593
comp2270472_c0_seq1_m.69272	0.955254	0.227572	0.061891	0.063981	5.31844	0.83593
comp2245687_c1_seq1_m.33822	0.931363	0.419214	0.066468	0.0640732	5.31844	0.83593
gnl_Pdu_trscr_assembly_1_1797_m.38383	0.932988	0.236198	0.0660959	0.0642202	5.31844	0.83593
comp2269023_c0_seq1_m.66650	0.936539	0.202456	0.0655338	0.0643678	5.31844	0.83593
comp2258806_c0_seq1_m.49958	0.918893	0.335933	0.0685338	0.0680272	5.31844	0.83593
comp2276442_c0_seq1_m.82386	-0.919159	-0.216579	0.0684436	0.0681818	5.31844	0.83593
comp2272961_c0_seq1_m.74370	0.920845	0.21791	0.0677857	0.0683371	5.31844	0.83593
comp2214888_c0_seq1_m.16124	0.916332	0.213884	0.0689878	0.0699774	5.31844	0.83593
comp2258349_c0_seq1_m.49322	-0.916486	-0.296836	0.0688976	0.0701357	5.31844	0.83593
comp2257975_c0_seq1_m.48752	0.907537	0.214042	0.0712152	0.0738255	5.31844	0.83593
comp2258014_c0_seq1_m.48797	-0.911263	-0.305169	0.0701006	0.073991	5.31844	0.83593
comp2265589_c0_seq2_m.60673	-0.912962	-0.220098	0.0700103	0.0741573	5.31844	0.83593
comp2260971_c0_seq1_m.53490	0.913303	0.295135	0.0698224	0.0743243	5.31844	0.83593
comp2271244_c0_seq1_m.70676	0.903906	0.267999	0.0720564	0.0755556	5.31844	0.83593
comp2262197_c0_seq1_m.55346	0.904689	0.314251	0.0719662	0.0757238	5.31844	0.83593
gnl_Pdu_trscr_assembly_1_19681_m.92605	0.905499	0.269529	0.0717782	0.0758929	5.31844	0.83593
comp2277176_c0_seq2_m.84466	0.902095	0.235008	0.072531	0.0798226	5.31844	0.83593
comp2143411_c0_seq1_m.7656	-0.891155	-0.315204	0.0751739	0.08061	5.31844	0.83593
comp2266882_c0_seq1_m.62832	0.891301	0.286674	0.0750836	0.080786	5.31844	0.83593
comp1226347_c0_seq1_m.1231	0.891462	0.191488	0.0749934	0.0809628	5.31844	0.83593
comp2278554_c0_seq4_m.90013	-0.894569	-0.259221	0.0744323	0.0811404	5.31844	0.83593
comp2261603_c1_seq1_m.54400	-0.895339	-0.240975	0.0742566	0.0813187	5.31844	0.83593
gnl_Pdu_trscr_assembly_1_9334_m.28552	0.897554	0.231491	0.073547	0.0814978	5.31844	0.83593
comp2198016_c0_seq1_m.12499	0.897996	0.210889	0.0734568	0.0816777	5.31844	0.83593
comp2142866_c0_seq1_m.7576	0.898732	0.286867	0.0733665	0.0818584	5.31844	0.83593
comp2248791_c1_seq1_m.37027	0.889261	0.249974	0.0759408	0.0847826	5.31844	0.83593
comp2263768_c0_seq2_m.57843	-0.881764	-0.280747	0.0773759	0.0932755	5.31844	0.83593
comp2269773_c0_seq6_m.68002	0.872093	0.173994	0.0789267	0.0948276	5.31844	0.83593
comp2278605_c1_seq8_m.90480	0.877179	0.255567	0.0783722	0.0950324	5.31844	0.83593
comp2277243_c1_seq3_m.84671	0.88016	0.222918	0.0777547	0.0952381	5.31844	0.83593
comp2277075_c0_seq2_m.84155	0.870656	0.219852	0.0793853	0.0967742	5.31844	0.83593
comp2187328_c0_seq1_m.10936	0.86642	0.254323	0.0808487	0.0974576	5.31844	0.83593
comp2264121_c0_seq1_m.58459	0.866614	0.364541	0.0806617	0.0976645	5.31844	0.83593
comp2272698_c0_seq4_m.73763	0.867341	0.184202	0.080484	0.0978723	5.31844	0.83593
comp2274483_c0_seq20_m.77737	0.868391	0.272436	0.0803064	0.098081	5.31844	0.83593
comp2274888_c0_seq2_m.78557	0.868532	0.254169	0.0801306	0.0982906	5.31844	0.83593
comp2260519_c0_seq10_m.52611	-0.868701	-0.245571	0.0800404	0.0985011	5.31844	0.83593
comp2278405_c0_seq22_m.88893	0.868849	0.25751	0.0798628	0.0987124	5.31844	0.83593

## Sheet: IM_NM vs PM_NM_Male
	d	logFC	pvalue	FDR	Z	R
comp1194290_c0_seq1_m.781	-1.93625	-0.635706	0.0128515	0	5.07344	0.806357
comp1194294_c0_seq1_m.785	1.93104	0.342975	0.0131222	0	5.07344	0.806357
comp1197507_c0_seq1_m.1032	-1.90996	-0.28007	0.0140207	0	5.07344	0.806357
comp1198575_c0_seq1_m.1066	-2.19526	-0.399311	0.0100414	0	5.07344	0.806357
comp1199432_c0_seq1_m.1095	-1.97882	-0.413403	0.0123102	0	5.07344	0.806357
comp1244797_c0_seq1_m.1278	3.1344	0.432074	0.00209117	0	5.07344	0.806357
comp1335339_c0_seq2_m.1954	2.02383	0.404949	0.011859	0	5.07344	0.806357
comp1916779_c0_seq1_m.2944	-1.90762	-0.319464	0.0141983	0	5.07344	0.806357
comp1926910_c0_seq1_m.3122	-2.28104	-0.357134	0.00941165	0	5.07344	0.806357
comp1953077_c0_seq1_m.3483	-2.18455	-0.568844	0.0102218	0	5.07344	0.806357
comp1953876_c0_seq1_m.3493	2.35611	0.527169	0.00823872	0	5.07344	0.806357
comp1958245_c0_seq1_m.3536	-2.66303	-0.382399	0.00407331	0	5.07344	0.806357
comp2141997_c0_seq1_m.7386	2.50077	0.999483	0.00643421	0	5.07344	0.806357
comp2189372_c0_seq1_m.11219	-2.60792	-0.509482	0.00479323	0	5.07344	0.806357
comp2198016_c0_seq1_m.12499	1.95717	0.301121	0.0125808	0	5.07344	0.806357
comp2201786_c0_seq1_m.13247	1.9328	0.750613	0.0129417	0	5.07344	0.806357
comp2203251_c0_seq1_m.13504	2.0548	0.364837	0.0115902	0	5.07344	0.806357
comp2204754_c0_seq1_m.13720	2.77101	0.591491	0.00353195	0	5.07344	0.806357
comp2208474_c0_seq1_m.14351	-2.50362	-0.547758	0.00634398	0	5.07344	0.806357
comp2224448_c0_seq1_m.19874	-2.05776	-0.35122	0.0115	0	5.07344	0.806357
comp2225664_c0_seq1_m.20382	2.3818	0.466026	0.00778759	0	5.07344	0.806357
comp2226643_c0_seq1_m.20830	-2.4314	-0.416123	0.00697556	0	5.07344	0.806357
comp2229729_c0_seq1_m.22264	6.24864	0.985669	9.02256e-05	0	5.07344	0.806357
comp2232909_c0_seq1_m.24034	4.25569	1.46019	0.000270677	0	5.07344	0.806357
comp2237468_c0_seq1_m.27022	-3.86999	-1.35691	0.000721805	0	5.07344	0.806357
comp2238188_c0_seq1_m.27576	-1.95318	-0.546201	0.0126711	0	5.07344	0.806357
comp2244716_c0_seq1_m.32883	1.98236	0.424638	0.0121297	0	5.07344	0.806357
comp2245014_c0_seq2_m.33157	-2.51836	-0.592373	0.00616353	0	5.07344	0.806357
comp2247988_c0_seq1_m.36173	-2.84711	-0.608307	0.00326128	0	5.07344	0.806357
comp2248821_c1_seq2_m.37050	-2.59588	-0.42531	0.00497368	0	5.07344	0.806357
comp2249005_c0_seq2_m.37257	2.45952	0.391115	0.00670489	0	5.07344	0.806357
comp2252285_c0_seq2_m.41107	-3.16938	-0.458357	0.00191071	0	5.07344	0.806357
comp2252847_c0_seq1_m.41763	1.96485	0.348029	0.0124906	0	5.07344	0.806357
comp2253856_c0_seq1_m.43254	-2.57147	-0.461981	0.00517105	0	5.07344	0.806357
comp2253875_c0_seq1_m.43271	2.32441	0.5144	0.00878008	0	5.07344	0.806357
comp2254346_c0_seq1_m.43876	2.47315	0.893105	0.00652444	0	5.07344	0.806357
comp2254520_c0_seq1_m.44059	-3.27592	-0.621356	0.00164004	0	5.07344	0.806357
comp2254641_c1_seq1_m.44200	-2.3269	-0.378021	0.0085094	0	5.07344	0.806357
comp2254675_c0_seq1_m.44244	-2.52785	-0.37555	0.00607331	0	5.07344	0.806357
comp2257395_c0_seq4_m.47951	4.49521	1.27837	0.000180451	0	5.07344	0.806357
comp2257585_c0_seq1_m.48216	2.44837	0.616037	0.00679511	0	5.07344	0.806357
comp2257633_c0_seq1_m.48279	-2.37775	-0.427191	0.00805827	0	5.07344	0.806357
comp2257674_c0_seq1_m.48339	2.429	1.07354	0.00706579	0	5.07344	0.806357
comp2257905_c0_seq1_m.48664	-3.28841	-0.695433	0.00145959	0	5.07344	0.806357
comp2257939_c0_seq1_m.48703	-2.54597	-0.510828	0.00553195	0	5.07344	0.806357
comp2258609_c0_seq1_m.49647	1.93207	0.357427	0.013032	0	5.07344	0.806357
comp2259221_c0_seq1_m.50687	2.53316	0.42324	0.00580263	0	5.07344	0.806357
comp2259363_c0_seq16_m.50888	1.88557	0.305621	0.0146494	0	5.07344	0.806357
comp2260103_c0_seq1_m.51994	-2.14429	-0.375492	0.010688	0	5.07344	0.806357
comp2260394_c0_seq1_m.52394	-1.90607	-0.368415	0.0143788	0	5.07344	0.806357
comp2261018_c0_seq2_m.53614	-2.17257	-0.40733	0.010312	0	5.07344	0.806357
comp2261395_c0_seq1_m.54150	2.23308	0.743763	0.00977068	0	5.07344	0.806357
comp2262731_c0_seq1_m.56213	2.10296	0.535175	0.0110489	0	5.07344	0.806357
comp2263115_c0_seq2_m.56831	3.35446	0.666961	0.00136936	0	5.07344	0.806357
comp2263250_c0_seq1_m.57052	-2.08842	-0.352407	0.0112293	0	5.07344	0.806357
comp2263346_c1_seq31_m.57192	-2.29674	-0.421821	0.00914098	0	5.07344	0.806357
comp2263394_c0_seq1_m.57263	1.91791	0.575062	0.0137528	0	5.07344	0.806357
comp2264022_c0_seq13_m.58310	2.6625	0.543568	0.00416353	0	5.07344	0.806357
comp2264621_c0_seq1_m.59138	-1.98152	-0.499217	0.0122199	0	5.07344	0.806357
comp2264838_c0_seq3_m.59436	-4.11719	-1.38782	0.000360902	0	5.07344	0.806357
comp2265049_c0_seq3_m.59764	2.40526	0.776285	0.00733647	0	5.07344	0.806357
comp2265656_c0_seq3_m.60780	2.40248	0.509583	0.00742669	0	5.07344	0.806357
comp2265768_c0_seq2_m.60943	-2.3958	-0.67352	0.00751692	0	5.07344	0.806357
comp2266507_c0_seq10_m.62138	-4.08549	-0.660647	0.000451128	0	5.07344	0.806357
comp2266680_c0_seq1_m.62479	-1.90732	-0.370928	0.0142885	0	5.07344	0.806357
comp2266692_c0_seq1_m.62504	2.5322	0.569115	0.00598308	0	5.07344	0.806357
comp2266701_c0_seq3_m.62512	2.59768	0.628186	0.00488346	0	5.07344	0.806357
comp2267172_c0_seq1_m.63318	2.18895	0.483599	0.0101316	0	5.07344	0.806357
comp2267571_c0_seq4_m.64058	-2.32665	-0.556405	0.00859962	0	5.07344	0.806357
comp2267732_c0_seq2_m.64331	-3.94768	-0.63458	0.000631579	0	5.07344	0.806357
comp2268115_c0_seq2_m.65034	-2.0962	-0.4643	0.0111391	0	5.07344	0.806357
comp2268340_c1_seq1_m.65478	2.31653	0.477058	0.0088703	0	5.07344	0.806357
comp2268798_c0_seq2_m.66233	2.14205	0.453197	0.0107782	0	5.07344	0.806357
comp2268869_c0_seq6_m.66344	2.07981	0.843187	0.0114098	0	5.07344	0.806357
comp2268937_c0_seq1_m.66472	2.46945	0.440872	0.00661466	0	5.07344	0.806357
comp2269158_c0_seq1_m.66914	2.72655	0.444578	0.00380263	0	5.07344	0.806357
comp2269185_c0_seq2_m.66963	-3.28495	-0.567412	0.00154981	0	5.07344	0.806357
comp2269201_c0_seq1_m.67004	-1.87492	-0.805611	0.0149182	0	5.07344	0.806357
comp2269321_c1_seq1_m.67212	-2.94908	-0.54829	0.00272274	0	5.07344	0.806357
comp2269611_c0_seq1_m.67728	2.30832	0.470721	0.00905075	0	5.07344	0.806357
comp2269627_c0_seq2_m.67749	2.61785	0.487058	0.00470301	0	5.07344	0.806357
comp2269814_c0_seq1_m.68069	1.89832	0.392319	0.014469	0	5.07344	0.806357
comp2269850_c0_seq1_m.68122	2.5364	0.580149	0.00571241	0	5.07344	0.806357
comp2269987_c0_seq2_m.68354	2.41992	0.51324	0.00724624	0	5.07344	0.806357
comp2270220_c0_seq1_m.68776	2.12808	0.484814	0.0108684	0	5.07344	0.806357
comp2270279_c0_seq7_m.68904	-2.83658	-0.510328	0.0033515	0	5.07344	0.806357
comp2270404_c0_seq3_m.69137	-2.39384	-0.610895	0.00769737	0	5.07344	0.806357
comp2270576_c0_seq1_m.69463	2.22031	0.584504	0.0098609	0	5.07344	0.806357
comp2270876_c0_seq2_m.70018	-2.56886	-0.477348	0.0053515	0	5.07344	0.806357
comp2271526_c0_seq3_m.71285	-2.98921	-0.58322	0.00254229	0	5.07344	0.806357
comp2271737_c1_seq2_m.71770	-3.71095	-0.720763	0.000901316	0	5.07344	0.806357
comp2272437_c1_seq1_m.73204	-2.64795	-0.66886	0.00443233	0	5.07344	0.806357
comp2272547_c0_seq4_m.73421	-2.51679	-0.433734	0.00625376	0	5.07344	0.806357
comp2272691_c0_seq4_m.73750	2.93299	0.855605	0.00281297	0	5.07344	0.806357
comp2273141_c0_seq2_m.74737	1.92541	0.354525	0.0133929	0	5.07344	0.806357
comp2273257_c0_seq9_m.74986	2.26375	0.631117	0.00959211	0	5.07344	0.806357
comp2273417_c0_seq5_m.75297	-1.87888	-0.489969	0.014828	0	5.07344	0.806357
comp2273599_c0_seq7_m.75677	2.11955	0.365905	0.0109586	0	5.07344	0.806357
comp2273926_c0_seq5_m.76421	3.94986	1.25604	0.000541353	0	5.07344	0.806357
comp2274106_c1_seq2_m.76871	2.08701	0.633038	0.0113195	0	5.07344	0.806357
comp2274242_c0_seq2_m.77187	-1.99919	-0.331601	0.0120395	0	5.07344	0.806357
comp2274278_c0_seq6_m.77267	-2.43698	-0.50639	0.00688534	0	5.07344	0.806357
comp2274295_c0_seq2_m.77311	3.3954	0.620773	0.00127914	0	5.07344	0.806357
comp2274413_c0_seq1_m.77564	2.27281	0.613363	0.00950188	0	5.07344	0.806357
comp2274474_c0_seq5_m.77718	-2.22007	-0.655886	0.00995113	0	5.07344	0.806357
comp2274787_c0_seq1_m.78332	-1.92598	-0.330778	0.0133026	0	5.07344	0.806357
comp2274909_c0_seq7_m.78613	3.0699	1.42749	0.00245207	0	5.07344	0.806357
comp2274909_c0_seq7_m.78615	2.95544	1.44042	0.00263252	0	5.07344	0.806357
comp2275107_c0_seq4_m.79080	-2.15292	-0.294914	0.0104906	0	5.07344	0.806357
comp2275241_c0_seq5_m.79383	2.57141	0.460685	0.00526128	0	5.07344	0.806357
comp2275391_c0_seq1_m.79711	-2.34368	-0.572651	0.00841917	0	5.07344	0.806357
comp2275523_c0_seq29_m.80039	2.53246	0.567146	0.00589286	0	5.07344	0.806357
comp2275674_c1_seq1_m.80370	-2.32601	-0.727148	0.00868985	0	5.07344	0.806357
comp2275701_c1_seq1_m.80440	2.35233	0.738304	0.00832895	0	5.07344	0.806357
comp2275841_c0_seq1_m.80783	-2.66343	-0.58956	0.00389286	0	5.07344	0.806357
comp2275893_c0_seq1_m.80933	-3.14176	-0.876949	0.00200094	0	5.07344	0.806357
comp2276035_c1_seq16_m.81307	-2.76258	-0.618075	0.00362218	0	5.07344	0.806357
comp2276151_c0_seq3_m.81648	1.9303	0.389179	0.0132124	0	5.07344	0.806357
comp2276389_c1_seq15_m.82250	-2.38078	-0.349411	0.00787782	0	5.07344	0.806357
comp2276577_c0_seq8_m.92288	2.53795	0.860431	0.00562218	0	5.07344	0.806357
comp2276668_c0_seq1_m.83017	-2.29616	-0.582307	0.0092312	0	5.07344	0.806357
comp2276804_c0_seq1_m.83376	-2.04706	-0.558453	0.0116805	0	5.07344	0.806357
comp2276805_c0_seq8_m.83380	1.92402	0.45715	0.0134831	0	5.07344	0.806357
comp2276936_c0_seq3_m.83786	2.73325	0.474691	0.00371241	0	5.07344	0.806357
comp2277114_c1_seq1_m.84278	1.93793	0.704135	0.0127613	0	5.07344	0.806357
comp2277416_c0_seq3_m.85174	3.20337	0.634181	0.00173026	0	5.07344	0.806357
comp2277680_c0_seq25_m.86056	-2.63954	-0.392123	0.00461278	0	5.07344	0.806357
comp2277908_c1_seq11_m.86865	2.0188	0.390233	0.0119492	0	5.07344	0.806357
comp2277933_c1_seq7_m.86946	1.9192	0.297514	0.0135733	0	5.07344	0.806357
comp2277947_c0_seq1_m.86990	-3.09352	-0.462769	0.00236184	0	5.07344	0.806357
comp2277995_c0_seq1_m.87177	1.89655	0.322511	0.0145592	0	5.07344	0.806357
comp2278010_c1_seq9_m.87231	-2.36262	-0.648826	0.0081485	0	5.07344	0.806357
comp2278077_c0_seq3_m.87468	2.37923	0.533494	0.00796805	0	5.07344	0.806357
comp2278366_c0_seq5_m.88731	-2.54834	-0.442377	0.00544173	0	5.07344	0.806357
comp2278471_c0_seq8_m.89279	1.86853	0.320349	0.0150987	0	5.07344	0.806357
comp2278474_c0_seq1_m.89294	-2.31613	-0.411055	0.00896053	0	5.07344	0.806357
comp2278630_c0_seq8_m.90809	-1.91489	-0.36203	0.0139305	0	5.07344	0.806357
comp2279213_c0_seq1_m.91075	-2.42296	-0.361993	0.00715602	0	5.07344	0.806357
comp2279523_c0_seq1_m.91136	-2.2831	-0.427672	0.00932143	0	5.07344	0.806357
comp2279567_c0_seq1_m.91146	3.18161	0.667789	0.00182049	0	5.07344	0.806357
comp2280591_c0_seq1_m.91233	2.65014	0.976863	0.00434211	0	5.07344	0.806357
comp2281676_c0_seq1_m.91255	2.80149	0.823648	0.00344173	0	5.07344	0.806357
comp2287273_c0_seq1_contamination_m.91384	2.66313	0.414664	0.00398308	0	5.07344	0.806357
gnl_Pdu_trscr_assembly_1_12794_m.61443	2.39441	0.776226	0.00760714	0	5.07344	0.806357
gnl_Pdu_trscr_assembly_1_14638_m.60097	-2.86678	-0.638913	0.00308365	0	5.07344	0.806357
gnl_Pdu_trscr_assembly_1_1514_m.69841	2.64303	0.603324	0.00452256	0	5.07344	0.806357
gnl_Pdu_trscr_assembly_1_15590_m.29311	3.12582	1.29538	0.00218139	0	5.07344	0.806357
gnl_Pdu_trscr_assembly_1_16296_m.13041	-3.52291	-0.65282	0.00109868	0	5.07344	0.806357
gnl_Pdu_trscr_assembly_1_200732_m.91055	-2.9161	-0.761016	0.0029032	0	5.07344	0.806357
gnl_Pdu_trscr_assembly_1_3048_m.12984	2.90579	0.525172	0.00299342	0	5.07344	0.806357
gnl_Pdu_trscr_assembly_1_4228_m.63259	-1.87001	-0.541668	0.0150085	0	5.07344	0.806357
gnl_Pdu_trscr_assembly_1_7274_m.39240	1.97474	0.91389	0.0124004	0	5.07344	0.806357
gnl_Pdu_trscr_assembly_1_7327_m.81715	-3.11596	-0.640873	0.00227162	0	5.07344	0.806357
gnl_Pdu_trscr_assembly_1_998_m.15062	-3.50941	-0.633046	0.00118891	0	5.07344	0.806357
comp2270905_c1_seq5_m.70069	-1.83747	-0.33264	0.0160977	0.00609756	5.07344	0.806357
comp2257070_c0_seq2_m.47512	1.83788	0.618325	0.0160075	0.00613497	5.07344	0.806357
comp2347711_c0_seq1_contamination_m.91628	-1.84396	-0.452116	0.0159173	0.00617284	5.07344	0.806357
comp2276426_c0_seq2_m.82339	-1.84454	-0.393144	0.0158271	0.00621118	5.07344	0.806357
comp2275853_c0_seq1_m.80817	1.84579	0.454603	0.0157368	0.00625	5.07344	0.806357
comp1977957_c0_seq1_m.3878	1.84603	0.436142	0.0156466	0.00628931	5.07344	0.806357
comp2261876_c0_seq1_m.54865	1.84742	0.493659	0.0155564	0.00632911	5.07344	0.806357
comp2276825_c0_seq1_m.83424	1.85969	0.368245	0.0154662	0.00636943	5.07344	0.806357
comp2275191_c0_seq1_m.79281	1.86387	0.326928	0.0153759	0.00641026	5.07344	0.806357
gnl_Pdu_trscr_assembly_1_3867_m.65412	1.8675	1.19007	0.0152857	0.00645161	5.07344	0.806357
comp1910314_c0_seq1_m.2848	-1.78747	-0.41377	0.0173712	0.0114943	5.07344	0.806357
comp2273249_c0_seq4_m.74967	-1.79908	-0.490785	0.017281	0.0115607	5.07344	0.806357
comp2278480_c0_seq4_m.89330	1.80198	0.433061	0.0171034	0.0116279	5.07344	0.806357
gnl_Pdu_trscr_assembly_1_200732_m.91056	-1.81037	-0.584037	0.0169154	0.0116959	5.07344	0.806357
comp2279340_c0_seq1_m.91103	1.81129	0.557091	0.0168252	0.0117647	5.07344	0.806357
comp2271871_c0_seq8_m.72023	1.81504	0.396193	0.0166457	0.0118343	5.07344	0.806357
comp2279536_c0_seq1_m.91140	-1.81815	-0.332583	0.0165555	0.0119048	5.07344	0.806357
comp2256041_c0_seq1_m.46046	1.81994	0.44177	0.0164652	0.011976	5.07344	0.806357
comp2278333_c0_seq10_m.88591	-1.82244	-0.373533	0.016375	0.0120482	5.07344	0.806357
comp2236614_c0_seq1_m.26450	1.82623	0.459907	0.0162848	0.0121212	5.07344	0.806357
comp2260058_c0_seq1_m.51934	-1.62501	-0.430141	0.0232039	0.0134529	5.07344	0.806357
comp2273356_c0_seq1_m.75157	1.6256	0.25226	0.0231137	0.0135135	5.07344	0.806357
comp2251806_c0_seq1_m.40480	-1.62986	-0.240901	0.0229361	0.0135747	5.07344	0.806357
comp2274137_c1_seq25_m.76929	-1.63012	-0.549327	0.0228459	0.0136364	5.07344	0.806357
comp2271425_c0_seq4_m.71034	-1.63078	-0.211527	0.0227556	0.0136986	5.07344	0.806357
comp2277163_c0_seq1_m.84431	-1.63464	-0.305939	0.022578	0.0137615	5.07344	0.806357
comp2270828_c0_seq11_m.69939	-1.63487	-0.367664	0.0224878	0.0138249	5.07344	0.806357
comp2252059_c0_seq1_m.40786	1.64543	0.30929	0.0223083	0.0138889	5.07344	0.806357
comp2272433_c0_seq1_m.73197	1.66491	0.340539	0.0221212	0.0139535	5.07344	0.806357
comp2272863_c1_seq5_m.74143	-1.66693	-0.249738	0.022031	0.0140187	5.07344	0.806357
comp2273017_c0_seq1_m.74484	-1.66933	-0.268944	0.0219408	0.0140845	5.07344	0.806357
comp2263508_c0_seq1_m.57408	1.67212	0.472895	0.0218506	0.0141509	5.07344	0.806357
comp2223962_c0_seq7_m.19686	-1.67848	-0.38029	0.0216551	0.014218	5.07344	0.806357
gnl_Pdu_trscr_assembly_1_16681_m.81096	1.68	0.21352	0.0215648	0.0142857	5.07344	0.806357
comp2274581_c1_seq21_m.92631	-1.68093	-0.309874	0.0214746	0.0143541	5.07344	0.806357
comp2275714_c2_seq1_m.80469	-1.68147	-0.295864	0.0213844	0.0144231	5.07344	0.806357
comp2277617_c1_seq7_m.85877	-1.69229	-0.298976	0.0212068	0.0144928	5.07344	0.806357
comp2242282_c0_seq1_m.30761	-1.69639	-0.336115	0.0211165	0.0145631	5.07344	0.806357
gnl_Pdu_trscr_assembly_1_2589_m.58494	-1.69888	-0.37549	0.0210263	0.0146341	5.07344	0.806357
comp2214845_c0_seq1_m.16111	1.70102	0.368993	0.0209361	0.0147059	5.07344	0.806357
comp2261716_c0_seq2_m.54597	1.70149	0.328466	0.0208459	0.0147783	5.07344	0.806357
comp2269009_c0_seq1_m.66627	-1.70153	-0.39338	0.0207556	0.0148515	5.07344	0.806357
comp2273765_c1_seq6_m.76032	1.70164	0.623505	0.0206654	0.0149254	5.07344	0.806357
comp2274748_c1_seq11_m.78259	-1.70192	-0.25428	0.0205752	0.015	5.07344	0.806357
comp2272087_c2_seq11_m.72459	1.70872	0.338936	0.0203929	0.0150754	5.07344	0.806357
comp2257070_c0_seq2_m.47513	1.70937	0.356894	0.0203026	0.0151515	5.07344	0.806357
comp2271567_c0_seq1_m.71391	1.70964	0.433501	0.0202124	0.0152284	5.07344	0.806357
gnl_Pdu_trscr_assembly_1_11607_m.26425	1.7118	0.447315	0.0201222	0.0153061	5.07344	0.806357
comp2271413_c1_seq5_m.70995	-1.71906	-0.365049	0.020032	0.0153846	5.07344	0.806357
comp2271594_c0_seq8_m.71451	-1.71993	-0.587885	0.0199417	0.0154639	5.07344	0.806357
comp2275445_c0_seq2_m.79869	-1.72637	-0.381019	0.0197547	0.015544	5.07344	0.806357
comp2278623_c0_seq6_m.90693	1.72921	0.418939	0.0196645	0.015625	5.07344	0.806357
comp2276413_c0_seq21_m.82313	-1.73431	-0.301127	0.0194774	0.0157068	5.07344	0.806357
comp2249227_c0_seq1_m.37479	-1.73827	-0.306536	0.0193872	0.0157895	5.07344	0.806357
gnl_Pdu_trscr_assembly_1_14069_m.67140	-1.74465	-0.303973	0.019297	0.015873	5.07344	0.806357
comp2276528_c1_seq4_m.82615	1.74507	0.789555	0.0192068	0.0159574	5.07344	0.806357
comp2272233_c0_seq1_m.72760	-1.75103	-0.290207	0.0190197	0.0160428	5.07344	0.806357
comp2274693_c0_seq1_m.78142	1.75473	0.341443	0.0189295	0.016129	5.07344	0.806357
comp2277374_c0_seq2_m.85051	1.75477	0.572235	0.0188393	0.0162162	5.07344	0.806357
comp2265897_c0_seq5_m.61166	1.75685	0.285444	0.0187491	0.0163043	5.07344	0.806357
comp2271916_c0_seq1_m.72122	1.7579	0.361252	0.0186588	0.0163934	5.07344	0.806357
comp2264302_c0_seq2_m.58699	-1.7599	-0.47277	0.0184633	0.0164835	5.07344	0.806357
comp1194322_c0_seq2_m.793	1.76066	0.307857	0.0183731	0.0165746	5.07344	0.806357
comp2143334_c0_seq2_m.7649	1.76255	0.455277	0.0182829	0.0166667	5.07344	0.806357
comp2272118_c0_seq11_m.72524	1.76796	0.459463	0.0181927	0.0167598	5.07344	0.806357
comp2280694_c0_seq1_m.91236	1.59029	0.540817	0.0252312	0.0168067	5.07344	0.806357
comp2250201_c0_seq1_m.38525	1.77376	0.278522	0.0181024	0.0168539	5.07344	0.806357
comp2257601_c0_seq2_m.48241	-1.59232	-0.238043	0.025141	0.0168776	5.07344	0.806357
comp2233700_c1_seq1_m.24550	1.77823	0.652637	0.0180122	0.0169492	5.07344	0.806357
comp2276491_c0_seq8_m.82522	-1.59499	-0.212134	0.0250508	0.0169492	5.07344	0.806357
comp2273778_c1_seq23_m.76059	1.59626	0.549518	0.0249605	0.0170213	5.07344	0.806357
comp2138952_c0_seq1_m.6867	1.78486	0.431111	0.0176485	0.0170455	5.07344	0.806357
comp2278405_c0_seq22_m.88893	1.59888	0.268683	0.0245789	0.017094	5.07344	0.806357
comp2252790_c0_seq1_m.41691	1.78533	0.569481	0.0175583	0.0171429	5.07344	0.806357
comp2276440_c0_seq2_m.82383	1.60221	0.269075	0.024391	0.0171674	5.07344	0.806357
comp2277505_c0_seq1_m.85479	1.60458	0.24168	0.0243008	0.0172414	5.07344	0.806357
comp2252746_c0_seq1_m.41651	-1.60479	-0.332494	0.0241212	0.017316	5.07344	0.806357
comp2212572_c0_seq1_m.15390	1.60963	0.246962	0.024031	0.0173913	5.07344	0.806357
comp2250982_c0_seq1_m.39507	1.61258	0.225409	0.0239408	0.0174672	5.07344	0.806357
comp2268978_c0_seq1_m.66540	1.61342	0.705356	0.0238506	0.0175439	5.07344	0.806357
comp2275358_c0_seq1_m.79627	-1.61372	-0.302412	0.023672	0.0176211	5.07344	0.806357
comp2262281_c0_seq3_m.55504	1.61453	0.284532	0.0235818	0.0176991	5.07344	0.806357
comp2267634_c0_seq2_m.64174	-1.61504	-0.448645	0.0234915	0.0177778	5.07344	0.806357
gnl_Pdu_trscr_assembly_1_16061_m.43221	-1.61912	-0.347206	0.0234013	0.0178571	5.07344	0.806357
comp2254426_c0_seq1_m.43954	-1.55964	-0.378395	0.0265329	0.0204082	5.07344	0.806357
comp2272435_c0_seq2_m.73201	1.56179	0.686155	0.0263449	0.0204918	5.07344	0.806357
comp2264888_c0_seq4_m.59493	1.56827	0.491711	0.0261673	0.0205761	5.07344	0.806357
comp2204672_c0_seq1_m.13711	-1.57401	-0.24082	0.0260771	0.0206612	5.07344	0.806357
comp2261183_c0_seq1_m.53867	1.57788	0.399266	0.0259868	0.0207469	5.07344	0.806357
comp2276593_c0_seq3_m.82791	1.58507	0.36229	0.0255188	0.0208333	5.07344	0.806357
comp2271595_c0_seq2_m.71452	1.58716	0.294292	0.0254286	0.0209205	5.07344	0.806357
comp2269580_c0_seq1_m.67656	1.50935	0.266345	0.0290742	0.0224719	5.07344	0.806357
comp2276442_c0_seq1_m.82386	-1.51266	-0.248457	0.028984	0.0225564	5.07344	0.806357
comp2279615_c0_seq1_m.91158	-1.5145	-0.222724	0.0288938	0.0226415	5.07344	0.806357
comp2266841_c0_seq1_m.62766	1.51828	0.370831	0.0288036	0.0227273	5.07344	0.806357
comp2265370_c0_seq1_m.60276	-1.52249	-0.188703	0.0286156	0.0228137	5.07344	0.806357
comp2262197_c0_seq1_m.55346	1.52691	0.434008	0.0285254	0.0229008	5.07344	0.806357
comp2205419_c0_seq2_m.13843	-1.5302	-0.312936	0.0283468	0.0229885	5.07344	0.806357
comp2275191_c1_seq2_m.79282	1.53183	0.340489	0.0282566	0.0230769	5.07344	0.806357
comp2256252_c0_seq1_m.46348	1.53512	0.816225	0.0281664	0.023166	5.07344	0.806357
comp2269110_c0_seq3_m.66810	-1.53648	-0.278859	0.0279906	0.0232558	5.07344	0.806357
comp1194106_c0_seq1_m.742	1.48463	0.233194	0.030734	0.0232975	5.07344	0.806357
comp2243933_c0_seq1_m.32211	-1.53846	-0.371631	0.0278083	0.0233463	5.07344	0.806357
comp2275933_c0_seq1_m.81045	1.48671	0.47702	0.0306438	0.0233813	5.07344	0.806357
comp1196959_c0_seq2_m.1014	1.54138	0.316104	0.027718	0.0234375	5.07344	0.806357
comp2263950_c0_seq2_m.58147	1.4868	0.43127	0.0304568	0.0234657	5.07344	0.806357
comp2274999_c0_seq4_m.78837	1.54318	0.297488	0.0276278	0.0235294	5.07344	0.806357
comp2278470_c0_seq2_m.89275	1.48686	0.558592	0.0303665	0.0235507	5.07344	0.806357
comp2271350_c0_seq18_m.70898	1.54385	0.284236	0.0275376	0.023622	5.07344	0.806357
gnl_Pdu_trscr_assembly_1_17807_m.62055	1.48772	0.242549	0.0299906	0.0236364	5.07344	0.806357
comp2256245_c0_seq1_m.46340	-1.54414	-0.319528	0.0274474	0.0237154	5.07344	0.806357
comp2265703_c0_seq1_m.60844	-1.49039	-0.39263	0.029813	0.0237226	5.07344	0.806357
comp1888169_c0_seq2_m.2479	1.49685	0.57081	0.0297227	0.0238095	5.07344	0.806357
comp2275625_c0_seq11_m.80264	-1.54655	-0.507628	0.0273571	0.0238095	5.07344	0.806357
comp2265885_c0_seq3_m.61143	1.49689	0.396259	0.0296325	0.0238971	5.07344	0.806357
comp2270385_c0_seq11_m.69105	1.54787	0.355853	0.0272669	0.0239044	5.07344	0.806357
comp2265471_c0_seq5_m.60488	1.49843	0.27683	0.0295423	0.0239852	5.07344	0.806357
gnl_Pdu_trscr_assembly_1_18157_m.24773	1.55055	0.334311	0.0271767	0.024	5.07344	0.806357
comp2278554_c0_seq4_m.90013	-1.43226	-0.307018	0.0333853	0.024055	5.07344	0.806357
comp2275822_c0_seq10_m.80745	-1.49934	-0.344392	0.0294521	0.0240741	5.07344	0.806357
comp2276498_c2_seq1_m.82546	-1.5527	-0.353236	0.0270009	0.0240964	5.07344	0.806357
comp2277945_c0_seq2_m.86985	1.43313	0.611323	0.0332951	0.0241379	5.07344	0.806357
comp1326513_c0_seq1_m.1923	-1.50673	-0.401512	0.0293618	0.0241636	5.07344	0.806357
comp1876805_c0_seq1_m.2339	1.55413	0.272787	0.0269107	0.0241935	5.07344	0.806357
comp2231610_c0_seq1_m.23229	1.44212	0.257633	0.0329323	0.0242215	5.07344	0.806357
comp2211270_c0_seq1_m.14951	1.50798	0.392113	0.0292716	0.0242537	5.07344	0.806357
comp2274301_c0_seq6_m.77327	1.55543	0.36748	0.0268205	0.0242915	5.07344	0.806357
comp2263691_c0_seq2_m.57661	-1.44484	-0.330295	0.0325658	0.0243056	5.07344	0.806357
comp2263612_c1_seq1_m.57550	-1.44978	-0.2293	0.0323008	0.0243902	5.07344	0.806357
comp2276314_c0_seq1_m.82075	1.556	0.47035	0.0267303	0.0243902	5.07344	0.806357
comp2261150_c0_seq1_m.53829	1.45179	0.341381	0.0321053	0.0244755	5.07344	0.806357
comp2242407_c0_seq1_m.30845	1.46184	0.461694	0.0318421	0.0245614	5.07344	0.806357
comp1961272_c0_seq1_m.3584	1.46203	0.437656	0.0317519	0.0246479	5.07344	0.806357
comp2271419_c1_seq1_m.71009	1.46417	0.538368	0.0316617	0.024735	5.07344	0.806357
comp2268194_c0_seq1_m.65186	-1.46937	-0.334678	0.0314746	0.0248227	5.07344	0.806357
comp2272782_c0_seq2_m.73955	-1.46962	-0.359312	0.0313844	0.024911	5.07344	0.806357
comp2278480_c1_seq1_m.89333	1.47857	0.268466	0.0311081	0.025	5.07344	0.806357
comp2271381_c1_seq12_m.70942	1.381	0.213516	0.0366964	0.0254777	5.07344	0.806357
comp2271944_c0_seq11_m.72172	1.38618	0.360527	0.0366062	0.0255591	5.07344	0.806357
comp2261362_c0_seq2_m.54116	1.38637	0.572988	0.036516	0.025641	5.07344	0.806357
comp2275110_c1_seq5_m.79090	-1.38643	-0.207125	0.0364258	0.0257235	5.07344	0.806357
comp2271637_c0_seq1_m.71562	1.38736	0.309132	0.0363355	0.0258065	5.07344	0.806357
comp2263983_c0_seq1_m.58208	1.38838	0.214247	0.0360724	0.02589	5.07344	0.806357
comp2269023_c0_seq1_m.66650	1.3885	0.196538	0.0359821	0.025974	5.07344	0.806357
comp2279450_c0_seq1_m.91124	1.38956	0.278123	0.0358919	0.0260586	5.07344	0.806357
comp2260797_c0_seq1_m.53088	-1.38965	-0.199381	0.0358017	0.0261438	5.07344	0.806357
comp2273813_c0_seq2_m.76128	1.3899	0.251123	0.0357115	0.0262295	5.07344	0.806357
comp2280482_c0_seq1_m.91228	-1.39004	-0.30332	0.0356212	0.0263158	5.07344	0.806357
comp2251386_c0_seq2_m.40044	-1.39047	-0.300488	0.035531	0.0264026	5.07344	0.806357
gnl_Pdu_trscr_assembly_1_7964_m.49648	1.39118	0.264763	0.035343	0.0264901	5.07344	0.806357
comp2266882_c0_seq1_m.62832	1.39416	0.335721	0.0352528	0.0265781	5.07344	0.806357
comp2277722_c0_seq17_m.86189	-1.39898	-0.261098	0.0351626	0.0266667	5.07344	0.806357
comp2253217_c0_seq2_m.42336	-1.41426	-0.284399	0.03439	0.0267559	5.07344	0.806357
comp2265328_c0_seq2_m.60206	-1.41724	-0.290747	0.0342998	0.0268456	5.07344	0.806357
comp2268225_c0_seq5_m.65245	1.41795	0.445296	0.0342096	0.026936	5.07344	0.806357
comp2269593_c0_seq3_m.67692	1.42119	0.240112	0.0341194	0.027027	5.07344	0.806357
comp2246514_c1_seq1_m.34691	-1.42316	-0.278689	0.0340291	0.0271186	5.07344	0.806357
comp2277142_c0_seq6_m.84365	1.42472	0.326729	0.0339389	0.0272109	5.07344	0.806357
comp2274537_c0_seq28_m.77857	-1.35047	-0.290341	0.0398233	0.0272727	5.07344	0.806357
comp2265464_c0_seq1_m.60472	-1.42509	-0.432868	0.0338487	0.0273038	5.07344	0.806357
comp2253516_c0_seq4_m.42708	1.35166	0.329022	0.0397331	0.0273556	5.07344	0.806357
comp2253077_c0_seq1_m.42045	1.428	0.182006	0.0336711	0.0273973	5.07344	0.806357
comp2271535_c0_seq1_m.71319	1.35397	0.245324	0.0395461	0.027439	5.07344	0.806357
comp2275406_c1_seq7_m.79751	1.35668	0.21831	0.039078	0.0275229	5.07344	0.806357
comp2271675_c0_seq2_m.71655	1.35721	0.400977	0.0389878	0.0276074	5.07344	0.806357
comp2247821_c0_seq5_m.35979	1.35849	0.304913	0.0388102	0.0276923	5.07344	0.806357
gi_613484551	1.35885	0.398838	0.0386316	0.0277778	5.07344	0.806357
comp2272491_c1_seq4_m.73302	-1.36345	-0.252758	0.0379934	0.0278638	5.07344	0.806357
comp2254568_c0_seq1_m.44123	-1.36609	-0.278329	0.0379032	0.0279503	5.07344	0.806357
comp2139380_c0_seq1_m.6935	1.36612	0.362171	0.037813	0.0280374	5.07344	0.806357
comp2273519_c1_seq9_m.75533	1.36721	0.457484	0.0377227	0.028125	5.07344	0.806357
comp2248291_c0_seq1_m.36455	-1.36844	-0.228245	0.0375357	0.0282132	5.07344	0.806357
comp2276173_c0_seq1_m.81727	1.3704	0.232616	0.0373487	0.0283019	5.07344	0.806357
comp2271802_c0_seq1_m.71876	-1.37249	-0.213228	0.0372585	0.0283912	5.07344	0.806357
comp2278363_c0_seq7_m.88713	-1.37673	-0.252093	0.0371682	0.028481	5.07344	0.806357
comp2269793_c0_seq1_m.68039	1.37952	0.320384	0.0369812	0.0285714	5.07344	0.806357
comp2276295_c0_seq1_m.82012	-1.34698	-0.447817	0.0403158	0.0286145	5.07344	0.806357
comp2278485_c0_seq1_m.89371	1.34876	0.327131	0.0400207	0.0287009	5.07344	0.806357
comp2278509_c0_seq8_m.89637	1.3446	0.262551	0.0405827	0.03003	5.07344	0.806357
comp2266869_c0_seq1_m.62813	1.30797	0.230491	0.044359	0.0317919	5.07344	0.806357
comp2272882_c0_seq14_m.74184	-1.31229	-0.467262	0.0440056	0.0318841	5.07344	0.806357
comp2265255_c2_seq1_m.60100	1.31253	0.365034	0.0437331	0.0319767	5.07344	0.806357
comp2246502_c0_seq1_m.34680	-1.31311	-0.225713	0.0432697	0.03207	5.07344	0.806357
comp2250281_c0_seq1_m.38657	-1.31905	-0.183583	0.042812	0.0321637	5.07344	0.806357
comp1769718_c0_seq1_m.2239	1.32106	0.267138	0.0427218	0.0322581	5.07344	0.806357
comp2269345_c0_seq1_m.67253	1.32363	0.255742	0.0425348	0.0323529	5.07344	0.806357
comp2260960_c0_seq2_m.53456	1.3254	0.457768	0.0423562	0.0324484	5.07344	0.806357
comp2277311_c0_seq3_m.84858	1.32623	0.385683	0.0421607	0.0325444	5.07344	0.806357
comp2269698_c0_seq1_m.67864	1.33299	0.244548	0.0416006	0.0326409	5.07344	0.806357
comp2273142_c0_seq1_m.74744	-1.33314	-0.353397	0.0415103	0.0327381	5.07344	0.806357
comp2277134_c1_seq4_m.84342	1.33428	0.238794	0.0413233	0.0328358	5.07344	0.806357
comp2236992_c0_seq1_m.26663	-1.3398	-0.247224	0.0407622	0.0329341	5.07344	0.806357
comp2278222_c0_seq3_m.88116	-1.265	-0.203818	0.0482942	0.032967	5.07344	0.806357
gnl_Pdu_trscr_assembly_1_20792_m.71829	1.26975	0.165296	0.0480094	0.0330579	5.07344	0.806357
comp2275266_c0_seq21_m.79421	-1.27384	-0.249978	0.0475536	0.0331492	5.07344	0.806357
comp2257282_c0_seq1_m.47769	-1.27953	-0.186951	0.0470977	0.033241	5.07344	0.806357
comp2273576_c0_seq1_m.75622	1.28026	0.281134	0.0470075	0.0333333	5.07344	0.806357
comp2269326_c0_seq2_m.67220	-1.282	-0.218653	0.0465404	0.0334262	5.07344	0.806357
comp2267483_c0_seq3_m.63903	-1.28348	-0.306637	0.0463534	0.0335196	5.07344	0.806357
comp2277075_c0_seq2_m.84155	1.28706	0.236211	0.0462632	0.0336134	5.07344	0.806357
comp2272920_c0_seq1_m.74280	1.288	0.306478	0.0461729	0.0337079	5.07344	0.806357
comp2265462_c0_seq5_m.60462	-1.28936	-0.242204	0.0458929	0.0338028	5.07344	0.806357
comp2222959_c0_seq1_m.19328	-1.28939	-0.440218	0.0458026	0.0338983	5.07344	0.806357
comp2276743_c0_seq1_m.83169	1.29041	0.248888	0.0457124	0.0339943	5.07344	0.806357
comp2264121_c0_seq1_m.58459	1.29075	0.470334	0.0456222	0.0340909	5.07344	0.806357
comp2273628_c0_seq6_m.75728	-1.29446	-0.331068	0.045359	0.034188	5.07344	0.806357
comp2237053_c0_seq1_m.26700	1.2954	0.288055	0.0452688	0.0342857	5.07344	0.806357
comp2262887_c0_seq1_m.56477	1.29909	0.24049	0.0448929	0.034384	5.07344	0.806357
comp2276719_c0_seq5_m.83124	-1.30063	-0.324302	0.0448026	0.0344828	5.07344	0.806357
comp2277847_c1_seq10_m.86637	-1.30579	-0.491364	0.0446269	0.0345821	5.07344	0.806357
comp2272182_c0_seq2_m.72649	1.25896	0.288855	0.0489239	0.0356164	5.07344	0.806357
comp2197446_c0_seq1_m.12404	1.22481	0.225806	0.0517415	0.0368421	5.07344	0.806357
comp2277816_c0_seq2_m.86536	-1.22802	-0.259176	0.0516513	0.0369393	5.07344	0.806357
comp2275833_c0_seq1_m.80771	-1.22852	-0.325062	0.0515611	0.037037	5.07344	0.806357
comp2271667_c0_seq1_m.71637	1.22894	0.194726	0.0514709	0.0371353	5.07344	0.806357
comp2276202_c0_seq3_m.81780	1.23038	0.307446	0.0513806	0.037234	5.07344	0.806357
comp2271906_c0_seq1_m.72107	1.23232	0.251289	0.051203	0.0373333	5.07344	0.806357
comp2258349_c0_seq1_m.49321	-1.23435	-0.173944	0.0511128	0.0374332	5.07344	0.806357
comp2269738_c0_seq1_m.67939	-1.23465	-0.188767	0.0510226	0.0375335	5.07344	0.806357
comp2266233_c0_seq1_m.61658	1.23645	0.479449	0.0509323	0.0376344	5.07344	0.806357
comp2237757_c0_seq1_m.27251	1.2401	0.182512	0.0506598	0.0377358	5.07344	0.806357
comp2271044_c0_seq1_m.70310	-1.24156	-0.186116	0.050484	0.0378378	5.07344	0.806357
comp2262300_c0_seq2_m.55547	1.24425	0.189052	0.050297	0.0379404	5.07344	0.806357
comp2107035_c0_seq2_m.6021	-1.24543	-0.218019	0.0501015	0.0380435	5.07344	0.806357
comp2275759_c0_seq17_m.80560	-1.24935	-0.168965	0.0498289	0.0381471	5.07344	0.806357
comp2262441_c0_seq1_m.55760	-1.25324	-0.212214	0.0491898	0.0382514	5.07344	0.806357
comp2268336_c0_seq2_m.65472	-1.22066	-0.148858	0.0522124	0.039267	5.07344	0.806357
comp2277605_c1_seq7_m.85828	1.22391	0.339101	0.0521222	0.0393701	5.07344	0.806357
comp2274096_c1_seq4_m.76855	1.20694	0.325297	0.0534887	0.0412371	5.07344	0.806357
comp2258806_c0_seq1_m.49958	1.21318	0.36882	0.0531165	0.0413437	5.07344	0.806357
comp2257781_c0_seq1_m.48513	1.21348	0.33747	0.0530263	0.0414508	5.07344	0.806357
comp2278133_c0_seq3_m.87701	1.21354	0.23238	0.0529361	0.0415584	5.07344	0.806357
comp2254167_c0_seq1_m.43587	1.21361	0.230195	0.0528459	0.0416667	5.07344	0.806357
comp2268443_c0_seq2_m.65634	1.21709	0.223702	0.052391	0.0417755	5.07344	0.806357
comp2232641_c0_seq7_m.23875	-1.20554	-0.185692	0.0536645	0.0437018	5.07344	0.806357
comp2277759_c0_seq3_m.86312	1.18688	0.260687	0.0557312	0.0452261	5.07344	0.806357
comp2278536_c1_seq38_m.89884	1.18729	0.233617	0.055641	0.0453401	5.07344	0.806357
comp2276743_c1_seq1_m.83170	1.1875	0.213401	0.0555508	0.0454545	5.07344	0.806357
comp2271909_c0_seq2_m.72111	-1.1265	-0.210983	0.0630695	0.0455635	5.07344	0.806357
comp2263822_c0_seq1_m.57945	1.19103	0.212423	0.0551983	0.0455696	5.07344	0.806357
comp1785956_c0_seq1_m.2259	1.13257	0.295908	0.0623195	0.0456731	5.07344	0.806357
comp2266755_c0_seq1_m.62616	1.19178	0.461466	0.0551081	0.0456853	5.07344	0.806357
comp2262185_c0_seq1_m.55318	1.13986	0.526565	0.0616974	0.0457831	5.07344	0.806357
comp2072973_c0_seq1_m.5296	1.19325	0.245746	0.0549305	0.0458015	5.07344	0.806357
comp2276412_c0_seq1_m.82311	-1.14268	-0.163569	0.0612519	0.0458937	5.07344	0.806357
comp2228430_c0_seq1_m.21640	1.19327	0.243917	0.0548402	0.0459184	5.07344	0.806357
comp2271783_c0_seq2_m.71842	-1.15514	-0.183796	0.0598637	0.0460048	5.07344	0.806357
comp2265386_c0_seq2_m.60299	1.19482	0.18319	0.0545771	0.0460358	5.07344	0.806357
comp2268417_c0_seq2_m.65592	-1.15519	-0.19225	0.0597735	0.0461165	5.07344	0.806357
comp2275153_c0_seq1_m.79199	1.19854	0.18748	0.0543102	0.0461538	5.07344	0.806357
comp2220386_c0_seq1_m.18230	1.15563	0.15838	0.0596833	0.0462287	5.07344	0.806357
comp1226347_c0_seq1_m.1231	1.15582	0.25778	0.059593	0.0463415	5.07344	0.806357
comp2004487_c0_seq1_m.4269	1.16595	0.324775	0.0587274	0.0464548	5.07344	0.806357
comp2270845_c1_seq1_m.69967	1.17068	0.270023	0.0581974	0.0465686	5.07344	0.806357
comp2278161_c0_seq3_m.87805	1.17093	0.222083	0.0579229	0.046683	5.07344	0.806357
comp2272842_c0_seq2_m.74081	-1.17211	-0.401972	0.0577472	0.046798	5.07344	0.806357
comp2278362_c0_seq1_m.88712	-1.17337	-0.211725	0.0574539	0.0469136	5.07344	0.806357
comp2263909_c0_seq2_m.58087	1.17456	0.146768	0.0573637	0.0470297	5.07344	0.806357
comp2267341_c0_seq1_m.63653	-1.17582	-0.18717	0.0571767	0.0471464	5.07344	0.806357
comp2277313_c0_seq3_m.84866	1.1787	0.31387	0.0569023	0.0472637	5.07344	0.806357
comp2232290_c0_seq2_m.23637	1.18204	0.287455	0.0566259	0.0473815	5.07344	0.806357
comp2268857_c0_seq2_m.66328	-1.18251	-0.213453	0.0563628	0.0475	5.07344	0.806357
gnl_Pdu_trscr_assembly_1_1986_m.5698	-1.12025	-0.307699	0.0648017	0.0475059	5.07344	0.806357
comp2276166_c0_seq8_m.81705	1.18358	0.325937	0.056187	0.047619	5.07344	0.806357
gnl_Pdu_trscr_assembly_1_1213_m.70099	-1.1235	-0.167995	0.0640977	0.047619	5.07344	0.806357
gnl_Pdu_trscr_assembly_1_9334_m.28552	1.12381	0.21155	0.0640075	0.0477327	5.07344	0.806357
comp2234837_c0_seq1_m.25285	1.12389	0.202417	0.0639173	0.0478469	5.07344	0.806357
comp2266473_c1_seq14_m.62086	-1.11604	-0.231998	0.0658355	0.049763	5.07344	0.806357
comp2273216_c0_seq3_m.74900	1.09848	0.157002	0.0686203	0.0537383	5.07344	0.806357
comp2277982_c0_seq2_m.87136	1.10123	0.227784	0.0684417	0.0538642	5.07344	0.806357
comp2269230_c0_seq2_m.67055	-1.10236	-0.212486	0.0683515	0.0539906	5.07344	0.806357
comp2271636_c1_seq22_m.71557	-1.10493	-0.169192	0.0680789	0.0541176	5.07344	0.806357
comp2260519_c0_seq10_m.52611	-1.10847	-0.211364	0.0675019	0.0542453	5.07344	0.806357
comp2275295_c1_seq2_m.79482	1.11235	0.441741	0.06686	0.0543735	5.07344	0.806357
comp2269029_c1_seq11_m.66661	-1.09042	-0.141217	0.0700818	0.055814	5.07344	0.806357
comp2265589_c0_seq2_m.60673	-1.09195	-0.142647	0.069812	0.0559441	5.07344	0.806357
comp2252186_c0_seq3_m.40915	-1.08565	-0.357718	0.0707284	0.0578704	5.07344	0.806357
comp2202068_c0_seq1_m.13304	-1.08598	-0.195375	0.0705414	0.0580046	5.07344	0.806357
comp2265735_c0_seq4_m.60895	-1.07995	-0.129051	0.0718543	0.0597701	5.07344	0.806357
comp2262927_c0_seq2_m.56544	1.07997	0.226289	0.0717641	0.0599078	5.07344	0.806357
comp2254668_c0_seq2_m.44236	1.08159	0.196326	0.0714887	0.0600462	5.07344	0.806357
comp2268391_c0_seq1_m.65566	-1.07545	-0.183914	0.0727735	0.0637813	5.07344	0.806357
comp2132126_c0_seq4_m.6558	1.07567	0.268524	0.0726833	0.0639269	5.07344	0.806357
comp2268473_c1_seq1_m.65668	1.07603	0.346449	0.0724962	0.0640732	5.07344	0.806357
comp2275478_c0_seq7_m.79935	1.07633	0.226491	0.072406	0.0642202	5.07344	0.806357
comp2141952_c0_seq1_m.7380	1.05628	0.190241	0.0754211	0.0653153	5.07344	0.806357
comp2254376_c0_seq1_m.43911	1.06337	0.183542	0.0746147	0.0654628	5.07344	0.806357
comp2253149_c0_seq1_m.42245	1.06412	0.255472	0.0744323	0.0656109	5.07344	0.806357
comp2276031_c0_seq51_m.81296	1.06526	0.288154	0.0742538	0.0657596	5.07344	0.806357
comp2234282_c0_seq1_m.24908	1.06664	0.237342	0.0740658	0.0659091	5.07344	0.806357
comp2267169_c0_seq1_m.63315	-1.04908	-0.182622	0.0763224	0.0669643	5.07344	0.806357
comp2278238_c0_seq6_m.88188	1.05045	0.202995	0.0761353	0.0671141	5.07344	0.806357
comp2274246_c0_seq1_m.77191	-1.05204	-0.329852	0.0759577	0.0672646	5.07344	0.806357
comp2272559_c0_seq1_m.73440	-1.05282	-0.186696	0.0757791	0.0674157	5.07344	0.806357
comp2246119_c0_seq1_m.34306	1.04036	0.220869	0.0781447	0.0684327	5.07344	0.806357
comp2259823_c0_seq1_m.51564	1.04243	0.208869	0.0777829	0.0685841	5.07344	0.806357
comp2265883_c1_seq1_m.61140	1.04243	0.32009	0.0776927	0.0687361	5.07344	0.806357
comp2263277_c0_seq1_m.57091	-1.04297	-0.175761	0.0775141	0.0688889	5.07344	0.806357
comp2269906_c0_seq2_m.68214	-1.04424	-0.250685	0.0772528	0.0690423	5.07344	0.806357
comp2265494_c0_seq1_m.60519	1.0328	0.289166	0.0799727	0.069869	5.07344	0.806357
comp2254394_c0_seq2_m.43926	-1.03516	-0.184238	0.0797951	0.0700219	5.07344	0.806357
comp2227117_c0_seq2_m.21047	1.03588	0.345485	0.0794323	0.0701754	5.07344	0.806357
comp2276160_c0_seq4_m.81678	-1.03833	-0.261501	0.0786015	0.0703297	5.07344	0.806357
comp2274258_c1_seq4_m.77217	-1.03936	-0.168003	0.0784239	0.0704846	5.07344	0.806357
comp2266500_c0_seq1_m.62123	-1.02631	-0.279798	0.0812538	0.0712743	5.07344	0.806357
comp2276968_c0_seq3_m.83862	1.02885	0.22388	0.0808158	0.0714286	5.07344	0.806357
comp2254566_c0_seq1_m.44122	-1.02962	-0.160934	0.0806184	0.0715835	5.07344	0.806357
comp2251594_c0_seq1_m.40214	-1.03027	-0.161016	0.0803327	0.0717391	5.07344	0.806357
comp2262720_c0_seq1_m.56199	1.03081	0.244124	0.0802425	0.0718954	5.07344	0.806357
comp2272319_c0_seq24_m.72950	1.02441	0.179327	0.0821842	0.0731183	5.07344	0.806357
comp2251866_c0_seq1_m.40557	-1.02513	-0.148194	0.0819107	0.0732759	5.07344	0.806357
comp2245687_c1_seq1_m.33822	1.02417	0.350199	0.0825489	0.0751073	5.07344	0.806357
comp2274888_c0_seq2_m.78557	1.02297	0.243101	0.0829239	0.0770878	5.07344	0.806357
comp1896477_c0_seq1_m.2604	-1.01792	-0.235719	0.0845113	0.0790598	5.07344	0.806357
comp2262137_c0_seq4_m.55246	1.01664	0.380278	0.0852002	0.0831557	5.07344	0.806357
comp2263073_c0_seq1_m.56786	1.00043	0.228618	0.0890517	0.0863158	5.07344	0.806357
comp2274262_c0_seq1_m.77231	1.00667	0.270091	0.0875056	0.0864979	5.07344	0.806357
comp2278390_c0_seq1_m.88826	1.00763	0.158374	0.0872199	0.0866808	5.07344	0.806357
comp2272583_c0_seq2_m.73488	-1.00896	-0.135136	0.0868571	0.0868644	5.07344	0.806357
comp2234079_c0_seq2_m.24745	1.00944	0.220636	0.0867669	0.0870488	5.07344	0.806357
comp2247176_c0_seq3_m.35337	-1.00974	-0.227997	0.0866767	0.087234	5.07344	0.806357
comp2272961_c0_seq1_m.74370	0.994379	0.180945	0.0905263	0.0922432	5.07344	0.806357
comp2256095_c0_seq1_m.46136	-0.994853	-0.175392	0.0904361	0.092437	5.07344	0.806357
comp2263921_c0_seq2_m.58101	0.992124	0.261239	0.0914549	0.0941423	5.07344	0.806357
comp2279235_c0_seq1_m.91078	-0.991305	-0.22408	0.0917256	0.0960334	5.07344	0.806357
comp2241992_c0_seq1_m.30524	0.965245	0.188301	0.0979831	0.0969072	5.07344	0.806357
comp2274238_c3_seq9_m.77182	-0.973061	-0.172683	0.0958534	0.0971074	5.07344	0.806357
comp2270085_c0_seq9_m.68531	0.981521	0.224446	0.0941927	0.0973085	5.07344	0.806357
comp2279272_c0_seq1_m.91086	0.982628	0.168836	0.0939267	0.0975104	5.07344	0.806357
comp1194343_c0_seq1_m.800	-0.98486	-0.137788	0.0932857	0.0977131	5.07344	0.806357
comp2276747_c1_seq2_m.83192	0.985073	0.244425	0.0931081	0.0979167	5.07344	0.806357

## Sheet: IM_NM vs M_NM_Female
	d	logFC	pvalue	FDR	Z	R
comp1194106_c0_seq1_m.742	1.5837	0.324794	0.0196861	0	5.58787	0.793941
comp1194294_c0_seq1_m.785	1.86349	0.409797	0.0137058	0	5.58787	0.793941
comp1194362_c0_seq2_m.804	1.59064	0.340174	0.0195959	0	5.58787	0.793941
comp1781461_c0_seq1_m.2253	-1.96702	-0.553461	0.0114558	0	5.58787	0.793941
comp1838578_c0_seq1_m.2293	2.41113	0.815403	0.00550376	0	5.58787	0.793941
comp1945561_c0_seq2_m.3380	-2.60921	-0.812746	0.0035188	0	5.58787	0.793941
comp1953876_c0_seq1_m.3493	1.67504	0.470707	0.0181372	0	5.58787	0.793941
comp1958245_c0_seq1_m.3536	-1.9404	-0.364706	0.0120818	0	5.58787	0.793941
comp1965369_c0_seq1_contamination_m.3664	1.73243	0.543254	0.0167763	0	5.58787	0.793941
comp2004487_c0_seq1_m.4269	2.30362	0.782641	0.00622556	0	5.58787	0.793941
comp2139115_c0_seq1_m.6894	-1.66608	-0.72447	0.0182274	0	5.58787	0.793941
comp2142866_c0_seq1_m.7576	1.58101	0.489085	0.0198665	0	5.58787	0.793941
comp2189372_c0_seq1_m.11219	-1.7305	-0.327127	0.0171372	0	5.58787	0.793941
comp2201786_c0_seq1_m.13247	1.7907	0.827873	0.0154276	0	5.58787	0.793941
comp2204672_c0_seq1_m.13711	-2.11109	-0.43197	0.00911278	0	5.58787	0.793941
comp2205419_c0_seq2_m.13843	-1.85003	-0.500687	0.0139765	0	5.58787	0.793941
comp2229729_c0_seq1_m.22264	2.0613	0.464306	0.00965226	0	5.58787	0.793941
comp2232290_c0_seq2_m.23637	-2.65648	-0.964432	0.00315789	0	5.58787	0.793941
comp2232909_c0_seq1_m.24034	1.92759	0.555905	0.0122622	0	5.58787	0.793941
comp2234282_c0_seq1_m.24908	3.70735	0.945862	0.00081203	0	5.58787	0.793941
comp2236614_c0_seq1_m.26450	-2.14409	-0.691934	0.00857143	0	5.58787	0.793941
comp2237468_c0_seq1_m.27022	-3.44521	-1.21225	0.00117293	0	5.58787	0.793941
comp2239691_c0_seq1_m.28548	-2.29181	-0.844081	0.00631579	0	5.58787	0.793941
comp2242282_c0_seq1_m.30761	-1.57918	-0.376363	0.0199568	0	5.58787	0.793941
comp2242933_c0_seq1_m.31351	7.24933	1.62584	9.02256e-05	0	5.58787	0.793941
comp2244968_c0_seq1_m.33120	1.75306	0.636948	0.0161485	0	5.58787	0.793941
comp2245721_c0_seq1_m.33844	1.86819	0.533661	0.0135254	0	5.58787	0.793941
comp2246514_c1_seq1_m.34691	-2.04892	-0.510103	0.00992293	0	5.58787	0.793941
comp2247988_c0_seq1_m.36173	-5.12738	-1.21037	0.000451128	0	5.58787	0.793941
comp2248808_c0_seq2_m.37043	-1.82472	-0.933838	0.0147058	0	5.58787	0.793941
comp2248821_c1_seq2_m.37050	-1.90423	-0.387761	0.0127133	0	5.58787	0.793941
comp2252285_c0_seq2_m.41107	-1.7428	-0.449519	0.0164192	0	5.58787	0.793941
comp2252847_c0_seq1_m.41763	1.99855	0.437285	0.010734	0	5.58787	0.793941
comp2253149_c0_seq1_m.42245	1.80443	0.51881	0.0149765	0	5.58787	0.793941
comp2253516_c0_seq4_m.42708	-2.0524	-0.96492	0.00983271	0	5.58787	0.793941
comp2254167_c0_seq1_m.43587	2.81933	0.816422	0.00243609	0	5.58787	0.793941
comp2254206_c0_seq1_m.43646	1.84739	0.407674	0.014157	0	5.58787	0.793941
comp2254470_c0_seq1_m.44006	-1.98063	-0.413199	0.0111852	0	5.58787	0.793941
comp2254477_c0_seq1_m.44015	1.61399	0.41501	0.0189492	0	5.58787	0.793941
comp2254520_c0_seq1_m.44059	-2.50843	-0.550285	0.00406015	0	5.58787	0.793941
comp2254641_c1_seq1_m.44200	-2.28479	-0.462842	0.00649624	0	5.58787	0.793941
comp2256041_c0_seq1_m.46046	3.95979	0.990119	0.000721805	0	5.58787	0.793941
comp2256095_c0_seq1_m.46136	-1.83769	-0.473988	0.0144352	0	5.58787	0.793941
comp2256220_c0_seq1_m.46316	-2.45281	-0.655229	0.00487218	0	5.58787	0.793941
comp2257905_c0_seq1_m.48664	-2.2762	-0.555613	0.00676692	0	5.58787	0.793941
comp2258554_c0_seq1_m.49568	-2.49874	-0.502591	0.00415038	0	5.58787	0.793941
comp2259221_c0_seq1_m.50687	2.32901	0.501321	0.00604511	0	5.58787	0.793941
comp2260103_c0_seq1_m.51994	-1.59464	-0.343177	0.0195056	0	5.58787	0.793941
comp2261018_c0_seq2_m.53614	-1.60095	-0.360074	0.0192199	0	5.58787	0.793941
comp2261368_c1_seq1_m.54120	-1.68152	-0.344379	0.0179568	0	5.58787	0.793941
comp2261379_c0_seq1_m.54133	-2.21988	-0.72571	0.00712782	0	5.58787	0.793941
comp2261399_c0_seq2_m.54155	-3.43523	-1.20022	0.00126316	0	5.58787	0.793941
comp2261623_c0_seq1_m.54431	-2.68606	-0.722675	0.00288722	0	5.58787	0.793941
comp2262137_c0_seq3_m.92268	-3.45094	-1.32985	0.00108271	0	5.58787	0.793941
comp2262137_c0_seq4_m.55246	-4.67388	-0.974628	0.000541353	0	5.58787	0.793941
comp2262281_c0_seq3_m.55504	-2.28798	-0.66329	0.00640602	0	5.58787	0.793941
comp2262317_c0_seq2_m.55577	2.34666	0.646417	0.00586466	0	5.58787	0.793941
comp2262339_c0_seq1_m.55609	1.70271	0.375641	0.0176786	0	5.58787	0.793941
comp2262465_c0_seq5_m.55795	-2.44087	-1.06271	0.00514286	0	5.58787	0.793941
comp2263011_c0_seq1_m.56689	3.19465	0.76464	0.00144361	0	5.58787	0.793941
comp2263115_c0_seq2_m.56831	2.6749	0.450848	0.00297744	0	5.58787	0.793941
comp2263277_c0_seq1_m.57091	-2.08011	-0.457666	0.00938158	0	5.58787	0.793941
comp2263291_c0_seq2_m.57114	2.89754	0.741387	0.00234586	0	5.58787	0.793941
comp2263346_c1_seq31_m.57192	-1.87538	-0.392806	0.0133449	0	5.58787	0.793941
comp2263612_c1_seq1_m.57550	-2.45735	-0.487029	0.00478195	0	5.58787	0.793941
comp2263667_c0_seq1_m.57601	1.99008	0.607217	0.0110047	0	5.58787	0.793941
comp2263691_c0_seq2_m.57661	-1.5682	-0.482573	0.0201372	0	5.58787	0.793941
comp2263822_c0_seq1_m.57945	2.47284	0.784272	0.0046015	0	5.58787	0.793941
comp2263873_c0_seq9_m.58029	-2.4874	-1.00052	0.00433083	0	5.58787	0.793941
comp2263896_c0_seq3_m.58065	2.00238	0.412334	0.0106438	0	5.58787	0.793941
comp2263928_c0_seq2_m.58107	2.35588	0.67947	0.00559398	0	5.58787	0.793941
comp2264302_c0_seq2_m.58699	-2.17222	-0.689081	0.0077594	0	5.58787	0.793941
comp2264621_c0_seq1_m.59138	-1.90432	-0.550996	0.0126231	0	5.58787	0.793941
comp2264838_c0_seq3_m.59436	-2.65557	-0.962981	0.00324812	0	5.58787	0.793941
comp2264888_c0_seq4_m.59493	1.62174	0.605577	0.018859	0	5.58787	0.793941
comp2265049_c0_seq3_m.59764	1.90762	0.616213	0.0124427	0	5.58787	0.793941
comp2265326_c0_seq3_m.60204	-2.81382	-0.773929	0.00252632	0	5.58787	0.793941
comp2265386_c0_seq2_m.60299	1.98891	0.648734	0.0110949	0	5.58787	0.793941
comp2265494_c0_seq1_m.60519	1.55989	0.569482	0.0203148	0	5.58787	0.793941
comp2265656_c0_seq3_m.60780	-1.88781	-0.451262	0.0128938	0	5.58787	0.793941
comp2265735_c0_seq4_m.60895	-1.79133	-0.304774	0.0153374	0	5.58787	0.793941
comp2265768_c0_seq2_m.60943	-2.19247	-0.691719	0.0073985	0	5.58787	0.793941
comp2265883_c1_seq1_m.61140	1.88376	0.679826	0.0130742	0	5.58787	0.793941
comp2265885_c0_seq3_m.61143	-1.88833	-0.465247	0.0128036	0	5.58787	0.793941
comp2265897_c0_seq5_m.61166	3.29543	0.678971	0.00135338	0	5.58787	0.793941
comp2266171_c0_seq1_m.61557	2.49236	0.6359	0.0042406	0	5.58787	0.793941
comp2266280_c0_seq1_m.61789	3.5251	0.876584	0.000992481	0	5.58787	0.793941
comp2266503_c0_seq6_m.62129	-1.7332	-0.48956	0.0166861	0	5.58787	0.793941
comp2266507_c0_seq10_m.62138	-2.28191	-0.438646	0.00658647	0	5.58787	0.793941
comp2266512_c0_seq8_m.62145	1.97752	0.385478	0.0112754	0	5.58787	0.793941
comp2266692_c0_seq1_m.62504	2.16684	0.580346	0.0081203	0	5.58787	0.793941
comp2267172_c0_seq1_m.63318	1.75264	0.398502	0.0162387	0	5.58787	0.793941
comp2267209_c0_seq1_m.63399	-2.26837	-0.551372	0.00685714	0	5.58787	0.793941
comp2267341_c0_seq1_m.63653	2.35097	0.463399	0.00577444	0	5.58787	0.793941
comp2267732_c0_seq2_m.64331	-2.01	-0.489041	0.0103731	0	5.58787	0.793941
comp2268441_c0_seq1_m.65632	2.14551	0.788596	0.00839098	0	5.58787	0.793941
comp2268473_c1_seq1_m.65668	3.03694	1.06345	0.00198496	0	5.58787	0.793941
comp2268798_c0_seq2_m.66233	1.82235	0.563279	0.0147961	0	5.58787	0.793941
comp2268892_c0_seq1_m.66381	-2.56506	-0.972024	0.00360902	0	5.58787	0.793941
comp2269060_c0_seq1_m.66718	-2.07678	-0.690607	0.00956203	0	5.58787	0.793941
comp2269060_c1_seq1_m.66719	-2.44084	-0.921705	0.00523308	0	5.58787	0.793941
comp2269158_c0_seq1_m.66914	1.58196	0.353173	0.0197763	0	5.58787	0.793941
comp2269171_c0_seq3_m.66933	2.55786	0.824384	0.00369925	0	5.58787	0.793941
comp2269185_c0_seq2_m.66963	-2.92901	-0.633123	0.00225564	0	5.58787	0.793941
comp2269230_c0_seq2_m.67055	-1.92211	-0.478116	0.0123524	0	5.58787	0.793941
comp2269297_c0_seq2_m.67181	1.97174	0.680212	0.0113656	0	5.58787	0.793941
comp2269580_c0_seq1_m.67656	2.122	0.471795	0.00884211	0	5.58787	0.793941
comp2269987_c0_seq2_m.68354	1.88426	0.342981	0.012984	0	5.58787	0.793941
comp2270372_c0_seq1_m.69078	1.77665	0.352013	0.0156983	0	5.58787	0.793941
comp2270576_c0_seq1_m.69463	1.87957	0.562677	0.0132547	0	5.58787	0.793941
comp2270797_c0_seq10_m.69872	-1.76166	-0.51087	0.015968	0	5.58787	0.793941
comp2270876_c0_seq2_m.70018	-2.15131	-0.530066	0.00821053	0	5.58787	0.793941
comp2271225_c0_seq5_m.70641	-2.02388	-0.745413	0.0101927	0	5.58787	0.793941
comp2271350_c0_seq18_m.70897	2.5522	0.768265	0.00378947	0	5.58787	0.793941
comp2271350_c0_seq18_m.70898	2.52898	0.742445	0.00396992	0	5.58787	0.793941
comp2271425_c0_seq4_m.71034	-1.64399	-0.314779	0.0184079	0	5.58787	0.793941
comp2271649_c0_seq1_m.71599	-2.14587	-0.693114	0.00830075	0	5.58787	0.793941
comp2271994_c0_seq2_m.72269	-3.97539	-1.16721	0.000631579	0	5.58787	0.793941
comp2272233_c0_seq1_m.72760	-2.78754	-0.555197	0.00261654	0	5.58787	0.793941
comp2272254_c0_seq4_m.72822	-2.35241	-0.778185	0.00568421	0	5.58787	0.793941
comp2272299_c0_seq11_m.72914	-1.72834	-0.538566	0.0172274	0	5.58787	0.793941
comp2272319_c0_seq24_m.72950	5.45985	1.69018	0.000270677	0	5.58787	0.793941
comp2272495_c0_seq1_m.73308	1.63422	0.558243	0.0185883	0	5.58787	0.793941
comp2272547_c0_seq4_m.73421	-2.13382	-0.50103	0.00875188	0	5.58787	0.793941
comp2272698_c0_seq4_m.73763	5.44333	1.03492	0.000360902	0	5.58787	0.793941
comp2272961_c0_seq1_m.74370	2.47192	0.674543	0.00469173	0	5.58787	0.793941
comp2273038_c0_seq3_m.74522	-1.83606	-0.608118	0.0146156	0	5.58787	0.793941
comp2273257_c0_seq9_m.74986	3.05641	1.0399	0.00180451	0	5.58787	0.793941
comp2273417_c0_seq5_m.75297	-1.87124	-0.567287	0.0134352	0	5.58787	0.793941
comp2273599_c0_seq7_m.75677	-1.83761	-0.347	0.0145254	0	5.58787	0.793941
comp2273628_c0_seq6_m.75728	-1.60256	-0.479012	0.0191297	0	5.58787	0.793941
comp2273865_c0_seq2_m.76255	1.73198	0.475533	0.0168665	0	5.58787	0.793941
comp2274137_c1_seq25_m.76929	1.95022	0.549907	0.0117209	0	5.58787	0.793941
comp2274278_c0_seq6_m.77267	-1.62257	-0.39989	0.0187688	0	5.58787	0.793941
comp2274295_c0_seq2_m.77311	-1.87988	-0.573375	0.0131645	0	5.58787	0.793941
comp2274446_c0_seq19_m.77642	-2.17132	-0.477875	0.00793985	0	5.58787	0.793941
comp2274537_c0_seq28_m.77857	-1.77571	-0.483005	0.0157885	0	5.58787	0.793941
comp2274541_c0_seq1_m.77862	-2.61833	-0.947704	0.00342857	0	5.58787	0.793941
comp2274581_c1_seq21_m.92631	-1.94364	-0.51776	0.0119915	0	5.58787	0.793941
comp2274806_c0_seq1_m.78376	-2.18492	-0.59753	0.00748872	0	5.58787	0.793941
comp2274819_c0_seq2_m.78403	2.48529	0.507614	0.00442105	0	5.58787	0.793941
comp2275107_c0_seq4_m.79080	-2.11793	-0.441952	0.00902256	0	5.58787	0.793941
comp2275110_c1_seq5_m.79090	3.10093	0.724375	0.00153383	0	5.58787	0.793941
comp2275312_c0_seq8_m.79518	-1.62807	-0.515135	0.0186786	0	5.58787	0.793941
comp2275358_c0_seq1_m.79627	-1.72668	-0.401098	0.0173177	0	5.58787	0.793941
comp2275445_c0_seq2_m.79869	-1.79385	-0.427698	0.0152472	0	5.58787	0.793941
comp2275523_c0_seq29_m.80039	1.8148	0.422977	0.0148863	0	5.58787	0.793941
comp2275542_c0_seq9_m.80087	-1.86228	-0.535852	0.0137961	0	5.58787	0.793941
comp2275662_c1_seq10_m.80344	-1.78796	-0.333809	0.0155179	0	5.58787	0.793941
comp2275674_c1_seq1_m.80370	-1.63472	-0.554892	0.0184981	0	5.58787	0.793941
comp2275698_c0_seq5_m.80432	-1.7537	-0.432913	0.0160583	0	5.58787	0.793941
comp2275822_c0_seq10_m.80745	-3.00033	-0.883005	0.00207519	0	5.58787	0.793941
comp2275841_c0_seq1_m.80783	-3.03894	-0.72381	0.00189474	0	5.58787	0.793941
comp2275905_c0_seq4_m.80965	2.73058	0.695272	0.00279699	0	5.58787	0.793941
comp2276035_c1_seq16_m.81307	-2.07797	-0.481867	0.0094718	0	5.58787	0.793941
comp2276277_c0_seq18_m.81972	2.31078	0.5444	0.00613534	0	5.58787	0.793941
comp2276426_c0_seq2_m.82339	-2.14362	-0.630582	0.00866165	0	5.58787	0.793941
comp2276498_c2_seq1_m.82546	-1.68146	-0.560732	0.018047	0	5.58787	0.793941
comp2276523_c0_seq2_m.82609	1.60373	0.297544	0.0190395	0	5.58787	0.793941
comp2276668_c0_seq1_m.83017	-1.86473	-0.55016	0.0136156	0	5.58787	0.793941
comp2276743_c0_seq1_m.83169	2.11968	0.462494	0.00893233	0	5.58787	0.793941
comp2276750_c0_seq1_m.83194	2.65168	0.745018	0.00333835	0	5.58787	0.793941
comp2276768_c0_seq2_m.83249	2.73537	0.688108	0.00270677	0	5.58787	0.793941
comp2276871_c0_seq8_m.83582	2.43861	0.760939	0.00532331	0	5.58787	0.793941
comp2276936_c0_seq3_m.83786	2.17768	0.728867	0.00757895	0	5.58787	0.793941
comp2276966_c0_seq13_m.83854	-1.57771	-0.321446	0.020047	0	5.58787	0.793941
comp2277114_c1_seq1_m.84278	2.02353	0.446586	0.0102829	0	5.58787	0.793941
comp2277132_c1_seq1_m.84335	1.71686	0.493312	0.0174981	0	5.58787	0.793941
comp2277337_c0_seq4_m.84929	2.08343	0.397175	0.00929135	0	5.58787	0.793941
comp2277388_c0_seq8_m.85093	-1.73065	-0.63339	0.017047	0	5.58787	0.793941
comp2277475_c0_seq2_m.85365	-1.73091	-0.488543	0.0169568	0	5.58787	0.793941
comp2277501_c0_seq23_m.85461	-2.17053	-0.373083	0.00803008	0	5.58787	0.793941
comp2277605_c1_seq7_m.85828	2.00939	0.585513	0.0105536	0	5.58787	0.793941
comp2277680_c0_seq25_m.86056	-3.54014	-0.721233	0.000902256	0	5.58787	0.793941
comp2277729_c0_seq10_m.86207	-2.44247	-0.671787	0.00505263	0	5.58787	0.793941
comp2277815_c1_seq2_m.86535	1.75237	0.861861	0.0163289	0	5.58787	0.793941
comp2277816_c0_seq2_m.86536	-1.68911	-0.394762	0.0178665	0	5.58787	0.793941
comp2277869_c0_seq29_m.86707	1.71397	0.376939	0.0175883	0	5.58787	0.793941
comp2277908_c1_seq11_m.86865	2.27949	0.526824	0.00667669	0	5.58787	0.793941
comp2277933_c1_seq7_m.86946	-2.41141	-0.727463	0.00541353	0	5.58787	0.793941
comp2277933_c1_seq7_m.86947	-2.67364	-0.733633	0.00306767	0	5.58787	0.793941
comp2277945_c0_seq2_m.86985	-1.8006	-0.76561	0.0150667	0	5.58787	0.793941
comp2278054_c0_seq40_m.87392	-1.79437	-0.491788	0.015157	0	5.58787	0.793941
comp2278062_c0_seq4_m.87412	2.05582	0.527108	0.00974248	0	5.58787	0.793941
comp2278077_c0_seq3_m.87468	3.09194	1.05429	0.00162406	0	5.58787	0.793941
comp2278333_c0_seq10_m.88591	-1.84315	-0.45934	0.0143449	0	5.58787	0.793941
comp2278363_c0_seq7_m.88713	-1.6549	-0.365161	0.0183177	0	5.58787	0.793941
comp2278366_c0_seq5_m.88731	-1.94389	-0.387239	0.0119013	0	5.58787	0.793941
comp2278376_c0_seq1_m.88768	-2.0393	-0.525179	0.0101024	0	5.58787	0.793941
comp2278405_c0_seq22_m.88893	-2.44577	-0.702328	0.00496241	0	5.58787	0.793941
comp2278454_c0_seq1_m.89160	-1.86065	-0.404215	0.0138863	0	5.58787	0.793941
comp2278474_c0_seq1_m.89294	-2.17208	-0.534009	0.00784962	0	5.58787	0.793941
comp2278554_c0_seq4_m.90013	-2.21389	-0.56357	0.00730827	0	5.58787	0.793941
comp2278587_c0_seq14_m.90327	-2.95441	-0.580648	0.00216541	0	5.58787	0.793941
comp2278630_c0_seq8_m.90809	-2.54114	-0.592721	0.0038797	0	5.58787	0.793941
comp2279445_c0_seq1_m.91120	-1.99102	-0.428709	0.0109145	0	5.58787	0.793941
comp2279523_c0_seq1_m.91136	-1.93765	-0.44546	0.012172	0	5.58787	0.793941
comp2279567_c0_seq1_m.91146	2.1744	0.570479	0.00766917	0	5.58787	0.793941
comp2280178_c0_seq1_m.91219	-1.9075	-0.878411	0.0125329	0	5.58787	0.793941
comp2280591_c0_seq1_m.91233	2.00942	0.793855	0.0104633	0	5.58787	0.793941
comp2281676_c0_seq1_m.91255	2.14431	0.638836	0.0084812	0	5.58787	0.793941
comp2287273_c0_seq1_contamination_m.91384	1.72006	0.348274	0.0174079	0	5.58787	0.793941
comp2347711_c0_seq1_contamination_m.91628	-2.25563	-0.708946	0.00694737	0	5.58787	0.793941
gene17_m.92593	6.35045	1.55562	0.000180451	0	5.58787	0.793941
isotig10568_m.92324	-2.48375	-1.11571	0.00451128	0	5.58787	0.793941
gnl_Pdu_trscr_assembly_1_14638_m.60097	-1.99296	-0.515196	0.0108242	0	5.58787	0.793941
gnl_Pdu_trscr_assembly_1_16061_m.43221	-2.21438	-0.592447	0.00721805	0	5.58787	0.793941
gnl_Pdu_trscr_assembly_1_16296_m.13041	-2.22396	-0.501775	0.00703759	0	5.58787	0.793941
gnl_Pdu_trscr_assembly_1_2615_m.68529	1.94588	0.392439	0.0118111	0	5.58787	0.793941
gnl_Pdu_trscr_assembly_1_326_m.78835	-1.78012	-0.442689	0.0156081	0	5.58787	0.793941
gnl_Pdu_trscr_assembly_1_4228_m.63259	-1.84837	-0.613122	0.0140667	0	5.58787	0.793941
gnl_Pdu_trscr_assembly_1_5530_m.58454	-2.33958	-0.57371	0.00595489	0	5.58787	0.793941
gnl_Pdu_trscr_assembly_1_91632_m.21453	3.06756	0.822306	0.00171429	0	5.58787	0.793941
comp1785956_c0_seq1_m.2259	1.48398	0.490637	0.022438	0.00442478	5.58787	0.793941
comp2274999_c0_seq4_m.78837	1.49087	0.361619	0.0222509	0.00444444	5.58787	0.793941
comp2268857_c0_seq2_m.66328	-1.50095	-0.358191	0.0221607	0.00446429	5.58787	0.793941
comp2270220_c0_seq1_m.68776	1.50214	0.572494	0.0219831	0.0044843	5.58787	0.793941
comp2262360_c0_seq1_m.55644	-1.50751	-0.615895	0.0218055	0.0045045	5.58787	0.793941
comp2214845_c0_seq1_m.16111	1.51186	0.439445	0.0216297	0.00452489	5.58787	0.793941
comp2140166_c0_seq1_m.7086	1.52385	0.402487	0.0214323	0.00454545	5.58787	0.793941
gnl_Pdu_trscr_assembly_1_1514_m.69841	1.52718	0.355347	0.0213421	0.00456621	5.58787	0.793941
comp2278589_c0_seq3_m.90346	-1.53928	-0.336234	0.0212519	0.00458716	5.58787	0.793941
comp2275478_c0_seq7_m.79935	1.54405	0.375686	0.0211617	0.00460829	5.58787	0.793941
comp2276648_c1_seq1_m.82962	-1.54497	-0.401055	0.0210714	0.00462963	5.58787	0.793941
comp2276442_c0_seq1_m.82386	-1.54722	-0.36415	0.0209812	0.00465116	5.58787	0.793941
comp2269326_c0_seq2_m.67220	-1.5517	-0.330078	0.0208036	0.0046729	5.58787	0.793941
comp2278362_c0_seq1_m.88712	-1.44917	-0.329817	0.0239859	0.00622407	5.58787	0.793941
comp2277332_c0_seq1_m.84919	1.44935	0.337232	0.0238957	0.00625	5.58787	0.793941
comp2276940_c0_seq2_m.83802	-1.45039	-0.543154	0.0238055	0.00627615	5.58787	0.793941
comp2277479_c0_seq1_m.85385	-1.45699	-0.31224	0.0237152	0.00630252	5.58787	0.793941
comp2273017_c0_seq1_m.74484	-1.46033	-0.302707	0.023625	0.00632911	5.58787	0.793941
comp2269324_c0_seq1_m.67217	1.46325	0.297862	0.0235348	0.00635593	5.58787	0.793941
comp2277313_c0_seq3_m.84866	1.46396	0.480139	0.0234445	0.00638298	5.58787	0.793941
comp2208474_c0_seq1_m.14351	1.4658	0.271758	0.0233543	0.00641026	5.58787	0.793941
comp2277722_c0_seq17_m.86189	-1.46614	-0.353964	0.0231748	0.00643777	5.58787	0.793941
comp2277203_c0_seq4_m.84565	1.46721	0.44316	0.0230846	0.00646552	5.58787	0.793941
comp2271413_c1_seq5_m.70995	-1.47406	-0.339605	0.0229944	0.00649351	5.58787	0.793941
comp2279297_c0_seq1_m.91091	1.47517	0.287006	0.0229041	0.00652174	5.58787	0.793941
comp2256245_c0_seq1_m.46340	-1.47548	-0.376378	0.0228139	0.00655022	5.58787	0.793941
comp2273193_c0_seq1_m.74830	-1.47862	-0.524545	0.0227237	0.00657895	5.58787	0.793941
comp2258554_c1_seq2_m.49570	-1.47895	-0.483664	0.0226335	0.00660793	5.58787	0.793941
comp2234079_c0_seq2_m.24745	1.43764	0.355419	0.0242716	0.00823045	5.58787	0.793941
comp2275625_c0_seq11_m.80264	-1.44099	-0.53902	0.0241814	0.00826446	5.58787	0.793941
comp2277374_c0_seq2_m.85051	1.38692	0.417047	0.0276288	0.0093633	5.58787	0.793941
comp2276743_c1_seq1_m.83170	1.3906	0.341795	0.0274502	0.0093985	5.58787	0.793941
comp2264022_c0_seq13_m.58310	1.39662	0.337232	0.0271852	0.00943396	5.58787	0.793941
comp2270404_c0_seq3_m.69137	-1.3975	-0.388065	0.0270949	0.0094697	5.58787	0.793941
comp2278133_c0_seq3_m.87701	1.39835	0.324418	0.026907	0.0095057	5.58787	0.793941
comp2257601_c0_seq2_m.48241	-1.40603	-0.301246	0.0266316	0.00954198	5.58787	0.793941
comp2269321_c1_seq1_m.67212	-1.40789	-0.310824	0.0265414	0.00957854	5.58787	0.793941
comp2257939_c0_seq1_m.48703	-1.40853	-0.335884	0.0263637	0.00961538	5.58787	0.793941
comp2276634_c1_seq3_m.82935	1.41046	0.426104	0.0262735	0.00965251	5.58787	0.793941
comp2276413_c0_seq21_m.82313	-1.41069	-0.324275	0.0261833	0.00968992	5.58787	0.793941
comp2269201_c0_seq1_m.67004	-1.41271	-0.646411	0.026093	0.00972763	5.58787	0.793941
comp2241992_c0_seq1_m.30524	1.41507	0.364068	0.0259135	0.00976562	5.58787	0.793941
comp2202068_c0_seq1_m.13304	-1.41605	-0.342968	0.0258233	0.00980392	5.58787	0.793941
comp2276202_c0_seq3_m.81780	1.41801	0.403584	0.0256438	0.00984252	5.58787	0.793941
comp2226643_c0_seq1_m.20830	-1.41861	-0.299579	0.0255536	0.00988142	5.58787	0.793941
comp2274713_c1_seq7_m.78178	1.42119	0.398305	0.0254633	0.00992063	5.58787	0.793941
comp2268964_c0_seq1_m.66515	-1.42126	-0.404278	0.0253731	0.00996016	5.58787	0.793941
comp2261971_c0_seq1_m.55022	-1.42148	-0.394189	0.0252829	0.01	5.58787	0.793941
gnl_Pdu_trscr_assembly_1_20144_m.60515	1.42908	0.43705	0.0249962	0.0100402	5.58787	0.793941
comp2266701_c0_seq3_m.62512	-1.42926	-0.559532	0.024906	0.0100806	5.58787	0.793941
comp2277484_c0_seq6_m.85397	1.42932	0.326684	0.0248158	0.0101215	5.58787	0.793941
comp2262197_c0_seq1_m.55346	1.43037	0.465688	0.0247256	0.0101626	5.58787	0.793941
comp2274517_c0_seq1_m.77807	1.43096	0.340893	0.0246353	0.0102041	5.58787	0.793941
comp2268172_c0_seq1_m.65149	1.43695	0.311914	0.0244474	0.0102459	5.58787	0.793941
comp2274783_c0_seq9_m.78326	-1.36636	-0.434993	0.029031	0.0126812	5.58787	0.793941
comp2268336_c1_seq1_m.65474	1.36648	0.394934	0.0289408	0.0127273	5.58787	0.793941
comp2270996_c0_seq5_m.70236	1.36714	0.512494	0.0288506	0.0127737	5.58787	0.793941
comp1226347_c0_seq1_m.1231	1.37073	0.29326	0.0287603	0.0128205	5.58787	0.793941
comp2262927_c0_seq2_m.56544	1.37339	0.323895	0.0284859	0.0128676	5.58787	0.793941
comp2272842_c0_seq2_m.74081	-1.37608	-0.5086	0.0283957	0.0129151	5.58787	0.793941
comp2278012_c0_seq11_m.87235	-1.37912	-0.512757	0.0283055	0.012963	5.58787	0.793941
comp2258014_c0_seq1_m.48797	-1.38298	-0.663884	0.0281175	0.0130112	5.58787	0.793941
comp2272437_c1_seq1_m.73204	1.38319	0.391386	0.0280273	0.0130597	5.58787	0.793941
comp2277243_c1_seq3_m.84671	1.36471	0.322828	0.0293073	0.0144404	5.58787	0.793941
gnl_Pdu_trscr_assembly_1_17807_m.62055	1.35179	0.253664	0.0299586	0.0160142	5.58787	0.793941
comp1888169_c0_seq2_m.2479	1.35189	0.649745	0.0298684	0.0160714	5.58787	0.793941
comp2277388_c0_seq8_m.85092	-1.35258	-0.468689	0.0297782	0.016129	5.58787	0.793941
comp2274748_c1_seq11_m.78259	-1.35746	-0.285388	0.0295028	0.0161871	5.58787	0.793941
comp2278536_c1_seq38_m.89884	-1.34772	-0.375675	0.0304041	0.0176678	5.58787	0.793941
comp2246119_c0_seq1_m.34306	1.34983	0.339941	0.0302265	0.0177305	5.58787	0.793941
comp2266680_c0_seq1_m.62479	-1.33619	-0.321215	0.0313158	0.0190311	5.58787	0.793941
comp2270828_c0_seq11_m.69939	-1.33714	-0.390722	0.0312256	0.0190972	5.58787	0.793941
comp2261876_c0_seq1_m.54865	-1.33856	-0.358159	0.0310376	0.0191638	5.58787	0.793941
comp2253875_c0_seq1_m.43271	1.33931	0.330504	0.0309474	0.0192308	5.58787	0.793941
comp2243933_c0_seq1_m.32211	-1.34156	-0.38052	0.0307603	0.0192982	5.58787	0.793941
comp2266755_c0_seq1_m.62616	1.34297	0.667444	0.0305827	0.0193662	5.58787	0.793941
comp2265589_c0_seq2_m.60673	1.32819	0.253141	0.0318675	0.0204778	5.58787	0.793941
comp2277815_c0_seq5_m.86532	1.32837	0.681409	0.0317773	0.0205479	5.58787	0.793941
comp2263658_c0_seq3_m.57592	-1.3296	-0.327934	0.031687	0.0206186	5.58787	0.793941
comp2274474_c0_seq5_m.77718	-1.33184	-0.482656	0.0315113	0.0206897	5.58787	0.793941
comp2273141_c0_seq2_m.74737	-1.27856	-0.262009	0.034687	0.0207006	5.58787	0.793941
comp2269611_c0_seq1_m.67728	1.2797	0.315356	0.0344201	0.0207668	5.58787	0.793941
comp2277282_c0_seq11_m.84762	1.27991	0.33568	0.0343299	0.0208333	5.58787	0.793941
comp2259349_c0_seq2_m.50877	-1.28184	-0.38717	0.0342397	0.0209003	5.58787	0.793941
comp2272691_c0_seq4_m.73750	-1.2849	-0.441364	0.0341494	0.0209677	5.58787	0.793941
comp2263787_c0_seq3_m.57874	1.28584	0.348134	0.0340592	0.0210356	5.58787	0.793941
comp2258349_c0_seq1_m.49321	-1.29068	-0.223571	0.0338816	0.0211039	5.58787	0.793941
comp2271539_c0_seq2_m.71326	1.29076	0.313568	0.0337914	0.0211726	5.58787	0.793941
comp2278422_c0_seq1_m.89011	1.29094	0.34173	0.0337011	0.0212418	5.58787	0.793941
comp2268417_c0_seq2_m.65592	-1.29287	-0.469627	0.0335141	0.0213115	5.58787	0.793941
comp2277088_c0_seq32_m.84183	-1.2975	-0.275352	0.0333271	0.0213816	5.58787	0.793941
comp2276461_c0_seq7_m.82444	-1.29781	-0.301974	0.0332368	0.0214521	5.58787	0.793941
gnl_Pdu_trscr_assembly_1_1986_m.5697	-1.30254	-0.344031	0.0331466	0.0215232	5.58787	0.793941
comp2273647_c0_seq2_m.75785	-1.30739	-0.533096	0.0329492	0.0215947	5.58787	0.793941
comp2212572_c0_seq1_m.15390	1.31174	0.2629	0.032859	0.0216667	5.58787	0.793941
comp1244797_c0_seq1_m.1278	1.31184	0.273576	0.0327688	0.0217391	5.58787	0.793941
comp2268937_c0_seq1_m.66472	1.31328	0.312016	0.0326786	0.0218121	5.58787	0.793941
comp2273845_c0_seq2_m.76206	1.31463	0.343036	0.0325009	0.0218855	5.58787	0.793941
comp2273249_c0_seq4_m.74967	-1.26556	-0.383753	0.0355808	0.0219436	5.58787	0.793941
comp2263661_c0_seq1_m.57595	-1.31468	-0.257987	0.0324107	0.0219595	5.58787	0.793941
comp2258349_c0_seq1_m.49322	-1.26929	-0.382491	0.0354032	0.0220126	5.58787	0.793941
comp2279213_c0_seq1_m.91075	1.32208	0.253071	0.0323205	0.0220339	5.58787	0.793941
comp2271871_c0_seq8_m.72023	1.26987	0.323975	0.035313	0.022082	5.58787	0.793941
comp2274043_c0_seq7_m.76739	-1.32367	-0.413522	0.0320461	0.0221088	5.58787	0.793941
comp2275270_c0_seq2_m.79424	1.27094	0.322366	0.0352227	0.0221519	5.58787	0.793941
comp2272433_c0_seq1_m.73197	1.27437	0.284143	0.035047	0.0222222	5.58787	0.793941
comp1335339_c0_seq2_m.1954	1.24689	0.330501	0.0375968	0.0243902	5.58787	0.793941
comp1876805_c0_seq1_m.2339	1.25123	0.262386	0.0374098	0.0244648	5.58787	0.793941
comp1953077_c0_seq1_m.3483	-1.25175	-0.368735	0.0371447	0.0245399	5.58787	0.793941
comp2271124_c0_seq1_m.70454	1.25261	0.442698	0.0370545	0.0246154	5.58787	0.793941
comp2275508_c1_seq3_m.80009	-1.25585	-0.492918	0.0367848	0.0246914	5.58787	0.793941
comp2263983_c0_seq1_m.58208	1.25652	0.241911	0.0366945	0.0247678	5.58787	0.793941
comp2273204_c0_seq26_m.74869	-1.25655	-0.302869	0.0366043	0.0248447	5.58787	0.793941
comp2231610_c0_seq1_m.23229	1.25834	0.317827	0.0363252	0.0249221	5.58787	0.793941
comp2260960_c0_seq2_m.53456	1.25956	0.570182	0.0361429	0.025	5.58787	0.793941
comp2264066_c0_seq3_m.58370	-1.2338	-0.380447	0.0383289	0.027027	5.58787	0.793941
comp2260058_c0_seq1_m.51934	1.2345	0.378549	0.0382387	0.0271084	5.58787	0.793941
comp2280536_c0_seq1_m.91231	1.23762	0.363709	0.0380602	0.0271903	5.58787	0.793941
comp2267968_c0_seq2_m.64758	-1.24038	-0.383687	0.0379699	0.0272727	5.58787	0.793941
comp2277977_c1_seq3_m.87126	-1.24337	-0.268112	0.0378797	0.0273556	5.58787	0.793941
comp2273911_c0_seq8_m.76361	1.21619	0.354745	0.0401673	0.0292398	5.58787	0.793941
comp2265471_c0_seq5_m.60488	1.21672	0.280986	0.0400771	0.0293255	5.58787	0.793941
gnl_Pdu_trscr_assembly_1_9334_m.28552	-1.21989	-0.339569	0.0399868	0.0294118	5.58787	0.793941
gnl_Pdu_trscr_assembly_1_7274_m.39240	1.22085	0.507608	0.0398092	0.0294985	5.58787	0.793941
comp2236007_c0_seq2_m.26049	1.22346	0.391812	0.0393402	0.0295858	5.58787	0.793941
comp2276747_c1_seq2_m.83192	1.22514	0.359156	0.03925	0.0296736	5.58787	0.793941
comp2278605_c1_seq8_m.90480	-1.22552	-0.424487	0.0391598	0.0297619	5.58787	0.793941
comp1769718_c0_seq1_m.2239	1.22834	0.428067	0.03889	0.0298507	5.58787	0.793941
comp2264743_c0_seq3_m.59295	-1.2304	-0.236367	0.0387998	0.0299401	5.58787	0.793941
comp2271535_c0_seq1_m.71319	1.18788	0.273497	0.042593	0.0311615	5.58787	0.793941
comp2247098_c0_seq1_m.35275	-1.1911	-0.523886	0.0424051	0.03125	5.58787	0.793941
comp2271675_c0_seq2_m.71655	1.19354	0.403743	0.0422171	0.031339	5.58787	0.793941
comp2266801_c0_seq2_m.62707	1.1945	0.252165	0.0421269	0.0314286	5.58787	0.793941
comp2257487_c0_seq1_m.48064	1.19522	0.213914	0.0420367	0.0315186	5.58787	0.793941
gnl_Pdu_trscr_assembly_1_15590_m.29311	-1.19557	-0.456279	0.0419464	0.0316092	5.58787	0.793941
comp2257693_c0_seq3_m.48359	1.20056	0.221905	0.0415724	0.0317003	5.58787	0.793941
comp2263768_c0_seq2_m.57843	-1.20206	-0.349937	0.0414821	0.0317919	5.58787	0.793941
comp2268340_c1_seq1_m.65478	1.20844	0.29098	0.0409145	0.0318841	5.58787	0.793941
comp2237757_c0_seq1_m.27251	1.20935	0.229464	0.0407265	0.0319767	5.58787	0.793941
comp2247229_c0_seq1_m.35389	1.21484	0.255271	0.0404511	0.03207	5.58787	0.793941
comp2269814_c0_seq1_m.68069	1.16542	0.251997	0.0446814	0.0327869	5.58787	0.793941
comp2254568_c0_seq1_m.44123	-1.16588	-0.283591	0.0445912	0.0328767	5.58787	0.793941
comp1926910_c0_seq1_m.3122	-1.16664	-0.223416	0.0444126	0.032967	5.58787	0.793941
comp2272724_c0_seq1_m.73818	-1.1667	-0.219717	0.0442256	0.0330579	5.58787	0.793941
comp2263347_c0_seq2_m.57195	1.17002	0.287015	0.0440498	0.0331492	5.58787	0.793941
comp2278238_c0_seq6_m.88188	1.17268	0.27465	0.0436833	0.033241	5.58787	0.793941
comp2143334_c0_seq2_m.7649	1.17471	0.275546	0.043593	0.0333333	5.58787	0.793941
comp2257585_c0_seq1_m.48216	1.17512	0.284433	0.0435028	0.0334262	5.58787	0.793941
comp2272371_c0_seq1_m.73054	-1.1775	-0.26152	0.0434126	0.0335196	5.58787	0.793941
comp2276314_c0_seq1_m.82075	1.1781	0.363239	0.0433224	0.0336134	5.58787	0.793941
comp2248254_c1_seq2_m.36433	1.18051	0.44643	0.0432321	0.0337079	5.58787	0.793941
comp2251594_c0_seq1_m.40214	1.18083	0.329061	0.0430536	0.0338028	5.58787	0.793941
comp1916779_c0_seq1_m.2944	-1.18446	-0.269714	0.0428759	0.0338983	5.58787	0.793941
comp2274912_c0_seq4_m.78634	-1.15147	-0.216741	0.0454361	0.0352304	5.58787	0.793941
comp2272863_c1_seq5_m.74143	-1.15147	-0.21867	0.0453459	0.0353261	5.58787	0.793941
comp2258619_c0_seq2_m.49656	1.15696	0.301171	0.0449821	0.0354223	5.58787	0.793941
comp2272807_c0_seq4_m.74003	-1.14718	-0.251892	0.0458055	0.0378378	5.58787	0.793941
comp2279748_c0_seq1_m.91174	1.14685	0.310016	0.0460009	0.0404313	5.58787	0.793941
comp2259918_c0_seq1_m.51762	1.12839	0.253834	0.0475733	0.0426667	5.58787	0.793941
comp2268906_c0_seq4_m.66401	-1.13295	-0.259158	0.0468214	0.0427807	5.58787	0.793941
comp2274301_c0_seq6_m.77327	1.1345	0.304193	0.0467312	0.0428954	5.58787	0.793941
comp2275701_c1_seq1_m.80440	1.13673	0.33672	0.0463806	0.0430108	5.58787	0.793941
comp2252746_c0_seq1_m.41651	-1.11293	-0.278294	0.0488562	0.0447368	5.58787	0.793941
comp2257131_c0_seq2_m.47590	1.11396	0.350007	0.0486776	0.0448549	5.58787	0.793941
comp2254426_c0_seq1_m.43954	-1.12047	-0.358898	0.048407	0.0449735	5.58787	0.793941
comp2271916_c0_seq1_m.72122	1.12166	0.262575	0.0483167	0.0450928	5.58787	0.793941
comp2254668_c0_seq2_m.44236	1.12348	0.291278	0.0481288	0.0452128	5.58787	0.793941
comp2272876_c0_seq2_m.74167	1.11029	0.437561	0.0492547	0.0472441	5.58787	0.793941
gnl_Pdu_trscr_assembly_1_998_m.15062	-1.10525	-0.206115	0.0506551	0.0492228	5.58787	0.793941
comp2275974_c0_seq18_m.81146	-1.10618	-0.483614	0.0502726	0.0493506	5.58787	0.793941
comp2252186_c0_seq3_m.40915	1.1063	0.38012	0.0501823	0.0494792	5.58787	0.793941
comp2252059_c0_seq1_m.40786	1.1067	0.278759	0.0500047	0.0496084	5.58787	0.793941
comp2277995_c0_seq1_m.87177	-1.10835	-0.287209	0.0498271	0.0497382	5.58787	0.793941
comp2278623_c0_seq6_m.90693	1.07653	0.227848	0.054266	0.0525	5.58787	0.793941
comp2257975_c0_seq1_m.48752	1.08068	0.204739	0.0536128	0.0526316	5.58787	0.793941
comp2277617_c1_seq7_m.85877	-1.08069	-0.245077	0.0535226	0.0527638	5.58787	0.793941
gnl_Pdu_trscr_assembly_1_7327_m.81715	-1.08235	-0.232588	0.0534323	0.0528967	5.58787	0.793941
comp2278010_c1_seq9_m.87231	-1.08236	-0.338401	0.0533421	0.0530303	5.58787	0.793941
comp2261121_c0_seq1_m.53764	1.08465	0.237402	0.0531541	0.0531646	5.58787	0.793941
comp2277312_c0_seq10_m.84862	1.0851	0.273139	0.0529662	0.0532995	5.58787	0.793941
comp2270458_c0_seq1_m.69251	-1.08715	-0.31767	0.0528759	0.0534351	5.58787	0.793941
comp2267169_c0_seq1_m.63315	1.09322	0.229945	0.0524088	0.0535714	5.58787	0.793941
gnl_Pdu_trscr_assembly_1_19681_m.92605	1.09408	0.300102	0.0522293	0.0537084	5.58787	0.793941
comp2261047_c0_seq1_m.53653	-1.09426	-0.340342	0.0521391	0.0538462	5.58787	0.793941
comp2277005_c0_seq3_m.83943	1.09764	0.364039	0.0518731	0.0539846	5.58787	0.793941
comp2139380_c0_seq1_m.6935	1.0983	0.329617	0.0516776	0.0541237	5.58787	0.793941
gnl_Pdu_trscr_assembly_1_1644_m.62862	-1.09851	-0.240275	0.0515874	0.0542636	5.58787	0.793941
comp2250533_c0_seq1_m.39039	-1.07297	-0.252594	0.0548017	0.0547264	5.58787	0.793941
comp2277413_c0_seq4_m.85165	-1.07388	-0.240193	0.0546259	0.0548628	5.58787	0.793941
comp2248226_c3_seq1_m.36365	1.06975	0.268708	0.0554492	0.0567901	5.58787	0.793941
comp2263771_c0_seq2_m.57851	1.07056	0.21741	0.055359	0.0569307	5.58787	0.793941
comp2272435_c0_seq2_m.73201	1.07078	0.428462	0.0552688	0.057072	5.58787	0.793941
comp2279615_c0_seq1_m.91158	-1.05609	-0.178436	0.0579652	0.0581114	5.58787	0.793941
comp2267558_c0_seq1_m.64038	-1.06109	-0.222669	0.0571165	0.0582524	5.58787	0.793941
comp2277083_c0_seq3_m.84173	-1.06226	-0.285978	0.0569211	0.0583942	5.58787	0.793941
comp2276741_c0_seq2_m.83166	1.06318	0.244959	0.0567387	0.0585366	5.58787	0.793941
tuba_m.92505	1.06588	0.367546	0.0563647	0.0586797	5.58787	0.793941
comp2250470_c0_seq1_m.38949	1.06593	0.292251	0.0562744	0.0588235	5.58787	0.793941
comp2253561_c0_seq1_m.42779	-1.06803	-0.307517	0.0559013	0.0589681	5.58787	0.793941
comp1194322_c0_seq2_m.793	1.06827	0.223678	0.0558111	0.0591133	5.58787	0.793941
comp1971911_c0_seq1_m.3786	-1.0524	-0.358894	0.0589023	0.0600962	5.58787	0.793941
comp2271944_c0_seq11_m.72172	1.05267	0.272383	0.058812	0.060241	5.58787	0.793941
comp2273645_c0_seq11_m.75781	1.05442	0.27219	0.0584201	0.0603865	5.58787	0.793941
comp2269906_c0_seq2_m.68214	1.0478	0.250121	0.0599408	0.0647482	5.58787	0.793941
comp2206512_c0_seq1_m.14012	1.03972	0.255554	0.0614211	0.0692124	5.58787	0.793941
comp2276593_c0_seq3_m.82791	1.0398	0.233225	0.0612415	0.069378	5.58787	0.793941
comp2278378_c0_seq4_m.88778	-1.03833	-0.412807	0.0620846	0.0714286	5.58787	0.793941
comp2273519_c1_seq9_m.75533	1.02509	0.322628	0.0635836	0.0736342	5.58787	0.793941
comp2251346_c0_seq1_m.39994	-1.01799	-0.267066	0.0652491	0.0774648	5.58787	0.793941
comp2274693_c0_seq1_m.78142	1.01878	0.228662	0.0649821	0.0776471	5.58787	0.793941
comp2227117_c0_seq2_m.21047	1.02001	0.413508	0.0647848	0.0778302	5.58787	0.793941
comp2276159_c1_seq5_m.81677	-1.02047	-0.30048	0.0646945	0.0780142	5.58787	0.793941
comp2275266_c0_seq21_m.79421	-1.02375	-0.239549	0.0643393	0.0781991	5.58787	0.793941
comp2251806_c0_seq1_m.40480	1.01099	0.210976	0.0663496	0.0794393	5.58787	0.793941
comp2264121_c0_seq1_m.58459	1.01576	0.459132	0.0656288	0.0796253	5.58787	0.793941
comp2278031_c0_seq2_m.87291	0.994005	0.219177	0.0688524	0.0810185	5.58787	0.793941
comp2268194_c0_seq1_m.65186	-0.996645	-0.265468	0.0684746	0.0812065	5.58787	0.793941
comp2273900_c0_seq1_m.76336	0.997169	0.238895	0.068297	0.0813953	5.58787	0.793941
comp2261058_c0_seq1_m.53667	0.999782	0.243313	0.0678412	0.0815851	5.58787	0.793941
comp2269848_c0_seq4_m.68115	-0.992705	-0.356219	0.0696006	0.0831409	5.58787	0.793941
comp2272519_c1_seq3_m.73361	-0.981816	-0.251584	0.0712021	0.0898618	5.58787	0.793941
comp2272583_c0_seq2_m.73488	-0.978035	-0.188187	0.0722378	0.0913242	5.58787	0.793941
comp2262362_c0_seq1_m.55645	0.978744	0.249034	0.0721476	0.0915332	5.58787	0.793941
comp2037149_c0_seq1_m.4742	0.97907	0.263152	0.0719605	0.0917431	5.58787	0.793941
comp2266714_c1_seq1_m.62532	0.981568	0.288937	0.0714812	0.091954	5.58787	0.793941
comp2257395_c0_seq4_m.47951	-0.976824	-0.291924	0.07261	0.0933941	5.58787	0.793941
comp2276825_c0_seq1_m.83424	0.966707	0.210127	0.0742086	0.0968468	5.58787	0.793941
comp2275068_c1_seq1_m.78996	0.970797	0.234404	0.0738355	0.0970655	5.58787	0.793941
comp2266233_c0_seq1_m.61658	0.972869	0.369369	0.0735404	0.0972851	5.58787	0.793941
gnl_Pdu_trscr_assembly_1_15577_m.47320	0.973075	0.209448	0.0733618	0.0975057	5.58787	0.793941
comp2272087_c1_seq4_m.72458	-0.973836	-0.182763	0.0731795	0.0977273	5.58787	0.793941
comp2266830_c0_seq2_m.62753	0.962727	0.249378	0.0747716	0.0986547	5.58787	0.793941
comp2269745_c1_seq1_m.67949	-0.963853	-0.302055	0.0745836	0.0988764	5.58787	0.793941
comp1961272_c0_seq1_m.3584	0.956945	0.295438	0.076485	0.0995575	5.58787	0.793941
comp2264796_c2_seq1_m.59361	0.958191	0.265813	0.0762895	0.0997783	5.58787	0.793941
comp2268942_c0_seq5_m.66483	-0.959309	-0.309241	0.075828	0.1	5.58787	0.793941

## Sheet: IM_NM vs M_NM_Male
	d	logFC	pvalue	FDR	Z	R
comp1781461_c0_seq1_m.2253	-2.45433	-0.58221	0.00749248	0	5.55026	0.807518
comp1916779_c0_seq1_m.2944	-2.41409	-0.439908	0.00776316	0	5.55026	0.807518
comp1945561_c0_seq2_m.3380	-2.52957	-0.696775	0.00659305	0	5.55026	0.807518
comp1958245_c0_seq1_m.3536	-2.63319	-0.552485	0.00569079	0	5.55026	0.807518
comp1965369_c0_seq1_contamination_m.3664	2.13127	0.641594	0.0112002	0	5.55026	0.807518
comp2139115_c0_seq1_m.6894	-2.20433	-0.859019	0.00993797	0	5.55026	0.807518
comp2204672_c0_seq1_m.13711	-2.69017	-0.512602	0.00542011	0	5.55026	0.807518
comp2221095_c0_seq1_m.18558	-2.11741	-0.488764	0.0116513	0	5.55026	0.807518
comp2224448_c0_seq1_m.19874	-2.06613	-0.293636	0.0125686	0	5.55026	0.807518
comp2226643_c0_seq1_m.20830	-2.10958	-0.405398	0.011922	0	5.55026	0.807518
comp2232290_c0_seq2_m.23637	-2.20123	-0.882936	0.0100282	0	5.55026	0.807518
comp2232805_c0_seq1_m.23974	4.42988	0.79749	0.000992481	0	5.55026	0.807518
comp2232909_c0_seq1_m.24034	5.50715	1.83782	0.000360902	0	5.55026	0.807518
comp2234282_c0_seq1_m.24908	3.67691	0.939974	0.00153383	0	5.55026	0.807518
comp2237468_c0_seq1_m.27022	-3.39984	-1.13734	0.00216541	0	5.55026	0.807518
comp2239691_c0_seq1_m.28548	-2.54729	-0.806964	0.00605169	0	5.55026	0.807518
comp2242282_c0_seq1_m.30761	-2.0479	-0.464936	0.0128393	0	5.55026	0.807518
comp2242933_c0_seq1_m.31351	7.45118	1.90402	9.02256e-05	0	5.55026	0.807518
comp2243258_c0_seq1_m.31584	-2.91	-0.647572	0.00443045	0	5.55026	0.807518
comp2246514_c1_seq1_m.34691	-2.42834	-0.50317	0.00767293	0	5.55026	0.807518
comp2247098_c0_seq1_m.35275	-1.95134	-0.701997	0.0147406	0	5.55026	0.807518
comp2247988_c0_seq1_m.36173	-5.30924	-1.07683	0.000541353	0	5.55026	0.807518
comp2248821_c1_seq2_m.37050	-2.8466	-0.522039	0.00479135	0	5.55026	0.807518
comp2252285_c0_seq2_m.41107	-2.84274	-0.53114	0.00488158	0	5.55026	0.807518
comp2252847_c0_seq1_m.41763	2.1227	0.408207	0.0114709	0	5.55026	0.807518
comp2254167_c0_seq1_m.43587	3.10064	0.724563	0.00371147	0	5.55026	0.807518
comp2254470_c0_seq1_m.44006	-1.99513	-0.377414	0.0139164	0	5.55026	0.807518
comp2254477_c0_seq1_m.44015	2.54021	0.485851	0.00623214	0	5.55026	0.807518
comp2254520_c0_seq1_m.44059	-3.22377	-0.616049	0.0028844	0	5.55026	0.807518
comp2254641_c1_seq1_m.44200	-3.61919	-0.693148	0.00162406	0	5.55026	0.807518
comp2254675_c0_seq1_m.44244	-2.16855	-0.375396	0.0103882	0	5.55026	0.807518
comp2256041_c0_seq1_m.46046	4.96706	1.05685	0.000631579	0	5.55026	0.807518
comp2256095_c0_seq1_m.46136	-3.11782	-0.611907	0.00342575	0	5.55026	0.807518
comp2256220_c0_seq1_m.46316	-2.69555	-0.681342	0.00532989	0	5.55026	0.807518
comp2257905_c0_seq1_m.48664	-2.81196	-0.611491	0.00506203	0	5.55026	0.807518
comp2258554_c0_seq1_m.49568	-2.05586	-0.465704	0.0126588	0	5.55026	0.807518
comp2261018_c0_seq2_m.53614	-1.92812	-0.417657	0.0151015	0	5.55026	0.807518
comp2261368_c1_seq1_m.54120	-2.26525	-0.410532	0.00903571	0	5.55026	0.807518
comp2261379_c0_seq1_m.54133	-2.10172	-0.731569	0.0120122	0	5.55026	0.807518
comp2261399_c0_seq2_m.54155	-3.30627	-1.09162	0.00261372	0	5.55026	0.807518
comp2261623_c0_seq1_m.54431	-3.16727	-0.667211	0.0032453	0	5.55026	0.807518
comp2261971_c0_seq1_m.55022	-2.288	-0.516786	0.00858929	0	5.55026	0.807518
comp2262137_c0_seq3_m.92268	-4.66838	-1.68811	0.00081203	0	5.55026	0.807518
comp2262137_c0_seq4_m.55246	-4.52382	-1.14645	0.000902256	0	5.55026	0.807518
comp2262465_c0_seq5_m.55795	-2.71959	-1.02575	0.00523966	0	5.55026	0.807518
comp2263115_c0_seq2_m.56831	2.15602	0.359278	0.0108393	0	5.55026	0.807518
comp2263277_c0_seq1_m.57091	-2.36207	-0.454662	0.00803383	0	5.55026	0.807518
comp2263291_c0_seq2_m.57114	2.22954	0.537719	0.00930639	0	5.55026	0.807518
comp2263612_c1_seq1_m.57550	-2.50885	-0.414028	0.00695395	0	5.55026	0.807518
comp2263667_c0_seq1_m.57601	1.99948	0.589297	0.0138261	0	5.55026	0.807518
comp2263822_c0_seq1_m.57945	3.46307	0.710644	0.00189474	0	5.55026	0.807518
comp2263873_c0_seq9_m.58029	-3.30908	-1.29177	0.0025235	0	5.55026	0.807518
comp2263896_c0_seq3_m.58065	1.93209	0.436179	0.0149211	0	5.55026	0.807518
comp2264302_c0_seq2_m.58699	-2.46704	-0.700109	0.00731203	0	5.55026	0.807518
comp2264838_c0_seq3_m.59436	-3.20016	-1.06571	0.00315508	0	5.55026	0.807518
comp2265326_c0_seq3_m.60204	-2.20628	-0.679535	0.00984774	0	5.55026	0.807518
comp2265656_c0_seq3_m.60780	-2.46712	-0.488138	0.0072218	0	5.55026	0.807518
comp2265768_c0_seq2_m.60943	-2.51589	-0.745097	0.0067735	0	5.55026	0.807518
comp2265897_c0_seq5_m.61166	3.12474	0.719022	0.00333553	0	5.55026	0.807518
comp2266171_c0_seq1_m.61557	2.23256	0.549194	0.00921617	0	5.55026	0.807518
comp2266280_c0_seq1_m.61789	3.43754	0.701146	0.00207519	0	5.55026	0.807518
comp2266503_c0_seq6_m.62129	-2.03143	-0.513147	0.0132904	0	5.55026	0.807518
comp2266507_c0_seq10_m.62138	-2.92177	-0.521889	0.00434023	0	5.55026	0.807518
comp2266692_c0_seq1_m.62504	2.2069	0.564683	0.00975752	0	5.55026	0.807518
comp2267732_c0_seq2_m.64331	-2.85573	-0.604653	0.00470113	0	5.55026	0.807518
comp2268473_c1_seq1_m.65668	2.13076	0.753597	0.0112904	0	5.55026	0.807518
comp2268869_c0_seq6_m.66344	-2.54772	-0.756298	0.00596147	0	5.55026	0.807518
comp2268892_c0_seq1_m.66381	-2.61891	-0.930017	0.00578102	0	5.55026	0.807518
comp2268906_c0_seq4_m.66401	-2.06961	-0.34557	0.0124784	0	5.55026	0.807518
comp2268964_c0_seq1_m.66515	-2.51561	-0.449158	0.00686372	0	5.55026	0.807518
comp2269060_c0_seq1_m.66718	-2.04635	-0.625553	0.0129295	0	5.55026	0.807518
comp2269060_c1_seq1_m.66719	-2.38575	-0.814531	0.00794361	0	5.55026	0.807518
comp2269171_c0_seq3_m.66933	1.97853	0.643522	0.0141842	0	5.55026	0.807518
comp2269185_c0_seq2_m.66963	-2.85751	-0.597596	0.0046109	0	5.55026	0.807518
comp2269230_c0_seq2_m.67055	-2.09171	-0.495881	0.0122077	0	5.55026	0.807518
comp2269532_c0_seq13_m.67583	-1.92179	-0.550559	0.015282	0	5.55026	0.807518
comp2269580_c0_seq1_m.67656	1.9739	0.445147	0.0142744	0	5.55026	0.807518
comp2270220_c0_seq1_m.68776	2.00685	0.738806	0.0136457	0	5.55026	0.807518
comp2270876_c0_seq2_m.70018	-2.55399	-0.596467	0.00587124	0	5.55026	0.807518
comp2271225_c0_seq5_m.70641	-2.31572	-0.792118	0.00840883	0	5.55026	0.807518
comp2271350_c0_seq18_m.70898	2.48663	0.540794	0.00713158	0	5.55026	0.807518
comp2271649_c0_seq1_m.71599	-2.46042	-0.676051	0.00740226	0	5.55026	0.807518
comp2271994_c0_seq2_m.72269	-4.67929	-1.06223	0.000721805	0	5.55026	0.807518
comp2272087_c1_seq4_m.72458	-2.64518	-0.450435	0.00560056	0	5.55026	0.807518
comp2272233_c0_seq1_m.72760	-3.08124	-0.544217	0.00380169	0	5.55026	0.807518
comp2272254_c0_seq4_m.72822	-2.2717	-0.702386	0.00894549	0	5.55026	0.807518
comp2272319_c0_seq24_m.72950	5.43958	1.75759	0.000451128	0	5.55026	0.807518
comp2272547_c0_seq4_m.73421	-2.53773	-0.539844	0.00632237	0	5.55026	0.807518
comp2272698_c0_seq4_m.73763	5.80309	1.13088	0.000270677	0	5.55026	0.807518
comp2272961_c0_seq1_m.74370	3.3457	0.794006	0.00234305	0	5.55026	0.807518
comp2273017_c0_seq1_m.74484	-1.96987	-0.364694	0.0143647	0	5.55026	0.807518
comp2273038_c0_seq3_m.74522	-2.52312	-0.62672	0.00668327	0	5.55026	0.807518
comp2273257_c0_seq9_m.74986	2.86799	1.19761	0.00452068	0	5.55026	0.807518
comp2273417_c0_seq5_m.75297	-2.03306	-0.573124	0.01311	0	5.55026	0.807518
comp2273647_c0_seq2_m.75785	-2.00136	-0.643471	0.0137359	0	5.55026	0.807518
comp2274474_c0_seq5_m.77718	-2.08409	-0.659829	0.0122979	0	5.55026	0.807518
comp2274541_c0_seq1_m.77862	-3.3407	-1.1363	0.00243327	0	5.55026	0.807518
comp2274581_c1_seq21_m.92631	-3.21377	-0.650053	0.00306485	0	5.55026	0.807518
comp2274783_c0_seq9_m.78326	-2.18919	-0.492139	0.0102077	0	5.55026	0.807518
comp2275107_c0_seq4_m.79080	-3.61275	-0.562888	0.00171429	0	5.55026	0.807518
comp2275110_c1_seq5_m.79090	3.45957	0.801831	0.00198496	0	5.55026	0.807518
comp2275270_c0_seq2_m.79424	2.33224	0.402769	0.00831861	0	5.55026	0.807518
comp2275312_c0_seq8_m.79518	-2.04266	-0.539043	0.0130197	0	5.55026	0.807518
comp2275445_c0_seq2_m.79869	-2.28052	-0.504638	0.00867951	0	5.55026	0.807518
comp2275523_c0_seq29_m.80039	2.1507	0.434454	0.0109295	0	5.55026	0.807518
comp2275542_c0_seq9_m.80087	-2.03253	-0.572655	0.0132002	0	5.55026	0.807518
comp2275662_c1_seq10_m.80344	-2.40305	-0.402963	0.00785338	0	5.55026	0.807518
comp2275822_c0_seq10_m.80745	-3.21807	-0.823206	0.00297462	0	5.55026	0.807518
comp2275841_c0_seq1_m.80783	-3.28711	-0.717115	0.00270395	0	5.55026	0.807518
comp2276035_c1_seq16_m.81307	-2.27565	-0.500123	0.00876974	0	5.55026	0.807518
comp2276277_c0_seq18_m.81972	3.08098	0.628102	0.00389192	0	5.55026	0.807518
comp2276426_c0_seq2_m.82339	-2.83341	-0.721772	0.0049718	0	5.55026	0.807518
comp2276442_c0_seq1_m.82386	-2.146	-0.407691	0.0110197	0	5.55026	0.807518
comp2276461_c0_seq7_m.82444	-2.16715	-0.466062	0.0104784	0	5.55026	0.807518
comp2276498_c2_seq1_m.82546	-3.02906	-0.84237	0.00398214	0	5.55026	0.807518
comp2276523_c0_seq2_m.82609	1.92108	0.397506	0.0153722	0	5.55026	0.807518
comp2276648_c1_seq1_m.82962	-1.92337	-0.443318	0.0151917	0	5.55026	0.807518
comp2276750_c0_seq1_m.83194	2.13067	0.56883	0.0113806	0	5.55026	0.807518
comp2276768_c0_seq2_m.83249	3.60101	0.788649	0.00180451	0	5.55026	0.807518
comp2276871_c0_seq8_m.83582	1.99433	0.551633	0.0140066	0	5.55026	0.807518
comp2276936_c0_seq3_m.83786	2.22901	1.005	0.00948684	0	5.55026	0.807518
comp2277005_c0_seq3_m.83943	1.93862	0.454669	0.0148308	0	5.55026	0.807518
comp2277088_c0_seq32_m.84183	-2.20732	-0.468063	0.00966729	0	5.55026	0.807518
comp2277132_c1_seq1_m.84335	2.01524	0.516172	0.0135555	0	5.55026	0.807518
comp2277203_c0_seq4_m.84565	1.92944	0.504768	0.0150113	0	5.55026	0.807518
comp2277282_c0_seq11_m.84762	4.38246	0.90044	0.00108271	0	5.55026	0.807518
comp2277605_c1_seq7_m.85828	1.9686	0.466812	0.0144549	0	5.55026	0.807518
comp2277680_c0_seq25_m.86056	-2.545	-0.622846	0.00614192	0	5.55026	0.807518
comp2277815_c0_seq5_m.86532	2.53194	0.813585	0.00641259	0	5.55026	0.807518
comp2277815_c1_seq2_m.86535	3.1012	0.984723	0.00362124	0	5.55026	0.807518
comp2277869_c0_seq29_m.86707	2.0526	0.432672	0.0127491	0	5.55026	0.807518
comp2277908_c1_seq11_m.86865	2.17179	0.513975	0.0102979	0	5.55026	0.807518
comp2277933_c1_seq7_m.86947	-2.22464	-0.659407	0.00957707	0	5.55026	0.807518
comp2277945_c0_seq2_m.86985	-3.69391	-1.11158	0.00135338	0	5.55026	0.807518
comp2277972_c0_seq17_m.87106	2.13952	0.443951	0.01111	0	5.55026	0.807518
comp2278054_c0_seq40_m.87392	-2.11732	-0.548184	0.0118318	0	5.55026	0.807518
comp2278062_c0_seq4_m.87412	3.6815	0.79463	0.00144361	0	5.55026	0.807518
comp2278077_c0_seq3_m.87468	4.18191	1.01328	0.00126316	0	5.55026	0.807518
comp2278333_c0_seq10_m.88591	-1.92017	-0.432644	0.0154624	0	5.55026	0.807518
comp2278366_c0_seq5_m.88731	-2.12228	-0.446432	0.0115611	0	5.55026	0.807518
comp2278422_c0_seq1_m.89011	2.5314	0.515032	0.00650282	0	5.55026	0.807518
comp2278474_c0_seq1_m.89294	-2.15941	-0.52589	0.0106588	0	5.55026	0.807518
comp2278509_c0_seq8_m.89637	-2.07423	-0.372825	0.0123882	0	5.55026	0.807518
comp2278554_c0_seq4_m.90013	-2.24517	-0.584223	0.00912594	0	5.55026	0.807518
comp2278587_c0_seq14_m.90327	-2.43815	-0.518573	0.00758271	0	5.55026	0.807518
comp2278630_c0_seq8_m.90809	-1.95838	-0.463383	0.0146504	0	5.55026	0.807518
comp2279523_c0_seq1_m.91136	-2.22934	-0.4649	0.00939662	0	5.55026	0.807518
comp2279567_c0_seq1_m.91146	2.16419	0.565611	0.0105686	0	5.55026	0.807518
comp2280591_c0_seq1_m.91233	2.3099	0.915038	0.00849906	0	5.55026	0.807518
comp2281676_c0_seq1_m.91255	2.93696	0.879202	0.00416259	0	5.55026	0.807518
gene17_m.92593	5.93915	1.704	0.000180451	0	5.55026	0.807518
isotig10568_m.92324	-2.9442	-1.26921	0.00407237	0	5.55026	0.807518
gnl_Pdu_trscr_assembly_1_14638_m.60097	-2.11734	-0.503501	0.0117415	0	5.55026	0.807518
gnl_Pdu_trscr_assembly_1_1514_m.69841	2.15622	0.347563	0.0107491	0	5.55026	0.807518
gnl_Pdu_trscr_assembly_1_16061_m.43221	-2.65817	-0.621642	0.00551034	0	5.55026	0.807518
gnl_Pdu_trscr_assembly_1_16296_m.13041	-3.28588	-0.714114	0.00279417	0	5.55026	0.807518
gnl_Pdu_trscr_assembly_1_326_m.78835	-1.91958	-0.434054	0.0155526	0	5.55026	0.807518
gnl_Pdu_trscr_assembly_1_5530_m.58454	-4.23592	-0.738789	0.00117293	0	5.55026	0.807518
comp2202068_c0_seq1_m.13304	-1.66054	-0.310098	0.0233562	0.00431034	5.55026	0.807518
comp2252059_c0_seq1_m.40786	1.66065	0.357221	0.023266	0.004329	5.55026	0.807518
comp2245721_c0_seq1_m.33844	1.66165	0.428631	0.0231758	0.00434783	5.55026	0.807518
comp2004487_c0_seq1_m.4269	1.67196	0.668168	0.0230855	0.00436681	5.55026	0.807518
comp2265883_c1_seq1_m.61140	1.67475	0.540053	0.0229953	0.00438596	5.55026	0.807518
comp2276940_c0_seq2_m.83802	-1.67628	-0.471546	0.0229051	0.00440529	5.55026	0.807518
comp2269611_c0_seq1_m.67728	1.67803	0.361032	0.0228148	0.00442478	5.55026	0.807518
comp2254496_c0_seq2_m.44030	-1.6838	-0.311046	0.0227246	0.00444444	5.55026	0.807518
comp2279445_c0_seq1_m.91120	-1.68931	-0.435654	0.0226344	0.00446429	5.55026	0.807518
comp2278376_c0_seq1_m.88768	-1.69213	-0.415378	0.0225442	0.0044843	5.55026	0.807518
comp2243933_c0_seq1_m.32211	-1.6927	-0.448946	0.0224539	0.0045045	5.55026	0.807518
comp1244797_c0_seq1_m.1278	1.69778	0.325812	0.0223637	0.00452489	5.55026	0.807518
comp2201786_c0_seq1_m.13247	1.70158	0.679174	0.0221861	0.00454545	5.55026	0.807518
comp2263661_c0_seq1_m.57595	-1.7024	-0.300918	0.0220959	0.00456621	5.55026	0.807518
comp1888169_c0_seq2_m.2479	1.70241	0.712902	0.0220056	0.00458716	5.55026	0.807518
comp2279536_c0_seq1_m.91140	-1.70357	-0.342405	0.0219154	0.00460829	5.55026	0.807518
gnl_Pdu_trscr_assembly_1_998_m.15062	-1.70886	-0.282574	0.0218252	0.00462963	5.55026	0.807518
comp2224014_c0_seq1_m.19704	1.70966	0.383257	0.021735	0.00465116	5.55026	0.807518
comp2273628_c0_seq6_m.75728	-1.71288	-0.465776	0.0216447	0.0046729	5.55026	0.807518
comp2271871_c0_seq8_m.72023	1.7179	0.41159	0.0215545	0.00469484	5.55026	0.807518
comp2253149_c0_seq1_m.42245	1.72155	0.489565	0.0214643	0.00471698	5.55026	0.807518
comp2261428_c0_seq1_m.54200	-1.72221	-0.279212	0.0213741	0.00473934	5.55026	0.807518
comp2275714_c2_seq1_m.80469	1.73073	0.24692	0.0210996	0.0047619	5.55026	0.807518
comp1194362_c0_seq2_m.804	1.73282	0.320436	0.0210094	0.00478469	5.55026	0.807518
comp2275358_c0_seq1_m.79627	-1.73293	-0.367349	0.0209192	0.00480769	5.55026	0.807518
comp1194106_c0_seq1_m.742	1.73305	0.302175	0.0208289	0.00483092	5.55026	0.807518
comp2275616_c0_seq2_m.80253	-1.742	-0.477955	0.0206494	0.00485437	5.55026	0.807518
comp2275905_c0_seq4_m.80965	1.74244	0.546632	0.0205592	0.00487805	5.55026	0.807518
comp2229729_c0_seq1_m.22264	1.74536	0.388134	0.020469	0.00490196	5.55026	0.807518
comp2260103_c0_seq1_m.51994	-1.74662	-0.340678	0.0203788	0.00492611	5.55026	0.807518
comp2276413_c0_seq21_m.82313	-1.74791	-0.344536	0.0202885	0.0049505	5.55026	0.807518
comp2239022_c0_seq1_m.28102	1.75047	0.617525	0.0201983	0.00497512	5.55026	0.807518
comp2271539_c0_seq2_m.71326	1.75111	0.300034	0.0201081	0.005	5.55026	0.807518
comp2276159_c1_seq5_m.81677	-1.75227	-0.34707	0.0200179	0.00502513	5.55026	0.807518
comp2277313_c0_seq3_m.84866	1.75366	0.500354	0.0199276	0.00505051	5.55026	0.807518
comp2271425_c0_seq4_m.71034	-1.76412	-0.327232	0.0198374	0.00507614	5.55026	0.807518
gnl_Pdu_trscr_assembly_1_4228_m.63259	-1.76561	-0.566382	0.0197472	0.00510204	5.55026	0.807518
comp2278405_c0_seq22_m.88893	-1.7699	-0.61308	0.019657	0.00512821	5.55026	0.807518
comp2277933_c1_seq7_m.86946	-1.77012	-0.640646	0.0195667	0.00515464	5.55026	0.807518
comp2189372_c0_seq1_m.11219	-1.77479	-0.30273	0.0194765	0.00518135	5.55026	0.807518
comp2277722_c0_seq17_m.86189	-1.77618	-0.373338	0.0193863	0.00520833	5.55026	0.807518
comp2269627_c0_seq2_m.67749	1.78903	0.264718	0.019094	0.0052356	5.55026	0.807518
comp2254568_c0_seq1_m.44123	-1.7905	-0.415884	0.0190038	0.00526316	5.55026	0.807518
comp2264621_c0_seq1_m.59138	-1.7926	-0.526288	0.0189135	0.00529101	5.55026	0.807518
gnl_Pdu_trscr_assembly_1_7327_m.81715	-1.79294	-0.318805	0.0188233	0.00531915	5.55026	0.807518
comp2272118_c0_seq11_m.72524	1.79732	0.295462	0.0187331	0.00534759	5.55026	0.807518
comp2270404_c0_seq3_m.69137	-1.80487	-0.451302	0.0186429	0.00537634	5.55026	0.807518
comp2263691_c0_seq2_m.57661	-1.80923	-0.525332	0.0185526	0.00540541	5.55026	0.807518
comp2257939_c0_seq1_m.48703	-1.81108	-0.362986	0.0184624	0.00543478	5.55026	0.807518
comp2267634_c0_seq2_m.64174	-1.81256	-0.485473	0.0183722	0.00546448	5.55026	0.807518
comp2269297_c0_seq2_m.67181	1.81461	0.565169	0.018282	0.00549451	5.55026	0.807518
comp2277114_c1_seq1_m.84278	1.82577	0.334877	0.0181917	0.00552486	5.55026	0.807518
comp2270797_c0_seq10_m.69872	-1.82758	-0.515623	0.0181015	0.00555556	5.55026	0.807518
comp2262360_c0_seq1_m.55644	-1.82837	-0.701754	0.0180113	0.00558659	5.55026	0.807518
comp2256245_c0_seq1_m.46340	-1.83622	-0.421128	0.0179211	0.00561798	5.55026	0.807518
comp2278589_c0_seq3_m.90346	-1.83755	-0.385709	0.0178308	0.00564972	5.55026	0.807518
comp1926910_c0_seq1_m.3122	-1.83929	-0.313671	0.0177406	0.00568182	5.55026	0.807518
gnl_Pdu_trscr_assembly_1_20792_m.71829	1.84069	0.338247	0.0176504	0.00571429	5.55026	0.807518
comp2206512_c0_seq1_m.14012	1.84465	0.417749	0.0174549	0.00574713	5.55026	0.807518
comp2253516_c0_seq4_m.42708	-1.85867	-0.886812	0.0172754	0.00578035	5.55026	0.807518
comp2264743_c0_seq3_m.59295	-1.8592	-0.326182	0.0170883	0.00581395	5.55026	0.807518
comp2231610_c0_seq1_m.23229	1.85981	0.387638	0.0169981	0.00584795	5.55026	0.807518
comp2280178_c0_seq1_m.91219	-1.86058	-0.667468	0.0169079	0.00588235	5.55026	0.807518
comp2214845_c0_seq1_m.16111	1.86267	0.445962	0.0168177	0.00591716	5.55026	0.807518
gnl_Pdu_trscr_assembly_1_9334_m.28552	-1.86532	-0.389637	0.0167274	0.00595238	5.55026	0.807518
comp2252506_c0_seq1_m.41372	-1.86841	-0.345011	0.0166372	0.00598802	5.55026	0.807518
comp2278362_c0_seq1_m.88712	-1.86951	-0.383792	0.016547	0.0060241	5.55026	0.807518
comp2262317_c0_seq2_m.55577	1.87501	0.587778	0.0164568	0.00606061	5.55026	0.807518
comp2269321_c1_seq1_m.67212	-1.88637	-0.365966	0.0163665	0.00609756	5.55026	0.807518
comp2272495_c0_seq1_m.73308	1.89024	0.610008	0.0162763	0.00613497	5.55026	0.807518
comp2248808_c0_seq2_m.37043	-1.89095	-0.904305	0.0161861	0.00617284	5.55026	0.807518
comp2275674_c1_seq1_m.80370	-1.89211	-0.604915	0.0160959	0.00621118	5.55026	0.807518
comp2267209_c0_seq1_m.63399	-1.89525	-0.519457	0.0160056	0.00625	5.55026	0.807518
comp2278536_c1_seq38_m.89884	-1.89928	-0.386144	0.0159154	0.00628931	5.55026	0.807518
comp1226347_c0_seq1_m.1231	1.63048	0.292433	0.0244521	0.0083682	5.55026	0.807518
comp2267172_c0_seq1_m.63318	1.63466	0.338865	0.0243618	0.00840336	5.55026	0.807518
comp2265386_c0_seq2_m.60299	1.63871	0.539267	0.0242716	0.00843882	5.55026	0.807518
comp2272519_c1_seq3_m.73361	-1.6413	-0.303119	0.0240075	0.00847458	5.55026	0.807518
comp2254394_c0_seq2_m.43926	-1.6434	-0.312774	0.0239173	0.00851064	5.55026	0.807518
comp2271257_c1_seq1_m.70699	-1.64586	-0.399507	0.0238271	0.00854701	5.55026	0.807518
comp2252746_c0_seq1_m.41651	-1.65086	-0.34725	0.0236494	0.00858369	5.55026	0.807518
comp2263768_c0_seq2_m.57843	-1.5991	-0.423263	0.0254521	0.0120482	5.55026	0.807518
comp2263346_c1_seq31_m.57192	-1.60043	-0.31281	0.0253618	0.0120968	5.55026	0.807518
comp2275508_c1_seq3_m.80009	-1.60446	-0.618945	0.0252716	0.0121457	5.55026	0.807518
comp2262281_c0_seq3_m.55504	-1.6074	-0.568907	0.0251814	0.0121951	5.55026	0.807518
comp2273865_c0_seq2_m.76255	1.61069	0.439861	0.0250912	0.0122449	5.55026	0.807518
comp2257070_c0_seq2_m.47512	-1.61497	-0.563983	0.0250009	0.0122951	5.55026	0.807518
comp2254426_c0_seq1_m.43954	-1.61663	-0.434169	0.0249107	0.0123457	5.55026	0.807518
comp2253856_c0_seq1_m.43254	-1.61825	-0.315564	0.0248205	0.0123967	5.55026	0.807518
comp2268857_c0_seq2_m.66328	-1.62037	-0.325489	0.0247303	0.0124481	5.55026	0.807518
comp2261876_c0_seq1_m.54865	-1.62786	-0.31557	0.02464	0.0125	5.55026	0.807518
comp2268441_c0_seq1_m.65632	1.55789	0.610764	0.0276664	0.0132075	5.55026	0.807518
comp2272299_c0_seq11_m.72914	-1.55814	-0.446124	0.0275761	0.0132576	5.55026	0.807518
comp2248226_c3_seq1_m.36365	1.55835	0.299898	0.0274859	0.013308	5.55026	0.807518
comp2277729_c0_seq10_m.86207	-1.55854	-0.530447	0.0273957	0.0133588	5.55026	0.807518
comp2277977_c1_seq3_m.87126	-1.56557	-0.274526	0.0272162	0.01341	5.55026	0.807518
comp2258619_c0_seq2_m.49656	1.56701	0.340814	0.0271259	0.0134615	5.55026	0.807518
comp2272724_c0_seq1_m.73818	-1.56958	-0.277379	0.0270357	0.0135135	5.55026	0.807518
comp2276302_c0_seq1_m.82036	1.57171	0.323605	0.0269455	0.0135659	5.55026	0.807518
comp2241424_c0_seq3_m.29932	-1.57603	-0.4212	0.0266607	0.0136187	5.55026	0.807518
comp2268417_c0_seq2_m.65592	-1.57878	-0.480549	0.0265705	0.0136719	5.55026	0.807518
comp2258014_c0_seq1_m.48797	-1.57966	-0.605063	0.0264803	0.0137255	5.55026	0.807518
comp1335339_c0_seq2_m.1954	1.58446	0.299516	0.0262829	0.0137795	5.55026	0.807518
comp2271535_c0_seq1_m.71319	1.58939	0.327209	0.0261927	0.013834	5.55026	0.807518
comp2274043_c0_seq7_m.76739	-1.58971	-0.440504	0.026015	0.0138889	5.55026	0.807518
comp2271413_c1_seq5_m.70995	-1.59107	-0.337732	0.0259248	0.0139442	5.55026	0.807518
gnl_Pdu_trscr_assembly_1_16681_m.81096	-1.59574	-0.255083	0.02564	0.014	5.55026	0.807518
comp2256770_c0_seq1_m.46959	1.53977	0.37262	0.0282998	0.0148699	5.55026	0.807518
comp2274446_c0_seq19_m.77642	-1.54399	-0.293431	0.0282096	0.0149254	5.55026	0.807518
comp2269326_c0_seq2_m.67220	-1.55223	-0.291017	0.028032	0.0149813	5.55026	0.807518
comp2278031_c0_seq2_m.87291	1.55271	0.307118	0.0279417	0.0150376	5.55026	0.807518
comp2272842_c0_seq2_m.74081	-1.46614	-0.512114	0.0316795	0.0153584	5.55026	0.807518
comp2274278_c0_seq6_m.77267	-1.46764	-0.363687	0.0315893	0.015411	5.55026	0.807518
comp2272863_c1_seq5_m.74143	-1.46855	-0.247423	0.0314991	0.0154639	5.55026	0.807518
comp2275478_c0_seq7_m.79935	1.46945	0.331505	0.0314088	0.0155172	5.55026	0.807518
comp2276741_c0_seq2_m.83166	1.46947	0.251465	0.0313186	0.0155709	5.55026	0.807518
comp2278133_c0_seq3_m.87701	1.47223	0.334445	0.0311391	0.015625	5.55026	0.807518
comp2278471_c0_seq8_m.89279	1.47801	0.328295	0.0309615	0.0156794	5.55026	0.807518
comp2270828_c0_seq11_m.69939	-1.48439	-0.364307	0.0306936	0.0157343	5.55026	0.807518
comp2263347_c0_seq2_m.57195	1.4886	0.327642	0.0306034	0.0157895	5.55026	0.807518
comp2274748_c1_seq11_m.78259	-1.49235	-0.266311	0.0305132	0.0158451	5.55026	0.807518
comp2266801_c0_seq2_m.62707	1.49553	0.303335	0.0302415	0.0159011	5.55026	0.807518
comp2277724_c0_seq10_m.86198	-1.49642	-0.360428	0.0301513	0.0159574	5.55026	0.807518
comp2278363_c0_seq7_m.88713	-1.50129	-0.304559	0.0299737	0.0160142	5.55026	0.807518
comp2271319_c0_seq2_m.70822	1.50568	0.35003	0.0298835	0.0160714	5.55026	0.807518
comp2274806_c0_seq1_m.78376	-1.51318	-0.528201	0.029688	0.016129	5.55026	0.807518
comp2265589_c0_seq2_m.60673	1.51344	0.245805	0.0295977	0.0161871	5.55026	0.807518
comp2276491_c0_seq8_m.82522	1.51392	0.246998	0.0295075	0.0162455	5.55026	0.807518
comp2259823_c0_seq1_m.51564	1.51695	0.355697	0.0294173	0.0163043	5.55026	0.807518
comp2265735_c0_seq4_m.60895	-1.51718	-0.242763	0.0293271	0.0163636	5.55026	0.807518
comp2246119_c0_seq1_m.34306	1.52211	0.354386	0.0291297	0.0164234	5.55026	0.807518
comp2264066_c0_seq3_m.58370	-1.52324	-0.401409	0.0290395	0.0164835	5.55026	0.807518
comp2260797_c0_seq1_m.53088	1.5238	0.233688	0.0289492	0.0165441	5.55026	0.807518
comp2273193_c0_seq1_m.74830	-1.53219	-0.532961	0.0287716	0.0166052	5.55026	0.807518
comp2277475_c0_seq2_m.85365	-1.53268	-0.380974	0.0286814	0.0166667	5.55026	0.807518
comp2259349_c0_seq2_m.50877	-1.44455	-0.429074	0.0326974	0.0167224	5.55026	0.807518
comp2278378_c0_seq4_m.88778	-1.44492	-0.467551	0.0326071	0.0167785	5.55026	0.807518
comp2244968_c0_seq1_m.33120	1.44962	0.507645	0.0324201	0.016835	5.55026	0.807518
comp2265049_c0_seq3_m.59764	1.4503	0.439623	0.0321353	0.0168919	5.55026	0.807518
comp2277388_c0_seq8_m.85093	-1.45389	-0.513666	0.0320451	0.0169492	5.55026	0.807518
comp2258554_c1_seq2_m.49570	-1.46083	-0.522053	0.0318665	0.0170068	5.55026	0.807518
comp2272124_c0_seq1_m.72532	-1.41822	-0.369645	0.0346635	0.0209003	5.55026	0.807518
comp2259221_c0_seq1_m.50687	1.41871	0.375544	0.0345733	0.0209677	5.55026	0.807518
gnl_Pdu_trscr_assembly_1_1986_m.5697	-1.41935	-0.323397	0.0344831	0.0210356	5.55026	0.807518
comp2276966_c0_seq13_m.83854	-1.42074	-0.275828	0.0343929	0.0211039	5.55026	0.807518
gnl_Pdu_trscr_assembly_1_2615_m.68529	1.4233	0.267704	0.0341955	0.0211726	5.55026	0.807518
comp2279297_c0_seq1_m.91091	1.4297	0.261345	0.0338092	0.0212418	5.55026	0.807518
gnl_Pdu_trscr_assembly_1_17807_m.62055	1.43166	0.259651	0.033719	0.0213115	5.55026	0.807518
comp2273595_c0_seq1_m.75667	-1.43305	-0.271567	0.0336288	0.0213816	5.55026	0.807518
comp2273900_c0_seq1_m.76336	1.43326	0.252656	0.0335385	0.0214521	5.55026	0.807518
comp2274106_c1_seq2_m.76871	-1.43327	-0.452603	0.0334483	0.0215232	5.55026	0.807518
comp2258349_c0_seq1_m.49321	-1.43712	-0.258319	0.0333581	0.0215947	5.55026	0.807518
comp2274819_c0_seq2_m.78403	1.44106	0.313158	0.0332679	0.0216667	5.55026	0.807518
comp1769718_c0_seq1_m.2239	1.39057	0.317064	0.0362472	0.0232919	5.55026	0.807518
comp2274295_c0_seq2_m.77311	-1.39121	-0.461586	0.036157	0.0233645	5.55026	0.807518
comp2141229_c0_seq1_m.7283	-1.3915	-0.315238	0.0360667	0.0234375	5.55026	0.807518
comp2253077_c0_seq1_m.42045	1.39408	0.232842	0.0359765	0.023511	5.55026	0.807518
comp2275625_c0_seq11_m.80264	-1.39664	-0.489228	0.0358863	0.0235849	5.55026	0.807518
comp2269201_c0_seq1_m.67004	-1.40084	-0.611753	0.0356908	0.0236593	5.55026	0.807518
comp2276743_c0_seq1_m.83169	1.40227	0.28123	0.0356006	0.0237342	5.55026	0.807518
comp2254206_c0_seq1_m.43646	1.407	0.322356	0.0354126	0.0238095	5.55026	0.807518
comp2266755_c0_seq1_m.62616	1.40951	0.585204	0.0353224	0.0238854	5.55026	0.807518
comp2278012_c0_seq11_m.87235	-1.40967	-0.501876	0.0352321	0.0239617	5.55026	0.807518
comp2271350_c0_seq18_m.70897	1.41096	0.451084	0.0351419	0.0240385	5.55026	0.807518
comp2278238_c0_seq6_m.88188	1.38195	0.30204	0.0370921	0.0246154	5.55026	0.807518
comp2248254_c1_seq2_m.36433	1.38226	0.509065	0.0369145	0.0246914	5.55026	0.807518
comp2275974_c0_seq18_m.81146	-1.38875	-0.530872	0.0366316	0.0247678	5.55026	0.807518
comp2258349_c0_seq1_m.49322	-1.37662	-0.378293	0.037547	0.0259146	5.55026	0.807518
comp2270576_c0_seq1_m.69463	1.37707	0.408164	0.0374568	0.0259939	5.55026	0.807518
comp2273519_c1_seq9_m.75533	1.37723	0.373664	0.0373665	0.0260736	5.55026	0.807518
comp2272433_c0_seq1_m.73197	1.36008	0.283037	0.03836	0.027027	5.55026	0.807518
comp2262927_c0_seq2_m.56544	1.36016	0.290588	0.0382697	0.0271084	5.55026	0.807518
comp2273204_c0_seq26_m.74869	-1.3668	-0.339311	0.0379944	0.0271903	5.55026	0.807518
comp2274517_c0_seq1_m.77807	1.36709	0.259201	0.0379041	0.0272727	5.55026	0.807518
comp2272876_c0_seq2_m.74167	1.37562	0.342996	0.0377265	0.0273556	5.55026	0.807518
comp2259918_c0_seq1_m.51762	1.34662	0.259171	0.0393487	0.0281899	5.55026	0.807518
comp2272807_c0_seq4_m.74003	-1.34843	-0.270795	0.0391711	0.0282738	5.55026	0.807518
comp2262197_c0_seq1_m.55346	1.35012	0.409379	0.0390808	0.0283582	5.55026	0.807518
comp2250982_c0_seq1_m.39507	1.35347	0.215733	0.0387979	0.0284431	5.55026	0.807518
comp2257601_c0_seq2_m.48241	-1.34132	-0.224596	0.0396231	0.0295858	5.55026	0.807518
comp2143334_c0_seq2_m.7649	1.33385	0.284477	0.0404342	0.0307018	5.55026	0.807518
gnl_Pdu_trscr_assembly_1_19681_m.92605	1.33402	0.347269	0.040344	0.0307918	5.55026	0.807518
comp2273249_c0_seq4_m.74967	-1.33406	-0.378853	0.0402538	0.0308824	5.55026	0.807518
comp2272371_c0_seq1_m.73054	-1.33813	-0.270171	0.0398102	0.0309735	5.55026	0.807518
comp2278306_c0_seq2_m.88465	-1.30893	-0.207629	0.0423647	0.0309859	5.55026	0.807518
comp2279748_c0_seq1_m.91174	1.30932	0.304482	0.0422744	0.0310734	5.55026	0.807518
comp2256252_c0_seq1_m.46348	-1.31036	-0.426281	0.0420968	0.0311615	5.55026	0.807518
comp2276634_c1_seq3_m.82935	1.31412	0.372519	0.0418045	0.03125	5.55026	0.807518
comp2268874_c0_seq62_m.66354	-1.31444	-0.229953	0.0417143	0.031339	5.55026	0.807518
comp2267341_c0_seq1_m.63653	1.31834	0.33375	0.0416241	0.0314286	5.55026	0.807518
comp2276498_c0_seq1_m.82544	-1.3186	-0.32064	0.0415338	0.0315186	5.55026	0.807518
comp2253217_c0_seq2_m.42336	-1.31936	-0.225702	0.0414436	0.0316092	5.55026	0.807518
comp2228369_c0_seq1_m.21627	-1.32029	-0.290015	0.0412566	0.0317003	5.55026	0.807518
comp2277501_c0_seq23_m.85461	-1.32508	-0.266117	0.0411664	0.0317919	5.55026	0.807518
comp2274137_c1_seq25_m.76929	1.32523	0.417336	0.0410761	0.0318841	5.55026	0.807518
comp2269158_c0_seq1_m.66914	1.3297	0.353373	0.0407115	0.0319767	5.55026	0.807518
comp2268798_c0_seq2_m.66233	1.32978	0.483708	0.0406212	0.03207	5.55026	0.807518
comp2268937_c0_seq1_m.66472	1.27436	0.308763	0.04425	0.0416667	5.55026	0.807518
comp2241992_c0_seq1_m.30524	1.27742	0.314803	0.0439756	0.0417827	5.55026	0.807518
comp2278605_c1_seq8_m.90480	-1.27908	-0.406855	0.0438853	0.0418994	5.55026	0.807518
comp2271755_c0_seq2_m.71808	1.28793	0.299315	0.0437058	0.0420168	5.55026	0.807518
tuba_m.92505	1.2927	0.430659	0.0433261	0.0421348	5.55026	0.807518
comp2287273_c0_seq1_contamination_m.91384	1.27003	0.311837	0.0450357	0.0443213	5.55026	0.807518
comp2237757_c0_seq1_m.27251	1.24645	0.230936	0.0473083	0.0459459	5.55026	0.807518
comp2268340_c1_seq1_m.65478	1.24671	0.277867	0.047218	0.0460705	5.55026	0.807518
comp2280536_c0_seq1_m.91231	1.25563	0.294425	0.0467481	0.0461957	5.55026	0.807518
comp2276577_c0_seq8_m.92288	1.25782	0.269974	0.0464624	0.0463215	5.55026	0.807518
comp2277374_c0_seq2_m.85051	1.2605	0.35892	0.0462669	0.0464481	5.55026	0.807518
comp2261047_c0_seq1_m.53653	-1.26057	-0.323994	0.0461767	0.0465753	5.55026	0.807518
comp2266675_c0_seq1_m.62468	1.26113	0.463624	0.0460865	0.0467033	5.55026	0.807518
comp2259363_c0_seq16_m.50888	1.26252	0.271971	0.045891	0.046832	5.55026	0.807518
comp2266680_c0_seq1_m.62479	-1.26318	-0.243405	0.0458008	0.0469613	5.55026	0.807518
comp2252790_c0_seq1_m.41691	1.23695	0.418767	0.0484286	0.0509383	5.55026	0.807518
comp2277230_c0_seq15_m.84634	-1.23771	-0.27634	0.0483383	0.0510753	5.55026	0.807518
comp2257633_c0_seq1_m.48279	-1.24211	-0.239688	0.0479774	0.0512129	5.55026	0.807518
comp1194322_c0_seq2_m.793	1.22959	0.228742	0.0493553	0.0533333	5.55026	0.807518
comp2280694_c0_seq1_m.91236	1.23209	0.462139	0.049062	0.0534759	5.55026	0.807518
comp2265494_c0_seq1_m.60519	1.22482	0.405976	0.0500188	0.0582011	5.55026	0.807518
comp2276166_c0_seq8_m.81705	1.22549	0.386879	0.0499286	0.0583554	5.55026	0.807518
comp2236614_c0_seq1_m.26450	-1.22591	-0.471926	0.0498383	0.0585106	5.55026	0.807518
comp2277337_c0_seq4_m.84929	1.20472	0.190416	0.0516288	0.0600522	5.55026	0.807518
comp2272691_c0_seq4_m.73750	-1.21208	-0.429842	0.051344	0.0602094	5.55026	0.807518
comp2277388_c0_seq8_m.85092	-1.21299	-0.380885	0.0510648	0.0603675	5.55026	0.807518
comp2138816_c0_seq1_m.6842	-1.2133	-0.48567	0.0508891	0.0605263	5.55026	0.807518
comp2275698_c0_seq5_m.80432	-1.21399	-0.311101	0.0507989	0.060686	5.55026	0.807518
comp2250550_c1_seq1_m.39064	-1.1959	-0.388669	0.0526278	0.0618557	5.55026	0.807518
comp2269374_c0_seq3_m.67298	-1.20023	-0.210411	0.0521767	0.0620155	5.55026	0.807518
gnl_Pdu_trscr_assembly_1_20144_m.60515	1.20033	0.332207	0.0520865	0.0621762	5.55026	0.807518
comp2278194_c0_seq1_m.87981	-1.20219	-0.291399	0.051907	0.0623377	5.55026	0.807518
comp2233777_c0_seq1_m.24586	-1.20385	-0.21672	0.0518167	0.0625	5.55026	0.807518
comp2266714_c1_seq1_m.62532	1.18584	0.284036	0.0537509	0.0637755	5.55026	0.807518
comp2269987_c0_seq2_m.68354	1.18884	0.20312	0.0535714	0.0639386	5.55026	0.807518
comp2267483_c0_seq3_m.63903	-1.19323	-0.307723	0.0531165	0.0641026	5.55026	0.807518
comp2269029_c1_seq11_m.66661	-1.1945	-0.178084	0.0530263	0.0642674	5.55026	0.807518
comp2247176_c0_seq3_m.35337	-1.17413	-0.200781	0.0547932	0.0656566	5.55026	0.807518
comp2250533_c0_seq1_m.39039	-1.17596	-0.243115	0.0544981	0.0658228	5.55026	0.807518
comp2272583_c0_seq2_m.73488	-1.17897	-0.173171	0.0543205	0.0659898	5.55026	0.807518
comp2251346_c0_seq1_m.39994	-1.1793	-0.272328	0.0542303	0.0661578	5.55026	0.807518
comp2269848_c0_seq4_m.68115	-1.17269	-0.322439	0.055078	0.0680101	5.55026	0.807518
comp2276668_c0_seq1_m.83017	-1.15193	-0.335425	0.0575789	0.0712531	5.55026	0.807518
comp2142866_c0_seq1_m.7576	1.15397	0.327651	0.0572049	0.0714286	5.55026	0.807518
comp2270458_c0_seq1_m.69251	-1.15613	-0.276564	0.0571147	0.0716049	5.55026	0.807518
comp2270905_c1_seq5_m.70069	-1.16003	-0.240313	0.0568506	0.0717822	5.55026	0.807518
comp2245687_c1_seq1_m.33822	1.16218	0.435205	0.0565573	0.0719603	5.55026	0.807518
comp2269773_c0_seq6_m.68002	1.16423	0.163614	0.0563788	0.0721393	5.55026	0.807518
comp2278238_c1_seq2_m.88191	1.16543	0.199036	0.0561814	0.0723192	5.55026	0.807518
comp2280482_c0_seq1_m.91228	-1.16672	-0.298027	0.0560912	0.0725	5.55026	0.807518
comp2245511_c0_seq1_m.33658	-1.16939	-0.344381	0.055719	0.0726817	5.55026	0.807518
comp2263771_c0_seq2_m.57851	1.16942	0.210071	0.0556288	0.0728643	5.55026	0.807518
comp2272293_c0_seq1_m.72898	1.1373	0.201874	0.0601034	0.0746988	5.55026	0.807518
comp2276160_c0_seq4_m.81678	-1.13771	-0.295452	0.0600132	0.0748792	5.55026	0.807518
comp2270372_c0_seq1_m.69078	1.13834	0.238564	0.0599229	0.0750605	5.55026	0.807518
comp2275406_c1_seq7_m.79751	1.14063	0.232232	0.0597274	0.0752427	5.55026	0.807518
comp2270385_c0_seq11_m.69105	1.14092	0.287065	0.0595395	0.0754258	5.55026	0.807518
comp2139380_c0_seq1_m.6935	1.14258	0.328559	0.0592444	0.0756098	5.55026	0.807518
comp2268942_c0_seq5_m.66483	-1.14667	-0.304502	0.058515	0.0757946	5.55026	0.807518
comp2263928_c0_seq2_m.58107	1.14838	0.336845	0.0584248	0.0759804	5.55026	0.807518
comp2277816_c0_seq2_m.86536	-1.11185	-0.254595	0.0640855	0.0765661	5.55026	0.807518
comp2237053_c0_seq1_m.26700	1.11268	0.277016	0.0639953	0.0767442	5.55026	0.807518
comp2269814_c0_seq1_m.68069	1.11431	0.221739	0.0636269	0.0769231	5.55026	0.807518
comp2277163_c0_seq1_m.84431	-1.11879	-0.214104	0.0629746	0.0771028	5.55026	0.807518
comp2276805_c0_seq8_m.83380	-1.09387	-0.198506	0.0664511	0.0772727	5.55026	0.807518
comp2273667_c0_seq6_m.75821	1.11961	0.203212	0.0627049	0.0772834	5.55026	0.807518
gnl_Pdu_trscr_assembly_1_1644_m.62862	-1.0941	-0.22699	0.0663609	0.0774487	5.55026	0.807518
comp1953876_c0_seq1_m.3493	1.12037	0.410495	0.0626147	0.0774648	5.55026	0.807518
comp2271753_c0_seq2_m.71801	-1.09653	-0.216193	0.0661852	0.0776256	5.55026	0.807518
comp2234079_c0_seq2_m.24745	1.12332	0.272289	0.0622321	0.0776471	5.55026	0.807518
comp2265462_c0_seq5_m.60462	-1.09691	-0.241456	0.0660066	0.0778032	5.55026	0.807518
comp2242407_c0_seq1_m.30845	-1.12417	-0.554103	0.0620367	0.0778302	5.55026	0.807518
comp2273645_c0_seq11_m.75781	1.09856	0.286289	0.0657237	0.0779817	5.55026	0.807518
comp2256558_c1_seq1_m.46706	-1.12495	-0.315467	0.0619464	0.0780142	5.55026	0.807518
comp2347711_c0_seq1_contamination_m.91628	-1.09962	-0.298456	0.0655442	0.0781609	5.55026	0.807518
comp2271594_c0_seq8_m.71451	-1.12507	-0.38272	0.0618562	0.0781991	5.55026	0.807518
comp2275457_c1_seq8_m.79890	1.09966	0.26644	0.0654539	0.078341	5.55026	0.807518
comp2278454_c0_seq1_m.89160	-1.12889	-0.289765	0.0614934	0.0783848	5.55026	0.807518
comp2276202_c0_seq3_m.81780	1.10091	0.306001	0.0652782	0.0785219	5.55026	0.807518
comp2273845_c0_seq2_m.76206	1.129	0.273695	0.0614032	0.0785714	5.55026	0.807518
comp2271675_c0_seq2_m.71655	1.11	0.38547	0.0644492	0.0787037	5.55026	0.807518
comp2263950_c0_seq2_m.58147	1.131	0.302479	0.060938	0.0787589	5.55026	0.807518
comp2270996_c0_seq5_m.70236	1.13454	0.378946	0.0606551	0.0789474	5.55026	0.807518
comp2275295_c1_seq2_m.79482	1.13607	0.467452	0.0605648	0.0791367	5.55026	0.807518
comp2277413_c0_seq4_m.85165	-1.13652	-0.263297	0.0604746	0.0793269	5.55026	0.807518
comp2267691_c0_seq1_m.64257	-1.08607	-0.252123	0.0676805	0.0812641	5.55026	0.807518
comp2275191_c1_seq2_m.79282	1.08779	0.261451	0.0675902	0.081448	5.55026	0.807518
comp2265923_c0_seq1_m.61202	-1.08873	-0.301773	0.0675	0.0816327	5.55026	0.807518
comp2107035_c0_seq2_m.6021	-1.08046	-0.205581	0.068719	0.0853933	5.55026	0.807518
comp2261058_c0_seq1_m.53667	1.08139	0.227105	0.0685414	0.0855856	5.55026	0.807518
comp2273028_c0_seq3_m.74502	-1.07392	-0.349845	0.069907	0.0870536	5.55026	0.807518
comp1194294_c0_seq1_m.785	1.07856	0.287391	0.0693919	0.0872483	5.55026	0.807518
comp2247229_c0_seq1_m.35389	1.07891	0.22823	0.0693017	0.0874439	5.55026	0.807518
comp2277312_c0_seq10_m.84862	1.07032	0.251867	0.070375	0.0890869	5.55026	0.807518
comp1194290_c0_seq1_m.781	1.06763	0.22566	0.0711927	0.0911111	5.55026	0.807518
comp2277951_c0_seq2_m.87004	-1.0585	-0.235764	0.0728656	0.0917031	5.55026	0.807518
comp2261980_c0_seq3_m.55041	-1.06027	-0.188842	0.0727754	0.0919037	5.55026	0.807518
comp2254566_c0_seq1_m.44122	-1.06071	-0.192323	0.0726852	0.0921053	5.55026	0.807518
comp2251866_c0_seq1_m.40557	-1.06103	-0.189501	0.0725949	0.0923077	5.55026	0.807518
comp2212572_c0_seq1_m.15390	1.06312	0.202956	0.0720301	0.092511	5.55026	0.807518
comp2253875_c0_seq1_m.43271	1.06371	0.272076	0.0718327	0.0927152	5.55026	0.807518
comp2239935_c0_seq1_m.28757	-1.06373	-0.253179	0.0717425	0.0929204	5.55026	0.807518
comp2275853_c0_seq1_m.80817	1.06381	0.267652	0.0716523	0.0931264	5.55026	0.807518
comp2277505_c0_seq1_m.85479	1.05274	0.204202	0.0737932	0.0952381	5.55026	0.807518
comp2267968_c0_seq2_m.64758	-1.05363	-0.291627	0.0736053	0.0954447	5.55026	0.807518
comp2278480_c1_seq1_m.89333	-1.05427	-0.290227	0.0733374	0.0956522	5.55026	0.807518
comp2140166_c0_seq1_m.7086	1.05469	0.261125	0.0732472	0.0958606	5.55026	0.807518
comp2187328_c0_seq1_m.10936	-1.04695	-0.289666	0.0750959	0.0989247	5.55026	0.807518
comp2276151_c0_seq3_m.81648	1.04699	0.200468	0.0750056	0.0991379	5.55026	0.807518
comp1201878_c0_seq1_m.1138	-1.04774	-0.212441	0.0748299	0.0993521	5.55026	0.807518

## Sheet: PM_NM_Female vs M_NM_Female
	d	logFC	pvalue	FDR	Z	R
comp1194290_c0_seq1_m.781	1.86737	0.860966	0.00928477	0	6.03719	0.814654
comp1197507_c0_seq1_m.1032	2.17248	0.640775	0.00559398	0	6.03719	0.814654
comp1326513_c0_seq1_m.1923	1.91503	0.844092	0.00865602	0	6.03719	0.814654
comp1781461_c0_seq1_m.2253	-1.75116	-0.558166	0.0116306	0	6.03719	0.814654
comp1838578_c0_seq1_m.2293	2.48977	0.822956	0.00315789	0	6.03719	0.814654
comp1910314_c0_seq1_m.2848	1.84529	0.521448	0.00946523	0	6.03719	0.814654
comp1945561_c0_seq2_m.3380	-2.1395	-0.606118	0.00595207	0	6.03719	0.814654
comp1965369_c0_seq1_contamination_m.3664	2.34854	0.66013	0.0042406	0	6.03719	0.814654
comp2004487_c0_seq1_m.4269	2.0893	0.721481	0.00694455	0	6.03719	0.814654
comp2138952_c0_seq1_m.6867	-1.79544	-0.511441	0.0105479	0	6.03719	0.814654
comp2141997_c0_seq1_m.7386	-1.65513	-0.978575	0.0137058	0	6.03719	0.814654
comp2143411_c0_seq1_m.7656	1.55874	0.43386	0.0161306	0	6.03719	0.814654
comp2189372_c0_seq1_m.11219	1.97563	0.445712	0.00784398	0	6.03719	0.814654
comp2203251_c0_seq1_m.13504	-1.69286	-0.401644	0.0130742	0	6.03719	0.814654
comp2204754_c0_seq1_m.13720	-1.7597	-0.471879	0.01136	0	6.03719	0.814654
comp2208474_c0_seq1_m.14351	3.34591	1.04213	0.000721805	0	6.03719	0.814654
comp2221095_c0_seq1_m.18558	-1.4449	-0.463416	0.0200028	0	6.03719	0.814654
comp2222959_c0_seq1_m.19328	1.67654	0.579403	0.0132547	0	6.03719	0.814654
comp2223962_c0_seq7_m.19686	1.96557	0.548215	0.00802444	0	6.03719	0.814654
comp2224014_c0_seq1_m.19704	1.77422	0.66801	0.0110893	0	6.03719	0.814654
comp2225664_c0_seq1_m.20382	-1.71319	-0.487555	0.0124427	0	6.03719	0.814654
comp2229729_c0_seq1_m.22264	-1.43238	-0.529513	0.0204577	0	6.03719	0.814654
comp2232290_c0_seq2_m.23637	-2.13118	-1.14499	0.00622274	0	6.03719	0.814654
comp2233700_c1_seq1_m.24550	-1.46961	-0.7633	0.0190141	0	6.03719	0.814654
comp2234282_c0_seq1_m.24908	2.97588	0.653067	0.00108271	0	6.03719	0.814654
comp2235681_c0_seq1_m.25791	1.35503	0.565966	0.0235996	0	6.03719	0.814654
comp2236007_c0_seq2_m.26049	1.4027	0.539864	0.0213524	0	6.03719	0.814654
comp2236614_c0_seq1_m.26450	-2.70217	-1.03147	0.00189474	0	6.03719	0.814654
comp2238188_c0_seq1_m.27576	1.92074	0.68582	0.00856579	0	6.03719	0.814654
comp2239691_c0_seq1_m.28548	-1.82692	-0.672938	0.0097359	0	6.03719	0.814654
comp2242933_c0_seq1_m.31351	6.10183	1.7154	9.02256e-05	0	6.03719	0.814654
comp2244437_c0_seq1_m.32653	1.46876	0.396652	0.0191043	0	6.03719	0.814654
comp2244968_c0_seq1_m.33120	2.07155	0.639779	0.00721241	0	6.03719	0.814654
comp2245014_c0_seq2_m.33157	2.6438	0.851641	0.00225564	0	6.03719	0.814654
comp2245053_c0_seq1_m.33185	-1.68038	-0.558365	0.0131645	0	6.03719	0.814654
comp2245721_c0_seq1_m.33844	1.5472	0.509802	0.0164013	0	6.03719	0.814654
comp2247988_c0_seq1_m.36173	-1.89886	-0.533112	0.00892669	0	6.03719	0.814654
comp2249227_c0_seq1_m.37479	1.63487	0.376157	0.0140667	0	6.03719	0.814654
comp2251386_c0_seq2_m.40044	1.61118	0.483229	0.0149633	0	6.03719	0.814654
comp2251594_c0_seq1_m.40214	1.46698	0.470784	0.0191945	0	6.03719	0.814654
comp2251806_c0_seq1_m.40480	2.1821	0.543963	0.00550376	0	6.03719	0.814654
comp2252186_c0_seq3_m.40915	2.65277	0.951559	0.00216541	0	6.03719	0.814654
comp2252318_c0_seq1_m.41154	1.61437	0.434324	0.0148731	0	6.03719	0.814654
comp2253217_c0_seq2_m.42336	1.59444	0.498387	0.0154117	0	6.03719	0.814654
comp2253516_c0_seq4_m.42708	-1.72	-0.912918	0.0122622	0	6.03719	0.814654
comp2253856_c0_seq1_m.43254	1.9265	0.538411	0.00838534	0	6.03719	0.814654
comp2254167_c0_seq1_m.43587	1.48705	0.473842	0.0183882	0	6.03719	0.814654
comp2254206_c0_seq1_m.43646	1.37177	0.37241	0.0226983	0	6.03719	0.814654
comp2254456_c0_seq2_m.43993	-1.75269	-0.481569	0.0115404	0	6.03719	0.814654
comp2254470_c0_seq1_m.44006	-1.61015	-0.366154	0.0150536	0	6.03719	0.814654
comp2254477_c0_seq1_m.44015	1.80099	0.595438	0.0104577	0	6.03719	0.814654
comp2254675_c0_seq1_m.44244	1.64235	0.44963	0.0138863	0	6.03719	0.814654
comp2256041_c0_seq1_m.46046	1.39031	0.368699	0.0217133	0	6.03719	0.814654
comp2256095_c0_seq1_m.46136	-1.32367	-0.432115	0.0246758	0	6.03719	0.814654
comp2256220_c0_seq1_m.46316	-1.7335	-0.539345	0.0119013	0	6.03719	0.814654
comp2256252_c0_seq1_m.46348	-1.33699	-0.931241	0.0242246	0	6.03719	0.814654
comp2257070_c0_seq2_m.47512	-2.06	-1.17606	0.00730263	0	6.03719	0.814654
comp2257070_c0_seq2_m.47513	-1.73184	-0.71191	0.0119915	0	6.03719	0.814654
comp2257131_c0_seq2_m.47590	1.40441	0.515422	0.0212622	0	6.03719	0.814654
comp2257395_c0_seq4_m.47951	-3.28596	-1.73408	0.00081203	0	6.03719	0.814654
comp2257487_c0_seq1_m.48064	2.10763	0.46094	0.00667387	0	6.03719	0.814654
comp2257585_c0_seq1_m.48216	-1.52478	-0.445657	0.0169427	0	6.03719	0.814654
comp2257674_c0_seq1_m.48339	-2.11893	-1.0314	0.00649342	0	6.03719	0.814654
comp2257781_c0_seq1_m.48513	-1.37897	-0.343703	0.0223374	0	6.03719	0.814654
comp2257905_c0_seq1_m.48664	1.31812	0.32258	0.0248562	0	6.03719	0.814654
comp2257939_c0_seq1_m.48703	1.43172	0.442183	0.0205479	0	6.03719	0.814654
comp2258193_c0_seq1_m.49089	1.4941	0.398936	0.0178468	0	6.03719	0.814654
comp2258554_c0_seq1_m.49568	-1.9706	-0.466722	0.00793421	0	6.03719	0.814654
comp2258554_c1_seq2_m.49570	-1.50432	-0.455412	0.0174887	0	6.03719	0.814654
comp2260058_c0_seq1_m.51934	2.37165	0.705242	0.0038797	0	6.03719	0.814654
comp2260394_c0_seq1_m.52394	1.70201	0.442751	0.0128036	0	6.03719	0.814654
comp2260797_c0_seq1_m.53088	1.50225	0.391714	0.0175789	0	6.03719	0.814654
comp2261362_c0_seq2_m.54116	-1.70231	-0.454644	0.0127133	0	6.03719	0.814654
comp2261395_c0_seq1_m.54150	-2.43707	-0.622342	0.00360902	0	6.03719	0.814654
comp2261399_c0_seq2_m.54155	-2.6272	-1.1175	0.00243609	0	6.03719	0.814654
comp2261623_c0_seq1_m.54431	-2.18513	-0.697252	0.00532331	0	6.03719	0.814654
comp2261716_c0_seq2_m.54597	-1.84032	-0.607849	0.00964568	0	6.03719	0.814654
comp2261876_c0_seq1_m.54865	-2.32107	-1.01171	0.00451128	0	6.03719	0.814654
comp2262137_c0_seq3_m.92268	-3.36982	-1.13615	0.000631579	0	6.03719	0.814654
comp2262137_c0_seq4_m.55246	-4.31873	-1.16919	0.000270677	0	6.03719	0.814654
comp2262281_c0_seq3_m.55504	-2.04006	-0.90279	0.00739286	0	6.03719	0.814654
comp2262339_c0_seq1_m.55609	1.77428	0.503451	0.0109991	0	6.03719	0.814654
comp2262465_c0_seq5_m.55795	-1.9653	-0.965675	0.00811466	0	6.03719	0.814654
comp2262731_c0_seq1_m.56213	-1.8107	-0.725363	0.010187	0	6.03719	0.814654
comp2263011_c0_seq1_m.56689	2.66464	0.577495	0.00198496	0	6.03719	0.814654
comp2263277_c0_seq1_m.57091	-1.44893	-0.376625	0.0197321	0	6.03719	0.814654
comp2263291_c0_seq2_m.57114	2.46489	0.75861	0.0035188	0	6.03719	0.814654
comp2263394_c0_seq1_m.57263	-1.39954	-0.388393	0.0214427	0	6.03719	0.814654
comp2263658_c0_seq3_m.57592	-1.44211	-0.426433	0.0201805	0	6.03719	0.814654
comp2263667_c0_seq1_m.57601	1.51415	0.457787	0.0172133	0	6.03719	0.814654
comp2263822_c0_seq1_m.57945	1.33914	0.479736	0.0241344	0	6.03719	0.814654
comp2263873_c0_seq9_m.58029	-2.71767	-1.38566	0.00180451	0	6.03719	0.814654
comp2263896_c0_seq3_m.58065	1.6198	0.430079	0.0146024	0	6.03719	0.814654
comp2263921_c0_seq2_m.58101	-2.27692	-0.735964	0.00478195	0	6.03719	0.814654
comp2263928_c0_seq2_m.58107	2.15549	0.686879	0.00577444	0	6.03719	0.814654
comp2264796_c2_seq1_m.59361	1.45989	0.487703	0.0195545	0	6.03719	0.814654
comp2265077_c0_seq1_m.59810	1.47319	0.344041	0.0188365	0	6.03719	0.814654
comp2265326_c0_seq3_m.60204	-2.18383	-0.90106	0.00541353	0	6.03719	0.814654
comp2265386_c0_seq2_m.60299	1.81911	0.659836	0.0100066	0	6.03719	0.814654
comp2265494_c0_seq1_m.60519	1.32567	0.458112	0.0244953	0	6.03719	0.814654
comp2265589_c0_seq2_m.60673	1.78878	0.473239	0.0108186	0	6.03719	0.814654
comp2265656_c0_seq3_m.60780	-2.85728	-1.27816	0.00126316	0	6.03719	0.814654
comp2265885_c0_seq3_m.61143	-2.00799	-0.57823	0.00766353	0	6.03719	0.814654
comp2265897_c0_seq5_m.61166	2.13826	0.447287	0.00613252	0	6.03719	0.814654
comp2266005_c0_seq5_m.61322	-1.6647	-0.500367	0.0136156	0	6.03719	0.814654
comp2266171_c0_seq1_m.61557	1.95009	0.531058	0.00820489	0	6.03719	0.814654
comp2266280_c0_seq1_m.61789	3.01526	0.798441	0.000992481	0	6.03719	0.814654
comp2266512_c0_seq8_m.62145	2.35303	0.524082	0.00406015	0	6.03719	0.814654
comp2266701_c0_seq3_m.62512	-1.37614	-0.927093	0.0224276	0	6.03719	0.814654
comp2266841_c0_seq1_m.62766	-2.20891	-0.452436	0.00514286	0	6.03719	0.814654
comp2267209_c0_seq1_m.63399	-2.09151	-0.561897	0.00685432	0	6.03719	0.814654
comp2267341_c0_seq1_m.63653	2.87831	0.728556	0.00117293	0	6.03719	0.814654
comp2267571_c0_seq4_m.64058	2.1283	0.523217	0.00631297	0	6.03719	0.814654
comp2268115_c0_seq2_m.65034	2.34759	0.622501	0.00433083	0	6.03719	0.814654
comp2268172_c0_seq1_m.65149	1.57227	0.425304	0.0157697	0	6.03719	0.814654
comp2268336_c1_seq1_m.65474	1.44782	0.453118	0.0198224	0	6.03719	0.814654
comp2268340_c1_seq1_m.65478	-1.48982	-0.322845	0.0181175	0	6.03719	0.814654
comp2268441_c0_seq1_m.65632	1.63234	0.577813	0.0142444	0	6.03719	0.814654
comp2268869_c0_seq6_m.66344	-2.4868	-1.18663	0.00324812	0	6.03719	0.814654
comp2268892_c0_seq1_m.66381	-1.84038	-0.462167	0.00955545	0	6.03719	0.814654
comp2268978_c0_seq1_m.66540	-1.48593	-0.892973	0.0185658	0	6.03719	0.814654
comp2269009_c0_seq1_m.66627	1.65228	0.448347	0.0137961	0	6.03719	0.814654
comp2269060_c0_seq1_m.66718	-1.88765	-0.457851	0.00901692	0	6.03719	0.814654
comp2269060_c1_seq1_m.66719	-1.74213	-0.515471	0.0117209	0	6.03719	0.814654
comp2269171_c0_seq3_m.66933	1.81139	0.44775	0.0100968	0	6.03719	0.814654
comp2269297_c0_seq2_m.67181	1.69615	0.649225	0.012984	0	6.03719	0.814654
comp2269321_c1_seq1_m.67212	1.79081	0.478687	0.0107284	0	6.03719	0.814654
comp2269324_c0_seq1_m.67217	1.63743	0.431603	0.0139765	0	6.03719	0.814654
comp2269580_c0_seq1_m.67656	1.39819	0.323767	0.0215329	0	6.03719	0.814654
comp2269698_c0_seq1_m.67864	-1.37567	-0.477483	0.0225179	0	6.03719	0.814654
comp2269850_c0_seq1_m.68122	-1.7648	-0.690623	0.0112697	0	6.03719	0.814654
comp2269906_c0_seq2_m.68214	2.19714	0.612228	0.00523308	0	6.03719	0.814654
comp2269987_c0_seq2_m.68354	-1.4196	-0.422633	0.0210846	0	6.03719	0.814654
comp2270148_c0_seq3_m.68661	1.62907	0.439641	0.0145122	0	6.03719	0.814654
comp2270279_c0_seq7_m.68904	2.54169	0.581673	0.00279699	0	6.03719	0.814654
comp2270404_c0_seq3_m.69137	1.48451	0.393904	0.0187462	0	6.03719	0.814654
comp2270797_c0_seq10_m.69872	-1.32447	-0.30126	0.0245855	0	6.03719	0.814654
comp2271350_c0_seq18_m.70897	2.37743	0.827581	0.00369925	0	6.03719	0.814654
comp2271350_c0_seq18_m.70898	1.38724	0.438085	0.0221598	0	6.03719	0.814654
comp2271539_c0_seq2_m.71326	1.48874	0.426134	0.0182979	0	6.03719	0.814654
comp2271567_c0_seq1_m.71391	-1.61955	-0.581254	0.0146927	0	6.03719	0.814654
comp2271595_c0_seq2_m.71452	-1.53408	-0.440508	0.0167622	0	6.03719	0.814654
comp2271675_c0_seq2_m.71655	-1.67404	-0.673789	0.0133449	0	6.03719	0.814654
comp2271737_c1_seq2_m.71770	2.37301	0.866796	0.00378947	0	6.03719	0.814654
comp2271994_c0_seq2_m.72269	-3.02653	-0.926088	0.000902256	0	6.03719	0.814654
comp2272233_c0_seq1_m.72760	-1.32616	-0.307475	0.0244051	0	6.03719	0.814654
comp2272319_c0_seq24_m.72950	4.29986	1.46128	0.000360902	0	6.03719	0.814654
comp2272437_c1_seq1_m.73204	2.27624	0.939028	0.00487218	0	6.03719	0.814654
comp2272691_c0_seq4_m.73750	-2.5069	-1.36624	0.00297744	0	6.03719	0.814654
comp2272698_c0_seq4_m.73763	3.95271	0.850718	0.000451128	0	6.03719	0.814654
comp2272782_c0_seq2_m.73955	1.80196	0.564909	0.0103675	0	6.03719	0.814654
comp2272882_c0_seq14_m.74184	1.53365	0.626703	0.0168524	0	6.03719	0.814654
comp2272961_c0_seq1_m.74370	1.51974	0.456633	0.0170329	0	6.03719	0.814654
comp2273038_c0_seq3_m.74522	-1.57154	-0.521172	0.01586	0	6.03719	0.814654
comp2273141_c0_seq2_m.74737	-2.3713	-0.590828	0.00396992	0	6.03719	0.814654
comp2273142_c0_seq1_m.74744	1.49219	0.355774	0.0180273	0	6.03719	0.814654
comp2273257_c0_seq9_m.74986	1.55504	0.51764	0.0163111	0	6.03719	0.814654
comp2273599_c0_seq7_m.75677	-2.21441	-0.719444	0.00505263	0	6.03719	0.814654
comp2273647_c0_seq2_m.75785	-1.49469	-0.704118	0.0177566	0	6.03719	0.814654
comp2273778_c1_seq23_m.76059	-1.38862	-0.652474	0.0218919	0	6.03719	0.814654
comp2273845_c0_seq2_m.76206	1.39101	0.471357	0.0216231	0	6.03719	0.814654
comp2273865_c0_seq2_m.76255	1.42857	0.364271	0.0207265	0	6.03719	0.814654
comp2273911_c0_seq8_m.76361	1.53435	0.417445	0.016672	0	6.03719	0.814654
comp2273926_c0_seq5_m.76421	-3.68626	-1.31835	0.000541353	0	6.03719	0.814654
comp2274106_c1_seq2_m.76871	-1.82423	-1.13747	0.00982613	0	6.03719	0.814654
comp2274137_c1_seq25_m.76929	2.11175	0.989274	0.00658365	0	6.03719	0.814654
comp2274295_c0_seq2_m.77311	-2.79972	-1.18707	0.00153383	0	6.03719	0.814654
comp2274541_c0_seq1_m.77862	-1.36653	-0.509823	0.0229765	0	6.03719	0.814654
comp2274806_c0_seq1_m.78376	-2.16838	-0.744681	0.00568421	0	6.03719	0.814654
comp2274819_c0_seq2_m.78403	2.63528	0.662506	0.00234586	0	6.03719	0.814654
comp2274909_c0_seq7_m.78613	-2.49717	-1.79562	0.00306767	0	6.03719	0.814654
comp2274909_c0_seq7_m.78615	-2.58145	-1.79067	0.00261654	0	6.03719	0.814654
comp2275110_c1_seq5_m.79090	2.79042	0.836243	0.00162406	0	6.03719	0.814654
comp2275241_c0_seq5_m.79383	-2.00419	-0.421001	0.00775376	0	6.03719	0.814654
comp2275270_c0_seq2_m.79424	1.42636	0.43171	0.0208167	0	6.03719	0.814654
comp2275391_c0_seq1_m.79711	1.81985	0.552891	0.00991635	0	6.03719	0.814654
comp2275616_c0_seq2_m.80253	-1.37202	-0.614244	0.0226081	0	6.03719	0.814654
comp2275662_c1_seq10_m.80344	-1.72893	-0.513176	0.0120818	0	6.03719	0.814654
comp2275701_c1_seq1_m.80440	-1.67128	-0.540265	0.0134352	0	6.03719	0.814654
comp2275714_c2_seq1_m.80469	1.56356	0.497637	0.0159502	0	6.03719	0.814654
comp2275822_c0_seq10_m.80745	-1.70817	-0.486454	0.0125329	0	6.03719	0.814654
comp2275893_c0_seq1_m.80933	2.31549	0.888851	0.00469173	0	6.03719	0.814654
comp2275905_c0_seq4_m.80965	2.83715	0.863908	0.00144361	0	6.03719	0.814654
comp2275933_c0_seq1_m.81045	-1.35262	-0.527788	0.0236898	0	6.03719	0.814654
comp2276151_c0_seq3_m.81648	-1.36243	-0.377772	0.0230667	0	6.03719	0.814654
comp2276277_c0_seq18_m.81972	1.8703	0.478925	0.00919455	0	6.03719	0.814654
comp2276389_c1_seq15_m.82250	1.71808	0.419964	0.0123524	0	6.03719	0.814654
comp2276440_c0_seq2_m.82383	-1.57644	-0.53616	0.0155019	0	6.03719	0.814654
comp2276523_c0_seq2_m.82609	1.78255	0.40291	0.0109088	0	6.03719	0.814654
comp2276577_c0_seq8_m.92288	-1.6187	-0.741597	0.0147829	0	6.03719	0.814654
comp2276719_c0_seq5_m.83124	1.48535	0.551229	0.018656	0	6.03719	0.814654
comp2276750_c0_seq1_m.83194	2.27549	0.495846	0.00496241	0	6.03719	0.814654
comp2276768_c0_seq2_m.83249	2.46901	0.724699	0.00333835	0	6.03719	0.814654
comp2276804_c0_seq1_m.83376	1.31964	0.521824	0.024766	0	6.03719	0.814654
comp2276805_c0_seq8_m.83380	-2.00807	-0.780197	0.00757331	0	6.03719	0.814654
comp2276871_c0_seq8_m.83582	1.93995	0.506629	0.00829511	0	6.03719	0.814654
comp2276940_c0_seq2_m.83802	-1.34727	-0.546333	0.0238675	0	6.03719	0.814654
comp2277142_c0_seq6_m.84365	-1.54701	-0.634265	0.0164915	0	6.03719	0.814654
comp2277352_c0_seq3_m.84974	-1.31748	-0.433955	0.0249464	0	6.03719	0.814654
comp2277416_c0_seq3_m.85174	-2.32864	-0.659754	0.00442105	0	6.03719	0.814654
comp2277475_c0_seq2_m.85365	-1.44619	-0.399503	0.0199126	0	6.03719	0.814654
comp2277484_c0_seq6_m.85397	1.36214	0.379753	0.023157	0	6.03719	0.814654
comp2277501_c0_seq23_m.85461	-1.8526	-0.446225	0.009375	0	6.03719	0.814654
comp2277680_c0_seq25_m.86056	-1.55612	-0.409093	0.0162209	0	6.03719	0.814654
comp2277729_c0_seq10_m.86207	-2.32098	-0.83147	0.0046015	0	6.03719	0.814654
comp2277869_c0_seq29_m.86707	1.38768	0.335348	0.0219821	0	6.03719	0.814654
comp2277933_c1_seq7_m.86946	-2.8376	-1.02073	0.00135338	0	6.03719	0.814654
comp2277933_c1_seq7_m.86947	-2.53666	-0.700603	0.00288722	0	6.03719	0.814654
comp2277945_c0_seq2_m.86985	-2.46686	-1.33128	0.00342857	0	6.03719	0.814654
comp2277947_c0_seq1_m.86990	2.02428	0.576647	0.00748308	0	6.03719	0.814654
comp2277995_c0_seq1_m.87177	-1.89995	-0.733063	0.00883647	0	6.03719	0.814654
comp2278010_c1_seq9_m.87231	1.48901	0.341616	0.0182077	0	6.03719	0.814654
comp2278012_c0_seq11_m.87235	-1.63079	-0.679416	0.0143346	0	6.03719	0.814654
comp2278054_c0_seq40_m.87392	-1.8071	-0.590416	0.0102773	0	6.03719	0.814654
comp2278306_c0_seq2_m.88465	-1.59889	-0.397425	0.0152312	0	6.03719	0.814654
comp2278376_c0_seq1_m.88768	-1.51609	-0.43318	0.0171231	0	6.03719	0.814654
comp2278405_c0_seq22_m.88893	-2.62028	-0.959837	0.00252632	0	6.03719	0.814654
comp2278454_c0_seq1_m.89160	-1.75744	-0.486393	0.0114502	0	6.03719	0.814654
comp2278480_c0_seq4_m.89330	-1.57583	-0.642092	0.0155921	0	6.03719	0.814654
comp2278480_c1_seq1_m.89333	-1.46324	-0.613546	0.0193741	0	6.03719	0.814654
comp2278509_c0_seq8_m.89637	-1.79243	-0.636534	0.0106382	0	6.03719	0.814654
comp2278536_c1_seq38_m.89884	-2.13898	-0.781945	0.00604229	0	6.03719	0.814654
comp2278554_c0_seq4_m.90013	-1.37102	-0.304349	0.0227885	0	6.03719	0.814654
comp2278587_c0_seq14_m.90327	-2.55523	-0.63455	0.00270677	0	6.03719	0.814654
comp2278605_c1_seq8_m.90480	-1.70236	-0.680054	0.0126231	0	6.03719	0.814654
comp2279213_c0_seq1_m.91075	1.90982	0.493517	0.00874624	0	6.03719	0.814654
comp2279340_c0_seq1_m.91103	-1.5952	-0.893033	0.0153214	0	6.03719	0.814654
comp2279445_c0_seq1_m.91120	-1.69932	-0.522963	0.0128938	0	6.03719	0.814654
gene17_m.92593	5.26542	1.41873	0.000180451	0	6.03719	0.814654
gi_613484551	-1.4935	-0.673138	0.017937	0	6.03719	0.814654
isotig10568_m.92324	-1.92095	-0.635496	0.00847556	0	6.03719	0.814654
gnl_Pdu_trscr_assembly_1_11607_m.26425	-1.42304	-0.383779	0.020907	0	6.03719	0.814654
gnl_Pdu_trscr_assembly_1_12794_m.61443	-2.12289	-0.877169	0.0064032	0	6.03719	0.814654
gnl_Pdu_trscr_assembly_1_14069_m.67140	1.72477	0.454242	0.012172	0	6.03719	0.814654
gnl_Pdu_trscr_assembly_1_15590_m.29311	-2.77854	-1.80944	0.00171429	0	6.03719	0.814654
gnl_Pdu_trscr_assembly_1_16296_m.13041	1.53489	0.362037	0.0165818	0	6.03719	0.814654
gnl_Pdu_trscr_assembly_1_1986_m.5698	1.30962	0.292423	0.0250367	0	6.03719	0.814654
gnl_Pdu_trscr_assembly_1_200732_m.91055	2.09669	0.718238	0.0067641	0	6.03719	0.814654
gnl_Pdu_trscr_assembly_1_200732_m.91056	1.76972	0.737753	0.0111795	0	6.03719	0.814654
gnl_Pdu_trscr_assembly_1_2589_m.58494	1.33429	0.341971	0.0243148	0	6.03719	0.814654
gnl_Pdu_trscr_assembly_1_2615_m.68529	1.55922	0.369538	0.0160404	0	6.03719	0.814654
gnl_Pdu_trscr_assembly_1_326_m.78835	-1.46072	-0.397191	0.0194643	0	6.03719	0.814654
gnl_Pdu_trscr_assembly_1_5530_m.58454	-1.73644	-0.501612	0.0118111	0	6.03719	0.814654
gnl_Pdu_trscr_assembly_1_7327_m.81715	2.08108	0.529324	0.00712218	0	6.03719	0.814654
gnl_Pdu_trscr_assembly_1_91632_m.21453	2.66012	0.653015	0.00207519	0	6.03719	0.814654
gnl_Pdu_trscr_assembly_1_9334_m.28552	-1.67061	-0.57106	0.0135254	0	6.03719	0.814654
gnl_Pdu_trscr_assembly_1_998_m.15062	2.3514	0.577462	0.00415038	0	6.03719	0.814654
comp2278589_c0_seq3_m.90346	-1.23417	-0.277013	0.0286353	0.00369004	6.03719	0.814654
comp2269915_c0_seq3_m.68230	-1.24945	-0.312105	0.0279915	0.0037037	6.03719	0.814654
comp2258609_c0_seq1_m.49647	-1.24969	-0.291575	0.0279013	0.00371747	6.03719	0.814654
comp1196959_c0_seq2_m.1014	-1.25064	-0.372811	0.0278111	0.00373134	6.03719	0.814654
comp2275542_c0_seq9_m.80087	-1.25955	-0.326537	0.0276353	0.00374532	6.03719	0.814654
comp2257633_c0_seq1_m.48279	1.26042	0.344721	0.0275451	0.0037594	6.03719	0.814654
comp2269793_c0_seq1_m.68039	-1.26462	-0.317996	0.0274549	0.00377358	6.03719	0.814654
comp2277815_c1_seq2_m.86535	1.26857	0.632895	0.0273647	0.00378788	6.03719	0.814654
comp2141229_c0_seq1_m.7283	1.27255	0.346608	0.0272744	0.00380228	6.03719	0.814654
comp2261334_c1_seq1_m.54085	-1.2736	-0.388364	0.0270959	0.00381679	6.03719	0.814654
comp1198575_c0_seq1_m.1066	1.27432	0.341865	0.0270056	0.00383142	6.03719	0.814654
comp2269230_c0_seq2_m.67055	-1.27528	-0.314596	0.0269154	0.00384615	6.03719	0.814654
comp2278470_c0_seq2_m.89275	-1.276	-0.684218	0.0268252	0.003861	6.03719	0.814654
comp2237468_c0_seq1_m.27022	1.27619	0.340128	0.026735	0.00387597	6.03719	0.814654
comp2139115_c0_seq1_m.6894	-1.28627	-0.584466	0.0266447	0.00389105	6.03719	0.814654
comp2271649_c0_seq1_m.71599	-1.28985	-0.373048	0.0264671	0.00390625	6.03719	0.814654
comp2276461_c0_seq7_m.82444	-1.29061	-0.387599	0.0263769	0.00392157	6.03719	0.814654
comp2275974_c0_seq18_m.81146	-1.29413	-0.702277	0.0262867	0.00393701	6.03719	0.814654
comp2280536_c0_seq1_m.91231	1.29451	0.492329	0.026109	0.00395257	6.03719	0.814654
comp2272491_c1_seq4_m.73302	1.3048	0.281952	0.0256682	0.00396825	6.03719	0.814654
comp2268906_c0_seq4_m.66401	-1.30564	-0.395823	0.025578	0.00398406	6.03719	0.814654
comp2206512_c0_seq1_m.14012	1.3057	0.369257	0.0254878	0.004	6.03719	0.814654
gnl_Pdu_trscr_assembly_1_14638_m.60097	1.30756	0.331613	0.0253976	0.00401606	6.03719	0.814654
comp2247098_c0_seq1_m.35275	-1.3076	-0.673207	0.0253073	0.00403226	6.03719	0.814654
comp2274912_c0_seq4_m.78634	-1.22148	-0.325861	0.0293496	0.00729927	6.03719	0.814654
comp2273765_c1_seq6_m.76032	-1.22245	-0.590057	0.0292594	0.00732601	6.03719	0.814654
comp2277740_c0_seq2_m.86258	1.22397	0.383601	0.0290808	0.00735294	6.03719	0.814654
comp2236992_c0_seq1_m.26663	1.17023	0.250715	0.0321325	0.010274	6.03719	0.814654
comp2279773_c0_seq1_m.91181	1.17198	0.286924	0.0320423	0.0103093	6.03719	0.814654
comp2278378_c0_seq4_m.88778	-1.17458	-0.527048	0.0319521	0.0103448	6.03719	0.814654
comp2278077_c0_seq3_m.87468	1.17549	0.424761	0.0318618	0.0103806	6.03719	0.814654
comp2276160_c0_seq4_m.81678	1.17865	0.386195	0.0317716	0.0104167	6.03719	0.814654
comp2269110_c0_seq3_m.66810	1.1847	0.314699	0.0316814	0.010453	6.03719	0.814654
comp2244716_c0_seq1_m.32883	-1.18885	-0.31839	0.0313289	0.0104895	6.03719	0.814654
comp2274259_c0_seq1_m.77220	-1.19138	-0.316215	0.0311494	0.0105263	6.03719	0.814654
comp2274888_c0_seq2_m.78557	-1.19656	-0.551733	0.0310592	0.0105634	6.03719	0.814654
comp2143334_c0_seq2_m.7649	-1.19926	-0.338351	0.0308806	0.0106007	6.03719	0.814654
comp2276528_c1_seq4_m.82615	-1.20169	-0.792231	0.0307904	0.0106383	6.03719	0.814654
comp1970723_c0_seq1_m.3752	1.2033	0.35827	0.0307002	0.0106762	6.03719	0.814654
comp2271257_c1_seq1_m.70699	-1.20732	-0.599727	0.0305216	0.0107143	6.03719	0.814654
comp2275495_c0_seq1_m.79975	1.20917	0.35558	0.0302547	0.0107527	6.03719	0.814654
comp2278308_c1_seq12_m.88483	-1.21001	-0.315871	0.0301645	0.0107914	6.03719	0.814654
comp2276741_c0_seq2_m.83166	1.21081	0.330695	0.0300742	0.0108303	6.03719	0.814654
comp2264838_c0_seq3_m.59436	1.21381	0.44865	0.0298083	0.0108696	6.03719	0.814654
comp2274413_c0_seq1_m.77564	-1.21439	-0.52981	0.0296297	0.0109091	6.03719	0.814654
comp2274693_c0_seq1_m.78142	-1.04455	-0.268875	0.0420244	0.0110803	6.03719	0.814654
comp2278534_c0_seq1_m.89879	-1.04579	-0.25717	0.0419342	0.0111111	6.03719	0.814654
comp2276783_c0_seq3_m.92635	-1.04699	-0.331596	0.041844	0.0111421	6.03719	0.814654
comp2270119_c0_seq15_m.68605	-1.04712	-0.278706	0.0416664	0.0111732	6.03719	0.814654
comp2278276_c0_seq16_m.88350	-1.04836	-0.283153	0.0414887	0.0112045	6.03719	0.814654
comp2279536_c0_seq1_m.91140	1.05044	0.330812	0.0413102	0.011236	6.03719	0.814654
comp2277479_c0_seq1_m.85385	-1.05232	-0.249064	0.0412199	0.0112676	6.03719	0.814654
comp2276936_c0_seq3_m.83786	1.0538	0.417849	0.0411297	0.0112994	6.03719	0.814654
comp2224448_c0_seq1_m.19874	1.05753	0.307404	0.0407632	0.0113314	6.03719	0.814654
comp2266503_c0_seq6_m.62129	-1.05907	-0.277364	0.0403703	0.0113636	6.03719	0.814654
gnl_Pdu_trscr_assembly_1_1986_m.5697	-1.05936	-0.28033	0.0402801	0.011396	6.03719	0.814654
comp2274537_c0_seq28_m.77857	-1.06169	-0.280138	0.0401898	0.0114286	6.03719	0.814654
comp2187328_c0_seq1_m.10936	-1.06216	-0.266812	0.0400996	0.0114613	6.03719	0.814654
comp2197446_c0_seq1_m.12404	-1.06248	-0.253645	0.0400094	0.0114943	6.03719	0.814654
comp2278062_c0_seq4_m.87412	1.06428	0.285936	0.0399192	0.0115274	6.03719	0.814654
comp2265923_c0_seq1_m.61202	-1.06507	-0.417095	0.0398289	0.0115607	6.03719	0.814654
comp2273900_c0_seq1_m.76336	1.06885	0.311623	0.0396513	0.0115942	6.03719	0.814654
comp2273501_c0_seq2_m.75506	1.06931	0.275579	0.0394727	0.0116279	6.03719	0.814654
comp2277311_c0_seq3_m.84858	-1.06965	-0.527765	0.0393825	0.0116618	6.03719	0.814654
comp2273028_c0_seq3_m.74502	-1.07159	-0.396587	0.0392923	0.0116959	6.03719	0.814654
gnl_Pdu_trscr_assembly_1_1514_m.69841	-1.07266	-0.435148	0.0390179	0.0117302	6.03719	0.814654
gnl_Pdu_trscr_assembly_1_16681_m.81096	-1.07346	-0.376777	0.0388393	0.0117647	6.03719	0.814654
comp2259918_c0_seq1_m.51762	1.07395	0.284079	0.0387491	0.0117994	6.03719	0.814654
comp2277374_c0_seq2_m.85051	-1.07449	-0.323392	0.0386588	0.0118343	6.03719	0.814654
comp2247229_c0_seq1_m.35389	1.07561	0.271796	0.0385686	0.0118694	6.03719	0.814654
comp2270905_c1_seq5_m.70069	1.07748	0.545326	0.0383806	0.0119048	6.03719	0.814654
comp2268473_c1_seq1_m.65668	1.07877	0.366627	0.0382049	0.0119403	6.03719	0.814654
comp2279235_c0_seq1_m.91078	1.07911	0.311563	0.0381147	0.011976	6.03719	0.814654
comp2273595_c0_seq1_m.75667	-1.08031	-0.301123	0.0379361	0.012012	6.03719	0.814654
comp2254346_c0_seq1_m.43876	-1.08204	-0.623038	0.0378459	0.0120482	6.03719	0.814654
comp2275698_c0_seq5_m.80432	-1.08983	-0.27059	0.0374887	0.0120846	6.03719	0.814654
comp2266931_c0_seq5_m.62893	-1.09072	-0.556482	0.0373985	0.0121212	6.03719	0.814654
comp2263909_c0_seq2_m.58087	-1.09493	-0.279724	0.0373083	0.0121581	6.03719	0.814654
comp2264743_c0_seq3_m.59295	-1.09614	-0.243027	0.037218	0.0121951	6.03719	0.814654
comp2277816_c0_seq2_m.86536	-1.09791	-0.289092	0.037031	0.0122324	6.03719	0.814654
comp2200530_c0_seq1_m.13009	1.09791	0.377127	0.0369408	0.0122699	6.03719	0.814654
comp2253149_c0_seq1_m.42245	1.10006	0.264818	0.0367434	0.0123077	6.03719	0.814654
comp2268942_c0_seq5_m.66483	-1.10324	-0.483871	0.0363722	0.0123457	6.03719	0.814654
comp2266233_c0_seq1_m.61658	-1.10798	-0.356227	0.036282	0.0123839	6.03719	0.814654
comp2277132_c1_seq1_m.84335	1.10963	0.277319	0.0361062	0.0124224	6.03719	0.814654
comp2274700_c0_seq3_m.78156	1.11024	0.272584	0.0359276	0.0124611	6.03719	0.814654
comp2271753_c0_seq2_m.71801	-1.11231	-0.445156	0.03575	0.0125	6.03719	0.814654
comp2277337_c0_seq4_m.84929	1.12023	0.261645	0.0355742	0.0125392	6.03719	0.814654
comp2277951_c0_seq2_m.87004	-1.12123	-0.454789	0.035484	0.0125786	6.03719	0.814654
comp2277289_c0_seq1_m.84785	1.12262	0.32745	0.0352961	0.0126183	6.03719	0.814654
comp2259963_c0_seq1_m.51818	-1.1244	-0.294671	0.0352058	0.0126582	6.03719	0.814654
gnl_Pdu_trscr_assembly_1_1644_m.62862	-1.12598	-0.284724	0.0351156	0.0126984	6.03719	0.814654
comp2273385_c0_seq1_m.75218	-1.12616	-0.263913	0.034938	0.0127389	6.03719	0.814654
comp2272118_c0_seq11_m.72524	-1.1272	-0.428818	0.0348477	0.0127796	6.03719	0.814654
comp2272724_c0_seq1_m.73818	-1.13049	-0.285954	0.0346701	0.0128205	6.03719	0.814654
comp2276491_c0_seq8_m.82522	1.13159	0.294044	0.0344915	0.0128617	6.03719	0.814654
comp2267169_c0_seq1_m.63315	1.13204	0.346781	0.0344013	0.0129032	6.03719	0.814654
comp2278630_c0_seq8_m.90809	-1.13264	-0.259007	0.0343111	0.012945	6.03719	0.814654
comp2269231_c0_seq2_m.67056	1.13486	0.38005	0.0340404	0.012987	6.03719	0.814654
comp2280694_c0_seq1_m.91236	1.13912	0.322078	0.0338618	0.0130293	6.03719	0.814654
gnl_Pdu_trscr_assembly_1_3867_m.65412	-1.14324	-1.00351	0.0337716	0.0130719	6.03719	0.814654
comp2270228_c0_seq1_m.68797	-1.14342	-0.381223	0.0336814	0.0131148	6.03719	0.814654
comp2262317_c0_seq2_m.55577	1.14553	0.291417	0.0335028	0.0131579	6.03719	0.814654
comp2276634_c1_seq3_m.82935	1.1461	0.336749	0.0334126	0.0132013	6.03719	0.814654
comp2261183_c0_seq1_m.53867	-1.14891	-0.356301	0.0333224	0.013245	6.03719	0.814654
comp2268443_c0_seq2_m.65634	-1.15456	-0.271634	0.0332321	0.013289	6.03719	0.814654
comp2272876_c0_seq2_m.74167	1.15733	0.506311	0.0331419	0.0133333	6.03719	0.814654
comp2274961_c0_seq5_m.78739	1.15739	0.383118	0.0329445	0.0133779	6.03719	0.814654
comp1977957_c0_seq1_m.3878	-1.16026	-0.364014	0.032766	0.0134228	6.03719	0.814654
comp2271419_c1_seq1_m.71009	-1.16276	-0.237309	0.0326758	0.013468	6.03719	0.814654
comp2275312_c0_seq8_m.79518	-1.16316	-0.367142	0.0325855	0.0135135	6.03719	0.814654
comp2271244_c0_seq1_m.70676	-1.16462	-0.356086	0.0324953	0.0135593	6.03719	0.814654
comp2254668_c0_seq2_m.44236	1.03047	0.327598	0.0438477	0.013587	6.03719	0.814654
comp2268336_c0_seq2_m.65472	1.168	0.30279	0.0324051	0.0136054	6.03719	0.814654
comp2264855_c0_seq1_m.59451	1.03379	0.299755	0.043407	0.013624	6.03719	0.814654
comp2226333_c0_seq1_m.20670	1.16968	0.271816	0.0323148	0.0136519	6.03719	0.814654
comp2261047_c0_seq1_m.53653	-1.03389	-0.369042	0.0433167	0.0136612	6.03719	0.814654
comp2263115_c0_seq2_m.56831	-1.03697	-0.338155	0.0430338	0.0136986	6.03719	0.814654
comp2267558_c0_seq1_m.64038	-1.03931	-0.25309	0.0426767	0.0137363	6.03719	0.814654
comp2277088_c0_seq32_m.84183	-1.0413	-0.249265	0.042407	0.0137741	6.03719	0.814654
comp2271594_c0_seq8_m.71451	1.04198	0.348288	0.0422199	0.0138122	6.03719	0.814654
comp2263508_c0_seq1_m.57408	-1.02622	-0.333192	0.0444164	0.0162162	6.03719	0.814654
comp1234630_c0_seq1_m.1254	1.02909	0.287163	0.0440432	0.0162602	6.03719	0.814654
comp2228430_c0_seq1_m.21640	-0.997241	-0.276871	0.0481513	0.0181347	6.03719	0.814654
comp2277977_c1_seq3_m.87126	-0.997821	-0.278272	0.0480611	0.0181818	6.03719	0.814654
comp2257693_c0_seq3_m.48359	0.999331	0.213612	0.0477068	0.0182292	6.03719	0.814654
comp2277083_c0_seq3_m.84173	-1.00026	-0.33049	0.0476165	0.0182768	6.03719	0.814654
comp2263661_c0_seq1_m.57595	-1.0018	-0.22359	0.0474389	0.0183246	6.03719	0.814654
comp2272435_c0_seq2_m.73201	-1.00517	-0.355563	0.0471635	0.0183727	6.03719	0.814654
gnl_Pdu_trscr_assembly_1_6063_m.1752	1.00558	0.282999	0.0469859	0.0184211	6.03719	0.814654
comp2242407_c0_seq1_m.30845	-1.00761	-0.373983	0.0467152	0.0184697	6.03719	0.814654
comp2277203_c0_seq4_m.84565	1.01048	0.280945	0.0463524	0.0185185	6.03719	0.814654
comp2277282_c0_seq11_m.84762	1.01528	0.305325	0.0459803	0.0185676	6.03719	0.814654
comp2267968_c0_seq2_m.64758	-1.01574	-0.339185	0.04589	0.018617	6.03719	0.814654
comp2276272_c0_seq2_m.81963	-1.01616	-0.334031	0.0457124	0.0186667	6.03719	0.814654
comp2271637_c0_seq1_m.71562	-1.01694	-0.321435	0.0454427	0.0187166	6.03719	0.814654
comp2262740_c0_seq13_m.56232	-1.02084	-0.263672	0.0452603	0.0187668	6.03719	0.814654
comp2265464_c0_seq1_m.60472	1.02249	0.305966	0.0450808	0.0188172	6.03719	0.814654
comp2270774_c0_seq1_m.69818	1.02368	0.21359	0.0446992	0.0188679	6.03719	0.814654
comp2260649_c0_seq2_m.52797	-0.973099	-0.25116	0.0515188	0.0221675	6.03719	0.814654
comp2250201_c0_seq1_m.38525	-0.975206	-0.243743	0.0513412	0.0222222	6.03719	0.814654
gnl_Pdu_trscr_assembly_1_11633_m.54013	0.975761	0.267702	0.0511617	0.0222772	6.03719	0.814654
comp2269345_c0_seq1_m.67253	-0.977513	-0.282575	0.0508957	0.0223325	6.03719	0.814654
comp2132126_c0_seq4_m.6558	-0.97833	-0.343482	0.0508055	0.0223881	6.03719	0.814654
comp2270372_c0_seq1_m.69078	0.979212	0.232162	0.0507152	0.0224439	6.03719	0.814654
comp2246502_c0_seq1_m.34680	0.980379	0.281434	0.0504427	0.0225	6.03719	0.814654
comp2272920_c0_seq1_m.74280	-0.980528	-0.290904	0.0503524	0.0225564	6.03719	0.814654
comp2277176_c0_seq2_m.84466	-0.98171	-0.331679	0.0501748	0.0226131	6.03719	0.814654
comp2273813_c0_seq2_m.76128	-0.98388	-0.272507	0.0497321	0.02267	6.03719	0.814654
comp2277005_c0_seq3_m.83943	0.984586	0.349993	0.0495367	0.0227273	6.03719	0.814654
comp2259211_c0_seq1_m.50658	0.98473	0.232921	0.0494464	0.0227848	6.03719	0.814654
comp2275759_c0_seq17_m.80560	0.985525	0.2268	0.0492641	0.0228426	6.03719	0.814654
comp2271755_c0_seq2_m.71808	0.986426	0.30009	0.0490818	0.0229008	6.03719	0.814654
comp2250533_c0_seq1_m.39039	-0.987999	-0.232796	0.0489915	0.0229592	6.03719	0.814654
comp2260519_c0_seq10_m.52611	0.988674	0.275044	0.0489013	0.0230179	6.03719	0.814654
comp2226643_c0_seq1_m.20830	0.993293	0.257824	0.0488111	0.0230769	6.03719	0.814654
comp2274301_c0_seq6_m.77327	-0.994119	-0.300608	0.0487209	0.0231362	6.03719	0.814654
comp2274783_c0_seq9_m.78326	-0.994303	-0.335779	0.0486306	0.0231959	6.03719	0.814654
comp2277114_c1_seq1_m.84278	-0.995253	-0.402698	0.0484352	0.0232558	6.03719	0.814654
comp2275167_c0_seq1_m.79227	-0.969123	-0.237754	0.0521635	0.0245098	6.03719	0.814654
comp2273466_c0_seq2_m.75427	0.970082	0.24023	0.0518872	0.02457	6.03719	0.814654
comp2271307_c0_seq1_m.70799	0.930546	0.287193	0.05636	0.0258824	6.03719	0.814654
comp2261121_c0_seq1_m.53764	0.937522	0.255743	0.0559972	0.0259434	6.03719	0.814654
comp2276498_c2_seq1_m.82546	-0.93926	-0.359652	0.0558148	0.0260047	6.03719	0.814654
comp2258619_c0_seq2_m.49656	0.942629	0.282754	0.0552321	0.0260664	6.03719	0.814654
comp2271906_c0_seq1_m.72107	-0.942737	-0.318225	0.0551419	0.0261283	6.03719	0.814654
comp2280591_c0_seq1_m.91233	0.945163	0.246387	0.0550517	0.0261905	6.03719	0.814654
comp2270650_c0_seq1_m.69588	0.945181	0.303186	0.0549615	0.026253	6.03719	0.814654
comp1194362_c0_seq2_m.804	0.94686	0.221463	0.0546936	0.0263158	6.03719	0.814654
comp2279748_c0_seq1_m.91174	0.948201	0.280576	0.0546034	0.0263789	6.03719	0.814654
comp2241992_c0_seq1_m.30524	0.951832	0.248386	0.0541579	0.0264423	6.03719	0.814654
comp2234809_c0_seq1_m.25266	0.951937	0.272058	0.0540677	0.026506	6.03719	0.814654
comp2243632_c0_seq1_m.31907	0.952906	0.289326	0.0539774	0.02657	6.03719	0.814654
comp2245960_c0_seq1_m.34133	-0.954369	-0.246907	0.053625	0.0266344	6.03719	0.814654
comp2277759_c0_seq3_m.86312	-0.955848	-0.230375	0.0534427	0.026699	6.03719	0.814654
comp2277163_c0_seq1_m.84431	0.95778	0.227512	0.0532556	0.026764	6.03719	0.814654
comp2269374_c0_seq3_m.67298	-0.960014	-0.248867	0.0529906	0.0268293	6.03719	0.814654
comp2254376_c0_seq1_m.43911	-0.960701	-0.330145	0.0529004	0.0268949	6.03719	0.814654
comp2277815_c0_seq5_m.86532	0.92789	0.532354	0.0573224	0.028169	6.03719	0.814654
comp2267172_c0_seq1_m.63318	-0.919	-0.242424	0.0584239	0.0301624	6.03719	0.814654
comp2277351_c1_seq2_m.84968	-0.921179	-0.231934	0.0582444	0.0302326	6.03719	0.814654
comp2278268_c0_seq9_m.88316	-0.923054	-0.229872	0.0581541	0.030303	6.03719	0.814654
comp2248226_c3_seq1_m.36365	0.92321	0.262633	0.0580639	0.0303738	6.03719	0.814654
comp2265029_c1_seq4_m.59734	0.925488	0.265772	0.0578863	0.030445	6.03719	0.814654
comp2276648_c1_seq1_m.82962	-0.900923	-0.225524	0.0607876	0.0343249	6.03719	0.814654
comp2262362_c0_seq1_m.55645	0.901344	0.269258	0.0606974	0.0344037	6.03719	0.814654
comp2138816_c0_seq1_m.6842	-0.902457	-0.310732	0.0606071	0.0344828	6.03719	0.814654
comp2274446_c0_seq19_m.77642	-0.910769	-0.249426	0.0596165	0.0345622	6.03719	0.814654
comp2268964_c0_seq1_m.66515	-0.911794	-0.286044	0.0594389	0.034642	6.03719	0.814654
comp2275769_c0_seq3_m.80583	-0.91249	-0.224526	0.0592566	0.0347222	6.03719	0.814654
comp2276159_c1_seq5_m.81677	-0.898597	-0.305762	0.0611635	0.0363636	6.03719	0.814654
comp2261980_c0_seq3_m.55041	-0.89929	-0.302354	0.0610733	0.0364465	6.03719	0.814654
comp2272371_c0_seq1_m.73054	-0.900178	-0.206304	0.0609831	0.0365297	6.03719	0.814654
comp2275610_c0_seq1_m.80236	-0.890619	-0.247757	0.0627218	0.0406321	6.03719	0.814654
comp2261971_c0_seq1_m.55022	-0.894565	-0.255928	0.0621043	0.040724	6.03719	0.814654
comp2261368_c1_seq1_m.54120	-0.895272	-0.208417	0.0620141	0.0408163	6.03719	0.814654
comp2277956_c0_seq3_m.87021	-0.878484	-0.253777	0.0654671	0.0416667	6.03719	0.814654
comp2254418_c0_seq1_m.43945	0.88027	0.20811	0.065031	0.0417582	6.03719	0.814654
comp2271113_c0_seq5_m.70438	-0.882628	-0.295729	0.0644746	0.0418502	6.03719	0.814654
comp2277388_c0_seq8_m.85093	-0.883163	-0.240877	0.0643844	0.0419426	6.03719	0.814654
comp2261428_c0_seq1_m.54200	-0.88595	-0.229616	0.064031	0.0420354	6.03719	0.814654
comp2273356_c0_seq1_m.75157	-0.88598	-0.212658	0.0639408	0.0421286	6.03719	0.814654
comp2273204_c0_seq26_m.74869	-0.886168	-0.22439	0.0638506	0.0422222	6.03719	0.814654
comp2278238_c1_seq2_m.88191	0.886186	0.282171	0.0637603	0.0423163	6.03719	0.814654
comp2250470_c0_seq1_m.38949	0.888227	0.229084	0.063563	0.0424107	6.03719	0.814654
comp2265370_c0_seq1_m.60276	0.88825	0.19616	0.0634727	0.0425056	6.03719	0.814654
comp2265735_c0_seq4_m.60895	-0.888844	-0.193152	0.0633825	0.0426009	6.03719	0.814654
comp2260997_c1_seq7_m.53574	0.889298	0.276864	0.0631852	0.0426966	6.03719	0.814654
comp2278076_c0_seq2_m.87463	-0.889818	-0.293323	0.0630949	0.0427928	6.03719	0.814654
comp2278161_c0_seq3_m.87805	-0.874203	-0.217698	0.0668355	0.0433839	6.03719	0.814654
comp2247176_c0_seq3_m.35337	0.874446	0.641978	0.0666579	0.0434783	6.03719	0.814654
comp2258437_c0_seq2_m.49437	-0.875076	-0.280973	0.0665677	0.043573	6.03719	0.814654
comp2272519_c1_seq3_m.73361	-0.875537	-0.265528	0.0662951	0.0436681	6.03719	0.814654
comp2257282_c0_seq1_m.47769	0.87739	0.237621	0.0657481	0.0437637	6.03719	0.814654
comp2268857_c0_seq2_m.66328	-0.862622	-0.245994	0.0691438	0.0450644	6.03719	0.814654
comp2270085_c0_seq9_m.68531	-0.865406	-0.262489	0.0686927	0.0451613	6.03719	0.814654
comp2271636_c1_seq22_m.71557	0.867729	0.236405	0.0683383	0.0452586	6.03719	0.814654
comp2269814_c0_seq1_m.68069	-0.86799	-0.208445	0.0682481	0.0453564	6.03719	0.814654
comp2274278_c0_seq6_m.77267	0.871996	0.217798	0.0675226	0.0454545	6.03719	0.814654
comp2274096_c1_seq4_m.76855	-0.853819	-0.179101	0.0712679	0.0467091	6.03719	0.814654
comp2268289_c0_seq5_m.65382	0.854909	0.260076	0.0709887	0.0468085	6.03719	0.814654
comp2275853_c0_seq1_m.80817	-0.856707	-0.20189	0.0708985	0.0469083	6.03719	0.814654
comp2214888_c0_seq1_m.16124	-0.858243	-0.220189	0.0703421	0.0470085	6.03719	0.814654
comp2266801_c0_seq2_m.62707	0.860921	0.212007	0.069797	0.0471092	6.03719	0.814654
comp2269627_c0_seq2_m.67749	-0.846474	-0.311557	0.0730883	0.0485232	6.03719	0.814654
comp1194294_c0_seq1_m.785	0.847342	0.219122	0.0728252	0.0486258	6.03719	0.814654
comp2272641_c0_seq2_m.73619	-0.849107	-0.196584	0.0724624	0.0487288	6.03719	0.814654
comp2279272_c0_seq1_m.91086	-0.841666	-0.208931	0.0740141	0.0503145	6.03719	0.814654
comp2261479_c0_seq1_m.54252	-0.842577	-0.268007	0.0738383	0.0504202	6.03719	0.814654
comp2268417_c0_seq2_m.65592	-0.84492	-0.325411	0.073563	0.0505263	6.03719	0.814654
comp2270952_c0_seq1_m.70164	-0.825733	-0.297482	0.076453	0.0514403	6.03719	0.814654
comp2265255_c2_seq1_m.60100	-0.826591	-0.336681	0.0763628	0.0515464	6.03719	0.814654
comp2272807_c0_seq4_m.74003	-0.829778	-0.202285	0.0759944	0.0516529	6.03719	0.814654
comp2266926_c0_seq2_m.62890	0.831881	0.224274	0.0757274	0.0517598	6.03719	0.814654
comp2140166_c0_seq1_m.7086	0.832745	0.203878	0.0755301	0.0518672	6.03719	0.814654
comp2270385_c0_seq11_m.69105	-0.83317	-0.316683	0.0754398	0.0519751	6.03719	0.814654
comp2265703_c0_seq1_m.60844	0.835008	0.23564	0.0752528	0.0520833	6.03719	0.814654
comp2269201_c0_seq1_m.67004	0.836395	0.239981	0.0749831	0.0521921	6.03719	0.814654
comp2276426_c0_seq2_m.82339	-0.836711	-0.244228	0.0748929	0.0523013	6.03719	0.814654
comp2266755_c0_seq1_m.62616	0.819194	0.339475	0.0782782	0.0528455	6.03719	0.814654
comp2269421_c0_seq7_m.67382	0.819312	0.192208	0.078188	0.0529532	6.03719	0.814654
comp2277134_c1_seq4_m.84342	-0.819478	-0.193293	0.0780977	0.0530612	6.03719	0.814654
comp2270845_c1_seq1_m.69967	-0.820427	-0.225081	0.077656	0.0531697	6.03719	0.814654
comp2249377_c0_seq1_m.37601	-0.822758	-0.284675	0.077297	0.0532787	6.03719	0.814654
comp2263250_c0_seq1_m.57052	0.823114	0.244688	0.0772068	0.0533881	6.03719	0.814654
comp2262185_c0_seq1_m.55318	-0.81816	-0.284185	0.0787491	0.0546559	6.03719	0.814654
comp2276966_c0_seq13_m.83854	-0.818491	-0.189111	0.0786588	0.0547667	6.03719	0.814654
comp2261983_c0_seq1_m.55047	-0.808326	-0.197837	0.0810912	0.0626263	6.03719	0.814654
comp2263347_c0_seq2_m.57195	0.801859	0.21444	0.0820056	0.0641283	6.03719	0.814654
comp2276492_c1_seq1_m.82528	-0.802901	-0.253036	0.0819154	0.064257	6.03719	0.814654
comp2269848_c0_seq4_m.68115	-0.806896	-0.311383	0.0815564	0.0643863	6.03719	0.814654
comp2276295_c0_seq1_m.82012	0.807709	0.161736	0.0813788	0.0645161	6.03719	0.814654
comp2278222_c0_seq3_m.88116	0.800134	0.228293	0.0824643	0.066	6.03719	0.814654
comp2277675_c0_seq81_m.86041	-0.798125	-0.200856	0.0830376	0.0678643	6.03719	0.814654
comp2275068_c1_seq1_m.78996	0.796783	0.21044	0.0837867	0.0697211	6.03719	0.814654
comp2270576_c0_seq1_m.69463	-0.778974	-0.212595	0.0882782	0.0701754	6.03719	0.814654
comp2232641_c0_seq7_m.23875	0.785421	0.24801	0.0867538	0.0703125	6.03719	0.814654
comp2207063_c0_seq1_m.14108	0.787925	0.225841	0.0861062	0.0704501	6.03719	0.814654
gnl_Pdu_trscr_assembly_1_1453_m.85764	-0.789479	-0.200916	0.0857368	0.0705882	6.03719	0.814654
comp2142866_c0_seq1_m.7576	0.791243	0.202218	0.0853534	0.0707269	6.03719	0.814654
comp1953077_c0_seq1_m.3483	0.791757	0.217588	0.0852632	0.0708661	6.03719	0.814654
comp2205419_c0_seq2_m.13843	-0.792617	-0.279411	0.0848938	0.0710059	6.03719	0.814654
comp2268029_c2_seq11_m.64856	0.792837	0.275521	0.0848036	0.0711462	6.03719	0.814654
comp2274031_c0_seq3_m.76707	-0.794341	-0.18393	0.0845376	0.0712871	6.03719	0.814654
comp2275153_c0_seq1_m.79199	-0.794535	-0.168586	0.0844474	0.0714286	6.03719	0.814654
comp2280178_c0_seq1_m.91219	-0.794577	-0.357724	0.0843571	0.0715706	6.03719	0.814654
comp2267732_c0_seq2_m.64331	0.775831	0.222019	0.0902058	0.0717054	6.03719	0.814654
comp2233777_c0_seq1_m.24586	-0.777023	-0.179697	0.0893825	0.0718447	6.03719	0.814654
comp2266714_c1_seq1_m.62532	0.777185	0.254993	0.0892923	0.0719844	6.03719	0.814654
comp2235922_c0_seq1_m.25983	0.772159	0.203538	0.0910348	0.0733591	6.03719	0.814654
comp1953876_c0_seq1_m.3493	-0.773063	-0.208728	0.0908477	0.073501	6.03719	0.814654
comp2268194_c0_seq1_m.65186	0.767225	0.18603	0.0926551	0.0751445	6.03719	0.814654
gnl_Pdu_trscr_assembly_1_1512_m.69248	-0.761836	-0.228931	0.0942434	0.0785441	6.03719	0.814654
comp1199432_c0_seq1_m.1095	0.763118	0.231493	0.0940611	0.0786948	6.03719	0.814654
comp2275523_c0_seq29_m.80039	-0.765964	-0.272324	0.0929558	0.0788462	6.03719	0.814654
comp2211414_c0_seq1_m.14992	-0.754923	-0.234906	0.0959182	0.0819048	6.03719	0.814654
comp2107035_c0_seq2_m.6021	0.757341	0.189557	0.0952754	0.0820611	6.03719	0.814654
comp2258014_c0_seq1_m.48797	-0.757474	-0.358715	0.0951852	0.082218	6.03719	0.814654
comp2269601_c0_seq3_m.67709	-0.748219	-0.196345	0.0977575	0.0849057	6.03719	0.814654
comp2266882_c0_seq1_m.62832	-0.750487	-0.208454	0.0974023	0.0850662	6.03719	0.814654
comp2277332_c0_seq1_m.84919	0.751171	0.155387	0.0970517	0.0852273	6.03719	0.814654
comp2268391_c0_seq1_m.65566	0.751938	0.187469	0.0969615	0.085389	6.03719	0.814654
comp1971911_c0_seq1_m.3786	-0.752535	-0.198665	0.0965799	0.0855513	6.03719	0.814654
comp2208429_c0_seq1_m.14341	0.746568	0.261174	0.0981325	0.086629	6.03719	0.814654
comp2268477_c0_seq2_m.65672	0.743807	0.21788	0.099344	0.0881801	6.03719	0.814654
comp2252746_c0_seq1_m.41651	0.745941	0.196695	0.098328	0.0883459	6.03719	0.814654
comp2277388_c0_seq8_m.85092	-0.738897	-0.211222	0.100894	0.0890538	6.03719	0.814654
comp2268046_c1_seq1_m.64874	0.74108	0.190557	0.100439	0.0892193	6.03719	0.814654
comp2275191_c1_seq2_m.79282	-0.741616	-0.171238	0.100349	0.0893855	6.03719	0.814654
comp2201786_c0_seq1_m.13247	0.741647	0.273584	0.100258	0.0895522	6.03719	0.814654
comp2271916_c0_seq1_m.72122	-0.742145	-0.179993	0.0999831	0.0897196	6.03719	0.814654
comp2253409_c0_seq1_m.42588	-0.742791	-0.204714	0.0997171	0.0898876	6.03719	0.814654
comp2277982_c0_seq2_m.87136	-0.737702	-0.198949	0.101186	0.0907407	6.03719	0.814654
comp2250281_c0_seq1_m.38657	0.731726	0.210974	0.103932	0.093578	6.03719	0.814654
comp2229921_c0_seq1_m.22367	-0.733079	-0.201253	0.103485	0.09375	6.03719	0.814654
comp2273576_c0_seq1_m.75622	-0.73308	-0.189194	0.103303	0.0939227	6.03719	0.814654
comp2274926_c0_seq2_m.78666	-0.733604	-0.204341	0.102891	0.0940959	6.03719	0.814654
comp2272683_c0_seq1_m.73725	-0.734651	-0.161913	0.102616	0.0942699	6.03719	0.814654
comp2260150_c0_seq1_m.52048	-0.730041	-0.184139	0.105315	0.0989011	6.03719	0.814654

## Sheet: PM_NM_Male vs M_NM_Male
	d	logFC	pvalue	FDR	Z	R
comp1194290_c0_seq1_m.781	1.64338	0.861366	0.00486936	0	7.13962	0.84917
comp1197507_c0_seq1_m.1032	1.20691	0.425262	0.0136776	0	7.13962	0.84917
comp1198575_c0_seq1_m.1066	1.20415	0.453048	0.0139464	0	7.13962	0.84917
comp1781461_c0_seq1_m.2253	-1.27585	-0.508379	0.0120639	0	7.13962	0.84917
comp1945561_c0_seq2_m.3380	-1.55613	-0.621814	0.00621992	0	7.13962	0.84917
comp1965369_c0_seq1_contamination_m.3664	1.17696	0.448575	0.0146626	0	7.13962	0.84917
comp2138816_c0_seq1_m.6842	-1.21806	-0.532052	0.0134972	0	7.13962	0.84917
comp2139115_c0_seq1_m.6894	-1.39089	-0.748895	0.00901316	0	7.13962	0.84917
comp2141997_c0_seq1_m.7386	-1.60112	-0.929481	0.00550094	0	7.13962	0.84917
comp2204754_c0_seq1_m.13720	-1.30126	-0.568138	0.0113449	0	7.13962	0.84917
comp2208474_c0_seq1_m.14351	1.74093	0.769919	0.00405733	0	7.13962	0.84917
comp2221095_c0_seq1_m.18558	-1.43409	-0.590877	0.00802444	0	7.13962	0.84917
comp2229729_c0_seq1_m.22264	-1.57213	-0.597535	0.00585902	0	7.13962	0.84917
comp2232290_c0_seq2_m.23637	-2.00371	-1.17039	0.00234586	0	7.13962	0.84917
comp2232805_c0_seq1_m.23974	1.70558	0.641373	0.00450846	0	7.13962	0.84917
comp2233700_c1_seq1_m.24550	-1.35962	-0.78113	0.0100056	0	7.13962	0.84917
comp2234282_c0_seq1_m.24908	1.78731	0.702632	0.00369643	0	7.13962	0.84917
comp2236614_c0_seq1_m.26450	-1.56816	-0.931833	0.0061297	0	7.13962	0.84917
comp2238188_c0_seq1_m.27576	1.50852	0.70387	0.00676128	0	7.13962	0.84917
comp2239022_c0_seq1_m.28102	1.5223	0.760657	0.00658083	0	7.13962	0.84917
comp2239691_c0_seq1_m.28548	-1.97929	-0.894098	0.00252632	0	7.13962	0.84917
comp2242407_c0_seq1_m.30845	-1.75918	-1.0158	0.00387688	0	7.13962	0.84917
comp2242933_c0_seq1_m.31351	4.68095	2.02347	9.02256e-05	0	7.13962	0.84917
comp2243258_c0_seq1_m.31584	-1.89357	-0.804296	0.00324812	0	7.13962	0.84917
comp2245014_c0_seq2_m.33157	1.53765	0.625971	0.00631015	0	7.13962	0.84917
comp2247098_c0_seq1_m.35275	-1.51404	-1.06777	0.00667105	0	7.13962	0.84917
comp2247988_c0_seq1_m.36173	-1.22632	-0.468525	0.0130517	0	7.13962	0.84917
comp2248808_c0_seq2_m.37043	-1.34417	-0.660355	0.0103637	0	7.13962	0.84917
comp2250550_c1_seq1_m.39064	-1.40368	-0.583161	0.00883271	0	7.13962	0.84917
comp2252186_c0_seq3_m.40915	1.17604	0.645582	0.0148412	0	7.13962	0.84917
comp2253516_c0_seq4_m.42708	-1.9654	-1.21583	0.00261654	0	7.13962	0.84917
comp2254167_c0_seq1_m.43587	1.24044	0.494368	0.0129615	0	7.13962	0.84917
comp2254477_c0_seq1_m.44015	1.47952	0.549671	0.00757331	0	7.13962	0.84917
comp2256041_c0_seq1_m.46046	1.48169	0.615083	0.00748308	0	7.13962	0.84917
comp2256095_c0_seq1_m.46136	-1.35403	-0.436515	0.0100959	0	7.13962	0.84917
comp2256220_c0_seq1_m.46316	-1.25955	-0.517165	0.0126006	0	7.13962	0.84917
comp2256252_c0_seq1_m.46348	-1.63569	-1.24251	0.00504981	0	7.13962	0.84917
comp2257070_c0_seq2_m.47512	-1.95128	-1.18231	0.00270677	0	7.13962	0.84917
comp2257070_c0_seq2_m.47513	-1.34173	-0.67509	0.0105414	0	7.13962	0.84917
comp2257395_c0_seq4_m.47951	-2.9007	-1.57297	0.000360902	0	7.13962	0.84917
comp2257674_c0_seq1_m.48339	-1.59084	-0.907197	0.00568139	0	7.13962	0.84917
comp2260797_c0_seq1_m.53088	1.27067	0.433069	0.0123346	0	7.13962	0.84917
comp2261362_c0_seq2_m.54116	-1.57095	-0.571446	0.00594925	0	7.13962	0.84917
comp2261379_c0_seq1_m.54133	-1.18165	-0.653482	0.014485	0	7.13962	0.84917
comp2261395_c0_seq1_m.54150	-1.27766	-0.476309	0.0118863	0	7.13962	0.84917
comp2261399_c0_seq2_m.54155	-2.21236	-1.21905	0.00171429	0	7.13962	0.84917
comp2261623_c0_seq1_m.54431	-2.17539	-0.830888	0.00180451	0	7.13962	0.84917
comp2261876_c0_seq1_m.54865	-1.72189	-0.809229	0.00423778	0	7.13962	0.84917
comp2262137_c0_seq3_m.92268	-2.76932	-1.52346	0.000451128	0	7.13962	0.84917
comp2262137_c0_seq4_m.55246	-2.72133	-1.52673	0.000541353	0	7.13962	0.84917
comp2262281_c0_seq3_m.55504	-1.60128	-0.853439	0.00541071	0	7.13962	0.84917
comp2262360_c0_seq1_m.55644	-1.22578	-0.454891	0.0131419	0	7.13962	0.84917
comp2262465_c0_seq5_m.55795	-2.04687	-1.16893	0.00216541	0	7.13962	0.84917
comp2262731_c0_seq1_m.56213	-1.43037	-0.670193	0.00820207	0	7.13962	0.84917
comp2263291_c0_seq2_m.57114	1.40555	0.597433	0.00865508	0	7.13962	0.84917
comp2263822_c0_seq1_m.57945	1.29926	0.498221	0.0114352	0	7.13962	0.84917
comp2263873_c0_seq9_m.58029	-2.41166	-1.65074	0.00126316	0	7.13962	0.84917
comp2265326_c0_seq3_m.60204	-1.89743	-0.850633	0.00315789	0	7.13962	0.84917
comp2265656_c0_seq3_m.60780	-2.36143	-0.997721	0.00153383	0	7.13962	0.84917
comp2265885_c0_seq3_m.61143	-1.1828	-0.598221	0.0143947	0	7.13962	0.84917
comp2266280_c0_seq1_m.61789	1.716	0.562406	0.00432801	0	7.13962	0.84917
comp2266701_c0_seq3_m.62512	-1.56964	-1.08722	0.00603947	0	7.13962	0.84917
comp2267209_c0_seq1_m.63399	-1.17554	-0.505329	0.0149314	0	7.13962	0.84917
comp2267341_c0_seq1_m.63653	1.2032	0.52092	0.0140367	0	7.13962	0.84917
comp2267571_c0_seq4_m.64058	1.16307	0.409149	0.0156551	0	7.13962	0.84917
comp2268869_c0_seq6_m.66344	-2.54405	-1.59948	0.00081203	0	7.13962	0.84917
comp2268892_c0_seq1_m.66381	-1.47766	-0.643066	0.00775376	0	7.13962	0.84917
comp2268906_c0_seq4_m.66401	-1.34051	-0.471997	0.0106316	0	7.13962	0.84917
comp2268964_c0_seq1_m.66515	-1.506	-0.561171	0.00703195	0	7.13962	0.84917
comp2268978_c0_seq1_m.66540	-1.17264	-0.752464	0.0151118	0	7.13962	0.84917
comp2269060_c0_seq1_m.66718	-1.37305	-0.496899	0.00955451	0	7.13962	0.84917
comp2269060_c1_seq1_m.66719	-1.33066	-0.527889	0.010812	0	7.13962	0.84917
comp2269850_c0_seq1_m.68122	-1.65898	-0.715466	0.00477914	0	7.13962	0.84917
comp2270279_c0_seq7_m.68904	1.25733	0.459786	0.0126908	0	7.13962	0.84917
comp2271225_c0_seq5_m.70641	-1.41101	-0.690438	0.00856485	0	7.13962	0.84917
comp2271257_c1_seq1_m.70699	-1.22559	-0.576239	0.0132321	0	7.13962	0.84917
comp2271381_c1_seq12_m.70942	-1.19803	-0.397361	0.0142143	0	7.13962	0.84917
comp2271526_c0_seq3_m.71285	1.41622	0.588386	0.00838252	0	7.13962	0.84917
comp2271649_c0_seq1_m.71599	-1.29224	-0.505669	0.0117058	0	7.13962	0.84917
comp2271737_c1_seq2_m.71770	1.98249	0.800236	0.00243609	0	7.13962	0.84917
comp2271994_c0_seq2_m.72269	-2.16075	-0.930919	0.00189474	0	7.13962	0.84917
comp2272087_c1_seq4_m.72458	-1.16806	-0.401234	0.0152942	0	7.13962	0.84917
comp2272319_c0_seq24_m.72950	3.22454	1.57826	0.000270677	0	7.13962	0.84917
comp2272437_c1_seq1_m.73204	1.62074	0.944255	0.00532049	0	7.13962	0.84917
comp2272691_c0_seq4_m.73750	-2.1446	-1.28545	0.00198496	0	7.13962	0.84917
comp2272698_c0_seq4_m.73763	2.70625	1.04595	0.000631579	0	7.13962	0.84917
comp2272961_c0_seq1_m.74370	1.5279	0.613061	0.0064906	0	7.13962	0.84917
comp2273038_c0_seq3_m.74522	-1.79843	-0.649537	0.0036062	0	7.13962	0.84917
comp2273141_c0_seq2_m.74737	-1.38237	-0.582437	0.00937406	0	7.13962	0.84917
comp2273599_c0_seq7_m.75677	-1.25036	-0.600908	0.012781	0	7.13962	0.84917
comp2273647_c0_seq2_m.75785	-1.38328	-0.676806	0.00928383	0	7.13962	0.84917
comp2273778_c1_seq23_m.76059	-1.2059	-0.664197	0.0138562	0	7.13962	0.84917
comp2273926_c0_seq5_m.76421	-2.37056	-1.15007	0.00144361	0	7.13962	0.84917
comp2274106_c1_seq2_m.76871	-1.90615	-1.08564	0.00288722	0	7.13962	0.84917
comp2274137_c1_seq25_m.76929	1.63701	0.966663	0.00495959	0	7.13962	0.84917
comp2274295_c0_seq2_m.77311	-2.06889	-1.08236	0.00207519	0	7.13962	0.84917
comp2274541_c0_seq1_m.77862	-1.73338	-0.831844	0.00414756	0	7.13962	0.84917
comp2274783_c0_seq9_m.78326	-1.33916	-0.506413	0.0107218	0	7.13962	0.84917
comp2274806_c0_seq1_m.78376	-1.26425	-0.656903	0.0125103	0	7.13962	0.84917
comp2274909_c0_seq7_m.78613	-2.49838	-1.71605	0.000902256	0	7.13962	0.84917
comp2274909_c0_seq7_m.78615	-2.39899	-1.68397	0.00135338	0	7.13962	0.84917
comp2275110_c1_seq5_m.79090	2.47963	1.00896	0.000992481	0	7.13962	0.84917
comp2275270_c0_seq2_m.79424	1.38969	0.546673	0.00910338	0	7.13962	0.84917
comp2275312_c0_seq8_m.79518	-1.36683	-0.584113	0.00982519	0	7.13962	0.84917
comp2275616_c0_seq2_m.80253	-1.37155	-0.524375	0.00964474	0	7.13962	0.84917
comp2275662_c1_seq10_m.80344	-1.50761	-0.550298	0.0068515	0	7.13962	0.84917
comp2275701_c1_seq1_m.80440	-1.16507	-0.539088	0.0155648	0	7.13962	0.84917
comp2275714_c2_seq1_m.80469	1.47925	0.542785	0.00766353	0	7.13962	0.84917
comp2275822_c0_seq10_m.80745	-1.28065	-0.478814	0.0117961	0	7.13962	0.84917
comp2275893_c0_seq1_m.80933	1.71388	0.861935	0.00441823	0	7.13962	0.84917
comp2275905_c0_seq4_m.80965	1.42611	0.704989	0.00829229	0	7.13962	0.84917
comp2275974_c0_seq18_m.81146	-1.18685	-0.705422	0.0143045	0	7.13962	0.84917
comp2276159_c1_seq5_m.81677	-1.29689	-0.423121	0.0115254	0	7.13962	0.84917
comp2276277_c0_seq18_m.81972	1.8633	0.672586	0.00342575	0	7.13962	0.84917
comp2276491_c0_seq8_m.82522	1.34898	0.459132	0.0101861	0	7.13962	0.84917
comp2276523_c0_seq2_m.82609	1.3747	0.536933	0.00946429	0	7.13962	0.84917
comp2276768_c0_seq2_m.83249	2.02089	0.788209	0.00225564	0	7.13962	0.84917
comp2276805_c0_seq8_m.83380	-1.50739	-0.655656	0.00694173	0	7.13962	0.84917
comp2276871_c0_seq8_m.83582	1.44227	0.51123	0.00793421	0	7.13962	0.84917
comp2277005_c0_seq3_m.83943	1.16642	0.474467	0.0154746	0	7.13962	0.84917
comp2277203_c0_seq4_m.84565	1.36493	0.458262	0.00991541	0	7.13962	0.84917
comp2277282_c0_seq11_m.84762	2.41984	0.953211	0.00117293	0	7.13962	0.84917
comp2277416_c0_seq3_m.85174	-1.80187	-0.679169	0.00351598	0	7.13962	0.84917
comp2277729_c0_seq10_m.86207	-1.32485	-0.685484	0.0109925	0	7.13962	0.84917
comp2277815_c0_seq5_m.86532	1.62553	0.806745	0.00514004	0	7.13962	0.84917
comp2277815_c1_seq2_m.86535	2.31275	0.847187	0.00162406	0	7.13962	0.84917
comp2277869_c0_seq29_m.86707	1.36902	0.4806	0.00973496	0	7.13962	0.84917
comp2277933_c1_seq7_m.86946	-1.74978	-0.93816	0.00396711	0	7.13962	0.84917
comp2277933_c1_seq7_m.86947	-1.38492	-0.577702	0.00919361	0	7.13962	0.84917
comp2277945_c0_seq2_m.86985	-2.68045	-1.7229	0.000721805	0	7.13962	0.84917
comp2277947_c0_seq1_m.86990	1.77429	0.628722	0.00378665	0	7.13962	0.84917
comp2277972_c0_seq17_m.87106	1.27236	0.455493	0.0121541	0	7.13962	0.84917
comp2278012_c0_seq11_m.87235	-1.21643	-0.667623	0.0135874	0	7.13962	0.84917
comp2278054_c0_seq40_m.87392	-1.53276	-0.681448	0.00640038	0	7.13962	0.84917
comp2278062_c0_seq4_m.87412	1.90351	0.65995	0.00306767	0	7.13962	0.84917
comp2278077_c0_seq3_m.87468	1.29453	0.479784	0.0116156	0	7.13962	0.84917
comp2278405_c0_seq22_m.88893	-1.68537	-0.881763	0.00468891	0	7.13962	0.84917
comp2278480_c0_seq4_m.89330	-1.32815	-0.604759	0.0109023	0	7.13962	0.84917
comp2278480_c1_seq1_m.89333	-1.24723	-0.558693	0.0128712	0	7.13962	0.84917
comp2278509_c0_seq8_m.89637	-1.59649	-0.635376	0.00559117	0	7.13962	0.84917
comp2278536_c1_seq38_m.89884	-1.50257	-0.619761	0.00712218	0	7.13962	0.84917
comp2278587_c0_seq14_m.90327	-1.49681	-0.569181	0.00730263	0	7.13962	0.84917
comp2279213_c0_seq1_m.91075	1.16786	0.395092	0.0153844	0	7.13962	0.84917
comp2279340_c0_seq1_m.91103	-1.48735	-0.7434	0.00739286	0	7.13962	0.84917
gene17_m.92593	3.54068	1.59432	0.000180451	0	7.13962	0.84917
gi_613484551	-1.17278	-0.585266	0.0150216	0	7.13962	0.84917
isotig10568_m.92324	-1.90612	-0.989653	0.00297744	0	7.13962	0.84917
gnl_Pdu_trscr_assembly_1_12794_m.61443	-1.62472	-0.904373	0.00523026	0	7.13962	0.84917
gnl_Pdu_trscr_assembly_1_15590_m.29311	-2.46436	-1.66391	0.00108271	0	7.13962	0.84917
gnl_Pdu_trscr_assembly_1_16681_m.81096	-1.40141	-0.468603	0.00892293	0	7.13962	0.84917
gnl_Pdu_trscr_assembly_1_200732_m.91055	1.69362	0.763859	0.00459868	0	7.13962	0.84917
gnl_Pdu_trscr_assembly_1_200732_m.91056	1.49878	0.809392	0.00721241	0	7.13962	0.84917
gnl_Pdu_trscr_assembly_1_3867_m.65412	-1.272	-1.0804	0.0122444	0	7.13962	0.84917
gnl_Pdu_trscr_assembly_1_5530_m.58454	-1.93271	-0.649422	0.00279699	0	7.13962	0.84917
gnl_Pdu_trscr_assembly_1_9334_m.28552	-1.46634	-0.601187	0.00784398	0	7.13962	0.84917
comp2274819_c0_seq2_m.78403	1.06569	0.435058	0.0205517	0.00512821	7.13962	0.84917
comp2274537_c0_seq28_m.77857	1.06791	0.404611	0.0204615	0.00515464	7.13962	0.84917
comp2275241_c0_seq5_m.79383	-1.07041	-0.379605	0.0202735	0.00518135	7.13962	0.84917
comp2252506_c0_seq1_m.41372	-1.0722	-0.376555	0.0201833	0.00520833	7.13962	0.84917
comp2279445_c0_seq1_m.91120	-1.07508	-0.537872	0.020093	0.0052356	7.13962	0.84917
comp2271350_c0_seq18_m.70897	1.07536	0.539299	0.0200028	0.00526316	7.13962	0.84917
comp2264022_c0_seq13_m.58310	-1.07979	-0.35706	0.0197331	0.00529101	7.13962	0.84917
comp2247821_c0_seq5_m.35979	-1.09357	-0.443124	0.0195461	0.00531915	7.13962	0.84917
comp2225664_c0_seq1_m.20382	-1.09431	-0.452644	0.0194558	0.00534759	7.13962	0.84917
comp2269532_c0_seq13_m.67583	-1.09554	-0.444915	0.0192735	0.00537634	7.13962	0.84917
comp2278605_c1_seq8_m.90480	-1.09808	-0.555452	0.0191833	0.00540541	7.13962	0.84917
comp2263394_c0_seq1_m.57263	-1.09852	-0.516532	0.019093	0.00543478	7.13962	0.84917
comp2273865_c0_seq2_m.76255	1.10099	0.474785	0.0189107	0.00546448	7.13962	0.84917
comp2276741_c0_seq2_m.83166	1.1014	0.409712	0.0188205	0.00549451	7.13962	0.84917
comp2266171_c0_seq1_m.61557	1.10307	0.436119	0.0187303	0.00552486	7.13962	0.84917
gnl_Pdu_trscr_assembly_1_14069_m.67140	1.10537	0.415565	0.0185517	0.00555556	7.13962	0.84917
comp2258554_c0_seq1_m.49568	-1.11386	-0.453443	0.0182867	0.00558659	7.13962	0.84917
comp2278378_c0_seq4_m.88778	-1.1139	-0.542067	0.0181964	0.00561798	7.13962	0.84917
comp2272087_c2_seq11_m.72459	-1.11485	-0.445468	0.0181062	0.00564972	7.13962	0.84917
comp1785956_c0_seq1_m.2259	-1.11736	-0.42473	0.018016	0.00568182	7.13962	0.84917
comp2276577_c0_seq8_m.92288	-1.11755	-0.590457	0.0179258	0.00571429	7.13962	0.84917
comp2265897_c0_seq5_m.61166	1.11808	0.433578	0.0178355	0.00574713	7.13962	0.84917
comp2269297_c0_seq2_m.67181	1.12102	0.529869	0.0177453	0.00578035	7.13962	0.84917
comp2276440_c0_seq2_m.82383	-1.12852	-0.461498	0.0175677	0.00581395	7.13962	0.84917
comp2261716_c0_seq2_m.54597	-1.12974	-0.443785	0.0174774	0.00584795	7.13962	0.84917
comp2278422_c0_seq1_m.89011	1.13085	0.380973	0.0173872	0.00588235	7.13962	0.84917
comp2277088_c0_seq32_m.84183	-1.13128	-0.409989	0.017297	0.00591716	7.13962	0.84917
comp2277311_c0_seq3_m.84858	-1.13202	-0.64692	0.0172068	0.00595238	7.13962	0.84917
comp2274413_c0_seq1_m.77564	-1.13252	-0.513593	0.0171165	0.00598802	7.13962	0.84917
comp2275391_c0_seq1_m.79711	1.13303	0.414679	0.0170263	0.0060241	7.13962	0.84917
comp2277995_c0_seq1_m.87177	-1.13346	-0.517372	0.0169361	0.00606061	7.13962	0.84917
comp2267968_c0_seq2_m.64758	-1.13688	-0.522617	0.0168459	0.00609756	7.13962	0.84917
comp2272882_c0_seq14_m.74184	1.13861	0.628763	0.0167556	0.00613497	7.13962	0.84917
comp2276498_c2_seq1_m.82546	-1.14091	-0.489134	0.0164718	0.00617284	7.13962	0.84917
comp2277142_c0_seq6_m.84365	-1.14246	-0.525085	0.0163816	0.00621118	7.13962	0.84917
comp2265589_c0_seq2_m.60673	1.14745	0.388452	0.0162914	0.00625	7.13962	0.84917
comp2276389_c1_seq15_m.82250	1.14944	0.395986	0.0161128	0.00628931	7.13962	0.84917
comp2261971_c0_seq1_m.55022	-1.15008	-0.414725	0.0160226	0.00632911	7.13962	0.84917
comp2224014_c0_seq1_m.19704	1.15808	0.470965	0.0159323	0.00636943	7.13962	0.84917
comp2187328_c0_seq1_m.10936	-1.16186	-0.470407	0.0158421	0.00641026	7.13962	0.84917
comp2276719_c0_seq5_m.83124	1.00919	0.468048	0.0230874	0.00943396	7.13962	0.84917
comp2254346_c0_seq1_m.43876	-1.01156	-0.614926	0.0229972	0.00947867	7.13962	0.84917
comp2270797_c0_seq10_m.69872	-1.0145	-0.368225	0.0228017	0.00952381	7.13962	0.84917
comp2271567_c0_seq1_m.71391	-1.0214	-0.492736	0.0226259	0.00956938	7.13962	0.84917
comp2273257_c0_seq9_m.74986	1.02251	0.566489	0.0225357	0.00961538	7.13962	0.84917
comp2278470_c0_seq2_m.89275	-1.03284	-0.583304	0.0222688	0.00966184	7.13962	0.84917
comp2276804_c0_seq1_m.83376	1.03327	0.426494	0.0221786	0.00970874	7.13962	0.84917
comp2265255_c2_seq1_m.60100	-1.04103	-0.491091	0.0219962	0.0097561	7.13962	0.84917
gnl_Pdu_trscr_assembly_1_3048_m.12984	-1.04297	-0.396776	0.021906	0.00980392	7.13962	0.84917
comp2278161_c0_seq3_m.87805	-1.04532	-0.367026	0.0217284	0.00985222	7.13962	0.84917
comp2274888_c0_seq2_m.78557	-1.05392	-0.542937	0.0216382	0.00990099	7.13962	0.84917
comp2271539_c0_seq2_m.71326	1.05583	0.390019	0.0214605	0.00995025	7.13962	0.84917
comp2266714_c1_seq1_m.62532	1.05659	0.409439	0.0211955	0.01	7.13962	0.84917
comp2272519_c1_seq3_m.73361	-1.05756	-0.385252	0.0211053	0.0100503	7.13962	0.84917
comp2245053_c0_seq1_m.33185	-1.05883	-0.467914	0.021015	0.010101	7.13962	0.84917
comp2274581_c1_seq21_m.92631	-1.06238	-0.340179	0.0209248	0.0101523	7.13962	0.84917
comp2266841_c0_seq1_m.62766	-1.06272	-0.387129	0.0208346	0.0102041	7.13962	0.84917
comp2267169_c0_seq1_m.63315	0.987508	0.437233	0.0241814	0.0137615	7.13962	0.84917
comp2138952_c0_seq1_m.6867	-0.988411	-0.417122	0.0240912	0.0138249	7.13962	0.84917
comp2276750_c0_seq1_m.83194	0.989208	0.355026	0.0239135	0.0138889	7.13962	0.84917
comp2203251_c0_seq1_m.13504	-0.990739	-0.346017	0.0238233	0.0139535	7.13962	0.84917
comp2278010_c1_seq9_m.87231	0.991146	0.360954	0.0237331	0.0140187	7.13962	0.84917
comp2222959_c0_seq1_m.19328	1.0015	0.470618	0.0235461	0.0140845	7.13962	0.84917
gnl_Pdu_trscr_assembly_1_998_m.15062	0.976228	0.350472	0.0248412	0.018018	7.13962	0.84917
comp2263667_c0_seq1_m.57601	0.976264	0.412428	0.0247509	0.0180995	7.13962	0.84917
comp2271319_c0_seq2_m.70822	0.979153	0.389141	0.0246607	0.0181818	7.13962	0.84917
comp2277132_c1_seq1_m.84335	0.985386	0.325756	0.0243769	0.0182648	7.13962	0.84917
comp2277501_c0_seq23_m.85461	-0.922245	-0.372227	0.0284821	0.0205761	7.13962	0.84917
comp2258014_c0_seq1_m.48797	-0.92541	-0.493243	0.0282951	0.0206612	7.13962	0.84917
comp2272495_c0_seq1_m.73308	0.92608	0.342043	0.0282049	0.0207469	7.13962	0.84917
comp2273900_c0_seq1_m.76336	0.929774	0.350899	0.0279352	0.0208333	7.13962	0.84917
comp2254470_c0_seq1_m.44006	-0.930252	-0.313801	0.0275799	0.0209205	7.13962	0.84917
comp2280178_c0_seq1_m.91219	-0.93026	-0.473559	0.0274897	0.0210084	7.13962	0.84917
comp2277951_c0_seq2_m.87004	-0.931666	-0.47368	0.0273073	0.021097	7.13962	0.84917
comp2276528_c1_seq4_m.82615	-0.932158	-0.635204	0.0272171	0.0211864	7.13962	0.84917
comp2277724_c0_seq10_m.86198	-0.940096	-0.377054	0.0267679	0.0212766	7.13962	0.84917
comp2275542_c0_seq9_m.80087	-0.943343	-0.363236	0.0265808	0.0213675	7.13962	0.84917
comp2254641_c1_seq1_m.44200	-0.943587	-0.315127	0.0264906	0.0214592	7.13962	0.84917
comp2258554_c1_seq2_m.49570	-0.947978	-0.461459	0.0263036	0.0215517	7.13962	0.84917
comp2245721_c0_seq1_m.33844	0.949666	0.400502	0.0262133	0.021645	7.13962	0.84917
comp2257585_c0_seq1_m.48216	-0.950731	-0.401833	0.0261231	0.0217391	7.13962	0.84917
comp2271753_c0_seq2_m.71801	-0.952903	-0.465317	0.0260329	0.0218341	7.13962	0.84917
comp1194362_c0_seq2_m.804	0.95811	0.331047	0.0259427	0.0219298	7.13962	0.84917
comp2275933_c0_seq1_m.81045	-0.961635	-0.483496	0.0257632	0.0220264	7.13962	0.84917
comp2254206_c0_seq1_m.43646	0.961822	0.366963	0.0256729	0.0221239	7.13962	0.84917
comp2276634_c1_seq3_m.82935	0.96288	0.374632	0.0255827	0.0222222	7.13962	0.84917
comp2263896_c0_seq3_m.58065	0.972299	0.380142	0.0252152	0.0223214	7.13962	0.84917
comp2278238_c1_seq2_m.88191	0.974317	0.36719	0.0250282	0.0224215	7.13962	0.84917
comp2276426_c0_seq2_m.82339	-0.884113	-0.328628	0.0303186	0.024	7.13962	0.84917
comp2260394_c0_seq1_m.52394	0.900517	0.359976	0.0295714	0.0240964	7.13962	0.84917
comp2276648_c1_seq1_m.82962	-0.905686	-0.312375	0.0293891	0.0241935	7.13962	0.84917
comp2266931_c0_seq5_m.62893	-0.908624	-0.496702	0.0291259	0.0242915	7.13962	0.84917
comp2249227_c0_seq1_m.37479	0.909581	0.325112	0.0290357	0.0243902	7.13962	0.84917
comp2268942_c0_seq5_m.66483	-0.919058	-0.442827	0.02886	0.0244898	7.13962	0.84917
comp2269171_c0_seq3_m.66933	0.920893	0.400254	0.0286776	0.0245902	7.13962	0.84917
comp2277475_c0_seq2_m.85365	-0.876921	-0.322404	0.0309756	0.027668	7.13962	0.84917
comp2269848_c0_seq4_m.68115	-0.876921	-0.382638	0.0308853	0.0277778	7.13962	0.84917
comp2272876_c0_seq2_m.74167	0.877686	0.37526	0.0307951	0.0278884	7.13962	0.84917
comp2263277_c0_seq1_m.57091	-0.83947	-0.278901	0.0339887	0.0298507	7.13962	0.84917
comp2268441_c0_seq1_m.65632	0.842306	0.44821	0.0337932	0.0299625	7.13962	0.84917
comp2263921_c0_seq2_m.58101	-0.84417	-0.400052	0.0336109	0.0300752	7.13962	0.84917
comp2268473_c1_seq1_m.65668	0.849517	0.407148	0.0334333	0.0301887	7.13962	0.84917
gnl_Pdu_trscr_assembly_1_7327_m.81715	0.850136	0.322068	0.0331588	0.030303	7.13962	0.84917
comp1196959_c0_seq2_m.1014	-0.851899	-0.365781	0.0330686	0.0304183	7.13962	0.84917
comp2206512_c0_seq1_m.14012	0.855374	0.322503	0.0327049	0.0305344	7.13962	0.84917
comp2250281_c0_seq1_m.38657	0.860078	0.312357	0.0324286	0.0306513	7.13962	0.84917
comp2248254_c1_seq2_m.36433	0.862167	0.324821	0.0323383	0.0307692	7.13962	0.84917
comp2264743_c0_seq3_m.59295	-0.865969	-0.279166	0.0320686	0.030888	7.13962	0.84917
comp2266503_c0_seq6_m.62129	-0.866052	-0.304227	0.0319784	0.0310078	7.13962	0.84917
comp2261980_c0_seq3_m.55041	-0.867443	-0.38717	0.0318882	0.0311284	7.13962	0.84917
comp2276461_c0_seq7_m.82444	-0.869735	-0.299137	0.0317011	0.03125	7.13962	0.84917
comp2261183_c0_seq1_m.53867	-0.871209	-0.366343	0.0315226	0.0313725	7.13962	0.84917
comp2270228_c0_seq1_m.68797	-0.875554	-0.400099	0.0312481	0.0314961	7.13962	0.84917
gnl_Pdu_trscr_assembly_1_326_m.78835	-0.833741	-0.311387	0.0345338	0.0332103	7.13962	0.84917
comp2232641_c0_seq7_m.23875	0.834064	0.330133	0.0344436	0.0333333	7.13962	0.84917
comp2278454_c0_seq1_m.89160	-0.835717	-0.361215	0.0342566	0.0334572	7.13962	0.84917
comp2277388_c0_seq8_m.85092	-0.79468	-0.346203	0.0381776	0.0348432	7.13962	0.84917
comp2268336_c0_seq2_m.65472	0.798629	0.254987	0.0377105	0.034965	7.13962	0.84917
comp2272254_c0_seq4_m.72822	-0.79869	-0.39748	0.0376203	0.0350877	7.13962	0.84917
comp2275107_c0_seq4_m.79080	-0.800129	-0.267974	0.0374427	0.0352113	7.13962	0.84917
comp2276940_c0_seq2_m.83802	-0.803113	-0.306015	0.037265	0.0353357	7.13962	0.84917
comp2276936_c0_seq3_m.83786	0.803433	0.530312	0.0371748	0.035461	7.13962	0.84917
comp2264838_c0_seq3_m.59436	0.80358	0.322106	0.0370846	0.0355872	7.13962	0.84917
comp2272782_c0_seq2_m.73955	0.804115	0.37281	0.0369944	0.0357143	7.13962	0.84917
comp2273845_c0_seq2_m.76206	0.807075	0.349818	0.0369041	0.0358423	7.13962	0.84917
gnl_Pdu_trscr_assembly_1_2615_m.68529	0.808999	0.296254	0.0367218	0.0359712	7.13962	0.84917
gnl_Pdu_trscr_assembly_1_20144_m.60515	0.809923	0.261912	0.0366316	0.0361011	7.13962	0.84917
comp2262185_c0_seq1_m.55318	-0.810311	-0.366998	0.0365414	0.0362319	7.13962	0.84917
comp2277911_c0_seq5_m.86869	0.813994	0.323385	0.0358797	0.0363636	7.13962	0.84917
comp2268225_c0_seq5_m.65245	-0.823254	-0.355912	0.0352538	0.0364964	7.13962	0.84917
comp2273595_c0_seq1_m.75667	-0.823602	-0.309693	0.0351635	0.03663	7.13962	0.84917
comp2278306_c0_seq2_m.88465	-0.824831	-0.291554	0.0350733	0.0367647	7.13962	0.84917
comp2276973_c0_seq1_m.83872	0.784306	0.268478	0.0389192	0.0378007	7.13962	0.84917
comp2271595_c0_seq2_m.71452	-0.785474	-0.296326	0.0388289	0.037931	7.13962	0.84917
comp2263768_c0_seq2_m.57843	-0.786593	-0.264144	0.0387387	0.0380623	7.13962	0.84917
comp2204672_c0_seq1_m.13711	-0.791735	-0.271782	0.0384511	0.0381944	7.13962	0.84917
comp2261428_c0_seq1_m.54200	-0.772403	-0.252282	0.0403459	0.0442177	7.13962	0.84917
comp2273193_c0_seq1_m.74830	-0.77358	-0.352617	0.0402556	0.0443686	7.13962	0.84917
comp2263115_c0_seq2_m.56831	-0.775964	-0.307683	0.040078	0.0445205	7.13962	0.84917
comp2263909_c0_seq2_m.58087	-0.757057	-0.267478	0.0434727	0.0450161	7.13962	0.84917
comp2246502_c0_seq1_m.34680	0.757582	0.274989	0.0432951	0.0451613	7.13962	0.84917
comp2273813_c0_seq2_m.76128	-0.757978	-0.28552	0.0432049	0.0453074	7.13962	0.84917
comp2277413_c0_seq4_m.85165	-0.759814	-0.294009	0.0428336	0.0454545	7.13962	0.84917
comp2268336_c1_seq1_m.65474	0.761164	0.313213	0.0426551	0.0456026	7.13962	0.84917
comp2265049_c0_seq3_m.59764	-0.762062	-0.336662	0.0425648	0.0457516	7.13962	0.84917
comp2272233_c0_seq1_m.72760	-0.762333	-0.25401	0.0424746	0.0459016	7.13962	0.84917
comp2265923_c0_seq1_m.61202	-0.764985	-0.349517	0.0422951	0.0460526	7.13962	0.84917
comp2269987_c0_seq2_m.68354	-0.765051	-0.31012	0.0422049	0.0462046	7.13962	0.84917
comp2268172_c0_seq1_m.65149	0.767252	0.343166	0.0417368	0.0463576	7.13962	0.84917
gnl_Pdu_trscr_assembly_1_16061_m.43221	-0.768544	-0.274436	0.0414342	0.0465116	7.13962	0.84917
comp2269698_c0_seq1_m.67864	-0.768737	-0.323704	0.0412472	0.0466667	7.13962	0.84917
comp2241424_c0_seq3_m.29932	-0.769893	-0.377786	0.0410592	0.0468227	7.13962	0.84917
comp2276783_c0_seq3_m.92635	-0.77097	-0.292072	0.040969	0.0469799	7.13962	0.84917
comp2259349_c0_seq2_m.50877	-0.771079	-0.318881	0.0408788	0.047138	7.13962	0.84917
comp2269230_c0_seq2_m.67055	-0.771673	-0.283395	0.0407885	0.0472973	7.13962	0.84917
comp2261368_c1_seq1_m.54120	-0.771857	-0.255571	0.0406983	0.0474576	7.13962	0.84917
comp2261047_c0_seq1_m.53653	-0.74975	-0.313111	0.0443111	0.0479233	7.13962	0.84917
comp2277769_c0_seq5_m.86350	0.753038	0.275904	0.0440263	0.0480769	7.13962	0.84917
comp2275508_c1_seq3_m.80009	-0.740665	-0.303953	0.0456165	0.0504732	7.13962	0.84917
comp1977957_c0_seq1_m.3878	-0.741163	-0.311546	0.0454286	0.0506329	7.13962	0.84917
comp2271350_c0_seq18_m.70898	0.741176	0.256558	0.0453383	0.0507937	7.13962	0.84917
gnl_Pdu_trscr_assembly_1_2589_m.58494	0.74424	0.255628	0.0451607	0.0509554	7.13962	0.84917
comp2277388_c0_seq8_m.85093	-0.733474	-0.318916	0.0470103	0.052795	7.13962	0.84917
comp2263661_c0_seq1_m.57595	-0.733849	-0.23601	0.0468233	0.0529595	7.13962	0.84917
comp2277352_c0_seq3_m.84974	-0.736611	-0.295044	0.0462688	0.053125	7.13962	0.84917
comp2278554_c0_seq4_m.90013	-0.737134	-0.277205	0.0461786	0.0532915	7.13962	0.84917
comp2266801_c0_seq2_m.62707	0.739515	0.272362	0.0458994	0.0534591	7.13962	0.84917
comp2270148_c0_seq3_m.68661	0.727293	0.288633	0.0482077	0.0552147	7.13962	0.84917
comp2276272_c0_seq2_m.81963	-0.728842	-0.318055	0.0480254	0.0553846	7.13962	0.84917
comp2270458_c0_seq1_m.69251	-0.732178	-0.257664	0.0474906	0.0555556	7.13962	0.84917
comp1953077_c0_seq1_m.3483	0.732599	0.298377	0.0473026	0.0557276	7.13962	0.84917
comp2245960_c0_seq1_m.34133	-0.717853	-0.323512	0.0496758	0.0570571	7.13962	0.84917
comp1910314_c0_seq1_m.2848	0.721949	0.271629	0.0488543	0.0572289	7.13962	0.84917
comp2277312_c0_seq10_m.84862	0.72542	0.261698	0.0487641	0.0574018	7.13962	0.84917
comp2232909_c0_seq1_m.24034	0.725689	0.37763	0.0486739	0.0575758	7.13962	0.84917
comp2269906_c0_seq2_m.68214	0.726139	0.335088	0.0485836	0.0577508	7.13962	0.84917
comp2271244_c0_seq1_m.70676	-0.726549	-0.281394	0.0484934	0.0579268	7.13962	0.84917
gnl_Pdu_trscr_assembly_1_7274_m.39240	-0.72708	-0.481737	0.0484032	0.058104	7.13962	0.84917
comp2278376_c0_seq1_m.88768	-0.707462	-0.282341	0.0519051	0.0615836	7.13962	0.84917
comp2273765_c1_seq6_m.76032	-0.708448	-0.383438	0.0517265	0.0617647	7.13962	0.84917
comp2280536_c0_seq1_m.91231	0.708909	0.301343	0.0516363	0.0619469	7.13962	0.84917
comp2262339_c0_seq1_m.55609	0.710153	0.313686	0.0512735	0.0621302	7.13962	0.84917
comp2263658_c0_seq3_m.57592	-0.711913	-0.293585	0.0510855	0.0623145	7.13962	0.84917
comp2271636_c1_seq22_m.71557	0.713386	0.278924	0.0508148	0.0625	7.13962	0.84917
comp2236007_c0_seq2_m.26049	0.713961	0.311496	0.0506325	0.0626866	7.13962	0.84917
comp2268115_c0_seq2_m.65034	0.71501	0.272549	0.0504568	0.0628743	7.13962	0.84917
comp2278589_c0_seq3_m.90346	-0.704838	-0.246341	0.0525526	0.0639535	7.13962	0.84917
comp2262843_c0_seq2_m.56395	-0.704981	-0.2381	0.0523769	0.0641399	7.13962	0.84917
gnl_Pdu_trscr_assembly_1_1512_m.69248	-0.705692	-0.317863	0.0522867	0.0643275	7.13962	0.84917
comp2262317_c0_seq2_m.55577	0.69236	0.33472	0.0546739	0.0659026	7.13962	0.84917
comp2265386_c0_seq2_m.60299	0.692801	0.356077	0.0545836	0.066092	7.13962	0.84917
comp2244716_c0_seq1_m.32883	-0.694089	-0.244666	0.0542162	0.0662824	7.13962	0.84917
comp2254456_c0_seq2_m.43993	-0.697803	-0.339163	0.0535714	0.066474	7.13962	0.84917
comp2248226_c3_seq1_m.36365	0.702445	0.240825	0.0530132	0.0666667	7.13962	0.84917
comp2272169_c2_seq2_m.72626	-0.685914	-0.238419	0.0555235	0.0681818	7.13962	0.84917
comp2272491_c1_seq4_m.73302	0.689025	0.241781	0.055328	0.0683761	7.13962	0.84917
comp2266882_c0_seq1_m.62832	-0.689097	-0.252792	0.0552378	0.0685714	7.13962	0.84917
comp2277740_c0_seq2_m.86258	0.68206	0.275315	0.0562726	0.0706215	7.13962	0.84917
comp2274787_c0_seq1_m.78332	0.684145	0.236564	0.0560949	0.0708215	7.13962	0.84917
comp2278222_c0_seq3_m.88116	0.673217	0.229099	0.0580592	0.0722222	7.13962	0.84917
comp2259230_c0_seq1_m.50704	-0.67485	-0.221666	0.0576852	0.0724234	7.13962	0.84917
comp2271124_c0_seq1_m.70454	0.676081	0.219526	0.057391	0.0726257	7.13962	0.84917
comp2265464_c0_seq1_m.60472	0.677266	0.269129	0.0571062	0.0728291	7.13962	0.84917
comp2275720_c0_seq4_m.80482	0.677419	0.23701	0.057016	0.0730337	7.13962	0.84917
comp1199432_c0_seq1_m.1095	0.678845	0.247092	0.0569258	0.0732394	7.13962	0.84917
comp2271419_c1_seq1_m.71009	-0.672077	-0.256621	0.0582547	0.0747922	7.13962	0.84917
comp2276668_c0_seq1_m.83017	0.663362	0.246882	0.0598731	0.0828729	7.13962	0.84917
comp2265328_c0_seq2_m.60206	0.655134	0.258386	0.0618308	0.0881543	7.13962	0.84917
gnl_Pdu_trscr_assembly_1_11607_m.26425	-0.645069	-0.236528	0.0635113	0.0889488	7.13962	0.84917
comp2271906_c0_seq1_m.72107	-0.646616	-0.253835	0.063235	0.0891892	7.13962	0.84917
comp2265703_c0_seq1_m.60844	0.647478	0.2375	0.0631447	0.0894309	7.13962	0.84917
comp2251806_c0_seq1_m.40480	0.650308	0.212224	0.0627585	0.0896739	7.13962	0.84917
gnl_Pdu_trscr_assembly_1_1986_m.5697	-0.65142	-0.222046	0.0626682	0.0899183	7.13962	0.84917
comp2258609_c0_seq1_m.49647	-0.651746	-0.237162	0.062578	0.0901639	7.13962	0.84917
comp2272724_c0_seq1_m.73818	-0.652138	-0.221615	0.0624878	0.090411	7.13962	0.84917
comp2271168_c0_seq1_m.70546	-0.652264	-0.2187	0.0623976	0.0906593	7.13962	0.84917
comp1326513_c0_seq1_m.1923	0.642721	0.289853	0.0640056	0.094086	7.13962	0.84917
comp2004487_c0_seq1_m.4269	0.64047	0.343393	0.0646476	0.0962567	7.13962	0.84917
comp2263508_c0_seq1_m.57408	-0.64193	-0.287524	0.0642895	0.0965147	7.13962	0.84917
comp2251594_c0_seq1_m.40214	0.635491	0.288808	0.0657641	0.0978836	7.13962	0.84917
comp2272182_c0_seq2_m.72649	-0.636702	-0.234226	0.0654868	0.0981432	7.13962	0.84917
comp2268417_c0_seq2_m.65592	-0.637736	-0.288298	0.0652143	0.0984043	7.13962	0.84917
comp2274242_c0_seq2_m.77187	0.637906	0.225574	0.0649352	0.0986667	7.13962	0.84917
comp2264302_c0_seq2_m.58699	-0.633336	-0.227339	0.0663515	0.1	7.13962	0.84917

## Sheet: IM_FRFM vs PM_FRFM_Female
	d	logFC	pvalue	FDR	Z	R
comp1194290_c0_seq1_m.781	-1.22454	-1.33886	0.00126316	0	11.0617	0.897
comp1196959_c0_seq2_m.1014	0.929975	0.898494	0.00508177	0	11.0617	0.897
comp1953077_c0_seq1_m.3483	-0.907584	-0.951874	0.00526222	0	11.0617	0.897
comp2141997_c0_seq1_m.7386	0.909951	0.960254	0.00517199	0	11.0617	0.897
comp2189372_c0_seq1_m.11219	-1.57731	-1.63967	0.00081203	0	11.0617	0.897
comp2208474_c0_seq1_m.14351	-1.34946	-1.33945	0.000902256	0	11.0617	0.897
comp2223962_c0_seq7_m.19686	-1.15942	-1.09665	0.00171429	0	11.0617	0.897
comp2229729_c0_seq1_m.22264	1.04036	1.02456	0.00271429	0	11.0617	0.897
comp2237468_c0_seq1_m.27022	-2.02414	-2.21947	9.02256e-05	0	11.0617	0.897
comp2242407_c0_seq1_m.30845	1.09103	1.2065	0.00207519	0	11.0617	0.897
comp2245014_c0_seq2_m.33157	-1.07363	-1.1269	0.00234586	0	11.0617	0.897
comp2247098_c0_seq1_m.35275	1.03396	1.23696	0.00289474	0	11.0617	0.897
comp2254346_c0_seq1_m.43876	1.03284	1.00855	0.00298496	0	11.0617	0.897
comp2257070_c0_seq2_m.47512	1.30467	1.27587	0.000992481	0	11.0617	0.897
comp2257585_c0_seq1_m.48216	0.976594	0.946553	0.00408271	0	11.0617	0.897
comp2262731_c0_seq1_m.56213	0.886306	0.864928	0.0055282	0	11.0617	0.897
comp2263921_c0_seq2_m.58101	1.06198	1.00579	0.00253383	0	11.0617	0.897
comp2264838_c0_seq3_m.59436	-1.15201	-1.26225	0.00180451	0	11.0617	0.897
comp2264888_c0_seq4_m.59493	1.21064	1.20005	0.00144361	0	11.0617	0.897
comp2265656_c0_seq3_m.60780	1.2198	1.13737	0.00135338	0	11.0617	0.897
comp2266841_c0_seq1_m.62766	0.999772	0.994508	0.00344361	0	11.0617	0.897
comp2268473_c1_seq1_m.65668	1.05077	1.08175	0.00262406	0	11.0617	0.897
comp2268869_c0_seq6_m.66344	1.03889	1.11943	0.00280451	0	11.0617	0.897
comp2268978_c0_seq1_m.66540	0.994209	0.941873	0.00381203	0	11.0617	0.897
comp2269185_c0_seq2_m.66963	-1.19536	-1.28349	0.00162406	0	11.0617	0.897
comp2269321_c1_seq1_m.67212	-1.02825	-1.02111	0.00326316	0	11.0617	0.897
comp2269459_c0_seq2_m.67456	0.939636	0.944112	0.00481109	0	11.0617	0.897
comp2270385_c0_seq11_m.69105	1.03075	1.1357	0.00317293	0	11.0617	0.897
comp2270576_c0_seq1_m.69463	0.965886	0.98351	0.00435338	0	11.0617	0.897
comp2271419_c1_seq1_m.71009	1.02296	0.977616	0.00335338	0	11.0617	0.897
comp2271594_c0_seq8_m.71451	-0.951881	-0.850668	0.00463064	0	11.0617	0.897
comp2271737_c1_seq2_m.71770	-1.74618	-1.82515	0.000541353	0	11.0617	0.897
comp2272435_c0_seq2_m.73201	0.997937	0.922875	0.0037218	0	11.0617	0.897
comp2272437_c1_seq1_m.73204	-1.98671	-2.36711	0.000180451	0	11.0617	0.897
comp2272691_c0_seq4_m.73750	1.29555	1.1891	0.00108271	0	11.0617	0.897
comp2272842_c0_seq2_m.74081	-0.982821	-1.09981	0.00399248	0	11.0617	0.897
comp2273900_c0_seq1_m.76336	-0.948556	-1.04348	0.00472086	0	11.0617	0.897
comp2273926_c0_seq5_m.76421	1.28263	1.24603	0.00117293	0	11.0617	0.897
comp2274137_c1_seq25_m.76929	-1.20842	-1.37134	0.00153383	0	11.0617	0.897
comp2274909_c0_seq7_m.78613	1.77696	1.75301	0.000360902	0	11.0617	0.897
comp2274909_c0_seq7_m.78615	1.76276	1.85836	0.000451128	0	11.0617	0.897
comp2275391_c0_seq1_m.79711	-0.976476	-1.01051	0.00417293	0	11.0617	0.897
comp2275714_c2_seq1_m.80469	-1.09506	-1.04004	0.00198496	0	11.0617	0.897
comp2275853_c0_seq1_m.80817	0.931564	0.854492	0.00499154	0	11.0617	0.897
comp2275893_c0_seq1_m.80933	-1.57783	-1.55803	0.000721805	0	11.0617	0.897
comp2276668_c0_seq1_m.83017	-0.932766	-0.923642	0.00490132	0	11.0617	0.897
comp2276805_c0_seq8_m.83380	0.899235	0.87468	0.00535244	0	11.0617	0.897
comp2277374_c0_seq2_m.85051	0.999397	0.946114	0.00353383	0	11.0617	0.897
comp2277416_c0_seq3_m.85174	0.969973	0.978796	0.00426316	0	11.0617	0.897
comp2278010_c1_seq9_m.87231	-1.0751	-1.01496	0.00225564	0	11.0617	0.897
comp2280591_c0_seq1_m.91233	1.10413	1.11029	0.00189474	0	11.0617	0.897
gnl_Pdu_trscr_assembly_1_12794_m.61443	1.08111	0.982623	0.00216541	0	11.0617	0.897
gnl_Pdu_trscr_assembly_1_15590_m.29311	1.7782	1.94573	0.000270677	0	11.0617	0.897
gnl_Pdu_trscr_assembly_1_200732_m.91055	-0.960122	-1.10387	0.00454041	0	11.0617	0.897
gnl_Pdu_trscr_assembly_1_200732_m.91056	-1.62256	-1.70722	0.000631579	0	11.0617	0.897
gnl_Pdu_trscr_assembly_1_3048_m.12984	0.991784	1.21151	0.00390226	0	11.0617	0.897
gnl_Pdu_trscr_assembly_1_7327_m.81715	-0.885459	-0.980966	0.00561842	0	11.0617	0.897
comp2276528_c1_seq4_m.82615	0.747852	0.71071	0.0103365	0.01	11.0617	0.897
comp2279340_c0_seq1_m.91103	0.748837	0.746929	0.0102462	0.010101	11.0617	0.897
comp2276577_c0_seq8_m.92288	0.753277	0.72953	0.010156	0.0102041	11.0617	0.897
comp2265768_c0_seq2_m.60943	-0.755816	-0.851864	0.0100658	0.0103093	11.0617	0.897
comp2257905_c0_seq1_m.48664	-0.761924	-0.780153	0.00997556	0.0104167	11.0617	0.897
comp1953876_c0_seq1_m.3493	0.76267	0.776057	0.00988534	0.0105263	11.0617	0.897
comp2270876_c0_seq2_m.70018	-0.763058	-0.884049	0.00979511	0.0106383	11.0617	0.897
comp2264302_c0_seq2_m.58699	-0.765259	-0.754461	0.00970489	0.0107527	11.0617	0.897
comp2279748_c0_seq1_m.91174	-0.766869	-0.715019	0.00950752	0.0108696	11.0617	0.897
comp2268937_c0_seq1_m.66472	0.770437	0.705831	0.00941729	0.010989	11.0617	0.897
comp2278405_c0_seq22_m.88893	0.771753	0.721	0.00932707	0.0111111	11.0617	0.897
comp2274295_c0_seq2_m.77311	0.772909	0.740307	0.00923684	0.011236	11.0617	0.897
comp2225664_c0_seq1_m.20382	0.775035	0.745533	0.00914662	0.0113636	11.0617	0.897
comp2265471_c0_seq5_m.60488	0.776795	0.808083	0.00905639	0.0114943	11.0617	0.897
comp2269009_c0_seq1_m.66627	-0.779639	-0.756927	0.00896617	0.0116279	11.0617	0.897
comp2272882_c0_seq14_m.74184	-0.779826	-0.84051	0.00887594	0.0117647	11.0617	0.897
comp2277947_c0_seq1_m.86990	-0.782358	-0.749666	0.00857519	0.0119048	11.0617	0.897
comp2278077_c0_seq3_m.87468	0.785133	0.820617	0.00837782	0.0120482	11.0617	0.897
comp2277132_c1_seq1_m.84335	0.786976	0.689556	0.00818233	0.0121951	11.0617	0.897
comp2262241_c0_seq1_m.55434	0.787535	0.786999	0.00799436	0.0123457	11.0617	0.897
comp1910314_c0_seq1_m.2848	-0.800246	-0.927216	0.00790414	0.0125	11.0617	0.897
comp2280482_c0_seq1_m.91228	-0.802183	-0.803588	0.00781391	0.0126582	11.0617	0.897
comp2277142_c0_seq6_m.84365	0.805407	0.851171	0.00772368	0.0128205	11.0617	0.897
comp2270404_c0_seq3_m.69137	-0.805608	-0.893353	0.00763346	0.012987	11.0617	0.897
comp2247821_c0_seq5_m.35979	0.806177	0.9257	0.00754323	0.0131579	11.0617	0.897
comp2138952_c0_seq1_m.6867	0.80828	0.802207	0.00745301	0.0133333	11.0617	0.897
comp2252059_c0_seq1_m.40786	0.811928	0.797695	0.00736278	0.0135135	11.0617	0.897
comp2263787_c0_seq3_m.57874	0.814641	0.844579	0.00727256	0.0136986	11.0617	0.897
comp2254426_c0_seq1_m.43954	-0.817771	-0.986245	0.00718233	0.0138889	11.0617	0.897
comp2281676_c0_seq1_m.91255	0.823179	0.939331	0.00709211	0.0140845	11.0617	0.897
comp2274106_c1_seq2_m.76871	0.831542	0.913647	0.00689662	0.0142857	11.0617	0.897
comp2265049_c0_seq3_m.59764	0.831573	0.900754	0.00680639	0.0144928	11.0617	0.897
comp2266701_c0_seq3_m.62512	0.840471	1.00693	0.00671617	0.0147059	11.0617	0.897
comp2277680_c0_seq25_m.86056	-0.841581	-0.911126	0.00662594	0.0149254	11.0617	0.897
comp2265328_c0_seq2_m.60206	-0.842548	-1.18768	0.00653571	0.0151515	11.0617	0.897
comp2278480_c0_seq4_m.89330	0.848348	0.7884	0.00644549	0.0153846	11.0617	0.897
comp2201786_c0_seq1_m.13247	0.849727	0.984012	0.00635526	0.015625	11.0617	0.897
comp2261379_c0_seq1_m.54133	0.852839	0.965306	0.00626504	0.015873	11.0617	0.897
gnl_Pdu_trscr_assembly_1_16296_m.13041	-0.855099	-0.856104	0.00617481	0.016129	11.0617	0.897
comp2275674_c1_seq1_m.80370	-0.857712	-0.953077	0.00608459	0.0163934	11.0617	0.897
comp2270845_c1_seq1_m.69967	0.858447	0.869266	0.00599436	0.0166667	11.0617	0.897
comp2267571_c0_seq4_m.64058	-0.877342	-0.965535	0.00590414	0.0169492	11.0617	0.897
comp2250982_c0_seq1_m.39507	0.705656	0.785909	0.0132566	0.017094	11.0617	0.897
comp2270220_c0_seq1_m.68776	0.707726	0.73635	0.0131664	0.0172414	11.0617	0.897
comp2277945_c0_seq2_m.86985	0.878057	0.900003	0.00581391	0.0172414	11.0617	0.897
comp2273765_c1_seq6_m.76032	0.709293	0.812133	0.0129709	0.0173913	11.0617	0.897
comp2249227_c0_seq1_m.37479	-0.718594	-0.769865	0.0126861	0.0175439	11.0617	0.897
comp2257070_c0_seq2_m.47513	0.720312	0.665157	0.0124906	0.0176991	11.0617	0.897
comp2273417_c0_seq5_m.75297	-0.721626	-0.676969	0.0124004	0.0178571	11.0617	0.897
comp2252506_c0_seq1_m.41372	0.721886	0.824393	0.0123102	0.018018	11.0617	0.897
gnl_Pdu_trscr_assembly_1_7274_m.39240	0.723154	0.703444	0.0122199	0.0181818	11.0617	0.897
comp2280694_c0_seq1_m.91236	0.725472	0.847292	0.0121297	0.0183486	11.0617	0.897
comp2250550_c1_seq1_m.39064	0.728001	0.738566	0.0120395	0.0185185	11.0617	0.897
comp2260960_c0_seq2_m.53456	0.731808	0.723484	0.011844	0.0186916	11.0617	0.897
gi_613484551	0.733287	0.701972	0.0114756	0.0188679	11.0617	0.897
comp2269158_c0_seq1_m.66914	0.734184	0.669314	0.0113853	0.0190476	11.0617	0.897
comp2347711_c0_seq1_contamination_m.91628	-0.738069	-1.20206	0.0112951	0.0192308	11.0617	0.897
gnl_Pdu_trscr_assembly_1_17049_m.35386	-0.740665	-0.894839	0.0109925	0.0194175	11.0617	0.897
comp2242933_c0_seq1_m.31351	-0.74106	-0.823491	0.0107077	0.0196078	11.0617	0.897
comp2278630_c0_seq8_m.90809	-0.743217	-0.710745	0.0106175	0.019802	11.0617	0.897
comp2280536_c0_seq1_m.91231	-0.671349	-0.714532	0.015156	0.0238095	11.0617	0.897
comp2279567_c0_seq1_m.91146	0.671495	0.699982	0.014968	0.024	11.0617	0.897
comp2278276_c0_seq16_m.88350	0.674222	0.637328	0.0146729	0.0241935	11.0617	0.897
comp2274262_c0_seq1_m.77231	-0.678505	-0.789502	0.0143008	0.0243902	11.0617	0.897
comp2263394_c0_seq1_m.57263	0.680253	0.773663	0.0141128	0.0245902	11.0617	0.897
comp1194294_c0_seq1_m.785	0.685757	1.00965	0.0138102	0.0247934	11.0617	0.897
comp2260394_c0_seq1_m.52394	-0.68967	-0.623649	0.0137199	0.025	11.0617	0.897
comp2275933_c0_seq1_m.81045	0.698885	0.636481	0.0135226	0.0252101	11.0617	0.897
comp2278474_c0_seq1_m.89294	-0.699439	-0.734708	0.0134323	0.0254237	11.0617	0.897
comp2252746_c0_seq1_m.41651	-0.651047	-0.657825	0.0168308	0.028777	11.0617	0.897
comp2232290_c0_seq2_m.23637	0.652423	0.706583	0.0166353	0.0289855	11.0617	0.897
comp2267483_c0_seq3_m.63903	-0.654966	-0.736147	0.0165451	0.0291971	11.0617	0.897
comp1785956_c0_seq1_m.2259	0.606211	0.589505	0.0219427	0.0294118	11.0617	0.897
comp2278480_c1_seq1_m.89333	0.65622	0.601205	0.0164549	0.0294118	11.0617	0.897
comp2275191_c1_seq2_m.79282	0.607416	0.558946	0.0217632	0.0295858	11.0617	0.897
gnl_Pdu_trscr_assembly_1_14638_m.60097	-0.65794	-0.69632	0.016172	0.0296296	11.0617	0.897
comp2272547_c0_seq4_m.73421	-0.6111	-0.586274	0.0214013	0.0297619	11.0617	0.897
comp2268340_c1_seq1_m.65478	0.66016	0.618392	0.0160818	0.0298507	11.0617	0.897
comp2252847_c0_seq1_m.41763	0.611229	0.583654	0.0212237	0.0299401	11.0617	0.897
comp2271595_c0_seq2_m.71452	0.661669	0.662714	0.0159915	0.0300752	11.0617	0.897
comp1244797_c0_seq1_m.1278	0.611671	0.590091	0.0211335	0.0301205	11.0617	0.897
comp2270905_c1_seq5_m.70069	-0.612065	-0.912772	0.020938	0.030303	11.0617	0.897
comp2273778_c1_seq23_m.76059	0.663174	0.630672	0.0157942	0.030303	11.0617	0.897
comp2278238_c0_seq6_m.88188	0.614659	0.595013	0.0208477	0.0304878	11.0617	0.897
comp2258609_c0_seq1_m.49647	0.663817	0.70514	0.0157039	0.0305344	11.0617	0.897
comp2278485_c0_seq1_m.89374	0.617416	0.646181	0.0206692	0.0306748	11.0617	0.897
comp2277729_c0_seq10_m.86207	0.663828	0.637962	0.0156137	0.0307692	11.0617	0.897
comp2236614_c0_seq1_m.26450	0.617723	0.569384	0.0205789	0.0308642	11.0617	0.897
comp2269345_c0_seq1_m.67253	0.665666	0.620311	0.0155235	0.0310078	11.0617	0.897
gnl_Pdu_trscr_assembly_1_1514_m.69841	0.617773	0.598895	0.0204887	0.0310559	11.0617	0.897
comp2277933_c1_seq7_m.86946	0.61866	0.567489	0.0203985	0.03125	11.0617	0.897
comp2278605_c1_seq8_m.90480	0.665861	0.597163	0.0154333	0.03125	11.0617	0.897
comp2252790_c0_seq1_m.41691	0.622543	0.727298	0.020094	0.0314465	11.0617	0.897
comp2272319_c0_seq24_m.72950	0.668655	0.66006	0.015343	0.0314961	11.0617	0.897
comp2248791_c1_seq1_m.37027	0.622543	0.642337	0.0200038	0.0316456	11.0617	0.897
comp2260103_c0_seq1_m.51994	-0.624438	-0.650896	0.0198261	0.0318471	11.0617	0.897
comp2232909_c0_seq1_m.24034	0.625594	0.660875	0.0196476	0.0320513	11.0617	0.897
comp1838578_c0_seq1_m.2293	0.627832	0.690281	0.0194521	0.0322581	11.0617	0.897
comp2257487_c0_seq1_m.48064	-0.628766	-0.628394	0.0193618	0.0324675	11.0617	0.897
comp2254641_c1_seq1_m.44200	-0.592358	-0.577237	0.0242744	0.0326087	11.0617	0.897
comp2275523_c0_seq29_m.80039	0.629104	0.646392	0.0191823	0.0326797	11.0617	0.897
comp2277908_c1_seq11_m.86865	0.592437	0.635422	0.0241842	0.0327869	11.0617	0.897
comp2272863_c1_seq5_m.74143	-0.630439	-0.63872	0.018985	0.0328947	11.0617	0.897
comp2275358_c0_seq1_m.79627	-0.592754	-0.557286	0.024094	0.032967	11.0617	0.897
comp2270228_c0_seq1_m.68797	0.630532	0.578831	0.0188947	0.0331126	11.0617	0.897
comp2263073_c0_seq1_m.56786	-0.59316	-0.568294	0.0238008	0.0331492	11.0617	0.897
comp2269171_c0_seq3_m.66933	0.631376	0.613387	0.0188045	0.0333333	11.0617	0.897
comp2271637_c0_seq1_m.71562	0.595073	0.584409	0.0235197	0.0333333	11.0617	0.897
comp2261716_c0_seq2_m.54597	0.595415	0.551059	0.0234295	0.0335196	11.0617	0.897
comp2275191_c0_seq1_m.79281	0.631965	0.579492	0.0185376	0.033557	11.0617	0.897
comp2265464_c0_seq1_m.60472	-0.598316	-0.679761	0.0230508	0.0337079	11.0617	0.897
comp2266931_c0_seq5_m.62893	0.632976	0.685747	0.0184474	0.0337838	11.0617	0.897
comp2273038_c0_seq3_m.74522	0.600564	0.581142	0.0229605	0.0338983	11.0617	0.897
comp2258619_c0_seq2_m.49656	0.633362	0.693358	0.0183571	0.0340136	11.0617	0.897
gnl_Pdu_trscr_assembly_1_11633_m.54013	-0.601397	-0.711661	0.0227782	0.0340909	11.0617	0.897
comp2276825_c0_seq1_m.83424	0.635215	0.591309	0.0181692	0.0342466	11.0617	0.897
comp2274783_c0_seq9_m.78326	0.602226	0.616818	0.022688	0.0342857	11.0617	0.897
comp2269987_c0_seq2_m.68354	0.602744	0.581507	0.0225977	0.0344828	11.0617	0.897
comp2272782_c0_seq2_m.73955	-0.636007	-0.707579	0.0180789	0.0344828	11.0617	0.897
comp2245053_c0_seq1_m.33185	0.603661	0.65079	0.0224098	0.0346821	11.0617	0.897
comp2204754_c0_seq1_m.13720	0.638511	0.673803	0.0176711	0.0347222	11.0617	0.897
comp2278509_c0_seq8_m.89637	0.604105	0.564084	0.0223195	0.0348837	11.0617	0.897
comp2263508_c0_seq1_m.57408	0.639108	0.633247	0.0175808	0.034965	11.0617	0.897
comp2263612_c1_seq1_m.57550	-0.604152	-0.663932	0.0222293	0.0350877	11.0617	0.897
comp2271113_c0_seq5_m.70438	0.640238	0.669547	0.0174906	0.0352113	11.0617	0.897
comp2273747_c0_seq4_m.75989	0.645528	0.623047	0.0172133	0.035461	11.0617	0.897
comp2246502_c0_seq1_m.34680	-0.646906	-0.740919	0.0171231	0.0357143	11.0617	0.897
comp2269850_c0_seq1_m.68122	0.591248	0.622538	0.0245385	0.0378378	11.0617	0.897
comp2232641_c0_seq7_m.23875	-0.57989	-0.737017	0.0265009	0.0410256	11.0617	0.897
comp2267341_c0_seq1_m.63653	-0.581073	-0.551558	0.0263214	0.0412371	11.0617	0.897
gnl_Pdu_trscr_assembly_1_17807_m.62055	0.581612	0.552013	0.0262312	0.0414508	11.0617	0.897
comp2269220_c0_seq10_m.67031	0.582558	0.667239	0.026141	0.0416667	11.0617	0.897
comp2273141_c0_seq2_m.74737	0.583886	0.54241	0.0258656	0.0418848	11.0617	0.897
comp2272118_c0_seq11_m.72524	0.588605	0.576734	0.0253769	0.0421053	11.0617	0.897
gnl_Pdu_trscr_assembly_1_3867_m.65412	0.588899	0.649465	0.0252867	0.042328	11.0617	0.897
comp2261355_c0_seq1_m.54106	-0.588933	-0.677487	0.0251964	0.0425532	11.0617	0.897
comp2278133_c0_seq3_m.87701	0.58936	0.562934	0.0251062	0.0427807	11.0617	0.897
comp2261334_c1_seq1_m.54085	-0.590544	-0.826947	0.024812	0.0430108	11.0617	0.897
comp2269848_c0_seq4_m.68115	0.579464	0.619627	0.0266767	0.0459184	11.0617	0.897
comp2265883_c1_seq1_m.61140	0.576626	0.617339	0.0274258	0.05	11.0617	0.897
comp2276377_c0_seq2_m.82218	-0.57708	-0.510621	0.0273355	0.0502513	11.0617	0.897
comp2232805_c0_seq1_m.23974	0.577082	0.539558	0.0272453	0.0505051	11.0617	0.897
comp2274999_c0_seq4_m.78837	0.579291	0.567709	0.0268524	0.0507614	11.0617	0.897
comp1876805_c0_seq1_m.2339	0.564175	0.515155	0.0292086	0.0528846	11.0617	0.897
comp2279450_c0_seq1_m.91124	0.564198	0.556876	0.0291184	0.0531401	11.0617	0.897
comp2266441_c0_seq1_m.62027	0.566168	0.594503	0.0287434	0.0533981	11.0617	0.897
comp2261876_c0_seq1_m.54865	0.566904	0.602118	0.0285479	0.0536585	11.0617	0.897
comp2261018_c0_seq2_m.53614	-0.567288	-0.581688	0.0283524	0.0539216	11.0617	0.897
comp2276750_c0_seq1_m.83194	0.567998	0.517617	0.0282622	0.0541872	11.0617	0.897
comp2268906_c0_seq4_m.66401	0.57146	0.540852	0.027968	0.0544554	11.0617	0.897
comp2277388_c0_seq8_m.85093	-0.574333	-0.563022	0.0278778	0.0547264	11.0617	0.897
comp2268115_c0_seq2_m.65034	-0.556435	-0.564725	0.0302585	0.0574163	11.0617	0.897
comp2262197_c0_seq1_m.55346	0.553806	0.555788	0.0305526	0.0619048	11.0617	0.897
comp2265326_c0_seq3_m.60204	0.54913	0.537219	0.0313365	0.0663507	11.0617	0.897
comp1916779_c0_seq1_m.2944	-0.52283	-0.531193	0.0368299	0.0865801	11.0617	0.897
comp2275406_c1_seq7_m.79751	0.526886	0.506443	0.0362838	0.0869565	11.0617	0.897
comp2224614_c0_seq1_m.19939	0.529218	0.497995	0.0359182	0.0873362	11.0617	0.897
comp2275295_c1_seq2_m.79482	0.530118	0.609984	0.0357227	0.0877193	11.0617	0.897
comp2265029_c1_seq4_m.59734	0.530322	0.527708	0.0355432	0.0881057	11.0617	0.897
comp2270650_c0_seq1_m.69588	-0.532238	-0.515106	0.035453	0.0884956	11.0617	0.897
comp2287273_c0_seq1_contamination_m.91384	0.532329	0.548251	0.0353628	0.0888889	11.0617	0.897
comp2231610_c0_seq1_m.23229	0.532485	0.499221	0.0352726	0.0892857	11.0617	0.897
comp2276968_c0_seq3_m.83862	0.545994	0.507941	0.0321053	0.0896226	11.0617	0.897
comp2269814_c0_seq1_m.68069	0.533522	0.500307	0.035094	0.0896861	11.0617	0.897
comp2269201_c0_seq1_m.67004	-0.533822	-0.528861	0.0350038	0.0900901	11.0617	0.897
comp2263771_c0_seq2_m.57851	0.534996	0.533154	0.034828	0.0904977	11.0617	0.897
comp2259230_c0_seq1_m.50704	-0.522291	-0.631977	0.0371241	0.0905172	11.0617	0.897
comp2269593_c0_seq3_m.67692	0.536533	0.493659	0.0345536	0.0909091	11.0617	0.897
comp2276804_c0_seq1_m.83376	-0.537069	-0.579232	0.0344633	0.0913242	11.0617	0.897
comp2138394_c0_seq1_m.6761	0.537758	0.520007	0.0342679	0.0917431	11.0617	0.897
comp2271413_c1_seq5_m.70995	-0.539113	-0.601642	0.0340019	0.0921659	11.0617	0.897
comp2277982_c0_seq2_m.87136	0.541849	0.544772	0.0332406	0.0925926	11.0617	0.897
comp2276966_c0_seq13_m.83854	-0.541974	-0.50283	0.0331504	0.0930233	11.0617	0.897
comp2274358_c0_seq3_m.77437	0.542417	0.494266	0.0330602	0.0934579	11.0617	0.897
comp2278333_c0_seq10_m.88591	-0.542776	-0.60566	0.0329699	0.0938967	11.0617	0.897
gnl_Pdu_trscr_assembly_1_7964_m.49648	0.517757	0.480346	0.0379831	0.0944206	11.0617	0.897
comp2275662_c1_seq10_m.80344	0.511236	0.491004	0.0399417	0.0946502	11.0617	0.897
comp2279445_c0_seq1_m.91120	0.51134	0.541727	0.0397462	0.0950413	11.0617	0.897
comp2245511_c0_seq1_m.33658	-0.511931	-0.573944	0.039656	0.0954357	11.0617	0.897
comp2272491_c1_seq4_m.73302	-0.512342	-0.498034	0.0395658	0.0958333	11.0617	0.897
comp2257633_c0_seq1_m.48279	-0.512414	-0.487649	0.0394756	0.0962343	11.0617	0.897
comp2278378_c0_seq4_m.88778	0.514463	0.496481	0.0390949	0.0966387	11.0617	0.897
comp2245721_c0_seq1_m.33844	-0.514608	-0.594622	0.0390047	0.0970464	11.0617	0.897
comp2271675_c0_seq2_m.71655	0.516705	0.484546	0.0384483	0.0974576	11.0617	0.897
comp2262465_c0_seq5_m.55795	0.51717	0.642665	0.0382603	0.0978723	11.0617	0.897
comp2274238_c3_seq9_m.77182	0.517193	0.48339	0.0381701	0.0982906	11.0617	0.897
comp2274301_c0_seq6_m.77327	0.50855	0.479126	0.0407838	0.0983607	11.0617	0.897
comp2270279_c0_seq7_m.68904	-0.495024	-0.548778	0.0460038	0.0996169	11.0617	0.897
comp2244716_c0_seq1_m.32883	0.496185	0.508946	0.0455432	0.1	11.0617	0.897

## Sheet: IM_FRFM vs PM_FRFM_Male
	d	logFC	pvalue	FDR	Z	R
comp1194290_c0_seq1_m.781	-0.721834	-1.39642	0.000902256	0	4.43078	0.723733
comp1965369_c0_seq1_contamination_m.3664	-0.605604	-1.14753	0.00207895	0	4.43078	0.723733
comp2189372_c0_seq1_m.11219	-0.702372	-1.29446	0.00108929	0	4.43078	0.723733
comp2208474_c0_seq1_m.14351	-0.670782	-1.1983	0.00135996	0	4.43078	0.723733
comp2232909_c0_seq1_m.24034	0.880375	1.79234	0.000541353	0	4.43078	0.723733
comp2237468_c0_seq1_m.27022	-0.906063	-1.74923	0.000270677	0	4.43078	0.723733
comp2247098_c0_seq1_m.35275	0.612886	1.1027	0.00180639	0	4.43078	0.723733
comp2254346_c0_seq1_m.43876	0.580299	1.02499	0.00235714	0	4.43078	0.723733
comp2257070_c0_seq2_m.47512	0.63493	1.09584	0.00154041	0	4.43078	0.723733
comp2264888_c0_seq4_m.59493	0.611018	1.08987	0.00189662	0	4.43078	0.723733
comp2269185_c0_seq2_m.66963	-0.677278	-1.22454	0.00126974	0	4.43078	0.723733
comp2270385_c0_seq11_m.69105	0.583474	1.1293	0.00226692	0	4.43078	0.723733
comp2271737_c1_seq2_m.71770	-1.03122	-1.89762	0.000180451	0	4.43078	0.723733
comp2272437_c1_seq1_m.73204	-1.21074	-2.30657	9.02256e-05	0	4.43078	0.723733
comp2272691_c0_seq4_m.73750	0.698016	1.16511	0.00117951	0	4.43078	0.723733
comp2274137_c1_seq25_m.76929	-0.655798	-1.24071	0.00145019	0	4.43078	0.723733
comp2274909_c0_seq7_m.78613	0.888869	1.59224	0.000451128	0	4.43078	0.723733
comp2274909_c0_seq7_m.78615	0.763697	1.44785	0.00081203	0	4.43078	0.723733
comp2275893_c0_seq1_m.80933	-0.81215	-1.44646	0.000631579	0	4.43078	0.723733
comp2280591_c0_seq1_m.91233	0.624336	1.03764	0.00163064	0	4.43078	0.723733
gnl_Pdu_trscr_assembly_1_15590_m.29311	0.797307	1.52164	0.000721805	0	4.43078	0.723733
gnl_Pdu_trscr_assembly_1_200732_m.91056	-0.901942	-1.61467	0.000360902	0	4.43078	0.723733
comp2271419_c1_seq1_m.71009	0.48442	0.823011	0.00476316	0.025641	4.43078	0.723733
comp2267571_c0_seq4_m.64058	-0.495867	-0.926144	0.00467293	0.0263158	4.43078	0.723733
comp2269324_c0_seq1_m.67217	-0.498116	-1.33408	0.00429511	0.027027	4.43078	0.723733
comp2262465_c0_seq5_m.55795	0.498473	0.918446	0.00420489	0.0277778	4.43078	0.723733
comp2263787_c0_seq3_m.57874	0.49983	0.860877	0.00402726	0.0285714	4.43078	0.723733
comp2266473_c1_seq14_m.62086	-0.503488	-1.12393	0.00393703	0.0294118	4.43078	0.723733
gnl_Pdu_trscr_assembly_1_3048_m.12984	0.511726	0.911336	0.00363252	0.030303	4.43078	0.723733
comp2223962_c0_seq7_m.19686	-0.518182	-0.908178	0.00354229	0.03125	4.43078	0.723733
comp2245014_c0_seq2_m.33157	-0.518453	-0.950996	0.00345207	0.0322581	4.43078	0.723733
gnl_Pdu_trscr_assembly_1_7327_m.81715	-0.525443	-0.982301	0.00336184	0.0333333	4.43078	0.723733
comp2266701_c0_seq3_m.62512	0.528945	1.07621	0.00316447	0.0344828	4.43078	0.723733
comp2264838_c0_seq3_m.59436	-0.532952	-1.00598	0.00307425	0.0357143	4.43078	0.723733
gnl_Pdu_trscr_assembly_1_200732_m.91055	-0.538998	-1.0344	0.00289662	0.037037	4.43078	0.723733
comp2278010_c1_seq9_m.87231	-0.543434	-0.891575	0.00280639	0.0384615	4.43078	0.723733
comp2273926_c0_seq5_m.76421	0.550773	0.984013	0.00271617	0.04	4.43078	0.723733
comp2275391_c0_seq1_m.79711	-0.551353	-0.988737	0.00262594	0.0416667	4.43078	0.723733
comp2268473_c1_seq1_m.65668	0.571336	0.998822	0.00253571	0.0434783	4.43078	0.723733
comp2263921_c0_seq2_m.58101	0.477421	0.806292	0.00543609	0.05	4.43078	0.723733
comp2242933_c0_seq1_m.31351	-0.47415	-0.892931	0.00609305	0.0697674	4.43078	0.723733
comp2265049_c0_seq3_m.59764	0.474953	0.856874	0.00600282	0.0714286	4.43078	0.723733
comp2252506_c0_seq1_m.41372	0.476472	0.845248	0.00581579	0.0731707	4.43078	0.723733
comp1910314_c0_seq1_m.2848	-0.431551	-0.840425	0.0103055	0.0833333	4.43078	0.723733
comp2280694_c0_seq1_m.91236	0.433663	0.759875	0.01011	0.0847458	4.43078	0.723733
comp2280536_c0_seq1_m.91231	-0.460096	-0.835501	0.00705733	0.0851064	4.43078	0.723733
comp2241424_c0_seq3_m.29932	0.43538	0.771573	0.00991447	0.0862069	4.43078	0.723733
comp2272435_c0_seq2_m.73201	0.462771	0.789691	0.00676222	0.0869565	4.43078	0.723733
comp2275674_c1_seq1_m.80370	-0.437969	-0.816516	0.00944831	0.0877193	4.43078	0.723733
comp2270845_c1_seq1_m.69967	0.468435	0.814662	0.0064765	0.0888889	4.43078	0.723733
comp2275714_c2_seq1_m.80469	-0.442274	-0.780189	0.00935808	0.0892857	4.43078	0.723733
comp2222959_c0_seq1_m.19328	-0.443241	-0.7464	0.00907331	0.0909091	4.43078	0.723733
comp2265328_c0_seq2_m.60206	-0.472935	-1.06263	0.00628102	0.0909091	4.43078	0.723733
comp2276668_c0_seq1_m.83017	-0.444487	-0.762508	0.00898308	0.0925926	4.43078	0.723733
comp2261379_c0_seq1_m.54133	0.446083	0.865184	0.00878571	0.0943396	4.43078	0.723733
comp2269321_c1_seq1_m.67212	-0.446272	-0.795124	0.00869549	0.0961538	4.43078	0.723733
comp2347711_c0_seq1_contamination_m.91628	-0.426283	-1.07696	0.0107838	0.0967742	4.43078	0.723733
comp2242407_c0_seq1_m.30845	0.450642	0.822277	0.00820959	0.0980392	4.43078	0.723733
comp1196959_c0_seq2_m.1014	0.428434	0.727727	0.0105883	0.0983607	4.43078	0.723733
gnl_Pdu_trscr_assembly_1_12794_m.61443	0.452749	0.750972	0.0080141	0.1	4.43078	0.723733

## Sheet: PM_NM_Female vs PM_NM_Male
	d	logFC	pvalue	FDR	Z	R
comp2265386_c0_seq2_m.60299	6.6029	0.194291	0.00107519	0	2.18216	0.661349
comp2347711_c0_seq1_contamination_m.91628	7.16986	0.317315	0.000781955	0	2.18216	0.661349
gnl_Pdu_trscr_assembly_1_18157_m.24773	6.37233	0.174198	0.0013703	0	2.18216	0.661349
gnl_Pdu_trscr_assembly_1_20144_m.60515	-7.18877	-0.193911	0.000691729	0	2.18216	0.661349
gnl_Pdu_trscr_assembly_1_5614_m.48467	-10.8641	-0.182264	0.00018797	0	2.18216	0.661349

## Sheet: M_NM_Female vs M_NM_Male
	d	logFC	pvalue	FDR	Z	R
comp1785956_c0_seq1_m.2259	-2.78967	0.619458	0.00109211	0	7.45945	0.8236
comp2232805_c0_seq1_m.23974	4.49014	-0.675205	0.000360902	0	7.45945	0.8236
comp2232909_c0_seq1_m.24034	5.10834	-1.28191	9.02256e-05	0	7.45945	0.8236
comp2239022_c0_seq1_m.28102	2.94378	-0.888825	0.000734962	0	7.45945	0.8236
comp2254675_c0_seq1_m.44244	-2.7871	0.441575	0.00118233	0	7.45945	0.8236
comp2260058_c0_seq1_m.51934	-2.80535	0.640214	0.00100188	0	7.45945	0.8236
comp2263011_c0_seq1_m.56689	-4.78316	0.633731	0.000270677	0	7.45945	0.8236
comp2274537_c0_seq28_m.77857	2.96927	-0.597275	0.000644737	0	7.45945	0.8236
comp2277282_c0_seq11_m.84762	2.55018	-0.56476	0.00175658	0	7.45945	0.8236
gnl_Pdu_trscr_assembly_1_91632_m.21453	-4.82306	0.684151	0.000180451	0	7.45945	0.8236
comp2277972_c0_seq17_m.87106	2.15856	-0.315471	0.00447932	0.0833333	7.45945	0.8236
comp2272087_c1_seq4_m.72458	-2.2965	0.267672	0.00307331	0.0909091	7.45945	0.8236

[truncated: 4 more sheets: PM_FRFM_Female vs PM_FRFM_Male, IM_FRFM vs IM_NM, PM_FRFM_Female vs PM_NM_Female, PM_FRFM_Male vs PM_NM_Male]
