# Supplementary material for: Combined transcriptome and proteome profiling reveals specific molecular brain signatures for sex, maturation and circalunar clock phase
Source: eLife. 2019 Feb 15;8:e41556. doi: 10.7554/eLife.41556 (PMC6377233; doi:10.7554/eLife.41556)
Supplement: Figure 5—source data 7. — This file contains the LIMMA predicted DEPs for all 14 comparision made. Each comparison is contained within a separate tab. [file elife-41556-fig5-data7.xlsx]

## Sheet: IM_NM vs PM_NM_Female
	logFC	p.mod	q.mod	adjusted.pvalue
comp2189372_c0_seq1_m.11219	-0.772704	9.51e-06	0.000972625	0.00373367
gnl_Pdu_trscr_assembly_1_998_m.15062	-0.784873	1.45e-05	0.000972625	0.00373367
gnl_Pdu_trscr_assembly_1_7327_m.81715	-0.761849	1.79e-05	0.000972625	0.00373367
gnl_Pdu_trscr_assembly_1_16296_m.13041	-0.861504	1.85e-05	0.000972625	0.00373367
comp2257905_c0_seq1_m.48664	-0.874325	2.41e-05	0.000972625	0.00373367
comp2237468_c0_seq1_m.27022	-1.52983	2.75e-05	0.000972625	0.00373367
comp2274106_c1_seq2_m.76871	0.823949	2.91e-05	0.000972625	0.00373367
comp2267732_c0_seq2_m.64331	-0.710721	2.97e-05	0.000972625	0.00373367
comp2273926_c0_seq5_m.76421	1.31806	3.31e-05	0.000972625	0.00373367
comp2270279_c0_seq7_m.68904	-0.602098	3.51e-05	0.000972625	0.00373367
comp2269321_c1_seq1_m.67212	-0.790409	4.85e-05	0.00122273	0.00469375
comp2268115_c0_seq2_m.65034	-0.678092	5.96e-05	0.00137741	0.00528753
gnl_Pdu_trscr_assembly_1_14638_m.60097	-0.841996	7.1e-05	0.0014539	0.00558117
comp2256041_c0_seq1_m.46046	0.624711	7.63e-05	0.0014539	0.00558117
comp2275841_c0_seq1_m.80783	-0.761687	7.87e-05	0.0014539	0.00558117
comp2269987_c0_seq2_m.68354	0.759213	9.98e-05	0.00172909	0.00663755
comp2208474_c0_seq1_m.14351	-0.77992	0.000129066	0.00199711	0.00766642
comp2257939_c0_seq1_m.48703	-0.782762	0.000131607	0.00199711	0.00766642
comp2229729_c0_seq1_m.22264	0.97737	0.0001369	0.00199711	0.00766642
comp2263921_c0_seq2_m.58101	0.562284	0.000165888	0.00204182	0.00783804
comp2247988_c0_seq1_m.36173	-0.67779	0.000169746	0.00204182	0.00783804
comp2263115_c0_seq2_m.56831	0.778201	0.000173969	0.00204182	0.00783804
comp2253856_c0_seq1_m.43254	-0.627286	0.000176928	0.00204182	0.00783804
comp2261716_c0_seq2_m.54597	0.522444	0.000184772	0.00204182	0.00783804
comp2245014_c0_seq2_m.33157	-0.809169	0.000202159	0.00204182	0.00783804
comp2264838_c0_seq3_m.59436	-1.40895	0.000209587	0.00204182	0.00783804
comp2270404_c0_seq3_m.69137	-0.775466	0.000209859	0.00204182	0.00783804
comp1326513_c0_seq1_m.1923	-0.683856	0.000212893	0.00204182	0.00783804
comp2253217_c0_seq2_m.42336	-0.618029	0.000213631	0.00204182	0.00783804
comp2267172_c0_seq1_m.63318	0.641899	0.000232403	0.00204461	0.00784875
comp2268340_c1_seq1_m.65478	0.619635	0.000235629	0.00204461	0.00784875
comp1958245_c0_seq1_m.3536	-0.481908	0.000236053	0.00204461	0.00784875
comp2274278_c0_seq6_m.77267	-0.614024	0.000249441	0.0020951	0.00804258
comp2347711_c0_seq1_contamination_m.91628	-0.758442	0.000257969	0.002103	0.00807291
comp2278077_c0_seq3_m.87468	0.637078	0.000270441	0.00211569	0.00812161
comp2287273_c0_seq1_contamination_m.91384	0.430153	0.000276016	0.00211569	0.00812161
gnl_Pdu_trscr_assembly_1_12794_m.61443	0.924094	0.000282424	0.00211569	0.00812161
comp2277947_c0_seq1_m.86990	-0.527614	0.000297168	0.00216755	0.00832071
comp2257585_c0_seq1_m.48216	0.729961	0.000333891	0.00217903	0.00836475
comp2257395_c0_seq4_m.47951	1.38855	0.000339815	0.00217903	0.00836475
comp2277416_c0_seq3_m.85174	0.628421	0.000344138	0.00217903	0.00836475
comp2270876_c0_seq2_m.70018	-0.532882	0.000359583	0.00217903	0.00836475
comp2267571_c0_seq4_m.64058	-0.67788	0.00036247	0.00217903	0.00836475
comp1197507_c0_seq1_m.1032	-0.53133	0.000362676	0.00217903	0.00836475
comp1953876_c0_seq1_m.3493	0.687215	0.000391155	0.00217903	0.00836475
comp2276035_c1_seq16_m.81307	-0.554723	0.000391726	0.00217903	0.00836475
comp2226643_c0_seq1_m.20830	-0.558649	0.000394091	0.00217903	0.00836475
comp2203251_c0_seq1_m.13504	0.475975	0.000404698	0.00217903	0.00836475
comp2266692_c0_seq1_m.62504	0.651444	0.000405073	0.00217903	0.00836475
comp2252847_c0_seq1_m.41763	0.464784	0.000407652	0.00217903	0.00836475
comp2254641_c1_seq1_m.44200	-0.501117	0.000411971	0.00217903	0.00836475
comp1244797_c0_seq1_m.1278	0.434796	0.000419995	0.00217903	0.00836475
comp2259221_c0_seq1_m.50687	0.467024	0.000429119	0.00217903	0.00836475
comp2266841_c0_seq1_m.62766	0.689536	0.000439765	0.00217903	0.00836475
comp2224448_c0_seq1_m.19874	-0.497648	0.000443322	0.00217903	0.00836475
comp1910314_c0_seq1_m.2848	-0.671494	0.00044574	0.00217903	0.00836475
comp2252285_c0_seq2_m.41107	-0.459586	0.000448112	0.00217903	0.00836475
comp2141229_c0_seq1_m.7283	-0.539494	0.000458203	0.0021832	0.00838076
comp2276151_c0_seq3_m.81648	0.508734	0.000464723	0.0021832	0.00838076
comp2223962_c0_seq7_m.19686	-0.667726	0.000475963	0.00219873	0.00844041
comp2269185_c0_seq2_m.66963	-0.526108	0.000505002	0.00229464	0.00880856
comp2269158_c0_seq1_m.66914	0.422907	0.000514183	0.00229867	0.00882404
comp2279567_c0_seq1_m.91146	0.660988	0.000530749	0.00233507	0.00896377
comp2225664_c0_seq1_m.20382	0.444452	0.00053985	0.002338	0.00897501
comp2269009_c0_seq1_m.66627	-0.560295	0.000593149	0.00252931	0.0097094
comp2143334_c0_seq2_m.7649	0.61405	0.000616437	0.00258878	0.00993771
comp2277908_c1_seq11_m.86865	0.449376	0.000656055	0.00271404	0.0104185
comp2271737_c1_seq2_m.71770	-0.696699	0.000700243	0.00284129	0.010907
comp2248821_c1_seq2_m.37050	-0.406737	0.000707317	0.00284129	0.010907
comp2258609_c0_seq1_m.49647	0.433935	0.000753093	0.00297677	0.0114271
comp2262731_c0_seq1_m.56213	0.712576	0.000766526	0.00297677	0.0114271
comp2270576_c0_seq1_m.69463	0.789077	0.000786345	0.00297677	0.0114271
comp2268798_c0_seq2_m.66233	0.604204	0.000788195	0.00297677	0.0114271
comp2260394_c0_seq1_m.52394	-0.462902	0.000794743	0.00297677	0.0114271
comp2204754_c0_seq1_m.13720	0.603077	0.000832313	0.00301175	0.0115614
comp2277114_c1_seq1_m.84278	0.827324	0.000837023	0.00301175	0.0115614
comp2278480_c0_seq4_m.89330	0.565397	0.000843028	0.00301175	0.0115614
comp2272547_c0_seq4_m.73421	-0.43354	0.000848691	0.00301175	0.0115614
comp2265768_c0_seq2_m.60943	-0.707601	0.00085895	0.00301175	0.0115614
comp2275701_c1_seq1_m.80440	0.884686	0.000869275	0.00301175	0.0115614
comp2252746_c0_seq1_m.41651	-0.471775	0.000905947	0.00308808	0.0118544
comp2269611_c0_seq1_m.67728	0.484338	0.00091359	0.00308808	0.0118544
comp2272782_c0_seq2_m.73955	-0.569384	0.000926586	0.00309427	0.0118782
comp2269814_c0_seq1_m.68069	0.462093	0.000939591	0.00310035	0.0119015
comp1916779_c0_seq1_m.2944	-0.46801	0.000964916	0.00313661	0.0120407
comp1876805_c0_seq1_m.2339	0.43275	0.000977541	0.00313661	0.0120407
comp2273141_c0_seq2_m.74737	0.328552	0.000984528	0.00313661	0.0120407
gnl_Pdu_trscr_assembly_1_1514_m.69841	0.76847	0.00109538	0.00342333	0.0131413
comp2278010_c1_seq9_m.87231	-0.66559	0.00110703	0.00342333	0.0131413
comp2274693_c0_seq1_m.78142	0.498853	0.00111403	0.00342333	0.0131413
comp2263612_c1_seq1_m.57550	-0.331528	0.00113123	0.00342333	0.0131413
comp2278480_c1_seq1_m.89333	0.376687	0.00113628	0.00342333	0.0131413
comp2275523_c0_seq29_m.80039	0.685191	0.00116399	0.00346911	0.0133171
comp2249227_c0_seq1_m.37479	-0.389994	0.00118516	0.00349462	0.013415
comp2279536_c0_seq1_m.91140	-0.445699	0.00128039	0.00372068	0.0142828
comp2271567_c0_seq1_m.71391	0.547034	0.00129145	0.00372068	0.0142828
comp2278366_c0_seq5_m.88731	-0.351057	0.0013021	0.00372068	0.0142828
comp2257633_c0_seq1_m.48279	-0.457247	0.00134592	0.00380666	0.0146128
comp2204672_c0_seq1_m.13711	-0.337789	0.00139057	0.00384132	0.0147459
comp2271675_c0_seq2_m.71655	1.08071	0.0014155	0.00384132	0.0147459
comp2251806_c0_seq1_m.40480	-0.333089	0.00142243	0.00384132	0.0147459
comp2269850_c0_seq1_m.68122	0.539307	0.00142327	0.00384132	0.0147459
comp2276440_c0_seq2_m.82383	0.413605	0.00143937	0.00384132	0.0147459
comp2138952_c0_seq1_m.6867	0.621791	0.0014578	0.00384132	0.0147459
comp2275391_c0_seq1_m.79711	-0.630686	0.00149027	0.00384132	0.0147459
comp2257674_c0_seq1_m.48339	1.35334	0.00149272	0.00384132	0.0147459
comp2275241_c0_seq5_m.79383	0.339244	0.00149899	0.00384132	0.0147459
comp2278474_c0_seq1_m.89294	-0.38355	0.00150744	0.00384132	0.0147459
comp2268869_c0_seq6_m.66344	0.859014	0.0015197	0.00384132	0.0147459
comp2266507_c0_seq10_m.62138	-0.56103	0.00152448	0.00384132	0.0147459
comp2254456_c0_seq2_m.43993	0.382037	0.00156509	0.00388252	0.0149041
comp2259363_c0_seq16_m.50888	0.346974	0.00158178	0.00388252	0.0149041
comp2236992_c0_seq1_m.26663	-0.378667	0.00160258	0.00388252	0.0149041
comp2257781_c0_seq1_m.48513	0.406977	0.00161979	0.00388252	0.0149041
comp2244716_c0_seq1_m.32883	0.513832	0.00163116	0.00388252	0.0149041
comp2271916_c0_seq1_m.72122	0.446167	0.00163653	0.00388252	0.0149041
comp2270220_c0_seq1_m.68776	0.505176	0.00164291	0.00388252	0.0149041
comp2264302_c0_seq2_m.58699	-0.602127	0.00166032	0.00388252	0.0149041
comp2276389_c1_seq15_m.82250	-0.337623	0.00167524	0.00388252	0.0149041
comp2277374_c0_seq2_m.85051	0.751772	0.00168091	0.00388252	0.0149041
comp2278509_c0_seq8_m.89637	0.360978	0.00173296	0.00396966	0.0152386
comp2260103_c0_seq1_m.51994	-0.367187	0.001792	0.00404085	0.0155118
gnl_Pdu_trscr_assembly_1_14069_m.67140	-0.375046	0.00179319	0.00404085	0.0155118
comp2253875_c0_seq1_m.43271	0.487449	0.0018362	0.0041044	0.0157558
comp2275445_c0_seq2_m.79869	-0.399695	0.00186433	0.00413394	0.0158692
comp2276593_c0_seq3_m.82791	0.394783	0.0018966	0.00417211	0.0160157
comp2254675_c0_seq1_m.44244	-0.385908	0.00194724	0.00422906	0.0162343
comp2271413_c1_seq5_m.70995	-0.407606	0.001953	0.00422906	0.0162343
comp2271667_c0_seq1_m.71637	0.309512	0.00203201	0.00427916	0.0164267
comp2271871_c0_seq8_m.72023	0.480271	0.00205665	0.00427916	0.0164267
comp2280178_c0_seq1_m.91219	-0.521942	0.00205997	0.00427916	0.0164267
comp2257070_c0_seq2_m.47512	0.749363	0.00206992	0.00427916	0.0164267
comp2238188_c0_seq1_m.27576	-0.668445	0.00207395	0.00427916	0.0164267
comp2263346_c1_seq31_m.57192	-0.401296	0.00209505	0.00427916	0.0164267
comp2271595_c0_seq2_m.71452	0.426928	0.00210723	0.00427916	0.0164267
comp2267634_c0_seq2_m.64174	-0.478195	0.00211636	0.00427916	0.0164267
comp2277605_c1_seq7_m.85828	0.457639	0.00212764	0.00427916	0.0164267
comp2246514_c1_seq1_m.34691	-0.379658	0.00213052	0.00427916	0.0164267
comp2276577_c0_seq8_m.92288	0.901041	0.00219831	0.00438354	0.0168273
comp2268443_c0_seq2_m.65634	0.347783	0.00222973	0.00438945	0.01685
comp2274999_c0_seq4_m.78837	0.458312	0.00224543	0.00438945	0.01685
comp2261379_c0_seq1_m.54133	-0.507171	0.00224878	0.00438945	0.01685
gnl_Pdu_trscr_assembly_1_16061_m.43221	-0.419045	0.00229013	0.00442672	0.0169931
comp2268194_c0_seq1_m.65186	-0.444739	0.00229982	0.00442672	0.0169931
comp2250982_c0_seq1_m.39507	0.330038	0.002331	0.00445579	0.0171047
comp2254167_c0_seq1_m.43587	0.345276	0.0023767	0.00451204	0.0173206
gnl_Pdu_trscr_assembly_1_2589_m.58494	-0.448349	0.00241569	0.00455485	0.017485
comp2278471_c0_seq8_m.89279	0.354815	0.00244598	0.00456704	0.0175318
comp2274581_c1_seq21_m.92631	-0.367255	0.00245511	0.00456704	0.0175318
comp2263822_c0_seq1_m.57945	0.305599	0.00247225	0.00456827	0.0175365
comp2274301_c0_seq6_m.77327	0.608534	0.00249982	0.00458864	0.0176147
gnl_Pdu_trscr_assembly_1_200732_m.91055	-0.674055	0.00253383	0.00462046	0.0177368
comp2265370_c0_seq1_m.60276	-0.280879	0.00263134	0.00476452	0.0182898
comp2274474_c0_seq5_m.77718	-0.644882	0.00264961	0.00476452	0.0182898
comp2224014_c0_seq1_m.19704	-0.357149	0.00266932	0.00476452	0.0182898
comp2273356_c0_seq1_m.75157	0.296094	0.00268159	0.00476452	0.0182898
comp1953077_c0_seq1_m.3483	-0.579589	0.0027634	0.00478116	0.0183537
comp2278306_c0_seq2_m.88465	0.316957	0.00276919	0.00478116	0.0183537
comp2276668_c0_seq1_m.83017	-0.523511	0.00276983	0.00478116	0.0183537
comp2251386_c0_seq2_m.40044	-0.466809	0.00277057	0.00478116	0.0183537
comp1977957_c0_seq1_m.3878	0.525929	0.00279296	0.00478116	0.0183537
comp2265656_c0_seq3_m.60780	0.791107	0.00281156	0.00478116	0.0183537
comp2243933_c0_seq1_m.32211	-0.492499	0.00281171	0.00478116	0.0183537
comp2275107_c0_seq4_m.79080	-0.339089	0.00284934	0.00481561	0.0184859
comp1196959_c0_seq2_m.1014	0.410092	0.00293182	0.00492498	0.0189058
comp2276805_c0_seq8_m.83380	0.600618	0.00299245	0.00493902	0.0189597
comp2274295_c0_seq2_m.77311	0.594493	0.00299281	0.00493902	0.0189597
comp2265049_c0_seq3_m.59764	0.693022	0.00299364	0.00493902	0.0189597
comp2269593_c0_seq3_m.67692	0.322608	0.00311475	0.00510594	0.0196005
comp2281676_c0_seq1_m.91255	0.573055	0.00313165	0.00510594	0.0196005
comp2250201_c0_seq1_m.38525	0.323572	0.00317722	0.00514181	0.0197382
comp1198575_c0_seq1_m.1066	-0.369542	0.00319076	0.00514181	0.0197382
gnl_Pdu_trscr_assembly_1_11607_m.26425	0.571861	0.00326439	0.00523006	0.0200769
comp1194106_c0_seq1_m.742	0.332895	0.00330532	0.00526457	0.0202094
comp2269110_c0_seq3_m.66810	-0.303921	0.00332392	0.00526457	0.0202094
comp2265471_c0_seq5_m.60488	0.37954	0.0033791	0.00532157	0.0204282
comp2273417_c0_seq5_m.75297	-0.511515	0.0033988	0.00532235	0.0204312
comp2278133_c0_seq3_m.87701	0.354975	0.00348028	0.00541933	0.0208035
comp2254520_c0_seq1_m.44059	-0.530838	0.0035419	0.00548446	0.0210535
comp2269698_c0_seq1_m.67864	0.366623	0.00359933	0.00554244	0.0212761
comp2261018_c0_seq2_m.53614	-0.34162	0.0036302	0.00555907	0.0213399
comp2272118_c0_seq11_m.72524	0.510213	0.0036516	0.00556112	0.0213478
comp2276743_c1_seq1_m.83170	0.331028	0.00372405	0.00562458	0.0215914
comp2212572_c0_seq1_m.15390	0.31035	0.00373385	0.00562458	0.0215914
comp1926910_c0_seq1_m.3122	-0.310983	0.00376811	0.00564296	0.021662
comp2275191_c0_seq1_m.79281	0.337588	0.00379695	0.00564296	0.021662
comp2268937_c0_seq1_m.66472	0.484278	0.00380713	0.00564296	0.021662
comp2261183_c0_seq1_m.53867	0.502021	0.00388659	0.00573009	0.0219964
comp2277680_c0_seq25_m.86056	-0.313745	0.00397604	0.00583095	0.0223836
comp2275478_c0_seq7_m.79935	0.385356	0.00399809	0.00583243	0.0223893
comp2254394_c0_seq2_m.43926	-0.348405	0.00402735	0.00583812	0.0224111
comp2272691_c0_seq4_m.73750	0.874205	0.00404411	0.00583812	0.0224111
comp2275853_c0_seq1_m.80817	0.460038	0.00408892	0.00587221	0.022542
comp2242282_c0_seq1_m.30761	-0.358039	0.00418146	0.00595411	0.0228564
comp2279523_c0_seq1_m.91136	-0.380231	0.00418891	0.00595411	0.0228564
comp2263394_c0_seq1_m.57263	0.537843	0.00425886	0.00602266	0.0231195
comp2263508_c0_seq1_m.57408	0.563737	0.00433737	0.00610255	0.0234262
comp2278623_c0_seq6_m.90693	0.427462	0.00438462	0.00613695	0.0235583
comp2226333_c0_seq1_m.20670	-0.283451	0.00440611	0.00613695	0.0235583
comp2277134_c1_seq4_m.84342	0.302812	0.00446519	0.00618374	0.0237379
comp2272254_c0_seq4_m.72822	-0.590611	0.00448431	0.00618374	0.0237379
comp2275191_c1_seq2_m.79282	0.427263	0.00465871	0.00639242	0.0245389
comp2276825_c0_seq1_m.83424	0.374862	0.00480642	0.00656038	0.0251837
comp2274909_c0_seq7_m.78615	1.38765	0.00482845	0.00656038	0.0251837
gnl_Pdu_trscr_assembly_1_15590_m.29311	1.26888	0.00493907	0.00667434	0.0256212
comp2278630_c0_seq8_m.90809	-0.33007	0.00498526	0.00667434	0.0256212
comp2233700_c1_seq1_m.24550	0.780977	0.00502381	0.00667434	0.0256212
comp2275714_c2_seq1_m.80469	-0.462756	0.00504975	0.00667434	0.0256212
comp2276160_c0_seq4_m.81678	-0.441437	0.00507472	0.00667434	0.0256212
comp1194290_c0_seq1_m.781	-0.703064	0.00510126	0.00667434	0.0256212
comp2257070_c0_seq2_m.47513	0.41027	0.00510864	0.00667434	0.0256212
comp2235681_c0_seq1_m.25791	-0.411728	0.00514274	0.00667434	0.0256212
comp2249005_c0_seq2_m.37257	0.280438	0.00516244	0.00667434	0.0256212
comp2272433_c0_seq1_m.73197	0.35549	0.00520835	0.00667434	0.0256212
comp2107035_c0_seq2_m.6021	-0.297849	0.00521245	0.00667434	0.0256212
comp2260649_c0_seq2_m.52797	0.478403	0.00521767	0.00667434	0.0256212
comp2260960_c0_seq2_m.53456	0.839309	0.00524169	0.00667434	0.0256212
comp2253077_c0_seq1_m.42045	0.281145	0.00527266	0.00667434	0.0256212
comp2275893_c0_seq1_m.80933	-0.730284	0.00527353	0.00667434	0.0256212
comp2267341_c0_seq1_m.63653	-0.266426	0.00532064	0.00670336	0.0257326
comp2268473_c1_seq1_m.65668	0.708034	0.00534783	0.00670713	0.025747
comp2276426_c0_seq2_m.82339	-0.380214	0.00538239	0.00672007	0.0257967
comp2278536_c1_seq38_m.89884	0.397887	0.00542237	0.00673962	0.0258718
comp2269627_c0_seq2_m.67749	0.405578	0.005554	0.00686851	0.0263666
comp2261876_c0_seq1_m.54865	0.62553	0.00558159	0.00686851	0.0263666
comp2257487_c0_seq1_m.48064	-0.247014	0.00561587	0.00686851	0.0263666
comp2141997_c0_seq1_m.7386	1.15773	0.0056252	0.00686851	0.0263666
comp2252318_c0_seq1_m.41154	-0.335934	0.0057762	0.00700402	0.0268867
comp2275822_c0_seq10_m.80745	-0.388807	0.00578671	0.00700402	0.0268867
comp2269201_c0_seq1_m.67004	-0.843066	0.00583811	0.0070355	0.0270076
comp2274961_c0_seq5_m.78739	-0.360798	0.00588141	0.00705701	0.0270901
comp2252186_c0_seq3_m.40915	-0.563758	0.00592043	0.0070732	0.0271523
comp2278333_c0_seq10_m.88591	-0.348039	0.00602361	0.00712238	0.0273411
comp2254346_c0_seq1_m.43876	0.816103	0.00602958	0.00712238	0.0273411
comp2202068_c0_seq1_m.13304	-0.259987	0.00603868	0.00712238	0.0273411
comp2277759_c0_seq3_m.86312	0.361152	0.00609481	0.00715812	0.0274783
gnl_Pdu_trscr_assembly_1_1986_m.5698	-0.443609	0.00631735	0.00738818	0.0283614
comp2271225_c0_seq5_m.70641	-0.512782	0.00643681	0.00749626	0.0287763
comp2275933_c0_seq1_m.81045	0.563612	0.00649332	0.00753043	0.0289075
comp2263771_c0_seq2_m.57851	0.308798	0.00664205	0.00764861	0.0293612
comp2277617_c1_seq7_m.85877	-0.294802	0.00665041	0.00764861	0.0293612
comp2271350_c0_seq18_m.70898	0.308513	0.00684045	0.00783466	0.0300754
comp2244437_c0_seq1_m.32653	-0.349247	0.00687895	0.00784634	0.0301202
comp2197446_c0_seq1_m.12404	0.315659	0.0069753	0.00789268	0.0302981
comp2272683_c0_seq1_m.73725	0.236672	0.00697653	0.00789268	0.0302981
comp2254426_c0_seq1_m.43954	-0.409869	0.00702173	0.00790466	0.0303441
comp2265883_c1_seq1_m.61140	0.633973	0.00704416	0.00790466	0.0303441
comp2276314_c0_seq1_m.82075	0.561138	0.00707605	0.00790842	0.0303585
comp2266233_c0_seq1_m.61658	0.76663	0.00714521	0.00795365	0.0305321
comp2280482_c0_seq1_m.91228	-0.365976	0.00722297	0.00798243	0.0306426
comp2264888_c0_seq4_m.59493	0.711656	0.00722866	0.00798243	0.0306426
gi_613484551	0.537143	0.00726485	0.00799056	0.0306738
comp2273519_c1_seq9_m.75533	0.580963	0.00734116	0.00804258	0.0308735
comp2272437_c1_seq1_m.73204	-0.572483	0.00761655	0.00831143	0.0319055
comp2273813_c0_seq2_m.76128	0.320552	0.0076518	0.00831715	0.0319275
comp2269326_c0_seq2_m.67220	-0.265068	0.00775931	0.00835024	0.0320545
comp2270828_c0_seq11_m.69939	-0.404402	0.00777194	0.00835024	0.0320545
comp2258193_c0_seq1_m.49089	-0.250388	0.00777263	0.00835024	0.0320545
comp2234079_c0_seq2_m.24745	0.355619	0.00785192	0.00840286	0.0322565
comp2277982_c0_seq2_m.87136	0.325004	0.00790844	0.0084308	0.0323638
comp2277313_c0_seq3_m.84866	0.511248	0.00795271	0.0084455	0.0324202
comp2262441_c0_seq1_m.55760	-0.3021	0.00804082	0.00850648	0.0326543
comp2272920_c0_seq1_m.74280	0.407988	0.00809163	0.00852218	0.0327146
comp2264022_c0_seq13_m.58310	0.353768	0.00811715	0.00852218	0.0327146
comp2263250_c0_seq1_m.57052	-0.361033	0.00817026	0.00853729	0.0327726
comp2277933_c1_seq7_m.86946	0.289614	0.00819315	0.00853729	0.0327726
comp2270148_c0_seq3_m.68661	-0.227394	0.00858795	0.00891516	0.0342231
comp2279450_c0_seq1_m.91124	0.341361	0.00867377	0.00897066	0.0344362
comp2275625_c0_seq11_m.80264	-0.56568	0.00885194	0.00912089	0.0350129
comp2278363_c0_seq7_m.88713	-0.269459	0.00914489	0.00936435	0.0359475
comp2272842_c0_seq2_m.74081	-0.56058	0.00919575	0.00936435	0.0359475
comp2277945_c0_seq2_m.86985	0.539995	0.0092926	0.00936435	0.0359475
comp2270085_c0_seq9_m.68531	0.356001	0.00936197	0.00936435	0.0359475
comp2263983_c0_seq1_m.58208	0.238467	0.00937684	0.00936435	0.0359475
comp2261395_c0_seq1_m.54150	0.632351	0.00937859	0.00936435	0.0359475
comp2275769_c0_seq3_m.80583	0.293312	0.00941891	0.00936435	0.0359475
comp2273017_c0_seq1_m.74484	-0.242824	0.00942239	0.00936435	0.0359475
comp2275674_c1_seq1_m.80370	-0.647748	0.00942909	0.00936435	0.0359475
comp2274909_c0_seq7_m.78613	1.29738	0.00944805	0.00936435	0.0359475
comp2256245_c0_seq1_m.46340	-0.337454	0.00949652	0.00936435	0.0359475
comp2276413_c0_seq21_m.82313	-0.29133	0.00950468	0.00936435	0.0359475
gnl_Pdu_trscr_assembly_1_17807_m.62055	0.260359	0.00952743	0.00936435	0.0359475
comp2273778_c1_seq23_m.76059	0.558005	0.00961476	0.00941679	0.0361488
comp2247176_c0_seq3_m.35337	-0.297755	0.0101179	0.00987471	0.0379066
comp2275406_c1_seq7_m.79751	0.257176	0.0101755	0.00989601	0.0379884
comp2271535_c0_seq1_m.71319	0.285296	0.0102489	0.00992922	0.0381159
comp2236614_c0_seq1_m.26450	0.335449	0.0102813	0.00992922	0.0381159
comp2270905_c1_seq5_m.70069	-0.370951	0.0103573	0.0099647	0.0382521
comp2246119_c0_seq1_m.34306	0.334328	0.0104262	0.0099647	0.0382521
comp2275616_c0_seq2_m.80253	0.38983	0.0104409	0.0099647	0.0382521
comp2264855_c0_seq1_m.59451	-0.270612	0.0104745	0.0099647	0.0382521
comp2274043_c0_seq7_m.76739	-0.396467	0.0105294	0.0099647	0.0382521
comp2276743_c0_seq1_m.83169	0.32786	0.0105337	0.0099647	0.0382521
comp2222959_c0_seq1_m.19328	-0.617336	0.0106407	0.00999827	0.0383809
comp2271307_c0_seq1_m.70799	-0.382025	0.0106413	0.00999827	0.0383809
comp2271594_c0_seq8_m.71451	-0.563165	0.0107001	0.0100196	0.0384627
comp2270385_c0_seq11_m.69105	0.452702	0.0108808	0.0101414	0.0389305
comp2259349_c0_seq2_m.50877	-0.449523	0.0109035	0.0101414	0.0389305
comp2265077_c0_seq1_m.59810	-0.222493	0.0110981	0.010288	0.039493
comp2266680_c0_seq1_m.62479	-0.281397	0.0111896	0.0103064	0.0395639
comp1194322_c0_seq2_m.793	0.255557	0.0111924	0.0103064	0.0395639
comp2279297_c0_seq1_m.91091	0.21892	0.0112339	0.0103104	0.039579
comp2277995_c0_seq1_m.87177	0.429744	0.0113005	0.0103232	0.0396283
comp2274242_c0_seq2_m.77187	-0.247451	0.0113224	0.0103232	0.0396283
comp2271637_c0_seq1_m.71562	0.404411	0.0114355	0.0103921	0.0398929
comp2272863_c1_seq5_m.74143	-0.251355	0.0114829	0.0104011	0.0399275
comp2228430_c0_seq1_m.21640	0.34577	0.0116104	0.0104824	0.0402394
comp2271944_c0_seq11_m.72172	0.440192	0.011738	0.0105632	0.0405495
comp2261150_c0_seq1_m.53829	0.443998	0.0117774	0.0105643	0.0405539
comp2272233_c0_seq1_m.72760	-0.247236	0.0119583	0.010692	0.0410438
comp2262317_c0_seq2_m.55577	0.36369	0.0121515	0.0108298	0.041573
comp2266500_c0_seq1_m.62123	-0.368458	0.0124211	0.0110346	0.0423591
comp2273599_c0_seq7_m.75677	0.361456	0.0125005	0.0110546	0.0424361
comp2279272_c0_seq1_m.91086	0.262307	0.0125234	0.0110546	0.0424361
comp2270845_c1_seq1_m.69967	0.320265	0.012649	0.0110663	0.0424809
comp2252059_c0_seq1_m.40786	0.283337	0.0126601	0.0110663	0.0424809
gnl_Pdu_trscr_assembly_1_3048_m.12984	0.308456	0.0126962	0.0110663	0.0424809
comp2260797_c0_seq1_m.53088	-0.247593	0.0126964	0.0110663	0.0424809
comp2250906_c0_seq2_m.39444	-0.285634	0.0127487	0.0110771	0.0425222
comp2274517_c0_seq1_m.77807	0.251889	0.0129497	0.0112166	0.0430576
comp2214845_c0_seq1_m.16111	0.329395	0.0131077	0.0113181	0.0434473
comp2269906_c0_seq2_m.68214	-0.361499	0.0131921	0.0113385	0.0435258
comp1199432_c0_seq1_m.1095	-0.377456	0.0132132	0.0113385	0.0435258
comp2265897_c0_seq5_m.61166	0.23365	0.0136277	0.0116581	0.0447527
comp2272435_c0_seq2_m.73201	0.829708	0.014153	0.0120703	0.0463349
comp2276968_c0_seq3_m.83862	0.348407	0.0143382	0.0121907	0.046797
comp2274446_c0_seq19_m.77642	-0.229983	0.0144747	0.0122691	0.047098
comp2273216_c0_seq3_m.74900	0.206015	0.0147921	0.012488	0.0479385
comp2132126_c0_seq4_m.6558	0.406615	0.0148231	0.012488	0.0479385
comp2278276_c0_seq16_m.88350	0.366318	0.0152053	0.0127712	0.0490257
comp2273142_c0_seq1_m.74744	-0.397484	0.0153227	0.0128094	0.0491722
comp2273257_c0_seq9_m.74986	0.535222	0.0153751	0.0128094	0.0491722
comp2272299_c0_seq11_m.72914	-0.385532	0.0154134	0.0128094	0.0491722
comp2271425_c0_seq4_m.71034	-0.20483	0.0154356	0.0128094	0.0491722
comp2275358_c0_seq1_m.79627	-0.259814	0.0156337	0.012935	0.0496544
comp2246502_c0_seq1_m.34680	-0.305929	0.0158475	0.0130082	0.0499352
comp2265328_c0_seq2_m.60206	-0.273589	0.0158585	0.0130082	0.0499352
gnl_Pdu_trscr_assembly_1_7964_m.49648	0.274199	0.0158892	0.0130082	0.0499352
comp2269793_c0_seq1_m.68039	0.264364	0.0159592	0.0130082	0.0499352
comp2269345_c0_seq1_m.67253	0.312689	0.0160001	0.0130082	0.0499352
comp2271906_c0_seq1_m.72107	0.398082	0.0160037	0.0130082	0.0499352
comp2265703_c0_seq1_m.60844	-0.425113	0.0162316	0.0131549	0.0504985
comp2273765_c1_seq6_m.76032	0.694946	0.0164628	0.0133033	0.0510682
comp2279615_c0_seq1_m.91158	-0.207355	0.0166807	0.0134402	0.0515938
comp2272319_c0_seq24_m.72950	0.231174	0.0168072	0.0134915	0.0517907
comp2234282_c0_seq1_m.24908	0.299973	0.0168417	0.0134915	0.0517907
gnl_Pdu_trscr_assembly_1_200732_m.91056	-0.541471	0.0170341	0.0136063	0.0522314
comp2262720_c0_seq1_m.56199	0.351825	0.0172229	0.0136794	0.0525118
comp2269023_c0_seq1_m.66650	0.202099	0.0172344	0.0136794	0.0525118
comp2270472_c0_seq1_m.69272	0.228744	0.0172807	0.0136794	0.0525118
comp2276040_c1_seq5_m.81315	0.244505	0.0173445	0.0136794	0.0525118
comp1785956_c0_seq1_m.2259	0.413174	0.0175442	0.0136794	0.0525118
comp2277142_c0_seq6_m.84365	0.465896	0.0175486	0.0136794	0.0525118
comp2276528_c1_seq4_m.82615	0.869547	0.0175524	0.0136794	0.0525118
comp2267483_c0_seq3_m.63903	-0.325915	0.0175794	0.0136794	0.0525118
gnl_Pdu_trscr_assembly_1_7274_m.39240	0.843525	0.0177371	0.0136794	0.0525118
comp2279235_c0_seq1_m.91078	-0.333597	0.0177371	0.0136794	0.0525118
comp2270119_c0_seq15_m.68605	0.254902	0.0177602	0.0136794	0.0525118
comp2272882_c0_seq14_m.74184	-0.565694	0.0177623	0.0136794	0.0525118
comp2261362_c0_seq2_m.54116	0.826901	0.0177671	0.0136794	0.0525118
comp2279340_c0_seq1_m.91103	0.713648	0.0178649	0.0137166	0.0526546
comp2257282_c0_seq1_m.47769	-0.248969	0.0181201	0.013874	0.0532591
comp2277352_c0_seq3_m.84974	0.183857	0.0182203	0.0138958	0.0533426
comp2273576_c0_seq1_m.75622	0.330853	0.0182488	0.0138958	0.0533426
comp2254376_c0_seq1_m.43911	0.281501	0.0183686	0.0139213	0.0534406
comp2273193_c0_seq1_m.74830	-0.453509	0.0183827	0.0139213	0.0534406
comp2231610_c0_seq1_m.23229	0.25238	0.0185388	0.0140013	0.0537475
comp2235922_c0_seq1_m.25983	-0.296987	0.018604	0.0140123	0.0537899
comp2273628_c0_seq6_m.75728	-0.349408	0.0189139	0.0141765	0.0544203
comp2263691_c0_seq2_m.57661	-0.316655	0.0189243	0.0141765	0.0544203
comp1335339_c0_seq2_m.1954	0.236527	0.0189951	0.0141912	0.0544764
comp2258437_c0_seq2_m.49437	0.351147	0.0192912	0.0143737	0.0551771
comp2275759_c0_seq17_m.80560	-0.183459	0.0193597	0.014386	0.0552244
comp2278062_c0_seq4_m.87412	0.245046	0.0194264	0.014397	0.0552666
comp2276442_c0_seq1_m.82386	-0.214672	0.0196832	0.0145484	0.0558477
comp2245511_c0_seq1_m.33658	-0.358027	0.0197648	0.0145699	0.0559302
comp2214888_c0_seq1_m.16124	0.21451	0.0200094	0.014711	0.056472
comp2272961_c0_seq1_m.74370	0.220293	0.0202475	0.0148425	0.0569769
comp2248808_c0_seq2_m.37043	-0.674373	0.0202953	0.0148425	0.0569769
comp2277722_c0_seq17_m.86189	-0.245065	0.0204002	0.01488	0.0571206
gnl_Pdu_trscr_assembly_1_1213_m.70099	-0.239255	0.0205313	0.0149281	0.0573053
comp2279213_c0_seq1_m.91075	-0.242573	0.0205739	0.0149281	0.0573053
comp2278238_c0_seq6_m.88188	0.259893	0.0207539	0.0150194	0.0576558
comp2268978_c0_seq1_m.66540	0.764358	0.0208135	0.0150233	0.0576708
comp2257975_c0_seq1_m.48752	0.213497	0.0209985	0.0151175	0.0580323
comp1226347_c0_seq1_m.1231	0.191621	0.0213675	0.0153432	0.0588989
comp2275266_c0_seq21_m.79421	-0.241772	0.0214808	0.0153848	0.0590584
comp2266439_c0_seq1_m.62025	0.34933	0.0215451	0.015391	0.0590823
comp2272182_c0_seq2_m.72649	0.337235	0.0217399	0.0154902	0.0594633
comp2265589_c0_seq2_m.60673	-0.222997	0.0218045	0.0154964	0.0594871
comp2198016_c0_seq1_m.12499	0.21093	0.0219178	0.0155371	0.0596433
comp2273249_c0_seq4_m.74967	-0.351166	0.0220194	0.0155476	0.0596833
comp2211270_c0_seq1_m.14951	0.378021	0.0220731	0.0155476	0.0596833
comp2276804_c0_seq1_m.83376	-0.52054	0.0221008	0.0155476	0.0596833
comp2278076_c0_seq2_m.87463	0.285003	0.0222479	0.015583	0.0598194
gnl_Pdu_trscr_assembly_1_4228_m.63259	-0.449508	0.0222894	0.015583	0.0598194
gnl_Pdu_trscr_assembly_1_1797_m.38383	0.240262	0.0223198	0.015583	0.0598194
comp2270996_c0_seq5_m.70236	0.537467	0.0237103	0.0165122	0.0633863
comp2280591_c0_seq1_m.91233	0.59007	0.0239389	0.016621	0.0638039
comp2278485_c0_seq1_m.89371	0.362652	0.0240425	0.016621	0.0638039
comp2272698_c0_seq4_m.73763	0.184885	0.0240464	0.016621	0.0638039
comp2276202_c0_seq3_m.81780	0.3452	0.0242833	0.016743	0.0642722
comp2262360_c0_seq1_m.55644	-0.547434	0.0243999	0.0167816	0.0644205
comp2268892_c0_seq1_m.66381	-0.479318	0.0248126	0.0170232	0.0653481
comp2256216_c0_seq9_m.46312	0.403054	0.0250955	0.017136	0.0657811
comp2276936_c0_seq3_m.83786	0.306337	0.0251007	0.017136	0.0657811
gnl_Pdu_trscr_assembly_1_9334_m.28552	0.227712	0.0253409	0.0172374	0.0661702
comp2269773_c0_seq6_m.68002	0.173749	0.0253735	0.0172374	0.0661702
comp2273385_c0_seq1_m.75218	0.318642	0.0258873	0.0175434	0.067345
comp2276719_c0_seq5_m.83124	-0.366915	0.0261449	0.0176748	0.0678493
comp2234809_c0_seq1_m.25266	-0.192514	0.0269336	0.0181637	0.0697259
comp2277176_c0_seq2_m.84466	0.238686	0.027431	0.0184542	0.0708413
comp2274413_c0_seq1_m.77564	0.489032	0.0275302	0.0184761	0.0709251
comp2276166_c0_seq8_m.81705	0.398685	0.0277201	0.0185309	0.0711357
comp2274259_c0_seq1_m.77220	0.337986	0.0277456	0.0185309	0.0711357
comp2258527_c0_seq1_m.49534	0.192405	0.0279083	0.0185948	0.0713807
comp2277505_c0_seq1_m.85479	0.184716	0.0283709	0.0187507	0.0719795
comp2277243_c1_seq3_m.84671	0.226649	0.0283888	0.0187507	0.0719795
comp2264971_c0_seq5_m.59605	0.200868	0.0284215	0.0187507	0.0719795
comp1234630_c0_seq1_m.1254	-0.27137	0.028433	0.0187507	0.0719795
comp2265464_c0_seq1_m.60472	-0.407372	0.0284806	0.0187507	0.0719795
comp1961272_c0_seq1_m.3584	0.410691	0.028937	0.0190061	0.0729597
comp2277075_c0_seq2_m.84155	0.223019	0.0292996	0.0191694	0.0735868
gnl_Pdu_trscr_assembly_1_3867_m.65412	1.12072	0.0293241	0.0191694	0.0735868
comp2272495_c0_seq1_m.73308	0.440093	0.029435	0.0191967	0.0736913
comp2275153_c0_seq1_m.79199	0.190579	0.0298841	0.0194438	0.0746401
comp2257601_c0_seq2_m.48241	-0.204326	0.0300373	0.0194977	0.074847
comp2277740_c0_seq2_m.86258	-0.302257	0.030656	0.0198275	0.0761128
comp2261603_c1_seq1_m.54400	-0.244632	0.0306883	0.0198275	0.0761128
comp2269915_c0_seq3_m.68230	0.213862	0.030872	0.0198997	0.0763902
comp2271783_c0_seq2_m.71842	-0.180627	0.0314605	0.020232	0.0776659
comp2267718_c0_seq1_m.64309	0.20789	0.0316707	0.02032	0.0780036
comp2275167_c0_seq1_m.79227	0.191419	0.0327361	0.0209551	0.0804416
comp2271649_c0_seq1_m.71599	-0.307198	0.0329288	0.0210299	0.0807286
comp2271419_c1_seq1_m.71009	0.561425	0.0334817	0.0213339	0.0818955
comp2278554_c0_seq4_m.90013	-0.252827	0.033657	0.0213964	0.0821355
comp2262638_c0_seq1_m.56073	-0.193824	0.0337569	0.0214108	0.0821907
comp2276031_c0_seq51_m.81296	0.39121	0.0339546	0.0214821	0.0824647
comp2248791_c1_seq1_m.37027	0.250357	0.0340924	0.0214821	0.0824647
comp2260058_c0_seq1_m.51934	-0.316648	0.0341123	0.0214821	0.0824647
comp2269171_c0_seq3_m.66933	0.396475	0.0341794	0.0214821	0.0824647
comp2272641_c0_seq2_m.73619	0.172475	0.0346414	0.0217232	0.0833903
comp2139380_c0_seq1_m.6935	0.360848	0.0348165	0.0217837	0.0836224
comp2271244_c0_seq1_m.70676	0.264316	0.0354191	0.0221108	0.0848782
comp2265255_c2_seq1_m.60100	0.420011	0.0356474	0.0222033	0.0852332
comp2237757_c0_seq1_m.27251	0.177034	0.0359062	0.0222983	0.0855977
comp2275508_c1_seq3_m.80009	-0.431889	0.0359801	0.0222983	0.0855977
comp2264796_c2_seq1_m.59361	-0.225969	0.0360693	0.0222983	0.0855977
comp2201786_c0_seq1_m.13247	0.613252	0.0361227	0.0222983	0.0855977
comp2268336_c0_seq2_m.65472	-0.173162	0.036202	0.0222983	0.0855977
comp2256558_c1_seq1_m.46706	-0.298599	0.0365958	0.0224909	0.0863369
comp2231997_c0_seq1_m.23466	0.209666	0.0367775	0.0225525	0.0865735
comp2271994_c0_seq2_m.72269	-0.236514	0.0369732	0.0226224	0.086842
comp2278362_c0_seq1_m.88712	-0.199338	0.0373897	0.0227887	0.0874802
comp2278470_c0_seq2_m.89275	0.568781	0.0374093	0.0227887	0.0874802
comp2271526_c0_seq3_m.71285	-0.350992	0.0377104	0.0229217	0.087991
comp2266005_c0_seq5_m.61322	0.503558	0.0381888	0.0231617	0.0889123
comp2278605_c1_seq8_m.90480	0.253657	0.0385415	0.0233246	0.0895374
comp2278308_c1_seq12_m.88483	0.188095	0.0386351	0.0233303	0.0895594
comp2278405_c0_seq22_m.88893	0.249467	0.039213	0.0236278	0.0907015
comp2260519_c0_seq10_m.52611	-0.249577	0.0393006	0.0236292	0.0907068
comp2258349_c0_seq1_m.49322	-0.284999	0.039625	0.0237727	0.0912575
comp2278161_c0_seq3_m.87805	0.203147	0.0400175	0.0239563	0.0919625
comp2277956_c0_seq3_m.87021	0.169871	0.0405115	0.0241843	0.0928378
comp2262740_c0_seq13_m.56232	0.17838	0.0406316	0.0241843	0.0928378
comp2269060_c1_seq1_m.66719	-0.380219	0.0406602	0.0241843	0.0928378
comp2274713_c1_seq7_m.78178	0.238244	0.040905	0.0242356	0.0930345
comp2274888_c0_seq2_m.78557	0.253373	0.0409212	0.0242356	0.0930345
comp2278012_c0_seq11_m.87235	0.166729	0.0411106	0.0242959	0.0932659
gnl_Pdu_trscr_assembly_1_19681_m.92605	0.281385	0.0413662	0.0243584	0.0935058
comp2248291_c0_seq1_m.36455	-0.194441	0.0413921	0.0243584	0.0935058
comp2272491_c1_seq4_m.73302	-0.202009	0.0415203	0.024382	0.0935965
comp2254418_c0_seq1_m.43945	-0.196375	0.0422156	0.0247379	0.0949627
comp2262185_c0_seq1_m.55318	0.812747	0.0425388	0.0248747	0.095488
comp2265462_c0_seq5_m.60462	-0.203872	0.0430789	0.0251375	0.0964967
comp2275905_c0_seq4_m.80965	-0.170219	0.0435557	0.0253623	0.0973598
comp2263768_c0_seq2_m.57843	-0.269584	0.0437145	0.0254014	0.0975098
comp2252912_c0_seq2_m.41849	0.168978	0.0439363	0.0254769	0.0977996

## Sheet: IM_NM vs PM_NM_Male
	logFC	p.mod	q.mod	adjusted.pvalue
comp2229729_c0_seq1|m.22264	0.986611	1.38e-06	0.000452118	0.00146506
comp2266507_c0_seq10|m.62138	-0.660684	2.29e-05	0.00276241	0.00895142
comp2267732_c0_seq2|m.64331	-0.632913	2.83e-05	0.00276241	0.00895142
comp2257395_c0_seq4|m.47951	1.26106	5.07e-05	0.00276241	0.00895142
comp2271737_c1_seq2|m.71770	-0.725924	6.17e-05	0.00276241	0.00895142
gnl_Pdu_trscr_assembly_1|998;|m.15062	-0.634874	7.26e-05	0.00276241	0.00895142
gnl_Pdu_trscr_assembly_1|16296;|m.13041	-0.649054	7.39e-05	0.00276241	0.00895142
comp2274295_c0_seq2|m.77311	0.617197	9.03e-05	0.00276241	0.00895142
comp2269185_c0_seq2|m.66963	-0.564789	9.95e-05	0.00276241	0.00895142
comp2252285_c0_seq2|m.41107	-0.457545	0.000112241	0.00276241	0.00895142
comp2232909_c0_seq1|m.24034	1.45118	0.000115835	0.00276241	0.00895142
comp2263115_c0_seq2|m.56831	0.662213	0.000118966	0.00276241	0.00895142
comp2254520_c0_seq1|m.44059	-0.62165	0.000124736	0.00276241	0.00895142
comp1244797_c0_seq1|m.1278	0.431815	0.000127505	0.00276241	0.00895142
comp2277947_c0_seq1|m.86990	-0.463648	0.000128236	0.00276241	0.00895142
comp2264838_c0_seq3|m.59436	-1.37023	0.000134608	0.00276241	0.00895142
comp2273926_c0_seq5|m.76421	1.2428	0.000152545	0.00280925	0.0091032
comp2257905_c0_seq1|m.48664	-0.692163	0.000159887	0.00280925	0.0091032
comp2277416_c0_seq3|m.85174	0.638998	0.000162557	0.00280925	0.0091032
comp2279567_c0_seq1|m.91146	0.674107	0.000199382	0.00311038	0.010079
gnl_Pdu_trscr_assembly_1|7327;|m.81715	-0.644216	0.000211845	0.00311038	0.010079
comp2237468_c0_seq1|m.27022	-1.34251	0.000215982	0.00311038	0.010079
comp2269321_c1_seq1|m.67212	-0.546775	0.000225411	0.00311038	0.010079
gnl_Pdu_trscr_assembly_1|3048;|m.12984	0.526028	0.000234121	0.00311038	0.010079
comp2271526_c0_seq3|m.71285	-0.585468	0.000236819	0.00311038	0.010079
comp2270279_c0_seq7|m.68904	-0.51237	0.000269741	0.00340653	0.0110386
comp2269158_c0_seq1|m.66914	0.445687	0.000290923	0.00353796	0.0114645
comp2276936_c0_seq3|m.83786	0.477551	0.000316321	0.00358435	0.0116148
comp2287273_c0_seq1_contamination|m.91384	0.414891	0.000322473	0.00358435	0.0116148
comp1958245_c0_seq1|m.3536	-0.38189	0.000327502	0.00358435	0.0116148
comp2277680_c0_seq25|m.86056	-0.392094	0.000338402	0.00358435	0.0116148
comp2248821_c1_seq2|m.37050	-0.424232	0.000390499	0.00373088	0.0120897
comp2247988_c0_seq1|m.36173	-0.608969	0.000400096	0.00373088	0.0120897
gnl_Pdu_trscr_assembly_1|14638;|m.60097	-0.633208	0.000418938	0.00373088	0.0120897
comp2254675_c0_seq1|m.44244	-0.375166	0.000438111	0.00373088	0.0120897
comp2275893_c0_seq1|m.80933	-0.873438	0.000449209	0.00373088	0.0120897
comp2269627_c0_seq2|m.67749	0.483594	0.000457481	0.00373088	0.0120897
comp2259221_c0_seq1|m.50687	0.425187	0.000466925	0.00373088	0.0120897
comp2278366_c0_seq5|m.88731	-0.442199	0.000474639	0.00373088	0.0120897
comp2253856_c0_seq1|m.43254	-0.459703	0.000475223	0.00373088	0.0120897
comp2275241_c0_seq5|m.79383	0.460079	0.000476067	0.00373088	0.0120897
comp2204754_c0_seq1|m.13720	0.59889	0.000483197	0.00373088	0.0120897
comp2272547_c0_seq4|m.73421	-0.431333	0.000500513	0.00373088	0.0120897
comp2270876_c0_seq2|m.70018	-0.473638	0.000509397	0.00373088	0.0120897
comp2249005_c0_seq2|m.37257	0.390921	0.000524012	0.00373088	0.0120897
comp2264022_c0_seq13|m.58310	0.549193	0.000540558	0.00373088	0.0120897
comp2189372_c0_seq1|m.11219	-0.512655	0.00054062	0.00373088	0.0120897
comp2276035_c1_seq16|m.81307	-0.620399	0.000545399	0.00373088	0.0120897
comp2279213_c0_seq1|m.91075	-0.36121	0.000562	0.00376599	0.0122034
gnl_Pdu_trscr_assembly_1|200732;|m.91055	-0.764274	0.000599207	0.00383211	0.0124177
comp2268937_c0_seq1|m.66472	0.441685	0.000603564	0.00383211	0.0124177
comp2226643_c0_seq1|m.20830	-0.414016	0.000606879	0.00383211	0.0124177
comp2276389_c1_seq15|m.82250	-0.350332	0.000625424	0.00387469	0.0125557
comp2275841_c0_seq1|m.80783	-0.587932	0.000645081	0.00391939	0.0127005
comp2257939_c0_seq1|m.48703	-0.511407	0.000656513	0.00391939	0.0127005
gnl_Pdu_trscr_assembly_1|1514;|m.69841	0.594209	0.000708306	0.00413246	0.013391
comp2272691_c0_seq4|m.73750	0.836987	0.000717373	0.00413246	0.013391
comp2254641_c1_seq1|m.44200	-0.376253	0.00073495	0.00416071	0.0134825
comp2257633_c0_seq1|m.48279	-0.425356	0.000752442	0.00418755	0.0135695
comp1926910_c0_seq1|m.3122	-0.358385	0.000806673	0.00441453	0.014305
comp2278474_c0_seq1|m.89294	-0.408094	0.00085122	0.00454029	0.0147125
comp2275523_c0_seq29|m.80039	0.565635	0.000890791	0.00454029	0.0147125
comp2225664_c0_seq1|m.20382	0.465667	0.000903446	0.00454029	0.0147125
comp2274278_c0_seq6|m.77267	-0.502795	0.00090425	0.00454029	0.0147125
comp2269850_c0_seq1|m.68122	0.572223	0.000906453	0.00454029	0.0147125
comp2266701_c0_seq3|m.62512	0.618939	0.000912618	0.00454029	0.0147125
comp2208474_c0_seq1|m.14351	-0.556271	0.000938202	0.00454158	0.0147167
comp2266692_c0_seq1|m.62504	0.578352	0.000945175	0.00454158	0.0147167
comp2263346_c1_seq31|m.57192	-0.42232	0.000970099	0.00454158	0.0147167
comp2269987_c0_seq2|m.68354	0.50767	0.000981974	0.00454158	0.0147167
comp2272437_c1_seq1|m.73204	-0.682977	0.00100394	0.00454158	0.0147167
comp2265656_c0_seq3|m.60780	0.502616	0.00101612	0.00454158	0.0147167
comp2281676_c0_seq1|m.91255	0.830628	0.00102246	0.00454158	0.0147167
comp2279523_c0_seq1|m.91136	-0.425091	0.00103026	0.00454158	0.0147167
gnl_Pdu_trscr_assembly_1|15590;|m.29311	1.27056	0.00103736	0.00454158	0.0147167
comp2245014_c0_seq2|m.33157	-0.593717	0.00105946	0.0045773	0.0148324
comp2275107_c0_seq4|m.79080	-0.29529	0.00119797	0.00507819	0.0164556
comp2269611_c0_seq1|m.67728	0.472445	0.00120633	0.00507819	0.0164556
comp2268340_c1_seq1|m.65478	0.482527	0.00123518	0.00510359	0.0165379
comp1198575_c0_seq1|m.1066	-0.402112	0.00124345	0.00510359	0.0165379
comp2260103_c0_seq1|m.51994	-0.373777	0.00129477	0.00524862	0.0170078
comp2278077_c0_seq3|m.87468	0.539104	0.00131743	0.00527535	0.0170944
comp2273599_c0_seq7|m.75677	0.363266	0.00134514	0.00531607	0.0172264
comp2261018_c0_seq2|m.53614	-0.404066	0.00135998	0.00531607	0.0172264
comp2274909_c0_seq7|m.78613	1.40225	0.00138667	0.00535661	0.0173577
comp1953876_c0_seq1|m.3493	0.536566	0.00140954	0.00535661	0.0173577
comp2263250_c0_seq1|m.57052	-0.352876	0.00143137	0.00535661	0.0173577
comp2253875_c0_seq1|m.43271	0.517636	0.0014356	0.00535661	0.0173577
comp2257585_c0_seq1|m.48216	0.614314	0.00145613	0.00537216	0.0174081
comp2224448_c0_seq1|m.19874	-0.353639	0.00159262	0.00581044	0.0188283
comp2267571_c0_seq4|m.64058	-0.547163	0.00164069	0.00592002	0.0191834
comp2275391_c0_seq1|m.79711	-0.566048	0.00168561	0.00594453	0.0192629
comp2270404_c0_seq3|m.69137	-0.606656	0.00169136	0.00594453	0.0192629
comp2203251_c0_seq1|m.13504	0.365766	0.00170179	0.00594453	0.0192629
comp2274909_c0_seq7|m.78615	1.38998	0.00178681	0.00612744	0.0198556
comp2274242_c0_seq2|m.77187	-0.333345	0.00179148	0.00612744	0.0198556
comp2198016_c0_seq1|m.12499	0.301892	0.00189328	0.00640885	0.0207675
comp2267172_c0_seq1|m.63318	0.483115	0.00195483	0.00654971	0.0212239
comp2276668_c0_seq1|m.83017	-0.569527	0.00201535	0.00668426	0.0216599
comp2268798_c0_seq2|m.66233	0.460827	0.00206455	0.00671663	0.0217648
comp2265768_c0_seq2|m.60943	-0.661994	0.00207318	0.00671663	0.0217648
comp2278010_c1_seq9|m.87231	-0.635642	0.00210066	0.00671663	0.0217648
comp2277933_c1_seq7|m.86946	0.29614	0.00210693	0.00671663	0.0217648
comp1197507_c0_seq1|m.1032	-0.28098	0.00216698	0.00681073	0.0220697
comp2252847_c0_seq1|m.41763	0.350152	0.00217793	0.00681073	0.0220697
comp2276577_c0_seq8|m.92288	0.836946	0.00222816	0.00686319	0.0222397
comp2277908_c1_seq11|m.86865	0.392091	0.00223651	0.00686319	0.0222397
comp2274787_c0_seq1|m.78332	-0.329385	0.00227095	0.00690433	0.022373
comp1916779_c0_seq1|m.2944	-0.318157	0.00231315	0.00695458	0.0225358
comp2280591_c0_seq1|m.91233	1.01766	0.00234624	0.00695458	0.0225358
comp1335339_c0_seq2|m.1954	0.404257	0.00235101	0.00695458	0.0225358
comp2259363_c0_seq16|m.50888	0.307141	0.00240036	0.00698285	0.0226275
comp1194294_c0_seq1|m.785	0.346049	0.00241561	0.00698285	0.0226275
comp2277995_c0_seq1|m.87177	0.320244	0.00242437	0.00698285	0.0226275
comp2274413_c0_seq1|m.77564	0.603637	0.00251166	0.00704761	0.0228373
comp2268115_c0_seq2|m.65034	-0.466558	0.00252272	0.00704761	0.0228373
comp2273141_c0_seq2|m.74737	0.350954	0.00253179	0.00704761	0.0228373
comp2270220_c0_seq1|m.68776	0.490282	0.00253271	0.00704761	0.0228373
comp2258609_c0_seq1|m.49647	0.35803	0.00256612	0.00708057	0.0229441
comp2278471_c0_seq8|m.89279	0.323054	0.00271476	0.00742829	0.0240709
comp2278630_c0_seq8|m.90809	-0.358321	0.00274431	0.00744709	0.0241318
comp1953077_c0_seq1|m.3483	-0.5597	0.00284969	0.0076045	0.0246419
comp2275191_c0_seq1|m.79281	0.330018	0.00285802	0.0076045	0.0246419
gnl_Pdu_trscr_assembly_1|12794;|m.61443	0.768733	0.00288324	0.0076045	0.0246419
comp2254346_c0_seq1|m.43876	0.873963	0.00292445	0.0076045	0.0246419
comp1199432_c0_seq1|m.1095	-0.413036	0.00293712	0.0076045	0.0246419
comp2265049_c0_seq3|m.59764	0.789349	0.00294128	0.0076045	0.0246419
comp2270576_c0_seq1|m.69463	0.601958	0.00298357	0.00760555	0.0246453
comp2275674_c1_seq1|m.80370	-0.710398	0.00303239	0.00760555	0.0246453
comp2266680_c0_seq1|m.62479	-0.37095	0.00303882	0.00760555	0.0246453
comp2260394_c0_seq1|m.52394	-0.371281	0.00305958	0.00760555	0.0246453
comp2276151_c0_seq3|m.81648	0.387645	0.00306271	0.00760555	0.0246453
comp2275701_c1_seq1|m.80440	0.746322	0.00309137	0.00760555	0.0246453
comp2273257_c0_seq9|m.74986	0.653821	0.00310382	0.00760555	0.0246453
comp2244716_c0_seq1|m.32883	0.429875	0.00318552	0.00774793	0.0251067
comp2250201_c0_seq1|m.38525	0.278138	0.00323073	0.00775846	0.0251408
comp2270905_c1_seq5|m.70069	-0.334534	0.00323711	0.00775846	0.0251408
comp2274474_c0_seq5|m.77718	-0.634132	0.00335568	0.00796472	0.0258091
comp2141997_c0_seq1|m.7386	0.991931	0.00337168	0.00796472	0.0258091
comp2279536_c0_seq1|m.91140	-0.329933	0.00340088	0.00797631	0.0258467
comp2265897_c0_seq5|m.61166	0.287436	0.00350583	0.00816414	0.0264553
comp2269814_c0_seq1|m.68069	0.392402	0.00357096	0.00821972	0.0266355
comp2262731_c0_seq1|m.56213	0.546151	0.00359296	0.00821972	0.0266355
comp2272233_c0_seq1|m.72760	-0.289446	0.0036048	0.00821972	0.0266355
comp2276825_c0_seq1|m.83424	0.369369	0.00363207	0.00822479	0.0266519
comp1194322_c0_seq2|m.793	0.309492	0.00380689	0.00856163	0.0277434
comp2274748_c1_seq11|m.78259	-0.253743	0.00397337	0.00881612	0.0285681
gnl_Pdu_trscr_assembly_1|14069;|m.67140	-0.306939	0.00399619	0.00881612	0.0285681
comp2276413_c0_seq21|m.82313	-0.299252	0.0040006	0.00881612	0.0285681
comp2249227_c0_seq1|m.37479	-0.304121	0.00403692	0.00883684	0.0286352
comp2278333_c0_seq10|m.88591	-0.367656	0.00417341	0.00907514	0.0294074
comp2276426_c0_seq2|m.82339	-0.386437	0.00427169	0.00922773	0.0299018
comp2264621_c0_seq1|m.59138	-0.487844	0.00431485	0.00926004	0.0300066
comp2276805_c0_seq8|m.83380	0.447458	0.00439091	0.00936146	0.0303352
comp2272863_c1_seq5|m.74143	-0.24886	0.00441913	0.00936146	0.0303352
comp2273017_c0_seq1|m.74484	-0.267844	0.0044866	0.00944346	0.0306009
comp2257674_c0_seq1|m.48339	1.07666	0.00463849	0.00961982	0.0311724
comp2276804_c0_seq1|m.83376	-0.560609	0.00465018	0.00961982	0.0311724
comp2277617_c1_seq7|m.85877	-0.297239	0.00465828	0.00961982	0.0311724
comp2274693_c0_seq1|m.78142	0.344743	0.0047802	0.00977168	0.0316645
comp2261395_c0_seq1|m.54150	0.773983	0.00479133	0.00977168	0.0316645
comp2274106_c1_seq2|m.76871	0.611622	0.0048721	0.00987507	0.0319995
comp2275714_c2_seq1|m.80469	-0.299042	0.00490892	0.00988864	0.0320435
comp2251806_c0_seq1|m.40480	-0.24092	0.004965	0.00994063	0.032212
comp2273356_c0_seq1|m.75157	0.251079	0.00503139	0.0100125	0.0324448
comp2274581_c1_seq21|m.92631	-0.306685	0.00513637	0.0101598	0.0329223
comp2261716_c0_seq2|m.54597	0.324491	0.00525362	0.010222	0.0331237
comp2212572_c0_seq1|m.15390	0.248328	0.00528581	0.010222	0.0331237
comp2271916_c0_seq1|m.72122	0.364399	0.00532212	0.010222	0.0331237
comp2271871_c0_seq8|m.72023	0.404697	0.00534783	0.010222	0.0331237
gnl_Pdu_trscr_assembly_1|16681;|m.81096	0.213321	0.00535434	0.010222	0.0331237
comp2277505_c0_seq1|m.85479	0.241238	0.00535458	0.010222	0.0331237
comp2272087_c2_seq11|m.72459	0.3349	0.00543699	0.0102643	0.0332607
comp2250982_c0_seq1|m.39507	0.225893	0.00543925	0.0102643	0.0332607
comp1977957_c0_seq1|m.3878	0.434012	0.00554931	0.0103846	0.0336505
comp2257601_c0_seq2|m.48241	-0.237769	0.00556805	0.0103846	0.0336505
comp2242282_c0_seq1|m.30761	-0.331356	0.00559787	0.0103846	0.0336505
comp2276440_c0_seq2|m.82383	0.266956	0.00571445	0.0105413	0.0341583
comp2278405_c0_seq22|m.88893	0.266483	0.0057759	0.0105462	0.0341743
comp2347711_c0_seq1_contamination|m.91628	-0.440308	0.00578137	0.0105462	0.0341743
comp2262281_c0_seq3|m.55504	0.281898	0.00584638	0.0105776	0.0342759
comp2271425_c0_seq4|m.71034	-0.211495	0.00588173	0.0105776	0.0342759
comp2204672_c0_seq1|m.13711	-0.239663	0.0058952	0.0105776	0.0342759
comp2273417_c0_seq5|m.75297	-0.477962	0.00607333	0.0107917	0.0349698
comp2252059_c0_seq1|m.40786	0.313437	0.00619244	0.0107917	0.0349698
comp2276491_c0_seq8|m.82522	-0.21251	0.00619546	0.0107917	0.0349698
comp2277163_c0_seq1|m.84431	-0.30638	0.00620157	0.0107917	0.0349698
comp2271413_c1_seq5|m.70995	-0.363765	0.00622528	0.0107917	0.0349698
comp2256041_c0_seq1|m.46046	0.436658	0.0062363	0.0107917	0.0349698
comp1910314_c0_seq1|m.2848	-0.412597	0.00624461	0.0107917	0.0349698
comp2257070_c0_seq2|m.47513	0.359569	0.00631747	0.0108605	0.0351926
comp2275853_c0_seq1|m.80817	0.461756	0.00638798	0.0109046	0.0353355
comp2278480_c0_seq4|m.89330	0.428257	0.00640954	0.0109046	0.0353355
comp2275358_c0_seq1|m.79627	-0.298571	0.0064516	0.0109195	0.035384
comp2236614_c0_seq1|m.26450	0.450089	0.00651132	0.0109641	0.0355284
comp2238188_c0_seq1|m.27576	-0.568377	0.00667792	0.0111759	0.0362149
comp2275445_c0_seq2|m.79869	-0.381247	0.00670519	0.0111759	0.0362149
comp2272433_c0_seq1|m.73197	0.341787	0.00681807	0.0112991	0.0366141
comp2261876_c0_seq1|m.54865	0.477973	0.00684793	0.0112991	0.0366141
comp2271595_c0_seq2|m.71452	0.292589	0.00695164	0.0114129	0.0369827
gnl_Pdu_trscr_assembly_1|2589;|m.58494	-0.3691	0.0069927	0.0114232	0.0370161
comp2279615_c0_seq1|m.91158	-0.223226	0.00714815	0.0116193	0.0376516
comp1876805_c0_seq1|m.2339	0.274884	0.00718838	0.0116272	0.037677
comp2214845_c0_seq1|m.16111	0.376803	0.00725542	0.0116781	0.037842
comp2138952_c0_seq1|m.6867	0.441115	0.0073256	0.0117335	0.0380217
comp2276442_c0_seq1|m.82386	-0.246507	0.00741331	0.0118164	0.0382901
gnl_Pdu_trscr_assembly_1|4228;|m.63259	-0.522458	0.0075931	0.0120445	0.0390293
comp2263394_c0_seq1|m.57263	0.576623	0.00778144	0.012272	0.0397666
comp2269009_c0_seq1|m.66627	-0.390037	0.00781482	0.012272	0.0397666
comp2223962_c0_seq7|m.19686	-0.374221	0.00784868	0.012272	0.0397666
comp2278623_c0_seq6|m.90693	0.413016	0.00791729	0.0122738	0.0397725
comp1194106_c0_seq1|m.742	0.234259	0.00793159	0.0122738	0.0397725
comp2268869_c0_seq6|m.66344	0.792689	0.00797772	0.0122738	0.0397725
comp2272118_c0_seq11|m.72524	0.446365	0.00803325	0.0122738	0.0397725
gnl_Pdu_trscr_assembly_1|17807;|m.62055	0.242653	0.00803674	0.0122738	0.0397725
comp2269110_c0_seq3|m.66810	-0.282234	0.00807978	0.0122824	0.0398004
comp2271350_c0_seq18|m.70898	0.288385	0.00813464	0.0123088	0.039886
comp2252746_c0_seq1|m.41651	-0.330484	0.00819798	0.0123478	0.0400122
comp2273249_c0_seq4|m.74967	-0.479753	0.0082998	0.0124038	0.0401935
gnl_Pdu_trscr_assembly_1|16061;|m.43221	-0.342361	0.00831069	0.0124038	0.0401935
comp2143334_c0_seq2|m.7649	0.450531	0.0083705	0.0124214	0.0402508
comp2269580_c0_seq1|m.67656	0.269555	0.00839819	0.0124214	0.0402508
comp2270828_c0_seq11|m.69939	-0.359737	0.00864813	0.0127337	0.0412628
comp2264302_c0_seq2|m.58699	-0.459675	0.00882424	0.012935	0.0419151
comp2263612_c1_seq1|m.57550	-0.229747	0.00890241	0.0129703	0.0420294
comp2274999_c0_seq4|m.78837	0.302452	0.0089273	0.0129703	0.0420294
comp2271567_c0_seq1|m.71391	0.427519	0.00922911	0.013331	0.0431983
comp2265370_c0_seq1|m.60276	-0.188739	0.00925679	0.013331	0.0431983
comp2265471_c0_seq5|m.60488	0.281044	0.00944028	0.0134953	0.0437306
comp2277114_c1_seq1|m.84278	0.666801	0.00945304	0.0134953	0.0437306
comp2278480_c1_seq1|m.89333	0.268344	0.00949922	0.0135025	0.043754
comp2256245_c0_seq1|m.46340	-0.313737	0.00956699	0.0135402	0.0438762
comp1194290_c0_seq1|m.781	-0.671685	0.0096219	0.0135595	0.0439386
comp1196959_c0_seq2|m.1014	0.314341	0.00972058	0.01364	0.0441995
comp2205419_c0_seq2|m.13843	-0.30951	0.00989074	0.013801	0.0447213
comp2279340_c0_seq1|m.91103	0.536632	0.00991939	0.013801	0.0447213
comp2269593_c0_seq3|m.67692	0.242026	0.0104308	0.0144514	0.0468287
gnl_Pdu_trscr_assembly_1|11607;|m.26425	0.459142	0.0106101	0.0145999	0.0473101
comp2231610_c0_seq1|m.23229	0.261073	0.010627	0.0145999	0.0473101
comp2276593_c0_seq3|m.82791	0.36063	0.0107389	0.0146147	0.047358
comp2263983_c0_seq1|m.58208	0.215312	0.0107943	0.0146147	0.047358
comp2275110_c1_seq5|m.79090	-0.207794	0.0108232	0.0146147	0.047358
comp2257070_c0_seq2|m.47512	0.592716	0.0108244	0.0146147	0.047358
comp2260797_c0_seq1|m.53088	-0.200179	0.0108603	0.0146147	0.047358
comp2269023_c0_seq1|m.66650	0.196385	0.0110531	0.0147821	0.0479005
comp2271381_c1_seq12|m.70942	0.214866	0.0110747	0.0147821	0.0479005
gnl_Pdu_trscr_assembly_1|18157;|m.24773	0.342272	0.0111504	0.0148228	0.0480323
comp2271802_c0_seq1|m.71876	-0.212797	0.0113803	0.0150674	0.048825
comp2253077_c0_seq1|m.42045	0.182222	0.0115229	0.015195	0.0492384
comp2276498_c2_seq1|m.82546	-0.350193	0.0115907	0.0152232	0.0493299
comp2248291_c0_seq1|m.36455	-0.227397	0.0120787	0.015801	0.051202
comp2275406_c1_seq7|m.79751	0.21989	0.0122895	0.016013	0.0518891
comp2276173_c0_seq1|m.81727	0.23511	0.0124342	0.0160587	0.0520372
comp2254426_c0_seq1|m.43954	-0.368571	0.01252	0.0160587	0.0520372
comp2277722_c0_seq17|m.86189	-0.257399	0.0125343	0.0160587	0.0520372
comp2273813_c0_seq2|m.76128	0.251344	0.0125567	0.0160587	0.0520372
comp2260058_c0_seq1|m.51934	-0.421301	0.0125691	0.0160587	0.0520372
comp2275191_c1_seq2|m.79282	0.349492	0.0126253	0.0160674	0.0520653
comp2252790_c0_seq1|m.41691	0.584323	0.0126738	0.0160674	0.0520653
comp2246514_c1_seq1|m.34691	-0.277293	0.0128289	0.0162014	0.0524996
comp2201786_c0_seq1|m.13247	0.811263	0.0128857	0.0162108	0.0525302
gnl_Pdu_trscr_assembly_1|200732;|m.91056	-0.623588	0.0129503	0.0162111	0.0525311
comp2263508_c0_seq1|m.57408	0.471017	0.0129976	0.0162111	0.0525311
comp2270385_c0_seq11|m.69105	0.36687	0.013034	0.0162111	0.0525311
gnl_Pdu_trscr_assembly_1|7274;|m.39240	0.907584	0.0131204	0.0162167	0.0525492
comp2243933_c0_seq1|m.32211	-0.3612	0.0131373	0.0162167	0.0525492
comp2278363_c0_seq7|m.88713	-0.249998	0.013192	0.0162233	0.0525705
comp2274301_c0_seq6|m.77327	0.377448	0.0133831	0.0163968	0.0531328
comp2275822_c0_seq10|m.80745	-0.337491	0.0135205	0.0165036	0.0534789
comp2261183_c0_seq1|m.53867	0.400163	0.0137241	0.0166894	0.054081
comp2277374_c0_seq2|m.85051	0.576315	0.0137744	0.0166894	0.054081
comp2272491_c1_seq4|m.73302	-0.249042	0.0139036	0.0167477	0.0542699
gnl_Pdu_trscr_assembly_1|7964;|m.49648	0.268131	0.0139245	0.0167477	0.0542699
comp2250281_c0_seq1|m.38657	-0.184109	0.0141178	0.0169182	0.0548223
comp2269201_c0_seq1|m.67004	-0.767515	0.0142767	0.0170445	0.0552315
comp2278554_c0_seq4|m.90013	-0.300201	0.0143508	0.0170445	0.0552315
comp2253217_c0_seq2|m.42336	-0.288346	0.0143789	0.0170445	0.0552315
comp2271535_c0_seq1|m.71319	0.24899	0.0144959	0.0171214	0.0554808
comp2233700_c1_seq1|m.24550	0.628082	0.0145934	0.0171278	0.0555016
comp2265328_c0_seq2|m.60206	-0.29269	0.0146057	0.0171278	0.0555016
comp2268194_c0_seq1|m.65186	-0.329557	0.0146809	0.0171548	0.0555891
comp2277134_c1_seq4|m.84342	0.237859	0.0147497	0.0171741	0.0556515
comp2236992_c0_seq1|m.26663	-0.24558	0.015106	0.0175267	0.0567942
comp2246502_c0_seq1|m.34680	-0.228105	0.015278	0.0176639	0.0572387
comp2271594_c0_seq8|m.71451	-0.573047	0.0154104	0.0177228	0.0574296
comp2267634_c0_seq2|m.64174	-0.459301	0.0154369	0.0177228	0.0574296
comp2279450_c0_seq1|m.91124	0.282935	0.0155002	0.0177334	0.057464
comp2269698_c0_seq1|m.67864	0.245599	0.0155743	0.0177425	0.0574935
comp2257282_c0_seq1|m.47769	-0.187159	0.0156162	0.0177425	0.0574935
comp2263691_c0_seq2|m.57661	-0.323994	0.0158016	0.0178913	0.0579755
comp2266841_c0_seq1|m.62766	0.380701	0.0159023	0.0179064	0.0580243
comp2266869_c0_seq1|m.62813	0.231396	0.015924	0.0179064	0.0580243
comp2278509_c0_seq8|m.89637	0.257996	0.016049	0.0179853	0.0582803
comp2254568_c0_seq1|m.44123	-0.273375	0.01616	0.0180481	0.0584838
comp2269326_c0_seq2|m.67220	-0.216783	0.0164329	0.0182907	0.0592699
comp2277142_c0_seq6|m.84365	0.317946	0.0166342	0.0184522	0.059793
comp2278222_c0_seq3|m.88116	-0.20438	0.0167166	0.0184812	0.0598872
comp2280482_c0_seq1|m.91228	-0.296395	0.0169185	0.0186416	0.0604068
comp2262300_c0_seq2|m.55547	0.188965	0.0175225	0.0191814	0.062156
comp2262887_c0_seq1|m.56477	0.240309	0.0175252	0.0191814	0.062156
comp2271044_c0_seq1|m.70310	-0.186903	0.0176841	0.019187	0.0621743
comp2269345_c0_seq1|m.67253	0.258575	0.0177283	0.019187	0.0621743
comp2251386_c0_seq2|m.40044	-0.304129	0.0177561	0.019187	0.0621743
comp2237757_c0_seq1|m.27251	0.183508	0.017816	0.019187	0.0621743
comp2265703_c0_seq1|m.60844	-0.382657	0.0180362	0.019187	0.0621743
comp2273765_c1_seq6|m.76032	0.609515	0.0180488	0.019187	0.0621743
comp2265462_c0_seq5|m.60462	-0.238389	0.0180842	0.019187	0.0621743
comp2262441_c0_seq1|m.55760	-0.211605	0.0180907	0.019187	0.0621743
comp2269738_c0_seq1|m.67939	-0.188134	0.0181187	0.019187	0.0621743
comp2261150_c0_seq1|m.53829	0.353063	0.0181718	0.019187	0.0621743
comp2265885_c0_seq3|m.61143	0.389647	0.0181731	0.019187	0.0621743
comp2272782_c0_seq2|m.73955	-0.368762	0.0183265	0.0192546	0.0623934
comp2277075_c0_seq2|m.84155	0.239398	0.0183966	0.0192546	0.0623934
comp2211270_c0_seq1|m.14951	0.401966	0.0184131	0.0192546	0.0623934
comp2275759_c0_seq17|m.80560	-0.169374	0.0185257	0.0192629	0.0624203
gnl_Pdu_trscr_assembly_1|20792;|m.71829	0.165102	0.0185632	0.0192629	0.0624203
comp2271667_c0_seq1|m.71637	0.193661	0.0186542	0.0192629	0.0624203
comp2258349_c0_seq1|m.49321	-0.174072	0.0186557	0.0192629	0.0624203
comp2274537_c0_seq28|m.77857	-0.285665	0.0188521	0.0193766	0.0627884
comp2271637_c0_seq1|m.71562	0.311651	0.0188837	0.0193766	0.0627884
comp2107035_c0_seq2|m.6021	-0.217026	0.0192656	0.0197068	0.0638587
comp1326513_c0_seq1|m.1923	-0.411942	0.0193615	0.0197434	0.0639772
comp2276743_c0_seq1|m.83169	0.2504	0.0195209	0.0198443	0.0643042
comp1769718_c0_seq1|m.2239	0.273005	0.0198022	0.0200682	0.0650296
comp2232641_c0_seq7|m.23875	-0.185996	0.0200857	0.0202928	0.0657576
comp2269793_c0_seq1|m.68039	0.318618	0.0204072	0.0205544	0.0666051
comp2275266_c0_seq21|m.79421	-0.247395	0.0206394	0.0206697	0.0669789
comp2276528_c1_seq4|m.82615	0.75072	0.0207077	0.0206697	0.0669789
comp2275153_c0_seq1|m.79199	0.188935	0.0207329	0.0206697	0.0669789
comp2273778_c1_seq23|m.76059	0.524988	0.0207735	0.0206697	0.0669789
comp2265386_c0_seq2|m.60299	0.184546	0.020856	0.0206798	0.0670116
comp2276314_c0_seq1|m.82075	0.480736	0.0209096	0.0206798	0.0670116
comp2247821_c0_seq5|m.35979	0.307929	0.0209896	0.0206966	0.067066
gnl_Pdu_trscr_assembly_1|3867;|m.65412	1.09267	0.0213736	0.0210121	0.0680884
comp2262197_c0_seq1|m.55346	0.458753	0.0215935	0.0211115	0.0684105
comp2275625_c0_seq11|m.80264	-0.479968	0.0216033	0.0211115	0.0684105
comp2274137_c1_seq25|m.76929	-0.597081	0.0223143	0.0217417	0.0704524
comp2266882_c0_seq1|m.62832	0.346847	0.0224869	0.021845	0.0707871
comp2267341_c0_seq1|m.63653	-0.188972	0.0226754	0.0219114	0.0710026
comp2197446_c0_seq1|m.12404	0.228232	0.0227007	0.0219114	0.0710026
comp2263950_c0_seq2|m.58147	0.431849	0.0227652	0.0219114	0.0710026
comp2280694_c0_seq1|m.91236	0.550991	0.0228223	0.0219114	0.0710026
comp2264888_c0_seq4|m.59493	0.524332	0.0229201	0.0219413	0.0710992
comp2268443_c0_seq2|m.65634	0.225009	0.0230177	0.0219706	0.0711942
comp2263822_c0_seq1|m.57945	0.211502	0.0237568	0.0226103	0.0732672
comp2271783_c0_seq2|m.71842	-0.183972	0.0242524	0.0230154	0.0745798
comp2254167_c0_seq1|m.43587	0.231104	0.0243847	0.0230742	0.0747704
comp2268857_c0_seq2|m.66328	-0.210287	0.0245048	0.0231212	0.0749226
comp2276743_c1_seq1|m.83170	0.215655	0.0247879	0.0233213	0.0755712
comp2268417_c0_seq2|m.65592	-0.192052	0.0249984	0.0234475	0.07598
comp2271944_c0_seq11|m.72172	0.361535	0.0250879	0.0234475	0.07598
comp2220386_c0_seq1|m.18230	0.15867	0.0251763	0.0234475	0.07598
comp2278133_c0_seq3|m.87701	0.235971	0.0252328	0.0234475	0.07598
comp2278362_c0_seq1|m.88712	-0.208627	0.0252791	0.0234475	0.07598
comp2276412_c0_seq1|m.82311	-0.163297	0.0254163	0.0234588	0.0760167
comp2268336_c0_seq2|m.65472	-0.148958	0.0254342	0.0234588	0.0760167
comp2275933_c0_seq1|m.81045	0.463698	0.0255801	0.0235273	0.0762386
comp2237053_c0_seq1|m.26700	0.297249	0.0260796	0.0238907	0.0774163
comp2271906_c0_seq1|m.72107	0.253752	0.0261688	0.0238907	0.0774163
comp2268978_c0_seq1|m.66540	0.646936	0.0261935	0.0238907	0.0774163
comp2253516_c0_seq4|m.42708	0.341922	0.0262821	0.0239052	0.0774631
comp2278485_c0_seq1|m.89371	0.340428	0.0264024	0.0239483	0.0776028
comp2273576_c0_seq1|m.75622	0.289088	0.0265392	0.024006	0.0777898
gnl_Pdu_trscr_assembly_1|1213;|m.70099	-0.167046	0.0267664	0.024145	0.0782401
comp2278536_c1_seq38|m.89884	0.228953	0.0271674	0.0243902	0.0790349
comp1961272_c0_seq1|m.3584	0.454286	0.0271868	0.0243902	0.0790349
comp2277816_c0_seq2|m.86536	-0.257803	0.0274566	0.0245651	0.0796016
comp2267483_c0_seq3|m.63903	-0.297741	0.0276018	0.024628	0.0798053
comp2265464_c0_seq1|m.60472	-0.421725	0.0278489	0.0247811	0.0803016
comp2263909_c0_seq2|m.58087	0.146615	0.0279683	0.02482	0.0804277
comp2273142_c0_seq1|m.74744	-0.339646	0.028115	0.024883	0.0806316
comp2272920_c0_seq1|m.74280	0.305578	0.0283507	0.0250241	0.0810891
comp2278161_c0_seq3|m.87805	0.224611	0.0284592	0.0250526	0.0811812
comp2271636_c1_seq22|m.71557	-0.170446	0.0286186	0.0251255	0.0814175
comp2273216_c0_seq3|m.74900	0.157406	0.0296634	0.0259267	0.0840139
comp2139380_c0_seq1|m.6935	0.380374	0.0297518	0.0259267	0.0840139
comp2273628_c0_seq6|m.75728	-0.319098	0.0297681	0.0259267	0.0840139
comp2272182_c0_seq2|m.72649	0.294275	0.0301782	0.0261896	0.0848656
comp2072973_c0_seq1|m.5296	0.248154	0.0302294	0.0261896	0.0848656
comp2228430_c0_seq1|m.21640	0.249819	0.0305778	0.0264201	0.0856125
comp2234837_c0_seq1|m.25285	0.203307	0.0306564	0.0264201	0.0856125
comp2242407_c0_seq1|m.30845	0.496351	0.0310093	0.0266543	0.0863714
comp2278470_c0_seq2|m.89275	0.532198	0.0312116	0.0267245	0.086599
gi|613484551	0.385354	0.0313008	0.0267245	0.086599
comp2276719_c0_seq5|m.83124	-0.334114	0.0314036	0.0267245	0.086599
comp2271909_c0_seq2|m.72111	-0.208778	0.0314165	0.0267245	0.086599
gnl_Pdu_trscr_assembly_1|9334;|m.28552	0.207725	0.0315874	0.0268004	0.086845
comp2265255_c2_seq1|m.60100	0.358006	0.0335442	0.0283358	0.0918203
comp2265589_c0_seq2|m.60673	-0.142951	0.0336502	0.0283358	0.0918203
comp2268391_c0_seq1|m.65566	-0.182197	0.0336559	0.0283358	0.0918203
comp2277311_c0_seq3|m.84858	0.374159	0.034061	0.0286035	0.0926878
comp2268225_c0_seq5|m.65245	0.476572	0.0343494	0.0287529	0.0931718
comp2277759_c0_seq3|m.86312	0.262893	0.034414	0.0287529	0.0931718
comp2269029_c1_seq11|m.66661	-0.141103	0.0345306	0.0287771	0.0932502
comp2260519_c0_seq10|m.52611	-0.211962	0.0349739	0.028995	0.0939563
comp2272435_c0_seq2|m.73201	0.725354	0.034985	0.028995	0.0939563
comp2269230_c0_seq2|m.67055	-0.208248	0.0350726	0.028995	0.0939563
comp2202068_c0_seq1|m.13304	-0.197299	0.0351453	0.028995	0.0939563
comp2254668_c0_seq2|m.44236	0.195379	0.0354191	0.0291476	0.0944509
comp2254376_c0_seq1|m.43911	0.183586	0.0357932	0.0293818	0.0952099
comp1226347_c0_seq1|m.1231	0.250746	0.0366836	0.0300376	0.097335
comp2274258_c1_seq4|m.77217	-0.167399	0.0368013	0.0300591	0.0974046
comp1888169_c0_seq2|m.2479	0.632188	0.037144	0.0301731	0.097774
comp2271675_c0_seq2|m.71655	0.429542	0.0371857	0.0301731	0.097774
comp2263277_c0_seq1|m.57091	-0.173829	0.0372166	0.0301731	0.097774
comp2254566_c0_seq1|m.44122	-0.159531	0.0375057	0.0303231	0.0982601
comp2251594_c0_seq1|m.40214	-0.161978	0.0375866	0.0303231	0.0982601
comp2273519_c1_seq9|m.75533	0.446551	0.0378324	0.0303231	0.0982601
comp2271419_c1_seq1|m.71009	0.58446	0.0378512	0.0303231	0.0982601
comp2266473_c1_seq14|m.62086	-0.228395	0.0379204	0.0303231	0.0982601
comp2141952_c0_seq1|m.7380	0.187955	0.0379692	0.0303231	0.0982601
comp2270845_c1_seq1|m.69967	0.26687	0.0380541	0.0303231	0.0982601
comp2256252_c0_seq1|m.46348	0.729333	0.0381404	0.0303231	0.0982601
comp2272559_c0_seq1|m.73440	-0.187112	0.0383756	0.0303685	0.098407
comp2275833_c0_seq1|m.80771	-0.313198	0.0384395	0.0303685	0.098407
comp2251866_c0_seq1|m.40557	-0.14741	0.0384749	0.0303685	0.098407
comp2267169_c0_seq1|m.63315	-0.185406	0.0386274	0.0304157	0.0985601

## Sheet: IM_NM vs M_NM_Female
	logFC	p.mod	q.mod	adjusted.pvalue
comp2242933_c0_seq1_m.31351	1.62224	1.69e-07	5.25e-05	0.000179909
gene17_m.92593	1.55385	5.54e-07	8.62e-05	0.000294976
comp2272698_c0_seq4_m.73763	1.03524	1.08e-06	0.000111877	0.000383061
comp2247988_c0_seq1_m.36173	-1.20869	2.2e-06	0.000171284	0.000586466
comp2262137_c0_seq4_m.55246	-0.972617	3.2e-06	0.000186382	0.00063816
comp2272319_c0_seq24_m.72950	1.67755	3.6e-06	0.000186382	0.00063816
comp2256041_c0_seq1_m.46046	0.989815	1.56e-05	0.000692057	0.00236956
comp2277680_c0_seq25_m.86056	-0.722177	2.1e-05	0.000814822	0.0027899
comp2234282_c0_seq1_m.24908	0.952525	2.66e-05	0.000834383	0.00285688
comp2271994_c0_seq2_m.72269	-1.17059	2.69e-05	0.000834383	0.00285688
comp2266280_c0_seq1_m.61789	0.876652	3.35e-05	0.000888511	0.00304221
comp2265897_c0_seq5_m.61166	0.680737	3.43e-05	0.000888511	0.00304221
comp2263011_c0_seq1_m.56689	0.770215	5.86e-05	0.00140075	0.0047961
comp2275110_c1_seq5_m.79090	0.720211	6.43e-05	0.00142473	0.00487819
comp2278587_c0_seq14_m.90327	-0.580468	6.88e-05	0.00142473	0.00487819
comp2275841_c0_seq1_m.80783	-0.718867	7.71e-05	0.00144781	0.00495721
comp2269185_c0_seq2_m.66963	-0.630804	7.92e-05	0.00144781	0.00495721
comp2272233_c0_seq1_m.72760	-0.553956	0.000100717	0.00173879	0.00595351
gnl_Pdu_trscr_assembly_1_91632_m.21453	0.831518	0.000111258	0.00175754	0.00601773
comp2237468_c0_seq1_m.27022	-1.18543	0.000117501	0.00175754	0.00601773
comp2261399_c0_seq2_m.54155	-1.17906	0.000118771	0.00175754	0.00601773
comp2263291_c0_seq2_m.57114	0.735984	0.000129893	0.00183476	0.0062821
comp2262137_c0_seq3_m.92268	-1.31532	0.000159413	0.00205595	0.00703945
comp2275822_c0_seq10_m.80745	-0.881273	0.000168594	0.00205595	0.00703945
comp2263115_c0_seq2_m.56831	0.451088	0.000171063	0.00205595	0.00703945
comp2276768_c0_seq2_m.83249	0.681357	0.000176885	0.00205595	0.00703945
comp2275905_c0_seq4_m.80965	0.688075	0.000185315	0.00205595	0.00703945
comp2265326_c0_seq3_m.60204	-0.770326	0.000200118	0.00205595	0.00703945
comp2258554_c0_seq1_m.49568	-0.501977	0.000204163	0.00205595	0.00703945
comp2274819_c0_seq2_m.78403	0.505691	0.000212912	0.00205595	0.00703945
comp2254520_c0_seq1_m.44059	-0.549515	0.000221481	0.00205595	0.00703945
comp2278077_c0_seq3_m.87468	1.04506	0.000221712	0.00205595	0.00703945
comp2263612_c1_seq1_m.57550	-0.487462	0.000225915	0.00205595	0.00703945
comp2254167_c0_seq1_m.43587	0.809	0.000231365	0.00205595	0.00703945
comp2278630_c0_seq8_m.90809	-0.589548	0.000231561	0.00205595	0.00703945
comp2273257_c0_seq9_m.74986	1.05801	0.000257143	0.00219038	0.00749974
comp2261623_c0_seq1_m.54431	-0.728974	0.000260799	0.00219038	0.00749974
comp2277933_c1_seq7_m.86947	-0.726316	0.000269372	0.00220285	0.00754242
comp2268473_c1_seq1_m.65668	1.08247	0.000292897	0.00231511	0.0079268
comp2267341_c0_seq1_m.63653	0.461917	0.000298	0.00231511	0.0079268
comp2276750_c0_seq1_m.83194	0.756653	0.000333569	0.00248317	0.00850223
comp2266171_c0_seq1_m.61557	0.635489	0.000341374	0.00248317	0.00850223
comp2259221_c0_seq1_m.50687	0.502593	0.000343605	0.00248317	0.00850223
comp2254641_c1_seq1_m.44200	-0.461082	0.000358953	0.00248913	0.00852265
comp2266507_c0_seq10_m.62138	-0.438057	0.00036045	0.00248913	0.00852265
comp2272961_c0_seq1_m.74370	0.669413	0.000434247	0.00280917	0.00961843
comp2276277_c0_seq18_m.81972	0.544146	0.000434908	0.00280917	0.00961843
comp2256220_c0_seq1_m.46316	-0.660448	0.000447211	0.00280917	0.00961843
comp2277908_c1_seq11_m.86865	0.52893	0.000455845	0.00280917	0.00961843
gnl_Pdu_trscr_assembly_1_5530_m.58454	-0.578486	0.000460499	0.00280917	0.00961843
comp2271350_c0_seq18_m.70897	0.755108	0.000475704	0.00280917	0.00961843
comp2271350_c0_seq18_m.70898	0.7366	0.000478078	0.00280917	0.00961843
comp1945561_c0_seq2_m.3380	-0.806655	0.000479114	0.00280917	0.00961843
gnl_Pdu_trscr_assembly_1_16296_m.13041	-0.497975	0.000489284	0.00281567	0.0096407
comp2277729_c0_seq10_m.86207	-0.680144	0.000511242	0.00285164	0.00976385
comp2257905_c0_seq1_m.48664	-0.551248	0.000513887	0.00285164	0.00976385
comp2267209_c0_seq1_m.63399	-0.551338	0.000530033	0.00288964	0.00989394
comp2274446_c0_seq19_m.77642	-0.48095	0.000554123	0.00296889	0.0101653
comp2204672_c0_seq1_m.13711	-0.431626	0.000588174	0.00297433	0.0101839
comp2277501_c0_seq23_m.85461	-0.373409	0.000589084	0.00297433	0.0101839
comp2275107_c0_seq4_m.79080	-0.444295	0.000591557	0.00297433	0.0101839
comp2278405_c0_seq22_m.88893	-0.716276	0.000596638	0.00297433	0.0101839
comp2276743_c0_seq1_m.83169	0.465541	0.000631037	0.00297433	0.0101839
comp2277337_c0_seq4_m.84929	0.396427	0.00063226	0.00297433	0.0101839
comp2269580_c0_seq1_m.67656	0.474511	0.000648942	0.00297433	0.0101839
comp2262317_c0_seq2_m.55577	0.6543	0.000654412	0.00297433	0.0101839
comp2264838_c0_seq3_m.59436	-0.939976	0.000654524	0.00297433	0.0101839
comp2269171_c0_seq3_m.66933	0.84646	0.00066993	0.00297433	0.0101839
comp2263822_c0_seq1_m.57945	0.769184	0.000676817	0.00297433	0.0101839
comp2278554_c0_seq4_m.90013	-0.557032	0.000677515	0.00297433	0.0101839
comp2263928_c0_seq2_m.58107	0.673708	0.00069289	0.00297433	0.0101839
comp2272547_c0_seq4_m.73421	-0.501026	0.000700897	0.00297433	0.0101839
comp2263277_c0_seq1_m.57091	-0.45688	0.000706973	0.00297433	0.0101839
comp2278474_c0_seq1_m.89294	-0.53443	0.000712855	0.00297433	0.0101839
comp2274541_c0_seq1_m.77862	-0.929137	0.000717851	0.00297433	0.0101839
comp2270876_c0_seq2_m.70018	-0.528866	0.000753305	0.00302666	0.0103631
comp2232290_c0_seq2_m.23637	-0.991833	0.000761395	0.00302666	0.0103631
comp2277933_c1_seq7_m.86946	-0.744451	0.0007686	0.00302666	0.0103631
comp2229729_c0_seq1_m.22264	0.463016	0.000779552	0.00302666	0.0103631
comp2276871_c0_seq8_m.83582	0.773396	0.000782014	0.00302666	0.0103631
comp2276035_c1_seq16_m.81307	-0.479738	0.000788921	0.00302666	0.0103631
gnl_Pdu_trscr_assembly_1_16061_m.43221	-0.58987	0.000803155	0.00304357	0.010421
comp2263896_c0_seq3_m.58065	0.412273	0.000812916	0.00304357	0.010421
comp2277114_c1_seq1_m.84278	0.445384	0.000836837	0.00309583	0.0105999
comp2266512_c0_seq8_m.62145	0.386005	0.000856713	0.00310248	0.0106227
comp2279567_c0_seq1_m.91146	0.574952	0.000875081	0.00310248	0.0106227
comp2254470_c0_seq1_m.44006	-0.412597	0.00087736	0.00310248	0.0106227
comp2279445_c0_seq1_m.91120	-0.430096	0.000892479	0.00310248	0.0106227
comp2268892_c0_seq1_m.66381	-0.941964	0.00089529	0.00310248	0.0106227
comp2252847_c0_seq1_m.41763	0.439254	0.000898539	0.00310248	0.0106227
comp2262281_c0_seq3_m.55504	-0.677357	0.000920705	0.00314409	0.0107652
gnl_Pdu_trscr_assembly_1_2615_m.68529	0.391749	0.000948681	0.00317287	0.0108637
comp2278366_c0_seq5_m.88731	-0.385888	0.000949554	0.00317287	0.0108637
comp2266692_c0_seq1_m.62504	0.589015	0.00097226	0.00319297	0.0109325
comp1958245_c0_seq1_m.3536	-0.364415	0.00097612	0.00319297	0.0109325
comp2274806_c0_seq1_m.78376	-0.608567	0.000998341	0.00323164	0.0110649
comp2272254_c0_seq4_m.72822	-0.759599	0.00102298	0.00326487	0.0111787
comp1838578_c0_seq1_m.2293	0.818885	0.00102962	0.00326487	0.0111787
comp2246514_c1_seq1_m.34691	-0.510578	0.00104462	0.00327897	0.011227
comp2248821_c1_seq2_m.37050	-0.386655	0.00108263	0.0033643	0.0115192
comp2278062_c0_seq4_m.87412	0.527146	0.00111125	0.00338776	0.0115995
comp2267732_c0_seq2_m.64331	-0.491849	0.00111198	0.00338776	0.0115995
comp2279523_c0_seq1_m.91136	-0.443148	0.00116687	0.0034952	0.0119674
comp2347711_c0_seq1_contamination_m.91628	-0.703851	0.00117857	0.0034952	0.0119674
comp2278376_c0_seq1_m.88768	-0.525385	0.00118099	0.0034952	0.0119674
comp2269987_c0_seq2_m.68354	0.343709	0.00120008	0.00351819	0.0120461
comp2263346_c1_seq31_m.57192	-0.391956	0.00121356	0.00352445	0.0120675
comp2269060_c1_seq1_m.66719	-0.90393	0.00122654	0.00352918	0.0120837
gnl_Pdu_trscr_assembly_1_14638_m.60097	-0.508651	0.00131356	0.00372949	0.0127695
comp2276426_c0_seq2_m.82339	-0.6316	0.00132826	0.00372949	0.0127695
comp2273599_c0_seq7_m.75677	-0.348076	0.0013325	0.00372949	0.0127695
comp2278454_c0_seq1_m.89160	-0.406946	0.00135372	0.00372949	0.0127695
comp2265768_c0_seq2_m.60943	-0.678687	0.00135616	0.00372949	0.0127695
comp1194294_c0_seq1_m.785	0.412652	0.00137143	0.00373838	0.0128
comp2254206_c0_seq1_m.43646	0.410052	0.00144802	0.00383817	0.0131417
comp2004487_c0_seq1_m.4269	0.803372	0.00144933	0.00383817	0.0131417
comp2281676_c0_seq1_m.91255	0.65334	0.00146886	0.00383817	0.0131417
comp2264302_c0_seq2_m.58699	-0.67835	0.00146917	0.00383817	0.0131417
comp2263873_c0_seq9_m.58029	-1.03469	0.00148592	0.00383817	0.0131417
comp2269230_c0_seq2_m.67055	-0.4762	0.00148978	0.00383817	0.0131417
comp2261379_c0_seq1_m.54133	-0.726983	0.00149449	0.00383817	0.0131417
comp2265656_c0_seq3_m.60780	-0.457028	0.00155412	0.0039586	0.013554
comp2275662_c1_seq10_m.80344	-0.334762	0.00157423	0.00397716	0.0136175
comp2265885_c0_seq3_m.61143	-0.462303	0.00159752	0.00397716	0.0136175
comp2270372_c0_seq1_m.69078	0.350691	0.00159981	0.00397716	0.0136175
comp2276936_c0_seq3_m.83786	0.712389	0.00166252	0.00410025	0.014039
isotig10568_m.92324	-1.08821	0.00169433	0.00412624	0.014128
comp2271649_c0_seq1_m.71599	-0.687405	0.00169961	0.00412624	0.014128
comp2274581_c1_seq21_m.92631	-0.520609	0.00174494	0.00420344	0.0143923
comp2262465_c0_seq5_m.55795	-1.04835	0.00178611	0.00424537	0.0145359
comp2275523_c0_seq29_m.80039	0.42551	0.00179861	0.00424537	0.0145359
comp2239691_c0_seq1_m.28548	-0.856543	0.00180467	0.00424537	0.0145359
comp2278333_c0_seq10_m.88591	-0.454066	0.00186339	0.00424537	0.0145359
comp2277605_c1_seq7_m.85828	0.586358	0.0018667	0.00424537	0.0145359
comp2265735_c0_seq4_m.60895	-0.305002	0.00187249	0.00424537	0.0145359
comp2274137_c1_seq25_m.76929	0.538591	0.00187395	0.00424537	0.0145359
comp2189372_c0_seq1_m.11219	-0.326095	0.00188495	0.00424537	0.0145359
comp2236614_c0_seq1_m.26450	-0.71056	0.00188529	0.00424537	0.0145359
comp2287273_c0_seq1_contamination_m.91384	0.348061	0.00193865	0.00433411	0.0148397
comp2275445_c0_seq2_m.79869	-0.424589	0.00196352	0.00433847	0.0148547
comp1781461_c0_seq1_m.2253	-0.561297	0.00196852	0.00433847	0.0148547
comp2267172_c0_seq1_m.63318	0.402206	0.00208652	0.00456613	0.0156342
comp2269060_c0_seq1_m.66718	-0.672721	0.00211175	0.00458904	0.0157126
comp2256095_c0_seq1_m.46136	-0.476823	0.00218302	0.00470728	0.0161175
comp2277869_c0_seq29_m.86707	0.379346	0.00220254	0.00470728	0.0161175
comp2261368_c1_seq1_m.54120	-0.342912	0.00221161	0.00470728	0.0161175
comp2262339_c0_seq1_m.55609	0.373858	0.00225386	0.00476459	0.0163137
comp2275358_c0_seq1_m.79627	-0.397834	0.00228711	0.00477816	0.0163602
comp2264621_c0_seq1_m.59138	-0.539045	0.00230363	0.00477816	0.0163602
comp2263667_c0_seq1_m.57601	0.61235	0.00230641	0.00477816	0.0163602
gnl_Pdu_trscr_assembly_1_326_m.78835	-0.445115	0.00235505	0.00484662	0.0165945
comp2205419_c0_seq2_m.13843	-0.50141	0.00238204	0.0048699	0.0166743
comp2232909_c0_seq1_m.24034	0.569508	0.00244314	0.00495187	0.0169549
comp2275698_c0_seq5_m.80432	-0.431575	0.002454	0.00495187	0.0169549
comp2271425_c0_seq4_m.71034	-0.315697	0.00248303	0.00497811	0.0170448
comp2265386_c0_seq2_m.60299	0.632235	0.00254303	0.00505137	0.0172956
comp2268441_c0_seq1_m.65632	0.795161	0.00255207	0.00505137	0.0172956
comp2245721_c0_seq1_m.33844	0.53022	0.00258106	0.0050707	0.0173618
comp2275542_c0_seq9_m.80087	-0.527272	0.00260806	0.0050707	0.0173618
comp2277816_c0_seq2_m.86536	-0.391119	0.00261079	0.0050707	0.0173618
comp2278363_c0_seq7_m.88713	-0.362839	0.00263213	0.00508038	0.0173949
comp2276668_c0_seq1_m.83017	-0.537412	0.00272669	0.00523042	0.0179087
comp2273417_c0_seq5_m.75297	-0.555833	0.00292069	0.00554218	0.0189761
comp2276523_c0_seq2_m.82609	0.296694	0.00292489	0.00554218	0.0189761
comp2274537_c0_seq28_m.77857	-0.481369	0.00298526	0.00561856	0.0192376
comp2252285_c0_seq2_m.41107	-0.456489	0.00300136	0.00561856	0.0192376
comp1194106_c0_seq1_m.742	0.325308	0.00309105	0.0057228	0.0195945
comp2260103_c0_seq1_m.51994	-0.341449	0.00311152	0.0057228	0.0195945
comp2278054_c0_seq40_m.87392	-0.503479	0.00311229	0.0057228	0.0195945
comp2276966_c0_seq13_m.83854	-0.320716	0.0031328	0.00572662	0.0196076
comp1194362_c0_seq2_m.804	0.340524	0.00315321	0.00573024	0.01962
comp2269297_c0_seq2_m.67181	0.667281	0.00317731	0.0057314	0.019624
comp2270576_c0_seq1_m.69463	0.580622	0.00319074	0.0057314	0.019624
comp2261018_c0_seq2_m.53614	-0.356466	0.0032371	0.00578125	0.0197947
comp2274295_c0_seq2_m.77311	-0.591408	0.00335688	0.00596091	0.0204098
comp2271225_c0_seq5_m.70641	-0.742504	0.00341581	0.0060311	0.0206501
comp2253149_c0_seq1_m.42245	0.530348	0.00344896	0.00603727	0.0206713
comp2269158_c0_seq1_m.66914	0.352603	0.00345816	0.00603727	0.0206713
comp2270797_c0_seq10_m.69872	-0.499099	0.00353261	0.00613279	0.0209983
comp2269326_c0_seq2_m.67220	-0.328425	0.00355242	0.00613292	0.0209988
comp2273865_c0_seq2_m.76255	0.481263	0.00366195	0.00625708	0.0214239
comp2274278_c0_seq6_m.77267	-0.396019	0.003667	0.00625708	0.0214239
comp2265049_c0_seq3_m.59764	0.638612	0.00368475	0.00625708	0.0214239
comp2266503_c0_seq6_m.62129	-0.484841	0.00371794	0.00627913	0.0214994
comp2268798_c0_seq2_m.66233	0.561518	0.00373984	0.00628199	0.0215092
comp2277475_c0_seq2_m.85365	-0.486681	0.00379839	0.00634604	0.0217285
comp2278589_c0_seq3_m.90346	-0.33435	0.00383778	0.00637756	0.0218364
comp2242282_c0_seq1_m.30761	-0.371601	0.00389087	0.00642252	0.0219903
gnl_Pdu_trscr_assembly_1_4228_m.63259	-0.594432	0.00390618	0.00642252	0.0219903
comp2254477_c0_seq1_m.44015	0.40774	0.00411251	0.00672618	0.02303
comp2276442_c0_seq1_m.82386	-0.365411	0.00436942	0.00710446	0.0243252
gnl_Pdu_trscr_assembly_1_1514_m.69841	0.351148	0.00442194	0.00710446	0.0243252
comp2279297_c0_seq1_m.91091	0.28704	0.00443523	0.00710446	0.0243252
comp2277132_c1_seq1_m.84335	0.502388	0.00443524	0.00710446	0.0243252
comp2273038_c0_seq3_m.74522	-0.613642	0.0044901	0.00715545	0.0244998
comp2269324_c0_seq1_m.67217	0.296224	0.00466452	0.00738636	0.0252905
comp1953876_c0_seq1_m.3493	0.47715	0.00468254	0.00738636	0.0252905
comp2208474_c0_seq1_m.14351	0.270912	0.00472856	0.00742129	0.0254101
comp2272299_c0_seq11_m.72914	-0.52584	0.00477179	0.00742765	0.0254318
comp2273017_c0_seq1_m.74484	-0.302078	0.00478269	0.00742765	0.0254318
comp2280591_c0_seq1_m.91233	0.837421	0.00480432	0.00742765	0.0254318
comp2275478_c0_seq7_m.79935	0.380713	0.00488082	0.00750856	0.0257089
comp2277479_c0_seq1_m.85385	-0.312493	0.0050308	0.00770116	0.0263683
comp2265883_c1_seq1_m.61140	0.701157	0.00516729	0.00785609	0.0268988
comp2268857_c0_seq2_m.66328	-0.3572	0.00520415	0.00785609	0.0268988
comp2271413_c1_seq5_m.70995	-0.335377	0.00520785	0.00785609	0.0268988
comp2268172_c0_seq1_m.65149	0.309614	0.00543563	0.00814129	0.0278753
comp2276648_c1_seq1_m.82962	-0.398573	0.0054493	0.00814129	0.0278753
comp1965369_c0_seq1_contamination_m.3664	0.557277	0.00548087	0.00814927	0.0279026
comp2278362_c0_seq1_m.88712	-0.327543	0.00561484	0.00828108	0.0283539
comp2226643_c0_seq1_m.20830	-0.297421	0.00562282	0.00828108	0.0283539
comp2274999_c0_seq4_m.78837	0.365437	0.00576358	0.00844835	0.0289267
comp2277722_c0_seq17_m.86189	-0.352093	0.00598791	0.00873393	0.0299045
comp2277484_c0_seq6_m.85397	0.324229	0.00606329	0.00873393	0.0299045
comp2253516_c0_seq4_m.42708	-1.01437	0.00606354	0.00873393	0.0299045
comp2257601_c0_seq2_m.48241	-0.302845	0.00607083	0.00873393	0.0299045
comp2277332_c0_seq1_m.84919	0.341949	0.00610778	0.00874659	0.0299478
comp2269321_c1_seq1_m.67212	-0.30869	0.0061837	0.0088147	0.030181
comp2273628_c0_seq6_m.75728	-0.468115	0.00629236	0.00892863	0.0305711
comp2256245_c0_seq1_m.46340	-0.371763	0.00648959	0.00916663	0.031386
comp2140166_c0_seq1_m.7086	0.410752	0.00654849	0.00920797	0.0315276
comp2274517_c0_seq1_m.77807	0.340437	0.0066312	0.00924637	0.031659
comp2276413_c0_seq21_m.82313	-0.324124	0.0066353	0.00924637	0.031659
comp1226347_c0_seq1_m.1231	0.291501	0.0067929	0.00942372	0.0322663
comp2277388_c0_seq8_m.85093	-0.607575	0.00689083	0.0095171	0.032586
gnl_Pdu_trscr_assembly_1_17807_m.62055	0.254695	0.00702553	0.0096602	0.033076
comp2274748_c1_seq11_m.78259	-0.286347	0.00706767	0.00967533	0.0331277
comp2278133_c0_seq3_m.87701	0.327994	0.00722202	0.00978281	0.0334958
comp2257939_c0_seq1_m.48703	-0.336224	0.00722739	0.00978281	0.0334958
comp2275312_c0_seq8_m.79518	-0.516723	0.00724063	0.00978281	0.0334958
comp2234079_c0_seq2_m.24745	0.362	0.00737773	0.00989436	0.0338777
comp2276498_c2_seq1_m.82546	-0.572885	0.00738686	0.00989436	0.0338777
comp2244968_c0_seq1_m.33120	0.653033	0.00744724	0.00993241	0.034008
comp2202068_c0_seq1_m.13304	-0.347557	0.00748836	0.00994457	0.0340496
comp2275674_c1_seq1_m.80370	-0.533282	0.00761385	0.0100517	0.0344165
comp2265589_c0_seq2_m.60673	0.252038	0.00763373	0.0100517	0.0344165
comp2279213_c0_seq1_m.91075	0.253696	0.00776982	0.0101877	0.0348822
comp2263661_c0_seq1_m.57595	-0.256924	0.00795813	0.0103908	0.0355775
comp2264022_c0_seq13_m.58310	0.342952	0.00802454	0.0104337	0.0357243
comp2212572_c0_seq1_m.15390	0.263816	0.00808629	0.0104679	0.0358413
comp2263691_c0_seq2_m.57661	-0.485048	0.00814872	0.0104679	0.0358413
comp2262927_c0_seq2_m.56544	0.327397	0.00816342	0.0104679	0.0358413
comp2276743_c1_seq1_m.83170	0.341277	0.00818556	0.0104679	0.0358413
comp1244797_c0_seq1_m.1278	0.271619	0.00822463	0.0104747	0.0358648
comp2214845_c0_seq1_m.16111	0.441748	0.0084095	0.0105934	0.0362712
comp2142866_c0_seq1_m.7576	0.502861	0.00841133	0.0105934	0.0362712
comp2277243_c1_seq3_m.84671	0.325323	0.00842009	0.0105934	0.0362712
comp2241992_c0_seq1_m.30524	0.367174	0.00857675	0.010747	0.036797
comp2277088_c0_seq32_m.84183	-0.274204	0.00884204	0.0110349	0.0377829
comp2280178_c0_seq1_m.91219	-0.9527	0.00888	0.011038	0.0377933
comp2273141_c0_seq2_m.74737	-0.264258	0.00930419	0.0115191	0.0394409
comp2266680_c0_seq1_m.62479	-0.321954	0.00953987	0.0117597	0.0402645
comp2272495_c0_seq1_m.73308	0.585387	0.00957417	0.0117597	0.0402645
comp2263983_c0_seq1_m.58208	0.243077	0.00992118	0.0121001	0.0414299
comp2258349_c0_seq1_m.49321	-0.223402	0.00995678	0.0121001	0.0414299
comp2268937_c0_seq1_m.66472	0.310953	0.0099938	0.0121001	0.0414299
comp2274713_c1_seq7_m.78178	0.395737	0.0100184	0.0121001	0.0414299
comp2276461_c0_seq7_m.82444	-0.299511	0.0100623	0.0121001	0.0414299
comp2277945_c0_seq2_m.86985	-0.82688	0.0100959	0.0121001	0.0414299
comp2261971_c0_seq1_m.55022	-0.397622	0.0101238	0.0121001	0.0414299
comp2270404_c0_seq3_m.69137	-0.37992	0.0102209	0.0121693	0.041667
comp2253875_c0_seq1_m.43271	0.33557	0.0102856	0.0121995	0.0417705
comp2246119_c0_seq1_m.34306	0.346458	0.010481	0.0123295	0.0422157
comp2248808_c0_seq2_m.37043	-0.888232	0.0105099	0.0123295	0.0422157
comp1876805_c0_seq1_m.2339	0.264943	0.0105434	0.0123295	0.0422157
comp2272433_c0_seq1_m.73197	0.287675	0.0105539	0.0123295	0.0422157
comp2263658_c0_seq3_m.57592	-0.335045	0.0107859	0.0125534	0.0429821
comp2264743_c0_seq3_m.59295	-0.235304	0.0109984	0.0126872	0.0434401
comp2277203_c0_seq4_m.84565	0.45055	0.0110152	0.0126872	0.0434401
comp2271539_c0_seq2_m.71326	0.308063	0.0110233	0.0126872	0.0434401
comp2272437_c1_seq1_m.73204	0.381462	0.0111195	0.0127126	0.0435273
comp2277977_c1_seq3_m.87126	-0.268864	0.0111273	0.0127126	0.0435273
comp2268964_c0_seq1_m.66515	-0.416695	0.0113986	0.012975	0.0444255
comp2201786_c0_seq1_m.13247	0.875057	0.0115591	0.0131096	0.0448866
comp2276202_c0_seq3_m.81780	0.41708	0.0116133	0.0131232	0.0449331
comp2273845_c0_seq2_m.76206	0.336529	0.0117938	0.0132788	0.0454658
comp2237757_c0_seq1_m.27251	0.230327	0.0119442	0.0133997	0.0458797
comp2264888_c0_seq4_m.59493	0.633132	0.012005	0.0134179	0.0459422
comp2247229_c0_seq1_m.35389	0.256097	0.012055	0.0134179	0.0459422
comp2258554_c1_seq2_m.49570	-0.479063	0.0120901	0.0134179	0.0459422
comp2277815_c1_seq2_m.86535	0.832789	0.0121909	0.0134817	0.0461607
comp2269611_c0_seq1_m.67728	0.316693	0.0123875	0.0136506	0.0467388
comp2273204_c0_seq26_m.74869	-0.299829	0.012489	0.0137138	0.0469552
comp2257693_c0_seq3_m.48359	0.22275	0.0125742	0.0137588	0.0471092
comp2268336_c1_seq1_m.65474	0.389338	0.0127491	0.0139011	0.0475967
comp2243933_c0_seq1_m.32211	-0.370306	0.0128452	0.013957	0.0477878
comp2261876_c0_seq1_m.54865	-0.36946	0.0129766	0.014044	0.0480857
comp2266801_c0_seq2_m.62707	0.251476	0.0130165	0.014044	0.0480857
comp2275270_c0_seq2_m.79424	0.317602	0.0130609	0.014044	0.0480857
gnl_Pdu_trscr_assembly_1_1986_m.5697	-0.342587	0.0131096	0.0140478	0.0480987
comp2265494_c0_seq1_m.60519	0.585348	0.0132108	0.0141076	0.0483035
comp1785956_c0_seq1_m.2259	0.503565	0.0132764	0.0141291	0.0483772
comp2257487_c0_seq1_m.48064	0.213881	0.0134046	0.0141346	0.0483961
gnl_Pdu_trscr_assembly_1_20144_m.60515	0.452694	0.0134243	0.0141346	0.0483961
comp2276634_c1_seq3_m.82935	0.435984	0.0134413	0.0141346	0.0483961
comp2277282_c0_seq11_m.84762	0.328911	0.0134636	0.0141346	0.0483961
comp2273193_c0_seq1_m.74830	-0.502802	0.0135631	0.0141911	0.0485896
comp2278422_c0_seq1_m.89011	0.339552	0.0136583	0.0142428	0.0487666
comp2277313_c0_seq3_m.84866	0.491037	0.0137531	0.0142937	0.0489407
comp2265471_c0_seq5_m.60488	0.284496	0.0139219	0.0143988	0.0493007
comp2231610_c0_seq1_m.23229	0.317501	0.0139626	0.0143988	0.0493007
comp2278536_c1_seq38_m.89884	-0.388974	0.0140134	0.0143988	0.0493007
comp1926910_c0_seq1_m.3122	-0.224367	0.0140396	0.0143988	0.0493007
comp2272724_c0_seq1_m.73818	-0.220057	0.0141583	0.0144728	0.0495539
comp2272371_c0_seq1_m.73054	-0.258384	0.0145765	0.0148047	0.0506905
comp2271871_c0_seq8_m.72023	0.332638	0.0145783	0.0148047	0.0506905
comp2270828_c0_seq11_m.69939	-0.387937	0.0147054	0.0148607	0.050882
comp2263787_c0_seq3_m.57874	0.346632	0.014729	0.0148607	0.050882
comp2272863_c1_seq5_m.74143	-0.217783	0.0149999	0.0150036	0.0513716
comp2274912_c0_seq4_m.78634	-0.217078	0.0150284	0.0150036	0.0513716
comp1916779_c0_seq1_m.2944	-0.270454	0.0150761	0.0150036	0.0513716
comp2277374_c0_seq2_m.85051	0.435922	0.0150938	0.0150036	0.0513716
comp2270220_c0_seq1_m.68776	0.554063	0.0151121	0.0150036	0.0513716
comp2269814_c0_seq1_m.68069	0.255253	0.0152299	0.015062	0.0515714
comp2139115_c0_seq1_m.6894	-0.78935	0.0152678	0.015062	0.0515714
comp2271535_c0_seq1_m.71319	0.27622	0.0153587	0.0151036	0.051714
comp2268340_c1_seq1_m.65478	0.296814	0.0158151	0.0154819	0.053009
comp1335339_c0_seq2_m.1954	0.326803	0.0158429	0.0154819	0.053009
comp2262197_c0_seq1_m.55346	0.48989	0.016007	0.0155932	0.0533901
comp2272807_c0_seq4_m.74003	-0.252123	0.0164145	0.0159402	0.0545783
comp2262360_c0_seq1_m.55644	-0.584437	0.0164848	0.0159586	0.0546412
comp2275625_c0_seq11_m.80264	-0.512962	0.0168548	0.0162661	0.0556942
comp2143334_c0_seq2_m.7649	0.28028	0.0169246	0.0162829	0.0557515
comp2278238_c0_seq6_m.88188	0.279732	0.0170471	0.0163502	0.055982
comp2254568_c0_seq1_m.44123	-0.278483	0.0175321	0.016721	0.0572517
comp2274043_c0_seq7_m.76739	-0.40603	0.0175414	0.016721	0.0572517
comp2274783_c0_seq9_m.78326	-0.449961	0.0179446	0.0170182	0.0582693
comp2259918_c0_seq1_m.51762	0.251219	0.0179689	0.0170182	0.0582693
comp2257585_c0_seq1_m.48216	0.290058	0.018072	0.0170182	0.0582693
comp2263347_c0_seq2_m.57195	0.286107	0.0180722	0.0170182	0.0582693
gnl_Pdu_trscr_assembly_1_998_m.15062	-0.205316	0.0182045	0.017091	0.0585185
comp2259349_c0_seq2_m.50877	-0.377604	0.0183768	0.0172007	0.0588943
comp2268906_c0_seq4_m.66401	-0.263822	0.0189627	0.0176067	0.0602842
comp1953077_c0_seq1_m.3483	-0.357483	0.0189661	0.0176067	0.0602842
comp2273249_c0_seq4_m.74967	-0.369667	0.0190488	0.0176067	0.0602842
comp2258349_c0_seq1_m.49322	-0.373107	0.0190834	0.0176067	0.0602842
comp2276940_c0_seq2_m.83802	-0.556808	0.0191401	0.0176067	0.0602842
comp2267169_c0_seq1_m.63315	0.227864	0.0191504	0.0176067	0.0602842
gnl_Pdu_trscr_assembly_1_1644_m.62862	-0.239215	0.0196013	0.017968	0.0615215
comp2257975_c0_seq1_m.48752	0.20522	0.0197812	0.0180796	0.0619037
comp2272842_c0_seq2_m.74081	-0.481501	0.0198555	0.0180943	0.0619538
comp2277388_c0_seq8_m.85092	-0.458858	0.0200111	0.0181827	0.0622566
comp2280536_c0_seq1_m.91231	0.35765	0.0204577	0.018482	0.0632814
gnl_Pdu_trscr_assembly_1_7327_m.81715	-0.232434	0.0205531	0.018482	0.0632814
comp2261121_c0_seq1_m.53764	0.234923	0.0205627	0.018482	0.0632814
comp2271916_c0_seq1_m.72122	0.266935	0.0205783	0.018482	0.0632814
comp2263771_c0_seq2_m.57851	0.218425	0.0206617	0.0185034	0.0633546
comp2258619_c0_seq2_m.49656	0.29563	0.020764	0.0185416	0.0634854
comp2278623_c0_seq6_m.90693	0.23076	0.0209887	0.0186886	0.0639886
comp1194322_c0_seq2_m.793	0.22571	0.0213802	0.0189827	0.0649958
comp2251594_c0_seq1_m.40214	0.319339	0.021523	0.0190551	0.0652436
gnl_Pdu_trscr_assembly_1_9334_m.28552	-0.352568	0.0217547	0.0192055	0.0657585
comp2267558_c0_seq1_m.64038	-0.22382	0.0219646	0.0193359	0.0662049
comp2263768_c0_seq2_m.57843	-0.340061	0.022065	0.019343	0.0662293
comp2277617_c1_seq7_m.85877	-0.244353	0.0221167	0.019343	0.0662293
comp2277413_c0_seq4_m.85165	-0.238659	0.0221594	0.019343	0.0662293
comp2274474_c0_seq5_m.77718	-0.467719	0.0229732	0.0199972	0.0684692
comp2252746_c0_seq1_m.41651	-0.276647	0.0231117	0.0200615	0.0686895
comp2254668_c0_seq2_m.44236	0.286279	0.02336	0.0202206	0.0692342
comp2276741_c0_seq2_m.83166	0.240835	0.0237433	0.0204144	0.0698976
comp2273911_c0_seq8_m.76361	0.363617	0.0237563	0.0204144	0.0698976
comp2264066_c0_seq3_m.58370	-0.379477	0.0238167	0.0204144	0.0698976
comp2279748_c0_seq1_m.91174	0.30777	0.0239162	0.0204144	0.0698976
comp2267968_c0_seq2_m.64758	-0.386285	0.0239388	0.0204144	0.0698976
comp2250533_c0_seq1_m.39039	-0.250507	0.023978	0.0204144	0.0698976
comp2276747_c1_seq2_m.83192	0.375966	0.0244001	0.0206435	0.0706822
comp2260058_c0_seq1_m.51934	0.384707	0.0244481	0.0206435	0.0706822
comp2236007_c0_seq2_m.26049	0.374879	0.0244582	0.0206435	0.0706822
comp2252059_c0_seq1_m.40786	0.280048	0.0245129	0.0206435	0.0706822
comp2266701_c0_seq3_m.62512	-0.613024	0.0249467	0.0209521	0.0717387
comp2269201_c0_seq1_m.67004	-0.59841	0.0256162	0.0214438	0.0734223
comp2279615_c0_seq1_m.91158	-0.178217	0.0256702	0.0214438	0.0734223
comp2278012_c0_seq11_m.87235	-0.557781	0.0260722	0.0217212	0.0743721
comp2276593_c0_seq3_m.82791	0.237031	0.0262603	0.0218062	0.074663
comp2270996_c0_seq5_m.70236	0.544867	0.0263145	0.0218062	0.074663
comp2251806_c0_seq1_m.40480	0.20965	0.026475	0.0218808	0.0749186
comp2274301_c0_seq6_m.77327	0.315047	0.026902	0.0221747	0.0759249
comp2248226_c3_seq1_m.36365	0.265281	0.0270657	0.0222507	0.0761851
comp2277995_c0_seq1_m.87177	-0.296644	0.0273452	0.0224211	0.0767687
comp2277312_c0_seq10_m.84862	0.279331	0.0274976	0.0224867	0.0769932
comp2271124_c0_seq1_m.70454	0.425881	0.0276574	0.0225581	0.0772376
comp2269906_c0_seq2_m.68214	0.25559	0.0285269	0.0231683	0.0793268
comp2275266_c0_seq21_m.79421	-0.236608	0.028557	0.0231683	0.0793268
comp2274693_c0_seq1_m.78142	0.232858	0.0286292	0.0231683	0.0793268
comp2272691_c0_seq4_m.73750	-0.471552	0.0290078	0.0234137	0.0801671
comp2273645_c0_seq11_m.75781	0.26549	0.0295253	0.023718	0.081209
comp2206512_c0_seq1_m.14012	0.254834	0.0296788	0.023718	0.081209
comp1769718_c0_seq1_m.2239	0.416085	0.0296841	0.023718	0.081209
comp2272583_c0_seq2_m.73488	-0.189405	0.0296901	0.023718	0.081209
comp2278031_c0_seq2_m.87291	0.221341	0.0304414	0.0242558	0.0830505
comp2272087_c1_seq4_m.72458	-0.181842	0.0306558	0.0243642	0.0834215
comp2276314_c0_seq1_m.82075	0.380466	0.0317891	0.0252004	0.0862848
comp2268417_c0_seq2_m.65592	-0.507356	0.0319847	0.0252909	0.0865946
comp2275508_c1_seq3_m.80009	-0.463888	0.0321324	0.0253432	0.0867737
gnl_Pdu_trscr_assembly_1_15577_m.47320	0.212156	0.0322602	0.0253796	0.0868984
comp2273900_c0_seq1_m.76336	0.234877	0.0326484	0.0255207	0.0873814
comp2269593_c0_seq3_m.67692	0.200931	0.0326717	0.0255207	0.0873814
gnl_Pdu_trscr_assembly_1_19681_m.92605	0.311265	0.0326859	0.0255207	0.0873814
comp2271944_c0_seq11_m.72172	0.27983	0.033065	0.025752	0.0881733
comp2261058_c0_seq1_m.53667	0.240688	0.0335156	0.0259948	0.0890045
comp2276825_c0_seq1_m.83424	0.213254	0.033544	0.0259948	0.0890045
comp2277083_c0_seq3_m.84173	-0.290416	0.0337778	0.0261108	0.0894019
comp2239935_c0_seq1_m.28757	-0.204257	0.0341319	0.0263191	0.090115
comp2275701_c1_seq1_m.80440	0.355756	0.0342725	0.0263621	0.0902623
comp2253561_c0_seq1_m.42779	-0.298312	0.0345483	0.0265086	0.090764
comp2250470_c0_seq1_m.38949	0.297877	0.0348451	0.0265827	0.0910176
comp2278605_c1_seq8_m.90480	-0.449557	0.0348698	0.0265827	0.0910176
comp2257131_c0_seq2_m.47590	0.338519	0.0349015	0.0265827	0.0910176
comp1194343_c0_seq1_m.800	-0.169999	0.035207	0.0267451	0.0915736
comp2270458_c0_seq1_m.69251	-0.317264	0.0352868	0.0267451	0.0915736
comp2251346_c0_seq1_m.39994	-0.264424	0.035938	0.0271724	0.0930367
comp2269029_c1_seq11_m.66661	-0.205745	0.0361138	0.027239	0.0932648
comp2277815_c0_seq5_m.86532	0.614039	0.0374197	0.028091	0.0961818
comp2271675_c0_seq2_m.71655	0.430983	0.0374675	0.028091	0.0961818
comp2278010_c1_seq9_m.87231	-0.322917	0.0375145	0.028091	0.0961818
comp2254426_c0_seq1_m.43954	-0.358019	0.0377229	0.0281791	0.0964837
comp2270148_c0_seq3_m.68661	0.209188	0.0378596	0.0282134	0.0966011
comp2269773_c0_seq6_m.68002	0.166519	0.0382024	0.0284007	0.0972423
comp2273647_c0_seq2_m.75785	-0.590968	0.0384549	0.0285202	0.0976516
comp2277399_c0_seq2_m.85129	-0.220927	0.0388397	0.0287203	0.0983368
comp2262362_c0_seq1_m.55645	0.244991	0.0389096	0.0287203	0.0983368
comp2268194_c0_seq1_m.65186	-0.259774	0.0391799	0.0288377	0.0987386
comp2275068_c1_seq1_m.78996	0.240373	0.0393448	0.0288377	0.0987386
comp2258014_c0_seq1_m.48797	-0.744131	0.039347	0.0288377	0.0987386
comp2228369_c0_seq1_m.21627	-0.227965	0.0397171	0.0290405	0.099433
comp2269023_c0_seq1_m.66650	0.159671	0.0399757	0.0290886	0.0995976
comp2139380_c0_seq1_m.6935	0.348155	0.0400232	0.0290886	0.0995976
comp1888169_c0_seq2_m.2479	0.689634	0.0400637	0.0290886	0.0995976

## Sheet: IM_NM vs M_NM_Male
	logFC	p.mod	q.mod	adjusted.pvalue
comp2242933_c0_seq1_m.31351	1.89332	4.02e-07	0.00015586	0.0004276
comp2272698_c0_seq4_m.73763	1.12944	1.22e-06	0.000237034	0.000650301
comp2247988_c0_seq1_m.36173	-1.07366	2.41e-06	0.000273619	0.000750671
gene17_m.92593	1.69181	2.82e-06	0.000273619	0.000750671
comp2256041_c0_seq1_m.46046	1.05864	4.24e-06	0.000329237	0.000903258
comp2272319_c0_seq24_m.72950	1.73809	7.34e-06	0.000329675	0.00090446
comp2271994_c0_seq2_m.72269	-1.05767	7.39e-06	0.000329675	0.00090446
comp2232805_c0_seq1_m.23974	0.796347	7.6e-06	0.000329675	0.00090446
comp2232909_c0_seq1_m.24034	1.83782	7.65e-06	0.000329675	0.00090446
comp2277282_c0_seq11_m.84762	0.897884	9.29e-06	0.000360364	0.000988656
gnl_Pdu_trscr_assembly_1_5530_m.58454	-0.738467	1.04e-05	0.000368008	0.00100963
comp2262137_c0_seq4_m.55246	-1.15291	1.31e-05	0.000423276	0.00116125
comp2278077_c0_seq3_m.87468	1.01938	1.96e-05	0.000584842	0.00160451
comp2262137_c0_seq3_m.92268	-1.67268	2.86e-05	0.000793643	0.00217735
comp2254641_c1_seq1_m.44200	-0.69213	3.09e-05	0.000799923	0.00219458
comp2278062_c0_seq4_m.87412	0.797244	3.4e-05	0.000823157	0.00225832
comp2275107_c0_seq4_m.79080	-0.56322	3.73e-05	0.000851108	0.00233501
comp2276768_c0_seq2_m.83249	0.783335	3.98e-05	0.000857017	0.00235122
comp2263822_c0_seq1_m.57945	0.709028	4.56e-05	0.000929759	0.00255079
comp2266280_c0_seq1_m.61789	0.704036	4.79e-05	0.000929759	0.00255079
comp2234282_c0_seq1_m.24908	0.943514	5.39e-05	0.000996084	0.00273275
comp2275110_c1_seq5_m.79090	0.795402	5.95e-05	0.00104805	0.00287533
comp2254520_c0_seq1_m.44059	-0.614514	6.66e-05	0.00108426	0.00297467
comp2275841_c0_seq1_m.80783	-0.712185	7.22e-05	0.00108426	0.00297467
gnl_Pdu_trscrassembly_1_16296_m.13041	-0.71172	7.23e-05	0.00108426	0.00297467
comp2274581_c1_seq21_m.92631	-0.646744	7.27e-05	0.00108426	0.00297467
comp2272961_c0_seq1_m.74370	0.79087	7.98e-05	0.0011014	0.00302167
comp2256095_c0_seq1_m.46136	-0.609483	8.52e-05	0.0011014	0.00302167
comp2261623_c0_seq1_m.54431	-0.668013	8.7e-05	0.0011014	0.00302167
comp2272233_c0_seq1_m.72760	-0.542808	8.78e-05	0.0011014	0.00302167
comp2277945_c0_seq2_m.86985	-1.13239	8.8e-05	0.0011014	0.00302167
comp2276277_c0_seq18_m.81972	0.629074	9.81e-05	0.00118916	0.00326246
comp2265897_c0_seq5_m.61166	0.716178	0.000114935	0.00135075	0.00370578
comp2266507_c0_seq10_m.62138	-0.52171	0.000123649	0.00135923	0.00372903
comp2275822_c0_seq10_m.80745	-0.817844	0.000125668	0.00135923	0.00372903
comp2254167_c0_seq1_m.43587	0.722696	0.00012617	0.00135923	0.00372903
comp2248821_c1_seq2_m.37050	-0.520932	0.000146516	0.0015225	0.00417697
comp2252285_c0_seq2_m.41107	-0.531751	0.000149178	0.0015225	0.00417697
comp2269185_c0_seq2_m.66963	-0.596634	0.000166219	0.00163305	0.00448026
comp2267732_c0_seq2_m.64331	-0.60593	0.000172178	0.00163305	0.00448026
comp2243258_c0_seq1_m.31584	-0.652898	0.000172642	0.00163305	0.00448026
comp2237468_c0_seq1_m.27022	-1.11126	0.000179948	0.00166164	0.00455869
comp2257905_c0_seq1_m.48664	-0.606316	0.000196467	0.00177198	0.00486142
comp2261399_c0_seq2_m.54155	-1.07067	0.000209693	0.0018144	0.0049778
comp2274541_c0_seq1_m.77862	-1.11764	0.000214137	0.0018144	0.0049778
comp2204672_c0_seq1_m.13711	-0.512766	0.000215206	0.0018144	0.0049778
comp2272087_c1_seq4_m.72458	-0.449689	0.000240649	0.00195429	0.00536158
comp2276498_c2_seq1_m.82546	-0.845512	0.000241876	0.00195429	0.00536158
comp2264838_c0_seq3_m.59436	-1.04027	0.000260481	0.00206166	0.00565616
comp2276426_c0_seq2_m.82339	-0.718789	0.000281844	0.00216906	0.00595079
comp1958245_c0_seq1_m.3536	-0.555821	0.000285235	0.00216906	0.00595079
comp2254477_c0_seq1_m.44015	0.483375	0.000308651	0.00230032	0.00631091
comp2277815_c1_seq2_m.86535	1.00454	0.000314359	0.00230032	0.00631091
comp2268964_c0_seq1_m.66515	-0.448907	0.000320887	0.00230461	0.00632267
gnl_Pdu_trscrassembly_1_16061_m.43221	-0.616875	0.000332434	0.00234412	0.00643108
comp2278422_c0_seq1_m.89011	0.517945	0.000345337	0.00237059	0.0065037
comp2263612_c1_seq1_m.57550	-0.413684	0.000349286	0.00237059	0.0065037
comp2263873_c0_seq9_m.58029	-1.32826	0.000354525	0.00237059	0.0065037
comp2272547_c0_seq4_m.73421	-0.539589	0.00036448	0.00238168	0.00653411
comp2281676_c0_seq1_m.91255	0.889531	0.000368465	0.00238168	0.00653411
comp2265656_c0_seq3_m.60780	-0.491439	0.000389266	0.00244528	0.0067086
comp2256220_c0_seq1_m.46316	-0.687719	0.000390915	0.00244528	0.0067086
comp1916779_c0_seq1_m.2944	-0.438203	0.000414478	0.00255152	0.00700008
comp2270876_c0_seq2_m.70018	-0.596318	0.000432622	0.00260909	0.00715802
comp2271350_c0_seq18_m.70898	0.543588	0.00043771	0.00260909	0.00715802
comp2275662_c1_seq10_m.80344	-0.403977	0.000444012	0.00260909	0.00715802
comp2246514_c1_seq1_m.34691	-0.500838	0.000452802	0.00262103	0.00719076
comp2278587_c0_seq14_m.90327	-0.521763	0.000472853	0.00269684	0.00739876
comp2263277_c0_seq1_m.57091	-0.453151	0.000487952	0.00274262	0.00752436
comp2277680_c0_seq25_m.86056	-0.631264	0.000516468	0.00283583	0.00778007
comp2275270_c0_seq2_m.79424	0.403657	0.000519159	0.00283583	0.00778007
comp2273038_c0_seq3_m.74522	-0.61841	0.000527676	0.00284232	0.00779788
comp1781461_c0_seq1_m.2253	-0.585235	0.000582031	0.00309216	0.0084833
comp2261368_c1_seq1_m.54120	-0.408814	0.000611927	0.00320705	0.00879851
comp1945561_c0_seq2_m.3380	-0.687002	0.000683628	0.00353506	0.00969841
comp2275445_c0_seq2_m.79869	-0.501952	0.000752176	0.00379971	0.0104245
comp2276035_c1_seq16_m.81307	-0.498989	0.000755803	0.00379971	0.0104245
comp2279523_c0_seq1_m.91136	-0.462464	0.000768986	0.00379971	0.0104245
comp2261971_c0_seq1_m.55022	-0.514822	0.000773997	0.00379971	0.0104245
comp2271649_c0_seq1_m.71599	-0.66394	0.000793714	0.00382054	0.0104816
comp2254675_c0_seq1_m.44244	-0.375277	0.000806452	0.00382054	0.0104816
isotig10568_m.92324	-1.24409	0.000807795	0.00382054	0.0104816
comp2264302_c0_seq2_m.58699	-0.686407	0.0008476	0.0038701	0.0106176
comp2265768_c0_seq2_m.60943	-0.732474	0.000850755	0.0038701	0.0106176
comp2277088_c0_seq32_m.84183	-0.469037	0.000851891	0.0038701	0.0106176
comp2276442_c0_seq1_m.82386	-0.406232	0.000862515	0.0038701	0.0106176
comp2263115_c0_seq2_m.56831	0.358841	0.000868167	0.0038701	0.0106176
comp2268869_c0_seq6_m.66344	-0.775026	0.000885812	0.00390389	0.0107103
comp2273257_c0_seq9_m.74986	1.18683	0.000904686	0.00392212	0.0107603
gnl_Pdu_trscrassembly_1_1514_m.69841	0.347052	0.000917518	0.00392212	0.0107603
comp2275523_c0_seq29_m.80039	0.438158	0.000925353	0.00392212	0.0107603
comp2252847_c0_seq1_m.41763	0.410761	0.000937502	0.00392212	0.0107603
comp2262465_c0_seq5_m.55795	-0.996907	0.000951245	0.00392212	0.0107603
comp2226643_c0_seq1_m.20830	-0.403368	0.000962159	0.00392212	0.0107603
comp2276461_c0_seq7_m.82444	-0.463998	0.000963842	0.00392212	0.0107603
comp2277815_c0_seq5_m.86532	0.791691	0.000986506	0.00392212	0.0107603
comp2277972_c0_seq17_m.87106	0.446791	0.000993496	0.00392212	0.0107603
comp2239691_c0_seq1_m.28548	-0.81017	0.000993972	0.00392212	0.0107603
comp2274783_c0_seq9_m.78326	-0.49142	0.00100119	0.00392212	0.0107603
comp2268892_c0_seq1_m.66381	-0.898743	0.00101809	0.00394124	0.0108128
comp2263291_c0_seq2_m.57114	0.531518	0.0010343	0.00394124	0.0108128
comp2278509_c0_seq8_m.89637	-0.374618	0.00103656	0.00394124	0.0108128
comp2278366_c0_seq5_m.88731	-0.448054	0.00106231	0.00399994	0.0109738
comp2268906_c0_seq4_m.66401	-0.346539	0.00109718	0.0040613	0.0111421
comp2266171_c0_seq1_m.61557	0.547314	0.00109955	0.0040613	0.0111421
comp2277908_c1_seq11_m.86865	0.513021	0.00118009	0.00431765	0.0118454
comp2278554_c0_seq4_m.90013	-0.582073	0.00122703	0.00444743	0.0122015
comp2221095_c0_seq1_m.18558	-0.486516	0.0012824	0.00460509	0.012634
comp2277869_c0_seq29_m.86707	0.434018	0.00129492	0.0046074	0.0126404
comp2254470_c0_seq1_m.44006	-0.376871	0.00132222	0.00465218	0.0127632
comp2278474_c0_seq1_m.89294	-0.528909	0.00133251	0.00465218	0.0127632
gnl_Pdu_trscrassembly_1_14638_m.60097	-0.496873	0.00134678	0.00465218	0.0127632
comp2266692_c0_seq1_m.62504	0.572077	0.00135549	0.00465218	0.0127632
comp2273017_c0_seq1_m.74484	-0.363908	0.00140734	0.00478775	0.0131352
comp2269230_c0_seq2_m.67055	-0.495247	0.00147557	0.00497621	0.0136522
comp2242282_c0_seq1_m.30761	-0.461442	0.00148951	0.00497994	0.0136624
comp2258554_c0_seq1_m.49568	-0.470062	0.0015042	0.00498607	0.0136792
comp2279567_c0_seq1_m.91146	0.567143	0.00155986	0.00512676	0.0140652
comp2269060_c1_seq1_m.66719	-0.791496	0.00161406	0.00526029	0.0144316
comp2272254_c0_seq4_m.72822	-0.683299	0.00167929	0.00542727	0.0148897
comp2224448_c0_seq1_m.19874	-0.293535	0.0017397	0.00557605	0.0152978
comp2276523_c0_seq2_m.82609	0.393633	0.00179844	0.00569612	0.0156273
comp2278054_c0_seq40_m.87392	-0.559972	0.0018091	0.00569612	0.0156273
comp2277933_c1_seq7_m.86947	-0.660859	0.00183356	0.00569612	0.0156273
comp2269580_c0_seq1_m.67656	0.44533	0.00184293	0.00569612	0.0156273
comp2269321_c1_seq1_m.67212	-0.363217	0.0018506	0.00569612	0.0156273
comp2276750_c0_seq1_m.83194	0.579218	0.00187163	0.0057155	0.0156804
comp2252506_c0_seq1_m.41372	-0.346651	0.0019072	0.00574527	0.0157621
comp2261018_c0_seq2_m.53614	-0.415438	0.00191859	0.00574527	0.0157621
comp2278536_c1_seq38_m.89884	-0.390144	0.00192582	0.00574527	0.0157621
comp2264743_c0_seq3_m.59295	-0.325344	0.00196182	0.00580385	0.0159228
comp2266503_c0_seq6_m.62129	-0.506599	0.00197539	0.00580385	0.0159228
comp2271225_c0_seq5_m.70641	-0.78663	0.00202059	0.00586343	0.0160863
comp2263896_c0_seq3_m.58065	0.432135	0.00204213	0.00586343	0.0160863
gnl_Pdu_trscrassembly_1_20792_m.71829	0.336424	0.00206535	0.00586343	0.0160863
comp2278362_c0_seq1_m.88712	-0.381301	0.00208291	0.00586343	0.0160863
comp2278333_c0_seq10_m.88591	-0.426837	0.00208774	0.00586343	0.0160863
comp1926910_c0_seq1_m.3122	-0.314527	0.00211474	0.00586343	0.0160863
comp2278630_c0_seq8_m.90809	-0.463368	0.00214196	0.00586343	0.0160863
comp2275312_c0_seq8_m.79518	-0.533303	0.00214459	0.00586343	0.0160863
comp2277605_c1_seq7_m.85828	0.473198	0.00215813	0.00586343	0.0160863
comp2277114_c1_seq1_m.84278	0.335124	0.00216392	0.00586343	0.0160863
comp2265326_c0_seq3_m.60204	-0.688111	0.00216598	0.00586343	0.0160863
gnl_Pdu_trscrassembly_1_326_m.78835	-0.436072	0.00218868	0.00586343	0.0160863
comp2276648_c1_seq1_m.82962	-0.439507	0.00219221	0.00586343	0.0160863
gnl_Pdu_trscrassembly_1_9334_m.28552	-0.394302	0.0022328	0.00588542	0.0161466
comp2231610_c0_seq1_m.23229	0.390161	0.00224092	0.00588542	0.0161466
comp2277005_c0_seq3_m.83943	0.456824	0.00224596	0.00588542	0.0161466
comp2277132_c1_seq1_m.84335	0.52735	0.00232593	0.00605409	0.0166093
comp2278589_c0_seq3_m.90346	-0.385092	0.00239221	0.0061495	0.0168711
gnl_Pdu_trscrassembly_1_7327_m.81715	-0.317261	0.0023943	0.0061495	0.0168711
comp2257939_c0_seq1_m.48703	-0.361189	0.00241341	0.00615779	0.0168939
comp2272118_c0_seq11_m.72524	0.295972	0.00250957	0.00633383	0.0173768
comp1965369_c0_seq1_contamination_m.3664	0.654374	0.0025282	0.00633383	0.0173768
comp2273417_c0_seq5_m.75297	-0.561478	0.0025314	0.00633383	0.0173768
comp2189372_c0_seq1_m.11219	-0.301785	0.00259198	0.00642839	0.0176362
comp2275542_c0_seq9_m.80087	-0.567315	0.00260234	0.00642839	0.0176362
comp2271425_c0_seq4_m.71034	-0.329122	0.00263466	0.00646705	0.0177423
comp2206512_c0_seq1_m.14012	0.416858	0.00269954	0.00658461	0.0180648
comp2256245_c0_seq1_m.46340	-0.415767	0.0027796	0.00665437	0.0182562
comp2271539_c0_seq2_m.71326	0.29888	0.00278178	0.00665437	0.0182562
comp2274474_c0_seq5_m.77718	-0.638221	0.00284179	0.00665437	0.0182562
comp2276159_c1_seq5_m.81677	-0.344753	0.00285036	0.00665437	0.0182562
comp2277722_c0_seq17_m.86189	-0.370101	0.00285831	0.00665437	0.0182562
comp2260103_c0_seq1_m.51994	-0.338944	0.00286146	0.00665437	0.0182562
comp2276413_c0_seq21_m.82313	-0.342986	0.00288135	0.00665437	0.0182562
comp2269060_c0_seq1_m.66718	-0.605836	0.00289562	0.00665437	0.0182562
comp1194106_c0_seq1_m.742	0.303415	0.0028979	0.00665437	0.0182562
comp1194362_c0_seq2_m.804	0.321488	0.00289972	0.00665437	0.0182562
comp2214845_c0_seq1_m.16111	0.453476	0.0030176	0.0068514	0.0187967
comp2276871_c0_seq8_m.83582	0.567	0.00302091	0.0068514	0.0187967
comp2280591_c0_seq1_m.91233	0.952591	0.00308383	0.00695344	0.0190767
comp2277203_c0_seq4_m.84565	0.516146	0.00311864	0.00699128	0.0191805
comp2263661_c0_seq1_m.57595	-0.299902	0.00318613	0.00710153	0.019483
comp2261428_c0_seq1_m.54200	-0.279517	0.00324242	0.00710281	0.0194865
comp1244797_c0_seq1_m.1278	0.323555	0.00328935	0.00710281	0.0194865
comp2263667_c0_seq1_m.57601	0.592701	0.00329423	0.00710281	0.0194865
gnl_Pdu_trscrassembly_1_998_m.15062	-0.281731	0.0033019	0.00710281	0.0194865
comp2254568_c0_seq1_m.44123	-0.412255	0.00330306	0.00710281	0.0194865
comp2275358_c0_seq1_m.79627	-0.364053	0.00331151	0.00710281	0.0194865
comp2269627_c0_seq2_m.67749	0.264836	0.0033149	0.00710281	0.0194865
comp2279536_c0_seq1_m.91140	-0.339545	0.00337117	0.00718017	0.0196987
comp2254496_c0_seq2_m.44030	-0.312278	0.00338803	0.00718017	0.0196987
comp2229729_c0_seq1_m.22264	0.38498	0.00347498	0.00732441	0.0200945
comp2268473_c1_seq1_m.65668	0.765517	0.00361424	0.0075625	0.0207476
comp2270404_c0_seq3_m.69137	-0.442014	0.00362694	0.0075625	0.0207476
comp2202068_c0_seq1_m.13304	-0.3107	0.00366515	0.00760131	0.0208541
comp2269532_c0_seq13_m.67583	-0.550279	0.0037529	0.00774189	0.0212398
comp2261379_c0_seq1_m.54133	-0.744536	0.00377532	0.00774695	0.0212537
comp2267209_c0_seq1_m.63399	-0.528603	0.00379651	0.00774942	0.0212605
comp2272519_c1_seq3_m.73361	-0.304941	0.00388808	0.0078444	0.021521
comp2224014_c0_seq1_m.19704	0.377565	0.00389028	0.0078444	0.021521
comp2254394_c0_seq2_m.43926	-0.311662	0.00390372	0.0078444	0.021521
comp2139115_c0_seq1_m.6894	-0.908813	0.00396352	0.00791454	0.0217135
comp2276936_c0_seq3_m.83786	0.951276	0.00397944	0.00791454	0.0217135
comp1226347_c0_seq1_m.1231	0.291764	0.00400328	0.00792133	0.0217321
comp2269611_c0_seq1_m.67728	0.36378	0.00415094	0.00817181	0.0224193
comp2261876_c0_seq1_m.54865	-0.318549	0.00421237	0.0082208	0.0225537
comp2252746_c0_seq1_m.41651	-0.343027	0.00421822	0.0082208	0.0225537
comp2232290_c0_seq2_m.23637	-0.940415	0.00426071	0.00826209	0.022667
comp2253856_c0_seq1_m.43254	-0.312782	0.00429694	0.00829089	0.022746
comp2273647_c0_seq2_m.75785	-0.670721	0.00434185	0.00833607	0.0228699
comp2268857_c0_seq2_m.66328	-0.322432	0.00439331	0.00836138	0.0229394
comp2252059_c0_seq1_m.40786	0.360601	0.00439815	0.00836138	0.0229394
comp2267634_c0_seq2_m.64174	-0.488794	0.00443938	0.00839859	0.0230414
comp2267172_c0_seq1_m.63318	0.342561	0.0045012	0.00845439	0.0231945
comp2275714_c2_seq1_m.80469	0.24681	0.00451892	0.00845439	0.0231945
comp2270797_c0_seq10_m.69872	-0.50657	0.00453427	0.00845439	0.0231945
comp2269171_c0_seq3_m.66933	0.659735	0.00456109	0.0084637	0.0232201
comp2263346_c1_seq31_m.57192	-0.312492	0.00459628	0.00848838	0.0232878
comp2271871_c0_seq8_m.72023	0.419867	0.00468865	0.00861794	0.0236432
comp1335339_c0_seq2_m.1954	0.301848	0.00474662	0.00868334	0.0238227
comp2275674_c1_seq1_m.80370	-0.583882	0.00484826	0.00882763	0.0242185
comp2272724_c0_seq1_m.73818	-0.278224	0.00489711	0.00886416	0.0243187
comp2270220_c0_seq1_m.68776	0.717848	0.00491403	0.00886416	0.0243187
gnl_Pdu_trscrassembly_1_16681_m.81096	-0.255714	0.00496809	0.00891001	0.0244445
comp2277977_c1_seq3_m.87126	-0.273646	0.0049854	0.00891001	0.0244445
comp2271535_c0_seq1_m.71319	0.330455	0.00514833	0.0090807	0.0249128
comp2278376_c0_seq1_m.88768	-0.416944	0.00516443	0.0090807	0.0249128
comp2262317_c0_seq2_m.55577	0.583973	0.00518868	0.0090807	0.0249128
comp2271413_c1_seq5_m.70995	-0.333749	0.00518946	0.0090807	0.0249128
comp2269326_c0_seq2_m.67220	-0.288911	0.00521373	0.0090807	0.0249128
comp2248226_c3_seq1_m.36365	0.300479	0.00522139	0.0090807	0.0249128
comp2247098_c0_seq1_m.35275	-0.675757	0.00531347	0.00919959	0.025239
comp2263691_c0_seq2_m.57661	-0.52848	0.00539576	0.00930054	0.025516
comp2274446_c0_seq19_m.77642	-0.295559	0.00544614	0.00931885	0.0255662
comp2276302_c0_seq1_m.82036	0.326794	0.00545444	0.00931885	0.0255662
comp2278031_c0_seq2_m.87291	0.309602	0.0054969	0.00932816	0.0255917
comp2275616_c0_seq2_m.80253	-0.471671	0.00550799	0.00932816	0.0255917
comp2264621_c0_seq1_m.59138	-0.519703	0.00556169	0.00937815	0.0257289
comp2273628_c0_seq6_m.75728	-0.453473	0.00570385	0.00957623	0.0262723
comp2243933_c0_seq1_m.32211	-0.439367	0.00579445	0.0096864	0.0265746
comp2258619_c0_seq2_m.49656	0.337933	0.00586986	0.00976157	0.0267808
comp2269297_c0_seq2_m.67181	0.554776	0.00588976	0.00976157	0.0267808
comp2272495_c0_seq1_m.73308	0.63744	0.00591604	0.00976341	0.0267858
comp2271257_c1_seq1_m.70699	-0.409525	0.00608303	0.00999646	0.0274252
comp2279445_c0_seq1_m.91120	-0.446838	0.00610917	0.00999706	0.0274268
comp2245721_c0_seq1_m.33844	0.426782	0.00621772	0.0101319	0.0277968
comp2274748_c1_seq11_m.78259	-0.266351	0.00633632	0.0102564	0.0281384
comp2276491_c0_seq8_m.82522	0.246256	0.006347	0.0102564	0.0281384
comp2265589_c0_seq2_m.60673	0.245096	0.0064007	0.0102731	0.0281841
comp2265735_c0_seq4_m.60895	-0.243351	0.00642345	0.0102731	0.0281841
comp2277313_c0_seq3_m.84866	0.5162	0.00643679	0.0102731	0.0281841
comp2278363_c0_seq7_m.88713	-0.302449	0.00660256	0.0104945	0.0287915
comp2266801_c0_seq2_m.62707	0.301582	0.00673942	0.0106683	0.0292683
comp2253149_c0_seq1_m.42245	0.497886	0.00679115	0.0107065	0.0293731
comp2260797_c0_seq1_m.53088	0.233317	0.00693489	0.0108888	0.0298734
comp2276940_c0_seq2_m.83802	-0.462677	0.0069914	0.0108919	0.0298819
comp2276741_c0_seq2_m.83166	0.250345	0.00699304	0.0108919	0.0298819
gnl_Pdu_trscrassembly_1_4228_m.63259	-0.550122	0.00704945	0.0108954	0.0298914
comp2275905_c0_seq4_m.80965	0.526755	0.00705146	0.0108954	0.0298914
comp2272863_c1_seq5_m.74143	-0.246466	0.00710962	0.0109417	0.0300184
comp2254426_c0_seq1_m.43954	-0.425572	0.00753641	0.0115527	0.0316946
comp2263768_c0_seq2_m.57843	-0.412489	0.00760735	0.0116155	0.031867
comp2258349_c0_seq1_m.49321	-0.259567	0.00764751	0.011631	0.0319096
comp2273900_c0_seq1_m.76336	0.252213	0.00777802	0.0117618	0.0322685
gnl_Pdu_trscrassembly_1_17807_m.62055	0.25987	0.0077952	0.0117618	0.0322685
comp2279297_c0_seq1_m.91091	0.260841	0.00785293	0.0117618	0.0322685
comp2263347_c0_seq2_m.57195	0.327383	0.00785483	0.0117618	0.0322685
comp2273595_c0_seq1_m.75667	-0.273123	0.00790385	0.0117897	0.032345
comp2280178_c0_seq1_m.91219	-0.699599	0.00795048	0.0118138	0.0324111
comp2256770_c0_seq1_m.46959	0.373188	0.00802398	0.0118775	0.0325859
comp2271319_c0_seq2_m.70822	0.346701	0.00808146	0.0118783	0.032588
gnl_Pdu_trscrassembly_1_2615_m.68529	0.266584	0.0080945	0.0118783	0.032588
comp2246119_c0_seq1_m.34306	0.360845	0.00811637	0.0118783	0.032588
comp2259823_c0_seq1_m.51564	0.358976	0.00822289	0.0119542	0.0327962
comp2262360_c0_seq1_m.55644	-0.669814	0.00824716	0.0119542	0.0327962
comp2278471_c0_seq8_m.89279	0.327889	0.00826069	0.0119542	0.0327962
comp2276966_c0_seq13_m.83854	-0.275997	0.00836471	0.0120597	0.0330857
comp2273865_c0_seq2_m.76255	0.44238	0.00842401	0.012087	0.0331605
comp2277475_c0_seq2_m.85365	-0.376607	0.00844596	0.012087	0.0331605
comp2274043_c0_seq7_m.76739	-0.429697	0.00867272	0.0123659	0.0339256
comp2274819_c0_seq2_m.78403	0.308431	0.0088013	0.0125032	0.0343025
comp2278133_c0_seq3_m.87701	0.336259	0.00888058	0.0125698	0.0344852
comp2241424_c0_seq3_m.29932	-0.423818	0.00894446	0.0126142	0.0346069
comp2275478_c0_seq7_m.79935	0.336235	0.00899296	0.0126366	0.0346685
comp2239022_c0_seq1_m.28102	0.605738	0.00913155	0.0127851	0.0350757
comp2277724_c0_seq10_m.86198	-0.361991	0.00918648	0.0128157	0.0351598
comp2253077_c0_seq1_m.42045	0.232336	0.0092467	0.0128535	0.0352634
comp2276743_c0_seq1_m.83169	0.28399	0.00930127	0.0128832	0.0353448
comp2270828_c0_seq11_m.69939	-0.356388	0.00940695	0.0129832	0.0356192
comp2264066_c0_seq3_m.58370	-0.394914	0.00974594	0.0134033	0.0367719
comp2278405_c0_seq22_m.88893	-0.653176	0.00978833	0.0134141	0.0368014
comp2274517_c0_seq1_m.77807	0.261492	0.00995878	0.0135842	0.0372681
comp2248808_c0_seq2_m.37043	-0.851181	0.00998252	0.0135842	0.0372681
comp2272299_c0_seq11_m.72914	-0.431904	0.0100865	0.0136777	0.0375247
gnl_Pdu_trscrassembly_1_1986_m.5697	-0.319312	0.0102987	0.0139167	0.0381804
comp2265386_c0_seq2_m.60299	0.517265	0.0104211	0.0140333	0.0385003
comp2274278_c0_seq6_m.77267	-0.363281	0.0105658	0.0141789	0.0388998
comp2259918_c0_seq1_m.51762	0.257641	0.0107019	0.0142967	0.0392227
comp2277933_c1_seq7_m.86946	-0.68828	0.0107451	0.0142967	0.0392227
comp2265883_c1_seq1_m.61140	0.565759	0.0107641	0.0142967	0.0392227
comp2254206_c0_seq1_m.43646	0.321643	0.0110484	0.014617	0.0401017
comp2257601_c0_seq2_m.48241	-0.22421	0.0110807	0.014617	0.0401017
comp2272807_c0_seq4_m.74003	-0.271154	0.0111188	0.0146175	0.040103
comp2141229_c0_seq1_m.7283	-0.311776	0.0112301	0.0147127	0.0403641
comp2250982_c0_seq1_m.39507	0.216231	0.0112862	0.0147127	0.0403641
comp2272433_c0_seq1_m.73197	0.286072	0.011305	0.0147127	0.0403641
comp2278238_c0_seq6_m.88188	0.3067	0.01141	0.0147807	0.0405507
comp2272371_c0_seq1_m.73054	-0.267048	0.0114335	0.0147807	0.0405507
comp2253217_c0_seq2_m.42336	-0.224584	0.011784	0.015145	0.0415503
comp2262927_c0_seq2_m.56544	0.294334	0.0117934	0.015145	0.0415503
comp2268874_c0_seq62_m.66354	-0.228727	0.0118365	0.0151502	0.0415643
comp1769718_c0_seq1_m.2239	0.322226	0.0119686	0.0152689	0.04189
comp2277501_c0_seq23_m.85461	-0.269927	0.0122456	0.015571	0.0427189
comp2268417_c0_seq2_m.65592	-0.503342	0.0126604	0.0160459	0.0440219
comp2143334_c0_seq2_m.7649	0.289406	0.0129649	0.0163783	0.0449338
comp2272124_c0_seq1_m.72532	-0.361826	0.0131837	0.0166006	0.0455437
comp2278306_c0_seq2_m.88465	-0.208173	0.0132852	0.0166743	0.0457459
comp2253516_c0_seq4_m.42708	-0.972817	0.0133633	0.0167182	0.0458664
comp2259221_c0_seq1_m.50687	0.368425	0.0136428	0.017013	0.0466751
comp2228369_c0_seq1_m.21627	-0.289361	0.0138047	0.0171597	0.0470775
comp2272876_c0_seq2_m.74167	0.335786	0.0138871	0.017207	0.0472074
comp2266680_c0_seq1_m.62479	-0.241027	0.0143697	0.0177482	0.0486921
comp2004487_c0_seq1_m.4269	0.66736	0.0146229	0.0180037	0.0493931
comp2273204_c0_seq26_m.74869	-0.340773	0.0148997	0.0182864	0.0501685
comp2237757_c0_seq1_m.27251	0.23082	0.0150523	0.0184154	0.0505225
comp2257070_c0_seq2_m.47512	-0.602038	0.0152486	0.018597	0.0510206
comp2201786_c0_seq1_m.13247	0.741505	0.0154929	0.0187929	0.0515581
comp2257633_c0_seq1_m.48279	-0.237129	0.0155062	0.0187929	0.0515581
comp2275508_c1_seq3_m.80009	-0.596964	0.0156493	0.0189072	0.0518719
comp2279748_c0_seq1_m.91174	0.304495	0.0158554	0.0190967	0.0523916
comp2262281_c0_seq3_m.55504	-0.609768	0.0160409	0.0191394	0.0525087
comp2259349_c0_seq2_m.50877	-0.423382	0.016043	0.0191394	0.0525087
comp2273193_c0_seq1_m.74830	-0.515612	0.0160791	0.0191394	0.0525087
comp1194322_c0_seq2_m.793	0.231054	0.0160882	0.0191394	0.0525087
comp2259363_c0_seq16_m.50888	0.270522	0.0163144	0.0192962	0.052939
comp1888169_c0_seq2_m.2479	0.769989	0.0163196	0.0192962	0.052939
comp2258349_c0_seq1_m.49322	-0.367569	0.0165179	0.0194713	0.0534195
comp2271755_c0_seq2_m.71808	0.297077	0.0168138	0.0197602	0.0542119
comp2277729_c0_seq10_m.86207	-0.563317	0.016938	0.0198459	0.0544471
comp2267341_c0_seq1_m.63653	0.324322	0.0170572	0.0199091	0.0546203
comp2276577_c0_seq8_m.92288	0.275031	0.0170945	0.0199091	0.0546203
comp2276498_c0_seq1_m.82544	-0.326609	0.0172643	0.0200466	0.0549976
comp2233777_c0_seq1_m.24586	-0.216855	0.0174955	0.0202544	0.0555676
comp2273519_c1_seq9_m.75533	0.380986	0.0176774	0.0204041	0.0559784
comp2269374_c0_seq3_m.67298	-0.211447	0.0177803	0.0204619	0.0561371
comp2269158_c0_seq1_m.66914	0.345023	0.0181919	0.0208737	0.0572667
comp2265049_c0_seq3_m.59764	0.461178	0.0184373	0.0210928	0.057868
comp2277230_c0_seq15_m.84634	-0.272327	0.0185211	0.0211264	0.05796
comp2269987_c0_seq2_m.68354	0.203408	0.0187753	0.0212931	0.0584174
comp2268937_c0_seq1_m.66472	0.304743	0.018777	0.0212931	0.0584174
comp2268340_c1_seq1_m.65478	0.283467	0.0189182	0.0213467	0.0585644
comp2272842_c0_seq2_m.74081	-0.48532	0.0189344	0.0213467	0.0585644
gnl_Pdu_trscrassembly_1_19681_m.92605	0.357757	0.0191183	0.0214672	0.0588952
comp2268441_c0_seq1_m.65632	0.605761	0.0191604	0.0214672	0.0588952
comp2287273_c0_seq1_contamination_m.91384	0.305259	0.0192319	0.0214672	0.0588952
comp2280536_c0_seq1_m.91231	0.294358	0.0193253	0.0214672	0.0588952
comp2271350_c0_seq18_m.70897	0.431774	0.0193304	0.0214672	0.0588952
comp2258014_c0_seq1_m.48797	-0.642776	0.0193734	0.0214672	0.0588952
comp2277337_c0_seq4_m.84929	0.190248	0.0194526	0.0214936	0.0589675
comp2247176_c0_seq3_m.35337	-0.201082	0.0198012	0.0217126	0.0595683
comp2241992_c0_seq1_m.30524	0.316592	0.0198402	0.0217126	0.0595683
comp2263771_c0_seq2_m.57851	0.21133	0.0198462	0.0217126	0.0595683
comp2273249_c0_seq4_m.74967	-0.365073	0.0198748	0.0217126	0.0595683
comp2277388_c0_seq8_m.85093	-0.48941	0.0202299	0.0220385	0.0604623
comp2274806_c0_seq1_m.78376	-0.567742	0.0205019	0.0222594	0.0610685
comp2278238_c1_seq2_m.88191	0.198028	0.0205475	0.0222594	0.0610685
comp2250533_c0_seq1_m.39039	-0.240008	0.0208818	0.0225585	0.0618892
comp2274106_c1_seq2_m.76871	-0.479763	0.0212868	0.0229323	0.0629145
comp2270576_c0_seq1_m.69463	0.421973	0.0215017	0.0230996	0.0633735
comp2278378_c0_seq4_m.88778	-0.50168	0.0219169	0.0234806	0.0644187
comp2272293_c0_seq1_m.72898	0.201351	0.0223772	0.0239077	0.0655906
comp2269029_c1_seq11_m.66661	-0.177959	0.0227864	0.0242255	0.0664625
comp2270905_c1_seq5_m.70069	-0.242941	0.0227996	0.0242255	0.0664625
comp2258554_c1_seq2_m.49570	-0.535133	0.022885	0.0242498	0.0665292
comp2244968_c0_seq1_m.33120	0.521583	0.0229516	0.024254	0.0665408
comp2275625_c0_seq11_m.80264	-0.461616	0.0232156	0.0244664	0.0671234
comp2275406_c1_seq7_m.79751	0.231979	0.0236522	0.0248543	0.0681874
comp2276634_c1_seq3_m.82935	0.382006	0.023737	0.0248543	0.0681874
comp2273667_c0_seq6_m.75821	0.204434	0.0238739	0.0248543	0.0681874
comp2261047_c0_seq1_m.53653	-0.335063	0.0238986	0.0248543	0.0681874
comp2251346_c0_seq1_m.39994	-0.267832	0.023904	0.0248543	0.0681874
comp2270372_c0_seq1_m.69078	0.234717	0.0242117	0.0250518	0.0687295
comp2274137_c1_seq25_m.76929	0.397104	0.0242341	0.0250518	0.0687295
comp2277163_c0_seq1_m.84431	-0.212895	0.0242879	0.0250518	0.0687295
comp2278194_c0_seq1_m.87981	-0.291273	0.0245972	0.0253037	0.0694203
comp2272583_c0_seq2_m.73488	-0.173263	0.0249085	0.025556	0.0701128
comp2262197_c0_seq1_m.55346	0.433871	0.0254305	0.0260228	0.0713933
comp2269814_c0_seq1_m.68069	0.224736	0.0258215	0.0263534	0.0723003
comp2276805_c0_seq8_m.83380	-0.199678	0.0262696	0.0267403	0.0733617
comp2266714_c1_seq1_m.62532	0.290431	0.0265104	0.0269148	0.0738404
comp2275698_c0_seq5_m.80432	-0.31485	0.0266713	0.0270074	0.0740946
comp2267483_c0_seq3_m.63903	-0.298528	0.026829	0.0270964	0.0743386
comp2274295_c0_seq2_m.77311	-0.498185	0.0269764	0.0271745	0.0745531
comp2270458_c0_seq1_m.69251	-0.269775	0.0270836	0.0272118	0.0746554
comp2271753_c0_seq2_m.71801	-0.219572	0.0273782	0.0274367	0.0752723
comp2107035_c0_seq2_m.6021	-0.204138	0.0279019	0.0278894	0.0765144
gnl_Pdu_trscrassembly_1_1644_m.62862	-0.226925	0.0286424	0.028556	0.0783432
comp2278012_c0_seq11_m.87235	-0.548717	0.0290819	0.02886	0.0791771
comp2277413_c0_seq4_m.85165	-0.265678	0.0290961	0.02886	0.0791771
comp2277374_c0_seq2_m.85051	0.37674	0.0295599	0.029125	0.0799043
comp2251866_c0_seq1_m.40557	-0.189561	0.029682	0.029125	0.0799043
comp2254566_c0_seq1_m.44122	-0.191273	0.0297073	0.029125	0.0799043
comp2280482_c0_seq1_m.91228	-0.294017	0.0297353	0.029125	0.0799043
comp2261980_c0_seq3_m.55041	-0.190441	0.0297574	0.029125	0.0799043
comp2269773_c0_seq6_m.68002	0.16355	0.0298139	0.029125	0.0799043
comp2212572_c0_seq1_m.15390	0.203096	0.0299312	0.0291661	0.080017
comp2265462_c0_seq5_m.60462	-0.239102	0.0301763	0.0293276	0.08046
comp2261058_c0_seq1_m.53667	0.225867	0.0302481	0.0293276	0.08046
comp2273845_c0_seq2_m.76206	0.26683	0.0304078	0.029346	0.0805105
comp2277816_c0_seq2_m.86536	-0.252903	0.0304184	0.029346	0.0805105
comp2247229_c0_seq1_m.35389	0.227135	0.0308089	0.029649	0.0813417
comp2277505_c0_seq1_m.85479	0.202234	0.0312121	0.029854	0.0819041
comp2269201_c0_seq1_m.67004	-0.563158	0.0312313	0.029854	0.0819041
comp2268798_c0_seq2_m.66233	0.466368	0.0312529	0.029854	0.0819041
comp1194290_c0_seq1_m.781	0.223112	0.0318315	0.030332	0.0832156
comp2276151_c0_seq3_m.81648	0.201877	0.0319614	0.0303811	0.0833504
comp2261373_c0_seq1_m.54127	-0.191148	0.0326803	0.0309771	0.0849855
comp2248254_c1_seq2_m.36433	0.553795	0.0327482	0.0309771	0.0849855
comp2256252_c0_seq1_m.46348	-0.458565	0.0329893	0.0310978	0.0853166
comp2276160_c0_seq4_m.81678	-0.287824	0.0330453	0.0310978	0.0853166
comp2267691_c0_seq1_m.64257	-0.246147	0.0331655	0.0310978	0.0853166
comp2234079_c0_seq2_m.24745	0.276708	0.0331965	0.0310978	0.0853166
comp1201878_c0_seq1_m.1138	-0.214895	0.0335561	0.0313589	0.0860329
gnl_Pdu_trscrassembly_1_1213_m.70099	-0.174517	0.0338091	0.0315195	0.0864734
comp2278605_c1_seq8_m.90480	-0.430344	0.0340418	0.0316602	0.0868595
gnl_Pdu_trscrassembly_1_20144_m.60515	0.349196	0.0341621	0.0316961	0.086958
comp2270385_c0_seq11_m.69105	0.29743	0.0344022	0.0318428	0.0873603
comp2262638_c0_seq1_m.56073	-0.190498	0.0347095	0.0320507	0.0879309
comp2277388_c0_seq8_m.85092	-0.366983	0.0350671	0.0323039	0.0886255
comp2275974_c0_seq18_m.81146	-0.596322	0.0352977	0.0324394	0.0889971
tuba_m.92505	0.462281	0.0359291	0.0329416	0.0903749
comp2275457_c1_seq8_m.79890	0.272481	0.0363756	0.033225	0.0911525
comp2265997_c0_seq1_m.61310	0.165625	0.0364223	0.033225	0.0911525
comp2269593_c0_seq3_m.67692	0.188705	0.0365629	0.033225	0.0911525
comp2269848_c0_seq4_m.68115	-0.337034	0.036581	0.033225	0.0911525
comp2237053_c0_seq1_m.26700	0.285048	0.0367581	0.0332278	0.0911602
comp2245511_c0_seq1_m.33658	-0.335026	0.0367768	0.0332278	0.0911602
comp2273772_c0_seq2_m.76039	0.194657	0.0369227	0.0332278	0.0911602
comp2266755_c0_seq1_m.62616	0.657239	0.0369267	0.0332278	0.0911602
comp2277951_c0_seq2_m.87004	-0.242678	0.037222	0.0333075	0.0913789
comp2268942_c0_seq5_m.66483	-0.316734	0.037239	0.0333075	0.0913789
comp2278454_c0_seq1_m.89160	-0.301939	0.0374121	0.0333075	0.0913789
comp2259377_c0_seq1_m.50914	-0.20768	0.0374312	0.0333075	0.0913789
comp2273645_c0_seq11_m.75781	0.276422	0.0374447	0.0333075	0.0913789
comp2276668_c0_seq1_m.83017	-0.325613	0.0380538	0.0337288	0.0925346
comp2275191_c1_seq2_m.79282	0.270389	0.0380923	0.0337288	0.0925346
comp2276166_c0_seq8_m.81705	0.400744	0.0382912	0.0337907	0.0927045
comp2262887_c0_seq1_m.56477	0.184562	0.0383364	0.0337907	0.0927045
comp2277312_c0_seq10_m.84862	0.257572	0.038438	0.0338034	0.0927393
comp2271381_c1_seq12_m.70942	-0.183132	0.0387189	0.0339734	0.0932057
comp2263950_c0_seq2_m.58147	0.310989	0.0389167	0.0340627	0.0934506
comp2263928_c0_seq2_m.58107	0.327162	0.0390026	0.0340627	0.0934506
comp2256558_c1_seq1_m.46706	-0.306424	0.0390841	0.0340627	0.0934506
comp2270432_c0_seq1_m.69185	-0.213826	0.0392656	0.0341441	0.0936739
comp2347711_c0_seq1_contamination_m.91628	-0.287055	0.0396431	0.0343952	0.0943629
comp2239935_c0_seq1_m.28757	-0.257969	0.0398144	0.0344668	0.0945593
comp2253656_c0_seq2_m.42945	-0.21988	0.0400006	0.0345508	0.0947898
comp2250550_c1_seq1_m.39064	-0.38375	0.0407109	0.0350192	0.096075
comp2266675_c0_seq1_m.62468	0.461362	0.0407624	0.0350192	0.096075
comp2142866_c0_seq1_m.7576	0.341856	0.0408581	0.0350192	0.096075
comp2252790_c0_seq1_m.41691	0.43253	0.0409894	0.0350192	0.096075
comp2275266_c0_seq21_m.79421	-0.20204	0.0409944	0.0350192	0.096075
comp2265029_c1_seq4_m.59734	0.223397	0.0415622	0.0353623	0.0970161
comp2260997_c1_seq7_m.53574	0.187751	0.0415783	0.0353623	0.0970161
comp2268903_c0_seq4_m.66397	-0.207476	0.0419141	0.0355443	0.0975154
comp2265494_c0_seq1_m.60519	0.424704	0.0419756	0.0355443	0.0975154
comp2271124_c0_seq1_m.70454	0.209846	0.042324	0.0357612	0.0981106
comp1194294_c0_seq1_m.785	0.281957	0.0426729	0.0359776	0.0987043
comp2279340_c0_seq1_m.91103	-0.186276	0.0429238	0.0360983	0.0990353
comp2273929_c1_seq1_m.76435	0.23128	0.0430022	0.0360983	0.0990353
comp2273141_c0_seq2_m.74737	-0.234758	0.0431771	0.0361186	0.099091
comp2277947_c0_seq1_m.86990	0.165014	0.0432126	0.0361186	0.099091
comp2249005_c0_seq2_m.37257	0.226071	0.0434751	0.0362599	0.0994786
comp2253875_c0_seq1_m.43271	0.273107	0.0435981	0.0362844	0.0995459
comp2278308_c1_seq12_m.88483	-0.179445	0.0438438	0.0363383	0.0996937
comp2139380_c0_seq1_m.6935	0.345778	0.0438502	0.0363383	0.0996937

## Sheet: PM_NM_Female vs M_NM_Female
	logFC	p.mod	q.mod	adjusted.pvalue
comp2242933_c0_seq1_m.31351	1.71377	3.62e-07	9.55e-05	0.000358279
gene17_m.92593	1.41501	6.73e-07	9.55e-05	0.000358279
comp2272698_c0_seq4_m.73763	0.850359	1.18e-06	0.000111814	0.0004196
comp2262137_c0_seq4_m.55246	-1.16506	2.49e-06	0.000176155	0.000661052
comp2234282_c0_seq1_m.24908	0.652552	7.62e-06	0.000431963	0.00162102
comp2272319_c0_seq24_m.72950	1.44637	1.18e-05	0.000559463	0.00209948
comp2263011_c0_seq1_m.56689	0.577782	1.49e-05	0.000602753	0.00226194
comp2267341_c0_seq1_m.63653	0.728343	2.05e-05	0.000649326	0.00243671
comp2266280_c0_seq1_m.61789	0.795485	2.06e-05	0.000649326	0.00243671
comp2270279_c0_seq7_m.68904	0.581614	2.42e-05	0.00068692	0.00257779
gnl_Pdu_trscr_assembly_1_91632_m.21453	0.654077	2.76e-05	0.000702922	0.00263784
comp2274819_c0_seq2_m.78403	0.661175	3.35e-05	0.000702922	0.00263784
comp2266512_c0_seq8_m.62145	0.52394	3.5e-05	0.000702922	0.00263784
comp2208474_c0_seq1_m.14351	1.05083	3.69e-05	0.000702922	0.00263784
comp2278587_c0_seq14_m.90327	-0.633551	3.74e-05	0.000702922	0.00263784
comp2276750_c0_seq1_m.83194	0.495726	4.03e-05	0.000702922	0.00263784
comp2273926_c0_seq5_m.76421	-1.30658	4.21e-05	0.000702922	0.00263784
comp2266841_c0_seq1_m.62766	-0.452285	4.65e-05	0.000732392	0.00274843
comp2265897_c0_seq5_m.61166	0.447088	5.61e-05	0.000740701	0.00277961
comp2262137_c0_seq3_m.92268	-1.14216	5.67e-05	0.000740701	0.00277961
gnl_Pdu_trscr_assembly_1_998_m.15062	0.579557	6.01e-05	0.000740701	0.00277961
comp2271994_c0_seq2_m.72269	-0.934073	6.1e-05	0.000740701	0.00277961
comp2261395_c0_seq1_m.54150	-0.62211	6.11e-05	0.000740701	0.00277961
comp2273141_c0_seq2_m.74737	-0.59281	6.27e-05	0.000740701	0.00277961
comp2257487_c0_seq1_m.48064	0.460896	6.53e-05	0.00074089	0.00278032
comp2275905_c0_seq4_m.80965	0.858294	7.94e-05	0.000817206	0.00306671
comp2277933_c1_seq7_m.86947	-0.698646	8.19e-05	0.000817206	0.00306671
comp2275110_c1_seq5_m.79090	0.835709	8.21e-05	0.000817206	0.00306671
comp2275241_c0_seq5_m.79383	-0.42121	8.36e-05	0.000817206	0.00306671
comp2268115_c0_seq2_m.65034	0.620099	9.76e-05	0.000921125	0.00345668
comp2251806_c0_seq1_m.40480	0.542739	0.000100712	0.000921125	0.00345668
comp2267571_c0_seq4_m.64058	0.521914	0.000106941	0.000931817	0.00349681
comp2189372_c0_seq1_m.11219	0.446609	0.000108454	0.000931817	0.00349681
comp2258554_c0_seq1_m.49568	-0.466381	0.00013773	0.00114523	0.00429767
comp2276768_c0_seq2_m.83249	0.718196	0.000141371	0.00114523	0.00429767
comp1965369_c0_seq1_contamination_m.3664	0.660181	0.000150836	0.00118796	0.00445803
gnl_Pdu_trscr_assembly_1_7327_m.81715	0.529415	0.000155812	0.00119398	0.00448064
comp2277416_c0_seq3_m.85174	-0.660025	0.000168106	0.0012543	0.00470697
comp2245014_c0_seq2_m.33157	0.856234	0.000188007	0.00135949	0.00510173
comp2276523_c0_seq2_m.82609	0.402089	0.000199477	0.00135949	0.00510173
comp2260058_c0_seq1_m.51934	0.701355	0.000201073	0.00135949	0.00510173
comp2263291_c0_seq2_m.57114	0.755052	0.000201384	0.00135949	0.00510173
comp2269060_c0_seq1_m.66718	-0.45959	0.000210259	0.00138351	0.00519188
comp2277501_c0_seq23_m.85461	-0.445132	0.000217206	0.00138351	0.00519188
comp2269906_c0_seq2_m.68214	0.617089	0.000223225	0.00138351	0.00519188
comp2267209_c0_seq1_m.63399	-0.563536	0.000224461	0.00138351	0.00519188
comp2277933_c1_seq7_m.86946	-1.03407	0.000239269	0.00144341	0.00541664
comp2276871_c0_seq8_m.83582	0.503238	0.000269998	0.00159485	0.00598496
comp1838578_c0_seq1_m.2293	0.814456	0.000284939	0.00159665	0.00599172
comp1945561_c0_seq2_m.3380	-0.611292	0.000293554	0.00159665	0.00599172
comp2276277_c0_seq18_m.81972	0.476536	0.000296937	0.00159665	0.00599172
comp2268892_c0_seq1_m.66381	-0.462646	0.000298902	0.00159665	0.00599172
comp2279213_c0_seq1_m.91075	0.496268	0.000299497	0.00159665	0.00599172
comp2269171_c0_seq3_m.66933	0.449986	0.000304091	0.00159665	0.00599172
comp2252186_c0_seq3_m.40915	0.947929	0.000321319	0.00165643	0.00621607
comp1197507_c0_seq1_m.1032	0.6423	0.000336932	0.00170104	0.00638346
comp2203251_c0_seq1_m.13504	-0.401184	0.000341971	0.00170104	0.00638346
comp2266171_c0_seq1_m.61557	0.527502	0.000348277	0.00170254	0.00638908
comp2249227_c0_seq1_m.37479	0.375209	0.00035736	0.00171733	0.0064446
comp2254470_c0_seq1_m.44006	-0.36692	0.000378659	0.00176801	0.00663479
comp2276389_c1_seq15_m.82250	0.420974	0.000380378	0.00176801	0.00663479
comp2277947_c0_seq1_m.86990	0.577955	0.000403745	0.00181987	0.0068294
comp2278405_c0_seq22_m.88893	-0.965743	0.000404372	0.00181987	0.0068294
comp2257395_c0_seq4_m.47951	-1.69625	0.000410921	0.00182045	0.00683157
comp2223962_c0_seq7_m.19686	0.550191	0.000419445	0.00182963	0.00686599
comp2236614_c0_seq1_m.26450	-1.04601	0.000428079	0.00182992	0.00686709
comp2265885_c0_seq3_m.61143	-0.575179	0.00043242	0.00182992	0.00686709
comp2253856_c0_seq1_m.43254	0.538581	0.00046721	0.00192286	0.00721589
comp2263921_c0_seq2_m.58101	-0.745208	0.000481122	0.00192286	0.00721589
comp2271350_c0_seq18_m.70897	0.815957	0.000489766	0.00192286	0.00721589
comp2273599_c0_seq7_m.75677	-0.709532	0.000498739	0.00192286	0.00721589
comp2268340_c1_seq1_m.65478	-0.322821	0.000505918	0.00192286	0.00721589
comp2265589_c0_seq2_m.60673	0.475034	0.000507371	0.00192286	0.00721589
comp2247988_c0_seq1_m.36173	-0.530901	0.000508108	0.00192286	0.00721589
comp2274295_c0_seq2_m.77311	-1.1859	0.000515027	0.00192286	0.00721589
comp2265656_c0_seq3_m.60780	-1.24814	0.000517407	0.00192286	0.00721589
comp2263928_c0_seq2_m.58107	0.679211	0.000526991	0.00192286	0.00721589
comp2244968_c0_seq1_m.33120	0.63147	0.000539928	0.00192286	0.00721589
gnl_Pdu_trscr_assembly_1_2615_m.68529	0.368508	0.000542725	0.00192286	0.00721589
comp2261623_c0_seq1_m.54431	-0.701771	0.000545804	0.00192286	0.00721589
comp2269321_c1_seq1_m.67212	0.48172	0.00054933	0.00192286	0.00721589
comp2204754_c0_seq1_m.13720	-0.46917	0.000572386	0.00197913	0.00742706
gnl_Pdu_trscr_assembly_1_16296_m.13041	0.363528	0.000600545	0.00202204	0.00758805
gnl_Pdu_trscr_assembly_1_14069_m.67140	0.456745	0.00061359	0.00202204	0.00758805
comp2278306_c0_seq2_m.88465	-0.395964	0.000614409	0.00202204	0.00758805
comp2260394_c0_seq1_m.52394	0.445853	0.00061605	0.00202204	0.00758805
comp2278010_c1_seq9_m.87231	0.342673	0.000620451	0.00202204	0.00758805
comp2261399_c0_seq2_m.54155	-1.08676	0.000672534	0.00216686	0.00813155
comp1910314_c0_seq1_m.2848	0.526053	0.000680436	0.00216769	0.00813465
comp2277729_c0_seq10_m.86207	-0.831625	0.000704276	0.00218463	0.00819823
comp2265077_c0_seq1_m.59810	0.344293	0.000708684	0.00218463	0.00819823
comp2271737_c1_seq2_m.71770	0.875265	0.000716865	0.00218463	0.00819823
comp2261362_c0_seq2_m.54116	-0.456499	0.000718395	0.00218463	0.00819823
comp2254456_c0_seq2_m.43993	-0.482504	0.00072428	0.00218463	0.00819823
comp2278454_c0_seq1_m.89160	-0.487105	0.000745858	0.00221091	0.00829683
comp2273142_c0_seq1_m.74744	0.357371	0.000748586	0.00221091	0.00829683
comp2138952_c0_seq1_m.6867	-0.510021	0.000776292	0.0022691	0.0085152
comp2269324_c0_seq1_m.67217	0.431848	0.000801978	0.00232026	0.00870719
comp2262339_c0_seq1_m.55609	0.504538	0.000835575	0.00239304	0.00898032
comp2278554_c0_seq4_m.90013	-0.304205	0.000862148	0.00242502	0.00910033
comp2274806_c0_seq1_m.78376	-0.750324	0.000863847	0.00242502	0.00910033
comp2269009_c0_seq1_m.66627	0.44561	0.000882271	0.00245246	0.00920329
comp2269580_c0_seq1_m.67656	0.323984	0.000913394	0.00247464	0.00928652
comp2263896_c0_seq3_m.58065	0.431888	0.000915214	0.00247464	0.00928652
comp2270148_c0_seq3_m.68661	0.436583	0.000916433	0.00247464	0.00928652
comp2252318_c0_seq1_m.41154	0.433592	0.000977842	0.00261555	0.00981532
comp2254675_c0_seq1_m.44244	0.451031	0.00102682	0.0027139	0.0101844
comp2277680_c0_seq25_m.86056	-0.408432	0.00103376	0.0027139	0.0101844
comp2272491_c1_seq4_m.73302	0.281917	0.0010652	0.00276707	0.0103839
gnl_Pdu_trscr_assembly_1_5530_m.58454	-0.505815	0.00109894	0.00276707	0.0103839
comp2225664_c0_seq1_m.20382	-0.493366	0.00110177	0.00276707	0.0103839
gnl_Pdu_trscr_assembly_1_200732_m.91055	0.735394	0.00111723	0.00276707	0.0103839
comp2275893_c0_seq1_m.80933	0.914622	0.00112459	0.00276707	0.0103839
comp2275822_c0_seq10_m.80745	-0.492465	0.00112769	0.00276707	0.0103839
comp2270797_c0_seq10_m.69872	-0.30081	0.00113375	0.00276707	0.0103839
comp2004487_c0_seq1_m.4269	0.732581	0.00113752	0.00276707	0.0103839
gnl_Pdu_trscr_assembly_1_1986_m.5698	0.292929	0.00114184	0.00276707	0.0103839
comp2275391_c0_seq1_m.79711	0.557513	0.00115521	0.00277575	0.0104165
comp2268172_c0_seq1_m.65149	0.424475	0.00117083	0.00277916	0.0104293
comp2275662_c1_seq10_m.80344	-0.507579	0.00118201	0.00277916	0.0104293
comp2263873_c0_seq9_m.58029	-1.3954	0.00118608	0.00277916	0.0104293
comp2277869_c0_seq29_m.86707	0.336144	0.00119584	0.00277916	0.0104293
comp2272233_c0_seq1_m.72760	-0.30672	0.00121492	0.00280054	0.0105095
comp2260797_c0_seq1_m.53088	0.393346	0.00123713	0.00282875	0.0106154
comp2278536_c1_seq38_m.89884	-0.786862	0.00126387	0.00286678	0.0107581
comp2269060_c1_seq1_m.66719	-0.523711	0.00131089	0.0029494	0.0110682
comp2273865_c0_seq2_m.76255	0.361665	0.0013211	0.0029494	0.0110682
comp2273911_c0_seq8_m.76361	0.41512	0.00135742	0.00300681	0.0112836
comp2258193_c0_seq1_m.49089	0.397694	0.00141486	0.00310275	0.0116436
comp2263277_c0_seq1_m.57091	-0.375908	0.00142297	0.00310275	0.0116436
comp2143411_c0_seq1_m.7656	0.431803	0.00144775	0.00310275	0.0116436
comp2272782_c0_seq2_m.73955	0.568939	0.001455	0.00310275	0.0116436
comp2257781_c0_seq1_m.48513	-0.343566	0.00145545	0.00310275	0.0116436
comp2270404_c0_seq3_m.69137	0.395546	0.00147501	0.00311017	0.0116715
isotig10568_m.92324	-0.648321	0.00148087	0.00311017	0.0116715
comp2268869_c0_seq6_m.66344	-1.17685	0.00149756	0.00312209	0.0117162
comp2261876_c0_seq1_m.54865	-0.99499	0.00154141	0.00319006	0.0119713
comp2272437_c1_seq1_m.73204	0.953945	0.00157211	0.00321313	0.0120578
comp2266005_c0_seq5_m.61322	-0.495146	0.00157523	0.00321313	0.0120578
comp2278589_c0_seq3_m.90346	-0.27744	0.00160706	0.00325464	0.0122136
comp2279445_c0_seq1_m.91120	-0.518139	0.00163395	0.00328564	0.01233
comp2265326_c0_seq3_m.60204	-0.8762	0.00165416	0.00330286	0.0123946
comp2257905_c0_seq1_m.48664	0.323077	0.00169146	0.00335371	0.0125854
gnl_Pdu_trscr_assembly_1_15590_m.29311	-1.72946	0.00172281	0.00336348	0.0126221
comp2256220_c0_seq1_m.46316	-0.543754	0.00172923	0.00336348	0.0126221
comp2258609_c0_seq1_m.49647	-0.291017	0.00173197	0.00336348	0.0126221
comp2261716_c0_seq2_m.54597	-0.617496	0.00181116	0.00347499	0.0130405
comp2244437_c0_seq1_m.32653	0.40071	0.00181391	0.00347499	0.0130405
comp2254477_c0_seq1_m.44015	0.594389	0.00186389	0.0035351	0.0132661
comp2271595_c0_seq2_m.71452	-0.436656	0.00187022	0.0035351	0.0132661
comp2278054_c0_seq40_m.87392	-0.599976	0.00188931	0.00354748	0.0133125
comp2236992_c0_seq1_m.26663	0.251013	0.00190678	0.00354748	0.0133125
comp2256041_c0_seq1_m.46046	0.365104	0.00191858	0.00354748	0.0133125
gnl_Pdu_trscr_assembly_1_11607_m.26425	-0.381828	0.00193665	0.00354748	0.0133125
comp1781461_c0_seq1_m.2253	-0.566308	0.00194112	0.00354748	0.0133125
gnl_Pdu_trscr_assembly_1_326_m.78835	-0.401568	0.00195934	0.00354748	0.0133125
comp2271419_c1_seq1_m.71009	-0.237236	0.00196435	0.00354748	0.0133125
gnl_Pdu_trscr_assembly_1_2589_m.58494	0.340432	0.00200397	0.00359612	0.0134951
comp2272691_c0_seq4_m.73750	-1.34576	0.00208262	0.00367241	0.0137814
comp2278376_c0_seq1_m.88768	-0.434926	0.00208984	0.00367241	0.0137814
comp2257585_c0_seq1_m.48216	-0.439903	0.00209831	0.00367241	0.0137814
comp2251386_c0_seq2_m.40044	0.488716	0.00210924	0.00367241	0.0137814
comp2271539_c0_seq2_m.71326	0.421161	0.002114	0.00367241	0.0137814
comp2276805_c0_seq8_m.83380	-0.768343	0.0021242	0.00367241	0.0137814
comp2269230_c0_seq2_m.67055	-0.316855	0.00218091	0.00374761	0.0140636
comp2275701_c1_seq1_m.80440	-0.528931	0.00221042	0.00377088	0.0141509
gnl_Pdu_trscr_assembly_1_14638_m.60097	0.333345	0.00222105	0.00377088	0.0141509
comp2238188_c0_seq1_m.27576	0.706549	0.00225874	0.00381204	0.0143054
comp2277475_c0_seq2_m.85365	-0.404156	0.00228719	0.00383721	0.0143998
gnl_Pdu_trscr_assembly_1_12794_m.61443	-0.893302	0.00231951	0.00386855	0.0145174
comp2277945_c0_seq2_m.86985	-1.36687	0.00246296	0.00405241	0.0152074
comp2272961_c0_seq1_m.74370	0.44912	0.002466	0.00405241	0.0152074
comp2265386_c0_seq2_m.60299	0.642242	0.00248472	0.00405241	0.0152074
comp2226333_c0_seq1_m.20670	0.273127	0.00249403	0.00405241	0.0152074
comp2263394_c0_seq1_m.57263	-0.385835	0.00250121	0.00405241	0.0152074
comp2269793_c0_seq1_m.68039	-0.320038	0.00253601	0.00408544	0.0153313
comp2253217_c0_seq2_m.42336	0.497749	0.00262498	0.00418942	0.0157215
comp2269915_c0_seq3_m.68230	-0.314744	0.00263011	0.00418942	0.0157215
comp2245053_c0_seq1_m.33185	-0.553554	0.00266456	0.00422058	0.0158385
comp2254206_c0_seq1_m.43646	0.376025	0.00268286	0.00422597	0.0158587
comp2278630_c0_seq8_m.90809	-0.259477	0.00272209	0.00424816	0.015942
comp2263667_c0_seq1_m.57601	0.453739	0.00272692	0.00424816	0.015942
comp2274909_c0_seq7_m.78615	-1.6872	0.00282169	0.00434086	0.0162898
comp2268443_c0_seq2_m.65634	-0.272978	0.00282906	0.00434086	0.0162898
comp2277995_c0_seq1_m.87177	-0.726388	0.00283235	0.00434086	0.0162898
comp2264743_c0_seq3_m.59295	-0.242472	0.00287091	0.00437629	0.0164228
comp2276151_c0_seq3_m.81648	-0.37806	0.00299391	0.00451662	0.0169494
comp2275542_c0_seq9_m.80087	-0.326759	0.00299829	0.00451662	0.0169494
comp2273385_c0_seq1_m.75218	-0.26263	0.00302219	0.00451662	0.0169494
comp2277484_c0_seq6_m.85397	0.378593	0.00302668	0.00451662	0.0169494
comp2278509_c0_seq8_m.89637	-0.651613	0.00307437	0.00456377	0.0171264
comp2277337_c0_seq4_m.84929	0.261055	0.00309573	0.00457153	0.0171555
comp2279773_c0_seq1_m.91181	0.287189	0.00314262	0.00461674	0.0173251
comp2262281_c0_seq3_m.55504	-0.888753	0.00323528	0.00472836	0.017744
comp2258554_c1_seq2_m.49570	-0.462582	0.00326463	0.00474247	0.017797
comp2257674_c0_seq1_m.48339	-0.982933	0.00327839	0.00474247	0.017797
comp2269987_c0_seq2_m.68354	-0.415504	0.0033221	0.0047813	0.0179427
comp2239691_c0_seq1_m.28548	-0.69503	0.00339667	0.00486394	0.0182528
comp2224014_c0_seq1_m.19704	0.652755	0.00341774	0.00486952	0.0182737
comp2263658_c0_seq3_m.57592	-0.432402	0.00351945	0.00495373	0.0185898
comp2222959_c0_seq1_m.19328	0.5829	0.00352635	0.00495373	0.0185898
comp2274909_c0_seq7_m.78613	-1.67863	0.00353812	0.00495373	0.0185898
comp2237468_c0_seq1_m.27022	0.344405	0.00354673	0.00495373	0.0185898
gnl_Pdu_trscr_assembly_1_9334_m.28552	-0.58028	0.00357441	0.00496791	0.018643
comp2141229_c0_seq1_m.7283	0.343989	0.0036342	0.00502638	0.0188624
comp2275714_c2_seq1_m.80469	0.509981	0.00367148	0.00504893	0.018947
comp1198575_c0_seq1_m.1066	0.345701	0.00368612	0.00504893	0.018947
comp2278308_c1_seq12_m.88483	-0.314531	0.00372769	0.00505806	0.0189813
comp2254167_c0_seq1_m.43587	0.463723	0.00373978	0.00505806	0.0189813
comp2275270_c0_seq2_m.79424	0.428463	0.0037607	0.00505806	0.0189813
comp2270774_c0_seq1_m.69818	0.213832	0.00376414	0.00505806	0.0189813
comp2274137_c1_seq25_m.76929	1.02869	0.00387105	0.005155	0.0193451
comp2253149_c0_seq1_m.42245	0.263625	0.00387265	0.005155	0.0193451
comp2268336_c1_seq1_m.65474	0.444446	0.00393188	0.00520401	0.019529
comp2274912_c0_seq4_m.78634	-0.323331	0.00395259	0.00520401	0.019529
comp2245721_c0_seq1_m.33844	0.506961	0.00396453	0.00520401	0.019529
comp2268441_c0_seq1_m.65632	0.567154	0.0040266	0.00526114	0.0197434
comp1326513_c0_seq1_m.1923	0.813662	0.0040915	0.00529801	0.0198817
comp2206512_c0_seq1_m.14012	0.368166	0.0040922	0.00529801	0.0198817
comp2257633_c0_seq1_m.48279	0.346466	0.00421205	0.00540562	0.0202856
comp2251594_c0_seq1_m.40214	0.461797	0.00421345	0.00540562	0.0202856
comp2274700_c0_seq3_m.78156	0.273571	0.00426482	0.00543633	0.0204008
comp2262317_c0_seq2_m.55577	0.29061	0.00427573	0.00543633	0.0204008
comp2268336_c0_seq2_m.65472	0.301924	0.00431503	0.00544257	0.0204242
comp2257693_c0_seq3_m.48359	0.21399	0.00431903	0.00544257	0.0204242
comp2272724_c0_seq1_m.73818	-0.28469	0.00438455	0.00546705	0.0205161
comp2273257_c0_seq9_m.74986	0.52279	0.00439146	0.00546705	0.0205161
comp2277132_c1_seq1_m.84335	0.274981	0.00440904	0.00546705	0.0205161
comp2273038_c0_seq3_m.74522	-0.534767	0.00441558	0.00546705	0.0205161
comp2197446_c0_seq1_m.12404	-0.252592	0.00443946	0.00547271	0.0205373
comp2274259_c0_seq1_m.77220	-0.315552	0.00449703	0.00550303	0.0206511
gnl_Pdu_trscr_assembly_1_1644_m.62862	-0.284193	0.00452969	0.00550303	0.0206511
comp2257939_c0_seq1_m.48703	0.446538	0.0045318	0.00550303	0.0206511
comp2232290_c0_seq2_m.23637	-1.12531	0.00461045	0.00550303	0.0206511
comp2269297_c0_seq2_m.67181	0.635269	0.00463234	0.00550303	0.0206511
comp2263661_c0_seq1_m.57595	-0.223206	0.00463305	0.00550303	0.0206511
comp2276741_c0_seq2_m.83166	0.326954	0.00464148	0.00550303	0.0206511
comp2269110_c0_seq3_m.66810	0.314039	0.00464723	0.00550303	0.0206511
comp2276440_c0_seq2_m.82383	-0.544081	0.0046483	0.00550303	0.0206511
comp2244716_c0_seq1_m.32883	-0.31622	0.00465815	0.00550303	0.0206511
comp2277479_c0_seq1_m.85385	-0.250592	0.00469418	0.00552259	0.0207245
comp2269850_c0_seq1_m.68122	-0.699945	0.0047816	0.00560219	0.0210232
comp2262731_c0_seq1_m.56213	-0.752703	0.00500956	0.00582233	0.0218493
comp2271350_c0_seq18_m.70898	0.428087	0.00501056	0.00582233	0.0218493
comp2277088_c0_seq32_m.84183	-0.249056	0.00505008	0.0058443	0.0219318
comp2275698_c0_seq5_m.80432	-0.273092	0.00512033	0.00588623	0.0220891
comp2271567_c0_seq1_m.71391	-0.588589	0.00512783	0.00588623	0.0220891
comp2276491_c0_seq8_m.82522	0.294558	0.00525594	0.00600896	0.0225497
comp2263909_c0_seq2_m.58087	-0.277446	0.00531781	0.00605527	0.0227235
comp2262465_c0_seq5_m.55795	-0.946016	0.00535498	0.00607321	0.0227908
comp2275759_c0_seq17_m.80560	0.226005	0.00552955	0.00624429	0.0234328
comp2278534_c0_seq1_m.89879	-0.256094	0.00555618	0.00624429	0.0234328
comp2264796_c2_seq1_m.59361	0.483453	0.00558068	0.00624429	0.0234328
comp2271649_c0_seq1_m.71599	-0.380207	0.00559393	0.00624429	0.0234328
comp2221095_c0_seq1_m.18558	-0.474629	0.00564293	0.00627429	0.0235454
comp2276461_c0_seq7_m.82444	-0.381816	0.00569058	0.00629458	0.0236215
comp2271675_c0_seq2_m.71655	-0.649724	0.00570558	0.00629458	0.0236215
comp2267558_c0_seq1_m.64038	-0.254709	0.00575112	0.00632023	0.0237178
comp2143334_c0_seq2_m.7649	-0.33377	0.00579	0.00633839	0.0237859
comp2259963_c0_seq1_m.51818	-0.296439	0.00582873	0.0063446	0.0238092
comp2247229_c0_seq1_m.35389	0.272871	0.00584042	0.0063446	0.0238092
comp2187328_c0_seq1_m.10936	-0.267707	0.00599337	0.00648589	0.0243395
comp2259211_c0_seq1_m.50658	0.231752	0.00616767	0.00660905	0.0248017
comp2268906_c0_seq4_m.66401	-0.396253	0.00617233	0.00660905	0.0248017
comp2277816_c0_seq2_m.86536	-0.286487	0.0061771	0.00660905	0.0248017
comp2250533_c0_seq1_m.39039	-0.234066	0.00624959	0.00666148	0.0249984
comp2270372_c0_seq1_m.69078	0.230725	0.00637036	0.00674615	0.0253161
comp1194290_c0_seq1_m.781	0.876098	0.00637662	0.00674615	0.0253161
gnl_Pdu_trscr_assembly_1_200732_m.91056	0.767375	0.0064729	0.00682255	0.0256028
comp2278605_c1_seq8_m.90480	-0.703214	0.00662133	0.00695315	0.026093
comp2273501_c0_seq2_m.75506	0.277311	0.00678009	0.0070936	0.02662
comp1196959_c0_seq2_m.1014	-0.372009	0.00682481	0.00711413	0.0266971
comp2274693_c0_seq1_m.78142	-0.265995	0.00686848	0.00713342	0.0267694
comp2257070_c0_seq2_m.47513	-0.74277	0.00692844	0.00716944	0.0269046
comp2259918_c0_seq1_m.51762	0.281405	0.00702998	0.00724806	0.0271996
comp1194362_c0_seq2_m.804	0.220211	0.00708817	0.00728157	0.0273254
comp2261334_c1_seq1_m.54085	-0.388595	0.00715347	0.00730219	0.0274028
comp2277163_c0_seq1_m.84431	0.226222	0.00715975	0.00730219	0.0274028
comp2257070_c0_seq2_m.47512	-1.23632	0.0073086	0.00742729	0.0278722
comp2275495_c0_seq1_m.79975	0.35714	0.00771848	0.00781582	0.0293302
comp2277759_c0_seq3_m.86312	-0.229404	0.00776728	0.00783411	0.0293989
comp2265735_c0_seq4_m.60895	-0.193147	0.00781872	0.00783411	0.0293989
comp2278062_c0_seq4_m.87412	0.2821	0.00781944	0.00783411	0.0293989
comp2273845_c0_seq2_m.76206	0.472365	0.00792036	0.00787959	0.0295696
comp2275167_c0_seq1_m.79227	-0.236765	0.00792042	0.00787959	0.0295696
comp2266503_c0_seq6_m.62129	-0.280572	0.00797915	0.00791026	0.0296847
comp2265370_c0_seq1_m.60276	0.196205	0.00811635	0.00801825	0.0300899
comp2262740_c0_seq13_m.56232	-0.263	0.00815456	0.00802796	0.0301264
comp2256095_c0_seq1_m.46136	-0.430433	0.00818282	0.00802796	0.0301264
comp2250201_c0_seq1_m.38525	-0.242182	0.00834292	0.00813901	0.0305431
comp2274537_c0_seq28_m.77857	-0.284348	0.00837158	0.00813901	0.0305431
comp2272371_c0_seq1_m.73054	-0.205487	0.00839808	0.00813901	0.0305431
gnl_Pdu_trscr_assembly_1_1986_m.5697	-0.283639	0.008445	0.00813901	0.0305431
comp1970723_c0_seq1_m.3752	0.360146	0.00846532	0.00813901	0.0305431
comp2270119_c0_seq15_m.68605	-0.277717	0.00846824	0.00813901	0.0305431
comp2273466_c0_seq2_m.75427	0.24176	0.008705	0.0083383	0.031291
comp2229729_c0_seq1_m.22264	-0.514354	0.0087907	0.00839203	0.0314926
comp2276719_c0_seq5_m.83124	0.557737	0.00887817	0.0084471	0.0316993
comp2278276_c0_seq16_m.88350	-0.281134	0.00894219	0.00847956	0.0318211
comp2280694_c0_seq1_m.91236	0.328643	0.00901491	0.00851528	0.0319551
comp2277142_c0_seq6_m.84365	-0.614074	0.00903994	0.00851528	0.0319551
comp2274096_c1_seq4_m.76855	-0.179166	0.0091089	0.00855184	0.0320923
comp2261368_c1_seq1_m.54120	-0.207716	0.00914121	0.00855384	0.0320998
comp2276634_c1_seq3_m.82935	0.33696	0.00967589	0.00900797	0.033804
comp2277289_c0_seq1_m.84785	0.324177	0.00969007	0.00900797	0.033804
comp2273595_c0_seq1_m.75667	-0.302399	0.0098066	0.00908651	0.0340988
comp2257131_c0_seq2_m.47590	0.507723	0.00989968	0.00914288	0.0343103
comp2276577_c0_seq8_m.92288	-0.705046	0.00999199	0.00919817	0.0345178
comp2278012_c0_seq11_m.87235	-0.72451	0.0102573	0.00937408	0.0351779
comp2278480_c0_seq4_m.89330	-0.665837	0.0102656	0.00937408	0.0351779
comp2263822_c0_seq1_m.57945	0.463585	0.0102823	0.00937408	0.0351779
comp2226643_c0_seq1_m.20830	0.261228	0.0103303	0.00937517	0.035182
comp2269698_c0_seq1_m.67864	-0.491223	0.0103496	0.00937517	0.035182
comp2277352_c0_seq3_m.84974	-0.449458	0.0104009	0.00938158	0.0352061
comp2271244_c0_seq1_m.70676	-0.352485	0.0104228	0.00938158	0.0352061
comp2265494_c0_seq1_m.60519	0.456494	0.0105265	0.00944486	0.0354435
comp2260649_c0_seq2_m.52797	-0.252565	0.0105849	0.0094673	0.0355277
comp2275769_c0_seq3_m.80583	-0.224486	0.0108253	0.00965187	0.0362204
comp2269374_c0_seq3_m.67298	-0.24771	0.0109178	0.00969592	0.0363857
comp2254418_c0_seq1_m.43945	0.209435	0.0109431	0.00969592	0.0363857
comp2273356_c0_seq1_m.75157	-0.212565	0.0110211	0.00973467	0.0365311
comp2277740_c0_seq2_m.86258	0.394576	0.0112706	0.00990283	0.0371621
comp1977957_c0_seq1_m.3878	-0.355603	0.0112814	0.00990283	0.0371621
comp2277351_c1_seq2_m.84968	-0.230844	0.0113466	0.00992939	0.0372618
comp2278268_c0_seq9_m.88316	-0.231939	0.0113946	0.00994066	0.0373041
comp2272641_c0_seq2_m.73619	-0.196598	0.0115531	0.0100336	0.037653
comp2241992_c0_seq1_m.30524	0.246529	0.0115719	0.0100336	0.037653
comp2274541_c0_seq1_m.77862	-0.498821	0.0116471	0.010068	0.037782
comp2269814_c0_seq1_m.68069	-0.20684	0.0117383	0.0100973	0.037892
comp2277203_c0_seq4_m.84565	0.276367	0.0117522	0.0100973	0.037892
comp2279235_c0_seq1_m.91078	0.31281	0.0118298	0.0101083	0.0379332
comp2236007_c0_seq2_m.26049	0.530308	0.0118363	0.0101083	0.0379332
comp2275853_c0_seq1_m.80817	-0.201925	0.0118926	0.0101143	0.0379559
comp2261183_c0_seq1_m.53867	-0.352879	0.0119147	0.0101143	0.0379559
comp2245960_c0_seq1_m.34133	-0.249996	0.0121214	0.0102591	0.0384991
comp2276295_c0_seq1_m.82012	0.161779	0.0122129	0.0103057	0.0386741
comp2273900_c0_seq1_m.76336	0.309405	0.0122595	0.0103144	0.0387066
comp2272882_c0_seq14_m.74184	0.662194	0.0124167	0.0104157	0.0390867
comp2280591_c0_seq1_m.91233	0.247351	0.0125957	0.0105347	0.0395335
comp2275153_c0_seq1_m.79199	-0.168477	0.012692	0.010584	0.0397183
comp2277374_c0_seq2_m.85051	-0.31585	0.0129394	0.0107587	0.0403739
comp2276160_c0_seq4_m.81678	0.378411	0.0130924	0.0108541	0.0407319
comp2276648_c1_seq1_m.82962	-0.228286	0.0132374	0.0109423	0.041063
comp2224448_c0_seq1_m.19874	0.308134	0.0132832	0.0109482	0.0410852
comp1234630_c0_seq1_m.1254	0.293059	0.0133486	0.0109555	0.0411124
comp2277977_c1_seq3_m.87126	-0.276764	0.0133692	0.0109555	0.0411124
comp2276966_c0_seq13_m.83854	-0.189191	0.0135229	0.0110125	0.0413265
comp2228430_c0_seq1_m.21640	-0.277125	0.0135337	0.0110125	0.0413265
comp2267169_c0_seq1_m.63315	0.352343	0.0135554	0.0110125	0.0413265
comp2273813_c0_seq2_m.76128	-0.270741	0.0136569	0.0110633	0.0415171
comp2266801_c0_seq2_m.62707	0.21086	0.0137481	0.0111055	0.0416753
comp2269421_c0_seq7_m.67382	0.190964	0.0138784	0.0111548	0.0418602
gnl_Pdu_trscr_assembly_1_11633_m.54013	0.267479	0.0138878	0.0111548	0.0418602
comp2267172_c0_seq1_m.63318	-0.239694	0.0140145	0.0111947	0.04201
comp2273204_c0_seq26_m.74869	-0.22399	0.0140618	0.0111947	0.04201
comp2253516_c0_seq4_m.42708	-0.952034	0.0140791	0.0111947	0.04201
comp2264855_c0_seq1_m.59451	0.298943	0.0141327	0.0111947	0.04201
comp2277134_c1_seq4_m.84342	-0.191975	0.014135	0.0111947	0.04201
comp2275312_c0_seq8_m.79518	-0.375863	0.0142872	0.0112407	0.0421827
gnl_Pdu_trscr_assembly_1_6063_m.1752	0.28454	0.0143034	0.0112407	0.0421827
comp2274278_c0_seq6_m.77267	0.218005	0.014312	0.0112407	0.0421827
comp2250470_c0_seq1_m.38949	0.226225	0.0144478	0.011316	0.0424654
comp2278161_c0_seq3_m.87805	-0.219935	0.0145877	0.0113941	0.0427585
comp2275933_c0_seq1_m.81045	-0.521418	0.0149035	0.0116088	0.0435642
comp2274961_c0_seq5_m.78739	0.379214	0.0155153	0.0120522	0.045228
comp2260519_c0_seq10_m.52611	0.280913	0.0157164	0.0121612	0.0456373
comp2274031_c0_seq3_m.76707	-0.184712	0.0157414	0.0121612	0.0456373
comp2261121_c0_seq1_m.53764	0.254807	0.0158207	0.0121893	0.0457425
comp2279272_c0_seq1_m.91086	-0.208491	0.015978	0.0122748	0.0460634
comp2140166_c0_seq1_m.7086	0.204331	0.0160183	0.0122748	0.0460634
comp2261428_c0_seq1_m.54200	-0.23017	0.0161085	0.0123107	0.0461981
comp2277332_c0_seq1_m.84919	0.155279	0.0161673	0.0123203	0.0462342
comp2141997_c0_seq1_m.7386	-0.905016	0.0162081	0.0123203	0.0462342
comp2272807_c0_seq4_m.74003	-0.203734	0.0163123	0.0123664	0.0464072
comp2235681_c0_seq1_m.25791	0.538219	0.01637	0.012377	0.046447
comp2277282_c0_seq11_m.84762	0.298055	0.0164548	0.0124015	0.0465388
gi_613484551	-0.683816	0.0164898	0.0124015	0.0465388
comp2274106_c1_seq2_m.76871	-1.28641	0.0168113	0.0126099	0.0473207
comp2269231_c0_seq2_m.67056	0.372545	0.0170173	0.0126993	0.0476563
comp2278480_c1_seq1_m.89333	-0.656397	0.0170201	0.0126993	0.0476563
comp2233777_c0_seq1_m.24586	-0.180347	0.0171821	0.0127865	0.0479835
comp2266233_c0_seq1_m.61658	-0.356814	0.0173503	0.0128497	0.0482207
comp2269345_c0_seq1_m.67253	-0.280632	0.0173576	0.0128497	0.0482207
comp2234809_c0_seq1_m.25266	0.267862	0.0176108	0.0129874	0.0487376
comp2261983_c0_seq1_m.55047	-0.196969	0.0176353	0.0129874	0.0487376
comp2279340_c0_seq1_m.91103	-0.851114	0.017998	0.0131972	0.0495249
comp2280536_c0_seq1_m.91231	0.499255	0.0180133	0.0131972	0.0495249
comp2214888_c0_seq1_m.16124	-0.222038	0.0180653	0.0131988	0.0495308
comp2272920_c0_seq1_m.74280	-0.284749	0.0181085	0.0131988	0.0495308
comp2279536_c0_seq1_m.91140	0.325323	0.0182819	0.013291	0.0498767
comp2278077_c0_seq3_m.87468	0.407982	0.0184088	0.013349	0.0500946
comp2274301_c0_seq6_m.77327	-0.293487	0.0184793	0.0133659	0.050158
comp2265464_c0_seq1_m.60472	0.310156	0.0186278	0.0134391	0.0504325
comp2272683_c0_seq1_m.73725	-0.162317	0.0188966	0.0135817	0.0509679
comp2276593_c0_seq3_m.82791	-0.157751	0.0189214	0.0135817	0.0509679
comp2274446_c0_seq19_m.77642	-0.250967	0.0191455	0.013708	0.0514416
comp2246502_c0_seq1_m.34680	0.288457	0.0192795	0.0137691	0.0516709
comp2270228_c0_seq1_m.68797	-0.390378	0.0193718	0.0137955	0.0517702
comp2248226_c3_seq1_m.36365	0.258121	0.0194138	0.0137955	0.0517702
comp2277388_c0_seq8_m.85093	-0.238112	0.0195769	0.0138484	0.0519687
comp2276940_c0_seq2_m.83802	-0.562283	0.0195859	0.0138484	0.0519687
comp2276783_c0_seq3_m.92635	-0.328542	0.0196495	0.0138588	0.0520076
comp2271871_c0_seq8_m.72023	-0.147632	0.0201801	0.0141977	0.0532794
comp1194294_c0_seq1_m.785	0.222093	0.0202856	0.0142366	0.0534256
comp2276804_c0_seq1_m.83376	0.5451	0.020692	0.01448	0.0543388
comp2275191_c1_seq2_m.79282	-0.17183	0.0207583	0.01448	0.0543388
comp2263115_c0_seq2_m.56831	-0.327113	0.0209192	0.01448	0.0543388
comp2279748_c0_seq1_m.91174	0.275699	0.0209405	0.01448	0.0543388
comp2268194_c0_seq1_m.65186	0.184965	0.0209561	0.01448	0.0543388
comp2273647_c0_seq2_m.75785	-0.756042	0.020993	0.01448	0.0543388
comp2271637_c0_seq1_m.71562	-0.315243	0.0210049	0.01448	0.0543388
comp2277675_c0_seq81_m.86041	-0.199976	0.021041	0.01448	0.0543388
comp2271636_c1_seq22_m.71557	0.234437	0.0212664	0.0145997	0.0547881
comp2257282_c0_seq1_m.47769	0.239957	0.021544	0.0147546	0.0553692
comp2263508_c0_seq1_m.57408	-0.323267	0.0217004	0.0148047	0.0555573
comp2254668_c0_seq2_m.44236	0.325963	0.0217217	0.0148047	0.0555573
comp2258619_c0_seq2_m.49656	0.276959	0.0225119	0.0152961	0.0574013
comp2142866_c0_seq1_m.7576	0.19975	0.0225505	0.0152961	0.0574013
comp2200530_c0_seq1_m.13009	0.376082	0.0231807	0.0156571	0.0587561
comp2271755_c0_seq2_m.71808	0.30404	0.0231932	0.0156571	0.0587561
comp2265029_c1_seq4_m.59734	0.270101	0.0235128	0.0158352	0.0594244
comp2264838_c0_seq3_m.59436	0.468978	0.0236243	0.0158725	0.0595645
comp2233700_c1_seq1_m.24550	-0.763541	0.0238384	0.0159778	0.0599595
gnl_Pdu_trscr_assembly_1_1453_m.85764	-0.20147	0.0238936	0.0159778	0.0599595
comp2275857_c0_seq4_m.80830	0.140762	0.024097	0.0160754	0.0603258
comp2271916_c0_seq1_m.72122	-0.179232	0.024153	0.0160754	0.0603258
comp1876805_c0_seq1_m.2339	-0.167806	0.0243857	0.0161699	0.0606804
comp2273778_c1_seq23_m.76059	-0.659007	0.024409	0.0161699	0.0606804
comp2275610_c0_seq1_m.80236	-0.253909	0.0246405	0.0162754	0.0610764
gnl_Pdu_trscr_assembly_1_20144_m.60515	0.171321	0.0246831	0.0162754	0.0610764
gnl_Pdu_trscr_assembly_1_15577_m.47320	0.151609	0.0251144	0.0165214	0.0619993
comp2271594_c0_seq8_m.71451	0.345853	0.0252975	0.0165895	0.062255
comp2107035_c0_seq2_m.6021	0.188633	0.025335	0.0165895	0.062255
comp2217087_c0_seq1_m.16899	-0.152161	0.0254685	0.0166385	0.0624388
comp2263347_c0_seq2_m.57195	0.211012	0.025836	0.0168398	0.0631944
comp2268473_c1_seq1_m.65668	0.374433	0.026127	0.0169632	0.0636575
comp2268978_c0_seq1_m.66540	-0.826865	0.0261708	0.0169632	0.0636575
comp2266926_c0_seq2_m.62890	0.22663	0.0262049	0.0169632	0.0636575
comp2270845_c1_seq1_m.69967	-0.221107	0.026335	0.0170086	0.063828
comp2243632_c0_seq1_m.31907	0.293658	0.0266007	0.0171412	0.0643254
comp2268391_c0_seq1_m.65566	0.188808	0.0269868	0.0173295	0.065032
comp2275616_c0_seq2_m.80253	-0.666594	0.0270369	0.0173295	0.065032
comp2250906_c0_seq2_m.39444	0.167151	0.0271119	0.0173295	0.065032
comp2268857_c0_seq2_m.66328	-0.244321	0.0271374	0.0173295	0.065032
comp2262362_c0_seq1_m.55645	0.26584	0.0273757	0.0174424	0.0654556
comp2263612_c1_seq1_m.57550	-0.155935	0.0277088	0.017615	0.0661035
comp2266830_c0_seq2_m.62753	0.171367	0.027954	0.0177217	0.0665039
comp2261971_c0_seq1_m.55022	-0.263427	0.0280016	0.0177217	0.0665039
comp2274413_c0_seq1_m.77564	-0.499032	0.0284245	0.0179493	0.0673579
comp2268874_c0_seq62_m.66354	-0.146483	0.0287447	0.0181112	0.0679653
comp2275068_c1_seq1_m.78996	0.21418	0.0291737	0.0183251	0.0687682
comp2276968_c0_seq3_m.83862	-0.176299	0.0292136	0.0183251	0.0687682
comp2272118_c0_seq11_m.72524	-0.425892	0.0294411	0.018427	0.0691507
comp2277083_c0_seq3_m.84173	-0.331542	0.0295254	0.0184391	0.069196
comp2274299_c0_seq4_m.77323	-0.140598	0.0297701	0.0184453	0.0692192
comp2261373_c0_seq1_m.54127	-0.170314	0.0297824	0.0184453	0.0692192
gnl_Pdu_trscr_assembly_1_16681_m.81096	-0.384511	0.0297855	0.0184453	0.0692192
comp2271307_c0_seq1_m.70799	0.288212	0.0297955	0.0184453	0.0692192
comp2267968_c0_seq2_m.64758	-0.344499	0.0303347	0.0187382	0.0703183
comp2276272_c0_seq2_m.81963	-0.345849	0.0306763	0.018849	0.0707342
comp2275144_c0_seq3_m.79172	-0.154334	0.0307267	0.018849	0.0707342
comp2235922_c0_seq1_m.25983	0.204411	0.0307384	0.018849	0.0707342
comp2270650_c0_seq1_m.69588	0.299485	0.03078	0.018849	0.0707342
comp2270576_c0_seq1_m.69463	-0.208454	0.0311853	0.0190374	0.0714414
comp2272435_c0_seq2_m.73201	-0.339885	0.031222	0.0190374	0.0714414
comp2277956_c0_seq3_m.87021	-0.261317	0.0313646	0.0190833	0.0716135
comp2260150_c0_seq1_m.52048	-0.185218	0.0316249	0.0192005	0.0720533
comp2271753_c0_seq2_m.71801	-0.424156	0.0318871	0.0193123	0.0724728
comp2277815_c1_seq2_m.86535	0.581377	0.0319453	0.0193123	0.0724728
comp2268046_c1_seq1_m.64874	0.191648	0.032431	0.0195642	0.0734182
comp1971911_c0_seq1_m.3786	-0.198031	0.0330152	0.019871	0.0745696
comp2273576_c0_seq1_m.75622	-0.18865	0.0330797	0.019871	0.0745696
comp2252746_c0_seq1_m.41651	0.195128	0.0332527	0.0199327	0.074801
comp2272495_c0_seq1_m.73308	0.145294	0.0336344	0.020119	0.0755
comp2265703_c0_seq1_m.60844	0.242355	0.0342197	0.0203326	0.0763017
comp1953876_c0_seq1_m.3493	-0.210065	0.0343337	0.0203326	0.0763017
comp2277005_c0_seq3_m.83943	0.334768	0.0344399	0.0203326	0.0763017
comp2273765_c1_seq6_m.76032	-0.545537	0.0344447	0.0203326	0.0763017
comp2268289_c0_seq5_m.65382	0.253777	0.0344506	0.0203326	0.0763017
comp2272876_c0_seq2_m.74167	0.477276	0.0344829	0.0203326	0.0763017
comp2269601_c0_seq3_m.67709	-0.197905	0.0344935	0.0203326	0.0763017
comp2278222_c0_seq3_m.88116	0.224671	0.0348183	0.0204814	0.0768602
comp2277951_c0_seq2_m.87004	-0.445408	0.0349545	0.020519	0.0770012
comp2271906_c0_seq1_m.72107	-0.308268	0.0351059	0.0205467	0.077105
comp2269201_c0_seq1_m.67004	0.244656	0.0351466	0.0205467	0.077105
comp2247098_c0_seq1_m.35275	-0.659704	0.0352311	0.0205537	0.0771314
comp2277769_c0_seq5_m.86350	0.175469	0.0354839	0.0206587	0.0775253
comp2267408_c0_seq1_m.63775	0.137241	0.0356269	0.0206858	0.0776271
comp2263070_c0_seq1_m.56781	0.148676	0.0356764	0.0206858	0.0776271
comp1953077_c0_seq1_m.3483	0.222106	0.036056	0.0208632	0.078293
comp2267718_c0_seq1_m.64309	-0.184291	0.0363183	0.0209722	0.0787019
comp2132126_c0_seq4_m.6558	-0.336189	0.0366061	0.0210954	0.0791644
comp2270085_c0_seq9_m.68531	-0.264059	0.0368454	0.0211483	0.0793627
comp2277413_c0_seq4_m.85165	-0.153164	0.0368607	0.0211483	0.0793627
comp2274242_c0_seq2_m.77187	0.180308	0.0369215	0.0211483	0.0793627
comp2273028_c0_seq3_m.74502	-0.410314	0.0371139	0.0211944	0.0795356
comp2260997_c1_seq7_m.53574	0.278912	0.0371515	0.0211944	0.0795356
comp2277982_c0_seq2_m.87136	-0.196279	0.0372841	0.0212273	0.0796591
comp2139115_c0_seq1_m.6894	-0.652312	0.0378252	0.021468	0.0805625
comp2273216_c0_seq3_m.74900	-0.136934	0.0378583	0.021468	0.0805625
comp2279450_c0_seq1_m.91124	-0.160871	0.0380704	0.0215238	0.0807719
comp2272320_c0_seq1_m.72954	-0.143441	0.0381085	0.0215238	0.0807719
comp2275358_c0_seq1_m.79627	-0.13802	0.0383997	0.0216321	0.0811783
comp2272519_c1_seq3_m.73361	-0.272999	0.0384529	0.0216321	0.0811783
comp2253409_c0_seq1_m.42588	-0.200389	0.0385679	0.0216539	0.0812599
gnl_Pdu_trscr_assembly_1_1514_m.69841	-0.417322	0.0387476	0.0217117	0.0814771
comp2274783_c0_seq9_m.78326	-0.35395	0.0388554	0.0217292	0.0815427
comp2276426_c0_seq2_m.82339	-0.251386	0.0391726	0.0218634	0.0820465
comp2261047_c0_seq1_m.53653	-0.387023	0.0395099	0.0220084	0.0825905
comp2267732_c0_seq2_m.64331	0.218872	0.0397763	0.0221133	0.0829843
comp2278470_c0_seq2_m.89275	-0.65584	0.0399801	0.0221832	0.0832463
comp2276936_c0_seq3_m.83786	0.406052	0.0401815	0.0222514	0.0835022
comp2268964_c0_seq1_m.66515	-0.299403	0.0402841	0.0222647	0.0835523
comp2277176_c0_seq2_m.84466	-0.348614	0.0403667	0.0222669	0.0835607
comp2266882_c0_seq1_m.62832	-0.206647	0.0405064	0.0222982	0.0836779
comp2261980_c0_seq3_m.55041	-0.291867	0.0405807	0.0222982	0.0836779
comp2278238_c1_seq2_m.88191	0.286162	0.0419897	0.0230133	0.0863616
comp2275467_c0_seq60_m.79906	0.137551	0.0420444	0.0230133	0.0863616
comp2254376_c0_seq1_m.43911	-0.337862	0.0422663	0.0230902	0.08665
comp2229921_c0_seq1_m.22367	-0.200196	0.0425644	0.0232083	0.0870933
comp2260451_c0_seq1_m.52482	-0.195892	0.0429399	0.0233681	0.0876931
comp2262300_c0_seq2_m.55547	-0.155788	0.0430648	0.0233912	0.0877796
comp2263250_c0_seq1_m.57052	0.250094	0.0434208	0.0235092	0.0882225
comp2271113_c0_seq5_m.70438	-0.286609	0.0434635	0.0235092	0.0882225
comp2278518_c0_seq1_m.89695	-0.149187	0.0435308	0.0235092	0.0882225
comp2266701_c0_seq3_m.62512	-0.886106	0.044206	0.0238041	0.089329
comp2207063_c0_seq1_m.14108	0.231271	0.0442447	0.0238041	0.089329
comp2138816_c0_seq1_m.6842	-0.303682	0.0455211	0.0244444	0.0917319
comp2258437_c0_seq2_m.49437	-0.285893	0.0457782	0.0245359	0.0920755
comp2242407_c0_seq1_m.30845	-0.387186	0.0467277	0.0249779	0.0937339
comp2276710_c0_seq15_m.83110	-0.136846	0.0467788	0.0249779	0.0937339
comp2262927_c0_seq2_m.56544	0.145844	0.0472584	0.0251865	0.0945168
comp2272378_c0_seq1_m.73076	0.152263	0.0473657	0.0251963	0.0945536
comp2275027_c0_seq1_m.78898	-0.124698	0.0479898	0.0254512	0.0955102
comp2278076_c0_seq2_m.87463	-0.299829	0.0480244	0.0254512	0.0955102
comp2265923_c0_seq1_m.61202	-0.446325	0.0484318	0.0256192	0.0961407
comp2277114_c1_seq1_m.84278	-0.38194	0.0485877	0.0256538	0.0962706
comp2228369_c0_seq1_m.21627	-0.191611	0.0487165	0.025674	0.0963463
comp2269593_c0_seq3_m.67692	-0.121677	0.048812	0.0256766	0.0963561
comp2272254_c0_seq4_m.72822	-0.168988	0.0489433	0.025698	0.0964364
comp2268942_c0_seq5_m.66483	-0.489326	0.0490445	0.0257036	0.0964572
comp2274888_c0_seq2_m.78557	-0.609003	0.0492123	0.0257191	0.0965156
comp2256252_c0_seq1_m.46348	-0.865798	0.0492556	0.0257191	0.0965156
comp2275974_c0_seq18_m.81146	-0.777894	0.0495851	0.0258436	0.0969827
comp2277972_c0_seq17_m.87106	0.154384	0.0498717	0.0259171	0.0972586
comp2274926_c0_seq2_m.78666	-0.208499	0.049909	0.0259171	0.0972586
comp2261479_c0_seq1_m.54252	-0.272148	0.0501266	0.0259825	0.0975041
gnl_Pdu_trscr_assembly_1_16061_m.43221	-0.170825	0.050318	0.0260341	0.0976977
comp2275191_c0_seq1_m.79281	-0.137004	0.0508824	0.026232	0.0984402
comp2278378_c0_seq4_m.88778	-0.588337	0.0508854	0.026232	0.0984402
comp2271257_c1_seq1_m.70699	-0.641092	0.0515064	0.0265039	0.0994605

## Sheet: PM_NM_Male vs M_NM_Male
	logFC	p.mod	q.mod	adjusted.pvalue
comp2242933_c0_seq1_m.31351	2.01384	6.76e-07	0.000216484	0.000719455
comp2272698_c0_seq4_m.73763	1.04682	5.69e-06	0.000428257	0.00142326
gene17_m.92593	1.58033	6.15e-06	0.000428257	0.00142326
gnl_Pdu_trscr_assembly_1_5530_m.58454	-0.649555	6.44e-06	0.000428257	0.00142326
comp2277815_c1_seq2_m.86535	0.84487	6.69e-06	0.000428257	0.00142326
comp2266280_c0_seq1_m.61789	0.561887	1.03e-05	0.000478267	0.00158946
comp2278062_c0_seq4_m.87412	0.658918	1.05e-05	0.000478267	0.00158946
comp2277282_c0_seq11_m.84762	0.952867	1.48e-05	0.000592156	0.00196795
comp2275110_c1_seq5_m.79090	1.0032	1.82e-05	0.000592156	0.00196795
comp2261623_c0_seq1_m.54431	-0.831546	1.91e-05	0.000592156	0.00196795
comp2276277_c0_seq18_m.81972	0.672322	2.18e-05	0.000592156	0.00196795
comp2277947_c0_seq1_m.86990	0.628663	2.27e-05	0.000592156	0.00196795
comp2272319_c0_seq24_m.72950	1.55706	2.4e-05	0.000592156	0.00196795
comp2273038_c0_seq3_m.74522	-0.648099	2.67e-05	0.000610109	0.00202762
comp2276768_c0_seq2_m.83249	0.782878	3.65e-05	0.000761733	0.00253152
comp2256095_c0_seq1_m.46136	-0.436674	4.01e-05	0.000761733	0.00253152
comp2265656_c0_seq3_m.60780	-0.994055	4.04e-05	0.000761733	0.00253152
gnl_Pdu_trscr_assembly_1_16681_m.81096	-0.469035	4.61e-05	0.000819593	0.00272381
comp2277416_c0_seq3_m.85174	-0.682836	5.46e-05	0.000879661	0.00292344
comp2277203_c0_seq4_m.84565	0.457702	5.54e-05	0.000879661	0.00292344
comp2276159_c1_seq5_m.81677	-0.42344	5.77e-05	0.000879661	0.00292344
comp2261362_c0_seq2_m.54116	-0.570657	6.91e-05	0.000942642	0.00313275
comp2232805_c0_seq1_m.23974	0.642617	7.05e-05	0.000942642	0.00313275
comp2276491_c0_seq8_m.82522	0.458765	7.07e-05	0.000942642	0.00313275
comp2271737_c1_seq2_m.71770	0.802813	7.39e-05	0.000946369	0.00314513
comp2271994_c0_seq2_m.72269	-0.921324	8.11e-05	0.000998148	0.00331721
comp2276871_c0_seq8_m.83582	0.512407	8.49e-05	0.00100624	0.0033441
comp2234282_c0_seq1_m.24908	0.701087	9.2e-05	0.00100786	0.00334951
comp2275662_c1_seq10_m.80344	-0.549422	9.31e-05	0.00100786	0.00334951
comp2277869_c0_seq29_m.86707	0.479116	9.44e-05	0.00100786	0.00334951
comp2260797_c0_seq1_m.53088	0.433495	0.000105856	0.00109324	0.00363325
comp2271381_c1_seq12_m.70942	-0.397998	0.00011085	0.00110277	0.00366492
comp2268906_c0_seq4_m.66401	-0.47206	0.000116923	0.00110277	0.00366492
comp2257395_c0_seq4_m.47951	-1.57756	0.000117112	0.00110277	0.00366492
comp2268964_c0_seq1_m.66515	-0.559002	0.00012168	0.00110972	0.003688
comp2275714_c2_seq1_m.80469	0.545852	0.000124782	0.00110972	0.003688
comp2254477_c0_seq1_m.44015	0.548122	0.000131825	0.00114067	0.00379087
comp2269060_c0_seq1_m.66718	-0.494452	0.00013843	0.00114813	0.00381565
comp2273926_c0_seq5_m.76421	-1.12955	0.000141347	0.00114813	0.00381565
comp2229729_c0_seq1_m.22264	-0.60163	0.000143446	0.00114813	0.00381565
comp2262137_c0_seq3_m.92268	-1.50112	0.000151404	0.00118227	0.00392911
comp2279213_c0_seq1_m.91075	0.394396	0.000155498	0.00118533	0.00393927
comp2274581_c1_seq21_m.92631	-0.340059	0.000167498	0.00124711	0.00414461
comp2243258_c0_seq1_m.31584	-0.805033	0.000174146	0.00125003	0.0041543
comp2265589_c0_seq2_m.60673	0.388047	0.000175739	0.00125003	0.0041543
comp2278422_c0_seq1_m.89011	0.380915	0.000182955	0.00125003	0.0041543
comp2272087_c1_seq4_m.72458	-0.400336	0.000186308	0.00125003	0.0041543
comp2262137_c0_seq4_m.55246	-1.50073	0.000188612	0.00125003	0.0041543
comp2278587_c0_seq14_m.90327	-0.572553	0.000191317	0.00125003	0.0041543
comp2264022_c0_seq13_m.58310	-0.356946	0.000196725	0.00125966	0.00418631
comp2278509_c0_seq8_m.89637	-0.632614	0.000207261	0.0012763	0.00424162
comp2277972_c0_seq17_m.87106	0.456493	0.000207297	0.0012763	0.00424162
comp1197507_c0_seq1_m.1032	0.425222	0.00022088	0.00131876	0.00438271
comp2276389_c1_seq15_m.82250	0.396467	0.000222431	0.00131876	0.00438271
comp1945561_c0_seq2_m.3380	-0.6194	0.000255398	0.00148668	0.00494078
comp2267571_c0_seq4_m.64058	0.408971	0.000267736	0.00153067	0.00508697
comp2239691_c0_seq1_m.28548	-0.904814	0.000283003	0.00158957	0.00528272
comp2272961_c0_seq1_m.74370	0.608802	0.000288292	0.00159136	0.00528867
comp2278077_c0_seq3_m.87468	0.480275	0.000297921	0.00161664	0.00537269
comp2270279_c0_seq7_m.68904	0.462119	0.000310781	0.00163304	0.00542719
comp2261395_c0_seq1_m.54150	-0.472854	0.000311145	0.00163304	0.00542719
comp2274783_c0_seq9_m.78326	-0.507563	0.00032641	0.00168552	0.00560161
comp2277132_c1_seq1_m.84335	0.325936	0.000339698	0.00170376	0.00566221
comp2275616_c0_seq2_m.80253	-0.52702	0.000340584	0.00170376	0.00566221
comp2265326_c0_seq3_m.60204	-0.865411	0.000354785	0.00174749	0.00580756
comp2275822_c0_seq10_m.80745	-0.480353	0.00036833	0.00178672	0.00593792
comp2245014_c0_seq2_m.33157	0.630019	0.000389548	0.00185107	0.00615178
comp2276523_c0_seq2_m.82609	0.534633	0.000393159	0.00185107	0.00615178
comp2269850_c0_seq1_m.68122	-0.709595	0.000406147	0.0018845	0.0062629
comp2261971_c0_seq1_m.55022	-0.41632	0.000424486	0.00191461	0.00636296
comp2262360_c0_seq1_m.55644	-0.455963	0.000424596	0.00191461	0.00636296
comp2277945_c0_seq2_m.86985	-1.69115	0.000444761	0.0019158	0.00636692
comp2263822_c0_seq1_m.57945	0.497525	0.000446058	0.0019158	0.00636692
comp2208474_c0_seq1_m.14351	0.772703	0.000449757	0.0019158	0.00636692
comp2252506_c0_seq1_m.41372	-0.378394	0.000452119	0.0019158	0.00636692
comp2275241_c0_seq5_m.79383	-0.37765	0.00045478	0.0019158	0.00636692
comp2278536_c1_seq38_m.89884	-0.619096	0.000475166	0.00197568	0.00656592
comp2278161_c0_seq3_m.87805	-0.366762	0.000484661	0.0019781	0.00657397
comp2275270_c0_seq2_m.79424	0.553048	0.000493207	0.0019781	0.00657397
comp2254641_c1_seq1_m.44200	-0.315877	0.000494283	0.0019781	0.00657397
comp2277088_c0_seq32_m.84183	-0.412777	0.000519892	0.00203368	0.00675866
gnl_Pdu_trscr_assembly_1_9334_m.28552	-0.602028	0.000524967	0.00203368	0.00675866
comp2261399_c0_seq2_m.54155	-1.18698	0.000529337	0.00203368	0.00675866
comp2268869_c0_seq6_m.66344	-1.56772	0.000533578	0.00203368	0.00675866
comp2247988_c0_seq1_m.36173	-0.464694	0.000542318	0.00204267	0.00678854
comp2271649_c0_seq1_m.71599	-0.502121	0.000555684	0.00206868	0.00687497
comp2221095_c0_seq1_m.18558	-0.587147	0.00057746	0.00208245	0.00692077
comp2275391_c0_seq1_m.79711	0.417065	0.000580058	0.00208245	0.00692077
comp2264743_c0_seq3_m.59295	-0.279384	0.000583252	0.00208245	0.00692077
comp1198575_c0_seq1_m.1066	0.455323	0.000585403	0.00208245	0.00692077
comp2254470_c0_seq1_m.44006	-0.314654	0.000601497	0.00208661	0.00693458
comp2269060_c1_seq1_m.66719	-0.527473	0.000602767	0.00208661	0.00693458
comp2203251_c0_seq1_m.13504	-0.345364	0.000606124	0.00208661	0.00693458
comp2256041_c0_seq1_m.46046	0.621986	0.000634937	0.00215371	0.00715759
gnl_Pdu_trscr_assembly_1_200732_m.91055	0.766952	0.00063907	0.00215371	0.00715759
comp1965369_c0_seq1_contamination_m.3664	0.444473	0.000655778	0.002187	0.00726821
comp1194362_c0_seq2_m.804	0.331416	0.000665087	0.00219518	0.00729539
comp2266841_c0_seq1_m.62766	-0.386035	0.000699838	0.00227036	0.00754524
comp2261876_c0_seq1_m.54865	-0.796522	0.000706132	0.00227036	0.00754524
comp2271526_c0_seq3_m.71285	0.586701	0.000709139	0.00227036	0.00754524
comp2276805_c0_seq8_m.83380	-0.647135	0.00073162	0.00231914	0.00770737
comp2272519_c1_seq3_m.73361	-0.386283	0.000774052	0.00242959	0.00807442
comp2268892_c0_seq1_m.66381	-0.632698	0.000796565	0.00246335	0.00818664
comp2274295_c0_seq2_m.77311	-1.11538	0.000800198	0.00246335	0.00818664
comp2276741_c0_seq2_m.83166	0.411229	0.000822488	0.00250786	0.00833454
comp2274541_c0_seq1_m.77862	-0.821754	0.000840419	0.00253836	0.0084359
gnl_Pdu_trscr_assembly_1_20144_m.60515	0.261934	0.000866249	0.00254724	0.0084654
comp2268336_c0_seq2_m.65472	0.254932	0.000866932	0.00254724	0.0084654
comp2276750_c0_seq1_m.83194	0.354209	0.000867226	0.00254724	0.0084654
comp1781461_c0_seq1_m.2253	-0.512355	0.000893648	0.0025734	0.00855236
comp2254167_c0_seq1_m.43587	0.491593	0.000894237	0.0025734	0.00855236
comp2263277_c0_seq1_m.57091	-0.279322	0.000902245	0.0025734	0.00855236
comp2263291_c0_seq2_m.57114	0.593487	0.000911157	0.0025734	0.00855236
comp2250550_c1_seq1_m.39064	-0.593103	0.000924597	0.0025734	0.00855236
comp2276648_c1_seq1_m.82962	-0.313745	0.000930371	0.0025734	0.00855236
gnl_Pdu_trscr_assembly_1_14069_m.67140	0.417371	0.0009324	0.0025734	0.00855236
comp2271539_c0_seq2_m.71326	0.391141	0.000941104	0.00257522	0.00855842
comp2274909_c0_seq7_m.78613	-1.71399	0.000970757	0.00262562	0.00872591
isotig10568_m.92324	-0.988296	0.000975925	0.00262562	0.00872591
comp2270797_c0_seq10_m.69872	-0.371144	0.000997904	0.00266238	0.00884809
comp2262465_c0_seq5_m.55795	-1.13711	0.00102453	0.00266827	0.00886766
gnl_Pdu_trscr_assembly_1_15590_m.29311	-1.68324	0.00102885	0.00266827	0.00886766
comp2273141_c0_seq2_m.74737	-0.585712	0.00103667	0.00266827	0.00886766
comp2277933_c1_seq7_m.86947	-0.587958	0.0010477	0.00266827	0.00886766
comp1785956_c0_seq1_m.2259	-0.427851	0.00104926	0.00266827	0.00886766
comp2278054_c0_seq40_m.87392	-0.690085	0.0010616	0.00266827	0.00886766
comp2265897_c0_seq5_m.61166	0.428741	0.0010645	0.00266827	0.00886766
gnl_Pdu_trscr_assembly_1_998_m.15062	0.353143	0.00106679	0.00266827	0.00886766
comp2275312_c0_seq8_m.79518	-0.57975	0.00111617	0.00273244	0.00908089
comp2274537_c0_seq28_m.77857	0.402865	0.00111667	0.00273244	0.00908089
comp2263873_c0_seq9_m.58029	-1.63723	0.00113076	0.00273244	0.00908089
comp2276461_c0_seq7_m.82444	-0.300588	0.00113261	0.00273244	0.00908089
comp2278010_c1_seq9_m.87231	0.362586	0.00113511	0.00273244	0.00908089
comp2274909_c0_seq7_m.78615	-1.6494	0.00122674	0.00292518	0.00972146
comp2261428_c0_seq1_m.54200	-0.252795	0.00123346	0.00292518	0.00972146
comp2261716_c0_seq2_m.54597	-0.440931	0.00124949	0.00293462	0.00975284
comp2275107_c0_seq4_m.79080	-0.26793	0.00125577	0.00293462	0.00975284
comp2249227_c0_seq1_m.37479	0.32352	0.00126731	0.00294013	0.00977113
comp2275893_c0_seq1_m.80933	0.850805	0.00128703	0.00296441	0.00985182
comp2261368_c1_seq1_m.54120	-0.254956	0.00134052	0.00306554	0.0101879
comp2272691_c0_seq4_m.73750	-1.3156	0.00136043	0.00308902	0.010266
comp2277815_c0_seq5_m.86532	0.784877	0.00139196	0.00313836	0.0104299
comp2263768_c0_seq2_m.57843	-0.264089	0.0014167	0.0031718	0.0105411
comp2266171_c0_seq1_m.61557	0.430725	0.00143233	0.00318451	0.0105833
comp2263661_c0_seq1_m.57595	-0.23614	0.00144753	0.00318586	0.0105878
comp2256220_c0_seq1_m.46316	-0.524913	0.00145283	0.00318586	0.0105878
gnl_Pdu_trscr_assembly_1_3048_m.12984	-0.398826	0.00150694	0.00326304	0.0108443
comp2266503_c0_seq6_m.62129	-0.305758	0.00150841	0.00326304	0.0108443
comp2272233_c0_seq1_m.72760	-0.253363	0.00151882	0.0032635	0.0108458
comp2224014_c0_seq1_m.19704	0.466955	0.00159745	0.00340957	0.0113313
comp2272087_c2_seq11_m.72459	-0.442833	0.00165383	0.00350652	0.0116535
comp2187328_c0_seq1_m.10936	-0.471043	0.00166834	0.00351401	0.0116783
comp2276973_c0_seq1_m.83872	0.267356	0.00169676	0.00355052	0.0117997
comp2277005_c0_seq3_m.83943	0.477046	0.00179855	0.00371803	0.0123564
comp2274106_c1_seq2_m.76871	-1.09139	0.00180004	0.00371803	0.0123564
comp2266714_c1_seq1_m.62532	0.412642	0.0018119	0.00371853	0.0123581
comp2204672_c0_seq1_m.13711	-0.273103	0.00184736	0.00376717	0.0125197
comp2232290_c0_seq2_m.23637	-1.2224	0.00191292	0.00387618	0.012882
comp2278306_c0_seq2_m.88465	-0.290783	0.00192741	0.00388097	0.0128979
comp2278238_c1_seq2_m.88191	0.369404	0.00195868	0.00391928	0.0130252
comp2272495_c0_seq1_m.73308	0.344412	0.00202473	0.00399674	0.0132826
comp2238188_c0_seq1_m.27576	0.725983	0.00203106	0.00399674	0.0132826
comp2254206_c0_seq1_m.43646	0.363751	0.00203484	0.00399674	0.0132826
comp2239022_c0_seq1_m.28102	0.740293	0.0020947	0.00407586	0.0135456
comp2250281_c0_seq1_m.38657	0.31085	0.00210058	0.00407586	0.0135456
comp2257070_c0_seq2_m.47512	-1.19475	0.00224217	0.00432437	0.0143715
comp2258554_c0_seq1_m.49568	-0.456182	0.00233436	0.00444849	0.014784
comp2267341_c0_seq1_m.63653	0.513294	0.00235878	0.00444849	0.014784
comp2279340_c0_seq1_m.91103	-0.722908	0.00235953	0.00444849	0.014784
comp2276440_c0_seq2_m.82383	-0.4659	0.00237102	0.00444849	0.014784
comp2247821_c0_seq5_m.35979	-0.444574	0.002376	0.00444849	0.014784
comp2271124_c0_seq1_m.70454	0.219833	0.00240637	0.00447915	0.0148859
comp2204754_c0_seq1_m.13720	-0.582245	0.00243527	0.00449168	0.0149275
comp2263896_c0_seq3_m.58065	0.375112	0.00244115	0.00449168	0.0149275
gnl_Pdu_trscr_assembly_1_2589_m.58494	0.256014	0.00248604	0.00454813	0.0151151
comp2277475_c0_seq2_m.85365	-0.324102	0.00250206	0.00455143	0.0151261
comp2271350_c0_seq18_m.70898	0.255203	0.002568	0.0045671	0.0151782
comp2278480_c0_seq4_m.89330	-0.605418	0.00256895	0.0045671	0.0151782
comp2277933_c1_seq7_m.86946	-0.984419	0.00257394	0.0045671	0.0151782
comp2259230_c0_seq1_m.50704	-0.22124	0.00258388	0.0045671	0.0151782
comp2273900_c0_seq1_m.76336	0.353474	0.00259304	0.0045671	0.0151782
comp2276634_c1_seq3_m.82935	0.37181	0.00259626	0.0045671	0.0151782
comp2138816_c0_seq1_m.6842	-0.52899	0.00262444	0.00457951	0.0152194
comp2278405_c0_seq22_m.88893	-0.919659	0.00263193	0.00457951	0.0152194
comp2262843_c0_seq2_m.56395	-0.237825	0.00267352	0.00462674	0.0153764
comp2262731_c0_seq1_m.56213	-0.688441	0.00269168	0.00463312	0.0153976
comp2274819_c0_seq2_m.78403	0.433364	0.00272885	0.00467198	0.0155267
comp2275905_c0_seq4_m.80965	0.687526	0.00276817	0.00471408	0.0156666
comp2269532_c0_seq13_m.67583	-0.452556	0.00278729	0.00472153	0.0156914
comp2271319_c0_seq2_m.70822	0.38486	0.00291768	0.0049164	0.016339
comp2276426_c0_seq2_m.82339	-0.332352	0.00294635	0.00493872	0.0164132
comp1194290_c0_seq1_m.781	0.894797	0.00296358	0.00494172	0.0164232
comp2251806_c0_seq1_m.40480	0.212727	0.00308053	0.00509395	0.0169291
comp2248226_c3_seq1_m.36365	0.239874	0.00309799	0.00509395	0.0169291
comp2225664_c0_seq1_m.20382	-0.456565	0.00310261	0.00509395	0.0169291
comp2206512_c0_seq1_m.14012	0.318911	0.00316676	0.00517048	0.0171834
comp2253516_c0_seq4_m.42708	-1.31474	0.00318152	0.00517048	0.0171834
comp2275542_c0_seq9_m.80087	-0.367606	0.00320899	0.00518878	0.0172442
comp2271225_c0_seq5_m.70641	-0.690391	0.00326029	0.00524439	0.0174291
gnl_Pdu_trscr_assembly_1_16061_m.43221	-0.274514	0.00327614	0.00524439	0.0174291
comp2270458_c0_seq1_m.69251	-0.256473	0.00333551	0.00530117	0.0176177
gnl_Pdu_trscr_assembly_1_2615_m.68529	0.295861	0.00334472	0.00530117	0.0176177
comp2263909_c0_seq2_m.58087	-0.269311	0.00337112	0.00531669	0.0176693
comp2267209_c0_seq1_m.63399	-0.516427	0.00350459	0.00547936	0.0182099
comp2248254_c1_seq2_m.36433	0.325336	0.00350849	0.00547936	0.0182099
comp2276498_c2_seq1_m.82546	-0.495319	0.0036683	0.00570112	0.0189469
gnl_Pdu_trscr_assembly_1_12794_m.61443	-0.912089	0.00373083	0.00575896	0.0191392
comp2271168_c0_seq1_m.70546	-0.218607	0.00374149	0.00575896	0.0191392
comp2257674_c0_seq1_m.48339	-0.878456	0.00379367	0.00578755	0.0192342
comp2278480_c1_seq1_m.89333	-0.57308	0.00379621	0.00578755	0.0192342
comp2262281_c0_seq3_m.55504	-0.891666	0.00384355	0.00581167	0.0193143
comp2242407_c0_seq1_m.30845	-1.07775	0.00384834	0.00581167	0.0193143
comp2278222_c0_seq3_m.88116	0.230281	0.00392099	0.00589358	0.0195866
comp2274787_c0_seq1_m.78332	0.236298	0.00401595	0.00600811	0.0199672
comp2272437_c1_seq1_m.73204	0.921941	0.00405215	0.00603406	0.0200534
comp2248808_c0_seq2_m.37043	-0.656977	0.00414258	0.00612242	0.0203471
comp2273865_c0_seq2_m.76255	0.475006	0.00414973	0.00612242	0.0203471
comp2273595_c0_seq1_m.75667	-0.30976	0.00425745	0.00625253	0.0207795
comp2272491_c1_seq4_m.73302	0.240136	0.00428484	0.00626402	0.0208177
comp2278589_c0_seq3_m.90346	-0.248243	0.00431017	0.00626563	0.020823
gnl_Pdu_trscr_assembly_1_326_m.78835	-0.315675	0.00432508	0.00626563	0.020823
comp2141997_c0_seq1_m.7386	-0.915554	0.00442647	0.00638363	0.0212152
comp2244716_c0_seq1_m.32883	-0.243684	0.00448935	0.00643727	0.0213934
comp2274413_c0_seq1_m.77564	-0.501111	0.00450694	0.00643727	0.0213934
comp2272169_c2_seq2_m.72626	-0.23977	0.00453412	0.00643727	0.0213934
comp2272724_c0_seq1_m.73818	-0.222806	0.00454409	0.00643727	0.0213934
comp2277769_c0_seq5_m.86350	0.274227	0.00457163	0.00644775	0.0214283
comp2275720_c0_seq4_m.80482	0.235854	0.00461299	0.00647076	0.0215047
comp2273647_c0_seq2_m.75785	-0.703136	0.00467152	0.00647076	0.0215047
gnl_Pdu_trscr_assembly_1_1986_m.5697	-0.223053	0.00467653	0.00647076	0.0215047
gnl_Pdu_trscr_assembly_1_7327_m.81715	0.326955	0.00468662	0.00647076	0.0215047
comp2246502_c0_seq1_m.34680	0.277187	0.004689	0.00647076	0.0215047
comp2276804_c0_seq1_m.83376	0.436975	0.0047369	0.0065088	0.0216312
comp2250533_c0_seq1_m.39039	-0.196738	0.0048117	0.0065823	0.0218754
comp2277724_c0_seq10_m.86198	-0.379829	0.00483151	0.0065823	0.0218754
comp2277312_c0_seq10_m.84862	0.261463	0.00488161	0.00662238	0.0220086
comp2271257_c1_seq1_m.70699	-0.576038	0.00494519	0.00668033	0.0222012
comp2266801_c0_seq2_m.62707	0.269979	0.005151	0.00692911	0.023028
comp2269230_c0_seq2_m.67055	-0.286999	0.00517446	0.00693155	0.0230361
comp2275701_c1_seq1_m.80440	-0.533946	0.00523034	0.00695463	0.0231128
comp2271595_c0_seq2_m.71452	-0.29471	0.0052436	0.00695463	0.0231128
comp2277501_c0_seq23_m.85461	-0.3723	0.00526619	0.00695463	0.0231128
comp2263667_c0_seq1_m.57601	0.405598	0.00529538	0.00695463	0.0231128
comp2274137_c1_seq25_m.76929	0.994185	0.00530031	0.00695463	0.0231128
comp2275153_c0_seq1_m.79199	-0.197076	0.00532936	0.00696422	0.0231447
comp2275759_c0_seq17_m.80560	0.208771	0.00545487	0.00709384	0.0235754
comp2260394_c0_seq1_m.52394	0.360755	0.00547287	0.00709384	0.0235754
gnl_Pdu_trscr_assembly_1_200732_m.91056	0.840115	0.00553844	0.00714988	0.0237617
comp2276302_c0_seq1_m.82036	0.189341	0.00565111	0.00726603	0.0241477
comp2266869_c0_seq1_m.62813	-0.217754	0.00579297	0.00739064	0.0245618
comp2269374_c0_seq3_m.67298	-0.216874	0.00581978	0.00739064	0.0245618
comp2267968_c0_seq2_m.64758	-0.52034	0.00583758	0.00739064	0.0245618
comp2276940_c0_seq2_m.83802	-0.307196	0.00584036	0.00739064	0.0245618
comp2277142_c0_seq6_m.84365	-0.52519	0.00589712	0.00743308	0.0247029
comp2272293_c0_seq1_m.72898	0.21653	0.00598661	0.0075163	0.0249794
comp2268874_c0_seq62_m.66354	-0.170486	0.00613349	0.00765491	0.0254401
comp2257585_c0_seq1_m.48216	-0.395784	0.00614483	0.00765491	0.0254401
comp2232641_c0_seq7_m.23875	0.326151	0.00617282	0.00765997	0.0254569
comp2245721_c0_seq1_m.33844	0.397146	0.00644903	0.00797182	0.0264933
comp2269297_c0_seq2_m.67181	0.515937	0.00652296	0.00803219	0.0266939
comp2273599_c0_seq7_m.75677	-0.621437	0.00662673	0.00812871	0.0270147
comp2273813_c0_seq2_m.76128	-0.286423	0.0067545	0.00823855	0.0273798
comp2257070_c0_seq2_m.47513	-0.707992	0.00680663	0.00823855	0.0273798
comp2276783_c0_seq3_m.92635	-0.293736	0.00681318	0.00823855	0.0273798
comp2245053_c0_seq1_m.33185	-0.47326	0.00681921	0.00823855	0.0273798
comp2257633_c0_seq1_m.48279	0.188226	0.0069258	0.00833588	0.0277032
comp2138952_c0_seq1_m.6867	-0.426013	0.006988	0.00837924	0.0278473
comp2268340_c1_seq1_m.65478	-0.19906	0.00708016	0.00845807	0.0281093
comp2277995_c0_seq1_m.87177	-0.532068	0.00716642	0.00852929	0.028346
comp2236614_c0_seq1_m.26450	-0.986556	0.00759228	0.00900267	0.0299192
comp2267169_c0_seq1_m.63315	0.430239	0.00769772	0.00909401	0.0302228
comp2263394_c0_seq1_m.57263	-0.512244	0.00792105	0.00932345	0.0309853
comp2274242_c0_seq2_m.77187	0.227343	0.00800544	0.00938826	0.0312007
comp2266882_c0_seq1_m.62832	-0.254215	0.00814882	0.00952154	0.0316436
comp2277729_c0_seq10_m.86207	-0.715576	0.008227	0.00957794	0.031831
gi_613484551	-0.576568	0.00837113	0.00971042	0.0322713
comp2277911_c0_seq5_m.86869	0.324632	0.00848883	0.0098114	0.0326069
comp2250201_c0_seq1_m.38525	-0.189251	0.0086094	0.00987719	0.0328256
comp1199432_c0_seq1_m.1095	0.250208	0.00865613	0.00987719	0.0328256
comp2263115_c0_seq2_m.56831	-0.303372	0.00868591	0.00987719	0.0328256
comp2264302_c0_seq2_m.58699	-0.226732	0.00869741	0.00987719	0.0328256
comp2274258_c1_seq4_m.77217	0.224898	0.00870403	0.00987719	0.0328256
comp2277977_c1_seq3_m.87126	-0.219005	0.00873543	0.00987719	0.0328256
comp2278554_c0_seq4_m.90013	-0.281872	0.00876171	0.00987719	0.0328256
comp2262300_c0_seq2_m.55547	-0.208296	0.00881168	0.00989867	0.0328969
comp2258609_c0_seq1_m.49647	-0.23658	0.00885533	0.00990081	0.0329041
comp2233700_c1_seq1_m.24550	-0.762965	0.00887544	0.00990081	0.0329041
comp2139115_c0_seq1_m.6894	-0.801137	0.00905459	0.0100656	0.0334517
comp2261183_c0_seq1_m.53867	-0.362111	0.00916598	0.0101542	0.033746
comp2278031_c0_seq2_m.87291	0.205719	0.00927996	0.010245	0.0340479
gnl_Pdu_trscr_assembly_1_11607_m.26425	-0.234285	0.00934475	0.0102811	0.0341678
comp2276668_c0_seq1_m.83017	0.243914	0.00938625	0.0102913	0.0342019
comp1910314_c0_seq1_m.2848	0.275798	0.00955194	0.0104373	0.0346869
gnl_Pdu_trscr_assembly_1_18157_m.24773	-0.185647	0.00961337	0.0104687	0.0347913
comp2272371_c0_seq1_m.73054	-0.174042	0.00982853	0.0106456	0.0353794
comp2272876_c0_seq2_m.74167	0.369126	0.0098424	0.0106456	0.0353794
comp2277413_c0_seq4_m.85165	-0.29798	0.00988009	0.0106504	0.0353953
comp2265255_c2_seq1_m.60100	-0.484853	0.0100835	0.0107981	0.0358861
comp2197446_c0_seq1_m.12404	-0.205629	0.0100845	0.0107981	0.0358861
comp2275068_c1_seq1_m.78996	0.211993	0.0101327	0.0108037	0.0359048
comp2247098_c0_seq1_m.35275	-0.984081	0.0101573	0.0108037	0.0359048
comp2272182_c0_seq2_m.72649	-0.23195	0.0102542	0.0108707	0.0361273
comp2278362_c0_seq1_m.88712	-0.172674	0.0103091	0.0108928	0.0362009
comp2265885_c0_seq3_m.61143	-0.606379	0.0104006	0.0109176	0.0362832
comp2256252_c0_seq1_m.46348	-1.1879	0.0104007	0.0109176	0.0362832
comp2223962_c0_seq7_m.19686	0.201063	0.0105485	0.0110365	0.0366784
comp2269171_c0_seq3_m.66933	0.401183	0.0106383	0.0110943	0.0368704
comp2246514_c1_seq1_m.34691	-0.223545	0.0106837	0.0111054	0.0369075
comp2258193_c0_seq1_m.49089	0.180115	0.0108476	0.0112393	0.0373523
comp2269987_c0_seq2_m.68354	-0.304262	0.01099	0.0113422	0.0376945
comp2254496_c0_seq2_m.44030	-0.19864	0.0110563	0.0113422	0.0376945
comp2265703_c0_seq1_m.60844	0.239251	0.0110563	0.0113422	0.0376945
comp2140166_c0_seq1_m.7086	0.225939	0.0110887	0.0113422	0.0376945
comp2271419_c1_seq1_m.71009	-0.252591	0.0111671	0.0113618	0.0377593
comp2274806_c0_seq1_m.78376	-0.694906	0.0111787	0.0113618	0.0377593
comp2270148_c0_seq3_m.68661	0.283204	0.0112303	0.011378	0.0378134
comp2222959_c0_seq1_m.19328	0.462176	0.011266	0.0113782	0.0378139
comp2271350_c0_seq18_m.70897	0.522509	0.0115645	0.0115772	0.0384753
comp2270044_c0_seq2_m.68460	0.191932	0.0115679	0.0115772	0.0384753
comp2271636_c1_seq22_m.71557	0.27622	0.0115773	0.0115772	0.0384753
comp2271244_c0_seq1_m.70676	-0.283804	0.0116396	0.0115772	0.0384753
comp2269321_c1_seq1_m.67212	0.183558	0.0116438	0.0115772	0.0384753
comp2264838_c0_seq3_m.59436	0.329962	0.0118682	0.0117638	0.0390954
comp2263612_c1_seq1_m.57550	-0.183937	0.0119435	0.0117654	0.0391008
comp2276577_c0_seq8_m.92288	-0.561915	0.0120008	0.0117654	0.0391008
comp2268115_c0_seq2_m.65034	0.278148	0.0120068	0.0117654	0.0391008
comp2273778_c1_seq23_m.76059	-0.644875	0.0120169	0.0117654	0.0391008
comp2276412_c0_seq1_m.82311	0.160822	0.0120901	0.011801	0.0392191
comp2276719_c0_seq5_m.83124	0.473216	0.0121644	0.0118374	0.03934
comp2198016_c0_seq1_m.12499	-0.21348	0.0122427	0.011856	0.0394019
comp2267691_c0_seq1_m.64257	-0.155856	0.0122575	0.011856	0.0394019
comp2276442_c0_seq1_m.82386	-0.159725	0.0122964	0.0118577	0.0394076
comp2269601_c0_seq3_m.67709	-0.226784	0.0130655	0.0125616	0.041747
comp2279445_c0_seq1_m.91120	-0.534239	0.0132959	0.0127449	0.0423559
comp2347711_c0_seq1_contamination_m.91628	0.153252	0.013469	0.0128641	0.042752
comp2274036_c0_seq6_m.76723	0.229941	0.0135006	0.0128641	0.042752
comp2263347_c0_seq2_m.57195	0.229305	0.0136993	0.0129825	0.0431455
comp2278534_c0_seq1_m.89879	-0.211569	0.013706	0.0129825	0.0431455
comp2261980_c0_seq3_m.55041	-0.377592	0.0138094	0.0130419	0.0433429
comp2278378_c0_seq4_m.88778	-0.576177	0.0142966	0.0134623	0.0447401
comp2278268_c0_seq9_m.88316	-0.183479	0.0143628	0.0134849	0.0448153
comp2271567_c0_seq1_m.71391	-0.496835	0.0146247	0.01369	0.0454968
comp2268336_c1_seq1_m.65474	0.311568	0.0146667	0.01369	0.0454968
comp2228369_c0_seq1_m.21627	-0.226206	0.0147219	0.0136933	0.0455079
comp1196959_c0_seq2_m.1014	-0.370222	0.0147559	0.0136933	0.0455079
comp2274301_c0_seq6_m.77327	-0.186569	0.014921	0.0138057	0.0458813
comp2252186_c0_seq3_m.40915	0.642646	0.0149632	0.0138057	0.0458813
comp2264066_c0_seq3_m.58370	-0.239347	0.0150222	0.013807	0.0458858
tuba_m.92505	0.227345	0.0150509	0.013807	0.0458858
comp2275467_c0_seq60_m.79906	0.190653	0.0151322	0.0138419	0.0460018
comp1953077_c0_seq1_m.3483	0.296172	0.015505	0.0141426	0.0470009
comp2270119_c0_seq15_m.68605	-0.2286	0.0155727	0.0141639	0.047072
comp2261379_c0_seq1_m.54133	-0.656574	0.0158673	0.014374	0.0477702
comp2272807_c0_seq4_m.74003	-0.194186	0.0158935	0.014374	0.0477702
comp2266701_c0_seq3_m.62512	-1.24688	0.0160438	0.0144692	0.0480863
comp2278605_c1_seq8_m.90480	-0.574251	0.0161242	0.0145008	0.0481914
comp2259349_c0_seq2_m.50877	-0.32173	0.0163417	0.0146552	0.0487045
comp2271753_c0_seq2_m.71801	-0.450781	0.016569	0.0148175	0.0492441
comp2273845_c0_seq2_m.76206	0.34669	0.0170067	0.0151655	0.0504006
comp2278012_c0_seq11_m.87235	-0.70641	0.0170528	0.0151655	0.0504006
comp2277352_c0_seq3_m.84974	-0.30211	0.0171775	0.0152341	0.0506285
comp2258349_c0_seq1_m.49322	-0.172619	0.0172307	0.015239	0.0506448
comp2270517_c0_seq1_m.69357	0.142628	0.0174311	0.0153738	0.0510929
comp2253856_c0_seq1_m.43254	0.146921	0.0175682	0.0154521	0.0513531
comp2278376_c0_seq1_m.88768	-0.285803	0.017882	0.0155779	0.0517711
comp2269848_c0_seq4_m.68115	-0.398012	0.0179155	0.0155779	0.0517711
comp2275167_c0_seq1_m.79227	-0.206642	0.0179942	0.0155779	0.0517711
comp2278308_c1_seq12_m.88483	-0.20149	0.0180239	0.0155779	0.0517711
comp2274693_c0_seq1_m.78142	-0.213654	0.0180306	0.0155779	0.0517711
comp2269110_c0_seq3_m.66810	0.222697	0.0180842	0.0155779	0.0517711
comp2247229_c0_seq1_m.35389	0.207775	0.0181078	0.0155779	0.0517711
comp2228430_c0_seq1_m.21640	-0.166245	0.0181209	0.0155779	0.0517711
comp2267011_c0_seq2_m.63019	-0.186457	0.0181491	0.0155779	0.0517711
comp2277388_c0_seq8_m.85092	-0.341571	0.0182423	0.015616	0.0518978
comp2275933_c0_seq1_m.81045	-0.465536	0.0183876	0.0156897	0.0521426
comp2273142_c0_seq1_m.74744	0.14719	0.0184263	0.0156897	0.0521426
comp1977957_c0_seq1_m.3878	-0.307722	0.0185499	0.015753	0.0523529
comp2278454_c0_seq1_m.89160	-0.371914	0.0191042	0.016168	0.0537323
comp2269627_c0_seq2_m.67749	-0.218758	0.0191396	0.016168	0.0537323
comp2265077_c0_seq1_m.59810	0.187671	0.0193389	0.0162893	0.0541354
comp2270228_c0_seq1_m.68797	-0.401662	0.019385	0.0162893	0.0541354
comp2268225_c0_seq5_m.65245	-0.364284	0.0195278	0.0163664	0.0543915
comp2211414_c0_seq1_m.14992	-0.239096	0.0196707	0.0164431	0.0546466
comp2234809_c0_seq1_m.25266	0.218128	0.0200104	0.0166835	0.0554455
comp2267718_c0_seq1_m.64309	-0.205871	0.0209622	0.0174317	0.057932
comp2275508_c1_seq3_m.80009	-0.312403	0.0211123	0.0174681	0.0580529
comp2243632_c0_seq1_m.31907	0.24278	0.0211946	0.0174681	0.0580529
comp2262185_c0_seq1_m.55318	-0.359398	0.0211985	0.0174681	0.0580529
comp2265328_c0_seq2_m.60206	0.260264	0.0212574	0.0174681	0.0580529
comp2258619_c0_seq2_m.49656	0.217855	0.0213637	0.0174681	0.0580529
comp2276825_c0_seq1_m.83424	-0.238331	0.0213649	0.0174681	0.0580529
comp2273257_c0_seq9_m.74986	0.53301	0.0213879	0.0174681	0.0580529
comp2268978_c0_seq1_m.66540	-0.694564	0.0215393	0.017547	0.0583151
comp2259963_c0_seq1_m.51818	-0.232818	0.021715	0.0176452	0.0586415
comp2265049_c0_seq3_m.59764	-0.328171	0.0220129	0.0178094	0.0591873
comp2271906_c0_seq1_m.72107	-0.256445	0.0220948	0.0178094	0.0591873
comp2265464_c0_seq1_m.60472	0.274677	0.0221565	0.0178094	0.0591873
comp2278194_c0_seq1_m.87981	-0.22517	0.0221684	0.0178094	0.0591873
comp2269698_c0_seq1_m.67864	-0.333015	0.0221953	0.0178094	0.0591873
comp2110333_c0_seq1_m.6080	-0.248087	0.02239	0.0179208	0.0595575
comp2268942_c0_seq5_m.66483	-0.446023	0.0224933	0.0179527	0.0596635
comp2274888_c0_seq2_m.78557	-0.569802	0.0225422	0.0179527	0.0596635
comp2265997_c0_seq1_m.61310	0.14313	0.0226201	0.0179527	0.0596635
comp2273628_c0_seq6_m.75728	-0.134375	0.0226542	0.0179527	0.0596635
comp2275191_c0_seq1_m.79281	-0.181435	0.0228406	0.0180557	0.0600058
comp2278470_c0_seq2_m.89275	-0.552932	0.0233652	0.018425	0.061233
comp2277951_c0_seq2_m.87004	-0.460799	0.023682	0.0186289	0.0619107
comp2277388_c0_seq8_m.85093	-0.312819	0.0239076	0.0187603	0.0623473
comp2273385_c0_seq1_m.75218	-0.233714	0.0242086	0.01895	0.0629779
comp2261047_c0_seq1_m.53653	-0.324694	0.0244981	0.0191298	0.0635755
comp2277740_c0_seq2_m.86258	0.281556	0.0248736	0.0193758	0.064393
comp2272882_c0_seq14_m.74184	0.679551	0.0249787	0.0194104	0.064508
comp2268172_c0_seq1_m.65149	0.338042	0.0252302	0.0195584	0.0649997
comp2263921_c0_seq2_m.58101	-0.394747	0.0253994	0.019642	0.0652776
comp2273356_c0_seq1_m.75157	-0.156464	0.02571	0.0198343	0.0659166
comp2258554_c1_seq2_m.49570	-0.483087	0.0258704	0.0199101	0.0661685
comp2269009_c0_seq1_m.66627	0.195052	0.0260433	0.0199951	0.066451
comp2277311_c0_seq3_m.84858	-0.679497	0.0261143	0.0200016	0.0664728
gnl_Pdu_trscr_assembly_1_20792_m.71829	0.171322	0.026182	0.0200056	0.0664861
comp2263658_c0_seq3_m.57592	-0.302589	0.0262477	0.020008	0.0664941
comp2189372_c0_seq1_m.11219	0.21087	0.0263676	0.0200517	0.0666394
comp2270432_c0_seq1_m.69185	-0.166603	0.0264687	0.0200809	0.0667362
comp2275974_c0_seq18_m.81146	-0.754947	0.0265671	0.0201079	0.066826
comp2271909_c0_seq2_m.72111	0.193645	0.026778	0.0202197	0.0671977
comp2261150_c0_seq1_m.53829	-0.159694	0.027058	0.0203831	0.0677405
gnl_Pdu_trscr_assembly_1_19681_m.92605	0.169363	0.0271942	0.0204376	0.0679216
comp2253149_c0_seq1_m.42245	0.23037	0.0274433	0.020564	0.0683417
comp2271667_c0_seq1_m.71637	-0.154693	0.0274908	0.020564	0.0683417
comp2268473_c1_seq1_m.65668	0.405616	0.0280169	0.0209086	0.0694871
comp2272299_c0_seq11_m.72914	-0.183661	0.02821	0.0210038	0.0698034
comp2273193_c0_seq1_m.74830	-0.348487	0.0283334	0.0210467	0.0699461
comp2254376_c0_seq1_m.43911	-0.225687	0.0286193	0.0212099	0.0704884
comp2277847_c1_seq10_m.86637	0.167941	0.0288138	0.0213047	0.0708035
comp2226333_c0_seq1_m.20670	0.198417	0.029064	0.0214402	0.0712536
comp2277351_c1_seq2_m.84968	-0.21788	0.0292774	0.021548	0.0716119
comp2280536_c0_seq1_m.91231	0.305405	0.029411	0.0215966	0.0717736
comp2277617_c1_seq7_m.85877	0.16462	0.030153	0.0220778	0.0733726
comp2236007_c0_seq2_m.26049	0.309975	0.0302041	0.0220778	0.0733726
comp2276377_c0_seq2_m.82218	0.202734	0.0305912	0.0223098	0.0741436
comp2260997_c1_seq7_m.53574	0.212672	0.0307626	0.0223299	0.0742104
comp2272782_c0_seq2_m.73955	0.376277	0.0308227	0.0223299	0.0742104
comp2261373_c0_seq1_m.54127	-0.145517	0.030828	0.0223299	0.0742104
comp2269738_c0_seq1_m.67939	0.179604	0.0310318	0.0224053	0.074461
comp2260519_c0_seq10_m.52611	0.206846	0.0311316	0.0224053	0.074461
comp2274031_c0_seq3_m.76707	-0.185209	0.031142	0.0224053	0.074461
comp2236992_c0_seq1_m.26663	0.145234	0.0314362	0.0225662	0.0749957
comp2270845_c1_seq1_m.69967	-0.245983	0.0316608	0.0226765	0.0753625
comp2277313_c0_seq3_m.84866	0.187534	0.0321487	0.0229747	0.0763533
comp2272641_c0_seq2_m.73619	-0.115436	0.0328565	0.0234282	0.0778604
comp2270926_c0_seq1_m.70120	0.198882	0.0332243	0.0236378	0.078557
comp2272254_c0_seq4_m.72822	-0.377909	0.0336978	0.0239215	0.0794999
comp2265883_c1_seq1_m.61140	0.223111	0.0342144	0.0242345	0.0805402
comp2277675_c0_seq81_m.86041	-0.123843	0.0343815	0.0242991	0.0807548
gnl_Pdu_trscr_assembly_1_3867_m.65412	-0.98158	0.0347773	0.0245246	0.0815044
comp2253875_c0_seq1_m.43271	-0.244529	0.0349432	0.0245875	0.0817133
comp2211270_c0_seq1_m.14951	-0.193956	0.035231	0.0247357	0.0822057
comp1234630_c0_seq1_m.1254	0.152572	0.0353261	0.0247382	0.0822142
comp2269580_c0_seq1_m.67656	0.175776	0.0353892	0.0247382	0.0822142
comp2278273_c0_seq4_m.88339	-0.219483	0.0359871	0.0251014	0.0834211
comp2275833_c0_seq1_m.80771	0.145884	0.0362932	0.0252072	0.083773
comp2262339_c0_seq1_m.55609	0.316091	0.0362964	0.0252072	0.083773
comp2274259_c0_seq1_m.77220	-0.181876	0.036379	0.02521	0.083782
comp2276498_c0_seq1_m.82544	-0.240592	0.0369626	0.0255591	0.0849422
comp2276272_c0_seq2_m.81963	-0.330868	0.0372248	0.0256849	0.0853603
comp2280178_c0_seq1_m.91219	-0.506392	0.0376054	0.0258917	0.0860476
comp2256770_c0_seq1_m.46959	0.2187	0.0377347	0.0259098	0.086108
comp2257693_c0_seq3_m.48359	0.203793	0.0378856	0.0259098	0.086108
comp2268857_c0_seq2_m.66328	-0.112146	0.037943	0.0259098	0.086108
comp2250470_c0_seq1_m.38949	0.151699	0.0379845	0.0259098	0.086108
comp2269906_c0_seq2_m.68214	0.330173	0.0380991	0.0259098	0.086108
comp2269324_c0_seq1_m.67217	0.203236	0.0381173	0.0259098	0.086108
comp2268441_c0_seq1_m.65632	0.425277	0.0387201	0.0262078	0.0870982
comp2217905_c0_seq1_m.17239	-0.196072	0.0387771	0.0262078	0.0870982
comp2275610_c0_seq1_m.80236	-0.256304	0.0388013	0.0262078	0.0870982
comp2231610_c0_seq1_m.23229	0.129088	0.0395114	0.0266312	0.0885055
comp1971911_c0_seq1_m.3786	-0.181653	0.0397885	0.0267617	0.088939
comp2266755_c0_seq1_m.62616	0.124195	0.0401984	0.0269734	0.0896425
comp1916779_c0_seq1_m.2944	-0.120046	0.0402717	0.0269734	0.0896425
gnl_Pdu_trscr_assembly_1_1512_m.69248	-0.318723	0.0405997	0.0270894	0.0900279
comp2276031_c0_seq51_m.81296	-0.174535	0.0406392	0.0270894	0.0900279
comp2279450_c0_seq1_m.91124	-0.159663	0.0407094	0.0270894	0.0900279
comp2274358_c0_seq3_m.77437	0.145823	0.0408121	0.0270894	0.0900279
comp2265923_c0_seq1_m.61202	-0.364265	0.0408679	0.0270894	0.0900279
comp2275857_c0_seq4_m.80830	0.185877	0.0416674	0.0275168	0.0914484
comp2262740_c0_seq13_m.56232	-0.154839	0.0416905	0.0275168	0.0914484
comp2245960_c0_seq1_m.34133	-0.329253	0.0417706	0.0275168	0.0914484
comp2233777_c0_seq1_m.24586	-0.128962	0.042345	0.0277672	0.0922806
comp2274043_c0_seq7_m.76739	-0.233134	0.0424678	0.0277672	0.0922806
comp2241424_c0_seq3_m.29932	-0.370948	0.0424731	0.0277672	0.0922806
comp2274999_c0_seq4_m.78837	-0.167124	0.0425139	0.0277672	0.0922806
comp2277230_c0_seq15_m.84634	-0.124286	0.0426189	0.0277672	0.0922806
comp2275853_c0_seq1_m.80817	-0.185023	0.0426711	0.0277672	0.0922806
comp2072973_c0_seq1_m.5296	-0.156336	0.0427873	0.0277863	0.0923442
comp2254346_c0_seq1_m.43876	-0.621268	0.0430883	0.0278841	0.0926691
comp2276151_c0_seq3_m.81648	-0.185768	0.0431276	0.0278841	0.0926691
comp2263508_c0_seq1_m.57408	-0.27725	0.0431991	0.0278841	0.0926691
comp2276882_c0_seq4_m.83609	0.190557	0.0433942	0.0279536	0.0929002
comp2275495_c0_seq1_m.79975	0.185202	0.0439635	0.0281946	0.093701
gnl_Pdu_trscr_assembly_1_12504_m.67029	-0.110396	0.0440057	0.0281946	0.093701
comp2278623_c0_seq6_m.90693	-0.243243	0.0440324	0.0281946	0.093701
comp2269345_c0_seq1_m.67253	-0.256133	0.0445375	0.0284558	0.0945693
comp2271944_c0_seq11_m.72172	-0.271469	0.0446182	0.0284558	0.0945693
comp2268903_c0_seq4_m.66397	-0.109161	0.0448657	0.0285518	0.0948881
comp2143411_c0_seq1_m.7656	0.199561	0.0449516	0.0285518	0.0948881
comp2254418_c0_seq1_m.43945	0.213382	0.0450362	0.0285518	0.0948881
comp2261121_c0_seq1_m.53764	0.23656	0.0452289	0.0285922	0.0950224
comp2261058_c0_seq1_m.53667	0.166376	0.0452786	0.0285922	0.0950224
comp2266507_c0_seq10_m.62138	0.138974	0.045972	0.028973	0.0962878
gnl_Pdu_trscr_assembly_1_1514_m.69841	-0.247157	0.0464383	0.0292093	0.0970733
comp2258527_c0_seq1_m.49534	-0.18644	0.0468595	0.0294165	0.0977618
comp2258014_c0_seq1_m.48797	-0.531788	0.0471053	0.0295129	0.0980822
comp2279297_c0_seq1_m.91091	0.141904	0.047308	0.029582	0.098312
comp2269814_c0_seq1_m.68069	-0.167666	0.0475275	0.0296613	0.0985756
comp2274238_c3_seq9_m.77182	0.180015	0.0478717	0.029818	0.0990962
gnl_Pdu_trscr_assembly_1_1644_m.62862	-0.143934	0.0481407	0.0299273	0.0994595
comp2251594_c0_seq1_m.40214	0.277916	0.048382	0.0300191	0.0997645

## Sheet: IM_FRFM vs PM_FRFM_Female
	logFC	p.mod	q.mod	adjusted.pvalue
comp2274909_c0_seq7_m.78613	1.74395	2.32e-06	0.000651567	0.00158146
comp2237468_c0_seq1_m.27022	-2.19672	5.31e-06	0.000651567	0.00158146
comp2275893_c0_seq1_m.80933	-1.55455	5.86e-06	0.000651567	0.00158146
comp2274909_c0_seq7_m.78615	1.84241	7.43e-06	0.000651567	0.00158146
comp2271737_c1_seq2_m.71770	-1.82857	8.22e-06	0.000651567	0.00158146
comp2272691_c0_seq4_m.73750	1.18794	9.34e-06	0.000651567	0.00158146
comp2189372_c0_seq1_m.11219	-1.62063	1.21e-05	0.000651567	0.00158146
gnl_Pdu_trscr_assembly_1_200732_m.91056	-1.69236	1.29e-05	0.000651567	0.00158146
gnl_Pdu_trscr_assembly_1_15590_m.29311	1.9295	1.34e-05	0.000651567	0.00158146
comp2265656_c0_seq3_m.60780	1.13979	1.72e-05	0.000700751	0.00170084
comp2208474_c0_seq1_m.14351	-1.332	1.84e-05	0.000700751	0.00170084
comp2273926_c0_seq5_m.76421	1.24102	1.92e-05	0.000700751	0.00170084
comp2257070_c0_seq2_m.47512	1.28126	2.15e-05	0.000712067	0.00172831
comp2272437_c1_seq1_m.73204	-2.34384	2.27e-05	0.000712067	0.00172831
comp2223962_c0_seq7_m.19686	-1.09316	2.73e-05	0.000796851	0.00193409
gnl_Pdu_trscr_assembly_1_12794_m.61443	0.981855	3.14e-05	0.000859345	0.00208577
comp2275714_c2_seq1_m.80469	-1.03794	4.33e-05	0.0011176	0.00271259
comp2278010_c1_seq9_m.87231	-1.01886	4.91e-05	0.00117717	0.00285718
comp2264888_c0_seq4_m.59493	1.21405	5.1e-05	0.00117717	0.00285718
comp2271594_c0_seq8_m.71451	-0.851474	7.09e-05	0.00154426	0.00374817
comp2277374_c0_seq2_m.85051	0.944533	7.83e-05	0.00154426	0.00374817
comp2271419_c1_seq1_m.71009	0.983062	8.32e-05	0.00154426	0.00374817
comp2268978_c0_seq1_m.66540	0.942516	8.42e-05	0.00154426	0.00374817
comp2280591_c0_seq1_m.91233	1.09886	8.45e-05	0.00154426	0.00374817
comp2275853_c0_seq1_m.80817	0.854104	9.3e-05	0.00163134	0.00395953
comp2254346_c0_seq1_m.43876	1.01128	0.000102709	0.00173172	0.00420317
comp2269321_c1_seq1_m.67212	-1.01616	0.000122214	0.00197202	0.00478642
comp2257585_c0_seq1_m.48216	0.947365	0.000130213	0.00197202	0.00478642
comp2229729_c0_seq1_m.22264	1.03748	0.000130457	0.00197202	0.00478642
comp2269185_c0_seq2_m.66963	-1.27241	0.000150458	0.00219855	0.00533624
comp2266841_c0_seq1_m.62766	0.99339	0.000160565	0.00227055	0.005511
comp1194290_c0_seq1_m.781	-1.32722	0.000171273	0.00234629	0.00569484
comp2245014_c0_seq2_m.33157	-1.10945	0.000188998	0.00251064	0.00609374
comp1196959_c0_seq2_m.1014	0.907404	0.000196317	0.00253117	0.00614356
comp2278480_c0_seq4_m.89330	0.791649	0.000203469	0.00254842	0.00618544
comp2268473_c1_seq1_m.65668	1.0849	0.000214765	0.00261519	0.00634749
comp2264838_c0_seq3_m.59436	-1.23844	0.000225085	0.00266678	0.00647272
comp2277416_c0_seq3_m.85174	0.975278	0.000236628	0.00268694	0.00652165
comp2276668_c0_seq1_m.83017	-0.923272	0.000239046	0.00268694	0.00652165
comp2276805_c0_seq8_m.83380	0.877632	0.00024572	0.00269291	0.00653615
comp2275391_c0_seq1_m.79711	-0.995237	0.000281434	0.00300909	0.00730357
comp2274137_c1_seq25_m.76929	-1.35615	0.000317579	0.00326407	0.00792244
comp2262731_c0_seq1_m.56213	0.876025	0.000325999	0.00326407	0.00792244
comp2268937_c0_seq1_m.66472	0.706524	0.00032762	0.00326407	0.00792244
comp2269459_c0_seq2_m.67456	0.954825	0.00034413	0.00335237	0.00813676
comp2270576_c0_seq1_m.69463	0.99689	0.00036908	0.00351727	0.00853699
comp2268869_c0_seq6_m.66344	1.10837	0.000390412	0.00356803	0.0086602
comp2278405_c0_seq22_m.88893	0.722806	0.000390686	0.00356803	0.0086602
comp2279748_c0_seq1_m.91174	-0.717538	0.000402842	0.00360396	0.00874741
comp2242407_c0_seq1_m.30845	1.19204	0.000411288	0.00360593	0.0087522
comp2269158_c0_seq1_m.66914	0.669048	0.000428181	0.00368044	0.00893304
gnl_Pdu_trscr_assembly_1_16296_m.13041	-0.851052	0.000455519	0.00379637	0.00921442
comp2277947_c0_seq1_m.86990	-0.748541	0.000458989	0.00379637	0.00921442
comp2274295_c0_seq2_m.77311	0.737861	0.000482117	0.00391382	0.0094995
comp2257070_c0_seq2_m.47513	0.66318	0.000518547	0.00413302	0.0100315
comp2269009_c0_seq1_m.66627	-0.755985	0.00055999	0.00428963	0.0104116
comp2225664_c0_seq1_m.20382	0.749565	0.000561036	0.00428963	0.0104116
comp2278630_c0_seq8_m.90809	-0.705595	0.000577096	0.00428963	0.0104116
comp2276528_c1_seq4_m.82615	0.713508	0.000589013	0.00428963	0.0104116
comp2275933_c0_seq1_m.81045	0.637782	0.000589746	0.00428963	0.0104116
comp2260394_c0_seq1_m.52394	-0.623232	0.000608841	0.00428963	0.0104116
comp1953077_c0_seq1_m.3483	-0.943671	0.000615135	0.00428963	0.0104116
comp2280482_c0_seq1_m.91228	-0.793037	0.000616478	0.00428963	0.0104116
comp2273417_c0_seq5_m.75297	-0.680647	0.000644327	0.00441335	0.0107119
comp2252059_c0_seq1_m.40786	0.810431	0.000659317	0.00444655	0.0107925
comp2264302_c0_seq2_m.58699	-0.74609	0.000678134	0.0044826	0.01088
comp2138952_c0_seq1_m.6867	0.807349	0.000685114	0.0044826	0.01088
comp2276577_c0_seq8_m.92288	0.731613	0.000709825	0.00457598	0.0111067
comp2278605_c1_seq8_m.90480	0.596642	0.00073591	0.00467539	0.011348
comp2272842_c0_seq2_m.74081	-1.07229	0.000776228	0.00486109	0.0117987
gi_613484551	0.710028	0.000804551	0.0049675	0.0120569
comp2270845_c1_seq1_m.69967	0.889109	0.000818449	0.00498312	0.0120949
comp2273900_c0_seq1_m.76336	-1.02597	0.000850457	0.00510707	0.0123957
comp2277945_c0_seq2_m.86985	0.922137	0.000879633	0.00521089	0.0126477
comp2278480_c1_seq1_m.89333	0.602606	0.000907982	0.00530711	0.0128812
comp2269345_c0_seq1_m.67253	0.622372	0.000967911	0.00558295	0.0135508
comp2279340_c0_seq1_m.91103	0.742728	0.00098858	0.00562812	0.0136604
comp2263921_c0_seq2_m.58101	1.00464	0.00101206	0.00567903	0.0137839
gnl_Pdu_trscr_assembly_1_7274_m.39240	0.708292	0.00102343	0.00567903	0.0137839
comp2262241_c0_seq1_m.55434	0.800454	0.00104302	0.0057154	0.0138722
comp2268340_c1_seq1_m.65478	0.620183	0.00106752	0.0057276	0.0139018
comp2278276_c0_seq16_m.88350	0.641071	0.00107138	0.0057276	0.0139018
comp2263787_c0_seq3_m.57874	0.844411	0.00113969	0.00582137	0.0141294
comp2267571_c0_seq4_m.64058	-0.937327	0.00114111	0.00582137	0.0141294
comp2257905_c0_seq1_m.48664	-0.768902	0.00114559	0.00582137	0.0141294
comp2275191_c0_seq1_m.79281	0.581331	0.00115521	0.00582137	0.0141294
comp2270228_c0_seq1_m.68797	0.578897	0.00115532	0.00582137	0.0141294
gnl_Pdu_trscr_assembly_1_7327_m.81715	-0.953189	0.00120545	0.00600495	0.014575
gnl_Pdu_trscr_assembly_1_200732_m.91055	-1.07274	0.00125255	0.00605674	0.0147007
comp2277933_c1_seq7_m.86946	0.566706	0.00127534	0.00605674	0.0147007
comp2273778_c1_seq23_m.76059	0.634682	0.00127752	0.00605674	0.0147007
comp2276825_c0_seq1_m.83424	0.59418	0.00128976	0.00605674	0.0147007
comp2141997_c0_seq1_m.7386	0.996165	0.00130145	0.00605674	0.0147007
comp2236614_c0_seq1_m.26450	0.567136	0.00130662	0.00605674	0.0147007
comp2277680_c0_seq25_m.86056	-0.892409	0.00131256	0.00605674	0.0147007
comp2272435_c0_seq2_m.73201	0.924168	0.00137456	0.00627675	0.0152347
comp2275191_c1_seq2_m.79282	0.557588	0.00144272	0.00652007	0.0158253
comp2277729_c0_seq10_m.86207	0.646665	0.00158743	0.00709531	0.0172215
comp2278077_c0_seq3_m.87468	0.820534	0.00160238	0.00709531	0.0172215
comp2261716_c0_seq2_m.54597	0.549642	0.00168933	0.00740556	0.0179745
comp2276377_c0_seq2_m.82218	-0.510768	0.00171637	0.00742506	0.0180219
comp2275674_c1_seq1_m.80370	-0.934534	0.00172766	0.00742506	0.0180219
comp2278509_c0_seq8_m.89637	0.567487	0.00180784	0.00769424	0.0186752
comp1953876_c0_seq1_m.3493	0.795338	0.00184071	0.0077588	0.0188319
comp2250550_c1_seq1_m.39064	0.746782	0.0019034	0.0079301	0.0192477
comp2275358_c0_seq1_m.79627	-0.553807	0.00191753	0.0079301	0.0192477
comp2270404_c0_seq3_m.69137	-0.863021	0.00196427	0.00804747	0.0195325
comp2272882_c0_seq14_m.74184	-0.825079	0.00198961	0.0080618	0.0195673
comp2273747_c0_seq4_m.75989	0.632209	0.00200455	0.0080618	0.0195673
comp2252847_c0_seq1_m.41763	0.584093	0.00202801	0.00806548	0.0195762
gnl_Pdu_trscr_assembly_1_1514_m.69841	0.594031	0.00205127	0.00806548	0.0195762
comp2276750_c0_seq1_m.83194	0.518477	0.00206277	0.00806548	0.0195762
comp2272547_c0_seq4_m.73421	-0.585503	0.00209297	0.00806548	0.0195762
comp2273141_c0_seq2_m.74737	0.545884	0.00210489	0.00806548	0.0195762
comp2272319_c0_seq24_m.72950	0.66813	0.00214637	0.00806548	0.0195762
comp2247098_c0_seq1_m.35275	1.24952	0.00214673	0.00806548	0.0195762
comp1876805_c0_seq1_m.2339	0.515325	0.00215265	0.00806548	0.0195762
comp2269987_c0_seq2_m.68354	0.575599	0.00218139	0.00809063	0.0196373
comp2232805_c0_seq1_m.23974	0.538215	0.00220319	0.00809063	0.0196373
comp2277142_c0_seq6_m.84365	0.870195	0.00221473	0.00809063	0.0196373
comp2263508_c0_seq1_m.57408	0.628666	0.00224938	0.00814928	0.0197797
comp2270385_c0_seq11_m.69105	1.15771	0.00230603	0.00828606	0.0201116
comp2269171_c0_seq3_m.66933	0.619793	0.00234759	0.00836679	0.0203076
comp2267341_c0_seq1_m.63653	-0.549176	0.00240437	0.008472	0.020563
comp1244797_c0_seq1_m.1278	0.593456	0.0024221	0.008472	0.020563
comp2263073_c0_seq1_m.56786	-0.567363	0.00243509	0.008472	0.020563
comp2261379_c0_seq1_m.54133	0.954048	0.00254133	0.00873534	0.0212021
gnl_Pdu_trscr_assembly_1_17807_m.62055	0.55305	0.00255063	0.00873534	0.0212021
comp2268906_c0_seq4_m.66401	0.538819	0.00258116	0.00877137	0.0212896
comp1785956_c0_seq1_m.2259	0.589351	0.00261363	0.00879837	0.0213551
comp2274358_c0_seq3_m.77437	0.493209	0.00262925	0.00879837	0.0213551
gnl_Pdu_trscr_assembly_1_3048_m.12984	1.19692	0.00268075	0.00890276	0.0216085
comp2272863_c1_seq5_m.74143	-0.626279	0.00277137	0.00901749	0.0218869
comp2273038_c0_seq3_m.74522	0.584136	0.00277154	0.00901749	0.0218869
comp2278238_c0_seq6_m.88188	0.604117	0.00277701	0.00901749	0.0218869
comp2278133_c0_seq3_m.87701	0.5691	0.00282082	0.00905085	0.0219679
comp2201786_c0_seq1_m.13247	0.957124	0.00283211	0.00905085	0.0219679
comp2265471_c0_seq5_m.60488	0.842697	0.00287348	0.00905085	0.0219679
comp2274106_c1_seq2_m.76871	0.929027	0.00288291	0.00905085	0.0219679
comp2276966_c0_seq13_m.83854	-0.50015	0.00289052	0.00905085	0.0219679
comp2271595_c0_seq2_m.71452	0.673549	0.00294613	0.00915958	0.0222318
comp2269593_c0_seq3_m.67692	0.494144	0.003016	0.00931075	0.0225987
comp2249227_c0_seq1_m.37479	-0.758145	0.00304458	0.00933328	0.0226534
comp2254641_c1_seq1_m.44200	-0.577819	0.00310284	0.0093471	0.022687
comp2257487_c0_seq1_m.48064	-0.629235	0.0031047	0.0093471	0.022687
comp2242933_c0_seq1_m.31351	-0.793059	0.00311306	0.0093471	0.022687
comp2276968_c0_seq3_m.83862	0.511821	0.00315382	0.00938027	0.0227675
comp1910314_c0_seq1_m.2848	-0.885718	0.0031669	0.00938027	0.0227675
comp2231610_c0_seq1_m.23229	0.497172	0.00349742	0.0102897	0.0249748
comp2277388_c0_seq8_m.85093	-0.55958	0.00362833	0.0106037	0.025737
comp2265768_c0_seq2_m.60943	-0.829081	0.00386626	0.0111547	0.0270743
comp2269814_c0_seq1_m.68069	0.504243	0.00387152	0.0111547	0.0270743
comp2265049_c0_seq3_m.59764	0.952215	0.0039038	0.0111547	0.0270743
gnl_Pdu_trscr_assembly_1_7964_m.49648	0.481081	0.00391866	0.0111547	0.0270743
comp2254426_c0_seq1_m.43954	-0.93176	0.00402996	0.0113975	0.0276637
gnl_Pdu_trscr_assembly_1_14638_m.60097	-0.684168	0.00406335	0.0114183	0.0277142
comp2252746_c0_seq1_m.41651	-0.675129	0.0041453	0.0115107	0.0279384
comp2259363_c0_seq16_m.50888	0.466378	0.00416471	0.0115107	0.0279384
comp2224614_c0_seq1_m.19939	0.50176	0.00417501	0.0115107	0.0279384
comp2278474_c0_seq1_m.89294	-0.747953	0.00423246	0.0115692	0.0280803
comp2270876_c0_seq2_m.70018	-0.846764	0.00424899	0.0115692	0.0280803
comp2274238_c3_seq9_m.77182	0.486185	0.00435395	0.0117818	0.0285963
comp2281676_c0_seq1_m.91255	0.949145	0.00447183	0.0120265	0.0291904
comp2271637_c0_seq1_m.71562	0.59873	0.00450687	0.0120468	0.0292397
comp2275406_c1_seq7_m.79751	0.503276	0.00461656	0.0122358	0.0296982
comp2272118_c0_seq11_m.72524	0.590818	0.00463337	0.0122358	0.0296982
comp2277132_c1_seq1_m.84335	0.689648	0.00475188	0.0124736	0.0302754
comp2273216_c0_seq3_m.74900	0.472693	0.00479968	0.0125082	0.0303594
comp2265326_c0_seq3_m.60204	0.536864	0.00482213	0.0125082	0.0303594
comp2270220_c0_seq1_m.68776	0.77074	0.00502442	0.0129563	0.031447
comp2274999_c0_seq4_m.78837	0.582795	0.0051945	0.0132495	0.0321587
comp2274301_c0_seq6_m.77327	0.48246	0.00519859	0.0132495	0.0321587
comp2273142_c0_seq1_m.74744	-0.450948	0.00528216	0.0133847	0.0324868
comp2264621_c0_seq1_m.59138	-0.449861	0.00537908	0.0135519	0.0328928
comp2238888_c1_seq2_m.28027	0.440888	0.00550257	0.0136539	0.0331402
comp2257633_c0_seq1_m.48279	-0.490888	0.00552064	0.0136539	0.0331402
comp2268115_c0_seq2_m.65034	-0.553271	0.00553378	0.0136539	0.0331402
comp2254675_c0_seq1_m.44244	-0.4695	0.00556386	0.0136539	0.0331402
comp2277496_c1_seq4_m.85444	-0.483776	0.00557528	0.0136539	0.0331402
comp2279567_c0_seq1_m.91146	0.72192	0.00563372	0.0137203	0.0333015
comp2270650_c0_seq1_m.69588	-0.52057	0.00571642	0.0138448	0.0336037
comp2260103_c0_seq1_m.51994	-0.653187	0.00580288	0.013977	0.0339245
comp2261018_c0_seq2_m.53614	-0.571022	0.00583819	0.0139852	0.0339444
comp2138394_c0_seq1_m.6761	0.529689	0.00589293	0.0140396	0.0340765
comp2232909_c0_seq1_m.24034	0.656949	0.0060423	0.0142573	0.034605
comp2272491_c1_seq4_m.73302	-0.49494	0.00604936	0.0142573	0.034605
comp2260960_c0_seq2_m.53456	0.721182	0.00629079	0.0147471	0.0357936
comp2267483_c0_seq3_m.63903	-0.706356	0.00666757	0.0154967	0.0376131
comp2279450_c0_seq1_m.91124	0.57271	0.00668128	0.0154967	0.0376131
gnl_Pdu_trscr_assembly_1_9334_m.28552	0.424052	0.0067441	0.0155601	0.037767
comp2272782_c0_seq2_m.73955	-0.679319	0.00687697	0.0157836	0.0383094
comp2273190_c0_seq1_m.74828	-0.487732	0.00711084	0.0162246	0.0393799
comp2275662_c1_seq10_m.80344	0.500666	0.00714316	0.0162246	0.0393799
comp2273765_c1_seq6_m.76032	0.796771	0.00721644	0.0162403	0.0394179
comp2278378_c0_seq4_m.88778	0.505733	0.00722912	0.0162403	0.0394179
comp2204754_c0_seq1_m.13720	0.686111	0.0072612	0.0162403	0.0394179
comp1916779_c0_seq1_m.2944	-0.519899	0.00763633	0.0169926	0.0412439
comp2275523_c0_seq29_m.80039	0.67634	0.00787519	0.0174357	0.0423192
comp2275833_c0_seq1_m.80771	-0.407343	0.00810604	0.0178566	0.0433408
comp2266931_c0_seq5_m.62893	0.684739	0.00823058	0.0180358	0.0437759
comp2246502_c0_seq1_m.34680	-0.706522	0.00826969	0.0180358	0.0437759
comp2248791_c1_seq1_m.37027	0.669385	0.00831544	0.0180458	0.0438002
comp2262197_c0_seq1_m.55346	0.568896	0.00851735	0.0183929	0.0446427
comp2269201_c0_seq1_m.67004	-0.541836	0.00882739	0.018969	0.0460409
comp2269850_c0_seq1_m.68122	0.626606	0.00902193	0.0191791	0.0465509
comp2247821_c0_seq5_m.35979	0.984144	0.00904587	0.0191791	0.0465509
comp2266701_c0_seq3_m.62512	1.0494	0.00905643	0.0191791	0.0465509
gnl_Pdu_trscr_assembly_1_2589_m.58494	-0.420142	0.00933019	0.0196639	0.0477275
comp2277759_c0_seq3_m.86312	0.469703	0.00949334	0.019912	0.0483297
comp2271113_c0_seq5_m.70438	0.705273	0.00962015	0.0200819	0.0487421
comp2274783_c0_seq9_m.78326	0.647921	0.00986634	0.0204982	0.0497525
comp2265029_c1_seq4_m.59734	0.543209	0.0101805	0.0210511	0.0510945
comp2201655_c0_seq1_m.13229	0.495841	0.0103145	0.0212282	0.0515243
comp2274888_c0_seq2_m.78557	0.442004	0.0103996	0.0213032	0.0517064
comp2263612_c1_seq1_m.57550	-0.654653	0.0105591	0.0215083	0.0522043
comp2265328_c0_seq2_m.60206	-1.07412	0.010715	0.0215083	0.0522043
comp2266441_c0_seq1_m.62027	0.598196	0.0107494	0.0215083	0.0522043
comp2262887_c0_seq1_m.56477	0.422504	0.010758	0.0215083	0.0522043
comp2265255_c2_seq1_m.60100	0.413476	0.0107733	0.0215083	0.0522043
comp2263771_c0_seq2_m.57851	0.552636	0.0107941	0.0215083	0.0522043
comp2280536_c0_seq1_m.91231	-0.702523	0.0111394	0.022096	0.0536306
comp2271909_c0_seq2_m.72111	0.400142	0.0112089	0.0221337	0.0537221
comp2232290_c0_seq2_m.23637	0.735462	0.0113392	0.0221923	0.0538645
comp2243632_c0_seq1_m.31907	-0.404475	0.0113399	0.0221923	0.0538645
comp2258609_c0_seq1_m.49647	0.754691	0.0114257	0.0221942	0.053869
comp2237053_c0_seq1_m.26700	0.468588	0.0114421	0.0221942	0.053869
comp2249005_c0_seq2_m.37257	0.481258	0.0115341	0.0222228	0.0539384
comp2271567_c0_seq1_m.71391	0.452001	0.0115582	0.0222228	0.0539384
comp2265464_c0_seq1_m.60472	-0.651094	0.0116156	0.0222356	0.0539696
comp2280694_c0_seq1_m.91236	0.862674	0.0117586	0.0224114	0.0543963
comp2277722_c0_seq17_m.86189	-0.475359	0.0119206	0.0226218	0.0549068
comp2277982_c0_seq2_m.87136	0.567673	0.012004	0.0226819	0.0550527
comp2267011_c0_seq2_m.63019	0.451579	0.0123641	0.023262	0.0564607
comp2276440_c0_seq2_m.82383	0.437733	0.0125686	0.0235354	0.0571243
comp2278485_c0_seq1_m.89374	0.686103	0.0126254	0.0235354	0.0571243
gnl_Pdu_trscr_assembly_1_17049_m.35386	-0.866716	0.0126704	0.0235354	0.0571243
comp2244716_c0_seq1_m.32883	0.504531	0.0128352	0.0237065	0.0575397
comp2266439_c0_seq1_m.62025	0.417211	0.0128707	0.0237065	0.0575397
comp2261355_c0_seq1_m.54106	-0.643443	0.0130891	0.0240079	0.0582712
comp2239022_c0_seq1_m.28102	-0.480359	0.0133856	0.0244494	0.0593427
comp2275759_c0_seq17_m.80560	-0.358156	0.0135633	0.0246712	0.0598811
comp2226643_c0_seq1_m.20830	-0.511326	0.0136561	0.0247374	0.0600418
comp2254456_c0_seq2_m.43993	0.515678	0.0140623	0.0253684	0.0615733
comp2139380_c0_seq1_m.6935	0.425071	0.014584	0.0262016	0.0635957
comp2271413_c1_seq5_m.70995	-0.573664	0.0146949	0.0262932	0.063818
comp2274262_c0_seq1_m.77231	-0.764911	0.0149934	0.0267183	0.0648497
comp2266171_c0_seq1_m.61557	0.456377	0.0150937	0.0267881	0.0650192
comp2273599_c0_seq7_m.75677	0.47025	0.0155912	0.0275594	0.0668912
comp2278470_c0_seq2_m.89275	0.391211	0.0160722	0.0282208	0.0684966
gnl_Pdu_trscr_assembly_1_3867_m.65412	0.655902	0.0160941	0.0282208	0.0684966
comp2276804_c0_seq1_m.83376	-0.575877	0.0162761	0.0283979	0.0689265
comp2263346_c1_seq31_m.57192	-0.428754	0.0163247	0.0283979	0.0689265
comp2265386_c0_seq2_m.60299	0.48136	0.0165224	0.0286283	0.0694855
comp2248291_c0_seq1_m.36455	-0.3502	0.0168162	0.0290026	0.0703942
comp2263822_c0_seq1_m.57945	0.343628	0.0168843	0.0290026	0.0703942
comp2269374_c0_seq3_m.67298	0.424986	0.0169951	0.0290026	0.0703942
gnl_Pdu_trscr_assembly_1_11633_m.54013	-0.679721	0.0170031	0.0290026	0.0703942
comp2262843_c0_seq2_m.56395	0.45824	0.0173067	0.0293349	0.0712006
comp2269326_c0_seq2_m.67220	-0.408096	0.0173317	0.0293349	0.0712006
comp2265462_c0_seq5_m.60462	-0.45499	0.0175521	0.0295937	0.0718288
comp2273647_c0_seq2_m.75785	0.362008	0.0178644	0.0299226	0.0726271
comp2258601_c0_seq1_m.49627	0.384627	0.0178837	0.0299226	0.0726271
gnl_Pdu_trscr_assembly_1_14069_m.67140	-0.334666	0.0179601	0.0299361	0.0726598
comp2277605_c1_seq7_m.85828	0.45798	0.0182352	0.0302795	0.0734933
comp1194343_c0_seq1_m.800	0.536622	0.0186	0.0307687	0.0746809
comp2276871_c0_seq8_m.83582	0.495403	0.0187864	0.0308748	0.0749383
comp2267691_c0_seq1_m.64257	-0.343037	0.018805	0.0308748	0.0749383
comp2262927_c0_seq2_m.56544	0.479546	0.0189375	0.0309763	0.0751845
comp2250982_c0_seq1_m.39507	0.876733	0.0196257	0.0319496	0.0775471
comp2287273_c0_seq1_contamination_m.91384	0.578886	0.0196783	0.0319496	0.0775471
comp2270279_c0_seq7_m.68904	-0.523546	0.0201441	0.0325557	0.0790181
comp2205419_c0_seq2_m.13843	-0.47454	0.0202001	0.0325557	0.0790181
comp2258619_c0_seq2_m.49656	0.719417	0.0203985	0.0326972	0.0793615
comp2251386_c0_seq2_m.40044	-0.400871	0.0204371	0.0326972	0.0793615
comp2277908_c1_seq11_m.86865	0.678934	0.0207859	0.0331343	0.0804224
comp2256041_c0_seq1_m.46046	0.508809	0.0211088	0.0335272	0.081376
comp2279445_c0_seq1_m.91120	0.551325	0.0214418	0.0339208	0.0823314
comp2278623_c0_seq6_m.90693	0.437334	0.0215151	0.0339208	0.0823314
comp2268798_c0_seq2_m.66233	0.428376	0.0215888	0.0339208	0.0823314
comp2266801_c0_seq2_m.62707	-0.330401	0.022158	0.0346908	0.0842004
gnl_Pdu_trscr_assembly_1_19681_m.92605	0.535916	0.0222907	0.0347744	0.0844033
comp2265703_c0_seq1_m.60844	-0.512475	0.0225028	0.0349693	0.0848763
comp2245721_c0_seq1_m.33844	-0.55925	0.0226253	0.0349693	0.0848763
comp2274643_c0_seq2_m.78058	0.338671	0.022655	0.0349693	0.0848763
comp2278054_c0_seq40_m.87392	0.34316	0.0232966	0.0358335	0.0869739
comp2278587_c0_seq14_m.90327	0.32819	0.0234357	0.0359215	0.0871875
comp2279235_c0_seq1_m.91078	-0.31479	0.0235305	0.035941	0.0872349
comp2275857_c0_seq4_m.80829	0.328837	0.0240074	0.0365276	0.0886584
comp2254418_c0_seq1_m.43945	-0.382759	0.0241592	0.0365276	0.0886584
comp2269698_c0_seq1_m.67864	0.354089	0.0241644	0.0365276	0.0886584
comp2266882_c0_seq1_m.62832	0.314402	0.0243694	0.0367108	0.0891031
comp2245053_c0_seq1_m.33185	0.710821	0.024508	0.0367932	0.0893033
comp1838578_c0_seq1_m.2293	0.754292	0.0246339	0.0367954	0.0893084
comp2271675_c0_seq2_m.71655	0.482656	0.0246773	0.0367954	0.0893084
comp2265494_c0_seq1_m.60519	0.496931	0.0249222	0.0368752	0.0895023
comp2245511_c0_seq1_m.33658	-0.560541	0.024936	0.0368752	0.0895023
comp2258806_c0_seq1_m.49958	0.412664	0.0250025	0.0368752	0.0895023
comp2241424_c0_seq3_m.29932	0.530744	0.0250955	0.0368752	0.0895023
comp2261876_c0_seq1_m.54865	0.650058	0.0252069	0.0368752	0.0895023
comp2276314_c0_seq1_m.82075	0.524825	0.0252673	0.0368752	0.0895023
comp2266680_c0_seq1_m.62479	-0.506135	0.0253197	0.0368752	0.0895023
comp2257674_c0_seq1_m.48339	0.501558	0.0254733	0.0369009	0.0895647
comp2271916_c0_seq1_m.72122	0.346062	0.0255057	0.0369009	0.0895647
comp2252506_c0_seq1_m.41372	0.941806	0.025593	0.0369054	0.0895756
comp2232641_c0_seq7_m.23875	-0.675374	0.026343	0.0378623	0.0918982
comp2272087_c2_seq11_m.72459	0.543241	0.0264664	0.0379154	0.092027
comp2263896_c0_seq3_m.58065	-0.431535	0.0270298	0.0385963	0.0936797
comp1896477_c0_seq1_m.2604	-0.482278	0.027446	0.0390635	0.0948136
comp2278471_c0_seq8_m.89279	0.29851	0.0281944	0.0399988	0.0970837
comp2259230_c0_seq1_m.50704	-0.585637	0.0287906	0.0407128	0.0988168
comp2277815_c0_seq5_m.86532	0.401172	0.0290242	0.0409112	0.0992984

## Sheet: IM_FRFM vs PM_FRFM_Male
	logFC	p.mod	q.mod	adjusted.pvalue
comp2272437_c1_seq1_m.73204	-2.26139	5.12e-06	0.0025055	0.00465127
gnl_Pdu_trscr_assembly_1_200732_m.91056	-1.59662	1.16e-05	0.0025055	0.00465127
comp2274909_c0_seq7_m.78613	1.57404	1.31e-05	0.0025055	0.00465127
comp2271737_c1_seq2_m.71770	-1.92805	1.86e-05	0.00267016	0.00495693
comp2272691_c0_seq4_m.73750	1.16311	2.35e-05	0.00269526	0.00500353
comp2275893_c0_seq1_m.80933	-1.45977	3.95e-05	0.00377116	0.00700084
comp2280591_c0_seq1_m.91233	1.03615	5.26e-05	0.00431066	0.00800239
comp2257070_c0_seq2_m.47512	1.09953	9.71e-05	0.00644245	0.0119599
comp2269185_c0_seq2_m.66963	-1.20779	0.000124189	0.00644245	0.0119599
gnl_Pdu_trscr_assembly_1_15590_m.29311	1.48892	0.000125769	0.00644245	0.0119599
comp2274909_c0_seq7_m.78615	1.41125	0.00013112	0.00644245	0.0119599
comp2278010_c1_seq9_m.87231	-0.891165	0.000134886	0.00644245	0.0119599
comp2208474_c0_seq1_m.14351	-1.20708	0.000168218	0.00741642	0.013768
comp2237468_c0_seq1_m.27022	-1.78552	0.000184153	0.00753906	0.0139957
comp2232909_c0_seq1_m.24034	1.72532	0.000199547	0.00762464	0.0141545
comp2189372_c0_seq1_m.11219	-1.29987	0.000248707	0.00890911	0.016539
comp2254346_c0_seq1_m.43876	1.02043	0.000266051	0.00896979	0.0166517
comp2264888_c0_seq4_m.59493	1.0934	0.000283787	0.0090362	0.016775
comp2268473_c1_seq1_m.65668	1.00512	0.000300089	0.00905237	0.016805
comp2273926_c0_seq5_m.76421	0.969101	0.000388876	0.0111441	0.0206882
comp2275391_c0_seq1_m.79711	-0.975923	0.000444324	0.0121268	0.0225124
comp2271419_c1_seq1_m.71009	0.827443	0.000501988	0.0129706	0.0240788
gnl_Pdu_trscr_assembly_1_12794_m.61443	0.749652	0.000520501	0.0129706	0.0240788
comp2263787_c0_seq3_m.57874	0.869148	0.000579578	0.013355	0.0247925
comp2274137_c1_seq25_m.76929	-1.23245	0.00058253	0.013355	0.0247925
comp2257585_c0_seq1_m.48216	0.779111	0.000718914	0.0158478	0.0294202
comp2223962_c0_seq7_m.19686	-0.922982	0.000783048	0.0164702	0.0305755
comp2222959_c0_seq1_m.19328	-0.751844	0.000809513	0.0164702	0.0305755
comp2247098_c0_seq1_m.35275	1.14719	0.000833356	0.0164702	0.0305755
comp2276668_c0_seq1_m.83017	-0.75803	0.000868891	0.0166001	0.0308167
comp2277374_c0_seq2_m.85051	0.787881	0.000973049	0.0179903	0.0333975
gnl_Pdu_trscr_assembly_1_7327_m.81715	-0.954684	0.00113685	0.020362	0.0378004
comp1196959_c0_seq2_m.1014	0.736209	0.00126282	0.0219328	0.0407165
comp2270845_c1_seq1_m.69967	0.833592	0.00147456	0.0248571	0.0461452
comp2245014_c0_seq2_m.33157	-0.951867	0.00157337	0.025375	0.0471066
comp2267571_c0_seq4_m.64058	-0.899715	0.00159383	0.025375	0.0471066
gnl_Pdu_trscr_assembly_1_3048_m.12984	0.938655	0.00167277	0.0259119	0.0481034
gnl_Pdu_trscr_assembly_1_200732_m.91055	-1.00696	0.00181938	0.0274414	0.0509427
comp1194290_c0_seq1_m.781	-1.48278	0.00194332	0.0285562	0.0530122
gnl_Pdu_trscr_assembly_1_7274_m.39240	0.664739	0.00199294	0.0285562	0.0530122
comp2279748_c0_seq1_m.91174	-0.613752	0.00205439	0.0287187	0.0533139
comp2241424_c0_seq3_m.29932	0.771381	0.00211522	0.028865	0.0535856
comp2275853_c0_seq1_m.80817	0.625311	0.00224393	0.0295216	0.0548044
comp2262465_c0_seq5_m.55795	0.920517	0.00228359	0.0295216	0.0548044
comp2201786_c0_seq1_m.13247	0.682243	0.00231786	0.0295216	0.0548044
comp2271594_c0_seq8_m.71451	-0.653229	0.00254311	0.0314376	0.0583614
comp2252746_c0_seq1_m.41651	-0.715259	0.002578	0.0314376	0.0583614
comp2242407_c0_seq1_m.30845	0.815342	0.00269426	0.0317554	0.0589513
comp2242933_c0_seq1_m.31351	-0.870613	0.00272984	0.0317554	0.0589513
comp2276377_c0_seq2_m.82218	-0.563417	0.00282482	0.0317554	0.0589513
comp2268978_c0_seq1_m.66540	0.605731	0.00284664	0.0317554	0.0589513
comp2274238_c3_seq9_m.77182	0.593477	0.00288108	0.0317554	0.0589513
comp2275674_c1_seq1_m.80370	-0.790091	0.00299947	0.0324365	0.0602157
comp2264838_c0_seq3_m.59436	-1.02181	0.00334673	0.0351478	0.065249
comp2269321_c1_seq1_m.67212	-0.813772	0.00337284	0.0351478	0.065249
comp2273765_c1_seq6_m.76032	0.693443	0.00382593	0.0391575	0.0726928
comp2278405_c0_seq22_m.88893	0.584054	0.00391506	0.0393667	0.0730812
comp2268937_c0_seq1_m.66472	0.619837	0.00400037	0.039531	0.0733861
comp2270385_c0_seq11_m.69105	1.13434	0.00431362	0.0416136	0.0772523
comp2273900_c0_seq1_m.76336	-0.741799	0.00438017	0.0416136	0.0772523
comp2268869_c0_seq6_m.66344	0.76664	0.0045379	0.0416136	0.0772523
comp2275714_c2_seq1_m.80469	-0.816066	0.00453885	0.0416136	0.0772523
comp2232805_c0_seq1_m.23974	0.581719	0.00457415	0.0416136	0.0772523
comp2263921_c0_seq2_m.58101	0.805123	0.00481728	0.0428184	0.0794888
comp2277729_c0_seq10_m.86207	0.582198	0.00498954	0.0428184	0.0794888
comp2254641_c1_seq1_m.44200	-0.558468	0.00500748	0.0428184	0.0794888
comp2278276_c0_seq16_m.88350	0.56548	0.00505387	0.0428184	0.0794888
comp2278509_c0_seq8_m.89637	0.54617	0.00508011	0.0428184	0.0794888
comp2278238_c0_seq6_m.88188	0.587827	0.00520167	0.0432075	0.0802113
comp2265049_c0_seq3_m.59764	0.902485	0.00543118	0.0435974	0.080935
comp2278480_c0_seq4_m.89330	0.550196	0.00551181	0.0435974	0.080935
comp2274295_c0_seq2_m.77311	0.58968	0.00552528	0.0435974	0.080935
comp2280694_c0_seq1_m.91236	0.803952	0.00556913	0.0435974	0.080935
comp2278480_c1_seq1_m.89333	0.509945	0.00563948	0.0435974	0.080935
comp2272435_c0_seq2_m.73201	0.788724	0.005705	0.0435974	0.080935
comp2257070_c0_seq2_m.47513	0.769134	0.00615783	0.0458709	0.0851556
comp2277416_c0_seq3_m.85174	0.651633	0.00617739	0.0458709	0.0851556
comp2250550_c1_seq1_m.39064	0.768604	0.00624261	0.0458709	0.0851556
comp2273778_c1_seq23_m.76059	0.551909	0.00647367	0.0469666	0.0871897
comp2261379_c0_seq1_m.54133	0.841087	0.00661549	0.0471681	0.0875637
comp2268906_c0_seq4_m.66401	0.509807	0.00666604	0.0471681	0.0875637
comp2257905_c0_seq1_m.48664	-0.634612	0.00686575	0.0479888	0.0890873
comp2280536_c0_seq1_m.91231	-0.824112	0.00720387	0.049169	0.0912782
comp2225664_c0_seq1_m.20382	0.559726	0.00720618	0.049169	0.0912782
comp2138952_c0_seq1_m.6867	0.605889	0.00730722	0.0492719	0.0914692
comp2273038_c0_seq3_m.74522	0.526555	0.00742746	0.0495003	0.0918932
comp2263073_c0_seq1_m.56786	-0.524599	0.00752025	0.0495426	0.0919718
comp2275933_c0_seq1_m.81045	0.503077	0.00769585	0.0497276	0.0923152
comp2265656_c0_seq3_m.60780	0.517398	0.00777339	0.0497276	0.0923152
comp1910314_c0_seq1_m.2848	-0.813738	0.00790856	0.0497276	0.0923152
comp2278605_c1_seq8_m.90480	0.470296	0.00794653	0.0497276	0.0923152
comp2272882_c0_seq14_m.74184	-0.629361	0.0080908	0.0497276	0.0923152
comp2278630_c0_seq8_m.90809	-0.513177	0.00811625	0.0497276	0.0923152
comp2270228_c0_seq1_m.68797	0.494494	0.00815567	0.0497276	0.0923152
comp2270876_c0_seq2_m.70018	-0.718837	0.00873376	0.0526918	0.0978181

## Sheet: PM_NM_Female vs PM_NM_Male
	logFC	p.mod	q.mod	adjusted.pvalue

## Sheet: M_NM_Female vs M_NM_Male
	logFC	p.mod	q.mod	adjusted.pvalue
comp2263011_c0_seq1_m.56689	0.63425	9.64e-06	0.00518604	0.00518604
gnl_Pdu_trscr_assembly_1_91632_m.21453	0.684268	9.75e-06	0.00518604	0.00518604
comp2232805_c0_seq1_m.23974	-0.674089	1.68e-05	0.00596206	0.00596206
comp2232909_c0_seq1_m.24034	-1.26832	3.51e-05	0.00932372	0.00932372
comp2254675_c0_seq1_m.44244	0.4404	0.00032714	0.0696153	0.0696153
comp2274537_c0_seq28_m.77857	-0.598569	0.000461816	0.0818954	0.0818954

[truncated: 4 more sheets: PM_FRFM_Female vs PM_FRFM_Male, IM_FRFM vs IM_NM, PM_FRFM_Female vs PM_NM_Female, PM_FRFM_Male vs PM_NM_Male]
