# Supplementary material for: Combined transcriptome and proteome profiling reveals specific molecular brain signatures for sex, maturation and circalunar clock phase
Source: eLife. 2019 Feb 15;8:e41556. doi: 10.7554/eLife.41556 (PMC6377233; doi:10.7554/eLife.41556)
Supplement: Figure 5—source data 8. — This file contains the ROTS-LIMMA rank sums for predicted DEPs for all 14 comparision made plus the all maturation rank sum predictions. Each comparison is contained within a separate tab. [file elife-41556-fig5-data8.xlsx]

## Sheet: IM_NM vs PM_NM_Female
	limma.logFC	rots.logFC	limma.pvalue	rots.pvalue	limma.adj.pvalue	rots.adj.pvalue	limma.rank	rots.rank	rank.sum
comp2189372_c0_seq1_m.11219	-0.772704	-0.772839	9.51e-06	0.000270677	0.00373367	0	1	1	2
comp2237468_c0_seq1_m.27022	-1.52983	-1.55238	2.75e-05	9.02256e-05	0.00373367	0	2	2	4
comp2257905_c0_seq1_m.48664	-0.874325	-0.878192	2.41e-05	0.000541353	0.00373367	0	3	3	6
comp2267732_c0_seq2_m.64331	-0.710721	-0.71106	2.97e-05	0.000992481	0.00373367	0	4	4	8
comp2270279_c0_seq7_m.68904	-0.602098	-0.602302	3.51e-05	0.00135338	0.00373367	0	5	5	10
comp2273926_c0_seq5_m.76421	1.31806	1.32591	3.31e-05	0.000180451	0.00373367	0	6	6	12
comp2274106_c1_seq2_m.76871	0.823949	0.828748	2.91e-05	0.00081203	0.00373367	0	7	7	14
gnl_Pdu_trscr_assembly_1_16296_m.13041	-0.861504	-0.863811	1.85e-05	0.000360902	0.00373367	0	8	8	16
gnl_Pdu_trscr_assembly_1_7327_m.81715	-0.761849	-0.761912	1.79e-05	0.000721805	0.00373367	0	9	9	18
gnl_Pdu_trscr_assembly_1_998_m.15062	-0.784873	-0.783578	1.45e-05	0.000451128	0.00373367	0	10	10	20
comp2269321_c1_seq1_m.67212	-0.790409	-0.789511	4.85e-05	0.00108271	0.00469375	0	11	11	22
comp2268115_c0_seq2_m.65034	-0.678092	-0.680709	5.96e-05	0.00153383	0.00528753	0	12	12	24
comp2256041_c0_seq1_m.46046	0.624711	0.62142	7.63e-05	0.00216541	0.00558117	0	13	13	26
comp2275841_c0_seq1_m.80783	-0.761687	-0.76456	7.87e-05	0.00144361	0.00558117	0	14	14	28
gnl_Pdu_trscr_assembly_1_14638_m.60097	-0.841996	-0.846809	7.1e-05	0.00126316	0.00558117	0	15	15	30
comp2269987_c0_seq2_m.68354	0.759213	0.765614	9.98e-05	0.00162406	0.00663755	0	16	16	32
comp2208474_c0_seq1_m.14351	-0.77992	-0.770375	0.000129066	0.00171429	0.00766642	0	17	17	34
comp2229729_c0_seq1_m.22264	0.97737	0.99382	0.0001369	0.00117293	0.00766642	0	18	18	36
comp2257939_c0_seq1_m.48703	-0.782762	-0.778067	0.000131607	0.00180451	0.00766642	0	19	19	38
comp1326513_c0_seq1_m.1923	-0.683856	-0.683397	0.000212893	0.00261654	0.00783804	0	20	20	40
comp2245014_c0_seq2_m.33157	-0.809169	-0.805487	0.000202159	0.00198496	0.00783804	0	21	21	42
comp2247988_c0_seq1_m.36173	-0.67779	-0.677263	0.000169746	0.00252632	0.00783804	0	22	22	44
comp2253217_c0_seq2_m.42336	-0.618029	-0.61439	0.000213631	0.00315789	0.00783804	0	23	23	46
comp2253856_c0_seq1_m.43254	-0.627286	-0.627201	0.000176928	0.00288722	0.00783804	0	24	24	48
comp2261716_c0_seq2_m.54597	0.522444	0.524463	0.000184772	0.00442105	0.00783804	0	25	25	50
comp2263115_c0_seq2_m.56831	0.778201	0.789003	0.000173969	0.00207519	0.00783804	0	26	26	52
comp2263921_c0_seq2_m.58101	0.562284	0.56287	0.000165888	0.00342857	0.00783804	0	27	27	54
comp2264838_c0_seq3_m.59436	-1.40895	-1.41163	0.000209587	0.000631579	0.00783804	0	28	28	56
comp2270404_c0_seq3_m.69137	-0.775466	-0.781969	0.000209859	0.00234586	0.00783804	0	29	29	58
comp1958245_c0_seq1_m.3536	-0.481908	-0.481185	0.000236053	0.00541353	0.00784875	0	30	30	60
comp2267172_c0_seq1_m.63318	0.641899	0.640926	0.000232403	0.00306767	0.00784875	0	31	31	62
comp2268340_c1_seq1_m.65478	0.619635	0.613826	0.000235629	0.00324812	0.00784875	0	32	32	64
comp2274278_c0_seq6_m.77267	-0.614024	-0.617688	0.000249441	0.00378947	0.00804258	0	33	33	66
comp2347711_c0_seq1_contamination_m.91628	-0.758442	-0.769431	0.000257969	0.00243609	0.00807291	0	34	34	68
comp2278077_c0_seq3_m.87468	0.637078	0.629524	0.000270441	0.00333835	0.00812161	0	35	35	70
comp2287273_c0_seq1_contamination_m.91384	0.430153	0.429398	0.000276016	0.00640602	0.00812161	0	36	36	72
gnl_Pdu_trscr_assembly_1_12794_m.61443	0.924094	0.92225	0.000282424	0.00189474	0.00812161	0	37	37	74
comp2277947_c0_seq1_m.86990	-0.527614	-0.523888	0.000297168	0.00532331	0.00832071	0	38	38	76
comp1197507_c0_seq1_m.1032	-0.53133	-0.526696	0.000362676	0.00586466	0.00836475	0	39	39	78
comp1244797_c0_seq1_m.1278	0.434796	0.43637	0.000419995	0.00821053	0.00836475	0	40	40	80
comp1910314_c0_seq1_m.2848	-0.671494	-0.671671	0.00044574	0.00406015	0.00836475	0	41	41	82
comp1953876_c0_seq1_m.3493	0.687215	0.679434	0.000391155	0.00369925	0.00836475	0	42	42	84
comp2203251_c0_seq1_m.13504	0.475975	0.474889	0.000404698	0.00730827	0.00836475	0	43	43	86
comp2224448_c0_seq1_m.19874	-0.497648	-0.493849	0.000443322	0.00712782	0.00836475	0	44	44	88
comp2226643_c0_seq1_m.20830	-0.558649	-0.557403	0.000394091	0.00550376	0.00836475	0	45	45	90
comp2252285_c0_seq2_m.41107	-0.459586	-0.458441	0.000448112	0.00803008	0.00836475	0	46	46	92
comp2252847_c0_seq1_m.41763	0.464784	0.462154	0.000407652	0.00766917	0.00836475	0	47	47	94
comp2254641_c1_seq1_m.44200	-0.501117	-0.500821	0.000411971	0.00676692	0.00836475	0	48	48	96
comp2257395_c0_seq4_m.47951	1.38855	1.44216	0.000339815	0.000902256	0.00836475	0	49	49	98
comp2257585_c0_seq1_m.48216	0.729961	0.73009	0.000333891	0.00279699	0.00836475	0	50	50	100
comp2259221_c0_seq1_m.50687	0.467024	0.465678	0.000429119	0.0077594	0.00836475	0	51	51	102
comp2266692_c0_seq1_m.62504	0.651444	0.64228	0.000405073	0.0042406	0.00836475	0	52	52	104
comp2266841_c0_seq1_m.62766	0.689536	0.677871	0.000439765	0.0038797	0.00836475	0	53	53	106
comp2267571_c0_seq4_m.64058	-0.67788	-0.68754	0.00036247	0.00360902	0.00836475	0	54	54	108
comp2270876_c0_seq2_m.70018	-0.532882	-0.535775	0.000359583	0.00577444	0.00836475	0	55	55	110
comp2276035_c1_seq16_m.81307	-0.554723	-0.555699	0.000391726	0.00559398	0.00836475	0	56	56	112
comp2277416_c0_seq3_m.85174	0.628421	0.626203	0.000344138	0.00415038	0.00836475	0	57	57	114
comp2141229_c0_seq1_m.7283	-0.539494	-0.543419	0.000458203	0.00631579	0.00838076	0	58	58	116
comp2276151_c0_seq3_m.81648	0.508734	0.509176	0.000464723	0.00703759	0.00838076	0	59	59	118
comp2223962_c0_seq7_m.19686	-0.667726	-0.671286	0.000475963	0.00433083	0.00844041	0	60	60	120
comp2269185_c0_seq2_m.66963	-0.526108	-0.525933	0.000505002	0.00694737	0.00880856	0	61	61	122
comp2269158_c0_seq1_m.66914	0.422907	0.421748	0.000514183	0.00884211	0.00882404	0	62	62	124
comp2279567_c0_seq1_m.91146	0.660988	0.65908	0.000530749	0.0046015	0.00896377	0	63	63	126
comp2225664_c0_seq1_m.20382	0.444452	0.442507	0.00053985	0.00866165	0.00897501	0	64	64	128
comp2269009_c0_seq1_m.66627	-0.560295	-0.566074	0.000593149	0.00658647	0.0097094	0	65	65	130
comp2143334_c0_seq2_m.7649	0.61405	0.613897	0.000616437	0.00568421	0.00993771	0	66	66	132
comp2277908_c1_seq11_m.86865	0.449376	0.44598	0.000656055	0.00929323	0.0104185	0	67	67	134
comp2248821_c1_seq2_m.37050	-0.406737	-0.407693	0.000707317	0.010563	0.010907	0	68	68	136
comp2271737_c1_seq2_m.71770	-0.696699	-0.681161	0.000700243	0.00487218	0.010907	0	69	69	138
comp2258609_c0_seq1_m.49647	0.433935	0.43258	0.000753093	0.0102923	0.0114271	0	70	70	140
comp2260394_c0_seq1_m.52394	-0.462902	-0.460634	0.000794743	0.00974436	0.0114271	0	71	71	142
comp2262731_c0_seq1_m.56213	0.712576	0.702604	0.000766526	0.00478195	0.0114271	0	72	72	144
comp2268798_c0_seq2_m.66233	0.604204	0.599646	0.000788195	0.00649624	0.0114271	0	73	73	146
comp2270576_c0_seq1_m.69463	0.789077	0.775273	0.000786345	0.00396992	0.0114271	0	74	74	148
comp2204754_c0_seq1_m.13720	0.603077	0.598812	0.000832313	0.00667669	0.0115614	0	75	75	150
comp2265768_c0_seq2_m.60943	-0.707601	-0.721138	0.00085895	0.00505263	0.0115614	0	76	76	152
comp2272547_c0_seq4_m.73421	-0.43354	-0.435062	0.000848691	0.0106532	0.0115614	0	77	77	154
comp2275701_c1_seq1_m.80440	0.884686	0.876985	0.000869275	0.00297744	0.0115614	0	78	78	156
comp2277114_c1_seq1_m.84278	0.827324	0.849284	0.000837023	0.0035188	0.0115614	0	79	79	158
comp2278480_c0_seq4_m.89330	0.565397	0.568285	0.000843028	0.00748872	0.0115614	0	80	80	160
comp2252746_c0_seq1_m.41651	-0.471775	-0.47499	0.000905947	0.010015	0.0118544	0	81	81	162
comp2269611_c0_seq1_m.67728	0.484338	0.48214	0.00091359	0.00947368	0.0118544	0	82	82	164
comp2272782_c0_seq2_m.73955	-0.569384	-0.564158	0.000926586	0.00784962	0.0118782	0	83	83	166
comp2269814_c0_seq1_m.68069	0.462093	0.460441	0.000939591	0.0103825	0.0119015	0	84	84	168
comp1876805_c0_seq1_m.2339	0.43275	0.431416	0.000977541	0.0114652	0.0120407	0	85	85	170
comp1916779_c0_seq1_m.2944	-0.46801	-0.46636	0.000964916	0.0102021	0.0120407	0	86	86	172
comp2273141_c0_seq2_m.74737	0.328552	0.328819	0.000984528	0.0124577	0.0120407	0	87	87	174
comp2263612_c1_seq1_m.57550	-0.331528	-0.33212	0.00113123	0.0141786	0.0131413	0	88	88	176
comp2274693_c0_seq1_m.78142	0.498853	0.497536	0.00111403	0.00983459	0.0131413	0	89	89	178
comp2278010_c1_seq9_m.87231	-0.66559	-0.680017	0.00110703	0.00622556	0.0131413	0	90	90	180
comp2278480_c1_seq1_m.89333	0.376687	0.375389	0.00113628	0.0136372	0.0131413	0	91	91	182
gnl_Pdu_trscr_assembly_1_1514_m.69841	0.76847	0.790495	0.00109538	0.00496241	0.0131413	0	92	92	184
comp2275523_c0_seq29_m.80039	0.685191	0.6953	0.00116399	0.00595489	0.0133171	0	93	93	186
comp2249227_c0_seq1_m.37479	-0.389994	-0.392612	0.00118516	0.0132763	0.013415	0	94	94	188
comp2271567_c0_seq1_m.71391	0.547034	0.549803	0.00129145	0.00893233	0.0142828	0	95	95	190
comp2279536_c0_seq1_m.91140	-0.445699	-0.44665	0.00128039	0.0119164	0.0142828	0	97	96	193
comp2257633_c0_seq1_m.48279	-0.457247	-0.456418	0.00134592	0.0117359	0.0146128	0	98	97	195
comp2138952_c0_seq1_m.6867	0.621791	0.614169	0.0014578	0.0081203	0.0147459	0	99	98	197
comp2257674_c0_seq1_m.48339	1.35334	1.36341	0.00149272	0.00225564	0.0147459	0	102	99	201
comp2266507_c0_seq10_m.62138	-0.56103	-0.551171	0.00152448	0.00911278	0.0147459	0	103	100	203
comp2268869_c0_seq6_m.66344	0.859014	0.891019	0.0015197	0.00469173	0.0147459	0	104	101	205
comp2269850_c0_seq1_m.68122	0.539307	0.548416	0.00142327	0.00956391	0.0147459	0	105	102	207
comp2271675_c0_seq2_m.71655	1.08071	1.07753	0.0014155	0.00270677	0.0147459	0	106	103	209
comp2275391_c0_seq1_m.79711	-0.630686	-0.633078	0.00149027	0.00793985	0.0147459	0	108	104	212
comp2276440_c0_seq2_m.82383	0.413605	0.417744	0.00143937	0.0133665	0.0147459	0	109	105	214
comp2278474_c0_seq1_m.89294	-0.38355	-0.386457	0.00150744	0.0153534	0.0147459	0	110	106	216
comp2244716_c0_seq1_m.32883	0.513832	0.510261	0.00163116	0.0109239	0.0149041	0	112	107	219
comp2257781_c0_seq1_m.48513	0.406977	0.405295	0.00161979	0.0145442	0.0149041	0	114	108	222
comp2264302_c0_seq2_m.58699	-0.602127	-0.616009	0.00166032	0.0084812	0.0149041	0	116	109	225
comp2270220_c0_seq1_m.68776	0.505176	0.498818	0.00164291	0.0112848	0.0149041	0	117	110	227
comp2271916_c0_seq1_m.72122	0.446167	0.442568	0.00163653	0.0130056	0.0149041	0	118	111	229
comp2277374_c0_seq2_m.85051	0.751772	0.740439	0.00168091	0.00604511	0.0149041	0	120	112	232
comp2253875_c0_seq1_m.43271	0.487449	0.484131	0.0018362	0.0120066	0.0157558	0	124	113	237
comp2238188_c0_seq1_m.27576	-0.668445	-0.647406	0.00207395	0.00830075	0.0164267	0	129	114	243
comp2257070_c0_seq2_m.47512	0.749363	0.772047	0.00206992	0.00685714	0.0164267	0	131	115	246
comp2267634_c0_seq2_m.64174	-0.478195	-0.479343	0.00211636	0.0129154	0.0164267	0	133	116	249
comp2271595_c0_seq2_m.71452	0.426928	0.430868	0.00210723	0.0152632	0.0164267	0	134	117	251
comp2271871_c0_seq8_m.72023	0.480271	0.47179	0.00205665	0.012735	0.0164267	0	136	118	254
comp2277605_c1_seq7_m.85828	0.457639	0.450577	0.00212764	0.013547	0.0164267	0	137	119	256
comp2280178_c0_seq1_m.91219	-0.521942	-0.520687	0.00205997	0.0115555	0.0164267	0	138	120	258
comp2276577_c0_seq8_m.92288	0.901041	0.935228	0.00219831	0.00523308	0.0168273	0	139	121	260
comp2261379_c0_seq1_m.54133	-0.507171	-0.517012	0.00224878	0.012187	0.01685	0	140	122	262
comp2274999_c0_seq4_m.78837	0.458312	0.456298	0.00224543	0.0139079	0.01685	0	142	123	265
comp2268194_c0_seq1_m.65186	-0.444739	-0.451499	0.00229982	0.0147246	0.0169931	0	143	124	267
gnl_Pdu_trscr_assembly_1_2589_m.58494	-0.448349	-0.454885	0.00241569	0.0148148	0.017485	0	147	125	272
comp2274301_c0_seq6_m.77327	0.608534	0.604801	0.00249982	0.00992481	0.0176147	0	151	126	277
gnl_Pdu_trscr_assembly_1_200732_m.91055	-0.674055	-0.66314	0.00253383	0.00839098	0.0177368	0	152	127	279
comp2274474_c0_seq5_m.77718	-0.644882	-0.666004	0.00264961	0.00920301	0.0182898	0	156	128	284
comp1953077_c0_seq1_m.3483	-0.579589	-0.586323	0.0027634	0.0111945	0.0183537	0	157	129	286
comp1977957_c0_seq1_m.3878	0.525929	0.530311	0.00279296	0.0122773	0.0183537	0	158	130	288
comp2243933_c0_seq1_m.32211	-0.492499	-0.502477	0.00281171	0.0134568	0.0183537	0	159	131	290
comp2251806_c0_seq1_m.40480	-0.333089	-0.332987	0.00142243	0.0174483	0.0147459	0.00540541	101	189	290
comp2251386_c0_seq2_m.40044	-0.466809	-0.461926	0.00277057	0.0146344	0.0183537	0	160	132	292
comp2275241_c0_seq5_m.79383	0.339244	0.337931	0.00149899	0.0178111	0.0147459	0.00531915	107	186	293
comp2265656_c0_seq3_m.60780	0.791107	0.826902	0.00281156	0.00721805	0.0183537	0	161	133	294
comp2204672_c0_seq1_m.13711	-0.337789	-0.338992	0.00139057	0.0169972	0.0147459	0.00555556	100	194	294
comp2276389_c1_seq15_m.82250	-0.337623	-0.336089	0.00167524	0.0190874	0.0149041	0.00505051	119	176	295
comp2276668_c0_seq1_m.83017	-0.523511	-0.536286	0.00276983	0.0123675	0.0183537	0	162	134	296
comp2259363_c0_seq16_m.50888	0.346974	0.345307	0.00158178	0.0179013	0.0149041	0.00529101	115	185	300
comp2265049_c0_seq3_m.59764	0.693022	0.674567	0.00299364	0.00875188	0.0189597	0	166	135	301
comp2274295_c0_seq2_m.77311	0.594493	0.613698	0.00299281	0.0111043	0.0189597	0	167	136	303
comp2278366_c0_seq5_m.88731	-0.351057	-0.35252	0.0013021	0.0157387	0.0142828	0.00598802	96	207	303
comp2278509_c0_seq8_m.89637	0.360978	0.363553	0.00173296	0.0182688	0.0152386	0.0052356	121	183	304
comp2276805_c0_seq8_m.83380	0.600618	0.61878	0.00299245	0.0107434	0.0189597	0	168	137	305
comp2260103_c0_seq1_m.51994	-0.367187	-0.368878	0.001792	0.0181786	0.0155118	0.00526316	122	184	306
comp2281676_c0_seq1_m.91255	0.573055	0.559673	0.00313165	0.0116457	0.0196005	0	170	138	308
comp2246514_c1_seq1_m.34691	-0.379658	-0.382118	0.00213052	0.0187274	0.0164267	0.00512821	130	179	309
comp2236992_c0_seq1_m.26663	-0.378667	-0.380975	0.00160258	0.0165508	0.0149041	0.00568182	111	198	309
gnl_Pdu_trscr_assembly_1_14069_m.67140	-0.375046	-0.371878	0.00179319	0.0177209	0.0155118	0.00534759	123	187	310
gnl_Pdu_trscr_assembly_1_11607_m.26425	0.571861	0.560593	0.00326439	0.0118261	0.0200769	0	173	139	312
comp2254675_c0_seq1_m.44244	-0.385908	-0.383451	0.00194724	0.0176306	0.0162343	0.00537634	127	188	315
comp2273417_c0_seq5_m.75297	-0.511515	-0.524242	0.0033988	0.0138177	0.0204312	0	177	140	317
comp2254456_c0_seq2_m.43993	0.382037	0.383059	0.00156509	0.0158289	0.0149041	0.00595238	113	206	319
comp2254520_c0_seq1_m.44059	-0.530838	-0.51973	0.0035419	0.0131861	0.0210535	0	179	141	320
comp2276593_c0_seq3_m.82791	0.394783	0.390997	0.0018966	0.0168214	0.0160157	0.00558659	126	195	321
comp2263346_c1_seq31_m.57192	-0.401296	-0.399741	0.00209505	0.0172679	0.0164267	0.00546448	132	191	323
comp2272118_c0_seq11_m.72524	0.510213	0.523247	0.0036516	0.0142688	0.0213478	0	182	142	324
comp2275445_c0_seq2_m.79869	-0.399695	-0.403622	0.00186433	0.0162801	0.0158692	0.00578035	125	201	326
comp2261183_c0_seq1_m.53867	0.502021	0.500829	0.00388659	0.0150827	0.0219964	0	188	143	331
comp2271413_c1_seq5_m.70995	-0.407606	-0.411079	0.001953	0.0160094	0.0162343	0.00588235	128	204	332
comp2272691_c0_seq4_m.73750	0.874205	0.924877	0.00404411	0.0073985	0.0224111	0	192	144	336
comp1196959_c0_seq2_m.1014	0.410092	0.412267	0.00293182	0.0192679	0.0189058	0.005	165	174	339
gnl_Pdu_trscr_assembly_1_16061_m.43221	-0.419045	-0.424979	0.00229013	0.0167312	0.0169931	0.00561798	144	196	340
comp2263394_c0_seq1_m.57263	0.537843	0.528392	0.00425886	0.0140883	0.0231195	0	196	145	341
comp2263508_c0_seq1_m.57408	0.563737	0.564676	0.00433737	0.0130959	0.0234262	0	197	146	343
comp2272254_c0_seq4_m.72822	-0.590611	-0.607371	0.00448431	0.0126447	0.0237379	0	200	147	347
comp2274909_c0_seq7_m.78615	1.38765	1.49062	0.00482845	0.00451128	0.0251837	0	203	148	351
comp1194290_c0_seq1_m.781	-0.703064	-0.66911	0.00510126	0.0108336	0.0256212	0	205	149	354
comp2233700_c1_seq1_m.24550	0.780977	0.808941	0.00502381	0.00938346	0.0256212	0	207	150	357
comp2271667_c0_seq1_m.71637	0.309512	0.309964	0.00203201	0.021688	0.0164267	0.00925926	135	223	358
comp2263822_c0_seq1_m.57945	0.305599	0.304537	0.00247225	0.0233214	0.0175365	0.00869565	150	209	359
comp2265370_c0_seq1_m.60276	-0.280879	-0.280575	0.00263134	0.0234117	0.0182898	0.00865801	154	208	362
comp2260960_c0_seq2_m.53456	0.839309	0.821985	0.00524169	0.00857143	0.0256212	0	213	151	364
comp2250982_c0_seq1_m.39507	0.330038	0.330945	0.002331	0.022141	0.0171047	0.00909091	145	219	364
comp2275893_c0_seq1_m.80933	-0.730284	-0.715093	0.00527353	0.0104727	0.0256212	0	216	152	368
comp2254167_c0_seq1_m.43587	0.345276	0.34258	0.0023767	0.0217782	0.0173206	0.00921659	146	222	368
comp2268443_c0_seq2_m.65634	0.347783	0.345238	0.00222973	0.0208289	0.01685	0.00943396	141	227	368
gnl_Pdu_trscr_assembly_1_15590_m.29311	1.26888	1.35316	0.00493907	0.00514286	0.0256212	0	219	153	372
comp2275853_c0_seq1_m.80817	0.460038	0.450501	0.00408892	0.0184492	0.022542	0.00518135	193	181	374
comp2224014_c0_seq1_m.19704	-0.357149	-0.353709	0.00266932	0.0219605	0.0182898	0.00917431	153	221	374
comp2278471_c0_seq8_m.89279	0.354815	0.352574	0.00244598	0.0215075	0.0175318	0.00934579	149	225	374
comp2268473_c1_seq1_m.65668	0.708034	0.69682	0.00534783	0.0110141	0.025747	0	221	154	375
comp2275107_c0_seq4_m.79080	-0.339089	-0.336295	0.00284934	0.0229615	0.0184859	0.00881057	164	212	376
comp2274581_c1_seq21_m.92631	-0.367255	-0.370311	0.00245511	0.0205432	0.0175318	0.00952381	148	229	377
comp2141997_c0_seq1_m.7386	1.15773	1.20979	0.0056252	0.00613534	0.0263666	0	224	155	379
comp2261876_c0_seq1_m.54865	0.62553	0.653552	0.00558159	0.0128252	0.0263666	0	226	156	382
comp2275714_c2_seq1_m.80469	-0.462756	-0.45036	0.00504975	0.0195385	0.0256212	0.00492611	215	171	386
comp2269201_c0_seq1_m.67004	-0.843066	-0.886393	0.00583811	0.00902256	0.0270076	0	230	157	387
comp2260649_c0_seq2_m.52797	0.478403	0.466571	0.00521767	0.0191776	0.0256212	0.00502513	212	175	387
comp2268937_c0_seq1_m.66472	0.484278	0.492445	0.00380713	0.0161898	0.021662	0.00581395	186	202	388
comp1198575_c0_seq1_m.1066	-0.369542	-0.365851	0.00319076	0.0223214	0.0197382	0.00900901	171	217	388
comp2252186_c0_seq3_m.40915	-0.563758	-0.571439	0.00592043	0.0151729	0.0271523	0	232	158	390
comp2269698_c0_seq1_m.67864	0.366623	0.366765	0.00359933	0.0230517	0.0212761	0.00877193	180	211	391
comp2254346_c0_seq1_m.43876	0.816103	0.848956	0.00602958	0.00965414	0.0273411	0	234	159	393
comp2265471_c0_seq5_m.60488	0.37954	0.376593	0.0033791	0.0220508	0.0204282	0.00913242	176	220	396
comp2273356_c0_seq1_m.75157	0.296094	0.296904	0.00268159	0.0240423	0.0182898	0.0127119	155	248	403
comp2279523_c0_seq1_m.91136	-0.380231	-0.380542	0.00418891	0.0232312	0.0228564	0.00873362	195	210	405
comp2275478_c0_seq7_m.79935	0.385356	0.380294	0.00399809	0.0225019	0.0223893	0.00892857	190	215	405
comp2265883_c1_seq1_m.61140	0.633973	0.610993	0.00704416	0.0137274	0.0303441	0	247	160	407
comp2266233_c0_seq1_m.61658	0.76663	0.725596	0.00714521	0.011375	0.0305321	0	249	161	410
comp2264888_c0_seq4_m.59493	0.711656	0.686753	0.00722866	0.0120968	0.0306426	0	250	162	412
comp2250201_c0_seq1_m.38525	0.323572	0.32496	0.00317722	0.0250498	0.0197382	0.0122951	172	240	412
comp2269593_c0_seq3_m.67692	0.322608	0.32061	0.00311475	0.0247791	0.0196005	0.0124481	169	243	412
comp2278306_c0_seq2_m.88465	0.316957	0.318821	0.00276919	0.02386	0.0183537	0.012766	163	249	412
comp2271225_c0_seq5_m.70641	-0.512782	-0.529512	0.00643681	0.0189972	0.0287763	0.00507614	238	177	415
comp2276743_c1_seq1_m.83170	0.331028	0.32854	0.00372405	0.0259821	0.0215914	0.0119522	184	233	417
comp1194106_c0_seq1_m.742	0.332895	0.333326	0.00330532	0.0245987	0.0202094	0.0125523	174	245	419
comp2275191_c0_seq1_m.79281	0.337588	0.335075	0.00379695	0.0256964	0.021662	0.012	187	234	421
comp2235681_c0_seq1_m.25791	-0.411728	-0.417842	0.00514274	0.0225921	0.0256212	0.00888889	208	214	422
comp2261018_c0_seq2_m.53614	-0.34162	-0.345134	0.0036302	0.0249596	0.0213399	0.0123457	181	241	422
comp2257070_c0_seq2_m.47513	0.41027	0.409801	0.00510864	0.0226823	0.0256212	0.00884956	211	213	424
comp2275191_c1_seq2_m.79282	0.427263	0.418359	0.00465871	0.0215977	0.0245389	0.00930233	202	224	426
comp2278623_c0_seq6_m.90693	0.427462	0.431246	0.00438462	0.0207387	0.0235583	0.00947867	199	228	427
comp2254394_c0_seq2_m.43926	-0.348405	-0.347517	0.00402735	0.0254107	0.0224111	0.0120968	191	236	427
comp2278133_c0_seq3_m.87701	0.354975	0.35072	0.00348028	0.0235893	0.0208035	0.012931	178	252	430
gi_613484551	0.537143	0.552314	0.00726485	0.0186372	0.0306738	0.00515464	252	180	432
comp2242282_c0_seq1_m.30761	-0.358039	-0.362767	0.00418146	0.0248694	0.0228564	0.0123967	194	242	436
comp2274909_c0_seq7_m.78613	1.29738	1.40528	0.00944805	0.00757895	0.0359475	0	276	163	439
comp2276314_c0_seq1_m.82075	0.561138	0.547693	0.00707605	0.0171776	0.0303585	0.00549451	248	192	440
comp2275674_c1_seq1_m.80370	-0.647748	-0.652428	0.00942909	0.0154436	0.0359475	0	277	164	441
comp2275933_c0_seq1_m.81045	0.563612	0.572403	0.00649332	0.0160996	0.0289075	0.00584795	239	203	442
comp2276160_c0_seq4_m.81678	-0.441437	-0.448257	0.00507472	0.0210244	0.0256212	0.00938967	217	226	443
comp2272437_c1_seq1_m.73204	-0.572483	-0.547642	0.00761655	0.0173581	0.0319055	0.00543478	254	190	444
comp2277945_c0_seq2_m.86985	0.539995	0.56567	0.0092926	0.0200883	0.0359475	0.00483092	280	167	447
comp2272842_c0_seq2_m.74081	-0.56058	-0.587554	0.00919575	0.0193581	0.0359475	0.00497512	274	173	447
comp2275625_c0_seq11_m.80264	-0.56568	-0.593263	0.00885194	0.018907	0.0350129	0.00510204	269	178	447
comp2276825_c0_seq1_m.83424	0.374862	0.374819	0.00480642	0.0246889	0.0251837	0.0125	204	244	448
comp2273778_c1_seq23_m.76059	0.558005	0.577812	0.00961476	0.019719	0.0361488	0.00487805	283	169	452
comp2273519_c1_seq9_m.75533	0.580963	0.58569	0.00734116	0.0164605	0.0308735	0.00571429	253	199	452
gnl_Pdu_trscr_assembly_1_1986_m.5698	-0.443609	-0.455496	0.00631735	0.0224117	0.0283614	0.00896861	237	216	453
comp2269110_c0_seq3_m.66810	-0.303921	-0.302448	0.00332392	0.0270789	0.0202094	0.015625	175	278	453
comp2212572_c0_seq1_m.15390	0.31035	0.309992	0.00373385	0.0278026	0.0215914	0.0153257	183	273	456
comp1926910_c0_seq1_m.3122	-0.310983	-0.308899	0.00376811	0.0278929	0.021662	0.0152672	185	272	457
comp2277680_c0_seq25_m.86056	-0.313745	-0.31214	0.00397604	0.0281635	0.0223836	0.0150943	189	269	458
comp2276426_c0_seq2_m.82339	-0.380214	-0.386353	0.00538239	0.0253205	0.0257967	0.0121457	222	237	459
comp2277134_c1_seq4_m.84342	0.302812	0.303011	0.00446519	0.0298008	0.0237379	0.0145455	201	259	460
comp2275822_c0_seq10_m.80745	-0.388807	-0.396551	0.00578671	0.02514	0.0268867	0.0122449	229	239	468
comp2261395_c0_seq1_m.54150	0.632351	0.600272	0.00937859	0.0163703	0.0359475	0.00574713	271	200	471
comp2278536_c1_seq38_m.89884	0.397887	0.40627	0.00542237	0.0237697	0.0258718	0.0128205	223	250	473
comp2222959_c0_seq1_m.19328	-0.617336	-0.634944	0.0106407	0.018359	0.0383809	0.00520833	294	182	476
comp2269627_c0_seq2_m.67749	0.405578	0.414678	0.005554	0.0236795	0.0263666	0.0128755	227	251	478
comp2254426_c0_seq1_m.43954	-0.409869	-0.419835	0.00702173	0.0252303	0.0303441	0.0121951	246	238	484
comp2278630_c0_seq8_m.90809	-0.33007	-0.333714	0.00498526	0.0285226	0.0256212	0.0149254	218	266	484
comp2252318_c0_seq1_m.41154	-0.335934	-0.337484	0.0057762	0.029625	0.0268867	0.0145985	228	260	488
comp2272435_c0_seq2_m.73201	0.829708	0.784025	0.014153	0.0139981	0.0463349	0	325	165	490
comp2272433_c0_seq1_m.73197	0.35549	0.353773	0.00520835	0.0273468	0.0256212	0.0155039	214	276	490
comp2277313_c0_seq3_m.84866	0.511248	0.497523	0.00795271	0.020453	0.0324202	0.00956938	261	230	491
comp2226333_c0_seq1_m.20670	-0.283451	-0.2824	0.00440611	0.0307932	0.0235583	0.0176678	198	293	491
comp2107035_c0_seq2_m.6021	-0.297849	-0.299028	0.00521245	0.031609	0.0256212	0.0173611	206	288	494
comp2244437_c0_seq1_m.32653	-0.349247	-0.346985	0.00687895	0.0300714	0.0301202	0.0143885	243	256	499
comp2278333_c0_seq10_m.88591	-0.348039	-0.353829	0.00602361	0.0286128	0.0273411	0.0148699	235	265	500
comp2274961_c0_seq5_m.78739	-0.360798	-0.357974	0.00588141	0.0279831	0.0270901	0.0152091	231	271	502
comp2277759_c0_seq3_m.86312	0.361152	0.357103	0.00609481	0.0282538	0.0274783	0.0150376	236	268	504
comp2273765_c1_seq6_m.76032	0.694946	0.725537	0.0164628	0.0194483	0.0510682	0.0049505	343	172	515
comp2280482_c0_seq1_m.91228	-0.365976	-0.372381	0.00722297	0.028703	0.0306426	0.0148148	251	264	515
comp2263250_c0_seq1_m.57052	-0.361033	-0.354823	0.00817026	0.0303421	0.0327726	0.0142349	265	253	518
comp2267341_c0_seq1_m.63653	-0.266426	-0.265158	0.00532064	0.0340602	0.0257326	0.0192926	220	301	521
comp2276528_c1_seq4_m.82615	0.869547	0.932363	0.0175524	0.0149925	0.0525118	0	357	166	523
comp2257487_c0_seq1_m.48064	-0.247014	-0.247026	0.00561587	0.0345056	0.0263666	0.0191083	225	298	523
comp2253077_c0_seq1_m.42045	0.281145	0.282619	0.00527266	0.0326992	0.0256212	0.020202	210	315	525
comp2249005_c0_seq2_m.37257	0.280438	0.280806	0.00516244	0.0325188	0.0256212	0.020339	209	317	526
comp2271594_c0_seq8_m.71451	-0.563165	-0.582485	0.0107001	0.020266	0.0384627	0.00961538	296	231	527
comp2270385_c0_seq11_m.69105	0.452702	0.448683	0.0108808	0.0261617	0.0389305	0.0119048	298	232	530
comp2279340_c0_seq1_m.91103	0.713648	0.771275	0.0178649	0.0196288	0.0526546	0.00490196	361	170	531
comp2277617_c1_seq7_m.85877	-0.294802	-0.296286	0.00665041	0.0348618	0.0293612	0.0189274	241	295	536
comp2270828_c0_seq11_m.69939	-0.404402	-0.409631	0.00777194	0.0268985	0.0320545	0.015748	258	280	538
comp2272920_c0_seq1_m.74280	0.407988	0.409357	0.00809163	0.0269887	0.0327146	0.0156863	264	279	543
comp2261362_c0_seq2_m.54116	0.826901	0.747715	0.0177671	0.016641	0.0525118	0.00564972	349	197	546
comp2275616_c0_seq2_m.80253	0.38983	0.381696	0.0104409	0.0302519	0.0382521	0.0142857	292	254	546
comp2274043_c0_seq7_m.76739	-0.396467	-0.408383	0.0105294	0.029891	0.0382521	0.0144928	291	258	549
comp2279450_c0_seq1_m.91124	0.341361	0.337599	0.00867377	0.0322425	0.0344362	0.0170068	268	282	550
comp2271350_c0_seq18_m.70898	0.308513	0.30436	0.00684045	0.0333308	0.0300754	0.0197368	242	308	550
comp2268978_c0_seq1_m.66540	0.764358	0.841522	0.0208135	0.0199981	0.0576708	0.00485437	384	168	552
comp2234079_c0_seq2_m.24745	0.355619	0.349466	0.00785192	0.0305179	0.0322565	0.0177305	259	294	553
comp2263771_c0_seq2_m.57851	0.308798	0.309726	0.00664205	0.0328797	0.0293612	0.0200669	240	313	553
comp2202068_c0_seq1_m.13304	-0.259987	-0.260387	0.00603868	0.0361795	0.0273411	0.0216718	233	320	553
comp2264022_c0_seq13_m.58310	0.353768	0.349382	0.00811715	0.03125	0.0327146	0.0175439	263	291	554
comp2270085_c0_seq9_m.68531	0.356001	0.355003	0.00936197	0.0318797	0.0359475	0.0171821	273	285	558
comp2197446_c0_seq1_m.12404	0.315659	0.313765	0.0069753	0.0327895	0.0302981	0.0201342	244	314	558
comp2271637_c0_seq1_m.71562	0.404411	0.406609	0.0114355	0.0301617	0.0398929	0.0143369	305	255	560
comp2273813_c0_seq2_m.76128	0.320552	0.322105	0.0076518	0.0332406	0.0319275	0.019802	255	309	564
gnl_Pdu_trscr_assembly_1_7274_m.39240	0.843525	0.860085	0.0177371	0.0159192	0.0525118	0.00591716	360	205	565
comp2256245_c0_seq1_m.46340	-0.337454	-0.341986	0.00949652	0.034328	0.0359475	0.0191693	270	299	569
comp2277982_c0_seq2_m.87136	0.325004	0.326089	0.00790844	0.0331504	0.0323638	0.0198675	260	310	570
comp2277995_c0_seq1_m.87177	0.429744	0.445854	0.0113005	0.028344	0.0396283	0.0149813	304	267	571
comp2270905_c1_seq5_m.70069	-0.370951	-0.362378	0.0103573	0.0316992	0.0382521	0.017301	290	287	577
comp2271944_c0_seq11_m.72172	0.440192	0.441031	0.011738	0.0280733	0.0405495	0.0151515	308	270	578
comp2259349_c0_seq2_m.50877	-0.449523	-0.455745	0.0109035	0.0265216	0.0389305	0.0158103	297	281	578
comp2273257_c0_seq9_m.74986	0.535222	0.522259	0.0153751	0.0244117	0.0491722	0.012605	334	246	580
gnl_Pdu_trscr_assembly_1_200732_m.91056	-0.541471	-0.505421	0.0170341	0.0255009	0.0522314	0.0120482	347	235	582
comp2261150_c0_seq1_m.53829	0.443998	0.437878	0.0117774	0.0277124	0.0405539	0.0153846	309	274	583
comp2262441_c0_seq1_m.55760	-0.3021	-0.300863	0.00804082	0.0359925	0.0326543	0.0217391	262	321	583
comp2272683_c0_seq1_m.73725	0.236672	0.236399	0.00697653	0.037578	0.0302981	0.0272727	245	339	584
comp2271307_c0_seq1_m.70799	-0.382025	-0.382607	0.0106413	0.0313402	0.0383809	0.0174825	295	290	585
comp2269326_c0_seq2_m.67220	-0.265068	-0.267226	0.00775931	0.0389821	0.0320545	0.0266272	257	331	588
comp2277933_c1_seq7_m.86946	0.289614	0.29327	0.00819315	0.0370235	0.0327726	0.0243902	266	326	592
comp2248808_c0_seq2_m.37043	-0.674373	-0.736594	0.0202953	0.0222312	0.0569769	0.00904977	378	218	596
comp2258193_c0_seq1_m.49089	-0.250388	-0.248992	0.00777263	0.0397942	0.0320545	0.03207	256	343	599
comp2272882_c0_seq14_m.74184	-0.565694	-0.528962	0.0177623	0.0243214	0.0525118	0.0126582	355	247	602
comp2273599_c0_seq7_m.75677	0.361456	0.372444	0.0125005	0.0346814	0.0424361	0.0190476	313	297	610
comp2246119_c0_seq1_m.34306	0.334328	0.327444	0.0104262	0.0354164	0.0382521	0.0218069	288	322	610
comp2132126_c0_seq4_m.6558	0.406615	0.414006	0.0148231	0.0320602	0.0479385	0.0170648	328	283	611
comp2262317_c0_seq2_m.55577	0.36369	0.355	0.0121515	0.0342378	0.041573	0.0192308	311	300	611
comp2236614_c0_seq1_m.26450	0.335449	0.339541	0.0102813	0.0351457	0.0381159	0.0220126	286	325	611
comp2276743_c0_seq1_m.83169	0.32786	0.328623	0.0105337	0.0362697	0.0382521	0.0216049	293	319	612
comp2276413_c0_seq21_m.82313	-0.29133	-0.291669	0.00950468	0.038609	0.0359475	0.0267857	279	333	612
comp2277142_c0_seq6_m.84365	0.465896	0.490715	0.0175486	0.0299812	0.0525118	0.0144404	358	257	615
comp2266500_c0_seq1_m.62123	-0.368458	-0.376196	0.0124211	0.0338797	0.0423591	0.0194175	312	303	615
comp2275769_c0_seq3_m.80583	0.293312	0.29118	0.00941891	0.0381504	0.0359475	0.0271084	278	337	615
gnl_Pdu_trscr_assembly_1_3867_m.65412	1.12072	1.27649	0.0293241	0.0170874	0.0735868	0.00552486	424	193	617
comp2247176_c0_seq3_m.35337	-0.297755	-0.293814	0.0101179	0.0385188	0.0379066	0.0268657	284	334	618
comp2278363_c0_seq7_m.88713	-0.269459	-0.27226	0.00914489	0.0407904	0.0359475	0.034384	281	344	625
comp1199432_c0_seq1_m.1095	-0.377456	-0.372018	0.0132132	0.0336917	0.0435258	0.0194805	322	304	626
comp2265703_c0_seq1_m.60844	-0.425113	-0.430748	0.0162316	0.0317895	0.0504985	0.0172414	342	286	628
comp2272299_c0_seq11_m.72914	-0.385532	-0.400276	0.0154134	0.0347716	0.0491722	0.0189873	332	296	628
comp2228430_c0_seq1_m.21640	0.34577	0.341959	0.0116104	0.0353261	0.0402394	0.021875	307	323	630
comp2271535_c0_seq1_m.71319	0.285296	0.281996	0.0102489	0.0405066	0.0381159	0.0344828	287	345	632
comp2270148_c0_seq3_m.68661	-0.227394	-0.226845	0.00858795	0.0415301	0.0342231	0.0369318	267	366	633
gnl_Pdu_trscr_assembly_1_17807_m.62055	0.260359	0.260755	0.00952743	0.0428947	0.0359475	0.0360111	282	357	639
comp2271906_c0_seq1_m.72107	0.398082	0.404995	0.0160037	0.0339699	0.0499352	0.0193548	340	302	642
comp2273142_c0_seq1_m.74744	-0.397484	-0.410134	0.0153227	0.0330602	0.0491722	0.0199336	333	311	644
comp2273017_c0_seq1_m.74484	-0.242824	-0.244177	0.00942239	0.0450573	0.0359475	0.0376344	275	369	644
comp2264855_c0_seq1_m.59451	-0.270612	-0.267895	0.0104745	0.0430827	0.0382521	0.0359116	289	356	645
comp2269906_c0_seq2_m.68214	-0.361499	-0.362107	0.0131921	0.0352359	0.0435258	0.0219436	323	324	647
comp2278276_c0_seq16_m.88350	0.366318	0.360311	0.0152053	0.03636	0.0490257	0.0215385	330	318	648
comp2270845_c1_seq1_m.69967	0.320265	0.321177	0.012649	0.0384286	0.0424809	0.0269461	317	335	652
comp2263983_c0_seq1_m.58208	0.238467	0.237273	0.00937684	0.0454201	0.0359475	0.0402145	272	380	652
comp1785956_c0_seq1_m.2259	0.413174	0.394165	0.0175442	0.0336015	0.0525118	0.019544	348	305	653
comp2276968_c0_seq3_m.83862	0.348407	0.340374	0.0143382	0.0368412	0.046797	0.0244648	326	327	653
comp2276804_c0_seq1_m.83376	-0.52054	-0.499595	0.0221008	0.0291673	0.0596833	0.014652	394	261	655
comp2273193_c0_seq1_m.74830	-0.453509	-0.476269	0.0183827	0.0314305	0.0534406	0.0174216	366	289	655
comp2275406_c1_seq7_m.79751	0.257176	0.256195	0.0101755	0.0447566	0.0379884	0.0377358	285	370	655
comp2214845_c0_seq1_m.16111	0.329395	0.321336	0.0131077	0.0377735	0.0434473	0.0271903	321	338	659
comp2270996_c0_seq5_m.70236	0.537467	0.50302	0.0237103	0.0290771	0.0633863	0.0147059	398	262	660
comp2266680_c0_seq1_m.62479	-0.281397	-0.282119	0.0111896	0.0423496	0.0395639	0.0364146	301	361	662
comp2252059_c0_seq1_m.40786	0.283337	0.279543	0.0126601	0.0441212	0.0424809	0.0353261	315	350	665
comp2262360_c0_seq1_m.55644	-0.547434	-0.575185	0.0243999	0.02889	0.0644205	0.0147601	403	263	666
gnl_Pdu_trscr_assembly_1_3048_m.12984	0.308456	0.310807	0.0126962	0.0401457	0.0424809	0.0348837	318	349	667
comp2250906_c0_seq2_m.39444	-0.285634	-0.288475	0.0127487	0.0438506	0.0425222	0.0356164	319	353	672
comp1194322_c0_seq2_m.793	0.255557	0.253602	0.0111924	0.0470122	0.0395639	0.0394737	300	373	673
comp2280591_c0_seq1_m.91233	0.59007	0.547468	0.0239389	0.0272566	0.0638039	0.0155642	401	277	678
comp2262720_c0_seq1_m.56199	0.351825	0.340194	0.0172229	0.0386992	0.0525118	0.0267062	350	332	682
comp2274242_c0_seq2_m.77187	-0.247451	-0.24569	0.0113224	0.0498468	0.0396283	0.046875	303	381	684
comp2246502_c0_seq1_m.34680	-0.305929	-0.298935	0.0158475	0.044031	0.0499352	0.0354223	336	351	687
comp2272863_c1_seq5_m.74143	-0.251355	-0.250795	0.0114829	0.0490179	0.0399275	0.0469974	306	382	688
comp2269345_c0_seq1_m.67253	0.312689	0.313002	0.0160001	0.0431729	0.0499352	0.0358127	338	355	693
comp2272233_c0_seq1_m.72760	-0.247236	-0.247722	0.0119583	0.0506852	0.0410438	0.0489691	310	385	695
comp2279272_c0_seq1_m.91086	0.262307	0.261577	0.0125234	0.0488374	0.0424361	0.0472441	314	384	698
comp2279297_c0_seq1_m.91091	0.21892	0.218248	0.0112339	0.0519906	0.039579	0.0510204	302	400	702
comp2265077_c0_seq1_m.59810	-0.222493	-0.221807	0.0110981	0.0515357	0.039493	0.0514139	299	403	702
gnl_Pdu_trscr_assembly_1_4228_m.63259	-0.449508	-0.462309	0.0222894	0.0335113	0.0598194	0.0196078	397	306	703
comp2267483_c0_seq3_m.63903	-0.325915	-0.335253	0.0175794	0.0427171	0.0525118	0.0361111	351	358	709
comp2260797_c0_seq1_m.53088	-0.247593	-0.245002	0.0126964	0.0528045	0.0424809	0.0503778	316	395	711
comp2245511_c0_seq1_m.33658	-0.358027	-0.370447	0.0197648	0.0396156	0.0559302	0.0292398	376	341	717
comp2258437_c0_seq2_m.49437	0.351147	0.346144	0.0192912	0.0404164	0.0551771	0.0345821	372	346	718
comp2273628_c0_seq6_m.75728	-0.349408	-0.361695	0.0189139	0.0402359	0.0544203	0.0347826	370	348	718
comp2274517_c0_seq1_m.77807	0.251889	0.249928	0.0129497	0.0524417	0.0430576	0.0507614	320	398	718
comp2271419_c1_seq1_m.71009	0.561425	0.511408	0.0334817	0.0319699	0.0818955	0.0171233	435	284	719
comp2234282_c0_seq1_m.24908	0.299973	0.292796	0.0168417	0.0468167	0.0517907	0.0395778	345	374	719
comp2274413_c0_seq1_m.77564	0.489032	0.517888	0.0275302	0.0334211	0.0709251	0.0196721	413	307	720
comp2268892_c0_seq1_m.66381	-0.479318	-0.509857	0.0248126	0.032609	0.0653481	0.0202703	404	316	720
comp2211270_c0_seq1_m.14951	0.378021	0.368329	0.0220731	0.0392566	0.0596833	0.0265487	392	330	722
comp2275358_c0_seq1_m.79627	-0.259814	-0.263451	0.0156337	0.0544615	0.0496544	0.0497512	335	390	725
comp2273576_c0_seq1_m.75622	0.330853	0.324149	0.0182488	0.0421692	0.0533426	0.0366197	363	363	726
comp2279235_c0_seq1_m.91078	-0.333597	-0.336167	0.0177371	0.0412472	0.0525118	0.037037	359	367	726
comp2265897_c0_seq5_m.61166	0.23365	0.231684	0.0136277	0.055937	0.0447527	0.0541872	324	405	729
comp2269793_c0_seq1_m.68039	0.264364	0.260508	0.0159592	0.0540047	0.0499352	0.0498753	339	391	730
comp2274446_c0_seq19_m.77642	-0.229983	-0.22845	0.0144747	0.0573346	0.047098	0.0562347	327	408	735
comp2265328_c0_seq2_m.60206	-0.273589	-0.273042	0.0158585	0.0521682	0.0499352	0.0508906	337	399	736
comp2201786_c0_seq1_m.13247	0.613252	0.554289	0.0361227	0.0311598	0.0855977	0.0176056	446	292	738
comp2273216_c0_seq3_m.74900	0.206015	0.205568	0.0147921	0.0595385	0.0479385	0.0574163	329	410	739
comp2256216_c0_seq9_m.46312	0.403054	0.394037	0.0250955	0.0382406	0.0657811	0.027027	405	336	741
gnl_Pdu_trscr_assembly_1_7964_m.49648	0.274199	0.271266	0.0158892	0.0519004	0.0499352	0.0511509	341	401	742
comp2263691_c0_seq2_m.57661	-0.316655	-0.322485	0.0189243	0.0461645	0.0544203	0.0397878	369	376	745
comp2262185_c0_seq1_m.55318	0.812747	0.717928	0.0425388	0.0275338	0.095488	0.015444	474	275	749
comp2266439_c0_seq1_m.62025	0.34933	0.337216	0.0215451	0.0422594	0.0590823	0.0365169	388	362	750
comp1961272_c0_seq1_m.3584	0.410691	0.39057	0.028937	0.0393468	0.0729597	0.0264706	422	329	751
comp2271425_c0_seq4_m.71034	-0.20483	-0.204362	0.0154356	0.0609389	0.0491722	0.0595238	331	420	751
comp2273249_c0_seq4_m.74967	-0.351166	-0.365197	0.0220194	0.0424398	0.0596833	0.0363128	393	360	753
comp2235922_c0_seq1_m.25983	-0.296987	-0.299869	0.018604	0.0503167	0.0537899	0.0493506	368	388	756
comp2254376_c0_seq1_m.43911	0.281501	0.28505	0.0183686	0.0533628	0.0534406	0.0501253	365	393	758
comp2265464_c0_seq1_m.60472	-0.407372	-0.418604	0.0284806	0.0395254	0.0719795	0.0293255	419	342	761
comp2272182_c0_seq2_m.72649	0.337235	0.333769	0.0217399	0.0445761	0.0594633	0.0379404	389	372	761
comp2276166_c0_seq8_m.81705	0.398685	0.38006	0.0277201	0.0403261	0.0711357	0.0346821	415	347	762
comp2270119_c0_seq15_m.68605	0.254902	0.255507	0.0177602	0.0571551	0.0525118	0.0563725	353	409	762
comp2276719_c0_seq5_m.83124	-0.366915	-0.354363	0.0261449	0.0434521	0.0678493	0.0357143	410	354	764
comp2278485_c0_seq1_m.89371	0.362652	0.351428	0.0240425	0.0420789	0.0638039	0.0367232	400	364	764
comp2272495_c0_seq1_m.73308	0.440093	0.412054	0.029435	0.0372989	0.0736913	0.0273556	425	340	765
comp2278470_c0_seq2_m.89275	0.568781	0.610404	0.0374093	0.0329699	0.0874802	0.02	455	312	767
comp2272319_c0_seq24_m.72950	0.231174	0.2289	0.0168072	0.0608487	0.0517907	0.0596659	346	421	767
comp2276040_c1_seq5_m.81315	0.244505	0.242769	0.0173445	0.0589117	0.0525118	0.0581114	356	415	771
comp2279615_c0_seq1_m.91158	-0.207355	-0.206731	0.0166807	0.0636118	0.0515938	0.0629371	344	427	771
comp2257282_c0_seq1_m.47769	-0.248969	-0.245743	0.0181201	0.0590019	0.0532591	0.057971	362	414	776
comp2277352_c0_seq3_m.84974	0.183857	0.183909	0.0182203	0.0590921	0.0533426	0.0578313	364	413	777
comp2276202_c0_seq3_m.81780	0.3452	0.331588	0.0242833	0.045984	0.0642722	0.04	402	378	780
comp2231610_c0_seq1_m.23229	0.25238	0.249718	0.0185388	0.0583684	0.0537475	0.0582524	367	416	783
comp2266005_c0_seq5_m.61322	0.503558	0.47236	0.0381888	0.0365385	0.0889123	0.0245399	457	328	785
comp2270472_c0_seq1_m.69272	0.228744	0.227572	0.0172807	0.061891	0.0525118	0.063981	354	435	789
comp2269023_c0_seq1_m.66650	0.202099	0.202456	0.0172344	0.0655338	0.0525118	0.0643678	352	438	790
comp2278062_c0_seq4_m.87412	0.245046	0.241172	0.0194264	0.0611165	0.0552666	0.0593824	374	419	793
comp2278238_c0_seq6_m.88188	0.259893	0.254693	0.0207539	0.05936	0.0576558	0.057554	383	411	794
comp2276936_c0_seq3_m.83786	0.306337	0.311017	0.0251007	0.0545517	0.0657811	0.0496278	406	389	795
comp2275759_c0_seq17_m.80560	-0.183459	-0.18334	0.0193597	0.0650714	0.0552244	0.062212	373	422	795
comp2278076_c0_seq2_m.87463	0.285003	0.285504	0.0222479	0.0561194	0.0598194	0.0540541	395	404	799
comp2274259_c0_seq1_m.77220	0.337986	0.328207	0.0277456	0.0505047	0.0711357	0.0492228	414	387	801
comp2273385_c0_seq1_m.75218	0.318642	0.309266	0.0258873	0.0529803	0.067345	0.0502513	409	394	803
comp1335339_c0_seq2_m.1954	0.236527	0.234927	0.0189951	0.0625244	0.0544764	0.0636792	371	432	803
comp2265255_c2_seq1_m.60100	0.420011	0.437824	0.0356474	0.0426269	0.0852332	0.0362117	445	359	804
gnl_Pdu_trscr_assembly_1_1213_m.70099	-0.239255	-0.237497	0.0205313	0.0637895	0.0573053	0.0627907	382	426	808
comp2275266_c0_seq21_m.79421	-0.241772	-0.245164	0.0214808	0.0649812	0.0590584	0.0623557	387	423	810
comp2269171_c0_seq3_m.66933	0.396475	0.376634	0.0341794	0.0446664	0.0824647	0.0378378	440	371	811
comp2279213_c0_seq1_m.91075	-0.242573	-0.240446	0.0205739	0.0629746	0.0573053	0.0635294	381	431	812
comp2277722_c0_seq17_m.86189	-0.245065	-0.248415	0.0204002	0.0621579	0.0571206	0.0638298	380	433	813
comp2276442_c0_seq1_m.82386	-0.214672	-0.216579	0.0196832	0.0684436	0.0558477	0.0681818	375	440	815
comp2275508_c1_seq3_m.80009	-0.431889	-0.462819	0.0359801	0.041157	0.0855977	0.0371429	450	368	818
comp2214888_c0_seq1_m.16124	0.21451	0.213884	0.0200094	0.0689878	0.056472	0.0699774	377	442	819
comp2276031_c0_seq51_m.81296	0.39121	0.372044	0.0339546	0.0457961	0.0824647	0.040107	441	379	820
comp2272961_c0_seq1_m.74370	0.220293	0.21791	0.0202475	0.0677857	0.0569769	0.0683371	379	441	820
comp2257975_c0_seq1_m.48752	0.213497	0.214042	0.0209985	0.0712152	0.0580323	0.0738255	385	444	829
gnl_Pdu_trscr_assembly_1_1797_m.38383	0.240262	0.236198	0.0223198	0.0660959	0.0598194	0.0642202	396	437	833
comp2265589_c0_seq2_m.60673	-0.222997	-0.220098	0.0218045	0.0700103	0.0594871	0.0741573	390	446	836
comp1226347_c0_seq1_m.1231	0.191621	0.191488	0.0213675	0.0749934	0.0588989	0.0809628	386	454	840
comp2139380_c0_seq1_m.6935	0.360848	0.343092	0.0348165	0.0518102	0.0836224	0.0512821	443	402	845
comp1234630_c0_seq1_m.1254	-0.27137	-0.267263	0.028433	0.0635216	0.0719795	0.0630841	417	428	845
comp2271649_c0_seq1_m.71599	-0.307198	-0.320066	0.0329288	0.0592697	0.0807286	0.0576923	434	412	846
comp2277740_c0_seq2_m.86258	-0.302257	-0.290769	0.030656	0.0582782	0.0761128	0.0583942	429	417	846
comp2198016_c0_seq1_m.12499	0.21093	0.210889	0.0219178	0.0734568	0.0596433	0.0816777	391	458	849
comp2274137_c1_seq25_m.76929	-0.490095	-0.439367	0.0488091	0.0419013	0.106281	0.0368272	489	365	854
comp2260058_c0_seq1_m.51934	-0.316648	-0.326693	0.0341123	0.057984	0.0824647	0.0585366	439	418	857
comp2269060_c1_seq1_m.66719	-0.380219	-0.406234	0.0406602	0.0527143	0.0928378	0.0505051	465	396	861
comp2271526_c0_seq3_m.71285	-0.350992	-0.333999	0.0377104	0.0550263	0.087991	0.0544554	456	407	863
comp2277176_c0_seq2_m.84466	0.238686	0.235008	0.027431	0.072531	0.0708413	0.0798226	412	451	863
gnl_Pdu_trscr_assembly_1_9334_m.28552	0.227712	0.231491	0.0253409	0.073547	0.0661702	0.0814978	408	457	865
comp2272698_c0_seq4_m.73763	0.184885	0.184202	0.0240464	0.080484	0.0638039	0.0978723	399	468	867
comp2269773_c0_seq6_m.68002	0.173749	0.173994	0.0253735	0.0789267	0.0661702	0.0948276	407	462	869
tuba_m.92505	0.421166	0.389055	0.0478755	0.0505949	0.104688	0.0490956	487	386	873
comp2256558_c1_seq1_m.46706	-0.298599	-0.308966	0.0365958	0.063157	0.0863369	0.0633803	451	430	881
comp1888169_c0_seq2_m.2479	0.539355	0.481901	0.0617694	0.0439408	0.124005	0.0355191	530	352	882
comp2261603_c1_seq1_m.54400	-0.244632	-0.240975	0.0306883	0.0742566	0.0761128	0.0813187	428	456	884
comp2277243_c1_seq3_m.84671	0.226649	0.222918	0.0283888	0.0777547	0.0719795	0.0952381	420	464	884
comp2277075_c0_seq2_m.84155	0.223019	0.219852	0.0292996	0.0793853	0.0735868	0.0967742	423	465	888
comp2234809_c0_seq1_m.25266	-0.192514	-0.192394	0.0269336	0.0850921	0.0697259	0.10251	411	477	888
comp2245053_c0_seq1_m.33185	0.496244	0.459917	0.0563349	0.0460742	0.116843	0.0398936	513	377	890
comp2278554_c0_seq4_m.90013	-0.252827	-0.259221	0.033657	0.0744323	0.0821355	0.0811404	436	455	891
comp2271244_c0_seq1_m.70676	0.264316	0.267999	0.0354191	0.0720564	0.0848782	0.0755556	444	448	892
comp2232909_c0_seq1_m.24034	0.384305	0.384755	0.0488455	0.0558468	0.106281	0.054321	488	406	894
comp2248254_c1_seq2_m.36433	0.468072	0.422075	0.056089	0.0489276	0.11656	0.0471204	512	383	895
comp2248791_c1_seq1_m.37027	0.250357	0.249974	0.0340924	0.0759408	0.0824647	0.0847826	438	460	898
comp2274541_c0_seq1_m.77862	-0.430316	-0.437881	0.0526956	0.052532	0.111689	0.0506329	502	397	899
comp2264971_c0_seq5_m.59605	0.200868	0.198755	0.0284215	0.0858374	0.0719795	0.104167	418	481	899
comp2258527_c0_seq1_m.49534	0.192405	0.193189	0.0279083	0.0868534	0.0713807	0.105372	416	485	901
comp2258349_c0_seq1_m.49322	-0.284999	-0.296836	0.039625	0.0688976	0.0912575	0.0701357	462	443	905
comp2269915_c0_seq3_m.68230	0.213862	0.210382	0.030872	0.0843684	0.0763902	0.102941	430	479	909
comp2277505_c0_seq1_m.85479	0.184716	0.185239	0.0283709	0.0893383	0.0719795	0.110204	421	491	912
isotig10568_m.92324	-0.439887	-0.480212	0.0584016	0.0538224	0.119206	0.05	522	392	914
comp2267718_c0_seq1_m.64309	0.20789	0.208285	0.0316707	0.0874991	0.0780036	0.104723	432	482	914
comp2257601_c0_seq2_m.48241	-0.204326	-0.20294	0.0300373	0.0865761	0.074847	0.105809	427	487	914
comp2274096_c1_seq4_m.76855	0.332475	0.312688	0.0490715	0.0640564	0.106338	0.062645	491	425	916
comp1769718_c0_seq1_m.2239	0.334245	0.343362	0.050163	0.0646034	0.108043	0.0625	494	424	918
gnl_Pdu_trscr_assembly_1_19681_m.92605	0.281385	0.269529	0.0413662	0.0717782	0.0935058	0.0758929	471	450	921
comp2278605_c1_seq8_m.90480	0.253657	0.255567	0.0385415	0.0783722	0.0895374	0.0950324	458	463	921
comp2275153_c0_seq1_m.79199	0.190579	0.189297	0.0298841	0.091532	0.0746401	0.11336	426	495	921
comp2271994_c0_seq2_m.72269	-0.236514	-0.241119	0.0369732	0.0829944	0.086842	0.101053	453	473	926
comp2264621_c0_seq1_m.59138	-0.324074	-0.328522	0.0498509	0.0665583	0.107589	0.0639269	493	434	927
comp2264796_c2_seq1_m.59361	-0.225969	-0.22189	0.0360693	0.0859276	0.0855977	0.10395	448	480	928
comp2260519_c0_seq10_m.52611	-0.249577	-0.245571	0.0393006	0.0800404	0.0907068	0.0985011	461	471	932
comp2278405_c0_seq22_m.88893	0.249467	0.25751	0.039213	0.0798628	0.0907015	0.0987124	460	472	932
comp2275167_c0_seq1_m.79227	0.191419	0.192345	0.0327361	0.0965066	0.0804416	0.124	433	499	932
comp2260971_c0_seq1_m.53490	0.30437	0.295135	0.0479162	0.0698224	0.104688	0.0743243	486	447	933
comp2271783_c0_seq2_m.71842	-0.180627	-0.180877	0.0314605	0.0974586	0.0776659	0.125498	431	502	933
comp2258014_c0_seq1_m.48797	-0.305417	-0.305169	0.0489755	0.0701006	0.106338	0.073991	490	445	935
comp2263768_c0_seq2_m.57843	-0.269584	-0.280747	0.0437145	0.0773759	0.0975098	0.0932755	477	461	938
comp2274888_c0_seq2_m.78557	0.253373	0.254169	0.0409212	0.0801306	0.0930345	0.0982906	468	470	938
comp2262638_c0_seq1_m.56073	-0.193824	-0.195419	0.0337569	0.0975489	0.0821907	0.125249	437	501	938
comp2274713_c1_seq7_m.78178	0.238244	0.236372	0.040905	0.0851823	0.0930345	0.102296	467	476	943
comp2256252_c0_seq1_m.46348	0.605068	0.707128	0.0780268	0.0467265	0.14565	0.0396825	570	375	945
comp2187328_c0_seq1_m.10936	0.262954	0.254323	0.0457175	0.0808487	0.10092	0.0974576	482	466	948
comp2231997_c0_seq1_m.23466	0.209666	0.206244	0.0367775	0.0939549	0.0865735	0.114688	452	496	948
comp2266882_c0_seq1_m.62832	0.295314	0.286674	0.0514834	0.0750836	0.110218	0.080786	497	453	950
comp2272641_c0_seq2_m.73619	0.172475	0.172659	0.0346414	0.103344	0.0833903	0.144814	442	512	954
comp2277388_c0_seq8_m.85093	-0.369462	-0.392513	0.0607908	0.0632472	0.122968	0.0632319	526	429	955
comp2143411_c0_seq1_m.7656	-0.300771	-0.315204	0.0538462	0.0751739	0.113675	0.08061	504	452	956
comp2142866_c0_seq1_m.7576	0.303112	0.286867	0.0522007	0.0733665	0.111083	0.0818584	499	459	958
comp2278362_c0_seq1_m.88712	-0.199338	-0.202423	0.0373897	0.0991325	0.0874802	0.132937	454	505	959
comp2268336_c0_seq2_m.65472	-0.173162	-0.171975	0.036202	0.104898	0.0855977	0.144788	449	511	960
comp2237757_c0_seq1_m.27251	0.177034	0.17645	0.0359062	0.10427	0.0855977	0.145914	447	517	964
comp2278161_c0_seq3_m.87805	0.203147	0.199779	0.0400175	0.100436	0.0919625	0.134387	463	508	971
comp2274483_c0_seq20_m.77737	0.284591	0.272436	0.0548742	0.0803064	0.115388	0.098081	505	469	974
comp2278308_c1_seq12_m.88483	0.188095	0.190368	0.0386351	0.104631	0.0895594	0.145349	459	515	974
comp2272491_c1_seq4_m.73302	-0.202009	-0.205509	0.0415203	0.102594	0.0935965	0.143418	472	509	981
comp2254418_c0_seq1_m.43945	-0.196375	-0.196963	0.0422156	0.104989	0.0949627	0.144509	473	510	983
comp2248291_c0_seq1_m.36455	-0.194441	-0.194257	0.0413921	0.104808	0.0935058	0.145068	470	513	983
comp2262197_c0_seq1_m.55346	0.338129	0.314251	0.0642707	0.0719662	0.127821	0.0757238	535	449	984
comp2258806_c0_seq1_m.49958	0.36473	0.335933	0.0689507	0.0685338	0.13412	0.0680272	547	439	986
comp2262740_c0_seq13_m.56232	0.17838	0.180306	0.0406316	0.110859	0.0928378	0.151052	464	523	987
comp2277956_c0_seq3_m.87021	0.169871	0.168834	0.0405115	0.112647	0.0928378	0.155894	466	527	993
comp2265462_c0_seq5_m.60462	-0.203872	-0.207366	0.0430789	0.103628	0.0964967	0.146484	475	519	994
comp2278012_c0_seq11_m.87235	0.166729	0.166659	0.0411106	0.114746	0.0932659	0.156604	469	531	1000
comp2252912_c0_seq2_m.41849	0.168978	0.169136	0.0439363	0.11806	0.0977996	0.159555	478	542	1020
comp2275905_c0_seq4_m.80965	-0.170219	-0.168636	0.0435557	0.117142	0.0973598	0.160149	476	546	1022
comp2245687_c1_seq1_m.33822	0.459534	0.419214	0.0943779	0.066468	0.167923	0.0640732	598	436	1034
comp2264121_c0_seq1_m.58459	0.418562	0.364541	0.112064	0.0806617	0.191698	0.0976645	622	467	1089

## Sheet: IM_NM vs PM_NM_Male
	limma.logFC	rots.logFC	limma.pvalue	rots.pvalue	limma.adj.pvalue	rots.adj.pvalue	limma.rank	rots.rank	rank.sum
comp2229729_c0_seq1_m.22264	0.986611	0.985669	1.38e-06	9.02256e-05	0.00146506	0	1	1	2
comp1244797_c0_seq1_m.1278	0.431815	0.432074	0.000127505	0.00209117	0.00895142	0	2	2	4
comp2232909_c0_seq1_m.24034	1.45118	1.46019	0.000115835	0.000270677	0.00895142	0	3	3	6
comp2252285_c0_seq2_m.41107	-0.457545	-0.458357	0.000112241	0.00191071	0.00895142	0	4	4	8
comp2254520_c0_seq1_m.44059	-0.62165	-0.621356	0.000124736	0.00164004	0.00895142	0	5	5	10
comp2257395_c0_seq4_m.47951	1.26106	1.27837	5.07e-05	0.000180451	0.00895142	0	6	6	12
comp2263115_c0_seq2_m.56831	0.662213	0.666961	0.000118966	0.00136936	0.00895142	0	7	7	14
comp2264838_c0_seq3_m.59436	-1.37023	-1.38782	0.000134608	0.000360902	0.00895142	0	8	8	16
comp2266507_c0_seq10_m.62138	-0.660684	-0.660647	2.29e-05	0.000451128	0.00895142	0	9	9	18
comp2267732_c0_seq2_m.64331	-0.632913	-0.63458	2.83e-05	0.000631579	0.00895142	0	10	10	20
comp2269185_c0_seq2_m.66963	-0.564789	-0.567412	9.95e-05	0.00154981	0.00895142	0	11	11	22
comp2271737_c1_seq2_m.71770	-0.725924	-0.720763	6.17e-05	0.000901316	0.00895142	0	12	12	24
comp2274295_c0_seq2_m.77311	0.617197	0.620773	9.03e-05	0.00127914	0.00895142	0	13	13	26
comp2277947_c0_seq1_m.86990	-0.463648	-0.462769	0.000128236	0.00236184	0.00895142	0	14	14	28
gnl_Pdu_trscr_assembly_1_16296_m.13041	-0.649054	-0.65282	7.39e-05	0.00109868	0.00895142	0	15	15	30
gnl_Pdu_trscr_assembly_1_998_m.15062	-0.634874	-0.633046	7.26e-05	0.00118891	0.00895142	0	16	16	32
comp2257905_c0_seq1_m.48664	-0.692163	-0.695433	0.000159887	0.00145959	0.0091032	0	17	17	34
comp2273926_c0_seq5_m.76421	1.2428	1.25604	0.000152545	0.000541353	0.0091032	0	18	18	36
comp2277416_c0_seq3_m.85174	0.638998	0.634181	0.000162557	0.00173026	0.0091032	0	19	19	38
comp2237468_c0_seq1_m.27022	-1.34251	-1.35691	0.000215982	0.000721805	0.010079	0	20	20	40
comp2269321_c1_seq1_m.67212	-0.546775	-0.54829	0.000225411	0.00272274	0.010079	0	21	21	42
comp2271526_c0_seq3_m.71285	-0.585468	-0.58322	0.000236819	0.00254229	0.010079	0	22	22	44
comp2279567_c0_seq1_m.91146	0.674107	0.667789	0.000199382	0.00182049	0.010079	0	23	23	46
gnl_Pdu_trscr_assembly_1_3048_m.12984	0.526028	0.525172	0.000234121	0.00299342	0.010079	0	24	24	48
gnl_Pdu_trscr_assembly_1_7327_m.81715	-0.644216	-0.640873	0.000211845	0.00227162	0.010079	0	25	25	50
comp2270279_c0_seq7_m.68904	-0.51237	-0.510328	0.000269741	0.0033515	0.0110386	0	26	26	52
comp2269158_c0_seq1_m.66914	0.445687	0.444578	0.000290923	0.00380263	0.0114645	0	27	27	54
comp1958245_c0_seq1_m.3536	-0.38189	-0.382399	0.000327502	0.00407331	0.0116148	0	28	28	56
comp2276936_c0_seq3_m.83786	0.477551	0.474691	0.000316321	0.00371241	0.0116148	0	29	29	58
comp2277680_c0_seq25_m.86056	-0.392094	-0.392123	0.000338402	0.00461278	0.0116148	0	30	30	60
comp2287273_c0_seq1_contamination_m.91384	0.414891	0.414664	0.000322473	0.00398308	0.0116148	0	31	31	62
comp2189372_c0_seq1_m.11219	-0.512655	-0.509482	0.00054062	0.00479323	0.0120897	0	32	32	64
comp2204754_c0_seq1_m.13720	0.59889	0.591491	0.000483197	0.00353195	0.0120897	0	33	33	66
comp2247988_c0_seq1_m.36173	-0.608969	-0.608307	0.000400096	0.00326128	0.0120897	0	34	34	68
comp2248821_c1_seq2_m.37050	-0.424232	-0.42531	0.000390499	0.00497368	0.0120897	0	35	35	70
comp2249005_c0_seq2_m.37257	0.390921	0.391115	0.000524012	0.00670489	0.0120897	0	36	36	72
comp2253856_c0_seq1_m.43254	-0.459703	-0.461981	0.000475223	0.00517105	0.0120897	0	37	37	74
comp2254675_c0_seq1_m.44244	-0.375166	-0.37555	0.000438111	0.00607331	0.0120897	0	38	38	76
comp2259221_c0_seq1_m.50687	0.425187	0.42324	0.000466925	0.00580263	0.0120897	0	39	39	78
comp2264022_c0_seq13_m.58310	0.549193	0.543568	0.000540558	0.00416353	0.0120897	0	40	40	80
comp2269627_c0_seq2_m.67749	0.483594	0.487058	0.000457481	0.00470301	0.0120897	0	41	41	82
comp2270876_c0_seq2_m.70018	-0.473638	-0.477348	0.000509397	0.0053515	0.0120897	0	42	42	84
comp2272547_c0_seq4_m.73421	-0.431333	-0.433734	0.000500513	0.00625376	0.0120897	0	43	43	86
comp2275241_c0_seq5_m.79383	0.460079	0.460685	0.000476067	0.00526128	0.0120897	0	44	44	88
comp2275893_c0_seq1_m.80933	-0.873438	-0.876949	0.000449209	0.00200094	0.0120897	0	45	45	90
comp2276035_c1_seq16_m.81307	-0.620399	-0.618075	0.000545399	0.00362218	0.0120897	0	46	46	92
comp2278366_c0_seq5_m.88731	-0.442199	-0.442377	0.000474639	0.00544173	0.0120897	0	47	47	94
gnl_Pdu_trscr_assembly_1_14638_m.60097	-0.633208	-0.638913	0.000418938	0.00308365	0.0120897	0	48	48	96
comp2279213_c0_seq1_m.91075	-0.36121	-0.361993	0.000562	0.00715602	0.0122034	0	49	49	98
comp2226643_c0_seq1_m.20830	-0.414016	-0.416123	0.000606879	0.00697556	0.0124177	0	50	50	100
comp2268937_c0_seq1_m.66472	0.441685	0.440872	0.000603564	0.00661466	0.0124177	0	51	51	102
gnl_Pdu_trscr_assembly_1_200732_m.91055	-0.764274	-0.761016	0.000599207	0.0029032	0.0124177	0	52	52	104
comp2276389_c1_seq15_m.82250	-0.350332	-0.349411	0.000625424	0.00787782	0.0125557	0	53	53	106
comp2257939_c0_seq1_m.48703	-0.511407	-0.510828	0.000656513	0.00553195	0.0127005	0	54	54	108
comp2275841_c0_seq1_m.80783	-0.587932	-0.58956	0.000645081	0.00389286	0.0127005	0	55	55	110
comp2272691_c0_seq4_m.73750	0.836987	0.855605	0.000717373	0.00281297	0.013391	0	56	56	112
gnl_Pdu_trscr_assembly_1_1514_m.69841	0.594209	0.603324	0.000708306	0.00452256	0.013391	0	57	57	114
comp2254641_c1_seq1_m.44200	-0.376253	-0.378021	0.00073495	0.0085094	0.0134825	0	58	58	116
comp2257633_c0_seq1_m.48279	-0.425356	-0.427191	0.000752442	0.00805827	0.0135695	0	59	59	118
comp1926910_c0_seq1_m.3122	-0.358385	-0.357134	0.000806673	0.00941165	0.014305	0	60	60	120
comp2225664_c0_seq1_m.20382	0.465667	0.466026	0.000903446	0.00778759	0.0147125	0	61	61	122
comp2266701_c0_seq3_m.62512	0.618939	0.628186	0.000912618	0.00488346	0.0147125	0	62	62	124
comp2269850_c0_seq1_m.68122	0.572223	0.580149	0.000906453	0.00571241	0.0147125	0	63	63	126
comp2274278_c0_seq6_m.77267	-0.502795	-0.50639	0.00090425	0.00688534	0.0147125	0	64	64	128
comp2275523_c0_seq29_m.80039	0.565635	0.567146	0.000890791	0.00589286	0.0147125	0	65	65	130
comp2278474_c0_seq1_m.89294	-0.408094	-0.411055	0.00085122	0.00896053	0.0147125	0	66	66	132
comp2208474_c0_seq1_m.14351	-0.556271	-0.547758	0.000938202	0.00634398	0.0147167	0	67	67	134
comp2263346_c1_seq31_m.57192	-0.42232	-0.421821	0.000970099	0.00914098	0.0147167	0	68	68	136
comp2265656_c0_seq3_m.60780	0.502616	0.509583	0.00101612	0.00742669	0.0147167	0	69	69	138
comp2266692_c0_seq1_m.62504	0.578352	0.569115	0.000945175	0.00598308	0.0147167	0	70	70	140
comp2269987_c0_seq2_m.68354	0.50767	0.51324	0.000981974	0.00724624	0.0147167	0	71	71	142
comp2272437_c1_seq1_m.73204	-0.682977	-0.66886	0.00100394	0.00443233	0.0147167	0	72	72	144
comp2279523_c0_seq1_m.91136	-0.425091	-0.427672	0.00103026	0.00932143	0.0147167	0	73	73	146
comp2281676_c0_seq1_m.91255	0.830628	0.823648	0.00102246	0.00344173	0.0147167	0	74	74	148
gnl_Pdu_trscr_assembly_1_15590_m.29311	1.27056	1.29538	0.00103736	0.00218139	0.0147167	0	75	75	150
comp2245014_c0_seq2_m.33157	-0.593717	-0.592373	0.00105946	0.00616353	0.0148324	0	76	76	152
comp2269611_c0_seq1_m.67728	0.472445	0.470721	0.00120633	0.00905075	0.0164556	0	77	77	154
comp2275107_c0_seq4_m.79080	-0.29529	-0.294914	0.00119797	0.0104906	0.0164556	0	78	78	156
comp1198575_c0_seq1_m.1066	-0.402112	-0.399311	0.00124345	0.0100414	0.0165379	0	79	79	158
comp2268340_c1_seq1_m.65478	0.482527	0.477058	0.00123518	0.0088703	0.0165379	0	80	80	160
comp2260103_c0_seq1_m.51994	-0.373777	-0.375492	0.00129477	0.010688	0.0170078	0	81	81	162
comp2278077_c0_seq3_m.87468	0.539104	0.533494	0.00131743	0.00796805	0.0170944	0	82	82	164
comp2261018_c0_seq2_m.53614	-0.404066	-0.40733	0.00135998	0.010312	0.0172264	0	83	83	166
comp2273599_c0_seq7_m.75677	0.363266	0.365905	0.00134514	0.0109586	0.0172264	0	84	84	168
comp1953876_c0_seq1_m.3493	0.536566	0.527169	0.00140954	0.00823872	0.0173577	0	85	85	170
comp2253875_c0_seq1_m.43271	0.517636	0.5144	0.0014356	0.00878008	0.0173577	0	86	86	172
comp2263250_c0_seq1_m.57052	-0.352876	-0.352407	0.00143137	0.0112293	0.0173577	0	87	87	174
comp2274909_c0_seq7_m.78613	1.40225	1.42749	0.00138667	0.00245207	0.0173577	0	88	88	176
comp2257585_c0_seq1_m.48216	0.614314	0.616037	0.00145613	0.00679511	0.0174081	0	89	89	178
comp2224448_c0_seq1_m.19874	-0.353639	-0.35122	0.00159262	0.0115	0.0188283	0	90	90	180
comp2267571_c0_seq4_m.64058	-0.547163	-0.556405	0.00164069	0.00859962	0.0191834	0	91	91	182
comp2203251_c0_seq1_m.13504	0.365766	0.364837	0.00170179	0.0115902	0.0192629	0	92	92	184
comp2270404_c0_seq3_m.69137	-0.606656	-0.610895	0.00169136	0.00769737	0.0192629	0	93	93	186
comp2275391_c0_seq1_m.79711	-0.566048	-0.572651	0.00168561	0.00841917	0.0192629	0	94	94	188
comp2274242_c0_seq2_m.77187	-0.333345	-0.331601	0.00179148	0.0120395	0.0198556	0	95	95	190
comp2274909_c0_seq7_m.78615	1.38998	1.44042	0.00178681	0.00263252	0.0198556	0	96	96	192
comp2198016_c0_seq1_m.12499	0.301892	0.301121	0.00189328	0.0125808	0.0207675	0	97	97	194
comp2267172_c0_seq1_m.63318	0.483115	0.483599	0.00195483	0.0101316	0.0212239	0	98	98	196
comp2276668_c0_seq1_m.83017	-0.569527	-0.582307	0.00201535	0.0092312	0.0216599	0	99	99	198
comp2265768_c0_seq2_m.60943	-0.661994	-0.67352	0.00207318	0.00751692	0.0217648	0	100	100	200
comp2268798_c0_seq2_m.66233	0.460827	0.453197	0.00206455	0.0107782	0.0217648	0	101	101	202
comp2277933_c1_seq7_m.86946	0.29614	0.297514	0.00210693	0.0135733	0.0217648	0	102	102	204
comp2278010_c1_seq9_m.87231	-0.635642	-0.648826	0.00210066	0.0081485	0.0217648	0	103	103	206
comp1197507_c0_seq1_m.1032	-0.28098	-0.28007	0.00216698	0.0140207	0.0220697	0	104	104	208
comp2252847_c0_seq1_m.41763	0.350152	0.348029	0.00217793	0.0124906	0.0220697	0	105	105	210
comp2276577_c0_seq8_m.92288	0.836946	0.860431	0.00222816	0.00562218	0.0222397	0	106	106	212
comp2277908_c1_seq11_m.86865	0.392091	0.390233	0.00223651	0.0119492	0.0222397	0	107	107	214
comp2274787_c0_seq1_m.78332	-0.329385	-0.330778	0.00227095	0.0133026	0.022373	0	108	108	216
comp1335339_c0_seq2_m.1954	0.404257	0.404949	0.00235101	0.011859	0.0225358	0	109	109	218
comp1916779_c0_seq1_m.2944	-0.318157	-0.319464	0.00231315	0.0141983	0.0225358	0	110	110	220
comp2280591_c0_seq1_m.91233	1.01766	0.976863	0.00234624	0.00434211	0.0225358	0	111	111	222
comp1194294_c0_seq1_m.785	0.346049	0.342975	0.00241561	0.0131222	0.0226275	0	112	112	224
comp2259363_c0_seq16_m.50888	0.307141	0.305621	0.00240036	0.0146494	0.0226275	0	113	113	226
comp2277995_c0_seq1_m.87177	0.320244	0.322511	0.00242437	0.0145592	0.0226275	0	114	114	228
comp2268115_c0_seq2_m.65034	-0.466558	-0.4643	0.00252272	0.0111391	0.0228373	0	115	115	230
comp2270220_c0_seq1_m.68776	0.490282	0.484814	0.00253271	0.0108684	0.0228373	0	116	116	232
comp2273141_c0_seq2_m.74737	0.350954	0.354525	0.00253179	0.0133929	0.0228373	0	117	117	234
comp2274413_c0_seq1_m.77564	0.603637	0.613363	0.00251166	0.00950188	0.0228373	0	118	118	236
comp2258609_c0_seq1_m.49647	0.35803	0.357427	0.00256612	0.013032	0.0229441	0	119	119	238
comp2278471_c0_seq8_m.89279	0.323054	0.320349	0.00271476	0.0150987	0.0240709	0	120	120	240
comp2278630_c0_seq8_m.90809	-0.358321	-0.36203	0.00274431	0.0139305	0.0241318	0	121	121	242
comp1199432_c0_seq1_m.1095	-0.413036	-0.413403	0.00293712	0.0123102	0.0246419	0	122	122	244
comp1953077_c0_seq1_m.3483	-0.5597	-0.568844	0.00284969	0.0102218	0.0246419	0	123	123	246
comp2254346_c0_seq1_m.43876	0.873963	0.893105	0.00292445	0.00652444	0.0246419	0	124	124	248
comp2265049_c0_seq3_m.59764	0.789349	0.776285	0.00294128	0.00733647	0.0246419	0	125	125	250
gnl_Pdu_trscr_assembly_1_12794_m.61443	0.768733	0.776226	0.00288324	0.00760714	0.0246419	0	127	126	253
comp2260394_c0_seq1_m.52394	-0.371281	-0.368415	0.00305958	0.0143788	0.0246453	0	128	127	255
comp2266680_c0_seq1_m.62479	-0.37095	-0.370928	0.00303882	0.0142885	0.0246453	0	129	128	257
comp2270576_c0_seq1_m.69463	0.601958	0.584504	0.00298357	0.0098609	0.0246453	0	130	129	259
comp2273257_c0_seq9_m.74986	0.653821	0.631117	0.00310382	0.00959211	0.0246453	0	131	130	261
comp2275674_c1_seq1_m.80370	-0.710398	-0.727148	0.00303239	0.00868985	0.0246453	0	132	131	263
comp2275701_c1_seq1_m.80440	0.746322	0.738304	0.00309137	0.00832895	0.0246453	0	133	132	265
comp2276151_c0_seq3_m.81648	0.387645	0.389179	0.00306271	0.0132124	0.0246453	0	134	133	267
comp2244716_c0_seq1_m.32883	0.429875	0.424638	0.00318552	0.0121297	0.0251067	0	135	134	269
comp2141997_c0_seq1_m.7386	0.991931	0.999483	0.00337168	0.00643421	0.0258091	0	138	135	273
comp2274474_c0_seq5_m.77718	-0.634132	-0.655886	0.00335568	0.00995113	0.0258091	0	139	136	275
comp2262731_c0_seq1_m.56213	0.546151	0.535175	0.00359296	0.0110489	0.0266355	0	142	137	279
comp2269814_c0_seq1_m.68069	0.392402	0.392319	0.00357096	0.014469	0.0266355	0	143	138	281
comp2275191_c0_seq1_m.79281	0.330018	0.326928	0.00285802	0.0153759	0.0246419	0.00641026	126	163	289
comp2264621_c0_seq1_m.59138	-0.487844	-0.499217	0.00431485	0.0122199	0.0300066	0	153	139	292
comp2270905_c1_seq5_m.70069	-0.334534	-0.33264	0.00323711	0.0160977	0.0251408	0.00609756	137	155	292
comp2276805_c0_seq8_m.83380	0.447458	0.45715	0.00439091	0.0134831	0.0303352	0	155	140	295
comp2257674_c0_seq1_m.48339	1.07666	1.07354	0.00463849	0.00706579	0.0311724	0	157	141	298
comp2276804_c0_seq1_m.83376	-0.560609	-0.558453	0.00465018	0.0116805	0.0311724	0	158	142	300
comp2261395_c0_seq1_m.54150	0.773983	0.743763	0.00479133	0.00977068	0.0316645	0	160	143	303
comp2274106_c1_seq2_m.76871	0.611622	0.633038	0.0048721	0.0113195	0.0319995	0	162	144	306
comp2276825_c0_seq1_m.83424	0.369369	0.368245	0.00363207	0.0154662	0.0266519	0.00636943	145	162	307
comp2276426_c0_seq2_m.82339	-0.386437	-0.393144	0.00427169	0.0158271	0.0299018	0.00621118	152	158	310
comp2279536_c0_seq1_m.91140	-0.329933	-0.332583	0.00340088	0.0165555	0.0258467	0.0119048	140	171	311
comp2278333_c0_seq10_m.88591	-0.367656	-0.373533	0.00417341	0.016375	0.0294074	0.0120482	151	173	324
comp2273417_c0_seq5_m.75297	-0.477962	-0.489969	0.00607333	0.014828	0.0349698	0	188	145	333
comp1977957_c0_seq1_m.3878	0.434012	0.436142	0.00554931	0.0156466	0.0336505	0.00628931	175	160	335
comp2347711_c0_seq1_contamination_m.91628	-0.440308	-0.452116	0.00578137	0.0159173	0.0341743	0.00617284	180	157	337
comp2272863_c1_seq5_m.74143	-0.24886	-0.249738	0.00441913	0.022031	0.0303352	0.0140187	154	184	338
comp2271871_c0_seq8_m.72023	0.404697	0.396193	0.00534783	0.0166457	0.0331237	0.0118343	169	170	339
comp2273356_c0_seq1_m.75157	0.251079	0.25226	0.00503139	0.0231137	0.0324448	0.0135135	165	176	341
comp2251806_c0_seq1_m.40480	-0.24092	-0.240901	0.004965	0.0229361	0.032212	0.0135747	164	177	341
comp2273017_c0_seq1_m.74484	-0.267844	-0.268944	0.0044866	0.0219408	0.0306009	0.0140845	156	185	341
comp2238188_c0_seq1_m.27576	-0.568377	-0.546201	0.00667792	0.0126711	0.0362149	0	196	146	342
comp2274748_c1_seq11_m.78259	-0.253743	-0.25428	0.00397337	0.0205752	0.0285681	0.015	147	198	345
comp1910314_c0_seq1_m.2848	-0.412597	-0.41377	0.00624461	0.0173712	0.0349698	0.0114943	184	165	349
comp2277617_c1_seq7_m.85877	-0.297239	-0.298976	0.00465828	0.0212068	0.0311724	0.0144928	159	191	350
comp2275853_c0_seq1_m.80817	0.461756	0.454603	0.00638798	0.0157368	0.0353355	0.00625	192	159	351
comp2275714_c2_seq1_m.80469	-0.299042	-0.295864	0.00490892	0.0213844	0.0320435	0.0144231	163	190	353
gnl_Pdu_trscr_assembly_1_4228_m.63259	-0.522458	-0.541668	0.0075931	0.0150085	0.0390293	0	207	147	354
comp2274581_c1_seq21_m.92631	-0.306685	-0.309874	0.00513637	0.0214746	0.0329223	0.0143541	166	189	355
comp2276413_c0_seq21_m.82313	-0.299252	-0.301127	0.0040006	0.0194774	0.0285681	0.0157068	148	207	355
comp2272233_c0_seq1_m.72760	-0.289446	-0.290207	0.0036048	0.0190197	0.0266355	0.0160428	144	211	355
comp2265897_c0_seq5_m.61166	0.287436	0.285444	0.00350583	0.0187491	0.0264553	0.0163043	141	214	355
comp2263394_c0_seq1_m.57263	0.576623	0.575062	0.00778144	0.0137528	0.0397666	0	209	148	357
comp2250201_c0_seq1_m.38525	0.278138	0.278522	0.00323073	0.0181024	0.0251408	0.0168539	136	221	357
comp2256041_c0_seq1_m.46046	0.436658	0.44177	0.0062363	0.0164652	0.0349698	0.011976	186	172	358
comp2249227_c0_seq1_m.37479	-0.304121	-0.306536	0.00403692	0.0193872	0.0286352	0.0157895	150	208	358
gnl_Pdu_trscr_assembly_1_14069_m.67140	-0.306939	-0.303973	0.00399619	0.019297	0.0285681	0.015873	149	209	358
comp2261876_c0_seq1_m.54865	0.477973	0.493659	0.00684793	0.0155564	0.0366141	0.00632911	198	161	359
comp2278480_c0_seq4_m.89330	0.428257	0.433061	0.00640954	0.0171034	0.0353355	0.0116279	193	167	360
gnl_Pdu_trscr_assembly_1_16681_m.81096	0.213321	0.21352	0.00535434	0.0215648	0.0331237	0.0142857	172	188	360
comp2268869_c0_seq6_m.66344	0.792689	0.843187	0.00797772	0.0114098	0.0397725	0	212	149	361
comp2271425_c0_seq4_m.71034	-0.211495	-0.211527	0.00588173	0.0227556	0.0342759	0.0136986	183	179	362
comp2261716_c0_seq2_m.54597	0.324491	0.328466	0.00525362	0.0208459	0.0331237	0.0147783	168	195	363
comp1194322_c0_seq2_m.793	0.309492	0.307857	0.00380689	0.0183731	0.0277434	0.0165746	146	217	363
comp2252059_c0_seq1_m.40786	0.313437	0.30929	0.00619244	0.0223083	0.0349698	0.0138889	185	182	367
comp2242282_c0_seq1_m.30761	-0.331356	-0.336115	0.00559787	0.0211165	0.0336505	0.0145631	176	192	368
comp2236614_c0_seq1_m.26450	0.450089	0.459907	0.00651132	0.0162848	0.0355284	0.0121212	195	174	369
comp2277163_c0_seq1_m.84431	-0.30638	-0.305939	0.00620157	0.022578	0.0349698	0.0137615	190	180	370
comp2272087_c2_seq11_m.72459	0.3349	0.338936	0.00543699	0.0203929	0.0332607	0.0150754	174	199	373
comp2274693_c0_seq1_m.78142	0.344743	0.341443	0.0047802	0.0189295	0.0316645	0.016129	161	212	373
comp2277114_c1_seq1_m.84278	0.666801	0.704135	0.00945304	0.0127613	0.0437306	0	230	150	380
comp2272433_c0_seq1_m.73197	0.341787	0.340539	0.00681807	0.0221212	0.0366141	0.0139535	199	183	382
comp1194290_c0_seq1_m.781	-0.671685	-0.635706	0.0096219	0.0128515	0.0439386	0	233	151	384
comp2273249_c0_seq4_m.74967	-0.479753	-0.490785	0.0082998	0.017281	0.0401935	0.0115607	219	166	385
comp2271916_c0_seq1_m.72122	0.364399	0.361252	0.00532212	0.0186588	0.0331237	0.0163934	170	215	385
comp2271413_c1_seq5_m.70995	-0.363765	-0.365049	0.00622528	0.020032	0.0349698	0.0153846	187	203	390
comp2257070_c0_seq2_m.47513	0.359569	0.356894	0.00631747	0.0203026	0.0351926	0.0151515	191	200	391
gnl_Pdu_trscr_assembly_1_2589_m.58494	-0.3691	-0.37549	0.0069927	0.0210263	0.0370161	0.0146341	201	193	394
comp2223962_c0_seq7_m.19686	-0.374221	-0.38029	0.00784868	0.0216551	0.0397666	0.014218	208	187	395
comp2257070_c0_seq2_m.47512	0.592716	0.618325	0.0108244	0.0160075	0.047358	0.00613497	240	156	396
comp2214845_c0_seq1_m.16111	0.376803	0.368993	0.00725542	0.0209361	0.037842	0.0147059	204	194	398
comp2257601_c0_seq2_m.48241	-0.237769	-0.238043	0.00556805	0.025141	0.0336505	0.0168776	177	222	399
comp2212572_c0_seq1_m.15390	0.248328	0.246962	0.00528581	0.024031	0.0331237	0.0173913	167	232	399
comp2277505_c0_seq1_m.85479	0.241238	0.24168	0.00535458	0.0243008	0.0331237	0.0172414	171	230	401
comp2275445_c0_seq2_m.79869	-0.381247	-0.381019	0.00670519	0.0197547	0.0362149	0.015544	197	205	402
comp2270828_c0_seq11_m.69939	-0.359737	-0.367664	0.00864813	0.0224878	0.0412628	0.0138249	223	181	404
comp2279340_c0_seq1_m.91103	0.536632	0.557091	0.00991939	0.0168252	0.0447213	0.0117647	236	169	405
comp2269009_c0_seq1_m.66627	-0.390037	-0.39338	0.00781482	0.0207556	0.0397666	0.0148515	210	196	406
comp2278405_c0_seq22_m.88893	0.266483	0.268683	0.0057759	0.0245789	0.0341743	0.017094	179	227	406
comp2250982_c0_seq1_m.39507	0.225893	0.225409	0.00543925	0.0239408	0.0332607	0.0174672	173	233	406
comp2276440_c0_seq2_m.82383	0.266956	0.269075	0.00571445	0.024391	0.0341583	0.0171674	178	229	407
comp2276491_c0_seq8_m.82522	-0.21251	-0.212134	0.00619546	0.0250508	0.0349698	0.0169492	189	223	412
comp2201786_c0_seq1_m.13247	0.811263	0.750613	0.0128857	0.0129417	0.0525302	0	261	152	413
comp2262281_c0_seq3_m.55504	0.281898	0.284532	0.00584638	0.0235818	0.0342759	0.0176991	182	236	418
gnl_Pdu_trscr_assembly_1_7274_m.39240	0.907584	0.91389	0.0131204	0.0124004	0.0525492	0	266	153	419
comp2278623_c0_seq6_m.90693	0.413016	0.418939	0.00791729	0.0196645	0.0397725	0.015625	214	206	420
comp2204672_c0_seq1_m.13711	-0.239663	-0.24082	0.0058952	0.0260771	0.0342759	0.0206612	181	242	423
comp2260058_c0_seq1_m.51934	-0.421301	-0.430141	0.0125691	0.0232039	0.0520372	0.0134529	254	175	429
comp2271567_c0_seq1_m.71391	0.427519	0.433501	0.00922911	0.0202124	0.0431983	0.0152284	228	201	429
comp2275358_c0_seq1_m.79627	-0.298571	-0.302412	0.0064516	0.023672	0.035384	0.0176211	194	235	429
comp2269201_c0_seq1_m.67004	-0.767515	-0.805611	0.0142767	0.0149182	0.0552315	0	276	154	430
comp2138952_c0_seq1_m.6867	0.441115	0.431111	0.0073256	0.0176485	0.0380217	0.0170455	205	226	431
gnl_Pdu_trscr_assembly_1_200732_m.91056	-0.623588	-0.584037	0.0129503	0.0169154	0.0525311	0.0116959	264	168	432
comp2272118_c0_seq11_m.72524	0.446365	0.459463	0.00803325	0.0181927	0.0397725	0.0167598	213	219	432
comp2143334_c0_seq2_m.7649	0.450531	0.455277	0.0083705	0.0182829	0.0402508	0.0166667	221	218	439
comp2264302_c0_seq2_m.58699	-0.459675	-0.47277	0.00882424	0.0184633	0.0419151	0.0164835	224	216	440
gnl_Pdu_trscr_assembly_1_11607_m.26425	0.459142	0.447315	0.0106101	0.0201222	0.0473101	0.0153061	239	202	441
comp2271595_c0_seq2_m.71452	0.292589	0.294292	0.00695164	0.0254286	0.0369827	0.0209205	200	245	445
comp2263508_c0_seq1_m.57408	0.471017	0.472895	0.0129976	0.0218506	0.0525311	0.0141509	262	186	448
comp2252746_c0_seq1_m.41651	-0.330484	-0.332494	0.00819798	0.0241212	0.0400122	0.017316	218	231	449
comp2279615_c0_seq1_m.91158	-0.223226	-0.222724	0.00714815	0.0288938	0.0376516	0.0226415	202	248	450
comp2276442_c0_seq1_m.82386	-0.246507	-0.248457	0.00741331	0.028984	0.0382901	0.0225564	206	247	453
gnl_Pdu_trscr_assembly_1_16061_m.43221	-0.342361	-0.347206	0.00831069	0.0234013	0.0401935	0.0178571	220	238	458
comp1194106_c0_seq1_m.742	0.234259	0.233194	0.00793159	0.030734	0.0397725	0.0232975	211	256	467
comp2269580_c0_seq1_m.67656	0.269555	0.266345	0.00839819	0.0290742	0.0402508	0.0224719	222	246	468
comp2269110_c0_seq3_m.66810	-0.282234	-0.278859	0.00807978	0.0279906	0.0398004	0.0232558	216	255	471
comp2265370_c0_seq1_m.60276	-0.188739	-0.188703	0.00925679	0.0286156	0.0431983	0.0228137	227	250	477
gnl_Pdu_trscr_assembly_1_17807_m.62055	0.242653	0.242549	0.00803674	0.0299906	0.0397725	0.0236364	215	264	479
comp2271350_c0_seq18_m.70898	0.288385	0.284236	0.00813464	0.0275376	0.039886	0.023622	217	263	480
comp1876805_c0_seq1_m.2339	0.274884	0.272787	0.00718838	0.0269107	0.037677	0.0241935	203	278	481
comp2277374_c0_seq2_m.85051	0.576315	0.572235	0.0137744	0.0188393	0.054081	0.0162162	271	213	484
comp2252790_c0_seq1_m.41691	0.584323	0.569481	0.0126738	0.0175583	0.0520653	0.0171429	258	228	486
comp2205419_c0_seq2_m.13843	-0.30951	-0.312936	0.00989074	0.0283468	0.0447213	0.0229885	235	252	487
comp2274999_c0_seq4_m.78837	0.302452	0.297488	0.0089273	0.0276278	0.0420294	0.0235294	226	261	487
comp2276593_c0_seq3_m.82791	0.36063	0.36229	0.0107389	0.0255188	0.047358	0.0208333	244	244	488
comp2271594_c0_seq8_m.71451	-0.573047	-0.587885	0.0154104	0.0199417	0.0574296	0.0154639	286	204	490
comp2254426_c0_seq1_m.43954	-0.368571	-0.378395	0.01252	0.0265329	0.0520372	0.0204082	253	239	492
comp1196959_c0_seq2_m.1014	0.314341	0.316104	0.00972058	0.027718	0.0441995	0.0234375	234	259	493
comp2256245_c0_seq1_m.46340	-0.313737	-0.319528	0.00956699	0.0274474	0.0438762	0.0237154	232	265	497
gnl_Pdu_trscr_assembly_1_3867_m.65412	1.09267	1.19007	0.0213736	0.0152857	0.0680884	0.00645161	334	164	498
comp2265471_c0_seq5_m.60488	0.281044	0.27683	0.00944028	0.0295423	0.0437306	0.0239852	229	271	500
comp2233700_c1_seq1_m.24550	0.628082	0.652637	0.0145934	0.0180122	0.0555016	0.0169492	279	224	503
comp2273765_c1_seq6_m.76032	0.609515	0.623505	0.0180488	0.0206654	0.0621743	0.0149254	311	197	508
comp2263612_c1_seq1_m.57550	-0.229747	-0.2293	0.00890241	0.0323008	0.0420294	0.0243902	225	283	508
comp2275191_c1_seq2_m.79282	0.349492	0.340489	0.0126253	0.0282566	0.0520653	0.0230769	259	253	512
comp2261183_c0_seq1_m.53867	0.400163	0.399266	0.0137241	0.0259868	0.054081	0.0207469	270	243	513
comp2274137_c1_seq25_m.76929	-0.597081	-0.549327	0.0223143	0.0228459	0.0704524	0.0136364	337	178	515
comp2231610_c0_seq1_m.23229	0.261073	0.257633	0.010627	0.0329323	0.0473101	0.0242215	238	279	517
gnl_Pdu_trscr_assembly_1_18157_m.24773	0.342272	0.334311	0.0111504	0.0271767	0.0480323	0.024	247	272	519
comp2267634_c0_seq2_m.64174	-0.459301	-0.448645	0.0154369	0.0234915	0.0574296	0.0177778	285	237	522
comp2243933_c0_seq1_m.32211	-0.3612	-0.371631	0.0131373	0.0278083	0.0525492	0.0233463	265	257	522
comp2278480_c1_seq1_m.89333	0.268344	0.268466	0.00949922	0.0311081	0.043754	0.025	231	291	522
comp2276498_c2_seq1_m.82546	-0.350193	-0.353236	0.0115907	0.0270009	0.0493299	0.0240964	250	275	525
comp2270385_c0_seq11_m.69105	0.36687	0.355853	0.013034	0.0272669	0.0525311	0.0239044	263	270	533
comp2271381_c1_seq12_m.70942	0.214866	0.213516	0.0110747	0.0366964	0.0479005	0.0254777	246	292	538
comp2275110_c1_seq5_m.79090	-0.207794	-0.207125	0.0108232	0.0364258	0.047358	0.0257235	243	295	538
comp2263983_c0_seq1_m.58208	0.215312	0.214247	0.0107943	0.0360724	0.047358	0.02589	242	297	539
comp2276528_c1_seq4_m.82615	0.75072	0.789555	0.0207077	0.0192068	0.0669789	0.0159574	330	210	540
comp2266841_c0_seq1_m.62766	0.380701	0.370831	0.0159023	0.0288036	0.0580243	0.0227273	291	249	540
comp2260797_c0_seq1_m.53088	-0.200179	-0.199381	0.0108603	0.0358017	0.047358	0.0261438	241	300	541
comp2275822_c0_seq10_m.80745	-0.337491	-0.344392	0.0135205	0.0294521	0.0534789	0.0240741	269	274	543
comp2269023_c0_seq1_m.66650	0.196385	0.196538	0.0110531	0.0359821	0.0479005	0.025974	245	298	543
comp2269593_c0_seq3_m.67692	0.242026	0.240112	0.0104308	0.0341194	0.0468287	0.027027	237	310	547
comp2274301_c0_seq6_m.77327	0.377448	0.36748	0.0133831	0.0268205	0.0531328	0.0242915	268	281	549
comp2278554_c0_seq4_m.90013	-0.300201	-0.307018	0.0143508	0.0333853	0.0552315	0.024055	277	273	550
comp2273778_c1_seq23_m.76059	0.524988	0.549518	0.0207735	0.0249605	0.0669789	0.0170213	327	225	552
comp2273813_c0_seq2_m.76128	0.251344	0.251123	0.0125567	0.0357115	0.0520372	0.0262295	255	301	556
comp2280694_c0_seq1_m.91236	0.550991	0.540817	0.0228223	0.0252312	0.0710026	0.0168067	342	220	562
comp2277722_c0_seq17_m.86189	-0.257399	-0.261098	0.0125343	0.0351626	0.0520372	0.0266667	257	306	563
comp2253077_c0_seq1_m.42045	0.182222	0.182006	0.0115229	0.0336711	0.0492384	0.0273973	249	316	565
comp2268194_c0_seq1_m.65186	-0.329557	-0.334678	0.0146809	0.0314746	0.0555891	0.0248227	281	289	570
comp2275406_c1_seq7_m.79751	0.21989	0.21831	0.0122895	0.039078	0.0518891	0.0275229	252	318	570
comp2246514_c1_seq1_m.34691	-0.277293	-0.278689	0.0128289	0.0340291	0.0524996	0.0271186	260	311	571
comp2265703_c0_seq1_m.60844	-0.382657	-0.39263	0.0180362	0.029813	0.0621743	0.0237226	306	266	572
comp2263691_c0_seq2_m.57661	-0.323994	-0.330295	0.0158016	0.0325658	0.0579755	0.0243056	290	282	572
comp2265885_c0_seq3_m.61143	0.389647	0.396259	0.0181731	0.0296325	0.0621743	0.0238971	307	269	576
comp2271802_c0_seq1_m.71876	-0.212797	-0.213228	0.0113803	0.0372585	0.048825	0.0283912	248	328	576
gnl_Pdu_trscr_assembly_1_7964_m.49648	0.268131	0.264763	0.0139245	0.035343	0.0542699	0.0264901	273	304	577
comp2248291_c0_seq1_m.36455	-0.227397	-0.228245	0.0120787	0.0375357	0.051202	0.0282132	251	326	577
comp2253217_c0_seq2_m.42336	-0.288346	-0.284399	0.0143789	0.03439	0.0552315	0.0267559	275	307	582
comp2276173_c0_seq1_m.81727	0.23511	0.232616	0.0124342	0.0373487	0.0520372	0.0283019	256	327	583
comp2264888_c0_seq4_m.59493	0.524332	0.491711	0.0229201	0.0261673	0.0710992	0.0205761	343	241	584
comp2262197_c0_seq1_m.55346	0.458753	0.434008	0.0215935	0.0285254	0.0684105	0.0229008	335	251	586
comp2279450_c0_seq1_m.91124	0.282935	0.278123	0.0155002	0.0358919	0.057464	0.0260586	287	299	586
comp2261150_c0_seq1_m.53829	0.353063	0.341381	0.0181718	0.0321053	0.0621743	0.0244755	303	285	588
comp2265328_c0_seq2_m.60206	-0.29269	-0.290747	0.0146057	0.0342998	0.0555016	0.0268456	280	308	588
comp2211270_c0_seq1_m.14951	0.401966	0.392113	0.0184131	0.0292716	0.0623934	0.0242537	312	280	592
comp2268978_c0_seq1_m.66540	0.646936	0.705356	0.0261935	0.0238506	0.0774163	0.0175439	359	234	593
comp2272491_c1_seq4_m.73302	-0.249042	-0.252758	0.0139036	0.0379934	0.0542699	0.0278638	272	322	594
comp2271535_c0_seq1_m.71319	0.24899	0.245324	0.0144959	0.0395461	0.0554808	0.027439	278	317	595
comp2278363_c0_seq7_m.88713	-0.249998	-0.252093	0.013192	0.0371682	0.0525705	0.028481	267	329	596
comp1326513_c0_seq1_m.1923	-0.411942	-0.401512	0.0193615	0.0293618	0.0639772	0.0241636	322	277	599
comp2263950_c0_seq2_m.58147	0.431849	0.43127	0.0227652	0.0304568	0.0710026	0.0234657	340	260	600
comp2280482_c0_seq1_m.91228	-0.296395	-0.30332	0.0169185	0.0356212	0.0604068	0.0263158	298	302	600
comp2275625_c0_seq11_m.80264	-0.479968	-0.507628	0.0216033	0.0273571	0.0684105	0.0238095	336	267	603
comp2272782_c0_seq2_m.73955	-0.368762	-0.359312	0.0183265	0.0313844	0.0623934	0.024911	313	290	603
comp2251386_c0_seq2_m.40044	-0.304129	-0.300488	0.0177561	0.035531	0.0621743	0.0264026	302	303	605
comp2277142_c0_seq6_m.84365	0.317946	0.326729	0.0166342	0.0339389	0.059793	0.0272109	296	312	608
comp2250281_c0_seq1_m.38657	-0.184109	-0.183583	0.0141178	0.042812	0.0548223	0.0321637	274	338	612
comp2275933_c0_seq1_m.81045	0.463698	0.47702	0.0255801	0.0306438	0.0762386	0.0233813	357	258	615
comp2271637_c0_seq1_m.71562	0.311651	0.309132	0.0188837	0.0363355	0.0627884	0.0258065	319	296	615
comp2276314_c0_seq1_m.82075	0.480736	0.47035	0.0209096	0.0267303	0.0670116	0.0243902	332	284	616
comp2254568_c0_seq1_m.44123	-0.273375	-0.278329	0.01616	0.0379032	0.0584838	0.0279503	294	323	617
comp2246502_c0_seq1_m.34680	-0.228105	-0.225713	0.015278	0.0432697	0.0572387	0.03207	284	337	621
comp2278509_c0_seq8_m.89637	0.257996	0.262551	0.016049	0.0405827	0.0582803	0.03003	293	333	626
comp2266869_c0_seq1_m.62813	0.231396	0.230491	0.015924	0.044359	0.0580243	0.0317919	292	334	626
comp2277134_c1_seq4_m.84342	0.237859	0.238794	0.0147497	0.0413233	0.0556515	0.0328358	282	345	627
comp2236992_c0_seq1_m.26663	-0.24558	-0.247224	0.015106	0.0407622	0.0567942	0.0329341	283	346	629
comp2269698_c0_seq1_m.67864	0.245599	0.244548	0.0155743	0.0416006	0.0574935	0.0326409	289	343	632
comp2274537_c0_seq28_m.77857	-0.285665	-0.290341	0.0188521	0.0398233	0.0627884	0.0272727	320	313	633
comp2272435_c0_seq2_m.73201	0.725354	0.686155	0.034985	0.0263449	0.0939563	0.0204918	398	240	638
comp2257282_c0_seq1_m.47769	-0.187159	-0.186951	0.0156162	0.0470977	0.0574935	0.033241	288	350	638
comp2266882_c0_seq1_m.62832	0.346847	0.335721	0.0224869	0.0352528	0.0707871	0.0265781	338	305	643
comp2278222_c0_seq3_m.88116	-0.20438	-0.203818	0.0167166	0.0482942	0.0598872	0.032967	297	347	644
comp2271944_c0_seq11_m.72172	0.361535	0.360527	0.0250879	0.0366062	0.07598	0.0255591	352	293	645
comp2278470_c0_seq2_m.89275	0.532198	0.558592	0.0312116	0.0303665	0.086599	0.0235507	385	262	647
comp2269326_c0_seq2_m.67220	-0.216783	-0.218653	0.0164329	0.0465404	0.0592699	0.0334262	295	352	647
comp2269345_c0_seq1_m.67253	0.258575	0.255742	0.0177283	0.0425348	0.0621743	0.0323529	308	340	648
comp1961272_c0_seq1_m.3584	0.454286	0.437656	0.0271868	0.0317519	0.0790349	0.0246479	365	287	652
comp2247821_c0_seq5_m.35979	0.307929	0.304913	0.0209896	0.0388102	0.067066	0.0276923	333	320	653
comp2269793_c0_seq1_m.68039	0.318618	0.320384	0.0204072	0.0369812	0.0666051	0.0285714	326	330	656
comp2265462_c0_seq5_m.60462	-0.238389	-0.242204	0.0180842	0.0458929	0.0621743	0.0338028	305	356	661
comp2262887_c0_seq1_m.56477	0.240309	0.24049	0.0175252	0.0448929	0.062156	0.034384	300	362	662
comp2256252_c0_seq1_m.46348	0.729333	0.816225	0.0381404	0.0281664	0.0982601	0.023166	409	254	663
comp1769718_c0_seq1_m.2239	0.273005	0.267138	0.0198022	0.0427218	0.0650296	0.0322581	324	339	663
gnl_Pdu_trscr_assembly_1_20792_m.71829	0.165102	0.165296	0.0185632	0.0480094	0.0624203	0.0330579	318	348	666
comp2242407_c0_seq1_m.30845	0.496351	0.461694	0.0310093	0.0318421	0.0863714	0.0245614	382	286	668
comp2277075_c0_seq2_m.84155	0.239398	0.236211	0.0183966	0.0462632	0.0623934	0.0336134	314	354	668
comp1888169_c0_seq2_m.2479	0.632188	0.57081	0.037144	0.0297227	0.097774	0.0238095	403	268	671
comp2253516_c0_seq4_m.42708	0.341922	0.329022	0.0262821	0.0397331	0.0774631	0.0273556	361	315	676
comp2237757_c0_seq1_m.27251	0.183508	0.182512	0.017816	0.0506598	0.0621743	0.0377358	301	375	676
comp2262300_c0_seq2_m.55547	0.188965	0.189052	0.0175225	0.050297	0.062156	0.0379404	299	377	676
comp2275266_c0_seq21_m.79421	-0.247395	-0.249978	0.0206394	0.0475536	0.0669789	0.0331492	329	349	678
comp2276743_c0_seq1_m.83169	0.2504	0.248888	0.0195209	0.0457124	0.0643042	0.0339943	323	358	681
comp2269738_c0_seq1_m.67939	-0.188134	-0.188767	0.0181187	0.0510226	0.0621743	0.0375335	309	373	682
comp2265464_c0_seq1_m.60472	-0.421725	-0.432868	0.0278489	0.0338487	0.0803016	0.0273038	369	314	683
comp2262441_c0_seq1_m.55760	-0.211605	-0.212214	0.0180907	0.0491898	0.0621743	0.0382514	304	380	684
comp2271667_c0_seq1_m.71637	0.193661	0.194726	0.0186542	0.0514709	0.0624203	0.0371353	316	369	685
comp2271044_c0_seq1_m.70310	-0.186903	-0.186116	0.0176841	0.050484	0.0621743	0.0378378	310	376	686
comp2258349_c0_seq1_m.49321	-0.174072	-0.173944	0.0186557	0.0511128	0.0624203	0.0374332	315	372	687
comp2278485_c0_seq1_m.89371	0.340428	0.327131	0.0264024	0.0400207	0.0776028	0.0287009	362	332	694
comp2277945_c0_seq2_m.86985	0.558759	0.611323	0.0398569	0.0332951	0.100971	0.0241379	420	276	696
comp2275759_c0_seq17_m.80560	-0.169374	-0.168965	0.0185257	0.0498289	0.0624203	0.0381471	317	379	696
comp2139380_c0_seq1_m.6935	0.380374	0.362171	0.0297518	0.037813	0.0840139	0.0280374	375	324	699
comp2107035_c0_seq2_m.6021	-0.217026	-0.218019	0.0192656	0.0501015	0.0638587	0.0380435	321	378	699
comp2271419_c1_seq1_m.71009	0.58446	0.538368	0.0378512	0.0316617	0.0982601	0.024735	412	288	700
comp2268225_c0_seq5_m.65245	0.476572	0.445296	0.0343494	0.0342096	0.0931718	0.026936	392	309	701
comp2197446_c0_seq1_m.12404	0.228232	0.225806	0.0227007	0.0517415	0.0710026	0.0368421	339	366	705
gi_613484551	0.385354	0.398838	0.0313008	0.0386316	0.086599	0.0277778	386	321	707
comp2273576_c0_seq1_m.75622	0.289088	0.281134	0.0265392	0.0470075	0.0777898	0.0333333	363	351	714
comp2232641_c0_seq7_m.23875	-0.185996	-0.185692	0.0200857	0.0536645	0.0657576	0.0437018	325	389	714
comp2273142_c0_seq1_m.74744	-0.339646	-0.353397	0.028115	0.0415103	0.0806316	0.0327381	371	344	715
comp2237053_c0_seq1_m.26700	0.297249	0.288055	0.0260796	0.0452688	0.0774163	0.0342857	358	361	719
comp2267483_c0_seq3_m.63903	-0.297741	-0.306637	0.0276018	0.0463534	0.0798053	0.0335196	368	353	721
comp2271675_c0_seq2_m.71655	0.429542	0.400977	0.0371857	0.0389878	0.097774	0.0276074	405	319	724
comp2265255_c2_seq1_m.60100	0.358006	0.365034	0.0335442	0.0437331	0.0918203	0.0319767	388	336	724
comp2272920_c0_seq1_m.74280	0.305578	0.306478	0.0283507	0.0461729	0.0810891	0.0337079	372	355	727
comp2271906_c0_seq1_m.72107	0.253752	0.251289	0.0261688	0.051203	0.0774163	0.0373333	360	371	731
comp2268443_c0_seq2_m.65634	0.225009	0.223702	0.0230177	0.052391	0.0711942	0.0417755	344	388	732
comp2275153_c0_seq1_m.79199	0.188935	0.18748	0.0207329	0.0543102	0.0669789	0.0461538	328	404	732
comp2277311_c0_seq3_m.84858	0.374159	0.385683	0.034061	0.0421607	0.0926878	0.0325444	391	342	733
comp2265386_c0_seq2_m.60299	0.184546	0.18319	0.020856	0.0545771	0.0670116	0.0460358	331	402	733
comp2277816_c0_seq2_m.86536	-0.257803	-0.259176	0.0274566	0.0516513	0.0796016	0.0369393	367	367	734
comp2254167_c0_seq1_m.43587	0.231104	0.230195	0.0243847	0.0528459	0.0747704	0.0416667	347	387	734
comp2268336_c0_seq2_m.65472	-0.148958	-0.148858	0.0254342	0.0522124	0.0760167	0.039267	355	381	736
comp2273628_c0_seq6_m.75728	-0.319098	-0.331068	0.0297681	0.045359	0.0840139	0.034188	377	360	737
comp2273519_c1_seq9_m.75533	0.446551	0.457484	0.0378324	0.0377227	0.0982601	0.028125	413	325	738
comp2278133_c0_seq3_m.87701	0.235971	0.23238	0.0252328	0.0529361	0.07598	0.0415584	353	386	739
comp2263822_c0_seq1_m.57945	0.211502	0.212423	0.0237568	0.0551983	0.0732672	0.0455696	345	394	739
comp2276743_c1_seq1_m.83170	0.215655	0.213401	0.0247879	0.0555508	0.0755712	0.0454545	349	392	741
comp2261362_c0_seq2_m.54116	0.651561	0.572988	0.054143	0.036516	0.128303	0.025641	449	294	743
comp2272182_c0_seq2_m.72649	0.294275	0.288855	0.0301782	0.0489239	0.0848656	0.0356164	379	365	744
comp2276719_c0_seq5_m.83124	-0.334114	-0.324302	0.0314036	0.0448026	0.086599	0.0344828	384	363	747
comp2271783_c0_seq2_m.71842	-0.183972	-0.183796	0.0242524	0.0598637	0.0745798	0.0460048	346	401	747
comp2268417_c0_seq2_m.65592	-0.192052	-0.19225	0.0249984	0.0597735	0.07598	0.0461165	351	403	754
comp2267341_c0_seq1_m.63653	-0.188972	-0.18717	0.0226754	0.0571767	0.0710026	0.0471464	341	413	754
comp2276412_c0_seq1_m.82311	-0.163297	-0.163569	0.0254163	0.0612519	0.0760167	0.0458937	356	399	755
comp2220386_c0_seq1_m.18230	0.15867	0.15838	0.0251763	0.0596833	0.07598	0.0462287	350	405	755
comp2276295_c0_seq1_m.82012	-0.457927	-0.447817	0.0421625	0.0403158	0.105555	0.0286145	425	331	756
comp2278536_c1_seq38_m.89884	0.228953	0.233617	0.0271674	0.055641	0.0790349	0.0453401	366	391	757
comp2268857_c0_seq2_m.66328	-0.210287	-0.213453	0.0245048	0.0563628	0.0749226	0.0475	348	416	764
comp2278362_c0_seq1_m.88712	-0.208627	-0.211725	0.0252791	0.0574539	0.07598	0.0469136	354	411	765
comp2271909_c0_seq2_m.72111	-0.208778	-0.210983	0.0314165	0.0630695	0.086599	0.0455635	383	393	776
comp2072973_c0_seq1_m.5296	0.248154	0.245746	0.0302294	0.0549305	0.0848656	0.0458015	378	398	776
comp2260960_c0_seq2_m.53456	0.483264	0.457768	0.0486954	0.0423562	0.118022	0.0324484	438	341	779
comp2228430_c0_seq1_m.21640	0.249819	0.243917	0.0305778	0.0548402	0.0856125	0.0459184	380	400	780
comp2278161_c0_seq3_m.87805	0.224611	0.222083	0.0284592	0.0579229	0.0811812	0.046683	373	409	782
comp2263909_c0_seq2_m.58087	0.146615	0.146768	0.0279683	0.0573637	0.0804277	0.0470297	370	412	782
gnl_Pdu_trscr_assembly_1_1213_m.70099	-0.167046	-0.167995	0.0267664	0.0640977	0.0782401	0.047619	364	418	782
comp2277759_c0_seq3_m.86312	0.262893	0.260687	0.034414	0.0557312	0.0931718	0.0452261	393	390	783
comp2275833_c0_seq1_m.80771	-0.313198	-0.325062	0.0384395	0.0515611	0.098407	0.037037	416	368	784
comp2272882_c0_seq14_m.74184	-0.521707	-0.467262	0.0554527	0.0440056	0.130535	0.0318841	452	335	787
comp2276202_c0_seq3_m.81780	0.319771	0.307446	0.0394499	0.0513806	0.100418	0.037234	418	370	788
comp2222959_c0_seq1_m.19328	-0.416893	-0.440218	0.0461098	0.0458026	0.113043	0.0338983	434	357	791
comp2273216_c0_seq3_m.74900	0.157406	0.157002	0.0296634	0.0686203	0.0840139	0.0537383	376	423	799
comp2271636_c1_seq22_m.71557	-0.170446	-0.169192	0.0286186	0.0680789	0.0814175	0.0541176	374	426	800
comp2234837_c0_seq1_m.25285	0.203307	0.202417	0.0306564	0.0639173	0.0856125	0.0478469	381	421	802
comp2277847_c1_seq10_m.86637	-0.457732	-0.491364	0.0489169	0.0446269	0.118022	0.0345821	441	364	805
comp1226347_c0_seq1_m.1231	0.250746	0.25778	0.0366836	0.059593	0.097335	0.0463415	401	406	807
gnl_Pdu_trscr_assembly_1_9334_m.28552	0.207725	0.21155	0.0315874	0.0640075	0.086845	0.0477327	387	420	807
comp2277605_c1_seq7_m.85828	0.335581	0.339101	0.0437629	0.0521222	0.108556	0.0393701	429	382	811
comp2257781_c0_seq1_m.48513	0.32624	0.33747	0.0437694	0.0530263	0.108556	0.0414508	428	385	813
comp2270845_c1_seq1_m.69967	0.26687	0.270023	0.0380541	0.0581974	0.0982601	0.0465686	411	408	819
comp2265589_c0_seq2_m.60673	-0.142951	-0.142647	0.0336502	0.069812	0.0918203	0.0559441	389	430	819
comp2269230_c0_seq2_m.67055	-0.208248	-0.212486	0.0350726	0.0683515	0.0939563	0.0539906	397	425	822
comp2274096_c1_seq4_m.76855	0.344423	0.325297	0.0488035	0.0534887	0.118022	0.0412371	440	383	823
comp2260519_c0_seq10_m.52611	-0.211962	-0.211364	0.0349739	0.0675019	0.0939563	0.0542453	396	427	823
comp2269029_c1_seq11_m.66661	-0.141103	-0.141217	0.0345306	0.0700818	0.0932502	0.055814	394	429	823
comp2264121_c0_seq1_m.58459	0.526486	0.470334	0.0601359	0.0456222	0.137601	0.0340909	465	359	824
comp2268391_c0_seq1_m.65566	-0.182197	-0.183914	0.0336559	0.0727735	0.0918203	0.0637813	390	436	826
comp2202068_c0_seq1_m.13304	-0.197299	-0.195375	0.0351453	0.0705414	0.0939563	0.0580046	395	432	827
comp2266473_c1_seq14_m.62086	-0.228395	-0.231998	0.0379204	0.0658355	0.0982601	0.049763	410	422	832
comp2232290_c0_seq2_m.23637	0.281984	0.287455	0.0396515	0.0566259	0.10069	0.0473815	419	415	834
comp2254668_c0_seq2_m.44236	0.195379	0.196326	0.0354191	0.0714887	0.0944509	0.0600462	399	435	834
comp2254376_c0_seq1_m.43911	0.183586	0.183542	0.0357932	0.0746147	0.0952099	0.0654628	400	441	841
comp2258806_c0_seq1_m.49958	0.397423	0.36882	0.0577684	0.0531165	0.133912	0.0413437	459	384	843
comp2277982_c0_seq2_m.87136	0.225974	0.227784	0.0400008	0.0684417	0.101095	0.0538642	421	424	845
comp2141952_c0_seq1_m.7380	0.187955	0.190241	0.0379692	0.0754211	0.0982601	0.0653153	406	440	846
comp1785956_c0_seq1_m.2259	0.314154	0.295908	0.0581412	0.0623195	0.134483	0.0456731	460	395	855
comp2263277_c0_seq1_m.57091	-0.173829	-0.175761	0.0372166	0.0775141	0.097774	0.0688889	404	452	856
comp2277313_c0_seq3_m.84866	0.328666	0.31387	0.0512027	0.0569023	0.122979	0.0472637	443	414	857
comp2266233_c0_seq1_m.61658	0.508456	0.479449	0.0695797	0.0509323	0.152848	0.0376344	484	374	858
comp2265735_c0_seq4_m.60895	-0.129058	-0.129051	0.0429225	0.0718543	0.107205	0.0597701	426	433	859
comp2274258_c1_seq4_m.77217	-0.167399	-0.168003	0.0368013	0.0784239	0.0974046	0.0704846	402	458	860
comp2267169_c0_seq1_m.63315	-0.185406	-0.182622	0.0386274	0.0763224	0.0985601	0.0669643	417	445	862
comp2272559_c0_seq1_m.73440	-0.187112	-0.186696	0.0383756	0.0757791	0.098407	0.0674157	415	448	863
comp2262927_c0_seq2_m.56544	0.228113	0.226289	0.0449381	0.0717641	0.110938	0.0599078	430	434	864
comp2276166_c0_seq8_m.81705	0.344166	0.325937	0.0536092	0.056187	0.127607	0.047619	447	419	866
comp2004487_c0_seq1_m.4269	0.348228	0.324775	0.0584766	0.0587274	0.134966	0.0464548	461	407	868
comp2254566_c0_seq1_m.44122	-0.159531	-0.160934	0.0375057	0.0806184	0.0982601	0.0715835	408	461	869
comp2251594_c0_seq1_m.40214	-0.161978	-0.161016	0.0375866	0.0803327	0.0982601	0.0717391	407	462	869
gnl_Pdu_trscr_assembly_1_1986_m.5698	-0.300364	-0.307699	0.0574276	0.0648017	0.133705	0.0475059	457	417	874
comp2275478_c0_seq7_m.79935	0.230453	0.226491	0.0464719	0.072406	0.113669	0.0642202	435	439	874
comp2278238_c0_seq6_m.88188	0.208128	0.202995	0.0449024	0.0761353	0.110938	0.0671141	431	446	877
comp2254394_c0_seq2_m.43926	-0.183846	-0.184238	0.0407927	0.0797951	0.102617	0.0700219	422	455	877
comp2251866_c0_seq1_m.40557	-0.14741	-0.148194	0.0384749	0.0819107	0.098407	0.0732759	414	465	879
comp2272842_c0_seq2_m.74081	-0.378604	-0.401972	0.0635486	0.0577472	0.142676	0.046798	473	410	883
comp2259823_c0_seq1_m.51564	0.213788	0.208869	0.0486003	0.0777829	0.118022	0.0685841	437	450	887
comp2272319_c0_seq24_m.72950	0.181024	0.179327	0.0421198	0.0821842	0.105555	0.0731183	424	464	888
comp2234282_c0_seq1_m.24908	0.242427	0.237342	0.0526914	0.0740658	0.125703	0.0659091	446	444	890
comp2132126_c0_seq4_m.6558	0.264169	0.268524	0.0577041	0.0726833	0.133912	0.0639269	458	437	895
comp2278390_c0_seq1_m.88826	0.158601	0.158374	0.0407959	0.0872199	0.102617	0.0866808	423	472	895
comp2246119_c0_seq1_m.34306	0.227148	0.220869	0.0538801	0.0781447	0.127965	0.0684327	448	449	897
comp2272583_c0_seq2_m.73488	-0.135437	-0.135136	0.0433872	0.0868571	0.108112	0.0868644	427	473	900
comp2266755_c0_seq1_m.62616	0.533044	0.461466	0.0837915	0.0551081	0.17447	0.0456853	511	396	907
comp2256095_c0_seq1_m.46136	-0.172809	-0.175392	0.0458963	0.0904361	0.11278	0.092437	433	477	910
comp2253149_c0_seq1_m.42245	0.267516	0.255472	0.0619031	0.0744323	0.139567	0.0656109	471	442	913
comp2272961_c0_seq1_m.74370	0.182068	0.180945	0.048823	0.0905263	0.118022	0.0922432	439	476	915
comp1194343_c0_seq1_m.800	-0.137275	-0.137788	0.0454229	0.0932857	0.111875	0.0977131	432	484	916
comp2279272_c0_seq1_m.91086	0.170231	0.168836	0.0478036	0.0939267	0.116658	0.0975104	436	483	919
comp2269906_c0_seq2_m.68214	-0.250721	-0.250685	0.0614979	0.0772528	0.139518	0.0690423	468	453	921
comp2276968_c0_seq3_m.83862	0.233007	0.22388	0.0591363	0.0808158	0.136193	0.0714286	462	460	922
comp2274238_c3_seq9_m.77182	-0.174489	-0.172683	0.0513214	0.0958534	0.122986	0.0971074	444	481	925
comp1896477_c0_seq1_m.2604	-0.229839	-0.235719	0.0609684	0.0845113	0.139207	0.0790598	466	468	934
comp2276160_c0_seq4_m.81678	-0.256331	-0.261501	0.0652526	0.0786015	0.144945	0.0703297	479	457	936
comp2276031_c0_seq51_m.81296	0.308925	0.288154	0.0750378	0.0742538	0.161293	0.0657596	495	443	938
comp2252186_c0_seq3_m.40915	-0.361416	-0.357718	0.0834091	0.0707284	0.174356	0.0578704	508	431	939
comp2274888_c0_seq2_m.78557	0.240087	0.243101	0.0635604	0.0829239	0.142676	0.0770878	474	467	941
comp2234079_c0_seq2_m.24745	0.225472	0.220636	0.0616521	0.0867669	0.139567	0.0870488	470	474	944
comp2262720_c0_seq1_m.56199	0.254809	0.244124	0.0669104	0.0802425	0.147397	0.0718954	483	463	946
comp2241992_c0_seq1_m.30524	0.193989	0.188301	0.0611509	0.0979831	0.139325	0.0969072	467	480	947
comp2274246_c0_seq1_m.77191	-0.306475	-0.329852	0.0783898	0.0759577	0.166808	0.0672646	501	447	948
comp2262185_c0_seq1_m.55318	0.623613	0.526565	0.109336	0.0616974	0.209233	0.0457831	556	397	953
comp2268473_c1_seq1_m.65668	0.359901	0.346449	0.0860599	0.0724962	0.177457	0.0640732	516	438	954
comp2279235_c0_seq1_m.91078	-0.219406	-0.22408	0.064497	0.0917256	0.14417	0.0960334	476	479	955
comp2266500_c0_seq1_m.62123	-0.27887	-0.279798	0.0772819	0.0812538	0.165116	0.0712743	498	459	957
comp2247176_c0_seq3_m.35337	-0.238387	-0.227997	0.0668434	0.0866767	0.147397	0.087234	482	475	957
comp2263073_c0_seq1_m.56786	0.240324	0.228618	0.0705706	0.0890517	0.153867	0.0863158	488	470	958
comp2270085_c0_seq9_m.68531	0.224162	0.224446	0.0696724	0.0941927	0.152848	0.0973085	485	482	967
comp2265494_c0_seq1_m.60519	0.314261	0.289166	0.0872594	0.0799727	0.178677	0.069869	519	454	973
comp2275295_c1_seq2_m.79482	0.515008	0.441741	0.104644	0.06686	0.202808	0.0543735	548	428	976
comp2263921_c0_seq2_m.58101	0.250411	0.261239	0.0775855	0.0914549	0.165433	0.0941423	499	478	977
comp2265883_c1_seq1_m.61140	0.342648	0.32009	0.0925795	0.0776927	0.186562	0.0687361	528	451	979
comp2274262_c0_seq1_m.77231	0.291058	0.270091	0.0884947	0.0875056	0.18038	0.0864979	522	471	993
comp2276747_c1_seq2_m.83192	0.261535	0.244425	0.0847646	0.0931081	0.176148	0.0979167	513	485	998
comp2227117_c0_seq2_m.21047	0.386399	0.345485	0.106622	0.0794323	0.205519	0.0701754	552	456	1008
comp2262137_c0_seq4_m.55246	0.347828	0.380278	0.103448	0.0852002	0.201221	0.0831557	547	469	1016
comp2245687_c1_seq1_m.33822	0.402864	0.350199	0.115022	0.0825489	0.215463	0.0751073	568	466	1034

## Sheet: IM_NM vs M_NM_Female
	limma.logFC	rots.logFC	limma.pvalue	rots.pvalue	limma.adj.pvalue	rots.adj.pvalue	limma.rank	rots.rank	rank.sum
comp2242933_c0_seq1_m.31351	1.62224	1.62584	1.69e-07	9.02256e-05	0.000179909	0	1	1	2
gene17_m.92593	1.55385	1.55562	5.54e-07	0.000180451	0.000294976	0	2	2	4
comp2272698_c0_seq4_m.73763	1.03524	1.03492	1.08e-06	0.000360902	0.000383061	0	3	3	6
comp2247988_c0_seq1_m.36173	-1.20869	-1.21037	2.2e-06	0.000451128	0.000586466	0	4	4	8
comp2262137_c0_seq4_m.55246	-0.972617	-0.974628	3.2e-06	0.000541353	0.00063816	0	5	5	10
comp2272319_c0_seq24_m.72950	1.67755	1.69018	3.6e-06	0.000270677	0.00063816	0	6	6	12
comp2256041_c0_seq1_m.46046	0.989815	0.990119	1.56e-05	0.000721805	0.00236956	0	7	7	14
comp2277680_c0_seq25_m.86056	-0.722177	-0.721233	2.1e-05	0.000902256	0.0027899	0	8	8	16
comp2234282_c0_seq1_m.24908	0.952525	0.945862	2.66e-05	0.00081203	0.00285688	0	9	9	18
comp2271994_c0_seq2_m.72269	-1.17059	-1.16721	2.69e-05	0.000631579	0.00285688	0	10	10	20
comp2265897_c0_seq5_m.61166	0.680737	0.678971	3.43e-05	0.00135338	0.00304221	0	11	11	22
comp2266280_c0_seq1_m.61789	0.876652	0.876584	3.35e-05	0.000992481	0.00304221	0	12	12	24
comp2263011_c0_seq1_m.56689	0.770215	0.76464	5.86e-05	0.00144361	0.0047961	0	13	13	26
comp2275110_c1_seq5_m.79090	0.720211	0.724375	6.43e-05	0.00153383	0.00487819	0	14	14	28
comp2278587_c0_seq14_m.90327	-0.580468	-0.580648	6.88e-05	0.00216541	0.00487819	0	15	15	30
comp2269185_c0_seq2_m.66963	-0.630804	-0.633123	7.92e-05	0.00225564	0.00495721	0	16	16	32
comp2275841_c0_seq1_m.80783	-0.718867	-0.72381	7.71e-05	0.00189474	0.00495721	0	17	17	34
comp2272233_c0_seq1_m.72760	-0.553956	-0.555197	0.000100717	0.00261654	0.00595351	0	18	18	36
comp2237468_c0_seq1_m.27022	-1.18543	-1.21225	0.000117501	0.00117293	0.00601773	0	19	19	38
comp2261399_c0_seq2_m.54155	-1.17906	-1.20022	0.000118771	0.00126316	0.00601773	0	20	20	40
gnl_Pdu_trscr_assembly_1_91632_m.21453	0.831518	0.822306	0.000111258	0.00171429	0.00601773	0	21	21	42
comp2263291_c0_seq2_m.57114	0.735984	0.741387	0.000129893	0.00234586	0.0062821	0	22	22	44
comp2254167_c0_seq1_m.43587	0.809	0.816422	0.000231365	0.00243609	0.00703945	0	23	23	46
comp2254520_c0_seq1_m.44059	-0.549515	-0.550285	0.000221481	0.00406015	0.00703945	0	24	24	48
comp2258554_c0_seq1_m.49568	-0.501977	-0.502591	0.000204163	0.00415038	0.00703945	0	25	25	50
comp2262137_c0_seq3_m.92268	-1.31532	-1.32985	0.000159413	0.00108271	0.00703945	0	26	26	52
comp2263115_c0_seq2_m.56831	0.451088	0.450848	0.000171063	0.00297744	0.00703945	0	27	27	54
comp2263612_c1_seq1_m.57550	-0.487462	-0.487029	0.000225915	0.00478195	0.00703945	0	28	28	56
comp2265326_c0_seq3_m.60204	-0.770326	-0.773929	0.000200118	0.00252632	0.00703945	0	29	29	58
comp2274819_c0_seq2_m.78403	0.505691	0.507614	0.000212912	0.00442105	0.00703945	0	30	30	60
comp2275822_c0_seq10_m.80745	-0.881273	-0.883005	0.000168594	0.00207519	0.00703945	0	31	31	62
comp2275905_c0_seq4_m.80965	0.688075	0.695272	0.000185315	0.00279699	0.00703945	0	32	32	64
comp2276768_c0_seq2_m.83249	0.681357	0.688108	0.000176885	0.00270677	0.00703945	0	33	33	66
comp2278077_c0_seq3_m.87468	1.04506	1.05429	0.000221712	0.00162406	0.00703945	0	34	34	68
comp2278630_c0_seq8_m.90809	-0.589548	-0.592721	0.000231561	0.0038797	0.00703945	0	35	35	70
comp2261623_c0_seq1_m.54431	-0.728974	-0.722675	0.000260799	0.00288722	0.00749974	0	36	36	72
comp2273257_c0_seq9_m.74986	1.05801	1.0399	0.000257143	0.00180451	0.00749974	0	37	37	74
comp2277933_c1_seq7_m.86947	-0.726316	-0.733633	0.000269372	0.00306767	0.00754242	0	38	38	76
comp2267341_c0_seq1_m.63653	0.461917	0.463399	0.000298	0.00577444	0.0079268	0	39	39	78
comp2268473_c1_seq1_m.65668	1.08247	1.06345	0.000292897	0.00198496	0.0079268	0	40	40	80
comp2259221_c0_seq1_m.50687	0.502593	0.501321	0.000343605	0.00604511	0.00850223	0	41	41	82
comp2266171_c0_seq1_m.61557	0.635489	0.6359	0.000341374	0.0042406	0.00850223	0	42	42	84
comp2276750_c0_seq1_m.83194	0.756653	0.745018	0.000333569	0.00333835	0.00850223	0	43	43	86
comp2254641_c1_seq1_m.44200	-0.461082	-0.462842	0.000358953	0.00649624	0.00852265	0	44	44	88
comp2266507_c0_seq10_m.62138	-0.438057	-0.438646	0.00036045	0.00658647	0.00852265	0	45	45	90
comp1945561_c0_seq2_m.3380	-0.806655	-0.812746	0.000479114	0.0035188	0.00961843	0	46	46	92
comp2256220_c0_seq1_m.46316	-0.660448	-0.655229	0.000447211	0.00487218	0.00961843	0	47	47	94
comp2271350_c0_seq18_m.70897	0.755108	0.768265	0.000475704	0.00378947	0.00961843	0	48	48	96
comp2271350_c0_seq18_m.70898	0.7366	0.742445	0.000478078	0.00396992	0.00961843	0	49	49	98
comp2272961_c0_seq1_m.74370	0.669413	0.674543	0.000434247	0.00469173	0.00961843	0	50	50	100
comp2276277_c0_seq18_m.81972	0.544146	0.5444	0.000434908	0.00613534	0.00961843	0	51	51	102
comp2277908_c1_seq11_m.86865	0.52893	0.526824	0.000455845	0.00667669	0.00961843	0	52	52	104
gnl_Pdu_trscr_assembly_1_5530_m.58454	-0.578486	-0.57371	0.000460499	0.00595489	0.00961843	0	53	53	106
gnl_Pdu_trscr_assembly_1_16296_m.13041	-0.497975	-0.501775	0.000489284	0.00703759	0.0096407	0	54	54	108
comp2257905_c0_seq1_m.48664	-0.551248	-0.555613	0.000513887	0.00676692	0.00976385	0	55	55	110
comp2277729_c0_seq10_m.86207	-0.680144	-0.671787	0.000511242	0.00505263	0.00976385	0	56	56	112
comp2267209_c0_seq1_m.63399	-0.551338	-0.551372	0.000530033	0.00685714	0.00989394	0	57	57	114
comp2274446_c0_seq19_m.77642	-0.48095	-0.477875	0.000554123	0.00793985	0.0101653	0	58	58	116
comp2204672_c0_seq1_m.13711	-0.431626	-0.43197	0.000588174	0.00911278	0.0101839	0	59	59	118
comp2262317_c0_seq2_m.55577	0.6543	0.646417	0.000654412	0.00586466	0.0101839	0	60	60	120
comp2263277_c0_seq1_m.57091	-0.45688	-0.457666	0.000706973	0.00938158	0.0101839	0	61	61	122
comp2263822_c0_seq1_m.57945	0.769184	0.784272	0.000676817	0.0046015	0.0101839	0	62	62	124
comp2263928_c0_seq2_m.58107	0.673708	0.67947	0.00069289	0.00559398	0.0101839	0	63	63	126
comp2264838_c0_seq3_m.59436	-0.939976	-0.962981	0.000654524	0.00324812	0.0101839	0	64	64	128
comp2269171_c0_seq3_m.66933	0.84646	0.824384	0.00066993	0.00369925	0.0101839	0	65	65	130
comp2269580_c0_seq1_m.67656	0.474511	0.471795	0.000648942	0.00884211	0.0101839	0	66	66	132
comp2272547_c0_seq4_m.73421	-0.501026	-0.50103	0.000700897	0.00875188	0.0101839	0	67	67	134
comp2274541_c0_seq1_m.77862	-0.929137	-0.947704	0.000717851	0.00342857	0.0101839	0	68	68	136
comp2275107_c0_seq4_m.79080	-0.444295	-0.441952	0.000591557	0.00902256	0.0101839	0	69	69	138
comp2276743_c0_seq1_m.83169	0.465541	0.462494	0.000631037	0.00893233	0.0101839	0	70	70	140
comp2277337_c0_seq4_m.84929	0.396427	0.397175	0.00063226	0.00929135	0.0101839	0	71	71	142
comp2277501_c0_seq23_m.85461	-0.373409	-0.373083	0.000589084	0.00803008	0.0101839	0	72	72	144
comp2278405_c0_seq22_m.88893	-0.716276	-0.702328	0.000596638	0.00496241	0.0101839	0	73	73	146
comp2278474_c0_seq1_m.89294	-0.53443	-0.534009	0.000712855	0.00784962	0.0101839	0	74	74	148
comp2278554_c0_seq4_m.90013	-0.557032	-0.56357	0.000677515	0.00730827	0.0101839	0	75	75	150
comp2229729_c0_seq1_m.22264	0.463016	0.464306	0.000779552	0.00965226	0.0103631	0	76	76	152
comp2232290_c0_seq2_m.23637	-0.991833	-0.964432	0.000761395	0.00315789	0.0103631	0	77	77	154
comp2270876_c0_seq2_m.70018	-0.528866	-0.530066	0.000753305	0.00821053	0.0103631	0	78	78	156
comp2276035_c1_seq16_m.81307	-0.479738	-0.481867	0.000788921	0.0094718	0.0103631	0	79	79	158
comp2276871_c0_seq8_m.83582	0.773396	0.760939	0.000782014	0.00532331	0.0103631	0	80	80	160
comp2277933_c1_seq7_m.86946	-0.744451	-0.727463	0.0007686	0.00541353	0.0103631	0	81	81	162
comp2263896_c0_seq3_m.58065	0.412273	0.412334	0.000812916	0.0106438	0.010421	0	82	82	164
gnl_Pdu_trscr_assembly_1_16061_m.43221	-0.58987	-0.592447	0.000803155	0.00721805	0.010421	0	83	83	166
comp2277114_c1_seq1_m.84278	0.445384	0.446586	0.000836837	0.0102829	0.0105999	0	84	84	168
comp2252847_c0_seq1_m.41763	0.439254	0.437285	0.000898539	0.010734	0.0106227	0	85	85	170
comp2254470_c0_seq1_m.44006	-0.412597	-0.413199	0.00087736	0.0111852	0.0106227	0	86	86	172
comp2266512_c0_seq8_m.62145	0.386005	0.385478	0.000856713	0.0112754	0.0106227	0	87	87	174
comp2268892_c0_seq1_m.66381	-0.941964	-0.972024	0.00089529	0.00360902	0.0106227	0	88	88	176
comp2279445_c0_seq1_m.91120	-0.430096	-0.428709	0.000892479	0.0109145	0.0106227	0	89	89	178
comp2279567_c0_seq1_m.91146	0.574952	0.570479	0.000875081	0.00766917	0.0106227	0	90	90	180
comp2262281_c0_seq3_m.55504	-0.677357	-0.66329	0.000920705	0.00640602	0.0107652	0	91	91	182
comp2278366_c0_seq5_m.88731	-0.385888	-0.387239	0.000949554	0.0119013	0.0108637	0	92	92	184
gnl_Pdu_trscr_assembly_1_2615_m.68529	0.391749	0.392439	0.000948681	0.0118111	0.0108637	0	93	93	186
comp1958245_c0_seq1_m.3536	-0.364415	-0.364706	0.00097612	0.0120818	0.0109325	0	94	94	188
comp2266692_c0_seq1_m.62504	0.589015	0.580346	0.00097226	0.0081203	0.0109325	0	95	95	190
comp2274806_c0_seq1_m.78376	-0.608567	-0.59753	0.000998341	0.00748872	0.0110649	0	96	96	192
comp1838578_c0_seq1_m.2293	0.818885	0.815403	0.00102962	0.00550376	0.0111787	0	97	97	194
comp2272254_c0_seq4_m.72822	-0.759599	-0.778185	0.00102298	0.00568421	0.0111787	0	98	98	196
comp2246514_c1_seq1_m.34691	-0.510578	-0.510103	0.00104462	0.00992293	0.011227	0	99	99	198
comp2248821_c1_seq2_m.37050	-0.386655	-0.387761	0.00108263	0.0127133	0.0115192	0	100	100	200
comp2267732_c0_seq2_m.64331	-0.491849	-0.489041	0.00111198	0.0103731	0.0115995	0	101	101	202
comp2278062_c0_seq4_m.87412	0.527146	0.527108	0.00111125	0.00974248	0.0115995	0	102	102	204
comp2278376_c0_seq1_m.88768	-0.525385	-0.525179	0.00118099	0.0101024	0.0119674	0	103	103	206
comp2279523_c0_seq1_m.91136	-0.443148	-0.44546	0.00116687	0.012172	0.0119674	0	104	104	208
comp2347711_c0_seq1_contamination_m.91628	-0.703851	-0.708946	0.00117857	0.00694737	0.0119674	0	105	105	210
comp2269987_c0_seq2_m.68354	0.343709	0.342981	0.00120008	0.012984	0.0120461	0	106	106	212
comp2263346_c1_seq31_m.57192	-0.391956	-0.392806	0.00121356	0.0133449	0.0120675	0	107	107	214
comp2269060_c1_seq1_m.66719	-0.90393	-0.921705	0.00122654	0.00523308	0.0120837	0	108	108	216
comp2265768_c0_seq2_m.60943	-0.678687	-0.691719	0.00135616	0.0073985	0.0127695	0	109	109	218
comp2273599_c0_seq7_m.75677	-0.348076	-0.347	0.0013325	0.0145254	0.0127695	0	110	110	220
comp2276426_c0_seq2_m.82339	-0.6316	-0.630582	0.00132826	0.00866165	0.0127695	0	111	111	222
comp2278454_c0_seq1_m.89160	-0.406946	-0.404215	0.00135372	0.0138863	0.0127695	0	112	112	224
gnl_Pdu_trscr_assembly_1_14638_m.60097	-0.508651	-0.515196	0.00131356	0.0108242	0.0127695	0	113	113	226
comp1194294_c0_seq1_m.785	0.412652	0.409797	0.00137143	0.0137058	0.0128	0	114	114	228
comp2004487_c0_seq1_m.4269	0.803372	0.782641	0.00144933	0.00622556	0.0131417	0	115	115	230
comp2254206_c0_seq1_m.43646	0.410052	0.407674	0.00144802	0.014157	0.0131417	0	116	116	232
comp2261379_c0_seq1_m.54133	-0.726983	-0.72571	0.00149449	0.00712782	0.0131417	0	117	117	234
comp2263873_c0_seq9_m.58029	-1.03469	-1.00052	0.00148592	0.00433083	0.0131417	0	118	118	236
comp2264302_c0_seq2_m.58699	-0.67835	-0.689081	0.00146917	0.0077594	0.0131417	0	119	119	238
comp2269230_c0_seq2_m.67055	-0.4762	-0.478116	0.00148978	0.0123524	0.0131417	0	120	120	240
comp2281676_c0_seq1_m.91255	0.65334	0.638836	0.00146886	0.0084812	0.0131417	0	121	121	242
comp2265656_c0_seq3_m.60780	-0.457028	-0.451262	0.00155412	0.0128938	0.013554	0	122	122	244
comp2265885_c0_seq3_m.61143	-0.462303	-0.465247	0.00159752	0.0128036	0.0136175	0	123	123	246
comp2270372_c0_seq1_m.69078	0.350691	0.352013	0.00159981	0.0156983	0.0136175	0	124	124	248
comp2275662_c1_seq10_m.80344	-0.334762	-0.333809	0.00157423	0.0155179	0.0136175	0	125	125	250
comp2276936_c0_seq3_m.83786	0.712389	0.728867	0.00166252	0.00757895	0.014039	0	126	126	252
comp2271649_c0_seq1_m.71599	-0.687405	-0.693114	0.00169961	0.00830075	0.014128	0	127	127	254
isotig10568_m.92324	-1.08821	-1.11571	0.00169433	0.00451128	0.014128	0	128	128	256
comp2274581_c1_seq21_m.92631	-0.520609	-0.51776	0.00174494	0.0119915	0.0143923	0	129	129	258
comp2189372_c0_seq1_m.11219	-0.326095	-0.327127	0.00188495	0.0171372	0.0145359	0	130	130	260
comp2236614_c0_seq1_m.26450	-0.71056	-0.691934	0.00188529	0.00857143	0.0145359	0	131	131	262
comp2239691_c0_seq1_m.28548	-0.856543	-0.844081	0.00180467	0.00631579	0.0145359	0	132	132	264
comp2262465_c0_seq5_m.55795	-1.04835	-1.06271	0.00178611	0.00514286	0.0145359	0	133	133	266
comp2265735_c0_seq4_m.60895	-0.305002	-0.304774	0.00187249	0.0153374	0.0145359	0	134	134	268
comp2274137_c1_seq25_m.76929	0.538591	0.549907	0.00187395	0.0117209	0.0145359	0	135	135	270
comp2275523_c0_seq29_m.80039	0.42551	0.422977	0.00179861	0.0148863	0.0145359	0	136	136	272
comp2277605_c1_seq7_m.85828	0.586358	0.585513	0.0018667	0.0105536	0.0145359	0	137	137	274
comp2278333_c0_seq10_m.88591	-0.454066	-0.45934	0.00186339	0.0143449	0.0145359	0	138	138	276
comp2287273_c0_seq1_contamination_m.91384	0.348061	0.348274	0.00193865	0.0174079	0.0148397	0	139	139	278
comp1781461_c0_seq1_m.2253	-0.561297	-0.553461	0.00196852	0.0114558	0.0148547	0	140	140	280
comp2275445_c0_seq2_m.79869	-0.424589	-0.427698	0.00196352	0.0152472	0.0148547	0	141	141	282
comp2267172_c0_seq1_m.63318	0.402206	0.398502	0.00208652	0.0162387	0.0156342	0	142	142	284
comp2269060_c0_seq1_m.66718	-0.672721	-0.690607	0.00211175	0.00956203	0.0157126	0	143	143	286
comp2256095_c0_seq1_m.46136	-0.476823	-0.473988	0.00218302	0.0144352	0.0161175	0	144	144	288
comp2261368_c1_seq1_m.54120	-0.342912	-0.344379	0.00221161	0.0179568	0.0161175	0	145	145	290
comp2277869_c0_seq29_m.86707	0.379346	0.376939	0.00220254	0.0175883	0.0161175	0	146	146	292
comp2262339_c0_seq1_m.55609	0.373858	0.375641	0.00225386	0.0176786	0.0163137	0	147	147	294
comp2263667_c0_seq1_m.57601	0.61235	0.607217	0.00230641	0.0110047	0.0163602	0	148	148	296
comp2264621_c0_seq1_m.59138	-0.539045	-0.550996	0.00230363	0.0126231	0.0163602	0	149	149	298
comp2275358_c0_seq1_m.79627	-0.397834	-0.401098	0.00228711	0.0173177	0.0163602	0	150	150	300
gnl_Pdu_trscr_assembly_1_326_m.78835	-0.445115	-0.442689	0.00235505	0.0156081	0.0165945	0	151	151	302
comp2205419_c0_seq2_m.13843	-0.50141	-0.500687	0.00238204	0.0139765	0.0166743	0	152	152	304
comp2232909_c0_seq1_m.24034	0.569508	0.555905	0.00244314	0.0122622	0.0169549	0	153	153	306
comp2275698_c0_seq5_m.80432	-0.431575	-0.432913	0.002454	0.0160583	0.0169549	0	154	154	308
comp2271425_c0_seq4_m.71034	-0.315697	-0.314779	0.00248303	0.0184079	0.0170448	0	155	155	310
comp2265386_c0_seq2_m.60299	0.632235	0.648734	0.00254303	0.0110949	0.0172956	0	156	156	312
comp2268441_c0_seq1_m.65632	0.795161	0.788596	0.00255207	0.00839098	0.0172956	0	157	157	314
comp2245721_c0_seq1_m.33844	0.53022	0.533661	0.00258106	0.0135254	0.0173618	0	158	158	316
comp2275542_c0_seq9_m.80087	-0.527272	-0.535852	0.00260806	0.0137961	0.0173618	0	159	159	318
comp2277816_c0_seq2_m.86536	-0.391119	-0.394762	0.00261079	0.0178665	0.0173618	0	160	160	320
comp2278363_c0_seq7_m.88713	-0.362839	-0.365161	0.00263213	0.0183177	0.0173949	0	161	161	322
comp2276668_c0_seq1_m.83017	-0.537412	-0.55016	0.00272669	0.0136156	0.0179087	0	162	162	324
comp2273417_c0_seq5_m.75297	-0.555833	-0.567287	0.00292069	0.0134352	0.0189761	0	163	163	326
comp2276523_c0_seq2_m.82609	0.296694	0.297544	0.00292489	0.0190395	0.0189761	0	164	164	328
comp2252285_c0_seq2_m.41107	-0.456489	-0.449519	0.00300136	0.0164192	0.0192376	0	165	165	330
comp2274537_c0_seq28_m.77857	-0.481369	-0.483005	0.00298526	0.0157885	0.0192376	0	166	166	332
comp1194106_c0_seq1_m.742	0.325308	0.324794	0.00309105	0.0196861	0.0195945	0	167	167	334
comp2260103_c0_seq1_m.51994	-0.341449	-0.343177	0.00311152	0.0195056	0.0195945	0	168	168	336
comp2278054_c0_seq40_m.87392	-0.503479	-0.491788	0.00311229	0.015157	0.0195945	0	169	169	338
comp2276966_c0_seq13_m.83854	-0.320716	-0.321446	0.0031328	0.020047	0.0196076	0	170	170	340
comp1194362_c0_seq2_m.804	0.340524	0.340174	0.00315321	0.0195959	0.01962	0	171	171	342
comp2269297_c0_seq2_m.67181	0.667281	0.680212	0.00317731	0.0113656	0.019624	0	172	172	344
comp2270576_c0_seq1_m.69463	0.580622	0.562677	0.00319074	0.0132547	0.019624	0	173	173	346
comp2261018_c0_seq2_m.53614	-0.356466	-0.360074	0.0032371	0.0192199	0.0197947	0	174	174	348
comp2274295_c0_seq2_m.77311	-0.591408	-0.573375	0.00335688	0.0131645	0.0204098	0	175	175	350
comp2271225_c0_seq5_m.70641	-0.742504	-0.745413	0.00341581	0.0101927	0.0206501	0	176	176	352
comp2253149_c0_seq1_m.42245	0.530348	0.51881	0.00344896	0.0149765	0.0206713	0	177	177	354
comp2269158_c0_seq1_m.66914	0.352603	0.353173	0.00345816	0.0197763	0.0206713	0	178	178	356
comp2270797_c0_seq10_m.69872	-0.499099	-0.51087	0.00353261	0.015968	0.0209983	0	179	179	358
comp2265049_c0_seq3_m.59764	0.638612	0.616213	0.00368475	0.0124427	0.0214239	0	181	180	361
comp2273865_c0_seq2_m.76255	0.481263	0.475533	0.00366195	0.0168665	0.0214239	0	182	181	363
comp2274278_c0_seq6_m.77267	-0.396019	-0.39989	0.003667	0.0187688	0.0214239	0	183	182	365
comp2266503_c0_seq6_m.62129	-0.484841	-0.48956	0.00371794	0.0166861	0.0214994	0	184	183	367
comp2268798_c0_seq2_m.66233	0.561518	0.563279	0.00373984	0.0147961	0.0215092	0	185	184	369
comp2277475_c0_seq2_m.85365	-0.486681	-0.488543	0.00379839	0.0169568	0.0217285	0	186	185	371
comp2242282_c0_seq1_m.30761	-0.371601	-0.376363	0.00389087	0.0199568	0.0219903	0	188	186	374
gnl_Pdu_trscr_assembly_1_4228_m.63259	-0.594432	-0.613122	0.00390618	0.0140667	0.0219903	0	189	187	376
comp2254477_c0_seq1_m.44015	0.40774	0.41501	0.00411251	0.0189492	0.02303	0	190	188	378
comp2277132_c1_seq1_m.84335	0.502388	0.493312	0.00443524	0.0174981	0.0243252	0	192	189	381
comp2273038_c0_seq3_m.74522	-0.613642	-0.608118	0.0044901	0.0146156	0.0244998	0	195	190	385
comp1953876_c0_seq1_m.3493	0.47715	0.470707	0.00468254	0.0181372	0.0252905	0	196	191	387
comp2272299_c0_seq11_m.72914	-0.52584	-0.538566	0.00477179	0.0172274	0.0254318	0	199	192	391
comp2280591_c0_seq1_m.91233	0.837421	0.793855	0.00480432	0.0104633	0.0254318	0	201	193	394
comp2265883_c1_seq1_m.61140	0.701157	0.679826	0.00516729	0.0130742	0.0268988	0	204	194	398
comp1965369_c0_seq1_contamination_m.3664	0.557277	0.543254	0.00548087	0.0167763	0.0279026	0	209	195	404
comp2269326_c0_seq2_m.67220	-0.328425	-0.330078	0.00355242	0.0208036	0.0209988	0.0046729	180	226	406
comp2253516_c0_seq4_m.42708	-1.01437	-0.96492	0.00606354	0.00983271	0.0299045	0	213	196	409
comp2278589_c0_seq3_m.90346	-0.33435	-0.336234	0.00383778	0.0212519	0.0218364	0.00458716	187	222	409
gnl_Pdu_trscr_assembly_1_1514_m.69841	0.351148	0.355347	0.00442194	0.0213421	0.0243252	0.00456621	194	221	415
comp2273628_c0_seq6_m.75728	-0.468115	-0.479012	0.00629236	0.0191297	0.0305711	0	219	197	416
comp2276442_c0_seq1_m.82386	-0.365411	-0.36415	0.00436942	0.0209812	0.0243252	0.00465116	191	225	416
comp2268857_c0_seq2_m.66328	-0.3572	-0.358191	0.00520415	0.0221607	0.0268988	0.00446429	205	216	421
comp2277388_c0_seq8_m.85093	-0.607575	-0.63339	0.00689083	0.017047	0.032586	0	225	198	423
comp2275478_c0_seq7_m.79935	0.380713	0.375686	0.00488082	0.0211617	0.0257089	0.00460829	202	223	425
comp2274999_c0_seq4_m.78837	0.365437	0.361619	0.00576358	0.0222509	0.0289267	0.00444444	212	215	427
comp2275312_c0_seq8_m.79518	-0.516723	-0.515135	0.00724063	0.0186786	0.0334958	0	229	199	428
comp2269324_c0_seq1_m.67217	0.296224	0.297862	0.00466452	0.0235348	0.0252905	0.00635593	197	232	429
comp2273017_c0_seq1_m.74484	-0.302078	-0.302707	0.00478269	0.023625	0.0254318	0.00632911	200	231	431
comp2279297_c0_seq1_m.91091	0.28704	0.287006	0.00443523	0.0229041	0.0243252	0.00652174	193	238	431
comp2276498_c2_seq1_m.82546	-0.572885	-0.560732	0.00738686	0.018047	0.0338777	0	232	200	432
comp2276648_c1_seq1_m.82962	-0.398573	-0.401055	0.0054493	0.0210714	0.0278753	0.00462963	208	224	432
comp2208474_c0_seq1_m.14351	0.270912	0.271758	0.00472856	0.0233543	0.0254101	0.00641026	198	234	432
comp2277479_c0_seq1_m.85385	-0.312493	-0.31224	0.0050308	0.0237152	0.0263683	0.00630252	203	230	433
comp2244968_c0_seq1_m.33120	0.653033	0.636948	0.00744724	0.0161485	0.034008	0	233	201	434
comp2275674_c1_seq1_m.80370	-0.533282	-0.554892	0.00761385	0.0184981	0.0344165	0	236	202	438
comp2278362_c0_seq1_m.88712	-0.327543	-0.329817	0.00561484	0.0239859	0.0283539	0.00622407	211	227	438
comp2140166_c0_seq1_m.7086	0.410752	0.402487	0.00654849	0.0214323	0.0315276	0.00454545	221	220	441
comp2271413_c1_seq5_m.70995	-0.335377	-0.339605	0.00520785	0.0229944	0.0268988	0.00649351	206	237	443
comp2263691_c0_seq2_m.57661	-0.485048	-0.482573	0.00814872	0.0201372	0.0358413	0	242	203	445
comp2277332_c0_seq1_m.84919	0.341949	0.337232	0.00610778	0.0238957	0.0299478	0.00625	217	228	445
comp2142866_c0_seq1_m.7576	0.502861	0.489085	0.00841133	0.0198665	0.0362712	0	245	204	449
comp2277722_c0_seq17_m.86189	-0.352093	-0.353964	0.00598791	0.0231748	0.0299045	0.00643777	216	235	451
comp2280178_c0_seq1_m.91219	-0.9527	-0.878411	0.00888	0.0125329	0.0377933	0	250	205	455
comp2272495_c0_seq1_m.73308	0.585387	0.558243	0.00957417	0.0185883	0.0402645	0	253	206	459
comp2256245_c0_seq1_m.46340	-0.371763	-0.376378	0.00648959	0.0228139	0.031386	0.00655022	220	239	459
comp2257601_c0_seq2_m.48241	-0.302845	-0.301246	0.00607083	0.0266316	0.0299045	0.00954198	214	249	463
comp2214845_c0_seq1_m.16111	0.441748	0.439445	0.0084095	0.0216297	0.0362712	0.00452489	246	219	465
comp2277945_c0_seq2_m.86985	-0.82688	-0.76561	0.0100959	0.0150667	0.0414299	0	260	207	467
comp2269321_c1_seq1_m.67212	-0.30869	-0.310824	0.0061837	0.0265414	0.030181	0.00957854	218	250	468
comp2226643_c0_seq1_m.20830	-0.297421	-0.299579	0.00562282	0.0255536	0.0283539	0.00988142	210	258	468
comp2248808_c0_seq2_m.37043	-0.888232	-0.933838	0.0105099	0.0147058	0.0422157	0	265	208	473
comp2234079_c0_seq2_m.24745	0.362	0.355419	0.00737773	0.0242716	0.0338777	0.00823045	231	242	473
comp2268172_c0_seq1_m.65149	0.309614	0.311914	0.00543563	0.0244474	0.0278753	0.0102459	207	267	474
comp2276413_c0_seq21_m.82313	-0.324124	-0.324275	0.0066353	0.0261833	0.031659	0.00968992	223	253	476
comp2278133_c0_seq3_m.87701	0.327994	0.324418	0.00722202	0.026907	0.0334958	0.0095057	230	248	478
comp2257939_c0_seq1_m.48703	-0.336224	-0.335884	0.00722739	0.0263637	0.0334958	0.00961538	228	251	479
comp2277484_c0_seq6_m.85397	0.324229	0.326684	0.00606329	0.0248158	0.0299045	0.0101215	215	264	479
comp2201786_c0_seq1_m.13247	0.875057	0.827873	0.0115591	0.0154276	0.0448866	0	274	209	483
comp2264022_c0_seq13_m.58310	0.342952	0.337232	0.00802454	0.0271852	0.0357243	0.00943396	239	246	485
comp2276743_c1_seq1_m.83170	0.341277	0.341795	0.00818556	0.0274502	0.0358413	0.0093985	243	245	488
comp2274517_c0_seq1_m.77807	0.340437	0.340893	0.0066312	0.0246353	0.031659	0.0102041	222	266	488
comp2264888_c0_seq4_m.59493	0.633132	0.605577	0.012005	0.018859	0.0459422	0	280	210	490
comp2202068_c0_seq1_m.13304	-0.347557	-0.342968	0.00748836	0.0258233	0.0340496	0.00980392	234	256	490
comp2277815_c1_seq2_m.86535	0.832789	0.861861	0.0121909	0.0163289	0.0461607	0	281	211	492
comp1226347_c0_seq1_m.1231	0.291501	0.29326	0.0067929	0.0287603	0.0322663	0.0128205	224	271	495
comp2265494_c0_seq1_m.60519	0.585348	0.569482	0.0132108	0.0203148	0.0483035	0	291	212	503
comp2241992_c0_seq1_m.30524	0.367174	0.364068	0.00857675	0.0259135	0.036797	0.00976562	248	255	503
gnl_Pdu_trscr_assembly_1_17807_m.62055	0.254695	0.253664	0.00702553	0.0299586	0.033076	0.0160142	226	278	504
comp1785956_c0_seq1_m.2259	0.503565	0.490637	0.0132764	0.022438	0.0483772	0.00442478	292	214	506
comp2277203_c0_seq4_m.84565	0.45055	0.44316	0.0110152	0.0230846	0.0434401	0.00646552	270	236	506
comp2270404_c0_seq3_m.69137	-0.37992	-0.388065	0.0102209	0.0270949	0.041667	0.0094697	261	247	508
comp2274748_c1_seq11_m.78259	-0.286347	-0.285388	0.00706767	0.0295028	0.0331277	0.0161871	227	281	508
comp2262927_c0_seq2_m.56544	0.327397	0.323895	0.00816342	0.0284859	0.0358413	0.0128676	241	272	513
comp2261971_c0_seq1_m.55022	-0.397622	-0.394189	0.0101238	0.0252829	0.0414299	0.01	255	261	516
comp2274713_c1_seq7_m.78178	0.395737	0.398305	0.0100184	0.0254633	0.0414299	0.00992063	258	259	517
comp2258554_c1_seq2_m.49570	-0.479063	-0.483664	0.0120901	0.0226335	0.0459422	0.00660793	279	241	520
comp2277243_c1_seq3_m.84671	0.325323	0.322828	0.00842009	0.0293073	0.0362712	0.0144404	247	277	524
comp2265589_c0_seq2_m.60673	0.252038	0.253141	0.00763373	0.0318675	0.0344165	0.0204778	235	290	525
comp2139115_c0_seq1_m.6894	-0.78935	-0.72447	0.0152678	0.0182274	0.0515714	0	314	213	527
comp2270220_c0_seq1_m.68776	0.554063	0.572494	0.0151121	0.0219831	0.0513716	0.0044843	310	217	527
comp2277313_c0_seq3_m.84866	0.491037	0.480139	0.0137531	0.0234445	0.0489407	0.00638298	299	233	532
comp2276202_c0_seq3_m.81780	0.41708	0.403584	0.0116133	0.0256438	0.0449331	0.00984252	275	257	532
comp2268964_c0_seq1_m.66515	-0.416695	-0.404278	0.0113986	0.0253731	0.0444255	0.00996016	273	260	533
comp2266680_c0_seq1_m.62479	-0.321954	-0.321215	0.00953987	0.0313158	0.0402645	0.0190311	252	284	536
comp2273193_c0_seq1_m.74830	-0.502802	-0.524545	0.0135631	0.0227237	0.0485896	0.00657895	297	240	537
comp2262360_c0_seq1_m.55644	-0.584437	-0.615895	0.0164848	0.0218055	0.0546412	0.0045045	321	218	539
comp2273141_c0_seq2_m.74737	-0.264258	-0.262009	0.00930419	0.034687	0.0394409	0.0207006	251	294	545
comp2276634_c1_seq3_m.82935	0.435984	0.426104	0.0134413	0.0262735	0.0483961	0.00965251	294	252	546
comp2272437_c1_seq1_m.73204	0.381462	0.391386	0.0111195	0.0280273	0.0435273	0.0130597	271	276	547
comp2246119_c0_seq1_m.34306	0.346458	0.339941	0.010481	0.0302265	0.0422157	0.0177305	264	283	547
comp2212572_c0_seq1_m.15390	0.263816	0.2629	0.00808629	0.032859	0.0358413	0.0216667	240	308	548
comp2253875_c0_seq1_m.43271	0.33557	0.330504	0.0102856	0.0309474	0.0417705	0.0192308	262	287	549
comp2263661_c0_seq1_m.57595	-0.256924	-0.257987	0.00795813	0.0324107	0.0355775	0.0219595	238	313	551
comp2279213_c0_seq1_m.91075	0.253696	0.253071	0.00776982	0.0323205	0.0348822	0.0220339	237	315	552
comp2277088_c0_seq32_m.84183	-0.274204	-0.275352	0.00884204	0.0333271	0.0377829	0.0213816	249	304	553
comp1244797_c0_seq1_m.1278	0.271619	0.273576	0.00822463	0.0327688	0.0358648	0.0217391	244	309	553
comp2268336_c1_seq1_m.65474	0.389338	0.394934	0.0127491	0.0289408	0.0475967	0.0127273	285	269	554
comp2258349_c0_seq1_m.49321	-0.223402	-0.223571	0.00995678	0.0338816	0.0414299	0.0211039	254	300	554
comp2277374_c0_seq2_m.85051	0.435922	0.417047	0.0150938	0.0276288	0.0513716	0.0093633	313	244	557
gnl_Pdu_trscr_assembly_1_20144_m.60515	0.452694	0.43705	0.0134243	0.0249962	0.0483961	0.0100402	296	262	558
comp2263658_c0_seq3_m.57592	-0.335045	-0.327934	0.0107859	0.031687	0.0429821	0.0206186	267	292	559
comp2276461_c0_seq7_m.82444	-0.299511	-0.301974	0.0100623	0.0332368	0.0414299	0.0214521	259	305	564
comp2275625_c0_seq11_m.80264	-0.512962	-0.53902	0.0168548	0.0241814	0.0556942	0.00826446	322	243	565
comp2276940_c0_seq2_m.83802	-0.556808	-0.543154	0.0191401	0.0238055	0.0602842	0.00627615	338	229	567
comp2268937_c0_seq1_m.66472	0.310953	0.312016	0.0099938	0.0326786	0.0414299	0.0218121	257	310	567
comp2271539_c0_seq2_m.71326	0.308063	0.313568	0.0110233	0.0337914	0.0434401	0.0211726	269	301	570
comp2261876_c0_seq1_m.54865	-0.36946	-0.358159	0.0129766	0.0310376	0.0480857	0.0191638	287	286	573
comp2243933_c0_seq1_m.32211	-0.370306	-0.38052	0.0128452	0.0307603	0.0477878	0.0192982	286	288	574
comp2269611_c0_seq1_m.67728	0.316693	0.315356	0.0123875	0.0344201	0.0467388	0.0207668	282	295	577
comp2263983_c0_seq1_m.58208	0.243077	0.241911	0.00992118	0.0366945	0.0414299	0.0247678	256	325	581
comp2262197_c0_seq1_m.55346	0.48989	0.465688	0.016007	0.0247256	0.0533901	0.0101626	319	265	584
comp1876805_c0_seq1_m.2339	0.264943	0.262386	0.0105434	0.0374098	0.0422157	0.0244648	263	321	584
comp2278536_c1_seq38_m.89884	-0.388974	-0.375675	0.0140134	0.0304041	0.0493007	0.0176678	303	282	585
comp2272433_c0_seq1_m.73197	0.287675	0.284143	0.0105539	0.035047	0.0422157	0.0222222	266	319	585
comp2273845_c0_seq2_m.76206	0.336529	0.343036	0.0117938	0.0325009	0.0454658	0.0218855	276	311	587
comp2277282_c0_seq11_m.84762	0.328911	0.33568	0.0134636	0.0343299	0.0483961	0.0208333	295	296	591
comp2270828_c0_seq11_m.69939	-0.387937	-0.390722	0.0147054	0.0312256	0.050882	0.0190972	308	285	593
gnl_Pdu_trscr_assembly_1_1986_m.5697	-0.342587	-0.344031	0.0131096	0.0331466	0.0480987	0.0215232	290	306	596
comp2274783_c0_seq9_m.78326	-0.449961	-0.434993	0.0179446	0.029031	0.0582693	0.0126812	330	268	598
comp2278422_c0_seq1_m.89011	0.339552	0.34173	0.0136583	0.0337011	0.0487666	0.0212418	298	302	600
comp2277977_c1_seq3_m.87126	-0.268864	-0.268112	0.0111273	0.0378797	0.0435273	0.0273556	272	333	605
comp2263787_c0_seq3_m.57874	0.346632	0.348134	0.014729	0.0340592	0.050882	0.0210356	307	299	606
comp2275270_c0_seq2_m.79424	0.317602	0.322366	0.0130609	0.0352227	0.0480857	0.0221519	289	318	607
comp2273204_c0_seq26_m.74869	-0.299829	-0.302869	0.012489	0.0366043	0.0469552	0.0248447	283	326	609
comp2264743_c0_seq3_m.59295	-0.235304	-0.236367	0.0109984	0.0387998	0.0434401	0.0299401	268	342	610
comp2272842_c0_seq2_m.74081	-0.481501	-0.5086	0.0198555	0.0283957	0.0619538	0.0129151	341	273	614
comp2271871_c0_seq8_m.72023	0.332638	0.323975	0.0145783	0.035313	0.0506905	0.022082	305	316	621
comp2277388_c0_seq8_m.85092	-0.458858	-0.468689	0.0200111	0.0297782	0.0622566	0.016129	342	280	622
comp2269201_c0_seq1_m.67004	-0.59841	-0.646411	0.0256162	0.026093	0.0734223	0.00972763	371	254	625
comp2231610_c0_seq1_m.23229	0.317501	0.317827	0.0139626	0.0363252	0.0493007	0.0249221	301	327	628
comp2259349_c0_seq2_m.50877	-0.377604	-0.38717	0.0183768	0.0342397	0.0588943	0.0209003	332	297	629
comp2237757_c0_seq1_m.27251	0.230327	0.229464	0.0119442	0.0407265	0.0458797	0.0319767	277	352	629
comp2247229_c0_seq1_m.35389	0.256097	0.255271	0.012055	0.0404511	0.0459422	0.03207	278	353	631
comp2266701_c0_seq3_m.62512	-0.613024	-0.559532	0.0249467	0.024906	0.0717387	0.0100806	370	263	633
comp2257693_c0_seq3_m.48359	0.22275	0.221905	0.0125742	0.0415724	0.0471092	0.0317003	284	349	633
comp2266801_c0_seq2_m.62707	0.251476	0.252165	0.0130165	0.0421269	0.0480857	0.0314286	288	346	634
comp1335339_c0_seq2_m.1954	0.326803	0.330501	0.0158429	0.0375968	0.053009	0.0243902	317	320	637
comp2265471_c0_seq5_m.60488	0.284496	0.280986	0.0139219	0.0400771	0.0493007	0.0293255	302	335	637
comp2257487_c0_seq1_m.48064	0.213881	0.213914	0.0134046	0.0420367	0.0483961	0.0315186	293	347	640
comp2274043_c0_seq7_m.76739	-0.40603	-0.413522	0.0175414	0.0320461	0.0572517	0.0221088	326	317	643
comp2270996_c0_seq5_m.70236	0.544867	0.512494	0.0263145	0.0288506	0.074663	0.0127737	374	270	644
comp2278012_c0_seq11_m.87235	-0.557781	-0.512757	0.0260722	0.0283055	0.0743721	0.012963	373	274	647
comp2258349_c0_seq1_m.49322	-0.373107	-0.382491	0.0190834	0.0354032	0.0602842	0.0220126	334	314	648
comp2273249_c0_seq4_m.74967	-0.369667	-0.383753	0.0190488	0.0355808	0.0602842	0.0219436	337	312	649
comp2274474_c0_seq5_m.77718	-0.467719	-0.482656	0.0229732	0.0315113	0.0684692	0.0206897	357	293	650
comp1953077_c0_seq1_m.3483	-0.357483	-0.368735	0.0189661	0.0371447	0.0602842	0.0245399	333	322	655
comp1926910_c0_seq1_m.3122	-0.224367	-0.223416	0.0140396	0.0444126	0.0493007	0.032967	300	356	656
comp2271535_c0_seq1_m.71319	0.27622	0.273497	0.0153587	0.042593	0.051714	0.0311615	316	343	659
comp2272724_c0_seq1_m.73818	-0.220057	-0.219717	0.0141583	0.0442256	0.0495539	0.0330579	304	357	661
comp2272371_c0_seq1_m.73054	-0.258384	-0.26152	0.0145765	0.0434126	0.0506905	0.0335196	306	362	668
comp2268340_c1_seq1_m.65478	0.296814	0.29098	0.0158151	0.0409145	0.053009	0.0318841	318	351	669
comp2269814_c0_seq1_m.68069	0.255253	0.251997	0.0152299	0.0446814	0.0515714	0.0327869	315	354	669
comp1916779_c0_seq1_m.2944	-0.270454	-0.269714	0.0150761	0.0428759	0.0513716	0.0338983	309	366	675
comp2280536_c0_seq1_m.91231	0.35765	0.363709	0.0204577	0.0380602	0.0632814	0.0271903	345	331	676
comp2274912_c0_seq4_m.78634	-0.217078	-0.216741	0.0150284	0.0454361	0.0513716	0.0352304	312	367	679
comp2272863_c1_seq5_m.74143	-0.217783	-0.21867	0.0149999	0.0453459	0.0513716	0.0353261	311	368	679
comp2254568_c0_seq1_m.44123	-0.278483	-0.283591	0.0175321	0.0445912	0.0572517	0.0328767	325	355	680
comp2272691_c0_seq4_m.73750	-0.471552	-0.441364	0.0290078	0.0341494	0.0801671	0.0209677	385	298	683
comp2278238_c0_seq6_m.88188	0.279732	0.27465	0.0170471	0.0436833	0.055982	0.033241	324	359	683
comp2143334_c0_seq2_m.7649	0.28028	0.275546	0.0169246	0.043593	0.0557515	0.0333333	323	360	683
comp2263347_c0_seq2_m.57195	0.286107	0.287015	0.0180722	0.0440498	0.0582693	0.0331492	329	358	687
gnl_Pdu_trscr_assembly_1_9334_m.28552	-0.352568	-0.339569	0.0217547	0.0399868	0.0657585	0.0294118	352	336	688
comp2257585_c0_seq1_m.48216	0.290058	0.284433	0.018072	0.0435028	0.0582693	0.0334262	327	361	688
comp2264066_c0_seq3_m.58370	-0.379477	-0.380447	0.0238167	0.0383289	0.0698976	0.027027	361	329	690
comp2272807_c0_seq4_m.74003	-0.252123	-0.251892	0.0164145	0.0458055	0.0545783	0.0378378	320	370	690
comp2267968_c0_seq2_m.64758	-0.386285	-0.383687	0.0239388	0.0379699	0.0698976	0.0272727	362	332	694
comp2268417_c0_seq2_m.65592	-0.507356	-0.469627	0.0319847	0.0335141	0.0865946	0.0213115	393	303	696
comp2258014_c0_seq1_m.48797	-0.744131	-0.663884	0.039347	0.0281175	0.0987386	0.0130112	422	275	697
comp2273911_c0_seq8_m.76361	0.363617	0.354745	0.0237563	0.0401673	0.0698976	0.0292398	363	334	697
comp2260058_c0_seq1_m.51934	0.384707	0.378549	0.0244481	0.0382387	0.0706822	0.0271084	368	330	698
comp2259918_c0_seq1_m.51762	0.251219	0.253834	0.0179689	0.0475733	0.0582693	0.0426667	328	372	700
comp2271124_c0_seq1_m.70454	0.425881	0.442698	0.0276574	0.0370545	0.0772376	0.0246154	381	323	704
comp2236007_c0_seq2_m.26049	0.374879	0.391812	0.0244582	0.0393402	0.0706822	0.0295858	366	338	704
comp2263768_c0_seq2_m.57843	-0.340061	-0.349937	0.022065	0.0414821	0.0662293	0.0317919	354	350	704
comp1888169_c0_seq2_m.2479	0.689634	0.649745	0.0400637	0.0298684	0.0995976	0.0160714	426	279	705
comp2277815_c0_seq5_m.86532	0.614039	0.681409	0.0374197	0.0317773	0.0961818	0.0205479	414	291	705
comp2276747_c1_seq2_m.83192	0.375966	0.359156	0.0244001	0.03925	0.0706822	0.0296736	369	339	708
comp2268906_c0_seq4_m.66401	-0.263822	-0.259158	0.0189627	0.0468214	0.0602842	0.0427807	336	373	709
gnl_Pdu_trscr_assembly_1_998_m.15062	-0.205316	-0.206115	0.0182045	0.0506551	0.0585185	0.0492228	331	382	713
comp2251594_c0_seq1_m.40214	0.319339	0.329061	0.021523	0.0430536	0.0652436	0.0338028	351	365	716
comp2258619_c0_seq2_m.49656	0.29563	0.301171	0.020764	0.0449821	0.0634854	0.0354223	348	369	717
comp2275508_c1_seq3_m.80009	-0.463888	-0.492918	0.0321324	0.0367848	0.0867737	0.0246914	394	324	718
comp2271916_c0_seq1_m.72122	0.266935	0.262575	0.0205783	0.0483167	0.0632814	0.0450928	344	379	723
comp2266755_c0_seq1_m.62616	0.71545	0.667444	0.0433136	0.0305827	0.105701	0.0193662	436	289	725
comp2273647_c0_seq2_m.75785	-0.590968	-0.533096	0.0384549	0.0329492	0.0976516	0.0215947	419	307	726
comp1769718_c0_seq1_m.2239	0.416085	0.428067	0.0296841	0.03889	0.081209	0.0298507	386	341	727
comp2257975_c0_seq1_m.48752	0.20522	0.204739	0.0197812	0.0536128	0.0619037	0.0526316	340	388	728
comp2267169_c0_seq1_m.63315	0.227864	0.229945	0.0191504	0.0524088	0.0602842	0.0535714	335	395	730
comp2252746_c0_seq1_m.41651	-0.276647	-0.278294	0.0231117	0.0488562	0.0686895	0.0447368	358	376	734
comp2261121_c0_seq1_m.53764	0.234923	0.237402	0.0205627	0.0531541	0.0632814	0.0531646	343	392	735
comp2279748_c0_seq1_m.91174	0.30777	0.310016	0.0239162	0.0460009	0.0698976	0.0404313	365	371	736
comp2278623_c0_seq6_m.90693	0.23076	0.227848	0.0209887	0.054266	0.0639886	0.0525	349	387	736
gnl_Pdu_trscr_assembly_1_7327_m.81715	-0.232434	-0.232588	0.0205531	0.0534323	0.0632814	0.0528967	346	390	736
comp2254668_c0_seq2_m.44236	0.286279	0.291278	0.02336	0.0481288	0.0692342	0.0452128	359	380	739
gnl_Pdu_trscr_assembly_1_1644_m.62862	-0.239215	-0.240275	0.0196013	0.0515874	0.0615215	0.0542636	339	400	739
comp2277617_c1_seq7_m.85877	-0.244353	-0.245077	0.0221167	0.0535226	0.0662293	0.0527638	356	389	745
comp2278605_c1_seq8_m.90480	-0.449557	-0.424487	0.0348698	0.0391598	0.0910176	0.0297619	408	340	748
comp2274301_c0_seq6_m.77327	0.315047	0.304193	0.026902	0.0467312	0.0759249	0.0428954	377	374	751
comp2263771_c0_seq2_m.57851	0.218425	0.21741	0.0206617	0.055359	0.0633546	0.0569307	347	404	751
comp2252059_c0_seq1_m.40786	0.280048	0.278759	0.0245129	0.0500047	0.0706822	0.0496084	367	385	752
comp2276314_c0_seq1_m.82075	0.380466	0.363239	0.0317891	0.0433224	0.0862848	0.0336134	392	363	755
comp2277413_c0_seq4_m.85165	-0.238659	-0.240193	0.0221594	0.0546259	0.0662293	0.0548628	355	402	757
comp2271675_c0_seq2_m.71655	0.430983	0.403743	0.0374675	0.0422171	0.0961818	0.031339	413	345	758
comp2267558_c0_seq1_m.64038	-0.22382	-0.222669	0.0219646	0.0571165	0.0662049	0.0582524	353	407	760
comp2250533_c0_seq1_m.39039	-0.250507	-0.252594	0.023978	0.0548017	0.0698976	0.0547264	360	401	761
comp1194322_c0_seq2_m.793	0.22571	0.223678	0.0213802	0.0558111	0.0649958	0.0591133	350	413	763
comp2277995_c0_seq1_m.87177	-0.296644	-0.287209	0.0273452	0.0498271	0.0767687	0.0497382	379	386	765
comp2260960_c0_seq2_m.53456	0.575724	0.570182	0.0448075	0.0361429	0.108527	0.025	440	328	768
comp2277312_c0_seq10_m.84862	0.279331	0.273139	0.0274976	0.0529662	0.0769932	0.0532995	380	393	773
comp2276741_c0_seq2_m.83166	0.240835	0.244959	0.0237433	0.0567387	0.0698976	0.0585366	364	409	773
comp2279615_c0_seq1_m.91158	-0.178217	-0.178436	0.0256702	0.0579652	0.0734223	0.0581114	372	406	778
gnl_Pdu_trscr_assembly_1_15590_m.29311	-0.460581	-0.456279	0.0416756	0.0419464	0.102884	0.0316092	431	348	779
comp2275701_c1_seq1_m.80440	0.355756	0.33672	0.0342725	0.0463806	0.0902623	0.0430108	404	375	779
comp2248226_c3_seq1_m.36365	0.265281	0.268708	0.0270657	0.0554492	0.0761851	0.0567901	378	403	781
comp2257131_c0_seq2_m.47590	0.338519	0.350007	0.0349015	0.0486776	0.0910176	0.0448549	407	377	784
gnl_Pdu_trscr_assembly_1_7274_m.39240	0.529816	0.507608	0.0465454	0.0398092	0.110299	0.0294985	449	337	786
comp2254426_c0_seq1_m.43954	-0.358019	-0.358898	0.0377229	0.048407	0.0964837	0.0449735	416	378	794
gnl_Pdu_trscr_assembly_1_19681_m.92605	0.311265	0.300102	0.0326859	0.0522293	0.0873814	0.0537084	398	396	794
comp2276593_c0_seq3_m.82791	0.237031	0.233225	0.0262603	0.0612415	0.074663	0.069378	375	419	794
comp2269906_c0_seq2_m.68214	0.25559	0.250121	0.0285269	0.0599408	0.0793268	0.0647482	382	417	799
comp2251806_c0_seq1_m.40480	0.20965	0.210976	0.026475	0.0663496	0.0749186	0.0794393	376	427	803
comp2270458_c0_seq1_m.69251	-0.317264	-0.31767	0.0352868	0.0528759	0.0915736	0.0534351	410	394	804
comp2273645_c0_seq11_m.75781	0.26549	0.27219	0.0295253	0.0584201	0.081209	0.0603865	389	416	805
comp2206512_c0_seq1_m.14012	0.254834	0.255554	0.0296788	0.0614211	0.081209	0.0692124	387	418	805
comp2247098_c0_seq1_m.35275	-0.523639	-0.523886	0.0517131	0.0424051	0.119097	0.03125	462	344	806
comp2278010_c1_seq9_m.87231	-0.322917	-0.338401	0.0375145	0.0533421	0.0961818	0.0530303	415	391	806
comp2274693_c0_seq1_m.78142	0.232858	0.228662	0.0286292	0.0649821	0.0793268	0.0776471	383	423	806
comp2277083_c0_seq3_m.84173	-0.290416	-0.285978	0.0337778	0.0569211	0.0894019	0.0583942	402	408	810
comp2275266_c0_seq21_m.79421	-0.236608	-0.239549	0.028557	0.0643393	0.0793268	0.0781991	384	426	810
comp2271944_c0_seq11_m.72172	0.27983	0.272383	0.033065	0.058812	0.0881733	0.060241	399	415	814
comp2250470_c0_seq1_m.38949	0.297877	0.292251	0.0348451	0.0562744	0.0910176	0.0588235	406	411	817
comp2253561_c0_seq1_m.42779	-0.298312	-0.307517	0.0345483	0.0559013	0.090764	0.0589681	405	412	817
comp2278031_c0_seq2_m.87291	0.221341	0.219177	0.0304414	0.0688524	0.0830505	0.0810185	390	429	819
comp2248254_c1_seq2_m.36433	0.492475	0.44643	0.0494657	0.0432321	0.115167	0.0337079	457	364	821
comp2272583_c0_seq2_m.73488	-0.189405	-0.188187	0.0296901	0.0722378	0.081209	0.0913242	388	435	823
comp2139380_c0_seq1_m.6935	0.348155	0.329617	0.0400232	0.0516776	0.0995976	0.0541237	427	399	826
comp2277005_c0_seq3_m.83943	0.353745	0.364039	0.0414039	0.0518731	0.102689	0.0539846	429	398	827
comp2273900_c0_seq1_m.76336	0.234877	0.238895	0.0326484	0.068297	0.0873814	0.0813953	397	431	828
comp2252186_c0_seq3_m.40915	0.384171	0.38012	0.0461608	0.0501823	0.109632	0.0494792	447	384	831
comp2261058_c0_seq1_m.53667	0.240688	0.243313	0.0335156	0.0678412	0.0890045	0.0815851	400	432	832
comp2251346_c0_seq1_m.39994	-0.264424	-0.267066	0.035938	0.0652491	0.0930367	0.0774648	411	422	833
comp2261047_c0_seq1_m.53653	-0.359745	-0.340342	0.0434712	0.0521391	0.105843	0.0538462	437	397	834
comp2272087_c1_seq4_m.72458	-0.181842	-0.182763	0.0306558	0.0731795	0.0834215	0.0977273	391	444	835
gnl_Pdu_trscr_assembly_1_15577_m.47320	0.212156	0.209448	0.0322602	0.0733618	0.0868984	0.0975057	395	443	838
comp2272876_c0_seq2_m.74167	0.406607	0.437561	0.0499395	0.0492547	0.115894	0.0472441	459	381	840
comp2276825_c0_seq1_m.83424	0.213254	0.210127	0.033544	0.0742086	0.0890045	0.0968468	401	440	841
comp2269593_c0_seq3_m.67692	0.200931	0.198928	0.0326717	0.0754539	0.0873814	0.100446	396	451	847
comp2268194_c0_seq1_m.65186	-0.259774	-0.265468	0.0391799	0.0684746	0.0987386	0.0812065	423	430	853
comp2262362_c0_seq1_m.55645	0.244991	0.249034	0.0389096	0.0721476	0.0983368	0.0915332	420	436	856
comp2239935_c0_seq1_m.28757	-0.204257	-0.205539	0.0341319	0.0777763	0.090115	0.105727	403	455	858
comp2275068_c1_seq1_m.78996	0.240373	0.234404	0.0393448	0.0738355	0.0987386	0.0970655	424	441	865
comp2272519_c1_seq3_m.73361	-0.260185	-0.251584	0.0427177	0.0712021	0.104732	0.0898618	434	434	868
comp1194343_c0_seq1_m.800	-0.169999	-0.170526	0.035207	0.0793383	0.0915736	0.111111	409	459	868
comp1971911_c0_seq1_m.3786	-0.340697	-0.358894	0.0485911	0.0589023	0.113379	0.0600962	455	414	869
comp2037149_c0_seq1_m.4742	0.25805	0.263152	0.0427197	0.0719605	0.104732	0.0917431	432	437	869
comp2277399_c0_seq2_m.85129	-0.220927	-0.225213	0.0388397	0.0796259	0.0983368	0.110629	421	457	878
comp2269029_c1_seq11_m.66661	-0.205745	-0.202979	0.0361138	0.0811128	0.0932648	0.114224	412	466	878
comp2228369_c0_seq1_m.21627	-0.227965	-0.228603	0.0397171	0.0779718	0.099433	0.105495	425	454	879
comp2276159_c1_seq5_m.81677	-0.31134	-0.30048	0.0485576	0.0646945	0.113379	0.0780142	456	425	881
comp2273519_c1_seq9_m.75533	0.3254	0.322628	0.0514113	0.0635836	0.118659	0.0736342	461	421	882
comp2270148_c0_seq3_m.68661	0.209188	0.212796	0.0378596	0.083078	0.0966011	0.119914	417	467	884
comp2266830_c0_seq2_m.62753	0.255226	0.249378	0.045894	0.0747716	0.109487	0.0986547	445	445	890
comp2269773_c0_seq6_m.68002	0.166519	0.167105	0.0382024	0.0866156	0.0972423	0.128421	418	473	891
tuba_m.92505	0.3999	0.367546	0.059697	0.0563647	0.131384	0.0586797	484	410	894
comp2269023_c0_seq1_m.66650	0.159671	0.159418	0.0399757	0.0833712	0.0995976	0.121795	428	468	896
comp2264796_c2_seq1_m.59361	0.257484	0.265813	0.0478501	0.0762895	0.112142	0.0997783	454	448	902
comp2266714_c1_seq1_m.62532	0.289902	0.288937	0.0523754	0.0714812	0.119844	0.091954	465	438	903
comp2275974_c0_seq18_m.81146	-0.579554	-0.483614	0.0810778	0.0502726	0.163508	0.0493506	530	383	913
comp2257395_c0_seq4_m.47951	-0.307708	-0.291924	0.059765	0.07261	0.131384	0.0933941	483	439	922
comp2272435_c0_seq2_m.73201	0.489823	0.428462	0.0771273	0.0552688	0.158118	0.057072	519	405	924
comp2269745_c1_seq1_m.67949	-0.292475	-0.302055	0.058517	0.0745836	0.129621	0.0988764	480	446	926
comp1961272_c0_seq1_m.3584	0.317248	0.295438	0.0696369	0.076485	0.146141	0.0995575	507	447	954
comp2278378_c0_seq4_m.88778	-0.475406	-0.412807	0.0847452	0.0620846	0.167289	0.0714286	539	420	959
comp2227117_c0_seq2_m.21047	0.44538	0.413508	0.0844988	0.0647848	0.167113	0.0778302	536	424	960
comp2269848_c0_seq4_m.68115	-0.394597	-0.356219	0.0813379	0.0696006	0.163508	0.0831409	528	433	961
comp2268942_c0_seq5_m.66483	-0.332847	-0.309241	0.0742597	0.075828	0.153422	0.1	515	449	964
comp2264121_c0_seq1_m.58459	0.496579	0.459132	0.096988	0.0656288	0.183584	0.0796253	563	428	991
comp2266233_c0_seq1_m.61658	0.409816	0.369369	0.0929433	0.0735404	0.178183	0.0972851	555	442	997

## Sheet: IM_NM vs M_NM_Male
	limma.logFC	rots.logFC	limma.pvalue	rots.pvalue	limma.adj.pvalue	rots.adj.pvalue	limma.rank	rots.rank	rank.sum
comp2242933_c0_seq1_m.31351	1.89332	1.90402	4.02e-07	9.02256e-05	0.0004276	0	1	1	2
comp2272698_c0_seq4_m.73763	1.12944	1.13088	1.22e-06	0.000270677	0.000650301	0	2	2	4
comp2247988_c0_seq1_m.36173	-1.07366	-1.07683	2.41e-06	0.000541353	0.000750671	0	3	3	6
gene17_m.92593	1.69181	1.704	2.82e-06	0.000180451	0.000750671	0	4	4	8
comp2256041_c0_seq1_m.46046	1.05864	1.05685	4.24e-06	0.000631579	0.000903258	0	5	5	10
comp2232805_c0_seq1_m.23974	0.796347	0.79749	7.6e-06	0.000992481	0.00090446	0	6	6	12
comp2232909_c0_seq1_m.24034	1.83782	1.83782	7.65e-06	0.000360902	0.00090446	0	7	7	14
comp2271994_c0_seq2_m.72269	-1.05767	-1.06223	7.39e-06	0.000721805	0.00090446	0	8	8	16
comp2272319_c0_seq24_m.72950	1.73809	1.75759	7.34e-06	0.000451128	0.00090446	0	9	9	18
comp2277282_c0_seq11_m.84762	0.897884	0.90044	9.29e-06	0.00108271	0.000988656	0	10	10	20
gnl_Pdu_trscr_assembly_1_5530_m.58454	-0.738467	-0.738789	1.04e-05	0.00117293	0.00100963	0	11	11	22
comp2262137_c0_seq4_m.55246	-1.15291	-1.14645	1.31e-05	0.000902256	0.00116125	0	12	12	24
comp2278077_c0_seq3_m.87468	1.01938	1.01328	1.96e-05	0.00126316	0.00160451	0	13	13	26
comp2262137_c0_seq3_m.92268	-1.67268	-1.68811	2.86e-05	0.00081203	0.00217735	0	14	14	28
comp2254641_c1_seq1_m.44200	-0.69213	-0.693148	3.09e-05	0.00162406	0.00219458	0	15	15	30
comp2278062_c0_seq4_m.87412	0.797244	0.79463	3.4e-05	0.00144361	0.00225832	0	16	16	32
comp2275107_c0_seq4_m.79080	-0.56322	-0.562888	3.73e-05	0.00171429	0.00233501	0	17	17	34
comp2276768_c0_seq2_m.83249	0.783335	0.788649	3.98e-05	0.00180451	0.00235122	0	18	18	36
comp2263822_c0_seq1_m.57945	0.709028	0.710644	4.56e-05	0.00189474	0.00255079	0	19	19	38
comp2266280_c0_seq1_m.61789	0.704036	0.701146	4.79e-05	0.00207519	0.00255079	0	20	20	40
comp2234282_c0_seq1_m.24908	0.943514	0.939974	5.39e-05	0.00153383	0.00273275	0	21	21	42
comp2275110_c1_seq5_m.79090	0.795402	0.801831	5.95e-05	0.00198496	0.00287533	0	22	22	44
comp2254520_c0_seq1_m.44059	-0.614514	-0.616049	6.66e-05	0.0028844	0.00297467	0	23	23	46
comp2274581_c1_seq21_m.92631	-0.646744	-0.650053	7.27e-05	0.00306485	0.00297467	0	24	24	48
comp2275841_c0_seq1_m.80783	-0.712185	-0.717115	7.22e-05	0.00270395	0.00297467	0	25	25	50
gnl_Pdu_trscr_assembly_1_16296_m.13041	-0.71172	-0.714114	7.23e-05	0.00279417	0.00297467	0	26	26	52
comp2256095_c0_seq1_m.46136	-0.609483	-0.611907	8.52e-05	0.00342575	0.00302167	0	27	27	54
comp2261623_c0_seq1_m.54431	-0.668013	-0.667211	8.7e-05	0.0032453	0.00302167	0	28	28	56
comp2272233_c0_seq1_m.72760	-0.542808	-0.544217	8.78e-05	0.00380169	0.00302167	0	29	29	58
comp2272961_c0_seq1_m.74370	0.79087	0.794006	7.98e-05	0.00234305	0.00302167	0	30	30	60
comp2277945_c0_seq2_m.86985	-1.13239	-1.11158	8.8e-05	0.00135338	0.00302167	0	31	31	62
comp2276277_c0_seq18_m.81972	0.629074	0.628102	9.81e-05	0.00389192	0.00326246	0	32	32	64
comp2265897_c0_seq5_m.61166	0.716178	0.719022	0.000114935	0.00333553	0.00370578	0	33	33	66
comp2254167_c0_seq1_m.43587	0.722696	0.724563	0.00012617	0.00371147	0.00372903	0	34	34	68
comp2266507_c0_seq10_m.62138	-0.52171	-0.521889	0.000123649	0.00434023	0.00372903	0	35	35	70
comp2275822_c0_seq10_m.80745	-0.817844	-0.823206	0.000125668	0.00297462	0.00372903	0	36	36	72
comp2248821_c1_seq2_m.37050	-0.520932	-0.522039	0.000146516	0.00479135	0.00417697	0	37	37	74
comp2252285_c0_seq2_m.41107	-0.531751	-0.53114	0.000149178	0.00488158	0.00417697	0	38	38	76
comp2243258_c0_seq1_m.31584	-0.652898	-0.647572	0.000172642	0.00443045	0.00448026	0	39	39	78
comp2267732_c0_seq2_m.64331	-0.60593	-0.604653	0.000172178	0.00470113	0.00448026	0	40	40	80
comp2269185_c0_seq2_m.66963	-0.596634	-0.597596	0.000166219	0.0046109	0.00448026	0	41	41	82
comp2237468_c0_seq1_m.27022	-1.11126	-1.13734	0.000179948	0.00216541	0.00455869	0	42	42	84
comp2257905_c0_seq1_m.48664	-0.606316	-0.611491	0.000196467	0.00506203	0.00486142	0	43	43	86
comp2204672_c0_seq1_m.13711	-0.512766	-0.512602	0.000215206	0.00542011	0.0049778	0	44	44	88
comp2261399_c0_seq2_m.54155	-1.07067	-1.09162	0.000209693	0.00261372	0.0049778	0	45	45	90
comp2274541_c0_seq1_m.77862	-1.11764	-1.1363	0.000214137	0.00243327	0.0049778	0	46	46	92
comp2272087_c1_seq4_m.72458	-0.449689	-0.450435	0.000240649	0.00560056	0.00536158	0	47	47	94
comp2276498_c2_seq1_m.82546	-0.845512	-0.84237	0.000241876	0.00398214	0.00536158	0	48	48	96
comp2264838_c0_seq3_m.59436	-1.04027	-1.06571	0.000260481	0.00315508	0.00565616	0	49	49	98
comp1958245_c0_seq1_m.3536	-0.555821	-0.552485	0.000285235	0.00569079	0.00595079	0	50	50	100
comp2276426_c0_seq2_m.82339	-0.718789	-0.721772	0.000281844	0.0049718	0.00595079	0	51	51	102
comp2254477_c0_seq1_m.44015	0.483375	0.485851	0.000308651	0.00623214	0.00631091	0	52	52	104
comp2277815_c1_seq2_m.86535	1.00454	0.984723	0.000314359	0.00362124	0.00631091	0	53	53	106
comp2268964_c0_seq1_m.66515	-0.448907	-0.449158	0.000320887	0.00686372	0.00632267	0	54	54	108
gnl_Pdu_trscr_assembly_1_16061_m.43221	-0.616875	-0.621642	0.000332434	0.00551034	0.00643108	0	55	55	110
comp2263612_c1_seq1_m.57550	-0.413684	-0.414028	0.000349286	0.00695395	0.0065037	0	56	56	112
comp2263873_c0_seq9_m.58029	-1.32826	-1.29177	0.000354525	0.0025235	0.0065037	0	57	57	114
comp2278422_c0_seq1_m.89011	0.517945	0.515032	0.000345337	0.00650282	0.0065037	0	58	58	116
comp2272547_c0_seq4_m.73421	-0.539589	-0.539844	0.00036448	0.00632237	0.00653411	0	59	59	118
comp2281676_c0_seq1_m.91255	0.889531	0.879202	0.000368465	0.00416259	0.00653411	0	60	60	120
comp2256220_c0_seq1_m.46316	-0.687719	-0.681342	0.000390915	0.00532989	0.0067086	0	61	61	122
comp2265656_c0_seq3_m.60780	-0.491439	-0.488138	0.000389266	0.0072218	0.0067086	0	62	62	124
comp1916779_c0_seq1_m.2944	-0.438203	-0.439908	0.000414478	0.00776316	0.00700008	0	63	63	126
comp2270876_c0_seq2_m.70018	-0.596318	-0.596467	0.000432622	0.00587124	0.00715802	0	64	64	128
comp2271350_c0_seq18_m.70898	0.543588	0.540794	0.00043771	0.00713158	0.00715802	0	65	65	130
comp2275662_c1_seq10_m.80344	-0.403977	-0.402963	0.000444012	0.00785338	0.00715802	0	66	66	132
comp2246514_c1_seq1_m.34691	-0.500838	-0.50317	0.000452802	0.00767293	0.00719076	0	67	67	134
comp2278587_c0_seq14_m.90327	-0.521763	-0.518573	0.000472853	0.00758271	0.00739876	0	68	68	136
comp2263277_c0_seq1_m.57091	-0.453151	-0.454662	0.000487952	0.00803383	0.00752436	0	69	69	138
comp2275270_c0_seq2_m.79424	0.403657	0.402769	0.000519159	0.00831861	0.00778007	0	70	70	140
comp2277680_c0_seq25_m.86056	-0.631264	-0.622846	0.000516468	0.00614192	0.00778007	0	71	71	142
comp2273038_c0_seq3_m.74522	-0.61841	-0.62672	0.000527676	0.00668327	0.00779788	0	72	72	144
comp1781461_c0_seq1_m.2253	-0.585235	-0.58221	0.000582031	0.00749248	0.0084833	0	73	73	146
comp2261368_c1_seq1_m.54120	-0.408814	-0.410532	0.000611927	0.00903571	0.00879851	0	74	74	148
comp1945561_c0_seq2_m.3380	-0.687002	-0.696775	0.000683628	0.00659305	0.00969841	0	75	75	150
comp2261971_c0_seq1_m.55022	-0.514822	-0.516786	0.000773997	0.00858929	0.0104245	0	76	76	152
comp2275445_c0_seq2_m.79869	-0.501952	-0.504638	0.000752176	0.00867951	0.0104245	0	77	77	154
comp2276035_c1_seq16_m.81307	-0.498989	-0.500123	0.000755803	0.00876974	0.0104245	0	78	78	156
comp2279523_c0_seq1_m.91136	-0.462464	-0.4649	0.000768986	0.00939662	0.0104245	0	79	79	158
comp2254675_c0_seq1_m.44244	-0.375277	-0.375396	0.000806452	0.0103882	0.0104816	0	80	80	160
comp2271649_c0_seq1_m.71599	-0.66394	-0.676051	0.000793714	0.00740226	0.0104816	0	81	81	162
isotig10568_m.92324	-1.24409	-1.26921	0.000807795	0.00407237	0.0104816	0	82	82	164
comp2263115_c0_seq2_m.56831	0.358841	0.359278	0.000868167	0.0108393	0.0106176	0	83	83	166
comp2264302_c0_seq2_m.58699	-0.686407	-0.700109	0.0008476	0.00731203	0.0106176	0	84	84	168
comp2265768_c0_seq2_m.60943	-0.732474	-0.745097	0.000850755	0.0067735	0.0106176	0	85	85	170
comp2276442_c0_seq1_m.82386	-0.406232	-0.407691	0.000862515	0.0110197	0.0106176	0	86	86	172
comp2277088_c0_seq32_m.84183	-0.469037	-0.468063	0.000851891	0.00966729	0.0106176	0	87	87	174
comp2268869_c0_seq6_m.66344	-0.775026	-0.756298	0.000885812	0.00596147	0.0107103	0	88	88	176
comp2226643_c0_seq1_m.20830	-0.403368	-0.405398	0.000962159	0.011922	0.0107603	0	89	89	178
comp2239691_c0_seq1_m.28548	-0.81017	-0.806964	0.000993972	0.00605169	0.0107603	0	90	90	180
comp2252847_c0_seq1_m.41763	0.410761	0.408207	0.000937502	0.0114709	0.0107603	0	91	91	182
comp2262465_c0_seq5_m.55795	-0.996907	-1.02575	0.000951245	0.00523966	0.0107603	0	92	92	184
comp2273257_c0_seq9_m.74986	1.18683	1.19761	0.000904686	0.00452068	0.0107603	0	93	93	186
comp2274783_c0_seq9_m.78326	-0.49142	-0.492139	0.00100119	0.0102077	0.0107603	0	94	94	188
comp2275523_c0_seq29_m.80039	0.438158	0.434454	0.000925353	0.0109295	0.0107603	0	95	95	190
comp2276461_c0_seq7_m.82444	-0.463998	-0.466062	0.000963842	0.0104784	0.0107603	0	96	96	192
comp2277815_c0_seq5_m.86532	0.791691	0.813585	0.000986506	0.00641259	0.0107603	0	97	97	194
comp2277972_c0_seq17_m.87106	0.446791	0.443951	0.000993496	0.01111	0.0107603	0	98	98	196
gnl_Pdu_trscr_assembly_1_1514_m.69841	0.347052	0.347563	0.000917518	0.0107491	0.0107603	0	99	99	198
comp2263291_c0_seq2_m.57114	0.531518	0.537719	0.0010343	0.00930639	0.0108128	0	100	100	200
comp2268892_c0_seq1_m.66381	-0.898743	-0.930017	0.00101809	0.00578102	0.0108128	0	101	101	202
comp2278509_c0_seq8_m.89637	-0.374618	-0.372825	0.00103656	0.0123882	0.0108128	0	102	102	204
comp2278366_c0_seq5_m.88731	-0.448054	-0.446432	0.00106231	0.0115611	0.0109738	0	103	103	206
comp2266171_c0_seq1_m.61557	0.547314	0.549194	0.00109955	0.00921617	0.0111421	0	104	104	208
comp2268906_c0_seq4_m.66401	-0.346539	-0.34557	0.00109718	0.0124784	0.0111421	0	105	105	210
comp2277908_c1_seq11_m.86865	0.513021	0.513975	0.00118009	0.0102979	0.0118454	0	106	106	212
comp2278554_c0_seq4_m.90013	-0.582073	-0.584223	0.00122703	0.00912594	0.0122015	0	107	107	214
comp2221095_c0_seq1_m.18558	-0.486516	-0.488764	0.0012824	0.0116513	0.012634	0	108	108	216
comp2277869_c0_seq29_m.86707	0.434018	0.432672	0.00129492	0.0127491	0.0126404	0	109	109	218
comp2254470_c0_seq1_m.44006	-0.376871	-0.377414	0.00132222	0.0139164	0.0127632	0	110	110	220
comp2266692_c0_seq1_m.62504	0.572077	0.564683	0.00135549	0.00975752	0.0127632	0	111	111	222
comp2278474_c0_seq1_m.89294	-0.528909	-0.52589	0.00133251	0.0106588	0.0127632	0	112	112	224
gnl_Pdu_trscr_assembly_1_14638_m.60097	-0.496873	-0.503501	0.00134678	0.0117415	0.0127632	0	113	113	226
comp2273017_c0_seq1_m.74484	-0.363908	-0.364694	0.00140734	0.0143647	0.0131352	0	114	114	228
comp2269230_c0_seq2_m.67055	-0.495247	-0.495881	0.00147557	0.0122077	0.0136522	0	115	115	230
comp2242282_c0_seq1_m.30761	-0.461442	-0.464936	0.00148951	0.0128393	0.0136624	0	116	116	232
comp2258554_c0_seq1_m.49568	-0.470062	-0.465704	0.0015042	0.0126588	0.0136792	0	117	117	234
comp2279567_c0_seq1_m.91146	0.567143	0.565611	0.00155986	0.0105686	0.0140652	0	118	118	236
comp2269060_c1_seq1_m.66719	-0.791496	-0.814531	0.00161406	0.00794361	0.0144316	0	119	119	238
comp2272254_c0_seq4_m.72822	-0.683299	-0.702386	0.00167929	0.00894549	0.0148897	0	120	120	240
comp2224448_c0_seq1_m.19874	-0.293535	-0.293636	0.0017397	0.0125686	0.0152978	0	121	121	242
comp2269580_c0_seq1_m.67656	0.44533	0.445147	0.00184293	0.0142744	0.0156273	0	123	122	245
comp2276523_c0_seq2_m.82609	0.393633	0.397506	0.00179844	0.0153722	0.0156273	0	124	123	247
comp2277933_c1_seq7_m.86947	-0.660859	-0.659407	0.00183356	0.00957707	0.0156273	0	125	124	249
comp2278054_c0_seq40_m.87392	-0.559972	-0.548184	0.0018091	0.0118318	0.0156273	0	126	125	251
comp2276750_c0_seq1_m.83194	0.579218	0.56883	0.00187163	0.0113806	0.0156804	0	127	126	253
comp2261018_c0_seq2_m.53614	-0.415438	-0.417657	0.00191859	0.0151015	0.0157621	0	129	127	256
comp2266503_c0_seq6_m.62129	-0.506599	-0.513147	0.00197539	0.0132904	0.0159228	0	132	128	260
comp2263896_c0_seq3_m.58065	0.432135	0.436179	0.00204213	0.0149211	0.0160863	0	134	129	263
comp2265326_c0_seq3_m.60204	-0.688111	-0.679535	0.00216598	0.00984774	0.0160863	0	135	130	265
comp2271225_c0_seq5_m.70641	-0.78663	-0.792118	0.00202059	0.00840883	0.0160863	0	136	131	267
comp2275312_c0_seq8_m.79518	-0.533303	-0.539043	0.00214459	0.0130197	0.0160863	0	137	132	269
comp2276648_c1_seq1_m.82962	-0.439507	-0.443318	0.00219221	0.0151917	0.0160863	0	138	133	271
comp2277605_c1_seq7_m.85828	0.473198	0.466812	0.00215813	0.0144549	0.0160863	0	140	134	274
comp2278333_c0_seq10_m.88591	-0.426837	-0.432644	0.00208774	0.0154624	0.0160863	0	141	135	276
comp2278630_c0_seq8_m.90809	-0.463368	-0.463383	0.00214196	0.0146504	0.0160863	0	143	136	279
gnl_Pdu_trscr_assembly_1_326_m.78835	-0.436072	-0.434054	0.00218868	0.0155526	0.0160863	0	145	137	282
comp2277005_c0_seq3_m.83943	0.456824	0.454669	0.00224596	0.0148308	0.0161466	0	147	138	285
comp2277132_c1_seq1_m.84335	0.52735	0.516172	0.00232593	0.0135555	0.0166093	0	149	139	288
comp1965369_c0_seq1_contamination_m.3664	0.654374	0.641594	0.0025282	0.0112002	0.0173768	0	153	140	293
comp2273417_c0_seq5_m.75297	-0.561478	-0.573124	0.0025314	0.01311	0.0173768	0	155	141	296
comp2275542_c0_seq9_m.80087	-0.567315	-0.572655	0.00260234	0.0132002	0.0176362	0	157	142	299
comp2269060_c0_seq1_m.66718	-0.605836	-0.625553	0.00289562	0.0129295	0.0182562	0	164	143	307
comp2274474_c0_seq5_m.77718	-0.638221	-0.659829	0.00284179	0.0122979	0.0182562	0	166	144	310
comp2276871_c0_seq8_m.83582	0.567	0.551633	0.00302091	0.0140066	0.0187967	0	171	145	316
comp2280591_c0_seq1_m.91233	0.952591	0.915038	0.00308383	0.00849906	0.0190767	0	172	146	318
comp2277203_c0_seq4_m.84565	0.516146	0.504768	0.00311864	0.0150113	0.0191805	0	173	147	320
comp2263667_c0_seq1_m.57601	0.592701	0.589297	0.00329423	0.0138261	0.0194865	0	178	148	326
comp2268473_c1_seq1_m.65668	0.765517	0.753597	0.00361424	0.0112904	0.0207476	0	185	149	334
comp2269532_c0_seq13_m.67583	-0.550279	-0.550559	0.0037529	0.015282	0.0212398	0	188	150	338
comp2261379_c0_seq1_m.54133	-0.744536	-0.731569	0.00377532	0.0120122	0.0212537	0	189	151	340
comp1194362_c0_seq2_m.804	0.321488	0.320436	0.00289972	0.0210094	0.0182562	0.00478469	161	182	343
comp1194106_c0_seq1_m.742	0.303415	0.302175	0.0028979	0.0208289	0.0182562	0.00483092	160	184	344
comp1244797_c0_seq1_m.1278	0.323555	0.325812	0.00328935	0.0223637	0.0194865	0.00452489	175	170	345
comp2139115_c0_seq1_m.6894	-0.908813	-0.859019	0.00396352	0.00993797	0.0217135	0	194	152	346
comp2202068_c0_seq1_m.13304	-0.3107	-0.310098	0.00366515	0.0233562	0.0208541	0.00431034	187	159	346
comp2263661_c0_seq1_m.57595	-0.299902	-0.300918	0.00318613	0.0220959	0.019483	0.00456621	174	172	346
comp2276936_c0_seq3_m.83786	0.951276	1.005	0.00397944	0.00948684	0.0217135	0	195	153	348
comp2254496_c0_seq2_m.44030	-0.312278	-0.311046	0.00338803	0.0227246	0.0196987	0.00444444	182	166	348
comp1926910_c0_seq1_m.3122	-0.314527	-0.313671	0.00211474	0.0177406	0.0160863	0.00568182	133	215	348
comp2277114_c1_seq1_m.84278	0.335124	0.334877	0.00216392	0.0181917	0.0160863	0.00552486	139	210	349
comp2269321_c1_seq1_m.67212	-0.363217	-0.365966	0.0018506	0.0163665	0.0156273	0.00609756	122	227	349
comp2264743_c0_seq3_m.59295	-0.325344	-0.326182	0.00196182	0.0170883	0.0159228	0.00581395	131	219	350
comp2260103_c0_seq1_m.51994	-0.338944	-0.340678	0.00286146	0.0203788	0.0182562	0.00492611	163	188	351
comp2271425_c0_seq4_m.71034	-0.329122	-0.327232	0.00263466	0.0198374	0.0177423	0.00507614	158	194	352
comp2252506_c0_seq1_m.41372	-0.346651	-0.345011	0.0019072	0.0166372	0.0157621	0.00598802	128	224	352
comp2232290_c0_seq2_m.23637	-0.940415	-0.882936	0.00426071	0.0100282	0.022667	0	200	154	354
comp2189372_c0_seq1_m.11219	-0.301785	-0.30273	0.00259198	0.0194765	0.0176362	0.00518135	156	198	354
gnl_Pdu_trscr_assembly_1_7327_m.81715	-0.317261	-0.318805	0.0023943	0.0188233	0.0168711	0.00531915	151	203	354
gnl_Pdu_trscr_assembly_1_998_m.15062	-0.281731	-0.282574	0.0033019	0.0218252	0.0194865	0.00462963	181	175	356
comp2271539_c0_seq2_m.71326	0.29888	0.300034	0.00278178	0.0201081	0.0182562	0.005	165	191	356
comp2273647_c0_seq2_m.75785	-0.670721	-0.643471	0.00434185	0.0137359	0.0228699	0	202	155	357
comp2279536_c0_seq1_m.91140	-0.339545	-0.342405	0.00337117	0.0219154	0.0196987	0.00460829	183	174	357
comp2261428_c0_seq1_m.54200	-0.279517	-0.279212	0.00324242	0.0213741	0.0194865	0.00473934	177	180	357
comp2276413_c0_seq21_m.82313	-0.342986	-0.344536	0.00288135	0.0202885	0.0182562	0.0049505	168	189	357
comp2272118_c0_seq11_m.72524	0.295972	0.295462	0.00250957	0.0187331	0.0173768	0.00534759	154	204	358
comp2276159_c1_seq5_m.81677	-0.344753	-0.34707	0.00285036	0.0200179	0.0182562	0.00502513	167	192	359
comp2257939_c0_seq1_m.48703	-0.361189	-0.362986	0.00241341	0.0184624	0.0168939	0.00543478	152	207	359
gnl_Pdu_trscr_assembly_1_20792_m.71829	0.336424	0.338247	0.00206535	0.0176504	0.0160863	0.00571429	144	216	360
comp2269611_c0_seq1_m.67728	0.36378	0.361032	0.00415094	0.0228148	0.0224193	0.00442478	197	165	362
comp2278536_c1_seq38_m.89884	-0.390144	-0.386144	0.00192582	0.0159154	0.0157621	0.00628931	130	232	362
comp2252059_c0_seq1_m.40786	0.360601	0.357221	0.00439815	0.023266	0.0229394	0.004329	203	160	363
comp2275358_c0_seq1_m.79627	-0.364053	-0.367349	0.00331151	0.0209192	0.0194865	0.00480769	180	183	363
comp2278589_c0_seq3_m.90346	-0.385092	-0.385709	0.00239221	0.0178308	0.0168711	0.00564972	150	214	364
comp2269171_c0_seq3_m.66933	0.659735	0.643522	0.00456109	0.0141842	0.0232201	0	209	156	365
comp2231610_c0_seq1_m.23229	0.390161	0.387638	0.00224092	0.0169981	0.0161466	0.00584795	146	220	366
comp2224014_c0_seq1_m.19704	0.377565	0.383257	0.00389028	0.021735	0.021521	0.00465116	191	176	367
comp2278362_c0_seq1_m.88712	-0.381301	-0.383792	0.00208291	0.016547	0.0160863	0.0060241	142	225	367
comp2277722_c0_seq17_m.86189	-0.370101	-0.373338	0.00285831	0.0193863	0.0182562	0.00520833	169	199	368
comp2270220_c0_seq1_m.68776	0.717848	0.738806	0.00491403	0.0136457	0.0243187	0	214	157	371
comp2229729_c0_seq1_m.22264	0.38498	0.388134	0.00347498	0.020469	0.0200945	0.00490196	184	187	371
gnl_Pdu_trscr_assembly_1_9334_m.28552	-0.394302	-0.389637	0.0022328	0.0167274	0.0161466	0.00595238	148	223	371
comp2256245_c0_seq1_m.46340	-0.415767	-0.421128	0.0027796	0.0179211	0.0182562	0.00561798	162	213	375
comp2206512_c0_seq1_m.14012	0.416858	0.417749	0.00269954	0.0174549	0.0180648	0.00574713	159	217	376
comp2254568_c0_seq1_m.44123	-0.412255	-0.415884	0.00330306	0.0190038	0.0194865	0.00526316	176	201	377
comp2269627_c0_seq2_m.67749	0.264836	0.264718	0.0033149	0.019094	0.0194865	0.0052356	179	200	379
comp2247098_c0_seq1_m.35275	-0.675757	-0.701997	0.00531347	0.0147406	0.025239	0	224	158	382
comp2271871_c0_seq8_m.72023	0.419867	0.41159	0.00468865	0.0215545	0.0236432	0.00469484	211	178	389
comp2275714_c2_seq1_m.80469	0.24681	0.24692	0.00451892	0.0210996	0.0231945	0.0047619	208	181	389
comp2278376_c0_seq1_m.88768	-0.416944	-0.415378	0.00516443	0.0225442	0.0249128	0.0044843	223	168	391
comp2270404_c0_seq3_m.69137	-0.442014	-0.451302	0.00362694	0.0186429	0.0207476	0.00537634	186	205	391
comp2214845_c0_seq1_m.16111	0.453476	0.445962	0.0030176	0.0168177	0.0187967	0.00591716	170	222	392
comp2245721_c0_seq1_m.33844	0.426782	0.428631	0.00621772	0.0231758	0.0277968	0.00434783	238	161	399
comp2243933_c0_seq1_m.32211	-0.439367	-0.448946	0.00579445	0.0224539	0.0265746	0.0045045	232	169	401
comp2279445_c0_seq1_m.91120	-0.446838	-0.435654	0.00610917	0.0226344	0.0274268	0.00446429	237	167	404
comp2273628_c0_seq6_m.75728	-0.453473	-0.465776	0.00570385	0.0216447	0.0262723	0.0046729	231	177	408
comp2276940_c0_seq2_m.83802	-0.462677	-0.471546	0.0069914	0.0229051	0.0298819	0.00440529	249	164	413
comp2275616_c0_seq2_m.80253	-0.471671	-0.477955	0.00550799	0.0206494	0.0255917	0.00485437	228	185	413
comp2267634_c0_seq2_m.64174	-0.488794	-0.485473	0.00443938	0.0183722	0.0230414	0.00546448	205	208	413
comp2270797_c0_seq10_m.69872	-0.50657	-0.515623	0.00453427	0.0181015	0.0231945	0.00555556	207	211	418
comp2267209_c0_seq1_m.63399	-0.528603	-0.519457	0.00379651	0.0160056	0.0212605	0.00625	190	231	421
comp2253149_c0_seq1_m.42245	0.497886	0.489565	0.00679115	0.0214643	0.0293731	0.00471698	246	179	425
comp1226347_c0_seq1_m.1231	0.291764	0.292433	0.00400328	0.0244521	0.0217321	0.0083682	196	233	429
comp2272519_c1_seq3_m.73361	-0.304941	-0.303119	0.00388808	0.0240075	0.021521	0.00847458	193	236	429
comp2254394_c0_seq2_m.43926	-0.311662	-0.312774	0.00390372	0.0239173	0.021521	0.00851064	192	237	429
comp2263691_c0_seq2_m.57661	-0.52848	-0.525332	0.00539576	0.0185526	0.025516	0.00540541	225	206	431
comp2264621_c0_seq1_m.59138	-0.519703	-0.526288	0.00556169	0.0189135	0.0257289	0.00529101	230	202	432
comp2275905_c0_seq4_m.80965	0.526755	0.546632	0.00705146	0.0205592	0.0298914	0.00487805	250	186	436
comp2277313_c0_seq3_m.84866	0.5162	0.500354	0.00643679	0.0199276	0.0281841	0.00505051	243	193	436
comp2252746_c0_seq1_m.41651	-0.343027	-0.34725	0.00421822	0.0236494	0.0225537	0.00858369	198	239	437
comp2267172_c0_seq1_m.63318	0.342561	0.338865	0.0045012	0.0243618	0.0231945	0.00840336	206	234	440
comp2269297_c0_seq2_m.67181	0.554776	0.565169	0.00588976	0.018282	0.0267808	0.00549451	234	209	443
comp2275674_c1_seq1_m.80370	-0.583882	-0.604915	0.00484826	0.0160959	0.0242185	0.00621118	213	230	443
comp2262317_c0_seq2_m.55577	0.583973	0.587778	0.00518868	0.0164568	0.0249128	0.00606061	219	226	445
gnl_Pdu_trscr_assembly_1_4228_m.63259	-0.550122	-0.566382	0.00704945	0.0197472	0.0298914	0.00510204	251	195	446
comp2253856_c0_seq1_m.43254	-0.312782	-0.315564	0.00429694	0.0248205	0.022746	0.0123967	201	247	448
comp2261876_c0_seq1_m.54865	-0.318549	-0.31557	0.00421237	0.02464	0.0225537	0.0125	199	249	448
comp2263346_c1_seq31_m.57192	-0.312492	-0.31281	0.00459628	0.0253618	0.0232878	0.0120968	210	241	451
comp2268857_c0_seq2_m.66328	-0.322432	-0.325489	0.00439331	0.0247303	0.0229394	0.0124481	204	248	452
comp2265883_c1_seq1_m.61140	0.565759	0.540053	0.0107641	0.0229953	0.0392227	0.00438596	291	163	454
comp2272495_c0_seq1_m.73308	0.63744	0.610008	0.00591604	0.0162763	0.0267858	0.00613497	235	228	463
comp2239022_c0_seq1_m.28102	0.605738	0.617525	0.00913155	0.0201983	0.0350757	0.00497512	277	190	467
comp2248226_c3_seq1_m.36365	0.300479	0.299898	0.00522139	0.0274859	0.0249128	0.013308	218	252	470
comp2277977_c1_seq3_m.87126	-0.273646	-0.274526	0.0049854	0.0272162	0.0244445	0.01341	216	254	470
comp2272724_c0_seq1_m.73818	-0.278224	-0.277379	0.00489711	0.0270357	0.0243187	0.0135135	215	256	471
comp1335339_c0_seq2_m.1954	0.301848	0.299516	0.00474662	0.0262829	0.0238227	0.0137795	212	261	473
comp2271257_c1_seq1_m.70699	-0.409525	-0.399507	0.00608303	0.0238271	0.0274252	0.00854701	236	238	474
comp2004487_c0_seq1_m.4269	0.66736	0.668168	0.0146229	0.0230855	0.0493931	0.00436681	315	162	477
comp2278405_c0_seq22_m.88893	-0.653176	-0.61308	0.00978833	0.019657	0.0368014	0.00512821	283	196	479
comp2262360_c0_seq1_m.55644	-0.669814	-0.701754	0.00824716	0.0180113	0.0327962	0.00558659	267	212	479
comp2280178_c0_seq1_m.91219	-0.699599	-0.667468	0.00795048	0.0169079	0.0324111	0.00588235	261	221	482
gnl_Pdu_trscr_assembly_1_16681_m.81096	-0.255714	-0.255083	0.00496809	0.02564	0.0244445	0.014	217	265	482
comp2276302_c0_seq1_m.82036	0.326794	0.323605	0.00545444	0.0269455	0.0255662	0.0135659	227	257	484
comp2271535_c0_seq1_m.71319	0.330455	0.327209	0.00514833	0.0261927	0.0249128	0.013834	222	262	484
comp2271413_c1_seq5_m.70995	-0.333749	-0.337732	0.00518946	0.0259248	0.0249128	0.0139442	221	264	485
comp2258619_c0_seq2_m.49656	0.337933	0.340814	0.00586986	0.0271259	0.0267808	0.0134615	233	255	488
comp2269326_c0_seq2_m.67220	-0.288911	-0.291017	0.00521373	0.028032	0.0249128	0.0149813	220	268	488
comp2277933_c1_seq7_m.86946	-0.68828	-0.640646	0.0107451	0.0195667	0.0392227	0.00515464	292	197	489
comp2201786_c0_seq1_m.13247	0.741505	0.679174	0.0154929	0.0221861	0.0515581	0.00454545	319	171	490
comp2274446_c0_seq19_m.77642	-0.295559	-0.293431	0.00544614	0.0282096	0.0255662	0.0149254	226	267	493
comp2263768_c0_seq2_m.57843	-0.412489	-0.423263	0.00760735	0.0254521	0.031867	0.0120482	254	240	494
comp2278031_c0_seq2_m.87291	0.309602	0.307118	0.0054969	0.0279417	0.0255917	0.0150376	229	269	498
comp2254426_c0_seq1_m.43954	-0.425572	-0.434169	0.00753641	0.0249107	0.0316946	0.0123457	253	246	499
comp1888169_c0_seq2_m.2479	0.769989	0.712902	0.0163196	0.0220056	0.052939	0.00458716	327	173	500
comp2248808_c0_seq2_m.37043	-0.851181	-0.904305	0.00998252	0.0161861	0.0372681	0.00617284	284	229	513
comp2273865_c0_seq2_m.76255	0.44238	0.439861	0.00842401	0.0250912	0.0331605	0.0122449	270	244	514
comp2274748_c1_seq11_m.78259	-0.266351	-0.266311	0.00633632	0.0305132	0.0281384	0.0158451	239	279	518
comp2276741_c0_seq2_m.83166	0.250345	0.251465	0.00699304	0.0313186	0.0298819	0.0155709	248	274	522
comp2265386_c0_seq2_m.60299	0.517265	0.539267	0.0104211	0.0242716	0.0385003	0.00843882	288	235	523
comp2272863_c1_seq5_m.74143	-0.246466	-0.247423	0.00710962	0.0314991	0.0300184	0.0154639	252	272	524
comp2266801_c0_seq2_m.62707	0.301582	0.303335	0.00673942	0.0302415	0.0292683	0.0159011	245	280	525
comp2278363_c0_seq7_m.88713	-0.302449	-0.304559	0.00660256	0.0299737	0.0287915	0.0160142	244	282	526
comp2265589_c0_seq2_m.60673	0.245096	0.245805	0.0064007	0.0295977	0.0281841	0.0161871	241	285	526
comp2276491_c0_seq8_m.82522	0.246256	0.246998	0.006347	0.0295075	0.0281384	0.0162455	240	286	526
comp2253516_c0_seq4_m.42708	-0.972817	-0.886812	0.0133633	0.0172754	0.0458664	0.00578035	310	218	528
comp2256770_c0_seq1_m.46959	0.373188	0.37262	0.00802398	0.0282998	0.0325859	0.0148699	262	266	528
comp2265735_c0_seq4_m.60895	-0.243351	-0.242763	0.00642345	0.0293271	0.0281841	0.0163636	242	288	530
comp2241424_c0_seq3_m.29932	-0.423818	-0.4212	0.00894446	0.0266607	0.0346069	0.0136187	275	258	533
comp2263347_c0_seq2_m.57195	0.327383	0.327642	0.00785483	0.0306034	0.0322685	0.0157895	256	278	534
comp2274043_c0_seq7_m.76739	-0.429697	-0.440504	0.00867272	0.026015	0.0339256	0.0138889	272	263	535
comp2272299_c0_seq11_m.72914	-0.431904	-0.446124	0.0100865	0.0275761	0.0375247	0.0132576	286	251	537
comp2260797_c0_seq1_m.53088	0.233317	0.233688	0.00693489	0.0289492	0.0298734	0.0165441	247	291	538
comp2278471_c0_seq8_m.89279	0.327889	0.328295	0.00826069	0.0309615	0.0327962	0.0156794	268	276	544
comp2271319_c0_seq2_m.70822	0.346701	0.35003	0.00808146	0.0298835	0.032588	0.0160714	264	283	547
comp2275478_c0_seq7_m.79935	0.336235	0.331505	0.00899296	0.0314088	0.0346685	0.0155172	276	273	549
comp2278133_c0_seq3_m.87701	0.336259	0.334445	0.00888058	0.0311391	0.0344852	0.015625	274	275	549
comp2246119_c0_seq1_m.34306	0.360845	0.354386	0.00811637	0.0291297	0.032588	0.0164234	263	289	552
comp2259823_c0_seq1_m.51564	0.358976	0.355697	0.00822289	0.0294173	0.0327962	0.0163043	266	287	553
comp2270828_c0_seq11_m.69939	-0.356388	-0.364307	0.00940695	0.0306936	0.0356192	0.0157343	281	277	558
comp2277724_c0_seq10_m.86198	-0.361991	-0.360428	0.00918648	0.0301513	0.0351598	0.0159574	278	281	559
comp2274278_c0_seq6_m.77267	-0.363281	-0.363687	0.0105658	0.0315893	0.0388998	0.015411	289	271	560
comp2275508_c1_seq3_m.80009	-0.596964	-0.618945	0.0156493	0.0252716	0.0518719	0.0121457	321	242	563
comp2257070_c0_seq2_m.47512	-0.602038	-0.563983	0.0152486	0.0250009	0.0510206	0.0122951	318	245	563
comp2279297_c0_seq1_m.91091	0.260841	0.261345	0.00785293	0.0338092	0.0322685	0.0212418	258	305	563
comp2277475_c0_seq2_m.85365	-0.376607	-0.380974	0.00844596	0.0286814	0.0331605	0.0166667	271	293	564
comp2268417_c0_seq2_m.65592	-0.503342	-0.480549	0.0126604	0.0265705	0.0440219	0.0136719	306	259	565
gnl_Pdu_trscr_assembly_1_17807_m.62055	0.25987	0.259651	0.0077952	0.033719	0.0322685	0.0213115	259	306	565
comp2273900_c0_seq1_m.76336	0.252213	0.252656	0.00777802	0.0335385	0.0322685	0.0214521	257	308	565
comp2258349_c0_seq1_m.49321	-0.259567	-0.258319	0.00764751	0.0333581	0.0319096	0.0215947	255	310	565
comp2273595_c0_seq1_m.75667	-0.273123	-0.271567	0.00790385	0.0336288	0.032345	0.0213816	260	307	567
comp2262281_c0_seq3_m.55504	-0.609768	-0.568907	0.0160409	0.0251814	0.0525087	0.0121951	325	243	568
gnl_Pdu_trscr_assembly_1_2615_m.68529	0.266584	0.267704	0.0080945	0.0341955	0.032588	0.0211726	265	304	569
comp2264066_c0_seq3_m.58370	-0.394914	-0.401409	0.00974594	0.0290395	0.0367719	0.0164835	282	290	572
comp2276966_c0_seq13_m.83854	-0.275997	-0.275828	0.00836471	0.0343929	0.0330857	0.0211039	269	303	572
comp2277729_c0_seq10_m.86207	-0.563317	-0.530447	0.016938	0.0273957	0.0544471	0.0133588	331	253	584
comp2274819_c0_seq2_m.78403	0.308431	0.313158	0.0088013	0.0332679	0.0343025	0.0216667	273	311	584
gnl_Pdu_trscr_assembly_1_1986_m.5697	-0.319312	-0.323397	0.0102987	0.0344831	0.0381804	0.0210356	287	302	589
comp2253077_c0_seq1_m.42045	0.232336	0.232842	0.0092467	0.0359765	0.0352634	0.023511	279	315	594
comp2268441_c0_seq1_m.65632	0.605761	0.610764	0.0191604	0.0276664	0.0588952	0.0132075	346	250	596
comp2276743_c0_seq1_m.83169	0.28399	0.28123	0.00930127	0.0356006	0.0353448	0.0237342	280	318	598
comp2258014_c0_seq1_m.48797	-0.642776	-0.605063	0.0193734	0.0264803	0.0588952	0.0137255	345	260	605
comp2272124_c0_seq1_m.72532	-0.361826	-0.369645	0.0131837	0.0346635	0.0455437	0.0209003	308	300	608
comp2141229_c0_seq1_m.7283	-0.311776	-0.315238	0.0112301	0.0360667	0.0403641	0.0234375	296	314	610
comp2259221_c0_seq1_m.50687	0.368425	0.375544	0.0136428	0.0345733	0.0466751	0.0209677	311	301	612
comp2254206_c0_seq1_m.43646	0.321643	0.322356	0.0110484	0.0354126	0.0401017	0.0238095	293	319	612
comp2272842_c0_seq2_m.74081	-0.48532	-0.512114	0.0189344	0.0316795	0.0585644	0.0153584	344	270	614
comp1769718_c0_seq1_m.2239	0.322226	0.317064	0.0119686	0.0362472	0.04189	0.0232919	304	312	616
comp2274517_c0_seq1_m.77807	0.261492	0.259201	0.00995878	0.0379041	0.0372681	0.0272727	285	332	617
comp2273193_c0_seq1_m.74830	-0.515612	-0.532961	0.0160791	0.0287716	0.0525087	0.0166052	326	292	618
comp2259349_c0_seq2_m.50877	-0.423382	-0.429074	0.016043	0.0326974	0.0525087	0.0167224	324	294	618
comp2278238_c0_seq6_m.88188	0.3067	0.30204	0.01141	0.0370921	0.0405507	0.0246154	300	323	623
comp2259918_c0_seq1_m.51762	0.257641	0.259171	0.0107019	0.0393487	0.0392227	0.0281899	290	334	624
comp2272433_c0_seq1_m.73197	0.286072	0.283037	0.011305	0.03836	0.0403641	0.027027	298	329	627
comp2272807_c0_seq4_m.74003	-0.271154	-0.270795	0.0111188	0.0391711	0.040103	0.0282738	295	335	630
comp2262927_c0_seq2_m.56544	0.294334	0.290588	0.0117934	0.0382697	0.0415503	0.0271084	302	330	632
comp2257601_c0_seq2_m.48241	-0.22421	-0.224596	0.0110807	0.0396231	0.0401017	0.0295858	294	338	632
comp2250982_c0_seq1_m.39507	0.216231	0.215733	0.0112862	0.0387979	0.0403641	0.0284431	297	337	634
comp2265049_c0_seq3_m.59764	0.461178	0.439623	0.0184373	0.0321353	0.057868	0.0168919	339	297	636
comp2274806_c0_seq1_m.78376	-0.567742	-0.528201	0.0205019	0.029688	0.0610685	0.016129	357	284	641
comp2272371_c0_seq1_m.73054	-0.267048	-0.270171	0.0114335	0.0398102	0.0405507	0.0309735	299	342	641
comp2272876_c0_seq2_m.74167	0.335786	0.342996	0.0138871	0.0377265	0.0472074	0.0273556	313	333	646
comp2143334_c0_seq2_m.7649	0.289406	0.284477	0.0129649	0.0404342	0.0449338	0.0307018	307	339	646
comp2273204_c0_seq26_m.74869	-0.340773	-0.339311	0.0148997	0.0379944	0.0501685	0.0271903	316	331	647
comp2268874_c0_seq62_m.66354	-0.228727	-0.229953	0.0118365	0.0417143	0.0415643	0.031339	303	347	650
comp2253217_c0_seq2_m.42336	-0.224584	-0.225702	0.011784	0.0414436	0.0415503	0.0316092	301	350	651
comp2278306_c0_seq2_m.88465	-0.208173	-0.207629	0.0132852	0.0423647	0.0457459	0.0309859	309	343	652
comp2277388_c0_seq8_m.85093	-0.48941	-0.513666	0.0202299	0.0320451	0.0604623	0.0169492	356	298	654
comp2258349_c0_seq1_m.49322	-0.367569	-0.378293	0.0165179	0.037547	0.0534195	0.0259146	329	326	655
comp2278378_c0_seq4_m.88778	-0.50168	-0.467551	0.0219169	0.0326071	0.0644187	0.0167785	362	295	657
comp2277501_c0_seq23_m.85461	-0.269927	-0.266117	0.0122456	0.0411664	0.0427189	0.0317919	305	352	657
comp2244968_c0_seq1_m.33120	0.521583	0.507645	0.0229516	0.0324201	0.0665408	0.016835	367	296	663
comp2228369_c0_seq1_m.21627	-0.289361	-0.290015	0.0138047	0.0412566	0.0470775	0.0317003	312	351	663
comp2273519_c1_seq9_m.75533	0.380986	0.373664	0.0176774	0.0373665	0.0559784	0.0260736	336	328	664
comp2258554_c1_seq2_m.49570	-0.535133	-0.522053	0.022885	0.0318665	0.0665292	0.0170068	366	299	665
comp2279748_c0_seq1_m.91174	0.304495	0.304482	0.0158554	0.0422744	0.0523916	0.0310734	322	344	666
comp2274106_c1_seq2_m.76871	-0.479763	-0.452603	0.0212868	0.0334483	0.0629145	0.0215232	360	309	669
comp2271350_c0_seq18_m.70897	0.431774	0.451084	0.0193304	0.0351419	0.0588952	0.0240385	347	322	669
comp2237757_c0_seq1_m.27251	0.23082	0.230936	0.0150523	0.0473083	0.0505225	0.0459459	317	362	679
comp2267341_c0_seq1_m.63653	0.324322	0.33375	0.0170572	0.0416241	0.0546203	0.0314286	332	348	680
comp2276498_c0_seq1_m.82544	-0.326609	-0.32064	0.0172643	0.0415338	0.0549976	0.0315186	334	349	683
comp2275625_c0_seq11_m.80264	-0.461616	-0.489228	0.0232156	0.0358863	0.0671234	0.0235849	368	316	684
comp2266680_c0_seq1_m.62479	-0.241027	-0.243405	0.0143697	0.0458008	0.0486921	0.0469613	314	370	684
comp2270576_c0_seq1_m.69463	0.421973	0.408164	0.0215017	0.0374568	0.0633735	0.0259939	361	327	688
comp2271755_c0_seq2_m.71808	0.297077	0.299315	0.0168138	0.0437058	0.0542119	0.0420168	330	359	689
gnl_Pdu_trscr_assembly_1_19681_m.92605	0.357757	0.347269	0.0191183	0.040344	0.0588952	0.0307918	350	340	690
comp2269158_c0_seq1_m.66914	0.345023	0.353373	0.0181919	0.0407115	0.0572667	0.0319767	338	354	692
comp2257633_c0_seq1_m.48279	-0.237129	-0.239688	0.0155062	0.0479774	0.0515581	0.0512129	320	373	693
comp2273249_c0_seq4_m.74967	-0.365073	-0.378853	0.0198748	0.0402538	0.0595683	0.0308824	355	341	696
comp2268937_c0_seq1_m.66472	0.304743	0.308763	0.018777	0.04425	0.0584174	0.0416667	341	356	697
comp2259363_c0_seq16_m.50888	0.270522	0.271971	0.0163144	0.045891	0.052939	0.046832	328	369	697
comp1194322_c0_seq2_m.793	0.231054	0.228742	0.0160882	0.0493553	0.0525087	0.0533333	323	374	697
comp2274295_c0_seq2_m.77311	-0.498185	-0.461586	0.0269764	0.036157	0.0745531	0.0233645	385	313	698
comp2276577_c0_seq8_m.92288	0.275031	0.269974	0.0170945	0.0464624	0.0546203	0.0463215	333	365	698
comp2268340_c1_seq1_m.65478	0.283467	0.277867	0.0189182	0.047218	0.0585644	0.0460705	343	363	706
comp2241992_c0_seq1_m.30524	0.316592	0.314803	0.0198402	0.0439756	0.0595683	0.0417827	352	357	709
comp2287273_c0_seq1_contamination_m.91384	0.305259	0.311837	0.0192319	0.0450357	0.0588952	0.0443213	349	361	710
comp2278012_c0_seq11_m.87235	-0.548717	-0.501876	0.0290819	0.0352321	0.0791771	0.0239617	391	321	712
comp2280536_c0_seq1_m.91231	0.294358	0.294425	0.0193253	0.0467481	0.0588952	0.0461957	348	364	712
comp2277230_c0_seq15_m.84634	-0.272327	-0.27634	0.0185211	0.0483383	0.05796	0.0510753	340	372	712
comp2262197_c0_seq1_m.55346	0.433871	0.409379	0.0254305	0.0390808	0.0713933	0.0283582	379	336	715
comp2276634_c1_seq3_m.82935	0.382006	0.372519	0.023737	0.0418045	0.0681874	0.03125	373	346	719
comp2269201_c0_seq1_m.67004	-0.563158	-0.611753	0.0312313	0.0356908	0.0819041	0.0236593	405	317	722
comp2269374_c0_seq3_m.67298	-0.211447	-0.210411	0.0177803	0.0521767	0.0561371	0.0620155	337	385	722
comp2233777_c0_seq1_m.24586	-0.216855	-0.21672	0.0174955	0.0518167	0.0555676	0.0625	335	388	723
comp2274137_c1_seq25_m.76929	0.397104	0.417336	0.0242341	0.0410761	0.0687295	0.0318841	375	353	728
comp2277337_c0_seq4_m.84929	0.190248	0.190416	0.0194526	0.0516288	0.0589675	0.0600522	351	379	730
comp2269987_c0_seq2_m.68354	0.203408	0.20312	0.0187753	0.0535714	0.0584174	0.0639386	342	390	732
comp2248254_c1_seq2_m.36433	0.553795	0.509065	0.0327482	0.0369145	0.0849855	0.0246914	409	324	733
comp2261047_c0_seq1_m.53653	-0.335063	-0.323994	0.0238986	0.0461767	0.0681874	0.0465753	370	367	737
comp2247176_c0_seq3_m.35337	-0.201082	-0.200781	0.0198012	0.0547932	0.0595683	0.0656566	353	393	746
comp2275974_c0_seq18_m.81146	-0.596322	-0.530872	0.0352977	0.0366316	0.0889971	0.0247678	422	325	747
comp2266755_c0_seq1_m.62616	0.657239	0.585204	0.0369267	0.0353224	0.0911602	0.0238854	430	320	750
comp2250533_c0_seq1_m.39039	-0.240008	-0.243115	0.0208818	0.0544981	0.0618892	0.0658228	359	394	753
comp2269029_c1_seq11_m.66661	-0.177959	-0.178084	0.0227864	0.0530263	0.0664625	0.0642674	364	392	756
comp2256252_c0_seq1_m.46348	-0.458565	-0.426281	0.0329893	0.0420968	0.0853166	0.0311615	412	345	757
comp2268798_c0_seq2_m.66233	0.466368	0.483708	0.0312529	0.0406212	0.0819041	0.03207	404	355	759
comp2263771_c0_seq2_m.57851	0.21133	0.210071	0.0198462	0.0556288	0.0595683	0.0728643	354	407	761
comp2277374_c0_seq2_m.85051	0.37674	0.35892	0.0295599	0.0462669	0.0799043	0.0464481	396	366	762
comp2278238_c1_seq2_m.88191	0.198028	0.199036	0.0205475	0.0561814	0.0610685	0.0723192	358	404	762
comp2278194_c0_seq1_m.87981	-0.291273	-0.291399	0.0245972	0.051907	0.0694203	0.0623377	377	387	764
comp2251346_c0_seq1_m.39994	-0.267832	-0.272328	0.023904	0.0542303	0.0681874	0.0661578	369	396	765
comp2275698_c0_seq5_m.80432	-0.31485	-0.311101	0.0266713	0.0507989	0.0740946	0.060686	383	383	766
comp2270905_c1_seq5_m.70069	-0.242941	-0.240313	0.0227996	0.0568506	0.0664625	0.0717822	365	401	766
comp2266714_c1_seq1_m.62532	0.290431	0.284036	0.0265104	0.0537509	0.0738404	0.0637755	382	389	771
comp2272293_c0_seq1_m.72898	0.201351	0.201874	0.0223772	0.0601034	0.0655906	0.0746988	363	408	771
comp2272583_c0_seq2_m.73488	-0.173263	-0.173171	0.0249085	0.0543205	0.0701128	0.0659898	378	395	773
comp2278605_c1_seq8_m.90480	-0.430344	-0.406855	0.0340418	0.0438853	0.0868595	0.0418994	417	358	775
comp2267483_c0_seq3_m.63903	-0.298528	-0.307723	0.026829	0.0531165	0.0743386	0.0641026	384	391	775
tuba_m.92505	0.462281	0.430659	0.0359291	0.0433261	0.0903749	0.0421348	423	360	783
comp2275406_c1_seq7_m.79751	0.231979	0.232232	0.0236522	0.0597274	0.0681874	0.0752427	372	411	783
comp2270372_c0_seq1_m.69078	0.234717	0.238564	0.0242117	0.0599229	0.0687295	0.0750605	374	410	784
comp2270458_c0_seq1_m.69251	-0.269775	-0.276564	0.0270836	0.0571147	0.0746554	0.0716049	386	400	786
comp2273667_c0_seq6_m.75821	0.204434	0.203212	0.0238739	0.0627049	0.0681874	0.0772834	371	421	792
comp2277163_c0_seq1_m.84431	-0.212895	-0.214104	0.0242879	0.0629746	0.0687295	0.0771028	376	419	795
comp2269773_c0_seq6_m.68002	0.16355	0.163614	0.0298139	0.0563788	0.0799043	0.0721393	395	403	798
comp2269814_c0_seq1_m.68069	0.224736	0.221739	0.0258215	0.0636269	0.0723003	0.0769231	380	418	798
comp2276805_c0_seq8_m.83380	-0.199678	-0.198506	0.0262696	0.0664511	0.0733617	0.0772727	381	420	801
comp2277388_c0_seq8_m.85092	-0.366983	-0.380885	0.0350671	0.0510648	0.0886255	0.0603675	421	381	802
comp2280482_c0_seq1_m.91228	-0.294017	-0.298027	0.0297353	0.0560912	0.0799043	0.0725	397	405	802
gnl_Pdu_trscr_assembly_1_20144_m.60515	0.349196	0.332207	0.0341621	0.0520865	0.086958	0.0621762	418	386	804
gnl_Pdu_trscr_assembly_1_1644_m.62862	-0.226925	-0.22699	0.0286424	0.0663609	0.0783432	0.0774487	389	422	811
comp2271753_c0_seq2_m.71801	-0.219572	-0.216193	0.0273782	0.0661852	0.0752723	0.0776256	387	424	811
comp2276166_c0_seq8_m.81705	0.400744	0.386879	0.0382912	0.0499286	0.0927045	0.0583554	440	377	817
comp2277816_c0_seq2_m.86536	-0.252903	-0.254595	0.0304184	0.0640855	0.0805105	0.0765661	402	416	818
comp2266675_c0_seq1_m.62468	0.461362	0.463624	0.0407624	0.0460865	0.096075	0.0467033	453	368	821
comp2252790_c0_seq1_m.41691	0.43253	0.418767	0.0409894	0.0484286	0.096075	0.0509383	452	371	823
comp2269848_c0_seq4_m.68115	-0.337034	-0.322439	0.036581	0.055078	0.0911525	0.0680101	426	397	823
comp2276160_c0_seq4_m.81678	-0.287824	-0.295452	0.0330453	0.0600132	0.0853166	0.0748792	414	409	823
comp2265462_c0_seq5_m.60462	-0.239102	-0.241456	0.0301763	0.0660066	0.08046	0.0778032	400	426	826
comp2277413_c0_seq4_m.85165	-0.265678	-0.263297	0.0290961	0.0604746	0.0791771	0.0793269	390	440	830
comp2270385_c0_seq11_m.69105	0.29743	0.287065	0.0344022	0.0595395	0.0873603	0.0754258	419	412	831
comp2107035_c0_seq2_m.6021	-0.204138	-0.205581	0.0279019	0.068719	0.0765144	0.0853933	388	444	832
comp2265494_c0_seq1_m.60519	0.424704	0.405976	0.0419756	0.0500188	0.0975154	0.0582011	457	376	833
comp2250550_c1_seq1_m.39064	-0.38375	-0.388669	0.0407109	0.0526278	0.096075	0.0618557	451	384	835
comp2245511_c0_seq1_m.33658	-0.335026	-0.344381	0.0367768	0.055719	0.0911602	0.0726817	429	406	835
comp2276668_c0_seq1_m.83017	-0.325613	-0.335425	0.0380538	0.0575789	0.0925346	0.0712531	438	398	836
comp2234079_c0_seq2_m.24745	0.276708	0.272289	0.0331965	0.0622321	0.0853166	0.0776471	411	425	836
comp2273845_c0_seq2_m.76206	0.26683	0.273695	0.0304078	0.0614032	0.0805105	0.0785714	401	435	836
comp2261058_c0_seq1_m.53667	0.225867	0.227105	0.0302481	0.0685414	0.08046	0.0855856	399	445	844
comp2237053_c0_seq1_m.26700	0.285048	0.277016	0.0367581	0.0639953	0.0911602	0.0767442	428	417	845
comp2261980_c0_seq3_m.55041	-0.190441	-0.188842	0.0297574	0.0727754	0.0799043	0.0919037	394	452	846
comp2254566_c0_seq1_m.44122	-0.191273	-0.192323	0.0297073	0.0726852	0.0799043	0.0921053	393	453	846
comp2251866_c0_seq1_m.40557	-0.189561	-0.189501	0.029682	0.0725949	0.0799043	0.0923077	392	454	846
comp2268942_c0_seq5_m.66483	-0.316734	-0.304502	0.037239	0.058515	0.0913789	0.0757946	433	414	847
comp2142866_c0_seq1_m.7576	0.341856	0.327651	0.0408581	0.0572049	0.096075	0.0714286	450	399	849
comp2247229_c0_seq1_m.35389	0.227135	0.22823	0.0308089	0.0693017	0.0813417	0.0874439	403	448	851
comp2212572_c0_seq1_m.15390	0.203096	0.202956	0.0299312	0.0720301	0.080017	0.092511	398	455	853
comp2280694_c0_seq1_m.91236	0.467648	0.462139	0.0466948	0.049062	0.103723	0.0534759	479	375	854
comp2267691_c0_seq1_m.64257	-0.246147	-0.252123	0.0331655	0.0676805	0.0853166	0.0812641	413	441	854
comp1194290_c0_seq1_m.781	0.223112	0.22566	0.0318315	0.0711927	0.0832156	0.0911111	407	450	857
comp2263928_c0_seq2_m.58107	0.327162	0.336845	0.0390026	0.0584248	0.0934506	0.0759804	444	415	859
comp2275457_c1_seq8_m.79890	0.272481	0.26644	0.0363756	0.0654539	0.0911525	0.078341	427	432	859
comp2273645_c0_seq11_m.75781	0.276422	0.286289	0.0374447	0.0657237	0.0913789	0.0779817	434	428	862
comp2277505_c0_seq1_m.85479	0.202234	0.204202	0.0312121	0.0737932	0.0819041	0.0952381	406	459	865
comp2138816_c0_seq1_m.6842	-0.454096	-0.48567	0.0483943	0.0508891	0.105515	0.0605263	487	382	869
comp2278454_c0_seq1_m.89160	-0.301939	-0.289765	0.0374121	0.0614934	0.0913789	0.0783848	436	433	869
comp2256558_c1_seq1_m.46706	-0.306424	-0.315467	0.0390841	0.0619464	0.0934506	0.0780142	443	429	872
comp2276151_c0_seq3_m.81648	0.201877	0.200468	0.0319614	0.0750056	0.0833504	0.0991379	408	464	872
comp2272691_c0_seq4_m.73750	-0.47861	-0.429842	0.0520828	0.051344	0.111726	0.0602094	496	380	876
comp2347711_c0_seq1_contamination_m.91628	-0.287055	-0.298456	0.0396431	0.0655442	0.0943629	0.0781609	447	430	877
comp2275191_c1_seq2_m.79282	0.270389	0.261451	0.0380923	0.0675902	0.0925346	0.081448	437	442	879
comp2139380_c0_seq1_m.6935	0.345778	0.328559	0.0438502	0.0592444	0.0996937	0.0756098	467	413	880
comp1201878_c0_seq1_m.1138	-0.214895	-0.212441	0.0335561	0.0748299	0.0860329	0.0993521	415	465	880
comp2263950_c0_seq2_m.58147	0.310989	0.302479	0.0389167	0.060938	0.0934506	0.0787589	445	437	882
comp2236614_c0_seq1_m.26450	-0.536466	-0.471926	0.0566203	0.0498383	0.118357	0.0585106	508	378	886
comp2277951_c0_seq2_m.87004	-0.242678	-0.235764	0.037222	0.0728656	0.0913789	0.0917031	435	451	886
comp2277312_c0_seq10_m.84862	0.257572	0.251867	0.038438	0.070375	0.0927393	0.0890869	441	449	890
comp2269593_c0_seq3_m.67692	0.188705	0.186549	0.0365629	0.0814427	0.0911525	0.105155	425	466	891
comp2262638_c0_seq1_m.56073	-0.190498	-0.192259	0.0347095	0.0787491	0.0879309	0.105932	420	472	892
comp2261373_c0_seq1_m.54127	-0.191148	-0.191062	0.0326803	0.0769934	0.0849855	0.107296	410	487	897
comp2265997_c0_seq1_m.61310	0.165625	0.165574	0.0364223	0.0784633	0.0911525	0.106157	424	474	898
gnl_Pdu_trscr_assembly_1_1213_m.70099	-0.174517	-0.175442	0.0338091	0.0774577	0.0864734	0.106838	416	482	898
comp2273772_c0_seq2_m.76039	0.194657	0.195428	0.0369227	0.0809643	0.0911602	0.10559	431	469	900
comp2239935_c0_seq1_m.28757	-0.257969	-0.253179	0.0398144	0.0717425	0.0945593	0.0929204	448	457	905
comp1194294_c0_seq1_m.785	0.281957	0.287391	0.0426729	0.0693919	0.0987043	0.0872483	460	447	907
comp2276202_c0_seq3_m.81780	0.316686	0.306001	0.0462405	0.0652782	0.102929	0.0785219	478	434	912
comp2259377_c0_seq1_m.50914	-0.20768	-0.207692	0.0374312	0.0795038	0.0913789	0.107368	432	488	920
comp2270432_c0_seq1_m.69185	-0.213826	-0.215974	0.0392656	0.0803252	0.0936739	0.10625	446	475	921
comp2271594_c0_seq8_m.71451	-0.357786	-0.38272	0.050027	0.0618562	0.108409	0.0781991	491	431	922
comp2253875_c0_seq1_m.43271	0.273107	0.272076	0.0435981	0.0718327	0.0995459	0.0927152	466	456	922
comp2275853_c0_seq1_m.80817	0.276733	0.267652	0.0445093	0.0716523	0.100568	0.0931264	470	458	928
comp2265029_c1_seq4_m.59734	0.223397	0.228277	0.0415622	0.0804154	0.0970161	0.106029	456	473	929
comp2245687_c1_seq1_m.33822	0.485968	0.435205	0.0642499	0.0565573	0.129473	0.0719603	528	402	930
comp2140166_c0_seq1_m.7086	0.268521	0.261125	0.0443662	0.0732472	0.100568	0.0958606	469	462	931
comp2253656_c0_seq2_m.42945	-0.21988	-0.223021	0.0400006	0.0796842	0.0947898	0.106918	449	483	932
comp2262887_c0_seq1_m.56477	0.184562	0.18299	0.0383364	0.0841664	0.0927045	0.10998	439	493	932
comp2265923_c0_seq1_m.61202	-0.31955	-0.301773	0.0496529	0.0675	0.107818	0.0816327	490	443	933
comp2273141_c0_seq2_m.74737	-0.234758	-0.227912	0.0431771	0.079016	0.099091	0.105708	463	470	933
comp2271381_c1_seq12_m.70942	-0.183132	-0.183846	0.0387189	0.085094	0.0932057	0.111111	442	495	937
comp1953876_c0_seq1_m.3493	0.396063	0.410495	0.058975	0.0626147	0.121372	0.0774648	517	423	940
comp2273929_c1_seq1_m.76435	0.23128	0.228181	0.0430022	0.0797744	0.0990353	0.106695	461	480	941
comp2275266_c0_seq21_m.79421	-0.20204	-0.205784	0.0409944	0.0847321	0.096075	0.109312	454	490	944
comp2249005_c0_seq2_m.37257	0.226071	0.23074	0.0434751	0.0819098	0.0994786	0.106776	465	481	946
comp2268903_c0_seq4_m.66397	-0.207476	-0.21148	0.0419141	0.0845367	0.0975154	0.109533	458	491	949
comp2271124_c0_seq1_m.70454	0.209846	0.205481	0.042324	0.0844464	0.0981106	0.109756	459	492	951
comp2267968_c0_seq2_m.64758	-0.291314	-0.291627	0.0507315	0.0736053	0.109489	0.0954447	493	460	953
comp2187328_c0_seq1_m.10936	-0.284284	-0.289666	0.050428	0.0750959	0.109056	0.0989247	492	463	955
comp2270996_c0_seq5_m.70236	0.415424	0.378946	0.0592276	0.0606551	0.121657	0.0789474	518	438	956
comp2271675_c0_seq2_m.71655	0.405315	0.38547	0.0634465	0.0644492	0.128585	0.0787037	525	436	961
comp2278480_c1_seq1_m.89333	-0.304736	-0.290227	0.0542252	0.0733374	0.115161	0.0956522	501	461	962
comp2260997_c1_seq7_m.53574	0.187751	0.188779	0.0415783	0.0887547	0.0970161	0.118343	455	510	965
comp2273028_c0_seq3_m.74502	-0.35384	-0.349845	0.0616931	0.069907	0.125884	0.0870536	521	446	967
comp2279340_c0_seq1_m.91103	-0.186276	-0.186309	0.0429238	0.0909145	0.0990353	0.117417	462	505	967
comp2277947_c0_seq1_m.86990	0.165014	0.165952	0.0432126	0.0918083	0.099091	0.118677	464	512	976
comp2278308_c1_seq12_m.88483	-0.179445	-0.177333	0.0438438	0.0927321	0.0996937	0.120388	468	516	984
comp2275295_c1_seq2_m.79482	0.543095	0.467452	0.0791665	0.0605648	0.151498	0.0791367	556	439	995
comp2242407_c0_seq1_m.30845	-0.581396	-0.554103	0.0875263	0.0620367	0.163669	0.0778302	569	427	996

## Sheet: PM_NM_Female vs M_NM_Female
	limma.logFC	rots.logFC	limma.pvalue	rots.pvalue	limma.adj.pvalue	rots.adj.pvalue	limma.rank	rots.rank	rank.sum
comp2242933_c0_seq1_m.31351	1.71377	1.7154	3.62e-07	9.02256e-05	0.000358279	0	1	1	2
gene17_m.92593	1.41501	1.41873	6.73e-07	0.000180451	0.000358279	0	2	2	4
comp2272698_c0_seq4_m.73763	0.850359	0.850718	1.18e-06	0.000451128	0.0004196	0	3	3	6
comp2262137_c0_seq4_m.55246	-1.16506	-1.16919	2.49e-06	0.000270677	0.000661052	0	4	4	8
comp2234282_c0_seq1_m.24908	0.652552	0.653067	7.62e-06	0.00108271	0.00162102	0	5	5	10
comp2272319_c0_seq24_m.72950	1.44637	1.46128	1.18e-05	0.000360902	0.00209948	0	6	6	12
comp2263011_c0_seq1_m.56689	0.577782	0.577495	1.49e-05	0.00198496	0.00226194	0	7	7	14
comp2266280_c0_seq1_m.61789	0.795485	0.798441	2.06e-05	0.000992481	0.00243671	0	8	8	16
comp2267341_c0_seq1_m.63653	0.728343	0.728556	2.05e-05	0.00117293	0.00243671	0	9	9	18
comp2270279_c0_seq7_m.68904	0.581614	0.581673	2.42e-05	0.00279699	0.00257779	0	10	10	20
comp2208474_c0_seq1_m.14351	1.05083	1.04213	3.69e-05	0.000721805	0.00263784	0	11	11	22
comp2266512_c0_seq8_m.62145	0.52394	0.524082	3.5e-05	0.00406015	0.00263784	0	12	12	24
comp2273926_c0_seq5_m.76421	-1.30658	-1.31835	4.21e-05	0.000541353	0.00263784	0	13	13	26
comp2274819_c0_seq2_m.78403	0.661175	0.662506	3.35e-05	0.00234586	0.00263784	0	14	14	28
comp2276750_c0_seq1_m.83194	0.495726	0.495846	4.03e-05	0.00496241	0.00263784	0	15	15	30
comp2278587_c0_seq14_m.90327	-0.633551	-0.63455	3.74e-05	0.00270677	0.00263784	0	16	16	32
gnl_Pdu_trscr_assembly_1_91632_m.21453	0.654077	0.653015	2.76e-05	0.00207519	0.00263784	0	17	17	34
comp2266841_c0_seq1_m.62766	-0.452285	-0.452436	4.65e-05	0.00514286	0.00274843	0	18	18	36
comp2261395_c0_seq1_m.54150	-0.62211	-0.622342	6.11e-05	0.00360902	0.00277961	0	19	19	38
comp2262137_c0_seq3_m.92268	-1.14216	-1.13615	5.67e-05	0.000631579	0.00277961	0	20	20	40
comp2265897_c0_seq5_m.61166	0.447088	0.447287	5.61e-05	0.00613252	0.00277961	0	21	21	42
comp2271994_c0_seq2_m.72269	-0.934073	-0.926088	6.1e-05	0.000902256	0.00277961	0	22	22	44
comp2273141_c0_seq2_m.74737	-0.59281	-0.590828	6.27e-05	0.00396992	0.00277961	0	23	23	46
gnl_Pdu_trscr_assembly_1_998_m.15062	0.579557	0.577462	6.01e-05	0.00415038	0.00277961	0	24	24	48
comp2257487_c0_seq1_m.48064	0.460896	0.46094	6.53e-05	0.00667387	0.00278032	0	25	25	50
comp2275110_c1_seq5_m.79090	0.835709	0.836243	8.21e-05	0.00162406	0.00306671	0	26	26	52
comp2275241_c0_seq5_m.79383	-0.42121	-0.421001	8.36e-05	0.00775376	0.00306671	0	27	27	54
comp2275905_c0_seq4_m.80965	0.858294	0.863908	7.94e-05	0.00144361	0.00306671	0	28	28	56
comp2277933_c1_seq7_m.86947	-0.698646	-0.700603	8.19e-05	0.00288722	0.00306671	0	29	29	58
comp2251806_c0_seq1_m.40480	0.542739	0.543963	0.000100712	0.00550376	0.00345668	0	30	30	60
comp2268115_c0_seq2_m.65034	0.620099	0.622501	9.76e-05	0.00433083	0.00345668	0	31	31	62
comp2189372_c0_seq1_m.11219	0.446609	0.445712	0.000108454	0.00784398	0.00349681	0	32	32	64
comp2267571_c0_seq4_m.64058	0.521914	0.523217	0.000106941	0.00631297	0.00349681	0	33	33	66
comp2258554_c0_seq1_m.49568	-0.466381	-0.466722	0.00013773	0.00793421	0.00429767	0	34	34	68
comp2276768_c0_seq2_m.83249	0.718196	0.724699	0.000141371	0.00333835	0.00429767	0	35	35	70
comp1965369_c0_seq1_contamination_m.3664	0.660181	0.66013	0.000150836	0.0042406	0.00445803	0	36	36	72
gnl_Pdu_trscr_assembly_1_7327_m.81715	0.529415	0.529324	0.000155812	0.00712218	0.00448064	0	37	37	74
comp2277416_c0_seq3_m.85174	-0.660025	-0.659754	0.000168106	0.00442105	0.00470697	0	38	38	76
comp2245014_c0_seq2_m.33157	0.856234	0.851641	0.000188007	0.00225564	0.00510173	0	39	39	78
comp2260058_c0_seq1_m.51934	0.701355	0.705242	0.000201073	0.0038797	0.00510173	0	40	40	80
comp2263291_c0_seq2_m.57114	0.755052	0.75861	0.000201384	0.0035188	0.00510173	0	41	41	82
comp2276523_c0_seq2_m.82609	0.402089	0.40291	0.000199477	0.0109088	0.00510173	0	42	42	84
comp2267209_c0_seq1_m.63399	-0.563536	-0.561897	0.000224461	0.00685432	0.00519188	0	43	43	86
comp2269060_c0_seq1_m.66718	-0.45959	-0.457851	0.000210259	0.00901692	0.00519188	0	44	44	88
comp2269906_c0_seq2_m.68214	0.617089	0.612228	0.000223225	0.00523308	0.00519188	0	45	45	90
comp2277501_c0_seq23_m.85461	-0.445132	-0.446225	0.000217206	0.009375	0.00519188	0	46	46	92
comp2277933_c1_seq7_m.86946	-1.03407	-1.02073	0.000239269	0.00135338	0.00541664	0	47	47	94
comp2276871_c0_seq8_m.83582	0.503238	0.506629	0.000269998	0.00829511	0.00598496	0	48	48	96
comp1838578_c0_seq1_m.2293	0.814456	0.822956	0.000284939	0.00315789	0.00599172	0	49	49	98
comp1945561_c0_seq2_m.3380	-0.611292	-0.606118	0.000293554	0.00595207	0.00599172	0	50	50	100
comp2268892_c0_seq1_m.66381	-0.462646	-0.462167	0.000298902	0.00955545	0.00599172	0	51	51	102
comp2269171_c0_seq3_m.66933	0.449986	0.44775	0.000304091	0.0100968	0.00599172	0	52	52	104
comp2276277_c0_seq18_m.81972	0.476536	0.478925	0.000296937	0.00919455	0.00599172	0	53	53	106
comp2279213_c0_seq1_m.91075	0.496268	0.493517	0.000299497	0.00874624	0.00599172	0	54	54	108
comp2252186_c0_seq3_m.40915	0.947929	0.951559	0.000321319	0.00216541	0.00621607	0	55	55	110
comp1197507_c0_seq1_m.1032	0.6423	0.640775	0.000336932	0.00559398	0.00638346	0	56	56	112
comp2203251_c0_seq1_m.13504	-0.401184	-0.401644	0.000341971	0.0130742	0.00638346	0	57	57	114
comp2266171_c0_seq1_m.61557	0.527502	0.531058	0.000348277	0.00820489	0.00638908	0	58	58	116
comp2249227_c0_seq1_m.37479	0.375209	0.376157	0.00035736	0.0140667	0.0064446	0	59	59	118
comp2254470_c0_seq1_m.44006	-0.36692	-0.366154	0.000378659	0.0150536	0.00663479	0	60	60	120
comp2276389_c1_seq15_m.82250	0.420974	0.419964	0.000380378	0.0123524	0.00663479	0	61	61	122
comp2277947_c0_seq1_m.86990	0.577955	0.576647	0.000403745	0.00748308	0.0068294	0	62	62	124
comp2278405_c0_seq22_m.88893	-0.965743	-0.959837	0.000404372	0.00252632	0.0068294	0	63	63	126
comp2257395_c0_seq4_m.47951	-1.69625	-1.73408	0.000410921	0.00081203	0.00683157	0	64	64	128
comp2223962_c0_seq7_m.19686	0.550191	0.548215	0.000419445	0.00802444	0.00686599	0	65	65	130
comp2236614_c0_seq1_m.26450	-1.04601	-1.03147	0.000428079	0.00189474	0.00686709	0	66	66	132
comp2265885_c0_seq3_m.61143	-0.575179	-0.57823	0.00043242	0.00766353	0.00686709	0	67	67	134
comp2244968_c0_seq1_m.33120	0.63147	0.639779	0.000539928	0.00721241	0.00721589	0	68	68	136
comp2247988_c0_seq1_m.36173	-0.530901	-0.533112	0.000508108	0.00892669	0.00721589	0	69	69	138
comp2253856_c0_seq1_m.43254	0.538581	0.538411	0.00046721	0.00838534	0.00721589	0	70	70	140
comp2261623_c0_seq1_m.54431	-0.701771	-0.697252	0.000545804	0.00532331	0.00721589	0	71	71	142
comp2263921_c0_seq2_m.58101	-0.745208	-0.735964	0.000481122	0.00478195	0.00721589	0	72	72	144
comp2263928_c0_seq2_m.58107	0.679211	0.686879	0.000526991	0.00577444	0.00721589	0	73	73	146
comp2265589_c0_seq2_m.60673	0.475034	0.473239	0.000507371	0.0108186	0.00721589	0	74	74	148
comp2265656_c0_seq3_m.60780	-1.24814	-1.27816	0.000517407	0.00126316	0.00721589	0	75	75	150
comp2268340_c1_seq1_m.65478	-0.322821	-0.322845	0.000505918	0.0181175	0.00721589	0	76	76	152
comp2269321_c1_seq1_m.67212	0.48172	0.478687	0.00054933	0.0107284	0.00721589	0	77	77	154
comp2271350_c0_seq18_m.70897	0.815957	0.827581	0.000489766	0.00369925	0.00721589	0	78	78	156
comp2273599_c0_seq7_m.75677	-0.709532	-0.719444	0.000498739	0.00505263	0.00721589	0	79	79	158
comp2274295_c0_seq2_m.77311	-1.1859	-1.18707	0.000515027	0.00153383	0.00721589	0	80	80	160
gnl_Pdu_trscr_assembly_1_2615_m.68529	0.368508	0.369538	0.000542725	0.0160404	0.00721589	0	81	81	162
comp2204754_c0_seq1_m.13720	-0.46917	-0.471879	0.000572386	0.01136	0.00742706	0	82	82	164
comp2260394_c0_seq1_m.52394	0.445853	0.442751	0.00061605	0.0128036	0.00758805	0	83	83	166
comp2278010_c1_seq9_m.87231	0.342673	0.341616	0.000620451	0.0182077	0.00758805	0	84	84	168
comp2278306_c0_seq2_m.88465	-0.395964	-0.397425	0.000614409	0.0152312	0.00758805	0	85	85	170
gnl_Pdu_trscr_assembly_1_14069_m.67140	0.456745	0.454242	0.00061359	0.012172	0.00758805	0	86	86	172
gnl_Pdu_trscr_assembly_1_16296_m.13041	0.363528	0.362037	0.000600545	0.0165818	0.00758805	0	87	87	174
comp2261399_c0_seq2_m.54155	-1.08676	-1.1175	0.000672534	0.00243609	0.00813155	0	88	88	176
comp1910314_c0_seq1_m.2848	0.526053	0.521448	0.000680436	0.00946523	0.00813465	0	89	89	178
comp2254456_c0_seq2_m.43993	-0.482504	-0.481569	0.00072428	0.0115404	0.00819823	0	90	90	180
comp2261362_c0_seq2_m.54116	-0.456499	-0.454644	0.000718395	0.0127133	0.00819823	0	91	91	182
comp2265077_c0_seq1_m.59810	0.344293	0.344041	0.000708684	0.0188365	0.00819823	0	92	92	184
comp2271737_c1_seq2_m.71770	0.875265	0.866796	0.000716865	0.00378947	0.00819823	0	93	93	186
comp2277729_c0_seq10_m.86207	-0.831625	-0.83147	0.000704276	0.0046015	0.00819823	0	94	94	188
comp2273142_c0_seq1_m.74744	0.357371	0.355774	0.000748586	0.0180273	0.00829683	0	95	95	190
comp2278454_c0_seq1_m.89160	-0.487105	-0.486393	0.000745858	0.0114502	0.00829683	0	96	96	192
comp2138952_c0_seq1_m.6867	-0.510021	-0.511441	0.000776292	0.0105479	0.0085152	0	97	97	194
comp2269324_c0_seq1_m.67217	0.431848	0.431603	0.000801978	0.0139765	0.00870719	0	98	98	196
comp2262339_c0_seq1_m.55609	0.504538	0.503451	0.000835575	0.0109991	0.00898032	0	99	99	198
comp2274806_c0_seq1_m.78376	-0.750324	-0.744681	0.000863847	0.00568421	0.00910033	0	100	100	200
comp2278554_c0_seq4_m.90013	-0.304205	-0.304349	0.000862148	0.0227885	0.00910033	0	101	101	202
comp2269009_c0_seq1_m.66627	0.44561	0.448347	0.000882271	0.0137961	0.00920329	0	102	102	204
comp2263896_c0_seq3_m.58065	0.431888	0.430079	0.000915214	0.0146024	0.00928652	0	103	103	206
comp2269580_c0_seq1_m.67656	0.323984	0.323767	0.000913394	0.0215329	0.00928652	0	104	104	208
comp2270148_c0_seq3_m.68661	0.436583	0.439641	0.000916433	0.0145122	0.00928652	0	105	105	210
comp2252318_c0_seq1_m.41154	0.433592	0.434324	0.000977842	0.0148731	0.00981532	0	106	106	212
comp2254675_c0_seq1_m.44244	0.451031	0.44963	0.00102682	0.0138863	0.0101844	0	107	107	214
comp2277680_c0_seq25_m.86056	-0.408432	-0.409093	0.00103376	0.0162209	0.0101844	0	108	108	216
comp2004487_c0_seq1_m.4269	0.732581	0.721481	0.00113752	0.00694455	0.0103839	0	109	109	218
comp2225664_c0_seq1_m.20382	-0.493366	-0.487555	0.00110177	0.0124427	0.0103839	0	110	110	220
comp2270797_c0_seq10_m.69872	-0.30081	-0.30126	0.00113375	0.0245855	0.0103839	0	111	111	222
comp2275822_c0_seq10_m.80745	-0.492465	-0.486454	0.00112769	0.0125329	0.0103839	0	113	112	225
comp2275893_c0_seq1_m.80933	0.914622	0.888851	0.00112459	0.00469173	0.0103839	0	114	113	227
gnl_Pdu_trscr_assembly_1_1986_m.5698	0.292929	0.292423	0.00114184	0.0250367	0.0103839	0	115	114	229
gnl_Pdu_trscr_assembly_1_200732_m.91055	0.735394	0.718238	0.00111723	0.0067641	0.0103839	0	116	115	231
gnl_Pdu_trscr_assembly_1_5530_m.58454	-0.505815	-0.501612	0.00109894	0.0118111	0.0103839	0	117	116	233
comp2275391_c0_seq1_m.79711	0.557513	0.552891	0.00115521	0.00991635	0.0104165	0	118	117	235
comp2263873_c0_seq9_m.58029	-1.3954	-1.38566	0.00118608	0.00180451	0.0104293	0	119	118	237
comp2268172_c0_seq1_m.65149	0.424475	0.425304	0.00117083	0.0157697	0.0104293	0	120	119	239
comp2275662_c1_seq10_m.80344	-0.507579	-0.513176	0.00118201	0.0120818	0.0104293	0	121	120	241
comp2277869_c0_seq29_m.86707	0.336144	0.335348	0.00119584	0.0219821	0.0104293	0	122	121	243
comp2272233_c0_seq1_m.72760	-0.30672	-0.307475	0.00121492	0.0244051	0.0105095	0	123	122	245
comp2260797_c0_seq1_m.53088	0.393346	0.391714	0.00123713	0.0175789	0.0106154	0	124	123	247
comp2278536_c1_seq38_m.89884	-0.786862	-0.781945	0.00126387	0.00604229	0.0107581	0	125	124	249
comp2269060_c1_seq1_m.66719	-0.523711	-0.515471	0.00131089	0.0117209	0.0110682	0	126	125	251
comp2273865_c0_seq2_m.76255	0.361665	0.364271	0.0013211	0.0207265	0.0110682	0	127	126	253
comp2273911_c0_seq8_m.76361	0.41512	0.417445	0.00135742	0.016672	0.0112836	0	128	127	255
comp2143411_c0_seq1_m.7656	0.431803	0.43386	0.00144775	0.0161306	0.0116436	0	129	128	257
comp2257781_c0_seq1_m.48513	-0.343566	-0.343703	0.00145545	0.0223374	0.0116436	0	130	129	259
comp2258193_c0_seq1_m.49089	0.397694	0.398936	0.00141486	0.0178468	0.0116436	0	131	130	261
comp2263277_c0_seq1_m.57091	-0.375908	-0.376625	0.00142297	0.0197321	0.0116436	0	132	131	263
comp2272782_c0_seq2_m.73955	0.568939	0.564909	0.001455	0.0103675	0.0116436	0	133	132	265
comp2270404_c0_seq3_m.69137	0.395546	0.393904	0.00147501	0.0187462	0.0116715	0	134	133	267
isotig10568_m.92324	-0.648321	-0.635496	0.00148087	0.00847556	0.0116715	0	135	134	269
comp2268869_c0_seq6_m.66344	-1.17685	-1.18663	0.00149756	0.00324812	0.0117162	0	136	135	271
comp2261876_c0_seq1_m.54865	-0.99499	-1.01171	0.00154141	0.00451128	0.0119713	0	137	136	273
comp2266005_c0_seq5_m.61322	-0.495146	-0.500367	0.00157523	0.0136156	0.0120578	0	138	137	275
comp2272437_c1_seq1_m.73204	0.953945	0.939028	0.00157211	0.00487218	0.0120578	0	139	138	277
comp2279445_c0_seq1_m.91120	-0.518139	-0.522963	0.00163395	0.0128938	0.01233	0	141	139	280
comp2265326_c0_seq3_m.60204	-0.8762	-0.90106	0.00165416	0.00541353	0.0123946	0	142	140	282
comp2257905_c0_seq1_m.48664	0.323077	0.32258	0.00169146	0.0248562	0.0125854	0	143	141	284
comp2256220_c0_seq1_m.46316	-0.543754	-0.539345	0.00172923	0.0119013	0.0126221	0	144	142	286
gnl_Pdu_trscr_assembly_1_15590_m.29311	-1.72946	-1.80944	0.00172281	0.00171429	0.0126221	0	146	143	289
comp2244437_c0_seq1_m.32653	0.40071	0.396652	0.00181391	0.0191043	0.0130405	0	147	144	291
comp2261716_c0_seq2_m.54597	-0.617496	-0.607849	0.00181116	0.00964568	0.0130405	0	148	145	293
comp2254477_c0_seq1_m.44015	0.594389	0.595438	0.00186389	0.0104577	0.0132661	0	149	146	295
comp2271595_c0_seq2_m.71452	-0.436656	-0.440508	0.00187022	0.0167622	0.0132661	0	150	147	297
comp1781461_c0_seq1_m.2253	-0.566308	-0.558166	0.00194112	0.0116306	0.0133125	0	151	148	299
comp2256041_c0_seq1_m.46046	0.365104	0.368699	0.00191858	0.0217133	0.0133125	0	153	149	302
comp2278054_c0_seq40_m.87392	-0.599976	-0.590416	0.00188931	0.0102773	0.0133125	0	155	150	305
gnl_Pdu_trscr_assembly_1_11607_m.26425	-0.381828	-0.383779	0.00193665	0.020907	0.0133125	0	156	151	307
gnl_Pdu_trscr_assembly_1_326_m.78835	-0.401568	-0.397191	0.00195934	0.0194643	0.0133125	0	157	152	309
gnl_Pdu_trscr_assembly_1_2589_m.58494	0.340432	0.341971	0.00200397	0.0243148	0.0134951	0	158	153	311
comp2251386_c0_seq2_m.40044	0.488716	0.483229	0.00210924	0.0149633	0.0137814	0	159	154	313
comp2257585_c0_seq1_m.48216	-0.439903	-0.445657	0.00209831	0.0169427	0.0137814	0	160	155	315
comp2271539_c0_seq2_m.71326	0.421161	0.426134	0.002114	0.0182979	0.0137814	0	161	156	317
comp2272691_c0_seq4_m.73750	-1.34576	-1.36624	0.00208262	0.00297744	0.0137814	0	162	157	319
comp2276805_c0_seq8_m.83380	-0.768343	-0.780197	0.0021242	0.00757331	0.0137814	0	163	158	321
comp2278376_c0_seq1_m.88768	-0.434926	-0.43318	0.00208984	0.0171231	0.0137814	0	164	159	323
comp2275701_c1_seq1_m.80440	-0.528931	-0.540265	0.00221042	0.0134352	0.0141509	0	166	160	326
comp2238188_c0_seq1_m.27576	0.706549	0.68582	0.00225874	0.00856579	0.0143054	0	168	161	329
comp2277475_c0_seq2_m.85365	-0.404156	-0.399503	0.00228719	0.0199126	0.0143998	0	169	162	331
gnl_Pdu_trscr_assembly_1_12794_m.61443	-0.893302	-0.877169	0.00231951	0.0064032	0.0145174	0	170	163	333
comp2263394_c0_seq1_m.57263	-0.385835	-0.388393	0.00250121	0.0214427	0.0152074	0	172	164	336
comp2265386_c0_seq2_m.60299	0.642242	0.659836	0.00248472	0.0100066	0.0152074	0	173	165	338
comp2272961_c0_seq1_m.74370	0.44912	0.456633	0.002466	0.0170329	0.0152074	0	174	166	340
comp2277945_c0_seq2_m.86985	-1.36687	-1.33128	0.00246296	0.00342857	0.0152074	0	175	167	342
comp2253217_c0_seq2_m.42336	0.497749	0.498387	0.00262498	0.0154117	0.0157215	0	177	168	345
comp2245053_c0_seq1_m.33185	-0.553554	-0.558365	0.00266456	0.0131645	0.0158385	0	179	169	348
comp2254206_c0_seq1_m.43646	0.376025	0.37241	0.00268286	0.0226983	0.0158587	0	180	170	350
comp2263667_c0_seq1_m.57601	0.453739	0.457787	0.00272692	0.0172133	0.015942	0	181	171	352
comp2274909_c0_seq7_m.78615	-1.6872	-1.79067	0.00282169	0.00261654	0.0162898	0	184	172	356
comp2277995_c0_seq1_m.87177	-0.726388	-0.733063	0.00283235	0.00883647	0.0162898	0	185	173	358
comp2276151_c0_seq3_m.81648	-0.37806	-0.377772	0.00299391	0.0230667	0.0169494	0	189	174	363
comp2277484_c0_seq6_m.85397	0.378593	0.379753	0.00302668	0.023157	0.0169494	0	190	175	365
comp2278509_c0_seq8_m.89637	-0.651613	-0.636534	0.00307437	0.0106382	0.0171264	0	191	176	367
comp2262281_c0_seq3_m.55504	-0.888753	-0.90279	0.00323528	0.00739286	0.017744	0	194	177	371
comp2257674_c0_seq1_m.48339	-0.982933	-1.0314	0.00327839	0.00649342	0.017797	0	195	178	373
comp2258554_c1_seq2_m.49570	-0.462582	-0.455412	0.00326463	0.0174887	0.017797	0	196	179	375
comp2269987_c0_seq2_m.68354	-0.415504	-0.422633	0.0033221	0.0210846	0.0179427	0	197	180	377
comp2239691_c0_seq1_m.28548	-0.69503	-0.672938	0.00339667	0.0097359	0.0182528	0	198	181	379
comp2272491_c1_seq4_m.73302	0.281917	0.281952	0.0010652	0.0256682	0.0103839	0.00396825	112	267	379
comp2224014_c0_seq1_m.19704	0.652755	0.66801	0.00341774	0.0110893	0.0182737	0	199	182	381
comp2222959_c0_seq1_m.19328	0.5829	0.579403	0.00352635	0.0132547	0.0185898	0	200	183	383
comp2263658_c0_seq3_m.57592	-0.432402	-0.426433	0.00351945	0.0201805	0.0185898	0	202	184	386
comp2274909_c0_seq7_m.78613	-1.67863	-1.79562	0.00353812	0.00306767	0.0185898	0	203	185	388
comp2278589_c0_seq3_m.90346	-0.27744	-0.277013	0.00160706	0.0286353	0.0122136	0.00369004	140	248	388
gnl_Pdu_trscr_assembly_1_9334_m.28552	-0.58028	-0.57106	0.00357441	0.0135254	0.018643	0	204	186	390
comp2275714_c2_seq1_m.80469	0.509981	0.497637	0.00367148	0.0159502	0.018947	0	207	187	394
comp2258609_c0_seq1_m.49647	-0.291017	-0.291575	0.00173197	0.0279013	0.0126221	0.00371747	145	250	395
comp2254167_c0_seq1_m.43587	0.463723	0.473842	0.00373978	0.0183882	0.0189813	0	208	188	396
comp2275270_c0_seq2_m.79424	0.428463	0.43171	0.0037607	0.0208167	0.0189813	0	210	189	399
comp2274137_c1_seq25_m.76929	1.02869	0.989274	0.00387105	0.00658365	0.0193451	0	213	190	403
comp2245721_c0_seq1_m.33844	0.506961	0.509802	0.00396453	0.0164013	0.019529	0	214	191	405
comp2268336_c1_seq1_m.65474	0.444446	0.453118	0.00393188	0.0198224	0.019529	0	215	192	407
comp2268441_c0_seq1_m.65632	0.567154	0.577813	0.0040266	0.0142444	0.0197434	0	217	193	410
comp1326513_c0_seq1_m.1923	0.813662	0.844092	0.0040915	0.00865602	0.0198817	0	218	194	412
comp2251594_c0_seq1_m.40214	0.461797	0.470784	0.00421345	0.0191945	0.0202856	0	220	195	415
comp2273038_c0_seq3_m.74522	-0.534767	-0.521172	0.00441558	0.01586	0.0205161	0	227	196	423
comp2269230_c0_seq2_m.67055	-0.316855	-0.314596	0.00218091	0.0269154	0.0140636	0.00384615	165	259	424
comp2273257_c0_seq9_m.74986	0.52279	0.51764	0.00439146	0.0163111	0.0205161	0	228	197	425
comp2269915_c0_seq3_m.68230	-0.314744	-0.312105	0.00263011	0.0279915	0.0157215	0.0037037	178	249	427
comp2236992_c0_seq1_m.26663	0.251013	0.250715	0.00190678	0.0321325	0.0133125	0.010274	152	275	427
comp2232290_c0_seq2_m.23637	-1.12531	-1.14499	0.00461045	0.00622274	0.0206511	0	231	198	429
comp2269793_c0_seq1_m.68039	-0.320038	-0.317996	0.00253601	0.0274549	0.0153313	0.00377358	176	254	430
comp2257939_c0_seq1_m.48703	0.446538	0.442183	0.0045318	0.0205479	0.0206511	0	233	199	432
comp2269297_c0_seq2_m.67181	0.635269	0.649225	0.00463234	0.012984	0.0206511	0	236	200	436
gnl_Pdu_trscr_assembly_1_14638_m.60097	0.333345	0.331613	0.00222105	0.0253976	0.0141509	0.00401606	167	270	437
comp2276440_c0_seq2_m.82383	-0.544081	-0.53616	0.0046483	0.0155019	0.0206511	0	238	201	439
comp2275542_c0_seq9_m.80087	-0.326759	-0.326537	0.00299829	0.0276353	0.0169494	0.00374532	188	252	440
comp2269850_c0_seq1_m.68122	-0.699945	-0.690623	0.0047816	0.0112697	0.0210232	0	242	202	444
comp2262731_c0_seq1_m.56213	-0.752703	-0.725363	0.00500956	0.010187	0.0218493	0	243	203	446
comp2271350_c0_seq18_m.70898	0.428087	0.438085	0.00501056	0.0221598	0.0218493	0	244	204	448
comp2271567_c0_seq1_m.71391	-0.588589	-0.581254	0.00512783	0.0146927	0.0220891	0	246	205	451
comp2262465_c0_seq5_m.55795	-0.946016	-0.965675	0.00535498	0.00811466	0.0227908	0	250	206	456
comp2264796_c2_seq1_m.59361	0.483453	0.487703	0.00558068	0.0195545	0.0234328	0	251	207	458
comp2141229_c0_seq1_m.7283	0.343989	0.346608	0.0036342	0.0272744	0.0188624	0.00380228	205	256	461
comp2237468_c0_seq1_m.27022	0.344405	0.340128	0.00354673	0.026735	0.0185898	0.00387597	201	261	462
comp2221095_c0_seq1_m.18558	-0.474629	-0.463416	0.00564293	0.0200028	0.0235454	0	255	208	463
comp1198575_c0_seq1_m.1066	0.345701	0.341865	0.00368612	0.0270056	0.018947	0.00383142	206	258	464
comp2271675_c0_seq2_m.71655	-0.649724	-0.673789	0.00570558	0.0133449	0.0236215	0	256	209	465
comp2279773_c0_seq1_m.91181	0.287189	0.286924	0.00314262	0.0320423	0.0173251	0.0103093	193	276	469
comp2257633_c0_seq1_m.48279	0.346466	0.344721	0.00421205	0.0275451	0.0202856	0.0037594	221	253	474
comp1194290_c0_seq1_m.781	0.876098	0.860966	0.00637662	0.00928477	0.0253161	0	267	210	477
gnl_Pdu_trscr_assembly_1_200732_m.91056	0.767375	0.737753	0.0064729	0.0111795	0.0256028	0	269	211	480
comp2278605_c1_seq8_m.90480	-0.703214	-0.680054	0.00662133	0.0126231	0.026093	0	270	212	482
comp2257070_c0_seq2_m.47513	-0.74277	-0.71191	0.00692844	0.0119915	0.0269046	0	274	213	487
comp2206512_c0_seq1_m.14012	0.368166	0.369257	0.0040922	0.0254878	0.0198817	0.004	219	269	488
comp2274912_c0_seq4_m.78634	-0.323331	-0.325861	0.00395259	0.0293496	0.019529	0.00729927	216	272	488
comp2257070_c0_seq2_m.47512	-1.23632	-1.17606	0.0073086	0.00730263	0.0278722	0	279	214	493
comp2273845_c0_seq2_m.76206	0.472365	0.471357	0.00792036	0.0216231	0.0295696	0	284	215	499
comp2278308_c1_seq12_m.88483	-0.314531	-0.315871	0.00372769	0.0301645	0.0189813	0.0107914	211	289	500
comp2256095_c0_seq1_m.46136	-0.430433	-0.432115	0.00818282	0.0246758	0.0301264	0	288	216	504
comp2271419_c1_seq1_m.71009	-0.237236	-0.237309	0.00196435	0.0326758	0.0133125	0.013468	154	357	511
comp2264743_c0_seq3_m.59295	-0.242472	-0.243027	0.00287091	0.037218	0.0164228	0.0121951	186	326	512
comp2244716_c0_seq1_m.32883	-0.31622	-0.31839	0.00465815	0.0313289	0.0206511	0.0104895	232	281	513
comp2229729_c0_seq1_m.22264	-0.514354	-0.529513	0.0087907	0.0204577	0.0314926	0	297	217	514
comp2271649_c0_seq1_m.71599	-0.380207	-0.373048	0.00559393	0.0264671	0.0234328	0.00390625	252	263	515
comp2269110_c0_seq3_m.66810	0.314039	0.314699	0.00464723	0.0316814	0.0206511	0.010453	235	280	515
comp2276719_c0_seq5_m.83124	0.557737	0.551229	0.00887817	0.018656	0.0316993	0	298	218	516
comp2277142_c0_seq6_m.84365	-0.614074	-0.634265	0.00903994	0.0164915	0.0319551	0	300	219	519
comp2274259_c0_seq1_m.77220	-0.315552	-0.316215	0.00449703	0.0311494	0.0206511	0.0105263	237	282	519
comp2276461_c0_seq7_m.82444	-0.381816	-0.387599	0.00569058	0.0263769	0.0236215	0.00392157	257	264	521
comp1196959_c0_seq2_m.1014	-0.372009	-0.372811	0.00682481	0.0278111	0.0266971	0.00373134	272	251	523
comp2257131_c0_seq2_m.47590	0.507723	0.515422	0.00989968	0.0212622	0.0343103	0	307	220	527
comp2277337_c0_seq4_m.84929	0.261055	0.261645	0.00309573	0.0355742	0.0171555	0.0125392	192	335	527
comp2273385_c0_seq1_m.75218	-0.26263	-0.263913	0.00302219	0.034938	0.0169494	0.0127389	187	340	527
comp2278630_c0_seq8_m.90809	-0.259477	-0.259007	0.00272209	0.0343111	0.015942	0.012945	182	345	527
comp2276577_c0_seq8_m.92288	-0.705046	-0.741597	0.00999199	0.0147829	0.0345178	0	308	221	529
comp2276741_c0_seq2_m.83166	0.326954	0.330695	0.00464148	0.0300742	0.0206511	0.0108303	239	290	529
comp2263822_c0_seq1_m.57945	0.463585	0.479736	0.0102823	0.0241344	0.0351779	0	309	222	531
comp2268906_c0_seq4_m.66401	-0.396253	-0.395823	0.00617233	0.025578	0.0248017	0.00398406	264	268	532
comp2278012_c0_seq11_m.87235	-0.72451	-0.679416	0.0102573	0.0143346	0.0351779	0	310	223	533
comp2261334_c1_seq1_m.54085	-0.388595	-0.388364	0.00715347	0.0270959	0.0274028	0.00381679	277	257	534
comp2226333_c0_seq1_m.20670	0.273127	0.271816	0.00249403	0.0323148	0.0152074	0.0136519	171	363	534
comp2278480_c0_seq4_m.89330	-0.665837	-0.642092	0.0102656	0.0155921	0.0351779	0	311	224	535
comp2197446_c0_seq1_m.12404	-0.252592	-0.253645	0.00443946	0.0400094	0.0205373	0.0114943	230	306	536
comp2268443_c0_seq2_m.65634	-0.272978	-0.271634	0.00282906	0.0332321	0.0162898	0.013289	183	353	536
comp2269698_c0_seq1_m.67864	-0.491223	-0.477483	0.0103496	0.0225179	0.035182	0	313	225	538
comp2277479_c0_seq1_m.85385	-0.250592	-0.249064	0.00469418	0.0412199	0.0207245	0.0112676	241	299	540
comp2277352_c0_seq3_m.84974	-0.449458	-0.433955	0.0104009	0.0249464	0.0352061	0	315	226	541
comp2253149_c0_seq1_m.42245	0.263625	0.264818	0.00387265	0.0367434	0.0193451	0.0123077	212	329	541
comp2265494_c0_seq1_m.60519	0.456494	0.458112	0.0105265	0.0244953	0.0354435	0	316	227	543
comp2143334_c0_seq2_m.7649	-0.33377	-0.338351	0.00579	0.0308806	0.0237859	0.0106007	259	284	543
comp2278534_c0_seq1_m.89879	-0.256094	-0.25717	0.00555618	0.0419342	0.0234328	0.0111111	254	294	548
comp2274541_c0_seq1_m.77862	-0.498821	-0.509823	0.0116471	0.0229765	0.037782	0	328	228	556
comp2274700_c0_seq3_m.78156	0.273571	0.272584	0.00426482	0.0359276	0.0204008	0.0124611	223	333	556
comp2236007_c0_seq2_m.26049	0.530308	0.539864	0.0118363	0.0213524	0.0379332	0	331	229	560
comp2277132_c1_seq1_m.84335	0.274981	0.277319	0.00440904	0.0361062	0.0205161	0.0124224	229	332	561
comp2274693_c0_seq1_m.78142	-0.265995	-0.268875	0.00686848	0.0420244	0.0267694	0.0110803	273	293	566
comp2187328_c0_seq1_m.10936	-0.267707	-0.266812	0.00599337	0.0400996	0.0243395	0.0114613	262	305	567
comp2272882_c0_seq14_m.74184	0.662194	0.626703	0.0124167	0.0168524	0.0390867	0	338	230	568
comp2275495_c0_seq1_m.79975	0.35714	0.35558	0.00771848	0.0302547	0.0293302	0.0107527	280	288	568
comp2272724_c0_seq1_m.73818	-0.28469	-0.285954	0.00438455	0.0346701	0.0205161	0.0128205	226	342	568
comp2275698_c0_seq5_m.80432	-0.273092	-0.27059	0.00512033	0.0374887	0.0220891	0.0120846	247	323	570
comp2262317_c0_seq2_m.55577	0.29061	0.291417	0.00427573	0.0335028	0.0204008	0.0131579	222	350	572
comp2263909_c0_seq2_m.58087	-0.277446	-0.279724	0.00531781	0.0373083	0.0227235	0.0121581	249	325	574
comp1970723_c0_seq1_m.3752	0.360146	0.35827	0.00846532	0.0307002	0.0305431	0.0106762	290	286	576
comp2247229_c0_seq1_m.35389	0.272871	0.271796	0.00584042	0.0385686	0.0238092	0.0118694	260	317	577
gnl_Pdu_trscr_assembly_1_1644_m.62862	-0.284193	-0.284724	0.00452969	0.0351156	0.0206511	0.0126984	240	339	579
comp2273501_c0_seq2_m.75506	0.277311	0.275579	0.00678009	0.0394727	0.02662	0.0116279	271	310	581
comp2253516_c0_seq4_m.42708	-0.952034	-0.912918	0.0140791	0.0122622	0.04201	0	354	231	585
comp2268336_c0_seq2_m.65472	0.301924	0.30279	0.00431503	0.0324051	0.0204242	0.0136054	225	361	586
comp2270119_c0_seq15_m.68605	-0.277717	-0.278706	0.00846824	0.0416664	0.0305431	0.0111732	292	296	588
comp2266503_c0_seq6_m.62129	-0.280572	-0.277364	0.00797915	0.0403703	0.0296847	0.0113636	286	302	588
comp2278062_c0_seq4_m.87412	0.2821	0.285936	0.00781944	0.0399192	0.0293989	0.0115274	283	307	590
comp2259918_c0_seq1_m.51762	0.281405	0.284079	0.00702998	0.0387491	0.0271996	0.0117994	275	315	590
comp2276491_c0_seq8_m.82522	0.294558	0.294044	0.00525594	0.0344915	0.0225497	0.0128617	248	343	591
comp2277816_c0_seq2_m.86536	-0.286487	-0.289092	0.0061771	0.037031	0.0248017	0.0122324	265	327	592
comp2270774_c0_seq1_m.69818	0.213832	0.21359	0.00376414	0.0446992	0.0189813	0.0188679	209	386	595
comp2275933_c0_seq1_m.81045	-0.521418	-0.527788	0.0149035	0.0236898	0.0435642	0	364	232	596
comp2278276_c0_seq16_m.88350	-0.281134	-0.283153	0.00894219	0.0414887	0.0318211	0.0112045	299	297	596
comp2277740_c0_seq2_m.86258	0.394576	0.383601	0.0112706	0.0290808	0.0371621	0.00735294	323	274	597
comp2257693_c0_seq3_m.48359	0.21399	0.213612	0.00431903	0.0477068	0.0204242	0.0182292	224	373	597
gnl_Pdu_trscr_assembly_1_1986_m.5697	-0.283639	-0.28033	0.008445	0.0402801	0.0305431	0.011396	295	303	598
comp2274537_c0_seq28_m.77857	-0.284348	-0.280138	0.00837158	0.0401898	0.0305431	0.0114286	294	304	598
comp2259963_c0_seq1_m.51818	-0.296439	-0.294671	0.00582873	0.0352058	0.0238092	0.0126582	261	338	599
comp2141997_c0_seq1_m.7386	-0.905016	-0.978575	0.0162081	0.0137058	0.0462342	0	372	233	605
comp2235681_c0_seq1_m.25791	0.538219	0.565966	0.01637	0.0235996	0.046447	0	375	234	609
comp2263661_c0_seq1_m.57595	-0.223206	-0.22359	0.00463305	0.0474389	0.0206511	0.0183246	234	375	609
gi_613484551	-0.683816	-0.673138	0.0164898	0.017937	0.0465388	0	377	235	612
comp2277088_c0_seq32_m.84183	-0.249056	-0.249265	0.00505008	0.042407	0.0219318	0.0137741	245	367	612
comp2274106_c1_seq2_m.76871	-1.28641	-1.13747	0.0168113	0.00982613	0.0473207	0	378	236	614
comp2278480_c1_seq1_m.89333	-0.656397	-0.613546	0.0170201	0.0193741	0.0476563	0	380	237	617
comp2276160_c0_seq4_m.81678	0.378411	0.386195	0.0130924	0.0317716	0.0407319	0.0104167	342	279	621
comp2279340_c0_seq1_m.91103	-0.851114	-0.893033	0.017998	0.0153214	0.0495249	0	386	238	624
comp2267558_c0_seq1_m.64038	-0.254709	-0.25309	0.00575112	0.0426767	0.0237178	0.0137363	258	366	624
comp2273595_c0_seq1_m.75667	-0.302399	-0.301123	0.0098066	0.0379361	0.0340988	0.012012	306	321	627
comp2276940_c0_seq2_m.83802	-0.562283	-0.546333	0.0195859	0.0238675	0.0519687	0	400	239	639
comp2277289_c0_seq1_m.84785	0.324177	0.32745	0.00969007	0.0352961	0.033804	0.0126183	305	337	642
comp2224448_c0_seq1_m.19874	0.308134	0.307404	0.0132832	0.0407632	0.0410852	0.0113314	344	301	645
comp2273900_c0_seq1_m.76336	0.309405	0.311623	0.0122595	0.0396513	0.0387066	0.0115942	337	309	646
comp2273647_c0_seq2_m.75785	-0.756042	-0.704118	0.020993	0.0177566	0.0543388	0	408	240	648
comp2280694_c0_seq1_m.91236	0.328643	0.322078	0.00901491	0.0338618	0.0319551	0.0130293	301	347	648
comp2276804_c0_seq1_m.83376	0.5451	0.521824	0.020692	0.024766	0.0543388	0	410	241	651
comp2279235_c0_seq1_m.91078	0.31281	0.311563	0.0118298	0.0381147	0.0379332	0.011976	332	320	652
comp2275759_c0_seq17_m.80560	0.226005	0.2268	0.00552955	0.0492641	0.0234328	0.0228426	253	399	652
comp2280536_c0_seq1_m.91231	0.499255	0.492329	0.0180133	0.026109	0.0495249	0.00395257	387	266	653
comp2276634_c1_seq3_m.82935	0.33696	0.336749	0.00967589	0.0334126	0.033804	0.0132013	304	351	655
comp2277374_c0_seq2_m.85051	-0.31585	-0.323392	0.0129394	0.0386588	0.0403739	0.0118343	341	316	657
comp2270372_c0_seq1_m.69078	0.230725	0.232162	0.00637036	0.0507152	0.0253161	0.0224439	268	392	660
comp2259211_c0_seq1_m.50658	0.231752	0.232921	0.00616767	0.0494464	0.0248017	0.0227848	263	398	661
comp2233700_c1_seq1_m.24550	-0.763541	-0.7633	0.0238384	0.0190141	0.0599595	0	423	242	665
comp2250533_c0_seq1_m.39039	-0.234066	-0.232796	0.00624959	0.0489915	0.0249984	0.0229592	266	401	667
comp2278077_c0_seq3_m.87468	0.407982	0.424761	0.0184088	0.0318618	0.0500946	0.0103806	391	278	669
comp2273778_c1_seq23_m.76059	-0.659007	-0.652474	0.024409	0.0218919	0.0606804	0	428	243	671
comp2271244_c0_seq1_m.70676	-0.352485	-0.356086	0.0104228	0.0324953	0.0352061	0.0135593	314	359	673
comp2262740_c0_seq13_m.56232	-0.263	-0.263672	0.00815456	0.0452603	0.0301264	0.0187668	289	384	673
comp1977957_c0_seq1_m.3878	-0.355603	-0.364014	0.0112814	0.032766	0.0371621	0.0134228	322	356	678
comp2250201_c0_seq1_m.38525	-0.242182	-0.243743	0.00834292	0.0513412	0.0305431	0.0222222	291	388	679
comp2268978_c0_seq1_m.66540	-0.826865	-0.892973	0.0261708	0.0185658	0.0636575	0	438	244	682
comp2261183_c0_seq1_m.53867	-0.352879	-0.356301	0.0119147	0.0333224	0.0379559	0.013245	333	352	685
comp2279536_c0_seq1_m.91140	0.325323	0.330812	0.0182819	0.0413102	0.0498767	0.011236	390	298	688
comp2275616_c0_seq2_m.80253	-0.666594	-0.614244	0.0270369	0.0226081	0.065032	0	444	245	689
comp2267169_c0_seq1_m.63315	0.352343	0.346781	0.0135554	0.0344013	0.0413265	0.0129032	348	344	692
comp2275167_c0_seq1_m.79227	-0.236765	-0.237754	0.00792042	0.0521635	0.0295696	0.0245098	285	407	692
comp1194362_c0_seq2_m.804	0.220211	0.221463	0.00708817	0.0546936	0.0273254	0.0263158	276	416	692
comp2276783_c0_seq3_m.92635	-0.328542	-0.331596	0.0196495	0.041844	0.0520076	0.0111421	402	295	697
comp2277163_c0_seq1_m.84431	0.226222	0.227512	0.00715975	0.0532556	0.0274028	0.026764	278	423	701
comp2260649_c0_seq2_m.52797	-0.252565	-0.25116	0.0105849	0.0515188	0.0355277	0.0221675	317	387	704
comp2273466_c0_seq2_m.75427	0.24176	0.24023	0.008705	0.0518872	0.031291	0.02457	296	408	704
comp2277759_c0_seq3_m.86312	-0.229404	-0.230375	0.00776728	0.0534427	0.0293989	0.026699	282	422	704
comp2277203_c0_seq4_m.84565	0.276367	0.280945	0.0117522	0.0463524	0.037892	0.0185185	330	379	709
comp2264838_c0_seq3_m.59436	0.468978	0.44865	0.0236243	0.0298083	0.0595645	0.0108696	422	291	713
comp2266233_c0_seq1_m.61658	-0.356814	-0.356227	0.0173503	0.036282	0.0482207	0.0123839	382	331	713
comp1234630_c0_seq1_m.1254	0.293059	0.287163	0.0133486	0.0440432	0.0411124	0.0162602	345	370	715
comp2226643_c0_seq1_m.20830	0.261228	0.257824	0.0103303	0.0488111	0.035182	0.0230769	312	403	715
comp2264855_c0_seq1_m.59451	0.298943	0.299755	0.0141327	0.043407	0.04201	0.013624	355	362	717
comp2275312_c0_seq8_m.79518	-0.375863	-0.367142	0.0142872	0.0325855	0.0421827	0.0135135	360	358	718
comp2228430_c0_seq1_m.21640	-0.277125	-0.276871	0.0135337	0.0481513	0.0413265	0.0181347	347	371	718
comp2277977_c1_seq3_m.87126	-0.276764	-0.278272	0.0133692	0.0480611	0.0411124	0.0181818	346	372	718
comp2274961_c0_seq5_m.78739	0.379214	0.383118	0.0155153	0.0329445	0.045228	0.0133779	365	355	720
comp2277815_c1_seq2_m.86535	0.581377	0.632895	0.0319453	0.0273647	0.0724728	0.00378788	469	255	724
comp2269231_c0_seq2_m.67056	0.372545	0.38005	0.0170173	0.0340404	0.0476563	0.012987	379	346	725
comp2272371_c0_seq1_m.73054	-0.205487	-0.206304	0.00839808	0.0609831	0.0305431	0.0365297	293	440	733
comp2265735_c0_seq4_m.60895	-0.193147	-0.193152	0.00781872	0.0633825	0.0293989	0.0426009	281	454	735
gnl_Pdu_trscr_assembly_1_6063_m.1752	0.28454	0.282999	0.0143034	0.0469859	0.0421827	0.0184211	361	377	738
comp2265370_c0_seq1_m.60276	0.196205	0.19616	0.00811635	0.0634727	0.0300899	0.0425056	287	453	740
comp2274413_c0_seq1_m.77564	-0.499032	-0.52981	0.0284245	0.0296297	0.0673579	0.0109091	449	292	741
gnl_Pdu_trscr_assembly_1_11633_m.54013	0.267479	0.267702	0.0138878	0.0511617	0.0418602	0.0222772	353	389	742
comp2241992_c0_seq1_m.30524	0.246529	0.248386	0.0115719	0.0541579	0.037653	0.0264423	326	418	744
comp2269374_c0_seq3_m.67298	-0.24771	-0.248867	0.0109178	0.0529906	0.0363857	0.0268293	320	424	744
comp2273813_c0_seq2_m.76128	-0.270741	-0.272507	0.0136569	0.0497321	0.0415171	0.02267	350	396	746
comp2261368_c1_seq1_m.54120	-0.207716	-0.208417	0.00914121	0.0620141	0.0320998	0.0408163	303	443	746
comp2200530_c0_seq1_m.13009	0.376082	0.377127	0.0231807	0.0369408	0.0587561	0.0122699	419	328	747
comp2270228_c0_seq1_m.68797	-0.390378	-0.381223	0.0193718	0.0336814	0.0517702	0.0131148	399	349	748
comp2277351_c1_seq2_m.84968	-0.230844	-0.231934	0.0113466	0.0582444	0.0372618	0.0302326	324	428	752
comp2273765_c1_seq6_m.76032	-0.545537	-0.590057	0.0344447	0.0292594	0.0763017	0.00732601	480	273	753
comp2280591_c0_seq1_m.91233	0.247351	0.246387	0.0125957	0.0550517	0.0395335	0.0261905	339	414	753
comp2278268_c0_seq9_m.88316	-0.231939	-0.229872	0.0113946	0.0581541	0.0373041	0.030303	325	429	754
comp2275769_c0_seq3_m.80583	-0.224486	-0.224526	0.0108253	0.0592566	0.0362204	0.0347222	318	437	755
comp2268473_c1_seq1_m.65668	0.374433	0.366627	0.026127	0.0382049	0.0636575	0.0119403	437	319	756
comp2277282_c0_seq11_m.84762	0.298055	0.305325	0.0164548	0.0459803	0.0465388	0.0185676	376	380	756
comp2245960_c0_seq1_m.34133	-0.249996	-0.246907	0.0121214	0.053625	0.0384991	0.0266344	335	421	756
comp2247098_c0_seq1_m.35275	-0.659704	-0.673207	0.0352311	0.0253073	0.0771314	0.00403226	486	271	757
comp2139115_c0_seq1_m.6894	-0.652312	-0.584466	0.0378252	0.0266447	0.0805625	0.00389105	499	262	761
comp2254418_c0_seq1_m.43945	0.209435	0.20811	0.0109431	0.065031	0.0363857	0.0417582	319	445	764
comp2260519_c0_seq10_m.52611	0.280913	0.275044	0.0157164	0.0489013	0.0456373	0.0230179	366	402	768
comp2274096_c1_seq4_m.76855	-0.179166	-0.179101	0.0091089	0.0712679	0.0320923	0.0467091	302	467	769
comp2263115_c0_seq2_m.56831	-0.327113	-0.338155	0.0209192	0.0430338	0.0543388	0.0136986	405	365	770
comp2273356_c0_seq1_m.75157	-0.212565	-0.212658	0.0110211	0.0639408	0.0365311	0.0421286	321	449	770
comp2278470_c0_seq2_m.89275	-0.65584	-0.684218	0.0399801	0.0268252	0.0832463	0.003861	511	260	771
gnl_Pdu_trscr_assembly_1_16681_m.81096	-0.384511	-0.376777	0.0297855	0.0388393	0.0692192	0.0117647	458	314	772
comp2266701_c0_seq3_m.62512	-0.886106	-0.927093	0.044206	0.0224276	0.089329	0	527	246	773
comp2269345_c0_seq1_m.67253	-0.280632	-0.282575	0.0173576	0.0508957	0.0482207	0.0223325	383	390	773
comp2254668_c0_seq2_m.44236	0.325963	0.327598	0.0217217	0.0438477	0.0555573	0.013587	415	360	775
comp2276648_c1_seq1_m.82962	-0.228286	-0.225524	0.0132374	0.0607876	0.041063	0.0343249	343	432	775
comp2265464_c0_seq1_m.60472	0.310156	0.305966	0.0186278	0.0450808	0.0504325	0.0188172	393	385	778
comp2261121_c0_seq1_m.53764	0.254807	0.255743	0.0158207	0.0559972	0.0457425	0.0259434	368	410	778
comp2272920_c0_seq1_m.74280	-0.284749	-0.290904	0.0181085	0.0503524	0.0495308	0.0225564	389	394	783
comp2267172_c0_seq1_m.63318	-0.239694	-0.242424	0.0140145	0.0584239	0.04201	0.0301624	356	427	783
comp2263508_c0_seq1_m.57408	-0.323267	-0.333192	0.0217004	0.0444164	0.0555573	0.0162162	416	369	785
comp2256252_c0_seq1_m.46348	-0.865798	-0.931241	0.0492556	0.0242246	0.0965156	0	542	247	789
comp2271637_c0_seq1_m.71562	-0.315243	-0.321435	0.0210049	0.0454427	0.0543388	0.0187166	407	383	790
comp2246502_c0_seq1_m.34680	0.288457	0.281434	0.0192795	0.0504427	0.0516709	0.0225	397	393	790
comp2272118_c0_seq11_m.72524	-0.425892	-0.428818	0.0294411	0.0348477	0.0691507	0.0127796	453	341	794
comp2269814_c0_seq1_m.68069	-0.20684	-0.208445	0.0117383	0.0682481	0.037892	0.0453564	329	465	794
comp2274301_c0_seq6_m.77327	-0.293487	-0.300608	0.0184793	0.0487209	0.050158	0.0231362	392	404	796
comp2271594_c0_seq8_m.71451	0.345853	0.348288	0.0252975	0.0422199	0.062255	0.0138122	433	368	801
comp2272641_c0_seq2_m.73619	-0.196598	-0.196584	0.0115531	0.0724624	0.037653	0.0487288	327	474	801
comp2271753_c0_seq2_m.71801	-0.424156	-0.445156	0.0318871	0.03575	0.0724728	0.0125	468	334	802
comp2234809_c0_seq1_m.25266	0.267862	0.272058	0.0176108	0.0540677	0.0487376	0.026506	384	419	803
comp2275853_c0_seq1_m.80817	-0.201925	-0.20189	0.0118926	0.0708985	0.0379559	0.0469083	334	469	803
comp2273204_c0_seq26_m.74869	-0.22399	-0.22439	0.0140618	0.0638506	0.04201	0.0422222	357	450	807
comp2275974_c0_seq18_m.81146	-0.777894	-0.702277	0.0495851	0.0262867	0.0969827	0.00393701	544	265	809
comp2273028_c0_seq3_m.74502	-0.410314	-0.396587	0.0371139	0.0392923	0.0795356	0.0116959	497	312	809
comp2276936_c0_seq3_m.83786	0.406052	0.417849	0.0401815	0.0411297	0.0835022	0.0112994	512	300	812
comp2250470_c0_seq1_m.38949	0.226225	0.229084	0.0144478	0.063563	0.0424654	0.0424107	362	452	814
gnl_Pdu_trscr_assembly_1_1514_m.69841	-0.417322	-0.435148	0.0387476	0.0390179	0.0814771	0.0117302	506	313	819
comp2277951_c0_seq2_m.87004	-0.445408	-0.454789	0.0349545	0.035484	0.0770012	0.0125786	483	336	819
comp2261428_c0_seq1_m.54200	-0.23017	-0.229616	0.0161085	0.064031	0.0461981	0.0420354	371	448	819
comp2271755_c0_seq2_m.71808	0.30404	0.30009	0.0231932	0.0490818	0.0587561	0.0229008	420	400	820
comp2278161_c0_seq3_m.87805	-0.219935	-0.217698	0.0145877	0.0668355	0.0427585	0.0433839	363	457	820
comp2266801_c0_seq2_m.62707	0.21086	0.212007	0.0137481	0.069797	0.0416753	0.0471092	351	471	822
comp2274278_c0_seq6_m.77267	0.218005	0.217798	0.014312	0.0675226	0.0421827	0.0454545	359	466	825
comp2274888_c0_seq2_m.78557	-0.609003	-0.551733	0.0492123	0.0310592	0.0965156	0.0105634	543	283	826
comp2278378_c0_seq4_m.88778	-0.588337	-0.527048	0.0508854	0.0319521	0.0984402	0.0103448	550	277	827
comp2277083_c0_seq3_m.84173	-0.331542	-0.33049	0.0295254	0.0476165	0.069196	0.0182768	454	374	828
comp2248226_c3_seq1_m.36365	0.258121	0.262633	0.0194138	0.0580639	0.0517702	0.0303738	398	430	828
comp2279748_c0_seq1_m.91174	0.275699	0.280576	0.0209405	0.0546034	0.0543388	0.0263789	412	417	829
comp2258619_c0_seq2_m.49656	0.276959	0.282754	0.0225119	0.0552321	0.0574013	0.0260664	418	412	830
comp2274446_c0_seq19_m.77642	-0.250967	-0.249426	0.0191455	0.0596165	0.0514416	0.0345622	396	435	831
comp2272876_c0_seq2_m.74167	0.477276	0.506311	0.0344829	0.0331419	0.0763017	0.0133333	479	354	833
comp2276295_c0_seq1_m.82012	0.161779	0.161736	0.0122129	0.0813788	0.0386741	0.0645161	336	499	835
comp2271257_c1_seq1_m.70699	-0.641092	-0.599727	0.0515064	0.0305216	0.0994605	0.0107143	551	287	838
comp2267968_c0_seq2_m.64758	-0.344499	-0.339185	0.0303347	0.04589	0.0703183	0.018617	459	381	840
comp2269421_c0_seq7_m.67382	0.190964	0.192208	0.0138784	0.078188	0.0418602	0.0529532	352	488	840
comp2272435_c0_seq2_m.73201	-0.339885	-0.355563	0.031222	0.0471635	0.0714414	0.0183727	465	376	841
comp2276966_c0_seq13_m.83854	-0.189191	-0.189111	0.0135229	0.0786588	0.0413265	0.0547667	349	494	843
comp2265923_c0_seq1_m.61202	-0.446325	-0.417095	0.0484318	0.0398289	0.0961407	0.0115607	536	308	844
comp2276272_c0_seq2_m.81963	-0.345849	-0.334031	0.0306763	0.0457124	0.0707342	0.0186667	463	382	845
comp2279272_c0_seq1_m.91086	-0.208491	-0.208931	0.015978	0.0740141	0.0460634	0.0503145	370	475	845
comp2277134_c1_seq4_m.84342	-0.191975	-0.193293	0.014135	0.0780977	0.04201	0.0530612	358	489	847
comp2277388_c0_seq8_m.85093	-0.238112	-0.240877	0.0195769	0.0643844	0.0519687	0.0419426	401	447	848
comp2140166_c0_seq1_m.7086	0.204331	0.203878	0.0160183	0.0755301	0.0460634	0.0518672	369	482	851
comp2265029_c1_seq4_m.59734	0.270101	0.265772	0.0235128	0.0578863	0.0594244	0.030445	421	431	852
comp2275153_c0_seq1_m.79199	-0.168477	-0.168586	0.012692	0.0844474	0.0397183	0.0714286	340	512	852
comp2272807_c0_seq4_m.74003	-0.203734	-0.202285	0.0163123	0.0759944	0.0464072	0.0516529	374	480	854
comp2214888_c0_seq1_m.16124	-0.222038	-0.220189	0.0180653	0.0703421	0.0495308	0.0470085	388	470	858
comp2243632_c0_seq1_m.31907	0.293658	0.289326	0.0266007	0.0539774	0.0643254	0.02657	440	420	860
comp2271307_c0_seq1_m.70799	0.288212	0.287193	0.0297955	0.05636	0.0692192	0.0258824	456	409	865
comp2275610_c0_seq1_m.80236	-0.253909	-0.247757	0.0246405	0.0627218	0.0610764	0.0406321	429	441	870
comp2268942_c0_seq5_m.66483	-0.489326	-0.483871	0.0490445	0.0363722	0.0964572	0.0123457	541	330	871
comp2261047_c0_seq1_m.53653	-0.387023	-0.369042	0.0395099	0.0433167	0.0825905	0.0136612	509	364	873
comp2257282_c0_seq1_m.47769	0.239957	0.237621	0.021544	0.0657481	0.0553692	0.0437637	414	461	875
comp2270650_c0_seq1_m.69588	0.299485	0.303186	0.03078	0.0549615	0.0707342	0.026253	461	415	876
comp2271636_c1_seq22_m.71557	0.234437	0.236405	0.0212664	0.0683383	0.0547881	0.0452586	413	464	877
comp1194294_c0_seq1_m.785	0.222093	0.219122	0.0202856	0.0728252	0.0534256	0.0486258	404	473	877
comp2277005_c0_seq3_m.83943	0.334768	0.349993	0.0344399	0.0495367	0.0763017	0.0227273	481	397	878
comp2262362_c0_seq1_m.55645	0.26584	0.269258	0.0273757	0.0606974	0.0654556	0.0344037	445	433	878
comp2274031_c0_seq3_m.76707	-0.184712	-0.18393	0.0157414	0.0845376	0.0456373	0.0712871	367	511	878
comp2261983_c0_seq1_m.55047	-0.196969	-0.197837	0.0176353	0.0810912	0.0487376	0.0626263	385	495	880
comp2132126_c0_seq4_m.6558	-0.336189	-0.343482	0.0366061	0.0508055	0.0791644	0.0223881	492	391	883
comp2276528_c1_seq4_m.82615	-0.770298	-0.792231	0.068951	0.0307904	0.122273	0.0106383	600	285	885
comp2270905_c1_seq5_m.70069	0.507282	0.545326	0.0601819	0.0383806	0.11246	0.0119048	569	318	887
comp2261971_c0_seq1_m.55022	-0.263427	-0.255928	0.0280016	0.0621043	0.0665039	0.040724	447	442	889
comp2233777_c0_seq1_m.24586	-0.180347	-0.179697	0.0171821	0.0893825	0.0479835	0.0718447	381	515	896
comp2271906_c0_seq1_m.72107	-0.308268	-0.318225	0.0351059	0.0551419	0.077105	0.0261283	485	413	898
comp2277332_c0_seq1_m.84919	0.155279	0.155387	0.0161673	0.0970517	0.0462342	0.0852273	373	528	901
comp2268857_c0_seq2_m.66328	-0.244321	-0.245994	0.0271374	0.0691438	0.065032	0.0450644	443	462	905
comp2242407_c0_seq1_m.30845	-0.387186	-0.373983	0.0467277	0.0467152	0.0937339	0.0184697	530	378	908
comp2277176_c0_seq2_m.84466	-0.348614	-0.331679	0.0403667	0.0501748	0.0835607	0.0226131	514	395	909
comp2277956_c0_seq3_m.87021	-0.261317	-0.253777	0.0313646	0.0654671	0.0716135	0.0416667	466	444	910
comp2274783_c0_seq9_m.78326	-0.35395	-0.335779	0.0388554	0.0486306	0.0815427	0.0231959	507	405	912
comp2277675_c0_seq81_m.86041	-0.199976	-0.200856	0.021041	0.0830376	0.0543388	0.0678643	411	501	912
comp2266926_c0_seq2_m.62890	0.22663	0.224274	0.0262049	0.0757274	0.0636575	0.0517598	436	481	917
comp2266931_c0_seq5_m.62893	-0.561489	-0.556482	0.0680513	0.0373985	0.121488	0.0121212	596	324	920
comp2142866_c0_seq1_m.7576	0.19975	0.202218	0.0225505	0.0853534	0.0574013	0.0707269	417	507	924
comp2268194_c0_seq1_m.65186	0.184965	0.18603	0.0209561	0.0926551	0.0543388	0.0751445	406	519	925
comp2270845_c1_seq1_m.69967	-0.221107	-0.225081	0.026335	0.077656	0.063828	0.0531697	439	490	929
gnl_Pdu_trscr_assembly_1_1453_m.85764	-0.20147	-0.200916	0.0238936	0.0857368	0.0599595	0.0705882	424	506	930
comp2263347_c0_seq2_m.57195	0.211012	0.21444	0.025836	0.0820056	0.0631944	0.0641283	435	496	931
comp2277311_c0_seq3_m.84858	-0.591735	-0.527765	0.0807366	0.0393825	0.137008	0.0116618	627	311	938
comp2272683_c0_seq1_m.73725	-0.162317	-0.161913	0.0188966	0.102616	0.0509679	0.0942699	394	545	939
comp2276593_c0_seq3_m.82791	-0.157751	-0.157772	0.0189214	0.106232	0.0509679	0.100548	395	547	942
comp2277114_c1_seq1_m.84278	-0.38194	-0.402698	0.0485877	0.0484352	0.0962706	0.0232558	537	406	943
comp2254376_c0_seq1_m.43911	-0.337862	-0.330145	0.0422663	0.0529004	0.08665	0.0268949	519	425	944
comp2268289_c0_seq5_m.65382	0.253777	0.260076	0.0344506	0.0709887	0.0763017	0.0468085	477	468	945
comp2275191_c1_seq2_m.79282	-0.17183	-0.171238	0.0207583	0.100349	0.0543388	0.0893855	409	536	945
comp2268964_c0_seq1_m.66515	-0.299403	-0.286044	0.0402841	0.0594389	0.0835523	0.034642	513	436	949
comp2260997_c1_seq7_m.53574	0.278912	0.276864	0.0371515	0.0631852	0.0795356	0.0426966	496	455	951
comp2275068_c1_seq1_m.78996	0.21418	0.21044	0.0291737	0.0837867	0.0687682	0.0697211	451	502	953
comp2261980_c0_seq3_m.55041	-0.291867	-0.302354	0.0405807	0.0610733	0.0836779	0.0364465	515	439	954
comp2270085_c0_seq9_m.68531	-0.264059	-0.262489	0.0368454	0.0686927	0.0793627	0.0451613	493	463	956
comp2107035_c0_seq2_m.6021	0.188633	0.189557	0.025335	0.0952754	0.062255	0.0820611	432	524	956
comp2271871_c0_seq8_m.72023	-0.147632	-0.147816	0.0201801	0.111804	0.0532794	0.107914	403	556	959
comp2265703_c0_seq1_m.60844	0.242355	0.23564	0.0342197	0.0752528	0.0763017	0.0520833	476	484	960
comp2138816_c0_seq1_m.6842	-0.303682	-0.310732	0.0455211	0.0606071	0.0917319	0.0344828	528	434	962
comp2272519_c1_seq3_m.73361	-0.272999	-0.265528	0.0384529	0.0662951	0.0811783	0.0436681	503	460	963
comp2271916_c0_seq1_m.72122	-0.179232	-0.179993	0.024153	0.0999831	0.0603258	0.0897196	425	538	963
comp2254346_c0_seq1_m.43876	-0.645925	-0.623038	0.0864771	0.0378459	0.143097	0.0120482	642	322	964
comp2270576_c0_seq1_m.69463	-0.208454	-0.212595	0.0311853	0.0882782	0.0714414	0.0701754	464	503	967
comp2278238_c1_seq2_m.88191	0.286162	0.282171	0.0419897	0.0637603	0.0863616	0.0423163	518	451	969
comp2269201_c0_seq1_m.67004	0.244656	0.239981	0.0351466	0.0749831	0.077105	0.0521921	484	485	969
comp2271113_c0_seq5_m.70438	-0.286609	-0.295729	0.0434635	0.0644746	0.0882225	0.0418502	524	446	970
comp2268391_c0_seq1_m.65566	0.188808	0.187469	0.0269868	0.0969615	0.065032	0.085389	442	529	971
comp2235922_c0_seq1_m.25983	0.204411	0.203538	0.0307384	0.0910348	0.0707342	0.0733591	460	517	977
comp1876805_c0_seq1_m.2339	-0.167806	-0.16903	0.0243857	0.109695	0.0606804	0.104882	427	551	978
gnl_Pdu_trscr_assembly_1_20144_m.60515	0.171321	0.172844	0.0246831	0.107554	0.0610764	0.10219	430	550	980
comp2278222_c0_seq3_m.88116	0.224671	0.228293	0.0348183	0.0824643	0.0768602	0.066	482	500	982
comp2258437_c0_seq2_m.49437	-0.285893	-0.280973	0.0457782	0.0665677	0.0920755	0.043573	529	459	988
comp2276159_c1_seq5_m.81677	-0.315319	-0.305762	0.0529068	0.0611635	0.101795	0.0363636	553	438	991
comp2278076_c0_seq2_m.87463	-0.299829	-0.293323	0.0480244	0.0630949	0.0955102	0.0427928	535	456	991
comp2276498_c2_seq1_m.82546	-0.368588	-0.359652	0.0625056	0.0558148	0.11408	0.0260047	582	411	993
comp1953876_c0_seq1_m.3493	-0.210065	-0.208728	0.0343337	0.0908477	0.0763017	0.073501	475	518	993
comp2276426_c0_seq2_m.82339	-0.251386	-0.244228	0.0391726	0.0748929	0.0820465	0.0523013	508	486	994
gnl_Pdu_trscr_assembly_1_15577_m.47320	0.151609	0.151405	0.0251144	0.121649	0.0619993	0.123239	431	566	997
comp1953077_c0_seq1_m.3483	0.222106	0.217588	0.036056	0.0852632	0.078293	0.0708661	490	508	998
comp2275857_c0_seq4_m.80830	0.140762	0.14076	0.024097	0.123596	0.0603258	0.125654	426	572	998
gnl_Pdu_trscr_assembly_1_3867_m.65412	-0.841463	-1.00351	0.0928463	0.0337716	0.151516	0.0130719	652	348	1000
comp2250906_c0_seq2_m.39444	0.167151	0.166406	0.0271119	0.113613	0.065032	0.11449	441	559	1000
comp1971911_c0_seq1_m.3786	-0.198031	-0.198665	0.0330152	0.0965799	0.0745696	0.0855513	471	530	1001
comp2266830_c0_seq2_m.62753	0.171367	0.173089	0.027954	0.111894	0.0665039	0.10772	448	555	1003
comp2269601_c0_seq3_m.67709	-0.197905	-0.196345	0.0344935	0.0977575	0.0763017	0.0849057	478	526	1004
comp2276968_c0_seq3_m.83862	-0.176299	-0.176439	0.0292136	0.109605	0.0687682	0.105072	452	552	1004
comp2268046_c1_seq1_m.64874	0.191648	0.190557	0.032431	0.100439	0.0734182	0.0892193	470	535	1005
comp2217087_c0_seq1_m.16899	-0.152161	-0.151671	0.0254685	0.122392	0.0624388	0.12478	434	571	1005
comp2252746_c0_seq1_m.41651	0.195128	0.196695	0.0332527	0.098328	0.074801	0.0883459	473	533	1006
comp2260150_c0_seq1_m.52048	-0.185218	-0.184139	0.0316249	0.105315	0.0720533	0.0989011	467	546	1013
comp2263250_c0_seq1_m.57052	0.250094	0.244688	0.0434208	0.0772068	0.0882225	0.0533881	523	492	1015
comp2273576_c0_seq1_m.75622	-0.18865	-0.189194	0.0330797	0.103303	0.0745696	0.0939227	472	543	1015
comp2261373_c0_seq1_m.54127	-0.170314	-0.171874	0.0297824	0.114371	0.0692192	0.115865	455	561	1016
comp2263612_c1_seq1_m.57550	-0.155935	-0.154908	0.0277088	0.123418	0.0661035	0.125874	446	573	1019
comp2261479_c0_seq1_m.54252	-0.272148	-0.268007	0.0501266	0.0738383	0.0975041	0.0504202	547	476	1023
comp2267732_c0_seq2_m.64331	0.218872	0.222019	0.0397763	0.0902058	0.0829843	0.0717054	510	514	1024
comp2268874_c0_seq62_m.66354	-0.146483	-0.1466	0.0287447	0.132537	0.0679653	0.141136	450	579	1029
comp2207063_c0_seq1_m.14108	0.231271	0.225841	0.0442447	0.0861062	0.089329	0.0704501	526	505	1031
comp2277982_c0_seq2_m.87136	-0.196279	-0.198949	0.0372841	0.101186	0.0796591	0.0907407	498	540	1038
comp2275144_c0_seq3_m.79172	-0.154334	-0.154438	0.0307267	0.129893	0.0707342	0.136915	462	577	1039
comp2266882_c0_seq1_m.62832	-0.206647	-0.208454	0.0405064	0.0974023	0.0836779	0.0850662	516	527	1043
comp2253409_c0_seq1_m.42588	-0.200389	-0.204714	0.0385679	0.0997171	0.0812599	0.0898876	505	539	1044
comp2267718_c0_seq1_m.64309	-0.184291	-0.184716	0.0363183	0.110706	0.0787019	0.106498	491	554	1045
comp2274299_c0_seq4_m.77323	-0.140598	-0.140687	0.0297701	0.1375	0.0692192	0.146508	457	588	1045
comp2277769_c0_seq5_m.86350	0.175469	0.173091	0.0354839	0.116914	0.0775253	0.117229	487	564	1051
comp2274242_c0_seq2_m.77187	0.180308	0.179265	0.0369215	0.114012	0.0793627	0.116071	494	562	1056
comp2276492_c1_seq1_m.82528	-0.258574	-0.253036	0.058321	0.0819154	0.11019	0.064257	565	497	1062
comp2229921_c0_seq1_m.22367	-0.200196	-0.201253	0.0425644	0.103485	0.0870933	0.09375	520	542	1062
comp2262185_c0_seq1_m.55318	-0.271456	-0.284185	0.0604796	0.0787491	0.112697	0.0546559	571	493	1064
comp2232641_c0_seq7_m.23875	0.247871	0.24801	0.0585127	0.0867538	0.11019	0.0703125	561	504	1065
comp2272495_c0_seq1_m.73308	0.145294	0.146189	0.0336344	0.140599	0.0755	0.153457	474	591	1065
comp2260451_c0_seq1_m.52482	-0.195892	-0.199021	0.0429399	0.107916	0.0876931	0.102004	521	549	1070
comp2263070_c0_seq1_m.56781	0.148676	0.149796	0.0356764	0.140421	0.0776271	0.153716	488	592	1080
comp2277413_c0_seq4_m.85165	-0.153164	-0.152527	0.0368607	0.137687	0.0793627	0.146259	495	587	1082
comp2279450_c0_seq1_m.91124	-0.160871	-0.162339	0.0380704	0.132356	0.0807719	0.141623	502	581	1083
comp2269627_c0_seq2_m.67749	-0.315996	-0.311557	0.076191	0.0730883	0.131603	0.0485232	616	472	1088
comp2274926_c0_seq2_m.78666	-0.208499	-0.204341	0.049909	0.102891	0.0972586	0.0940959	545	544	1089
comp2277815_c0_seq5_m.86532	0.464061	0.532354	0.104196	0.0573224	0.166713	0.028169	665	426	1091
comp2277388_c0_seq8_m.85092	-0.218639	-0.211222	0.0568262	0.100894	0.108406	0.0890538	558	534	1092
gnl_Pdu_trscr_assembly_1_1512_m.69248	-0.236129	-0.228931	0.0607203	0.0942434	0.112751	0.0785441	573	520	1093
comp2270952_c0_seq1_m.70164	-0.299907	-0.297482	0.0764837	0.076453	0.131894	0.0514403	617	478	1095
comp2250281_c0_seq1_m.38657	0.213159	0.210974	0.0553645	0.103932	0.10614	0.093578	555	541	1096
comp2267408_c0_seq1_m.63775	0.137241	0.13668	0.0356269	0.149532	0.0776271	0.169967	489	608	1097
comp2228369_c0_seq1_m.21627	-0.191611	-0.191441	0.0487165	0.114936	0.0963463	0.115658	538	560	1098
comp2268477_c0_seq2_m.65672	0.225002	0.21788	0.0602463	0.099344	0.11246	0.0881801	568	532	1100
comp2272320_c0_seq1_m.72954	-0.143441	-0.144425	0.0381085	0.146858	0.0807719	0.163333	501	600	1101
comp1199432_c0_seq1_m.1095	0.238909	0.231493	0.0625083	0.0940611	0.11408	0.0786948	581	521	1102
comp2268029_c2_seq11_m.64856	0.26227	0.275521	0.0662563	0.0848036	0.118882	0.0711462	593	510	1103
comp2249377_c0_seq1_m.37601	-0.296527	-0.284675	0.0757517	0.077297	0.131057	0.0532787	615	491	1106
comp2266714_c1_seq1_m.62532	0.25451	0.254993	0.0683449	0.0892923	0.121773	0.0719844	597	516	1113
comp2211414_c0_seq1_m.14992	-0.237604	-0.234906	0.0658673	0.0959182	0.118583	0.0819048	591	523	1114
comp2273216_c0_seq3_m.74900	-0.136934	-0.136498	0.0378583	0.155535	0.0805625	0.179903	500	615	1115
comp2262300_c0_seq2_m.55547	-0.155788	-0.157619	0.0430648	0.141979	0.0877796	0.154622	522	595	1117
comp2275358_c0_seq1_m.79627	-0.13802	-0.137647	0.0383997	0.154527	0.0811783	0.179153	504	613	1117
comp2265255_c2_seq1_m.60100	-0.314981	-0.336681	0.0859882	0.0763628	0.142732	0.0515464	641	479	1120
comp2205419_c0_seq2_m.13843	-0.273423	-0.279411	0.0751655	0.0848938	0.130467	0.0710059	613	509	1122
comp2272254_c0_seq4_m.72822	-0.168988	-0.170814	0.0489433	0.135265	0.0964364	0.143836	540	583	1123
comp2278518_c0_seq1_m.89695	-0.149187	-0.14812	0.0435308	0.148141	0.0882225	0.165837	525	602	1127
gnl_Pdu_trscr_assembly_1_16061_m.43221	-0.170825	-0.167468	0.050318	0.134344	0.0976977	0.14433	548	585	1133
comp2270385_c0_seq11_m.69105	-0.331611	-0.316683	0.0927843	0.0754398	0.151516	0.0519751	651	483	1134
comp2272378_c0_seq1_m.73076	0.152263	0.154203	0.0473657	0.148802	0.0945536	0.168874	533	605	1138
comp2275467_c0_seq60_m.79906	0.137551	0.137446	0.0420444	0.161983	0.0863616	0.187801	517	623	1140
comp2266755_c0_seq1_m.62616	0.319911	0.339475	0.0933436	0.0782782	0.151973	0.0528455	654	487	1141
comp2268417_c0_seq2_m.65592	-0.363776	-0.325411	0.104511	0.073563	0.166966	0.0505263	666	477	1143
comp2275523_c0_seq29_m.80039	-0.259681	-0.272324	0.0792883	0.0929558	0.135491	0.0788462	624	522	1146
comp2277972_c0_seq17_m.87106	0.154384	0.153684	0.0498717	0.149076	0.0972586	0.168595	546	604	1150
comp2262927_c0_seq2_m.56544	0.145844	0.14621	0.0472584	0.158677	0.0945168	0.185784	532	619	1151
comp2276710_c0_seq15_m.83110	-0.136846	-0.136748	0.0467788	0.167932	0.0937339	0.200318	531	629	1160
comp2208429_c0_seq1_m.14341	0.25161	0.261174	0.0841018	0.0981325	0.140478	0.086629	635	531	1166
comp2275191_c0_seq1_m.79281	-0.137004	-0.136922	0.0508824	0.172284	0.0984402	0.206951	549	633	1182
comp2247176_c0_seq3_m.35337	0.52579	0.641978	0.151465	0.0666579	0.221676	0.0434783	727	458	1185
comp2269848_c0_seq4_m.68115	-0.350739	-0.311383	0.120001	0.0815564	0.185853	0.0643863	687	498	1185
comp2275027_c0_seq1_m.78898	-0.124698	-0.124669	0.0479898	0.18383	0.0955102	0.213846	534	652	1186
comp2269593_c0_seq3_m.67692	-0.121677	-0.121682	0.048812	0.188047	0.0963561	0.215596	539	655	1194
comp2201786_c0_seq1_m.13247	0.261805	0.273584	0.0970244	0.100258	0.156682	0.0895522	658	537	1195
comp2280178_c0_seq1_m.91219	-0.430758	-0.357724	0.168559	0.0843571	0.243347	0.0715706	737	513	1250
comp2258014_c0_seq1_m.48797	-0.438713	-0.358715	0.198733	0.0951852	0.276941	0.082218	763	525	1288

## Sheet: PM_NM_Male vs M_NM_Male
	limma.logFC	rots.logFC	limma.pvalue	rots.pvalue	limma.adj.pvalue	rots.adj.pvalue	limma.rank	rots.rank	rank.sum
comp2242933_c0_seq1_m.31351	2.01384	2.02347	6.76e-07	9.02256e-05	0.000719455	0	1	1	2
comp2272698_c0_seq4_m.73763	1.04682	1.04595	5.69e-06	0.000631579	0.00142326	0	2	2	4
comp2277815_c1_seq2_m.86535	0.84487	0.847187	6.69e-06	0.00162406	0.00142326	0	3	3	6
gene17_m.92593	1.58033	1.59432	6.15e-06	0.000180451	0.00142326	0	4	4	8
gnl_Pdu_trscr_assembly_1_5530_m.58454	-0.649555	-0.649422	6.44e-06	0.00279699	0.00142326	0	5	5	10
comp2266280_c0_seq1_m.61789	0.561887	0.562406	1.03e-05	0.00432801	0.00158946	0	6	6	12
comp2278062_c0_seq4_m.87412	0.658918	0.65995	1.05e-05	0.00306767	0.00158946	0	7	7	14
comp2261623_c0_seq1_m.54431	-0.831546	-0.830888	1.91e-05	0.00180451	0.00196795	0	8	8	16
comp2272319_c0_seq24_m.72950	1.55706	1.57826	2.4e-05	0.000270677	0.00196795	0	9	9	18
comp2275110_c1_seq5_m.79090	1.0032	1.00896	1.82e-05	0.000992481	0.00196795	0	10	10	20
comp2276277_c0_seq18_m.81972	0.672322	0.672586	2.18e-05	0.00342575	0.00196795	0	11	11	22
comp2277282_c0_seq11_m.84762	0.952867	0.953211	1.48e-05	0.00117293	0.00196795	0	12	12	24
comp2277947_c0_seq1_m.86990	0.628663	0.628722	2.27e-05	0.00378665	0.00196795	0	13	13	26
comp2273038_c0_seq3_m.74522	-0.648099	-0.649537	2.67e-05	0.0036062	0.00202762	0	14	14	28
comp2256095_c0_seq1_m.46136	-0.436674	-0.436515	4.01e-05	0.0100959	0.00253152	0	15	15	30
comp2265656_c0_seq3_m.60780	-0.994055	-0.997721	4.04e-05	0.00153383	0.00253152	0	16	16	32
comp2276768_c0_seq2_m.83249	0.782878	0.788209	3.65e-05	0.00225564	0.00253152	0	17	17	34
gnl_Pdu_trscr_assembly_1_16681_m.81096	-0.469035	-0.468603	4.61e-05	0.00892293	0.00272381	0	18	18	36
comp2276159_c1_seq5_m.81677	-0.42344	-0.423121	5.77e-05	0.0115254	0.00292344	0	19	19	38
comp2277203_c0_seq4_m.84565	0.457702	0.458262	5.54e-05	0.00991541	0.00292344	0	20	20	40
comp2277416_c0_seq3_m.85174	-0.682836	-0.679169	5.46e-05	0.00351598	0.00292344	0	21	21	42
comp2232805_c0_seq1_m.23974	0.642617	0.641373	7.05e-05	0.00450846	0.00313275	0	22	22	44
comp2261362_c0_seq2_m.54116	-0.570657	-0.571446	6.91e-05	0.00594925	0.00313275	0	23	23	46
comp2276491_c0_seq8_m.82522	0.458765	0.459132	7.07e-05	0.0101861	0.00313275	0	24	24	48
comp2271737_c1_seq2_m.71770	0.802813	0.800236	7.39e-05	0.00243609	0.00314513	0	25	25	50
comp2271994_c0_seq2_m.72269	-0.921324	-0.930919	8.11e-05	0.00189474	0.00331721	0	26	26	52
comp2276871_c0_seq8_m.83582	0.512407	0.51123	8.49e-05	0.00793421	0.0033441	0	27	27	54
comp2234282_c0_seq1_m.24908	0.701087	0.702632	9.2e-05	0.00369643	0.00334951	0	28	28	56
comp2275662_c1_seq10_m.80344	-0.549422	-0.550298	9.31e-05	0.0068515	0.00334951	0	29	29	58
comp2277869_c0_seq29_m.86707	0.479116	0.4806	9.44e-05	0.00973496	0.00334951	0	30	30	60
comp2260797_c0_seq1_m.53088	0.433495	0.433069	0.000105856	0.0123346	0.00363325	0	31	31	62
comp2257395_c0_seq4_m.47951	-1.57756	-1.57297	0.000117112	0.000360902	0.00366492	0	32	32	64
comp2268906_c0_seq4_m.66401	-0.47206	-0.471997	0.000116923	0.0106316	0.00366492	0	33	33	66
comp2271381_c1_seq12_m.70942	-0.397998	-0.397361	0.00011085	0.0142143	0.00366492	0	34	34	68
comp2268964_c0_seq1_m.66515	-0.559002	-0.561171	0.00012168	0.00703195	0.003688	0	35	35	70
comp2275714_c2_seq1_m.80469	0.545852	0.542785	0.000124782	0.00766353	0.003688	0	36	36	72
comp2254477_c0_seq1_m.44015	0.548122	0.549671	0.000131825	0.00757331	0.00379087	0	37	37	74
comp2229729_c0_seq1_m.22264	-0.60163	-0.597535	0.000143446	0.00585902	0.00381565	0	38	38	76
comp2269060_c0_seq1_m.66718	-0.494452	-0.496899	0.00013843	0.00955451	0.00381565	0	39	39	78
comp2273926_c0_seq5_m.76421	-1.12955	-1.15007	0.000141347	0.00144361	0.00381565	0	40	40	80
comp2262137_c0_seq3_m.92268	-1.50112	-1.52346	0.000151404	0.000451128	0.00392911	0	41	41	82
comp2279213_c0_seq1_m.91075	0.394396	0.395092	0.000155498	0.0153844	0.00393927	0	42	42	84
comp2243258_c0_seq1_m.31584	-0.805033	-0.804296	0.000174146	0.00324812	0.0041543	0	44	43	87
comp2262137_c0_seq4_m.55246	-1.50073	-1.52673	0.000188612	0.000541353	0.0041543	0	45	44	89
comp2272087_c1_seq4_m.72458	-0.400336	-0.401234	0.000186308	0.0152942	0.0041543	0	47	45	92
comp2278587_c0_seq14_m.90327	-0.572553	-0.569181	0.000191317	0.00730263	0.0041543	0	49	46	95
comp2277972_c0_seq17_m.87106	0.456493	0.455493	0.000207297	0.0121541	0.00424162	0	51	47	98
comp2278509_c0_seq8_m.89637	-0.632614	-0.635376	0.000207261	0.00559117	0.00424162	0	52	48	100
comp1197507_c0_seq1_m.1032	0.425222	0.425262	0.00022088	0.0136776	0.00438271	0	53	49	102
comp1945561_c0_seq2_m.3380	-0.6194	-0.621814	0.000255398	0.00621992	0.00494078	0	55	50	105
comp2267571_c0_seq4_m.64058	0.408971	0.409149	0.000267736	0.0156551	0.00508697	0	56	51	107
comp2239691_c0_seq1_m.28548	-0.904814	-0.894098	0.000283003	0.00252632	0.00528272	0	57	52	109
comp2272961_c0_seq1_m.74370	0.608802	0.613061	0.000288292	0.0064906	0.00528867	0	58	53	111
comp2278077_c0_seq3_m.87468	0.480275	0.479784	0.000297921	0.0116156	0.00537269	0	59	54	113
comp2261395_c0_seq1_m.54150	-0.472854	-0.476309	0.000311145	0.0118863	0.00542719	0	60	55	115
comp2270279_c0_seq7_m.68904	0.462119	0.459786	0.000310781	0.0126908	0.00542719	0	61	56	117
comp2274783_c0_seq9_m.78326	-0.507563	-0.506413	0.00032641	0.0107218	0.00560161	0	62	57	119
comp2275616_c0_seq2_m.80253	-0.52702	-0.524375	0.000340584	0.00964474	0.00566221	0	63	58	121
comp2265326_c0_seq3_m.60204	-0.865411	-0.850633	0.000354785	0.00315789	0.00580756	0	65	59	124
comp2275822_c0_seq10_m.80745	-0.480353	-0.478814	0.00036833	0.0117961	0.00593792	0	66	60	126
comp2245014_c0_seq2_m.33157	0.630019	0.625971	0.000389548	0.00631015	0.00615178	0	67	61	128
comp2276523_c0_seq2_m.82609	0.534633	0.536933	0.000393159	0.00946429	0.00615178	0	68	62	130
comp2269850_c0_seq1_m.68122	-0.709595	-0.715466	0.000406147	0.00477914	0.0062629	0	69	63	132
comp2262360_c0_seq1_m.55644	-0.455963	-0.454891	0.000424596	0.0131419	0.00636296	0	71	64	135
comp2208474_c0_seq1_m.14351	0.772703	0.769919	0.000449757	0.00405733	0.00636692	0	72	65	137
comp2263822_c0_seq1_m.57945	0.497525	0.498221	0.000446058	0.0114352	0.00636692	0	74	66	140
comp2277945_c0_seq2_m.86985	-1.69115	-1.7229	0.000444761	0.000721805	0.00636692	0	76	67	143
comp2278536_c1_seq38_m.89884	-0.619096	-0.619761	0.000475166	0.00712218	0.00656592	0	77	68	145
comp2275270_c0_seq2_m.79424	0.553048	0.546673	0.000493207	0.00910338	0.00657397	0	79	69	148
comp2261399_c0_seq2_m.54155	-1.18698	-1.21905	0.000529337	0.00171429	0.00675866	0	81	70	151
comp2268869_c0_seq6_m.66344	-1.56772	-1.59948	0.000533578	0.00081203	0.00675866	0	82	71	153
gnl_Pdu_trscr_assembly_1_9334_m.28552	-0.602028	-0.601187	0.000524967	0.00784398	0.00675866	0	84	72	156
comp2247988_c0_seq1_m.36173	-0.464694	-0.468525	0.000542318	0.0130517	0.00678854	0	85	73	158
comp2271649_c0_seq1_m.71599	-0.502121	-0.505669	0.000555684	0.0117058	0.00687497	0	86	74	160
comp1198575_c0_seq1_m.1066	0.455323	0.453048	0.000585403	0.0139464	0.00692077	0	87	75	162
comp2221095_c0_seq1_m.18558	-0.587147	-0.590877	0.00057746	0.00802444	0.00692077	0	88	76	164
comp2269060_c1_seq1_m.66719	-0.527473	-0.527889	0.000602767	0.010812	0.00693458	0	93	77	170
comp2256041_c0_seq1_m.46046	0.621986	0.615083	0.000634937	0.00748308	0.00715759	0	94	78	172
gnl_Pdu_trscr_assembly_1_200732_m.91055	0.766952	0.763859	0.00063907	0.00459868	0.00715759	0	95	79	174
comp1965369_c0_seq1_contamination_m.3664	0.444473	0.448575	0.000655778	0.0146626	0.00726821	0	96	80	176
comp2261876_c0_seq1_m.54865	-0.796522	-0.809229	0.000706132	0.00423778	0.00754524	0	98	81	179
comp2271526_c0_seq3_m.71285	0.586701	0.588386	0.000709139	0.00838252	0.00754524	0	100	82	182
comp2276805_c0_seq8_m.83380	-0.647135	-0.655656	0.00073162	0.00694173	0.00770737	0	101	83	184
comp2268892_c0_seq1_m.66381	-0.632698	-0.643066	0.000796565	0.00775376	0.00818664	0	103	84	187
comp2274295_c0_seq2_m.77311	-1.11538	-1.08236	0.000800198	0.00207519	0.00818664	0	104	85	189
comp2274541_c0_seq1_m.77862	-0.821754	-0.831844	0.000840419	0.00414756	0.0084359	0	106	86	192
comp1781461_c0_seq1_m.2253	-0.512355	-0.508379	0.000893648	0.0120639	0.00855236	0	110	87	197
comp2250550_c1_seq1_m.39064	-0.593103	-0.583161	0.000924597	0.00883271	0.00855236	0	111	88	199
comp2254167_c0_seq1_m.43587	0.491593	0.494368	0.000894237	0.0129615	0.00855236	0	112	89	201
comp2263291_c0_seq2_m.57114	0.593487	0.597433	0.000911157	0.00865508	0.00855236	0	114	90	204
comp2274909_c0_seq7_m.78613	-1.71399	-1.71605	0.000970757	0.000902256	0.00872591	0	118	91	209
isotig10568_m.92324	-0.988296	-0.989653	0.000975925	0.00297744	0.00872591	0	119	92	211
comp2264022_c0_seq13_m.58310	-0.356946	-0.35706	0.000196725	0.0197331	0.00418631	0.00529101	50	162	212
comp2262465_c0_seq5_m.55795	-1.13711	-1.16893	0.00102453	0.00216541	0.00886766	0	122	93	215
comp2273141_c0_seq2_m.74737	-0.585712	-0.582437	0.00103667	0.00937406	0.00886766	0	124	94	218
comp2277933_c1_seq7_m.86947	-0.587958	-0.577702	0.0010477	0.00919361	0.00886766	0	125	95	220
comp2278054_c0_seq40_m.87392	-0.690085	-0.681448	0.0010616	0.00640038	0.00886766	0	126	96	222
gnl_Pdu_trscr_assembly_1_15590_m.29311	-1.68324	-1.66391	0.00102885	0.00108271	0.00886766	0	127	97	224
comp2263873_c0_seq9_m.58029	-1.63723	-1.65074	0.00113076	0.00126316	0.00908089	0	129	98	227
comp2278422_c0_seq1_m.89011	0.380915	0.380973	0.000182955	0.0173872	0.0041543	0.00588235	48	181	229
comp2275312_c0_seq8_m.79518	-0.57975	-0.584113	0.00111617	0.00982519	0.00908089	0	131	99	230
comp2252506_c0_seq1_m.41372	-0.378394	-0.376555	0.000452119	0.0201833	0.00636692	0.00520833	73	159	232
comp2275241_c0_seq5_m.79383	-0.37765	-0.379605	0.00045478	0.0202735	0.00636692	0.00518135	75	158	233
comp2274909_c0_seq7_m.78615	-1.6494	-1.68397	0.00122674	0.00135338	0.00972146	0	135	100	235
comp2265589_c0_seq2_m.60673	0.388047	0.388452	0.000175739	0.0162914	0.0041543	0.00625	46	191	237
comp2275893_c0_seq1_m.80933	0.850805	0.861935	0.00128703	0.00441823	0.00985182	0	139	101	240
comp2272691_c0_seq4_m.73750	-1.3156	-1.28545	0.00136043	0.00198496	0.010266	0	141	102	243
comp2277815_c0_seq5_m.86532	0.784877	0.806745	0.00139196	0.00514004	0.0104299	0	142	103	245
comp2276389_c1_seq15_m.82250	0.396467	0.395986	0.000222431	0.0161128	0.00438271	0.00628931	54	192	246
comp2256220_c0_seq1_m.46316	-0.524913	-0.517165	0.00145283	0.0126006	0.0105878	0	145	104	249
comp2274581_c1_seq21_m.92631	-0.340059	-0.340179	0.000167498	0.0209248	0.00414461	0.0101523	43	211	254
comp2274106_c1_seq2_m.76871	-1.09139	-1.08564	0.00180004	0.00288722	0.0123564	0	154	105	259
comp2277005_c0_seq3_m.83943	0.477046	0.474467	0.00179855	0.0154746	0.0123564	0	155	106	261
comp2261971_c0_seq1_m.55022	-0.41632	-0.414725	0.000424486	0.0160226	0.00636296	0.00632911	70	193	263
comp2232290_c0_seq2_m.23637	-1.2224	-1.17039	0.00191292	0.00234586	0.012882	0	158	107	265
comp2277088_c0_seq32_m.84183	-0.412777	-0.409989	0.000519892	0.017297	0.00675866	0.00591716	83	182	265
comp2238188_c0_seq1_m.27576	0.725983	0.70387	0.00203106	0.00676128	0.0132826	0	161	108	269
comp2239022_c0_seq1_m.28102	0.740293	0.760657	0.0020947	0.00658083	0.0135456	0	164	109	273
comp2276741_c0_seq2_m.83166	0.411229	0.409712	0.000822488	0.0188205	0.00833454	0.00549451	105	169	274
comp2275391_c0_seq1_m.79711	0.417065	0.414679	0.000580058	0.0170263	0.00692077	0.0060241	90	185	275
comp2257070_c0_seq2_m.47512	-1.19475	-1.18231	0.00224217	0.00270677	0.0143715	0	166	110	276
comp2267341_c0_seq1_m.63653	0.513294	0.52092	0.00235878	0.0140367	0.014784	0	169	111	280
comp2279340_c0_seq1_m.91103	-0.722908	-0.7434	0.00235953	0.00739286	0.014784	0	171	112	283
comp2278161_c0_seq3_m.87805	-0.366762	-0.367026	0.000484661	0.0217284	0.00657397	0.00985222	80	205	285
comp2204754_c0_seq1_m.13720	-0.582245	-0.568138	0.00243527	0.0113449	0.0149275	0	173	113	286
comp2277132_c1_seq1_m.84335	0.325936	0.325756	0.000339698	0.0243769	0.00566221	0.0182648	64	222	286
comp2274537_c0_seq28_m.77857	0.402865	0.404611	0.00111667	0.0204615	0.00908089	0.00515464	130	157	287
gnl_Pdu_trscr_assembly_1_14069_m.67140	0.417371	0.415565	0.0009324	0.0185517	0.00855236	0.00555556	116	171	287
comp2277933_c1_seq7_m.86946	-0.984419	-0.93816	0.00257394	0.00396711	0.0151782	0	181	114	295
comp1785956_c0_seq1_m.2259	-0.427851	-0.42473	0.00104926	0.018016	0.00886766	0.00568182	121	175	296
comp2278480_c0_seq4_m.89330	-0.605418	-0.604759	0.00256895	0.0109023	0.0151782	0	182	115	297
comp2138816_c0_seq1_m.6842	-0.52899	-0.532052	0.00262444	0.0134972	0.0152194	0	183	116	299
comp2265897_c0_seq5_m.61166	0.428741	0.433578	0.0010645	0.0178355	0.00886766	0.00574713	123	177	300
comp2278405_c0_seq22_m.88893	-0.919659	-0.881763	0.00263193	0.00468891	0.0152194	0	184	117	301
comp2262731_c0_seq1_m.56213	-0.688441	-0.670193	0.00269168	0.00820207	0.0153976	0	186	118	304
comp2275905_c0_seq4_m.80965	0.687526	0.704989	0.00276817	0.00829229	0.0156666	0	188	119	307
comp2203251_c0_seq1_m.13504	-0.345364	-0.346017	0.000606124	0.0238233	0.00693458	0.0139535	91	216	307
comp2272519_c1_seq3_m.73361	-0.386283	-0.385252	0.000774052	0.0211053	0.00807442	0.0100503	102	209	311
comp2266841_c0_seq1_m.62766	-0.386035	-0.387129	0.000699838	0.0208346	0.00754524	0.0102041	99	212	311
comp2254641_c1_seq1_m.44200	-0.315877	-0.315127	0.000494283	0.0264906	0.00657397	0.0214592	78	233	311
comp1194290_c0_seq1_m.781	0.894797	0.861366	0.00296358	0.00486936	0.0164232	0	192	120	312
comp2266171_c0_seq1_m.61557	0.430725	0.436119	0.00143233	0.0187303	0.0105833	0.00552486	144	170	314
comp2261716_c0_seq2_m.54597	-0.440931	-0.443785	0.00124949	0.0174774	0.00975284	0.00584795	136	180	316
comp2253516_c0_seq4_m.42708	-1.31474	-1.21583	0.00318152	0.00261654	0.0171834	0	197	121	318
comp2270797_c0_seq10_m.69872	-0.371144	-0.368225	0.000997904	0.0228017	0.00884809	0.00952381	120	198	318
comp2254470_c0_seq1_m.44006	-0.314654	-0.313801	0.000601497	0.0275799	0.00693458	0.0209205	92	227	319
comp2271225_c0_seq5_m.70641	-0.690391	-0.690438	0.00326029	0.00856485	0.0174291	0	199	122	321
comp2276750_c0_seq1_m.83194	0.354209	0.355026	0.000867226	0.0239135	0.0084654	0.0138889	108	215	323
comp2271539_c0_seq2_m.71326	0.391141	0.390019	0.000941104	0.0214605	0.00855842	0.00995025	117	207	324
comp2272087_c2_seq11_m.72459	-0.442833	-0.445468	0.00165383	0.0181062	0.0116535	0.00564972	151	174	325
comp2267209_c0_seq1_m.63399	-0.516427	-0.505329	0.00350459	0.0149314	0.0182099	0	205	123	328
comp2247821_c0_seq5_m.35979	-0.444574	-0.443124	0.002376	0.0195461	0.014784	0.00531915	167	163	330
gnl_Pdu_trscr_assembly_1_12794_m.61443	-0.912089	-0.904373	0.00373083	0.00523026	0.0191392	0	208	124	332
comp2257674_c0_seq1_m.48339	-0.878456	-0.907197	0.00379367	0.00568139	0.0192342	0	209	125	334
comp1194362_c0_seq2_m.804	0.331416	0.331047	0.000665087	0.0259427	0.00729539	0.0219298	97	238	335
comp2278480_c1_seq1_m.89333	-0.57308	-0.558693	0.00379621	0.0128712	0.0192342	0	210	126	336
comp2242407_c0_seq1_m.30845	-1.07775	-1.0158	0.00384834	0.00387688	0.0193143	0	211	127	338
comp2262281_c0_seq3_m.55504	-0.891666	-0.853439	0.00384355	0.00541071	0.0193143	0	212	128	340
comp2258554_c0_seq1_m.49568	-0.456182	-0.453443	0.00233436	0.0182867	0.014784	0.00558659	168	172	340
comp2274819_c0_seq2_m.78403	0.433364	0.435058	0.00272885	0.0205517	0.0155267	0.00512821	187	156	343
comp2272437_c1_seq1_m.73204	0.921941	0.944255	0.00405215	0.00532049	0.0200534	0	215	129	344
comp2224014_c0_seq1_m.19704	0.466955	0.470965	0.00159745	0.0159323	0.0113313	0.00636943	150	194	344
comp2248808_c0_seq2_m.37043	-0.656977	-0.660355	0.00414258	0.0103637	0.0203471	0	216	130	346
comp2187328_c0_seq1_m.10936	-0.471043	-0.470407	0.00166834	0.0158421	0.0116783	0.00641026	152	195	347
gnl_Pdu_trscr_assembly_1_998_m.15062	0.353143	0.350472	0.00106679	0.0248412	0.00886766	0.018018	128	219	347
comp2276440_c0_seq2_m.82383	-0.4659	-0.461498	0.00237102	0.0175677	0.014784	0.00581395	170	179	349
comp2278010_c1_seq9_m.87231	0.362586	0.360954	0.00113511	0.0237331	0.00908089	0.0140187	133	217	350
gnl_Pdu_trscr_assembly_1_3048_m.12984	-0.398826	-0.396776	0.00150694	0.021906	0.0108443	0.00980392	148	204	352
comp2264743_c0_seq3_m.59295	-0.279384	-0.279166	0.000583252	0.0320686	0.00692077	0.030888	89	263	352
comp2141997_c0_seq1_m.7386	-0.915554	-0.929481	0.00442647	0.00550094	0.0212152	0	222	131	353
comp2269532_c0_seq13_m.67583	-0.452556	-0.444915	0.00278729	0.0192735	0.0156914	0.00537634	189	165	354
comp2225664_c0_seq1_m.20382	-0.456565	-0.452644	0.00310261	0.0194558	0.0169291	0.00534759	193	164	357
comp2273647_c0_seq2_m.75785	-0.703136	-0.676806	0.00467152	0.00928383	0.0215047	0	229	132	361
comp2276648_c1_seq1_m.82962	-0.313745	-0.312375	0.000930371	0.0293891	0.00855236	0.0241935	115	246	361
comp2266714_c1_seq1_m.62532	0.412642	0.409439	0.0018119	0.0211955	0.0123581	0.01	156	208	364
comp2263277_c0_seq1_m.57091	-0.279322	-0.278901	0.000902245	0.0339887	0.00855236	0.0298507	113	254	367
comp2271257_c1_seq1_m.70699	-0.576038	-0.576239	0.00494519	0.0132321	0.0222012	0	237	133	370
comp2274137_c1_seq25_m.76929	0.994185	0.966663	0.00530031	0.00495959	0.0231128	0	242	134	376
comp2275701_c1_seq1_m.80440	-0.533946	-0.539088	0.00523034	0.0155648	0.0231128	0	243	135	378
comp2268336_c0_seq2_m.65472	0.254932	0.254987	0.000866932	0.0377105	0.0084654	0.034965	107	273	380
gnl_Pdu_trscr_assembly_1_200732_m.91056	0.840115	0.809392	0.00553844	0.00721241	0.0237617	0	248	136	384
comp2273865_c0_seq2_m.76255	0.475006	0.474785	0.00414973	0.0189107	0.0203471	0.00546448	217	168	385
comp2249227_c0_seq1_m.37479	0.32352	0.325112	0.00126731	0.0290357	0.00977113	0.0243902	138	248	386
comp2272495_c0_seq1_m.73308	0.344412	0.342043	0.00202473	0.0282049	0.0132826	0.0207469	163	225	388
gnl_Pdu_trscr_assembly_1_20144_m.60515	0.261934	0.261912	0.000866249	0.0366316	0.0084654	0.0361011	109	282	391
comp2276498_c2_seq1_m.82546	-0.495319	-0.489134	0.0036683	0.0164718	0.0189469	0.00617284	206	189	395
comp2273599_c0_seq7_m.75677	-0.621437	-0.600908	0.00662673	0.012781	0.0270147	0	261	137	398
comp2276461_c0_seq7_m.82444	-0.300588	-0.299137	0.00113261	0.0317011	0.00908089	0.03125	132	266	398
comp2257070_c0_seq2_m.47513	-0.707992	-0.67509	0.00680663	0.0105414	0.0273798	0	263	138	401
comp2254206_c0_seq1_m.43646	0.363751	0.366963	0.00203484	0.0256729	0.0132826	0.0221239	162	240	402
comp2278238_c1_seq2_m.88191	0.369404	0.36719	0.00195868	0.0250282	0.0130252	0.0224215	160	243	403
comp2273900_c0_seq1_m.76336	0.353474	0.350899	0.00259304	0.0279352	0.0151782	0.0208333	179	226	405
comp2236614_c0_seq1_m.26450	-0.986556	-0.931833	0.00759228	0.0061297	0.0299192	0	270	139	409
comp2274413_c0_seq1_m.77564	-0.501111	-0.513593	0.00450694	0.0171165	0.0213934	0.00598802	226	184	410
comp2271319_c0_seq2_m.70822	0.38486	0.389141	0.00291768	0.0246607	0.016339	0.0181818	190	221	411
comp2266503_c0_seq6_m.62129	-0.305758	-0.304227	0.00150841	0.0319784	0.0108443	0.0310078	147	264	411
comp2275107_c0_seq4_m.79080	-0.26793	-0.267974	0.00125577	0.0374427	0.00975284	0.0352113	137	275	412
comp2277729_c0_seq10_m.86207	-0.715576	-0.685484	0.008227	0.0109925	0.031831	0	275	140	415
comp2263896_c0_seq3_m.58065	0.375112	0.380142	0.00244115	0.0252152	0.0149275	0.0223214	174	242	416
gi_613484551	-0.576568	-0.585266	0.00837113	0.0150216	0.0322713	0	276	141	417
comp2276634_c1_seq3_m.82935	0.37181	0.374632	0.00259626	0.0255827	0.0151782	0.0222222	180	241	421
comp2250281_c0_seq1_m.38657	0.31085	0.312357	0.00210058	0.0324286	0.0135456	0.0306513	165	261	426
comp2261428_c0_seq1_m.54200	-0.252795	-0.252282	0.00123346	0.0403459	0.00972146	0.0442177	134	292	426
comp2277475_c0_seq2_m.85365	-0.324102	-0.322404	0.00250206	0.0309756	0.0151261	0.027668	176	251	427
comp2233700_c1_seq1_m.24550	-0.762965	-0.78113	0.00887544	0.0100056	0.0329041	0	286	142	428
comp2275542_c0_seq9_m.80087	-0.367606	-0.363236	0.00320899	0.0265808	0.0172442	0.0213675	198	232	430
comp2139115_c0_seq1_m.6894	-0.801137	-0.748895	0.00905459	0.00901316	0.0334517	0	288	143	431
comp2263768_c0_seq2_m.57843	-0.264089	-0.264144	0.0014167	0.0387387	0.0105411	0.0380623	143	290	433
comp2276804_c0_seq1_m.83376	0.436975	0.426494	0.0047369	0.0221786	0.0216312	0.00970874	233	202	435
comp2276426_c0_seq2_m.82339	-0.332352	-0.328628	0.00294635	0.0303186	0.0164132	0.024	191	244	435
comp2269297_c0_seq2_m.67181	0.515937	0.529869	0.00652296	0.0177453	0.0266939	0.00578035	260	178	438
comp2267968_c0_seq2_m.64758	-0.52034	-0.522617	0.00583758	0.0168459	0.0245618	0.00609756	251	187	438
comp2263394_c0_seq1_m.57263	-0.512244	-0.516532	0.00792105	0.019093	0.0309853	0.00543478	272	167	439
comp2276973_c0_seq1_m.83872	0.267356	0.268478	0.00169676	0.0389192	0.0117997	0.0378007	153	288	441
comp2247098_c0_seq1_m.35275	-0.984081	-1.06777	0.0101573	0.00667105	0.0359048	0	300	144	444
comp2277142_c0_seq6_m.84365	-0.52519	-0.525085	0.00589712	0.0163816	0.0247029	0.00621118	254	190	444
comp2278306_c0_seq2_m.88465	-0.290783	-0.291554	0.00192741	0.0350733	0.0128979	0.0367647	159	287	446
comp2204672_c0_seq1_m.13711	-0.273103	-0.271782	0.00184736	0.0384511	0.0125197	0.0381944	157	291	448
comp2256252_c0_seq1_m.46348	-1.1879	-1.24251	0.0104007	0.00504981	0.0362832	0	304	145	449
comp2272233_c0_seq1_m.72760	-0.253363	-0.25401	0.00151882	0.0424746	0.0108458	0.0459016	149	301	450
comp2265885_c0_seq3_m.61143	-0.606379	-0.598221	0.0104006	0.0143947	0.0362832	0	305	146	451
comp2261368_c1_seq1_m.54120	-0.254956	-0.255571	0.00134052	0.0406983	0.0101879	0.0474576	140	311	451
comp2277995_c0_seq1_m.87177	-0.532068	-0.517372	0.00716642	0.0169361	0.028346	0.00606061	269	186	455
comp2206512_c0_seq1_m.14012	0.318911	0.322503	0.00316676	0.0327049	0.0171834	0.0305344	196	260	456
comp2263667_c0_seq1_m.57601	0.405598	0.412428	0.00529538	0.0247509	0.0231128	0.0180995	240	220	460
comp2274806_c0_seq1_m.78376	-0.694906	-0.656903	0.0111787	0.0125103	0.0377593	0	315	147	462
comp2263661_c0_seq1_m.57595	-0.23614	-0.23601	0.00144753	0.0468233	0.0105878	0.0529595	146	319	465
comp2277724_c0_seq10_m.86198	-0.379829	-0.377054	0.00483151	0.0267679	0.0218754	0.0212766	235	231	466
comp2248254_c1_seq2_m.36433	0.325336	0.324821	0.00350849	0.0323383	0.0182099	0.0307692	204	262	466
comp2277501_c0_seq23_m.85461	-0.3723	-0.372227	0.00526619	0.0284821	0.0231128	0.0205761	244	223	467
comp2245053_c0_seq1_m.33185	-0.47326	-0.467914	0.00681921	0.021015	0.0273798	0.010101	262	210	472
comp2273778_c1_seq23_m.76059	-0.644875	-0.664197	0.0120169	0.0138562	0.0391008	0	326	148	474
comp2138952_c0_seq1_m.6867	-0.426013	-0.417122	0.006988	0.0240912	0.0278473	0.0138249	267	214	481
comp2271350_c0_seq18_m.70897	0.522509	0.539299	0.0115645	0.0200028	0.0384753	0.00526316	321	161	482
gnl_Pdu_trscr_assembly_1_2615_m.68529	0.295861	0.296254	0.00334472	0.0367218	0.0176177	0.0359712	202	281	483
comp2267169_c0_seq1_m.63315	0.430239	0.437233	0.00769772	0.0241814	0.0302228	0.0137615	271	213	484
gnl_Pdu_trscr_assembly_1_7327_m.81715	0.326955	0.322068	0.00468662	0.0331588	0.0215047	0.030303	232	258	490
gnl_Pdu_trscr_assembly_1_326_m.78835	-0.315675	-0.311387	0.00432508	0.0345338	0.020823	0.0332103	221	269	490
comp2260394_c0_seq1_m.52394	0.360755	0.359976	0.00547287	0.0295714	0.0235754	0.0240964	246	245	491
comp2257585_c0_seq1_m.48216	-0.395784	-0.401833	0.00614483	0.0261231	0.0254401	0.0217391	256	236	492
gnl_Pdu_trscr_assembly_1_2589_m.58494	0.256014	0.255628	0.00248604	0.0451607	0.0151151	0.0509554	175	317	492
comp2279445_c0_seq1_m.91120	-0.534239	-0.537872	0.0132959	0.020093	0.0423559	0.0052356	334	160	494
comp2245721_c0_seq1_m.33844	0.397146	0.400502	0.00644903	0.0262133	0.0264933	0.021645	259	235	494
comp2271350_c0_seq18_m.70898	0.255203	0.256558	0.002568	0.0453383	0.0151782	0.0507937	178	316	494
comp2252186_c0_seq3_m.40915	0.642646	0.645582	0.0149632	0.0148412	0.0458813	0	346	149	495
comp2263909_c0_seq2_m.58087	-0.269311	-0.267478	0.00337112	0.0434727	0.0176693	0.0450161	203	295	498
comp2265255_c2_seq1_m.60100	-0.484853	-0.491091	0.0100835	0.0219962	0.0358861	0.0097561	299	203	502
comp2261379_c0_seq1_m.54133	-0.656574	-0.653482	0.0158673	0.014485	0.0477702	0	353	150	503
comp2276577_c0_seq8_m.92288	-0.561915	-0.590457	0.0120008	0.0179258	0.0391008	0.00571429	327	176	503
comp2273595_c0_seq1_m.75667	-0.30976	-0.309693	0.00425745	0.0351635	0.0207795	0.03663	218	286	504
gnl_Pdu_trscr_assembly_1_16061_m.43221	-0.274514	-0.274436	0.00327614	0.0414342	0.0174291	0.0465116	200	305	505
comp2266701_c0_seq3_m.62512	-1.24688	-1.08722	0.0160438	0.00603947	0.0480863	0	355	151	506
comp2278012_c0_seq11_m.87235	-0.70641	-0.667623	0.0170528	0.0135874	0.0504006	0	360	152	512
comp2278378_c0_seq4_m.88778	-0.576177	-0.542067	0.0142966	0.0181964	0.0447401	0.00561798	340	173	513
comp2278605_c1_seq8_m.90480	-0.574251	-0.555452	0.0161242	0.0191833	0.0481914	0.00540541	356	166	522
comp2246502_c0_seq1_m.34680	0.277187	0.274989	0.004689	0.0432951	0.0215047	0.0451613	228	296	524
comp2276719_c0_seq5_m.83124	0.473216	0.468048	0.0121644	0.0230874	0.03934	0.00943396	329	196	525
comp2270458_c0_seq1_m.69251	-0.256473	-0.257664	0.00333551	0.0474906	0.0176177	0.0555556	201	325	526
comp2232641_c0_seq7_m.23875	0.326151	0.330133	0.00617282	0.0344436	0.0254569	0.0333333	258	270	528
comp2262843_c0_seq2_m.56395	-0.237825	-0.2381	0.00267352	0.0523769	0.0153764	0.0641399	185	343	528
comp2276940_c0_seq2_m.83802	-0.307196	-0.306015	0.00584036	0.037265	0.0245618	0.0353357	253	276	529
comp2271124_c0_seq1_m.70454	0.219833	0.219526	0.00240637	0.057391	0.0148859	0.0726257	172	357	529
comp2271595_c0_seq2_m.71452	-0.29471	-0.296326	0.0052436	0.0388289	0.0231128	0.037931	241	289	530
comp2259230_c0_seq1_m.50704	-0.22124	-0.221666	0.00258388	0.0576852	0.0151782	0.0724234	177	356	533
comp2222959_c0_seq1_m.19328	0.462176	0.470618	0.011266	0.0235461	0.0378139	0.0140845	317	218	535
comp2277769_c0_seq5_m.86350	0.274227	0.275904	0.00457163	0.0440263	0.0214283	0.0480769	227	313	540
comp2271567_c0_seq1_m.71391	-0.496835	-0.492736	0.0146247	0.0226259	0.0454968	0.00956938	343	199	542
comp2248226_c3_seq1_m.36365	0.239874	0.240825	0.00309799	0.0530132	0.0169291	0.0666667	194	349	543
comp2268978_c0_seq1_m.66540	-0.694564	-0.752464	0.0215393	0.0151118	0.0583151	0	393	153	546
comp2272876_c0_seq2_m.74167	0.369126	0.37526	0.0098424	0.0307951	0.0353794	0.0278884	296	253	549
comp2269230_c0_seq2_m.67055	-0.286999	-0.283395	0.00517446	0.0407885	0.0230361	0.0472973	239	310	549
comp2261183_c0_seq1_m.53867	-0.362111	-0.366343	0.00916598	0.0315226	0.033746	0.0313725	289	267	556
comp2269171_c0_seq3_m.66933	0.401183	0.400254	0.0106383	0.0286776	0.0368704	0.0245902	307	250	557
comp2266801_c0_seq2_m.62707	0.269979	0.272362	0.005151	0.0458994	0.023028	0.0534591	238	322	560
comp2277911_c0_seq5_m.86869	0.324632	0.323385	0.00848883	0.0358797	0.0326069	0.0363636	277	284	561
comp2273813_c0_seq2_m.76128	-0.286423	-0.28552	0.0067545	0.0432049	0.0273798	0.0453074	264	297	561
comp2278589_c0_seq3_m.90346	-0.248243	-0.246341	0.00431017	0.0525526	0.020823	0.0639535	220	342	562
comp2251806_c0_seq1_m.40480	0.212727	0.212224	0.00308053	0.0627585	0.0169291	0.0896739	195	367	562
comp2277312_c0_seq10_m.84862	0.261463	0.261698	0.00488161	0.0487641	0.0220086	0.0574018	236	329	565
comp2274787_c0_seq1_m.78332	0.236298	0.236564	0.00401595	0.0560949	0.0199672	0.0708215	214	354	568
comp2278222_c0_seq3_m.88116	0.230281	0.229099	0.00392099	0.0580592	0.0195866	0.0722222	213	355	568
comp2244716_c0_seq1_m.32883	-0.243684	-0.244666	0.00448935	0.0542162	0.0213934	0.0662824	223	347	570
comp2272491_c1_seq4_m.73302	0.240136	0.241781	0.00428484	0.055328	0.0208177	0.0683761	219	351	570
comp2276783_c0_seq3_m.92635	-0.293736	-0.292072	0.00681318	0.040969	0.0273798	0.0469799	265	308	573
comp2263115_c0_seq2_m.56831	-0.303372	-0.307683	0.00868591	0.040078	0.0328256	0.0445205	280	294	574
comp2272169_c2_seq2_m.72626	-0.23977	-0.238419	0.00453412	0.0555235	0.0213934	0.0681818	224	350	574
comp2275974_c0_seq18_m.81146	-0.754947	-0.705422	0.0265671	0.0143045	0.066826	0	423	154	577
comp2271168_c0_seq1_m.70546	-0.218607	-0.2187	0.00374149	0.0623976	0.0191392	0.0906593	207	371	578
comp2275720_c0_seq4_m.80482	0.235854	0.23701	0.00461299	0.057016	0.0215047	0.0730337	230	359	589
comp2273257_c0_seq9_m.74986	0.53301	0.566489	0.0213879	0.0225357	0.0580529	0.00961538	390	200	590
comp2271753_c0_seq2_m.71801	-0.450781	-0.465317	0.016569	0.0260329	0.0492441	0.0218341	358	237	595
comp2277413_c0_seq4_m.85165	-0.29798	-0.294009	0.00988009	0.0428336	0.0353953	0.0454545	297	298	595
comp2272724_c0_seq1_m.73818	-0.222806	-0.221615	0.00454409	0.0624878	0.0213934	0.090411	225	370	595
gnl_Pdu_trscr_assembly_1_1986_m.5697	-0.223053	-0.222046	0.00467653	0.0626682	0.0215047	0.0899183	231	368	599
comp2272882_c0_seq14_m.74184	0.679551	0.628763	0.0249787	0.0167556	0.064508	0.00613497	412	188	600
comp2277311_c0_seq3_m.84858	-0.679497	-0.64692	0.0261143	0.0172068	0.0664728	0.00595238	418	183	601
comp2264838_c0_seq3_m.59436	0.329962	0.322106	0.0118682	0.0370846	0.0390954	0.0355872	323	278	601
comp1196959_c0_seq2_m.1014	-0.370222	-0.365781	0.0147559	0.0330686	0.0455079	0.0304183	344	259	603
comp2261980_c0_seq3_m.55041	-0.377592	-0.38717	0.0138094	0.0318882	0.0433429	0.0311284	339	265	604
comp2278554_c0_seq4_m.90013	-0.281872	-0.277205	0.00876171	0.0461786	0.0328256	0.0532915	284	321	605
comp2278470_c0_seq2_m.89275	-0.552932	-0.583304	0.0233652	0.0222688	0.061233	0.00966184	406	201	607
gnl_Pdu_trscr_assembly_1_3867_m.65412	-0.98158	-1.0804	0.0347773	0.0122444	0.0815044	0	454	155	609
comp2274888_c0_seq2_m.78557	-0.569802	-0.542937	0.0225422	0.0216382	0.0596635	0.00990099	404	206	610
comp2275933_c0_seq1_m.81045	-0.465536	-0.483496	0.0183876	0.0257632	0.0521426	0.0220264	376	239	615
comp2269987_c0_seq2_m.68354	-0.304262	-0.31012	0.01099	0.0422049	0.0376945	0.0462046	313	303	616
comp2269848_c0_seq4_m.68115	-0.398012	-0.382638	0.0179155	0.0308853	0.0517711	0.0277778	369	252	621
comp1910314_c0_seq1_m.2848	0.275798	0.271629	0.00955194	0.0488543	0.0346869	0.0572289	293	328	621
comp2266882_c0_seq1_m.62832	-0.254215	-0.252792	0.00814882	0.0552378	0.0316436	0.0685714	274	352	626
comp2275759_c0_seq17_m.80560	0.208771	0.208937	0.00545487	0.0704088	0.0235754	0.101266	247	385	632
comp2277951_c0_seq2_m.87004	-0.460799	-0.47368	0.023682	0.0273073	0.0619107	0.021097	407	229	636
comp1199432_c0_seq1_m.1095	0.250208	0.247092	0.00865613	0.0569258	0.0328256	0.0732394	278	360	638
comp2273845_c0_seq2_m.76206	0.34669	0.349818	0.0170067	0.0369041	0.0504006	0.0358423	359	280	639
comp2270148_c0_seq3_m.68661	0.283204	0.288633	0.0112303	0.0482077	0.0378134	0.0552147	316	323	639
comp2268336_c1_seq1_m.65474	0.311568	0.313213	0.0146667	0.0426551	0.0454968	0.0456026	342	299	641
comp2250533_c0_seq1_m.39039	-0.196738	-0.196546	0.0048117	0.0766476	0.0218754	0.109756	234	410	644
comp2266869_c0_seq1_m.62813	-0.217754	-0.218552	0.00579297	0.0666447	0.0245618	0.102362	250	395	645
comp2277388_c0_seq8_m.85092	-0.341571	-0.346203	0.0182423	0.0381776	0.0518978	0.0348432	374	272	646
comp2270228_c0_seq1_m.68797	-0.401662	-0.400099	0.019385	0.0312481	0.0541354	0.0314961	381	268	649
comp2258554_c1_seq2_m.49570	-0.483087	-0.461459	0.0258704	0.0263036	0.0661685	0.0215517	416	234	650
comp2278454_c0_seq1_m.89160	-0.371914	-0.361215	0.0191042	0.0342566	0.0537323	0.0334572	379	271	650
comp2268942_c0_seq5_m.66483	-0.446023	-0.442827	0.0224933	0.02886	0.0596635	0.0244898	402	249	651
comp2274242_c0_seq2_m.77187	0.227343	0.225574	0.00800544	0.0649352	0.0312007	0.0986667	273	378	651
comp2271244_c0_seq1_m.70676	-0.283804	-0.281394	0.0116396	0.0484934	0.0384753	0.0579268	320	332	652
comp2276668_c0_seq1_m.83017	0.243914	0.246882	0.00938625	0.0598731	0.0342019	0.0828729	292	362	654
gnl_Pdu_trscr_assembly_1_11607_m.26425	-0.234285	-0.236528	0.00934475	0.0635113	0.0341678	0.0889488	291	364	655
comp2258609_c0_seq1_m.49647	-0.23658	-0.237162	0.00885533	0.062578	0.0329041	0.0901639	287	369	656
comp2269374_c0_seq3_m.67298	-0.216874	-0.215712	0.00581978	0.067203	0.0245618	0.104167	252	405	657
comp2272293_c0_seq1_m.72898	0.21653	0.217206	0.00598661	0.0676438	0.0249794	0.103627	255	403	658
comp2264302_c0_seq2_m.58699	-0.226732	-0.227339	0.00869741	0.0663515	0.0328256	0.1	281	379	660
comp2271636_c1_seq22_m.71557	0.27622	0.278924	0.0115773	0.0508148	0.0384753	0.0625	322	339	661
comp2275153_c0_seq1_m.79199	-0.197076	-0.196505	0.00532936	0.0782274	0.0231447	0.111111	245	418	663
comp2259349_c0_seq2_m.50877	-0.32173	-0.318881	0.0163417	0.0408788	0.0487045	0.047138	357	309	666
comp2268115_c0_seq2_m.65034	0.278148	0.272549	0.0120068	0.0504568	0.0391008	0.0628743	325	341	666
comp2268225_c0_seq5_m.65245	-0.364284	-0.355912	0.0195278	0.0352538	0.0543915	0.0364964	382	285	667
comp2263921_c0_seq2_m.58101	-0.394747	-0.400052	0.0253994	0.0336109	0.0652776	0.0300752	414	256	670
comp2277977_c1_seq3_m.87126	-0.219005	-0.220562	0.00873543	0.0702218	0.0328256	0.101523	283	387	670
comp2276302_c0_seq1_m.82036	0.189341	0.189867	0.00565111	0.0843825	0.0241477	0.111369	249	421	670
comp2262185_c0_seq1_m.55318	-0.359398	-0.366998	0.0211985	0.0365414	0.0580529	0.0362319	388	283	671
comp2271419_c1_seq1_m.71009	-0.252591	-0.256621	0.0111671	0.0582547	0.0377593	0.0747922	314	361	675
comp1953077_c0_seq1_m.3483	0.296172	0.298377	0.015505	0.0473026	0.0470009	0.0557276	351	326	677
comp2265703_c0_seq1_m.60844	0.239251	0.2375	0.0110563	0.0631447	0.0376945	0.0894309	312	366	678
comp2272182_c0_seq2_m.72649	-0.23195	-0.234226	0.0102542	0.0654868	0.0361273	0.0981432	302	376	678
comp2277352_c0_seq3_m.84974	-0.30211	-0.295044	0.0171775	0.0462688	0.0506285	0.053125	361	320	681
comp2268473_c1_seq1_m.65668	0.405616	0.407148	0.0280169	0.0334333	0.0694871	0.0301887	429	257	686
comp2274258_c1_seq4_m.77217	0.224898	0.225979	0.00870403	0.0672932	0.0328256	0.103896	282	404	686
comp2268340_c1_seq1_m.65478	-0.19906	-0.199192	0.00708016	0.0815996	0.0281093	0.111374	268	422	690
comp2254346_c0_seq1_m.43876	-0.621268	-0.614926	0.0430883	0.0229972	0.0926691	0.00947867	494	197	691
comp1977957_c0_seq1_m.3878	-0.307722	-0.311546	0.0185499	0.0454286	0.0523529	0.0506329	377	315	692
comp2280178_c0_seq1_m.91219	-0.506392	-0.473559	0.0376054	0.0274897	0.0860476	0.0210084	465	228	693
comp2265049_c0_seq3_m.59764	-0.328171	-0.336662	0.0220129	0.0425648	0.0591873	0.0457516	395	300	695
comp2246514_c1_seq1_m.34691	-0.223545	-0.224482	0.0106837	0.0700395	0.0369075	0.101781	308	389	697
comp2269698_c0_seq1_m.67864	-0.333015	-0.323704	0.0221953	0.0412472	0.0591873	0.0466667	397	306	703
comp2275508_c1_seq3_m.80009	-0.312403	-0.303953	0.0211123	0.0456165	0.0580529	0.0504732	391	314	705
comp2278376_c0_seq1_m.88768	-0.285803	-0.282341	0.017882	0.0519051	0.0517711	0.0615836	373	334	707
comp2140166_c0_seq1_m.7086	0.225939	0.226546	0.0110887	0.069218	0.0376945	0.103093	310	400	710
comp2275068_c1_seq1_m.78996	0.211993	0.213123	0.0101327	0.0771269	0.0359048	0.109489	301	409	710
comp2262300_c0_seq2_m.55547	-0.208296	-0.207925	0.00881168	0.077687	0.0328969	0.11165	285	426	711
comp2257633_c0_seq1_m.48279	0.188226	0.187504	0.0069258	0.0879793	0.0277032	0.125	266	449	715
comp2269601_c0_seq3_m.67709	-0.226784	-0.224579	0.0130655	0.0704991	0.041747	0.10101	333	383	716
comp2268172_c0_seq1_m.65149	0.338042	0.343166	0.0252302	0.0417368	0.0649997	0.0463576	413	304	717
comp2197446_c0_seq1_m.12404	-0.205629	-0.205397	0.0100845	0.0818731	0.0358861	0.111111	298	419	717
comp2278031_c0_seq2_m.87291	0.205719	0.204932	0.00927996	0.0810385	0.0340479	0.111905	290	428	718
comp2250201_c0_seq1_m.38525	-0.189251	-0.190144	0.0086094	0.0908637	0.0328256	0.123874	279	441	720
comp2268874_c0_seq62_m.66354	-0.170486	-0.170489	0.00613349	0.0979793	0.0254401	0.13449	257	463	720
comp2272782_c0_seq2_m.73955	0.376277	0.37281	0.0308227	0.0369944	0.0742104	0.0357143	442	279	721
comp2261047_c0_seq1_m.53653	-0.324694	-0.313111	0.0244981	0.0443111	0.0635755	0.0479233	410	312	722
comp2223962_c0_seq7_m.19686	0.201063	0.200186	0.0105485	0.0852923	0.0366784	0.110855	306	417	723
comp2273193_c0_seq1_m.74830	-0.348487	-0.352617	0.0283334	0.0402556	0.0699461	0.0443686	431	293	724
comp2272254_c0_seq4_m.72822	-0.377909	-0.39748	0.0336978	0.0376203	0.0794999	0.0350877	451	274	725
comp2277388_c0_seq8_m.85093	-0.312819	-0.318916	0.0239076	0.0470103	0.0623473	0.052795	408	318	726
comp2268441_c0_seq1_m.65632	0.425277	0.44821	0.0387201	0.0337932	0.0870982	0.0299625	473	255	728
comp2264066_c0_seq3_m.58370	-0.239347	-0.238343	0.0150222	0.0661541	0.0458858	0.100264	348	380	728
comp2263347_c0_seq2_m.57195	0.229305	0.2318	0.0136993	0.0699492	0.0431455	0.102041	337	391	728
comp2274036_c0_seq6_m.76723	0.229941	0.23151	0.0135006	0.0697519	0.042752	0.102302	335	394	729
comp2258014_c0_seq1_m.48797	-0.531788	-0.493243	0.0471053	0.0282951	0.0980822	0.0206612	511	224	735
comp2228369_c0_seq1_m.21627	-0.226206	-0.224799	0.0147219	0.0722603	0.0455079	0.102244	345	393	738
tuba_m.92505	0.227345	0.227433	0.0150509	0.0719859	0.0458858	0.1025	349	396	745
comp2198016_c0_seq1_m.12499	-0.21348	-0.211626	0.0122427	0.0788477	0.0394019	0.110843	330	415	745
comp2254496_c0_seq2_m.44030	-0.19864	-0.196966	0.0110563	0.0866363	0.0376945	0.116972	311	436	747
comp2270119_c0_seq15_m.68605	-0.2286	-0.227808	0.0155727	0.0717885	0.047072	0.102757	352	398	750
gnl_Pdu_trscr_assembly_1_18157_m.24773	-0.185647	-0.185028	0.00961337	0.0959342	0.0347913	0.129103	294	456	750
comp2265328_c0_seq2_m.60206	0.260264	0.258386	0.0212574	0.0618308	0.0580529	0.0881543	389	363	752
comp2278534_c0_seq1_m.89879	-0.211569	-0.209293	0.013706	0.0820536	0.0431455	0.110588	338	414	752
comp2265464_c0_seq1_m.60472	0.274677	0.269129	0.0221565	0.0571062	0.0591873	0.0728291	396	358	754
comp2263658_c0_seq3_m.57592	-0.302589	-0.293585	0.0262477	0.0510855	0.0664941	0.0623145	420	338	758
comp2270044_c0_seq2_m.68460	0.191932	0.193009	0.0115679	0.0935761	0.0384753	0.12362	319	440	759
comp2271906_c0_seq1_m.72107	-0.256445	-0.253835	0.0220948	0.063235	0.0591873	0.0891892	398	365	763
comp2277740_c0_seq2_m.86258	0.281556	0.275315	0.0248736	0.0562726	0.064393	0.0706215	411	353	764
comp2266931_c0_seq5_m.62893	-0.519871	-0.496702	0.0494119	0.0291259	0.101104	0.0242915	520	247	767
comp2280536_c0_seq1_m.91231	0.305405	0.301343	0.029411	0.0516363	0.0717736	0.0619469	436	336	772
comp2276825_c0_seq1_m.83424	-0.238331	-0.237479	0.0213649	0.0705893	0.0580529	0.100756	392	382	774
comp2236007_c0_seq2_m.26049	0.309975	0.311496	0.0302041	0.0506325	0.0733726	0.0626866	437	340	777
comp2272371_c0_seq1_m.73054	-0.174042	-0.174526	0.00982853	0.107242	0.0353794	0.150826	295	483	778
comp2211414_c0_seq1_m.14992	-0.239096	-0.238713	0.0196707	0.0695761	0.0546466	0.102564	383	397	780
comp2258193_c0_seq1_m.49089	0.180115	0.179233	0.0108476	0.103692	0.0373523	0.146497	309	471	780
comp2265923_c0_seq1_m.61202	-0.364265	-0.349517	0.0408679	0.0422951	0.0900279	0.0460526	479	302	781
comp2243632_c0_seq1_m.31907	0.24278	0.240208	0.0211946	0.0682914	0.0580529	0.103359	386	401	787
comp2269321_c1_seq1_m.67212	0.183558	0.182324	0.0116438	0.10142	0.0384753	0.141328	318	469	787
comp2276272_c0_seq2_m.81963	-0.330868	-0.318055	0.0372248	0.0480254	0.0853603	0.0553846	464	324	788
comp2278362_c0_seq1_m.88712	-0.172674	-0.172067	0.0103091	0.108578	0.0362009	0.151639	303	487	790
comp2269110_c0_seq3_m.66810	0.222697	0.219362	0.0180842	0.0780451	0.0517711	0.11138	368	423	791
comp2110333_c0_seq1_m.6080	-0.248087	-0.251616	0.02239	0.066735	0.0595575	0.102094	400	392	792
comp2263612_c1_seq1_m.57550	-0.183937	-0.184728	0.0119435	0.10151	0.0391008	0.141026	324	468	792
comp2269627_c0_seq2_m.67749	-0.218758	-0.22234	0.0191396	0.0819633	0.0537323	0.110849	378	416	794
comp2274693_c0_seq1_m.78142	-0.213654	-0.212134	0.0180306	0.0840056	0.0517711	0.111628	370	424	794
comp2241424_c0_seq3_m.29932	-0.370948	-0.377786	0.0424731	0.0410592	0.0922806	0.0468227	488	307	795
comp2259963_c0_seq1_m.51818	-0.232818	-0.229047	0.021715	0.0743872	0.0586415	0.103448	394	402	796
comp2262339_c0_seq1_m.55609	0.316091	0.313686	0.0362964	0.0512735	0.083773	0.0621302	460	337	797
comp2269906_c0_seq2_m.68214	0.330173	0.335088	0.0380991	0.0485836	0.086108	0.0577508	471	331	802
comp2245960_c0_seq1_m.34133	-0.329253	-0.323512	0.0417706	0.0496758	0.0914484	0.0570571	484	327	811
comp2276528_c1_seq4_m.82615	-0.619479	-0.635204	0.0704686	0.0272171	0.129197	0.0211864	582	230	812
comp2258619_c0_seq2_m.49656	0.217855	0.221805	0.0213637	0.0837415	0.0580529	0.111888	387	427	814
comp2275167_c0_seq1_m.79227	-0.206642	-0.205006	0.0179942	0.0890066	0.0517711	0.124153	371	443	814
comp2272807_c0_seq4_m.74003	-0.194186	-0.1925	0.0158935	0.0973195	0.0477702	0.132609	354	460	814
comp2275467_c0_seq60_m.79906	0.190653	0.191405	0.0151322	0.0995752	0.0460018	0.135484	350	464	814
comp2273385_c0_seq1_m.75218	-0.233714	-0.238207	0.0242086	0.0757143	0.0629779	0.107843	409	408	817
comp2234809_c0_seq1_m.25266	0.218128	0.221633	0.0200104	0.08289	0.0554455	0.112676	384	433	817
comp2247229_c0_seq1_m.35389	0.207775	0.210287	0.0181078	0.0877068	0.0517711	0.125285	366	452	818
comp2278268_c0_seq9_m.88316	-0.183479	-0.18217	0.0143628	0.105754	0.0448153	0.148847	341	477	818
comp2274301_c0_seq6_m.77327	-0.186569	-0.186992	0.014921	0.103234	0.0458813	0.146809	347	472	819
comp2278308_c1_seq12_m.88483	-0.20149	-0.199869	0.0180239	0.0929436	0.0517711	0.124722	372	448	820
comp2267718_c0_seq1_m.64309	-0.205871	-0.205638	0.0209622	0.0916109	0.057932	0.123318	385	438	823
gnl_Pdu_trscr_assembly_1_1512_m.69248	-0.318723	-0.317863	0.0405997	0.0522867	0.0900279	0.0643275	483	344	827
comp2278194_c0_seq1_m.87981	-0.22517	-0.22103	0.0221684	0.0802162	0.0591873	0.11244	399	432	831
comp2276442_c0_seq1_m.82386	-0.159725	-0.159233	0.0122964	0.123368	0.0394076	0.174853	332	503	835
comp2270845_c1_seq1_m.69967	-0.245983	-0.251408	0.0316608	0.0724427	0.0753625	0.10199	447	390	837
comp2276412_c0_seq1_m.82311	0.160822	0.160867	0.0120901	0.122465	0.0392191	0.176587	328	510	838
comp2267691_c0_seq1_m.64257	-0.155856	-0.15562	0.0122575	0.126356	0.0394019	0.176699	331	511	842
comp2275610_c0_seq1_m.80236	-0.256304	-0.251354	0.0388013	0.0707679	0.0870982	0.100503	474	381	855
comp2267011_c0_seq2_m.63019	-0.186457	-0.187301	0.0181491	0.106698	0.0517711	0.152083	367	489	856
comp2253149_c0_seq1_m.42245	0.23037	0.234093	0.0274433	0.0804915	0.0683417	0.112172	427	430	857
comp2347711_c0_seq1_contamination_m.91628	0.153252	0.15366	0.013469	0.131804	0.042752	0.189655	336	523	859
comp2253875_c0_seq1_m.43271	-0.244529	-0.242324	0.0349432	0.0753336	0.0817133	0.105651	455	407	862
comp2258349_c0_seq1_m.49322	-0.172619	-0.171796	0.0172307	0.117869	0.0506448	0.172345	362	500	862
comp2254376_c0_seq1_m.43911	-0.225687	-0.222916	0.0286193	0.0834633	0.0704884	0.112412	432	431	863
comp2265077_c0_seq1_m.59810	0.187671	0.187433	0.0193389	0.106789	0.0541354	0.151767	380	488	868
comp2263508_c0_seq1_m.57408	-0.27725	-0.287524	0.0431991	0.0642895	0.0926691	0.0965147	495	374	869
comp2189372_c0_seq1_m.11219	0.21087	0.206752	0.0263676	0.0918064	0.0666394	0.12528	421	451	872
comp2276498_c0_seq1_m.82544	-0.240592	-0.232747	0.0369626	0.0792086	0.0849422	0.110577	463	413	876
comp2276936_c0_seq3_m.83786	0.473726	0.530312	0.0805983	0.0371748	0.142453	0.035461	602	277	879
comp2228430_c0_seq1_m.21640	-0.166245	-0.16584	0.0181209	0.124689	0.0517711	0.177734	365	514	879
comp2260997_c1_seq7_m.53574	0.212672	0.211539	0.0307626	0.0933111	0.0742104	0.123894	440	442	882
comp2277351_c1_seq2_m.84968	-0.21788	-0.217037	0.0292774	0.0885301	0.0716119	0.124717	435	447	882
comp2269345_c0_seq1_m.67253	-0.256133	-0.24839	0.0445375	0.0733581	0.0945693	0.101235	501	384	885
comp2262317_c0_seq2_m.55577	0.329308	0.33472	0.057286	0.0546739	0.11143	0.0659026	546	345	891
comp2251594_c0_seq1_m.40214	0.277916	0.288808	0.048382	0.0657641	0.0997645	0.0978836	516	375	891
comp2269009_c0_seq1_m.66627	0.195052	0.191802	0.0260433	0.105844	0.066451	0.148536	417	476	893
comp2278273_c0_seq4_m.88339	-0.219483	-0.21604	0.0359871	0.0910395	0.0834211	0.123596	459	439	898
comp2275191_c0_seq1_m.79281	-0.181435	-0.17919	0.0228406	0.115058	0.0600058	0.168016	405	494	899
comp2265386_c0_seq2_m.60299	0.332719	0.356077	0.0598786	0.0545836	0.114794	0.066092	555	346	901
comp2254456_c0_seq2_m.43993	-0.336591	-0.339163	0.059707	0.0535714	0.114691	0.066474	554	348	902
comp2253856_c0_seq1_m.43254	0.146921	0.146416	0.0175682	0.144998	0.0513531	0.207407	364	539	903
comp2260519_c0_seq10_m.52611	0.206846	0.206234	0.0311316	0.098344	0.074461	0.133909	443	461	904
comp2265883_c1_seq1_m.61140	0.223111	0.219964	0.0342144	0.0875291	0.0805402	0.125571	452	454	906
comp2276377_c0_seq2_m.82218	0.202734	0.206356	0.0305912	0.101872	0.0741436	0.140725	439	467	906
comp2271909_c0_seq2_m.72111	0.193645	0.19522	0.026778	0.107333	0.0671977	0.150515	424	482	906
comp2226333_c0_seq1_m.20670	0.198417	0.196224	0.029064	0.104832	0.0712536	0.147368	434	473	907
comp2273765_c1_seq6_m.76032	-0.354554	-0.383438	0.066963	0.0517265	0.124379	0.0617647	573	335	908
comp2271944_c0_seq11_m.72172	-0.271469	-0.274217	0.0446182	0.0669305	0.0945693	0.104439	502	406	908
comp2270517_c0_seq1_m.69357	0.142628	0.142526	0.0174311	0.148943	0.0510929	0.215328	363	547	910
comp2256770_c0_seq1_m.46959	0.2187	0.220769	0.0377347	0.0930338	0.086108	0.124444	467	446	913
comp2273142_c0_seq1_m.74744	0.14719	0.146686	0.0184263	0.146038	0.0521426	0.210332	375	544	919
gnl_Pdu_trscr_assembly_1_1514_m.69841	-0.247157	-0.255761	0.0464383	0.0799286	0.0970733	0.110312	509	412	921
comp2274043_c0_seq7_m.76739	-0.233134	-0.238576	0.0424678	0.0855846	0.0922806	0.112903	489	434	923
comp2278623_c0_seq6_m.90693	-0.243243	-0.251771	0.0440324	0.0814117	0.093701	0.111639	499	425	924
comp2232909_c0_seq1_m.24034	0.386641	0.37763	0.0790827	0.0486739	0.140742	0.0575758	596	330	926
comp2261121_c0_seq1_m.53764	0.23656	0.243754	0.0452289	0.0847509	0.0950224	0.111111	507	420	927
comp2272299_c0_seq11_m.72914	-0.183661	-0.18541	0.02821	0.116391	0.0698034	0.171371	430	497	927
gnl_Pdu_trscr_assembly_1_20792_m.71829	0.171322	0.172951	0.026182	0.126091	0.0664861	0.177043	419	512	931
comp2270926_c0_seq1_m.70120	0.198882	0.198075	0.0332243	0.106879	0.078557	0.151452	450	486	936
comp1326513_c0_seq1_m.1923	0.299555	0.289853	0.0659762	0.0640056	0.123807	0.094086	567	372	939
comp2277313_c0_seq3_m.84866	0.187534	0.186484	0.0321487	0.115508	0.0763533	0.167677	448	493	941
comp2274031_c0_seq3_m.76707	-0.185209	-0.18786	0.031142	0.116847	0.074461	0.171026	445	496	941
gnl_Pdu_trscr_assembly_1_19681_m.92605	0.169363	0.170171	0.0271942	0.128282	0.0679216	0.181818	426	517	943
comp2270432_c0_seq1_m.69185	-0.166603	-0.166176	0.0264687	0.131984	0.0667362	0.188931	422	521	943
comp2257693_c0_seq3_m.48359	0.203793	0.203112	0.0378856	0.105578	0.086108	0.14916	468	478	946
comp2211270_c0_seq1_m.14951	-0.193956	-0.196472	0.035231	0.112463	0.0822057	0.163265	456	491	947
comp2269738_c0_seq1_m.67939	0.179604	0.181978	0.0310318	0.121995	0.074461	0.17495	444	504	948
comp2269324_c0_seq1_m.67217	0.203236	0.207875	0.0381173	0.106224	0.086108	0.150313	470	481	951
comp2273356_c0_seq1_m.75157	-0.156464	-0.157605	0.02571	0.14221	0.0659166	0.20709	415	538	953
comp2265997_c0_seq1_m.61310	0.14313	0.143104	0.0226201	0.156414	0.0596635	0.223423	401	555	956
comp2261150_c0_seq1_m.53829	-0.159694	-0.158426	0.027058	0.139861	0.0677405	0.204503	425	533	958
comp2217905_c0_seq1_m.17239	-0.196072	-0.197397	0.0387771	0.112554	0.0870982	0.162933	472	490	962
comp2277847_c1_seq10_m.86637	0.167941	0.165807	0.0288138	0.133321	0.0708035	0.191651	433	529	962
comp2277617_c1_seq7_m.85877	0.16462	0.165419	0.030153	0.136802	0.0733726	0.195857	438	531	969
comp2254418_c0_seq1_m.43945	0.213382	0.218011	0.0450362	0.101022	0.0948881	0.137339	504	466	970
comp2274259_c0_seq1_m.77220	-0.181876	-0.178601	0.036379	0.122923	0.083782	0.175889	462	508	970
comp2273628_c0_seq6_m.75728	-0.134375	-0.134708	0.0226542	0.169137	0.0596635	0.243386	403	567	970
comp2271667_c0_seq1_m.71637	-0.154693	-0.155879	0.0274908	0.146312	0.0683417	0.209945	428	543	971
comp2269580_c0_seq1_m.67656	0.175776	0.178802	0.0353892	0.127112	0.0822142	0.178295	458	516	974
comp2268417_c0_seq2_m.65592	-0.31129	-0.288298	0.0831266	0.0652143	0.145456	0.0984043	606	377	983
comp2004487_c0_seq1_m.4269	0.319132	0.343393	0.0891194	0.0646476	0.153299	0.0962567	618	373	991
comp1971911_c0_seq1_m.3786	-0.181653	-0.1816	0.0397885	0.124316	0.088939	0.178082	476	515	991
comp2275857_c0_seq4_m.80830	0.185877	0.187496	0.0416674	0.121905	0.0914484	0.175299	486	506	992
comp2143411_c0_seq1_m.7656	0.199561	0.20427	0.0449516	0.112846	0.0948881	0.164634	503	492	995
comp2276882_c0_seq4_m.83609	0.190557	0.192025	0.0433942	0.118715	0.0929002	0.172	497	499	996
comp2275853_c0_seq1_m.80817	-0.185023	-0.186951	0.0426711	0.123013	0.0922806	0.175542	491	507	998
comp2275495_c0_seq1_m.79975	0.185202	0.186944	0.0439635	0.123278	0.093701	0.175197	498	505	1003
comp2261373_c0_seq1_m.54127	-0.145517	-0.144609	0.030828	0.161369	0.0742104	0.229537	441	563	1004
comp2276151_c0_seq3_m.81648	-0.185768	-0.188711	0.0431276	0.122644	0.0926691	0.176238	496	509	1005
comp2236992_c0_seq1_m.26663	0.145234	0.144446	0.0314362	0.162305	0.0749957	0.22913	446	562	1008
comp2276031_c0_seq51_m.81296	-0.174535	-0.172527	0.0406392	0.133617	0.0900279	0.191288	481	528	1009
comp1234630_c0_seq1_m.1254	0.152572	0.15148	0.0353261	0.154265	0.0822142	0.222826	457	554	1011
comp2258527_c0_seq1_m.49534	-0.18644	-0.18189	0.0468595	0.123658	0.0977618	0.17451	510	502	1012
gnl_Pdu_trscr_assembly_1_7274_m.39240	-0.479619	-0.481737	0.137276	0.0484032	0.212163	0.058104	690	333	1023
comp2250470_c0_seq1_m.38949	0.151699	0.152863	0.0379845	0.158191	0.086108	0.226619	466	559	1025
comp2275833_c0_seq1_m.80771	0.145884	0.144416	0.0362932	0.164913	0.083773	0.234043	461	564	1025
comp2274999_c0_seq4_m.78837	-0.167124	-0.164183	0.0425139	0.14111	0.0922806	0.207477	490	540	1030
comp2279450_c0_seq1_m.91124	-0.159663	-0.158467	0.0407094	0.148484	0.0900279	0.215722	482	548	1030
comp2274238_c3_seq9_m.77182	0.180015	0.179188	0.0478717	0.129758	0.0990962	0.184971	514	518	1032
comp2262740_c0_seq13_m.56232	-0.154839	-0.154104	0.0416905	0.155667	0.0914484	0.222022	485	552	1037
comp2261058_c0_seq1_m.53667	0.166376	0.168731	0.0452786	0.143344	0.0950224	0.205937	506	534	1040
comp2072973_c0_seq1_m.5296	-0.156336	-0.158044	0.0427873	0.153796	0.0923442	0.221416	493	551	1044
comp2274358_c0_seq3_m.77437	0.145823	0.146063	0.0408121	0.169412	0.0900279	0.242958	480	566	1046
comp2269814_c0_seq1_m.68069	-0.167666	-0.17058	0.0475275	0.142975	0.0985756	0.20632	513	535	1048
comp2277675_c0_seq81_m.86041	-0.123843	-0.124077	0.0343815	0.203232	0.0807548	0.29868	453	606	1059
comp2272641_c0_seq2_m.73619	-0.115436	-0.115387	0.0328565	0.214711	0.0778604	0.312804	449	616	1065
comp2231610_c0_seq1_m.23229	0.129088	0.130005	0.0395114	0.198107	0.0885055	0.288557	475	602	1077
comp2266755_c0_seq1_m.62616	0.124195	0.123738	0.0401984	0.209316	0.0896425	0.306557	478	609	1087
comp2279297_c0_seq1_m.91091	0.141904	0.142423	0.047308	0.181185	0.098312	0.252595	512	576	1088
comp2233777_c0_seq1_m.24586	-0.128962	-0.128101	0.042345	0.201894	0.0922806	0.297521	487	605	1092
gnl_Pdu_trscr_assembly_1_1644_m.62862	-0.143934	-0.141865	0.0481407	0.179047	0.0994595	0.253472	515	579	1094
comp2266507_c0_seq10_m.62138	0.138974	0.138758	0.045972	0.185883	0.0962878	0.259829	508	587	1095
comp1916779_c0_seq1_m.2944	-0.120046	-0.120444	0.0402717	0.218286	0.0896425	0.314103	477	623	1100
comp2268857_c0_seq2_m.66328	-0.112146	-0.112036	0.037943	0.227352	0.086108	0.319182	469	634	1103
comp2277230_c0_seq15_m.84634	-0.124286	-0.123483	0.0426189	0.210993	0.0922806	0.309951	492	612	1104
gnl_Pdu_trscr_assembly_1_12504_m.67029	-0.110396	-0.110278	0.0440057	0.239518	0.093701	0.347222	500	656	1156
comp2268903_c0_seq4_m.66397	-0.109161	-0.109034	0.0448657	0.242929	0.0948881	0.347158	505	655	1160

## Sheet: IM_FRFM vs PM_FRFM_Female
	limma.logFC	rots.logFC	limma.pvalue	rots.pvalue	limma.adj.pvalue	rots.adj.pvalue	limma.rank	rots.rank	rank.sum
comp2189372_c0_seq1_m.11219	-1.62063	-1.63967	1.21e-05	0.00081203	0.00158146	0	1	1	2
comp2237468_c0_seq1_m.27022	-2.19672	-2.21947	5.31e-06	9.02256e-05	0.00158146	0	2	2	4
comp2271737_c1_seq2_m.71770	-1.82857	-1.82515	8.22e-06	0.000541353	0.00158146	0	3	3	6
comp2272691_c0_seq4_m.73750	1.18794	1.1891	9.34e-06	0.00108271	0.00158146	0	4	4	8
comp2274909_c0_seq7_m.78613	1.74395	1.75301	2.32e-06	0.000360902	0.00158146	0	5	5	10
comp2274909_c0_seq7_m.78615	1.84241	1.85836	7.43e-06	0.000451128	0.00158146	0	6	6	12
comp2275893_c0_seq1_m.80933	-1.55455	-1.55803	5.86e-06	0.000721805	0.00158146	0	7	7	14
gnl_Pdu_trscr_assembly_1_15590_m.29311	1.9295	1.94573	1.34e-05	0.000270677	0.00158146	0	8	8	16
gnl_Pdu_trscr_assembly_1_200732_m.91056	-1.69236	-1.70722	1.29e-05	0.000631579	0.00158146	0	9	9	18
comp2208474_c0_seq1_m.14351	-1.332	-1.33945	1.84e-05	0.000902256	0.00170084	0	10	10	20
comp2265656_c0_seq3_m.60780	1.13979	1.13737	1.72e-05	0.00135338	0.00170084	0	11	11	22
comp2273926_c0_seq5_m.76421	1.24102	1.24603	1.92e-05	0.00117293	0.00170084	0	12	12	24
comp2257070_c0_seq2_m.47512	1.28126	1.27587	2.15e-05	0.000992481	0.00172831	0	13	13	26
comp2272437_c1_seq1_m.73204	-2.34384	-2.36711	2.27e-05	0.000180451	0.00172831	0	14	14	28
comp2223962_c0_seq7_m.19686	-1.09316	-1.09665	2.73e-05	0.00171429	0.00193409	0	15	15	30
gnl_Pdu_trscr_assembly_1_12794_m.61443	0.981855	0.982623	3.14e-05	0.00216541	0.00208577	0	16	16	32
comp2275714_c2_seq1_m.80469	-1.03794	-1.04004	4.33e-05	0.00198496	0.00271259	0	17	17	34
comp2264888_c0_seq4_m.59493	1.21405	1.20005	5.1e-05	0.00144361	0.00285718	0	18	18	36
comp2278010_c1_seq9_m.87231	-1.01886	-1.01496	4.91e-05	0.00225564	0.00285718	0	19	19	38
comp2268978_c0_seq1_m.66540	0.942516	0.941873	8.42e-05	0.00381203	0.00374817	0	20	20	40
comp2271419_c1_seq1_m.71009	0.983062	0.977616	8.32e-05	0.00335338	0.00374817	0	21	21	42
comp2271594_c0_seq8_m.71451	-0.851474	-0.850668	7.09e-05	0.00463064	0.00374817	0	22	22	44
comp2277374_c0_seq2_m.85051	0.944533	0.946114	7.83e-05	0.00353383	0.00374817	0	23	23	46
comp2280591_c0_seq1_m.91233	1.09886	1.11029	8.45e-05	0.00189474	0.00374817	0	24	24	48
comp2275853_c0_seq1_m.80817	0.854104	0.854492	9.3e-05	0.00499154	0.00395953	0	25	25	50
comp2254346_c0_seq1_m.43876	1.01128	1.00855	0.000102709	0.00298496	0.00420317	0	26	26	52
comp2229729_c0_seq1_m.22264	1.03748	1.02456	0.000130457	0.00271429	0.00478642	0	27	27	54
comp2257585_c0_seq1_m.48216	0.947365	0.946553	0.000130213	0.00408271	0.00478642	0	28	28	56
comp2269321_c1_seq1_m.67212	-1.01616	-1.02111	0.000122214	0.00326316	0.00478642	0	29	29	58
comp2269185_c0_seq2_m.66963	-1.27241	-1.28349	0.000150458	0.00162406	0.00533624	0	30	30	60
comp2266841_c0_seq1_m.62766	0.99339	0.994508	0.000160565	0.00344361	0.005511	0	31	31	62
comp1194290_c0_seq1_m.781	-1.32722	-1.33886	0.000171273	0.00126316	0.00569484	0	32	32	64
comp2245014_c0_seq2_m.33157	-1.10945	-1.1269	0.000188998	0.00234586	0.00609374	0	33	33	66
comp1196959_c0_seq2_m.1014	0.907404	0.898494	0.000196317	0.00508177	0.00614356	0	34	34	68
comp2268473_c1_seq1_m.65668	1.0849	1.08175	0.000214765	0.00262406	0.00634749	0	36	35	71
comp2264838_c0_seq3_m.59436	-1.23844	-1.26225	0.000225085	0.00180451	0.00647272	0	37	36	73
comp2276668_c0_seq1_m.83017	-0.923272	-0.923642	0.000239046	0.00490132	0.00652165	0	38	37	75
comp2277416_c0_seq3_m.85174	0.975278	0.978796	0.000236628	0.00426316	0.00652165	0	39	38	77
comp2276805_c0_seq8_m.83380	0.877632	0.87468	0.00024572	0.00535244	0.00653615	0	40	39	79
comp2275391_c0_seq1_m.79711	-0.995237	-1.01051	0.000281434	0.00417293	0.00730357	0	41	40	81
comp2262731_c0_seq1_m.56213	0.876025	0.864928	0.000325999	0.0055282	0.00792244	0	42	41	83
comp2274137_c1_seq25_m.76929	-1.35615	-1.37134	0.000317579	0.00153383	0.00792244	0	44	42	86
comp2269459_c0_seq2_m.67456	0.954825	0.944112	0.00034413	0.00481109	0.00813676	0	45	43	88
comp2270576_c0_seq1_m.69463	0.99689	0.98351	0.00036908	0.00435338	0.00853699	0	46	44	90
comp2268869_c0_seq6_m.66344	1.10837	1.11943	0.000390412	0.00280451	0.0086602	0	47	45	92
comp2242407_c0_seq1_m.30845	1.19204	1.2065	0.000411288	0.00207519	0.0087522	0	50	46	96
comp1953077_c0_seq1_m.3483	-0.943671	-0.951874	0.000615135	0.00526222	0.0104116	0	56	47	103
comp2268937_c0_seq1_m.66472	0.706524	0.705831	0.00032762	0.00941729	0.00792244	0.010989	43	67	110
comp2279748_c0_seq1_m.91174	-0.717538	-0.715019	0.000402842	0.00950752	0.00874741	0.0108696	49	66	115
comp2278405_c0_seq22_m.88893	0.722806	0.721	0.000390686	0.00932707	0.0086602	0.0111111	48	68	116
comp2272842_c0_seq2_m.74081	-1.07229	-1.09981	0.000776228	0.00399248	0.0117987	0	70	48	118
comp2276528_c1_seq4_m.82615	0.713508	0.71071	0.000589013	0.0103365	0.0104116	0.01	61	58	119
comp2273900_c0_seq1_m.76336	-1.02597	-1.04348	0.000850457	0.00472086	0.0123957	0	73	49	122
comp2274295_c0_seq2_m.77311	0.737861	0.740307	0.000482117	0.00923684	0.0094995	0.011236	54	69	123
comp2277947_c0_seq1_m.86990	-0.748541	-0.749666	0.000458989	0.00857519	0.00921442	0.0119048	52	74	126
comp2225664_c0_seq1_m.20382	0.749565	0.745533	0.000561036	0.00914662	0.0104116	0.0113636	57	70	127
comp2263921_c0_seq2_m.58101	1.00464	1.00579	0.00101206	0.00253383	0.0137839	0	78	50	128
comp2276577_c0_seq8_m.92288	0.731613	0.72953	0.000709825	0.010156	0.0111067	0.0102041	68	60	128
comp2278480_c0_seq4_m.89330	0.791649	0.7884	0.000203469	0.00644549	0.00618544	0.0153846	35	93	128
comp2269009_c0_seq1_m.66627	-0.755985	-0.756927	0.00055999	0.00896617	0.0104116	0.0116279	59	72	131
comp2264302_c0_seq2_m.58699	-0.74609	-0.754461	0.000678134	0.00970489	0.01088	0.0107527	67	65	132
comp2279340_c0_seq1_m.91103	0.742728	0.746929	0.00098858	0.0102462	0.0136604	0.010101	77	59	136
gnl_Pdu_trscr_assembly_1_7327_m.81715	-0.953189	-0.980966	0.00120545	0.00561842	0.014575	0	88	51	139
comp2141997_c0_seq1_m.7386	0.996165	0.960254	0.00130145	0.00517199	0.0147007	0	89	52	141
comp2280482_c0_seq1_m.91228	-0.793037	-0.803588	0.000616478	0.00781391	0.0104116	0.0126582	63	79	142
comp2257905_c0_seq1_m.48664	-0.768902	-0.780153	0.00114559	0.00997556	0.0141294	0.0104167	83	62	145
gnl_Pdu_trscr_assembly_1_200732_m.91055	-1.07274	-1.10387	0.00125255	0.00454041	0.0147007	0	95	53	148
comp2138952_c0_seq1_m.6867	0.807349	0.802207	0.000685114	0.00745301	0.01088	0.0133333	66	83	149
comp2252059_c0_seq1_m.40786	0.810431	0.797695	0.000659317	0.00736278	0.0107925	0.0135135	65	84	149
gnl_Pdu_trscr_assembly_1_16296_m.13041	-0.851052	-0.856104	0.000455519	0.00617481	0.00921442	0.016129	53	96	149
comp2272435_c0_seq2_m.73201	0.924168	0.922875	0.00137456	0.0037218	0.0152347	0	96	54	150
comp2262241_c0_seq1_m.55434	0.800454	0.786999	0.00104302	0.00799436	0.0138722	0.0123457	80	77	157
comp2257070_c0_seq2_m.47513	0.66318	0.665157	0.000518547	0.0124906	0.0100315	0.0176991	55	105	160
comp2269158_c0_seq1_m.66914	0.669048	0.669314	0.000428181	0.0113853	0.00893304	0.0190476	51	113	164
comp2247098_c0_seq1_m.35275	1.24952	1.23696	0.00214673	0.00289474	0.0195762	0	111	55	166
comp1953876_c0_seq1_m.3493	0.795338	0.776057	0.00184071	0.00988534	0.0188319	0.0105263	104	63	167
comp2263787_c0_seq3_m.57874	0.844411	0.844579	0.00113969	0.00727256	0.0141294	0.0136986	84	85	169
comp2270845_c1_seq1_m.69967	0.889109	0.869266	0.000818449	0.00599436	0.0120949	0.0166667	72	98	170
comp2273417_c0_seq5_m.75297	-0.680647	-0.676969	0.000644327	0.0124004	0.0107119	0.0178571	64	106	170
comp2278077_c0_seq3_m.87468	0.820534	0.820617	0.00160238	0.00837782	0.0172215	0.0120482	99	75	174
comp2277945_c0_seq2_m.86985	0.922137	0.900003	0.000879633	0.00581391	0.0126477	0.0172414	74	101	175
comp2270385_c0_seq11_m.69105	1.15771	1.1357	0.00230603	0.00317293	0.0201116	0	122	56	178
comp2278630_c0_seq8_m.90809	-0.705595	-0.710745	0.000577096	0.0106175	0.0104116	0.019802	62	117	179
comp2272882_c0_seq14_m.74184	-0.825079	-0.84051	0.00198961	0.00887594	0.0195673	0.0117647	108	73	181
comp2260394_c0_seq1_m.52394	-0.623232	-0.623649	0.000608841	0.0137199	0.0104116	0.025	58	124	182
gi_613484551	0.710028	0.701972	0.000804551	0.0114756	0.0120569	0.0188679	71	112	183
comp2277680_c0_seq25_m.86056	-0.892409	-0.911126	0.00131256	0.00662594	0.0147007	0.0149254	93	91	184
comp2267571_c0_seq4_m.64058	-0.937327	-0.965535	0.00114111	0.00590414	0.0141294	0.0169492	85	99	184
comp2275933_c0_seq1_m.81045	0.637782	0.636481	0.000589746	0.0135226	0.0104116	0.0252101	60	125	185
gnl_Pdu_trscr_assembly_1_7274_m.39240	0.708292	0.703444	0.00102343	0.0122199	0.0137839	0.0181818	79	108	187
comp2270404_c0_seq3_m.69137	-0.863021	-0.893353	0.00196427	0.00763346	0.0195325	0.012987	107	81	188
gnl_Pdu_trscr_assembly_1_3048_m.12984	1.19692	1.21151	0.00268075	0.00390226	0.0216085	0	132	57	189
comp2275674_c1_seq1_m.80370	-0.934534	-0.953077	0.00172766	0.00608459	0.0180219	0.0163934	101	97	198
comp2277142_c0_seq6_m.84365	0.870195	0.851171	0.00221473	0.00772368	0.0196373	0.0128205	120	80	200
comp2278276_c0_seq16_m.88350	0.641071	0.637328	0.00107138	0.0146729	0.0139018	0.0241935	82	120	202
comp2278480_c1_seq1_m.89333	0.602606	0.601205	0.000907982	0.0164549	0.0128812	0.0294118	75	130	205
comp2265471_c0_seq5_m.60488	0.842697	0.808083	0.00287348	0.00905639	0.0219679	0.0114943	137	71	208
comp2265768_c0_seq2_m.60943	-0.829081	-0.851864	0.00386626	0.0100658	0.0270743	0.0103093	152	61	213
comp2250550_c1_seq1_m.39064	0.746782	0.738566	0.0019034	0.0120395	0.0192477	0.0185185	105	110	215
comp2268340_c1_seq1_m.65478	0.620183	0.618392	0.00106752	0.0160818	0.0139018	0.0298507	81	135	216
comp2278605_c1_seq8_m.90480	0.596642	0.597163	0.00073591	0.0154333	0.011348	0.03125	69	148	217
comp2261379_c0_seq1_m.54133	0.954048	0.965306	0.00254133	0.00626504	0.0212021	0.015873	127	95	222
comp2269345_c0_seq1_m.67253	0.622372	0.620311	0.000967911	0.0155235	0.0135508	0.0310078	76	146	222
comp2270876_c0_seq2_m.70018	-0.846764	-0.884049	0.00424899	0.00979511	0.0280803	0.0106383	160	64	224
comp1910314_c0_seq1_m.2848	-0.885718	-0.927216	0.0031669	0.00790414	0.0227675	0.0125	147	78	225
comp2274106_c1_seq2_m.76871	0.929027	0.913647	0.00288291	0.00689662	0.0219679	0.0142857	138	88	226
comp2275191_c1_seq2_m.79282	0.557588	0.558946	0.00144272	0.0217632	0.0158253	0.0295858	97	132	229
comp2201786_c0_seq1_m.13247	0.957124	0.984012	0.00283211	0.00635526	0.0219679	0.015625	136	94	230
comp2273778_c1_seq23_m.76059	0.634682	0.630672	0.00127752	0.0157942	0.0147007	0.030303	91	139	230
comp2236614_c0_seq1_m.26450	0.567136	0.569384	0.00130662	0.0205789	0.0147007	0.0308642	90	145	235
comp2265049_c0_seq3_m.59764	0.952215	0.900754	0.0039038	0.00680639	0.0270743	0.0144928	151	89	240
comp2254426_c0_seq1_m.43954	-0.93176	-0.986245	0.00402996	0.00718233	0.0276637	0.0138889	155	86	241
comp2277729_c0_seq10_m.86207	0.646665	0.637962	0.00158743	0.0156137	0.0172215	0.0307692	98	144	242
comp2277132_c1_seq1_m.84335	0.689648	0.689556	0.00475188	0.00818233	0.0302754	0.0121951	167	76	243
comp2277933_c1_seq7_m.86946	0.566706	0.567489	0.00127534	0.0203985	0.0147007	0.03125	94	149	243
comp2249227_c0_seq1_m.37479	-0.758145	-0.769865	0.00304458	0.0126861	0.0226534	0.0175439	143	104	247
comp2272547_c0_seq4_m.73421	-0.585503	-0.586274	0.00209297	0.0214013	0.0195762	0.0297619	114	134	248
comp2252847_c0_seq1_m.41763	0.584093	0.583654	0.00202801	0.0212237	0.0195762	0.0299401	112	136	248
comp2270228_c0_seq1_m.68797	0.578897	0.578831	0.00115532	0.0188947	0.0141294	0.0331126	86	162	248
comp2281676_c0_seq1_m.91255	0.949145	0.939331	0.00447183	0.00709211	0.0291904	0.0140845	163	87	250
comp2275191_c0_seq1_m.79281	0.581331	0.579492	0.00115521	0.0185376	0.0141294	0.033557	87	167	254
comp2242933_c0_seq1_m.31351	-0.793059	-0.823491	0.00311306	0.0107077	0.022687	0.0196078	144	116	260
comp1785956_c0_seq1_m.2259	0.589351	0.589505	0.00261363	0.0219427	0.0213551	0.0294118	130	131	261
comp1244797_c0_seq1_m.1278	0.593456	0.590091	0.0024221	0.0211335	0.020563	0.0301205	124	138	262
gnl_Pdu_trscr_assembly_1_1514_m.69841	0.594031	0.598895	0.00205127	0.0204887	0.0195762	0.0310559	117	147	264
comp2272319_c0_seq24_m.72950	0.66813	0.66006	0.00214637	0.015343	0.0195762	0.0314961	113	151	264
comp2276825_c0_seq1_m.83424	0.59418	0.591309	0.00128976	0.0181692	0.0147007	0.0342466	92	173	265
comp2261716_c0_seq2_m.54597	0.549642	0.551059	0.00168933	0.0234295	0.0179745	0.0335196	100	166	266
comp2275358_c0_seq1_m.79627	-0.553807	-0.557286	0.00191753	0.024094	0.0192477	0.032967	106	161	267
comp2270220_c0_seq1_m.68776	0.77074	0.73635	0.00502442	0.0131664	0.031447	0.0172414	170	102	272
comp2278238_c0_seq6_m.88188	0.604117	0.595013	0.00277701	0.0208477	0.0218869	0.0304878	135	141	276
comp2271595_c0_seq2_m.71452	0.673549	0.662714	0.00294613	0.0159915	0.0222318	0.0300752	141	137	278
comp2278509_c0_seq8_m.89637	0.567487	0.564084	0.00180784	0.0223195	0.0186752	0.0348837	103	179	282
comp2252746_c0_seq1_m.41651	-0.675129	-0.657825	0.0041453	0.0168308	0.0279384	0.028777	158	127	285
comp2247821_c0_seq5_m.35979	0.984144	0.9257	0.00904587	0.00754323	0.0465509	0.0131579	205	82	287
comp2278474_c0_seq1_m.89294	-0.747953	-0.734708	0.00423246	0.0134323	0.0280803	0.0254237	161	126	287
comp2269171_c0_seq3_m.66933	0.619793	0.613387	0.00234759	0.0188045	0.0203076	0.0333333	123	164	287
comp2263073_c0_seq1_m.56786	-0.567363	-0.568294	0.00243509	0.0238008	0.020563	0.0331492	125	163	288
gnl_Pdu_trscr_assembly_1_14638_m.60097	-0.684168	-0.69632	0.00406335	0.016172	0.0277142	0.0296296	156	133	289
comp2273747_c0_seq4_m.75989	0.632209	0.623047	0.00200455	0.0172133	0.0195673	0.035461	109	183	292
comp2272863_c1_seq5_m.74143	-0.626279	-0.63872	0.00277137	0.018985	0.0218869	0.0328947	133	160	293
comp2269987_c0_seq2_m.68354	0.575599	0.581507	0.00218139	0.0225977	0.0196373	0.0344828	119	175	294
comp2266701_c0_seq3_m.62512	1.0494	1.00693	0.00905643	0.00671617	0.0465509	0.0147059	206	90	296
comp2273765_c1_seq6_m.76032	0.796771	0.812133	0.00721644	0.0129709	0.0394179	0.0173913	195	103	298
comp2260960_c0_seq2_m.53456	0.721182	0.723484	0.00629079	0.011844	0.0357936	0.0186916	187	111	298
comp2279567_c0_seq1_m.91146	0.72192	0.699982	0.00563372	0.014968	0.0333015	0.024	180	119	299
comp2276377_c0_seq2_m.82218	-0.510768	-0.510621	0.00171637	0.0273355	0.0180219	0.0502513	102	198	300
comp2263508_c0_seq1_m.57408	0.628666	0.633247	0.00224938	0.0175808	0.0197797	0.034965	121	180	301
comp2257487_c0_seq1_m.48064	-0.629235	-0.628394	0.0031047	0.0193618	0.022687	0.0324675	146	156	302
comp2254641_c1_seq1_m.44200	-0.577819	-0.577237	0.00310284	0.0242744	0.022687	0.0326087	145	157	302
comp2273038_c0_seq3_m.74522	0.584136	0.581142	0.00277154	0.0229605	0.0218869	0.0338983	134	170	304
comp2273141_c0_seq2_m.74737	0.545884	0.54241	0.00210489	0.0258656	0.0195762	0.0418848	115	190	305
comp2265328_c0_seq2_m.60206	-1.07412	-1.18768	0.010715	0.00653571	0.0522043	0.0151515	219	92	311
comp1876805_c0_seq1_m.2339	0.515325	0.515155	0.00215265	0.0292086	0.0195762	0.0528846	110	201	311
comp2267341_c0_seq1_m.63653	-0.549176	-0.551558	0.00240437	0.0263214	0.020563	0.0412371	126	187	313
gnl_Pdu_trscr_assembly_1_17807_m.62055	0.55305	0.552013	0.00255063	0.0262312	0.0212021	0.0414508	128	188	316
comp2267483_c0_seq3_m.63903	-0.706356	-0.736147	0.00666757	0.0165451	0.0376131	0.0291971	188	129	317
comp2232805_c0_seq1_m.23974	0.538215	0.539558	0.00220319	0.0272453	0.0196373	0.0505051	118	199	317
comp2276750_c0_seq1_m.83194	0.518477	0.517617	0.00206277	0.0282622	0.0195762	0.0541872	116	206	322
comp2271637_c0_seq1_m.71562	0.59873	0.584409	0.00450687	0.0235197	0.0292397	0.0333333	164	165	329
comp2278133_c0_seq3_m.87701	0.5691	0.562934	0.00282082	0.0251062	0.0219679	0.0427807	140	194	334
comp2260103_c0_seq1_m.51994	-0.653187	-0.650896	0.00580288	0.0198261	0.0339245	0.0318471	182	153	335
comp2268906_c0_seq4_m.66401	0.538819	0.540852	0.00258116	0.027968	0.0212896	0.0544554	129	207	336
comp2280694_c0_seq1_m.91236	0.862674	0.847292	0.0117586	0.0121297	0.0543963	0.0183486	230	109	339
comp2280536_c0_seq1_m.91231	-0.702523	-0.714532	0.0111394	0.015156	0.0536306	0.0238095	221	118	339
comp2232909_c0_seq1_m.24034	0.656949	0.660875	0.0060423	0.0196476	0.034605	0.0320513	185	154	339
gnl_Pdu_trscr_assembly_1_17049_m.35386	-0.866716	-0.894839	0.0126704	0.0109925	0.0571243	0.0194175	236	115	351
comp2232290_c0_seq2_m.23637	0.735462	0.706583	0.0113392	0.0166353	0.0538645	0.0289855	223	128	351
comp2248791_c1_seq1_m.37027	0.669385	0.642337	0.00831544	0.0200038	0.0438002	0.0316456	202	152	354
comp2275523_c0_seq29_m.80039	0.67634	0.646392	0.00787519	0.0191823	0.0423192	0.0326797	198	158	356
comp2272118_c0_seq11_m.72524	0.590818	0.576734	0.00463337	0.0253769	0.0296982	0.0421053	165	191	356
comp2277388_c0_seq8_m.85093	-0.55958	-0.563022	0.00362833	0.0278778	0.025737	0.0547264	150	208	358
comp2274358_c0_seq3_m.77437	0.493209	0.494266	0.00262925	0.0330602	0.0213551	0.0934579	131	231	362
comp2274262_c0_seq1_m.77231	-0.764911	-0.789502	0.0149934	0.0143008	0.0648497	0.0243902	246	121	367
comp2272782_c0_seq2_m.73955	-0.679319	-0.707579	0.00687697	0.0180789	0.0383094	0.0344828	191	176	367
comp2269593_c0_seq3_m.67692	0.494144	0.493659	0.003016	0.0345536	0.0225987	0.0909091	142	225	367
comp2258609_c0_seq1_m.49647	0.754691	0.70514	0.0114257	0.0157039	0.053869	0.0305344	226	142	368
comp2231610_c0_seq1_m.23229	0.497172	0.499221	0.00349742	0.0352726	0.0249748	0.0892857	149	219	368
comp2276968_c0_seq3_m.83862	0.511821	0.507941	0.00315382	0.0321053	0.0227675	0.0896226	148	220	368
comp2250982_c0_seq1_m.39507	0.876733	0.785909	0.0196257	0.0132566	0.0775471	0.017094	269	100	369
comp2276966_c0_seq13_m.83854	-0.50015	-0.50283	0.00289052	0.0331504	0.0219679	0.0930233	139	230	369
comp2266931_c0_seq5_m.62893	0.684739	0.685747	0.00823058	0.0184474	0.0437759	0.0337838	201	169	370
comp2224614_c0_seq1_m.19939	0.50176	0.497995	0.00417501	0.0359182	0.0279384	0.0873362	157	214	371
comp2204754_c0_seq1_m.13720	0.686111	0.673803	0.0072612	0.0176711	0.0394179	0.0347222	194	178	372
comp2274999_c0_seq4_m.78837	0.582795	0.567709	0.0051945	0.0268524	0.0321587	0.0507614	172	200	372
comp2269814_c0_seq1_m.68069	0.504243	0.500307	0.00387152	0.035094	0.0270743	0.0896861	153	221	374
comp2278485_c0_seq1_m.89374	0.686103	0.646181	0.0126254	0.0206692	0.0571243	0.0306748	235	143	378
comp2265326_c0_seq3_m.60204	0.536864	0.537219	0.00482213	0.0313365	0.0303594	0.0663507	168	211	379
comp2275406_c1_seq7_m.79751	0.503276	0.506443	0.00461656	0.0362838	0.0296982	0.0869565	166	213	379
comp2246502_c0_seq1_m.34680	-0.706522	-0.740919	0.00826969	0.0171231	0.0437759	0.0357143	200	184	384
comp2274783_c0_seq9_m.78326	0.647921	0.616818	0.00986634	0.022688	0.0497525	0.0342857	211	174	385
comp2268115_c0_seq2_m.65034	-0.553271	-0.564725	0.00553378	0.0302585	0.0331402	0.0574163	178	209	387
gnl_Pdu_trscr_assembly_1_7964_m.49648	0.481081	0.480346	0.00391866	0.0379831	0.0270743	0.0944206	154	233	387
comp2261018_c0_seq2_m.53614	-0.571022	-0.581688	0.00583819	0.0283524	0.0339444	0.0539216	183	205	388
comp2279450_c0_seq1_m.91124	0.57271	0.556876	0.00668128	0.0291184	0.0376131	0.0531401	189	202	391
comp2271113_c0_seq5_m.70438	0.705273	0.669547	0.00962015	0.0174906	0.0487421	0.0352113	210	182	392
comp2269850_c0_seq1_m.68122	0.626606	0.622538	0.00902193	0.0245385	0.0465509	0.0378378	207	185	392
comp2265464_c0_seq1_m.60472	-0.651094	-0.679761	0.0116156	0.0230508	0.0539696	0.0337079	229	168	397
comp2263612_c1_seq1_m.57550	-0.654653	-0.663932	0.0105591	0.0222293	0.0522043	0.0350877	216	181	397
comp2270650_c0_seq1_m.69588	-0.52057	-0.515106	0.00571642	0.035453	0.0336037	0.0884956	181	217	398
comp2274238_c3_seq9_m.77182	0.486185	0.48339	0.00435395	0.0381701	0.0285963	0.0982906	162	243	405
comp1916779_c0_seq1_m.2944	-0.519899	-0.531193	0.00763633	0.0368299	0.0412439	0.0865801	197	212	409
comp2252506_c0_seq1_m.41372	0.941806	0.824393	0.025593	0.0123102	0.0895756	0.018018	304	107	411
comp2138394_c0_seq1_m.6761	0.529689	0.520007	0.00589293	0.0342679	0.0340765	0.0917431	184	227	411
comp2262197_c0_seq1_m.55346	0.568896	0.555788	0.00851735	0.0305526	0.0446427	0.0619048	203	210	413
comp2257633_c0_seq1_m.48279	-0.490888	-0.487649	0.00552064	0.0394756	0.0331402	0.0962343	177	238	415
comp2274301_c0_seq6_m.77327	0.48246	0.479126	0.00519859	0.0407838	0.0321587	0.0983607	171	244	415
comp2266441_c0_seq1_m.62027	0.598196	0.594503	0.0107494	0.0287434	0.0522043	0.0533981	220	203	423
comp2272491_c1_seq4_m.73302	-0.49494	-0.498034	0.00604936	0.0395658	0.034605	0.0958333	186	237	423
comp2273142_c0_seq1_m.74744	-0.450948	-0.450979	0.00528216	0.0481795	0.0324868	0.101504	173	250	423
comp2254675_c0_seq1_m.44244	-0.4695	-0.472034	0.00556386	0.0448759	0.0331402	0.101167	176	249	425
comp2269201_c0_seq1_m.67004	-0.541836	-0.528861	0.00882739	0.0350038	0.0460409	0.0900901	204	222	426
comp2275662_c1_seq10_m.80344	0.500666	0.491004	0.00714316	0.0399417	0.0393799	0.0946502	193	234	427
comp2265029_c1_seq4_m.59734	0.543209	0.527708	0.0101805	0.0355432	0.0510945	0.0881057	212	216	428
gnl_Pdu_trscr_assembly_1_11633_m.54013	-0.679721	-0.711661	0.0170031	0.0227782	0.0703942	0.0340909	257	172	429
comp2259363_c0_seq16_m.50888	0.466378	0.463766	0.00416471	0.0417218	0.0279384	0.105263	159	270	429
comp2261355_c0_seq1_m.54106	-0.643443	-0.677487	0.0130891	0.0251964	0.0582712	0.0425532	239	193	432
comp2277908_c1_seq11_m.86865	0.678934	0.635422	0.0207859	0.0241842	0.0804224	0.0327869	275	159	434
comp2278378_c0_seq4_m.88778	0.505733	0.496481	0.00722912	0.0390949	0.0394179	0.0966387	196	239	435
comp2273216_c0_seq3_m.74900	0.472693	0.468741	0.00479968	0.0420066	0.0303594	0.104839	169	268	437
comp2347711_c0_seq1_contamination_m.91628	-1.02719	-1.20206	0.034909	0.0112951	0.114287	0.0192308	325	114	439
comp2263771_c0_seq2_m.57851	0.552636	0.533154	0.0107941	0.034828	0.0522043	0.0904977	217	223	440
gnl_Pdu_trscr_assembly_1_3867_m.65412	0.655902	0.649465	0.0160941	0.0252867	0.0684966	0.042328	250	192	442
comp2264621_c0_seq1_m.59138	-0.449861	-0.451206	0.00537908	0.0486429	0.0328928	0.104869	174	269	443
comp2258619_c0_seq2_m.49656	0.719417	0.693358	0.0203985	0.0183571	0.0793615	0.0340136	274	171	445
comp1838578_c0_seq1_m.2293	0.754292	0.690281	0.0246339	0.0194521	0.0893084	0.0322581	293	155	448
comp1194294_c0_seq1_m.785	0.913138	1.00965	0.0358878	0.0138102	0.115778	0.0247934	327	123	450
comp2277496_c1_seq4_m.85444	-0.483776	-0.486656	0.00557528	0.041281	0.0331402	0.106122	179	272	451
comp2273190_c0_seq1_m.74828	-0.487732	-0.493184	0.00711084	0.0433261	0.0393799	0.103175	192	260	452
comp2238888_c1_seq2_m.28027	0.440888	0.439203	0.00550257	0.0499201	0.0331402	0.10989	175	278	453
comp2277982_c0_seq2_m.87136	0.567673	0.544772	0.012004	0.0332406	0.0550527	0.0925926	232	229	461
comp2201655_c0_seq1_m.13229	0.495841	0.484184	0.0103145	0.0451767	0.0515243	0.100775	213	248	461
comp2277759_c0_seq3_m.86312	0.469703	0.460988	0.00949334	0.0494596	0.0483297	0.102941	209	258	467
comp2245053_c0_seq1_m.33185	0.710821	0.65079	0.024508	0.0224098	0.0893033	0.0346821	292	177	469
comp2271413_c1_seq5_m.70995	-0.573664	-0.601642	0.0146949	0.0340019	0.063818	0.0921659	245	228	473
comp2276804_c0_seq1_m.83376	-0.575877	-0.579232	0.0162761	0.0344633	0.0689265	0.0913242	252	226	478
gnl_Pdu_trscr_assembly_1_9334_m.28552	0.424052	0.42616	0.0067441	0.0571429	0.037767	0.123711	190	291	481
comp2263394_c0_seq1_m.57263	0.9408	0.773663	0.0458594	0.0141128	0.135165	0.0245902	361	122	483
comp2244716_c0_seq1_m.32883	0.504531	0.508946	0.0128352	0.0455432	0.0575397	0.1	237	246	483
comp2287273_c0_seq1_contamination_m.91384	0.578886	0.548251	0.0196783	0.0353628	0.0775471	0.0888889	270	218	488
comp2249005_c0_seq2_m.37257	0.481258	0.474948	0.0115341	0.0491889	0.0539384	0.103321	227	261	488
comp2232641_c0_seq7_m.23875	-0.675374	-0.737017	0.026343	0.0265009	0.0918982	0.0410256	305	186	491
comp2226643_c0_seq1_m.20830	-0.511326	-0.528564	0.0136561	0.0445197	0.0600418	0.101961	242	253	495
comp2254456_c0_seq2_m.43993	0.515678	0.515024	0.0140623	0.0436034	0.0615733	0.102767	243	257	500
comp2261876_c0_seq1_m.54865	0.650058	0.602118	0.0252069	0.0285479	0.0895023	0.0536585	298	204	502
comp2274888_c0_seq2_m.78557	0.442004	0.436731	0.0103996	0.0584173	0.0517064	0.122867	214	289	503
comp2277722_c0_seq17_m.86189	-0.475359	-0.470058	0.0119206	0.05075	0.0549068	0.108696	231	275	506
comp2237053_c0_seq1_m.26700	0.468588	0.472995	0.0114421	0.0516927	0.053869	0.110714	225	281	506
comp2275833_c0_seq1_m.80771	-0.407343	-0.408849	0.00810604	0.0642707	0.0433408	0.140523	199	308	507
comp2270905_c1_seq5_m.70069	-0.792879	-0.912772	0.0464665	0.020938	0.136143	0.030303	369	140	509
gnl_Pdu_trscr_assembly_1_2589_m.58494	-0.420142	-0.416925	0.00933019	0.0631711	0.0477275	0.138614	208	301	509
comp2265883_c1_seq1_m.61140	0.687633	0.617339	0.032791	0.0274258	0.109716	0.05	317	197	514
comp2279445_c0_seq1_m.91120	0.551325	0.541727	0.0214418	0.0397462	0.0823314	0.0950413	279	235	514
comp2239022_c0_seq1_m.28102	-0.480359	-0.49419	0.0133856	0.0506598	0.0593427	0.109091	240	276	516
comp2270279_c0_seq7_m.68904	-0.523546	-0.548778	0.0201441	0.0460038	0.0790181	0.0996169	272	245	517
comp2271567_c0_seq1_m.71391	0.452001	0.448622	0.0115582	0.0565883	0.0539384	0.124567	228	293	521
comp2245721_c0_seq1_m.33844	-0.55925	-0.594622	0.0226253	0.0390047	0.0848763	0.0970464	282	240	522
comp2262887_c0_seq1_m.56477	0.422504	0.420018	0.010758	0.0643609	0.0522043	0.140065	215	307	522
comp2267011_c0_seq2_m.63019	0.451579	0.446219	0.0123641	0.0579239	0.0564607	0.123288	233	290	523
comp2269220_c0_seq10_m.67031	0.711331	0.667239	0.038576	0.026141	0.120366	0.0416667	341	189	530
comp2265255_c2_seq1_m.60100	0.413476	0.413486	0.0107733	0.0670197	0.0522043	0.147436	218	312	530
comp2245511_c0_seq1_m.33658	-0.560541	-0.573944	0.024936	0.039656	0.0895023	0.0954357	296	236	532
comp2265386_c0_seq2_m.60299	0.48136	0.46616	0.0165224	0.0522603	0.0694855	0.109929	253	279	532
comp2273599_c0_seq7_m.75677	0.47025	0.466819	0.0155912	0.0549201	0.0668912	0.118467	248	284	532
comp2259230_c0_seq1_m.50704	-0.585637	-0.631977	0.0287906	0.0371241	0.0988168	0.0905172	310	224	534
comp2271675_c0_seq2_m.71655	0.482656	0.484546	0.0246773	0.0384483	0.0893084	0.0974576	294	241	535
gnl_Pdu_trscr_assembly_1_19681_m.92605	0.535916	0.508062	0.0222907	0.0442171	0.0844033	0.102362	281	255	536
comp1194343_c0_seq1_m.800	0.536622	0.536645	0.0186	0.0416316	0.0746809	0.105691	265	271	536
comp2256041_c0_seq1_m.46046	0.508809	0.495682	0.0211088	0.0490019	0.081376	0.103704	276	263	539
comp2276440_c0_seq2_m.82383	0.437733	0.432469	0.0125686	0.062312	0.0571243	0.139535	234	305	539
comp2266171_c0_seq1_m.61557	0.456377	0.458346	0.0150937	0.0587011	0.0650192	0.129252	247	294	541
comp2243632_c0_seq1_m.31907	-0.404475	-0.400076	0.0113399	0.0713167	0.0538645	0.155963	224	317	541
comp2278333_c0_seq10_m.88591	-0.588937	-0.60566	0.0296722	0.0329699	0.10119	0.0938967	312	232	544
comp2276871_c0_seq8_m.83582	0.495403	0.475574	0.0187864	0.0505695	0.0749383	0.109489	267	277	544
comp2271909_c0_seq2_m.72111	0.400142	0.396173	0.0112089	0.0726438	0.0537221	0.157576	222	323	545
comp2265703_c0_seq1_m.60844	-0.512475	-0.534742	0.0225028	0.0489117	0.0848763	0.104089	283	265	548
comp2276314_c0_seq1_m.82075	0.524825	0.498566	0.0252673	0.0477237	0.0895023	0.101887	301	252	553
comp2262927_c0_seq2_m.56544	0.479546	0.461198	0.0189375	0.0547331	0.0751845	0.118881	268	285	553
comp2241424_c0_seq3_m.29932	0.530744	0.54241	0.0250955	0.0464737	0.0895023	0.103053	295	259	554
comp2266439_c0_seq1_m.62025	0.417211	0.412052	0.0128707	0.0684812	0.0575397	0.155556	238	316	554
comp2272087_c2_seq11_m.72459	0.543241	0.525054	0.0264664	0.0446974	0.092027	0.101562	306	251	557
comp2265462_c0_seq5_m.60462	-0.45499	-0.445076	0.0175521	0.0608806	0.0718288	0.133333	260	297	557
comp2262843_c0_seq2_m.56395	0.45824	0.449789	0.0173067	0.0597284	0.0712006	0.13468	258	300	558
comp2139380_c0_seq1_m.6935	0.425071	0.41602	0.014584	0.0676053	0.0635957	0.153355	244	314	558
comp2261334_c1_seq1_m.54085	-0.765028	-0.826947	0.0472151	0.024812	0.136143	0.0430108	367	195	562
comp2277605_c1_seq7_m.85828	0.45798	0.454799	0.0182352	0.0602754	0.0734933	0.133779	264	298	562
comp2205419_c0_seq2_m.13843	-0.47454	-0.484026	0.0202001	0.0567838	0.0790181	0.124138	271	292	563
comp2263346_c1_seq31_m.57192	-0.428754	-0.437874	0.0163247	0.0678026	0.0689265	0.152866	251	313	564
comp1896477_c0_seq1_m.2604	-0.482278	-0.478987	0.027446	0.0427744	0.0948136	0.104	308	264	572
comp2269374_c0_seq3_m.67298	0.424986	0.415032	0.0169951	0.0701992	0.0703942	0.157895	256	325	581
comp2257674_c0_seq1_m.48339	0.501558	0.473024	0.0254733	0.0520733	0.0895647	0.11032	302	280	582
comp2266680_c0_seq1_m.62479	-0.506135	-0.521742	0.0253197	0.0514088	0.0895023	0.111111	300	282	582
comp2265494_c0_seq1_m.60519	0.496931	0.502706	0.0249222	0.0532331	0.0895023	0.116608	299	283	582
comp2278470_c0_seq2_m.89275	0.391211	0.396025	0.0160722	0.0826945	0.0684966	0.187135	249	340	589
comp2275295_c1_seq2_m.79482	0.64167	0.609984	0.0509302	0.0357227	0.142981	0.0877193	379	215	594
comp2269326_c0_seq2_m.67220	-0.408096	-0.41688	0.0173317	0.0772011	0.0712006	0.169643	259	335	594
comp2275759_c0_seq17_m.80560	-0.358156	-0.359238	0.0135633	0.0929831	0.0598811	0.207865	241	354	595
comp2252790_c0_seq1_m.41691	0.921838	0.727298	0.0837398	0.020094	0.197998	0.0314465	450	150	600
comp2278623_c0_seq6_m.90693	0.437334	0.430094	0.0215151	0.0689727	0.0823314	0.157729	278	324	602
comp2268798_c0_seq2_m.66233	0.428376	0.425417	0.0215888	0.072468	0.0823314	0.158055	277	326	603
comp2258601_c0_seq1_m.49627	0.384627	0.379398	0.0178837	0.0878788	0.0726271	0.197708	261	346	607
comp2262465_c0_seq5_m.55795	0.613466	0.642665	0.047488	0.0382603	0.13656	0.0978723	370	242	612
comp2251386_c0_seq2_m.40044	-0.400871	-0.39408	0.0204371	0.08289	0.0793615	0.186589	273	339	612
comp2248291_c0_seq1_m.36455	-0.3502	-0.350898	0.0168162	0.102702	0.0703942	0.233244	254	371	625
comp2273647_c0_seq2_m.75785	0.362008	0.358486	0.0178644	0.0985874	0.0726271	0.228261	262	367	629
comp2258806_c0_seq1_m.49958	0.412664	0.415934	0.0250025	0.0811588	0.0895023	0.186391	297	338	635
comp2263896_c0_seq3_m.58065	-0.431535	-0.44343	0.0270298	0.0748562	0.0936797	0.162651	307	332	639
comp2269848_c0_seq4_m.68115	0.812516	0.619627	0.0834958	0.0266767	0.197861	0.0459184	449	196	645
gnl_Pdu_trscr_assembly_1_14069_m.67140	-0.334666	-0.335451	0.0179601	0.110854	0.0726598	0.236364	263	383	646
comp2263822_c0_seq1_m.57945	0.343628	0.343273	0.0168843	0.105516	0.0703942	0.237467	255	393	648
comp2254418_c0_seq1_m.43945	-0.382759	-0.382147	0.0241592	0.0950432	0.0886584	0.218232	288	363	651
comp2267691_c0_seq1_m.64257	-0.343037	-0.345278	0.018805	0.10879	0.0749383	0.237598	266	395	661
comp2277815_c0_seq5_m.86532	0.401172	0.386775	0.0290242	0.0898308	0.0992984	0.201705	311	351	662
comp2274643_c0_seq2_m.78058	0.338671	0.341037	0.022655	0.11681	0.0848763	0.236181	284	380	664
comp2269698_c0_seq1_m.67864	0.354089	0.348504	0.0241644	0.109527	0.0886584	0.236979	289	389	678
comp2266801_c0_seq2_m.62707	-0.330401	-0.3304	0.022158	0.11924	0.0842004	0.238213	280	400	680
comp2278054_c0_seq40_m.87392	0.34316	0.339701	0.0232966	0.115195	0.0869739	0.238579	285	401	686
comp2271916_c0_seq1_m.72122	0.346062	0.340814	0.0255057	0.115848	0.0895647	0.237374	303	392	695
comp2278587_c0_seq14_m.90327	0.32819	0.325745	0.0234357	0.122345	0.0871875	0.245098	286	410	696
comp2275857_c0_seq4_m.80829	0.328837	0.326075	0.0240074	0.123011	0.0886584	0.243902	290	407	697
comp2279235_c0_seq1_m.91078	-0.31479	-0.316183	0.0235305	0.129916	0.0872349	0.250597	287	425	712
comp2266882_c0_seq1_m.62832	0.314402	0.313292	0.0243694	0.132244	0.0891031	0.250591	291	424	715
comp2278471_c0_seq8_m.89279	0.29851	0.299125	0.0281944	0.14867	0.0970837	0.286682	309	442	751

## Sheet: IM_FRFM vs PM_FRFM_Male
	limma.logFC	rots.logFC	limma.pvalue	rots.pvalue	limma.adj.pvalue	rots.adj.pvalue	limma.rank	rots.rank	rank.sum
comp2272437_c1_seq1_m.73204	-2.26139	-2.30657	5.12e-06	9.02256e-05	0.00465127	0	1	1	2
comp2274909_c0_seq7_m.78613	1.57404	1.59224	1.31e-05	0.000451128	0.00465127	0	2	2	4
gnl_Pdu_trscr_assembly_1_200732_m.91056	-1.59662	-1.61467	1.16e-05	0.000360902	0.00465127	0	3	3	6
comp2271737_c1_seq2_m.71770	-1.92805	-1.89762	1.86e-05	0.000180451	0.00495693	0	4	4	8
comp2272691_c0_seq4_m.73750	1.16311	1.16511	2.35e-05	0.00117951	0.00500353	0	5	5	10
comp2275893_c0_seq1_m.80933	-1.45977	-1.44646	3.95e-05	0.000631579	0.00700084	0	6	6	12
comp2280591_c0_seq1_m.91233	1.03615	1.03764	5.26e-05	0.00163064	0.00800239	0	7	7	14
comp2257070_c0_seq2_m.47512	1.09953	1.09584	9.71e-05	0.00154041	0.0119599	0	8	8	16
comp2269185_c0_seq2_m.66963	-1.20779	-1.22454	0.000124189	0.00126974	0.0119599	0	9	9	18
comp2274909_c0_seq7_m.78615	1.41125	1.44785	0.00013112	0.00081203	0.0119599	0	10	10	20
gnl_Pdu_trscr_assembly_1_15590_m.29311	1.48892	1.52164	0.000125769	0.000721805	0.0119599	0	12	11	23
comp2208474_c0_seq1_m.14351	-1.20708	-1.1983	0.000168218	0.00135996	0.013768	0	13	12	25
comp2237468_c0_seq1_m.27022	-1.78552	-1.74923	0.000184153	0.000270677	0.0139957	0	14	13	27
comp2232909_c0_seq1_m.24034	1.72532	1.79234	0.000199547	0.000541353	0.0141545	0	15	14	29
comp2189372_c0_seq1_m.11219	-1.29987	-1.29446	0.000248707	0.00108929	0.016539	0	16	15	31
comp2254346_c0_seq1_m.43876	1.02043	1.02499	0.000266051	0.00235714	0.0166517	0	17	16	33
comp2264888_c0_seq4_m.59493	1.0934	1.08987	0.000283787	0.00189662	0.016775	0	18	17	35
comp2274137_c1_seq25_m.76929	-1.23245	-1.24071	0.00058253	0.00145019	0.0247925	0	25	18	43
comp2271419_c1_seq1_m.71009	0.827443	0.823011	0.000501988	0.00476316	0.0240788	0.025641	22	23	45
comp2278010_c1_seq9_m.87231	-0.891165	-0.891575	0.000134886	0.00280639	0.0119599	0.0384615	11	36	47
comp2247098_c0_seq1_m.35275	1.14719	1.1027	0.000833356	0.00180639	0.0305755	0	29	19	48
comp2263787_c0_seq3_m.57874	0.869148	0.860877	0.000579578	0.00402726	0.0247925	0.0285714	24	27	51
comp2273926_c0_seq5_m.76421	0.969101	0.984013	0.000388876	0.00271617	0.0206882	0.04	20	37	57
comp2223962_c0_seq7_m.19686	-0.922982	-0.908178	0.000783048	0.00354229	0.0305755	0.03125	28	30	58
comp2268473_c1_seq1_m.65668	1.00512	0.998822	0.000300089	0.00253571	0.016805	0.0434783	19	39	58
comp1194290_c0_seq1_m.781	-1.48278	-1.39642	0.00194332	0.000902256	0.0530122	0	39	20	59
comp2275391_c0_seq1_m.79711	-0.975923	-0.988737	0.000444324	0.00262594	0.0225124	0.0416667	21	38	59
comp2267571_c0_seq4_m.64058	-0.899715	-0.926144	0.00159383	0.00467293	0.0471066	0.0263158	36	24	60
gnl_Pdu_trscr_assembly_1_7327_m.81715	-0.954684	-0.982301	0.00113685	0.00336184	0.0378004	0.0333333	32	32	64
gnl_Pdu_trscr_assembly_1_3048_m.12984	0.938655	0.911336	0.00167277	0.00363252	0.0481034	0.030303	37	29	66
comp2245014_c0_seq2_m.33157	-0.951867	-0.950996	0.00157337	0.00345207	0.0471066	0.0322581	35	31	66
comp2262465_c0_seq5_m.55795	0.920517	0.918446	0.00228359	0.00420489	0.0548044	0.0277778	44	26	70
gnl_Pdu_trscr_assembly_1_200732_m.91055	-1.00696	-1.0344	0.00181938	0.00289662	0.0509427	0.037037	38	35	73
comp2222959_c0_seq1_m.19328	-0.751844	-0.7464	0.000809513	0.00907331	0.0305755	0.0909091	27	52	79
comp2270385_c0_seq11_m.69105	1.13434	1.1293	0.00431362	0.00226692	0.0772523	0	61	21	82
gnl_Pdu_trscr_assembly_1_12794_m.61443	0.749652	0.750972	0.000520501	0.0080141	0.0240788	0.1	23	60	83
comp2270845_c1_seq1_m.69967	0.833592	0.814662	0.00147456	0.0064765	0.0461452	0.0888889	34	50	84
comp2276668_c0_seq1_m.83017	-0.75803	-0.762508	0.000868891	0.00898308	0.0308167	0.0925926	30	54	84
comp2264838_c0_seq3_m.59436	-1.02181	-1.00598	0.00334673	0.00307425	0.065249	0.0357143	54	34	88
comp2257585_c0_seq1_m.48216	0.779111	0.777474	0.000718914	0.00753383	0.0294202	0.104167	26	62	88
comp2241424_c0_seq3_m.29932	0.771381	0.771573	0.00211522	0.00991447	0.0535856	0.0862069	42	47	89
comp2242933_c0_seq1_m.31351	-0.870613	-0.892931	0.00272984	0.00609305	0.0589513	0.0697674	49	41	90
comp1196959_c0_seq2_m.1014	0.736209	0.727727	0.00126282	0.0105883	0.0407165	0.0983607	33	59	92
comp2277374_c0_seq2_m.85051	0.787881	0.796507	0.000973049	0.0077218	0.0333975	0.102041	31	61	92
comp2275674_c1_seq1_m.80370	-0.790091	-0.816516	0.00299947	0.00944831	0.0602157	0.0877193	53	49	102
comp2263921_c0_seq2_m.58101	0.805123	0.806292	0.00481728	0.00543609	0.0794888	0.05	65	40	105
comp2242407_c0_seq1_m.30845	0.815342	0.822277	0.00269426	0.00820959	0.0589513	0.0980392	48	58	106
comp2269321_c1_seq1_m.67212	-0.813772	-0.795124	0.00337284	0.00869549	0.065249	0.0961538	55	56	111
comp2201786_c0_seq1_m.13247	0.682243	0.67198	0.00231786	0.0153882	0.0548044	0.142857	43	68	111
comp2265049_c0_seq3_m.59764	0.902485	0.856874	0.00543118	0.00600282	0.080935	0.0714286	70	42	112
comp2275714_c2_seq1_m.80469	-0.816066	-0.780189	0.00453885	0.00935808	0.0772523	0.0892857	63	51	114
comp2252746_c0_seq1_m.41651	-0.715259	-0.702831	0.002578	0.0134342	0.0583614	0.147059	46	70	116
gnl_Pdu_trscr_assembly_1_7274_m.39240	0.664739	0.657634	0.00199294	0.0163506	0.0530122	0.162162	40	76	116
comp2272435_c0_seq2_m.73201	0.788724	0.789691	0.005705	0.00676222	0.080935	0.0869565	71	48	119
comp2280694_c0_seq1_m.91236	0.803952	0.759875	0.00556913	0.01011	0.080935	0.0847458	75	45	120
comp2268869_c0_seq6_m.66344	0.76664	0.781132	0.0045379	0.0116212	0.0772523	0.126984	60	65	125
comp2273900_c0_seq1_m.76336	-0.741799	-0.764048	0.00438017	0.0129549	0.0772523	0.136364	62	66	128
comp2279748_c0_seq1_m.91174	-0.613752	-0.612378	0.00205439	0.0204239	0.0533139	0.183908	41	87	128
comp2273765_c1_seq6_m.76032	0.693443	0.682077	0.00382593	0.0158778	0.0726928	0.152778	56	73	129
comp2275853_c0_seq1_m.80817	0.625311	0.628286	0.00224393	0.0198675	0.0548044	0.178571	45	84	129
comp2280536_c0_seq1_m.91231	-0.824112	-0.835501	0.00720387	0.00705733	0.0912782	0.0851064	84	46	130
comp2271594_c0_seq8_m.71451	-0.653229	-0.643817	0.00254311	0.0183524	0.0583614	0.177215	47	83	130
comp2266701_c0_seq3_m.62512	1.08135	1.07621	0.0104196	0.00316447	0.110052	0.0344828	98	33	131
comp1910314_c0_seq1_m.2848	-0.813738	-0.840425	0.00790856	0.0103055	0.0923152	0.0833333	88	44	132
comp2261379_c0_seq1_m.54133	0.841087	0.865184	0.00661549	0.00878571	0.0875637	0.0943396	80	55	135
comp2268978_c0_seq1_m.66540	0.605731	0.605063	0.00284664	0.0228731	0.0589513	0.189474	50	88	138
comp2250550_c1_seq1_m.39064	0.768604	0.783686	0.00624261	0.0120959	0.0851556	0.123077	76	63	139
comp2257070_c0_seq2_m.47513	0.769134	0.810947	0.00615783	0.0120056	0.0851556	0.125	77	64	141
comp2268937_c0_seq1_m.66472	0.619837	0.627836	0.00400037	0.0227829	0.0733861	0.191489	58	90	148
comp2278276_c0_seq16_m.88350	0.56548	0.563342	0.00505387	0.0310564	0.0794888	0.195122	67	95	162
comp2270876_c0_seq2_m.70018	-0.718837	-0.7586	0.00873376	0.016172	0.0978181	0.150685	95	72	167
comp2277416_c0_seq3_m.85174	0.651633	0.663005	0.00617739	0.0213496	0.0851556	0.191011	78	89	167
comp2274238_c3_seq9_m.77182	0.593477	0.590417	0.00288108	0.0244352	0.0589513	0.204082	51	116	167
comp2254641_c1_seq1_m.44200	-0.558468	-0.560779	0.00500748	0.0320846	0.0794888	0.2	64	105	169
comp2252506_c0_seq1_m.41372	0.969046	0.845248	0.0161734	0.00581579	0.131363	0.0731707	131	43	174
comp2232805_c0_seq1_m.23974	0.581719	0.587492	0.00457415	0.0274389	0.0772523	0.203704	59	115	174
comp2276377_c0_seq2_m.82218	-0.563417	-0.562761	0.00282482	0.0259925	0.0589513	0.215686	52	127	179
comp2257905_c0_seq1_m.48664	-0.634612	-0.639819	0.00686575	0.0231447	0.0890873	0.197917	82	100	182
comp2278405_c0_seq22_m.88893	0.584054	0.584643	0.00391506	0.0260827	0.0730812	0.213592	57	126	183
comp2277729_c0_seq10_m.86207	0.582198	0.573706	0.00498954	0.0281062	0.0794888	0.209091	66	122	188
comp2265328_c0_seq2_m.60206	-0.970076	-1.06263	0.0187561	0.00628102	0.141535	0.0909091	139	53	192
comp2278238_c0_seq6_m.88188	0.587827	0.578748	0.00520167	0.0270705	0.0802113	0.209524	69	123	192
comp2274295_c0_seq2_m.77311	0.58968	0.597494	0.00552528	0.0272585	0.080935	0.207547	72	121	193
comp2278509_c0_seq8_m.89637	0.54617	0.543538	0.00508011	0.0345	0.0794888	0.221374	68	128	196
comp2272882_c0_seq14_m.74184	-0.629361	-0.648567	0.0080908	0.0248055	0.0923152	0.20202	91	113	204
comp2278480_c0_seq4_m.89330	0.550196	0.549787	0.00551181	0.0341165	0.080935	0.224806	73	135	208
comp2138952_c0_seq1_m.6867	0.605889	0.605352	0.00730722	0.0262603	0.0914692	0.211538	85	124	209
comp1965369_c0_seq1_contamination_m.3664	-1.4678	-1.14753	0.0327829	0.00207895	0.180493	0	191	22	213
comp2225664_c0_seq1_m.20382	0.559726	0.559125	0.00720618	0.0343045	0.0912782	0.223077	83	132	215
comp2273778_c1_seq23_m.76059	0.551909	0.550166	0.00647367	0.0351842	0.0871897	0.227273	79	141	220
comp2266473_c1_seq14_m.62086	-1.11941	-1.12393	0.0344079	0.00393703	0.18305	0.0294118	200	28	228
comp2278480_c1_seq1_m.89333	0.509945	0.508287	0.00563948	0.0429596	0.080935	0.246667	74	159	233
comp2278630_c0_seq8_m.90809	-0.513177	-0.517173	0.00811625	0.0461504	0.0923152	0.234568	94	144	238
comp2268906_c0_seq4_m.66401	0.509807	0.510892	0.00666604	0.0450348	0.0875637	0.245161	81	157	238
comp2275933_c0_seq1_m.81045	0.503077	0.504638	0.00769585	0.0476955	0.0923152	0.240964	92	149	241
comp2265656_c0_seq3_m.60780	0.517398	0.517767	0.00777339	0.0449445	0.0923152	0.246753	89	160	249
comp2263073_c0_seq1_m.56786	-0.524599	-0.524777	0.00752025	0.0428694	0.0919718	0.248322	87	162	249
comp2273038_c0_seq3_m.74522	0.526555	0.52209	0.00742746	0.0421034	0.0918932	0.253425	86	167	253
comp2270228_c0_seq1_m.68797	0.494494	0.496458	0.00815567	0.0512782	0.0923152	0.267442	90	170	260
comp2278605_c1_seq8_m.90480	0.470296	0.471019	0.00794653	0.0558609	0.0923152	0.282609	93	184	277
comp2347711_c0_seq1_contamination_m.91628	-0.917227	-1.07696	0.0486206	0.0107838	0.215551	0.0967742	240	57	297
comp2269324_c0_seq1_m.67217	-1.21769	-1.33408	0.0711072	0.00429511	0.260684	0.027027	289	25	314

## Sheet: PM_NM_Female vs PM_NM_Male
	limma.logFC	rots.logFC	limma.pvalue	rots.pvalue	limma.adj.pvalue	rots.adj.pvalue	limma.rank	rots.rank	rank.sum
comp2265386_c0_seq2_m.60299	-0.194553	-0.194291	0.00219052	0.00107519	0.2148	0	4	1	5
comp2347711_c0_seq1_contamination_m.91628	-0.318134	-0.317315	0.00034042	0.000781955	0.2148	0	9	2	11
gnl_Pdu_trscr_assembly_1_20144_m.60515	0.194112	0.193911	0.00200501	0.000691729	0.2148	0	10	3	13
gnl_Pdu_trscr_assembly_1_5614_m.48467	0.182264	0.182264	0.00206952	0.00018797	0.2148	0	11	4	15
gnl_Pdu_trscr_assembly_1_18157_m.24773	-0.173991	-0.174198	0.00352937	0.0013703	0.25035	0	15	5	20

## Sheet: M_NM_Female vs M_NM_Male
	limma.logFC	rots.logFC	limma.pvalue	rots.pvalue	limma.adj.pvalue	rots.adj.pvalue	limma.rank	rots.rank	rank.sum
comp2263011_c0_seq1_m.56689	0.63425	-0.633731	9.64e-06	0.000270677	0.00518604	0	1	1	2
gnl_Pdu_trscr_assembly_1_91632_m.21453	0.684268	-0.684151	9.75e-06	0.000180451	0.00518604	0	2	2	4
comp2232805_c0_seq1_m.23974	-0.674089	0.675205	1.68e-05	0.000360902	0.00596206	0	3	3	6
comp2232909_c0_seq1_m.24034	-1.26832	1.28191	3.51e-05	9.02256e-05	0.00932372	0	4	4	8
comp2254675_c0_seq1_m.44244	0.4404	-0.441575	0.00032714	0.00118233	0.0696153	0	5	5	10
comp2274537_c0_seq28_m.77857	-0.598569	0.597275	0.000461816	0.000644737	0.0818954	0	6	6	12
comp1785956_c0_seq1_m.2259	0.617262	-0.619458	0.000860027	0.00109211	0.107358	0	7	7	14
comp2260058_c0_seq1_m.51934	0.639989	-0.640214	0.000908104	0.00100188	0.107358	0	8	8	16
comp2239022_c0_seq1_m.28102	-0.871104	0.888825	0.00132511	0.000734962	0.12719	0	11	9	20
comp2277972_c0_seq17_m.87106	-0.315544	0.315471	0.00116309	0.00447932	0.123753	0.0833333	10	11	21
comp2272087_c1_seq4_m.72458	0.267847	-0.267672	0.000846848	0.00307331	0.107358	0.0909091	9	12	21
comp2277282_c0_seq11_m.84762	-0.568973	0.56476	0.00143447	0.00175658	0.12719	0	12	10	22

[truncated: 4 more sheets: PM_FRFM_Female vs PM_FRFM_Male, IM_FRFM vs IM_NM, PM_FRFM_Female vs PM_NM_Female, PM_FRFM_Male vs PM_NM_Male]
