# Supplementary material for: Combined transcriptome and proteome profiling reveals specific molecular brain signatures for sex, maturation and circalunar clock phase
Source: eLife. 2019 Feb 15;8:e41556. doi: 10.7554/eLife.41556 (PMC6377233; doi:10.7554/eLife.41556)
Supplement: Figure 5—source data 9. — This file contains the soft clustering output of protein expression values with Mfuzz. Each comparison, maturation, sex, and lunar contains the individual transcript ID and the membership values for each cluster ranging from 0 to 1. [file elife-41556-fig5-data9.xlsx]

## Sheet: allMaturation
	cluster	membership.1	membership.2	membership.3	membership.4	membership.5
comp2257674_c0_seq1_m.48339	4	0.00366494	0.00218519	0.0159651	0.965676	0.0125085
comp2262317_c0_seq2_m.55577	2	0.0115918	0.889918	0.0817089	0.00947564	0.00730585
comp1888169_c0_seq2_m.2479	3	0.0259566	0.219415	0.658673	0.0690224	0.026933
gnl_Pdu_trscr_assembly_1_11607_m.26425	4	0.0198984	0.0117822	0.0622847	0.858714	0.0473208
comp2274096_c1_seq4_m.76855	4	0.0596264	0.0376477	0.156919	0.665301	0.0805062
comp2271419_c1_seq1_m.71009	4	0.00488779	0.00862802	0.475743	0.489227	0.0215146
comp2262185_c0_seq1_m.55318	4	0.00429444	0.00420507	0.0588594	0.919691	0.0129496
comp2275523_c0_seq29_m.80039	3	0.00313278	0.0064167	0.732006	0.248503	0.00994128
comp2263115_c0_seq2_m.56831	4	0.00410704	0.00500234	0.120525	0.857807	0.0125587
comp1961272_c0_seq1_m.3584	3	0.00137545	0.00463373	0.970027	0.020389	0.00357512
comp2261395_c0_seq1_m.54150	4	0.0380544	0.0171121	0.0699835	0.779001	0.0958487
comp2271675_c0_seq2_m.71655	4	0.0172972	0.0121204	0.0714894	0.861128	0.0379652
comp2261150_c0_seq1_m.53829	4	0.195982	0.08035	0.155409	0.436272	0.131986
comp2275933_c0_seq1_m.81045	4	0.000434176	0.000361142	0.00499482	0.991788	0.00242222
comp2271753_c0_seq2_m.71801	4	0.00219324	0.00104513	0.00688303	0.974295	0.0155837
comp2229729_c0_seq1_m.22264	4	0.0019262	0.00230133	0.0635729	0.923868	0.00833125
comp2246119_c0_seq1_m.34306	2	0.0992864	0.411279	0.329652	0.113672	0.0461108
comp2263921_c0_seq2_m.58101	4	0.00925451	0.0135222	0.431276	0.455811	0.0901361
comp2270220_c0_seq1_m.68776	3	0.00745723	0.0843105	0.872811	0.0250968	0.0103245
comp2245053_c0_seq1_m.33185	4	0.00213405	0.00194495	0.033283	0.941176	0.021462
comp2261362_c0_seq2_m.54116	4	0.0100787	0.00617103	0.0435209	0.906739	0.0334903
comp2277951_c0_seq2_m.87004	4	0.0435076	0.014269	0.0454835	0.784196	0.112544
comp2273765_c1_seq6_m.76032	4	0.00325988	0.00281614	0.030645	0.950345	0.0129338
comp2261399_c0_seq2_m.54155	5	0.0106518	0.00363354	0.012731	0.113142	0.859842
comp2263394_c0_seq1_m.57263	3	0.00897241	0.0198594	0.79335	0.126811	0.0510073
comp2275241_c0_seq5_m.79383	4	0.00875094	0.00534011	0.0395152	0.899919	0.0464743
comp2256095_c0_seq1_m.46136	5	0.0053107	0.00194072	0.00520149	0.0193743	0.968173
comp2278054_c0_seq40_m.87392	4	0.00802395	0.00366391	0.0213834	0.71238	0.254549
comp2253077_c0_seq1_m.42045	4	0.0487972	0.0535764	0.263003	0.570129	0.0644951
comp2272435_c0_seq2_m.73201	4	0.00393987	0.00493747	0.105898	0.870523	0.0147019
comp2276166_c0_seq8_m.81705	3	0.00301543	0.0112985	0.941289	0.0377939	0.00660347
comp2260960_c0_seq2_m.53456	3	0.00514497	0.0141878	0.88579	0.0790584	0.0158193
comp2211270_c0_seq1_m.14951	3	0.0209426	0.0407266	0.661579	0.232468	0.0442833
comp2277132_c1_seq1_m.84335	3	0.0163476	0.21004	0.708579	0.0445108	0.0205228
comp2266755_c0_seq1_m.62616	2	0.0476417	0.768293	0.13267	0.0307851	0.0206099
comp2258619_c0_seq2_m.49656	3	0.0233465	0.374246	0.526024	0.0426515	0.0337316
comp2277680_c0_seq25_m.86056	1	0.835605	0.0175236	0.0116885	0.0336202	0.101562
comp2232641_c0_seq7_m.23875	1	0.817341	0.138337	0.0134886	0.0113166	0.0195168
comp2214845_c0_seq1_m.16111	3	0.00495405	0.0549036	0.913979	0.018387	0.00777674
comp2268978_c0_seq1_m.66540	4	0.00029687	0.000272122	0.00544493	0.991867	0.00211934
comp2270905_c1_seq5_m.70069	1	0.899897	0.0595678	0.00949215	0.0101217	0.0209217
comp2245721_c0_seq1_m.33844	2	0.326689	0.581367	0.0401862	0.0251793	0.0265787
comp2273576_c0_seq1_m.75622	1	0.547591	0.0694158	0.0634353	0.188841	0.130717
comp2269611_c0_seq1_m.67728	3	0.00502515	0.0114439	0.804335	0.16647	0.012726
comp2272118_c0_seq11_m.72524	4	0.00470622	0.00431463	0.0484732	0.926347	0.0161591
comp2256252_c0_seq1_m.46348	4	0.00318743	0.00173972	0.0122211	0.962214	0.0206376
comp2278485_c0_seq1_m.89371	4	0.0226108	0.0258979	0.243933	0.661383	0.046175
comp2276750_c0_seq1_m.83194	2	0.0160106	0.75433	0.198676	0.0185694	0.0124139
comp2274413_c0_seq1_m.77564	4	0.0566858	0.0198168	0.0625977	0.761172	0.0997275
comp2257395_c0_seq4_m.47951	4	0.0063264	0.00294372	0.0181515	0.9421	0.0304787
comp2233700_c1_seq1_m.24550	4	0.00199407	0.00110019	0.00850646	0.978804	0.00959551
comp2276461_c0_seq7_m.82444	4	0.156813	0.0256444	0.0495026	0.453748	0.314292
comp2278077_c0_seq3_m.87468	3	0.0199137	0.20747	0.695794	0.057523	0.0192998
comp2247176_c0_seq3_m.35337	2	0.198546	0.715518	0.0340072	0.0164208	0.0355076
comp2265883_c1_seq1_m.61140	3	0.00721059	0.0475703	0.893983	0.040025	0.0112109
comp2277005_c0_seq3_m.83943	1	0.474417	0.37163	0.0613286	0.0474058	0.0452188
comp2266692_c0_seq1_m.62504	3	0.00740702	0.0578372	0.896321	0.027169	0.0112658
comp2276871_c0_seq8_m.83582	2	0.0155414	0.834616	0.124081	0.0149376	0.0108242
comp2270996_c0_seq5_m.70236	4	0.234658	0.161188	0.203831	0.304758	0.0955646
comp2262197_c0_seq1_m.55346	3	0.02655	0.400424	0.497163	0.0389585	0.0369047
comp2269627_c0_seq2_m.67749	4	0.00482356	0.00710484	0.308234	0.657748	0.0220904
comp2275701_c1_seq1_m.80440	4	0.0565393	0.0231818	0.0816102	0.744819	0.0938494
comp2274693_c0_seq1_m.78142	3	0.00370575	0.00668083	0.658542	0.314943	0.0161281
comp2278276_c0_seq16_m.88350	3	0.00390804	0.00833411	0.788859	0.177095	0.0218035
comp2142866_c0_seq1_m.7576	3	0.0338713	0.419242	0.463142	0.0596028	0.0241417
comp2277413_c0_seq4_m.85165	5	0.0234665	0.0196079	0.0801779	0.136439	0.740308
comp2261183_c0_seq1_m.53867	4	0.000508704	0.000426539	0.00647161	0.990175	0.00241826
comp1194322_c0_seq2_m.793	3	0.00394813	0.0111624	0.898371	0.0778859	0.0086323
comp2278161_c0_seq3_m.87805	4	0.0311336	0.0122142	0.0449696	0.81937	0.0923122
comp2252506_c0_seq1_m.41372	3	0.0357677	0.0884634	0.48166	0.137202	0.256907
comp2277815_c1_seq2_m.86535	2	0.00393777	0.984368	0.00847786	0.00168602	0.00153071
comp2250982_c0_seq1_m.39507	3	0.00394772	0.0102566	0.852394	0.11847	0.0149317
comp2276151_c0_seq3_m.81648	4	0.00515088	0.00377951	0.0345421	0.941741	0.0147868
comp2263073_c0_seq1_m.56786	1	0.667513	0.087752	0.0541729	0.101575	0.0889869
comp2275391_c0_seq1_m.79711	1	0.977276	0.0113976	0.00231208	0.00299354	0.006021
comp2259963_c0_seq1_m.51818	4	0.0661112	0.013805	0.0382908	0.53516	0.346633
comp2262465_c0_seq5_m.55795	5	0.013188	0.00689857	0.0342166	0.277077	0.668619
comp2273845_c0_seq2_m.76206	1	0.479581	0.340659	0.0674896	0.0610882	0.0511818
comp1769718_c0_seq1_m.2239	3	0.114666	0.223029	0.357903	0.240064	0.0643384
comp2276031_c0_seq51_m.81296	3	0.0027052	0.00660263	0.910791	0.0704691	0.00943193
comp2221095_c0_seq1_m.18558	4	0.00660974	0.00411312	0.0351165	0.761152	0.193009
comp2276668_c0_seq1_m.83017	1	0.900568	0.0205133	0.0104369	0.0242621	0.0442201
comp2245687_c1_seq1_m.33822	4	0.0356809	0.0470753	0.293422	0.567209	0.0566129
comp2271944_c0_seq11_m.72172	4	0.0599347	0.0274249	0.0846273	0.733889	0.0941242
comp2271594_c0_seq8_m.71451	1	0.850245	0.0998802	0.00970757	0.00794996	0.0322173
comp2232909_c0_seq1_m.24034	3	0.084137	0.181041	0.388538	0.229479	0.116805
comp2274446_c0_seq19_m.77642	5	0.0192849	0.0056255	0.0111068	0.0379964	0.925986
comp2271526_c0_seq3_m.71285	2	0.227219	0.699833	0.0261989	0.0136408	0.033108
comp2276314_c0_seq1_m.82075	3	0.00139327	0.00399913	0.961201	0.029268	0.0041386
comp2259221_c0_seq1_m.50687	3	0.00656905	0.0248066	0.889217	0.0693565	0.0100511
comp2270385_c0_seq11_m.69105	3	0.00367955	0.011347	0.910636	0.05794	0.0163972
comp2275974_c0_seq18_m.81146	4	0.0563565	0.0138316	0.0392158	0.695326	0.19527
comp2266503_c0_seq6_m.62129	5	0.0139393	0.00680358	0.0144495	0.0314211	0.933387
comp2272433_c0_seq1_m.73197	1	0.354442	0.0977471	0.115826	0.304843	0.127142
gnl_Pdu_trscr_assembly_1_7274_m.39240	4	0.00321145	0.00371667	0.0749106	0.906351	0.0118107
comp2287273_c0_seq1_contamination_m.91384	3	0.000264545	0.00104636	0.99377	0.00414718	0.00077197
comp2275698_c0_seq5_m.80432	5	0.365007	0.0190594	0.0187013	0.0674133	0.529819
comp2264121_c0_seq1_m.58459	3	0.0152998	0.145222	0.778504	0.0394161	0.0215585
comp2265494_c0_seq1_m.60519	2	0.0189826	0.783371	0.163289	0.0172967	0.0170606
comp2270228_c0_seq1_m.68797	4	0.0135002	0.0177457	0.340619	0.415872	0.212262
comp2276377_c0_seq2_m.82218	1	0.814308	0.0880362	0.0259319	0.0327152	0.0390083
gnl_Pdu_trscr_assembly_1_20144_m.60515	3	0.0230844	0.127479	0.717874	0.103107	0.0284557
comp2278536_c1_seq38_m.89884	4	0.00554972	0.00223147	0.0122243	0.937412	0.0425824
comp2269793_c0_seq1_m.68039	4	0.00330288	0.00298255	0.039022	0.937718	0.0169741
comp2264022_c0_seq13_m.58310	3	0.00553484	0.0125862	0.817555	0.145159	0.0191651
comp2275167_c0_seq1_m.79227	4	0.00883421	0.0051236	0.038258	0.864205	0.0835791
comp2268340_c1_seq1_m.65478	4	0.0031551	0.00542128	0.474803	0.503917	0.0127038
gnl_Pdu_trscr_assembly_1_1644_m.62862	4	0.294784	0.0354759	0.0520996	0.335574	0.282067
comp2254568_c0_seq1_m.44123	1	0.748831	0.0295064	0.0224523	0.0729952	0.126215
comp1335339_c0_seq2_m.1954	3	0.0212975	0.145063	0.743288	0.0611002	0.0292518
comp2272876_c0_seq2_m.74167	2	0.00724379	0.978748	0.00924599	0.00242873	0.00233305
comp2275616_c0_seq2_m.80253	4	0.0184501	0.00996286	0.0608094	0.631144	0.279633
comp2278238_c0_seq6_m.88188	3	0.00609966	0.0232841	0.882857	0.0731272	0.0146321
comp2261876_c0_seq1_m.54865	4	0.000528617	0.0003376	0.00331577	0.991035	0.00478286
comp2270119_c0_seq15_m.68605	4	0.0358781	0.0126121	0.0460104	0.814572	0.0909278
comp2261121_c0_seq1_m.53764	2	0.0222485	0.961026	0.0093793	0.00355076	0.00379527
comp2245960_c0_seq1_m.34133	4	0.0238528	0.0147215	0.0814599	0.602586	0.27738
comp2276202_c0_seq3_m.81780	3	0.00356476	0.0149613	0.93299	0.0421466	0.00633771
comp1977957_c0_seq1_m.3878	3	0.0103655	0.0174574	0.645091	0.281398	0.0456884
comp2275508_c1_seq3_m.80009	5	0.202747	0.0174988	0.0126063	0.0262383	0.740909
comp2212572_c0_seq1_m.15390	4	0.0856008	0.0483043	0.138525	0.644416	0.083154
comp2263667_c0_seq1_m.57601	2	0.00401027	0.985437	0.00743705	0.001472	0.00164322
comp2277311_c0_seq3_m.84858	4	0.00266267	0.00141176	0.00984224	0.965212	0.0208716
comp2141997_c0_seq1_m.7386	4	0.0015294	0.00164143	0.0480257	0.938695	0.0101088
comp2277313_c0_seq3_m.84866	3	0.0219347	0.108774	0.748806	0.0990064	0.0214783
comp2268473_c1_seq1_m.65668	3	0.0156393	0.23237	0.695157	0.0382499	0.0185839
comp2269023_c0_seq1_m.66650	3	0.0200762	0.0360976	0.552228	0.34541	0.046188
comp2269324_c0_seq1_m.67217	1	0.69889	0.210082	0.0297997	0.0244484	0.0367796
comp2271350_c0_seq18_m.70898	2	0.0246391	0.490322	0.423034	0.0413386	0.0206661
comp2132126_c0_seq4_m.6558	4	0.000898287	0.000784815	0.0109661	0.983308	0.00404298
comp2268942_c0_seq5_m.66483	4	0.0133986	0.0113728	0.110485	0.475908	0.388835
comp2273385_c0_seq1_m.75218	4	0.00421964	0.00528765	0.201348	0.75866	0.0304846
comp2270576_c0_seq1_m.69463	3	0.00162051	0.00709198	0.972631	0.0141839	0.00447229
comp2274259_c0_seq1_m.77220	4	0.00766536	0.00419726	0.0273322	0.930794	0.0300108
comp2234079_c0_seq2_m.24745	3	0.0137387	0.0366711	0.719169	0.209188	0.0212337
comp1953077_c0_seq1_m.3483	1	0.784877	0.0458799	0.0241305	0.0541065	0.0910062
gnl_Pdu_trscr_assembly_1_4228_m.63259	1	0.626578	0.0262982	0.0195679	0.0617907	0.265765
comp2263347_c0_seq2_m.57195	2	0.0248059	0.802093	0.136084	0.0226801	0.0143367
comp2263658_c0_seq3_m.57592	4	0.00878731	0.00344105	0.0175214	0.851027	0.119223
comp2263691_c0_seq2_m.57661	1	0.854014	0.0169985	0.0110287	0.0317388	0.0862197
comp2273628_c0_seq6_m.75728	1	0.429847	0.0261136	0.0243644	0.0940265	0.425649
comp2201786_c0_seq1_m.13247	3	0.00994621	0.120754	0.826851	0.0271059	0.0153429
comp2272437_c1_seq1_m.73204	1	0.911227	0.0383175	0.0112724	0.0160895	0.0230938
comp2252186_c0_seq3_m.40915	2	0.0100793	0.980035	0.00550726	0.0018141	0.00256479
comp2276719_c0_seq5_m.83124	2	0.010621	0.982343	0.00349754	0.00126631	0.00227175
comp2267172_c0_seq1_m.63318	4	0.0185385	0.0168941	0.135574	0.795165	0.033829
comp2276743_c1_seq1_m.83170	4	0.0828522	0.0783477	0.254244	0.511639	0.072917
comp2267718_c0_seq1_m.64309	3	0.0294231	0.0677084	0.619256	0.141833	0.14178
comp2266233_c0_seq1_m.61658	3	0.0199599	0.0357052	0.609052	0.294525	0.0407582
comp2253856_c0_seq1_m.43254	1	0.880553	0.0734243	0.00955173	0.00927632	0.0271947
comp2204672_c0_seq1_m.13711	1	0.782781	0.0229699	0.0108213	0.0179909	0.165437
comp2273599_c0_seq7_m.75677	4	0.00142126	0.000796855	0.0061552	0.980068	0.0115591
comp2271667_c0_seq1_m.71637	4	0.0400587	0.0415493	0.314178	0.518303	0.0859111
comp2272961_c0_seq1_m.74370	2	0.015098	0.887928	0.0771487	0.0118414	0.00798407
comp2277142_c0_seq6_m.84365	4	0.00932367	0.0127766	0.383953	0.487879	0.106067
comp2276743_c0_seq1_m.83169	3	0.00567688	0.0319838	0.913416	0.0397176	0.00920596
comp2269848_c0_seq4_m.68115	5	0.0223883	0.0268909	0.212411	0.239091	0.499218
comp2265656_c0_seq3_m.60780	4	0.00214437	0.00176235	0.0262652	0.949514	0.0203142
comp2242407_c0_seq1_m.30845	3	0.0186556	0.0260576	0.399835	0.326216	0.229235
comp2265049_c0_seq3_m.59764	3	0.00451393	0.0099396	0.751544	0.218994	0.015008
comp2269773_c0_seq6_m.68002	4	0.139915	0.0718026	0.14526	0.53331	0.109712
comp2271535_c0_seq1_m.71319	4	0.0584861	0.0688647	0.271925	0.528399	0.0723246
comp2276498_c2_seq1_m.82546	5	0.393075	0.0237799	0.0235282	0.0779031	0.481714
comp2263787_c0_seq3_m.57874	3	0.0112074	0.0799743	0.837708	0.0436928	0.0274176
comp2264621_c0_seq1_m.59138	1	0.864748	0.0125339	0.0065009	0.014068	0.102149
comp2266714_c1_seq1_m.62532	1	0.512288	0.339559	0.0559223	0.0485764	0.0436535
comp2266500_c0_seq1_m.62123	1	0.330504	0.280397	0.0623093	0.0429925	0.283797
comp2253217_c0_seq2_m.42336	2	0.284346	0.519639	0.05394	0.0310105	0.111065
comp2276035_c1_seq16_m.81307	1	0.979412	0.00452715	0.00159407	0.00284042	0.0116265
comp2262281_c0_seq3_m.55504	4	0.0045467	0.00222979	0.0138889	0.925589	0.0537459
gnl_Pdu_trscr_assembly_1_14069_m.67140	2	0.0437244	0.938239	0.00782084	0.00331818	0.00689732
comp2279748_c0_seq1_m.91174	1	0.706697	0.193748	0.0328155	0.0297446	0.0369948
comp2273142_c0_seq1_m.74744	2	0.393442	0.515211	0.0262123	0.0151641	0.0499705
comp2274537_c0_seq28_m.77857	1	0.439644	0.0835355	0.0745672	0.199295	0.202958
comp2263277_c0_seq1_m.57091	4	0.292521	0.0346276	0.0503896	0.326456	0.296006
comp2277982_c0_seq2_m.87136	4	0.00497539	0.00646426	0.139506	0.829616	0.019438
comp2271906_c0_seq1_m.72107	4	0.050674	0.0325941	0.164409	0.634066	0.118257
comp2271257_c1_seq1_m.70699	4	0.236312	0.033621	0.0574453	0.403578	0.269043
comp2241992_c0_seq1_m.30524	2	0.0362387	0.776347	0.141295	0.0290597	0.0170593
comp2271871_c0_seq8_m.72023	3	0.00666322	0.0172205	0.817853	0.145567	0.012696
comp2222959_c0_seq1_m.19328	1	0.500254	0.431616	0.0221689	0.0145415	0.0314201
comp2265885_c0_seq3_m.61143	4	0.0225777	0.0097869	0.0478372	0.750989	0.168809
comp2004487_c0_seq1_m.4269	2	0.00784699	0.976523	0.0104791	0.00241603	0.00273494
comp2258806_c0_seq1_m.49958	3	0.000745116	0.00398236	0.987076	0.00644121	0.00175503
comp1194106_c0_seq1_m.742	3	0.0019117	0.0137694	0.968953	0.0114946	0.00387134
comp2277617_c1_seq7_m.85877	1	0.964245	0.010194	0.0032749	0.00561887	0.0166676
comp2264888_c0_seq4_m.59493	3	0.00230115	0.0068082	0.925921	0.057392	0.00757722
comp2260997_c1_seq7_m.53574	1	0.753382	0.137634	0.0322325	0.0374551	0.0392962
comp2273900_c0_seq1_m.76336	1	0.831853	0.0608337	0.0237057	0.0393408	0.0442673
comp2269814_c0_seq1_m.68069	4	0.0039785	0.0064829	0.336104	0.637905	0.0155294
comp2270404_c0_seq3_m.69137	1	0.966527	0.0173768	0.00244276	0.00248323	0.0111702
comp2277337_c0_seq4_m.84929	3	0.0572055	0.129317	0.451634	0.294885	0.0669583
gnl_Pdu_trscr_assembly_1_3867_m.65412	4	0.00281654	0.00185941	0.0150888	0.968583	0.0116524
comp2278470_c0_seq2_m.89275	4	0.000944536	0.000593192	0.00529825	0.98789	0.00527408
comp2263612_c1_seq1_m.57550	1	0.931239	0.00897124	0.00463016	0.0103446	0.0448149
comp2277815_c0_seq5_m.86532	2	0.0137469	0.907967	0.0607763	0.0100051	0.00750449
comp2248254_c1_seq2_m.36433	3	0.0165346	0.195454	0.726831	0.0441461	0.0170345
comp2276160_c0_seq4_m.81678	2	0.277235	0.533426	0.0521433	0.0281992	0.108996
comp2279340_c0_seq1_m.91103	4	0.00296091	0.00286414	0.0622795	0.903257	0.0286383
gnl_Pdu_trscr_assembly_1_17807_m.62055	3	0.01349	0.128966	0.796173	0.0353896	0.0259812
comp2258349_c0_seq1_m.49321	1	0.788729	0.0313068	0.0219564	0.0635117	0.0944959
comp2269698_c0_seq1_m.67864	4	0.0031798	0.00299068	0.0587224	0.898422	0.0366852
comp2138816_c0_seq1_m.6842	5	0.103323	0.0458551	0.0923753	0.160959	0.597488
comp2258554_c1_seq2_m.49570	5	0.00742463	0.00262314	0.0102516	0.121782	0.857919
comp2275495_c0_seq1_m.79975	2	0.0242427	0.959054	0.00829462	0.00309726	0.00531152
comp2276804_c0_seq1_m.83376	1	0.814491	0.146008	0.0104916	0.00875113	0.0202585
comp2238188_c0_seq1_m.27576	2	0.270961	0.685309	0.0158658	0.00923244	0.0186314
comp1194362_c0_seq2_m.804	2	0.00719027	0.975373	0.0122627	0.00274389	0.00243048
comp2276783_c0_seq3_m.92635	5	0.0311904	0.0321636	0.247057	0.310815	0.378774
comp2271124_c0_seq1_m.70454	2	0.0498862	0.636156	0.235602	0.0495618	0.0287933
comp2256220_c0_seq1_m.46316	5	0.00923956	0.00244445	0.00711283	0.069439	0.911764
comp2252847_c0_seq1_m.41763	3	0.000977593	0.00617758	0.983472	0.00732743	0.00204544
comp1199432_c0_seq1_m.1095	1	0.564902	0.334632	0.0236996	0.0166704	0.0600968
comp2234282_c0_seq1_m.24908	2	0.00417997	0.976902	0.0146165	0.00231662	0.00198539
comp2203251_c0_seq1_m.13504	4	0.0006153	0.000534589	0.00953908	0.985809	0.0035016
gnl_Pdu_trscr_assembly_1_1514_m.69841	4	0.00270337	0.00377503	0.160945	0.822096	0.0104811
comp2280482_c0_seq1_m.91228	1	0.978459	0.00575121	0.00200967	0.00360065	0.0101796
comp2263983_c0_seq1_m.58208	3	0.00757183	0.0610169	0.891581	0.0274985	0.0123315
comp2274043_c0_seq7_m.76739	5	0.331372	0.0301587	0.0179191	0.0300629	0.590487
comp2280536_c0_seq1_m.91231	1	0.783352	0.097319	0.0315124	0.0433576	0.0444588
comp2277722_c0_seq17_m.86189	1	0.93596	0.00792031	0.00415255	0.00965977	0.0423074
comp2202068_c0_seq1_m.13304	1	0.829485	0.0291834	0.0102288	0.0137183	0.117385
comp2277134_c1_seq4_m.84342	4	0.00181574	0.00215435	0.0633653	0.92377	0.0088945
comp2204754_c0_seq1_m.13720	4	0.000625396	0.000669713	0.0189217	0.975603	0.00418016
comp2268336_c1_seq1_m.65474	2	0.0501493	0.760233	0.129904	0.0355889	0.0241245
comp1910314_c0_seq1_m.2848	1	0.651593	0.286287	0.0164114	0.0110655	0.0346434
comp2271539_c0_seq2_m.71326	2	0.016108	0.974367	0.00505712	0.00195253	0.00251506
comp2277114_c1_seq1_m.84278	4	0.00328298	0.00316001	0.0460927	0.937515	0.00994929
comp2271637_c0_seq1_m.71562	4	0.00197222	0.00228234	0.0519961	0.933979	0.00977051
comp2275542_c0_seq9_m.80087	5	0.20892	0.0151634	0.0193453	0.103399	0.653172
comp2257693_c0_seq3_m.48359	1	0.459113	0.309847	0.0866178	0.084071	0.060351
comp2247098_c0_seq1_m.35275	5	0.029381	0.0385966	0.274708	0.197456	0.459858
comp2279523_c0_seq1_m.91136	5	0.148532	0.0679606	0.0456944	0.0524029	0.68541
comp2261047_c0_seq1_m.53653	5	0.0402889	0.0433586	0.137301	0.111425	0.667626
comp2262720_c0_seq1_m.56199	3	0.00323441	0.0119947	0.93499	0.0401687	0.00961249
comp2226333_c0_seq1_m.20670	2	0.248637	0.686864	0.0232458	0.0123342	0.0289194
comp2265897_c0_seq5_m.61166	2	0.0277965	0.936182	0.0226118	0.00703545	0.00637409
comp2261058_c0_seq1_m.53667	2	0.0383288	0.725265	0.182248	0.0352767	0.0188811
comp2268798_c0_seq2_m.66233	4	0.0241522	0.031622	0.262493	0.641683	0.0400504
comp2277388_c0_seq8_m.85093	1	0.672294	0.0195878	0.0146502	0.0441996	0.249269
comp2257781_c0_seq1_m.48513	4	0.05114	0.0184714	0.0620215	0.780675	0.0876921
comp1196959_c0_seq2_m.1014	4	0.00433783	0.00651751	0.322219	0.634005	0.0329202
comp2275625_c0_seq11_m.80264	1	0.892898	0.017829	0.0075151	0.0136215	0.0681359
comp1194294_c0_seq1_m.785	3	0.0169988	0.151103	0.756676	0.0440824	0.0311399
comp2254346_c0_seq1_m.43876	4	0.00287269	0.00280564	0.0394138	0.941418	0.0134895
comp2265462_c0_seq5_m.60462	1	0.914984	0.0399238	0.00688709	0.00685758	0.0313473
comp2276277_c0_seq18_m.81972	2	0.117574	0.741722	0.0777456	0.0366866	0.0262715
comp2279567_c0_seq1_m.91146	3	0.000455096	0.00193595	0.990814	0.00575095	0.00104367
comp2271350_c0_seq18_m.70897	2	0.015183	0.960505	0.0154714	0.00453999	0.00430032
gnl_Pdu_trscr_assembly_1_1986_m.5698	2	0.352467	0.507167	0.0364929	0.02207	0.0818027
comp2277475_c0_seq2_m.85365	5	0.0594642	0.0114473	0.0270513	0.321319	0.580718
comp1198575_c0_seq1_m.1066	2	0.0419191	0.919069	0.0178996	0.00641345	0.0146987
comp2265703_c0_seq1_m.60844	2	0.29026	0.587152	0.0362344	0.0190532	0.0673008
comp2275358_c0_seq1_m.79627	1	0.837002	0.0215107	0.014207	0.0412384	0.0860419
comp2276805_c0_seq8_m.83380	4	0.0063735	0.00741374	0.204853	0.711879	0.0694807
comp2275610_c0_seq1_m.80236	4	0.0389386	0.0101545	0.0331019	0.728732	0.189073
comp2270372_c0_seq1_m.69078	2	0.0581831	0.832937	0.0703547	0.0228368	0.0156886
comp2268336_c0_seq2_m.65472	2	0.405323	0.48604	0.0413389	0.0304474	0.0368507
comp2270845_c1_seq1_m.69967	4	0.00662491	0.00847019	0.15845	0.792464	0.0339912
comp2269110_c0_seq3_m.66810	2	0.0742467	0.702726	0.115891	0.0366137	0.0705223
comp2266280_c0_seq1_m.61789	2	0.0470161	0.907897	0.026326	0.010013	0.00874762
comp2278012_c0_seq11_m.87235	4	0.0680442	0.013828	0.0366892	0.570851	0.310587
comp2270085_c0_seq9_m.68531	4	0.0025589	0.00221262	0.0261637	0.959954	0.00911041
comp2254477_c0_seq1_m.44015	2	0.0971679	0.861624	0.0203486	0.0098154	0.0110442
comp2274031_c0_seq3_m.76707	4	0.0381672	0.0302808	0.191853	0.412101	0.327598
comp2279235_c0_seq1_m.91078	2	0.187413	0.733567	0.0271028	0.0129724	0.0389447
comp2274888_c0_seq2_m.78557	4	0.0023685	0.00161482	0.0170486	0.934832	0.0441358
comp2269850_c0_seq1_m.68122	4	0.000231533	0.00017109	0.00218774	0.995566	0.00184347
comp2265328_c0_seq2_m.60206	1	0.937772	0.0213021	0.00751269	0.0125221	0.020891
comp2248291_c0_seq1_m.36455	1	0.712875	0.171985	0.0218035	0.0168092	0.0765272
comp2247988_c0_seq1_m.36173	5	0.38508	0.0167693	0.0146041	0.0499439	0.533603
comp2275893_c0_seq1_m.80933	1	0.938881	0.0405615	0.00525998	0.0053763	0.00992155
comp2241424_c0_seq3_m.29932	5	0.0580663	0.117169	0.290389	0.12703	0.407345
comp2274278_c0_seq6_m.77267	1	0.557059	0.102079	0.0401161	0.055861	0.244884
comp2264066_c0_seq3_m.58370	5	0.0130741	0.00559776	0.009972	0.0208773	0.950479
comp2269987_c0_seq2_m.68354	4	0.00650234	0.00535307	0.0499388	0.919669	0.0185367
comp2261018_c0_seq2_m.53614	1	0.985486	0.00281563	0.00104682	0.00193087	0.00872067
comp2264302_c0_seq2_m.58699	1	0.904804	0.0111786	0.00447076	0.00762222	0.0719246
comp2275266_c0_seq21_m.79421	5	0.309589	0.0648562	0.0451351	0.0855969	0.494823
comp2268441_c0_seq1_m.65632	2	0.0268236	0.945777	0.0163186	0.00550178	0.00557869
comp2257585_c0_seq1_m.48216	3	0.00296156	0.00517549	0.569677	0.40596	0.0162265
comp2264838_c0_seq3_m.59436	1	0.9343	0.020562	0.00450714	0.00542032	0.035211
gnl_Pdu_trscr_assembly_1_7327_m.81715	1	0.963909	0.0235649	0.00252171	0.00236593	0.00763822
comp2253149_c0_seq1_m.42245	3	0.0161836	0.293998	0.637359	0.0362034	0.0162559
comp2269326_c0_seq2_m.67220	1	0.894226	0.0140394	0.0082599	0.0217584	0.0617168
comp2263771_c0_seq2_m.57851	3	0.00380523	0.0113259	0.891124	0.0832182	0.0105268
comp2254418_c0_seq1_m.43945	2	0.214423	0.721122	0.024877	0.0123597	0.0272182
gnl_Pdu_trscr_assembly_1_1512_m.69248	5	0.0207262	0.0277461	0.30841	0.285563	0.357555
comp2271425_c0_seq4_m.71034	5	0.111885	0.031436	0.0519758	0.21417	0.590533
comp2250201_c0_seq1_m.38525	3	0.0355208	0.058899	0.558391	0.238866	0.108323
comp2254641_c1_seq1_m.44200	1	0.907277	0.0121416	0.00493366	0.00832451	0.0673236
comp1958245_c0_seq1_m.3536	2	0.192743	0.326003	0.107614	0.0556691	0.317971
comp2243632_c0_seq1_m.31907	1	0.623767	0.320894	0.0190651	0.0138713	0.0224022
comp2276440_c0_seq2_m.82383	4	0.00770174	0.00768608	0.14388	0.740739	0.0999934
comp2269029_c1_seq11_m.66661	5	0.134821	0.240689	0.171613	0.0807575	0.37212
comp2258554_c0_seq1_m.49568	5	0.0125126	0.00395499	0.0148426	0.238315	0.730375
comp2278306_c0_seq2_m.88465	4	0.0258402	0.0160444	0.106021	0.63009	0.222004
comp2265386_c0_seq2_m.60299	2	0.00838405	0.935015	0.0450049	0.00589984	0.00569605
comp1971911_c0_seq1_m.3786	5	0.0409484	0.0275876	0.0396962	0.042461	0.849307
comp2269580_c0_seq1_m.67656	2	0.0123356	0.902574	0.0678869	0.00861212	0.00859103
comp2266882_c0_seq1_m.62832	3	0.00967259	0.0234726	0.805269	0.111498	0.0500878
comp2263896_c0_seq3_m.58065	2	0.0876176	0.854521	0.0299476	0.0134501	0.0144641
comp2278238_c1_seq2_m.88191	2	0.0192536	0.967634	0.00665976	0.00234135	0.00411118
comp2269906_c0_seq2_m.68214	2	0.0186755	0.953614	0.0152152	0.00423862	0.00825696
comp2263346_c1_seq31_m.57192	1	0.978538	0.00569835	0.00149902	0.00211163	0.0121528
comp2270876_c0_seq2_m.70018	1	0.974962	0.00600881	0.00175296	0.00248848	0.0147882
comp2266801_c0_seq2_m.62707	2	0.396546	0.473249	0.0547727	0.0389689	0.036464
gnl_Pdu_trscr_assembly_1_2589_m.58494	1	0.518869	0.411788	0.0186977	0.0119806	0.0386653
comp2274474_c0_seq5_m.77718	1	0.417199	0.241769	0.050566	0.0367196	0.253746
comp2275674_c1_seq1_m.80370	1	0.990151	0.00307249	0.000740548	0.00099947	0.00503652
comp2228430_c0_seq1_m.21640	4	0.0168138	0.0164968	0.206059	0.69163	0.0690004
comp2251806_c0_seq1_m.40480	2	0.0309552	0.93592	0.0164688	0.00536262	0.0112938
comp2281676_c0_seq1_m.91255	3	0.0120488	0.116904	0.817339	0.0347357	0.0189721
comp2271649_c0_seq1_m.71599	5	0.00449992	0.00122826	0.00222207	0.00705016	0.985
comp2277972_c0_seq17_m.87106	2	0.139653	0.75411	0.0534909	0.0255116	0.0272337
comp2272882_c0_seq14_m.74184	1	0.800262	0.161973	0.0114366	0.00942027	0.0169085
comp2247229_c0_seq1_m.35389	2	0.0116283	0.92859	0.0443086	0.00675281	0.00872064
comp2274238_c3_seq9_m.77182	2	0.0562806	0.417537	0.346266	0.0722631	0.107654
comp2272495_c0_seq1_m.73308	3	0.0182067	0.274261	0.648744	0.0419939	0.0167935
comp2244716_c0_seq1_m.32883	3	0.00797977	0.0233816	0.868908	0.0699462	0.0297849
comp2276593_c0_seq3_m.82791	4	0.0106498	0.0132041	0.210428	0.73436	0.0313578
comp2276768_c0_seq2_m.83249	2	0.0122638	0.967586	0.0129959	0.00375971	0.00339442
comp2259918_c0_seq1_m.51762	2	0.0183231	0.861193	0.0945478	0.0144474	0.0114888
comp2248821_c1_seq2_m.37050	1	0.851855	0.0200635	0.011703	0.0308809	0.0854972
comp2277388_c0_seq8_m.85092	5	0.0345871	0.00750729	0.0096943	0.0225746	0.925637
comp2273813_c0_seq2_m.76128	4	0.0420063	0.0316409	0.206132	0.537453	0.182768
comp2275191_c0_seq1_m.79281	3	0.00423636	0.00757207	0.518715	0.451948	0.0175282
comp2277203_c0_seq4_m.84565	2	0.0217293	0.799459	0.144758	0.0211636	0.0128901
comp2271737_c1_seq2_m.71770	1	0.91649	0.0333738	0.0105982	0.0162161	0.0233215
comp2275822_c0_seq10_m.80745	5	0.290168	0.0182516	0.0208807	0.100549	0.57015
comp2274106_c1_seq2_m.76871	4	0.000140986	0.000100805	0.00126449	0.997277	0.00121641
comp1194290_c0_seq1_m.781	1	0.892066	0.0764973	0.00884543	0.00842599	0.0141657
comp2275857_c0_seq4_m.80830	2	0.0110449	0.923669	0.0499437	0.00723098	0.00811125
comp2279445_c0_seq1_m.91120	5	0.0202837	0.0205065	0.147133	0.209892	0.602185
comp2263928_c0_seq2_m.58107	2	0.0217982	0.952464	0.015489	0.00477463	0.00547414
comp2250550_c1_seq1_m.39064	4	0.0170873	0.0221028	0.291282	0.496911	0.172617
comp2347711_c0_seq1_contamination_m.91628	1	0.980724	0.00578607	0.00182792	0.00293797	0.00872441
comp2249227_c0_seq1_m.37479	1	0.541604	0.40403	0.0167523	0.0106069	0.0270067
comp2278534_c0_seq1_m.89879	4	0.000794993	0.000552373	0.00601347	0.98384	0.00879938
comp2272254_c0_seq4_m.72822	5	0.201449	0.0189807	0.0133925	0.0263099	0.739868
comp2265768_c0_seq2_m.60943	1	0.795585	0.0532704	0.0132847	0.0144819	0.123378
comp2261980_c0_seq3_m.55041	4	0.00130303	0.000729037	0.00562795	0.983339	0.00900052
comp2239935_c0_seq1_m.28757	5	0.102885	0.0244494	0.0506797	0.384565	0.437421
comp2277995_c0_seq1_m.87177	4	0.00177864	0.000910476	0.00651293	0.97656	0.0142378
comp2262731_c0_seq1_m.56213	4	0.000687842	0.000683533	0.016617	0.976438	0.00557372
comp2187328_c0_seq1_m.10936	4	0.00310392	0.00227757	0.0254847	0.933188	0.0359457
comp2263822_c0_seq1_m.57945	2	0.0189381	0.810773	0.140674	0.0186588	0.0109567
comp2266171_c0_seq1_m.61557	2	0.00934496	0.911131	0.0653064	0.00770374	0.0065141
comp2256041_c0_seq1_m.46046	2	0.0197866	0.655154	0.284207	0.0264461	0.0144062
comp2265589_c0_seq2_m.60673	2	0.00673006	0.988624	0.00251201	0.000898333	0.00123558
comp2258609_c0_seq1_m.49647	4	0.00282167	0.0037863	0.128381	0.851216	0.0137948
comp2278333_c0_seq10_m.88591	1	0.903794	0.0137607	0.00788666	0.0204713	0.0540873
comp2257905_c0_seq1_m.48664	1	0.962295	0.0132724	0.00267	0.00315115	0.0186115
comp2253875_c0_seq1_m.43271	3	0.00585935	0.0112167	0.702649	0.26315	0.0171248
comp2275714_c2_seq1_m.80469	1	0.712566	0.240642	0.0147037	0.0108735	0.0212152
comp2261971_c0_seq1_m.55022	5	0.0115422	0.00303978	0.00831701	0.0735284	0.903573
comp2268172_c0_seq1_m.65149	2	0.0290416	0.79631	0.126317	0.0226794	0.0256521
comp2266841_c0_seq1_m.62766	3	0.0049981	0.00821488	0.497089	0.461023	0.028675
comp2272491_c1_seq4_m.73302	1	0.896574	0.0466862	0.0126378	0.0183235	0.0257786
comp2262927_c0_seq2_m.56544	3	0.00989375	0.140928	0.807173	0.0264229	0.0155827
comp1926910_c0_seq1_m.3122	1	0.816003	0.0470028	0.0124744	0.0154604	0.109059
comp2258014_c0_seq1_m.48797	5	0.00528588	0.00130478	0.00249242	0.00958872	0.981328
comp2275905_c0_seq4_m.80965	2	0.00498163	0.989911	0.00304056	0.000965775	0.00110101
comp2277869_c0_seq29_m.86707	2	0.0174501	0.95133	0.0205079	0.00582615	0.00488545
comp2272920_c0_seq1_m.74280	4	0.00577476	0.00431197	0.0349098	0.937672	0.017331
comp1876805_c0_seq1_m.2339	3	0.00548609	0.0267461	0.922322	0.0306189	0.0148269
comp2268857_c0_seq2_m.66328	5	0.0370165	0.0080344	0.0141034	0.0656461	0.8752
comp2272807_c0_seq4_m.74003	5	0.0158623	0.00467166	0.015037	0.18411	0.780319
comp2224014_c0_seq1_m.19704	2	0.0086784	0.97069	0.0131251	0.00293997	0.00456633
comp2276634_c1_seq3_m.82935	2	0.00396814	0.978847	0.0131134	0.0021332	0.00193849
comp2277605_c1_seq7_m.85828	3	0.00882915	0.0550992	0.876798	0.048226	0.0110475
comp2272863_c1_seq5_m.74143	1	0.990626	0.00311577	0.000847133	0.00122126	0.00418967
comp1781461_c0_seq1_m.2253	5	0.0307679	0.00555541	0.0121938	0.0935414	0.857941
comp2274137_c1_seq25_m.76929	1	0.841393	0.0971621	0.0175562	0.0192689	0.0246201
comp2277769_c0_seq5_m.86350	2	0.0159215	0.930536	0.037281	0.00828833	0.00797362
comp2277352_c0_seq3_m.84974	4	0.0406793	0.0105495	0.0338029	0.708432	0.206536
comp2273778_c1_seq23_m.76059	4	0.00015531	0.000122902	0.00178078	0.996732	0.00120862
comp2278623_c0_seq6_m.90693	4	0.00251141	0.00303586	0.0734293	0.911065	0.00995793
comp2254376_c0_seq1_m.43911	3	0.0299178	0.0386445	0.400915	0.312234	0.218288
comp2271916_c0_seq1_m.72122	4	0.0044969	0.00637863	0.197936	0.777719	0.0134693
gnl_Pdu_trscr_assembly_1_16296_m.13041	1	0.969129	0.00901183	0.0021317	0.00278873	0.0169389
comp2276491_c0_seq8_m.82522	2	0.0212525	0.961877	0.0092235	0.00336753	0.00427938
comp2260103_c0_seq1_m.51994	1	0.991458	0.00250869	0.000649648	0.000918164	0.00446551
comp1965369_c0_seq1_contamination_m.3664	2	0.0164271	0.956154	0.0168488	0.00427793	0.00629207
comp2276968_c0_seq3_m.83862	3	0.00173831	0.00667502	0.966028	0.0190818	0.00647638
comp2270797_c0_seq10_m.69872	5	0.00537904	0.000901258	0.00144216	0.00573923	0.986538
comp2272299_c0_seq11_m.72914	5	0.105762	0.0187091	0.0142397	0.0237919	0.837497
comp2242933_c0_seq1_m.31351	2	0.00543779	0.986905	0.00486885	0.0013737	0.00141465
comp2268443_c0_seq2_m.65634	4	0.00107944	0.00101858	0.017182	0.976224	0.00449552
comp2260797_c0_seq1_m.53088	2	0.175968	0.788717	0.0146668	0.00781279	0.0128356
comp2260519_c0_seq10_m.52611	2	0.0341885	0.914451	0.0258213	0.00806476	0.0174741
comp2276389_c1_seq15_m.82250	2	0.0651645	0.901829	0.0147606	0.00623695	0.0120092
comp2277505_c0_seq1_m.85479	3	0.0182238	0.0370583	0.580288	0.334669	0.0297604
comp2268964_c0_seq1_m.66515	5	0.0536796	0.0334947	0.0599515	0.0701576	0.782717
comp2267483_c0_seq3_m.63903	1	0.989761	0.00361165	0.000975128	0.00141209	0.00424027
comp2275853_c0_seq1_m.80817	3	0.0011095	0.0029637	0.954172	0.0371115	0.00464361
comp2265471_c0_seq5_m.60488	3	0.000936212	0.00419093	0.981585	0.0103186	0.00296912
comp2277075_c0_seq2_m.84155	3	0.016286	0.0453799	0.778195	0.133803	0.0263362
comp2279536_c0_seq1_m.91140	1	0.830781	0.0947697	0.0130344	0.0117786	0.0496367
comp2269185_c0_seq2_m.66963	1	0.973617	0.00618217	0.00246704	0.00464798	0.0130856
comp2271595_c0_seq2_m.71452	4	0.00214529	0.0026134	0.0911282	0.888595	0.0155181
comp2143334_c0_seq2_m.7649	4	0.0052193	0.0064148	0.155471	0.817308	0.0155865
comp2275270_c0_seq2_m.79424	2	0.00493816	0.989997	0.00289908	0.000865413	0.0012999
comp2276741_c0_seq2_m.83166	2	0.0376895	0.918469	0.0255662	0.0093838	0.00889174
comp2278133_c0_seq3_m.87701	3	0.00178697	0.00809473	0.965022	0.0211283	0.00396774
comp2262137_c0_seq3_m.92268	5	0.00296062	0.000762584	0.00178803	0.00805063	0.986438
comp2269009_c0_seq1_m.66627	1	0.703088	0.236043	0.0147809	0.0104807	0.0356068
comp2223962_c0_seq7_m.19686	1	0.773178	0.176934	0.0124068	0.00909509	0.0283863
comp2277740_c0_seq2_m.86258	2	0.0551416	0.924536	0.00868461	0.00389519	0.0077424
comp2276966_c0_seq13_m.83854	1	0.88198	0.01614	0.00787041	0.0146795	0.0793298
comp2263768_c0_seq2_m.57843	5	0.0185749	0.00510036	0.00810731	0.0241524	0.944065
comp2273519_c1_seq9_m.75533	4	0.0141752	0.0124109	0.0969097	0.848414	0.0280897
comp2273417_c0_seq5_m.75297	1	0.922752	0.0099232	0.00518522	0.0126776	0.0494623
comp2277729_c0_seq10_m.86207	4	0.00628724	0.0038718	0.0318766	0.760311	0.197653
comp2277977_c1_seq3_m.87126	5	0.0527252	0.073827	0.249171	0.144165	0.480112
gnl_Pdu_trscr_assembly_1_2615_m.68529	2	0.0149952	0.973053	0.00683121	0.00235685	0.00276379
comp2269201_c0_seq1_m.67004	1	0.902175	0.0238828	0.00644981	0.00883784	0.0586544
comp2271783_c0_seq2_m.71842	1	0.984474	0.00549913	0.00159228	0.00256384	0.00587033
comp2266680_c0_seq1_m.62479	1	0.988182	0.00350692	0.0010394	0.00160462	0.00566681
comp2267209_c0_seq1_m.63399	5	0.0248581	0.0062371	0.0202763	0.371434	0.577195
comp2275478_c0_seq7_m.79935	4	0.120352	0.100841	0.225745	0.469595	0.083467
comp2278362_c0_seq1_m.88712	1	0.597631	0.020601	0.0178477	0.0662816	0.297638
comp2274581_c1_seq21_m.92631	5	0.195577	0.0172278	0.0120905	0.0229388	0.752166
comp2140166_c0_seq1_m.7086	2	0.0475295	0.673709	0.209789	0.0452958	0.0236769
comp2277351_c1_seq2_m.84968	4	0.00346336	0.00165057	0.0113147	0.926606	0.0569658
comp2278605_c1_seq8_m.90480	4	0.00240026	0.00160835	0.0165584	0.931969	0.0474639
comp2262339_c0_seq1_m.55609	2	0.0204087	0.96855	0.00570588	0.00216692	0.00316813
comp2269060_c1_seq1_m.66719	5	0.00531245	0.00107301	0.00158451	0.00472858	0.987301
comp2257939_c0_seq1_m.48703	1	0.453436	0.364173	0.0379079	0.0249362	0.119546
comp2265464_c0_seq1_m.60472	1	0.987518	0.00724707	0.00105439	0.00117396	0.0030065
comp2250533_c0_seq1_m.39039	5	0.0153236	0.0102597	0.0356329	0.0626577	0.876126
comp2274242_c0_seq2_m.77187	2	0.197406	0.710223	0.0306005	0.0151013	0.0466689
comp2243933_c0_seq1_m.32211	1	0.850721	0.0428493	0.0112201	0.0129071	0.0823027
comp2280591_c0_seq1_m.91233	3	0.0187243	0.204229	0.705835	0.0421058	0.0291064
comp2278422_c0_seq1_m.89011	2	0.0480194	0.557624	0.303161	0.0617445	0.0294512
comp1785956_c0_seq1_m.2259	3	0.0259576	0.0836959	0.71048	0.118321	0.0615456
comp2232290_c0_seq2_m.23637	4	0.00501191	0.00251025	0.0168312	0.867715	0.107932
comp2278062_c0_seq4_m.87412	2	0.0398806	0.794696	0.119549	0.0282203	0.0176541
comp2254470_c0_seq1_m.44006	5	0.015073	0.00707724	0.0343767	0.374923	0.56855
gnl_Pdu_trscr_assembly_1_200732_m.91056	1	0.924937	0.0393157	0.00861814	0.0107287	0.0164002
comp2262137_c0_seq4_m.55246	5	0.039209	0.0238308	0.0756359	0.123955	0.737369
comp2242282_c0_seq1_m.30761	1	0.719837	0.0197576	0.00951482	0.0176734	0.233217
comp2276528_c1_seq4_m.82615	4	0.000250407	0.000227649	0.00434918	0.99377	0.00140292
comp2246502_c0_seq1_m.34680	1	0.880866	0.0909193	0.00754874	0.00629701	0.014369
comp2272087_c1_seq4_m.72458	5	0.0463902	0.0360213	0.075508	0.0829633	0.759117
comp1234630_c0_seq1_m.1254	1	0.861778	0.0900181	0.0121497	0.0126519	0.023402
comp2261368_c1_seq1_m.54120	5	0.00515227	0.00103134	0.00197345	0.00973248	0.98211
comp2246514_c1_seq1_m.34691	5	0.307268	0.021735	0.0132395	0.0242879	0.63347
comp2273356_c0_seq1_m.75157	3	0.00367957	0.00728362	0.811464	0.159004	0.0185692
comp2272698_c0_seq4_m.73763	2	0.00663821	0.968843	0.0182356	0.00345824	0.00282467
comp2232805_c0_seq1_m.23974	2	0.047731	0.606539	0.254437	0.0471853	0.0441072
comp2277947_c0_seq1_m.86990	2	0.311674	0.645306	0.0153872	0.0090095	0.0186234
comp2251346_c0_seq1_m.39994	5	0.0438523	0.01525	0.0198834	0.0318579	0.889156
comp2259349_c0_seq2_m.50877	5	0.184797	0.0698345	0.0435538	0.0476343	0.654181
comp2268869_c0_seq6_m.66344	4	0.0120613	0.0120554	0.196431	0.619246	0.160206
comp2262360_c0_seq1_m.55644	5	0.202665	0.0716146	0.0404295	0.0413562	0.643935
gi_613484551	4	0.000490358	0.000444936	0.00894641	0.985243	0.00487541
comp2257633_c0_seq1_m.48279	1	0.601061	0.319441	0.0196287	0.013122	0.0467471
comp2269297_c0_seq2_m.67181	2	0.00188089	0.994537	0.00237155	0.000543486	0.000667224
comp2278630_c0_seq8_m.90809	1	0.831842	0.0197944	0.0132359	0.039018	0.0961094
comp2269321_c1_seq1_m.67212	1	0.985817	0.00777328	0.00108064	0.00114253	0.00418655
comp2251594_c0_seq1_m.40214	2	0.0243137	0.960229	0.00796706	0.00308943	0.00440045
comp2198016_c0_seq1_m.12499	3	0.00549871	0.0119521	0.82509	0.132668	0.0247907
comp2278308_c1_seq12_m.88483	3	0.0237576	0.0315565	0.35566	0.30051	0.288516
comp2277374_c0_seq2_m.85051	3	0.00357042	0.00672653	0.588089	0.387378	0.014236
comp2271567_c0_seq1_m.71391	4	0.00033431	0.000286212	0.00522872	0.991364	0.00278711
comp2277933_c1_seq7_m.86947	5	0.00865511	0.00363422	0.0147952	0.129549	0.843366
comp2266931_c0_seq5_m.62893	4	0.00119915	0.00107557	0.0189469	0.964073	0.0147049
comp2262300_c0_seq2_m.55547	3	0.0223263	0.0537088	0.685649	0.13152	0.106796
comp1226347_c0_seq1_m.1231	3	0.0203194	0.0637578	0.696985	0.186009	0.0329286
comp2272842_c0_seq2_m.74081	1	0.982905	0.00386015	0.00143565	0.00264565	0.00915403
comp2231610_c0_seq1_m.23229	3	0.0055584	0.0578208	0.906907	0.0209174	0.0087968
comp2278031_c0_seq2_m.87291	2	0.0531493	0.502245	0.342626	0.0721332	0.0298471
comp2263291_c0_seq2_m.57114	2	0.00365756	0.98251	0.0102232	0.00178693	0.00182266
comp2276272_c0_seq2_m.81963	4	0.00792714	0.00371131	0.022874	0.788385	0.177103
comp2275191_c1_seq2_m.79282	3	0.000306108	0.00104989	0.991555	0.00604338	0.00104603
comp2279272_c0_seq1_m.91086	3	0.0428809	0.0993114	0.577263	0.148312	0.132233
comp2275662_c1_seq10_m.80344	4	0.00253587	0.00146778	0.0123418	0.942528	0.0411264
comp2275445_c0_seq2_m.79869	5	0.0894281	0.0549283	0.0506815	0.0554046	0.749557
comp2276523_c0_seq2_m.82609	2	0.0101613	0.982718	0.00392262	0.0013884	0.00180972
comp2233777_c0_seq1_m.24586	4	0.0199562	0.0190777	0.15681	0.462545	0.341611
comp2272782_c0_seq2_m.73955	1	0.723983	0.236684	0.0114517	0.00832694	0.0195537
comp2277282_c0_seq11_m.84762	2	0.0525996	0.858199	0.0540037	0.0178614	0.0173364
comp2143411_c0_seq1_m.7656	2	0.0315233	0.938949	0.0141445	0.00478988	0.010593
comp2237757_c0_seq1_m.27251	3	0.00264153	0.0210588	0.957214	0.0147	0.00438526
comp2269060_c0_seq1_m.66718	5	0.0411861	0.00490081	0.00793188	0.044487	0.901494
comp2275153_c0_seq1_m.79199	3	0.00506509	0.0086996	0.561855	0.385328	0.0390523
comp2263508_c0_seq1_m.57408	3	0.00237084	0.00475556	0.82744	0.153804	0.0116294
comp2257282_c0_seq1_m.47769	1	0.584385	0.33782	0.0205623	0.0144117	0.0428203
comp2274999_c0_seq4_m.78837	3	0.00162708	0.00520678	0.959477	0.0285143	0.00517488
comp2278376_c0_seq1_m.88768	5	0.0117933	0.00342461	0.0102846	0.0973367	0.877161
comp2279615_c0_seq1_m.91158	1	0.697351	0.172946	0.0228755	0.0185114	0.0883162
comp2269601_c0_seq3_m.67709	4	0.0101284	0.0103766	0.175096	0.662391	0.142007
comp2262441_c0_seq1_m.55760	2	0.280146	0.546516	0.04768	0.0248362	0.100822
comp2280694_c0_seq1_m.91236	3	0.0382054	0.369091	0.473939	0.0570046	0.06176
comp2267634_c0_seq2_m.64174	2	0.188566	0.511434	0.0899568	0.0416679	0.168376
comp2277908_c1_seq11_m.86865	3	0.0116964	0.0354332	0.76326	0.167925	0.0216854
comp2250281_c0_seq1_m.38657	2	0.0159336	0.974389	0.00479785	0.00178684	0.00309239
comp2138952_c0_seq1_m.6867	4	0.00174311	0.00221275	0.0907545	0.893486	0.0118034
comp2265326_c0_seq3_m.60204	5	0.0131707	0.00672168	0.0407619	0.443259	0.496087
comp2236992_c0_seq1_m.26663	2	0.277425	0.567894	0.0432972	0.0243656	0.087019
comp2272182_c0_seq2_m.72649	4	0.00948764	0.00893812	0.115256	0.838442	0.0278768
comp2270458_c0_seq1_m.69251	5	0.0154364	0.00536822	0.0173289	0.124373	0.837493
comp2275759_c0_seq17_m.80560	2	0.448381	0.498729	0.0175655	0.0111206	0.0242048
comp2244968_c0_seq1_m.33120	2	0.0113968	0.928517	0.0454327	0.0066993	0.00795401
comp2274819_c0_seq2_m.78403	2	0.00284069	0.994113	0.00180319	0.000538049	0.000704934
comp2254167_c0_seq1_m.43587	2	0.0168131	0.838109	0.119592	0.0158616	0.00962445
comp2273193_c0_seq1_m.74830	5	0.170916	0.14146	0.080058	0.0577905	0.549775
comp2273204_c0_seq26_m.74869	5	0.0376282	0.00945075	0.0222966	0.178778	0.751846
comp2258349_c0_seq1_m.49322	1	0.868726	0.0147941	0.00930141	0.025801	0.0813775
comp2245014_c0_seq2_m.33157	1	0.931644	0.0485552	0.00512445	0.00495184	0.0097242
comp2272547_c0_seq4_m.73421	1	0.932473	0.00768494	0.00372085	0.00826476	0.0478569
comp2278222_c0_seq3_m.88116	1	0.759894	0.172712	0.0206271	0.0193413	0.0274254
comp1244797_c0_seq1_m.1278	3	0.000420664	0.00142021	0.988755	0.00806833	0.00133591
comp2268115_c0_seq2_m.65034	2	0.43193	0.499792	0.019918	0.0120506	0.0363094
comp2267571_c0_seq4_m.64058	1	0.955242	0.0315157	0.00300259	0.0027424	0.00749691
comp2272583_c0_seq2_m.73488	1	0.522734	0.0188604	0.0139255	0.0402784	0.404202
comp2254394_c0_seq2_m.43926	5	0.0939346	0.256893	0.231588	0.0928604	0.324724
comp2236007_c0_seq2_m.26049	2	0.00573498	0.986933	0.00428381	0.00118568	0.0018621
comp2268194_c0_seq1_m.65186	1	0.969711	0.0108084	0.00245643	0.00333617	0.0136878
comp2276825_c0_seq1_m.83424	3	0.00253408	0.00511597	0.773167	0.20714	0.0120435
comp1197507_c0_seq1_m.1032	2	0.0224264	0.957974	0.00952546	0.00331904	0.00675552
comp2265735_c0_seq4_m.60895	5	0.0670084	0.00883069	0.0143354	0.0886269	0.821199
comp2279297_c0_seq1_m.91091	2	0.021104	0.708498	0.23178	0.0227708	0.0158472
comp2274295_c0_seq2_m.77311	4	0.000483912	0.000297841	0.00290563	0.991265	0.00504779
comp2278509_c0_seq8_m.89637	4	0.000888604	0.000620465	0.00707827	0.978838	0.0125743
comp2211414_c0_seq1_m.14992	5	0.0590785	0.0324348	0.117314	0.283061	0.508112
comp2226643_c0_seq1_m.20830	1	0.877536	0.0461292	0.00894322	0.00978704	0.0576042
comp2189372_c0_seq1_m.11219	1	0.983241	0.00899289	0.00142838	0.00155611	0.00478185
comp2268937_c0_seq1_m.66472	4	0.00652939	0.0102438	0.294687	0.666221	0.0223183
comp2197446_c0_seq1_m.12404	3	0.0237226	0.0603433	0.697501	0.124978	0.0934555
comp2261716_c0_seq2_m.54597	4	0.00686424	0.007597	0.183612	0.736615	0.0653123
comp2273595_c0_seq1_m.75667	4	0.0320403	0.00884225	0.0315464	0.51734	0.410231
comp2263661_c0_seq1_m.57595	5	0.0166109	0.0103558	0.0275882	0.0434199	0.902025
comp2272371_c0_seq1_m.73054	1	0.529905	0.0222874	0.0200196	0.0633267	0.364461
comp2279450_c0_seq1_m.91124	3	0.00124692	0.00363042	0.964094	0.0258041	0.00522425
comp2254675_c0_seq1_m.44244	1	0.640736	0.25985	0.0251225	0.0184807	0.0558111
comp2269171_c0_seq3_m.66933	2	0.0161343	0.706269	0.243854	0.0200453	0.0136977
comp2251386_c0_seq2_m.40044	2	0.31511	0.613933	0.0224195	0.0125164	0.0360207
comp2265370_c0_seq1_m.60276	1	0.943544	0.0357732	0.00401103	0.00385226	0.0128196
comp2228369_c0_seq1_m.21627	5	0.0157049	0.00878724	0.0435445	0.248673	0.683291
comp2278589_c0_seq3_m.90346	5	0.00466291	0.00120128	0.00270413	0.0121623	0.979269
comp2280178_c0_seq1_m.91219	5	0.0919781	0.0120055	0.0112598	0.0254528	0.859304
comp2275406_c1_seq7_m.79751	3	0.00142511	0.00488678	0.963207	0.0263066	0.00417431
comp2275110_c1_seq5_m.79090	2	0.00443254	0.99034	0.00321744	0.000967841	0.00104208
comp2272724_c0_seq1_m.73818	5	0.0264808	0.0221292	0.11378	0.186618	0.650992
comp2277088_c0_seq32_m.84183	5	0.0131947	0.00536444	0.0153586	0.0479433	0.918139
comp2275841_c0_seq1_m.80783	5	0.25648	0.0448937	0.0265136	0.0421455	0.629968
comp2269593_c0_seq3_m.67692	3	0.000647254	0.00200075	0.979143	0.0160431	0.00216576
comp2277675_c0_seq81_m.86041	4	0.195003	0.0325427	0.062477	0.44041	0.269567
comp2264743_c0_seq3_m.59295	5	0.0571677	0.00944725	0.0209043	0.18028	0.732201
comp2276577_c0_seq8_m.92288	4	0.000540384	0.000551748	0.0132896	0.982658	0.00296017
comp2271413_c1_seq5_m.70995	1	0.995293	0.00134186	0.000357867	0.000528426	0.00247907
comp2236614_c0_seq1_m.26450	4	0.00514306	0.00316157	0.0281055	0.851046	0.112543
comp2224448_c0_seq1_m.19874	1	0.514895	0.304745	0.0346651	0.0246324	0.121062
comp2278366_c0_seq5_m.88731	1	0.663578	0.0620744	0.0197636	0.0231843	0.2314
comp2275467_c0_seq60_m.79906	2	0.0215315	0.908231	0.0492295	0.00987843	0.0111295
comp2277816_c0_seq2_m.86536	5	0.319053	0.0423558	0.0402136	0.0921488	0.506229
comp2261428_c0_seq1_m.54200	5	0.219694	0.0260699	0.037594	0.14806	0.568582
comp2270148_c0_seq3_m.68661	2	0.00830246	0.978041	0.0080472	0.00206218	0.00354698
comp2252746_c0_seq1_m.41651	1	0.986601	0.00541317	0.00112029	0.00135865	0.00550688
comp2265077_c0_seq1_m.59810	2	0.0180075	0.947273	0.0199974	0.00516152	0.00956082
comp2273645_c0_seq11_m.75781	2	0.0121495	0.942294	0.0330815	0.00636608	0.00610859
comp2278010_c1_seq9_m.87231	1	0.99558	0.00206138	0.000395238	0.000505782	0.00145799
comp2273865_c0_seq2_m.76255	2	0.0190622	0.902407	0.0581377	0.0120713	0.00832154
comp2276159_c1_seq5_m.81677	5	0.00957419	0.00386925	0.0179693	0.227978	0.740609
comp2271244_c0_seq1_m.70676	4	0.0254791	0.0282418	0.312907	0.420207	0.213165
comp2278474_c0_seq1_m.89294	1	0.885652	0.0144047	0.00856352	0.023094	0.0682858
comp2254456_c0_seq2_m.43993	4	0.00635093	0.0071018	0.172762	0.747013	0.0667721
comp1945561_c0_seq2_m.3380	5	0.00990545	0.00180706	0.00349284	0.0181336	0.966661
comp2206512_c0_seq1_m.14012	2	0.209206	0.709128	0.0378517	0.0198218	0.0239927
comp2208474_c0_seq1_m.14351	2	0.122067	0.849543	0.0114322	0.00560758	0.0113505
comp2276413_c0_seq21_m.82313	1	0.756232	0.021933	0.0118556	0.0267295	0.18325
comp2252285_c0_seq2_m.41107	1	0.790055	0.0200992	0.00885466	0.0162534	0.164738
comp2273216_c0_seq3_m.74900	3	0.00299446	0.00682485	0.851076	0.123958	0.0151463
comp2257070_c0_seq2_m.47513	4	0.00266175	0.00210558	0.0254073	0.936017	0.0338089
comp2265255_c2_seq1_m.60100	4	0.00145296	0.00143065	0.0325123	0.953349	0.0112548
gnl_Pdu_trscr_assembly_1_3048_m.12984	3	0.00535752	0.0117063	0.782261	0.171788	0.028887
comp2263909_c0_seq2_m.58087	4	0.0103151	0.0136061	0.337888	0.491806	0.146384
comp2270828_c0_seq11_m.69939	1	0.977335	0.00451463	0.00142516	0.00226739	0.0144577
comp2273647_c0_seq2_m.75785	5	0.0101213	0.00530968	0.0316223	0.313176	0.63977
comp2237468_c0_seq1_m.27022	1	0.99543	0.00130859	0.000351527	0.000520786	0.00238932
comp2254520_c0_seq1_m.44059	1	0.456062	0.112056	0.0353742	0.0347676	0.36174
comp2279213_c0_seq1_m.91075	2	0.0204355	0.962818	0.00857501	0.0030127	0.00515929
comp2277416_c0_seq3_m.85174	4	0.000925783	0.000963342	0.0240481	0.967028	0.00703433
gnl_Pdu_trscr_assembly_1_9334_m.28552	4	0.00171655	0.000974673	0.00824472	0.95883	0.0302343
comp2260058_c0_seq1_m.51934	2	0.0590256	0.834925	0.0558146	0.0174079	0.0328274
comp2268892_c0_seq1_m.66381	5	0.0331112	0.00820115	0.00867283	0.0149969	0.935018
comp2263873_c0_seq9_m.58029	5	0.0726944	0.0401391	0.0968946	0.141016	0.649256
comp2278363_c0_seq7_m.88713	1	0.776623	0.0182785	0.00843868	0.0150498	0.18161
comp2277759_c0_seq3_m.86312	3	0.00279399	0.00535094	0.736552	0.241884	0.013419
comp2254206_c0_seq1_m.43646	2	0.00656997	0.980471	0.00876546	0.00219335	0.00200008
comp2274301_c0_seq6_m.77327	3	0.00449451	0.0108895	0.877044	0.0920163	0.0155558
comp2234809_c0_seq1_m.25266	2	0.0365147	0.85241	0.0655839	0.0152999	0.0301914
comp2269230_c0_seq2_m.67055	5	0.0424635	0.00763771	0.0155863	0.127459	0.806853
comp2275312_c0_seq8_m.79518	5	0.00820089	0.00347385	0.0113847	0.0512957	0.925645
comp2107035_c0_seq2_m.6021	2	0.336041	0.410378	0.0574137	0.0355702	0.160597
comp2273017_c0_seq1_m.74484	5	0.316314	0.0257485	0.0160284	0.0296099	0.612299
comp1953876_c0_seq1_m.3493	3	0.00357656	0.00759781	0.736522	0.241188	0.0111149
comp2269158_c0_seq1_m.66914	3	0.00134671	0.00769227	0.978308	0.00915208	0.0035014
comp2258193_c0_seq1_m.49089	2	0.0417965	0.938906	0.00894569	0.00364573	0.00670652
comp2256245_c0_seq1_m.46340	5	0.11193	0.0255507	0.0202821	0.0340976	0.80814
gnl_Pdu_trscr_assembly_1_1986_m.5697	5	0.0878844	0.0109157	0.0192344	0.130046	0.751919
comp2274806_c0_seq1_m.78376	4	0.0178787	0.00539935	0.0218396	0.657002	0.297881
comp2254426_c0_seq1_m.43954	1	0.982553	0.00432658	0.00159602	0.00292251	0.00860225
gnl_Pdu_trscr_assembly_1_200732_m.91055	1	0.938273	0.0421599	0.00500224	0.00504079	0.00952403
comp2272233_c0_seq1_m.72760	5	0.0463155	0.00455157	0.00521428	0.0178656	0.926053
comp2267341_c0_seq1_m.63653	2	0.00554519	0.989994	0.0024214	0.000790552	0.00124881
comp2250470_c0_seq1_m.38949	2	0.0321836	0.773068	0.142285	0.0226464	0.0298172
comp2252059_c0_seq1_m.40786	3	0.00491943	0.0382254	0.924283	0.0212798	0.0112921
gnl_Pdu_trscr_assembly_1_12794_m.61443	4	0.000634754	0.000644083	0.0170212	0.976478	0.00522173
comp2267732_c0_seq2_m.64331	1	0.449783	0.224287	0.0450437	0.0342692	0.246617
comp2271994_c0_seq2_m.72269	5	0.00368293	0.000832256	0.00194063	0.0117304	0.981814
comp2277945_c0_seq2_m.86985	4	0.00395941	0.00258186	0.0266843	0.879343	0.0874311
comp2248226_c3_seq1_m.36365	2	0.0229306	0.796009	0.139328	0.0182194	0.0235124
comp1916779_c0_seq1_m.2944	1	0.975611	0.00763672	0.00188937	0.00245922	0.012404
comp2266507_c0_seq10_m.62138	1	0.463535	0.251028	0.0447954	0.0327745	0.207867
comp2276940_c0_seq2_m.83802	5	0.00874143	0.00370598	0.0135783	0.0742011	0.899773
comp2273257_c0_seq9_m.74986	2	0.0139615	0.848892	0.115181	0.0124807	0.00948407
comp2274517_c0_seq1_m.77807	3	0.0348992	0.0905829	0.576178	0.258464	0.0398755
comp2263250_c0_seq1_m.57052	2	0.150994	0.709089	0.0502082	0.0210774	0.0686317
comp2278454_c0_seq1_m.89160	4	0.0165076	0.00540679	0.022224	0.775707	0.180155
comp2260394_c0_seq1_m.52394	2	0.280325	0.666845	0.0175919	0.00971093	0.0255265
comp2261373_c0_seq1_m.54127	5	0.0548693	0.0388917	0.0832884	0.0943824	0.728568
comp2276936_c0_seq3_m.83786	2	0.0198011	0.906182	0.0546366	0.0103985	0.00898174
comp2272519_c1_seq3_m.73361	4	0.00780659	0.0045784	0.0329313	0.741961	0.212723
comp2278480_c0_seq4_m.89330	4	0.00123179	0.00126583	0.0328364	0.95273	0.0119357
comp2257601_c0_seq2_m.48241	5	0.356174	0.0916669	0.0412689	0.0442465	0.466644
comp2268906_c0_seq4_m.66401	4	0.0144831	0.0151613	0.184876	0.420361	0.365119
isotig10568_m.92324	5	0.0313926	0.0133514	0.0175208	0.0242595	0.913476
gnl_Pdu_trscr_assembly_1_14638_m.60097	1	0.975349	0.00927516	0.00181699	0.0021804	0.0113783
comp2259363_c0_seq16_m.50888	3	0.000680247	0.00279607	0.986539	0.00800832	0.00197666
gnl_Pdu_trscr_assembly_1_7964_m.49648	3	0.0011014	0.00312765	0.964998	0.0258101	0.00496303
comp2275068_c1_seq1_m.78996	2	0.0143229	0.867236	0.0945574	0.0118131	0.0120707
comp2270279_c0_seq7_m.68904	2	0.302034	0.647998	0.0164169	0.0094076	0.0241434
comp2277312_c0_seq10_m.84862	2	0.0198284	0.733959	0.208787	0.0223892	0.015036
comp2272641_c0_seq2_m.73619	4	0.0163606	0.014325	0.156164	0.710169	0.102981
comp2248808_c0_seq2_m.37043	5	0.0668248	0.019455	0.0179834	0.026825	0.868912
comp2249005_c0_seq2_m.37257	3	0.00217728	0.0066261	0.942193	0.040883	0.00812067
comp2274541_c0_seq1_m.77862	5	0.0217602	0.00440755	0.00849206	0.0495055	0.915835
comp2278471_c0_seq8_m.89279	3	0.00326046	0.0101243	0.926181	0.0531816	0.00725276
comp2274748_c1_seq11_m.78259	5	0.110471	0.0313009	0.0288746	0.0455715	0.783782
comp2274909_c0_seq7_m.78615	4	0.000378391	0.000356126	0.00746766	0.988759	0.00303839
comp2262740_c0_seq13_m.56232	4	0.0195806	0.0104008	0.0625257	0.802725	0.104768
comp2274783_c0_seq9_m.78326	4	0.0143227	0.0102142	0.0699366	0.45398	0.451546
comp2265923_c0_seq1_m.61202	5	0.0142749	0.00863804	0.0434401	0.146875	0.786772
gnl_Pdu_trscr_assembly_1_998_m.15062	2	0.430294	0.476049	0.0251368	0.0152332	0.0532871
gnl_Pdu_trscr_assembly_1_5530_m.58454	5	0.0481117	0.00694509	0.0129552	0.0749039	0.857084
comp2267968_c0_seq2_m.64758	5	0.0254738	0.0184727	0.0881389	0.21092	0.656994
comp2139380_c0_seq1_m.6935	3	0.000628084	0.00293227	0.987616	0.00737874	0.001445
comp2276442_c0_seq1_m.82386	5	0.122255	0.0103065	0.0106079	0.0364755	0.820355
gnl_Pdu_trscr_assembly_1_16681_m.81096	4	0.00450045	0.00238247	0.0160415	0.923869	0.0532062
gnl_Pdu_trscr_assembly_1_15590_m.29311	4	0.000547055	0.00048939	0.00824431	0.986681	0.00403849
comp2267169_c0_seq1_m.63315	2	0.00262231	0.994013	0.00201785	0.000554363	0.000792235
comp2273926_c0_seq5_m.76421	4	0.00242336	0.00267025	0.080841	0.894351	0.0197141
comp2273249_c0_seq4_m.74967	1	0.949737	0.00852593	0.00352488	0.00710047	0.0311112
comp2278554_c0_seq4_m.90013	5	0.167145	0.0116824	0.0133937	0.0587836	0.748996
comp2269345_c0_seq1_m.67253	3	0.00565305	0.0132033	0.837025	0.106401	0.0377167
comp2269374_c0_seq3_m.67298	4	0.0151986	0.0173073	0.248812	0.525592	0.19309
comp2272319_c0_seq24_m.72950	2	0.00396403	0.981438	0.0108737	0.00197794	0.00174673
comp1326513_c0_seq1_m.1923	2	0.225571	0.723966	0.0182372	0.00981784	0.0224087
comp2275107_c0_seq4_m.79080	5	0.0880461	0.0310417	0.0244011	0.0303158	0.826195
tuba_m.92505	2	0.047321	0.761399	0.136531	0.0272863	0.0274635
comp2271636_c1_seq22_m.71557	1	0.620409	0.273468	0.0358506	0.0325401	0.0377321
comp2139115_c0_seq1_m.6894	5	0.0052045	0.00233446	0.00617004	0.0155535	0.970737
comp2268874_c0_seq62_m.66354	5	0.0104243	0.00414551	0.0127657	0.0520413	0.920623
gene17_m.92593	2	0.00433599	0.984459	0.00789664	0.00173296	0.00157506
gnl_Pdu_trscr_assembly_1_326_m.78835	5	0.00618089	0.00251162	0.00637031	0.0173163	0.967621
comp2278480_c1_seq1_m.89333	4	0.00117451	0.000957239	0.0146528	0.965911	0.0173048
comp2278268_c0_seq9_m.88316	5	0.0165404	0.00613554	0.0284769	0.450317	0.49853
comp2276648_c1_seq1_m.82962	5	0.00282324	0.000942694	0.00194186	0.0058312	0.988461
comp2277501_c0_seq23_m.85461	5	0.0151068	0.00781993	0.0449065	0.348807	0.58336
gnl_Pdu_trscr_assembly_1_16061_m.43221	5	0.211249	0.0143958	0.0103372	0.0227299	0.741288
comp2266701_c0_seq3_m.62512	4	0.00369427	0.00261659	0.0238376	0.936304	0.0335476
gnl_Pdu_trscr_assembly_1_1213_m.70099	2	0.106277	0.589205	0.129304	0.0420486	0.133165
comp2253516_c0_seq4_m.42708	4	0.0148206	0.00714281	0.0369453	0.491363	0.449728
gnl_Pdu_trscr_assembly_1_19681_m.92605	3	0.00410835	0.0272062	0.935777	0.0257431	0.00716503
comp2239691_c0_seq1_m.28548	5	0.0262733	0.0117946	0.0250149	0.04453	0.892387
comp2261379_c0_seq1_m.54133	5	0.0627914	0.0810598	0.141525	0.0907478	0.623876
comp2268417_c0_seq2_m.65592	5	0.0132482	0.00251292	0.00521228	0.0353433	0.943683
comp2277933_c1_seq7_m.86946	4	0.00581312	0.00325288	0.026066	0.787225	0.177643
comp2273141_c0_seq2_m.74737	4	0.00571057	0.0051373	0.0841664	0.806446	0.0985395
comp2276426_c0_seq2_m.82339	5	0.130765	0.0126575	0.00971623	0.0198013	0.82706
comp2278378_c0_seq4_m.88778	4	0.00952725	0.00666212	0.0568834	0.5112	0.415728
comp2271225_c0_seq5_m.70641	5	0.0328086	0.0153936	0.0222839	0.0321822	0.897332
comp2273038_c0_seq3_m.74522	5	0.0110783	0.0063995	0.03764	0.332888	0.611994
comp2278587_c0_seq14_m.90327	5	0.00966112	0.00412244	0.0215913	0.407733	0.556892
comp2278405_c0_seq22_m.88893	4	0.00394545	0.00244861	0.0222797	0.869471	0.101856
comp2261623_c0_seq1_m.54431	5	0.0090383	0.00397662	0.0167444	0.0970007	0.87324
comp2272691_c0_seq4_m.73750	4	0.000407401	0.000325986	0.00467833	0.990651	0.00393771
comp2274909_c0_seq7_m.78613	4	0.000551714	0.000471635	0.0070052	0.987996	0.00397502
comp2225664_c0_seq1_m.20382	4	0.0025492	0.00313225	0.114612	0.858179	0.0215281
comp2257070_c0_seq2_m.47512	4	0.00114581	0.00103497	0.0195757	0.963465	0.0147785

## Sheet: allSex
	cluster	membership.1	membership.2	membership.3
comp2232909_c0_seq1_m.24034	2	0.315474	0.369007	0.315518
gnl_Pdu_trscr_assembly_1_20144_m.60515	1	0.360831	0.278363	0.360806
comp2274537_c0_seq28_m.77857	2	0.304878	0.390196	0.304925
gnl_Pdu_trscr_assembly_1_18157_m.24773	3	0.348903	0.302175	0.348922
gnl_Pdu_trscr_assembly_1_5614_m.48467	1	0.370899	0.258215	0.370886
comp2265386_c0_seq2_m.60299	1	0.364281	0.271468	0.36425
comp2277972_c0_seq17_m.87106	2	0.222869	0.554222	0.22291
comp2347711_c0_seq1_contamination_m.91628	2	0.312261	0.375431	0.312308
comp1785956_c0_seq1_m.2259	1	0.387935	0.224216	0.387849
comp2272087_c1_seq4_m.72458	1	0.370521	0.258961	0.370518
comp2232805_c0_seq1_m.23974	2	0.299595	0.400762	0.299643
comp2239022_c0_seq1_m.28102	2	0.234525	0.530903	0.234573
comp2277282_c0_seq11_m.84762	2	0.239862	0.520234	0.239904
comp2254675_c0_seq1_m.44244	3	0.356349	0.2873	0.356351
comp2263011_c0_seq1_m.56689	1	0.379036	0.242011	0.378953
comp2260058_c0_seq1_m.51934	1	0.383505	0.233072	0.383424
gnl_Pdu_trscr_assembly_1_91632_m.21453	1	0.387077	0.225974	0.38695

## Sheet: allLunar
	cluster	membership.1	membership.2	membership.3	membership.4	membership.5
comp2257674_c0_seq1_m.48339	1	0.881274	0.0438889	0.0187005	0.0361657	0.0199706
comp2276295_c0_seq1_m.82012	1	0.386863	0.259813	0.127607	0.119261	0.106457
gnl_Pdu_trscr_assembly_1_11607_m.26425	1	0.763668	0.0997455	0.0380427	0.0606494	0.0378946
comp2271419_c1_seq1_m.71009	1	0.450475	0.0844954	0.0649514	0.295311	0.104767
comp2278037_c0_seq3_m.87323	1	0.665375	0.216484	0.0434101	0.0413934	0.0333378
comp2266005_c0_seq5_m.61322	4	0.17639	0.183201	0.197446	0.244476	0.198487
comp2271675_c0_seq2_m.71655	1	0.87724	0.0504566	0.0199305	0.032233	0.02014
comp2229729_c0_seq1_m.22264	1	0.579011	0.0839836	0.0557025	0.202756	0.0785472
comp2263921_c0_seq2_m.58101	4	0.135076	0.053351	0.0605914	0.613766	0.137215
comp2278433_c0_seq2_m.89062	1	0.488238	0.360898	0.0593758	0.0488235	0.0426647
comp2277951_c0_seq2_m.87004	1	0.829398	0.0959273	0.0248334	0.0286169	0.0212239
comp2261334_c1_seq1_m.54085	2	0.0373751	0.916891	0.0234686	0.0108571	0.0114078
comp2273765_c1_seq6_m.76032	1	0.816436	0.0529358	0.0282683	0.0675939	0.0347664
comp2263394_c0_seq1_m.57263	4	0.0372082	0.0184712	0.0243522	0.856059	0.0639094
comp2277083_c0_seq3_m.84173	2	0.216228	0.665188	0.052604	0.0339514	0.0320288
comp2277132_c1_seq1_m.84335	4	0.345255	0.0839655	0.0731222	0.366638	0.131019
comp2277680_c0_seq25_m.86056	2	0.0550192	0.708606	0.160966	0.0309208	0.0444879
comp2273576_c0_seq1_m.75622	2	0.0726827	0.849732	0.0382125	0.0196656	0.0197076
comp2272118_c0_seq11_m.72524	1	0.823857	0.0515858	0.0270584	0.0646973	0.0328012
comp2270519_c0_seq1_m.69360	2	0.387007	0.45399	0.0658902	0.0484234	0.0446898
comp2276747_c1_seq2_m.83192	1	0.52987	0.324015	0.0552053	0.0506846	0.0402255
comp2274413_c0_seq1_m.77564	1	0.681381	0.182712	0.045796	0.0526086	0.0375032
comp2257395_c0_seq4_m.47951	1	0.641971	0.120838	0.0571901	0.118423	0.0615769
comp2233700_c1_seq1_m.24550	1	0.747691	0.0801895	0.0390785	0.0887365	0.0443042
comp2276461_c0_seq7_m.82444	2	0.287345	0.54436	0.0736065	0.0484281	0.0462601
comp2247176_c0_seq3_m.35337	3	0.015511	0.0342565	0.846089	0.0270736	0.0770696
comp2262197_c0_seq1_m.55346	4	0.0163474	0.0105743	0.0181361	0.887961	0.0669807
comp2275701_c1_seq1_m.80440	1	0.530666	0.241198	0.0743577	0.0912281	0.0625501
comp2278161_c0_seq3_m.87805	1	0.828824	0.0841975	0.0268341	0.0352827	0.0248616
comp2252506_c0_seq1_m.41372	4	0.0483106	0.0297443	0.052347	0.625598	0.244
comp2263073_c0_seq1_m.56786	2	0.0949805	0.733275	0.0902962	0.0395983	0.0418497
comp2261191_c0_seq5_m.53883	1	0.29998	0.112179	0.108344	0.297914	0.181583
comp2256866_c0_seq1_m.47132	2	0.222342	0.546231	0.106463	0.0602745	0.06469
comp2278390_c0_seq1_m.88826	2	0.0757718	0.831267	0.0464958	0.0229789	0.023486
comp2276668_c0_seq1_m.83017	2	0.0298766	0.891113	0.0489556	0.0130694	0.0169852
comp2271944_c0_seq11_m.72172	1	0.844915	0.0850047	0.0229492	0.0271621	0.0199688
comp2271594_c0_seq8_m.71451	3	0.011246	0.0301315	0.905161	0.0145998	0.0388616
comp2274262_c0_seq1_m.77231	2	0.0780302	0.813089	0.0555432	0.0260152	0.0273223
comp2275974_c0_seq18_m.81146	1	0.699878	0.191052	0.0391249	0.0391286	0.0308165
comp2272433_c0_seq1_m.73197	2	0.234467	0.583066	0.0788244	0.0552982	0.0483442
comp2264121_c0_seq1_m.58459	4	0.0909567	0.0470657	0.0567845	0.683864	0.121329
comp2265494_c0_seq1_m.60519	4	0.0185022	0.0121579	0.0217083	0.862184	0.0854475
comp2276377_c0_seq2_m.82218	2	0.071548	0.730389	0.11822	0.0362727	0.0435706
comp2245603_c0_seq1_m.33759	4	0.0267452	0.0206266	0.0482147	0.489679	0.414734
gnl_Pdu_trscr_assembly_1_1644_m.62862	2	0.105398	0.809255	0.0408737	0.0220122	0.0224605
comp2254568_c0_seq1_m.44123	2	0.0200505	0.936641	0.025652	0.00787682	0.00977925
comp2275616_c0_seq2_m.80253	4	0.223976	0.107677	0.110098	0.375783	0.182466
comp2278238_c0_seq6_m.88188	1	0.434656	0.0883496	0.0699011	0.291848	0.115246
comp1977957_c0_seq1_m.3878	4	0.153763	0.068187	0.0720318	0.573718	0.1323
comp2212572_c0_seq1_m.15390	1	0.777368	0.129097	0.0312618	0.0363575	0.0259164
comp2263667_c0_seq1_m.57601	5	0.06685	0.0751843	0.199514	0.289998	0.368454
comp2274121_c0_seq4_m.76896	2	0.0992232	0.788376	0.0554457	0.0284924	0.0284625
comp2270576_c0_seq1_m.69463	4	0.114846	0.047399	0.0532302	0.670405	0.11412
comp1953077_c0_seq1_m.3483	2	0.100374	0.704597	0.107798	0.0385754	0.0486555
gnl_Pdu_trscr_assembly_1_4228_m.63259	2	0.118906	0.492432	0.234302	0.0620437	0.0923164
comp2259823_c0_seq1_m.51564	4	0.156081	0.182183	0.2114	0.245741	0.204596
comp2273929_c1_seq1_m.76435	2	0.0659968	0.866384	0.03329	0.0170019	0.0173271
comp2263691_c0_seq2_m.57661	2	0.0460668	0.78441	0.112417	0.0238158	0.0332906
comp2273628_c0_seq6_m.75728	2	0.134365	0.48196	0.220665	0.0668261	0.0961842
comp2201786_c0_seq1_m.13247	4	0.052496	0.0239625	0.0295888	0.820666	0.0732869
comp2272437_c1_seq1_m.73204	2	0.0466455	0.806832	0.092402	0.023817	0.0303036
comp2275833_c0_seq1_m.80771	2	0.0745066	0.701642	0.13935	0.0353718	0.0491292
comp2267172_c0_seq1_m.63318	1	0.744421	0.0941659	0.0412423	0.0773931	0.0427778
comp2204672_c0_seq1_m.13711	3	0.00972326	0.025962	0.91712	0.0134453	0.0337495
comp2276173_c0_seq1_m.81727	2	0.0638555	0.853468	0.0420769	0.0199933	0.0206059
comp2242407_c0_seq1_m.30845	4	0.0276975	0.0140117	0.0199346	0.876244	0.0621127
comp2269773_c0_seq6_m.68002	1	0.729826	0.170777	0.0354592	0.0358589	0.0280789
comp2263787_c0_seq3_m.57874	4	0.111067	0.0464421	0.0569843	0.634649	0.150858
comp2266512_c0_seq8_m.62145	5	0.0209689	0.0190749	0.0545977	0.193583	0.711775
comp2279748_c0_seq1_m.91174	2	0.0841129	0.624473	0.178323	0.0504763	0.0626152
comp2273142_c0_seq1_m.74744	3	0.00917176	0.0192848	0.900531	0.0157136	0.0552992
comp2274537_c0_seq28_m.77857	2	0.190989	0.634255	0.0832586	0.0439163	0.0475805
comp2271257_c1_seq1_m.70699	2	0.138457	0.740272	0.0562957	0.0332508	0.0317245
comp1201878_c0_seq1_m.1138	5	0.0235351	0.0323434	0.228272	0.0832784	0.632571
comp2222959_c0_seq1_m.19328	3	0.0620377	0.18612	0.572968	0.0619611	0.116913
comp2232113_c0_seq1_m.23538	4	0.0310239	0.0245293	0.0569307	0.49341	0.394106
comp2268225_c0_seq5_m.65245	4	0.020065	0.0133222	0.0236444	0.847036	0.0959323
comp2004487_c0_seq1_m.4269	5	0.0852867	0.112624	0.277967	0.23302	0.291102
comp2273190_c0_seq1_m.74828	2	0.0308877	0.927918	0.0215905	0.00947315	0.010131
comp2273900_c0_seq1_m.76336	2	0.0180623	0.947308	0.0197172	0.00688281	0.00802999
comp2277337_c0_seq4_m.84929	1	0.803194	0.0687453	0.0329953	0.0584427	0.036623
comp2257131_c0_seq2_m.47590	5	0.0198043	0.0238466	0.11607	0.0904941	0.749785
gnl_Pdu_trscr_assembly_1_3867_m.65412	1	0.867119	0.0438392	0.0207744	0.0443524	0.0239151
gnl_Pdu_trscr_assembly_1_17807_m.62055	4	0.0253689	0.0137149	0.0202483	0.878349	0.062319
comp2258349_c0_seq1_m.49321	2	0.0176186	0.943845	0.022767	0.0071377	0.00863151
comp2278377_c0_seq3_m.88774	2	0.0488988	0.882208	0.0362631	0.0157826	0.0168474
gnl_Pdu_trscr_assembly_1_18157_m.24773	3	0.133792	0.180686	0.24972	0.226112	0.209689
comp2264068_c0_seq1_m.58373	2	0.0334148	0.918659	0.0258931	0.0102464	0.0117864
gnl_Pdu_trscr_assembly_1_1797_m.38383	1	0.594554	0.0825076	0.0553587	0.187686	0.0798938
comp2280536_c0_seq1_m.91231	2	0.038112	0.890675	0.0399257	0.0146527	0.0166351
comp2268336_c1_seq1_m.65474	1	0.573025	0.157909	0.0797198	0.107943	0.0814021
comp1910314_c0_seq1_m.2848	3	0.00517954	0.013889	0.954801	0.00716315	0.0189676
comp2247098_c0_seq1_m.35275	4	0.0173355	0.0112282	0.0206176	0.847352	0.103467
comp2261047_c0_seq1_m.53653	5	0.0337841	0.0268686	0.0633258	0.381799	0.494222
comp2278100_c0_seq14_m.87565	2	0.202668	0.625007	0.0795392	0.0454862	0.0472992
comp2265897_c0_seq5_m.61166	2	0.158639	0.387391	0.219117	0.117053	0.1178
comp2254548_c0_seq3_m.44097	5	0.0548962	0.0399243	0.0837696	0.350713	0.470697
comp2268798_c0_seq2_m.66233	1	0.932302	0.0247475	0.0107333	0.0205287	0.0116886
comp2270517_c0_seq1_m.69357	1	0.464807	0.359837	0.069605	0.0559469	0.0498042
comp2257781_c0_seq1_m.48513	1	0.652807	0.197056	0.0503124	0.0587328	0.0410925
comp2276031_c0_seq51_m.81297	5	0.0485686	0.0438188	0.116716	0.258926	0.531971
comp1194294_c0_seq1_m.785	4	0.0588376	0.0304482	0.0425299	0.752824	0.11536
comp2276277_c0_seq18_m.81972	2	0.273532	0.589099	0.0596856	0.0398869	0.0377964
comp2271896_c0_seq2_m.72093	1	0.470061	0.270568	0.0940567	0.0866905	0.0786234
comp2271909_c0_seq2_m.72111	1	0.317204	0.143827	0.129163	0.222795	0.187012
comp2271895_c0_seq9_m.72087	2	0.28886	0.453397	0.112114	0.0741589	0.0714695
comp2235681_c0_seq1_m.25791	5	0.0114537	0.0110022	0.0363107	0.0689214	0.872312
comp2269738_c0_seq1_m.67939	2	0.283377	0.366798	0.152365	0.0919126	0.105548
comp2265703_c0_seq1_m.60844	3	0.0213291	0.037665	0.678726	0.0455959	0.216684
comp2271802_c0_seq1_m.71876	2	0.0661489	0.810362	0.0700716	0.0238869	0.0295306
comp2266675_c0_seq1_m.62468	1	0.86117	0.07154	0.0210563	0.027196	0.0190378
comp2072973_c0_seq1_m.5296	4	0.0764785	0.0723193	0.145775	0.414204	0.291223
comp2271654_c0_seq4_m.71616	2	0.188214	0.691713	0.0535678	0.034308	0.0321975
comp2268336_c0_seq2_m.65472	2	0.105554	0.6949	0.110538	0.0392415	0.0497661
comp2270845_c1_seq1_m.69967	1	0.543867	0.0892983	0.0635085	0.208349	0.0949764
comp2279235_c0_seq1_m.91078	3	0.0179356	0.0325546	0.736726	0.0377302	0.175053
comp2248291_c0_seq1_m.36455	3	0.0139797	0.030628	0.860414	0.0229285	0.0720501
comp2275893_c0_seq1_m.80933	2	0.0605473	0.600429	0.243704	0.0382829	0.0570366
comp2241424_c0_seq3_m.29932	5	0.0579078	0.0412616	0.0819047	0.3972	0.421726
comp2278485_c0_seq1_m.89374	4	0.0307178	0.0194403	0.0348503	0.755877	0.159114
comp2269987_c0_seq2_m.68354	1	0.810526	0.0625914	0.0301796	0.0628953	0.0338075
comp2277317_c0_seq1_m.84875	2	0.0529952	0.896591	0.0249028	0.0125799	0.0129316
comp2264302_c0_seq2_m.58699	3	0.0213287	0.0650681	0.831026	0.0243012	0.0582758
comp2275266_c0_seq21_m.79421	3	0.163937	0.219477	0.270505	0.132159	0.213922
comp2259230_c0_seq1_m.50704	2	0.0523535	0.888502	0.0298562	0.0142348	0.0150536
comp2254418_c0_seq1_m.43945	3	0.0190111	0.0445014	0.82622	0.0312181	0.0790492
comp2253561_c0_seq1_m.42779	5	0.0128593	0.0145098	0.0626619	0.0547646	0.855205
comp2274246_c0_seq1_m.77191	2	0.122129	0.344977	0.323985	0.0791226	0.129786
comp2254641_c1_seq1_m.44200	3	0.0161392	0.0511578	0.871071	0.018582	0.0430499
comp2273466_c0_seq2_m.75427	5	0.022686	0.0279591	0.134018	0.0972228	0.718114
comp1958245_c0_seq1_m.3536	5	0.0126949	0.0147795	0.0709321	0.0492009	0.852393
comp2244437_c0_seq1_m.32653	5	0.0212996	0.0286436	0.187061	0.0715868	0.691409
comp2269029_c1_seq11_m.66661	5	0.0252089	0.0257361	0.0893956	0.133833	0.725826
comp2265386_c0_seq2_m.60299	4	0.0288341	0.0169646	0.0279855	0.815944	0.110271
comp2269580_c0_seq1_m.67656	4	0.0358094	0.0263197	0.0489882	0.715873	0.173009
comp2208016_c0_seq1_m.14262	3	0.11086	0.187142	0.320947	0.17103	0.210021
comp2278238_c1_seq2_m.88191	3	0.0245811	0.0478664	0.731249	0.047548	0.148755
comp2269906_c0_seq2_m.68214	5	0.0145014	0.0184095	0.111906	0.054521	0.800662
comp2270876_c0_seq2_m.70018	3	0.017999	0.0615227	0.855988	0.0200328	0.0444571
comp2274474_c0_seq5_m.77718	3	0.0337023	0.0514309	0.434442	0.0751209	0.405304
comp2243258_c0_seq1_m.31584	5	0.0426849	0.0517068	0.199997	0.194911	0.510701
comp2251806_c0_seq1_m.40480	5	0.0224431	0.0321648	0.277442	0.0658192	0.602131
comp2281676_c0_seq1_m.91255	4	0.0655857	0.0299779	0.0362476	0.782511	0.0856776
comp2257487_c0_seq1_m.48064	3	0.0167926	0.0425376	0.851661	0.0252278	0.0637805
comp2274238_c3_seq9_m.77182	4	0.112692	0.0698003	0.111523	0.368143	0.337841
comp2244716_c0_seq1_m.32883	4	0.0644139	0.0332185	0.0432255	0.755348	0.103794
comp2248821_c1_seq2_m.37050	2	0.0739869	0.691595	0.147274	0.0361573	0.0509867
comp2278234_c1_seq4_m.88159	2	0.181778	0.647817	0.0803679	0.0451239	0.0449129
comp2275191_c0_seq1_m.79281	1	0.439954	0.0848088	0.0652069	0.306239	0.103791
comp2271737_c1_seq2_m.71770	2	0.0386032	0.848869	0.070295	0.0186418	0.0235908
comp1194290_c0_seq1_m.781	2	0.0598983	0.634412	0.215345	0.0369248	0.053419
comp2279445_c0_seq1_m.91120	4	0.0395452	0.0239124	0.0408744	0.715559	0.180109
comp2263928_c0_seq2_m.58107	3	0.0878282	0.195726	0.424975	0.120127	0.171343
comp2249227_c0_seq1_m.37479	3	0.012575	0.038965	0.896795	0.0155132	0.0361514
comp2265768_c0_seq2_m.60943	3	0.0137231	0.0296514	0.863152	0.0215203	0.0719528
comp2277176_c0_seq2_m.84466	1	0.544093	0.106323	0.0715037	0.182345	0.0957351
comp2139434_c0_seq1_m.6943	5	0.0185339	0.0166059	0.0483483	0.194282	0.72223
comp2258609_c0_seq1_m.49647	1	0.520832	0.0847004	0.060943	0.24151	0.0920148
comp2278333_c0_seq10_m.88591	2	0.0514993	0.74916	0.133683	0.0272594	0.0383981
comp2257975_c0_seq1_m.48752	1	0.798242	0.0900432	0.0330588	0.0463144	0.0323416
comp2241299_c0_seq1_m.29837	5	0.054177	0.0572351	0.163057	0.295485	0.430045
comp2272491_c1_seq4_m.73302	2	0.025657	0.915618	0.0352241	0.0103543	0.0131466
comp2208429_c0_seq1_m.14341	4	0.0358192	0.0268853	0.0556521	0.632405	0.249239
comp2268046_c1_seq1_m.64874	5	0.0182433	0.0157379	0.0435384	0.178505	0.743976
comp2224014_c0_seq1_m.19704	5	0.0119684	0.012455	0.0456959	0.0614419	0.868439
comp2274137_c1_seq25_m.76929	2	0.027128	0.900503	0.0446314	0.0122785	0.0154586
comp2226635_c0_seq1_m.20829	5	0.0142171	0.0163116	0.0717699	0.0764011	0.8213
comp1965369_c0_seq1_contamination_m.3664	5	0.0493449	0.0654658	0.276033	0.179281	0.429875
comp2268964_c0_seq1_m.66515	5	0.0281429	0.0282301	0.0875526	0.180923	0.675151
gnl_Pdu_trscr_assembly_1_15577_m.47320	4	0.0332452	0.0270921	0.0620281	0.529279	0.348356
comp2269421_c0_seq7_m.67382	4	0.0349712	0.0223672	0.0405139	0.701875	0.200273
comp2269009_c0_seq1_m.66627	3	0.0123918	0.0330646	0.894398	0.0163174	0.0438283
comp2223962_c0_seq7_m.19686	3	0.0100953	0.0298196	0.915833	0.0129623	0.0312899
comp2276966_c0_seq13_m.83854	3	0.0404834	0.154403	0.682326	0.0421478	0.0806403
comp2273417_c0_seq5_m.75297	2	0.0718385	0.554644	0.262238	0.043368	0.0679123
comp2277977_c1_seq3_m.87126	4	0.0444713	0.0338316	0.0742393	0.471196	0.376262
comp2275478_c0_seq7_m.79935	1	0.753933	0.144222	0.0343572	0.0391443	0.0283432
comp2217905_c0_seq1_m.17239	4	0.0937834	0.0994149	0.202667	0.315546	0.288589
comp2237053_c0_seq1_m.26700	4	0.0114739	0.00749255	0.0134375	0.910511	0.0570856
comp2243933_c0_seq1_m.32211	3	0.0246444	0.057895	0.793011	0.0346343	0.0898155
comp2280591_c0_seq1_m.91233	4	0.0520331	0.027307	0.0366601	0.785965	0.0980346
comp1785956_c0_seq1_m.2259	4	0.0993005	0.0474487	0.0581752	0.667427	0.127649
comp2268029_c2_seq11_m.64856	1	0.612324	0.183218	0.0670397	0.0759041	0.0615148
comp2275457_c1_seq8_m.79890	1	0.792034	0.11331	0.0309313	0.0373811	0.0263436
comp2254470_c0_seq1_m.44006	4	0.207478	0.0937225	0.107789	0.382386	0.208624
gnl_Pdu_trscr_assembly_1_200732_m.91056	2	0.0478217	0.780103	0.112446	0.0256363	0.0339928
comp2262137_c0_seq4_m.55246	4	0.0379034	0.0339629	0.0849913	0.430447	0.412695
comp2277243_c0_seq1_m.84667	2	0.249631	0.584786	0.0747131	0.0452434	0.0456265
comp2272087_c1_seq4_m.72458	5	0.0242223	0.0209213	0.0576955	0.19211	0.705051
comp2232805_c0_seq1_m.23974	4	0.0691024	0.0347734	0.0493295	0.687316	0.159479
comp2268869_c0_seq6_m.66344	4	0.0640301	0.0299682	0.036937	0.780522	0.0885432
comp2262360_c0_seq1_m.55644	5	0.0242429	0.0333771	0.234324	0.0719425	0.636114
comp2278630_c0_seq8_m.90809	2	0.0398914	0.831564	0.0829614	0.0193054	0.0262778
comp2252790_c0_seq1_m.41691	4	0.0481584	0.026426	0.037535	0.781823	0.106058
comp2275027_c0_seq1_m.78898	1	0.861587	0.0668688	0.0219999	0.0289129	0.020631
comp2275445_c0_seq2_m.79869	5	0.0716544	0.071633	0.190963	0.172056	0.493694
comp2143411_c0_seq1_m.7656	5	0.0237766	0.0352775	0.336488	0.0661174	0.538341
comp2224040_c0_seq1_m.19713	4	0.0255518	0.0193371	0.0436914	0.563524	0.347895
comp2141229_c0_seq1_m.7283	3	0.0264317	0.0462993	0.618395	0.056874	0.252
comp2262441_c0_seq1_m.55760	3	0.0248523	0.0392356	0.466264	0.0618847	0.407764
comp2263950_c0_seq2_m.58147	4	0.0631617	0.0394913	0.0600438	0.663176	0.174127
comp2280694_c0_seq1_m.91236	4	0.0444586	0.0285979	0.0482273	0.703333	0.175384
comp2267634_c0_seq2_m.64174	5	0.0247634	0.0302714	0.153685	0.0782316	0.713049
comp2265326_c0_seq3_m.60204	4	0.080955	0.040101	0.0533037	0.692623	0.133018
comp2256770_c0_seq1_m.46959	4	0.0322274	0.0196384	0.0337442	0.767384	0.147005
comp2244968_c0_seq1_m.33120	4	0.0284002	0.0228921	0.0531916	0.550464	0.345052
comp2273193_c0_seq1_m.74830	5	0.0140131	0.0165704	0.0787167	0.0548064	0.835893
comp2273204_c0_seq26_m.74869	1	0.285325	0.20674	0.168515	0.160868	0.178552
comp2254394_c0_seq2_m.43926	5	0.0608763	0.0489115	0.108627	0.259402	0.522183
comp2236007_c0_seq2_m.26049	5	0.0300792	0.0455125	0.368447	0.0864666	0.469494
comp1197507_c0_seq1_m.1032	3	0.0368435	0.0565999	0.419285	0.0802345	0.407037
comp2189372_c0_seq1_m.11219	3	0.0425018	0.196573	0.647774	0.0396635	0.0734876
comp2197446_c0_seq1_m.12404	4	0.0535177	0.0332624	0.0512436	0.723127	0.138849
comp2220386_c0_seq1_m.18230	3	0.0785406	0.135625	0.390036	0.155269	0.240529
comp2250906_c0_seq2_m.39444	3	0.025604	0.0463274	0.662479	0.0572763	0.208313
comp2257415_c0_seq1_m.47965	4	0.0507678	0.0432323	0.0994619	0.447661	0.358877
comp2272378_c0_seq1_m.73076	4	0.0336959	0.027769	0.0643053	0.532988	0.341242
comp2254668_c0_seq2_m.44236	4	0.0313648	0.0257378	0.0607375	0.467943	0.414217
comp2272559_c0_seq1_m.73440	5	0.0106049	0.0113439	0.0455329	0.0516975	0.880821
comp2270148_c0_seq3_m.68661	5	0.0109921	0.0136835	0.0778793	0.0442368	0.853208
comp2206512_c0_seq1_m.14012	2	0.101797	0.422284	0.297117	0.0779205	0.100882
comp2208474_c0_seq1_m.14351	3	0.00834689	0.0247964	0.930534	0.0106255	0.0256977
comp2263011_c0_seq1_m.56689	1	0.766119	0.0763387	0.0385707	0.0739014	0.0450705
comp2237468_c0_seq1_m.27022	3	0.0432679	0.19295	0.650501	0.0386523	0.0746287
comp2254520_c0_seq1_m.44059	3	0.0417032	0.066852	0.489612	0.0784436	0.323389
comp2264796_c2_seq1_m.59361	5	0.0140692	0.0167337	0.0796572	0.0582559	0.831284
comp2260058_c0_seq1_m.51934	5	0.0293901	0.0340194	0.146739	0.0962631	0.693588
comp2268892_c0_seq1_m.66381	5	0.0237882	0.0309306	0.179802	0.0717087	0.693771
comp2263873_c0_seq9_m.58029	5	0.0555697	0.0566513	0.150119	0.328591	0.409069
comp2251705_c0_seq1_m.40358	3	0.0257335	0.0515248	0.723786	0.0508604	0.148096
comp2234809_c0_seq1_m.25266	5	0.0207515	0.0200909	0.063279	0.10977	0.786108
comp2269230_c0_seq2_m.67055	2	0.246367	0.267243	0.199362	0.126755	0.160274
comp2258193_c0_seq1_m.49089	3	0.0246163	0.0556675	0.779608	0.0388804	0.101228
comp2271381_c1_seq12_m.70942	4	0.0548552	0.035417	0.0572181	0.670257	0.182252
comp2267341_c0_seq1_m.63653	3	0.0172235	0.0357876	0.811762	0.0312692	0.103958
comp2250470_c0_seq1_m.38949	4	0.0509935	0.0405165	0.0907458	0.411443	0.406301
comp2267732_c0_seq2_m.64331	3	0.0372273	0.0580387	0.45909	0.0761223	0.369522
comp2248226_c3_seq1_m.36365	4	0.0300052	0.0218298	0.0468108	0.558584	0.34277
comp1916779_c0_seq1_m.2944	3	0.0238032	0.0819694	0.812687	0.0258449	0.0556959
comp2266507_c0_seq10_m.62138	3	0.0377098	0.0604464	0.492844	0.0747194	0.334281
comp2273257_c0_seq9_m.74986	4	0.0730851	0.0379807	0.0479277	0.734396	0.106611
comp2274517_c0_seq1_m.77807	1	0.814962	0.0618564	0.0297324	0.0602636	0.033186
comp2263250_c0_seq1_m.57052	5	0.024739	0.0352331	0.285409	0.0723613	0.582257
comp2260394_c0_seq1_m.52394	3	0.0107359	0.0269775	0.904831	0.0149092	0.0425467
comp2276936_c0_seq3_m.83786	4	0.143878	0.125179	0.162573	0.358371	0.209999
comp2268906_c0_seq4_m.66401	4	0.0612527	0.0292585	0.0403349	0.743354	0.1258
isotig10568_m.92324	5	0.00671356	0.00744778	0.0324409	0.0305318	0.922866
comp2279773_c0_seq1_m.91181	5	0.0354171	0.0544075	0.386333	0.0966187	0.427224
comp2274783_c0_seq9_m.78326	4	0.186887	0.0777014	0.0902138	0.441977	0.203221
gnl_Pdu_trscr_assembly_1_998_m.15062	3	0.0206629	0.042361	0.793252	0.0329212	0.110803
comp1838578_c0_seq1_m.2293	4	0.0264578	0.0191681	0.041289	0.613226	0.299859
comp2273249_c0_seq4_m.74967	2	0.0835468	0.406243	0.360979	0.0556846	0.0935473
comp2278554_c0_seq4_m.90013	3	0.0904619	0.2983	0.420869	0.0676689	0.1227
tuba_m.92505	4	0.112328	0.111203	0.187007	0.323417	0.266044
comp2139115_c0_seq1_m.6894	5	0.0254023	0.0222315	0.0609299	0.171961	0.719475
gnl_Pdu_trscr_assembly_1_326_m.78835	5	0.0347711	0.0315888	0.0887984	0.188946	0.655896
gnl_Pdu_trscr_assembly_1_1213_m.70099	5	0.00952025	0.00982406	0.0371368	0.0489384	0.894581
comp2239691_c0_seq1_m.28548	5	0.0172759	0.017574	0.0605821	0.130757	0.773811
comp2261379_c0_seq1_m.54133	5	0.028854	0.024304	0.0633489	0.221793	0.6617
comp2271225_c0_seq5_m.70641	5	0.0296931	0.030508	0.102167	0.127712	0.70992
comp2261623_c0_seq1_m.54431	4	0.0286916	0.0194958	0.0369684	0.732349	0.182495
