# Supplementary material for: Combined transcriptome and proteome profiling reveals specific molecular brain signatures for sex, maturation and circalunar clock phase
Source: eLife. 2019 Feb 15;8:e41556. doi: 10.7554/eLife.41556 (PMC6377233; doi:10.7554/eLife.41556)
Supplement: Figure 5—source data 10. — Table containing the results of the GO-term analysis on transcript level. Individual GO-terms are shown with their respective p-values in each of the three comparisons (maturation, sex, and lunar), as well as their ontolgy, i.e. Molecular Function, Biological Process, or Cellular Compartment. [file elife-41556-fig5-data10.xlsx]

## Sheet: OVER
frame.go_id	Term	Pvalue_Mat	Pvalue_Sex	Pvalue_Lun	ontology
GO:0000276	mitochondrial proton-transporting ATP synthase complex, coupling factor F(o)	0.0364355	1	1	CC
GO:0000413	protein peptidyl-prolyl isomerization	0.022299	1	0.00165415	BP
GO:0000786	nucleosome	0.0160366	1	0.00220754	CC
GO:0003676	nucleic acid binding	1	1	0.0181833	MF
GO:0003735	structural constituent of ribosome	1	1	1.98e-08	MF
GO:0003755	peptidyl-prolyl cis-trans isomerase activity	0.0279621	1	0.00199679	MF
GO:0003774	motor activity	0.0353208	1	1	MF
GO:0003779	actin binding	0.041549	1	1	MF
GO:0004089	carbonate dehydratase activity	1	0.0323356	1	MF
GO:0004198	calcium-dependent cysteine-type endopeptidase activity	0.0314807	1	1	MF
GO:0005198	structural molecule activity	0.0104711	1	1	MF
GO:0005319	lipid transporter activity	1	0.0323356	1	MF
GO:0005488	binding	0.0324065	1	1	MF
GO:0005509	calcium ion binding	0.00238	1	0.000188	MF
GO:0005622	intracellular	0.0101525	1	0.0463035	CC
GO:0005623	cell	0.0438953	1	0.0293861	CC
GO:0005694	chromosome	1	1	0.0167293	CC
GO:0005739	mitochondrion	0.00877471	1	1	CC
GO:0005740	mitochondrial envelope	0.00761794	1	1	CC
GO:0005743	mitochondrial inner membrane	0.00813496	1	1	CC
GO:0005783	endoplasmic reticulum	0.0188919	1	1	CC
GO:0005840	ribosome	1	1	6.37e-07	CC
GO:0005975	carbohydrate metabolic process	0.0190285	1	1	BP
GO:0006006	glucose metabolic process	0.0281851	1	1	BP
GO:0006090	pyruvate metabolic process	0.00325591	1	1	BP
GO:0006091	generation of precursor metabolites and energy	0.0135989	1	1	BP
GO:0006096	glycolytic process	0.00362276	1	1	BP
GO:0006163	purine nucleotide metabolic process	8.03e-05	1	1	BP
GO:0006165	nucleoside diphosphate phosphorylation	0.00129678	1	1	BP
GO:0006323	DNA packaging	0.0186845	1	0.00499964	BP
GO:0006333	chromatin assembly or disassembly	0.0186845	1	0.00499964	BP
GO:0006334	nucleosome assembly	0.0186845	1	0.00499964	BP
GO:0006412	translation	1	1	4.38e-06	BP
GO:0006508	proteolysis	0.0386135	1	1	BP
GO:0006518	peptide metabolic process	1	1	2.14e-05	BP
GO:0006730	one-carbon metabolic process	1	0.0389924	1	BP
GO:0006733	oxidoreduction coenzyme metabolic process	0.00288261	1	1	BP
GO:0006753	nucleoside phosphate metabolic process	0.00990854	1	1	BP
GO:0006811	ion transport	1	0.0349356	1	BP
GO:0006826	iron ion transport	1	0.0131454	1	BP
GO:0006869	lipid transport	1	0.0325857	1	BP
GO:0006873	cellular ion homeostasis	1	0.0196624	1	BP
GO:0006875	cellular metal ion homeostasis	1	0.0196624	1	BP
GO:0006879	cellular iron ion homeostasis	1	0.0131454	1	BP
GO:0006904	vesicle docking involved in exocytosis	1	1	0.0369123	BP
GO:0007155	cell adhesion	1	1	0.00609715	BP
GO:0007156	homophilic cell adhesion via plasma membrane adhesion molecules	1	1	0.0127345	BP
GO:0007160	cell-matrix adhesion	0.00129678	1	0.00300329	BP
GO:0007264	small GTPase mediated signal transduction	0.0202784	1	1	BP
GO:0008199	ferric iron binding	1	0.0162905	1	MF
GO:0008234	cysteine-type peptidase activity	0.0111048	1	1	MF
GO:0009059	macromolecule biosynthetic process	1	1	2.22e-05	BP
GO:0009124	nucleoside monophosphate biosynthetic process	0.000390828	1	1	BP
GO:0009126	purine nucleoside monophosphate metabolic process	0.000144744	1	1	BP
GO:0009135	purine nucleoside diphosphate metabolic process	0.00362276	1	1	BP
GO:0009141	nucleoside triphosphate metabolic process	1	1	0.0496163	BP
GO:0009142	nucleoside triphosphate biosynthetic process	2.58e-05	1	1	BP
GO:0009144	purine nucleoside triphosphate metabolic process	2.61e-05	1	1	BP
GO:0009152	purine ribonucleotide biosynthetic process	0.000161887	1	1	BP
GO:0009161	ribonucleoside monophosphate metabolic process	0.000564732	1	1	BP
GO:0009168	purine ribonucleoside monophosphate biosynthetic process	7.22e-05	1	1	BP
GO:0009185	ribonucleoside diphosphate metabolic process	0.00362276	1	1	BP
GO:0009199	ribonucleoside triphosphate metabolic process	2.61e-05	1	1	BP
GO:0009205	purine ribonucleoside triphosphate metabolic process	1	1	0.0496163	BP
GO:0009206	purine ribonucleoside triphosphate biosynthetic process	2.58e-05	1	1	BP
GO:0009259	ribonucleotide metabolic process	0.000213331	1	1	BP
GO:0015078	proton transmembrane transporter activity	0.0302772	1	0.00860152	MF
GO:0015629	actin cytoskeleton	0.00516902	1	1	CC
GO:0015986	ATP synthesis coupled proton transport	0.00984816	1	1	BP
GO:0016646	oxidoreductase activity, acting on the CH-NH group of donors, NAD or NADP as acceptor	1	1	0.039672	MF
GO:0016714	oxidoreductase activity, acting on paired donors, with incorporation or reduction of molecular oxygen, reduced pteridine as one donor, and incorporation of one atom of oxygen	1	0.0243435	1	MF
GO:0016776	phosphotransferase activity, phosphate group as acceptor	1	1	0.025909	MF
GO:0016853	isomerase activity	0.0025531	1	1	MF
GO:0018193	peptidyl-amino acid modification	0.00905003	1	0.00300329	BP
GO:0019205	nucleobase-containing compound kinase activity	1	1	0.0413869	MF
GO:0019363	pyridine nucleotide biosynthetic process	0.00793821	1	1	BP
GO:0019439	aromatic compound catabolic process	0.0154299	1	1	BP
GO:0019538	protein metabolic process	1	1	0.0215793	BP
GO:0019825	oxygen binding	1	0.00267757	0.00360723	MF
GO:0019843	rRNA binding	0.0287881	1	1	MF
GO:0020037	heme binding	1	0.0193076	1	MF
GO:0030031	cell projection assembly	1	1	0.0369123	BP
GO:0030042	actin filament depolymerization	1	1	0.0233284	BP
GO:0032991	protein-containing complex	1	1	0.00775696	CC
GO:0034641	cellular nitrogen compound metabolic process	1	1	0.000904015	BP
GO:0043228	non-membrane-bounded organelle	1	1	8.98e-06	CC
GO:0043229	intracellular organelle	0.0482481	1	0.000751651	CC
GO:0043232	intracellular non-membrane-bounded organelle	0.000243419	1	1	CC
GO:0043604	amide biosynthetic process	1	1	3.05e-06	BP
GO:0044249	cellular biosynthetic process	1	1	0.00124978	BP
GO:0044260	cellular macromolecule metabolic process	1	1	0.0160236	BP
GO:0044270	cellular nitrogen compound catabolic process	0.00793821	1	1	BP
GO:0044422	organelle part	0.00250616	1	1	CC
GO:0044430	cytoskeletal part	0.0027362	1	1	CC
GO:0044455	mitochondrial membrane part	0.0438813	1	1	CC
GO:0045259	proton-transporting ATP synthase complex	0.0171673	1	1	CC
GO:0046031	ADP metabolic process	0.00362276	1	1	BP
GO:0046034	ATP metabolic process	0.000161887	1	1	BP
GO:0046390	ribose phosphate biosynthetic process	0.000342288	1	1	BP
GO:0046496	nicotinamide nucleotide metabolic process	0.00288261	1	1	BP
GO:0046700	heterocycle catabolic process	0.00793821	1	1	BP
GO:0046982	protein heterodimerization activity	0.00423336	1	0.000408273	MF
GO:0046983	protein dimerization activity	1	1	0.0380227	MF
GO:0048878	chemical homeostasis	1	0.0389924	1	BP
GO:0050793	regulation of developmental process	1	1	0.0133176	BP
GO:0051082	unfolded protein binding	0.0442615	1	1	MF
GO:0055076	transition metal ion homeostasis	1	0.0131454	1	BP
GO:0055080	cation homeostasis	1	0.0196624	1	BP
GO:0071824	protein-DNA complex subunit organization	0.0186845	1	0.00499964	BP
GO:0072330	monocarboxylic acid biosynthetic process	0.00905003	1	1	BP
GO:0072522	purine-containing compound biosynthetic process	0.00101933	1	1	BP
GO:0072524	pyridine-containing compound metabolic process	0.00118906	1	1	BP
GO:0098609	cell-cell adhesion	1	1	0.0127345	BP
GO:0098771	inorganic ion homeostasis	1	0.0196624	1	BP
GO:0098798	mitochondrial protein complex	0.0171673	1	1	CC
GO:0140056	organelle localization by membrane tethering	1	1	0.0369123	BP
GO:1901135	carbohydrate derivative metabolic process	0.00481569	1	1	BP
GO:1901292	nucleoside phosphate catabolic process	0.00793821	1	1	BP
GO:1901361	organic cyclic compound catabolic process	0.0154299	1	1	BP
GO:1901566	organonitrogen compound biosynthetic process	1	1	0.000163106	BP
GO:1902600	proton transmembrane transport	0.0342061	1	0.0377489	BP

## Sheet: UNDER
frame.go_id	Term	Pvalue_Mat	Pvalue_Sex	Pvalue_Lun	ontology
GO:0016021	integral component of membrane	0.0353351	NA	0.00372878	CC
GO:0031224	intrinsic component of membrane	0.0295019	NA	0.00324998	CC
GO:0044428	nuclear part	0.000596868	NA	0.0471014	CC
GO:0016020	membrane	NA	NA	0.0137898	CC
GO:0030117	membrane coat	NA	NA	0.0471014	CC
GO:0044425	membrane part	NA	NA	0.00627001	CC
GO:0048475	coated membrane	NA	NA	0.0471014	CC
GO:0003824	catalytic activity	0.000502289	NA	5.18e-08	MF
GO:0004672	protein kinase activity	0.022509	NA	0.00637213	MF
GO:0005524	ATP binding	0.00712132	NA	0.000224642	MF
GO:0008144	drug binding	0.034981	NA	0.0130252	MF
GO:0016740	transferase activity	0.00204897	NA	0.000747448	MF
GO:0016772	transferase activity, transferring phosphorus-containing groups	0.0201377	NA	0.0377261	MF
GO:0016773	phosphotransferase activity, alcohol group as acceptor	0.0250091	NA	0.000769778	MF
GO:0016788	hydrolase activity, acting on ester bonds	0.016634	NA	0.00100384	MF
GO:0030554	adenyl nucleotide binding	0.00615713	NA	0.000203032	MF
GO:0032559	adenyl ribonucleotide binding	0.00615713	NA	0.000203032	MF
GO:0043168	anion binding	0.0419734	NA	0.00858171	MF
GO:0140098	catalytic activity, acting on RNA	0.00165546	NA	0.0452577	MF
GO:0016787	hydrolase activity	NA	NA	0.000858751	MF
GO:0017076	purine nucleotide binding	NA	NA	0.00253232	MF
GO:0032553	ribonucleotide binding	NA	NA	0.00201149	MF
GO:0032555	purine ribonucleotide binding	NA	NA	0.00253232	MF
GO:0035639	purine ribonucleoside triphosphate binding	NA	NA	0.00273231	MF
GO:0042578	phosphoric ester hydrolase activity	NA	NA	0.0397377	MF
GO:0097367	carbohydrate derivative binding	NA	NA	0.0017221	MF
GO:0004812	aminoacyl-tRNA ligase activity	0.0224304	NA	NA	MF
GO:0006399	tRNA metabolic process	0.0210713	NA	NA	BP
GO:0006418	tRNA aminoacylation for protein translation	0.0284427	NA	NA	BP
GO:0006520	cellular amino acid metabolic process	0.0313967	NA	NA	BP
GO:0009889	regulation of biosynthetic process	0.0466119	NA	NA	BP
GO:0010556	regulation of macromolecule biosynthetic process	0.0466119	NA	NA	BP
GO:0016070	RNA metabolic process	0.000775131	NA	NA	BP
GO:0016875	ligase activity, forming carbon-oxygen bonds	0.0224304	NA	NA	MF
GO:0031323	regulation of cellular metabolic process	0.0173623	NA	NA	BP
GO:0031326	regulation of cellular biosynthetic process	0.0466119	NA	NA	BP
GO:0034660	ncRNA metabolic process	0.00617034	NA	NA	BP
GO:0043038	amino acid activation	0.0284427	NA	NA	BP
GO:0043039	tRNA aminoacylation	0.0284427	NA	NA	BP
GO:0051536	iron-sulfur cluster binding	0.0224304	NA	NA	MF
GO:0051540	metal cluster binding	0.0224304	NA	NA	MF
GO:0090304	nucleic acid metabolic process	0.000319418	NA	NA	BP
GO:0140101	catalytic activity, acting on a tRNA	0.0118656	NA	NA	MF
GO:2000112	regulation of cellular macromolecule biosynthetic process	0.0466119	NA	NA	BP
GO:0036094	small molecule binding	NA	0.0474829	NA	MF
GO:0006468	protein phosphorylation	0.0326583	NA	0.00748783	BP
GO:0005975	carbohydrate metabolic process	NA	NA	0.000832933	BP
GO:0006464	cellular protein modification process	NA	NA	0.0368827	BP
GO:0006793	phosphorus metabolic process	NA	NA	0.0477845	BP
GO:0006886	intracellular protein transport	NA	NA	0.0182882	BP
GO:0008104	protein localization	NA	NA	0.0425994	BP
GO:0016310	phosphorylation	NA	NA	0.0262667	BP
GO:0033036	macromolecule localization	NA	NA	0.0248927	BP
GO:0034613	cellular protein localization	NA	NA	0.0109877	BP
GO:0036211	protein modification process	NA	NA	0.0368827	BP
GO:0043412	macromolecule modification	NA	NA	0.0368827	BP
GO:0046907	intracellular transport	NA	NA	0.0383005	BP
GO:0051649	establishment of localization in cell	NA	NA	0.0309095	BP
GO:0055114	oxidation-reduction process	NA	NA	0.0370085	BP
GO:0070727	cellular macromolecule localization	NA	NA	0.0109877	BP
GO:0071702	organic substance transport	NA	NA	0.0344164	BP
