# Supplementary material for: Combined transcriptome and proteome profiling reveals specific molecular brain signatures for sex, maturation and circalunar clock phase
Source: eLife. 2019 Feb 15;8:e41556. doi: 10.7554/eLife.41556 (PMC6377233; doi:10.7554/eLife.41556)
Supplement: Figure 5—source data 11. — This file contains the over- and under-representet GO-terms for the maturation comparison on protein level. Tabs for each of the three ontologies, i.e. Molecular Function, Biological Process, and Cellular Compartment. [file elife-41556-fig5-data11.xlsx]

## Sheet: MF_OVER
GOMFID	Pvalue	OddsRatio	ExpCount	Count	Size	Term	test	ontology	subset
GO:0005509	0.00238	1.7746	36.5233	51	119	calcium ion binding	over	MF	allMat
GO:0016853	0.0025531	3.02352	9.20755	17	30	isomerase activity	over	MF	allMat
GO:0046982	0.00423336	13.7054	2.14843	6	7	protein heterodimerization activity	over	MF	allMat
GO:0005198	0.0104711	1.816	22.405	32	73	structural molecule activity	over	MF	allMat
GO:0008234	0.0111048	2.68284	7.97987	14	26	cysteine-type peptidase activity	over	MF	allMat
GO:0003755	0.0279621	4.56017	2.76226	6	9	peptidyl-prolyl cis-trans isomerase activity	over	MF	allMat
GO:0019843	0.0287881	Inf	0.920755	3	3	rRNA binding	over	MF	allMat
GO:0015078	0.0302772	2.51824	6.44528	11	21	proton transmembrane transporter activity	over	MF	allMat
GO:0004198	0.0314807	5.69358	2.14843	5	7	calcium-dependent cysteine-type endopeptidase activity	over	MF	allMat
GO:0005488	0.0324065	1.25778	340.986	357	1111	binding	over	MF	allMat
GO:0003774	0.0353208	3.04444	4.29686	8	14	motor activity	over	MF	allMat
GO:0003779	0.041549	2.12692	8.28679	13	27	actin binding	over	MF	allMat
GO:0051082	0.0442615	2.28721	6.7522	11	22	unfolded protein binding	over	MF	allMat

## Sheet: BP_OVER
GOBPID	Pvalue	OddsRatio	ExpCount	Count	Size	Term	test	ontology	subset
GO:0009142	2.58188e-05	8.76174	5.28814	14	18	nucleoside triphosphate biosynthetic process	over	BP	allMat
GO:0009206	2.58188e-05	8.76174	5.28814	14	18	purine ribonucleoside triphosphate biosynthetic process	over	BP	allMat
GO:0009199	2.6137e-05	6.11671	7.05085	17	24	ribonucleoside triphosphate metabolic process	over	BP	allMat
GO:0009144	2.6137e-05	6.11671	7.05085	17	24	purine nucleoside triphosphate metabolic process	over	BP	allMat
GO:0009168	7.21618e-05	7	5.58192	14	19	purine ribonucleoside monophosphate biosynthetic process	over	BP	allMat
GO:0006163	8.02995e-05	4.21233	9.40113	20	32	purine nucleotide metabolic process	over	BP	allMat
GO:0009126	0.000144744	5.01351	7.05085	16	24	purine nucleoside monophosphate metabolic process	over	BP	allMat
GO:0046034	0.000161887	5.36075	6.46328	15	22	ATP metabolic process	over	BP	allMat
GO:0009152	0.000161887	5.36075	6.46328	15	22	purine ribonucleotide biosynthetic process	over	BP	allMat
GO:0009259	0.000213331	4.11317	8.51977	18	29	ribonucleotide metabolic process	over	BP	allMat
GO:0046390	0.000342288	4.68434	6.75706	15	23	ribose phosphate biosynthetic process	over	BP	allMat
GO:0009124	0.000390828	4.98658	6.16949	14	21	nucleoside monophosphate biosynthetic process	over	BP	allMat
GO:0009161	0.000564732	4	7.63842	16	26	ribonucleoside monophosphate metabolic process	over	BP	allMat
GO:0072522	0.00101933	3.63145	7.9322	16	27	purine-containing compound biosynthetic process	over	BP	allMat
GO:0072524	0.00118906	5.44518	4.70056	11	16	pyridine-containing compound metabolic process	over	BP	allMat
GO:0006165	0.00129678	9.84211	2.93785	8	10	nucleoside diphosphate phosphorylation	over	BP	allMat
GO:0007160	0.00129678	9.84211	2.93785	8	10	cell-matrix adhesion	over	BP	allMat
GO:0006733	0.00288261	4.93377	4.40678	10	15	oxidoreduction coenzyme metabolic process	over	BP	allMat
GO:0046496	0.00288261	4.93377	4.40678	10	15	nicotinamide nucleotide metabolic process	over	BP	allMat
GO:0006090	0.00325591	5.5396	3.81921	9	13	pyruvate metabolic process	over	BP	allMat
GO:0046031	0.00362276	8.58361	2.64407	7	9	ADP metabolic process	over	BP	allMat
GO:0009185	0.00362276	8.58361	2.64407	7	9	ribonucleoside diphosphate metabolic process	over	BP	allMat
GO:0006096	0.00362276	8.58361	2.64407	7	9	glycolytic process	over	BP	allMat
GO:0009135	0.00362276	8.58361	2.64407	7	9	purine nucleoside diphosphate metabolic process	over	BP	allMat
GO:1901135	0.00481569	2.07622	18.2147	28	62	carbohydrate derivative metabolic process	over	BP	allMat
GO:1901292	0.00793821	4.90789	3.52542	8	12	nucleoside phosphate catabolic process	over	BP	allMat
GO:0046700	0.00793821	4.90789	3.52542	8	12	heterocycle catabolic process	over	BP	allMat
GO:0044270	0.00793821	4.90789	3.52542	8	12	cellular nitrogen compound catabolic process	over	BP	allMat
GO:0019363	0.00793821	4.90789	3.52542	8	12	pyridine nucleotide biosynthetic process	over	BP	allMat
GO:0018193	0.00905003	5.71475	2.93785	7	10	peptidyl-amino acid modification	over	BP	allMat
GO:0072330	0.00905003	5.71475	2.93785	7	10	monocarboxylic acid biosynthetic process	over	BP	allMat
GO:0015986	0.00984816	7.33333	2.35028	6	8	ATP synthesis coupled proton transport	over	BP	allMat
GO:0006753	0.00990854	2.39566	10.1333	17	35	nucleoside phosphate metabolic process	over	BP	allMat
GO:0006091	0.0135989	2.67391	7.34463	13	25	generation of precursor metabolites and energy	over	BP	allMat
GO:0019439	0.0154299	3.92105	3.81921	8	13	aromatic compound catabolic process	over	BP	allMat
GO:1901361	0.0154299	3.92105	3.81921	8	13	organic cyclic compound catabolic process	over	BP	allMat
GO:0071824	0.0186845	4.28033	3.23164	7	11	protein-DNA complex subunit organization	over	BP	allMat
GO:0006323	0.0186845	4.28033	3.23164	7	11	DNA packaging	over	BP	allMat
GO:0006333	0.0186845	4.28033	3.23164	7	11	chromatin assembly or disassembly	over	BP	allMat
GO:0006334	0.0186845	4.28033	3.23164	7	11	nucleosome assembly	over	BP	allMat
GO:0005975	0.0190285	1.86979	16.452	24	56	carbohydrate metabolic process	over	BP	allMat
GO:0007264	0.0202784	2.1982	9.9887	16	34	small GTPase mediated signal transduction	over	BP	allMat
GO:0000413	0.022299	4.88235	2.64407	6	9	protein peptidyl-prolyl isomerization	over	BP	allMat
GO:0006006	0.0281851	9.72727	1.46893	4	5	glucose metabolic process	over	BP	allMat
GO:1902600	0.0342061	2.75495	4.99435	9	17	proton transmembrane transport	over	BP	allMat
GO:0006508	0.0386135	1.52763	27.9096	36	95	proteolysis	over	BP	allMat

## Sheet: CC_OVER
GOCCID	Pvalue	OddsRatio	ExpCount	Count	Size	Term	test	ontology	subset
GO:0043232	0.000243419	2.1389	40.2604	57	121	intracellular non-membrane-bounded organelle	over	CC	allMat
GO:0044422	0.00250616	1.83627	42.2568	56	127	organelle part	over	CC	allMat
GO:0044430	0.0027362	2.64815	13.3092	22	40	cytoskeletal part	over	CC	allMat
GO:0015629	0.00516902	3.29412	7.6528	14	23	actin cytoskeleton	over	CC	allMat
GO:0005740	0.00761794	4.18391	4.99096	10	15	mitochondrial envelope	over	CC	allMat
GO:0005743	0.00813496	5.54545	3.66004	8	11	mitochondrial inner membrane	over	CC	allMat
GO:0005739	0.00877471	2.95647	7.98553	14	24	mitochondrion	over	CC	allMat
GO:0005622	0.0101525	1.63003	127.769	140	384	intracellular	over	CC	allMat
GO:0000786	0.0160366	3.744	4.65823	9	14	nucleosome	over	CC	allMat
GO:0045259	0.0171673	10.2793	1.99638	5	6	proton-transporting ATP synthase complex	over	CC	allMat
GO:0098798	0.0171673	10.2793	1.99638	5	6	mitochondrial protein complex	over	CC	allMat
GO:0005783	0.0188919	2.7907	6.98734	12	21	endoplasmic reticulum	over	CC	allMat
GO:0000276	0.0364355	Inf	0.998192	3	3	mitochondrial proton-transporting ATP synthase complex, coupling factor F(o)	over	CC	allMat
GO:0044455	0.0438813	5.1257	2.32911	5	7	mitochondrial membrane part	over	CC	allMat
GO:0005623	0.0438953	1.4546	133.092	142	400	cell	over	CC	allMat
GO:0043229	0.0482481	1.51513	33.5139	41	114	intracellular organelle	over	CC	allMat

## Sheet: MF_under
GOMFID	Pvalue	OddsRatio	ExpCount	Count	Size	Term	test	ontology	subset
GO:0003824	0.000502289	0.692643	225.585	195	735	catalytic activity	under	MF	allMat
GO:0140098	0.00165546	0.0963307	7.36604	1	24	catalytic activity, acting on RNA	under	MF	allMat
GO:0016740	0.00204897	0.567764	51.2553	35	167	transferase activity	under	MF	allMat
GO:0030554	0.00615713	0.601574	47.8792	34	156	adenyl nucleotide binding	under	MF	allMat
GO:0032559	0.00615713	0.601574	47.8792	34	156	adenyl ribonucleotide binding	under	MF	allMat
GO:0005524	0.00712132	0.607165	47.5723	34	155	ATP binding	under	MF	allMat
GO:0140101	0.0118656	0.131054	5.52453	1	18	catalytic activity, acting on a tRNA	under	MF	allMat
GO:0016788	0.016634	0.451794	16.2667	9	53	hydrolase activity, acting on ester bonds	under	MF	allMat
GO:0016772	0.0201377	0.541192	23.3258	15	76	transferase activity, transferring phosphorus-containing groups	under	MF	allMat
GO:0051540	0.0224304	0.148802	4.91069	1	16	metal cluster binding	under	MF	allMat
GO:0051536	0.0224304	0.148802	4.91069	1	16	iron-sulfur cluster binding	under	MF	allMat
GO:0004812	0.0224304	0.148802	4.91069	1	16	aminoacyl-tRNA ligase activity	under	MF	allMat
GO:0016875	0.0224304	0.148802	4.91069	1	16	ligase activity, forming carbon-oxygen bonds	under	MF	allMat
GO:0004672	0.022509	0.403244	11.9698	6	39	protein kinase activity	under	MF	allMat
GO:0016773	0.0250091	0.491399	16.8805	10	55	phosphotransferase activity, alcohol group as acceptor	under	MF	allMat
GO:0008144	0.034981	0.715126	57.0868	46	186	drug binding	under	MF	allMat
GO:0043168	0.0419734	0.768255	86.5509	74	282	anion binding	under	MF	allMat

## Sheet: BP_under
GOBPID	Pvalue	OddsRatio	ExpCount	Count	Size	Term	test	ontology	subset
GO:0090304	0.000319418	0.3321	22.9153	10	78	nucleic acid metabolic process	under	BP	allMat
GO:0016070	0.000775131	0.301825	17.6271	7	60	RNA metabolic process	under	BP	allMat
GO:0034660	0.00617034	0.117363	6.16949	1	21	ncRNA metabolic process	under	BP	allMat
GO:0031323	0.0173623	0.281553	8.22599	3	28	regulation of cellular metabolic process	under	BP	allMat
GO:0006399	0.0210713	0.147508	4.99435	1	17	tRNA metabolic process	under	BP	allMat
GO:0006418	0.0284427	0.157556	4.70056	1	16	tRNA aminoacylation for protein translation	under	BP	allMat
GO:0043038	0.0284427	0.157556	4.70056	1	16	amino acid activation	under	BP	allMat
GO:0043039	0.0284427	0.157556	4.70056	1	16	tRNA aminoacylation	under	BP	allMat
GO:0006520	0.0313967	0.488372	15.2768	9	52	cellular amino acid metabolic process	under	BP	allMat
GO:0006468	0.0326583	0.426025	11.4576	6	39	protein phosphorylation	under	BP	allMat
GO:0031326	0.0466119	0.337032	7.05085	3	24	regulation of cellular biosynthetic process	under	BP	allMat
GO:2000112	0.0466119	0.337032	7.05085	3	24	regulation of cellular macromolecule biosynthetic process	under	BP	allMat
GO:0010556	0.0466119	0.337032	7.05085	3	24	regulation of macromolecule biosynthetic process	under	BP	allMat
GO:0009889	0.0466119	0.337032	7.05085	3	24	regulation of biosynthetic process	under	BP	allMat

## Sheet: CC_under
GOCCID	Pvalue	OddsRatio	ExpCount	Count	Size	Term	test	ontology	subset
GO:0044428	0.000596868	0	5.98915	0	18	nuclear part	under	CC	allMat
GO:0031224	0.0295019	0.569737	25.6203	18	77	intrinsic component of membrane	under	CC	allMat
GO:0016021	0.0353351	0.581429	25.2875	18	76	integral component of membrane	under	CC	allMat
