# Supplementary material for: Combined transcriptome and proteome profiling reveals specific molecular brain signatures for sex, maturation and circalunar clock phase
Source: eLife. 2019 Feb 15;8:e41556. doi: 10.7554/eLife.41556 (PMC6377233; doi:10.7554/eLife.41556)
Supplement: Figure 5—source data 12. — This file contains the over- and under-representet GO-terms for the sex comparison on protein level. Tabs for each of the three ontologies, i.e. Molecular Function, Biological Process, and Cellular Compartment. [file elife-41556-fig5-data12.xlsx]

## Sheet: MF_OVER
GOMFID	Pvalue	OddsRatio	ExpCount	Count	Size	Term	test	ontology	subset
GO:0019825	0.00267757	35.6591	0.081761	2	10	oxygen binding	over	MF	allSex
GO:0008199	0.0162905	131.333	0.0163522	1	2	ferric iron binding	over	MF	allSex
GO:0020037	0.0193076	11.2873	0.220755	2	27	heme binding	over	MF	allSex
GO:0016714	0.0243435	65.625	0.0245283	1	3	oxidoreductase activity, acting on paired donors, with incorporation or reduction of molecular oxygen, reduced pteridine as one donor, and incorporation of one atom of oxygen	over	MF	allSex
GO:0005319	0.0323356	43.7222	0.0327044	1	4	lipid transporter activity	over	MF	allSex
GO:0004089	0.0323356	43.7222	0.0327044	1	4	carbonate dehydratase activity	over	MF	allSex

## Sheet: BP_OVER
GOBPID	Pvalue	OddsRatio	ExpCount	Count	Size	Term	test	ontology	subset
GO:0055076	0.0131454	175.667	0.0131827	1	2	transition metal ion homeostasis	over	BP	allSex
GO:0006879	0.0131454	175.667	0.0131827	1	2	cellular iron ion homeostasis	over	BP	allSex
GO:0006826	0.0131454	175.667	0.0131827	1	2	iron ion transport	over	BP	allSex
GO:0055080	0.0196624	87.75	0.019774	1	3	cation homeostasis	over	BP	allSex
GO:0006873	0.0196624	87.75	0.019774	1	3	cellular ion homeostasis	over	BP	allSex
GO:0006875	0.0196624	87.75	0.019774	1	3	cellular metal ion homeostasis	over	BP	allSex
GO:0098771	0.0196624	87.75	0.019774	1	3	inorganic ion homeostasis	over	BP	allSex
GO:0006869	0.0325857	43.7917	0.0329567	1	5	lipid transport	over	BP	allSex
GO:0006811	0.0349356	8.97778	0.309793	2	47	ion transport	over	BP	allSex
GO:0006730	0.0389924	35	0.039548	1	6	one-carbon metabolic process	over	BP	allSex
GO:0048878	0.0389924	35	0.039548	1	6	chemical homeostasis	over	BP	allSex

## Sheet: CC_OVER
GOCCID	Pvalue	OddsRatio	ExpCount	Count	Size	Term	test	ontology	subset

## Sheet: MF_under
GOMFID	Pvalue	OddsRatio	ExpCount	Count	Size	Term	test	ontology	subset
GO:0036094	0.0474829	0	2.70629	0	331	small molecule binding	under	MF	allSex

## Sheet: BP_under
GOBPID	Pvalue	OddsRatio	ExpCount	Count	Size	Term	test	ontology	subset

## Sheet: CC_under
GOCCID	Pvalue	OddsRatio	ExpCount	Count	Size	Term	test	ontology	subset
