# Supplementary material for: Combined transcriptome and proteome profiling reveals specific molecular brain signatures for sex, maturation and circalunar clock phase
Source: eLife. 2019 Feb 15;8:e41556. doi: 10.7554/eLife.41556 (PMC6377233; doi:10.7554/eLife.41556)
Supplement: Figure 5—source data 13. — This file contains the over- and under-representet GO-terms for the lunar comparison on protein level. Tabs for each of the three ontologies, i.e. Molecular Function, Biological Process, and Cellular Compartment. [file elife-41556-fig5-data13.xlsx]

## Sheet: MF_OVER
GOMFID	Pvalue	OddsRatio	ExpCount	Count	Size	Term	test	ontology	subset
GO:0003735	1.98041e-08	6.27712	5.76604	21	48	structural constituent of ribosome	over	MF	allLun
GO:0005509	0.000188	2.46909	14.295	28	119	calcium ion binding	over	MF	allLun
GO:0046982	0.000408273	18.7769	0.840881	5	7	protein heterodimerization activity	over	MF	allLun
GO:0003755	0.00199679	9.375	1.08113	5	9	peptidyl-prolyl cis-trans isomerase activity	over	MF	allLun
GO:0019825	0.00360723	7.49462	1.20126	5	10	oxygen binding	over	MF	allLun
GO:0015078	0.00860152	3.76359	2.52264	7	21	proton transmembrane transporter activity	over	MF	allLun
GO:0003676	0.0181833	1.61526	22.4635	32	187	nucleic acid binding	over	MF	allLun
GO:0016776	0.025909	7.42553	0.720755	3	6	phosphotransferase activity, phosphate group as acceptor	over	MF	allLun
GO:0046983	0.0380227	15.1739	0.352495	2	3	protein dimerization activity	over	MF	allLun
GO:0016646	0.039672	14.7937	0.360377	2	3	oxidoreductase activity, acting on the CH-NH group of donors, NAD or NADP as acceptor	over	MF	allLun
GO:0019205	0.0413869	5.56516	0.840881	3	7	nucleobase-containing compound kinase activity	over	MF	allLun

## Sheet: BP_OVER
GOBPID	Pvalue	OddsRatio	ExpCount	Count	Size	Term	test	ontology	subset
GO:0043604	3.0474e-06	3.6718	9.96045	25	86	amide biosynthetic process	over	BP	allLun
GO:0006412	4.37868e-06	3.68234	9.49718	24	82	translation	over	BP	allLun
GO:0006518	2.14402e-05	3.25967	10.3079	24	89	peptide metabolic process	over	BP	allLun
GO:0009059	2.22282e-05	2.91028	13.7825	29	119	macromolecule biosynthetic process	over	BP	allLun
GO:1901566	0.000163106	2.42312	17.4887	32	151	organonitrogen compound biosynthetic process	over	BP	allLun
GO:0034641	0.000904015	2.0045	25.7119	40	222	cellular nitrogen compound metabolic process	over	BP	allLun
GO:0044249	0.00124978	2.01466	22.7006	36	196	cellular biosynthetic process	over	BP	allLun
GO:0000413	0.00165415	9.90466	1.04237	5	9	protein peptidyl-prolyl isomerization	over	BP	allLun
GO:0018193	0.00300329	7.91525	1.15819	5	10	peptidyl-amino acid modification	over	BP	allLun
GO:0007160	0.00300329	7.91525	1.15819	5	10	cell-matrix adhesion	over	BP	allLun
GO:0071824	0.00499964	6.58898	1.27401	5	11	protein-DNA complex subunit organization	over	BP	allLun
GO:0006323	0.00499964	6.58898	1.27401	5	11	DNA packaging	over	BP	allLun
GO:0006333	0.00499964	6.58898	1.27401	5	11	chromatin assembly or disassembly	over	BP	allLun
GO:0006334	0.00499964	6.58898	1.27401	5	11	nucleosome assembly	over	BP	allLun
GO:0007155	0.00609715	4.08407	2.38411	7	21	cell adhesion	over	BP	allLun
GO:0098609	0.0127345	11.7125	0.579096	3	5	cell-cell adhesion	over	BP	allLun
GO:0007156	0.0127345	11.7125	0.579096	3	5	homophilic cell adhesion via plasma membrane adhesion molecules	over	BP	allLun
GO:0050793	0.0133176	Inf	0.231638	2	2	regulation of developmental process	over	BP	allLun
GO:0044260	0.0160236	1.62086	27.9124	38	241	cellular macromolecule metabolic process	over	BP	allLun
GO:0019538	0.0215793	1.55921	31.1554	41	269	protein metabolic process	over	BP	allLun
GO:0030042	0.0233284	7.8	0.694915	3	6	actin filament depolymerization	over	BP	allLun
GO:0006904	0.0369123	15.5041	0.347458	2	3	vesicle docking involved in exocytosis	over	BP	allLun
GO:0140056	0.0369123	15.5041	0.347458	2	3	organelle localization by membrane tethering	over	BP	allLun
GO:0030031	0.0369123	15.5041	0.347458	2	3	cell projection assembly	over	BP	allLun
GO:1902600	0.0377489	3.27331	1.96893	5	17	proton transmembrane transport	over	BP	allLun
GO:0009141	0.0496163	2.62393	2.77966	6	24	nucleoside triphosphate metabolic process	over	BP	allLun
GO:0009205	0.0496163	2.62393	2.77966	6	24	purine ribonucleoside triphosphate metabolic process	over	BP	allLun

## Sheet: CC_OVER
GOCCID	Pvalue	OddsRatio	ExpCount	Count	Size	Term	test	ontology	subset
GO:0005840	6.37223e-07	5.35938	7.37794	21	48	ribosome	over	CC	allLun
GO:0043228	8.98388e-06	3.1093	18.5986	35	121	non-membrane-bounded organelle	over	CC	allLun
GO:0043229	0.000751651	2.18533	36.1212	50	235	intracellular organelle	over	CC	allLun
GO:0000786	0.00220754	5.91026	2.1519	7	14	nucleosome	over	CC	allLun
GO:0032991	0.00775696	1.82823	32.4322	43	211	protein-containing complex	over	CC	allLun
GO:0005694	0.0167293	3.41026	2.92043	7	19	chromosome	over	CC	allLun
GO:0005623	0.0293861	1.78493	61.4828	69	400	cell	over	CC	allLun
GO:0005622	0.0463035	1.63853	59.0235	66	384	intracellular	over	CC	allLun

## Sheet: MF_under
GOMFID	Pvalue	OddsRatio	ExpCount	Count	Size	Term	test	ontology	subset
GO:0003824	5.18153e-08	0.415576	88.2925	54	735	catalytic activity	under	MF	allLun
GO:0030554	0.000203032	0.270054	18.7396	6	156	adenyl nucleotide binding	under	MF	allLun
GO:0032559	0.000203032	0.270054	18.7396	6	156	adenyl ribonucleotide binding	under	MF	allLun
GO:0005524	0.000224642	0.272084	18.6195	6	155	ATP binding	under	MF	allLun
GO:0016740	0.000747448	0.340929	20.061	8	167	transferase activity	under	MF	allLun
GO:0016773	0.000769778	0	6.60692	0	55	phosphotransferase activity, alcohol group as acceptor	under	MF	allLun
GO:0016787	0.000858751	0.462338	33.0346	18	275	hydrolase activity	under	MF	allLun
GO:0016788	0.00100384	0	6.36667	0	53	hydrolase activity, acting on ester bonds	under	MF	allLun
GO:0097367	0.00172209	0.447834	26.9082	14	224	carbohydrate derivative binding	under	MF	allLun
GO:0032553	0.00201149	0.452901	26.6679	14	222	ribonucleotide binding	under	MF	allLun
GO:0017076	0.00253232	0.460686	26.3075	14	219	purine nucleotide binding	under	MF	allLun
GO:0032555	0.00253232	0.460686	26.3075	14	219	purine ribonucleotide binding	under	MF	allLun
GO:0035639	0.00273231	0.463332	26.1874	14	218	purine ribonucleoside triphosphate binding	under	MF	allLun
GO:0004672	0.00637213	0	4.68491	0	39	protein kinase activity	under	MF	allLun
GO:0043168	0.00858171	0.570278	33.8755	22	282	anion binding	under	MF	allLun
GO:0008144	0.0130252	0.517568	22.3434	13	186	drug binding	under	MF	allLun
GO:0016772	0.0377261	0.394236	9.12956	4	76	transferase activity, transferring phosphorus-containing groups	under	MF	allLun
GO:0042578	0.0397377	0	3.00314	0	25	phosphoric ester hydrolase activity	under	MF	allLun
GO:0140098	0.0452577	0	2.88302	0	24	catalytic activity, acting on RNA	under	MF	allLun

## Sheet: BP_under
GOBPID	Pvalue	OddsRatio	ExpCount	Count	Size	Term	test	ontology	subset
GO:0005975	0.000832933	0	6.48588	0	56	carbohydrate metabolic process	under	BP	allLun
GO:0006468	0.00748783	0	4.51695	0	39	protein phosphorylation	under	BP	allLun
GO:0070727	0.0109877	0	4.16949	0	36	cellular macromolecule localization	under	BP	allLun
GO:0034613	0.0109877	0	4.16949	0	36	cellular protein localization	under	BP	allLun
GO:0006886	0.0182882	0	3.70621	0	32	intracellular protein transport	under	BP	allLun
GO:0033036	0.0248927	0.166729	5.21186	1	45	macromolecule localization	under	BP	allLun
GO:0016310	0.0262667	0.260626	6.71751	2	58	phosphorylation	under	BP	allLun
GO:0051649	0.0309095	0.175059	4.98023	1	43	establishment of localization in cell	under	BP	allLun
GO:0071702	0.0344164	0.179528	4.86441	1	42	organic substance transport	under	BP	allLun
GO:0043412	0.0368827	0.425723	10.4237	5	90	macromolecule modification	under	BP	allLun
GO:0036211	0.0368827	0.425723	10.4237	5	90	protein modification process	under	BP	allLun
GO:0006464	0.0368827	0.425723	10.4237	5	90	cellular protein modification process	under	BP	allLun
GO:0055114	0.0370085	0.546703	17.8362	11	154	oxidation-reduction process	under	BP	allLun
GO:0046907	0.0383005	0.184221	4.74859	1	41	intracellular transport	under	BP	allLun
GO:0008104	0.0425994	0.189155	4.63277	1	40	protein localization	under	BP	allLun
GO:0006793	0.0477845	0.518919	13.7825	8	119	phosphorus metabolic process	under	BP	allLun

## Sheet: CC_under
GOCCID	Pvalue	OddsRatio	ExpCount	Count	Size	Term	test	ontology	subset
GO:0031224	0.00324998	0.267208	11.8354	4	77	intrinsic component of membrane	under	CC	allLun
GO:0016021	0.00372878	0.271605	11.6817	4	76	integral component of membrane	under	CC	allLun
GO:0044425	0.00627001	0.418879	18.906	10	123	membrane part	under	CC	allLun
GO:0016020	0.0137898	0.539367	29.2043	20	190	membrane	under	CC	allLun
GO:0048475	0.0471014	0	2.76673	0	18	coated membrane	under	CC	allLun
GO:0030117	0.0471014	0	2.76673	0	18	membrane coat	under	CC	allLun
GO:0044428	0.0471014	0	2.76673	0	18	nuclear part	under	CC	allLun
