# Supplementary material for: Combined transcriptome and proteome profiling reveals specific molecular brain signatures for sex, maturation and circalunar clock phase
Source: eLife. 2019 Feb 15;8:e41556. doi: 10.7554/eLife.41556 (PMC6377233; doi:10.7554/eLife.41556)
Supplement: Figure 5—source data 14. — Table contataining protein intensities and calculation of the normalised intensities for both, all 2,092 detected proteins and the BR and TR filtered final list containing 1,671 proteins used for DEP prediction from the lunar proteome repetion experiment. [file elife-41556-fig5-data14.xlsx]

## Sheet: all identified prot_wAbundVal
median per channel		628.05	585.25	613.9	652	610.3	635.4	606.1	578.4	594.3	649.15	618.75	652.8	594.7	576.6	597.8	600.45	571.7	587.2	506.125	515.733	495.2	544.667	493.767	481.792	Channel Norm
																										Mean, corr
Protein ID	# Unique Peptides	Abundance: rep1: FRFM-291	Abundance: rep2: FRFM-291	Abundance: rep3: FRFM-291	Abundance: rep1: FRFM-293	Abundance: rep2: FRFM-293	Abundance: rep3: FRFM-293	Abundance: rep1: FRFM-294	Abundance: rep2: FRFM-294	Abundance: rep3: FRFM-294	Abundance: rep1: NM-287	Abundance: rep2: NM-287	Abundance: rep3: NM-287	Abundance: rep1: NM-289	Abundance: rep2: NM-289	Abundance: rep3: NM-289	Abundance: rep1: NM-290	Abundance: rep2: NM-290	Abundance: rep3: NM-290	FRFM_126	FRFM_127	FRFM_128	NM_129	NM_130	NM_131	FRFM_126	FRFM_127	FRFM_128	NM_129	NM_130	NM_131	Identifed in x tech rep	Quantified in x tech rep
comp2225664_c0_seq1|m.20382	18	40523.9	46173.8	45197.8	29549.8	33128.6	30415.4	31130.5	34526.3	31770.8	29782.7	32622.9	30657.8	34880.1	38302.3	35802.4	32093.4	35851.8	33206.2	43965.2	31031.3	32475.9	31021.1	36328.3	33717.1	86.8662	60.1692	65.5813	56.9543	73.5738	69.9828	3	3
comp2257070_c0_seq2|m.47512	75	32155.6	27630.2	28461.6	24260.5	21149.6	21946	31565.9	27098.1	27929.8	34707.1	30405.1	31265.7	35501.9	30736.8	31481	29379.3	25215.5	25925.3	29415.8	22452	28864.6	32126	32573.2	26840	58.1196	43.5342	58.2888	58.9828	65.9689	55.7088	3	3
comp2278587_c0_seq14|m.90327	209	30106.9	29710	27521.3	26561.9	26188	24122.4	28204.4	27876.1	25677.2	29780.6	28962.2	26322.7	29319.6	28520	26021.3	28725.6	28269.3	26041.9	29112.7	25624.1	27252.6	28355.2	27953.6	27678.9	57.5208	49.6848	55.0335	52.0597	56.613	57.45	3	3
comp2274909_c0_seq7|m.78613	130	27399.9	26682	26541.3	19713.5	18817.1	18408.8	28796.2	27265.5	26784.1	35253.3	32938.7	32300.3	45909.2	42663.2	42184.2	30117.4	28453.6	27855.5	26874.4	18979.8	27615.3	33497.4	43585.5	28808.8	53.0983	36.8016	55.7659	61.5008	88.2715	59.7952	3	3
comp2271225_c0_seq5|m.70641	18	21952.7	21851.9	23589.2	17072.9	17482.9	18290.5	18325.4	18814.3	19884.2	17217.5	17685.4	19653.6	17841.9	18331.7	19698.2	18509	19054.4	19879.8	22464.6	17615.4	19008	18185.5	18623.9	19147.7	44.3855	34.1561	38.3844	33.3883	37.7181	39.7428	3	3
comp2273038_c0_seq3|m.74522	57	18979.9	23407.7	21488	15993.8	19702.6	17528.2	16707.1	20668.7	18625.7	15622.4	19876.4	18318.5	16811.6	21021.7	19218	16930.2	20941.7	18881.5	21291.9	17741.5	18667.2	17939.1	19017.1	18917.8	42.0684	34.4006	37.6962	32.9359	38.5143	39.2655	3	3
comp2261623_c0_seq1|m.54431	36	22272.2	18936.2	19820.7	16994.6	15838	15571.5	17529.4	16473.3	15796.5	19296.5	17660.6	16501.1	18810	17986	16734.2	17895.1	17283.9	16236.7	20343	16134.7	16599.7	17819.4	17843.4	17138.6	40.1937	31.285	33.5213	32.7162	36.1373	35.5726	3	3
comp2278405_c0_seq22|m.88893	117	17449.4	19890.6	18236.4	13142.1	15144.9	13863.2	15935.3	18254.3	16577.2	17390.1	19975.2	17945.3	18954.1	21280.4	19338.2	16555.7	18894.1	17158.9	18525.5	14050.1	16922.3	18436.9	19857.6	17536.2	36.6026	27.2429	34.1726	33.8498	40.2165	36.398	3	3
comp2278378_c0_seq4|m.88778	95	17651.3	18188.4	17830.1	13916.5	14993.9	14174	16339.2	17211.8	16459	17828.9	19303.7	18124.2	17649.2	18394.6	17669.6	17036.8	17933.6	17101.7	17889.9	14361.5	16670	18418.9	17904.5	17357.4	35.3469	27.8467	33.6632	33.8169	36.261	36.0267	3	3
comp2272691_c0_seq4|m.73750	96	15618.1	17433.1	18244.8	11425.7	12338.4	13260	15169.7	16678.7	17662	17278.8	19495.4	20594.9	18750.9	20886.5	22406.9	15527	17054.4	17852.6	17098.7	12341.4	16503.5	19123	20681.4	16811.3	33.7835	23.9297	33.3269	35.1096	41.885	34.8934	3	3
comp2261379_c0_seq1|m.54133	18	15686	17299.9	16544.8	12705.2	14081.4	13766.7	13219.6	14841.5	14302.8	10443.1	11385.7	10228.6	13548.2	14827	14244	14015	15774.3	15195.2	16510.2	13517.8	14121.3	10685.8	14206.4	14994.8	32.6209	26.2108	28.5164	19.619	28.7715	31.1231	3	3
comp2254496_c0_seq2|m.44030	35	11821.9	14486	15536.1	14043.6	16383.2	18014.8	12470.1	14603.8	16055.4	13046.8	15306.9	16499.1	13156	15592.1	16620.3	12304.9	14372.7	16007.6	13948	16147.2	14376.4	14950.9	15122.8	14228.4	27.5584	31.3092	29.0316	27.4497	30.6274	29.5323	3	3
comp2268417_c0_seq2|m.65592	60	11231.4	10427.1	13600.6	9606.1	9287.5	11756.9	10376.1	9613.7	12337.7	11663.8	10553.4	13905.3	10130.5	9342.6	12216.9	10219.8	9545.4	12397.6	11753	10216.8	10775.8	12040.8	10563.3	10720.9	23.2216	19.8103	21.7606	22.1068	21.3934	22.2522	3	3
comp2277933_c1_seq7|m.86946	79	10691.1	11077.6	13110.6	8756.7	8525.9	10385	9634.8	9900.2	11792.2	10220.1	10802.1	12866.1	10898.9	11430	13480.2	9907.8	10471.7	12176.6	11626.4	9222.53	10442.4	11296.1	11936.4	10852	22.9715	17.8824	21.0872	20.7395	24.1741	22.5243	3	3
comp2278268_c0_seq9|m.88316	82	9859.7	11418.8	9973.6	9388.3	10743.5	9427	9238.5	10748.6	9444.7	9218.7	10934.9	9663.2	8970.3	10529.6	9448.6	8939.2	10434.4	9231	10417.4	9852.93	9810.6	9938.93	9649.5	9534.87	20.5826	19.1047	19.8114	18.2477	19.5426	19.7904	3	3
comp2273926_c0_seq5|m.76421	47	11405.3	9158.6	9455.8	10290.4	8388.4	8754.6	12388.9	10299	10581.7	12537.7	10053.5	10626.3	13555	11312.7	11813.9	11572.7	9607.6	9930.2	10006.6	9144.47	11089.9	11072.5	12227.2	10370.2	19.7709	17.731	22.3947	20.3289	24.7631	21.5242	3	3
comp2273141_c0_seq2|m.74737	56	9500.4	9814.5	10272.7	8281.3	8290.3	8895.9	8671.8	8652.5	9496.4	9792	9638.1	10624.4	10570.3	10309.5	11304.9	9535.1	9402.6	10078.5	9862.53	8489.17	8940.23	10018.2	10728.2	9672.07	19.4864	16.4604	18.0538	18.3932	21.7273	20.0752	3	3
comp2278194_c0_seq1|m.87981	57	10085	8979.6	10073.7	11523.9	10259.9	11644.2	11459.5	10367.6	11706.9	9749.6	8518.2	9728	9092.7	8259.9	9243.4	9176.9	8136.8	9119	9712.77	11142.7	11178	9331.93	8865.33	8810.9	19.1905	21.6055	22.5727	17.1333	17.9545	18.2878	3	3
comp2277501_c0_seq23|m.85461	51	8423.3	9498.8	10879.1	7151.9	8126.7	9218	7350.6	8305.9	9586.2	7807.6	8957.9	10084.2	7904.9	8785.9	10223.8	7483.7	8462.9	9677.3	9600.4	8165.53	8414.23	8949.9	8971.53	8541.3	18.9684	15.8329	16.9916	16.4319	18.1696	17.7282	3	3
comp2253516_c0_seq4|m.42708	29	8905.4	9633.4	10172.2	5959.3	6248.8	7034	8074.1	8534.1	9222	11344.7	11302.6	12609.6	11770.6	11908.5	12987.9	10342.9	10519.9	12058.2	9570.33	6414.03	8610.07	11752.3	12222.3	10973.7	18.909	12.4367	17.387	21.5771	24.7533	22.7768	3	3
comp2276426_c0_seq2|m.82339	41	8635.4	9159.8	10126.4	10595.8	11524.3	12829.5	9265.6	9933.7	11017.8	9410.9	9829.4	10554.7	8930.2	9528.9	10720.5	9351.1	10174.6	11265.5	9307.2	11649.9	10072.4	9931.67	9726.53	10263.7	18.3891	22.5889	20.34	18.2344	19.6986	21.3033	3	3
comp2242759_c0_seq1|m.31140	34	8162.5	10159.8	9362.8	7580.3	9661.8	8753.5	7211.5	9163.7	8359.6	7428.9	9355.8	8577.2	7440.2	9523	8802	7011.1	9087.5	8277.5	9228.37	8665.2	8244.93	8453.97	8588.4	8125.37	18.2334	16.8017	16.6497	15.5214	17.3936	16.8649	3	3
comp2266701_c0_seq3|m.62512	37	8679.4	8934	9550.7	5637.3	5777	6383.8	8410.5	8729.7	9034.6	10865.7	10667.9	11325.4	11527.4	11724	11968.8	9444.9	9753.7	10095.8	9054.7	5932.7	8724.93	10953	11740.1	9764.8	17.8902	11.5034	17.619	20.1095	23.7765	20.2677	3	3
comp2268874_c0_seq62|m.66354	43	9225.9	10374.9	7401.7	8754.2	9967.2	7314.6	8646	9724.8	6944.4	8895.8	10534	6916.2	8359.8	9679	6650.5	8210	9509.2	6633.4	9000.83	8678.67	8438.4	8782	8229.77	8117.53	17.7838	16.8278	17.0404	16.1236	16.6673	16.8486	3	3
comp2278454_c0_seq1|m.89160	89	9468.8	7599.6	9434.8	8025.1	6462.4	8128.9	8313.2	6637.4	8320.3	10274.6	8149.2	10209	8985	7219.1	8944.9	8586.6	6844.5	8581	8834.4	7538.8	7756.97	9544.27	8383	8004.03	17.455	14.6176	15.6643	17.5231	16.9777	16.6131	3	3
comp2267968_c0_seq2|m.64758	9	7640.9	9599	8900.8	5946.3	7451.9	6692.4	6407.5	8086.3	7260.6	5572.3	7325.1	6529.2	5949.3	7597.8	6759	5900.8	7520.5	6882.8	8713.57	6696.87	7251.47	6475.53	6768.7	6768.03	17.2162	12.9851	14.6435	11.889	13.7083	14.0476	3	3
comp2278480_c1_seq1|m.89333	62	7457.8	9237.5	9365.5	5973.8	7450.3	7808	7454.6	9614.9	9650.3	8499.7	10672.7	10742.9	8439.8	10677.7	10528.9	7419.4	9418.3	9436.1	8686.93	7077.37	8906.6	9971.77	9882.13	8757.93	17.1636	13.7229	17.9859	18.308	20.0138	18.1778	3	3
Pdu_trscr_assembly_1|19681;|m.92605	6	8488.3	8925.8	8411.8	8795.7	9342.7	8763.2	8265.6	8736.4	8197.1	8472.9	8761.6	8591.5	8789.6	9267.8	8999.5	8300.2	8863.2	8256.9	8608.63	8967.2	8399.7	8608.67	9018.97	8473.43	17.0089	17.3873	16.9622	15.8054	18.2656	17.5873	3	3
gene17|m.92593	23	9028.4	8250.2	7633.5	7133.2	7140.7	5977.8	6430.9	6329.5	5255.3	7334.5	6926.2	6011.3	6332.2	6249.2	5194.1	6647.3	6549.4	5399.3	8304.03	6750.57	6005.23	6757.33	5925.17	6198.67	16.4071	13.0893	12.1269	12.4064	11.9999	12.8659	3	3
comp2276648_c1_seq1|m.82962	44	6819	8498.8	9152.4	8322.9	9966.1	9838.8	7466.7	9287.8	9051	6885.1	8884.3	8390.4	7048.1	9023	8545.3	7156.4	8884.6	8745.3	8156.73	9375.93	8601.83	8053.27	8205.47	8262.1	16.116	18.1798	17.3704	14.7857	16.6181	17.1487	3	3
comp2276737_c0_seq7|m.83159	25	6794.8	7658.6	9203.8	6985.9	7782.6	9357.5	6630	7421.5	8902.4	6564.7	7538.5	9100.6	6533	7314.6	8769	6766.4	7471.7	9063.8	7885.73	8042	7651.3	7734.6	7538.87	7767.3	15.5806	15.5933	15.4509	14.2006	15.2681	16.1217	3	3
Pdu_trscr_assembly_1|1213;|m.70099	46	7793.2	6705.5	9101.8	7647.3	6391.5	8867.4	7344.7	6272.3	8671.9	6795.7	5551	8001.7	7024.8	6046	8508.6	7557.7	6456.3	8995.2	7866.83	7635.4	7429.63	6782.8	7193.13	7669.73	15.5433	14.8049	15.0033	12.4531	14.5679	15.9192	3	3
comp2239691_c0_seq1|m.28548	14	6671.8	8644.7	8117.9	5672.4	7592.6	6908.1	5629	7425.4	6770.7	5961.3	7807.6	7071.3	5704	7356.3	6856	6080.6	7921.4	7269.7	7811.47	6724.37	6608.37	6946.73	6638.77	7090.57	15.4339	13.0385	13.3448	12.7541	13.4451	14.7171	3	3
Pdu_trscr_assembly_1|16681;|m.81096	28	7377.5	7286.1	8770.3	6247.4	6250.5	7867.3	6437.1	6560.8	8160.2	7033.2	7262.2	8638.2	6770	6954.8	8360.2	6573.7	6532.9	8202.8	7811.3	6788.4	7052.7	7644.53	7361.67	7103.13	15.4335	13.1626	14.2421	14.0353	14.9092	14.7432	3	3
comp2272631_c3_seq2|m.73605	38	8909.5	8199.8	6267.3	9615.3	9169.5	6870.8	8801	8142.5	6274.4	9097.4	8713.5	6663	9071.5	8630.5	6429.2	9127.2	8497.3	6447.2	7792.2	8551.87	7739.3	8157.97	8043.73	8023.9	15.3958	16.582	15.6286	14.9779	16.2906	16.6543	3	3
comp2269374_c0_seq3|m.67298	40	7345.9	8538.8	7155	7357.9	8310.5	7138.3	6859.1	7942.8	6782	6614.4	7869	6728.1	6521.7	7755	6483.6	6597	7596.9	6495.8	7679.9	7602.23	7194.63	7070.5	6920.1	6896.57	15.1739	14.7406	14.5287	12.9813	14.0149	14.3144	3	3
comp2273257_c0_seq9|m.74986	13	7726.5	6487.1	8295.5	8613.3	6955.6	8667.7	6984.6	5830.3	7367.8	6239.1	5041.7	6637.8	6840.1	5720.9	7391.2	6393	5227.9	6658.8	7503.03	8078.87	6727.57	5972.87	6650.73	6093.23	14.8245	15.6648	13.5856	10.9661	13.4694	12.647	3	3
comp2259638_c1_seq1|m.51328	68	7807.6	6073.3	7920.7	8060.7	6230.7	8107.5	8023.3	6291.8	8023.5	8164.4	6494.1	7820.9	7473.1	6134.1	7647.9	7527.1	5999.1	7601.2	7267.2	7466.3	7446.2	7493.13	7085.03	7042.47	14.3585	14.4771	15.0368	13.7573	14.349	14.6172	3	3
comp2278630_c0_seq8|m.90809	79	6766.9	7518.7	7362	7114.3	7846.1	7752	6632	7366	7209.9	8148.5	9214.7	8924.9	7325	8087	7784.6	7137.9	7884.4	7589.1	7215.87	7570.8	7069.3	8762.7	7732.2	7537.13	14.2571	14.6797	14.2756	16.0882	15.6596	15.644	3	3
Pdu_trscr_assembly_1|326;|m.78835	47	7171.3	8246.3	6198.1	7755.2	9078.1	6998.8	7920.7	8925	6894.1	8430.4	9313.8	7248.2	8020.2	8984.4	6740.2	7410.8	8578	6510.5	7205.23	7944.03	7913.27	8330.8	7914.93	7499.77	14.2361	15.4034	15.9799	15.2952	16.0297	15.5664	3	3
comp2272641_c0_seq2|m.73619	43	8417.6	6797	6309.8	7991.6	6699.9	6320	7598.5	6477	5842.2	7913.2	6852.2	6072.2	7437.9	6252.7	5557.1	7134.4	5974.8	5541.4	7174.8	7003.83	6639.23	6945.87	6415.9	6216.87	14.1759	13.5803	13.4072	12.7525	12.9938	12.9036	3	3
comp2278471_c0_seq8|m.89279	43	7409.1	5982	8045.3	7043.4	5715.8	7610.3	6963.4	5577.6	7492.1	8357.1	6548.7	8983.4	8141.5	6515.4	8881.9	7647.5	6168.1	8191.4	7145.47	6789.83	6677.7	7963.07	7846.27	7335.67	14.118	13.1654	13.4849	14.6201	15.8906	15.2258	3	3
comp2275107_c0_seq4|m.79080	23	5284.8	7238.8	7774.3	4850.6	6442.2	7147	4508.7	6275.6	6668.7	4082.5	6066.6	6177.5	4087.5	5779.5	6006.2	4130	5736.2	6023.2	6765.97	6146.6	5817.67	5442.2	5291.07	5296.47	13.3682	11.9182	11.7481	9.9918	10.7157	10.9933	3	3
comp2276940_c0_seq2|m.83802	40	6880.1	6014.6	7224.4	5774.7	5414.1	6392.4	6370.4	5903.7	6873.7	5244	5147.7	5698.1	5146.8	5045.8	5603	5612	5113.7	5959.9	6706.37	5860.4	6382.6	5363.27	5265.2	5561.87	13.2504	11.3632	12.8889	9.84688	10.6633	11.5441	3	3
comp2261373_c0_seq1|m.54127	27	6661.2	6825.1	6395.5	7327.6	7464.1	7083.8	6572.8	6772.3	6421.4	6866.3	7252.6	6831.6	7251.2	7316.2	6848.8	7014.4	7116.7	6578.8	6627.27	7291.83	6588.83	6983.5	7138.73	6903.3	13.0941	14.1388	13.3054	12.8216	14.4577	14.3284	3	3
tuba|m.92505	3	4872.1	7522.6	7453.3	5007.9	7506.5	7680.5	4917.7	7325	7291.8	5384.9	7813.7	7755.1	5600.5	8427	8387.5	5069	7652.4	7760.6	6616	6731.63	6511.5	6984.57	7471.67	6827.33	13.0719	13.0525	13.1492	12.8236	15.132	14.1707	3	3
Pdu_trscr_assembly_1|16061;|m.43221	25	6785.8	5929.2	7066.5	8281.2	7025.5	8927.8	7719.7	6620.7	8226.8	7265.8	6158.2	7512.9	6705.6	5950.7	7054.7	6618.8	5723.6	7003	6593.83	8078.17	7522.4	6978.97	6570.33	6448.47	13.0281	15.6635	15.1906	12.8133	13.3066	13.3843	3	3
comp2269345_c0_seq1|m.67253	41	5379.7	7311	6877.4	5939.3	8145	7713.9	6182.6	8571.3	8041.8	7112.6	10321.9	9458.4	7466.6	10367.2	9366.9	6294.9	8630.1	8187.2	6522.7	7266.07	7598.57	8964.3	9066.9	7704.07	12.8875	14.0888	15.3444	16.4583	18.3627	15.9905	3	3
comp2248808_c0_seq2|m.37043	17	7606.3	5579.9	6282.5	5438.8	3904.2	4410.8	6172	4352.7	4956.7	7000.9	4686.3	5399.7	6471.9	4383.3	4996.3	5875.7	4143.7	4648.5	6489.57	4584.6	5160.47	5695.63	5283.83	4889.3	12.8221	8.88948	10.421	10.4571	10.7011	10.1482	3	3
comp2268906_c0_seq4|m.66401	23	6772.1	6582.4	5971.5	6906	6658.7	5991.8	6893.5	6604.9	6097.5	6125.8	5517.2	5673	5993.8	5644.6	5309	6116.6	5830.5	5382.9	6442	6518.83	6531.97	5772	5649.13	5776.67	12.7281	12.6399	13.1906	10.5973	11.4409	11.99	3	3
comp2274783_c0_seq9|m.78326	22	6899	5493.6	6738.1	5245.8	4299.8	5147.5	5620	4503.4	5358.7	5452.2	4028	4812.3	5329.1	4172.4	4938.8	5250.9	4183.9	5078.5	6376.9	4897.7	5160.7	4764.17	4813.43	4837.77	12.5995	9.49657	10.4214	8.74694	9.7484	10.0412	3	3
comp2271994_c0_seq2|m.72269	29	6086.6	6222.7	6708.2	5419	5579	5776.9	5116.3	5179.9	5558	6368.9	6413.8	7086.4	6627.8	6709.6	7183	6200.4	6412.1	6868.3	6339.17	5591.63	5284.73	6623.03	6840.13	6493.6	12.5249	10.8421	10.6719	12.1598	13.853	13.478	3	3
comp2262740_c0_seq13|m.56232	31	4954.3	7416.8	6082.6	4846.2	7059.6	5890.6	4687.5	6927.8	5601.1	5065.8	7238	5814.9	4799.4	6714	5492.1	4597.1	6491.2	5361.1	6151.23	5932.13	5738.8	6039.57	5668.5	5483.13	12.1536	11.5023	11.5889	11.0886	11.4801	11.3807	3	3
comp2257601_c0_seq2|m.48241	32	5807	6295.4	5995.4	6932.1	7231.3	6711.3	6014.2	6314.3	5889.5	5379.3	5849.4	5575.6	5226.2	5607.6	5336.1	5576	5888.5	5519.9	6032.6	6958.23	6072.67	5601.43	5389.97	5661.47	11.9192	13.4919	12.2631	10.2841	10.916	11.7509	3	3
comp2269277_c0_seq3|m.67154	32	6294.3	4878.9	6554.1	6275.7	5194.5	6635.3	5881.3	4717.7	6189.4	6148.4	4524	6222.2	5552	4207.2	5747	5433.4	4384	5718.6	5909.1	6035.17	5596.13	5631.53	5168.73	5178.67	11.6752	11.7021	11.3008	10.3394	10.468	10.7488	3	3
comp2278554_c0_seq4|m.90013	42	5661.3	7222.7	4772.5	5055.9	6773.6	4367.3	5143.8	6757.8	4426.3	5345.4	7019.1	4434	4904.7	6480.7	4278.7	5087.1	6710.6	4374.8	5885.5	5398.93	5442.63	5599.5	5221.37	5390.83	11.6286	10.4685	10.9908	10.2806	10.5746	11.1891	3	3
Pdu_trscr_assembly_1|7964;|m.49648	24	4551.7	6621.1	6334	4501.9	6491.6	6277.4	4224.1	6213.6	5999.5	4019.6	6022.7	5651	4451.5	6741.5	6354.7	4259.2	6397.9	6109.3	5835.6	5756.97	5479.07	5231.1	5849.23	5588.8	11.53	11.1627	11.0644	9.60422	11.8461	11.6	3	3
comp2275068_c1_seq1|m.78996	40	4762.7	6373.1	6354.1	5319	7011.5	6874	4845	6462.4	6298.1	5047.2	6707.9	6614.9	5004	6690.8	6641.4	5026.8	6725.8	6494.2	5829.97	6401.5	5868.5	6123.33	6112.07	6082.27	11.5188	12.4124	11.8508	11.2424	12.3785	12.6243	3	3
comp2277416_c0_seq3|m.85174	36	5351.5	5521	5768.9	4732.2	4867.2	5116.1	4886	5007.5	5207.6	6020.6	6334.6	5832.5	6049	6166.2	6215.6	5445.1	5445.3	5691.3	5547.13	4905.17	5033.7	6062.57	6143.6	5527.23	10.96	9.51105	10.165	11.1308	12.4423	11.4722	3	3
comp2267169_c0_seq1|m.63315	25	5288.2	6244.7	4861.2	5371	6252.6	5006.7	4868.2	5714	4602.7	4688.3	5558	4282.1	4459.1	5154.1	4133	4546.8	5266	4243.2	5464.7	5543.43	5061.63	4842.8	4582.07	4685.33	10.7971	10.7486	10.2214	8.89131	9.27982	9.72481	3	3
Pdu_trscr_assembly_1|18745;|m.87481	51	7038.3	4652	4598.7	7451.6	5132.2	5050.3	7417.5	4993.3	5043.2	7930.8	5178.2	5284.9	7824	5282.7	5277.5	7333.5	4883.2	4929.1	5429.67	5878.03	5818	6131.3	6128.07	5715.27	10.7279	11.3974	11.7488	11.257	12.4109	11.8625	3	3
comp2273772_c0_seq2|m.76039	36	5323.4	5056.6	5830.4	5218.7	5020.4	5403.1	4982.2	4822.7	5218.7	5122	4815.7	5092	5084.9	4800.3	5305.5	5020.3	4918.2	5363.4	5403.47	5214.07	5007.87	5009.9	5063.57	5100.63	10.6762	10.11	10.1128	9.1981	10.255	10.5868	3	3
comp2139115_c0_seq1|m.6894	28	5937.1	5212.4	4992.4	5375.8	4754	4538.3	6483.5	5734.9	5367.1	7651.2	6527.2	5986.9	8056.3	7028	6579.3	7256.2	6425.7	6094.3	5380.63	4889.37	5861.83	6721.77	7221.2	6592.07	10.631	9.48042	11.8373	12.3411	14.6247	13.6824	3	3
comp2277312_c0_seq10|m.84862	32	5009.6	5804.1	5198.7	5329.4	5954.2	5536.2	4974.4	5489.9	5062.2	4596.3	5138.3	4580.8	4784.6	5350	4883	4835.8	5398.3	4980.9	5337.47	5606.6	5175.5	4771.8	5005.87	5071.67	10.5457	10.8711	10.4513	8.76095	10.1381	10.5267	3	3
comp2276936_c0_seq3|m.83786	12	4657.3	5621.1	5655.8	4716.7	5724.8	4906.9	2859.7	3679.5	3564.3	2370.5	3077.7	3240.5	2456.5	3114.3	3261.8	2570.5	3305.9	3354.1	5311.4	5116.13	3367.83	2896.23	2944.2	3076.83	10.4942	9.92011	6.80096	5.31744	5.96274	6.38623	3	3
comp2248226_c3_seq1|m.36365	18	5649.5	4454.5	5666.4	5842.3	4543.9	5469.5	5358.3	4033.5	5102	4937.8	3840.6	4935.3	4949.8	3782.6	4876.4	5216.7	4008.3	4887.9	5256.8	5285.23	4831.27	4571.23	4536.27	4704.3	10.3864	10.248	9.75619	8.39272	9.18707	9.76418	3	3
Pdu_trscr_assembly_1|998;|m.15062	8	5987.1	5139.6	4532.9	5963.9	4813.3	4333.4	5650.9	4734.2	4210.6	4853.3	4419.3	3897.8	4762.1	4258.3	3722.6	5381.5	4545.5	4024.1	5219.87	5036.87	4865.23	4390.13	4247.67	4650.37	10.3134	9.76642	9.82478	8.06022	8.60258	9.65224	3	3
comp2139380_c0_seq1|m.6935	24	4839.6	4777.9	5767	5155.4	4814.4	5844.3	4862.7	4556.2	5601.1	4875.8	4733.3	6000.3	5481.2	5183.5	6322.9	5140	4836.6	5826.8	5128.17	5271.37	5006.67	5203.13	5662.53	5267.8	10.1322	10.2211	10.1104	9.55288	11.468	10.9338	3	3
comp2279773_c0_seq1|m.91181	23	5216.4	5401.5	4709.9	5382.2	5492	4818.8	4852.1	4701.3	4424	4666.6	4443.4	4238.7	4624.1	4343.2	4229.1	4781	4572.5	4216.6	5109.27	5231	4659.13	4449.57	4398.8	4523.37	10.0949	10.1428	9.40859	8.16934	8.90866	9.38864	3	3
comp2277163_c0_seq1|m.84431	37	4823.1	5064.4	5388.9	4386.6	4877.5	4986	4343.4	4745.5	4977.7	4152.9	4567.7	4720.8	4041	4348.1	4635.8	4019.7	4404.5	4652.6	5092.13	4750.03	4688.87	4480.47	4341.63	4358.93	10.061	9.21025	9.46863	8.22607	8.79288	9.04734	3	3
Pdu_trscr_assembly_1|14638;|m.60097	26	5398.8	3991.5	5838.8	5047.5	3739.9	5618.9	4909.6	3672.7	5408.3	6001.6	4019.1	6112.6	5194	3811.7	5510.9	5018	3731.3	5597.2	5076.37	4802.1	4663.53	5377.77	4838.87	4782.17	10.0299	9.31121	9.41747	9.8735	9.79991	9.9258	3	3
comp2277945_c0_seq2|m.86985	13	4743.1	5081.6	5284.8	4298.2	4502.6	4608.7	4360.8	4649.5	4735.8	3892.7	4411.3	4404.5	3708.6	4044.5	4041.2	3797.1	4034.3	4098	5036.5	4469.83	4582.03	4236.17	3931.43	3976.47	9.9511	8.66695	9.25289	7.77754	7.96213	8.2535	3	3
comp2259363_c0_seq16|m.50888	33	4783.1	5151	5160.1	4712.6	5029.6	4844.1	4574.7	4924.4	4834.3	4902.8	5327.7	5380	4962.5	5546	5483.5	4833.7	5234.2	5084.1	5031.4	4862.1	4777.8	5203.5	5330.67	5050.67	9.94102	9.42755	9.64822	9.55355	10.7959	10.4831	3	3
comp2272319_c0_seq24|m.72950	19	4593.5	5255.4	5115.1	4172	4868.4	4621.4	3376.9	3806.4	3723	4198.1	4681.8	4593.8	3872.8	4112.7	4170.7	3705.2	4146.6	4069.3	4988	4553.93	3635.43	4491.23	4052.07	3973.7	9.85527	8.83002	7.34134	8.24584	8.20644	8.24776	3	3
comp2249005_c0_seq2|m.37257	24	4488	4529.9	5940.8	4291.7	4218.6	5676.5	4108.7	4149.7	5537.4	4216.3	4208.7	5427.4	4564	4703.8	6259.1	4225.3	4266.1	5721.5	4986.23	4728.93	4598.6	4617.47	5175.63	4737.63	9.85178	9.16934	9.28635	8.4776	10.4819	9.83337	3	3
comp2276159_c1_seq5|m.81677	19	5133.7	3690	5660.8	3690.9	2854.3	4333.5	3935.8	2946.3	4491.9	3784.7	2820.7	4467	3776.6	2901	4354.3	3618	2906	4262.9	4828.17	3626.23	3791.33	3690.8	3677.3	3595.63	9.53947	7.03122	7.65617	6.77625	7.44744	7.46305	3	3
comp2271381_c1_seq12|m.70942	16	5002.3	4493.1	4923.6	3858.5	3458	3989.4	4158.2	3770.1	4175.7	4237.5	3794.6	4302.3	4304.7	3773.7	4202.2	3949.6	3453.1	3976.4	4806.33	3768.63	4034.67	4111.47	4093.53	3793.03	9.49634	7.30733	8.14755	7.54859	8.29042	7.87277	3	3
Pdu_trscr_assembly_1|15590;|m.29311	19	5277.2	4275.3	4329.1	4009	3500.9	3086.9	5226.8	4610.7	4004.2	5870.1	5163.5	4523.5	7746.1	6819.1	5964.9	5512.9	4827	4269.1	4627.2	3532.27	4613.9	5185.7	6843.37	4869.67	9.14241	6.84902	9.31725	9.52087	13.8595	10.1074	3	3
comp2276442_c0_seq1|m.82386	53	3089.4	5478.7	5310.5	3572.3	6302.8	6069.9	3265.8	5740	5504.1	3679.2	6787.7	6224.9	3540.4	6186.5	5871.6	3441.4	6231.2	5992.4	4626.2	5315	4836.63	5563.93	5199.5	5221.67	9.14043	10.3057	9.76703	10.2153	10.5303	10.838	3	3
comp2278480_c0_seq4|m.89330	33	4742.4	4354.5	4548	3990.1	3704.8	3778.5	5145.4	4765.6	4840.2	6008.4	5720.7	6053.2	5970.7	5721.3	5798.3	5057.5	4729.3	4806.9	4548.3	3824.47	4917.07	5927.43	5830.1	4864.57	8.98652	7.41559	9.92946	10.8827	11.8074	10.0968	3	3
comp2267952_c0_seq1|m.64728	36	4860.9	4289.7	4246.1	5038	4434.4	4453.8	4827.1	4315.7	4245.1	5096.4	4679	4630.3	5029.7	4523.3	4258.5	4761.5	4178.1	4127.5	4465.57	4642.07	4462.63	4801.9	4603.83	4355.7	8.82305	9.0009	9.01178	8.81622	9.3239	9.04063	3	3
comp2270279_c0_seq7|m.68904	22	4375.5	4560.4	4402.6	3904.2	4343.2	4049.8	3982.7	4290	3991.5	4537.9	4478.3	4248.9	3701.5	3617.8	3602.4	3714.3	3895	3717.4	4446.17	4099.07	4088.07	4421.7	3640.57	3775.57	8.78472	7.94804	8.25539	8.11818	7.37305	7.83651	3	3
comp2274748_c1_seq11|m.78259	30	4201.3	4437.9	4664.6	4525.2	4849.4	4984.6	3980.7	4280.3	4560.9	4297.1	4821.1	4960.1	3921.8	4241	4485.1	3825.4	4149.5	4399.1	4434.6	4786.4	4273.97	4692.77	4215.97	4124.67	8.76187	9.28077	8.63079	8.61585	8.53838	8.5611	3	3
comp2260394_c0_seq1|m.52394	24	4477.8	5042.5	3769.4	4458.8	5101.6	3858.1	4038	4559	3481.8	4336	4646.7	3556.6	3858.3	4324.3	3278.3	3922.4	4364.2	3402.2	4429.9	4472.83	4026.27	4179.77	3820.3	3896.27	8.75258	8.67276	8.13059	7.67399	7.73706	8.08704	3	3
comp1945561_c0_seq2|m.3380	29	3998.6	4572	4460.3	3139.3	3818.2	3544.6	3346.5	3785.4	3732.8	3386.3	3973.1	3776.2	3198.9	3593	3590.7	3296.5	3829.9	3641.4	4343.63	3500.7	3621.57	3711.87	3460.87	3589.27	8.58214	6.78781	7.31334	6.81493	7.00911	7.44983	3	3
comp2271636_c1_seq22|m.71557	26	3232.3	5442.5	4352.7	3169.5	4867.1	4400.1	3020.6	4391.5	3969.8	2690.5	4231.3	3484.8	2884.2	4097.3	3622.6	2870.7	4178.5	3720.8	4342.5	4145.57	3793.97	3468.87	3534.7	3590	8.5799	8.0382	7.66148	6.36879	7.15864	7.45135	3	3
comp2269158_c0_seq1|m.66914	19	3984.2	4354.1	4616.8	3790.5	2983	3943.2	3647.1	3017.4	3787.3	3786.8	3205.5	3751.1	4272.5	3325	4294	4023.2	3101.4	4153.2	4318.37	3572.23	3483.93	3581.13	3963.83	3759.27	8.53221	6.92651	7.03541	6.57491	8.02775	7.80268	3	3
comp2276976_c1_seq4|m.83880	17	4179.2	4085.9	4668.3	4036.2	4008	4624.9	3740.9	3768.1	4250.5	3735.4	3794.9	4374.6	3680.9	3537.9	4175.4	3630.7	3603.6	4169	4311.13	4223.03	3919.83	3968.3	3798.07	3801.1	8.51792	8.1884	7.91566	7.28574	7.69203	7.88951	3	3
comp2274301_c0_seq6|m.77327	30	3856.7	3412.7	5663.3	3979	3597.7	5707.3	3896.8	3434.9	5616.6	3557.1	3240.1	5351.9	3544.9	3141.3	5219.2	3581.2	3243.5	5151.8	4310.9	4428	4316.1	4049.7	3968.47	3992.17	8.51746	8.58583	8.71587	7.43519	8.03713	8.28608	3	3
comp2265923_c0_seq1|m.61202	35	3750.2	4686.4	4390.1	3656.1	4394.1	4131.1	4030.8	4952	4727.5	5424.8	6830.7	6251.6	5736.8	7074.3	6527.8	4784.3	5818.8	5452.9	4275.57	4060.43	4570.1	6169.03	6446.3	5352	8.44765	7.87313	9.2288	11.3263	13.0554	11.1085	3	3
comp2275312_c0_seq8|m.79518	22	4109.7	4866.5	3743.1	3333.5	3729.7	2929.7	3381.8	3765	2993.1	3298.2	3780.4	3244.3	3404.7	3809.5	3083.6	3485.4	4038.3	3179.5	4239.77	3330.97	3379.97	3440.97	3432.6	3567.73	8.37692	6.4587	6.82546	6.31756	6.95187	7.40514	3	3
comp2272519_c1_seq3|m.73361	23	4358.4	4179.7	4088.2	3790.3	3853.5	3700.9	3808.9	3800.2	3620.1	4132.8	3833.5	3813.5	3760	3639.2	3508.7	3814.1	3673.4	3615.6	4208.77	3781.57	3743.07	3926.6	3635.97	3701.03	8.31567	7.33241	7.5587	7.20918	7.36373	7.68181	3	3
comp2277230_c0_seq15|m.84634	26	3915.4	3832.3	4874.4	4370.1	4250.9	5384.4	3968.1	3902.1	4973.1	4076.7	4220	5083.1	3706.2	3722	4741	3817	3826.4	4814.2	4207.37	4668.47	4281.1	4459.93	4056.4	4152.53	8.3129	9.05209	8.64519	8.18837	8.21522	8.61894	3	3
comp2277332_c0_seq1|m.84919	32	4738.4	3547.3	4208.6	4596.9	3286.1	3939.3	4356.6	3163.5	3775.8	4381.6	3566.6	4133.9	4229.8	3160.9	3787.1	4190.2	3113	3693.4	4164.77	3940.77	3765.3	4027.37	3725.93	3665.53	8.22873	7.64109	7.60359	7.39419	7.54594	7.60813	3	3
comp2261756_c0_seq3|m.54660	29	3806.9	3936.2	4658.2	3949.1	4172.1	5078.3	3892.8	4110.4	4773	4279.1	4171.1	4890.1	3830	4003.7	4418.2	3593.5	3841.2	4475.2	4133.77	4399.83	4258.73	4446.77	4083.97	3969.97	8.16748	8.53122	8.60003	8.1642	8.27105	8.24001	3	3
comp2273249_c0_seq4|m.74967	20	3403.4	4218.2	4703.6	3539.4	4498.3	4683.9	3002.5	3663.9	3981.6	3081.4	3688.5	3975.2	3151.6	3773.2	4201.7	3177.3	3926.4	4230.7	4108.4	4240.53	3549.33	3581.7	3708.83	3778.13	8.11736	8.22234	7.16747	6.57595	7.51131	7.84184	3	3
Pdu_trscr_assembly_1|5530;|m.58454	28	4753.2	4069.2	3496.4	4763.7	4169.7	3525.5	4659	3956.2	3352.4	4686.4	3597.7	3406.7	4246.9	3456.2	3071.8	4274.7	3662.5	3069.5	4106.27	4152.97	3989.2	3896.93	3591.63	3668.9	8.11315	8.05255	8.05574	7.15471	7.27395	7.61512	3	3
comp2274909_c0_seq7|m.78615	19	3855.2	3663.2	4795.4	3102.6	2858.5	3906.9	4159	3968.2	5111.9	4887.7	4742.2	6446.5	6345.5	6016.8	8175.6	4316.2	4069.8	5292.7	4104.6	3289.33	4413.03	5358.8	6845.97	4559.57	8.10985	6.37797	8.91162	9.83868	13.8648	9.46377	3	3
Pdu_trscr_assembly_1|1986;|m.5697	24	4004.4	4752	3457.8	4443.3	4960	3556.1	4030.7	4307.9	3089.3	4433.2	4609.9	3301	4321.1	4459.5	3041	4373.3	4609.1	3185.7	4071.4	4319.8	3809.3	4114.7	3940.53	4056.03	8.04426	8.37603	7.69245	7.55453	7.98056	8.41865	3	3
comp2274541_c0_seq1|m.77862	32	4291.4	3981	3940.7	5098.2	4558.3	4590.8	4170.1	3938.5	3955.1	5415.3	4842.1	4981.3	6923.7	6166.8	6234.7	6507.3	5877.8	5884.2	4071.03	4749.1	4021.23	5079.57	6441.73	6089.77	8.04353	9.20844	8.12042	9.32601	13.0461	12.6398	3	3
comp2278509_c0_seq8|m.89637	28	4402.8	3996.3	3746.1	4459	4000.7	3634.3	4567.1	4080.7	3849.2	6201.9	5545.7	5474.4	5736.4	5093.1	4900.1	5114.1	4381.8	4290.4	4048.4	4031.33	4165.67	5740.67	5243.2	4595.43	7.99881	7.8167	8.41209	10.5398	10.6188	9.53822	3	3
comp2262887_c0_seq1|m.56477	19	4359.2	3195.2	4548.7	4233.6	3042	3797.2	4233	3036.9	3825.4	4669.3	3331	4252.1	4440.5	3169.7	4124	4472	3259.8	3957.4	4034.37	3690.93	3698.43	4084.13	3911.4	3896.4	7.97109	7.15667	7.46856	7.49841	7.92156	8.08731	3	3
comp2269230_c0_seq2|m.67055	26	3848.5	4995.8	3256.3	3718.5	4848.8	3316	3703.7	4798.7	3294.6	4014.7	4994.7	3413.8	3562.5	4517.3	3125.5	3619.2	4677.6	3156.8	4033.53	3961.1	3932.33	4141.07	3735.1	3817.87	7.96944	7.68052	7.9409	7.60294	7.5645	7.92431	3	3
comp2250470_c0_seq1|m.38949	10	3721.3	3406.2	4814.9	3504.5	3109.6	4634.8	3421.2	3007.2	4501.4	3251	2863	4647.2	2937.2	2518.4	4001.6	3281.5	2825.4	4353.7	3980.8	3749.63	3643.27	3587.07	3152.4	3486.87	7.86525	7.27049	7.35716	6.5858	6.38439	7.23729	3	3
comp2274926_c0_seq2|m.78666	23	3907.1	4748.3	3166.5	4091	4898.7	3331.8	3731.6	4699.2	3076.1	3958.8	5406.1	3480.4	3650.4	4708.9	3085.9	3693.3	4502.1	2966.4	3940.63	4107.17	3835.63	4281.77	3815.07	3720.6	7.78589	7.96374	7.74562	7.86126	7.72646	7.72242	3	3
comp2276710_c0_seq15|m.83110	25	3540.7	4037.5	4127	3821.9	4493.5	4550.2	3420.8	4083	4102.7	3550.4	4215.2	4370.1	3185.6	3805.5	3929.1	3269.2	3830.1	3930.2	3901.73	4288.53	3868.83	4045.23	3640.07	3676.5	7.70903	8.31541	7.81267	7.42699	7.37204	7.63089	3	3
comp2278363_c0_seq7|m.88713	31	5693.6	3189.3	2813	5708	3156.6	2846	5117.9	2933.7	2563.7	4944.8	2899	2413.5	4771.2	2765.4	2326.9	4894.2	2819.7	2391.8	3898.63	3903.53	3538.43	3419.1	3287.83	3368.57	7.70291	7.5689	7.14546	6.27742	6.65868	6.99175	3	3
comp2268892_c0_seq1|m.66381	12	3674.2	3681.9	4310.4	2721.3	2580.1	2901.2	2788.7	2776.6	3267.5	2652.8	2888.8	3148.9	2559.9	2652	2950.9	2629.9	2699.2	3075.3	3888.83	2734.2	2944.27	2896.83	2720.93	2801.47	7.68354	5.30158	5.94561	5.31854	5.51057	5.81468	3	3
comp2272233_c0_seq1|m.72760	25	3566.2	3265.5	4704.5	4202.2	3910.9	5460.2	3797.9	3449	4905.6	3449.7	3138.2	4297.7	3338.2	3034.1	4461.2	3569.6	3327.2	4691.8	3845.4	4524.43	4050.83	3628.53	3611.17	3862.87	7.59773	8.77282	8.1802	6.66193	7.31351	8.01771	3	3
comp2273595_c0_seq1|m.75667	22	4273.1	4049.3	3195	3910.2	3570.4	2888.3	3780.1	3328.1	2769.8	4067.3	3716.8	2970.2	4125.9	3974.9	3035.8	3934.2	3760.4	2912.2	3839.13	3456.3	3292.67	3584.77	3712.2	3535.6	7.58535	6.70172	6.64917	6.58158	7.51813	7.33844	3	3
comp2277077_c0_seq1|m.84159	27	2749.3	3899	4702.1	3214.3	4477.8	5234.4	3137.6	4229.4	4790.1	2672.5	4253.7	4900.1	3018.6	4196.5	5052.4	2900.7	4094.4	4915.5	3783.47	4308.83	4052.37	3942.1	4089.17	3970.2	7.47536	8.35477	8.18329	7.23764	8.28158	8.24049	3	3
comp2138394_c0_seq1|m.6761	23	4246.9	3717.6	3348.2	4883.4	4320.9	3859	4508.3	3990.4	3561.6	4826.9	4321	3838.4	4430.8	3973.9	3452.6	4522.7	3919	3465.6	3770.9	4354.43	4020.1	4328.77	3952.43	3969.1	7.45053	8.44319	8.11813	7.94755	8.00466	8.23821	3	3
comp2274517_c0_seq1|m.77807	35	4287.6	3419.8	3544.6	4243.5	3388.8	3505.6	4588.6	3600.6	3806	4642.3	3806.5	3859	4506.1	3463.8	3538.9	3952.4	3064.1	3178.8	3750.67	3712.63	3998.4	4102.6	3836.27	3398.43	7.41055	7.19875	8.07431	7.53231	7.76939	7.05374	3	3
Pdu_trscr_assembly_1|12794;|m.61443	32	2792.2	4147.2	4262.9	2247.9	3365.2	3409.2	2817.3	4123.7	4104.2	2767.2	3811.5	3950.7	2714.1	3980.7	4037.1	2459.2	3634.8	3708.2	3734.1	3007.43	3681.73	3509.8	3577.3	3267.4	7.37782	5.83137	7.43484	6.44394	7.24492	6.78177	3	3
comp2262955_c0_seq1|m.56580	15	3786.2	3923.7	3450.7	3624.1	3715.7	3336.4	3558.8	3622.3	3099.7	3484.1	3583.7	2965.3	3609.5	3782.1	3240.4	3553.2	3628.1	3197	3720.2	3558.73	3426.93	3344.37	3544	3459.43	7.35036	6.90034	6.9203	6.14021	7.17748	7.18035	3	3
comp2261428_c0_seq1|m.54200	21	3707.2	4014.1	3407.6	4187.5	4565.4	3816.3	3700.6	4004.7	3312.8	3853.2	4206.2	3428.2	3907.9	4262.9	3397.9	3882.4	4313.4	3428.9	3709.63	4189.73	3672.7	3829.2	3856.23	3874.9	7.32948	8.12384	7.4166	7.03035	7.80983	8.04269	3	3
comp1953876_c0_seq1|m.3493	14	3426.5	3416.6	4213.9	3128.3	3161.2	4054.6	3618.4	3558.1	4393.9	4315.5	4173.8	5730.9	4255.8	4124	5132.3	3763.8	3703.5	4699.2	3685.67	3448.03	3856.8	4740.07	4504.03	4055.5	7.28213	6.68569	7.78837	8.70269	9.12178	8.41754	3	3
comp2252059_c0_seq1|m.40786	22	3825.9	3055.9	4054.7	3862.5	3164.3	4254.3	3615.8	2856.1	3831.5	3654.7	2774.3	3703	3794.8	2912.4	3855.4	3724.9	2936.9	4024.3	3645.5	3760.37	3434.47	3377.33	3520.87	3562.03	7.20277	7.2913	6.93551	6.20073	7.13063	7.39331	3	3
comp2278010_c1_seq9|m.87231	21	4527.1	3847.9	2506.3	4475.5	3842.7	2513.5	4004	3474.1	2268.9	4104	3634.3	2286	3447.2	2936.8	1908.5	3799.2	3200.3	2123.9	3627.1	3610.57	3249	3341.43	2764.17	3041.13	7.16641	7.00084	6.56099	6.13482	5.59812	6.31213	3	3
comp2256770_c0_seq1|m.46959	15	3947.3	3459.5	3441.9	3814.6	3439.9	3366.5	3496.9	3234.9	3028.9	3013.8	2869.1	2621.3	3316.5	3178.9	2916	3391.2	3092.1	2976.5	3616.23	3540.33	3253.57	2834.73	3137.13	3153.27	7.14494	6.86466	6.57021	5.20453	6.35347	6.54488	3	3
comp2276593_c0_seq3|m.82791	24	3388.2	3309.2	4124	3199.6	3217.8	3867.6	3043.2	3080.1	3714.4	2386.6	2462.2	3236.9	2362.6	2487.5	3072	2262.3	2351.9	2932.4	3607.13	3428.33	3279.23	2695.23	2640.7	2515.53	7.12696	6.64749	6.62204	4.94841	5.34807	5.22121	3	3
comp2276320_c0_seq3|m.82092	37	3802.7	3966.3	2870.4	4160.9	4431.8	3255.2	3685.8	3864.2	2853.4	4022	4545.3	3273.7	4074.4	4340	3234.5	3922.5	4122.4	3055.4	3546.47	3949.3	3467.8	3947	3882.97	3700.1	7.0071	7.65764	7.00283	7.24663	7.86397	7.67988	3	3
comp2269171_c0_seq3|m.66933	18	2711.5	4149.6	3761	3171.4	4531.7	3975.5	2959.8	4426.7	3992.6	2715.4	4169	3906.6	2751.3	4081.5	3812.4	2577.1	3694.3	3439.3	3540.7	3892.87	3793.03	3597	3548.4	3236.9	6.9957	7.54822	7.6596	6.60404	7.18639	6.71846	3	3
comp2267209_c0_seq1|m.63399	24	3231.7	3311.3	3954.8	2684.2	2815.4	3237.7	2827.6	2864.9	3429.8	3783.8	3581.3	4471.3	3161.1	3108.9	3799.4	2954.7	2951.7	3514.8	3499.27	2912.43	3040.77	3945.47	3356.47	3140.4	6.91384	5.64717	6.14048	7.24382	6.79768	6.51817	3	3
comp2251705_c0_seq1|m.40358	9	3926.6	2581.9	3978.7	3995.3	2522.8	3957.7	3761	2256.3	3796.9	4427.2	2568.9	4115.8	3527.4	2056.1	3547.8	3537.3	2216.2	3524.7	3495.73	3491.93	3271.4	3703.97	3043.77	3092.73	6.90686	6.77081	6.60622	6.80043	6.16438	6.41923	3	3
comp2263909_c0_seq2|m.58087	18	2697.3	3585.6	4035.1	3165.6	4304.4	4624.3	2902.2	3855.1	4303.4	3132.4	4010.2	4785.6	2992.7	4123.8	4758.5	2940.6	4057.8	4370.6	3439.33	4031.43	3686.9	3976.07	3958.33	3789.67	6.79542	7.8169	7.44527	7.3	8.01661	7.86578	3	3
comp2278308_c1_seq12|m.88483	24	3451.5	3235.1	3540.8	3313.5	3134.3	3482.3	3154.2	3031.9	3301.6	2943.2	2673.9	2882.1	3133.8	2967.4	3210.3	3260.7	3111.4	3302.6	3409.13	3310.03	3162.57	2833.07	3103.83	3224.9	6.73575	6.41811	6.38644	5.20147	6.28603	6.69356	3	3
comp2274295_c0_seq2|m.77311	20	3550.6	2851.4	3765.6	2707.4	2275.8	2850.2	3347.9	2721.5	3532.8	4247	3086.3	4570	4194.7	3387.9	4742.9	3479.8	2955.9	3806.3	3389.2	2611.13	3200.73	3967.77	4108.5	3414	6.69637	5.06295	6.46352	7.28476	8.32073	7.08605	3	3
comp2268391_c0_seq1|m.65566	17	3548.1	2978.4	3472.7	3635.6	3061.9	3544.1	3430.4	2893	3357.9	3449.5	2662.5	3420.2	3356.9	2806	3237.7	3404	2794.7	3260.4	3333.07	3413.87	3227.1	3177.4	3133.53	3153.03	6.58546	6.61944	6.51676	5.83366	6.34618	6.54439	3	3
comp2223962_c0_seq7|m.19686	10	3422.9	2921.6	3564.9	2664.1	2258.6	2512	2471.7	2111	2417.2	2226.9	1988.6	2342.7	1990.2	1742.7	1968.8	2349.9	1998.9	2178.5	3303.13	2478.23	2333.3	2186.07	1900.57	2175.77	6.52632	4.80526	4.71183	4.01359	3.84912	4.51599	3	3
comp2278366_c1_seq1|m.88733	19	2779.6	4324.5	2804.5	2748.7	4196.4	2700.4	2569.4	3976.8	2623.2	2525.6	4108.3	2669.4	2508.1	3870.5	2479	2517.2	3882.3	2583.3	3302.87	3215.17	3056.47	3101.1	2952.53	2994.27	6.52579	6.23416	6.17219	5.69357	5.97961	6.21486	3	3
comp2263250_c0_seq1|m.57052	10	3006.2	3701.5	3140.4	3183.5	3882.5	3062.5	3206.8	3972.4	3127.7	3268	4202.9	3059.9	2505.9	3228.9	2514.9	2841.1	3624.3	2766.3	3282.7	3376.17	3435.63	3510.27	2749.9	3077.23	6.48595	6.54634	6.93787	6.4448	5.56923	6.38706	3	3
comp2271307_c0_seq1|m.70799	7	2563.4	2738.3	4536.1	2306.3	2649	3654.8	2256.2	2594.1	3497.5	1446.1	1838.7	2257.2	1367.4	1696.6	2177	1541.6	1805.5	2523.7	3279.27	2870.03	2782.6	1847.33	1747	1956.93	6.47916	5.56496	5.61914	3.39168	3.53811	4.06178	3	3
comp2273865_c0_seq2|m.76255	30	3374.6	2549.3	3841.4	3643.7	2773.7	4005.8	3669.9	2745.6	3967.6	2968	2047.8	3025.9	2533.5	1965.6	2787.3	2532.1	1964	2809.5	3255.1	3474.4	3461.03	2680.57	2428.8	2435.2	6.43142	6.73681	6.98916	4.92148	4.91892	5.05447	3	3
comp2270432_c0_seq1|m.69185	21	3923.4	3788.9	2029	3938.8	3951.7	2237	3590	3530	1971.1	4249.1	4338.5	2284.7	3848	3850.7	2168.4	3735.5	3766.9	2110.1	3247.1	3375.83	3030.37	3624.1	3289.03	3204.17	6.41561	6.5457	6.11948	6.65379	6.66111	6.65052	3	3
comp2254520_c0_seq1|m.44059	18	3005.2	2663.1	4016.3	3441.4	3090	4745.3	3119.1	2826.5	4243.2	2999.5	2512.8	3855.5	3052	2650.3	4125.4	3174.2	2770.5	4311.9	3228.2	3758.9	3396.27	3122.6	3275.9	3418.87	6.37827	7.28846	6.85837	5.73305	6.63451	7.09615	3	3
comp2201655_c0_seq1|m.13229	22	3328.6	3041.2	3286.1	3248.7	3199.3	3424.7	3047.9	2946.7	3279.3	3010.6	2926.8	3296.7	3166.5	2954.4	3415.9	3107.2	2967.9	3349.3	3218.63	3290.9	3091.3	3078.03	3178.93	3141.47	6.35936	6.38101	6.24253	5.65122	6.43813	6.52038	3	3
comp2245014_c0_seq2|m.33157	13	3328	2764.3	3538.9	2768.7	2290.9	3082.1	2446.1	2122.6	2785.7	2294.7	2097.8	2672.5	1958.3	1752.2	2382.6	2336.3	2053.4	2687.4	3210.4	2713.9	2451.47	2355	2031.03	2359.03	6.3431	5.26222	4.95046	4.32375	4.11335	4.89638	3	3
comp2275467_c0_seq60|m.79906	19	2670.1	3036	3849.6	2616.6	2990.6	3822.7	2441.1	2669.4	3564.3	2441	2616.2	3663.6	2325.6	2533.7	3480.4	2315.6	2562.9	3358.4	3185.23	3143.3	2891.6	2906.93	2779.9	2745.63	6.29337	6.09482	5.83926	5.33709	5.62999	5.6988	3	3
comp2267341_c0_seq1|m.63653	7	3091.8	2566.8	3859.6	2848	2364.6	3620.5	2719.8	2314.4	3509.2	2739	2256.5	3545.2	2307.2	2079.9	3160.6	2481.5	2114.9	3314.1	3172.73	2944.37	2847.8	2846.9	2515.9	2636.83	6.26868	5.70909	5.75081	5.22687	5.09532	5.47297	3	3
comp2267732_c0_seq2|m.64331	11	2317.5	4249.4	2925.7	2422.1	4439.6	2846.1	2269.2	4029.7	2682.6	2078.6	3525.8	2413.8	1971	3263.7	2329.1	1994.2	3441.6	2219.2	3164.2	3235.93	2993.83	2672.73	2521.27	2551.67	6.25182	6.27443	6.04571	4.9071	5.10619	5.2962	3	3
comp2271369_c0_seq1|m.70920	20	3104.4	2417	3871.5	3451.1	2589.5	4204.7	2989.9	2393.1	3929.2	3391.1	2748.3	4364.3	3312.5	2656.5	4255.9	3292.4	2606.1	4182	3130.97	3415.1	3104.07	3501.23	3408.3	3360.17	6.18615	6.62183	6.26831	6.42821	6.90265	6.97431	3	3
comp2274299_c0_seq4|m.77323	18	2938.1	2792.9	3635.6	2967.2	2840.5	3585.9	2819.2	2853.3	3503.5	2705.5	2536.1	3511.9	2485	2523	3305.6	2519.3	2485.9	3181.6	3122.2	3131.2	3058.67	2917.83	2771.2	2728.93	6.16883	6.07135	6.17663	5.3571	5.61237	5.66414	3	3
comp1838578_c0_seq1|m.2293	10	3260.2	2895	3165.1	3428.8	3031.4	3230	3475.7	3052.3	3319.6	3334.3	2922.2	3217.2	3254.9	2805.3	3069.3	3384.2	2950.6	3211.1	3106.77	3230.07	3282.53	3157.9	3043.17	3181.97	6.13834	6.26306	6.6287	5.79786	6.16317	6.60445	3	3
comp2270317_c0_seq2|m.68984	26	3501.7	3102.2	2709.9	3517.4	3146.5	2804	3272.6	3002.9	2611.2	3567.8	3267.6	2801.5	3268	2894.4	2562.9	3351.2	2989	2550.6	3104.6	3155.97	2962.23	3212.3	2908.43	2963.6	6.13406	6.11938	5.98189	5.89774	5.8903	6.15121	3	3
comp2234809_c0_seq1|m.25266	8	3312.2	3593.1	2353.6	3201.5	3392.5	2332.2	3002.9	3155.7	2139.4	2534.7	2905.9	1867.8	2638.5	2877.6	1888.3	2875.9	3037.9	2053.4	3086.3	2975.4	2766	2436.13	2468.13	2655.73	6.0979	5.76926	5.58562	4.47271	4.99858	5.5122	3	3
comp2275153_c0_seq1|m.79199	30	2523.1	3204.5	3480.6	2537.4	3049.1	3147	2468.4	2933.4	3235.6	2637.1	3337.4	3664.3	2631.8	3211.1	3727.9	2521.5	3114.6	3465.8	3069.4	2911.17	2879.13	3212.93	3190.27	3033.97	6.06451	5.64471	5.81408	5.8989	6.46108	6.29726	3	3
comp2276825_c0_seq1|m.83424	24	3654.7	2455.2	3084.7	3787	2537.9	3203.7	3733	2530.1	3167.8	4033.9	2860.1	3312.1	3950.6	2720.2	3338.7	3763.1	2584.3	3168.2	3064.87	3176.2	3143.63	3402.03	3336.5	3171.87	6.05555	6.15861	6.34821	6.24608	6.75724	6.58348	3	3
comp2274912_c0_seq4|m.78634	19	3650.2	3104.6	2389.8	3957	3250.4	2592.3	3584.9	2964	2359.4	3627.3	2974.8	2309	3523.7	2986.3	2337.7	3483.7	3007.6	2217.7	3048.2	3266.57	2969.43	2970.37	2949.23	2903	6.02262	6.33383	5.99643	5.45355	5.97293	6.02543	3	3
comp2273647_c0_seq2|m.75785	19	3509.7	2363.2	3233.5	2789.3	2105	2768.7	3287.1	2433.9	3223.3	2817.5	2397.1	2735.8	2566.9	1889.8	2423.3	2727.9	2032	2666.4	3035.47	2554.33	2981.43	2650.13	2293.33	2475.43	5.99746	4.95282	6.02067	4.86561	4.64457	5.13797	3	3
Pdu_trscr_assembly_1|91632;|m.21453	34	3153.4	2713	3236.3	3432.9	3078.4	3479.2	3411.5	3089.4	3629.9	3726.9	3253.9	4116.1	3426.1	3020.7	3809.7	3154	2788.4	3246	3034.23	3330.17	3376.93	3698.97	3418.83	3062.8	5.99503	6.45715	6.81933	6.79125	6.92399	6.3571	3	3
comp2252285_c0_seq2|m.41107	18	2695.2	3434.3	2961.4	2420.3	3041.4	2989.2	1962.6	2703.8	2431.2	2272.5	3451.9	2922.6	2128.4	3073.4	2648.5	1994.8	2807.1	2484.3	3030.3	2816.97	2365.87	2882.33	2616.77	2428.73	5.98726	5.46206	4.7776	5.29192	5.2996	5.04104	3	3
comp2276577_c0_seq8|m.92288	26	3070.5	2932.8	3065.2	3069.4	2888.5	3071.3	3393	3239.1	3435.5	3814.5	3637.5	3643.2	3506.7	3310.9	3502.2	3011.8	2844.5	2956	3022.83	3009.73	3355.87	3698.4	3439.93	2937.43	5.9725	5.83583	6.77679	6.79021	6.96672	6.0969	3	3
comp2254053_c0_seq1|m.43484	16	3130.4	2932	2999.1	3367.9	3111.5	3339.1	3142.2	2917.7	3062.1	2852	2656.2	2658.3	2810.8	2651	2774.4	2967.8	2773.5	2912.4	3020.5	3272.83	3040.67	2722.17	2745.4	2884.57	5.96789	6.34598	6.14028	4.99786	5.56012	5.98717	3	3
comp2264796_c2_seq1|m.59361	9	3454.9	2008.4	3509.1	3644.6	2100.4	3646.8	3319.6	1923.6	3268.2	2980.3	1717.4	2870	2900.2	1638	2776.2	3263.4	1829.3	3173.4	2990.8	3130.6	2837.13	2522.57	2438.13	2755.37	5.90921	6.07019	5.72927	4.6314	4.93782	5.719	3	3
comp2265370_c0_seq1|m.60276	20	2668.3	3255.6	2973.3	2838.6	3533.9	3063.8	2625	3205	2944.4	2599.3	3121.3	2910.5	2495.3	3078.6	2912.8	2626.3	3145	2887.5	2965.73	3145.43	2924.8	2877.03	2828.9	2886.27	5.85969	6.09895	5.9063	5.28219	5.72922	5.99069	3	3
comp2254206_c0_seq1|m.43646	28	2662.7	3207.7	2988.2	2747.8	3207.5	2949.6	2439.9	2970.3	2739.5	2093.2	2682.4	2554.5	2232.4	2715	2727.3	2347.3	2716.7	2595.9	2952.87	2968.3	2716.57	2443.37	2558.23	2553.3	5.83426	5.75549	5.4858	4.48599	5.18106	5.29959	3	3
comp2211414_c0_seq1|m.14992	18	2370	3788.3	2661.1	2546.4	4033.2	2918.8	2418.3	3855.2	2786.8	2903.1	4594.6	3151.2	2777.1	4299.4	3086.4	2610.4	4069.1	2932	2939.8	3166.13	3020.1	3549.63	3387.63	3203.83	5.80845	6.13909	6.09875	6.51707	6.8608	6.64983	3	3
comp2265255_c2_seq1|m.60100	27	2997.4	3033.2	2773.7	1892.9	2015.1	1692.4	2393.7	2476.4	2131.8	2967	2963.2	2468.7	3046.3	3031.3	2668.5	2510.4	2453.2	2114.1	2934.77	1866.8	2333.97	2799.63	2915.37	2359.23	5.7985	3.6197	4.71318	5.14009	5.90434	4.89679	3	3
comp2272378_c0_seq1|m.73076	16	2502.5	2710.2	3588.9	2572.8	2690.7	3764.8	2356.7	2403.8	3372.9	2183.5	2181	3063.7	2179.5	2216.1	2996.8	2298.8	2302.8	3244.2	2933.87	3009.43	2711.13	2476.07	2464.13	2615.27	5.79672	5.83525	5.47482	4.54602	4.99048	5.42821	3	3
comp2197446_c0_seq1|m.12404	19	3159.5	3006.6	2630.1	3630.7	3452.1	2971.5	3352.6	3090.5	2708.5	3323.6	3061.9	2605.9	3604.7	3337.9	2850.9	3412.9	3182.2	2686.5	2932.07	3351.43	3050.53	2997.13	3264.5	3093.87	5.79317	6.49838	6.1602	5.50269	6.61142	6.42159	3	3
comp2254426_c0_seq1|m.43954	13	3935.7	2573.8	2283.8	4146	2808.6	2326.9	3583.3	2374.8	1949.6	3833	2371	2094	3671.1	2365.6	2010.1	3825.6	2572.7	2168.9	2931.1	3093.83	2635.9	2766	2682.27	2855.73	5.79126	5.9989	5.3229	5.07834	5.43226	5.92732	3	3
comp2261716_c0_seq2|m.54597	18	3122.7	2647	3021.1	2950.8	2589	2966.6	3277.8	2771.5	3214.7	3657.2	3116.4	3563.5	3459.2	2962.2	3380.7	2938	2510.7	2852.6	2930.27	2835.47	3088	3445.7	3267.37	2767.1	5.78961	5.49793	6.23586	6.32625	6.61723	5.74335	3	3
comp2254394_c0_seq2|m.43926	12	2280.5	3820.9	2669.4	2596.4	4239	2977.8	2333.9	3808	2640.9	2278.3	3585.2	2641.3	2249.7	3779.9	2607.1	2325.4	3806.8	2671.8	2923.6	3271.07	2927.6	2834.93	2878.9	2934.67	5.77644	6.34255	5.91195	5.2049	5.83049	6.09115	3	3
comp2274806_c0_seq1|m.78376	33	1860.5	3602.7	3297.9	1531.7	2968.2	2768.6	1780.9	3365.5	3018.6	2248.6	4100.9	3633.1	1937	3899.3	3314.1	1758.9	3334.9	2953.4	2920.37	2422.83	2721.67	3327.53	3050.13	2682.4	5.77005	4.69784	5.4961	6.1093	6.17728	5.56755	3	3
comp2266507_c0_seq10|m.62138	20	2916.5	3404.8	2435.3	3676.5	4335.2	3040.4	2891.8	3338.4	2411.8	2419.4	2806.4	1933.5	2432.8	2773.6	2035	2904.6	3381.7	2568.8	2918.87	3684.03	2880.67	2386.43	2413.8	2951.7	5.76709	7.14329	5.81718	4.38146	4.88854	6.12651	3	3
comp2274036_c0_seq6|m.76723	19	2304	3399	3038.9	2425.6	3594.2	3212.9	2198.9	3366.3	2957.5	2349.8	3542.6	2939.1	2124.2	3239	2834.6	2104.7	3103.2	2774.2	2913.97	3077.57	2840.9	2943.83	2732.6	2660.7	5.75741	5.96736	5.73687	5.40483	5.53419	5.52251	3	3
comp2240448_c0_seq4|m.29168	18	2694.4	2893.5	3087.7	2490.8	2685.7	2875.7	2332.3	2461.6	2730.7	2375.6	2653.2	2631.4	2068.2	2356.7	2459.5	2185.7	2441.1	2555.6	2891.87	2684.07	2508.2	2553.4	2294.8	2394.13	5.71374	5.20437	5.06502	4.688	4.64754	4.96923	3	3
comp2270828_c0_seq11|m.69939	25	2957.5	2767.2	2760.8	3381	3163.9	3110.1	2818.3	2652.7	2722.6	2786	2779.5	2817.2	2664.8	2431.1	2659.9	2901.1	2695.4	2728.7	2828.5	3218.33	2731.2	2794.23	2585.27	2775.07	5.58854	6.24031	5.51535	5.13017	5.23581	5.75989	3	3
comp2271044_c0_seq1|m.70310	28	3217.1	2721.5	2544.2	3382.4	2954.3	2775.4	3254.4	2725.9	2560.4	3383.9	2695.6	2517.8	3317.4	2681.1	2570.1	3326.3	2761.9	2676.7	2827.6	3037.37	2846.9	2865.77	2856.2	2921.63	5.58676	5.88941	5.74899	5.26151	5.78451	6.0641	3	3
comp2261971_c0_seq1|m.55022	12	2602.2	2796	3017.3	2552.6	2809.4	3001.3	2305.7	2423.4	2705.7	2141.2	2119.8	2347.8	1934.1	1916.4	2167	2015.8	2012.8	2367.3	2805.17	2787.77	2478.27	2202.93	2005.83	2131.97	5.54244	5.40544	5.00458	4.04455	4.06231	4.42508	3	3
Pdu_trscr_assembly_1|15725;|m.38093	19	2384.1	2583.8	3388.9	2458.2	2455.5	3307.6	2356.2	2446.4	3156.4	2445.5	2605.2	3253.6	2403.3	2530.7	3148.9	2265.5	2486.6	3053.8	2785.6	2740.43	2653	2768.1	2694.3	2601.97	5.50378	5.31366	5.35743	5.08219	5.45663	5.40061	3	3
comp2276577_c0_seq1|m.82741	27	2575.6	2895	2862.3	2796.3	3060.9	2972.3	2555.8	2928.5	2787.9	3304.4	3484	3334.9	3047.2	3344	3201.5	2837.2	3112.7	3005.6	2777.63	2943.17	2757.4	3374.43	3197.57	2985.17	5.48804	5.70676	5.56826	6.19541	6.47587	6.19597	3	3
comp2258193_c0_seq1|m.49089	9	2739.3	2945.5	2601.7	2792	2636.4	2453.6	2535.4	2450.4	2188.4	2969.9	2730.3	2475.6	2603.9	2634.3	2380.2	2588.7	2593.3	2322.7	2762.17	2627.33	2391.4	2725.27	2539.47	2501.57	5.45748	5.09436	4.82916	5.00355	5.14305	5.19222	3	3
comp2277675_c0_seq81|m.86041	24	3332.4	2558.4	2351.8	3444.3	2616.7	2400.4	3321.4	2594.5	2398.7	3682.8	2811	2580.1	3509.4	2790.7	2519	3263.7	2581.4	2431	2747.53	2820.47	2771.53	3024.63	2939.7	2758.7	5.42857	5.46885	5.5968	5.55318	5.95362	5.72592	3	3
comp2279213_c0_seq1|m.91075	18	3378.9	2582.1	2281.5	3141.5	2729.7	2208.3	3143.9	2550.7	2112.8	3181.1	2407.1	2035.6	3097.4	2317.5	1945.2	3087.7	2382.7	1970.2	2747.5	2693.17	2602.47	2541.27	2453.37	2480.2	5.4285	5.22201	5.25539	4.66573	4.96868	5.14787	3	3
comp2272724_c0_seq1|m.73818	23	2709.8	2609.4	2918	3132.7	2966.7	3406.1	2968.8	2824.5	3171.4	3382.6	3406.5	3969.7	3217	3129.2	3503.7	2880.9	2782.5	3182.6	2745.73	3168.5	2988.23	3586.27	3283.3	2948.67	5.42501	6.14368	6.0344	6.58433	6.6495	6.12021	3	3
comp2276973_c0_seq1|m.83872	24	3086.4	2108.2	3011.9	3498.4	2405.1	3415.8	3381.8	2248.4	3196.6	3618.1	2379.6	3375.5	3214.3	2144.1	2991.1	3043.6	2114.7	2971.5	2735.5	3106.43	2942.27	3124.4	2783.17	2709.93	5.40479	6.02333	5.94157	5.73635	5.6366	5.6247	3	3
comp2278376_c0_seq1|m.88768	27	3257.2	2781.7	2160.4	2976.7	2536.6	1946.9	3141.4	2645.2	1947.7	3035.1	2592.3	1900.5	2883.9	2465.9	1844.6	2936.1	2441.8	1893.6	2733.1	2486.73	2578.1	2509.3	2398.13	2423.83	5.40005	4.82174	5.20618	4.60704	4.85681	5.03087	3	3
comp2276413_c0_seq21|m.82313	19	2270	2684.3	3140.8	2489.8	2980.4	3413.4	2174.2	2576.5	3024.7	2373	2798.5	3603.3	2088.4	2423.3	2912.8	2217.7	2599	3071.7	2698.37	2961.2	2591.8	2924.93	2474.83	2629.47	5.33142	5.74173	5.23384	5.37013	5.01215	5.45768	3	3
comp2205419_c0_seq2|m.13843	13	2245.5	3028.6	2710.9	2007.3	2838.9	2595.3	2007.1	2813.1	2611.5	2191.2	3108.4	2895.1	2031	2806.8	2618.3	1922.8	2807.5	2478.5	2661.67	2480.5	2477.23	2731.57	2485.37	2402.93	5.25891	4.80966	5.00249	5.01512	5.03348	4.98749	3	3
comp2220386_c0_seq1|m.18230	11	2375.4	3423.5	2118.7	2640.4	3820.7	2400.5	2471.5	3476.7	2172.2	2479.9	3513.1	2235.1	2553.8	3677.7	2212.3	2383	3504	2151.9	2639.2	2953.87	2706.8	2742.7	2814.6	2679.63	5.21452	5.72751	5.46607	5.03556	5.70026	5.56181	3	3
comp2268194_c0_seq1|m.65186	19	2159.1	2637.5	3099.9	1844.5	2539.4	2747.4	1670.4	2365.5	2645.4	1827.5	2585.4	3209.8	1660.7	2219.6	2649.4	1745.5	2458.3	2716.8	2632.17	2377.1	2227.1	2540.9	2176.57	2306.87	5.20063	4.60916	4.49737	4.66506	4.40809	4.7881	3	3
comp2247239_c0_seq1|m.35426	14	2592	1918.2	3357.2	2605	1973.3	3471.3	2474.1	1786.8	3207.6	2710.7	1774.2	3416.2	2566	1810.5	3227.6	2438.1	1726.5	3095.5	2622.47	2683.2	2489.5	2633.7	2534.7	2420.03	5.18146	5.20269	5.02726	4.83543	5.1334	5.02299	3	3
comp2276634_c1_seq3|m.82935	17	1865	2991	2978.3	1875.1	2964.7	3008.9	1810.8	2867.5	2776.9	1626.7	2931.8	2731.1	1676.6	2792.7	2564.2	1646.9	2696.2	2537.2	2611.43	2616.23	2485.07	2429.87	2344.5	2293.43	5.15966	5.07284	5.01831	4.4612	4.74819	4.76022	3	3
comp2277351_c1_seq2|m.84968	22	1960.7	2897	2952.4	2155	3248.4	3326	1925.7	2805.9	2837.3	2262.9	3311.6	3364	2303.8	3201.2	3267.2	2282.8	3126.8	3294	2603.37	2909.8	2522.97	2979.5	2924.07	2901.2	5.14372	5.64206	5.09484	5.47032	5.92196	6.02169	3	3
comp2275406_c1_seq7|m.79751	16	2403.4	2616.3	2770.8	2508.4	2734.7	2833	2234.1	2395.2	2685.4	2615.7	2909.9	3163.8	2696.7	2976.4	3246.3	2442.2	2597.5	2954.3	2596.83	2692.03	2438.23	2896.47	2973.13	2664.67	5.13081	5.21982	4.92373	5.31787	6.02133	5.53074	3	3
comp2273216_c0_seq3|m.74900	20	2715.3	2350.4	2718.8	2799.6	2494	2852.9	2704.7	2368.1	2813.9	2763.2	2324.2	3576.7	2829.4	2542.5	2981.7	2731.1	2328	2714.4	2594.83	2715.5	2628.9	2888.03	2784.53	2591.17	5.12686	5.26532	5.30876	5.30239	5.63937	5.37819	3	3
comp2271413_c1_seq5|m.70995	16	2507.7	2023.4	3252.2	2520.8	1959.9	3164.1	2237.6	1762.6	2993.3	2623.3	1955	3602	2026.5	1628.6	2867.4	2227.7	1759.3	2981.3	2594.43	2548.27	2331.17	2726.77	2174.17	2322.77	5.12607	4.94105	4.70753	5.0063	4.40323	4.8211	3	3
comp2107035_c0_seq2|m.6021	22	1787.4	2324.1	3652.2	1899.2	2494.6	3932.4	1842.8	2316.8	3712.5	1879.2	2400.4	4127.3	1832	2329.9	3870.2	1810.9	2382	3790.4	2587.9	2775.4	2624.03	2802.3	2677.37	2661.1	5.11316	5.38146	5.29894	5.14498	5.42233	5.52334	3	3
comp2279615_c0_seq1|m.91158	16	2330.4	2719.7	2658.5	2397.4	2636.7	2694	2129.8	2489	2384.5	2394.2	2889.1	2690.2	2104.3	2553.2	2360.8	2134.1	2502.1	2432.3	2569.53	2576.03	2334.43	2657.83	2339.43	2356.17	5.07687	4.99489	4.71412	4.87974	4.73793	4.89043	3	3
comp2259377_c0_seq1|m.50914	19	2459.3	2267.1	2946.8	2651.3	2542.8	3222.1	2497.2	2329	2991	2419.6	2262.9	2875.3	2717.7	2435.8	3209.2	2619.3	2393.6	3142	2557.73	2805.4	2605.73	2519.27	2787.57	2718.3	5.05356	5.43963	5.26198	4.62534	5.64551	5.64207	3	3
comp1916779_c0_seq1|m.2944	13	2228.1	2376.6	3039.8	2271.1	2451.7	3183.1	2055.4	2264.3	2864.5	1918.1	2097.1	2851.4	1886.4	2050.2	2628.4	2049.2	2210.9	2786.6	2548.17	2635.3	2394.73	2288.87	2188.33	2348.9	5.03466	5.10981	4.83589	4.20233	4.43192	4.87534	3	3
comp2234870_c0_seq1|m.25319	14	2312.5	2797.7	2534.1	2582.2	3211	2675.5	2315.9	2792	2583.5	2442.9	2821	2719.6	2052.3	2475.4	2474.3	2143.6	2668.4	2383.1	2548.1	2822.9	2563.8	2661.17	2334	2398.37	5.03453	5.47357	5.1773	4.88586	4.72693	4.97802	3	3
comp2266397_c0_seq1|m.61967	13	2323.7	2361.6	2931.2	2077.9	2257.5	2618.5	1935.4	2062.6	2478.6	2020.7	2007.7	2403.8	1554.6	1730	1943.6	1658.7	1859.4	2134.8	2538.83	2317.97	2158.87	2144.07	1742.73	1884.3	5.01622	4.49451	4.35959	3.93647	3.52947	3.91103	3	3
Pdu_trscr_assembly_1|3048;|m.12984	8	2241.3	2967.9	2406.5	1550.7	2255.9	1788.9	1859.3	2560	2115	1821.6	2443.8	1802.6	2066.6	2691.9	2105.6	1660.9	2282.4	1958	2538.57	1865.17	2178.1	2022.67	2288.03	1967.1	5.01569	3.61653	4.39842	3.71359	4.63384	4.08289	3	3
comp2277759_c0_seq3|m.86312	23	2676.5	2178	2748.7	2905.1	2500.7	3165.4	3044.1	2435.9	3214	3502.9	2723.7	3416.3	3324.6	2551.1	3331.5	2995.7	2310.9	2954.1	2534.4	2857.07	2898	3214.3	3069.07	2753.57	5.00746	5.53981	5.85218	5.90141	6.21562	5.71526	3	3
comp2278273_c0_seq4|m.88339	40	2194.6	2952.4	2446.2	2113	2941.9	2395	1960.9	2760.8	2340.6	1871.4	2966.2	2455.4	1911.2	2693	2179.5	1904.9	2659.3	2118.6	2531.07	2483.3	2354.1	2431	2261.23	2227.6	5.00087	4.81509	4.75384	4.46328	4.57956	4.62358	3	3
comp2270458_c0_seq1|m.69251	18	2608.7	2229.1	2751.1	2147.8	1954	2219.2	2183.9	1972.9	2352.2	2180.5	2019.1	2400.9	2400.1	2127.7	2576.8	2303.6	2060.7	2369.8	2529.63	2107	2169.67	2200.17	2368.2	2244.7	4.99804	4.08544	4.38139	4.03947	4.79619	4.65907	3	3
comp2273356_c0_seq1|m.75157	29	2111.8	2929.1	2533.8	2260.7	2970.5	2627.5	2099.1	2761.2	2525.6	2448.3	2922.5	2791.6	2194.7	2833.9	2658.3	2121.1	2744.1	2502.8	2524.9	2619.57	2461.97	2720.8	2562.3	2456	4.98869	5.0793	4.97166	4.99535	5.18929	5.09764	3	3
comp2273590_c0_seq3|m.75653	20	2650.1	2753.5	2142.5	2655.5	2678	2088.4	2452.6	2600.1	1964.1	2799.4	3129.8	2300.9	2833	3200.6	2253.9	2656.6	2769.3	2052.5	2515.37	2473.97	2338.93	2743.37	2762.5	2492.8	4.96985	4.79699	4.72321	5.03678	5.59475	5.17402	3	3
comp2278031_c0_seq2|m.87291	21	2837.5	2492.6	2200.5	2983.9	2716.8	2315.6	2758.8	2507.2	2159.6	2672.3	2357	2185.4	2538.4	2157.4	1894.8	2425.8	2038.7	1818.9	2510.2	2672.1	2475.2	2404.9	2196.87	2094.47	4.95964	5.18117	4.99838	4.41536	4.4492	4.34725	3	3
comp2272182_c0_seq2|m.72649	20	2394.5	2070.1	3014.7	2210.2	1888.3	2965.4	2050.8	1822.2	2798.1	3031.5	2585.2	3904	2796.8	2403.6	3583.5	2874.7	2428.8	3698	2493.1	2354.63	2223.7	3173.57	2927.97	3000.5	4.92586	4.5656	4.49051	5.82662	5.92986	6.2278	3	3
comp2262927_c0_seq2|m.56544	15	2624.4	2026.2	2798.4	2729.1	2136.7	2933.3	2606	2025.9	2795.6	2831.7	2182.6	2955.3	2693.1	2035.1	2841.7	2548.6	1932.8	2706.4	2483	2599.7	2475.83	2656.53	2523.3	2395.93	4.9059	5.04078	4.99966	4.87736	5.11031	4.97297	3	3
comp2277374_c0_seq2|m.85051	14	2411.3	1750.6	3229.2	2090	1624.7	2701.7	2507.9	1830.3	3266.6	3466.6	2544.4	4533	3435.7	2508.3	4636.4	2814.6	2135.5	3840.7	2463.7	2138.8	2534.93	3514.67	3526.8	2930.27	4.86777	4.1471	5.11901	6.45288	7.14264	6.08202	3	3
comp2279450_c0_seq1|m.91124	18	2452.2	2474.1	2450.6	2261.9	2422	2354.7	2256.3	2340.6	2302.4	2377	2685.3	2398.1	2511.6	2490.6	2482.7	2302.8	2362.7	2341.2	2458.97	2346.2	2299.77	2486.8	2494.97	2335.57	4.85842	4.54925	4.64412	4.56573	5.05293	4.84767	3	3
comp2254668_c0_seq2|m.44236	12	2171	2376	2819.6	2047.1	2212.8	2578.5	1964.6	2127.5	2488.6	2104.1	2405.5	2728.7	2134.4	2273.5	2678.3	2079.3	2322.6	2630.1	2455.53	2279.47	2193.57	2412.77	2362.07	2344	4.85163	4.41986	4.42966	4.4298	4.78377	4.86517	3	3
comp2275270_c0_seq2|m.79424	13	2891	2227.4	2247.2	2776.4	2131.7	2049.1	2448.7	1966	1872.1	2588.2	2069.7	2045.8	2389.9	1908.7	1837.1	2474.4	1971.6	1864.3	2455.2	2319.07	2095.6	2234.57	2045.23	2103.43	4.85098	4.49664	4.23183	4.10263	4.1421	4.36586	3	3
comp1785956_c0_seq1|m.2259	10	2829.1	1866.4	2662.5	2933.8	1979.7	2710.9	2759.1	1809.1	2475.8	2810.6	1788.8	2475.6	2506	1619.6	2294	2532.4	1629.6	2319.7	2452.67	2541.47	2348	2358.33	2139.87	2160.57	4.84597	4.92787	4.74152	4.32987	4.33376	4.48444	3	3
comp2259211_c0_seq1|m.50658	16	2101.2	2997.8	2242.2	2306.3	3330.8	2285.4	2116.3	3026.8	2159.7	2093.7	3115	2231	2055.5	2969.4	2110.1	2105.7	3024.4	2113.4	2447.07	2640.83	2434.27	2479.9	2378.33	2414.5	4.83491	5.12054	4.91572	4.55306	4.81672	5.0115	3	3
comp2268937_c0_seq1|m.66472	14	2667.7	2377.7	2287.7	2413.1	2199	2150	2988.2	2630.2	2630	3921	3413.4	3439.3	3511.5	3075.5	3121	3030.6	2665.1	2812.6	2444.37	2254.03	2749.47	3591.23	3236	2836.1	4.82957	4.37054	5.55223	6.59345	6.5537	5.88657	3	3
comp2275769_c0_seq3|m.80583	16	1844	2352.9	3055.7	1926.3	2496.7	3199.8	1799.2	2347.1	3075	2142.6	2530.2	3221.1	1704	2232.3	2931.5	1594.8	2132.9	2847.5	2417.53	2540.93	2407.1	2631.3	2289.27	2191.73	4.77655	4.92684	4.86086	4.83103	4.63633	4.54913	3	3
comp2275266_c0_seq21|m.79421	13	2514.3	1945.2	2790.4	2696.2	2138.8	3027.8	2500.9	1953.6	2830.9	2770.3	2249.8	3086.6	2579.9	1994.5	2763.5	2498.2	1998	2814	2416.63	2620.93	2428.47	2702.23	2445.97	2436.73	4.77478	5.08195	4.90401	4.96126	4.95369	5.05765	3	3
comp2141229_c0_seq1|m.7283	12	1759.6	2202.3	3216.7	1770	2176.7	3097.2	1643.6	2130.8	2981.2	1652.6	2065.9	3286.1	1571.5	1960.3	3035.1	1705.4	2073.7	2970	2392.87	2347.97	2251.87	2334.87	2188.97	2249.7	4.72782	4.55268	4.54739	4.28678	4.4332	4.66945	3	3
comp2231610_c0_seq1|m.23229	15	2311	2536.6	2307.5	2323.9	2498.5	2276.6	2145.1	2297.6	2135.5	2241.1	2175.6	2072.1	2291.7	2346.8	2095.1	2216.1	2322.5	2148.5	2385.03	2366.33	2192.73	2162.93	2244.53	2229.03	4.71234	4.58829	4.42798	3.97111	4.54574	4.62655	3	3
comp2260058_c0_seq1|m.51934	16	1871	2421.4	2860.8	2257.7	2833.9	3439.3	2018.5	2450.7	2877.2	1577.9	1867.5	2300.5	1450.2	1772.9	2131.7	1641.3	1990.4	2412.7	2384.4	2843.63	2448.8	1915.3	1784.93	2014.8	4.71109	5.51377	4.94507	3.51646	3.61493	4.18189	3	3
comp2257282_c0_seq1|m.47769	12	2305.8	2706.2	2141.1	2382.5	2718.8	2138.7	2087.8	2531.6	2005.8	2138.4	2586.6	2110.3	1709.2	2098.3	1707.2	1797.7	2112.4	1643.6	2384.37	2413.33	2208.4	2278.43	1838.23	1851.23	4.71102	4.67942	4.45961	4.18317	3.72288	3.84239	3	3
comp2266645_c0_seq1|m.62394	23	3005.8	2524.8	1622.4	3064.5	2587.4	1611.2	2901.8	2491.3	1578	3075	2658.3	1632.8	3109	2643.9	1693.2	3011.3	2581.4	1651.5	2384.33	2421.03	2323.7	2455.37	2482.03	2414.73	4.71096	4.69435	4.69245	4.50802	5.02673	5.01199	3	3
comp2250550_c1_seq1|m.39064	11	2225.2	2584.9	2334.9	2225	2488.2	2433.2	1992.3	2225.9	2122.5	1901.8	2054.8	1964.9	1718.2	1884.9	1890.5	1878.3	2021.2	1965.3	2381.67	2382.13	2113.57	1973.83	1831.2	1954.93	4.70569	4.61892	4.26811	3.62393	3.70863	4.05763	3	3
comp2274999_c0_seq4|m.78837	23	2437.8	2117.2	2583.2	2540.4	2111.3	2892	2440.7	2073.1	2577.6	3198.5	2956.4	3070.1	2905.7	2706	3015	2669.5	2210.2	2810.1	2379.4	2514.57	2363.8	3075	2875.57	2563.27	4.70121	4.87571	4.77342	5.64565	5.82374	5.32028	3	3
comp2265077_c0_seq1|m.59810	10	2489.2	2704	1938.9	2551.5	2698.2	1899.2	2338.2	2502.9	1767.8	2494.9	2657.2	1904.2	2372	2486.5	1824.5	2347.9	2544.3	1837.3	2377.37	2382.97	2202.97	2352.1	2227.67	2243.17	4.69719	4.62054	4.44864	4.31842	4.51158	4.65589	3	3
comp2273193_c0_seq1|m.74830	10	2364.2	2637.1	2113.3	1956.9	2144.4	1747.3	1916.3	2144.4	1744.6	2074.5	2329.4	1816.8	1939.4	2003.5	1671.8	1984.4	2136.7	1760	2371.53	1949.53	1935.1	2073.57	1871.57	1960.37	4.68567	3.78012	3.90771	3.80704	3.79039	4.06891	3	3
comp2256245_c0_seq1|m.46340	16	2027.2	2603.1	2476.9	2014.1	2482.6	2351.2	1932.3	2439.8	2291.3	1603.8	2014.2	1829.8	1738.1	2178.1	1862.8	1704.5	2084.9	1932.1	2369.07	2282.63	2221.13	1815.93	1926.33	1907.17	4.68079	4.426	4.48533	3.33403	3.9013	3.95849	3	3
comp2263011_c0_seq1|m.56689	31	1733.3	3853.3	1516.1	1758.8	4201.2	1642.3	1820.5	4062.4	1534	2018.8	4408.8	1571.2	1955	4174.3	1598.5	1727.5	3881.8	1457	2367.57	2534.1	2472.3	2666.27	2575.93	2355.43	4.67783	4.91359	4.99253	4.89523	5.2169	4.8889	3	3
comp2273645_c0_seq11|m.75781	11	2102.6	2590.1	2376.9	2214.7	2658.1	2487.5	2050.4	2472.4	2290.1	2549.5	2741.5	2392.7	1999.1	2360.7	2260.8	1962	2335	2180.4	2356.53	2453.43	2270.97	2561.23	2206.87	2159.13	4.65603	4.75717	4.58596	4.70239	4.46945	4.48147	3	3
comp2273017_c0_seq1|m.74484	23	1657.9	2324.5	3058.1	1908.6	2732.9	3395.4	1721.4	2469.1	3173.7	1654.8	2311.4	3318.9	1552.8	2175.8	3001.9	1626.2	2291.3	3165.3	2346.83	2678.97	2454.73	2428.37	2243.5	2360.93	4.63687	5.19448	4.95705	4.45845	4.54364	4.90032	3	3
comp2276202_c0_seq3|m.81780	15	2421.2	2391.3	2181	2646	2629.8	2498.1	2425.7	2390.9	2256.2	2685.2	2536.1	2243.1	2773.2	2771.2	2596	2628.1	2621.9	2407.5	2331.17	2591.3	2357.6	2488.13	2713.47	2552.5	4.60591	5.0245	4.7609	4.56818	5.49544	5.29793	3	3
comp2272194_c1_seq9|m.72664	19	2763.7	1532.5	2673.5	2975.9	1604.9	2871	2797.1	1559.4	2687	2720.3	1539.2	2614.7	2662.2	1443.6	2430.8	2727.6	1474.6	2568.5	2323.23	2483.93	2347.83	2291.4	2178.87	2256.9	4.59024	4.81631	4.74118	4.20698	4.41275	4.68439	3	3
comp2272559_c0_seq1|m.73440	16	2485.6	1806.7	2672.7	2974.7	2003.2	2793.6	2327.6	1838.3	2605	2114.9	1778.3	2572	2091.1	1743.4	2506.6	2097.9	1653.4	2388.2	2321.67	2590.5	2256.97	2155.07	2113.7	2046.5	4.58714	5.02294	4.55769	3.95667	4.28077	4.24769	3	3
comp2263661_c0_seq1|m.57595	19	2129.8	2432.2	2387.8	2500.9	2740	2743.2	2246.1	2518.6	2452.3	2378.5	2669	2647.2	2325.6	2699.2	2600	2344.5	2706.9	2610.1	2316.6	2661.37	2405.67	2564.9	2541.6	2553.83	4.57713	5.16035	4.85797	4.70912	5.14737	5.3007	3	3
comp2267011_c0_seq2|m.63019	13	1995.6	2365.2	2572.4	1916.1	2361.5	2608	1815	2263.5	2438.9	1658.2	1999.5	2265.4	1793.9	2245	2392.2	1824.4	2327.2	2461.3	2311.07	2295.2	2172.47	1974.37	2143.7	2204.3	4.5662	4.45036	4.38705	3.62491	4.34152	4.57521	3	3
comp2269060_c0_seq1|m.66718	13	2586.4	1945.1	2360.6	2110.2	1694.5	2122.9	2230.7	1663	2140.2	2823.5	1797.5	2320.6	2377.1	1686.5	2082.3	2318.3	1820.6	2243.7	2297.37	1975.87	2011.3	2313.87	2048.63	2127.53	4.53913	3.83118	4.06159	4.24823	4.14899	4.41588	3	3
comp2200530_c0_seq1|m.13009	14	2192.4	2416.9	2281.5	2486.8	2653	2509.8	2061.7	2261.4	2137	1956.6	2100.6	1913.7	1900.3	2036.8	1939	2008.7	2167.9	2020.2	2296.93	2549.87	2153.37	1990.3	1958.7	2065.6	4.53827	4.94416	4.34848	3.65416	3.96685	4.28733	3	3
comp2206512_c0_seq1|m.14012	2	2249.1	2142.8	2492.6	1998.5	2119.7	2331.8	1804.1	1873.7	2110.9	2218.8	2185	2449.1	1988.8	1922.8	2146.3	1598.5	1732.5	1903.9	2294.83	2150	1929.57	2284.3	2019.3	1744.97	4.53412	4.16882	3.89654	4.19394	4.08958	3.62183	3	3
comp2275504_c0_seq3|m.79997	19	1826.7	2531.9	2459.1	2098.5	2906.1	2727.4	1924.8	2589.3	2486.3	2082.4	2609.8	2848.5	2027.2	2701.9	2783.4	2004.1	2693	2577.1	2272.57	2577.33	2333.47	2513.57	2504.17	2424.73	4.49013	4.99741	4.71217	4.61487	5.07156	5.03274	3	3
comp1194222_c0_seq1|m.762	10	1793.9	2004.7	2965.4	1934.2	2145	2895.8	1860.2	1992.7	2718.4	2193.3	2256.1	3310.1	2076.5	2173.6	2967.4	1875.2	2018.8	2690.8	2254.67	2325	2190.43	2586.5	2405.83	2194.93	4.45476	4.50814	4.42333	4.74878	4.87241	4.55577	3	3
comp2272371_c0_seq1|m.73054	22	2018.6	2384.2	2356.6	2378.1	2698	2674.3	2179.4	2484.3	2497.2	2289.1	2591.8	2549.3	2212.6	2540.3	2480.3	2154.5	2499.8	2511.3	2253.13	2583.47	2386.97	2476.73	2411.07	2388.53	4.45173	5.00931	4.82021	4.54725	4.88301	4.95761	3	3
comp1326513_c0_seq1|m.1923	12	2921	2177.1	1617	2705.7	2052.9	1424	2903.3	2094.2	1641.8	2582.2	1806.9	1700.5	2403.2	1622.1	1405.8	2390.3	1758.2	1356.7	2238.37	2060.87	2213.1	2029.87	1810.37	1835.07	4.42256	3.99599	4.4691	3.72681	3.66644	3.80884	3	3
comp2275027_c0_seq1|m.78898	15	2160.8	1994.6	2552.3	2143.7	2061.1	2495.4	1980.4	1938.6	2306.3	2181.4	2228	2646.5	2015.7	2012.4	2431.8	2007.7	1952.5	2338.3	2235.9	2233.4	2075.1	2351.97	2153.3	2099.5	4.41768	4.33053	4.19043	4.31818	4.36097	4.35769	3	3
comp2254456_c0_seq2|m.43993	21	1641.1	2439	2617.8	1776.2	2425.5	2650.7	1760.2	2403.9	2682.2	2015.4	2765.3	3032.3	1927.5	2743.9	3050	1735.5	2434.9	2707.1	2232.63	2284.13	2282.1	2604.33	2573.8	2292.5	4.41123	4.4289	4.60844	4.78152	5.21258	4.75828	3	3
comp2273204_c0_seq26|m.74869	15	2263	1869.9	2562.1	2507.8	2138.2	2868	2331.1	1907.8	2592	2156.3	1753	2422.4	2203.5	1796.9	2422.8	2296.5	1894.7	2520.3	2231.67	2504.67	2276.97	2110.57	2141.07	2237.17	4.40932	4.85651	4.59807	3.87497	4.33619	4.64343	3	3
comp2261317_c0_seq1|m.54056	14	1684	2052.5	2955.9	1792.8	2230.5	3002.8	1709.8	2159.3	2775.7	1266.5	1688.7	2484.8	1382.3	1717.7	2311	1311.8	1673.1	2244.4	2230.8	2342.03	2214.93	1813.33	1803.67	1743.1	4.40761	4.54117	4.47281	3.32925	3.65287	3.61795	3	3
comp2272495_c0_seq1|m.73308	20	2126.9	2307.4	2143	2317.4	2518.5	2300.2	2092.1	2243.6	2127.4	1737.3	1940.3	1733.5	1749.6	1887.7	1688.6	1902	1998.7	1861.8	2192.43	2378.7	2154.37	1803.7	1775.3	1920.83	4.3318	4.61227	4.3505	3.31157	3.59542	3.98685	3	3
comp2267571_c0_seq4|m.64058	14	2534	1978.6	2048.4	2636.6	1907.3	2004.7	2292.7	1718.7	1803.1	2106	1643.6	1846.6	2024.5	1616.6	1701.4	2226.8	1667.8	1721.6	2187	2182.87	1938.17	1865.4	1780.83	1872.07	4.32107	4.23255	3.91391	3.42485	3.60663	3.88564	3	3
comp2262360_c0_seq1|m.55644	5	2106.6	2225.3	2227.3	1049.3	1100.7	1090.9	1450.7	1498.6	1553.8	1320.1	1343.7	1343.3	1073.3	1106.2	1130.1	1273.9	1323.1	1331.5	2186.4	1080.3	1501.03	1335.7	1103.2	1309.5	4.31988	2.09469	3.03117	2.45233	2.23425	2.71798	3	3
comp2274643_c0_seq2|m.78058	18	2234.3	1728.5	2579.7	2300.7	1753.5	2712.2	2044.7	1490.6	2320.4	2140.5	1595.1	2490.3	1968	1431.3	2285	2118.5	1506.5	2408.7	2180.83	2255.47	1951.9	2075.3	1894.77	2011.23	4.30888	4.37332	3.94164	3.81022	3.83737	4.17449	3	3
comp2228430_c0_seq1|m.21640	22	2381.2	2107.4	2046.7	2823	2379.9	2356.6	2728.5	2346.6	2372.5	2832.3	2469	2578.8	2980.2	2635.1	2552.1	2872.4	2520.4	2440.4	2178.43	2519.83	2482.53	2626.7	2722.47	2611.07	4.30414	4.88592	5.01319	4.82258	5.51367	5.41949	3	3
comp2279272_c0_seq1|m.91086	18	1774.7	1964.9	2790.2	1971.6	2287.4	3351	1738.2	2014.8	2914.2	2020.8	2211.3	3056.5	1798.8	2027.3	3014.9	1810.3	2080.9	3023.3	2176.6	2536.67	2222.4	2429.53	2280.33	2304.83	4.30052	4.91856	4.48788	4.46059	4.61824	4.78388	3	3
comp1244797_c0_seq1|m.1278	10	2169.1	1969.4	2358.9	1950.6	1762.6	2113.2	1963.4	1778.6	2125.3	2098.2	1809.4	2298.4	2147.3	1870.2	2284.2	2007.4	1761	2136.3	2165.8	1942.13	1955.77	2068.67	2100.57	1968.23	4.27918	3.76577	3.94945	3.79804	4.25417	4.08524	3	3
comp2271916_c0_seq1|m.72122	17	2655.4	1832.4	1987.5	2574.4	1807	2037.3	2542.1	1782.4	1996.3	3513.7	2416.6	2848.4	3101	2176.6	2461	2814.4	1972.9	2259.3	2158.43	2139.57	2106.93	2926.23	2579.53	2348.87	4.26463	4.14859	4.25471	5.37252	5.22419	4.87527	3	3
comp2278366_c0_seq5|m.88731	18	1602.3	2585.3	2224.3	1640.9	2682	2279.1	1495.5	2370.4	2173.2	1659.9	2225.5	2159.9	1368.2	2172.3	2005.9	1464	2367.2	1980.3	2137.3	2200.67	2013.03	2015.1	1848.8	1937.17	4.22287	4.26706	4.06509	3.69969	3.74428	4.02076	3	3
comp2272583_c0_seq2|m.73488	21	2383.8	2288.7	1719.3	2486.8	2484.9	1848.3	2329.8	2348.3	1705	2336.4	2073.7	1589.3	2412.5	2293.8	1626.8	2336.3	2351.8	1744.1	2130.6	2273.33	2127.7	1999.8	2111.03	2144.07	4.20963	4.40796	4.29665	3.6716	4.27537	4.45019	3	3
comp2272169_c2_seq2|m.72626	13	2114.4	1952.7	2314.1	2012.1	2034.3	2336	1969.7	1901.3	2220	1931.1	1937.2	2000.5	2024.2	1983.9	2212.3	1994.3	1927.4	2202.9	2127.07	2127.47	2030.33	1956.27	2073.47	2041.53	4.20265	4.12513	4.10003	3.59168	4.19928	4.23738	3	3
comp2274573_c0_seq2|m.77925	21	1333.3	2208.4	2821.1	1605.9	2457.8	3010.5	1380.5	2389.3	2937.2	1538.5	2628.7	3551.1	1548.8	2730.4	3466.7	1541.7	2598.4	3098.6	2120.93	2358.07	2235.67	2572.77	2581.97	2412.9	4.19053	4.57226	4.51467	4.72356	5.22912	5.00818	3	3
comp2259349_c0_seq2|m.50877	9	1878.5	2122.5	2350.2	1527.9	1676	1865.4	1620.3	1739	1963.4	1725.4	1867.6	2178	1685.5	1824.8	2134	1693.2	1825	2106.9	2117.07	1689.77	1774.23	1923.67	1881.43	1875.03	4.18289	3.27643	3.58286	3.53182	3.81037	3.89179	3	3
comp2245355_c0_seq4|m.33464	33	2687.3	1296.9	2359.6	2972.1	1452.4	2606.4	2705.3	1340	2313.2	3193.2	1529.4	2815.5	3081.5	1527.4	2667.2	2976.5	1439	2511.9	2114.6	2343.63	2119.5	2512.7	2425.37	2309.13	4.17802	4.54427	4.28009	4.61328	4.91197	4.7928	3	3
comp2269866_c0_seq13|m.68143	8	1861.5	2138.4	2294.4	1861.6	2101	2397.6	1829.8	1981.3	2263	1606.9	1732.9	1962.2	1671.6	1802.4	2099.6	1832	2028.3	2239.6	2098.1	2120.07	2024.7	1767.33	1857.87	2033.3	4.14542	4.11078	4.08865	3.2448	3.76264	4.22029	3	3
comp2272293_c0_seq1|m.72898	17	1725.6	2288.1	2278.9	1738.4	2380.1	2331.7	1624.4	2181.9	2153.8	1574.4	2106.3	2081.4	1498.2	1949.4	1974.1	1507.5	1999.1	2007.6	2097.53	2150.07	1986.7	1920.7	1807.23	1838.07	4.1443	4.16895	4.01191	3.52638	3.6601	3.81507	3	3
comp2263291_c0_seq2|m.57114	9	1858.8	1856.5	2545.8	1553.5	1670.9	2292.1	1601.1	1625.2	2236.7	1386.9	1348.1	1829.7	1199.3	1199.6	1555	1222.6	1302.6	1689	2087.03	1838.83	1821	1521.57	1317.97	1404.73	4.12355	3.56547	3.6773	2.79357	2.66921	2.91564	3	3
comp2272254_c0_seq4|m.72822	17	2849.2	1245.3	2156.7	3013.4	1021	1984.9	2633.3	1056.7	1984.5	3197.9	1343.3	2865.5	2864.3	1211.3	2202.9	2844.9	1150.6	2177.7	2083.73	2006.43	1891.5	2468.9	2092.83	2057.73	4.11703	3.89045	3.81967	4.53286	4.23851	4.271	3	3
comp2275445_c0_seq2|m.79869	15	1513.8	2836.6	1891.7	1704	3020.3	1921.8	1459.7	2599.7	1619.4	1753.3	3273.4	2026.1	1777.2	3200.7	2063	1827	3223.1	2023.4	2080.7	2215.37	1892.93	2350.93	2346.97	2357.83	4.11104	4.29557	3.82256	4.31628	4.75319	4.89389	3	3
comp2268289_c0_seq5|m.65382	8	2762.5	1648.9	1811.4	2683.6	1590.8	1771.3	2406.6	1379	1543	2712.1	1573.5	1768.1	2258.3	1292.5	1465.2	2328.7	1367.7	1518.1	2074.27	2015.23	1776.2	2017.9	1672	1738.17	4.09833	3.90751	3.58683	3.70483	3.38621	3.60771	3	3
comp2275759_c0_seq17|m.80560	12	2174.7	2523.6	1524	2336.3	2797.2	1673.7	2163.9	2565.9	1491.8	2211.9	2617.6	1500.3	2051.5	2409.2	1399.8	2076.4	2403.2	1393	2074.1	2269.07	2073.87	2109.93	1953.5	1957.53	4.098	4.39969	4.18794	3.87381	3.95632	4.06303	3	3
comp2278518_c0_seq1|m.89695	34	3736.2	823.3	1660.6	3440.1	733.8	1509.6	3515.7	789.8	1498	4246.5	881.7	1704.8	3483.8	771.5	1544	3384.5	769.4	1469.4	2073.37	1894.5	1934.5	2277.67	1933.1	1874.43	4.09655	3.67341	3.9065	4.18176	3.91501	3.89055	3	3
comp2257070_c0_seq2|m.47513	9	2438.3	2121.4	1653.6	1595.2	1527.7	1111.2	2110.1	1984.5	1502.4	2229.5	1947.8	1470.7	2288.1	2210.6	1574.8	1881.3	1834.8	1334.3	2071.1	1411.37	1865.67	1882.67	2024.5	1683.47	4.09207	2.73662	3.7675	3.45655	4.10011	3.49418	3	3
comp2276523_c0_seq2|m.82609	13	2431.2	2313.3	1409	2706	2161.9	1570.7	2333.1	1947.8	1416.6	2088.6	1827.2	1318	2013.3	1882.6	1363.6	2122	1857.8	1348.6	2051.17	2146.2	1899.17	1744.6	1753.17	1776.13	4.05269	4.16145	3.83515	3.20306	3.5506	3.68652	3	3
comp2242407_c0_seq1|m.30845	9	2163	1870.5	2115	1219.3	1024.8	1153.8	949.8	815.7	950.5	260.2	221.5	261.8	220.3	185.8	213.4	209.4	184.2	197.4	2049.5	1132.63	905.333	247.833	206.5	197	4.04939	2.19616	1.82822	0.455018	0.418214	0.40889	3	3
comp1215801_c0_seq1|m.1191	14	1977.9	1746.1	2411.2	2197.5	1970.2	2610.9	2110.9	1843.8	2540.1	2204.4	2144.4	3062.9	2195	2048.6	2966.2	2140.2	1970.8	2568.2	2045.07	2259.53	2164.93	2470.57	2403.27	2226.4	4.04064	4.3812	4.37184	4.53592	4.86721	4.62108	3	3
comp2252790_c0_seq1|m.41691	5	1527.9	2457.8	2139	1248.5	1913	1659.2	1275.7	2022.2	1736.6	964.1	1661.9	1254.3	1147.5	1810.2	1468.4	1051.5	1723	1360	2041.57	1606.9	1678.17	1293.43	1475.37	1378.17	4.03372	3.11576	3.38887	2.37472	2.98798	2.8605	3	3
comp2265326_c0_seq3|m.60204	8	2053.3	2092	1965.4	2588.2	2771.7	2523.9	2811.3	2879.5	2688.7	1401.1	1433.1	1130.7	1424.6	1403.9	1286.6	1617.6	1612.3	1503.9	2036.9	2627.93	2793.17	1321.63	1371.7	1577.93	4.0245	5.09553	5.64048	2.4265	2.77803	3.27514	3	3
comp2277740_c0_seq2|m.86258	17	2753.2	1448.2	1878.3	2629.9	1304.6	1858.1	2444.9	1250.6	1663	2442.5	1256.8	1779.5	2325.1	1174.9	1594.8	2338.6	1200.9	1563.3	2026.57	1930.87	1786.17	1826.27	1698.27	1700.93	4.00408	3.74392	3.60696	3.353	3.43941	3.53043	3	3
comp2272124_c0_seq1|m.72532	13	2294.5	1855.9	1924.9	1969	1634.1	1682.8	1787.4	1521.7	1516	1753.4	1444.9	1465.3	1669.4	1357	1339.8	1640.1	1339.7	1348.6	2025.1	1761.97	1608.37	1554.53	1455.4	1442.8	4.00119	3.41643	3.24791	2.8541	2.94755	2.99466	3	3
comp2266714_c1_seq1|m.62532	11	1861.8	2005.5	2206.8	1732.1	2023	2117.5	1640.7	1906.1	1985.3	1673.6	2094.7	2305.6	1531.6	1775.6	1885.5	1522.8	1710.1	1878.8	2024.7	1957.53	1844.03	2024.63	1730.9	1703.9	4.0004	3.79563	3.72382	3.7172	3.5055	3.53659	3	3
Pdu_trscr_assembly_1|1698;|m.18429	13	1377.6	2143.9	2538.8	1253.8	1929.2	2321.7	1369.6	2165.9	2565.8	1330.1	2293.9	2749	1531.7	2445.1	2940	1410.6	2279.4	2658.1	2020.1	1834.9	2033.77	2124.33	2305.6	2116.03	3.99131	3.55785	4.10696	3.90024	4.66941	4.39201	3	3
comp2277908_c1_seq11|m.86865	17	1311.1	2278.4	2470.3	1220.4	2254.3	2195.4	1176	2233.5	2226.3	1418	2588.9	2675.6	1281.1	2459.7	2453.4	1175.4	2392.6	2263.8	2019.93	1890.03	1878.6	2227.5	2064.73	1943.93	3.99098	3.66475	3.79362	4.08966	4.1816	4.0348	3	3
comp2254167_c0_seq1|m.43587	14	1457	2152.6	2444.4	1251.7	1861.7	2131.2	1238.6	1887.2	2144.1	1198.5	1684.4	1849.5	1125.2	1710.9	1904.9	1197.3	1774.8	2019.1	2018	1748.2	1756.63	1577.47	1580.33	1663.73	3.98716	3.38974	3.54732	2.89621	3.20057	3.45322	3	3
comp2250281_c0_seq1|m.38657	14	2260.3	1594.3	2169.1	2513.3	1784.5	2328.7	2262.2	1607.6	2145.8	2174.6	1572.9	2127.1	2135.6	1554.1	2054.1	2186.9	1596.6	2095.6	2007.9	2208.83	2005.2	1958.2	1914.6	1959.7	3.9672	4.2829	4.04927	3.59523	3.87754	4.06753	3	3
comp2278362_c0_seq1|m.88712	20	1708.9	2217.4	2070.3	1574.9	2270.8	2084.9	1576.5	2109.4	1953.6	1716.6	2321.8	2045.5	1590.3	2112.2	1896.4	1555.5	2135.8	1933.5	1998.87	1976.87	1879.83	2027.97	1866.3	1874.93	3.94935	3.83312	3.79611	3.72332	3.77972	3.89159	3	3
comp2262241_c0_seq1|m.55434	17	1875	2307.8	1764.6	2024.4	2407.3	1886.4	1903	2292.6	1766.6	1842.5	2192.5	1797.2	1859.1	2285.7	1812.4	1995.9	2282.1	1771.4	1982.47	2106.03	1987.4	1944.07	1985.73	2016.47	3.91695	4.08357	4.01333	3.56928	4.0216	4.18535	3	3
comp2247229_c0_seq1|m.35389	16	2361.6	2105.6	1474.5	2899.1	2549.2	1688.5	2485.9	2104	1536.8	2487.3	2156	1686.6	2470.1	2021.2	1613.3	2520.5	2126.3	1553.9	1980.57	2378.93	2042.23	2109.97	2034.87	2066.9	3.9132	4.61272	4.12406	3.87387	4.12111	4.29003	3	3
comp2262441_c0_seq1|m.55760	12	1718.1	2278	1937.5	1899.1	2421.7	2047.3	1638.9	2202.6	1841.2	1696.3	2034.1	1845.4	1692.4	2176.5	1738.2	1675.1	2245.6	1798.6	1977.87	2122.7	1894.23	1858.6	1869.03	1906.43	3.90786	4.11589	3.82519	3.41236	3.78526	3.95697	3	3
comp2278238_c1_seq2|m.88191	14	1700.3	1888.1	2334.7	1758.2	1819.7	2346.2	1620.3	1708.3	2163.2	1853.1	1893.3	2474.7	1631.1	1747.1	2205.9	1696.4	1737.3	2277.8	1974.37	1974.7	1830.6	2073.7	1861.37	1903.83	3.90095	3.82892	3.69669	3.80728	3.76973	3.95157	3	3
comp2262638_c0_seq1|m.56073	21	1635.3	1515.5	2759.6	1796.1	1543.8	2971.6	1809.1	1650.5	3022.7	1964.5	1891	3382.2	1939.6	1757.6	3175	1722.1	1580.1	2859.4	1970.13	2103.83	2160.77	2412.57	2290.73	2053.87	3.89258	4.0793	4.36342	4.42944	4.6393	4.26298	3	3
comp2208429_c0_seq1|m.14341	10	1596.3	2369.2	1936.1	1822.9	2871.5	2255.4	1596.6	2372.2	1906.7	1644	2350.6	2002	1733	2500.5	2057	1612	2499	1971.2	1967.2	2316.6	1958.5	1998.87	2096.83	2027.4	3.88679	4.49186	3.95497	3.66989	4.24661	4.20804	3	3
comp2270797_c0_seq10|m.69872	16	1204.5	1619.4	3049.4	904	1186	2543.6	978.2	1267.9	2555.9	968.6	1466.8	2667.1	886	1206.3	2475.1	946	1270.6	2583.8	1957.77	1544.53	1600.67	1700.83	1522.47	1600.13	3.86815	2.99483	3.23236	3.12271	3.08337	3.32121	3	3
comp2270119_c0_seq15|m.68605	16	1895.7	1895.4	2079.3	1871	1830.9	1963.7	1857.5	1627.3	1934.1	1816.9	1505.6	2005	1636.4	1398.9	1822.6	1613.4	1442.2	1702.8	1956.8	1888.53	1806.3	1775.83	1619.3	1586.13	3.86624	3.66184	3.64762	3.2604	3.27948	3.29216	3	3
comp2261983_c0_seq1|m.55047	20	2219.8	1165.6	2478.2	2490.2	1358.8	2718.8	2340.5	1211.5	2585.8	2785.8	1295.9	3035	2490	1227.6	2752.1	2348.5	1178.7	2568	1954.53	2189.27	2045.93	2372.23	2156.57	2031.73	3.86176	4.24496	4.13153	4.35539	4.36758	4.21704	3	3
comp2268309_c0_seq1|m.65419	25	1536.2	2461.6	1861.7	1777	2802.3	2119.3	1656	2630.6	1996	1935.5	2910.7	2118.2	1847.5	2867.1	2217.1	1709.3	2618.3	2009.3	1953.17	2232.87	2094.2	2321.47	2310.57	2112.3	3.85906	4.3295	4.229	4.26218	4.67947	4.38426	3	3
comp2236614_c0_seq1|m.26450	12	1919.9	1836.6	2099.1	1425.2	1388	1781.2	1779.3	1824.1	2053.9	1987.6	1887	2285.7	2232	2143.8	2393	1902.6	1794.5	2094.6	1951.87	1531.47	1885.77	2053.43	2256.27	1930.57	3.85649	2.96949	3.80809	3.77007	4.5695	4.00706	3	3
comp2265494_c0_seq1|m.60519	7	1917	2356.1	1563.3	1854	2281.1	1467.9	1692.6	2055	1339.1	1657	2067.1	1315.5	1751.4	2136	1415.6	1686.8	2015.8	1354	1945.47	1867.67	1695.57	1679.87	1767.67	1685.53	3.84385	3.62138	3.424	3.08421	3.57996	3.49847	3	3
comp2263822_c0_seq1|m.57945	14	2123.5	1587	2124	1885.1	1376.9	1812.1	1907.8	1424	1932.7	1794.3	1331.2	1881.3	1749.6	1309.7	1776.1	1754	1230.6	1660.2	1944.83	1691.37	1754.83	1668.93	1611.8	1548.27	3.84259	3.27954	3.54369	3.06414	3.26429	3.21356	3	3
comp2267718_c0_seq1|m.64309	20	1145.9	2371.8	2283.6	1202.3	2612.3	2401.1	1107.6	2341.3	2210.2	1460.5	3091.6	3037.1	1471.4	2987	2937.6	1351	2721.8	2701.9	1933.77	2071.9	1886.37	2529.73	2465.33	2258.23	3.82073	4.01739	3.8093	4.64455	4.99291	4.68716	3	3
comp2269029_c1_seq11|m.66661	8	2271.1	1188.7	2331	2652.9	1261.3	2497.2	2505.2	1178.4	2336.5	2154.6	1144.3	2596.4	1979.6	1119.6	2285.2	2220	1163.1	2358.7	1930.27	2137.13	2006.7	1965.1	1794.8	1913.93	3.81381	4.14387	4.0523	3.60789	3.63492	3.97253	3	3
Pdu_trscr_assembly_1|20792;|m.71829	11	1797.7	2139.6	1831	1877.8	2173.3	1892.2	1775.3	2092.4	1749.6	1856.7	2286.4	1888.9	1837.6	2180.8	1798.7	1834.2	2144	1852.8	1922.77	1981.1	1872.43	2010.67	1939.03	1943.67	3.799	3.84133	3.78117	3.69155	3.92702	4.03425	3	3
comp2278534_c0_seq1|m.89879	21	1819	2372	1570	1703.2	2246.4	1565.3	1652.7	2225.5	1528.1	1943.7	2431.1	1621.5	1764.3	2352.7	1493	1624.5	2126.9	1481.5	1920.33	1838.3	1802.1	1998.77	1870	1744.3	3.79419	3.56444	3.63914	3.66971	3.78721	3.62044	3	3
comp2274258_c1_seq4|m.77217	16	1405.2	2202.8	2119.7	1417.3	2258.2	2225.2	1321	2089.8	1982.7	1304	2125.3	1889.8	1240	1965.6	1813.1	1256.2	2033.1	1897.9	1909.23	1966.9	1797.83	1773.03	1672.9	1729.07	3.77226	3.81379	3.63052	3.25526	3.38804	3.58883	3	3
comp2265947_c0_seq1|m.61240	10	1369.5	1807.8	2548.6	1494.3	1932.7	2666.1	1387.3	1778	2487.2	1425.4	2002.3	2719.4	1424.5	1909.3	2624	1393.3	1763.3	2484.7	1908.63	2031.03	1884.17	2049.03	1985.93	1880.43	3.77107	3.93815	3.80486	3.762	4.02201	3.903	3	3
comp2273208_c0_seq2|m.74883	19	2328.8	1471	1921.4	2337	1507.6	1874.1	2211.9	1437.1	1790.6	2474.3	1673.5	2135.3	2296.5	1499	1924.3	2365.1	1565.9	1950.5	1907.07	1906.23	1813.2	2094.37	1906.6	1960.5	3.76798	3.69616	3.66155	3.84523	3.86134	4.06919	3	3
comp2270372_c0_seq1|m.69078	12	1127.2	1905.9	2666	1167.3	2042.5	2758.7	1105.5	1917.5	2660.4	1223.5	2131.1	2974.1	966.6	1753.1	2513.7	994.9	1830.4	2529.4	1899.7	1989.5	1894.47	2109.57	1744.47	1784.9	3.75342	3.85761	3.82566	3.87313	3.53298	3.70471	3	3
comp1197507_c0_seq1|m.1032	4	964.3	2365.1	2349.5	966.5	1755.6	2237.4	981	1781.9	2267.1	866.1	1697.7	2037	689.6	1305.7	1640.8	836.7	1442.3	1787.3	1892.97	1653.17	1676.67	1533.6	1212.03	1355.43	3.74012	3.20547	3.38584	2.81567	2.45467	2.81332	3	3
comp2143411_c0_seq1|m.7656	12	1860.6	2401.2	1394.1	1868.5	2488.6	1468.1	1770.7	2304.6	1307.7	1769.3	2255.8	1165.8	1887.5	2127.7	1178.2	1784.4	2283.9	1312.9	1885.3	1941.73	1794.33	1730.3	1731.13	1793.73	3.72497	3.76499	3.62345	3.17681	3.50597	3.72305	3	3
comp2257415_c0_seq1|m.47965	11	2196.8	1981	1438.9	2499.9	2227.9	1585.8	2235	2074.3	1444.5	2389.8	2211.2	1470.9	2400.6	2173.4	1504.8	2353.6	2159.1	1485.6	1872.23	2104.53	1917.93	2023.97	2026.27	1999.43	3.69915	4.08066	3.87305	3.71597	4.10369	4.15	3	3
comp2273403_c0_seq2|m.75262	18	2171.1	2404.1	1037.2	2573.6	2990.1	1188.8	2066.5	2346.3	1022.8	2316.3	2483.2	1076.3	2097.5	2328.9	1046.8	2172.2	2407.6	962.3	1870.8	2250.83	1811.87	1958.6	1824.4	1847.37	3.69632	4.36434	3.65886	3.59596	3.69486	3.83437	3	3
comp2265656_c0_seq3|m.60780	20	1995.8	2386.5	1211.5	1461	1750.1	920.9	1503.4	1776.1	919.1	2399.6	3133.7	1521.5	2384	2897.9	1436.7	1854.2	2205.2	1096.2	1864.6	1377.33	1399.53	2351.6	2239.53	1718.53	3.68407	2.67063	2.8262	4.3175	4.53561	3.56696	3	3
comp2277933_c1_seq7|m.86947	12	2295.3	1837.2	1448.4	1929.6	1392.5	1109.9	2076.7	1602.7	1312.6	2007.6	1539.4	1086.7	2227.7	1713.8	1242	2076.3	1737.7	1256.8	1860.3	1477.33	1664	1544.57	1727.83	1690.27	3.67557	2.86453	3.36026	2.8358	3.49929	3.50829	3	3
comp2262300_c0_seq2|m.55547	14	1482.5	2463.1	1630	1780.2	2791.1	1894.4	1622.5	2591.9	1771	1801.5	2891.3	1978.4	1858	2828.1	1939.7	1702.2	2667.8	1842.9	1858.53	2155.23	1995.13	2223.73	2208.6	2070.97	3.67208	4.17897	4.02894	4.08274	4.47296	4.29847	3	3
comp2142831_c0_seq2|m.7564	8	1677	1973.4	1911.1	1883.9	2238.7	2172.9	1684.8	1983	1927.4	1544.6	1961.2	1896.1	1666	2014.8	1954.9	1759.1	2077.4	1986.9	1853.83	2098.5	1865.07	1800.63	1878.57	1941.13	3.6628	4.06896	3.76629	3.30594	3.80456	4.02899	3	3
comp2273778_c1_seq23|m.76059	25	1822.5	1546.7	2174.7	1530.8	1357.5	1903.8	1898.9	1567.9	2158.5	2238.6	1915.3	2719.4	2411.9	1882.8	2460.3	1952.5	1628.8	2157.2	1847.97	1597.37	1875.1	2291.1	2251.67	1912.83	3.65121	3.09727	3.78655	4.20643	4.56018	3.97025	3	3
comp2279297_c0_seq1|m.91091	17	1748.4	2104.9	1685.8	1981.3	2488.5	1985.8	1809.1	2209.9	1804.4	1807.3	2253.4	1749.4	1814.7	2172.8	1688.9	1973.5	2340.5	1863	1846.37	2151.87	1941.13	1936.7	1892.13	2059	3.64804	4.17244	3.9199	3.55575	3.83204	4.27363	3	3
comp2250906_c0_seq2|m.39444	9	1878.6	1742.5	1913.3	2226.4	2016.3	2245.2	1975.3	1900	2048.1	2213.8	2155	2292.6	2029.7	1903.8	2110.3	2031.8	1924.1	2029.8	1844.8	2162.63	1974.47	2220.47	2014.6	1995.23	3.64495	4.19332	3.98721	4.07674	4.08006	4.14128	3	3
comp2253409_c0_seq1|m.42588	15	1411.3	2103.4	1997.7	1543.2	2290.7	2162.5	1468.7	2193.7	2037.3	1567.7	2426.7	2289.5	1653.4	2430.5	2303.6	1568.6	2344.5	2178.6	1837.47	1998.8	1899.9	2094.63	2129.17	2030.57	3.63046	3.87565	3.83663	3.84572	4.31209	4.21462	3	3
comp2266171_c0_seq1|m.61557	11	1528.1	2062.2	1920.9	1419.8	1936.8	1935.8	1402.1	1904.9	1857.5	1463.5	1823.2	1746.3	1339.9	1885.2	1741.7	1330.3	1794.8	1715.1	1837.07	1764.13	1721.5	1677.67	1655.6	1613.4	3.62967	3.42063	3.47637	3.08017	3.353	3.34875	3	3
comp2236007_c0_seq2|m.26049	8	1785.5	1302.9	2419.6	1776.7	1296.3	2384.1	1627.4	1199.6	2268.2	1656.9	1162.6	2217.7	1391.8	972.7	1914.1	1499.9	1092.5	2068.7	1836	1819.03	1698.4	1679.07	1426.2	1553.7	3.62756	3.52708	3.42973	3.08274	2.88841	3.22484	3	3
comp2269128_c0_seq1|m.66855	14	1574	1910.4	1997.4	1706.3	2035.8	2082	1553.3	1829.8	1890.2	1519.3	1907	2003.9	1547.8	1877	1883.5	1689.7	2006.2	2066.7	1827.27	1941.37	1757.77	1810.07	1769.43	1920.87	3.61031	3.76428	3.54961	3.32326	3.58354	3.98692	3	3
Pdu_trscr_assembly_1|15577;|m.47320	8	1468.1	1919.1	2092.5	1438.3	1978.6	2150	1417.2	1803.9	2031.4	1476.8	1829.2	2045.3	1517.1	1890.4	2160.6	1429.1	1877.9	2122.3	1826.57	1855.63	1750.83	1783.77	1856.03	1809.77	3.60892	3.59805	3.53561	3.27497	3.75893	3.75633	3	3
comp2274961_c0_seq5|m.78739	8	1241	2053.3	2178.7	1263.6	1976.7	2099.8	1195.6	1949.8	2028.2	1239.8	2300.7	2354.3	1239.2	2021.6	2075.5	1254.4	1967.1	2065.7	1824.33	1780.03	1724.53	1964.93	1778.77	1762.4	3.60451	3.45146	3.4825	3.60759	3.60244	3.65801	3	3
comp2140946_c0_seq1|m.7239	9	1684	1821.1	1963.5	1884.2	1683.8	2025.3	1744	1557.4	1913.6	1732.9	1600.8	2051.1	1743.3	1649.6	1908.7	1725.8	1520.4	1911.4	1822.87	1864.43	1738.33	1794.93	1767.2	1719.2	3.60161	3.61511	3.51037	3.29547	3.57902	3.56835	3	3
comp2275191_c0_seq1|m.79281	9	1852.8	1492.8	2115.9	1763.3	1409.9	1952.4	1801.4	1461.3	1964.7	1735.6	1373.3	1922.9	1760.5	1458.8	1998.9	1775	1423.7	2012.1	1820.5	1708.53	1742.47	1677.27	1739.4	1736.93	3.59694	3.31282	3.51871	3.07944	3.52272	3.60515	3	3
comp2271637_c0_seq1|m.71562	12	1880.5	1601.1	1978.2	1826.4	1673.7	1901.1	1982.8	1721.8	2062.8	2297	2001.9	2521.4	2364.5	2052.9	2490.1	2139	1881.1	2344.8	1819.93	1800.4	1922.47	2273.43	2302.5	2121.63	3.59582	3.49095	3.8822	4.17399	4.66313	4.40363	3	3
comp2278118_c0_seq2|m.87640	15	2140.7	1442.4	1853.2	2319	1620.3	2026.6	2141.3	1550.3	1950.5	2202.7	1531	2131.4	2136.8	1502.6	1937.1	2132.6	1504.8	1917.2	1812.1	1988.63	1880.7	1955.03	1858.83	1851.53	3.58034	3.85593	3.79786	3.58941	3.7646	3.84302	3	3
comp2237053_c0_seq1|m.26700	12	1881.9	1639.2	1878.6	2285.6	1897.2	2357.3	1965.9	1661.3	1973.1	1971.3	1692.3	1917	1990.8	1657.9	1966.4	2024.3	1703	2045.8	1799.9	2180.03	1866.77	1860.2	1871.7	1924.37	3.55624	4.22706	3.76972	3.4153	3.79066	3.99419	3	3
comp2270565_c0_seq2|m.69439	10	1746.4	1263.9	2354.6	1587.6	1088.2	2287.9	1547.2	1086.5	2191.3	1629.9	1087.6	2311.3	1418.1	1017.4	2063.2	1483.2	1032.6	2082.2	1788.3	1654.57	1608.33	1676.27	1499.57	1532.67	3.53332	3.20818	3.24785	3.0776	3.03699	3.18118	3	3
comp2269201_c0_seq1|m.67004	11	1468.4	1269.5	2619.3	1318.1	1214.6	2393.3	823.5	942	1798.6	912.4	1019.3	2088.8	831.3	946.9	1817	932.3	985.6	1862	1785.73	1642	1188.03	1340.17	1198.4	1259.97	3.52825	3.18382	2.3991	2.46053	2.42706	2.61517	3	3
comp2278076_c0_seq2|m.87463	17	1122.7	2345.8	1886.3	1112.8	2317.6	1905.3	1149.3	2386.1	1909	1403.5	2910.7	2320.4	1212.4	2614.5	2105.1	1227.7	2601.8	2058.7	1784.93	1778.57	1814.8	2211.53	1977.33	1962.73	3.52667	3.44862	3.66478	4.06034	4.00459	4.07382	3	3
comp2278589_c0_seq3|m.90346	25	2020.6	1090.9	2229.3	1874.4	984.1	2087.2	1839.3	987.7	2080.2	2126	1075.8	2296.3	1881.9	1010	2029.7	1713.6	928.3	1907.4	1780.27	1648.57	1635.73	1832.7	1640.53	1516.43	3.51744	3.19655	3.30318	3.36481	3.32249	3.14749	3	3
comp2277313_c0_seq3|m.84866	14	1994.1	1296.7	2042.8	2118.2	1333.9	2226.1	1900.2	1280.4	2016	2099.8	1340.8	2114.8	1872.3	1279.2	1888	1867.4	1197.1	1975.7	1777.87	1892.73	1732.2	1851.8	1679.83	1680.07	3.5127	3.66998	3.49798	3.39988	3.40208	3.48712	3	3
Pdu_trscr_assembly_1|2615;|m.68529	14	1677	1653.3	1994.8	1789.7	1758.5	2103	1599.8	1587.7	1989.6	1676.8	1477.2	2141.3	1492.9	1495	2031.9	1538.4	1550.7	2006.8	1775.03	1883.73	1725.7	1765.1	1673.27	1698.63	3.5071	3.65253	3.48485	3.2407	3.38878	3.52566	3	3
comp2142003_c0_seq1|m.7387	12	1670.9	1968.6	1679.1	1849.3	2028	2070.4	1748.9	1795.6	1729.4	1418.9	1355.3	1128.2	1300.9	1262.8	1108.2	1363	1380.7	1265.8	1772.87	1982.57	1757.97	1300.8	1223.97	1336.5	3.50282	3.84417	3.55001	2.38825	2.47884	2.77402	3	3
comp2277399_c0_seq2|m.85129	13	1747.8	1947.6	1617.3	1992.5	2262.7	1755.3	1779.2	2110	1638.7	2082.8	2346	1858.5	1859.6	2290.7	1824.8	1803	2158.9	1698.6	1770.9	2003.5	1842.63	2095.77	1991.7	1886.83	3.49894	3.88476	3.72099	3.8478	4.03369	3.91628	3	3
comp2253302_c0_seq3|m.42443	7			1766.7			2040.1			1829.6			2268.3			2067.3			2236.2	1766.7	2040.1	1829.6	2268.3	2067.3	2236.2	3.49064	3.95573	3.69467	4.16457	4.1868	4.64143	3	1
comp2276966_c0_seq13|m.83854	13	1779.8	1722.5	1783.4	1822.1	1862	1829.7	1637.7	1650.2	1619.7	1895.2	1824.5	1695.4	1714.9	1627.1	1620.9	1700.8	1665.4	1706.4	1761.9	1837.93	1635.87	1805.03	1654.3	1690.87	3.48116	3.56373	3.30345	3.31401	3.35037	3.50954	3	3
comp2280178_c0_seq1|m.91219	5	1652.1	1618	2000.1	1436.2	1413	1777.4	1351.8	1337.9	1610	1645.7	1619.7	1955	1376.5	1361.5	1633.5	1533.5	1542.6	1875.1	1756.73	1542.2	1433.23	1740.13	1457.17	1650.4	3.47095	2.99031	2.89425	3.19486	2.95112	3.42555	3	3
comp2257633_c0_seq1|m.48279	10	1718.9	1815	1727.6	1921.6	1863.2	1619.9	1691	1699.2	1575.2	1693.5	1692.9	1556.7	1597.6	1670.2	1539.6	1622	1580.5	1408.4	1753.83	1801.57	1655.13	1647.7	1602.47	1536.97	3.46522	3.49321	3.34235	3.02515	3.24539	3.19011	3	3
comp2277816_c0_seq2|m.86536	24	1895.6	1547.7	1812.4	3186	2416.5	3144.4	2987.4	2289.4	2888.6	2316.5	1951.4	2282.1	2054.6	1666.9	2077.3	2018.8	1586.7	2072.8	1751.9	2915.63	2721.8	2183.33	1932.93	1892.77	3.4614	5.65337	5.49637	4.00857	3.91467	3.9286	3	3
comp2274031_c0_seq3|m.76707	15	1233.4	1804.8	2216.4	1257.7	1822.3	2269.2	1111.1	1713.6	2128.6	1022.6	1591.6	2164.9	996.3	1536.4	2033.4	1032.1	1550.4	1969.6	1751.53	1783.07	1651.1	1593.03	1522.03	1517.37	3.46067	3.45734	3.33421	2.92479	3.0825	3.14942	3	3
comp2277176_c0_seq2|m.84466	23	2617.7	1215.4	1415.4	2784.7	1397.2	1568.5	2570.1	1264.5	1459.7	3158.5	1565.3	1619.8	2860.7	1419.5	1533.1	2564.4	1247.2	1431.8	1749.5	1916.8	1764.77	2114.53	1937.77	1747.8	3.45666	3.71665	3.56375	3.88225	3.92446	3.62771	3	3
comp2267691_c0_seq1|m.64257	11	1435.3	1680.3	2131.3	1584	1731.8	2181.1	1411.4	1566.9	1997.2	1519.5	1726.7	2210.2	1516.7	1719.5	2162.5	1437.9	1577.5	2118.1	1748.97	1832.3	1658.5	1818.8	1799.57	1711.17	3.4556	3.55281	3.34915	3.33929	3.64457	3.55167	3	3
comp2272547_c0_seq4|m.73421	18	1411.7	1586	2233.3	1448.6	1736.5	2362.8	1498.8	1754.5	2335.9	1884.1	2059.2	2617.7	1620.1	1707.1	2236.1	1416.3	1583.5	2139.8	1743.67	1849.3	1863.07	2187	1854.43	1713.2	3.44513	3.58577	3.76225	4.0153	3.75569	3.55589	3	3
comp2272491_c1_seq4|m.73302	15	1944.9	1626.4	1651.5	1765.9	1447.9	1506.3	1702.1	1481.1	1490.7	1685.8	1454.8	1725.4	1681.7	1360	1463.6	1693.1	1360.7	1449.1	1740.93	1573.37	1557.97	1622	1501.77	1500.97	3.43973	3.05074	3.14614	2.97797	3.04145	3.11539	3	3
comp2276741_c0_seq2|m.83166	13	1731.6	1447.3	2039.9	1794.7	1553.6	2086.4	1658.7	1400.3	1857	1701.8	1344.2	1858.2	1569.3	1295.2	1661.3	1581	1294.3	1784.5	1739.6	1811.57	1638.67	1634.73	1508.6	1553.27	3.4371	3.5126	3.3091	3.00135	3.05529	3.22394	3	3
comp2277075_c0_seq2|m.84155	17	1858.5	1729.5	1608.5	2066.4	1754.1	1625.8	2002.2	1744.3	1684.7	2389.1	2093.7	1945.7	2083.3	1797.5	1723.4	2172.8	1855.9	1813.2	1732.17	1815.43	1810.4	2142.83	1868.07	1947.3	3.42241	3.5201	3.6559	3.93421	3.7833	4.04179	3	3
comp2224014_c0_seq1|m.19704	9	2205.1	1791.9	1178.7	2091.7	1639.6	1130.7	1791.8	1450.9	1016.3	1395.2	1229.5	760	1625.7	1343.2	953.1	1908.8	1549.4	1075.5	1725.23	1620.67	1419.67	1128.23	1307.33	1511.23	3.40871	3.14245	2.86686	2.07142	2.64767	3.13669	3	3
comp2277977_c1_seq3|m.87126	14	1602.1	1785.5	1779.9	2052.4	2349.9	2370.7	1833.1	2036.2	2035.6	1721.8	1929.7	1990.1	1753.7	1840.3	1878.4	1735.9	1927.6	1915.7	1722.5	2257.67	1968.3	1880.53	1824.13	1859.73	3.40331	4.37759	3.97476	3.45263	3.69432	3.86004	3	3
comp2267494_c1_seq2|m.63934	15	2070.3	1475.3	1611.9	2191.8	1535.3	1713.5	2019.2	1447	1605.8	1989.7	1393.9	1618.8	1906	1348.6	1507.3	1960.2	1357.1	1516.4	1719.17	1813.53	1690.67	1667.47	1587.3	1611.23	3.39672	3.51642	3.41411	3.06144	3.21468	3.34425	3	3
comp2266808_c0_seq1|m.62719	11	1939.1	1713.4	1503.9	2180.4	1871.5	1643.8	2079.3	1794.6	1514.3	1985.9	1730.4	1506.9	2115.3	1854.2	1489.1	1920.5	1722.6	1528.7	1718.8	1898.57	1796.07	1741.07	1819.53	1723.93	3.396	3.6813	3.62695	3.19657	3.68501	3.57817	3	3
comp2232290_c0_seq2|m.23637	10	2300.2	1147.3	1694.1	1896.7	824.8	1328	1856.1	1047.2	1462.1	2041.7	1278.8	1709.1	2129.4	1329.5	1794.7	2113.5	1073.4	1754.9	1713.87	1349.83	1455.13	1676.53	1751.2	1647.27	3.38625	2.61731	2.93848	3.07809	3.54661	3.41904	3	3
comp2280591_c0_seq1|m.91233	8	1471.5	1994.5	1673.2	1507.3	2063	1741.3	1405	1870	1649	1346.3	1662.5	1533.1	1148.5	1392.4	1360.1	1149.1	1479.5	1325.5	1713.07	1770.53	1641.33	1513.97	1300.33	1318.03	3.38467	3.43304	3.31449	2.77962	2.6335	2.73569	3	3
comp2273417_c0_seq5|m.75297	9	1564.2	1730.9	1830.5	1737.2	1886.5	2071.3	1556.7	1778	1875.5	1756.4	1961	2099	1615.7	1859.7	1964	1587.3	1864.9	1960	1708.53	1898.33	1736.73	1938.8	1813.13	1804.07	3.37571	3.68084	3.50714	3.55961	3.67204	3.7445	3	3
comp2264743_c0_seq3|m.59295	17	2339	1318.7	1457.7	2596.5	1516.1	1666.8	2336	1323.8	1423.8	2593.9	1522.8	1593.7	2433.6	1408	1501.8	2477.4	1420	1552.7	1705.13	1926.47	1694.53	1903.47	1781.13	1816.7	3.369	3.73539	3.42192	3.49474	3.60724	3.77072	3	3
comp2278542_c0_seq1|m.89926	16	1520.8	1726.7	1863.1	1799.2	1950.8	2196.7	1605.5	1787.7	1986.4	1554.4	1808.8	1955.4	1417.6	1703	1813.6	1414.3	1650.1	1785	1703.53	1982.23	1793.2	1772.87	1644.73	1616.47	3.36584	3.84352	3.62116	3.25496	3.33099	3.35512	3	3
comp2273285_c0_seq1|m.75026	11	1442.5	1970.4	1682.1	1391.4	1782.5	1733.8	1357.7	1653.6	1653.5	1319.5	1582.1	1651	1610.4	1907	1885.1	1460.2	1817.8	1770.8	1698.33	1635.9	1554.93	1517.53	1800.83	1682.93	3.35556	3.17199	3.14001	2.78617	3.64713	3.49307	3	3
comp2275857_c0_seq4|m.80829	14	1845.8	1605.6	1639.5	1816.7	1389.6	1671.9	1839.7	1442.4	1639.1	2408.2	1918	1841.7	2102.1	1641.4	1807.6	1837	1440	1645.8	1696.97	1626.07	1640.4	2055.97	1850.37	1640.93	3.35286	3.15292	3.3126	3.77472	3.74745	3.4059	3	3
comp2279536_c0_seq1|m.91140	7	1813.8	1593.1	1652.7	1881.6	1647	1635	1664.3	1430.7	1578.3	1537.1	1265.7	1430.8	1309.4	1132.6	1332.4	1432	1209.1	1374.9	1686.53	1721.2	1557.77	1411.2	1258.13	1338.67	3.33225	3.33738	3.14573	2.59094	2.54803	2.77852	3	3
comp2273190_c0_seq1|m.74828	9	1758.3	1840.6	1459.3	1808.1	1893.9	1554	1697.7	1713.8	1436.6	1788.3	1857.7	1542.2	1741.1	1853	1468.5	1618.4	1670.2	1387.4	1686.07	1752	1616.03	1729.4	1687.53	1558.67	3.33132	3.3971	3.2634	3.17515	3.41767	3.23515	3	3
comp2268857_c0_seq2|m.66328	8	2659	1230.8	1103.9	2614.1	1314.8	1190.9	2453.9	1194.6	1090.3	2337.8	1167.2	1106.5	1955.8	1021.4	953.8	2095.3	1023.1	967.9	1664.57	1706.6	1579.6	1537.17	1310.33	1362.1	3.28884	3.30907	3.18982	2.82222	2.65375	2.82716	3	3
comp2273667_c0_seq6|m.75821	16	1433.3	2222.3	1294.3	1379.7	2186.1	1251.2	1320.7	2132.7	1231.5	1463.8	2494.6	1400.9	1452.6	2388.5	1380.1	1438.4	2267.5	1303.4	1649.97	1605.67	1561.63	1786.43	1740.4	1669.77	3.26	3.11337	3.15354	3.27987	3.52474	3.46574	3	3
comp2274109_c2_seq4|m.76877	10	1683.1	1436.2	1816.8	1230.3	1210.2	1665.5	1107.3	1085.5	1562.5	1167.6	988.1	1551.9	1243.1	1157.3	1645.3	1274.9	1160.4	1555.3	1645.37	1368.67	1251.77	1235.87	1348.57	1330.2	3.25091	2.65383	2.5278	2.26903	2.73118	2.76094	3	3
comp2246502_c0_seq1|m.34680	9	1380	1083	2462.9	1481.4	1077.3	2565.3	1390.2	1042.8	2481.1	1402	1107	2401.1	1189.5	1025.3	2175.9	1205.7	962.8	2192.6	1641.97	1708	1638.03	1636.7	1463.57	1453.7	3.24419	3.31179	3.30782	3.00496	2.96409	3.01728	3	3
comp2252746_c0_seq1|m.41651	10	1538.9	1523.3	1850.1	1852	1684.6	2181.1	1560	1402.9	1761.7	1523.4	1517.3	1831.5	1519.6	1437.5	1770.2	1554.3	1440.6	1886.2	1637.43	1905.9	1574.87	1624.07	1575.77	1627.03	3.23524	3.69551	3.18026	2.98176	3.19132	3.37705	3	3
comp2275478_c0_seq7|m.79935	21	1576.8	2280.3	1054.8	1659.7	2399.1	1144.4	1531.2	2281.7	1054.6	1841.8	2729.5	1170.3	1739.2	2764.9	1182.7	1754.6	2598.2	1102.4	1637.3	1734.4	1622.5	1913.87	1895.6	1818.4	3.23497	3.36298	3.27645	3.51383	3.83906	3.77425	3	3
comp2271635_c0_seq2|m.71555	16	1322.5	1152.2	2436.4	1277.6	1150.5	2360.8	1275.8	1122.7	2385.5	1638.7	1166	2643.7	1202.5	1103.9	2275.5	1195.1	1086.8	2187.3	1637.03	1596.3	1594.67	1816.13	1527.3	1489.73	3.23444	3.0952	3.22025	3.33439	3.09316	3.09207	3	3
comp2256558_c1_seq1|m.46706	10	2560	896.7	1443.7	2592.5	892.4	1516.2	2490.3	871.8	1468.9	2331.2	888.7	1382.6	2217	832.4	1228.6	2336.7	934	1345.1	1633.47	1667.03	1610.33	1534.17	1426	1538.6	3.2274	3.23236	3.25188	2.81671	2.888	3.1935	3	3
comp2269850_c0_seq1|m.68122	12	1228.9	1996.7	1672.6	1094	1739.6	1525.8	1083.3	1740.4	1495.8	1051.8	1697.8	1427.7	1155.2	1825.7	1581.1	1085.3	1743.5	1505.6	1632.73	1453.13	1439.83	1392.43	1520.67	1444.8	3.22595	2.81761	2.90758	2.55649	3.07973	2.99881	3	3
comp2268115_c0_seq2|m.65034	8	2019.9	1523.5	1350.4	1894.5	1394.1	1313.1	1633.8	1186.6	1110.5	1598.8	1248.3	1096	1380.6	1047.2	989.6	1489.4	1169.5	1025.7	1631.27	1533.9	1310.3	1314.37	1139.13	1228.2	3.22305	2.97421	2.646	2.41316	2.30703	2.54923	3	3
comp2252638_c0_seq1|m.41545	25	1772.4	1865.4	1242.8	1922.4	1867.4	1281.2	1814.6	1778.6	1207	1860.4	2141.6	1305.7	1875.2	1946.8	1304.5	1773.5	1837.8	1267.5	1626.87	1690.33	1600.07	1769.23	1708.83	1626.27	3.21436	3.27753	3.23115	3.24829	3.46081	3.37546	3	3
comp2251386_c0_seq2|m.40044	5	1854.2	1967.7	1028.6	2299.2	2501.1	1151	1618.2	1674.9	907.3	1285.5	1298.4	750.7	1155.4	1128.6	666.8	1516.6	1567.4	835.7	1616.83	1983.77	1400.13	1111.53	983.6	1306.57	3.19453	3.8465	2.82741	2.04076	1.99203	2.71189	3	3
comp2275551_c0_seq2|m.80110	15	1160.1	1586.3	2099.5	1207.2	1648.4	2165	1119.3	1534.3	2026.7	1094.3	1488.7	2108.5	1144.4	1563.6	2065.5	1142.3	1549.9	2073.3	1615.3	1673.53	1560.1	1563.83	1591.17	1588.5	3.1915	3.24496	3.15044	2.87118	3.22251	3.29707	3	3
comp2277735_c0_seq26|m.86235	23	1797.2	1098.9	1945.8	1826.2	1138.7	1958.1	1771.9	1104.5	1882.6	1976.1	1204	2022.6	1833.5	1153	1896.4	1794.8	1094.3	1865.7	1613.97	1641	1586.33	1734.23	1627.63	1584.93	3.18887	3.18188	3.20342	3.18403	3.29636	3.28967	3	3
comp2228369_c0_seq1|m.21627	12	1202.5	2200.2	1437.3	1352.3	2675.8	1555.7	1239.1	2216.5	1416.9	1185.2	2182.3	1333.8	1281.7	2198.3	1553.8	1305.3	2366.6	1521.1	1613.33	1861.27	1624.17	1567.1	1677.93	1731	3.18762	3.60897	3.27982	2.87717	3.39823	3.59284	3	3
comp2271244_c0_seq1|m.70676	12	2082.5	1244.4	1504.9	2721.3	1488.4	1767.9	2094.1	1224.1	1324	2222.3	1264.4	1456.8	2053.5	1270.2	1375.6	2308.2	1345.2	1547.1	1610.6	1992.53	1547.4	1647.83	1566.43	1733.5	3.18222	3.8635	3.1248	3.0254	3.17242	3.59803	3	3
comp2269721_c0_seq1|m.67908	16	1055.7	2078.6	1692.5	1232.3	2338.7	1836.9	1084	2244.9	1663.1	1172.4	2525.3	1846.4	1015.6	2061.3	1616.4	1064.2	2152.9	1674.2	1608.93	1802.63	1664	1848.03	1564.43	1630.43	3.17892	3.49528	3.36026	3.39296	3.16837	3.3841	3	3
comp2274939_c0_seq2|m.78686	12	1226.7	1692.7	1896.2	1388.6	1875.4	2053.3	1291.5	1803.9	1890.8	1319.3	1912	1997.5	1323	1843.5	1851.4	1298.7	1834.2	1859.7	1605.2	1772.43	1662.07	1742.93	1672.63	1664.2	3.17155	3.43672	3.35635	3.2	3.3875	3.45419	3	3
comp2263015_c0_seq1|m.56697	9	1244.6	1559.4	2001.2	1400.3	1739.1	2113.3	1270.9	1553.9	1942.3	1296.7	1703.8	1991.6	1242.6	1615.9	1941.5	1295.3	1576.9	1962.8	1601.73	1750.9	1589.03	1664.03	1600	1611.67	3.1647	3.39497	3.20887	3.05514	3.2404	3.34515	3	3
comp1226347_c0_seq1|m.1231	12	1678.8	1723.1	1334.8	1659.4	1643.8	1381.3	1693.1	1639	1320.3	1964	1930.8	1540.3	1654.1	1645.3	1310.7	1538.2	1541	1201.4	1578.9	1561.5	1550.8	1811.7	1536.7	1426.87	3.11959	3.02773	3.13166	3.32625	3.1122	2.96158	3	3
comp2272920_c0_seq1|m.74280	11	1508.2	1046.5	2176	1572.3	1076.7	2266	1610	1136.8	2340.6	1966.5	1326.8	2837.7	1774.1	1249.1	2553.1	1547.9	1128.8	2244.8	1576.9	1638.33	1695.8	2043.67	1858.77	1640.5	3.11563	3.17671	3.42447	3.75214	3.76446	3.405	3	3
comp2269593_c0_seq3|m.67692	13	1579.8	988.5	2152.3	1531.5	936.6	2115.1	1467.7	908	2007.9	1576.6	1045.6	2272.2	1630.8	928.5	2182.5	1488.9	885.9	2030.6	1573.53	1527.73	1461.2	1631.47	1580.6	1468.47	3.10898	2.96225	2.95073	2.99535	3.20111	3.04793	3	3
comp2265328_c0_seq2|m.60206	11	1550.7	1366.3	1776.7	1427.2	1247.2	1605	1377	1216.6	1602.6	1607.3	1403.2	1749.6	1394.3	1253	1675.2	1399.6	1242.1	1640	1564.57	1426.47	1398.73	1586.7	1440.83	1427.23	3.09127	2.7659	2.82458	2.91316	2.91804	2.96235	3	3
comp2269601_c0_seq3|m.67709	12	2167.6	1490.7	1031.6	2464.5	1706	1214.7	2321.1	1592.3	1120.4	2533.1	1654.1	1151.4	2554.3	1632.8	1161.5	2272.3	1545.4	1086.5	1563.3	1795.07	1677.93	1779.53	1782.87	1634.73	3.08876	3.48061	3.3884	3.2672	3.61075	3.39303	3	3
comp2265471_c0_seq5|m.60488	9	1256.1	1735.1	1687	1253.3	1774	1611.3	1297.6	1793.5	1653.1	1277.5	2132.9	2033.7	1396.6	1923.9	1859.9	1347.3	1855.5	1710.4	1559.4	1546.2	1581.4	1814.7	1726.8	1637.73	3.08106	2.99806	3.19346	3.33176	3.4972	3.39926	3	3
comp2265350_c0_seq1|m.60250	13	1543.8	1876.8	1244.8	1604.3	1850.6	1261.5	1486.9	1835.9	1202	1234.8	1789.4	1062.7	1271	1554.1	1064.4	1264.4	1494.6	1046.1	1555.13	1572.13	1508.27	1362.3	1296.5	1268.37	3.07263	3.04835	3.04577	2.50116	2.62573	2.6326	3	3
comp2246514_c1_seq1|m.34691	11	1680.9	1689.5	1292.1	1791.4	1751.4	1370.5	1756.5	1704	1341.7	1958.3	1905.8	1515.2	1718.4	1721.9	1281.6	1737.2	1702.1	1272.8	1554.17	1637.77	1600.73	1793.1	1573.97	1570.7	3.07072	3.17561	3.2325	3.29211	3.18767	3.26012	3	3
comp2275662_c1_seq10|m.80344	24	1280.4	1397.5	1983	1369.8	1513.4	2019.3	1366.9	1519.5	2099.3	1385.9	1537.7	2353	1318.7	1558.9	2091.1	1367.6	1470.1	2037.7	1553.63	1634.17	1661.9	1758.87	1656.23	1625.13	3.06966	3.16863	3.35602	3.22925	3.35428	3.3731	3	3
comp2263070_c0_seq1|m.56781	13	973.2	1236.6	2439.7	1002.1	1335.1	2581.8	946.8	1291.5	2369.8	966.4	1501.5	2489.2	957.2	1339.1	2309.5	963	1297.2	2377.2	1549.83	1639.67	1536.03	1652.37	1535.27	1545.8	3.06216	3.17929	3.10184	3.03372	3.1093	3.20844	3	3
comp2268172_c0_seq1|m.65149	12	1913.2	1222	1506.3	2023.2	1328.8	1606	1807.3	1239.8	1435.8	1899.1	1340.7	1522.5	1717.1	1145.8	1317.8	1754.4	1171.6	1359.6	1547.17	1652.67	1494.3	1587.43	1393.57	1428.53	3.05689	3.2045	3.01757	2.9145	2.82232	2.96504	3	3
comp2254470_c0_seq1|m.44006	15	1184	1621.8	1829.8	1060.5	1478.9	1711.7	1077.6	1466.1	1650.5	1168.9	1486.2	1961	1139.3	1580	1728.8	1199.6	1566.5	1777.1	1545.2	1417.03	1398.07	1538.7	1482.7	1514.4	3.053	2.74761	2.82324	2.82503	3.00284	3.14327	3	3
comp2266931_c0_seq5|m.62893	9	1340	1661.6	1631.7	1006.5	1224	1230	1425.9	1736.2	1696.1	1552.9	1988.8	2075.5	1321.5	1664.8	1722.4	1102.4	1402.5	1393.9	1544.43	1153.5	1619.4	1872.4	1569.57	1299.6	3.05149	2.23662	3.27019	3.4377	3.17876	2.69743	3	3
comp2257939_c0_seq1|m.48703	7	1126.4	1200.7	2298.1	1041.7	1118.9	2082.5	946.3	999.5	1877.4	850.6	804.3	1566.8	818.8	809.1	1607.4	859.2	887.6	1761.1	1541.73	1414.37	1274.4	1073.9	1078.43	1169.3	3.04615	2.74244	2.57351	1.97166	2.1841	2.42698	3	3
comp2226643_c0_seq1|m.20830	12	1521.5	1241.9	1861.3	1631.8	1349.6	1953.4	1453.3	1227.5	1755	1488.6	1221.3	1770.7	1296.6	1026.9	1577.4	1355.5	1089.9	1614.5	1541.57	1644.93	1478.6	1493.53	1300.3	1353.3	3.04582	3.1895	2.98586	2.74211	2.63343	2.80889	3	3
comp2226635_c0_seq1|m.20829	7	2232.6	695.5	1695.7	2464.1	756.3	1856.8	2114.7	643.1	1610.3	2281.9	808.6	1668.8	2141.6	681.9	1634	2064.5	702.1	1663.9	1541.27	1692.4	1456.03	1586.43	1485.83	1476.83	3.04523	3.28154	2.94029	2.91267	3.00918	3.06529	3	3
comp2274700_c0_seq3|m.78156	14	1436	858.3	2320	1485.6	916.7	2335.4	1362.2	807.8	2127.9	1414.5	786.9	2103.2	1212	739.9	1917.7	1277.4	769.6	2020	1538.1	1579.23	1432.63	1434.87	1289.87	1355.67	3.03897	3.06211	2.89304	2.63439	2.6123	2.8138	3	3
gi|613484551	23	1789.3	1280.5	1529.7	1757.9	1233.8	1549.7	1992	1424.8	1716.6	2529.5	1774.3	2134.5	2315.3	1690.9	2016.3	1945.2	1378.3	1657.2	1533.17	1513.8	1711.13	2146.1	2007.5	1660.23	3.02923	2.93524	3.45544	3.94021	4.06569	3.44596	3	3
comp2271595_c0_seq2|m.71452	14	1620.2	1647.1	1330	1545.6	1561.3	1255.2	1615.9	1685	1392.6	1922.3	2139.6	1370	1829.7	1863	1491.5	1634.7	1660.6	1345.8	1532.43	1454.03	1564.5	1810.63	1728.07	1547.03	3.02778	2.81935	3.15933	3.3243	3.49976	3.211	3	3
comp2275720_c0_seq4|m.80482	8	1318	1421.1	1851.9	1248.8	1344.2	1733.8	1251.3	1306.2	1713.6	1312.4	1338.7	1790.9	1190.6	1263.7	1671.4	1168.4	1271	1665.7	1530.33	1442.27	1423.7	1480.67	1375.23	1368.37	3.02363	2.79654	2.875	2.71848	2.78519	2.84016	3	3
comp2244968_c0_seq1|m.33120	10	2078.7	1337.9	1167.3	1894.5	1220.4	1231.3	1793.9	1191.3	1112.1	1652.6	1129.9	966.2	1515.3	1029.8	913.5	1738.6	1164.4	1122.5	1527.97	1448.73	1365.77	1249.57	1152.87	1341.83	3.01895	2.80907	2.75801	2.29419	2.33484	2.78509	3	3
comp1933561_c0_seq1|m.3244	8	2201	1306.6	1071.2	2206.2	1297.4	984.2	1967.4	1191.2	884.9	2466.9	1500.7	1008.9	1923.9	1210.5	878	2182.7	1321.9	1012.5	1526.27	1495.93	1347.83	1658.83	1337.47	1505.7	3.01559	2.90059	2.7218	3.04559	2.7087	3.12521	3	3
comp1194343_c0_seq1|m.800	15	1700.3	1441	1434.1	1725.2	1487.1	1555.5	1688.6	1399.9	1418.9	1707.4	1348.4	1463	1644.7	1390.5	1450.7	1645.5	1398.5	1441	1525.13	1589.27	1502.47	1506.27	1495.3	1495	3.01335	3.08157	3.03406	2.76548	3.02835	3.103	3	3
comp2268225_c0_seq5|m.65245	8	1900.4	1189.7	1479.8	1773.8	1129.6	1455.6	1759.2	1084.5	1474.8	1733.4	992	1400.8	1986.4	1172.2	1608.3	1817.3	1168.4	1483.4	1523.3	1453	1439.5	1375.4	1588.97	1489.7	3.00973	2.81735	2.90691	2.52521	3.21805	3.092	3	3
comp2275191_c1_seq2|m.79282	8	1668.9	1331.1	1566.2	1724.9	1296.5	1267.8	1678.3	1285.4	1211.6	1799.1	1294	1148.9	1746.7	1338.5	1170.2	1720.8	1350.1	1252.3	1522.07	1429.73	1391.77	1414	1418.47	1441.07	3.00729	2.77223	2.81051	2.59608	2.87275	2.99106	3	3
Pdu_trscr_assembly_1|200732;|m.91055	13	1607.8	1528.9	1429.3	1521.5	1426.8	1314.1	1231.3	1199.1	1142.6	1361	1341.7	1479.4	1198.2	1160.9	1236.4	1392.6	1366.6	1390.9	1522	1420.8	1191	1394.03	1198.5	1383.37	3.00716	2.75491	2.40509	2.55942	2.42726	2.8713	3	3
comp2275110_c1_seq5|m.79090	15	775.2	2029.7	1755.3	837.9	2143.8	1905.5	740.2	1880.5	1723.4	851.4	2049	1685.6	795.1	1834.4	1637.9	786.1	1964.9	1752.1	1520.07	1629.07	1448.03	1528.67	1422.47	1501.03	3.00334	3.15874	2.92414	2.80661	2.88085	3.11552	3	3
comp2263873_c0_seq9|m.58029	5	1375.6	1248.7	1932.2	970	736.6	1209.6	1202	1015.6	1623.8	1149.7	928.9	1508.5	977.7	805.6	1326.9	1202.3	1135.1	1777.7	1518.83	972.067	1280.47	1195.7	1036.73	1371.7	3.00091	1.88482	2.58576	2.19529	2.09964	2.84708	3	3
comp2267761_c0_seq6|m.64393	12	2226.7	1217.5	1106.8	2265.9	1236.9	1208.5	1979.5	1111.2	1103.8	2123.9	1132.7	1275.6	1863.1	952.6	1024.2	1849.9	999.5	1027.6	1517	1570.43	1398.17	1510.73	1279.97	1292.33	2.99728	3.04505	2.82344	2.77368	2.59225	2.68235	3	3
comp2243632_c0_seq1|m.31907	13	1569.6	1284.8	1696	1662.7	1400.3	1868.2	1485.6	1305.7	1767.1	1856.9	1226.4	1681.3	1433.9	1259.1	1651.5	1457.5	1226	1634.7	1516.8	1643.73	1519.47	1588.2	1448.17	1439.4	2.99689	3.18718	3.06839	2.91591	2.9329	2.9876	3	3
comp2270517_c0_seq1|m.69357	11	1736.4	1524	1289.5	1957.1	1718.8	1510.5	1804.8	1600.8	1334.3	1744.5	1714.4	1392.1	1653.1	1613.7	1270.2	1751	1571.3	1359.7	1516.63	1728.8	1579.97	1617	1512.33	1560.67	2.99656	3.35212	3.19056	2.96879	3.06285	3.2393	3	3
comp2263346_c1_seq31|m.57192	12	1687.3	1454	1404.8	1977.2	1720.4	1642.2	1705.8	1496.5	1463	1656.9	1464	1567.3	1656.8	1488.2	1495.6	1710.8	1445.7	1502	1515.37	1779.93	1555.1	1562.73	1546.87	1552.83	2.99406	3.45127	3.14035	2.86916	3.13279	3.22304	3	3
comp2268903_c0_seq4|m.66397	13	1208.2	1327.1	2001.3	1224.8	1506.4	2083.8	1076.6	1396.3	1902.6	1533.9	1411.9	2299.5	1328.6	1334.4	2088.7	1360.2	1334.5	2058.3	1512.2	1605	1458.5	1748.43	1583.9	1584.33	2.9878	3.11207	2.94527	3.2101	3.20779	3.28842	3	3
comp2261603_c1_seq1|m.54400	7	1756.5	1412.9	1363.2	1803.1	1238	1248.7	1532.8	1266	1134.7	1676.4	1612.8	1220.8	1340.6	1279.4	1010.4	1582.6	1341.5	1117.4	1510.87	1429.93	1311.17	1503.33	1210.13	1347.17	2.98517	2.77262	2.64775	2.7601	2.45082	2.79616	3	3
comp2262339_c0_seq1|m.55609	7	1545.9	1649.4	1331.5	1658.7	1788	1412.4	1698.4	1860.8	1467.7	1330.1	1591.4	1175.8	1093.3	1141.7	919.1	1148	1197.8	957.5	1508.93	1619.7	1675.63	1365.77	1051.37	1101.1	2.98135	3.14058	3.38375	2.50753	2.12928	2.28543	3	3
comp2273142_c0_seq1|m.74744	8	1532.7	1343.3	1632.8	1471.8	1307.3	1612.9	1375.3	1212.3	1508	1401.4	1395.9	1677.7	1336.8	1341.2	1543.9	1427.2	1247.4	1559.6	1502.93	1464	1365.2	1491.67	1407.3	1411.4	2.96949	2.83868	2.75687	2.73868	2.85013	2.92948	3	3
comp2237468_c0_seq1|m.27022	5	2180.6	1377.3	944.6	2677.7	1620.9	1223.7	2209.8	1423.4	939.3	2143.1	1425.8	895.7	1807.1	1181.7	721.6	2123.8	1355.1	916	1500.83	1840.77	1524.17	1488.2	1236.8	1464.97	2.96534	3.56922	3.07788	2.73231	2.50483	3.04066	3	3
comp2277904_c1_seq1|m.86843	10	1440.1	1322.5	1727.6	1134.4	1099.4	1296.9	1215.5	1206.4	1510.1	1450.4	1429.4	1760.1	1308.9	1284	1575.2	1308.6	1252.4	1567	1496.73	1176.9	1310.67	1546.63	1389.37	1376	2.95724	2.28199	2.64674	2.8396	2.81381	2.85601	3	3
comp2257235_c0_seq1|m.47704	12	1518.8	1420.3	1550.5	1714.5	1626.2	1748.3	1579	1428.4	1603.9	1547.8	1459.9	1701.9	1564.8	1486.8	1774.6	1560.5	1505.1	1625.6	1496.53	1696.33	1537.1	1569.87	1608.73	1563.73	2.95685	3.28917	3.104	2.88225	3.25808	3.24566	3	3
comp2259529_c0_seq1|m.51192	10	1308	1613.3	1556.5	1247.4	1532.9	1481.3	1155.2	1425.8	1386.3	1247.4	1474.3	1470.5	1152.2	1384.5	1354.9	1092.4	1319.6	1311.8	1492.6	1420.53	1322.43	1397.4	1297.2	1241.27	2.94907	2.7544	2.6705	2.56561	2.62715	2.57636	3	3
comp2243933_c0_seq1|m.32211	10	1415.6	1894.4	1166.3	1608.7	2218.2	1399.2	1449.6	1972	1236	1556.2	2185.1	1319.4	1511	2085.1	1351.8	1541.3	2106.8	1321.8	1492.1	1742.03	1552.53	1686.9	1649.3	1656.63	2.94809	3.37778	3.13516	3.09712	3.34024	3.43848	3	3
comp2278422_c0_seq1|m.89011	16	1247	2346.4	878.9	1281.3	2454.4	922.5	1161.3	2300.5	851.3	1230.5	2524.4	935	1025.8	1960.8	774.3	998.4	1959.6	747.9	1490.77	1552.73	1437.7	1563.3	1253.63	1235.3	2.94545	3.01073	2.90327	2.8702	2.53892	2.56397	3	3
comp2273581_c0_seq7|m.75639	9	1533.7	1944.5	982.9	1437.9	1733.2	880.2	1396	1868.5	930	1415.6	1853.7	938.2	1337	1730.3	880.2	1354.1	1750.2	859.8	1487.03	1350.43	1398.17	1402.5	1315.83	1321.37	2.93808	2.61847	2.82344	2.57497	2.66489	2.74261	3	3
comp2274096_c1_seq4|m.76855	14	1928.4	1405.9	1111.7	1930.3	1329.3	1121.4	1800.8	1238.5	1050.6	2167.9	1521.8	1248.5	1773.8	1178.9	967.2	1725.5	1131.1	978.3	1482	1460.33	1363.3	1646.07	1306.63	1278.3	2.92813	2.83157	2.75303	3.02215	2.64626	2.65322	3	3
comp1199432_c0_seq1|m.1095	10	1493.8	1525.7	1420.9	1662.4	1641.6	1461.2	1426.9	1441.3	1334.9	1434.7	1460.3	1319.1	1332.2	1284.8	1190.1	1444.1	1411.3	1244.1	1480.13	1588.4	1401.03	1404.7	1269.03	1366.5	2.92444	3.07989	2.82923	2.57901	2.57011	2.83629	3	3
comp2250533_c0_seq1|m.39039	19	1825.7	1184.4	1428.3	2077.3	1372.7	1670	1836	1243.6	1512.8	2051.1	1379.5	1557.3	1953.3	1398.5	1678.9	1962	1365.6	1614.2	1479.47	1706.67	1530.8	1662.63	1676.9	1647.27	2.92313	3.3092	3.09128	3.05257	3.39614	3.41904	3	3
comp2251346_c0_seq1|m.39994	14	1560.5	1555.9	1321.8	1939.5	1759.7	1485	1572.6	1508	1295.9	1680.4	1769.1	1465.2	1586.6	1658.1	1386.5	1674.8	1613.9	1450.5	1479.4	1728.07	1458.83	1638.23	1543.73	1579.73	2.92299	3.3507	2.94595	3.00777	3.12644	3.27887	3	3
Pdu_trscr_assembly_1|9334;|m.28552	19	1100.1	1386.7	1945.5	1042.1	1378.5	1836.6	1143.1	1512.5	2074.7	1313.8	1574.1	2240.6	1424.8	1718.4	2388.9	1250.3	1624.5	2137.4	1477.43	1419.07	1576.77	1709.5	1844.03	1670.73	2.91911	2.75155	3.1841	3.13862	3.73462	3.46775	3	3
comp2271168_c0_seq1|m.70546	11	1348	1529.3	1553.9	1295.3	1500.9	1463.6	1266.9	1463.9	1423.2	1267.3	1461.1	1461.1	1106.4	1241.9	1162.7	1111.4	1261	1221.8	1477.07	1419.93	1384.67	1396.5	1170.33	1198.07	2.91838	2.75323	2.79618	2.56395	2.37022	2.48669	3	3
comp2251594_c0_seq1|m.40214	8	1527.8	1451.9	1445.5	1760.8	1617.1	1567.6	1497.4	1481.7	1416.2	1395.4	1251	1345.7	1194.9	1152.9	1088.4	1349.6	1235.2	1172.7	1475.07	1648.5	1465.1	1330.7	1145.4	1252.5	2.91443	3.19642	2.9586	2.44315	2.31972	2.59967	3	3
comp2224448_c0_seq1|m.19874	8	1415.8	646.3	2342.4	1573.8	723.5	2377.2	1394.1	638	2216.3	1291.9	600.2	2262.9	1269.4	604.6	2182.1	1426.9	649.6	2211.4	1468.17	1558.17	1416.13	1385	1352.03	1429.3	2.9008	3.02126	2.85972	2.54284	2.7382	2.96663	3	3
comp2245603_c0_seq1|m.33759	8	1736.7	1238.4	1425.4	2002.9	1397.8	1719	1878.3	1351.4	1570.6	1806.4	1230.5	1439.6	1942.8	1357.3	1605.2	1845.5	1305.9	1485.9	1466.83	1706.57	1600.1	1492.17	1635.1	1545.77	2.89816	3.30901	3.23122	2.7396	3.31148	3.20837	3	3
comp2281676_c0_seq1|m.91255	9	1131.3	1568.8	1671	1249.1	1587.8	1663.9	1052.9	1396.1	1550.8	952	1261.9	1490.8	931.3	1202	1399.1	931.8	1228.2	1365.9	1457.03	1500.27	1333.27	1234.9	1177.47	1175.3	2.8788	2.909	2.69238	2.26726	2.38466	2.43944	3	3
comp2266680_c0_seq1|m.62479	9	1619.4	1345.8	1404.4	1807	1599.4	1590.6	1490.6	1235.1	1289.7	1579	1338.8	1395.1	1434	1209.9	1273.9	1599.7	1328.7	1421.7	1456.53	1665.67	1338.47	1437.63	1305.93	1450.03	2.87781	3.22971	2.70288	2.63947	2.64484	3.00967	3	3
comp2253875_c0_seq1|m.43271	13	1452.9	1773.3	1127.6	1647.5	1997.7	1310.3	1478.6	1793.4	1151.5	1727.7	2007.1	1313.7	1691	1986.8	1261.2	1571	1938	1218.9	1451.27	1651.83	1474.5	1682.83	1646.33	1575.97	2.86741	3.20288	2.97758	3.08966	3.33423	3.27105	3	3
comp2277869_c0_seq29|m.86707	18	1681.1	1306	1344.3	1682	1388.1	1433.6	1588.5	1271.5	1327.5	1711.5	1282.6	1358.4	1616.9	1221.9	1262.9	1560.8	1239	1298.9	1443.8	1501.23	1395.83	1450.83	1367.23	1366.23	2.85265	2.91087	2.81873	2.66371	2.76899	2.83573	3	3
comp2266882_c0_seq1|m.62832	13	1269.2	1463.7	1596.5	1786.8	1986.5	2117.1	1579	1743.7	1912.9	1303.3	1380.1	1513	1291.4	1380.4	1456.1	1342	1451.4	1529.5	1443.13	1963.47	1745.2	1398.8	1375.97	1440.97	2.85134	3.80714	3.52423	2.56818	2.78667	2.99085	3	3
comp2271350_c0_seq18|m.70897	6	1965.7	867.7	1494.3	2043.3	856.9	1553.1	1939.7	839.2	1463.2	1800.6	802.7	1397.5	1709.9	771.4	1292.4	1678.4	735.2	1274.7	1442.57	1484.43	1414.03	1333.6	1257.9	1229.43	2.85022	2.8783	2.85548	2.44847	2.54756	2.55179	3	3
comp2276272_c0_seq2|m.81963	19	1026.1	2368.3	920.1	992.3	2191.7	967.3	1121.2	2357.4	1007	1248.4	2722.2	1102.1	1282.5	2812.4	1185.6	1171.3	2584.4	1074.6	1438.17	1383.77	1495.2	1690.9	1760.17	1610.1	2.84152	2.6831	3.01939	3.10447	3.56477	3.3419	3	3
comp2272807_c0_seq4|m.74003	20	701.5	633.8	2977.1	720.1	709.2	3130.6	693.6	669.8	2959.9	939.2	649.6	3621.7	753.6	658.4	3250.8	736.2	636.6	3115.9	1437.47	1519.97	1441.1	1736.83	1554.27	1496.23	2.84014	2.94719	2.91014	3.1888	3.14778	3.10556	3	3
comp2263612_c1_seq1|m.57550	9	1388.4	1649.3	1260.3	1331.1	1526.3	1181.9	1221.8	1401.8	1243.7	1281.3	1415	1292.1	1025.5	1145	1181.8	1024.2	1211.1	1075.4	1432.67	1346.43	1289.1	1329.47	1117.43	1103.57	2.83066	2.61072	2.60319	2.44088	2.26308	2.29055	3	3
comp2277722_c0_seq17|m.86189	12	1334.8	1535.9	1426.7	1435.2	1655.1	1589.7	1325.1	1566.5	1468.3	1620.6	1910.3	1603.8	1496.1	1718.5	1562.5	1312.7	1617.9	1504.1	1432.47	1560	1453.3	1711.57	1592.37	1478.23	2.83026	3.02482	2.93477	3.14241	3.22494	3.0682	3	3
comp2222959_c0_seq1|m.19328	5	1244.9	981.4	2066.7	1396.5	1061.8	2109.4	862.7	794.4	1621.2	675.8	683.9	1355.2	571.5	545.1	1129.6	646.2	598.8	1209.3	1431	1522.57	1092.77	904.967	748.733	818.1	2.82736	2.95224	2.20672	1.66151	1.51637	1.69804	3	3
comp2261047_c0_seq1|m.53653	7	1330.2	2052.5	909.9	1592.2	2269	987.2	1340.8	1973.8	906	1191.2	1830.1	858.2	1389.8	2079	984.3	1140.3	1769.2	838.9	1430.87	1616.13	1406.87	1293.17	1484.37	1249.47	2.8271	3.13366	2.84101	2.37424	3.00621	2.59338	3	3
comp2254534_c0_seq1|m.44081	4	1358.5	1188.1	1741.8	1176.9	1018.3	1488.3	1053.8	942.9	1374.2	1044.3	966.1	1417.8	888.5	782	1224.9	963.7	881.8	1302.1	1429.47	1227.83	1123.63	1142.73	965.133	1049.2	2.82434	2.38075	2.26905	2.09804	1.95463	2.1777	3	3
comp2254566_c0_seq1|m.44122	12	1619.7	1130	1537.8	1846.1	1348.8	1706.4	1728.2	1169.3	1527.4	1973	1399.4	1860.5	2082.6	1353	1725.5	1929.7	1340.4	1706.4	1429.17	1633.77	1474.97	1744.3	1720.37	1658.83	2.82374	3.16785	2.97853	3.20251	3.48417	3.44305	3	3
comp2242933_c0_seq1|m.31351	9	1557.4	1202.2	1507.1	1483.3	1161.5	1405.1	1180.5	901	1139.9	1298.8	965.1	1207.3	1153	878.1	1127	1288.5	1020.4	1220.7	1422.23	1349.97	1073.8	1157.07	1052.7	1176.53	2.81004	2.61757	2.16842	2.12436	2.13198	2.442	3	3
comp2275853_c0_seq1|m.80817	15	1250.1	1292.4	1720.9	1109.1	1079.1	1587.4	1039.6	1028.9	1532.3	1291.3	1292.3	1887.5	1351.1	1317.5	1934.4	1230.5	1247.9	1766.9	1421.13	1258.53	1200.27	1490.37	1534.33	1415.1	2.80787	2.44028	2.4238	2.73629	3.10741	2.93716	3	3
comp2258609_c0_seq1|m.49647	11	1709	1139.5	1414	1806.6	1248.1	1423.4	1705.8	1109.9	1347.3	1853.7	1173.7	1488.2	1886.1	1191.3	1550.2	1727.4	1167.5	1392.7	1420.83	1492.7	1387.67	1505.2	1542.53	1429.2	2.80728	2.89433	2.80223	2.76353	3.12401	2.96643	3	3
comp2277203_c0_seq4|m.84565	11	1745.4	1297.7	1207.3	1782.9	1281.1	1257.1	1656.4	1217.1	1112.8	1834.9	1221.3	1154.6	1711.4	1258.5	1081.6	1740.6	1251.1	1149.2	1416.8	1440.37	1328.77	1403.6	1350.5	1380.3	2.79931	2.79285	2.68329	2.57699	2.7351	2.86493	3	3
comp1965369_c0_seq1_contamination|m.3664	3	1638.5	1127.3	1482.7	2201.9	1516.2	1726.2	1472.5	1047.3	1288.1	1044	829.1	1119.5	1003.4	754.8	1057.2	1201.4	856.3	1086.6	1416.17	1814.77	1269.3	997.533	938.467	1048.1	2.79806	3.51881	2.56321	1.83146	1.90063	2.17542	3	3
comp2254548_c0_seq3|m.44097	10	1911.4	1581.1	755.4	1802.1	1463.2	738.7	1591.9	1328.8	702.7	1535	1277.2	672.4	1464.7	1255.2	637	1413.2	1227.3	628.4	1415.97	1334.67	1207.8	1161.53	1118.97	1089.63	2.79766	2.5879	2.43901	2.13256	2.26619	2.26163	3	3
comp2201786_c0_seq1|m.13247	12	1480.1	1532.5	1233.7	1742.6	1810.2	1328.4	1564.3	1657.4	1290.9	1771	1746.2	1611.9	1719.2	1799.6	1499.4	1635.2	1717	1301.9	1415.43	1627.07	1504.2	1709.7	1672.73	1551.37	2.79661	3.15486	3.03756	3.13898	3.3877	3.21999	3	3
comp2260103_c0_seq1|m.51994	13	1556.2	1711.5	967.3	1677.2	1902.4	1063.7	1459.9	1577.9	895.9	1426.4	1579.3	893.2	1330.8	1445.6	787.1	1465.7	1595.6	878.4	1411.67	1547.77	1311.23	1299.63	1187.83	1313.23	2.78917	3.0011	2.64789	2.38611	2.40566	2.72573	3	3
comp2267408_c0_seq1|m.63775	14	1005.9	1421.2	1798.2	1006.1	1396.8	1892.8	958.2	1314	1795.1	988.1	1401.1	1857.9	1051.7	1294.4	1811.3	1003.9	1287.2	1727.9	1408.43	1431.9	1355.77	1415.7	1385.8	1339.67	2.78278	2.77643	2.73782	2.5992	2.80659	2.78059	3	3
comp2267765_c0_seq1|m.64405	12	1358.1	1093	1772.3	1331.4	1054.5	1775.4	1154.4	912.5	1446.6	795.1	721	978.2	927	709.9	1133.2	1001.8	762.6	1244	1407.8	1387.1	1171.17	831.433	923.367	1002.8	2.78153	2.68957	2.36504	1.5265	1.87005	2.0814	3	3
comp2198016_c0_seq1|m.12499	20	1035.7	1365.8	1813.7	1398	1503.2	2154.7	1207.3	1519.5	1979.3	1219.6	2180.2	2255.3	1285.2	2022.4	2325.9	1261.7	1582.8	2097	1405.07	1685.3	1568.7	1885.03	1877.83	1647.17	2.77613	3.26777	3.16781	3.46089	3.80308	3.41884	3	3
comp2202068_c0_seq1|m.13304	9	1451.4	1629.3	1124.2	1390.9	1492.7	1055.6	1326.2	1430.9	989.1	1771.8	1986.5	1249	1408.5	1612.8	1100.2	1427.1	1574.6	1050.7	1401.63	1313.07	1248.73	1669.1	1373.83	1350.8	2.76934	2.54602	2.52167	3.06444	2.78235	2.8037	3	3
comp2263508_c0_seq1|m.57408	11	1383.7	1490.7	1327.3	1438.3	1556.8	1462.9	1381.5	1455.4	1351.6	1722.5	1886	1664	2047.1	2043	1970.4	1753.8	1793.1	1685.2	1400.57	1486	1396.17	1757.5	2020.17	1744.03	2.76723	2.88133	2.8194	3.22674	4.09134	3.61989	3	3
comp2269009_c0_seq1|m.66627	6	1568	1248.9	1382.5	1583.3	1207.2	1396.5	1374.1	1074.8	1253.4	1265	961.7	1179.1	1056.6	869.2	1008.3	1093.7	836.9	1016.3	1399.8	1395.67	1234.1	1135.27	978.033	982.3	2.76572	2.70618	2.49212	2.08433	1.98076	2.03885	3	3
comp2235576_c0_seq2|m.25749	8	1377	1304	1515.8	1500.3	1389.6	1545.5	1270.6	1200.8	1447	1191.1	1107.8	1393.2	1061.4	1012.2	1319.4	1201	1136.2	1403.5	1398.93	1478.47	1306.13	1230.7	1131	1246.9	2.76401	2.86673	2.63759	2.25955	2.29056	2.58805	3	3
Pdu_trscr_assembly_1|7327;|m.81715	9	1598.2	1430.7	1166.8	1619.1	1466.4	1189	1379.3	1252.7	1026.5	1301.6	1093	1013.3	1212.1	1090.2	927.9	1340.7	1215.9	973.2	1398.57	1424.83	1219.5	1135.97	1076.73	1176.6	2.76328	2.76273	2.46264	2.08562	2.18065	2.44213	3	3
comp2275295_c1_seq2|m.79482	10	1296.8	1828	1069.8	1262.6	1984	1132.1	1168.6	1797.2	1020.1	1261.8	1979.8	1013	1128.6	1838.8	995.8	1089.3	1974.2	1000.3	1398.2	1459.57	1328.63	1418.2	1321.07	1354.6	2.76256	2.83008	2.68302	2.60379	2.67549	2.81159	3	3
comp2265690_c0_seq3|m.60829	15	780.2	1531.2	1860	1003.7	2042.3	2311.2	893.8	1758.9	2073.2	936.4	1846.8	2124.5	872.9	1790.4	2066.4	891.7	1803.4	2126.1	1390.47	1785.73	1575.3	1635.9	1576.57	1607.07	2.74728	3.46251	3.18114	3.00349	3.19294	3.3356	3	3
comp2266926_c0_seq2|m.62890	8	1392.7	1301.5	1451.6	1272.2	1250.8	1374.1	1254.3	1234.3	1357.8	1237.2	1181.8	2015.9	1339.5	1303.6	1463.9	1198.8	1207.2	1361.8	1381.93	1299.03	1282.13	1478.3	1369	1255.93	2.73042	2.51881	2.58912	2.71414	2.77256	2.6068	3	3
comp2277505_c0_seq1|m.85479	11	1096.2	1199	1849.9	1091.4	1233.5	1910.1	1104.3	1240.1	1890.6	1334.8	1486.4	2635.4	1174.6	1274.8	1973.1	1116.6	1220.6	1906.7	1381.7	1411.67	1411.67	1818.87	1474.17	1414.63	2.72996	2.7372	2.8507	3.33941	2.98555	2.93619	3	3
comp2272863_c1_seq5|m.74143	8	1490.9	921.6	1732.5	1693.9	1062.8	2169.9	1445	954.3	1681.6	1571	958.7	1726	1370.6	842.6	1490.1	1395.4	867.7	1629.4	1381.67	1642.2	1360.3	1418.57	1234.43	1297.5	2.72989	3.1842	2.74697	2.60447	2.50003	2.69307	3	3
comp2253561_c0_seq1|m.42779	7	1347.1	1597.3	1194.8	1410.7	1752.2	1305.3	1374.7	1672.4	1183.3	1415.6	1634.2	1198	1328.2	1540.3	1179.7	1230.3	1486.9	1039.1	1379.73	1489.4	1410.13	1415.93	1349.4	1252.1	2.72607	2.88793	2.8476	2.59963	2.73287	2.59884	3	3
comp2224040_c0_seq1|m.19713	7	1033.1	1880.1	1219.4	1227.3	2090.2	1509.9	1035.8	1777	1238	1242.5	2040.4	1528.1	1039.7	1817.9	1239	1107.4	1852.8	1352.8	1377.53	1609.13	1350.27	1603.67	1365.53	1437.67	2.72173	3.12009	2.72671	2.94431	2.76554	2.984	3	3
Pdu_trscr_assembly_1|17807;|m.62055	10	1530.9	1623.5	971.9	1474.5	1479.7	889.4	1393.2	1390.7	862.8	1535.2	1601.9	1046.2	1450	1492.6	959.4	1357.5	1410.4	887.8	1375.43	1281.2	1215.57	1394.43	1300.67	1218.57	2.71758	2.48423	2.4547	2.56016	2.63417	2.52924	3	3
comp2262362_c0_seq1|m.55645	16	1449.4	1283.2	1385.4	1425.9	1252.3	1404.8	1423.3	1274.3	1345.8	1722	1589.4	1718.7	1722.1	1524.5	1733.9	1680.8	1508.5	1635.6	1372.67	1361	1347.8	1676.7	1660.17	1608.3	2.71211	2.63896	2.72173	3.0784	3.36225	3.33816	3	3
comp2277475_c0_seq2|m.85365	8	960.1	1711.9	1440.7	838.4	1475.5	1259.4	814.8	1509.2	1251.6	838.9	1586.2	1340.5	804.1	1514.2	1237.5	839.4	1547.5	1281.9	1370.9	1191.1	1191.87	1255.2	1185.27	1222.93	2.70862	2.30953	2.40684	2.30453	2.40046	2.5383	3	3
comp2254418_c0_seq1|m.43945	4	1369.5	1256.8	1483	1160.3	1095.9	1348	1182.7	1121	1324.2	1140.5	1168.5	1276.5	993.2	926	1123.3	1041.7	938.8	1280.3	1369.77	1201.4	1209.3	1195.17	1014.17	1086.93	2.70638	2.3295	2.44204	2.19431	2.05394	2.25602	3	3
comp2237757_c0_seq1|m.27251	11	1870.1	1251.8	970.7	1702.7	1157.5	884.8	1582.5	1080.5	859.6	1659.8	1054.6	929	1791.7	1289.4	1084.8	1868.5	1228.3	956.5	1364.2	1248.33	1174.2	1214.47	1388.63	1351.1	2.69538	2.4205	2.37116	2.22974	2.81233	2.80432	3	3
comp2277947_c0_seq1|m.86990	12	1226.8	1227.6	1616.7	1264.5	1252.1	1744.7	1165	1121.2	1493.2	1158.6	1213.5	1560.4	1109.5	1022.7	1308.7	1219.4	1187.3	1553.2	1357.03	1420.43	1259.8	1310.83	1146.97	1319.97	2.68122	2.7542	2.54402	2.40667	2.32289	2.7397	3	3
comp2270650_c0_seq1|m.69588	10	2057.6	574.7	1429.3	2292.6	646.9	1239.8	2058.7	614.5	1175	2094.9	639	1298.3	2072.4	611.8	1232.7	2100.7	579.1	1198.6	1353.87	1393.1	1282.73	1344.07	1305.63	1292.8	2.67497	2.7012	2.59033	2.46769	2.64423	2.68332	3	3
comp2270148_c0_seq3|m.68661	10	978.2	1223.1	1854.6	1229.1	1441.4	2156.2	960.5	1211.3	1783.5	1008.9	1265.3	1859.7	958.6	1218.1	1832.7	952.6	1205.2	1808.4	1351.97	1608.9	1318.43	1377.97	1336.47	1322.07	2.67121	3.11964	2.66243	2.52993	2.70668	2.74406	3	3
comp2208016_c0_seq1|m.14262	7	1370.6	1559.2	1115	1423.9	1588.6	1165.7	1281.5	1423.5	1113.2	1515.6	1555.6	1265.2	1430.9	1568.4	1179.7	1345.9	1408.3	1128.1	1348.27	1392.73	1272.73	1445.47	1393	1294.1	2.6639	2.70049	2.57014	2.65386	2.82117	2.68602	3	3
comp2269987_c0_seq2|m.68354	8	1033.4	1516.4	1493.7	1046.7	1469.2	1440.6	1193.3	1636.3	1607.8	1371.2	1942.6	1894.9	1235.5	1682.1	1622.2	1016.4	1447.9	1401.4	1347.83	1318.83	1479.13	1736.23	1513.27	1288.57	2.66304	2.5572	2.98694	3.1877	3.06474	2.67453	3	3
comp2272087_c2_seq11|m.72459	7	1424	1250.9	1366.1	1379.4	1261.4	1333.3	1345.5	1242.5	1314.6	1601.9	1570.1	1597	1499.3	1380.1	1400.5	1438.5	1275.9	1336.2	1347	1324.7	1300.87	1589.67	1426.63	1350.2	2.6614	2.56858	2.62695	2.9186	2.88929	2.80246	3	3
comp2140166_c0_seq1|m.7086	16	1273.2	997.7	1750.3	1632.2	1250.8	2160.7	1392.6	1072	1932.8	1349	1000.3	1733.5	1366	1016.7	1851.2	1349.5	993.5	1818.3	1340.4	1681.23	1465.8	1360.93	1411.3	1387.1	2.64836	3.25989	2.96002	2.49865	2.85823	2.87905	3	3
comp2274238_c3_seq9|m.77182	7	973.5	892.9	2140	1165.1	1048.5	2425	1013	937.4	2144.7	1095.5	1009.1	2264.4	1002.7	898.9	2282.9	1024.7	904.2	2227.3	1335.47	1546.2	1365.03	1456.33	1394.83	1385.4	2.63861	2.99806	2.75653	2.67381	2.82488	2.87552	3	3
comp2274242_c0_seq2|m.77187	15	834.1	915.7	2256.1	911.9	1011.6	2380.7	809.8	918.5	2197.6	769.3	887.5	2223.3	746	801.3	2054.2	796.7	874.9	2114.9	1335.3	1434.73	1308.63	1293.37	1200.5	1262.17	2.63828	2.78193	2.64264	2.3746	2.43131	2.61974	3	3
comp2273182_c0_seq1|m.74815	12	1324.6	1690.5	986.4	1380.9	1705.5	1038.9	1291.3	1708.3	977.1	1471.9	1811.3	1061.5	1299.1	1772.7	949.6	1238.7	1594.1	921.9	1333.83	1375.1	1325.57	1448.23	1340.47	1251.57	2.63538	2.6663	2.67683	2.65894	2.71478	2.59773	3	3
comp2278062_c0_seq4|m.87412	16	1605.9	1177.5	1215.2	1742.3	1344.6	1361.4	1719.2	1366.2	1376.9	1697.4	1263.3	1351.7	1673.1	1313	1321.9	1581	1220.9	1154.2	1332.87	1482.77	1487.43	1437.47	1436	1318.7	2.63347	2.87506	3.0037	2.63917	2.90826	2.73708	3	3
comp2275833_c0_seq1|m.80771	12	987.9	1923.3	1083.6	1111.8	2249.8	1265.5	960.8	1861.9	1033.8	842.6	1852	1060.6	704.7	1544.8	962.8	746	1602.2	1033.5	1331.6	1542.37	1285.5	1251.73	1070.77	1127.23	2.63097	2.99063	2.59592	2.29816	2.16857	2.33967	3	3
comp2280694_c0_seq1|m.91236	5	936.9	1235.6	1808.2	926.2	1322.7	1947.1	914.2	1258.7	1813.4	539.7	913.3	1239	569.7	892.3	1237	604.9	951.7	1355.1	1326.9	1398.67	1328.77	897.333	899.667	970.567	2.62168	2.712	2.68329	1.64749	1.82205	2.01449	3	3
comp2245511_c0_seq1|m.33658	11	1259.1	1792.9	925.9	1424.8	2041	1140	1256.8	1860.1	982.2	1449.9	2083.9	1062.4	1310.2	1917.5	1003.6	1354.3	1966.2	1019.2	1325.97	1535.27	1366.37	1532.07	1410.43	1446.57	2.61984	2.97686	2.75922	2.81285	2.85648	3.00247	3	3
comp2273140_c0_seq2|m.74734	11	1413.4	905.1	1658.8	1551.4	956.2	1711	1443.2	909.2	1661.2	1562.8	1007	1793.5	1410.1	918	1685.6	1363.9	887	1646.2	1325.77	1406.2	1337.87	1454.43	1337.9	1299.03	2.61945	2.7266	2.70167	2.67032	2.70958	2.69626	3	3
comp2263950_c0_seq2|m.58147	12	1170.3	1172.5	1633.3	1257.5	1248.6	1677.8	1129.7	1160.1	1509.1	858.9	865.5	1119.6	779	874.7	1062.2	884	911.5	1194.6	1325.37	1394.63	1266.3	948	905.3	996.7	2.61865	2.70418	2.55715	1.74051	1.83346	2.06874	3	3
comp2272299_c0_seq11|m.72914	10	1079.6	1573.7	1318.6	927.9	1354.5	1082.8	903	1283.6	1060.9	1085.8	1526.6	1174.2	914.5	1220.3	1060.1	924.8	1277.4	1047.8	1323.97	1121.73	1082.5	1262.2	1064.97	1083.33	2.61589	2.17503	2.18599	2.31738	2.15682	2.24855	3	3
comp2268964_c0_seq1|m.66515	8	1287.1	1111.1	1572.7	1288.6	1070.3	1559.8	1275.7	1087.4	1556.4	1231.3	1154.1	1570.3	1828.5	1515.8	2211.9	1729.6	1412.3	2131.6	1323.63	1306.23	1306.5	1318.57	1852.07	1757.83	2.61523	2.53277	2.63833	2.42087	3.75089	3.64853	3	3
comp2262357_c0_seq1|m.55634	8	1674.5	1828.3	459.4	1787	2008	553.3	1743.6	1941.1	540	1534.6	1768.7	476.2	1568.9	1710.8	506	1522.1	1732.5	492.1	1320.73	1449.43	1408.23	1259.83	1261.9	1248.9	2.6095	2.81043	2.84377	2.31304	2.55566	2.5922	3	3
comp2272882_c0_seq14|m.74184	9	1427.6	1168.9	1351.4	1248.6	1057.8	1218.4	1171.5	1013.7	1167.5	1343	1171.2	1382.7	1114.8	983.1	1173.4	1160.4	963.9	1149.5	1315.97	1174.93	1117.57	1298.97	1090.43	1091.27	2.60008	2.27818	2.2568	2.38488	2.2084	2.26502	3	3
comp1955265_c0_seq1|m.3514	7	968.7	1509.8	1459.6	845.5	1263.9	1245.6	564.8	1053.2	959.1	772.9	1436.3	1288.8	715.3	1260.9	1179.8	930	1404.9	1385.5	1312.7	1118.33	859.033	1166	1052	1240.13	2.59363	2.16843	1.73472	2.14076	2.13056	2.574	3	3
comp2269532_c0_seq13|m.67583	9	1342.8	1024.8	1564.6	1223.5	1025.5	1511.7	1232.6	1019.8	1513.2	1305.8	1001.6	1560.5	1398	1125.5	1683.2	1304.5	1040.7	1528	1310.73	1253.57	1255.2	1289.3	1402.23	1291.07	2.58974	2.43065	2.53473	2.36714	2.83987	2.67972	3	3
comp2275841_c0_seq1|m.80783	9	1428.8	1434.4	1061	1521.8	1456.6	1061.8	1396.5	1360.6	1071	1397.2	1391.1	1026	1420.6	1397.9	1089.7	1424.5	1370.3	1066.6	1308.07	1346.73	1276.03	1271.43	1302.73	1287.13	2.58447	2.6113	2.5768	2.33433	2.63836	2.67156	3	3
comp2275905_c0_seq4|m.80965	9	1604.7	1115.4	1200.5	1664.2	1344.2	1452.7	1681.5	1339.2	1467.7	1749.6	1239.1	1426.5	1529.7	1125.3	1351.2	1424.7	1126.4	1200	1306.87	1487.03	1496.13	1471.73	1335.4	1250.37	2.5821	2.88334	3.02127	2.70208	2.70452	2.59524	3	3
comp2275457_c1_seq8|m.79890	18	1406.8	1748.4	755.9	1423.7	1872	795.6	1503.3	1896.9	788.8	1657.6	1986.9	845.5	1600.6	1935.3	854.3	1369.9	1750.5	766.5	1303.7	1363.77	1396.33	1496.67	1463.4	1295.63	2.57585	2.64433	2.81974	2.74786	2.96375	2.6892	3	3
comp2276491_c0_seq8|m.82522	17	1131.5	1341.1	1433.9	1061.6	1413.8	1311.9	1010.2	1273.9	1260.1	1004.8	1269.9	1600.6	1012.1	1283	1278	1057.4	1310.9	1193.9	1302.17	1262.43	1181.4	1291.77	1191.03	1187.4	2.57282	2.44784	2.3857	2.37166	2.41214	2.46455	3	3
comp2278161_c0_seq3|m.87805	14	1610.9	982.8	1309	1549	946	1173.2	1455	888.5	1135.5	1901.6	1176.8	1553.2	1993.8	1298.3	1631.7	1856.4	1234.5	1569.4	1300.9	1222.73	1159.67	1543.87	1641.27	1553.43	2.57031	2.37086	2.34181	2.83452	3.32397	3.22428	3	3
comp2267707_c0_seq2|m.64292	9	1751.8	491.8	1653.5	1767.7	483.3	1680.9	1642.7	437.8	1536.2	1783.9	556	1646.1	1640.2	460.6	1513.4	1566.8	497.7	1557.4	1299.03	1310.63	1205.57	1328.67	1204.73	1207.3	2.56663	2.5413	2.4345	2.43941	2.43988	2.50585	3	3
comp2241299_c0_seq1|m.29837	9	1338.4	1508.3	1038.1	1672.3	1834.2	1322.5	1445.3	1563.6	1155.2	1508.5	1653.7	1233	1484	1572.5	1181.4	1479	1561.4	1205.2	1294.93	1609.67	1388.03	1465.07	1412.63	1415.2	2.55852	3.12112	2.80298	2.68984	2.86093	2.93737	3	3
comp2141429_c0_seq1|m.7305	11	1446.9	1058.5	1369.6	1612.3	1226.6	1502.2	1512.6	1106.9	1359.9	1609.5	1152.4	1442.1	1529	1140.4	1335.5	1510.1	1129	1367.6	1291.67	1447.03	1326.47	1401.33	1334.97	1335.57	2.55207	2.80578	2.67865	2.57283	2.70364	2.77208	3	3
comp2259638_c0_seq1|m.51327	13	1408.9	1694.2	771	1420.7	1725.9	746.6	1385	1696.5	750.4	1618.1	1903	913.6	1366.4	1683.8	743.3	1305	1665.7	702.9	1291.37	1297.73	1277.3	1478.23	1264.5	1224.53	2.55148	2.51629	2.57936	2.71401	2.56093	2.54162	3	3
comp1926910_c0_seq1|m.3122	9	892.1	1649.7	1321.6	850.6	1651.4	1242.6	752.7	1513.2	1095.7	838	1611.9	1148.8	716	1425.4	1052.5	691.4	1442.6	1046.2	1287.8	1248.2	1120.53	1199.57	1064.63	1060.07	2.54443	2.42024	2.26279	2.20239	2.15615	2.20026	3	3
comp2217087_c0_seq1|m.16899	14	1578.1	1636.6	624.1	1603.5	1613.6	597.9	1539.3	1519.7	571.5	1740.5	1844.9	762.5	1726.9	1731.2	616.1	1606.5	1644.1	592.5	1279.6	1271.67	1210.17	1449.3	1358.07	1281.03	2.52823	2.46574	2.44379	2.66089	2.75042	2.65889	3	3
comp2272791_c0_seq1|m.73970	8	1434.7	1298.6	1105.4	1571.7	1377.6	1230.3	1462.1	1298.9	1160.7	1585.6	1517.5	1216.3	1454.6	1273.3	1179.8	1475.6	1301.2	1183.2	1279.57	1393.2	1307.23	1439.8	1302.57	1320	2.52816	2.7014	2.63981	2.64345	2.63802	2.73977	3	3
comp2258554_c0_seq1|m.49568	13	1366.7	1005.7	1464.1	1141.4	918.7	1211.8	1140.7	887.6	1216.8	1399.6	1005.6	1432.9	1167.7	885.1	1216.8	1173.9	864.7	1262.8	1278.83	1090.63	1081.7	1279.37	1089.87	1100.47	2.52671	2.11472	2.18437	2.3489	2.20725	2.28411	3	3
comp2257585_c0_seq1|m.48216	5	1467.2	936.5	1425.3	1718.9	1082.1	1629.7	1775.4	1142.4	1749.4	2006.3	1211.7	2084.4	1999.6	1343.4	1928.9	1837.3	1200.9	1814.9	1276.33	1476.9	1555.73	1767.47	1757.3	1617.7	2.52177	2.86369	3.14163	3.24504	3.55897	3.35768	3	3
comp2265735_c0_seq4|m.60895	14	1365.6	1540	910.9	1478.6	1696.5	984.5	1365.7	1580.3	899	1217.3	1557	843.2	1212.3	1440.6	805.3	1257.9	1473.8	807.1	1272.17	1386.53	1281.67	1205.83	1152.73	1179.6	2.51354	2.68847	2.58818	2.21389	2.33457	2.44836	3	3
comp2260542_c0_seq1|m.52639	5	1152.8	960.8	1701.6	1118.3	927.1	1605.4	1125.5	961.8	1634.1	1177.4	938	1761.4	1133.1	934.6	1621.3	1090.4	915.1	1566.7	1271.73	1216.93	1240.47	1292.27	1229.67	1190.73	2.51269	2.35962	2.50498	2.37258	2.49038	2.47147	3	3
comp2250201_c0_seq1|m.38525	12	1552.2	1298.8	949.5	1424.7	1219.3	903.7	1407	1199	872.6	1639.3	1430.4	1112.1	1598.9	1289.8	882.2	1338.1	1142.8	810.1	1266.83	1182.57	1159.53	1393.93	1256.97	1097	2.503	2.29298	2.34155	2.55924	2.54567	2.27692	3	3
comp2270926_c0_seq1|m.70120	17		1524.1	1006.1		1545.7	1113.8		1461.6	1002.7		1632.7	1027.8		1541.8	1036.3		1400.9	946.1	1265.1	1329.75	1232.15	1330.25	1289.05	1173.5	2.49958	2.57837	2.48819	2.44232	2.61065	2.4357	3	2
comp2274581_c1_seq21|m.92631	5	677.6	1390.5	1719.8	627.9	1215.4	1514.6	579.6	1211.2	1511.3	402.5	722.4	964.1	359.4	734.7	838.1	401.1	842.9	987.3	1262.63	1119.3	1100.7	696.333	644.067	743.767	2.49471	2.17031	2.22274	1.27846	1.30439	1.54375	3	3
comp2261378_c0_seq7|m.54131	5	1083.9	1433.6	1265.7	1034.2	1652	1386.2	893.3	1471.4	990.5	993.8	1410.1	1139.5	981.1	1388.9	1100.3	1024.5	1536.2	1341.7	1261.07	1357.47	1118.4	1181.13	1156.77	1300.8	2.49161	2.63211	2.25848	2.16854	2.34274	2.69992	3	3
comp1201878_c0_seq1|m.1138	7	984.6	1498.4	1298.5	941.1	1476.8	1235.9	834.9	1364.9	1118.4	833.3	1450.9	1179.4	685.3	1255.9	923.7	723.9	1209.2	958.3	1260.5	1217.93	1106.07	1154.53	954.967	963.8	2.49049	2.36156	2.23358	2.11971	1.93404	2.00045	3	3
comp2276498_c0_seq1|m.82544	7	506	1664.4	1597.8	497.5	1617.4	1550	478.3	1536.5	1446	505.3	1610.3	1695.6	473.4	1351.5	1420.9	481.7	1447.5	1413.3	1256.07	1221.63	1153.6	1270.4	1081.93	1114.17	2.48173	2.36873	2.32956	2.33244	2.19118	2.31255	3	3
comp2273120_c0_seq1|m.74680	9	988.3	1092.5	1677.2	1000	1031	1603.1	989.3	1060.4	1702.7	1056.7	1128.7	1805	965.4	977.3	1628.3	855.9	930.3	1557.6	1252.67	1211.37	1250.8	1330.13	1190.33	1114.6	2.47501	2.34882	2.52585	2.44211	2.41072	2.31345	3	3
comp2263073_c0_seq1|m.56786	9	1113.8	1270	1366.9	1071	1213.4	1334.7	1052.2	1214.5	1273.4	1129.6	1320.6	1398	1050.7	1197.3	1313	1077.4	1182.5	1338.8	1250.23	1206.37	1180.03	1282.73	1187	1199.57	2.47021	2.33913	2.38294	2.35508	2.40397	2.4898	3	3
comp2139434_c0_seq1|m.6943	10	1370.8	1179	1196	1710	1379.7	1483.5	1379.5	1159.9	1186.1	1246.7	1015.7	1017.7	1389	1205.8	1197.9	1473.8	1236.9	1285.1	1248.6	1524.4	1241.83	1093.37	1264.23	1331.93	2.46698	2.95579	2.50774	2.00741	2.56039	2.76454	3	3
comp2239022_c0_seq1|m.28102	5	1255	1537.1	951.3	1356.3	1637.6	1025.3	1042.3	1288.6	801.9	644.2	762.2	626.3	657.5	741.4	608.6	746.3	830.9	699	1247.8	1339.73	1044.27	677.567	669.167	758.733	2.4654	2.59772	2.10878	1.244	1.35523	1.57482	3	3
comp2278390_c0_seq1|m.88826	13	1327.1	1192	1224.2	1250.3	1126.7	1093.9	1289.6	1121.8	1140.5	1548	1658.6	1340.9	1331.1	1189.6	1196.9	1269.1	1170.2	1107	1247.77	1156.97	1183.97	1515.83	1239.2	1182.1	2.46533	2.24334	2.39089	2.78305	2.50969	2.45355	3	3
comp2258349_c0_seq1|m.49322	10	1323	1406.3	1010.4	1310.6	1511.4	1051.5	1281.6	1418.5	1040.9	1544.7	1702.7	1283.8	1311.7	1550.8	1164.5	1331.1	1493.7	1068.1	1246.57	1291.17	1247	1510.4	1342.33	1297.63	2.46296	2.50355	2.51817	2.77307	2.71856	2.69335	3	3
comp2277088_c0_seq32|m.84183	9	1038	1502.9	1197.3	978.2	1493.1	1125.6	889.3	1418	1034.5	887.7	1300.5	1027.4	889.9	1447.6	1072.1	946	1534.9	1114.2	1246.07	1198.97	1113.93	1071.87	1136.53	1198.37	2.46197	2.32478	2.24946	1.96793	2.30176	2.48731	3	3
comp2269110_c0_seq3|m.66810	8	1103.3	1208	1421.9	1138.8	1251.3	1414.6	1058.4	1144	1340	1066.3	1201.6	1444.1	991.4	1098.5	1306.7	988	1041.3	1291.9	1244.4	1268.23	1180.8	1237.33	1132.2	1107.07	2.45868	2.45909	2.38449	2.27173	2.29299	2.29781	3	3
comp2272087_c1_seq4|m.72458	5	1315.8	1067.9	1337.3	1380.4	1172.5	1374.5	1254.7	1068.6	1284.6	1411.8	1155	1473.1	1239.5	1009.1	1266	1341.1	1135.5	1387.7	1240.33	1309.13	1202.63	1346.63	1171.53	1288.1	2.45065	2.53839	2.42858	2.4724	2.37265	2.67356	3	3
comp2270905_c1_seq5|m.70069	7	1461.6	1275.4	979.9	1182	981.3	765.9	1142.8	935.5	671.8	1442.6	1243.1	871.7	1221.1	997.4	685.1	1457.2	1250.9	918.2	1238.97	976.4	916.7	1185.8	967.867	1208.77	2.44795	1.89323	1.85117	2.17711	1.96017	2.5089	3	3
comp2268635_c0_seq2|m.65950	13	1077.8	1044.1	1592.3	1041.3	1069.8	1461.9	1039.5	1005.6	1432.8	1248.2	1131.6	1757.5	1207.2	1142.8	1714.8	1139.8	1154.6	1576.1	1238.07	1191	1159.3	1379.1	1354.93	1290.17	2.44617	2.30933	2.34107	2.53201	2.74408	2.67785	3	3
comp2278234_c1_seq4|m.88159	12	1426.6	1345.8	935.1	1479.6	1403.7	922.1	1393	1281	890.8	1723.4	1630.2	1173.7	1333.2	1253.3	887.7	1355.3	1249.2	860.1	1235.83	1268.47	1188.27	1509.1	1158.07	1154.87	2.44176	2.45954	2.39957	2.77069	2.34537	2.39702	3	3
comp2271425_c0_seq4|m.71034	9	1131.1	1398.8	1172.7	1178.8	1448.6	1198.9	1052.3	1350.2	1135.7	1071.3	1346.6	1185.2	1001.8	1351	1147.3	1096.6	1379.3	1191.7	1234.2	1275.43	1179.4	1201.03	1166.7	1222.53	2.43853	2.47305	2.38166	2.20508	2.36286	2.53747	3	3
comp2240869_c0_seq1|m.29469	12	1221.8	1165	1300.1	1318.3	1269.3	1397.9	1149.1	1118.7	1262.8	1005.7	1139.3	1231.1	1037.5	1078.3	1173	1147.3	1096.2	1226.6	1228.97	1328.5	1176.87	1125.37	1096.27	1156.7	2.42819	2.57594	2.37655	2.06616	2.22021	2.40083	3	3
comp2276302_c0_seq1|m.82036	10	1686.2	808	1188.5	1653.8	831.8	1215.6	1645.8	793	1140.8	1736.1	633.8	918.4	1697.7	772.1	1061.6	1588.5	769.6	1061.1	1227.57	1233.73	1193.2	1096.1	1177.13	1139.73	2.42542	2.39219	2.40953	2.01242	2.38399	2.36561	3	3
comp2260451_c0_seq1|m.52482	12	1082.1	1025.6	1558.8	1102	977.1	1504.3	1097.1	1038.7	1602.2	1139.8	1051.7	1822.7	1046.5	1105.3	1654	1058.1	1017	1509.2	1222.17	1194.47	1246	1338.07	1268.6	1194.77	2.41475	2.31605	2.51616	2.45667	2.56923	2.47984	3	3
comp2254675_c0_seq1|m.44244	14	1210.2	1132.7	1306.6	1357.6	1086.4	1372.1	1203.9	1135.2	1344.5	1080.1	1297.6	1296.6	940.3	936	1061	1059.1	964.4	1127.2	1216.5	1272.03	1227.87	1224.77	979.1	1050.23	2.40356	2.46646	2.47954	2.24865	1.98292	2.17985	3	3
comp2276440_c0_seq2|m.82383	17	1260.2	1269.2	1114.4	1423.1	1454.4	1335.7	1456.9	1496.1	1412.8	1750.5	1625.8	1521.7	1560.2	1521.4	1415.8	1263.2	1269.1	1159.9	1214.6	1404.4	1455.27	1632.67	1499.13	1230.73	2.3998	2.72311	2.93875	2.99755	3.03612	2.55449	3	3
comp2259936_c0_seq1|m.51780	14	679.4	1002	1955.5	710.6	1083	2060	689.7	1063.1	2023.7	828.8	1200.1	2320.7	817.6	1224.7	2254	683.3	1072.6	2112.4	1212.3	1284.53	1258.83	1449.87	1432.1	1289.43	2.39526	2.49069	2.54207	2.66193	2.90036	2.67633	3	3
comp2264068_c0_seq1|m.58373	15	1521	1207.7	907.9	1674.3	1351.7	981.1	1689.7	1300.4	965.7	1926	1604.9	1100.5	1710.5	1428.9	1042.8	1648.8	1342.1	989.4	1212.2	1335.7	1318.6	1543.8	1394.07	1326.77	2.39506	2.5899	2.66276	2.83439	2.82333	2.75382	3	3
comp2266692_c0_seq1|m.62504	9	1001.5	1002.2	1622.9	1204.2	1138.8	1847.3	1075.9	1029.6	1670.5	1106	1085.1	1736.5	1156.3	1130	1807.6	1129.9	1066	1708.8	1208.87	1396.77	1258.67	1309.2	1364.63	1301.57	2.38847	2.70831	2.54173	2.40367	2.76372	2.70151	3	3
comp2272093_c0_seq1|m.72467	9	1273.6	1349	1001.3	1549.3	1688.1	1239.4	1337.5	1487.5	1101.4	1460.7	1581.6	1206.2	1424.7	1594.3	1171.5	1434.3	1587.3	1174.9	1207.97	1492.27	1308.8	1416.17	1396.83	1398.83	2.3867	2.89349	2.64297	2.60006	2.82893	2.9034	3	3
isotig10568|m.92324	3	1509.7	1296	810	1261.6	1063.4	649.2	1104.2	923.6	581.2	1100.6	892.5	577.4	993.4	842.5	529.2	931.2	785	480.7	1205.23	991.4	869.667	856.833	788.367	732.3	2.3813	1.92231	1.75619	1.57313	1.59664	1.51995	3	3
comp2037149_c0_seq1|m.4742	9	1136.3	744	1734.6	1014.4	639.5	1473.7	974.9	661.3	1484.8	1070.9	681.7	1579.4	1027.3	644.5	1490.3	1019.8	640.7	1496.1	1204.97	1042.53	1040.33	1110.67	1054.03	1052.2	2.38077	2.02146	2.10083	2.03917	2.13468	2.18393	3	3
comp2275714_c2_seq1|m.80469	7	1004	1425	1171.5	926.7	1209.6	1056.7	867.8	1173.1	970.8	692.8	1077	803.1	705.3	1035.2	814.6	760.4	1024.7	850.5	1200.17	1064.33	1003.9	857.633	851.7	878.533	2.37129	2.06373	2.02726	1.5746	1.7249	1.82347	3	3
comp2265768_c0_seq2|m.60943	13	1007.5	1091	1494.6	1161.3	1172.9	1866	1087.4	1094.3	1625.8	1193.2	1275.6	1748.3	1208.9	1144.1	1654.5	1214.4	1173.5	1890.9	1197.7	1400.07	1269.17	1405.7	1335.83	1426.27	2.36641	2.71471	2.56294	2.58084	2.70539	2.96034	3	3
comp2276277_c0_seq18|m.81972	13	1030.6	977.4	1582.5	1169.3	1111.6	1684.4	1091	1054.5	1546.5	1062.7	1044.8	1573.6	1157.9	1123.3	1574.8	1020.9	953.3	1550.6	1196.83	1321.77	1230.67	1227.03	1285.33	1174.93	2.3647	2.56289	2.48519	2.25282	2.60312	2.43868	3	3
comp2269421_c0_seq7|m.67382	10	1607	600.2	1380.6	1780.5	621.4	1419.7	1688.9	644.6	1416.4	1658.5	666.2	1369	1663.3	700.5	1456.1	1659	617.7	1379.8	1195.93	1273.87	1249.97	1231.23	1273.3	1218.83	2.36292	2.47001	2.52417	2.26053	2.57875	2.52979	3	3
comp2276465_c0_seq3|m.82450	15	1973.1	834.5	775.9	2209.6	945.3	880.5	2068.4	847.4	836.3	2052.7	834.6	785.5	1958.1	818.7	800	1940.3	803.4	744.8	1194.5	1345.13	1250.7	1224.27	1192.27	1162.83	2.36009	2.6082	2.52565	2.24774	2.41464	2.41356	3	3
Pdu_trscr_assembly_1|2589;|m.58494	17	1374	968.5	1237.6	1418.4	1082.8	1470.8	1291.4	973	1254.2	1247.3	949.8	1228.9	1183.2	932.4	1143.3	1307.6	969.3	1269.6	1193.37	1324	1172.87	1142	1086.3	1182.17	2.35785	2.56722	2.36847	2.0967	2.20003	2.45369	3	3
comp2276885_c0_seq1|m.83614	12	1615.3	897.6	1056	1752	926.7	1148.1	1677.7	872.6	1093.6	2000.7	1167.8	1337.3	1758.3	901.3	1151.2	1731.8	866.1	1113.5	1189.63	1275.6	1214.63	1501.93	1270.27	1237.13	2.35047	2.47337	2.45281	2.75753	2.57261	2.56778	3	3
comp2265464_c0_seq1|m.60472	8	1069	953.5	1532	1181.2	954.9	1492.1	1009.2	897.8	1375.2	949.1	868.8	2043.9	861.1	794.9	1206.3	920.5	812.8	1224.1	1184.83	1209.4	1094.07	1287.27	954.1	985.8	2.34099	2.34501	2.20934	2.3634	1.93229	2.04611	3	3
comp2276314_c0_seq1|m.82075	12	911.3	1018.9	1605.7	938.5	1097.4	1637.1	1007.7	1152.9	1812.4	1197.3	1389.4	2137.3	1177.3	1306.5	2144.3	1064.6	1184	1930.9	1178.63	1224.33	1324.33	1574.67	1542.7	1393.17	2.32874	2.37397	2.67434	2.89106	3.12435	2.89164	3	3
comp2269580_c0_seq1|m.67656	7	1648.6	602.1	1281.6	1706.8	653	1331.7	1569.5	597.9	1160.2	1547.2	590.3	1111.6	1568	572.9	1109.8	1626.9	602.4	1162.8	1177.43	1230.5	1109.2	1083.03	1083.57	1130.7	2.32637	2.38592	2.2399	1.98843	2.19449	2.34687	3	3
comp2231997_c0_seq1|m.23466	11	1601.7	687.9	1241.3	1631.1	742	1282.4	1601.6	701.8	1225.5	1713	727.9	1392.3	1661.5	713.4	1284	1595.2	718.8	1243.6	1176.97	1218.5	1176.3	1277.73	1219.63	1185.87	2.32545	2.36266	2.3754	2.3459	2.47006	2.46137	3	3
comp2263983_c0_seq1|m.58208	8	1220.6	894.1	1411.8	1270.8	953.4	1508.2	1128.2	914.1	1452.3	1206.7	961.5	1414.6	1101.2	937.2	1431.6	1170.6	935.6	1475.5	1175.5	1244.13	1164.87	1194.27	1156.67	1193.9	2.32255	2.41236	2.35232	2.19266	2.34254	2.47804	3	3
comp2277911_c0_seq5|m.86869	13	1321.6	1477	727.5	1455.6	1640.9	761.1	1353	1510.4	736.2	1250.7	1438.7	769.1	1217.2	1353.9	653.2	1207.1	1322.3	665.2	1175.37	1285.87	1199.87	1152.83	1074.77	1064.87	2.32229	2.49328	2.42299	2.11659	2.17667	2.21022	3	3
comp2275495_c0_seq1|m.79975	7	1315.3	858	1341.2	1220.3	803.3	1239.9	1221.4	793.6	1236.6	1051.4	756	1159.7	1106	738.5	1173.6	1173.7	762.7	1185.9	1171.5	1087.83	1083.87	989.033	1006.03	1040.77	2.31465	2.10929	2.18875	1.81585	2.03747	2.1602	3	3
comp2217905_c0_seq1|m.17239	9	1129	1291.9	1076.5	1327.1	1472.3	1285.8	1179.4	1369	1107.8	1200.6	1412.3	1128.3	1242.2	1440.5	1158.1	1238.7	1413.2	1168.7	1165.8	1361.73	1218.73	1247.07	1280.27	1273.53	2.30338	2.64038	2.46109	2.2896	2.59286	2.64333	3	3
comp2278485_c0_seq1|m.89374	11	1244	1077.5	1175.9	1395.3	1218.9	1310.7	1158.9	1070.3	1125.8	1138.5	1054.8	1144.7	1104.4	958.9	1109.6	1087.9	965.5	1106.3	1165.8	1308.3	1118.33	1112.67	1057.63	1053.23	2.30338	2.53678	2.25835	2.04284	2.14197	2.18608	3	3
comp2243258_c0_seq1|m.31584	8	946.8	1279.7	1268.4	989.4	1329.9	1260.3	1092.4	1499.7	1462.8	825.7	1056.2	976.2	704.9	955.1	918.1	786.6	1052	1051.9	1164.97	1193.2	1351.63	952.7	859.367	963.5	2.30174	2.3136	2.72947	1.74914	1.74043	1.99983	3	3
comp2252318_c0_seq1|m.41154	6	1290.1	399.3	1785.1	1200.9	424.4	1707.6	1129.7	383.5	1615.3	1168	366.5	1654.9	962.6	338.8	1413.7	1124.9	373.8	1553.3	1158.17	1110.97	1042.83	1063.13	905.033	1017.33	2.2883	2.15415	2.10588	1.9519	1.83292	2.11156	3	3
comp2278100_c0_seq14|m.87565	11	1209.1	868.3	1390	1253.9	867.2	1410.2	1147.6	805.6	1337.4	1381.8	908.3	1510.1	1202.3	910.7	1436.8	1213.5	872.6	1369.5	1155.8	1177.1	1096.87	1266.73	1183.27	1151.87	2.28363	2.28238	2.215	2.3257	2.39641	2.3908	3	3
comp2233777_c0_seq1|m.24586	17	909.9	965.8	1584.9	902.9	994.1	1529.9	909.3	987.7	1474	969.3	1032.7	1477.3	961.6	998.4	1464.1	878.1	939.8	1441.8	1153.53	1142.3	1123.67	1159.77	1141.37	1086.57	2.27915	2.2149	2.26912	2.12931	2.31155	2.25526	3	3
comp2276743_c1_seq1|m.83170	13	1339.7	528.5	1583.6	1330.1	557.5	1547.2	1286.1	532	1476	1491.3	564.3	1641	1220.9	507.4	1440	1209.9	507.4	1489.8	1150.6	1144.93	1098.03	1232.2	1056.1	1069.03	2.27335	2.22001	2.21735	2.2623	2.13886	2.21887	3	3
comp2254376_c0_seq1|m.43911	15	1680	571.5	1192	1956.8	649.3	1272.3	1936.5	664.8	1279.3	2274.7	804.8	1652	2297.4	765.1	1547.8	2115.6	704.2	1335.7	1147.83	1292.8	1293.53	1577.17	1536.77	1385.17	2.26789	2.50672	2.61214	2.89565	3.11233	2.87503	3	3
comp2265406_c0_seq1|m.60324	8	1009	1339.9	1083.7	1024.2	1426.5	1157.1	988.8	1350.4	1108.4	1143.7	1402.5	1147.6	1058.3	1367.6	1159.2	1052.4	1373	1138.5	1144.2	1202.6	1149.2	1231.27	1195.03	1187.97	2.26071	2.33183	2.32068	2.26059	2.42024	2.46573	3	3
comp2276882_c0_seq4|m.83609	8	756.9	1134.1	1535.9	770.8	1134	1583.9	745.4	1129.4	1548.3	884.3	1395.1	1853.4	766.5	1231.7	1651.7	788.2	1161.3	1562.1	1142.3	1162.9	1141.03	1377.6	1216.63	1170.53	2.25695	2.25485	2.30419	2.52925	2.46398	2.42954	3	3
comp2269848_c0_seq4|m.68115	15	1290.1	1292	844.6	1232.6	1205.4	798.8	1243.1	1230.1	798	1449.5	1463.3	857.7	1342.2	1366.3	872.3	1319.8	1278.2	871.4	1142.23	1078.93	1090.4	1256.83	1193.6	1156.47	2.25682	2.09204	2.20194	2.30753	2.41734	2.40035	3	3
comp2277352_c0_seq3|m.84974	17	1263.2	848.2	1314.4	1206.2	812.6	1324.6	1244.2	819.7	1311	1502.9	864	1344.9	1305.9	898.4	1344.6	1230.7	834	1298.2	1141.93	1114.47	1124.97	1237.27	1182.97	1120.97	2.25623	2.16094	2.27174	2.2716	2.3958	2.32666	3	3
comp2263768_c0_seq2|m.57843	11	1293.7	1258.7	870.9	1132.4	1113.1	845.1	1231.6	1157.6	864.4	1364.7	1429.8	977.7	1229.2	1201.3	898.8	1184.6	1180.5	845.1	1141.1	1030.2	1084.53	1257.4	1109.77	1070.07	2.25458	1.99754	2.19009	2.30857	2.24755	2.22102	3	3
comp2276412_c0_seq1|m.82311	11	931.3	1054.2	1419.1	913.4	995	1438.3	920	1000.4	1404.6	1017.2	1190.8	1592.3	941.2	1052.8	1463.9	881.4	965.5	1367.5	1134.87	1115.57	1108.33	1266.77	1152.63	1071.47	2.24227	2.16307	2.23815	2.32576	2.33437	2.22392	3	3
comp2226655_c0_seq1|m.20834	5	642.2	1008	1751.8	603.6	1008.6	1605.9	578.8	892.2	1496.8	671.7	1010.3	1720.2	539	803.8	1377.6	585.7	942.5	1457.1	1134	1072.7	989.267	1134.07	906.8	995.1	2.24055	2.07995	1.99771	2.08213	1.83649	2.06542	3	3
comp2269147_c0_seq5|m.66902	7	1371	1215.9	811.3	1295.4	1038.9	734.6	1232.2	1033.4	717.9	1186.2	1102.7	731	1229.1	1083.9	728.1	1202.7	1037.6	713.4	1132.73	1022.97	994.5	1006.63	1013.7	984.567	2.23805	1.98352	2.00828	1.84816	2.05299	2.04355	3	3
comp2270774_c0_seq1|m.69818	12	825.5	1537.3	1032.6	898.7	1600.8	1076.4	809.9	1442.8	994.6	895.9	1572.6	1074.5	847.9	1552.2	1084.6	818.2	1448.1	971.4	1131.8	1191.97	1082.43	1181	1161.57	1079.23	2.23621	2.31121	2.18585	2.1683	2.35246	2.24004	3	3
comp2267186_c0_seq2|m.63356	11	839.7	1756.3	785.4	793.9	1811.1	848.8	799	1796.1	828.6	1001.3	2161.3	908.1	874.8	1919.3	902.5	802	1784.8	848.8	1127.13	1151.27	1141.23	1356.9	1232.2	1145.2	2.22699	2.23229	2.30459	2.49125	2.49551	2.37696	3	3
Pdu_trscr_assembly_1|20330;|m.50955	11	1307	1053.7	995.4	1128.9	855.3	932.5	1148.1	827.3	885.3	2966.1	2379.3	1800.5	2647.9	2169.6	1576.3	2298.1	1928.8	1429.3	1118.7	972.233	953.567	2381.97	2131.27	1885.4	2.21032	1.88515	1.92562	4.37326	4.31634	3.91331	3	3
comp2275391_c0_seq1|m.79711	6	1368.5	758.6	1219.8	1276.9	752.3	1196.9	1160.6	675.4	1100.7	1253.7	737.3	1166.2	1048.2	633.3	1027.2	1078.6	641.3	1018.1	1115.63	1075.37	978.9	1052.4	902.9	912.667	2.20426	2.08512	1.97678	1.93219	1.8286	1.89432	3	3
Pdu_trscr_assembly_1|18157;|m.24773	9	1142.7	1041	1158.2	1184.2	1089.2	1294	1123.3	1031.7	1119.4	1226.9	1164.5	1147.2	1235	1096.2	1160.9	1149.6	1019.2	1165.9	1113.97	1189.13	1091.47	1179.53	1164.03	1111.57	2.20097	2.30571	2.20409	2.16561	2.35746	2.30715	3	3
comp2263277_c0_seq1|m.57091	7	1423.2	947.1	960.8	1163.3	777.4	798.5	1214.2	795.7	860.9	1078.6	715.4	654.3	955.9	596.7	610.9	979.1	624.2	676	1110.37	913.067	956.933	816.1	721.167	759.767	2.19386	1.77042	1.93242	1.49835	1.46054	1.57696	3	3
comp2279235_c0_seq1|m.91078	7	1555.5	689.4	1083.2	1470.4	597	969.8	1401.8	552.9	947.8	1264.7	597.2	976.5	1080.7	448.2	800.8	1208.6	486	805.1	1109.37	1012.4	967.5	946.133	776.567	833.233	2.19188	1.96303	1.95376	1.73709	1.57274	1.72945	3	3
comp2276443_c0_seq2|m.82390	6	1106.5			1119.4			1183			1551.2			1393.8			1222.7			1106.5	1119.4	1183	1551.2	1393.8	1222.7	2.18622	2.1705	2.38893	2.84798	2.82279	2.53782	3	1
comp2260797_c0_seq1|m.53088	8	689.9	1358.3	1255.8	687.2	1451.6	1275.9	678	1333.8	1203.5	708.7	1276.9	1348.1	595.2	1317	1147.6	651.7	1366.8	1203.8	1101.33	1138.23	1071.77	1111.23	1019.93	1074.1	2.17601	2.20702	2.16431	2.04021	2.06562	2.22939	3	3
comp1970723_c0_seq1|m.3752	4	890.4	1060.9	1343.2	845.9	936.5	1262	867.4	955.3	1298.8	836.1	978.1	1176.8	797.6	871.6	1127	820.4	857.9	1202.7	1098.17	1014.8	1040.5	997	932.067	960.333	2.16975	1.96768	2.10117	1.83048	1.88767	1.99325	3	3
comp2265703_c0_seq1|m.60844	8	1118.1	1175.9	993	1401.9	1479.3	1255	1125	1182.3	1048.6	1109.8	1126.7	1013.4	1073.1	1107.3	975.5	1165.8	1215.2	1073.1	1095.67	1378.73	1118.63	1083.3	1051.97	1151.37	2.16481	2.67335	2.25895	1.98892	2.13049	2.38976	3	3
comp2271896_c0_seq2|m.72093	10	1184.4	720	1352.1	1448.3	872.7	1665.2	1271	798	1454.6	1327.8	778.9	1524.6	1306.2	760.5	1481.1	1237.7	757.5	1437.3	1085.5	1328.73	1174.53	1210.43	1182.6	1144.17	2.14473	2.5764	2.37184	2.22234	2.39506	2.37482	3	3
comp2277496_c1_seq4|m.85444	13	681.6	1282.4	1288.3	616.4	1263.6	1403.9	594.1	1152.8	1233.9	629.6	1175.5	1239.3	627.7	1215.2	1254.4	610.3	1185	1280.5	1084.1	1094.63	993.6	1014.8	1032.43	1025.27	2.14196	2.12248	2.00646	1.86316	2.09093	2.12803	3	3
comp2277724_c0_seq10|m.86198	6	1116.9	1185.9	942.1	1028.6	1099.7	815.9	973.7	1070.7	816.4	1024.5	1018.8	821.4	1009.8	982.7	780.6	959	1013.4	751.5	1081.63	981.4	953.6	954.9	924.367	907.967	2.13709	1.90292	1.92569	1.75318	1.87207	1.88456	3	3
comp2277243_c0_seq1|m.84667	13	626.7	867.1	1739.2	593.4	827.2	1687.9	608.4	846.7	1695.2	588.3	844.5	2121.8	601.8	802.6	1863.2	578.1	820.3	1716.8	1077.67	1036.17	1050.1	1184.87	1089.2	1038.4	2.12925	2.00911	2.12056	2.1754	2.2059	2.15529	3	3
comp2273929_c1_seq1|m.76435	9	949.5	1038.9	1227.3	1000.5	1093.7	1266	905.4	984.4	1145.2	1128.7	1184.2	1345.4	845.2	957.1	1127.8	825.8	934.3	1044.4	1071.9	1120.07	1011.67	1219.43	976.7	934.833	2.11786	2.17179	2.04295	2.23886	1.97806	1.94033	3	3
comp2277388_c0_seq8|m.85093	8	956.7	658.7	1599	896.3	627.3	1458.8	941	623.8	1454.3	1351.5	680.7	1901.5	1021.2	648.1	1623.3	1016.3	658.5	1572.8	1071.47	994.133	1006.37	1311.23	1097.53	1082.53	2.117	1.92761	2.03224	2.40741	2.22278	2.24689	3	3
comp2212572_c0_seq1|m.15390	10	803.5	1211.3	1193.4	959.3	1291.1	1344.1	954.2	1340.7	1332.4	961.9	1674.5	1486.6	1035.1	1497.2	1447.1	938.5	1322	1341.6	1069.4	1198.17	1209.1	1374.33	1326.47	1200.7	2.11292	2.32323	2.44164	2.52326	2.68642	2.49216	3	3
comp2264855_c0_seq1|m.59451	5	1391.7	1092.2	704	1429.9	1096.6	758.8	1386.9	1104.6	714.5	1637.7	860.3	603.6	1407.6	1100.3	637.3	1326	1043.3	691.3	1062.63	1095.1	1068.67	1033.87	1048.4	1020.2	2.09955	2.12338	2.15805	1.89816	2.12327	2.11751	3	3
comp2278333_c0_seq10|m.88591	17	577.9	1265.3	1342.8	879.2	1525.7	1462.9	696.6	1381.5	1355.1	595.2	1500.8	1435.1	682.4	1310.4	1324.9	538	1284.4	1352.9	1062	1289.27	1144.4	1177.03	1105.9	1058.43	2.0983	2.49987	2.31099	2.16102	2.23972	2.19687	3	3
comp2259230_c0_seq1|m.50704	13	671.5	921.2	1587.2	836.1	1110	1763.2	768.3	1042.5	1697.6	757.7	1085.4	1787.6	810.8	1124.3	1804.3	810.4	1102.1	1724.9	1059.97	1236.43	1169.47	1210.23	1246.47	1212.47	2.09428	2.39743	2.3616	2.22197	2.5244	2.51658	3	3
comp2110333_c0_seq1|m.6080	11	1112.8	704.6	1362.2	1380.8	953.2	1690.5	1150.4	790.3	1437.8	1083.3	692.5	1347.3	1155.8	788.3	1403.7	1197.2	824.6	1475.2	1059.87	1341.5	1126.17	1041.03	1115.93	1165.67	2.09408	2.60115	2.27417	1.91132	2.26004	2.41944	3	3
comp2269185_c0_seq2|m.66963	5	788.9	970.8	1407.4	874.6	1060.5	1636.7	758.8	943.1	1433.4	777.9	959.9	1460.7	695.5	885.8	1369.2	733.8	895.6	1409.8	1055.7	1190.6	1045.1	1066.17	983.5	1013.07	2.08585	2.30856	2.11046	1.95747	1.99183	2.10271	3	3
comp2274474_c0_seq5|m.77718	8	760	1203.2	1200.9	945.4	1400.1	1473.9	765.2	1192.5	1225.6	667	1047.2	1087.6	648.5	1037.7	1037.4	806.4	1276	1291.5	1054.7	1273.13	1061.1	933.933	907.867	1124.63	2.08387	2.46859	2.14277	1.71469	1.83866	2.33427	3	3
comp2274358_c0_seq3|m.77437	11	1128.9	1488.9	535.7	1122	1548.1	571	1095.3	1407.2	531.7	1159	1515.8	553.3	1193.1	1508.6	555.2	1082.6	1546.1	548.8	1051.17	1080.37	1011.4	1076.03	1085.63	1059.17	2.07689	2.09482	2.04241	1.97558	2.19868	2.19839	3	3
comp2258527_c0_seq1|m.49534	8	1184	1417.3	542.4	1280	1432.9	571.2	1146.3	1353	544.7	1424.4	1658.7	634.4	1393.3	1497.4	593.5	1298	1430.1	563.9	1047.9	1094.7	1014.67	1239.17	1161.4	1097.33	2.07044	2.12261	2.049	2.27509	2.35212	2.27761	3	3
comp2266441_c0_seq1|m.62027	13	1052.4	677.4	1408.3	1184	731.2	1434.9	1119.6	682	1562.9	960.4	667.7	1449.5	1043.8	635	1470.2	1052.6	643.2	1425.3	1046.03	1116.7	1121.5	1025.87	1049.67	1040.37	2.06675	2.16527	2.26474	1.88348	2.12584	2.15937	3	3
comp2236625_c0_seq1|m.26456	8	1164.8	934	1033.5	1319.1	1078.4	1172.9	1153	1093.6	1059.2	1218.1	1099.5	1160.6	1247.1	1039.6	1129.1	1268.3	989.9	1135.7	1044.1	1190.13	1101.93	1159.4	1138.6	1131.3	2.06293	2.30765	2.22523	2.12864	2.30595	2.34811	3	3
comp2270044_c0_seq2|m.68460	9	1179.2	1042.3	909.4	1270	1017.9	889	1211	965.5	848	1310.4	1123.4	925.1	1240.6	1048.3	890.7	1221.3	996.5	863.8	1043.63	1058.97	1008.17	1119.63	1059.87	1027.2	2.06201	2.05332	2.03588	2.05563	2.14649	2.13204	3	3
comp2268798_c0_seq2|m.66233	10	305.3	2118	701.4	277.2	1918.7	615	329.9	2042.7	713.7	414.5	2608.5	937.2	384	2248.7	823.9	313.3	2162.9	676.3	1041.57	936.967	1028.77	1320.07	1152.2	1050.83	2.05792	1.81677	2.07748	2.42362	2.33349	2.18109	3	3
comp2271539_c0_seq2|m.71326	8	841.5	1288.9	989.3	898.7	1434.7	990.3	825.1	1355.1	953.5	860.1	1348.8	968	766.6	1249.7	899.7	760.1	1235.8	872	1039.9	1107.9	1044.57	1058.97	972	955.967	2.05463	2.1482	2.10938	1.94425	1.96854	1.98419	3	3
comp2231629_c1_seq1|m.23236	11	1170.7	1132.9	801.5	1258.4	1190.5	804.1	1173.1	1125.7	776.2	1279.7	1268.6	925.3	1274.1	1167.6	844.1	1199	1129.2	799.6	1035.03	1084.33	1025	1157.87	1095.27	1042.6	2.04502	2.10251	2.06987	2.12583	2.21819	2.16401	3	3
comp2260097_c0_seq1|m.51984	12	1423.5	775.2	902.2	1644.6	815.9	968.5	1349.6	798.2	890.8	1369.7	755.7	827.3	1316.6	792.2	849.9	1376.2	773.3	857.4	1033.63	1143	1012.87	984.233	986.233	1002.3	2.04225	2.21626	2.04537	1.80704	1.99737	2.08036	3	3
comp2138952_c0_seq1|m.6867	11	1101.8	1198.5	798.8	1026.2	1133.7	788.5	847.4	925.2	634.3	1158.7	1394.3	948.1	1363.1	1452.8	1011.3	1175.9	1287.5	867.8	1033.03	982.8	802.3	1167.03	1275.73	1110.4	2.04106	1.90564	1.62015	2.14266	2.58368	2.30473	3	3
comp2263928_c0_seq2|m.58107	5	1269.6	505.2	1319.5	1200.6	492.6	1242.1	1274.4	513.1	1382.7	961.7	375.4	998.3	770	291	775.5	791.6	327.5	834.7	1031.43	978.433	1056.73	778.467	612.167	651.267	2.0379	1.89717	2.13395	1.42925	1.23979	1.35176	3	3
comp2276768_c0_seq2|m.83249	9	1137	947.7	1009.5	1032	891.4	1013.5	1062.9	863.2	996.7	1128.8	851.3	1000	1161.4	929.9	1022.3	959.3	810.2	953.4	1031.4	978.967	974.267	993.367	1037.87	907.633	2.03784	1.8982	1.96742	1.82381	2.10194	1.88387	3	3
comp2271909_c0_seq2|m.72111	8	793.6	975.1	1321.7	787.8	860.3	1494.1	748.3	864.4	1344.3	878.3	1069.9	1523.1	871.2	1079.2	1522.4	817.9	937.4	1531.9	1030.13	1047.4	985.667	1157.1	1157.6	1095.73	2.03533	2.03089	1.99044	2.12442	2.34443	2.27429	3	3
comp2277854_c0_seq28|m.86657	12	811.5	972.1	1292.2	727.8	843.6	1116.7	777.9	896.9	1240.9	1178.9	1197.1	1681.3	906.7	995.4	1399.1	777.5	856.9	1186.4	1025.27	896.033	971.9	1352.43	1100.4	940.267	2.02572	1.7374	1.96264	2.48305	2.22858	1.9516	3	3
comp2277972_c0_seq17|m.87106	10	1115.5	1135.3	814.8	1183.2	1241	872.2	1092.5	1137.2	756.5	1123.1	1210.6	814.3	1100.6	1151	762.8	1115.7	1162.8	811.8	1021.87	1098.8	995.4	1049.33	1004.8	1030.1	2.019	2.13056	2.0101	1.92656	2.03497	2.13806	3	3
comp2276040_c1_seq5|m.81315	14	903.2	1489.6	637.9	972.6	1519.7	724.8	916.8	1520	689.3	1062.3	1715.5	736.6	995.3	1592.1	740.7	992.6	1562.3	727.2	1010.23	1072.37	1042.03	1171.47	1109.37	1094.03	1.99602	2.0793	2.10427	2.1508	2.24674	2.27076	3	3
comp2251866_c0_seq1|m.40557	8	717.1	1601.8	710.4	743.4	1631.5	794.4	710.4	1574.9	693	624.3	1515.9	682.1	575.8	1304.6	556.5	568.2	1334.4	582.4	1009.77	1056.43	992.767	940.767	812.3	828.333	1.99509	2.04841	2.00478	1.72723	1.64511	1.71928	3	3
comp2265919_c1_seq23|m.61196	7	1370	1179.7	474.7	1442.9	1258	494.1	1247.6	1094.1	432.2	1380.8	1193.4	469.3	1172.7	1060.4	414.1	1211.5	1075.2	418	1008.13	1065	924.633	1014.5	882.4	901.567	1.99187	2.06502	1.86719	1.86261	1.78708	1.87128	3	3
comp2277882_c0_seq2|m.86768	12	800	1059.2	1164.6	822.3	1198.1	1274.1	715.7	1027.2	1143	750.3	1117.3	1105.4	810.5	1104.8	1250.7	773.3	1066.6	1116.7	1007.93	1098.17	961.967	991	1055.33	985.533	1.99147	2.12933	1.94258	1.81946	2.13731	2.04556	3	3
comp2270556_c2_seq1|m.69423	9	813.1	839.2	1358.4	861.8	873.4	1222.6	809.7	845.9	1287	865.7	803.8	1597.4	793.6	834.1	1200.7	796.6	838.8	1218.1	1003.57	985.933	980.867	1088.97	942.8	951.167	1.98284	1.91171	1.98075	1.99933	1.9094	1.97423	3	3
comp2271755_c0_seq2|m.71808	7	1175.2	906.1	926.1	1045	782.1	727.7	1085.3	774.8	804.1	955.5	711.3	674.4	1040.4	753.7	707.8	1152.1	814.1	777.5	1002.47	851.6	888.067	780.4	833.967	914.567	1.98067	1.65124	1.79335	1.4328	1.68899	1.89826	3	3
comp2263691_c0_seq2|m.57661	8	494.2	1516.1	990.2	508.4	1471.8	1016.3	520.4	1546	1026	608	1905.8	1265.6	613.1	1732.6	1073.1	606.7	1707.2	1081.4	1000.17	998.833	1030.8	1259.8	1139.6	1131.77	1.97613	1.93672	2.08158	2.31297	2.30797	2.34908	3	3
comp2276750_c0_seq1|m.83194	12	1127.5	1050.1	816.4	1156.1	983.7	941.7	1057.8	1044.1	866.7	1081.1	1199.5	937.7	1029.1	1250.4	913.6	996.4	997.5	834	998	1027.17	989.533	1072.77	1064.37	942.633	1.97184	1.99166	1.99825	1.96958	2.15561	1.95652	3	3
comp2235922_c0_seq1|m.25983	6	951.2	1247.9	794.1	1084.8	1407.2	973.8	1007.8	1311.3	847.9	960.3	1516.4	845.3	1043.1	1484.8	872.9	1038.6	1397.7	888.3	997.733	1155.27	1055.67	1107.33	1133.6	1108.2	1.97132	2.24005	2.1318	2.03305	2.29582	2.30016	3	3
comp2269326_c0_seq2|m.67220	10	1175.8	842.6	971.8	1378.6	1085.3	1211.9	1118.7	847	941.8	1109.6	877.2	932.6	1095.7	820.7	926.3	1115.4	820.8	893.9	996.733	1225.27	969.167	973.133	947.567	943.367	1.96934	2.37578	1.95712	1.78666	1.91906	1.95804	3	3
comp2266017_c0_seq4|m.61344	10	927.7	580.6	1469.9	811.6	544.1	1377.3	821.4	516	1399.9	973.8	585.3	1640.8	854.9	512.5	1472.1	904.2	601.1	1585	992.733	911	912.433	1066.63	946.5	1030.1	1.96144	1.76642	1.84256	1.95832	1.9169	2.13806	3	3
comp2238888_c1_seq2|m.28027	12	815.9	792.5	1366.1	860.7	822	1400.2	852.7	768.2	1384	936.4	751.3	1354.6	837.4	746.5	1319.2	742.6	706.9	1250.3	991.5	1027.63	1001.63	1014.1	967.7	899.933	1.959	1.99257	2.02268	1.86187	1.95983	1.86789	3	3
comp2261980_c0_seq3|m.55041	14	1179.5	1001.2	791.8	869	819.3	625.3	1058.4	966.2	733	1290.6	1017	882.7	1274.2	1041.2	904.4	1012.1	873.8	724.5	990.833	771.2	919.2	1063.43	1073.27	870.133	1.95769	1.49535	1.85622	1.95245	2.17363	1.80604	3	3
comp2270703_c0_seq5|m.69699	9	548.8	1348.6	1074.1	561.3	1393.8	1071.5	547.8	1302.1	1049.5	555.9	1393.8	1168.8	486.7	1262.9	1010.4	519.1	1313	1068.5	990.5	1008.87	966.467	1039.5	920	966.867	1.95703	1.95618	1.95167	1.90851	1.86323	2.00681	3	3
comp2276173_c0_seq1|m.81727	14	918.3	1306	745.3	973.4	1264.4	751.8	1166	1298.7	691.7	1175.7	1539.3	1364.4	1077.5	1281.9	720.4	868.1	1229.3	673.5	989.867	996.533	1052.13	1359.8	1026.6	923.633	1.95578	1.93226	2.12466	2.49657	2.07912	1.91708	3	3
comp2273599_c0_seq7|m.75677	13	1013.9	642.4	1310.2	982.2	579.3	1191.8	1028.7	622	1256	1164.4	734.8	1461.8	1113.5	720.3	1436.9	1045.6	636.8	1291.7	988.833	917.767	968.9	1120.33	1090.23	991.367	1.95373	1.77954	1.95658	2.05692	2.20799	2.05767	3	3
comp2278133_c0_seq3|m.87701	16	956.6	924.3	1083.7	1006.7	987.1	1219.2	984.1	946.3	1140.6	1717.4	1488.9	1444.7	1331.6	1252.4	1512.4	1149.4	1115.1	1297.4	988.2	1071	1023.67	1550.33	1365.47	1187.3	1.95248	2.07665	2.06718	2.84639	2.76541	2.46434	3	3
comp2271783_c0_seq2|m.71842	10	1400.5	887.5	663	1411.8	925.7	641.6	1359.1	923	650.5	1451.2	963.3	813.6	1295.7	863.2	639.9	1349.2	899.4	619	983.667	993.033	977.533	1076.03	932.933	955.867	1.94353	1.92548	1.97402	1.97558	1.88942	1.98398	3	3
comp2270445_c0_seq1|m.69206	7		994.9	960		1067.2	1098.9		1043.3	974.9		1166.2	980.2		1020.1	878.2		1009.9	931.6	977.45	1083.05	1009.1	1073.2	949.15	970.75	1.93124	2.10002	2.03776	1.97038	1.92226	2.01488	3	2
comp2257652_c0_seq1|m.48314	11	1421	476.5	1033.3	1426.9	515.7	1068.8	1424	505.6	1042.1	1595.7	507.1	1136.4	1533.9	475.1	1079.6	1394.1	456.9	975.7	976.933	1003.8	990.567	1079.73	1029.53	942.233	1.93022	1.94635	2.00034	1.98237	2.08506	1.95569	3	3
comp2275357_c0_seq19|m.79626	10	990.5	1313.4	623.3	1011.7	1332.4	712.5	945.2	1251.4	632.9	947.3	1084.8	655.3	911.9	1100.3	561.6	886.3	1116.2	579.1	975.733	1018.87	943.167	895.8	857.933	860.533	1.92785	1.97557	1.90462	1.64468	1.73753	1.78611	3	3
comp2266503_c0_seq6|m.62129	7	929.4	773.8	1218.5	1162.6	979.1	1452.8	1010	838.4	1310.7	1329.7	1092.9	1546.8	1237.1	1020.7	1549	1186.3	978.4	1474.3	973.9	1198.17	1053.03	1323.13	1268.93	1213	1.92423	2.32323	2.12648	2.42925	2.5699	2.51769	3	3
comp2271567_c0_seq1|m.71391	12	988.2	934.4	998.7	1205.8	1099.1	1148.8	1193.4	1198.3	1282.8	1311.1	1113.4	1260	1182.4	1086.6	1177	1110.7	1021.2	1013.4	973.767	1151.23	1224.83	1228.17	1148.67	1048.43	1.92396	2.23223	2.47341	2.2549	2.32633	2.17611	3	3
comp2272917_c0_seq1|m.74273	5			971			994.8			909.1			886			889.8			885.6	971	994.8	909.1	886	889.8	885.6	1.9185	1.9289	1.83582	1.62668	1.80207	1.83814	3	1
comp2207063_c0_seq1|m.14108	8	1041.5	1087.1	781.2	1097.9	1155.5	832.1	1031.4	1063.2	774.1	914.4	963.3	680.2	934.2	925.1	642.8	972.7	950.4	702	969.933	1028.5	956.233	852.633	834.033	875.033	1.91639	1.99425	1.931	1.56542	1.68912	1.81621	3	3
comp2276513_c0_seq2|m.82580	8	890.5	827.4	1191.6	1022.1	905.3	1400.3	890.9	860.7	1166.2	983	1012.7	1358.1	937.1	923	1228.7	977.6	917.9	1283.9	969.833	1109.23	972.6	1117.93	1029.6	1059.8	1.91619	2.15079	1.96405	2.05251	2.0852	2.19971	3	3
comp2273062_c0_seq1|m.74568	6	976.1	397.2	1530.2	1011.1	406.5	1513.5	923.4	379.3	1443	877.4	345.3	1456.2	915.4	354.3	1401.2	913.3	354	1379.2	967.833	977.033	915.233	892.967	890.3	882.167	1.91224	1.89445	1.84821	1.63947	1.80308	1.83101	3	3
comp2276389_c1_seq15|m.82250	7	908.1	1080	908.1	848.3	976.4	871.2	752.9	851.4	773.5	690.4	792.2	656.6	706.3	789.8	755.6	717.5	830	733.9	965.4	898.633	792.6	713.067	750.567	760.467	1.90743	1.74244	1.60057	1.30918	1.52008	1.57841	3	3
comp2276299_c0_seq1|m.82017	8	1106.4	1098.4	685.4	1085.9	1097.1	777.9	1151.7	1156.9	766.3	1180.2	1184.2	716.9	1013.3	1012.2	726.9	1005.4	1001.8	679.7	963.4	986.967	1024.97	1027.1	917.467	895.633	1.90348	1.91372	2.0698	1.88574	1.8581	1.85896	3	3
comp2275893_c0_seq1|m.80933	8	782.4	1369.2	718.5	878	1478.8	796.6	690.4	1304	641.8	833.2	1753.9	727.4	753.4	1533.5	653	864.9	1645.8	745	956.7	1051.13	878.733	1104.83	979.967	1085.23	1.89024	2.03813	1.7745	2.02846	1.98468	2.2525	3	3
comp2265462_c0_seq5|m.60462	8	1017.3	932.9	916.9	1123.8	1064.7	1021	1053.2	950	928.8	1024.8	978	1025.8	1022.6	926.2	921.5	958.2	946.8	910	955.7	1069.83	977.333	1009.53	956.767	938.333	1.88827	2.07439	1.97361	1.85349	1.93769	1.94759	3	3
comp2261368_c1_seq1|m.54120	14	1285.4	942.2	638.9	1370.7	977.8	664.6	1210.1	890.3	627.7	1288	906.9	618	1185.3	898.6	590.1	1209.6	859.5	608.1	955.5	1004.37	909.367	937.633	891.333	892.4	1.88787	1.94745	1.83636	1.72148	1.80517	1.85225	3	3
comp2251083_c0_seq1|m.39619	5	925.1	1339.4	596.7	945.2	1323.1	621.2	906.3	1300.1	617.5	981.1	1320.1	659.2	876.1	1229.3	590.5	872.4	1246.8	573.7	953.733	963.167	941.3	986.8	898.633	897.633	1.88438	1.86757	1.90085	1.81175	1.81996	1.86312	3	3
comp2262137_c0_seq4|m.55246	2	984.6	771.7	1101.9	852.5	653.6	792.6	858	661.8	832.8	973.9	848.7	820.1	893.8	781.1	785	896.8	766.6	750.4	952.733	766.233	784.2	880.9	819.967	804.6	1.88241	1.48572	1.5836	1.61732	1.66064	1.67002	3	3
comp2258601_c0_seq1|m.49627	9	1123.8	729.2	1004.6	1205.4	820.2	1093.4	1197.6	783.2	1058.5	1408.2	893.1	1191.9	1342.5	833.4	1156.2	1264.8	858.3	1111.2	952.533	1039.67	1013.1	1164.4	1110.7	1078.1	1.88201	2.0159	2.04584	2.13782	2.24944	2.23769	3	3
comp2244716_c0_seq1|m.32883	8	1258.5	568.8	1020.1	1444.6	678.9	1138.2	1291.8	620.1	1030.2	1639.8	669.3	1535	1505.7	705.6	1198.2	1340	613.9	1011.9	949.133	1087.23	980.7	1281.37	1136.5	988.6	1.87529	2.10813	1.98041	2.35257	2.30169	2.05192	3	3
comp2268443_c0_seq2|m.65634	6	1210	574.4	1050.9	1219.8	609.7	1149.7	1219.2	566.5	1087.7	1273.8	579.7	1167.4	1179.8	556.8	1057.5	1190.9	580.6	1037	945.1	993.067	957.8	1006.97	931.367	936.167	1.86733	1.92554	1.93417	1.84878	1.88625	1.94309	3	3
comp2272177_c0_seq2|m.72638	3		943.8			970.1			806.3			888.7			815			827		943.8	970.1	806.3	888.7	815	827	1.86476	1.88101	1.62823	1.63164	1.65058	1.71651	3	1
comp2274106_c1_seq2|m.76871	7	996.4	855.4	961.6	746.2	710.8	750.2	1098.7	979.2	1061.4	823.5	785.2	761.8	864.9	818.2	963.2	798.7	774.9	823.5	937.8	735.733	1046.43	790.167	882.1	799.033	1.8529	1.42658	2.11315	1.45073	1.78647	1.65846	3	3
comp2273466_c0_seq2|m.75427	6	996.6	797.2	1000.6	1093.4	891.3	1072.4	986.8	796.3	954.6	1013.3	790.1	1027.9	1035.9	845.2	1036.4	1050.9	854.3	986.3	931.467	1019.03	912.567	943.767	972.5	963.833	1.84039	1.97589	1.84282	1.73274	1.96955	2.00052	3	3
Pdu_trscr_assembly_1|5614;|m.48467	14	903.4	875.4	1010.4	882	851.8	1141.5	822.6	839.4	1017.2	962.7	904.9	1035.9	958.2	901.9	1067.2	886.4	888.8	1046.1	929.733	958.433	893.067	967.833	975.767	940.433	1.83696	1.85839	1.80345	1.77693	1.97617	1.95195	3	3
Pdu_trscr_assembly_1|11633;|m.54013	6	820.4	977.5	990.4	971	1155.3	1109.5	864	1036.7	1015.3	982	1136.5	1102.6	734.3	899.2	892.7	815.2	976.5	970.5	929.433	1078.6	972	1073.7	842.067	920.733	1.83637	2.09139	1.96284	1.9713	1.70539	1.91106	3	3
comp2269906_c0_seq2|m.68214	7	894.9	1002.1	885.4	1001.2	1146.9	976.5	933.9	1077.7	909.2	778.1	924.7	770.6	835.5	960.7	891.8	890.7	969.2	847.5	927.467	1041.53	973.6	824.467	896	902.467	1.83249	2.01952	1.96607	1.51371	1.81462	1.87315	3	3
comp2244437_c0_seq1|m.32653	4	1057	776.7	947.3	1194.3	864.7	1072.7	1115.8	849	1038.3	1368.6	906.9	1131.6	1133.4	827.7	1000.8	1134.9	836.4	1054.5	927	1043.9	1001.03	1135.7	987.3	1008.6	1.83156	2.02411	2.02147	2.08513	1.99953	2.09344	3	3
comp2143334_c0_seq2|m.7649	13	859	742.4	1172.2	933	854.4	1301.5	858.1	773	1191	985.8	921.2	1323.8	949.8	923.3	1376	906	810.2	1255.9	924.533	1029.63	940.7	1076.93	1083.03	990.7	1.82669	1.99645	1.89964	1.97723	2.19341	2.05628	3	3
comp2258209_c0_seq1|m.49119	7	803.3	1488.4	479.2	762.7	1478.1	476.3	767.5	1472.9	450.8	1123.7	1773.9	519.5	858.5	1570.2	499.3	792.4	1448.2	461.7	923.633	905.7	897.067	1139.03	976	900.767	1.82491	1.75614	1.81152	2.09125	1.97664	1.86962	3	3
comp2276492_c1_seq1|m.82528	13	759.1	866.2	1137.8	841.1	906.9	1166	789.4	817.1	1097.4	844.9	804	1086.3	768.6	818.1	1064.8	733.7	798.5	1040	921.033	971.333	901.3	911.733	883.833	857.4	1.81977	1.8834	1.82007	1.67393	1.78998	1.77961	3	3
comp2269060_c1_seq1|m.66719	10	918.3	897.7	939.3	825.6	791.7	846.2	780.2	782	815.8	765.2	716.7	768.7	809.5	748.5	778	795	797.8	807	918.433	821.167	792.667	750.2	778.667	799.933	1.81464	1.59223	1.6007	1.37736	1.57699	1.66033	3	3
Pdu_trscr_assembly_1|1797;|m.38383	10	1048.3	507.5	1196.2	1051.4	557.5	1167.2	1082	554.7	1210.1	1579	694.5	1889.1	1331.1	653.3	1540.7	1267.7	667.2	1411.2	917.333	925.367	948.933	1387.53	1175.03	1115.37	1.81246	1.79427	1.91626	2.54749	2.37973	2.31504	3	3
comp2264621_c0_seq1|m.59138	7	424.8	1102.8	1212.2	427	1007.1	1137.7	426.5	990	1094.6	504.9	1217.6	1353.8	430.5	1032.7	1050	411.2	937.5	1053.6	913.267	857.267	837.033	1025.43	837.733	800.767	1.80443	1.66223	1.69029	1.88268	1.69662	1.66206	3	3
comp2272320_c0_seq1|m.72954	9	1027	686.1	1026.4	1019.4	657	1018.4	920.8	591.2	962.2	1070.9	706.4	1082.8	1023.3	674.2	1060.2	1001.7	647	983.3	913.167	898.267	824.733	953.367	919.233	877.333	1.80423	1.74173	1.66546	1.75037	1.86168	1.82098	3	3
comp2277230_c0_seq15|m.84635	11	496.8	1332.1	910.2	587.4	1420	1025	513.4	1280.3	909.1	551.4	1347.9	933.6	527.2	1327.9	932.4	513.2	1284.4	935.4	913.033	1010.8	900.933	944.3	929.167	911	1.80397	1.95993	1.81933	1.73372	1.88179	1.89086	3	3
comp2272842_c0_seq2|m.74081	6	1320.7	612.8	796.2	1532.7	751.6	963.5	1457.4	682.4	829.5	1469.2	688.6	850.4	1350.2	642.1	765.2	1446.2	706.8	896	909.9	1082.6	989.767	1002.73	919.167	1016.33	1.79778	2.09915	1.99872	1.841	1.86154	2.10949	3	3
comp2271654_c0_seq4|m.71616	12	379.5	1609.9	739.7	406.6	1699.8	841.3	416.1	1659.6	744.3	461.2	1776.9	796.4	418.7	1625.5	733	409.3	1608.5	750.6	909.7	982.567	940	1011.5	925.733	922.8	1.79738	1.90518	1.89822	1.8571	1.87484	1.91535	3	3
comp2274137_c1_seq25|m.76929	7	1044.7	1199.9	481.6	980.6	1033.9	350.4	814.2	916.4	329.3	981.2	1104.8	774.5	817.1	945.2	632.8	851.1	986.2	682.7	908.733	788.3	686.633	953.5	798.367	840	1.79547	1.5285	1.38658	1.75061	1.61689	1.74349	3	3
comp2276968_c0_seq3|m.83862	9	585.5	510.5	1628.2	688.4	610.8	1769.7	617.1	538.6	1739.2	557.6	497.8	1750.9	548.2	483.3	1610	558.3	485.6	1525.8	908.067	1022.97	964.967	935.433	880.5	856.567	1.79415	1.98352	1.94864	1.71744	1.78323	1.77788	3	3
comp2257972_c0_seq2|m.48746	8	1113.1	578.6	1031.6	1254.1	687.5	1150.5	1195.3	624.2	1064.7	1396	670.2	1251.3	1296.8	611	1125.9	1156.3	611.6	1037.4	907.767	1030.7	961.4	1105.83	1011.23	935.1	1.79356	1.99851	1.94144	2.03029	2.048	1.94088	3	3
comp2236992_c0_seq1|m.26663	6	1307.9	611	789.4	1365.1	591.9	769.5	1224.4	619.9	743.2	1544.2	619.4	790.8	1078.6	536.9	640.6	1204.9	599.8	722.5	902.767	908.833	862.5	984.8	752.033	842.4	1.78368	1.76222	1.74172	1.80808	1.52305	1.74847	3	3
comp2252506_c0_seq1|m.41372	5	536.1	1334	828.3	669.5	1512.7	1043	572.5	1338.4	901.9	467.7	1404.5	689.5	465.1	1219.9	700.9	438	1155.3	667.1	899.467	1075.07	937.6	853.9	795.3	753.467	1.77716	2.08454	1.89338	1.56775	1.61068	1.56388	3	3
comp2276031_c0_seq51|m.81296	7	1194.9	747.5	749.5	1319.2	833.4	798	1250.3	778.7	721.7	1235.7	736.3	763	1283.2	801.3	745.9	1208.8	749.4	741.6	897.3	983.533	916.9	911.667	943.467	899.933	1.77288	1.90706	1.85158	1.67381	1.91075	1.86789	3	3
comp2204754_c0_seq1|m.13720	12	959.6	982.6	741.1	1100.7	1033	847.5	1008.5	1037.6	782.4	1228.8	1190.7	975.1	1181.9	1269.9	930	1086.9	1115	857	894.433	993.733	942.833	1131.53	1127.27	1019.63	1.76722	1.92684	1.90394	2.07748	2.28299	2.11634	3	3
comp2251024_c0_seq1|m.39555	5	581.9	1135	965.8	695.1	1242	1020.8	383.9	695.7	582.8	326.1	638.4	544.6	303.6	592.1	508.4	376.4	742	625.7	894.233	985.967	554.133	503.033	468.033	581.367	1.76682	1.91178	1.11901	0.923562	0.947884	1.20668	3	3
comp2271816_c0_seq2|m.71897	9	827.8	1133.4	719.6	879.1	1379.9	790.4	863.8	1192.2	775.6	934.5	1130.1	848.6	912.5	1179	820.7	859.2	1164.2	762.3	893.6	1016.47	943.867	971.067	970.733	928.567	1.76557	1.97092	1.90603	1.78286	1.96598	1.92732	3	3
comp2252186_c0_seq3|m.40915	3	904.9	398.2	1375.9	801.4	354.7	1085.1	929.5	404.9	1294.4	867	424.7	1349.5	767.9	355.2	1101.4	779.1	335.7	1060.9	893	747.067	876.267	880.4	741.5	725.233	1.76439	1.44855	1.76952	1.6164	1.50172	1.50528	3	3
comp2278006_c0_seq3|m.87210	8	1295.3	794.5	586.5	1423	903.9	677.1	1368.8	1162.8	955.3	1462.8	924.6	688.3	1340.6	855.2	676.8	1292.5	818.9	576	892.1	1001.33	1162.3	1025.23	957.533	895.8	1.76261	1.94157	2.34713	1.88231	1.93924	1.85931	3	3
comp2277956_c0_seq3|m.87021	10	505.2	859.2	1303.1	591.2	979.7	1454.4	498.6	846.3	1243.7	583.7	915.3	1444.8	521.8	840.3	1237.5	505.6	848.4	1258.5	889.167	1008.43	862.867	981.267	866.533	870.833	1.75681	1.95534	1.74246	1.80159	1.75494	1.80749	3	3
comp2270925_c0_seq1|m.70117	8	626.9	820.2	1218	712.2	876.6	1331.7	633.2	821.9	1207.5	605.8	745.3	1179.3	603.2	792.1	1276.3	655.5	836.3	1249.2	888.367	973.5	887.533	843.467	890.533	913.667	1.75523	1.8876	1.79227	1.54859	1.80355	1.89639	3	3
Pdu_trscr_assembly_1|12504;|m.67029	14	867.6	696.7	1097.9	967.1	809.4	1246.4	913	754.9	1215.4	1030.7	751.5	1271.4	921.3	690	1189.2	859.5	694.4	1107.5	887.4	1007.63	961.1	1017.87	933.5	887.133	1.75332	1.95379	1.94083	1.86879	1.89057	1.84132	3	3
comp2138816_c0_seq1|m.6842	5	973.4	734.7	949.5	1053.7	818.5	902.4	907.9	706.5	878.7	786	653.2	877	666.9	495.4	734.3	625.4	514.3	656	885.867	924.867	831.033	772.067	632.2	598.567	1.75029	1.7933	1.67818	1.4175	1.28036	1.24238	3	3
comp2268374_c0_seq2|m.65547	4	833.8	841.2	972.7	704.3	825.5	979.6	639.4	715.7	845.4	769	829.6	964	645.3	679.6	788.2	667.1	740.8	878.6	882.567	836.467	733.5	854.2	704.367	762.167	1.74377	1.6219	1.48122	1.5683	1.42652	1.58194	3	3
comp2271652_c0_seq2|m.71610	5	835.4	473.7	1334.3	780.1	485.3	1243.4	781.9	453.1	1268.6	880.7	524.2	1360.6	816.5	461.7	1318	772.8	461.8	1286.2	881.133	836.267	834.533	921.833	865.4	840.267	1.74094	1.62151	1.68525	1.69247	1.75265	1.74405	3	3
comp2274618_c2_seq9|m.78002	6	238.8	765.4	1633.6	277.7	821.1	1706.5	224.5	762.4	1595.4	233.3	792.7	1583.5	182.5	707.1	1463.3	213.1	707.2	1460.5	879.267	935.1	860.767	869.833	784.3	793.6	1.73725	1.81315	1.73822	1.597	1.5884	1.64718	3	3
comp2273385_c0_seq1|m.75218	10	596.9	910.2	1129.1	666.5	985.9	1237.8	646.6	936.7	1195.4	711.3	1498.6	1604.5	609.5	906.3	1129.9	613.2	916.3	1136.2	878.733	963.4	926.233	1271.47	881.9	888.567	1.7362	1.86802	1.87042	2.33439	1.78607	1.8443	3	3
comp2277388_c0_seq8|m.85092	12	545.2	1478.4	579.1	443	1236.5	474.3	513.5	1323.2	533.9	499.3	1367.9	519.7	504.1	1273.2	523.6	502.1	1272	514.8	867.567	717.933	790.2	795.633	766.967	762.967	1.71414	1.39206	1.59572	1.46077	1.5533	1.5836	3	3
Pdu_trscr_assembly_1|9809;|m.63961	8	829.4	1198.8	570.1	887.8	1146.9	612.6	858.4	1104.4	582.8	925.6	1221.1	596.3	891.5	1069.1	596.3	883.1	1186	585.6	866.1	882.433	848.533	914.333	852.3	884.9	1.71124	1.71103	1.71352	1.6787	1.72612	1.83669	3	3
comp2274177_c0_seq1|m.77049	7	1157.8	458.5	963	1077.7	410.1	938.8	1201.7	425.5	966.1	1403.4	492.3	1163.9	1379.2	481.1	1126.3	1258.1	485.5	1086.2	859.767	808.867	864.433	1019.87	995.533	943.267	1.69872	1.56838	1.74562	1.87246	2.0162	1.95783	3	3
comp2270876_c0_seq2|m.70018	12	1059.5	951.7	567.8	1219.8	1119.8	621.2	1149.3	1056.4	574.3	1173.7	1086.9	573	1092.4	997.1	487.7	1121.7	1078.2	535.6	859.667	986.933	926.667	944.533	859.067	911.833	1.69853	1.91365	1.8713	1.73415	1.73982	1.89259	3	3
comp2267483_c0_seq3|m.63903	10	530.6	861.7	1186	699.1	957.6	1418.2	564.2	834.3	1179.7	558.2	834.8	1111	541.6	771.3	1034	587.1	922.8	1303.4	859.433	1024.97	859.4	834.667	782.3	937.767	1.69807	1.9874	1.73546	1.53244	1.58435	1.94642	3	3
comp2268869_c0_seq6|m.66344	5	282.3	1288.8	999.8	275	1066.8	864.4	272.5	1232.9	984.9	303	1024.4	829	257.5	1304.8	1009.2	292.7	1332.9	1057.6	856.967	735.4	830.1	718.8	857.167	894.4	1.69319	1.42593	1.67629	1.31971	1.73598	1.8564	3	3
comp2277982_c0_seq2|m.87136	8	1060.1	566.5	944.2	1119.1	604.5	1019.2	1179.9	625.1	1062.6	1401.7	704.8	1113.6	1231.8	669.8	1090.1	1080	594.4	974.2	856.933	914.267	955.867	1073.37	997.233	882.867	1.69313	1.77275	1.93026	1.97069	2.01964	1.83247	3	3
comp2275857_c0_seq4|m.80830	15	726.5	1308.7	533.7	787.9	1391.8	579.6	694.8	1283.6	501	630.5	1197.5	475.8	650	1276.6	499.4	661.5	1240.8	470.7	856.3	919.767	826.467	767.933	808.667	791	1.69187	1.78342	1.66896	1.40991	1.63775	1.64179	3	3
comp2262137_c0_seq3|m.92268	6	863.1	687.9	1014.1	851.6	665.2	973.9	710	578.8	831.3	739.7	641	928.8	805.1	661.6	978.8	722.3	644.4	818.6	855.033	830.233	706.7	769.833	815.167	728.433	1.68937	1.60981	1.4271	1.4134	1.65091	1.51193	3	3
comp2257653_c0_seq2|m.48317	5	989.4	858.2	717.1	942.7	795.6	708.9	913	761	638.3	911.4	750.2	645.6	817.3	723.5	645.3	881	759.6	663.3	854.9	815.733	770.767	769.067	728.7	767.967	1.68911	1.5817	1.55648	1.412	1.4758	1.59398	3	3
comp2226333_c0_seq1|m.20670	4	690	955.7	917.8	727.2	938.5	966.1	673.8	889.5	865.6	674.1	874.9	875.6	646.6	841.6	844.7	693.8	924.8	903.7	854.5	877.267	809.633	808.2	777.633	840.767	1.68832	1.70101	1.63496	1.48384	1.5749	1.74508	3	3
comp2271348_c0_seq1|m.70894	5	1375.2	731.4	445	1402.4	790.9	458	1326.1	742.4	404.3	1371.9	737.2	453.6	1209	666.4	351.9	1324.2	699.3	392.1	850.533	883.767	824.267	854.233	742.433	805.2	1.68048	1.71361	1.66451	1.56836	1.50361	1.67126	3	3
comp2272050_c1_seq13|m.72384	5	1122.5	355.6	1064.7	893	329.6	940.2	827	359.5	884.4	996.2	374.2	1066.7	923.8	358.1	934.9	795.2	331.4	832.9	847.6	720.933	690.3	812.367	738.933	653.167	1.67469	1.39788	1.39398	1.49149	1.49652	1.3557	3	3
comp2266243_c2_seq5|m.61695	7	1059	588.2	893.5	1157.8	639.2	922.7	1000.7	508.6	784	1040.1	544.6	801.8	1041.2	526.3	769.2	1078.6	557.6	788.5	846.9	906.567	764.433	795.5	778.9	808.233	1.6733	1.75782	1.54369	1.46053	1.57747	1.67756	3	3
comp2253778_c0_seq3|m.43179	4	513	1052.3	971.1	629.1	1245.2	1069	535	1036.8	947.2	487	943.5	845	422.4	805.1	726.7	457.9	825.3	760.4	845.467	981.1	839.667	758.5	651.4	681.2	1.67047	1.90234	1.69561	1.39259	1.31925	1.41389	3	3
comp2259963_c0_seq1|m.51818	12	1036.2	682.3	814.5	1189.7	764.4	889.2	1111.2	735.8	852.1	1333.2	844.8	977.4	1131.6	727.7	875.2	1079.4	701.5	820	844.333	947.767	899.7	1051.8	911.5	866.967	1.66823	1.83771	1.81684	1.93109	1.84601	1.79946	3	3
comp2278306_c0_seq2|m.88465	18	497.5	1021.7	1007.8	477.5	995.2	942.2	463.6	907.7	851	439	832.9	816	474.3	817.8	789.4	449.2	878.9	843	842.333	804.967	740.767	695.967	693.833	723.7	1.66428	1.56082	1.49589	1.27778	1.40518	1.5021	3	3
comp1234630_c0_seq1|m.1254	6	958.3	610	956.8	1033.1	684.5	1043.4	953.6	606.4	983	1012.3	567.7	999.9	942.2	565.3	942.4	1014.9	600.6	935	841.7	920.333	847.667	859.967	816.633	850.167	1.66303	1.78451	1.71177	1.57889	1.65389	1.76459	3	3
comp2253972_c0_seq1|m.43361	9	840.8	1110	564.5	923.4	1178.6	644	888.2	1117.2	569.1	879.6	1323.7	586.9	888.4	1133.3	556.1	895.4	1106.3	570.8	838.433	915.333	858.167	930.067	859.267	857.5	1.65657	1.77482	1.73297	1.70759	1.74023	1.77981	3	3
comp2263802_c0_seq1|m.57913	7	933.5	615.2	958.9	1009.5	642.5	1024.4	893.3	584.5	941.1	867.7	540.3	835.7	869.8	542	902.5	882	571.7	908.6	835.867	892.133	806.3	747.9	771.433	787.433	1.6515	1.72983	1.62823	1.37313	1.56234	1.63439	3	3
comp2265663_c1_seq31|m.60787	4	845.3	812.2	849.9	915.2	850.4	905.7	736.7	744.9	765.3	668.9	665.8	651.3	647.6	618.5	643.1	651.2	616.3	662	835.8	890.433	748.967	662	636.4	643.167	1.65137	1.72654	1.51245	1.21542	1.28887	1.33495	3	3
comp2269738_c0_seq1|m.67939	8	1095	585.2	825.5	1068.3	618.7	872.9	1075.5	557.2	858.5	1307.3	663.5	1041.5	1113	558.7	854.3	1072	540.6	824	835.233	853.3	830.4	1004.1	842	812.2	1.65025	1.65454	1.6769	1.84351	1.70526	1.68579	3	3
comp2273305_c0_seq2|m.75059	7	505.3	915.8	1076.1	571.9	1026.5	1178.8	549.9	932.5	1077.9	590.9	988.8	1098.1	580.4	960.1	1089.3	538.3	978.6	1077.5	832.4	925.733	853.433	892.6	876.6	864.8	1.64465	1.79498	1.72341	1.6388	1.77533	1.79497	3	3
comp2265170_c0_seq1|m.59942	9	974.8	827.3	694.1	1138	908.2	850.3	1070.5	880.2	841.4	873.6	741.8	660.4	821.7	675.2	596.3	855.9	671.2	593.9	832.067	965.5	930.7	758.6	697.733	707	1.64399	1.87209	1.87944	1.39278	1.41308	1.46744	3	3
comp2272678_c0_seq2|m.73718	4	1027.4	369.4	1088.2	1057.5	408.9	1121.2	1022.1	398.2	1068.5	1139.5	413	1197.2	1015	448.1	1056.7	956.2	364.6	999.2	828.333	862.533	829.6	916.567	839.933	773.333	1.63662	1.67244	1.67528	1.6828	1.70107	1.60512	3	3
comp2203251_c0_seq1|m.13504	5	865.3	686.4	926.3	1047.8	820.9	1096.8	875.2	729.6	996.5	946.4	652.9	1011.5	998.5	778.5	1054.1	926.2	763.1	999	826	988.5	867.1	870.267	943.7	896.1	1.63201	1.91669	1.75101	1.5978	1.91123	1.85993	3	3
comp2275625_c0_seq11|m.80264	7	664.3	710.1	1101.6	756.4	835.5	1147.6	574.5	611.4	944.7	591.7	620.4	1009.8	558.1	585.6	919.4	664.1	706.7	1081.5	825.333	913.167	710.2	740.633	687.7	817.433	1.63069	1.77062	1.43417	1.35979	1.39276	1.69665	3	3
comp2258554_c1_seq2|m.49570	6	838.7	1311.8	321.4	688.2	1135.2	235.6	717.3	1130.6	269	935.6	1525.2	360.7	853.3	1345.6	349.3	775.8	1210.1	291.9	823.967	686.333	705.633	940.5	849.4	759.267	1.62799	1.33079	1.42495	1.72674	1.72025	1.57592	3	3
comp2265997_c0_seq1|m.61310	7	993.5	764.7	708.7	1052.1	782.9	737.1	916	704.7	649.9	968.6	691.4	686.4	858.2	599.3	597.8	879.3	628.3	619.3	822.3	857.367	756.867	782.133	685.1	708.967	1.6247	1.66242	1.52841	1.43599	1.3875	1.47152	3	3
comp2261058_c0_seq1|m.53667	8	415.3	1147.4	896.2	436.7	1133.7	951.1	434.6	1056.6	838	490	1101.5	830.6	416.4	1067.4	832.7	415.3	1046	829.1	819.633	840.5	776.4	807.367	772.167	763.467	1.61943	1.62972	1.56785	1.48231	1.56383	1.58464	3	3
comp1984251_c0_seq1|m.3980	8	1077.3	604.7	776.2	1288.8	779.4	867.7	1162.7	682.1	788.9	1150.2	690.9	745.9	1150	679.9	783.2	1213.2	699.4	811.4	819.4	978.633	877.9	862.333	871.033	908	1.61897	1.89756	1.77282	1.58323	1.76406	1.88463	3	3
comp2272681_c0_seq3|m.73722	9	528.2	582.1	1332.3	593	744.4	1741.8	569.9	652.4	1530.6	688.3	741.9	1942	633.4	675.3	1706.9	649.9	708.1	1751.3	814.2	1026.4	917.633	1124.07	1005.2	1036.43	1.60869	1.99018	1.85306	2.06377	2.03578	2.15121	3	3
comp2260302_c0_seq2|m.52230	5	958.3	569.2	913.8	990.1	617.1	947.8	924.6	548.6	894.7	1020.2	506.8	938.7	969.7	513.2	910.8	893.8	535.7	850	813.767	851.667	789.3	821.9	797.9	759.833	1.60784	1.65137	1.5939	1.509	1.61595	1.5771	3	3
Pdu_trscr_assembly_1|4228;|m.63259	13	395.4	1440.2	604.8	432.2	1505	646	374.5	1391.7	561.9	381.9	1520.7	612.4	315.3	1272	492.7	347.2	1282.6	515	813.467	861.067	776.033	838.333	693.333	714.933	1.60724	1.6696	1.56711	1.53917	1.40417	1.48391	3	3
comp2265589_c0_seq2|m.60673	6	682.4	1166.9	587.4	641	1160.3	595.8	609.1	1081.3	565.9	661.3	1103.4	569	573.9	980.2	505.9	590.8	991.1	524.8	812.233	799.033	752.1	777.9	686.667	702.233	1.60481	1.54931	1.51878	1.42821	1.39067	1.45755	3	3
comp2260150_c0_seq1|m.52048	10	967.2	870.2	589.6	1062.4	980.7	621.8	969	892.6	572.1	1088.8	1194.6	616.2	931	841.1	532.7	922.8	809.7	532.8	809	888.3	811.233	966.533	768.267	755.1	1.59842	1.7224	1.63819	1.77454	1.55593	1.56727	3	3
comp2277605_c1_seq7|m.85828	7	1134	509	783.8	1152.7	536	767.7	1122.5	547	778.9	1274.8	576.5	879.8	1191.3	529.6	817.1	1117.3	482.6	751.7	808.933	818.8	816.133	910.367	846	783.867	1.59829	1.58764	1.64809	1.67142	1.71336	1.62698	3	3
comp2272372_c0_seq1|m.73059	8	839.7	419.5	1166.2	987.4	465.4	1337.2	886.4	439.8	1226.5	860.1	408.4	1111.7	865	417.6	1152	879.3	414.8	1256.5	808.467	930	850.9	793.4	811.533	850.2	1.59737	1.80326	1.7183	1.45667	1.64356	1.76466	3	3
comp2257693_c0_seq3|m.48359	7	604	957.5	858.9	665.7	955.9	866.4	653.1	958.2	857.4	705.4	1111.9	1100.5	775.2	971.7	886	640.4	898.9	827.3	806.8	829.333	822.9	972.6	877.633	788.867	1.59407	1.60807	1.66175	1.78568	1.77743	1.63736	3	3
comp2247098_c0_seq1|m.35275	4	675.4	787.6	957.3	501.1	543	700.1	468	527.2	683.6	623	633.7	899	741.5	775.1	1117.7	699.4	692.8	1034.9	806.767	581.4	559.6	718.567	878.1	809.033	1.59401	1.12733	1.13005	1.31928	1.77837	1.67922	3	3
comp2276031_c0_seq51|m.81297	4	788.4	539.7	1090.1	970.1	776.9	1260.1	840.3	690.2	1130.2	801.7	611.1	1139.8	759	584.8	1082	807.3	646.4	998	806.067	1002.37	886.9	850.867	808.6	817.233	1.59262	1.94358	1.79099	1.56218	1.63762	1.69624	3	3
comp2280060_c0_seq1|m.91212	4		1283.9	326.5		1341.4	358.1		1258.1	297.9		1495.3	296.9		1208	272.8		1303.6	284.8	805.2	849.75	778	896.1	740.4	794.2	1.59091	1.64765	1.57108	1.64523	1.49949	1.64843	3	2
comp2263896_c0_seq3|m.58065	6	607.7	1120.4	685.3	777.7	1425.4	936	739.7	1373.6	907.5	743.8	1139.4	746.8	584.8	1010.7	629	563.7	1007.6	658.6	804.467	1046.37	1006.93	876.667	741.5	743.3	1.58946	2.02889	2.03339	1.60955	1.50172	1.54278	3	3
Pdu_trscr_assembly_1|7925;|m.66076	4	758	1033.5	617.5	818.6	1135	643	746	1053.3	590.2	1042.9	1416.9	887.1	696.5	974.7	543.2	698.9	998.1	549.1	803	865.533	796.5	1115.63	738.133	748.7	1.58656	1.67826	1.60844	2.04829	1.4949	1.55399	3	3
comp2277134_c1_seq4|m.84342	10	1106.3	313	989.5	1165	341	1162.4	1054.1	338.1	1217.5	1162.6	397	1221.2	1067	347.9	1115.5	1042.5	345	1087.6	802.933	889.467	869.9	926.933	843.467	825.033	1.58643	1.72466	1.75666	1.70184	1.70823	1.71243	3	3
comp2272389_c0_seq1|m.73094	7	648.8	1254.6	505.2	664.9	1294	499.6	635.5	1105.5	457.8	725.5	1136.8	570.1	626.9	978.2	457.1	650.1	1014.9	477.9	802.867	819.5	732.933	810.8	687.4	714.3	1.5863	1.589	1.48008	1.48862	1.39216	1.48259	3	3
comp1910314_c0_seq1|m.2848	2	460.5	708.5	1235.6	451	636	1111.9	425	618.6	1092.5	358.8	584.2	975.2	352.9	511.1	1011.3	385.9	595.4	1067.2	801.533	732.967	712.033	639.4	625.1	682.833	1.58367	1.42121	1.43787	1.17393	1.26598	1.41728	3	3
comp2273810_c0_seq1|m.76124	11	489.5	766.5	1145.3	543.7	837.2	1249.5	533.7	813.2	1188.7	515.6	823.5	1314.8	556.9	849.9	1265.4	563	826.2	1255.8	800.433	876.8	845.2	884.633	890.733	881.667	1.58149	1.7001	1.70679	1.62417	1.80396	1.82997	3	3
comp2233247_c0_seq2|m.24200	8	1146.7	511.9	742	1187.3	473.7	762.9	1170	523.6	748	1372.6	602.4	856.4	1358.8	594.1	859.1	1170.3	536.3	762.9	800.2	807.967	813.867	943.8	937.333	823.167	1.58103	1.56664	1.64351	1.7328	1.89833	1.70855	3	3
comp2277446_c0_seq33|m.85284	8	403.2	1067.7	927.3	395.9	1171.1	929	370.9	1057.7	896.1	391.8	1149	1036.3	344.2	994.7	862.9	338	990.5	829.6	799.4	832	774.9	859.033	733.933	719.367	1.57945	1.61324	1.56482	1.57717	1.4864	1.49311	3	3
comp1647029_c0_seq1|m.2129	6	607	743.4	1044.8	508.6	663.2	894.1	518.5	679.3	909.5	643.4	865.6	996	588.6	762.7	926.3	554.7	715.4	936.6	798.4	688.633	702.433	835	759.2	735.567	1.57748	1.33525	1.41848	1.53305	1.53757	1.52673	3	3
comp1876805_c0_seq1|m.2339	10	506.9	635.2	1250.1	605.2	754.2	1381.1	523.9	673.5	1282.5	554.9	671.5	1297.4	487.5	573.7	1263.1	474.7	586.8	1165.5	797.4	913.5	826.633	841.267	774.767	742.333	1.5755	1.77126	1.66929	1.54455	1.56909	1.54078	3	3
comp2272035_c0_seq2|m.72340	10	930.7	803.8	652.2	989.7	869.2	680.4	966.7	816.7	675.2	1070.4	938.7	711.8	1025.6	872.5	727.3	976.3	844.6	655.6	795.567	846.433	819.533	906.967	875.133	825.5	1.57188	1.64122	1.65495	1.66518	1.77236	1.7134	3	3
comp2232491_c0_seq2|m.23761	5	1145.7	986.7	253.5	1146.5	978.2	252.5	1008	822.4	219.6	1048.5	907.6	196.7	848.1	614.9	178	895.9	704.8	202.9	795.3	792.4	683.333	717.6	547	601.2	1.57135	1.53645	1.37991	1.3175	1.10781	1.24784	3	3
comp2262465_c0_seq5|m.55795	6	710.6	727	947	459.3	483.6	607.1	575.3	611.2	751.3	590.5	614.6	752.9	601	646.9	827.3	605.5	642.1	768.7	794.867	516.667	645.933	652.667	691.733	672.1	1.57049	1.00181	1.30439	1.19829	1.40093	1.395	3	3
comp2256040_c0_seq3|m.46044	10	573.7	800.7	1004.5	602.7	925.1	1163	467.5	647.5	860.6	551.6	1022.3	1249.7	441.6	642.3	853.2	473.1	745.8	906.4	792.967	896.933	658.533	941.2	645.7	708.433	1.56674	1.73914	1.32983	1.72803	1.3077	1.47041	3	3
comp2264066_c0_seq3|m.58370	9	931.9	643.8	803.1	790.1	743.2	753.2	786.8	585.8	765.7	853.1	573.1	830.1	817	502.1	751	875.4	594.4	763.7	792.933	762.167	712.767	752.1	690.033	744.5	1.56667	1.47783	1.43935	1.38084	1.39749	1.54527	3	3
comp2277479_c0_seq1|m.85385	10	766.7	414.8	1197.2	758.9	430.8	1189.1	758.7	405.7	1173.8	836.1	433.4	1380	770	392.3	1119.7	771.7	409.7	1199.4	792.9	792.933	779.4	883.167	760.667	793.6	1.56661	1.53749	1.57391	1.62148	1.54054	1.64718	3	3
comp1194211_c0_seq1|m.757	6	843.6	588.7	944.7	905.9	654	998.8	844.9	613.5	948.8	884.5	676.2	1117.3	917.3	630.1	1060.5	859.9	613.3	941.5	792.333	852.9	802.4	892.667	869.3	804.9	1.56549	1.65376	1.62036	1.63892	1.76055	1.67064	3	3
comp2267123_c0_seq2|m.63229	8	1260.8	701.1	412	1421.3	794.7	480.1	1308.1	724.4	445.8	1263.9	677	475.7	1162.7	644.8	420.7	1180.3	663.2	427.8	791.3	898.7	826.1	805.533	742.733	757.1	1.56345	1.74257	1.66821	1.47895	1.50422	1.57143	3	3
comp2271795_c0_seq1|m.71864	10	1219.7	214.3	928.3	1466.7	239.2	1023	1364.5	218.5	897.7	1262.5	207	899.4	1248	184.3	836.1	1206.5	185.2	831.4	787.433	909.633	826.9	789.633	756.133	741.033	1.55581	1.76377	1.66983	1.44976	1.53136	1.53808	3	3
comp2274713_c1_seq7|m.78178	7	815.2	573.5	971.6	824.9	581.3	998.9	783.8	562.9	925.3	700.1	496.8	933.8	755.7	554.2	910.9	735.2	544.5	894.5	786.767	801.7	757.333	710.233	740.267	724.733	1.55449	1.55449	1.52935	1.30398	1.49922	1.50425	3	3
comp2261851_c1_seq1|m.54777	5	917.7	609.9	830	894.1	609.8	843.9	916.8	612.2	862	1137.2	729.3	1049.3	1025.1	681.3	946.2	916.9	622.5	874.4	785.867	782.6	797	971.933	884.2	804.6	1.55271	1.51745	1.60945	1.78446	1.79072	1.67002	3	3
comp2248565_c0_seq1|m.36700	9	874.2	447.7	1027.3	891.7	502	1031.2	823.8	444.9	945.8	782.1	372.4	877.5	764.3	395	920.2	840.1	445.5	947	783.067	808.3	738.167	677.333	693.167	744.2	1.54718	1.56728	1.49064	1.24357	1.40383	1.54465	3	3
comp2277028_c0_seq3|m.84015	2			782.5			809.7			829.2			986.1			817.7			847.1	782.5	809.7	829.2	986.1	817.7	847.1	1.54606	1.57	1.67447	1.81047	1.65605	1.75823	3	1
comp2278414_c0_seq7|m.88958	7	896.3	651.5	799.5	1092.8	705.1	896.3	992.6	753	861.6	1125.1	889.2	1045.8	1116.7	850.3	1071.1	1065.3	775.7	986.5	782.433	898.067	869.067	1020.03	1012.7	942.5	1.54593	1.74134	1.75498	1.87277	2.05097	1.95624	3	3
comp2270228_c0_seq1|m.68797	9	864	865.3	617.5	762.9	757.9	530.7	777.5	769.2	555	843.6	871.4	592.6	769.1	753.8	518.1	779	749.9	527.8	782.267	683.833	700.567	769.2	680.333	685.567	1.5456	1.32594	1.41471	1.41224	1.37784	1.42295	3	3
comp2274819_c0_seq2|m.78403	8	829.5	765.7	749.2	965.6	906.4	860.5	848.6	762	761.8	749.4	696.3	867.4	741.6	671.1	673.9	759.8	727.2	715.1	781.467	910.833	790.8	771.033	695.533	734.033	1.54402	1.76609	1.59693	1.41561	1.40863	1.52355	3	3
comp2264888_c0_seq4|m.59493	4	599.5	979.2	764.8	640.9	1046.7	803.4	605.6	985.4	784.7	493.5	851.5	571.2	714.5	1086	881.6	712.3	1097.6	811.2	781.167	830.333	791.9	638.733	894.033	873.7	1.54343	1.61001	1.59915	1.17271	1.81064	1.81344	3	3
comp2273652_c0_seq6|m.75793	4	780.9			705.1			684.9			741.6			662.3			691.2			780.9	705.1	684.9	741.6	662.3	691.2	1.5429	1.36718	1.38308	1.36157	1.34132	1.43464	3	1
comp2278222_c0_seq3|m.88116	9	932.7	1218.7	185.1	886.1	1183.2	228.4	795.4	1057.3	218.6	814.1	1193.7	191.2	840.7	1174	200.6	801.1	1120.6	190.8	778.833	765.9	690.433	733	738.433	704.167	1.53882	1.48507	1.39425	1.34578	1.49551	1.46156	3	3
comp2277282_c0_seq11|m.84762	12	1248.9	639.7	445.9	1159.3	614.2	438.6	1280.4	606.9	451.3	1508.3	611.1	443.4	1184.7	617.7	478.1	1073.6	523.4	407.4	778.167	737.367	779.533	854.267	760.167	668.133	1.5375	1.42974	1.57418	1.56842	1.53953	1.38677	3	3
comp2270472_c0_seq1|m.69272	7	385.6	1204.8	733.5	377.6	1262.5	771.8	363.6	1223.1	746.9	407.5	1597.5	948.6	390.9	1246.5	766.7	366.8	1199.7	746.5	774.633	803.967	777.867	984.533	801.367	771	1.53052	1.55888	1.57081	1.80759	1.62297	1.60028	3	3
comp2266011_c0_seq7|m.61338	4	788.4	695.6	835.6	717.9	625.3	764.8	690.5	594.1	711.3	786.3	658.1	756.1	745.8	612.1	712.4	652.1	572.4	673.5	773.2	702.667	665.3	733.5	690.1	632.667	1.52769	1.36246	1.3435	1.3467	1.39762	1.31315	3	3
comp2224395_c0_seq1|m.19862	9	1139.3	496.6	682.5	1257.7	570.9	752.1	1077.7	506.3	676.1	1066.4	567.2	722.3	1018.3	474.6	699.7	1122.6	498.5	717.7	772.8	860.233	753.367	785.3	730.867	779.6	1.5269	1.66798	1.52134	1.4418	1.48019	1.61813	3	3
comp2276461_c0_seq7|m.82444	8	552	841.7	917	618.2	893.5	953.1	497.5	738.4	818.9	603.3	896.2	1051	557	829.5	936.3	577.5	861.6	972.6	770.233	821.6	684.933	850.167	774.267	803.9	1.52182	1.59307	1.38314	1.56089	1.56808	1.66856	3	3
comp2273501_c0_seq2|m.75506	8	1268.8	521.3	512.8	1263.3	538.9	534.3	1231.7	543.6	495.5	1474.4	582	564.8	1249.5	556	497.8	1284.1	557.7	489	767.633	778.833	756.933	873.733	767.767	776.933	1.51669	1.51015	1.52854	1.60416	1.55492	1.61259	3	3
comp2264302_c0_seq2|m.58699	5	854.6	1023.2	423.2	806.5	970.4	420.8	760.5	966.7	416.5	892.4	1162.9	457.5	830	1041.6	410.8	832.2	992.8	419.1	767	732.567	714.567	837.6	760.8	748.033	1.51544	1.42044	1.44299	1.53782	1.54081	1.55261	3	3
comp2265300_c1_seq5|m.60168	2			766.7			745.4			768.4			862.8			718.5			666.5	766.7	745.4	768.4	862.8	718.5	666.5	1.51484	1.44532	1.5517	1.58409	1.45514	1.38338	3	1
comp2236398_c0_seq1|m.26280	3	751.1	626.6	921	931.8	756	1074.4	752.5	612.2	899.4	712.7	653.5	874	733.1	564.3	857.4	739.2	566	869.2	766.233	920.733	754.7	746.733	718.267	724.8	1.51392	1.78529	1.52403	1.37099	1.45467	1.50438	3	3
Pdu_trscr_assembly_1|200732;|m.91056	10	602.1	946.6	747.9	581.5	834.2	678.2	524.2	786.8	566	629.4	1044.8	652.8	523.4	859.4	536.5	613.3	883.7	539.7	765.533	697.967	625.667	775.667	639.767	678.9	1.51254	1.35335	1.26346	1.42411	1.29569	1.40912	3	3
comp2259918_c0_seq1|m.51762	6	729.6	694.6	871.1	769.1	833.6	1003.5	780.3	753.2	952.4	921.6	667.1	863.1	641.3	685.8	828.6	624.8	706.1	766.9	765.1	868.733	828.633	817.267	718.567	699.267	1.51168	1.68446	1.67333	1.50049	1.45528	1.45139	3	3
comp2278272_c0_seq3|m.88329	3	900.6	535.5	854.4	749.4	493.7	722.1	803.6	502.5	731.9	898.9	582.4	866.6	834.5	519.8	771.4	809.9	506.8	748.6	763.5	655.067	679.333	782.633	708.567	688.433	1.50852	1.27017	1.37184	1.4369	1.43502	1.4289	3	3
comp2267568_c0_seq2|m.64053	9	581.1	999.6	706.2	649.6	1309.6	900.7	607.5	1181.7	818.4	635.5	1055.6	733.5	643.6	1093.4	821.3	617.7	1171.6	827	762.3	953.3	869.2	808.2	852.767	872.1	1.50615	1.84844	1.75525	1.48384	1.72706	1.81012	3	3
comp2261018_c0_seq2|m.53614	9	446.3	805.4	1035	556.3	920.6	1150.7	507.2	790	1039.1	476.3	850.6	1067.9	486.6	807.4	1048.6	494.2	832	1074.7	762.233	875.867	778.767	798.267	780.867	800.3	1.50602	1.69829	1.57263	1.46561	1.58145	1.66109	3	3
comp2268336_c0_seq2|m.65472	6	851.8	820.6	613.9	735.6	712.9	514.5	729	705.1	505.4	823.7	809.6	504.2	709.3	670.7	438	649.7	649	480	762.1	654.333	646.5	712.5	606	592.9	1.50575	1.26874	1.30553	1.30814	1.2273	1.23061	3	3
comp2277689_c0_seq2|m.86077	8	922.8	926.1	429.4	888.1	988.7	442.8	848.1	836.1	410.6	920.3	711	393.3	933.4	791.6	415.1	916.2	831.9	413.8	759.433	773.2	698.267	674.867	713.367	720.633	1.50049	1.49922	1.41007	1.23905	1.44474	1.49574	3	3
comp2278570_c0_seq7|m.90130	7	1042.3	665.8	569.5	982.8	635.4	558.1	906.7	566.5	530.8	1327.2	671.5	579	926.5	579.7	499.7	883.8	534.8	508.8	759.2	725.433	668	859.233	668.633	642.467	1.50002	1.40661	1.34895	1.57754	1.35415	1.33349	3	3
comp2275144_c0_seq3|m.79172	8	1234.7	547.6	486.4	1354.4	593.9	532.9	1244.3	564.6	497.3	1255.9	558	521.7	1192.1	529.8	466.3	1163.6	506.6	462.8	756.233	827.067	768.733	778.533	729.4	711	1.49416	1.60367	1.55237	1.42938	1.47722	1.47574	3	3
comp2275528_c0_seq1|m.80051	7	968		540.2	1138.4		508.7	1013.2		544.9	1156.5		689.6	1078.1		630.1	1086.9		567.6	754.1	823.55	779.05	923.05	854.1	827.25	1.48995	1.59685	1.5732	1.69471	1.72976	1.71703	3	2
comp2259859_c0_seq1|m.51677	3	1141.4	756.5	363.7	923.6	628	298.4	991.8	689.7	331.3	976.3	724.3	331.8	749.8	531.4	237.4	833.7	562.6	272.6	753.867	616.667	670.933	677.467	506.2	556.3	1.48949	1.19571	1.35487	1.24382	1.02518	1.15465	3	3
comp1194294_c0_seq1|m.785	10	610.8	715	933.7	736.2	852.9	1053.6	649.2	745.8	965.2	653.3	826.2	963.4	659	809.3	1028.3	689.7	775.3	970	753.167	880.9	786.733	814.3	832.2	811.667	1.4881	1.70805	1.58872	1.49504	1.68541	1.68468	3	3
comp2276804_c0_seq1|m.83376	4	856.1	449.1	951.9	728.5	352.1	758.1	672.5	334.4	753.4	810.9	423	914.4	621.3	328.1	704.3	640.9	374.7	739.2	752.367	612.9	586.767	716.1	551.233	584.933	1.48652	1.1884	1.18491	1.31475	1.11638	1.21408	3	3
comp2262197_c0_seq1|m.55346	4	808.5	557.7	888.6	956.9	725.5	1097.3	918	649.9	1004.2	923.5	604.7	1053	954.8	662.2	1060.7	873.5	614	976.8	751.6	926.567	857.367	860.4	892.567	821.433	1.48501	1.7966	1.73135	1.57968	1.80767	1.70496	3	3
comp2268029_c2_seq11|m.64856	12	677.2	672	896.8	519.6	488.1	704.6	498.7	465.6	619.2	1964.9	1970.8	2621.7	1607.6	1725	2017.2	2010.2	2335.3	2424.5	748.667	570.767	527.833	2185.8	1783.27	2256.67	1.47921	1.10671	1.0659	4.0131	3.61156	4.68391	3	3
comp2269459_c0_seq2|m.67456	6	407.3	892.2	942.7	442.3	917.1	962.4	427.6	886.4	923.5	433.8	899.2	933	404.4	818.1	867.8	393.1	866.3	854.1	747.4	773.933	745.833	755.333	696.767	704.5	1.47671	1.50065	1.50613	1.38678	1.41113	1.46225	3	3
comp2268046_c1_seq1|m.64874	10	879.9	811.3	546.8	1017.1	918.1	644.1	940.5	875.1	601	1109.1	957.7	712.2	996.9	878.1	599.3	973.5	860.6	623.8	746	859.767	805.533	926.333	824.767	819.3	1.47394	1.66708	1.62668	1.70073	1.67036	1.70053	3	3
comp2278419_c0_seq3|m.88992	6	507.2	1041	688.2	575.7	1114.4	745.2	502.3	1059.3	665.3	604.6	1290.3	762.5	470.7	1069.1	702.2	482.3	1038.5	677.9	745.467	811.767	742.3	885.8	747.333	732.9	1.47289	1.574	1.49899	1.62632	1.51354	1.5212	3	3
comp2272683_c0_seq1|m.73725	8	1066.3	572	597.9	1269.5	667.2	735.2	1166.5	656.1	681.3	1308.3	680.3	726.4	1211.6	669.1	683.2	1130.5	651.8	628.1	745.4	890.633	834.633	905	854.633	803.467	1.47276	1.72693	1.68545	1.66157	1.73084	1.66766	3	3
Pdu_trscr_assembly_1|1598;|m.14793	7	916.4	528.7	790	950.9	505	782.6	903.6	515.4	771.9	1084	663.5	922.3	979.6	565.6	803.8	968.9	556.2	790.1	745.033	746.167	730.3	889.933	783	771.733	1.47203	1.44681	1.47476	1.6339	1.58577	1.6018	3	3
comp2273519_c1_seq9|m.75533	10	490.8	1003.6	737.5	437.2	889.2	637.4	495.5	931.2	710.2	655.3	1332.1	1011.2	581.5	1154.8	923.6	490.7	987.2	733	743.967	654.6	712.3	999.533	886.633	736.967	1.46993	1.26926	1.43841	1.83513	1.79565	1.52964	3	3
comp2275674_c1_seq1|m.80370	7	849.7	723.5	658.6	1206.9	991.9	801.6	1263.2	1007.3	686.9	1001.6	844.5	612.7	835.7	669.7	536.8	844.8	700.8	625.3	743.933	1000.13	985.8	819.6	680.733	723.633	1.46986	1.93925	1.99071	1.50477	1.37865	1.50196	3	3
comp2273624_c0_seq1|m.75721	5	734.8	794.5	693	840.5	859.9	750.7	657.9	714.7	620.7	687.8	721.8	694.1	619.5	693.9	601.8	718	767.2	655.2	740.767	817.033	664.433	701.233	638.4	713.467	1.4636	1.58422	1.34175	1.28745	1.29292	1.48086	3	3
comp2265386_c0_seq2|m.60299	3	430.7	902.7	888.6	444.7	914.7	884.9	397	846.4	809.7	406	809.6	763.2	357.9	718.1	710.3	366.5	732.2	693	740.667	748.1	684.367	659.6	595.433	597.233	1.46341	1.45056	1.382	1.21102	1.2059	1.23961	3	3
Pdu_trscr_assembly_1|6063;|m.1752	5	903.9	666.9	645.9	1436.7	1241.4	766.6	824.2	557.4	688.5	898.1	578.3	795.2	788.2	488.6	711.9	854.9	583.2	704.5	738.9	1148.23	690.033	757.2	662.9	714.2	1.45992	2.22641	1.39344	1.39021	1.34254	1.48238	3	3
comp2270556_c2_seq1|m.69422	14	352.1	1315.6	548	344.9	1395.4	627.2	367.6	1357	586.2	407.4	1474.9	660	387.2	1317.6	561.9	387.9	1337.8	570.2	738.567	789.167	770.267	847.433	755.567	765.3	1.45926	1.53018	1.55547	1.55588	1.53021	1.58845	3	3
comp2271561_c0_seq5|m.71379	11	634.8	583.1	993	688.1	605.4	1089.7	611.6	566.1	1080.2	623	517.7	1366.1	551.5	498.9	789.6	569.4	523	805.8	736.967	794.4	752.633	835.6	613.333	632.733	1.4561	1.54033	1.51986	1.53415	1.24215	1.31329	3	3
comp2279523_c0_seq1|m.91136	6	996.3	317.4	896.2	1061.9	345.9	947	978	309	919.8	1063.1	317.9	953.7	1008.9	291.5	892.2	1027.9	319.4	895.2	736.633	784.933	735.6	778.233	730.867	747.5	1.45544	1.52198	1.48546	1.42882	1.48019	1.5515	3	3
comp2275057_c0_seq3|m.78965	5		398.5	1074.3		427.1	1163		404.8	1128.3		543.8	1378.7		500.5	1263.1		411.2	1093.8	736.4	795.05	766.55	961.25	881.8	752.5	1.45498	1.54159	1.54796	1.76484	1.78586	1.56188	3	2
comp2276009_c0_seq3|m.81255	6	812.2	642.5	751.4	911.5	727.8	873.3	838	684.5	787.8	977.3	757.8	891.8	883.4	728.8	835.5	885.3	705.1	789.5	735.367	837.533	770.1	875.633	815.9	793.3	1.45293	1.62397	1.55513	1.60765	1.6524	1.64656	3	3
comp2274379_c0_seq3|m.77492	6	335.3	556.6	1313.8	393.9	579	1213.1	373.8	553.2	1136.5	333.3	576.3	1264.5	348.2	531	1097.2	325.1	516.9	1029.1	735.233	728.667	687.833	724.7	658.8	623.7	1.45267	1.41287	1.389	1.33054	1.33423	1.29454	3	3
comp2272257_c1_seq3|m.72829	4	980.2	561.9	663	923.9	627.1	720.9	786.2	529.3	600.2	886.5	546.8	624.2	790.9	551.7	580.6	860.8	620.6	659.3	735.033	757.3	638.567	685.833	641.067	713.567	1.45228	1.46839	1.28951	1.25918	1.29832	1.48107	3	3
comp2266869_c0_seq1|m.62813	6	539.2	871.9	789.9	417.8	764.2	651.5	466.9	817.3	749	395.9	904.7	927.6	411.2	845.6	749.2	435.2	789.9	745.8	733.667	611.167	677.733	742.733	668.667	656.967	1.44958	1.18504	1.36861	1.36365	1.35422	1.36359	3	3
comp2265883_c1_seq1|m.61140	3	583.4	793.9	823.6	694.4	986.2	948.4	661.1	992.4	965.5	659.6	822.3	807.3	741.8	1070.3	1039.5	673.5	1010.9	944.7	733.633	876.333	873	763.067	950.533	876.367	1.44951	1.6992	1.76292	1.40098	1.92507	1.81897	3	3
comp2277769_c0_seq5|m.86350	12	883.1	419.6	897.3	953.1	496.2	1001.9	922.6	488.2	1024.1	748.1	484.4	836.3	956.5	478	1008.6	917.9	458.8	941.7	733.333	817.067	811.633	689.6	814.367	772.8	1.44892	1.58428	1.639	1.2661	1.64929	1.60401	3	3
comp2270799_c0_seq42|m.69874	6	1182.2	536.5	480.3	1167.7	543.8	418.3	1121.2	506.8	415.4	1297.1	575.2	488.5	1242.9	520.9	477.5	1193.3	510.2	448.8	733	709.933	681.133	786.933	747.1	717.433	1.44826	1.37655	1.37547	1.4448	1.51306	1.48909	3	3
comp2232805_c0_seq1|m.23974	7	838.8	937.4	415.3	793	500.1	392.7	818.9	494.1	376.3	756.9	411.8	341.8	902.5	588.7	463.6	844.1	528.4	444	730.5	561.933	563.1	503.5	651.6	605.5	1.44332	1.08958	1.13712	0.924419	1.31965	1.25677	3	3
comp2208474_c0_seq1|m.14351	7	279.2	1026.1	885	192.5	723.5	682.6	186	760.6	731.3	204.6	608.1	657.5	151.8	543.3	549.1	184.6	681.3	664.1	730.1	532.867	559.3	490.067	414.733	510	1.44253	1.03322	1.12944	0.899755	0.839938	1.05855	3	3
comp2265431_c0_seq1|m.60361	4	782.7	711.8	694.4	848.7	756.4	743.7	770.2	697.2	697.7	834.3	785.2	730.4	823.1	778.4	696.1	782.3	704.8	672.6	729.633	782.933	721.7	783.3	765.867	719.9	1.44161	1.5181	1.45739	1.43813	1.55107	1.49421	3	3
comp2274144_c0_seq9|m.76955	6	858.4	337.9	991.8	910.6	395.3	1009.7	924.9	363	1047.3	972.5	374.2	1177.9	985.6	376.7	1183.1	933.8	379	1081.1	729.367	771.867	778.4	841.533	848.467	797.967	1.44108	1.49664	1.57189	1.54504	1.71836	1.65625	3	3
comp2271319_c0_seq2|m.70822	7	918.9	523.3	743.2	881.2	480.9	838.5	860.2	456.8	743	950.6	477.1	633.9	852.5	500	668.3	852	452.1	754.7	728.467	733.533	686.667	687.2	673.6	686.267	1.4393	1.42231	1.38665	1.26169	1.36421	1.42441	3	3
comp2275822_c0_seq10|m.80745	6	819.3	707.2	657.8	809.6	700.1	596.9	825	696	647.3	1057.7	898.2	682.5	993.1	825.1	649.7	885	737	627.4	728.1	702.2	722.767	879.467	822.633	749.8	1.43858	1.36156	1.45954	1.61469	1.66604	1.55627	3	3
comp1194290_c0_seq1|m.781	4	630	776.3	769.6	573.3	738.4	793.5	494	644.2	675.9	631.3	705.3	551.7	555.7	640.7	496	669.2	750.6	680.8	725.3	701.733	604.7	629.433	564.133	700.2	1.43305	1.36065	1.22112	1.15563	1.14251	1.45333	3	3
comp2263803_c0_seq1|m.57914	10	629.2	1077.9	466.5	564.9	1013.5	449.6	537.2	961.3	429.8	514	1085.4	478.2	540.5	997.3	456.6	635.2	1106	476.7	724.533	676	642.767	692.533	664.8	739.3	1.43153	1.31075	1.29799	1.27148	1.34638	1.53448	3	3
comp2267975_c1_seq1|m.64778	4	537.7	416.7	1218	582.8	462.2	1287	530.6	426	1232.7	555.8	425.2	1266.5	508.5	427	1202	510.1	419.8	1153.7	724.133	777.333	729.767	749.167	712.5	694.533	1.43074	1.50724	1.47368	1.37546	1.44299	1.44156	3	3
comp2253077_c0_seq1|m.42045	13	762.5	1188.4	217.8	861.1	1366.7	267.1	778.1	1221.9	233.1	852	1386.1	271.9	826.7	1332.5	257.3	789.9	1279.2	259.3	722.9	831.633	744.367	836.667	805.5	776.133	1.4283	1.61253	1.50316	1.53611	1.63134	1.61093	3	3
comp2261355_c0_seq1|m.54106	10	507.4	625.2	1034.3	507.4	621.8	1046.9	540.3	612.1	1089.4	619.7	749.2	1351.9	640.2	782.3	1314.3	630.9	792.2	1324.9	722.3	725.367	747.267	906.933	912.267	916	1.42712	1.40648	1.50902	1.66512	1.84757	1.90124	3	3
comp2276377_c0_seq2|m.82218	7	778.8	565.5	818	729.4	526.4	817.9	673.1	480.5	765.9	697.4	471.8	739.5	614.6	433.1	673.5	605.3	460.4	718.9	720.767	691.233	639.833	636.233	573.733	594.867	1.42409	1.34029	1.29207	1.16812	1.16195	1.2347	3	3
comp2259538_c0_seq1|m.51211	4	523	335.2	1303.2	498.4	301.3	1192.4	493.6	313.8	1155.9	572.8	361.9	1356.9	441.2	316.4	1126.8	469.6	304.1	1115.2	720.467	664.033	654.433	763.867	628.133	629.633	1.4235	1.28755	1.32155	1.40245	1.27213	1.30686	3	3
comp2267105_c0_seq1|m.63196	4	647	665.2	847.9	646	650.5	864.1	567.2	576.7	762.9	581	614.6	805.1	546.8	566.5	750.1	568.7	571.5	767.6	720.033	720.2	635.6	666.9	621.133	635.933	1.42264	1.39646	1.28352	1.22442	1.25795	1.31993	3	3
comp2268086_c0_seq1|m.64983	1	718.1			732.4			600.4			698.9			647.9			684.6			718.1	732.4	600.4	698.9	647.9	684.6	1.41882	1.42011	1.21244	1.28317	1.31216	1.42095	2	1
comp2272872_c0_seq27|m.74157	4	498.4	934.5	717.5	559.4	1043.4	778.4	511.4	942.8	739.6	494.2	905.5	713	480.7	875.7	691.9	473.2	888.9	705.4	716.8	793.733	731.267	704.233	682.767	689.167	1.41625	1.53904	1.47671	1.29296	1.38277	1.43042	3	3
comp2276719_c0_seq5|m.83124	4	723.1	753.8	672.7	706.9	759.6	652.5	669	698.9	619.8	622.1	681.3	639.2	544.1	650	614.8	581.2	619	579.3	716.533	706.333	662.567	647.533	602.967	593.167	1.41572	1.36957	1.33798	1.18886	1.22116	1.23117	3	3
comp2264971_c0_seq5|m.59605	5	774.1	439.2	934.6	848	429.8	982.2	783.8	404.5	934.9	772.2	406	942.5	712.4	361.7	960.1	689.3	379.8	877.8	715.967	753.333	707.733	706.9	678.067	648.967	1.4146	1.4607	1.42919	1.29786	1.37325	1.34699	3	3
comp2273039_c1_seq1|m.74523	4		732.8	699		845.5	726		804.6	698.3		862.3	736.4		767	708.5		736.7	634.4	715.9	785.75	751.45	799.35	737.75	685.55	1.41447	1.52356	1.51747	1.46759	1.49413	1.42292	2	2
comp2275539_c0_seq15|m.80077	3	713			666.6			684.2			813			732.6			646			713	666.6	684.2	813	732.6	646	1.40874	1.29253	1.38166	1.49266	1.4837	1.34083	3	1
comp2271649_c0_seq1|m.71599	7	715	615.9	806.5	680	577.6	740.2	642.3	558.3	761.9	689.5	636.4	849.5	647.2	582.1	790.9	659.3	600.4	743.7	712.467	665.933	654.167	725.133	673.4	667.8	1.40769	1.29124	1.32102	1.33133	1.3638	1.38608	3	3
comp2276831_c1_seq2|m.83457	5	709.7			886			895.6			855.2			763.8			696.9			709.7	886	895.6	855.2	763.8	696.9	1.40222	1.71794	1.80856	1.57013	1.54688	1.44648	3	1
comp2268477_c0_seq2|m.65672	5	430.3	854.2	844.4	450.7	824.2	812.9	411.1	811.4	778.2	453.3	995.9	897.5	405.9	765.9	808.5	441.8	842.9	786.1	709.633	695.933	666.9	782.233	660.1	690.267	1.40209	1.34941	1.34673	1.43617	1.33687	1.43271	3	3
comp2279445_c0_seq1|m.91120	7	807.1		609.7	934.6		690.9	840.9		608.8	1083.8		883.2	970.9		772.5	944.6		699.1	708.4	812.75	724.85	983.5	871.7	821.85	1.39965	1.57591	1.46375	1.80569	1.76541	1.70582	3	2
comp2254521_c0_seq3|m.44061	4	913.2	195.2	1014.9	950	213.4	1035.5	837	184.4	905.8	870.5	194.2	908.6	819.3	169.8	851.8	782.1	153.2	818.9	707.767	732.967	642.4	657.767	613.633	584.733	1.3984	1.42121	1.29725	1.20765	1.24276	1.21366	3	3
comp2271137_c0_seq1|m.70473	6	1007.3	492.5	620.6	1080.1	619.6	662.6	957.4	534.1	573.7	950.4	528.8	585.4	879.4	500.3	548.9	907.3	499	547.1	706.8	787.433	688.4	688.2	642.867	651.133	1.39649	1.52682	1.39015	1.26353	1.30196	1.35148	3	3
comp2266005_c0_seq5|m.61322	4	776.1	814.5	522.3	864.3	932.1	614.8	818.6	810.4	576.4	1001.5	1035.1	725.9	908.2	1022	671.3	873.3	974.4	621.7	704.3	803.733	735.133	920.833	867.167	823.133	1.39155	1.55843	1.48452	1.69064	1.75623	1.70848	3	3
comp2269297_c0_seq2|m.67181	4	661.3	658.6	791.2	761.1	723	785.6	705.7	671.2	759.7	610.8	618.4	679.9	593.2	591.3	660.2	585.7	577.6	615.9	703.7	756.567	712.2	636.367	614.9	593.067	1.39037	1.46697	1.43821	1.16836	1.24533	1.23096	3	3
comp2266841_c0_seq1|m.62766	6	360.9	1097.9	647.1	333.4	1063.9	604.4	390.6	1127.7	696.7	404.4	1316.6	809	456.7	1374.2	818.6	399	1181.7	691.3	701.967	667.233	738.333	843.333	883.167	757.333	1.38694	1.29376	1.49098	1.54835	1.78863	1.57191	3	3
comp2247533_c0_seq1|m.35721	9	511.8	838.6	750.7	675.4	1006	951	519.9	777.3	723.5	515.7	743.8	721.7	491.5	730.9	685.6	568	819.1	764.9	700.367	877.467	673.567	660.4	636	717.333	1.38378	1.7014	1.36019	1.21248	1.28806	1.48889	3	3
comp2266455_c0_seq1|m.62051	4	358.4	932.3	810.3	393.5	872.3	752.1	399	845.7	735.3	399.6	903.5	753.4	406	857.5	746.5	388.2	767.4	687.2	700.333	672.633	660	685.5	670	614.267	1.38372	1.30423	1.33279	1.25857	1.35692	1.27496	3	3
comp2277114_c1_seq1|m.84278	7	1097.1	618.2	382.1	1031.9	680.4	388.5	1228.2	735.8	442.1	1615.1	906.4	655.6	1372.4	801.9	474	1138.8	678.3	376.6	699.133	700.267	802.033	1059.03	882.767	731.233	1.38135	1.35781	1.61961	1.94437	1.78782	1.51774	3	3
comp2274537_c0_seq28|m.77857	8	616.5	598.3	881.4	626.4	635.2	923.6	566.4	577.8	858.5	609.5	666.9	986	564.2	558.7	850.6	575	555.3	883.4	698.733	728.4	667.567	754.133	657.833	671.233	1.38055	1.41236	1.34807	1.38458	1.33228	1.3932	3	3
comp2275733_c0_seq7|m.80500	6	813.4	681.1	597.9	668.2	612.9	489.6	590.5	520.3	401	803.8	759.2	602.5	702.6	645.8	503.6	746.7	713.6	562.3	697.467	590.233	503.933	721.833	617.333	674.2	1.37805	1.14445	1.01764	1.32528	1.25025	1.39936	3	3
comp2274246_c0_seq1|m.77191	3	277.3	860.8	954	279.9	768.9	883.7	291	819	929.2	316.7	841.6	993.9	283.4	794.9	903	275.2	782.8	912.9	697.367	644.167	679.733	717.4	660.433	656.967	1.37785	1.24903	1.37264	1.31714	1.33754	1.36359	3	3
comp2275859_c0_seq2|m.80836	13	774.9	702.9	613.5	806.7	720.7	589.6	823.9	698	572	1044	969.2	802.5	882.9	747.4	664.8	793.4	721.7	647.4	697.1	705.667	697.967	938.567	765.033	720.833	1.37733	1.36828	1.40946	1.72319	1.54938	1.49615	3	3
comp2276806_c0_seq3|m.83381	8	779.7	634.8	671.9	855.4	671.6	703	782.3	619.4	657	880.2	689.8	762.5	794.8	634	703.2	814.7	623.4	676.6	695.467	743.333	686.233	777.5	710.667	704.9	1.3741	1.44131	1.38577	1.42748	1.43928	1.46308	3	3
comp2275218_c0_seq1|m.79334	9	910.7	466.5	704.5	956.6	496.6	758.5	874.7	453.5	693.6	1084.4	550.7	833.6	977.7	494.8	779.9	957.2	473.8	755.5	693.9	737.233	673.933	822.9	750.8	728.833	1.37101	1.42949	1.36093	1.51083	1.52056	1.51276	3	3
comp2254346_c0_seq1|m.43876	4	683.2	694.6		600.7	543		684.6	725.3		677.1	703.8		688.5	694.9		586.1	614.6		688.9	571.85	704.95	690.45	691.7	600.35	1.36113	1.10881	1.42357	1.26766	1.40086	1.24608	3	2
comp2272782_c0_seq2|m.73955	7	530.5	799	735.2	472.9	857.6	696	475.5	774.7	662.2	558.1	823.4	742.4	479.6	735.5	654.5	472.5	795.4	651.4	688.233	675.5	637.467	707.967	623.2	639.767	1.35981	1.30979	1.28729	1.29982	1.26213	1.32789	3	3
comp2263534_c0_seq1|m.57439	5	742.8	1047.2	274.2	852.6	1190.8	322	801.5	1115	300.5	889.1	1356.8	369.1	809.8	1234.2	351	842.6	1206.1	309.2	688.067	788.467	739	871.667	798.333	785.967	1.35948	1.52883	1.49233	1.60037	1.61682	1.63134	3	3
comp2261150_c0_seq1|m.53829	6	580.4	518	959.8	588.4	542.7	949.5	579.1	524.9	944.1	648.5	594.2	1006.8	573.9	536.1	947	544.9	503.7	894.2	686.067	693.533	682.7	749.833	685.667	647.6	1.35553	1.34475	1.37863	1.37668	1.38865	1.34415	3	3
comp2271871_c0_seq8|m.72023	8	763.1	187.1	1104	886.9	213	1244.1	888.3	209.1	1212.1	924.3	211.7	1327.2	858.3	200	1192.5	767.8	189.4	1065.2	684.733	781.333	769.833	821.067	750.267	674.133	1.35289	1.51499	1.55459	1.50747	1.51948	1.39922	3	3
comp2279734_c0_seq1|m.91168	3	1014.1	796.6	239.1	1075.2	855.7	273.9	1070.7	829	264.2	1127.1	935.2	236	1031.9	835.8	222.9	1055.2	812	258.2	683.267	734.933	721.3	766.1	696.867	708.467	1.35	1.42503	1.45658	1.40655	1.41133	1.47048	3	3
Pdu_trscr_assembly_1|1986;|m.5698	8	547.5	698.7	801.6	404.8	559.9	739	373.8	524.2	728.5	408.4	567.9	884.6	380	547.2	756.3	364	541	717.4	682.6	567.9	542.167	620.3	561.167	540.8	1.34868	1.10115	1.09484	1.13886	1.1365	1.12248	3	3
comp2266254_c0_seq1|m.61707	3	1021	560.6	464.4	919.5	474.5	431.4	860.8	473.6	382.4	657.1	365	301.3	718.7	396.9	297.7	647.8	334.8	280.1	682	608.467	572.267	441.133	471.1	420.9	1.34749	1.17981	1.15563	0.809914	0.954094	0.873614	3	3
comp2232113_c0_seq1|m.23538	12	863.9	255.5	919.6	906.3	233.1	930.9	871.2	239.1	994	880.6	256.6	1049.7	884.6	282.7	1101.6	851.5	251.5	920.9	679.667	690.1	701.433	728.967	756.3	674.633	1.34288	1.33809	1.41646	1.33837	1.5317	1.40026	3	3
comp2256866_c0_seq1|m.47132	5	517	733.9	781.7	519.6	725.7	823.2	498.2	699.8	784.7	509.6	706.5	801.2	482.7	657.1	765.3	483.5	675.5	773.1	677.533	689.5	660.9	672.433	635.033	644.033	1.33867	1.33693	1.33461	1.23458	1.2861	1.33675	3	3
comp2264037_c0_seq2|m.58331	5	735	756.2	537.5	698.1	693.3	489.9	703.5	664.1	506	777.5	721.8	553.8	833.2	772.7	553.4	694.6	686.8	489.8	676.233	627.1	624.533	684.367	719.767	623.733	1.3361	1.21594	1.26117	1.25649	1.45771	1.29461	3	3
comp2271431_c0_seq28|m.71041	2	521.5	665	841.1	613.3	837.7	1011.6	519.3	684.5	851.5	562.3	792.4	977.4	520.3	709.5	895.5	537.6	704.9	909.3	675.867	820.867	685.1	777.367	708.433	717.267	1.33537	1.59165	1.38348	1.42723	1.43475	1.48875	3	3
comp2268917_c1_seq1|m.66432	6	316.9	1040.8	663.6	264.5	898	610.4	249.6	880.2	579.6	222.4	1027.9	564.7	215.8	852.4	522.9	225.7	806.7	546.8	673.767	590.967	569.8	605	530.367	526.4	1.33123	1.14588	1.15065	1.11077	1.07412	1.09259	3	3
comp2277654_c0_seq4|m.85982	11	633.6	552.5	834.5	575.8	577.7	872.8	602.2	519.5	772.6	646.7	567.7	814	578.1	505.9	740.2	609.9	527.2	813.6	673.533	675.433	631.433	676.133	608.067	650.233	1.33076	1.30966	1.27511	1.24137	1.23149	1.34962	3	3
comp2276350_c0_seq10|m.82165	7	709		637.3	759.9		728.8	712.3		725.7	964.3		945	705.4		653.1	672		631	673.15	744.35	719	954.65	679.25	651.5	1.33001	1.44328	1.45194	1.75272	1.37565	1.35224	3	2
comp2264776_c0_seq6|m.59334	12	586.3	808.8	618.8	577.6	777.2	596.6	515.1	729.5	538.1	474.9	720	536.4	466.1	707.5	501.8	514.8	727.4	545.2	671.3	650.467	594.233	577.1	558.467	595.8	1.32635	1.26125	1.19999	1.05955	1.13103	1.23663	3	3
comp2271753_c0_seq2|m.71801	3	669.7			690.7			617.8			647.2			634.1			648			669.7	690.7	617.8	647.2	634.1	648	1.32319	1.33926	1.24758	1.18825	1.28421	1.34498	3	1
comp1198575_c0_seq1|m.1066	6	558.3	449.5	1001.1	631.7	505.3	1099.7	494.5	364.8	925.2	463.7	340.7	905.9	482.7	303.9	835.1	523.4	385.8	897.7	669.633	745.567	594.833	570.1	540.567	602.3	1.32306	1.44564	1.2012	1.0467	1.09478	1.25013	3	3
comp2274888_c0_seq2|m.78557	15	949.5	190.7	862	955.7	197.4	768.8	1004	198.4	824.9	1351	346.5	1116.1	1221.7	255	1037.7	1091	219.3	899.6	667.4	640.633	675.767	937.867	838.133	736.633	1.31865	1.24218	1.36463	1.72191	1.69743	1.52895	3	3
comp2260595_c0_seq1|m.52722	8	251.4	475.3	1275.4	295.2	525.4	1298.4	257.2	476.9	1211.1	256.9	473.3	1377	261.9	462.4	1281.1	252.2	476.1	1222.7	667.367	706.333	648.4	702.4	668.467	650.333	1.31858	1.36957	1.30937	1.2896	1.35381	1.34982	3	3
comp1196959_c0_seq2|m.1014	12		607.1	727.6		626	624.8		718.2	656.3		793.6	747		779.7	697.9		659.4	609	667.35	625.4	687.25	770.3	738.8	634.2	1.31855	1.21264	1.38782	1.41426	1.49625	1.31634	3	2
comp2253903_c0_seq1|m.43299	8	283.3	660.6	1048.2	243.4	549.8	862.5	193.6	451.9	679.9	229.6	503.9	702.2	217.2	481.5	683.1	210	436.1	639.5	664.033	551.9	441.8	478.567	460.6	428.533	1.31199	1.07013	0.892165	0.878641	0.932829	0.889458	3	3
comp2269773_c0_seq6|m.68002	6	521.1	559.1	907.5	565.8	459.8	830.7	524.9	452.1	839.2	598.8	574.3	1004.1	567	493.7	946.1	493.6	454.9	811.2	662.567	618.767	605.4	725.733	668.933	586.567	1.3091	1.19978	1.22254	1.33244	1.35476	1.21747	3	3
comp2269321_c1_seq1|m.67212	6	753.6	807.8	421.9	713.3	760.7	409.7	665.8	730.5	401.6	689.2	719.9	388.8	574.7	593.6	315	709.6	757.9	389.1	661.1	627.9	599.3	599.3	494.433	618.867	1.3062	1.21749	1.21022	1.10031	1.00135	1.28451	3	3
comp2275977_c0_seq4|m.81156	8	660.1			649.8			666.7			958.1			752			666.1			660.1	649.8	666.7	958.1	752	666.1	1.30422	1.25995	1.34632	1.75906	1.52299	1.38255	3	1
comp2221095_c0_seq1|m.18558	3	816.7	584.8	577.7	905	620	618.3	779.6	534.9	552.1	614.7	486.4	481.4	770.6	405.5	426.9	647.4	428.1	442.1	659.733	714.433	622.2	527.5	534.333	505.867	1.3035	1.38528	1.25646	0.968482	1.08216	1.04997	3	3
comp2276747_c1_seq2|m.83192	5	631.6	810.1	534.5	668.8	934.6	539.9	661.6	825.1	532.4	694.6	837.2	585.2	605.1	800.4	514.1	609.2	812.6	506.1	658.733	714.433	673.033	705.667	639.867	642.633	1.30152	1.38528	1.35911	1.29559	1.29589	1.33384	3	3
comp2262897_c0_seq4|m.56497	4	486	875.4	603.4	491.8	922.4	636.9	453.5	867	630.6	572.1	910.3	670.6	494	945.4	664.7	477	902.5	630.6	654.933	683.7	650.367	717.667	701.367	670.033	1.29401	1.32569	1.31334	1.31763	1.42044	1.39071	3	3
comp2254601_c0_seq2|m.44156	4	837.1	469.6		700.3	418.2		730.6	422.5		989.7	612.9		875.7	545.4		812.6	479.3		653.35	559.25	576.55	801.3	710.55	645.95	1.29089	1.08438	1.16428	1.47118	1.43904	1.34072	3	2
comp2278474_c0_seq1|m.89294	8	787.9	501.5	670.6	872	516.9	713.5	767.9	489.4	647.9	799.4	607.6	779.5	633.6	516.8	662.5	676.3	471.9	677	653.333	700.8	635.067	728.833	604.3	608.4	1.29085	1.35884	1.28244	1.33813	1.22386	1.26279	3	3
comp2072973_c0_seq1|m.5296	5	184.9	773.7	1000.4	221.5	1005.4	1223.9	197.6	781.1	995.6	182.1	684.5	982.3	233.6	702	1014	221.5	737.9	1006	653	816.933	658.1	616.3	649.867	655.133	1.2902	1.58402	1.32896	1.13152	1.31614	1.35979	3	3
comp2277296_c0_seq1|m.84800	8	648.8	621.1	688.9	761.1	614.6	814.6	626.3	581.2	639	597.1	726.4	606.1	551.1	585	587.1	615.9	588.7	678	652.933	730.1	615.5	643.2	574.4	627.533	1.29006	1.41565	1.24293	1.18091	1.1633	1.3025	3	3
comp2263347_c0_seq2|m.57195	7	1158	585.3	211.9	1226.9	666.3	203	1154.5	623.2	192.6	1449.1	623.8	208.6	1291.9	627.1	178.8	1206.2	629.2	219.4	651.733	698.733	656.767	760.5	699.267	684.933	1.28769	1.35483	1.32627	1.39627	1.41619	1.42164	3	3
comp2272961_c0_seq1|m.74370	3	740.6	426	785.6	809	456.7	844.7	730.7	424.1	768	753.3	416.9	800.6	701.5	424.5	746.8	713.2	427.4	748.8	650.733	703.467	640.933	656.933	624.267	629.8	1.28572	1.36401	1.29429	1.20612	1.26429	1.3072	3	3
comp2257905_c0_seq1|m.48664	3	658.9	675.3	617	647.1	660.7	560.1	615.7	578	548.6	665.3	663.2	606.6	537.5	528.5	509.7	565.3	539.2	499.8	650.4	622.633	580.767	645.033	525.233	534.767	1.28506	1.20728	1.17279	1.18427	1.06373	1.10995	3	3
comp2211270_c0_seq1|m.14951	6	628.3	748.8	572.1	676.9	805.7	633.8	675.9	802.2	605.8	783.4	917	614.5	640.6	755.4	549.3	569.1	706.1	543.8	649.733	705.467	694.633	771.633	648.433	606.333	1.28374	1.36789	1.40273	1.41671	1.31324	1.2585	3	3
comp2259705_c0_seq1|m.51415	3	621.2	881.5	437.8	606.5	906.5	452.1	563.1	849	397.7	623.7	904.8	423.8	567.5	844.4	402.1	542.2	808.1	402.9	646.833	655.033	603.267	650.767	604.667	584.4	1.27801	1.2701	1.21823	1.1948	1.2246	1.21297	3	3
comp1935108_c0_seq1|m.3268	4		770.5	522.9		769.4	497.1		676.6	437.5		806	539.4		731.5	512.1		692.8	485.6	646.7	633.25	557.05	672.7	621.8	589.2	1.27775	1.22786	1.1249	1.23507	1.2593	1.22294	2	2
comp2268336_c1_seq1|m.65474	5	1311.1	467.4	153.5	1049	333.4	129.6	1063.4	367.7	129.9	947.8	336	102.2	920.9	355.9	119.8	940.4	339.4	116.7	644	504	520.333	462	465.533	465.5	1.27241	0.977249	1.05075	0.848225	0.94282	0.966185	3	3
comp2271906_c0_seq1|m.72107	2	1082.4	588.9	259.9	1168.6	673.1	282.4	1158.8	620.3	272.8	1203.8	690	293.4	1259.2	701.4	289.6	1255	695.8	294.8	643.733	708.033	683.967	729.067	750.067	748.533	1.27189	1.37287	1.38119	1.33856	1.51907	1.55365	3	3
comp1971911_c0_seq1|m.3786	9	731.4	545.6	640.9	863.6	644	702.4	778.5	610.5	665.5	861.9	616.4	706.9	839.9	634	741.9	829.1	622.6	694.2	639.3	736.667	684.833	728.4	738.6	715.3	1.26313	1.42839	1.38294	1.33733	1.49585	1.48467	3	3
comp2262281_c0_seq3|m.55504	5	540	738.4		492	569.9		535.9	723.5		621.2	872.2		581.6	878		525.2	766.4		639.2	530.95	629.7	746.7	729.8	645.8	1.26293	1.0295	1.27161	1.37093	1.47803	1.34041	3	2
comp2261102_c1_seq3|m.53741	6	607.7	547.1	762.7	623.2	549.3	817.7	616.6	553.2	786.7	652.7	684	913.5	566.4	542.5	743.4	604	527.9	753.7	639.167	663.4	652.167	750.067	617.433	628.533	1.26286	1.28632	1.31698	1.37711	1.25046	1.30457	3	3
comp2141997_c0_seq1|m.7386	4	951.1	606.1	358.6	669.2	385.2	211.5	960.3	539.2	327.3	1224.1	954.6	547.8	1151	770.8	468.4	930.2	526.4	315	638.6	421.967	608.933	908.833	796.733	590.533	1.26174	0.818188	1.22967	1.6686	1.61358	1.2257	3	3
comp2277995_c0_seq1|m.87177	7	638.6			599.1			611.9			666			585.1			534.4			638.6	599.1	611.9	666	585.1	534.4	1.26174	1.16165	1.23566	1.22277	1.18497	1.10919	3	1
comp2270662_c0_seq3|m.69605	9	675.1	352.9	887.4	788.5	441	1041.3	762.2	371.9	962.9	781	419.5	965.9	795.2	400	1001.4	748.8	380.7	904.6	638.467	756.933	699	722.133	732.2	678.033	1.26148	1.46768	1.41155	1.32583	1.48289	1.40732	3	3
comp2254447_c0_seq1|m.43978	6	789.9	561.8	559.7	904	633.8	639.5	793.2	580.7	586.6	874.5	615.4	638.5	878	640.8	647.2	854.8	593.8	606.6	637.133	725.767	653.5	709.467	722	685.067	1.25885	1.40725	1.31967	1.30257	1.46223	1.42191	3	3
comp2271713_c0_seq1|m.71735	6	659.6	595.5	652.6	586.1	530.5	584.3	537.1	503.5	514.4	580.1	526.9	541.5	531.2	473.8	525.9	521.7	479.7	491.8	635.9	566.967	518.333	549.5	510.3	497.733	1.25641	1.09934	1.04672	1.00887	1.03348	1.03309	3	3
comp2248254_c1_seq2|m.36433	3	749.8	578.3	579.1	808.9	623.8	618.3	803.6	608.3	593	926.7	673.8	616	787.1	602.7	576.4	731.5	552.9	556.5	635.733	683.667	668.3	738.833	655.4	613.633	1.25608	1.32562	1.34956	1.35649	1.32735	1.27365	3	3
comp2243720_c0_seq2|m.32014	4	560.2	565.6	781.1	598.7	599.6	918.5	593.7	598.8	804.7	649.2	642.9	715.8	541.9	519.7	635.7	524.2	525.8	708.5	635.633	705.6	665.733	669.3	565.767	586.167	1.25588	1.36815	1.34437	1.22882	1.14582	1.21664	3	3
comp2266755_c0_seq1|m.62616	6	432.3	987.3	487	489.7	1134.9	562.3	432.5	1004.5	496.9	473.7	980.4	552.6	452.7	1010.4	517.6	446	968.2	505.5	635.533	728.967	644.633	668.9	660.233	639.9	1.25568	1.41346	1.30176	1.22809	1.33714	1.32817	3	3
comp2239935_c0_seq1|m.28757	4	590.8	575.8	739.8	585.6	592.6	759	606.4	587.9	744.4	684.7	681.5	863	638.2	631.1	787.8	621	625.6	769.7	635.467	645.733	646.233	743.067	685.7	672.1	1.25555	1.25207	1.30499	1.36426	1.38871	1.395	3	3
comp2270576_c0_seq1|m.69463	5	763.4	429.7	710.7	834.4	476.5	742	802.8	430.3	774.3	790.8	489.7	724.4	819.7	458.1	750.2	832.3	424.9	762	634.6	684.3	669.133	668.3	676	673.067	1.25384	1.32685	1.35124	1.22699	1.36907	1.39701	3	3
comp2278117_c0_seq10|m.87638	7	259.5	860	778.7	317.8	1001.2	910	290.8	932	846.2	244.6	889.4	797.6	256.2	878.2	822.9	273.4	847.5	777.2	632.733	743	689.667	643.867	652.433	632.7	1.25015	1.44067	1.3927	1.18213	1.32134	1.31322	3	3
comp2259017_c0_seq2|m.50441	4	628.1	602.8	665.3	498.6	474.3	549.7	510.2	464.9	525.2	583.5	567.8	612.3	487.3	457	520.1	485.4	471.1	505.6	632.067	507.533	500.1	587.867	488.133	487.367	1.24884	0.9841	1.00989	1.07931	0.988591	1.01157	3	3
comp2065624_c0_seq3|m.5172	5	222.9	500.4	1170.1	209.5	469	1084	196.6	486.4	1188.9	218.8	532	1186.5	178.1	486.5	1178.9	201	480.5	1156.6	631.133	587.5	623.967	645.767	614.5	612.7	1.24699	1.13915	1.26003	1.18562	1.24451	1.27171	3	3
comp2205714_c0_seq1|m.13884	3	520.2	994	376.6	441.2	855.1	357.1	412.3	844.7	325	439.2	907.6	322.3	421.8	877.3	339.2	433.8	852.1	335.7	630.267	551.133	527.333	556.367	546.1	540.533	1.24528	1.06864	1.06489	1.02148	1.10599	1.12192	3	3
comp2269208_c1_seq1|m.67014	4	1106.8	384.9	397.7	1116.3	391.8	420.8	1017.2	363.4	400.3	1137.1	388.8	428.1	1004	363.2	391.7	1083.1	352	391.5	629.8	642.967	593.633	651.333	586.3	608.867	1.24436	1.2467	1.19877	1.19584	1.1874	1.26376	3	3
comp2266326_c0_seq5|m.61861	3	835.5	451.1	601.7	876.8	487.5	639.7	868.9	456.8	579.8	946.8	518.5	643.8	881.8	463.5	585.9	796.1	449.1	572.3	629.433	668	635.167	703.033	643.733	605.833	1.24363	1.29524	1.28265	1.29076	1.30372	1.25746	3	3
comp2254568_c0_seq1|m.44123	7	721.2	344.4	820.4	699.7	316.9	742.6	703.7	296.1	728.5	774.3	278.5	822.7	677	285.8	715.9	709.3	267.5	692.2	628.667	586.4	576.1	625.167	559.567	556.333	1.24212	1.13702	1.16337	1.1478	1.13326	1.15472	3	3
comp2253217_c0_seq2|m.42336	3	435.1	489	959.7	319.8	408.2	754.8	363.8	422.7	813.8	394.9	443.7	935.5	297.2	359.3	699	313.9	367.4	736.5	627.933	494.267	533.433	591.367	451.833	472.6	1.24067	0.958376	1.07721	1.08574	0.915075	0.980922	3	3
comp2277289_c0_seq1|m.84785	7	1048.4	650.8	184.2	993.8	548.8	170.5	951.5	544.7	146.5	995.2	555	132.3	917.8	522.7	147.8	946.4	532.4	148	627.8	571.033	547.567	560.833	529.433	542.267	1.24041	1.10723	1.10575	1.02968	1.07223	1.12552	3	3
comp2257781_c0_seq1|m.48513	9	1103.9	470.3	309	1248.4	484.9	343.1	1236.2	498.4	333.9	2077.9	615.4	345	1217.8	498.7	302.7	1161.5	460.3	318.8	627.733	692.133	689.5	1012.77	673.067	646.867	1.24027	1.34204	1.39237	1.85942	1.36313	1.34263	3	3
Pdu_trscr_assembly_1|1453;|m.85764	9	683.5	422.5	774.4	595.4	382.4	757.8	592.8	368.3	734.5	593	349.9	771.9	610.3	354.3	771.4	560.6	349.1	714.3	626.8	578.533	565.2	571.6	578.667	541.333	1.23843	1.12177	1.14136	1.04945	1.17194	1.12358	3	3
comp2258103_c0_seq1|m.48930	1		626.2			607.9			617.7			628.2			559.3			577.1		626.2	607.9	617.7	628.2	559.3	577.1	1.23724	1.17871	1.24737	1.15337	1.13272	1.19782	2	1
comp2008211_c0_seq1|m.4323	1		624.8			582.2			633.1			589.4			548.9			568.7		624.8	582.2	633.1	589.4	548.9	568.7	1.23448	1.12888	1.27847	1.08213	1.11166	1.18039	3	1
comp2210528_c0_seq1|m.14754	4	363.5	482	1025.6	436.4	563.8	1188.9	370.6	502.8	1106.8	186	243.2	674.4	222.1	274.6	682.4	289.1	361.1	805.3	623.7	729.7	660.067	367.867	393.033	485.167	1.2323	1.41488	1.33293	0.675398	0.79599	1.00701	3	3
comp2274746_c0_seq5|m.78255	5			623.3			625.1			595.2			746			706.9			647	623.3	625.1	595.2	746	706.9	647	1.23151	1.21206	1.20194	1.36965	1.43165	1.3429	3	1
comp2240351_c0_seq2|m.29053	2		537.2	707.9		469	665.7		491.4	631.7		523.4	675.6		429.4	589.8		425.9	570.6	622.55	567.35	561.55	599.5	509.6	498.25	1.23003	1.10008	1.13399	1.10067	1.03207	1.03416	3	2
comp2264114_c0_seq1|m.58449	4	373.7	807.9	682.8	348.7	796.4	641.1	361.5	827	695.8	354.9	869.2	754.7	375.4	862.6	744.7	347.2	803.3	658.8	621.467	595.4	628.1	659.6	660.9	603.1	1.22789	1.15447	1.26838	1.21102	1.33849	1.25179	3	3
comp2270620_c0_seq1|m.69543	4	752.3		489.5	765.7		507.3	753.8		481.4	822.5		532.8	714.8		462.4	693.5		457.7	620.9	636.5	617.6	677.65	588.6	575.6	1.22677	1.23416	1.24717	1.24416	1.19206	1.19471	3	2
comp2261334_c1_seq1|m.54085	6	532.3	744.3	582.9	612.6	863.5	648.4	534.8	762.9	585.4	600.1	876.6	687.7	578.3	802.1	659.6	549	790.1	601.4	619.833	708.167	627.7	721.467	680	646.833	1.22466	1.37313	1.26757	1.3246	1.37717	1.34256	3	3
comp2271854_c0_seq8|m.71996	5	234.9	609.2	1015.3	241	586.6	1067.5	252.2	570.5	1001.8	247.6	584.5	1011.3	228.9	536.1	899.4	236.3	527.6	932.6	619.8	631.7	608.167	614.467	554.8	565.5	1.2246	1.22486	1.22812	1.12815	1.12361	1.17374	3	3
comp2277729_c0_seq10|m.86207	6	325.9	168.6	1363	248	113.7	986.7	289.6	126.4	1114.4	345.5	115.7	1253.2	310.1	145	1196.3	262.9	133.2	1083.4	619.167	449.467	510.133	571.467	550.467	493.167	1.22335	0.87151	1.03016	1.0492	1.11483	1.02361	3	3
comp2273961_c0_seq3|m.76514	4	657.9	580.3	614.7	396.7	382.5	532	511.6	470.9	553.8	607.2	540.1	713.9	376.7	354	578.4	379.5	363.8	587.5	617.633	437.067	512.1	620.4	436.367	443.6	1.22032	0.847466	1.03413	1.13905	0.883751	0.92073	3	3
comp2261121_c0_seq1|m.53764	5	702.7	821.4	328.1	698.7	825.1	376.4	642.5	781.4	319.1	623.3	751.4	258.9	607.2	786.9	329.9	598.1	773.4	335	617.4	633.4	581	544.533	574.667	568.833	1.21986	1.22815	1.17326	0.999755	1.16384	1.18066	3	3
comp2273911_c0_seq8|m.76361	6	743.6	871.8	231.4	867	1004.8	277.2	791.2	909.2	231	861.9	955.2	225.3	775	864.9	202.1	741.2	846.5	226.4	615.6	716.333	643.8	680.8	614	604.7	1.2163	1.38896	1.30008	1.24994	1.2435	1.25511	3	3
comp2275272_c0_seq4|m.79426	2	593.4	636.6		588.3	615.5		558.2	612.7		580.7	595.3		537.6	588.2		555.7	613.9		615	601.9	585.45	588	562.9	584.8	1.21511	1.16708	1.18225	1.07956	1.14001	1.2138	3	2
comp2277814_c0_seq4|m.86531	3	389.3	546.2	909.1	386.8	598.4	923.6	332.1	529.7	819.7	349.2	550.7	879.9	278.5	491.9	786.7	308.6	530	816.6	614.867	636.267	560.5	593.267	519.033	551.733	1.21485	1.23371	1.13187	1.08923	1.05117	1.14517	3	3
comp2248410_c0_seq1|m.36564	4	904.5	647.8	291.7	981.6	701.2	342.6	920.9	669	331	1168.2	744.3	303.2	864	607.4	287.3	836.1	619.2	278.5	614.667	675.133	640.3	738.567	586.233	577.933	1.21446	1.30907	1.29301	1.356	1.18727	1.19955	3	3
comp2245073_c0_seq1|m.33194	7	376.2	601.9	863.9	415.9	685.8	971.9	397.8	630.2	863.1	431.5	629	906.3	409.2	663.5	901.5	383.2	619.6	849	614	691.2	630.367	655.6	658.067	617.267	1.21314	1.34023	1.27295	1.20367	1.33275	1.28119	3	3
comp2273625_c0_seq2|m.75724	3	612			616.1			608.4			873.1			567.6			542			612	616.1	608.4	873.1	567.6	542	1.20919	1.19461	1.22859	1.603	1.14953	1.12497	3	1
comp1194409_c0_seq1|m.830	5	574.2	572.3	685.6	528.3	511	635	507	479.4	655.6	591.7	588.7	744.7	499	471.5	645.7	477.8	485.4	636.6	610.7	558.1	547.333	641.7	538.733	533.267	1.20662	1.08215	1.10528	1.17815	1.09107	1.10684	3	3
comp2275427_c0_seq1|m.79810	5	656.4	554.8	613.8	494.1	457.6	500.5	457.8	412.1	460.2	825.7	686.6	786.4	642.3	543.9	614.7	823.1	728.5	768.9	608.333	484.067	443.367	766.233	600.3	773.5	1.20194	0.938599	0.895328	1.40679	1.21576	1.60547	3	3
comp2273122_c0_seq2|m.74682	3	795.2	378	650.3	749.2	342	596.2	694.6	350.6	552.7	592.2	347.4	507.7	567.7	290	433	539.4	257.2	419.2	607.833	562.467	532.633	482.433	430.233	405.267	1.20095	1.09062	1.07559	0.885741	0.871329	0.841166	3	3
comp2234079_c0_seq2|m.24745	6	688.5	564.3	569.5	724	531	608.2	691.6	497.2	594.5	741.9	523.4	680.5	681.8	477.5	639.2	687.9	526.1	599.9	607.433	621.067	594.433	648.6	599.5	604.633	1.20016	1.20424	1.20039	1.19082	1.21414	1.25497	3	3
comp1988763_c0_seq1|m.4041	7	902.5	375	543.7	1047.9	437	662.3	895.2	379.1	549.5	974.2	374.9	585.8	858.9	365.7	547.8	867.9	386.3	565.7	607.067	715.733	607.933	644.967	590.8	606.633	1.19944	1.3878	1.22765	1.18415	1.19652	1.25912	3	3
comp2274262_c0_seq1|m.77231	10	676.1	523.8	620.5	739.8	612.7	661.5	716.3	584.6	682.3	885.9	721.8	884.8	650.7	592.8	660.9	665.2	582	628.3	606.8	671.333	661.067	830.833	634.8	625.167	1.19891	1.30171	1.33495	1.5254	1.28563	1.29759	3	3
comp2252950_c0_seq1|m.41897	11	204.6	857.5	757.4	204.4	912.5	756.3	186.1	831.7	655.6	217.2	903	703.4	189.2	883.7	661.8	210.2	803.1	659.2	606.5	624.4	557.8	607.867	578.233	557.5	1.19832	1.2107	1.12641	1.11603	1.17107	1.15714	3	3
comp2280482_c0_seq1|m.91228	2	159.8	593.2	1061.7	182.1	626.7	1210.5	156.1	482.4	915.9	160.8	414.2	785.1	128.8	367.3	709.7	159.9	440.2	831.6	604.9	673.1	518.133	453.367	401.933	477.233	1.19516	1.30513	1.04631	0.832375	0.814015	0.990539	3	3
comp1917143_c0_seq1|m.2960	4		1057.9	147.4		829	168.1		883.9	146.4		778.2	149.4		788.2	133.8		651.1	133.5	602.65	498.55	515.15	463.8	461	392.3	1.19071	0.966682	1.04029	0.85153	0.933639	0.814252	3	2
comp2276871_c0_seq8|m.83582	5	810.2	451.9	542.4	854.8	467.5	566.9	755.5	397.3	506.5	748	418.6	493.9	714.2	390.8	450.9	799.8	405.3	509.3	601.5	629.733	553.1	553.5	518.633	571.467	1.18844	1.22104	1.11692	1.01622	1.05036	1.18613	3	3
comp2262731_c0_seq1|m.56213	4	620.6	535.8	644.4	670.9	627.5	664.2	651.9	603.7	676.8	731.9	599.3	772.2	694.6	646.6	712.3	641.9	594.2	658.5	600.267	654.2	644.133	701.133	684.5	631.533	1.186	1.26849	1.30075	1.28727	1.38628	1.3108	3	3
comp2272140_c2_seq11|m.72564	3	606.4	287.3	906.7	660.4	346.9	1032.7	581.3	323.8	936.4	609.7	321.2	933.3	612.7	306.5	882.8	557.5	283.3	841.9	600.133	680	613.833	621.4	600.667	560.9	1.18574	1.31851	1.23957	1.14088	1.2165	1.1642	3	3
comp2271145_c0_seq1|m.70494	4	464.4	789.1	544.5	478	812.8	573.7	430.8	753.8	516.8	390.8	769	481.4	364.3	668.9	447.7	381.3	689.9	462.6	599.333	621.5	567.133	547.067	493.633	511.267	1.18416	1.20508	1.14526	1.00441	0.99973	1.06118	3	3
comp2270519_c0_seq1|m.69360	8	443.2	835.5	516.4	522.9	900.1	544.1	450.7	836.3	512.1	427.8	894.4	535.4	446.3	838.6	516.2	417	788.4	485.3	598.367	655.7	599.7	619.2	600.367	563.567	1.18225	1.27139	1.21103	1.13684	1.21589	1.16973	3	3
comp2230020_c0_seq1|m.22415	2			597.7			634			569.2			621.9			570.3			570.9	597.7	634	569.2	621.9	570.3	570.9	1.18093	1.22932	1.14943	1.1418	1.155	1.18495	2	1
comp2225923_c0_seq1|m.20517	4	422.1	772.1		468.1	799.9		346.1	671.5		348	687.1		478.5	823.6		363.2	696.4		597.1	634	508.8	517.55	651.05	529.8	1.17975	1.22932	1.02746	0.950214	1.31854	1.09965	3	2
comp2275548_c0_seq1|m.80102	2	554	640.1		678.4	757.8		541.5	627.8		554	809.3		488.5	575.4		525.7	651.1		597.05	718.1	584.65	681.65	531.95	588.4	1.17965	1.39239	1.18063	1.2515	1.07733	1.22127	3	2
comp1194322_c0_seq2|m.793	6	664.8	778.4	345.7	727.2	876.4	387.9	676.1	827.3	347.4	717.2	845.4	360	793.3	917.5	424	721.4	845.8	392.8	596.3	663.833	616.933	640.867	711.6	653.333	1.17817	1.28716	1.24583	1.17662	1.44117	1.35605	3	3
comp2264636_c0_seq1|m.59154	4	789.2	516.8	481.1	693.7	476.6	455.7	663.3	463	441.6	806.1	568.4	548.3	717.5	506.6	453.5	711.8	518.7	470.7	595.7	542	522.633	640.933	559.2	567.067	1.17698	1.05093	1.0554	1.17674	1.13252	1.177	3	3
comp2249227_c0_seq1|m.37479	11	769.9	710.3	305.2	773	809	398.9	725.3	708.2	319.3	773	777.2	372.6	731.2	688.8	291.2	688	640.7	291.1	595.133	660.3	584.267	640.933	570.4	539.933	1.17586	1.28031	1.17986	1.17674	1.1552	1.12068	3	3
comp2265084_c0_seq1|m.59816	5	868	703.8	213.4	910.6	738.9	224.3	820.1	680.2	217	806	672.6	244.5	698.1	584.7	187.2	708.7	599.9	197.1	595.067	624.6	572.433	574.367	490	501.9	1.17573	1.21109	1.15596	1.05453	0.992372	1.04174	3	3
comp2278332_c0_seq1|m.88590	5	666.3	488.8	628.4	685.6	521.5	592.7	637.2	469.9	550.6	814.4	520.1	645.6	577.7	429.2	525.3	541.6	422.3	528.3	594.5	599.933	552.567	660.033	510.733	497.4	1.17461	1.16326	1.11585	1.21181	1.03436	1.0324	3	3
comp2266801_c0_seq2|m.62707	8	135.2	652.2	989.7	114.9	611	1033.5	107	588.3	934.4	120.4	653.7	1033.1	104.7	540.6	913.1	105.5	569.6	930.5	592.367	586.467	543.233	602.4	519.467	535.2	1.1704	1.13715	1.097	1.106	1.05205	1.11085	3	3
comp2187328_c0_seq1|m.10936	5	751.7	539.2	483.2	763.4	553.4	482	738.5	532.5	494.4	690.9	443.6	464.9	542.2	369.8	415.2	559.2	383	386.7	591.367	599.6	588.467	533.133	442.4	442.967	1.16842	1.16262	1.18834	0.978825	0.89597	0.919415	3	3
comp2278536_c1_seq38|m.89884	9	498	709.5	566.3	410.5	707.5	411.5	422.3	671.3	439.7	530.8	1010	624.3	537.9	802.7	600.5	516.7	738.6	528.8	591.267	509.833	511.1	721.7	647.033	594.7	1.16822	0.98856	1.03211	1.32503	1.3104	1.23435	3	3
comp2270952_c0_seq1|m.70164	5	693.2	341	738.1	652	341.4	661.9	671.9	356.9	733.3	833.4	416.7	928.6	724.3	377.9	817.3	678.5	351.1	708.1	590.767	551.767	587.367	726.233	639.833	579.233	1.16723	1.06987	1.18612	1.33335	1.29582	1.20225	3	3
gene1|m.92554	1	589.1	591.8		599.4	607		531.9	509.4		649.1	641.4		495.4	469.5		482.9	447.5		590.45	603.2	520.65	645.25	482.45	465.2	1.16661	1.1696	1.05139	1.18467	0.977081	0.965563	2	2
comp2245927_c1_seq1|m.34099	4	649.7	301.6	819.8	555.5	211.6	644.4	496.9	194.4	535	591.9	237.5	684.3	580.8	261.8	693	676.9	318.4	886.2	590.367	470.5	408.767	504.567	511.867	627.167	1.16644	0.912293	0.825458	0.926377	1.03666	1.30174	3	3
comp2276151_c0_seq3|m.81648	3		590.2			547.7			561.7			721.9			578.9			582.9		590.2	547.7	561.7	721.9	578.9	582.9	1.16612	1.06198	1.13429	1.3254	1.17242	1.20986	3	1
comp2267994_c0_seq2|m.64804	3		654.7	524.2		650.6	530.2		635.5	515.6		775.3	653.8		650.8	502.1		638.2	497.8	589.45	590.4	575.55	714.55	576.45	568	1.16463	1.14478	1.16226	1.3119	1.16745	1.17893	3	2
comp2246119_c0_seq1|m.34306	7	605.7	613.2	547.7	694	697.4	609.1	633.6	630.2	551	524.7	550.8	502.9	630.8	632.4	551	641	683.4	566.5	588.867	666.833	604.933	526.133	604.733	630.3	1.16348	1.29298	1.22159	0.965973	1.22474	1.30824	3	3
comp2271152_c0_seq9|m.70504	4	1056.2	140.7	568.5	1075.9	148.9	557.8	1061.6	139.9	584.7	1237.1	157	671.8	1084.9	161.3	655.4	1004.8	143.2	583.4	588.467	594.2	595.4	688.633	633.867	577.133	1.16269	1.15215	1.20234	1.26432	1.28374	1.19789	3	3
comp2261500_c0_seq2|m.54267	5	671.5		498.7	669.2		464.5	639.2		439.4	680.2		454	592.4		419.9	607		438.3	585.1	566.85	539.3	567.1	506.15	522.65	1.15604	1.09911	1.08905	1.04119	1.02508	1.0848	3	2
comp2258087_c0_seq1|m.48913	9	293.6	659.4	798.2	333.1	689.2	937.4	268.4	591.3	785.3	240.3	704.7	782.4	304	639.7	802.4	297.9	615	796.9	583.733	653.233	548.333	575.8	582.033	569.933	1.15334	1.26661	1.1073	1.05716	1.17876	1.18295	3	3
comp2042029_c0_seq1|m.4823	6	767.4	466.8	516	673.6	362.7	415.5	613.5	337.3	374.1	766.3	452.8	520.9	732.6	403.3	493.1	740.4	436.7	517.1	583.4	483.933	441.633	580	543	564.733	1.15268	0.93834	0.891828	1.06487	1.09971	1.17215	3	3
comp1781461_c0_seq1|m.2253	6	648.2	675.1	425.5	723.4	750.4	534.2	825	785.3	549	1267.5	1169.9	806.1	1198.2	1085.9	787.1	1044.8	968.6	685.5	582.933	669.333	719.767	1081.17	1023.73	899.633	1.15176	1.29783	1.45349	1.98501	2.07331	1.86727	3	3
comp2273332_c0_seq15|m.75115	4	568.6	599.9	580.3	632.5	741.5	669.1	597.4	710.3	628.4	524.4	628.2	573.9	571.3	618.4	562.5	557.8	638.1	533.3	582.933	681.033	645.367	575.5	584.067	576.4	1.15176	1.32051	1.30324	1.05661	1.18288	1.19637	3	3
comp2270963_c0_seq9|m.70181	2	582.4			591.5			545.4			699.6			594.2			561.9			582.4	591.5	545.4	699.6	594.2	561.9	1.1507	1.14691	1.10137	1.28446	1.2034	1.16627	1	1
comp2276386_c0_seq1|m.82241	10	858.1	359.2	527.7	872.2	410.7	610.7	845.9	390.1	551	912.2	428.8	499	904.6	430.5	554.5	838.4	431.4	575.4	581.667	631.2	595.667	613.333	629.867	615.067	1.14925	1.22389	1.20288	1.12607	1.27564	1.27662	3	3
comp2249377_c0_seq1|m.37601	4		383.8	779		421	981.6		411.9	848.8		462.4	883.6		391.9	813.2		396.6	808.3	581.4	701.3	630.35	673	602.55	602.45	1.14873	1.35981	1.27292	1.23562	1.22031	1.25044	3	2
comp2273416_c0_seq1|m.75294	7	526.9	792.1	424.6	578.7	844.1	491.7	538.9	747.6	421.7	494.7	781	433.9	477.5	750.2	433.9	500.2	753.9	424.2	581.2	638.167	569.4	569.867	553.867	559.433	1.14833	1.2374	1.14984	1.04627	1.12172	1.16115	3	3
comp2245721_c0_seq1|m.33844	6	549.8	618	575.7	431.5	452.9	382.7	489.5	517.9	465.2	452.1	484.3	465.7	418.4	442.7	374.8	398.5	410.9	371.7	581.167	422.367	490.867	467.367	411.967	393.7	1.14827	0.818963	0.991249	0.858078	0.834335	0.817158	3	3
comp2272876_c0_seq2|m.74167	6	537.8	678	525.8	653.2	800.4	670.3	709.5	819.1	657.4	607.1	712.3	584.7	542.1	608.8	517.6	514.4	605.5	497.8	580.533	707.967	728.667	634.7	556.167	539.233	1.14702	1.37274	1.47146	1.1653	1.12638	1.11923	3	3
comp2254576_c0_seq1|m.44130	6	1039.9	252.5	445.1	1151.4	313	468.2	1093.1	308.8	486.8	982.1	250.9	436.4	968.5	256.3	425.4	998.6	260.4	403.1	579.167	644.2	629.567	556.467	550.067	554.033	1.14432	1.2491	1.27134	1.02166	1.11402	1.14994	3	3
comp2277617_c1_seq7|m.85877	5	341.8	814.7		383.9	802.2		334.6	813		382.4	1003.1		338.4	866		344.8	771.8		578.25	593.05	573.8	692.75	602.2	558.3	1.1425	1.14992	1.15872	1.27188	1.2196	1.1588	3	2
comp2241424_c0_seq3|m.29932	8	939.2	213.3		1079.7	229.7		1016.6	241.6		764.6	210.1		825.3	245.8		785.5	199.4		576.25	654.7	629.1	487.35	535.55	492.45	1.13855	1.26945	1.2704	0.894767	1.08462	1.02212	3	2
comp2233909_c0_seq2|m.24641	5	1002.9	184.1	541.4	821.9	191.7	496.9	739.3	168.2	439	1076.2	190	523.4	1031.7	172.8	544.8	965.3	187.5	515.8	576.133	503.5	448.833	596.533	583.1	556.2	1.13832	0.97628	0.906368	1.09523	1.18092	1.15444	3	3
comp2268862_c1_seq1|m.66336	5	421.2	499.2	807.7	407	450.6	728.4	402.6	495.6	783.8	423	577.3	925.7	416.3	557.6	849.2	449.1	508	861.6	576.033	528.667	560.667	642	607.7	606.233	1.13812	1.02508	1.1322	1.1787	1.23074	1.25829	3	3
comp2277207_c0_seq11|m.84577	4	451.7	697		504.4	747.4		465.8	724.5		566.2	857.9		465	709.5		471.4	706.4		574.35	625.9	595.15	712.05	587.25	588.9	1.1348	1.21361	1.20184	1.30731	1.18933	1.22231	3	2
comp2278377_c0_seq3|m.88774	13	851	602	266.6	749.5	596.2	238.4	747	609.9	250.5	807	616.7	265.1	702.7	595.9	244.6	710.2	548.3	238.3	573.2	528.033	535.8	562.933	514.4	498.933	1.13253	1.02385	1.08199	1.03354	1.04179	1.03558	3	3
comp2273726_c1_seq7|m.75947	3	649.9		493	702.6		495.4	626.7		481.9	669.4		578.3	621.9		496.5	622.2		473.6	571.45	599	554.3	623.85	559.2	547.9	1.12907	1.16145	1.11935	1.14538	1.13252	1.13721	3	2
comp2260591_c2_seq1|m.52716	2	658.1		483.6	684.9		525.7	601.7		459.2	615.6		452.7	511.8		403.8	559.1		410.4	570.85	605.3	530.45	534.15	457.8	484.75	1.12788	1.17367	1.07118	0.980692	0.927159	1.00614	3	2
comp2271535_c0_seq1|m.71319	5	507.5	571.9	631.1	520	580.2	673.5	487.7	513.9	546.8	507.4	476	604.6	484.5	470.2	590.8	449.5	479.5	559.7	570.167	591.233	516.133	529.333	515.167	496.233	1.12653	1.14639	1.04227	0.971848	1.04334	1.02997	3	3
comp2258010_c0_seq1|m.48795	3	602.2		537.9	604.1		552.1	557.1		516.2	637.6		598.8	588		537.7	581.5		525.7	570.05	578.1	536.65	618.2	562.85	553.6	1.1263	1.12093	1.0837	1.13501	1.13991	1.14904	3	2
comp2189372_c0_seq1|m.11219	10	1013	264.5	430.7	708.5	161.6	334.2	831.7	201.9	385.3	1057.4	253.5	428.5	726.1	158.3	362.2	794.3	180.2	374.9	569.4	401.433	472.967	579.8	415.533	449.8	1.12502	0.778374	0.955102	1.0645	0.841558	0.933599	3	3
comp2347711_c0_seq1_contamination|m.91628	2	661.8	589.7	452.7	861.5	814.1	630.3	662.7	607.7	450.3	693.5	634.9	456.5	707.9	628.3	451.6	694.8	656	479.8	568.067	768.633	573.567	594.967	595.933	610.2	1.12238	1.49037	1.15825	1.09235	1.20691	1.26652	3	3
comp2271105_c0_seq1|m.70426	2	566.6			578.1			594.4			567.9			521.7			539.6			566.6	578.1	594.4	567.9	521.7	539.6	1.11949	1.12093	1.20032	1.04266	1.05657	1.11999	2	1
comp2277243_c1_seq3|m.84671	10	110.1	691.2	896.8	142.3	629.2	856	158	680.3	941.5	160.2	736.3	1094.9	147.9	703.2	1012.4	153.4	690	944.3	566.033	542.5	593.267	663.8	621.167	595.9	1.11837	1.0519	1.19803	1.21873	1.25802	1.23684	3	3
comp2140915_c0_seq2|m.7227	5	485.6	616.5	595.6	522.5	669.3	648.4	476.7	618.5	577.5	477.8	648.5	514.1	473.8	695.4	563.4	477.2	632.4	577.5	565.9	613.4	557.567	546.8	577.533	562.367	1.1181	1.18937	1.12594	1.00392	1.16965	1.16724	3	3
comp2262231_c0_seq10|m.55410	3		783.8	342.9		838.8	335.1		739.7	322.9		924.3	473.7		814.5	327.1		781.4	316	563.35	586.95	531.3	699	570.8	548.7	1.11306	1.13809	1.0729	1.28335	1.15601	1.13887	3	2
comp2270616_c0_seq4|m.69535	4		737.8	387.9		795.1	414.7		772.7	401		869.5	450.6		830.7	431.6		755.5	383	562.85	604.9	586.85	660.05	631.15	569.25	1.11208	1.17289	1.18508	1.21184	1.27824	1.18153	3	2
comp2253656_c0_seq2|m.42945	7	198.1	912.1	577.4	217.2	944.2	628	230.2	967.5	652.3	220.9	864.9	550.7	237.6	907.3	559.1	222.5	884.3	556.8	562.533	596.467	616.667	545.5	568	554.533	1.11145	1.15654	1.24529	1.00153	1.15034	1.15098	3	3
comp2245955_c0_seq1|m.34130	3	964.5	428.8	292.3	1332.9	632.7	335.6	1119.5	483	291.4	1046.2	384.8	281.6	1110.4	498.2	281.3	1042	387.2	277.8	561.867	767.067	631.3	570.867	629.967	569	1.11013	1.48733	1.27484	1.0481	1.27584	1.18101	3	3
comp2273858_c0_seq4|m.76235	3	686.4	435.2		694.2	499.4		655	410.3		838.6	522.5		656.3	384.8		621.7	359.1		560.8	596.8	532.65	680.55	520.55	490.4	1.10803	1.15719	1.07563	1.24948	1.05424	1.01787	3	2
comp2263954_c0_seq4|m.58152	4	594.9	524.5		412.6	336.2		404.4	322.6		513.4	442.1		491.5	395.3		523.7	422.8		559.7	374.4	363.5	477.75	443.4	473.25	1.10585	0.725957	0.734047	0.877142	0.897995	0.982271	3	2
comp2253104_c0_seq2|m.42113	4	585	275.5	814.2	505.1	231.2	740.6	398.1	188.9	585.8	517.2	249.1	792.4	441.2	214	641.3	455.6	205.2	652.5	558.233	492.3	390.933	519.567	432.167	437.767	1.10296	0.954563	0.789445	0.953917	0.875245	0.908622	3	3
comp2241992_c0_seq1|m.30524	9	380.1	391	888.9	418.4	494.1	1024.4	378.3	433.4	937.2	313.4	456.9	726.9	396.9	439.1	940.3	366	428.5	884.9	553.333	645.633	582.967	499.067	592.1	559.8	1.09327	1.25187	1.17723	0.916279	1.19915	1.16191	3	3
comp2269856_c0_seq1|m.68134	1	524.9		581.1	515.3		578.9	522		607.2	554.6		657.3	487.5		586.1	535.1		574.3	553	547.1	564.6	605.95	536.8	554.7	1.09262	1.06082	1.14015	1.11252	1.08715	1.15133	3	2
comp2268425_c0_seq2|m.65604	2	494.8	609.9		476.4	554.2		488.7	626.8		612.4	743.6		513.2	625		437.7	532.3		552.35	515.3	557.75	678	569.1	485	1.09133	0.99916	1.12631	1.2448	1.15257	1.00666	3	2
comp2266748_c0_seq1|m.62601	3	464		640.2	438.3		628.3	407.1		537	491		630.8	417.1		542.3	405.1		558.4	552.1	533.3	472.05	560.9	479.7	481.75	1.09084	1.03406	0.953251	1.0298	0.971512	0.999914	3	2
comp2265885_c0_seq3|m.61143	5	446.8	669.1	539	402.2	627.6	525.6	367.2	618	458.2	510.4	780.3	537.6	411.9	711.9	478.7	428.4	687.4	509.4	551.633	518.467	481.133	609.433	534.167	541.733	1.08992	1.0053	0.971594	1.11891	1.08182	1.12441	3	3
comp2275487_c0_seq4|m.79960	5	831.7	552.4	269.8	904.2	660.9	327.8	858.3	593.4	302	937.2	638.8	305.5	809.5	563.5	273.1	828.6	566.4	274.7	551.3	630.967	584.567	627.167	548.7	556.567	1.08926	1.22344	1.18047	1.15147	1.11125	1.1552	3	3
comp2244477_c0_seq1|m.32697	7	783.6	82.7	782.8	793.5	78.1	802.2	739.2	80.6	730.3	802.4	68.2	798.1	764.4	69.8	709.9	695.9	70.7	745.5	549.7	557.933	516.7	556.233	514.7	504.033	1.0861	1.08183	1.04342	1.02124	1.0424	1.04616	3	3
comp1769718_c0_seq1|m.2239	8	733	585.8	329.4	651.9	483.4	243.4	558.7	412.5	190.4	570.9	536.6	209.7	595.9	465.9	204	506.1	454.5	187.6	549.4	459.567	387.2	439.067	421.933	382.733	1.0855	0.891094	0.781906	0.80612	0.85452	0.794396	3	3
comp2266189_c0_seq1|m.61587	2		549.3			495.4			485.5			570.2			500.6			479.3		549.3	495.4	485.5	570.2	500.6	479.3	1.08531	0.960574	0.980412	1.04688	1.01384	0.994828	1	1
comp2267010_c0_seq1|m.63017	7	181.6	1098	364	191.4	1057.2	393.6	214.1	1072.1	334.2	190.8	1137.7	380.6	176.7	968.6	349.3	194.5	1035.7	379.8	547.867	547.4	540.133	569.7	498.2	536.667	1.08247	1.0614	1.09074	1.04596	1.00898	1.1139	3	3
comp2274259_c0_seq1|m.77220	5	397.2	780.4	463.8	469	851.2	506.7	398.6	775.4	457.9	460.9	939.2	543.9	437.9	920.7	494	412.7	843.6	476	547.133	608.967	543.967	648	617.533	577.433	1.08102	1.18078	1.09848	1.18972	1.25066	1.19851	3	3
comp2268473_c1_seq1|m.65668	5	659.7	102	879.1	635.1	237.6	1010.6	604.8	202.2	942.7	781.7	135.9	1033.4	633.1	211.7	970.3	625.9	216.1	969.1	546.933	627.767	583.233	650.333	605.033	603.7	1.08063	1.21723	1.17777	1.194	1.22534	1.25303	3	3
comp2214845_c0_seq1|m.16111	4			546.7			605.9			551.8			497.6			572.1			534.1	546.7	605.9	551.8	497.6	572.1	534.1	1.08017	1.17483	1.1143	0.913586	1.15864	1.10857	3	1
comp2254641_c1_seq1|m.44200	8	351.1	116.6	1171.2	353.2	115.5	1522.5	346.2	119.8	1008.3	298.1	124.3	1022.6	273.5	134.5	901.7	287.8	112	914.3	546.3	663.733	491.433	481.667	436.567	438.033	1.07938	1.28697	0.992394	0.884333	0.884156	0.909176	3	3
comp2257680_c0_seq1|m.48347	4	282.2	489	867.2	202.6	370.4	758.7	207.9	374.9	735.3	310.7	581.3	957.2	249.5	463.9	820.5	281.5	512.7	896.6	546.133	443.9	439.367	616.4	511.3	563.6	1.07905	0.860716	0.887251	1.1317	1.03551	1.1698	3	3
comp2260971_c0_seq1|m.53490	10	171	620.1	846.6	205	694.7	919.5	173.3	661.5	830.3	160.9	624.7	712.8	167.5	662	799.6	173.9	629.6	834.6	545.9	606.4	555.033	499.467	543.033	546.033	1.07859	1.1758	1.12083	0.917013	1.09978	1.13334	3	3
comp2232807_c0_seq1|m.23976	9	898.7	647	84.9	1031.4	864.7	171.4	946.6	651.6	86.9	1273.4	619.1	49.8	964.1	533	51.9	981.5	636.8	97.5	543.533	689.167	561.7	647.433	516.333	571.933	1.07391	1.33628	1.13429	1.18868	1.0457	1.1871	3	3
Vasa|m.92528	12	280.3	804.8	544.3	346.3	925.1	642.2	325.9	813.1	609.7	306.2	897.6	636.5	308.9	820.9	623.7	301	811.9	620.9	543.133	637.867	582.9	613.433	584.5	577.933	1.07312	1.23681	1.1771	1.12625	1.18376	1.19955	3	3
comp2277086_c2_seq1|m.84181	5		727.4	358.1		618.5	354.4		481.3	360.9		476.6	433.5		457	429.9		482.5	376.1	542.75	486.45	421.1	455.05	443.45	429.3	1.07236	0.94322	0.850363	0.835465	0.898096	0.891049	3	2
comp2268942_c0_seq5|m.66483	4	522.5	367.4	738.2	424	359.7	679.4	539	392.5	734.6	400.9	396.9	696.7	369.7	357.7	679.4	386.4	344.7	612.6	542.7	487.7	555.367	498.167	468.933	447.9	1.07226	0.945644	1.1215	0.914627	0.949706	0.929655	3	3
Pdu_trscr_assembly_1|4859;|m.82285	2		631.6	449.6		663.5	504.8		611.3	450.7		694	552		613.5	441.8		625.3	457.9	540.6	584.15	531	623	527.65	541.6	1.06812	1.13266	1.07229	1.14382	1.06862	1.12414	2	2
comp2142866_c0_seq1|m.7576	12	827.1	253.1	535.5	884.9	277.5	586.7	831.9	249.4	517.9	866	254.4	551.4	901.2	240	543.4	821.7	241	514.5	538.567	583.033	533.067	557.267	561.533	525.733	1.0641	1.13049	1.07647	1.02313	1.13724	1.0912	3	3
Pdu_trscr_assembly_1|7938;|m.67802	3	338.1	738.3		352.1	750.8		342	761.5		446.1	999.8		401.8	894.5		367.8	780.5		538.2	551.45	551.75	722.95	648.15	574.15	1.06337	1.06925	1.1142	1.32733	1.31266	1.1917	3	2
comp1195006_c0_seq1|m.888	1	528.9	552.9	529.8	514.5	522.7	513.5	488.5	493.9	473.4	355.9	378.8	344.3	389	389.4	380.4	381.5	403.5	376.6	537.2	516.9	485.267	359.667	386.267	387.2	1.0614	1.00226	0.979941	0.660343	0.782286	0.803667	3	3
comp1953077_c0_seq1|m.3483	4	418.5	681.4	507.9	470.9	364.7	566.9	400.9	285	487.1	409.1	268.2	501.1	345.6	242.4	416.3	385.4	259.9	470.1	535.933	467.5	391	392.8	334.767	371.8	1.0589	0.906476	0.78958	0.721175	0.677986	0.771703	3	3
comp2263394_c0_seq1|m.57263	2	559.7	584.8	463	555.8	566.3	481.9	556	568.2	465.3	488	480.6	417.2	594.1	593	501.4	576.4	613.5	530.4	535.833	534.667	529.833	461.933	562.833	573.433	1.0587	1.03671	1.06994	0.848103	1.13988	1.19021	3	3
comp2280536_c0_seq1|m.91231	3	280.6	615.1	710.4	256.7	612.4	637.9	280.2	579.2	710.5	299.4	629.9	766.8	275.4	627.9	716	266.1	591.2	680.3	535.367	502.333	523.3	565.367	539.767	512.533	1.05778	0.974018	1.05674	1.038	1.09316	1.06381	3	3
comp2273204_c0_seq26|m.74870	3	628.7	721.9	250.7	692.4	655.9	261.1	643	595.3	243.5	671.2	638.3	249.6	590	584.3	220.1	610.9	575.9	245.4	533.767	536.467	493.933	519.7	464.8	477.4	1.05461	1.0402	0.997442	0.954162	0.941335	0.990885	3	3
comp2248527_c0_seq2|m.36659	3	876.5	155.3	569.1	881.4	124.1	574.9	853.5	146.9	569.6	944.4	174	667.1	899.9	174.5	606.1	878.3	139	549.9	533.633	526.8	523.333	595.167	560.167	522.4	1.05435	1.02146	1.05681	1.09272	1.13448	1.08429	3	3
comp2259771_c0_seq2|m.51499	4	643.6	352.8	602.5	771.6	395.1	666.7	687.1	375.8	627.8	745	447.2	763.3	664.5	377.2	637.8	689.8	377.4	622.4	532.967	611.133	563.567	651.833	559.833	563.2	1.05303	1.18498	1.13806	1.19676	1.1338	1.16897	3	3
comp2268441_c0_seq1|m.65632	2	417.5	731	447.6	461.1	746.7	468.8	495.2	769.7	541.6	351.7	626.2	358.4	346.9	640.3	370.6	333.3	585.6	363.4	532.033	558.867	602.167	445.433	452.6	427.433	1.05119	1.08363	1.21601	0.817809	0.916627	0.887175	3	3
comp2252271_c0_seq2|m.41087	1	577	528.1	489.7	580.7	515.7	491.1	528.3	482.6	471.8	527.6	466.9	452.4	523	436.2	446.6	546.3	478	459.2	531.6	529.167	494.233	482.3	468.6	494.5	1.05033	1.02605	0.998048	0.885496	0.949031	1.02638	3	3
comp2268439_c0_seq11|m.65628	3	547.5	632.2	414	553.6	648.4	382.3	503.1	605.3	367.6	641.6	736.5	465.3	546.4	624.7	378.2	492.9	588.9	361.3	531.233	528.1	492	614.467	516.433	481.033	1.04961	1.02398	0.993538	1.12815	1.04591	0.998426	3	3
comp2272152_c1_seq1|m.72588	8	945.3	506.3	140.9	1009.5	600.8	157.6	948.4	534.4	147.6	931.1	574	186.1	873	484.7	148.5	923.7	519.9	163.5	530.833	589.3	543.467	563.733	502.067	535.7	1.04882	1.14264	1.09747	1.03501	1.01681	1.11189	3	3
comp2274869_c0_seq1|m.78512	4	374.4	334.1	881.8	383.1	361.2	887.2	360.5	348.4	839.6	388.4	354.9	1012.6	357.8	326.4	823.6	362.8	348.4	819.5	530.1	543.833	516.167	585.3	502.6	510.233	1.04737	1.05449	1.04234	1.0746	1.01789	1.05903	3	3
comp2278012_c0_seq11|m.87235	7	834.1		224.4	787.9		226.8	858.3		228.5	1051.7		250.7	943.9		231.9	919.3		233.1	529.25	507.35	543.4	651.2	587.9	576.2	1.04569	0.983745	1.09733	1.19559	1.19064	1.19595	3	2
comp2274043_c0_seq7|m.76739	7	308.8	688.1	590.8	353.2	765.9	616	342.6	710.1	557.9	305.7	732.2	568.7	320	702.9	554	330.3	695.2	548.5	529.233	578.367	536.867	535.533	525.633	524.667	1.04566	1.12145	1.08414	0.983231	1.06454	1.08899	3	3
comp2273494_c0_seq2|m.75493	1			529			526.7			489.8			551.6			480.1			519.7	529	526.7	489.8	551.6	480.1	519.7	1.0452	1.02126	0.989095	1.01273	0.972322	1.07868	3	1
comp2271350_c0_seq18|m.70898	5	321	890.1	373.8	333.1	1020.6	399.9	326.1	973	361.7	359.9	1004.5	394	323.6	864.7	359.2	306.9	838.2	345.2	528.3	584.533	553.6	586.133	515.833	496.767	1.04381	1.1334	1.11793	1.07613	1.04469	1.03108	3	3
comp2270905_c0_seq1|m.70068	4	475.4	560.3	546.4	372	440.6	397.1	355.9	392.9	394	410.7	498.1	485.7	400.3	451.5	438.4	494.2	581.2	549.2	527.367	403.233	380.933	464.833	430.067	541.533	1.04197	0.781864	0.769251	0.853427	0.870992	1.124	3	3
comp2260264_c0_seq2|m.52181	6	685.7	207.8	688.2	702.3	196.3	721.8	646.2	217.2	654.3	538.2	262.2	502.9	583.1	237.5	580.2	624.6	211	637.8	527.233	540.133	505.9	434.433	466.933	491.133	1.04171	1.04731	1.02161	0.797613	0.945656	1.01939	3	3
comp2264055_c0_seq1|m.58358	6	602.6	427	547.7	577.4	389.4	439.5	620.7	459.8	543.5	636.1	463.4	587.6	574.7	446.9	575.2	686.8	524.9	617.3	525.767	468.767	541.333	562.367	532.267	609.667	1.03881	0.908932	1.09316	1.0325	1.07797	1.26542	3	3
comp2254477_c0_seq1|m.44015	6	300.9	572.9	703	282.1	592.6	675.8	246	528.8	631.6	230	514.2	616.9	252.9	505.1	601.8	257.5	496.9	602.3	525.6	516.833	468.8	453.7	453.267	452.233	1.03848	1.00213	0.946688	0.832987	0.917977	0.938649	3	3
Pdu_trscr_assembly_1|16265;|m.66886	6	301.3	325.3	945.9	365.6	300.1	1057.5	304.2	312.7	915	379.1	378	1084.7	318.9	336	951.5	291.1	314.1	927	524.167	574.4	510.633	613.933	535.467	510.733	1.03565	1.11375	1.03117	1.12717	1.08445	1.06007	3	3
comp2260997_c1_seq7|m.53574	8	588.6	544.5	438.4	550.9	502	365	518.6	499.9	376.1	532.5	507.7	413.5	461.8	469.4	341.7	474.8	463.3	338.7	523.833	472.633	464.867	484.567	424.3	425.6	1.03499	0.91643	0.938745	0.889657	0.859313	0.883369	3	3
comp2273845_c0_seq2|m.76206	4		522			535.3			566.5			643			537.4			518.5		522	535.3	566.5	643	537.4	518.5	1.03137	1.03794	1.14398	1.18054	1.08837	1.07619	3	1
comp2273700_c0_seq3|m.75890	3	361.5	888.1	314.1	375.1	946.2	330.7	345.2	855.2	328.6	420.6	1065	398.6	433.6	1004.9	382.1	390.7	900.5	342.2	521.233	550.667	509.667	628.067	606.867	544.467	1.02985	1.06774	1.02921	1.15312	1.22906	1.13009	3	3
comp2279567_c0_seq1|m.91146	5	823.2	577.5	162.1	698.4	605.1	154.3	623.8	571.4	144	724.9	657.1	150.3	714.1	629.4	165.1	667	630.7	168.6	520.933	485.933	446.4	510.767	502.867	488.767	1.02926	0.942218	0.901454	0.93776	1.01843	1.01448	3	3
comp2270085_c0_seq9|m.68531	7		566.4	471.6		504.7	507.5		617.4	571.7		821.9	739.3		731.2	640.3		561.2	523.3	519	506.1	594.55	780.6	685.75	542.25	1.02544	0.981321	1.20063	1.43317	1.38881	1.12549	3	2
comp2271520_c0_seq1|m.71274	3	573.8	381.6	599.6	592	418.2	599.3	554.9	359.8	588.5	650.1	379.6	587.2	580	374.5	610.8	594.7	373	609.2	518.333	536.5	501.067	538.967	521.767	525.633	1.02412	1.04027	1.01185	0.989535	1.05671	1.091	3	3
comp2247988_c0_seq1|m.36173	5	686.2	420.2	448	803.5	480.8	505	688.7	390.3	436.8	683.7	391.2	426.4	720.6	434.7	442.8	893.8	550.5	583.4	518.133	596.433	505.267	500.433	532.7	675.9	1.02373	1.15648	1.02033	0.918788	1.07885	1.40289	3	3
comp2276957_c0_seq2|m.83834	3	639.5	483.2	430.5	630.1	484.2	437.6	727.1	549.5	477.5	883.8	689.2	546.5	804.7	570.1	514.1	655.3	445.3	417.7	517.733	517.3	584.7	706.5	629.633	506.1	1.02294	1.00304	1.18074	1.29712	1.27516	1.05045	3	3
comp2242282_c0_seq1|m.30761	5	500.6	399.6	652.4	548.6	452	745.7	512.2	425.2	734.1	441	395.5	646.6	520.4	414	706.8	558.1	431	721.1	517.533	582.1	557.167	494.367	547.067	570.067	1.02254	1.12868	1.12513	0.90765	1.10795	1.18322	3	3
comp2264670_c0_seq7|m.59199	4	576.8	494.2	477.7	572.5	471.7	458.6	505.6	456.3	460	473.1	494.7	493.2	477.8	453.7	462.1	491.3	475.3	478.1	516.233	500.933	473.967	487	464.533	481.567	1.01997	0.971303	0.957122	0.894125	0.940795	0.999533	3	3
comp2265526_c0_seq1|m.60574	4	259.1	784.1	504.3	260.8	709	488.9	243.1	649.7	460.1	268.4	758.5	522.9	310.4	766.8	477.4	246	650.3	454.2	515.833	486.233	450.967	516.6	518.2	450.167	1.01918	0.9428	0.910676	0.94847	1.04948	0.93436	3	3
comp2273628_c0_seq6|m.75728	4	447.3	473.2	624.2	441.6	449.9	612.4	441.4	467.7	656.2	455.3	490.3	636.4	430	457.1	608	418.8	442.1	597.4	514.9	501.3	521.767	527.333	498.367	486.1	1.01734	0.972014	1.05365	0.968176	1.00932	1.00894	3	3
comp2276166_c0_seq8|m.81705	4	523.4	519	501.4	593.2	635.9	603.3	592.7	611	582.3	627.4	659	621	699.3	703.1	698.3	582.2	579.3	551.3	514.6	610.8	595.333	635.8	700.233	570.933	1.01674	1.18433	1.20221	1.16732	1.41815	1.18502	3	3
comp2266473_c1_seq14|m.62086	7	1075.8	336.2	130.9	1146	353.5	123.9	1069.4	308.7	117.8	1209.3	324.3	210	1034.7	318.5	121.6	1067.1	314.4	126.6	514.3	541.133	498.633	581.2	491.6	502.7	1.01615	1.04925	1.00693	1.06707	0.995612	1.0434	3	3
comp2276191_c0_seq4|m.81757	3		458.1	569.9		504.8	588.1		472.6	592.3		493.8	667.7		449.1	539.3		423.8	527.6	514	546.45	532.45	580.75	494.2	475.7	1.01556	1.05956	1.07522	1.06625	1.00088	0.987356	3	2
comp2245391_c0_seq1|m.33517	4	726.6	556.9	257.4	705.5	568.2	351.6	788.2	627.1	397.8	688.3	453.8	294.2	783.6	573.3	343	787.5	647.4	391.3	513.633	541.767	604.367	478.767	566.633	608.733	1.01483	1.05048	1.22045	0.879009	1.14757	1.26348	3	3
comp2274763_c0_seq1|m.78294	2	513.6			489.8			460.8			522.8			462.9			459.4			513.6	489.8	460.8	522.8	462.9	459.4	1.01477	0.949716	0.930533	0.959853	0.937487	0.953524	1	1
comp2254544_c0_seq2|m.44094	5	628	72.2	835.1	652.4	82.9	854	536.3	82.1	732.6	725.1	68.7	970.6	738.7	79.2	963.9	799.1	75.4	1003.1	511.767	529.767	450.333	588.133	593.933	625.867	1.01115	1.02721	0.909397	1.0798	1.20286	1.29904	3	3
comp2278433_c0_seq2|m.89062	10	453.3	425.8	654.5	529.3	454	747.6	481.1	426.2	665.8	504.6	431.4	706.4	475.7	402.2	626.7	465.3	408.3	635	511.2	576.967	524.367	547.467	501.533	502.867	1.01003	1.11873	1.0589	1.00514	1.01573	1.04374	3	3
comp2273900_c0_seq1|m.76336	7	506.5	635.2	391.7	528.9	629.9	467.6	474.4	577.2	464.7	507.8	606.3	513.8	435.9	563.5	493.2	457.1	545.5	443.9	511.133	542.133	505.433	542.633	497.533	482.167	1.0099	1.05119	1.02067	0.996267	1.00763	1.00078	3	3
comp1958245_c0_seq1|m.3536	3	405.7	509.6	608.6	533.9	671.9	775.2	453.9	542.5	654.1	402.3	495.1	592.3	423.5	504.6	576.5	466.4	574.2	687.9	507.967	660.333	550.167	496.567	501.533	576.167	1.00364	1.28038	1.111	0.911689	1.01573	1.19588	3	3
comp2269936_c0_seq1|m.68260	2	719	526.8	277.8	732.7	523.3	316.6	712.4	489.6	323.8	698.6	531.7	287.9	639.7	488	284	655	504.8	312.6	507.867	524.2	508.6	506.067	470.567	490.8	1.00344	1.01642	1.02706	0.929131	0.953014	1.0187	3	3
comp2266625_c0_seq2|m.62367	4	150.7	863.4		154.2	860.3		170.5	874		163.7	956.8		155.2	858.7		133.6	816		507.05	507.25	522.25	560.25	506.95	474.8	1.00183	0.983551	1.05462	1.02861	1.0267	0.985488	3	2
comp2273496_c0_seq6|m.75495	2	499.4	752.4	263.8	470.5	800.1	276.3	439.1	702.4	249.5	525.4	841.8	344.9	464.6	927.8	262.3	471.1	738.3	262.3	505.2	515.633	463.667	570.7	551.567	490.567	0.998172	0.999806	0.936322	1.0478	1.11706	1.01821	3	3
comp2269193_c0_seq1|m.66978	7	438.4	738.9	338.2	500.4	817.3	367.5	443.3	745.7	346.8	479	846.8	396.3	463.3	765.3	383.9	449.2	738.5	337.8	505.167	561.733	511.933	574.033	537.5	508.5	0.998107	1.08919	1.03379	1.05392	1.08857	1.05544	3	3
comp2247821_c0_seq5|m.35979	4	415.7	646.4	451.9	374.7	598.4	414.8	410.9	653.3	428.8	419.8	654.4	468.7	421.8	666.1	456.8	374.7	621.4	422.9	504.667	462.633	497.667	514.3	514.9	473	0.997119	0.89704	1.00498	0.944247	1.0428	0.981752	3	3
comp2275179_c1_seq1|m.79255	5	435.5	587.1	487.9	456.6	581.6	541.3	431.9	567.3	466.3	385.4	536.9	434.7	411.7	534.1	474.7	369.1	492.7	446.3	503.5	526.5	488.5	452.333	473.5	436.033	0.994814	1.02088	0.98647	0.830477	0.958955	0.905025	3	3
comp2261134_c0_seq1|m.53793	5	214.4	452.6	840.1	213.3	435.6	810.3	214.4	387.6	763	197.5	399.3	769.1	223.3	380.9	708.9	218.9	373.4	754.2	502.367	486.4	455	455.3	437.7	448.833	0.992574	0.943123	0.918821	0.835924	0.886451	0.931592	3	3
comp2268076_c0_seq2|m.64973	2			501.7			549.1			495.2			603.5			557.9			541.3	501.7	549.1	495.2	603.5	557.9	541.3	0.991257	1.0647	1	1.10802	1.12989	1.12351	1	1
comp2269185_c0_seq2|m.66962	5	378.1	683.2	441.5	442.9	751.3	504	401.8	693.2	465.2	411.7	746.4	478.4	408.1	674.2	472.7	422.9	691.6	474.3	500.933	566.067	520.067	545.5	518.333	529.6	0.989742	1.0976	1.05022	1.00153	1.04975	1.09923	3	3
comp2278508_c0_seq2|m.89623	7	664.1	450.9	379.7	646.6	425.4	372.2	730.1	490.8	424.4	432.5	371.5	352.5	501.1	336.3	302	576.4	382.3	316.9	498.233	481.4	548.433	385.5	379.8	425.2	0.984408	0.933428	1.1075	0.707772	0.769189	0.882539	3	3
comp2264121_c0_seq1|m.58459	3	351.6	641.2	501.1	371.2	722.4	510.4	337.7	678	472.3	245.4	496.1	350.7	379.9	681.7	502.7	367.7	696.9	467.3	497.967	534.667	496	364.067	521.433	510.633	0.983881	1.03671	1.00162	0.668421	1.05603	1.05986	3	3
comp2261362_c0_seq2|m.54116	4	610.7	348.5	533.5	674.8	390.6	615.3	588.2	353.3	534.3	500.7	258.3	445	497.5	288.3	454.1	528.3	288.6	458.5	497.567	560.233	491.933	401.333	413.3	425.133	0.98309	1.08628	0.993403	0.736842	0.837035	0.882401	3	3
comp1335339_c0_seq2|m.1954	3	475.1	478.2	534	589.8	561.2	628.8	521.4	503.8	554.3	517.8	470.3	567.7	599.8	564.7	623.2	477.1	443.3	525.1	495.767	593.267	526.5	518.6	595.9	481.833	0.979534	1.15034	1.06321	0.952142	1.20685	1.00009	3	3
Pdu_trscr_assembly_1|17049;|m.35386	9	539.2	251.9	695.1	587	299.2	762	535.1	261.6	666	601.5	286.8	770	560.9	277.8	706	517	266.1	667.3	495.4	549.4	487.567	552.767	514.9	483.467	0.97881	1.06528	0.984585	1.01487	1.0428	1.00348	3	3
comp2269327_c0_seq1|m.67222	4	759.1	495.9	230.9	767.4	532.9	227.3	765.7	484.9	235.9	919.3	523.5	342.1	734	440.3	261.1	700.7	451.3	236.7	495.3	509.2	495.5	594.967	478.467	462.9	0.978612	0.987332	1.00061	1.09235	0.969014	0.960789	3	3
comp2274787_c0_seq1|m.78332	7	417.9	564.7	503.1	450.4	567.2	579.3	417.6	571.4	552.5	437	533.9	490.6	438.3	528.4	506.5	397.2	503.1	512.3	495.233	532.3	513.833	487.167	491.067	470.867	0.97848	1.03212	1.03763	0.894431	0.994532	0.977324	3	3
comp2266280_c0_seq1|m.61789	5	448.9	1010	25.3	492.3	1007.4	26.3	460.5	1013	25.7	434.1	1131.7	17	407.5	924.6	23.1	374.2	864.4	22.4	494.733	508.667	499.733	527.6	451.733	420.333	0.977492	0.986298	1.00915	0.968666	0.914872	0.872438	3	3
comp2267558_c0_seq1|m.64038	4	617.3	133.6	730.4	614.7	130.2	767	614.9	120.2	757.9	638.1	127.6	855.3	583.1	116.8	791.3	669.8	112.9	781.9	493.767	503.967	497.667	540.333	497.067	521.533	0.975582	0.977185	1.00498	0.992044	1.00668	1.08249	3	3
comp2256041_c0_seq1|m.46046	4	575.8	464.9	440.5	535.5	466.3	397.6	553.6	459.6	407	641.7	558.6	519.6	611.6	539.3	472.1	613.3	519	491.4	493.733	466.467	473.4	573.3	541	541.233	0.975517	0.904473	0.955977	1.05257	1.09566	1.12338	3	3
comp2273603_c1_seq3|m.75696	3	492.7			503.4			502.9			505.3			463.4			394			492.7	503.4	502.9	505.3	463.4	394	0.973475	0.976086	1.01555	0.927723	0.9385	0.817781	3	1
comp2207204_c0_seq1|m.14126	2		492.1			533.9			495.2			587.2			487.8			498.4		492.1	533.9	495.2	587.2	487.8	498.4	0.972289	1.03522	1	1.07809	0.987916	1.03447	3	1
comp1978194_c0_seq1|m.3886	3		434.9	548.9		326.8	417.9		298.8	383.5		400.8	504.6		270	359.1		352.3	455.8	491.9	372.35	341.15	452.7	314.55	404.05	0.971894	0.721982	0.688914	0.831151	0.637042	0.83864	3	2
comp2143410_c0_seq1|m.7655	2	527.5	455.7		588.3	483.6		605.8	502.1		515	465.4		559.8	473.9		543.2	448.9		491.6	535.95	553.95	490.2	516.85	496.05	0.971302	1.0392	1.11864	0.9	1.04675	1.02959	3	2
comp2265784_c0_seq1|m.60971	8	449.5	963.5	61.8	532.7	971	86.1	475.8	933	72.9	557.2	1125.5	69	477	946.1	65.5	477.2	877.7	78	491.6	529.933	493.9	583.9	496.2	477.633	0.971302	1.02753	0.997375	1.07203	1.00493	0.991369	3	3
Pdu_trscr_assembly_1|1051;|m.48910	5	249.9	337.2	886.4	304.9	313.5	961.4	262.5	290	843.2	248.6	321.3	903.1	251.8	272.3	811.7	250.3	286.7	836.1	491.167	526.6	465.233	491	445.267	457.7	0.970445	1.02107	0.939486	0.901469	0.901775	0.949996	3	3
comp2271737_c1_seq2|m.71770	3	458.8	348.2	665.7	420.1	304.8	316.2	367.8	264.5	247.3	504.5	415.6	410.3	459.4	380.8	345.2	563.9	475.5	391.4	490.9	347.033	293.2	443.467	395.133	476.933	0.969918	0.672893	0.592084	0.814198	0.800243	0.989916	3	3
comp2229921_c0_seq1|m.22367	12	525.2	564.3	383	549.9	571.9	382.2	564.2	606	407.5	578.2	614.7	405.2	559.5	593.8	392.4	534.1	563.8	365.1	490.833	501.333	525.9	532.7	515.233	487.667	0.969787	0.972079	1.062	0.978029	1.04348	1.01219	3	3
Pdu_trscr_assembly_1|1753;|m.59536	2	490.7			507.7			476.4			553			506			500.7			490.7	507.7	476.4	553	506	500.7	0.969523	0.984423	0.962036	1.0153	1.02478	1.03925	2	1
comp2257131_c0_seq2|m.47590	4	516.9	646.5	304.6	576.7	691.7	336.9	580.5	709.6	358.6	444.5	575	332	424.1	523.8	297.2	442.1	571.7	287.1	489.333	535.1	549.567	450.5	415.033	433.633	0.966823	1.03755	1.10979	0.827111	0.840545	0.900043	3	3
comp2267326_c0_seq1|m.63623	3	681.3	481.5	302.9	720.1	561.5	314.6	666	515.6	326.7	857.7	614.9	402.7	798.4	611.3	347.3	704.9	544.9	343.7	488.567	532.067	502.767	625.1	585.667	531.167	0.965308	1.03167	1.01528	1.14767	1.18612	1.10248	3	3
comp2235681_c0_seq1|m.25791	4	743.4	436.2	283.5	786.7	463	304	738.1	419.4	269.5	728.4	432.3	254.7	690.7	381.2	262.9	696.6	391.3	260.3	487.7	517.9	475.667	471.8	444.933	449.4	0.963596	1.0042	0.960555	0.866218	0.9011	0.932768	3	3
comp2214073_c0_seq1|m.15858	1		487.1			441.6			433.4			539.5			453.4			441.7		487.1	441.6	433.4	539.5	453.4	441.7	0.96241	0.856256	0.875202	0.990514	0.918247	0.916786	2	1
comp2256252_c0_seq1|m.46348	3			487			480.6			523.8			940.1			830.4			576	487	480.6	523.8	940.1	830.4	576	0.962213	0.931877	1.05775	1.72601	1.68177	1.19554	2	1
comp2266781_c0_seq2|m.62673	7	375.4	638.9	444.4	423.3	651.8	443.1	365	655.3	446.9	432.4	748.1	551.7	321.7	669.7	488.5	354	650.5	439.5	486.233	506.067	489.067	577.4	493.3	481.333	0.960698	0.981256	0.987614	1.0601	0.999055	0.999049	3	3
comp2214237_c0_seq1|m.15894	3	428.9	405.2	622.3	488.6	431.9	712.5	432.5	410.1	609.7	442.4	509.4	713.2	424.4	404.9	652.4	411	383.5	621.6	485.467	544.333	484.1	555	493.9	472.033	0.959183	1.05546	0.977585	1.01897	1.00027	0.979746	3	3
comp2251418_c0_seq1|m.40073	5	450.9	464.9	538.9	451.3	473.4	478.1	412.9	432.1	438.9	443	436	531.6	425.2	441.8	476	447.7	468.6	436	484.9	467.6	427.967	470.2	447.667	450.767	0.958064	0.90667	0.86423	0.86328	0.906636	0.935605	3	3
comp2275417_c0_seq1|m.79780	1		482.9			438.3			401.1			440.7			396			386.9		482.9	438.3	401.1	440.7	396	386.9	0.954112	0.849858	0.809976	0.809119	0.801998	0.803044	2	1
Pdu_trscr_assembly_1|3240;|m.4139	5	314.8	1043.1	90.7	333.9	990.2	155.6	322.9	979.9	155.5	299.1	1120.8	134.2	291.1	963.5	121.6	309	940.2	159.1	482.867	493.233	486.1	518.033	458.733	469.433	0.954046	0.956373	0.981624	0.951102	0.929049	0.974349	3	3
comp2265187_c0_seq3|m.59968	1			481.1			488.2			470.3			404.2			414.7			411.6	481.1	488.2	470.3	404.2	414.7	411.6	0.950556	0.946613	0.949717	0.742105	0.83987	0.854311	1	1
comp2267483_c0_seq3|m.63902	7	366.4	656.7	419.7	406.9	676.9	461	384.3	601.3	424.4	408.8	684.9	391.7	373	577.8	371.8	375.3	593	381.3	480.933	514.933	470	495.133	440.867	449.867	0.950226	0.998449	0.949111	0.909058	0.892864	0.933737	3	3
comp2257281_c0_seq1|m.47768	4	567.6	585.9	288	492.8	523.5	266.2	513.8	542.6	259.4	613.8	608.8	249.6	538.6	562.9	255.4	544	587.7	269.9	480.5	427.5	438.6	490.733	452.3	467.2	0.94937	0.828917	0.885703	0.900979	0.91602	0.969714	3	3
comp2273376_c0_seq1|m.75201	3	443.2	411.3	584.3	439.6	409.4	600.9	348.3	381.7	512.4	351.9	367.1	513	312.4	336.9	453.1	322.9	343.9	467.6	479.6	483.3	414.133	410.667	367.467	378.133	0.947592	0.937112	0.836295	0.753978	0.744211	0.784848	3	3
comp2263667_c0_seq1|m.57601	6	640.6	323.2	474.1	767.5	360	572.6	630.2	311.8	496.2	598.6	328.9	383.7	601	322.4	442.3	640.4	305.4	483.9	479.3	566.7	479.4	437.067	455.233	476.567	0.946999	1.09882	0.968094	0.802448	0.92196	0.989155	3	3
comp2266513_c1_seq1|m.62146	4	573.3	383	481.3	586.9	431.9	502.5	603.1	399.3	487.3	572.2	328.6	418.3	542.3	341.6	443.1	554.9	357.7	416.8	479.2	507.1	496.567	439.7	442.333	443.133	0.946802	0.98326	1.00276	0.807283	0.895835	0.919761	3	3
comp2274558_c4_seq2|m.77893	2			478.8			459.8			457.3			576.2			459			421.9	478.8	459.8	457.3	576.2	459	421.9	0.946011	0.891546	0.923465	1.05789	0.929589	0.87569	1	1
comp2269901_c0_seq1|m.68198	7		472.2	482.6		521.6	533.5		450.5	479.5		468.8	473.7		447.6	474.4		448.6	441.6	477.4	527.55	465	471.25	461	445.1	0.943245	1.02291	0.939015	0.865208	0.933639	0.923843	3	2
comp2263422_c0_seq1|m.57303	2	600.6		353.9	478.5		160.6	486.1		125.3	572.7		155.9	441.8		122.7	472.3		127.3	477.25	319.55	305.7	364.3	282.25	299.8	0.942949	0.619603	0.617326	0.668849	0.571626	0.622261	3	2
comp2264793_c0_seq1|m.59359	3	226.1	547.9	657.7	205.5	485.9	590.5	223	536	644.8	269.7	709.4	823	226.3	583.2	690.6	218.3	559.9	652.9	477.233	427.3	467.933	600.7	500.033	477.033	0.942916	0.828529	0.944938	1.10288	1.01269	0.990124	3	3
comp2170645_c0_seq1|m.10051	4		273	680.8		292	714.6		271	672.5		336.1	758.3		285.6	694.4		274.2	715	476.9	503.3	471.75	547.2	490	494.6	0.942257	0.975892	0.952645	1.00465	0.992372	1.02658	2	2
tudor1|m.92430	2	476.9			475.2			474.2			618.8			516.4			469.2			476.9	475.2	474.2	618.8	516.4	469.2	0.942257	0.921406	0.957593	1.13611	1.04584	0.973865	3	1
comp2265240_c0_seq3|m.60084	3	402.7	411.4	614.7	395.7	379.5	612	398.6	365.8	566.7	420.9	444.3	577	377.2	363.5	599.7	357.1	358.7	602.7	476.267	462.4	443.7	480.733	446.8	439.5	0.941006	0.896587	0.896002	0.882619	0.904881	0.91222	3	3
comp2267217_c0_seq1|m.63416	3	627.7	324.2		520.1	273.5		487.2	247.7		602.9	311.6		511	269.6		488.7	249		475.95	396.8	367.45	457.25	390.3	368.85	0.94038	0.76939	0.742023	0.839504	0.790454	0.76558	3	2
comp2266806_c0_seq8|m.62715	9	167.7	440	819.4	180.9	514.8	892	147.4	457	762.4	138.3	449.5	771.2	131.8	454.3	749.9	136.4	513.4	780	475.7	529.233	455.6	453	445.333	476.6	0.939886	1.02618	0.920032	0.831701	0.90191	0.989224	3	3
comp2247805_c0_seq3|m.35963	4		544.6	406.7		523.2	433		465.1	412.3		553.2	482.4		494.5	402.1		514.6	391.1	475.65	478.1	438.7	517.8	448.3	452.85	0.939788	0.927029	0.885905	0.950673	0.907919	0.939929	3	2
comp2266884_c0_seq1|m.62838	3	551.8		398.5	608.7		474.9	601.8		434.2	686.6		491.8	620.9		441	602.8		454.5	475.15	541.8	518	589.2	530.95	528.65	0.9388	1.05054	1.04604	1.08176	1.07531	1.09726	2	2
comp2238157_c0_seq1|m.27556	4	612.1	120.2	692.3	591.3	142.9	712.7	565.1	122.3	650	617.3	125.3	705.9	521.1	122.3	657	539	115.5	644.2	474.867	482.3	445.8	482.833	433.467	432.9	0.93824	0.935173	0.900242	0.886475	0.877878	0.898521	3	3
comp2276389_c1_seq15|m.82251	3	696.9	579.1	145.8	679.4	563.4	134.2	636.7	513.6	141.2	702.7	540.6	161.3	614	518	126.9	595.1	481.3	132.4	473.933	459	430.5	468.2	419.633	402.933	0.936396	0.889995	0.869346	0.859608	0.849862	0.836323	3	3
comp2273180_c0_seq2|m.74813	7	801.8	145.7		862.8	180.2		793	167.6		859.4	151.1		832.4	204.8		819.1	168.3		473.75	521.5	480.3	505.25	518.6	493.7	0.936034	1.01118	0.969911	0.927632	1.05029	1.02472	3	2
comp2273558_c1_seq4|m.75587	2	485.5	460.7		441.5	460		441.4	455.5		273.4	270.3		277.6	275.3		274.7	277.3		473.1	450.75	448.45	271.85	276.45	276	0.934749	0.873998	0.905594	0.499113	0.55988	0.572862	3	2
comp2268340_c1_seq1|m.65478	10	346.2	667.4	402.9	386.9	608.7	363.8	372.2	623.9	346.6	392.9	798.3	436.3	446.4	699.2	435	337.4	664.7	361.1	472.167	453.133	447.567	542.5	526.867	454.4	0.932905	0.878619	0.90381	0.996022	1.06704	0.943146	3	3
comp2269220_c0_seq10|m.67031	5	622.7	314.6	477.9	642.3	316	517.3	574	294.9	435.7	595.4	346.6	406.4	576.4	302.3	439.8	581.4	303.7	438.9	471.733	491.867	434.867	449.467	439.5	441.333	0.932049	0.953723	0.878164	0.825214	0.890097	0.916025	3	3
comp2245951_c0_seq1|m.34128	4	490.7	364.8	558.4	481.4	362.9	607.5	456.4	362.7	592.5	639.8	505.2	736.6	506	364.2	582.6	489.4	367.6	609.3	471.3	483.933	470.533	627.2	484.267	488.767	0.931193	0.93834	0.950188	1.15153	0.98076	1.01448	3	3
comp2278234_c1_seq4|m.88161	4	537.4	320	552.4	572.9	348	570.8	576.8	342.2	553	618.7	405.9	716.5	559	342.6	580.1	528.3	327.1	553.6	469.933	497.233	490.667	580.367	493.9	469.667	0.928493	0.964129	0.990845	1.06554	1.00027	0.974834	3	3
comp2277924_c1_seq2|m.86919	8	350.2	576.9	479.7	421.5	675.7	537.9	391.3	582.1	491.2	454.6	824.7	625.2	396.9	660.5	539.7	398.8	651.4	512.4	468.933	545.033	488.2	634.833	532.367	520.867	0.926517	1.05681	0.985864	1.16554	1.07817	1.0811	3	3
comp2220592_c0_seq2|m.18297	2	331	610.4	463.7	302	537.5	420.3	297.9	513.2	391.8	315.4	535.9	411.2	338	555.6	426.1	323.8	549.9	442.5	468.367	419.933	400.967	420.833	439.9	438.733	0.925397	0.814245	0.809707	0.772644	0.890907	0.910629	3	3
comp2269324_c0_seq1|m.67217	7	244.1	769.5	391	335.4	980.9	511.2	244	729.9	386.2	259.8	774.6	404.1	252.2	786.5	423.1	266.1	823.5	422.8	468.2	609.167	453.367	479.5	487.267	504.133	0.925068	1.18117	0.915522	0.880355	0.986836	1.04637	3	3
comp2278143_c0_seq7|m.87739	3	746.7		189	675.4		159.4	738.8		157.8	830.9		240	748.7		160.6	722.2		168.3	467.85	417.4	448.3	535.45	454.65	445.25	0.924376	0.809333	0.905291	0.983078	0.920779	0.924155	3	2
comp2264685_c0_seq2|m.59212	7	546.9	406.3	449.2	585.9	427.4	489.8	530.1	400.9	445.6	532.3	311.3	403.2	410.6	339.2	364.3	439.5	363.5	364.2	467.467	501.033	458.867	415.6	371.367	389.067	0.923619	0.971497	0.926629	0.763035	0.75211	0.807541	3	3
comp2265779_c1_seq4|m.60966	3	232.6	536.8	632.9	333.4	667.8	703.8	285.7	580.4	693.9	221.5	563	716.1	251	532.8	635.6	212.4	490.9	603.9	467.433	568.333	520	500.2	473.133	435.733	0.923553	1.10199	1.05008	0.91836	0.958212	0.904402	3	3
comp2272067_c0_seq1|m.72417	3	669.1	285.1	446.7	448.6	236.3	396.6	442.5	213.1	343.2	1009.9	432.1	594.6	810	368.6	465.6	659.4	335.2	433.4	466.967	360.5	332.933	678.867	548.067	476	0.922631	0.699005	0.672321	1.24639	1.10997	0.987979	3	3
comp2275352_c1_seq3|m.79617	9	612.2	140.3	648	630	134.9	689.1	667.5	138	668.7	718.4	153	732.8	635.7	124.2	637.2	592	115.3	580.6	466.833	484.667	491.4	534.733	465.7	429.3	0.922368	0.939762	0.992326	0.981763	0.943158	0.891049	3	3
comp2273813_c0_seq2|m.76128	4	513	507.1	379.1	582.9	630.9	405.3	537.8	565.8	384.8	684.1	688.3	512.6	668.9	665.5	498.1	606.1	638	420	466.4	539.7	496.133	628.333	610.833	554.7	0.921511	1.04647	1.00188	1.15361	1.23709	1.15133	3	3
comp2267682_c0_seq1|m.64238	5	452.3	436.2	509.8	441.2	508.7	604.7	424.4	449.6	521.7	620.4	528.4	602.7	455.9	483	606.8	478.6	534	627.4	466.1	518.2	465.233	583.833	515.233	546.667	0.920919	1.00478	0.939486	1.07191	1.04348	1.13465	3	3
comp2256220_c0_seq1|m.46316	8	787		144.3	655.6		129	692.7		141.7	844		172.1	737.5		144.8	733.7		134.4	465.65	392.3	417.2	508.05	441.15	434.05	0.92003	0.760664	0.842488	0.932772	0.893438	0.900908	3	2
comp2264755_c0_seq2|m.59317	8	572.3	453.6	370.6	638.5	513.9	395.5	592	475.3	361.3	656.7	563.6	416.5	584.2	457.5	308.7	576.4	465.8	333.9	465.5	515.967	476.2	545.6	450.133	458.7	0.919733	1.00045	0.961632	1.00171	0.911632	0.952071	3	3
comp2199878_c0_seq2|m.12889	4	580.4	205.6	610	707	283.8	694.3	664.5	265.4	652.7	697.7	291.6	679.2	599.7	251.7	603.7	672.6	297.4	647	465.333	561.7	527.533	556.167	485.033	539	0.919404	1.08913	1.06529	1.02111	0.982313	1.11874	3	3
comp2264489_c1_seq1|m.58962	1	540.5	389.2		551.7	354.1		491.3	347.4		697.4	489.7		483.9	316.7		479.5	323.1		464.85	452.9	419.35	593.55	400.3	401.3	0.918449	0.878167	0.84683	1.08975	0.810707	0.832933	2	2
comp2240664_c0_seq1|m.29323	4	457.6	672.3	261.8	392.4	544.1	208.9	401.5	537.4	215.7	387.9	536.3	208.8	327.6	454	172.5	319.3	449	173.4	463.9	381.8	384.867	377.667	318.033	313.9	0.916572	0.740305	0.777194	0.69339	0.644096	0.651526	3	3
comp2246959_c0_seq1|m.35125	4	69.9	571.7	749.4	87.2	596.6	701.5	80.8	653.8	791.4	116.1	811.6	1015.3	94.4	852.2	1071.2	76.5	673.8	891.8	463.667	461.767	508.667	647.667	672.6	547.367	0.916111	0.895359	1.02719	1.18911	1.36218	1.13611	3	3
comp2274483_c0_seq20|m.77737	7	504.2	468.9	417.9	493.5	480.9	407.1	478.1	481.8	371.7	558.9	545.2	449.5	474.4	494.7	393.5	498.8	463.1	389.2	463.667	460.5	443.867	517.867	454.2	450.367	0.916111	0.892903	0.896338	0.950796	0.919868	0.934775	3	3
comp2253021_c0_seq2|m.41967	4	355.5	571.8		358.9	558.5		379	620.6		415.1	783.4		362.9	632.4		352.8	579.2		463.65	458.7	499.8	599.25	497.65	466	0.916078	0.889413	1.00929	1.10021	1.00786	0.967223	3	2
comp2259020_c0_seq6|m.50443	4	561	471	358.4	533.4	501.5	415.2	508.2	464.2	396.2	556.1	511.4	422.2	530.8	481.5	425.5	508	461.8	365.9	463.467	483.367	456.2	496.567	479.267	445.233	0.915716	0.937241	0.921244	0.911689	0.970634	0.92412	3	3
comp2252713_c0_seq1|m.41623	3	506.5	420		491.8	390.3		486.6	391.1		539.6	450.1		539.5	433.7		519.2	411.2		463.25	441.05	438.85	494.85	486.6	465.2	0.915288	0.85519	0.886208	0.908537	0.985486	0.965563	3	2
comp2262895_c1_seq2|m.56493	2			463.2			454.4			436.7			451			498.3			462.6	463.2	454.4	436.7	451	498.3	462.6	0.915189	0.881075	0.881866	0.828029	1.00918	0.960166	3	1
comp2245687_c1_seq1|m.33822	3	690.5	232.1		679.6	209.4		652.1	214		627.7	238.1		573.7	174.9		522.5	156.1		461.3	444.5	433.05	432.9	374.3	339.3	0.911435	0.86188	0.874495	0.794798	0.75805	0.704246	3	2
comp1194051_c0_seq1|m.734	3	541.5	386.7	453.4	638.1	442.9	544.2	598.7	406.3	497.1	677.3	469.5	590.3	570.2	401.8	474.2	632.5	393.4	492.1	460.533	541.733	500.7	579.033	482.067	506	0.90992	1.05041	1.01111	1.0631	0.976305	1.05025	3	3
comp2268147_c0_seq1|m.65084	2		410.8	508.7		466.9	546.9		404.4	505.5		481.7	574.4		384.7	466.4		369.2	449.7	459.75	506.9	454.95	528.05	425.55	409.45	0.908372	0.982872	0.91872	0.969492	0.861844	0.849849	3	2
comp2277480_c0_seq18|m.85386	5	542	614.8	215.9	491.7	572.5	210.1	539.1	621.9	253.4	576.9	662.2	237.9	546.3	619.8	215.4	504.6	590.7	203.6	457.567	424.767	471.467	492.333	460.5	432.967	0.904059	0.823617	0.952073	0.903917	0.932627	0.89866	3	3
comp2257144_c0_seq1|m.47615	5	291.4	259.7	821.5	265.3	218.4	798.9	255.6	212.5	758	244.3	197.6	759.4	244.2	214.1	772.5	245.2	217.2	718.7	457.533	427.533	408.7	400.433	410.267	393.7	0.903993	0.828981	0.825323	0.73519	0.830892	0.817158	3	3
comp1194639_c0_seq1|m.858	1	490.9	497.2	383.3	520.6	491.5	400.4	593	579.5	471.2	636.8	560.9	498.6	552.4	507.5	423.4	481.1	463.9	384	457.133	470.833	547.9	565.433	494.433	443	0.903202	0.91294	1.10642	1.03813	1.00135	0.919485	3	3
LYamide_CDScloned_|m.92564	2	325.1	527.7	517.9	280.2	468.1	461	278.8	450.4	438.4	298.4	512.6	479.2	253.5	453.8	390.3	278.2	469.9	441.6	456.9	403.1	389.2	430.067	365.867	396.567	0.902741	0.781605	0.785945	0.789596	0.740971	0.823108	3	3
comp2276295_c0_seq1|m.82012	1	453.8			412.9			412.1			474.5			464			443.1			453.8	412.9	412.1	474.5	464	443.1	0.896616	0.800608	0.832189	0.871175	0.939715	0.919692	3	1
comp2271593_c0_seq2|m.71449	2	402	505.5		428.1	547.6		386.7	497.9		630	682.4		401.7	496.5		419.5	527.9		453.75	487.85	442.3	656.2	449.1	473.7	0.896518	0.945935	0.893174	1.20477	0.909539	0.983205	3	2
comp2251402_c0_seq2|m.40060	4	451			471.3			461.2			490.9			433.5			440.4			451	471.3	461.2	490.9	433.5	440.4	0.891084	0.913844	0.931341	0.901285	0.877945	0.914088	3	1
comp2278417_c0_seq2|m.88981	6	158.7	769.3	419.6	178.5	845.3	457.4	149.6	808.8	432.3	159.1	822.7	428.6	162.5	816.2	410.5	157.5	745.2	383.8	449.2	493.733	463.567	470.133	463.067	428.833	0.887528	0.957342	0.93612	0.863158	0.937825	0.89008	3	3
comp2246646_c0_seq1|m.34804	4	689.9	128.5	527.8	824.4	112.8	573.6	768.6	97.9	553.1	615.3	76.8	387.7	618.2	90.6	448.8	680.8	89.2	462.6	448.733	503.6	473.2	359.933	385.867	410.867	0.886606	0.976474	0.955574	0.660832	0.781476	0.852789	3	3
comp2253372_c0_seq1|m.42542	4	349.6	912.3	84.2	384.7	916.7	94	350.5	866.2	72.1	327.6	827.1	74.4	345.4	795.9	63.6	352.2	843.7	69.8	448.7	465.133	429.6	409.7	401.633	421.9	0.88654	0.901887	0.867528	0.752203	0.813407	0.87569	3	3
comp2274505_c0_seq7|m.77780	8	520.4	516.4	308.5	505.9	555	330.4	496.4	497.7	301	630.6	567	307.7	562.2	518.8	304.9	526.7	520	294.2	448.433	463.767	431.7	501.767	461.967	446.967	0.886013	0.899237	0.871769	0.921236	0.935597	0.927718	3	3
comp2272437_c1_seq1|m.73204	4	427.6	459.1	454.6	364.4	373.3	408.5	347.2	374.8	380.1	414.1	483.2	433.6	359.3	388.2	318.1	396.6	422.7	359.4	447.1	382.067	367.367	443.633	355.2	392.9	0.883379	0.740822	0.741855	0.814504	0.719368	0.815498	3	3
comp1770920_c0_seq1|m.2240	2	179		714.5	218.7		703.7	205		696.4	199.8		704.3	209.9		715.9	198.3		730.6	446.75	461.2	450.7	452.05	462.9	464.45	0.882687	0.894261	0.910137	0.829957	0.937487	0.964006	3	2
Pdu_trscr_assembly_1|20144;|m.60515	4	461.8	370.1	506	456.4	384.7	471.4	485.6	412.9	486.3	516.3	407.9	509.8	499.6	390.5	498.9	452.4	349.3	428.8	445.967	437.5	461.6	478	463	410.167	0.881139	0.848307	0.932149	0.877601	0.93769	0.851336	3	3
comp2257975_c0_seq1|m.48752	7	831.3	194.7	311.7	811.2	210.9	364.6	873.3	219.7	355.2	1072.1	227.2	406.7	1006	231.6	432.7	911.3	228.2	415.3	445.9	462.233	482.733	568.667	556.767	518.267	0.881008	0.896264	0.974825	1.04406	1.12759	1.07571	3	3
comp2275542_c0_seq9|m.80087	8	650.3	227	458	660.8	243.3	453.9	585.8	221.8	460.7	645.6	236.1	414.3	576.7	207.6	426.4	538.8	190.7	400.1	445.1	452.667	422.767	432	403.567	376.533	0.879427	0.877715	0.853729	0.793146	0.817323	0.781527	3	3
comp2223422_c0_seq1|m.19491	2			444.1			476			465.9			555.7			576.3			567.2	444.1	476	465.9	555.7	576.3	567.2	0.877451	0.922958	0.940832	1.02026	1.16715	1.17727	3	1
comp2265817_c0_seq5|m.61032	1			444.1			376.9			415.2			491.5			414			364.4	444.1	376.9	415.2	491.5	414	364.4	0.877451	0.730804	0.838449	0.902387	0.838453	0.756344	1	1
comp2276970_c2_seq1|m.83869	3	381.6	439.6	508.4	439.5	500.5	564.9	395.8	438	503.2	349.8	391.4	455.8	288	330.7	389.2	346.5	379.4	463.8	443.2	501.633	445.667	399	335.967	396.567	0.875673	0.97266	0.899973	0.732558	0.680416	0.823108	3	3
comp2265029_c1_seq4|m.59734	8	751.5	341.8	230.8	737.3	277.8	246.7	693.2	230.3	228.5	779.6	204	281	731.3	249.3	240	655.1	225.2	234.6	441.367	420.6	384	421.533	406.867	371.633	0.872051	0.815538	0.775444	0.773929	0.824006	0.771357	3	3
comp2262963_c0_seq1|m.56590	4		309.7	572.3		333.8	645.6		354.3	644		348.3	680.4		363	683.2		333.2	626.6	441	489.7	499.15	514.35	523.1	479.9	0.871326	0.949522	1.00798	0.944339	1.05941	0.996074	3	2
comp1194362_c0_seq2|m.804	6	404.9	528.2	389.6	458.2	582.4	440.2	437.3	503	388.7	469.5	551.8	411.2	422	463.9	364.2	431.2	486.2	370.9	440.9	493.6	443	477.5	416.7	429.433	0.871129	0.957084	0.894588	0.876683	0.843921	0.891326	3	3
comp2250851_c0_seq2|m.39414	2	439.5			428.2			396.5			486.9			437.7			417.9			439.5	428.2	396.5	486.9	437.7	417.9	0.868363	0.830274	0.800687	0.893941	0.886451	0.867387	3	1
Pdu_trscr_assembly_1|14069;|m.67140	3	52	890.9	372.6	57.6	796.7	322.4	57.2	736.3	314.7	67.9	779.2	317.4	60.9	697.6	290.5	57.9	675.8	273.1	438.5	392.233	369.4	388.167	349.667	335.6	0.866387	0.760535	0.745961	0.712668	0.708162	0.696567	3	3
comp2268769_c0_seq1|m.66191	1	464.3	411.2		469.8	398.1		431.1	382.2		426.4	345		435.2	353		376.7	336.1		437.75	433.95	406.65	385.7	394.1	356.4	0.864905	0.841423	0.821183	0.70814	0.79815	0.739739	2	2
comp2272372_c0_seq1|m.73058	4	507.9	286.8	518.4	591.3	346.1	610.1	542	330.9	566.2	615.9	321	630.9	615.6	364.1	629.5	593.7	333.6	587.2	437.7	515.833	479.7	522.6	536.4	504.833	0.864806	1.00019	0.9687	0.959486	1.08634	1.04782	3	3
comp2258806_c0_seq1|m.49958	6	267.9	643.6	401.3	303.2	747.2	448.2	265.4	693.1	417.5	308.8	889.1	515	291.5	763.2	453.9	261.6	752.7	425.3	437.6	499.533	458.667	570.967	502.867	479.867	0.864609	0.968588	0.926225	1.04829	1.01843	0.996004	3	3
comp2272203_c1_seq12|m.72687	2	437.3			483.7			377.8			404.3			378.4			411.7			437.3	483.7	377.8	404.3	378.4	411.7	0.864016	0.937888	0.762924	0.742289	0.766354	0.854519	2	1
comp2270800_c0_seq1|m.69879	3	361.1	289.6	658.7	343.8	281	628.4	382.1	309.2	683.3	536.8	343	774.9	402.5	287.2	653.3	359.3	278	629.4	436.467	417.733	458.2	551.567	447.667	422.233	0.862369	0.809979	0.925283	1.01267	0.906636	0.876382	3	3
comp2220973_c0_seq1|m.18490	3			435.6			414.9			391			462.5			355.5			396.2	435.6	414.9	391	462.5	355.5	396.2	0.860657	0.804486	0.78958	0.849143	0.719976	0.822347	3	1
comp2272395_c0_seq1|m.73105	1			435			450			445.2			446.1			380			424.6	435	450	445.2	446.1	380	424.6	0.859471	0.872544	0.899031	0.819033	0.769594	0.881294	1	1
comp2277904_c0_seq1|m.86840	1	411.7		455.5	228.4		280.4	316.7		358.5	472.8		568.9	342		394.9	322		357.1	433.6	254.4	337.6	520.85	368.45	339.55	0.856705	0.493278	0.681745	0.956273	0.746203	0.704765	3	2
comp2270384_c0_seq5|m.69104	3	533.2	277.1	489.6	560.4	302.2	603	512	288.8	586.6	484.5	260.2	482.7	500.1	293.7	527	478.6	286.4	562.1	433.3	488.533	462.467	409.133	440.267	442.367	0.856113	0.94726	0.933899	0.751163	0.891649	0.91817	3	3
comp2279748_c0_seq1|m.91174	5		293.3	573.3		293.9	559.3		289.8	559.1		382.9	606.3		275	534.9		300.5	536.2	433.3	426.6	424.45	494.6	404.95	418.35	0.856113	0.827172	0.857128	0.908078	0.820124	0.868321	3	2
comp2257068_c0_seq2|m.47511	4	492.3	457.5	349.9	452.8	427.9	304.3	436.6	430.3	303.4	392.2	362	264.7	412.1	373.8	275.2	414.9	395.7	292.6	433.233	395	390.1	339.633	353.7	367.733	0.855981	0.7659	0.787763	0.623562	0.71633	0.763262	3	3
comp2270444_c1_seq4|m.69204	5	270.6	693.2	333.2	309.9	748.8	330.1	274.9	703.3	304.8	286.8	760.9	323.3	291	723.1	292.7	296.3	663	290.2	432.333	462.933	427.667	457	435.6	416.5	0.854203	0.897622	0.863624	0.839045	0.882198	0.864482	3	3
comp2269902_c1_seq1|m.68199	3		629.2	232.9		609.6	238.3		615.9	203.7		598.4	155.4		573.2	157.2		539.8	204.5	431.05	423.95	409.8	376.9	365.2	372.15	0.851667	0.822033	0.827544	0.691983	0.739621	0.772429	3	2
comp2253149_c0_seq1|m.42245	7	545.9	593.6	149.6	587.5	642.6	141.8	483.3	531.4	134.8	566.1	668.3	176.1	571.3	594	170.6	535.1	584.4	136.7	429.7	457.3	383.167	470.167	445.3	418.733	0.849	0.886699	0.773761	0.863219	0.901843	0.869117	3	3
comp2264838_c0_seq3|m.59436	9	335.7	449.3	503.5	374.3	501.1	535.4	334.7	476.2	501.2	299.2	399.8	415.6	291.5	385.9	487.2	320.1	441.1	470.7	429.5	470.267	437.367	371.533	388.2	410.633	0.848605	0.911841	0.883212	0.68213	0.786201	0.852305	3	3
Pdu_trscr_assembly_1|10869;|m.28940	4	453.6	656	178.4	447.3	621.6	208.8	493.7	648	202.6	701.9	951.9	256.7	493.6	683	209.2	460.4	639.7	184.3	429.333	425.9	448.1	636.833	461.933	428.133	0.848275	0.825814	0.904887	1.16922	0.93553	0.888628	3	3
comp2277079_c0_seq43|m.84168	5	453.5	540.5	293.3	532.7	612.2	317.8	459.4	552.6	273.7	656.5	630.4	409.4	401.1	477	257.1	464	541.3	291.6	429.1	487.567	428.567	565.433	378.4	432.3	0.847814	0.945385	0.865442	1.03813	0.766354	0.897276	3	3
comp2276103_c0_seq11|m.81521	2	393.7	344.2	546.6	376.7	332.9	517.6	371.9	328.1	522.5	427.9	379.8	613.7	433.7	383.3	596.9	398.3	341.8	538.6	428.167	409.067	407.5	473.8	471.3	426.233	0.84597	0.793175	0.8229	0.86989	0.954499	0.884684	3	3
Pdu_trscr_assembly_1|1644;|m.62862	8	431.6	410.9	440.6	527.2	440.4	462.8	428.9	459.1	431.2	440.9	470.7	711.4	397.1	478.9	479.5	464.3	452.5	463.5	427.7	476.8	439.733	541	451.833	460.1	0.845048	0.924509	0.887991	0.993268	0.915075	0.954977	3	3
comp2275183_c0_seq3|m.79265	3	428.7		426.7	482.6		490.6	443.6		447.8	586.6		563.3	493.1		470.2	486.5		479.8	427.7	486.6	445.7	574.95	481.65	483.15	0.845048	0.943511	0.90004	1.0556	0.975461	1.00282	3	2
comp2271702_c0_seq1|m.71715	3		427.6			419.9			425.4			523.3			404.5			393.5		427.6	419.9	425.4	523.3	404.5	393.5	0.844851	0.81418	0.859047	0.960771	0.819213	0.816743	3	1
comp2277142_c0_seq6|m.84365	5	358.4	178.7	741.1	330.2	228.1	762	390.8	237.2	770.7	451.4	214.1	880.5	433.4	256.5	819.3	397.5	245.2	767.6	426.067	440.1	466.233	515.333	503.067	470.1	0.841821	0.853348	0.941505	0.946144	1.01883	0.975733	3	3
comp2243785_c0_seq1|m.32078	2	430.9	388.9	456.5	368.5	312.3	361.5	345.9	272	306.3	351.1	274	330.4	334.5	257.8	296.6	307.8	254.5	266.7	425.433	347.433	308.067	318.5	296.3	276.333	0.84057	0.673669	0.622106	0.584761	0.600081	0.573554	3	3
comp2266890_c0_seq4|m.62842	5	439.1	246.1	588.4	469.4	279.1	635.4	436.7	246.6	555.5	435.4	237.8	584.6	435.6	242.8	546.7	453.1	231.1	573.7	424.533	461.3	412.933	419.267	408.367	419.3	0.838791	0.894454	0.833872	0.769767	0.827044	0.870293	3	3
comp2278367_c1_seq1|m.88735	6	645.9		202	689		203.2	616.9		214.6	571.3		296.6	502.6		199.7	491		180.1	423.95	446.1	415.75	433.95	351.15	335.55	0.837639	0.864982	0.83956	0.796726	0.711166	0.696463	3	2
Pdu_trscr_assembly_1|21447;|m.66909	3	485.2	666.1	120.2	698.4	864	96.5	562	702.6	89.4	482.6	602.7	81.1	608.6	681.6	99	555	687.8	104.7	423.833	552.967	451.333	388.8	463.067	449.167	0.837408	1.07219	0.911416	0.713831	0.937825	0.932284	3	3
comp2260519_c0_seq10|m.52611	9	367.5	447.5	456.4	360.9	452.3	513.8	331.5	406.9	462.6	335.5	413.6	441.4	298.5	357.9	422.7	306.8	382.9	455.6	423.8	442.333	400.333	396.833	359.7	381.767	0.837343	0.857678	0.808428	0.72858	0.728482	0.79239	3	3
comp2264783_c0_seq2|m.59343	4	312.1	779.9	179.2	297.4	699.9	198.3	286.7	749.4	198.3	343.3	925.1	261	271	788.2	233.5	280.1	713.9	193.3	423.733	398.533	411.467	509.8	430.9	395.767	0.837211	0.772751	0.83091	0.935985	0.872679	0.821448	3	3
Pdu_trscr_assembly_1|21010;|m.55076	1	380.3	368.4	515.2	294.3	285.4	374.9	286.9	280.4	381	361.5	339.2	444.3	270.2	279.3	377	295.1	293.4	382.2	421.3	318.2	316.1	381.667	308.833	323.567	0.832403	0.616986	0.638328	0.700734	0.625464	0.67159	3	3
comp2277149_c0_seq1|m.84387	9	511.6	367.6	383.4	552.6	373.5	408	493.6	335.9	356.8	415.3	291.4	308.9	501.3	362.1	394.2	478.5	337.7	373.4	420.867	444.7	395.433	338.533	419.2	396.533	0.831547	0.862267	0.798533	0.621542	0.848984	0.823039	3	3
comp2263703_c0_seq1|m.57682	4	420.8			447.7			451.7			501.8			487.4			457.7			420.8	447.7	451.7	501.8	487.4	457.7	0.831415	0.868084	0.912157	0.921297	0.987106	0.949996	3	1
comp2252338_c0_seq1|m.41195	2	246	594.1		262.8	674.7		257	629		332.6	735.3		260.6	609.6		253.6	626.4		420.05	468.75	443	533.95	435.1	440	0.829933	0.9089	0.894588	0.980324	0.881185	0.913258	3	2
comp2271550_c0_seq3|m.71350	5	448.9	421.2	388.4	521.5	490	473.2	478.6	433.8	428.7	471.6	446.8	432.3	460.7	438.1	421.7	502.6	427.8	411.2	419.5	494.9	447.033	450.233	440.167	447.2	0.828847	0.959604	0.902733	0.826622	0.891447	0.928202	3	3
comp2261662_c0_seq1|m.54482	8	268.8	478.1	509.1	318.1	543	630.9	304.1	511.8	596.3	321.6	680.2	637.3	302.8	525.6	588.6	301.5	484.7	544.7	418.667	497.333	470.733	546.367	472.333	443.633	0.8272	0.964323	0.950592	1.00312	0.956592	0.920799	3	3
comp2250056_c0_seq1|m.38360	3	422.4	280.3	552.6	445.2	332.6	603.3	476.7	311.8	637.3	398.9	316.4	565.4	369.7	275.6	488.7	367	293.4	529.2	418.433	460.367	475.267	426.9	378	396.533	0.826739	0.892645	0.959747	0.783782	0.765544	0.823039	3	3
comp2253606_c0_seq2|m.42817	2	418.4			267.5			328.6			364.3			349.4			349			418.4	267.5	328.6	364.3	349.4	349	0.826673	0.518679	0.66357	0.668849	0.707622	0.724379	3	1
comp2264022_c0_seq13|m.58310	10	517.5		318.8	481.8		205.2	534.9		313.6	607.6		350.3	542.8		342	568.5		343.5	418.15	343.5	424.25	478.95	442.4	456	0.826179	0.666042	0.856725	0.879345	0.89597	0.946467	3	2
comp2262317_c0_seq2|m.55577	4	388.4	394.4	469.8	498.3	488.1	671.6	467.8	443.6	609.5	472.8	454.2	581.9	424.3	433.4	528.5	472	443.8	596.4	417.533	552.667	506.967	502.967	462.067	504.067	0.824961	1.07161	1.02376	0.923439	0.9358	1.04623	3	3
comp2275099_c0_seq1|m.79064	2		417.5			455			422.1			437.5			441.9			439.4		417.5	455	422.1	437.5	441.9	439.4	0.824895	0.882239	0.852383	0.803244	0.894957	0.912012	3	1
comp2243123_c0_seq1|m.31488	2	402.4	314.8	530.8	365.8	230.3	399.2	341.6	235.6	427.3	325.2	197.2	360.4	284.4	158.1	285.7	292	205.5	370.2	416	331.767	334.833	294.267	242.733	289.233	0.821931	0.643291	0.676158	0.540269	0.491595	0.600329	3	3
comp2138099_c0_seq1|m.6703	5	386.4	554.8	302.8	364.1	551.1	292.6	401.1	546.7	293.1	413.5	596.6	314.9	411.4	556.2	284.5	358	525.6	281.7	414.667	402.6	413.633	441.667	417.367	388.433	0.819297	0.780636	0.835285	0.810894	0.845271	0.806227	3	3
comp2275814_c0_seq6|m.80728	3		414.4			463			414.1			432.3			401.8			451.8		414.4	463	414.1	432.3	401.8	451.8	0.81877	0.897751	0.836228	0.793696	0.813745	0.93775	3	1
comp2219310_c0_seq1|m.17759	7	502.3	223	517.8	555.5	239.2	564.5	545.7	228.6	538.5	656.4	329.6	656.5	532.5	236.4	523.8	506.6	228.2	498.8	414.367	453.067	437.6	547.5	430.9	411.2	0.818704	0.87849	0.883683	1.0052	0.872679	0.853481	3	3
comp2273703_c1_seq1|m.75899	5	421.4	312.8	507.9	477.6	354.5	576.5	408.7	294.4	477.9	361.1	234.9	423.2	371.5	233	417.9	379.8	237.4	413.9	414.033	469.533	393.667	339.733	340.8	343.7	0.818046	0.910419	0.794965	0.623745	0.690205	0.713379	3	3
comp2271124_c0_seq1|m.70454	4	338.6	455	443	325.7	453	426.5	298.9	408.6	393	282.7	370.7	348.9	287.9	412.2	378.1	300.3	400.8	369.5	412.2	401.733	366.833	334.1	359.4	356.867	0.814423	0.778956	0.740778	0.613403	0.727874	0.740707	3	3
comp2277117_c1_seq4|m.84285	2	510.9	455.5	265	500.8	451.2	267.2	474	410.8	245.8	594.1	499.9	309.1	472.8	417.3	263	471.5	428	260.8	410.467	406.4	376.867	467.7	384.367	386.767	0.810999	0.788004	0.761039	0.85869	0.778438	0.802767	3	3
comp2261191_c0_seq5|m.53883	7	687.8	302.6	239.1	652	344.6	232.1	649.5	301.4	221.7	829	293.9	333.8	682.4	316.8	225	680.4	294.3	224	409.833	409.567	390.867	485.567	408.067	399.567	0.809747	0.794144	0.789311	0.891493	0.826436	0.829335	3	3
comp2275038_c0_seq3|m.78919	7	556.8	356.8	313.9	603.5	391.2	296.4	594	375	306.8	637	433.8	331.9	575.4	405.5	342.2	553.1	385.2	307	409.167	430.367	425.267	467.567	441.033	415.1	0.80843	0.834475	0.858778	0.858446	0.893202	0.861576	3	3
comp2237963_c0_seq1|m.27417	3	510.1	308.1		516	331.4		479.2	318.5		437.2	292.2		382.4	262.7		406.7	273.4		409.1	423.7	398.85	364.7	322.55	340.05	0.808298	0.821549	0.805432	0.669584	0.653244	0.705803	3	2
comp2254677_c0_seq1|m.44246	4	353.9	417.4	455.4	390.1	451.4	427.7	320.7	385.3	365.2	330.4	374.2	431.5	290.9	348.7	355.7	306.3	346.5	331.6	408.9	423.067	357.067	378.7	331.767	328.133	0.807903	0.820321	0.721055	0.695288	0.67191	0.681069	3	3
comp2275323_c0_seq2|m.79550	5	490.4	319.6	416.4	598	371.2	495.6	439.2	326.7	405.4	403.4	401.7	413.8	343	290.3	354.1	407.1	291.2	358.4	408.8	488.267	390.433	406.3	329.133	352.233	0.807706	0.946743	0.788436	0.745961	0.666577	0.731091	3	3
comp2271172_c0_seq7|m.70554	4	744.7	233.8	247	700.7	192.5	233.9	693.6	216.1	202	692.3	251.5	199.5	626.9	178.4	174.9	655.1	187.9	196.2	408.5	375.7	370.567	381.1	326.733	346.4	0.807113	0.728477	0.748317	0.699694	0.661716	0.718983	3	3
comp2257970_c0_seq2|m.48743	3	403.9	497.4	324	387.2	481.5	308.1	396.4	483.4	311.6	431.8	592.6	385.2	373.2	512.2	354.9	377.3	442	307.3	408.433	392.267	397.133	469.867	413.433	375.533	0.806981	0.7606	0.801966	0.862668	0.837305	0.779452	3	3
comp2259645_c1_seq1|m.51337	6	383.4	137.3	701	395.9	149.4	766.5	343	146.7	658.3	471.6	145	668.7	369.2	155.6	635.3	347.6	151.8	682.8	407.233	437.267	382.667	428.433	386.7	394.067	0.80461	0.847854	0.772752	0.786597	0.783163	0.817919	3	3
comp2270404_c0_seq3|m.69137	7	548.3	309.4	363.4	527	284.1	335.2	488.5	269.7	334.5	558.1	307.5	360.5	469.1	279.7	340.4	545.5	299.8	364.6	407.033	382.1	364.233	408.7	363.067	403.3	0.804215	0.740887	0.735528	0.750367	0.7353	0.837084	3	3
comp2271448_c0_seq1|m.71104	4	640.5	165.4	415.1	677.5	173	402.4	663.8	164	421.9	577.8	157.4	356.7	500.7	136	396.3	513.9	131.5	392.8	407	417.633	416.567	363.967	344.333	346.067	0.804149	0.809785	0.841209	0.668237	0.69736	0.718291	3	3
comp2275004_c0_seq1|m.78851	4	412.6	409.2	391.9	424.6	418.4	416.5	444	434.7	395.8	587.7	563.7	483	455.8	467.3	403.5	446.4	430.4	407.4	404.567	419.833	424.833	544.8	442.2	428.067	0.799341	0.814051	0.857903	1.00024	0.895565	0.888489	3	3
comp1972970_c0_seq1|m.3800	2		278.4	530.7		294.8	530.6		282.1	530		307.1	639.3		247.4	472.5		255.7	474.3	404.55	412.7	406.05	473.2	359.95	365	0.799308	0.80022	0.819972	0.868788	0.728988	0.757589	2	2
comp2276160_c0_seq4|m.81678	5	801.2	272.6	138.8	656	261.1	131.9	712.2	245.2	134	807.6	223.1	122	644.4	206.8	107.6	652.1	217.6	114.8	404.2	349.667	363.8	384.233	319.6	328.167	0.798617	0.677999	0.734653	0.705447	0.647269	0.681138	3	3
comp2275953_c1_seq2|m.81104	5	275.7	268.1	668.3	316.5	305.2	684.2	256.9	245	570.2	247.8	225.8	556.6	226.4	206.2	497.2	255	224.7	543.2	404.033	435.3	357.367	343.4	309.933	340.967	0.798288	0.844041	0.721661	0.630477	0.627692	0.707706	3	3
comp2266126_c0_seq1|m.61503	6	527	522.8	161.8	589.2	522.8	167.4	535	531.3	156.4	488.2	486.1	147.5	568.6	558.5	169.9	564.4	525	162.5	403.867	426.467	407.567	373.933	432.333	417.3	0.797958	0.826913	0.823034	0.686536	0.875582	0.866142	3	3
comp2246348_c0_seq1|m.34526	1		368.9	438.2		403.8	463.7		372.1	443.4		513.8	584.9		364.4	401.5		343.8	393.3	403.55	433.75	407.75	549.35	382.95	368.55	0.797333	0.841035	0.823405	1.0086	0.775569	0.764957	2	2
comp2258437_c0_seq2|m.49437	7	571.6	184.9	450.6	561.4	225.1	574.9	494.3	226.7	534.4	517.9	238.3	534.8	537.2	236.5	583.1	521.3	226.1	521.6	402.367	453.8	418.467	430.333	452.267	423	0.794995	0.879912	0.845046	0.790086	0.915952	0.877973	3	3
comp2251858_c0_seq1|m.40550	4	348.8	453.5		388.8	501.9		370.2	482.4		384	485.5		408.3	525.7		371.6	477.5		401.15	445.35	426.3	434.75	467	424.55	0.792591	0.863528	0.860864	0.798195	0.945791	0.88119	3	2
comp2234837_c0_seq1|m.25285	5	327.9	471.8	402.8	363.7	498.8	421.6	330.4	428	392.1	361	530.2	429.4	323	485.7	411.4	351.7	452.6	367	400.833	428.033	383.5	440.2	406.7	390.433	0.791965	0.829951	0.774435	0.808201	0.823668	0.810378	3	3
comp2224845_c0_seq4|m.20046	4	600.1	241.8	358.2	660.9	259.1	411.9	604.1	221.9	360.3	646.7	223.4	324.6	550.5	211	318.6	589	220.2	336.7	400.033	443.967	395.433	398.233	360.033	381.967	0.790384	0.860845	0.798533	0.731151	0.729157	0.792805	3	3
comp2244915_c0_seq2|m.33077	2	774.6	303.2	120	969	332.8	124.3	622.2	268.1	116.5	721.5	245.2	106.3	571.5	214.4	97.9	650.2	252.2	114.4	399.267	475.367	335.6	357.667	294.6	338.933	0.78887	0.92173	0.677706	0.656671	0.596638	0.703485	3	3
comp2277005_c0_seq3|m.83943	3	682	264.1	248.3	637.5	256.7	231.7	636.6	251	225	832	445.3	443.1	581.9	194.6	181.4	538	198.4	190.7	398.133	375.3	370.867	573.467	319.3	309.033	0.78663	0.727702	0.748923	1.05288	0.646662	0.641425	3	3
comp2253679_c0_seq3|m.42986	1			397.7			468.6			443.4			502.8			382.2			352.3	397.7	468.6	443.4	502.8	382.2	352.3	0.785774	0.908609	0.895396	0.923133	0.77405	0.731229	3	1
comp2269615_c1_seq4|m.67734	3	198.1		596	249.4		711.5	230		653.4	202.3		640.3	219.1		631.4	205.3		585.3	397.05	480.45	441.7	421.3	425.25	395.3	0.78449	0.931586	0.891963	0.773501	0.861237	0.820479	2	2
comp2271807_c0_seq1|m.71886	3	369.2	424.5		316.6	340.2		364.5	363		432.9	422.8		408	386.7		381.8	356.5		396.85	328.4	363.75	427.85	397.35	369.15	0.784095	0.636763	0.734552	0.785526	0.804732	0.766203	3	2
comp2232641_c0_seq7|m.23875	7	780.7	251.4	157.5	762.7	258.2	172.4	694.9	245.6	152.1	808	329	163.4	707.7	253.7	147.8	710.2	251.7	150.5	396.533	397.767	364.2	433.467	369.733	370.8	0.783469	0.771264	0.73546	0.795838	0.748802	0.769627	3	3
comp2268932_c0_seq1|m.66458	5	471.5	321		475.8	343.9		490.4	331.6		463.3	382.5		554	374.1		516.3	357.1		396.25	409.85	411	422.9	464.05	436.7	0.782909	0.794694	0.829968	0.776438	0.939816	0.906408	3	2
comp2273731_c0_seq3|m.75956	2	315.7	329.6	540.2	336.6	336.5	514.6	319.7	333.1	507.5	359.9	365.1	571.3	305.4	313.7	477	309.7	301.5	482.2	395.167	395.9	386.767	432.1	365.367	364.467	0.780769	0.767645	0.781031	0.793329	0.739958	0.756482	3	3
comp2199259_c0_seq2|m.12786	3			394.7			440.3			407.4			469.6			390.2			423.2	394.7	440.3	407.4	469.6	390.2	423.2	0.779847	0.853736	0.822698	0.862179	0.790252	0.878388	3	1
comp2258349_c0_seq1|m.49321	6	361.6	393.4	426.8	456.1	456.9	515.7	361.8	410.7	435	313.7	444.3	423.6	307.1	405.1	456.8	394.9	451.3	479.7	393.933	476.233	402.5	393.867	389.667	441.967	0.778332	0.92341	0.812803	0.723133	0.789172	0.91734	3	3
comp2266945_c0_seq1|m.62921	2	375.4		411.8	378.2		441.3	420.8		460	443.9		420.9	411.4		443.4	337.2		395.2	393.6	409.75	440.4	432.4	427.4	366.2	0.777673	0.7945	0.889338	0.79388	0.865591	0.76008	3	2
comp2249438_c1_seq1|m.37675	1	430.7	406.4	342.5	496.5	497.1	366.7	402.1	384.8	303.3	462.9	435.4	354.7	429.1	414.3	324.1	398.9	402.9	297.4	393.2	453.433	363.4	417.667	389.167	366.4	0.776883	0.879201	0.733845	0.76683	0.788159	0.760495	3	3
comp2257487_c0_seq1|m.48064	5	393.5	460.9	325.1	392.8	463.8	376.1	379.4	456.4	353.6	367	443.3	378.4	357.1	445.1	361.1	381.2	450.6	353	393.167	410.9	396.467	396.233	387.767	394.933	0.776817	0.79673	0.800619	0.727479	0.785324	0.819718	3	3
comp2250699_c0_seq1|m.39223	5	544.2	150.9	481.5	512.1	163.1	474.7	551.6	159.5	450.2	603.6	170	548.2	504.1	131	444.6	452.4	145.5	458.6	392.2	383.3	387.1	440.6	359.9	352.167	0.774907	0.743214	0.781704	0.808935	0.728887	0.730952	3	3
comp2272433_c0_seq1|m.73197	4	148.4	711.6	316.2	152	742.4	357.5	130.7	643.6	274.9	152	767.3	294.7	136.9	672.2	288	137.2	688.1	288.1	392.067	417.3	349.733	404.667	365.7	371.133	0.774644	0.809139	0.706247	0.742962	0.740633	0.770319	3	3
comp2267356_c1_seq8|m.63690	3			392			455.4			406.7			391.3			369			350.2	392	455.4	406.7	391.3	369	350.2	0.774512	0.883014	0.821284	0.718421	0.747317	0.72687	3	1
comp2272351_c0_seq1|m.73019	5	339.5	479.6	353.9	389.9	539.2	408.4	410.2	552.6	449.2	502.9	744.9	572	392.4	531	397.7	385	529.5	412.4	391	445.833	470.667	606.6	440.367	442.3	0.772536	0.864465	0.950458	1.11371	0.891852	0.918032	3	3
comp2278060_c0_seq5|m.87406	8	404.5	376.9		405.6	383.4		415.1	392.8		498.5	437.5		468.2	394.7		422	394.4		390.7	394.5	403.95	468	431.45	408.2	0.771944	0.76493	0.815731	0.859241	0.873793	0.847254	3	2
comp2261945_c0_seq4|m.54969	5	428.5	344.8	398.4	329.2	289.9	325.6	303.6	256.6	274.9	353.8	304.8	339.2	309.3	270	314.6	280.7	241.6	251.8	390.567	314.9	278.367	332.6	297.967	258.033	0.77168	0.610587	0.56213	0.610649	0.603456	0.53557	3	3
comp2275277_c0_seq1|m.79443	4	298.9		482.1	287.5		484.6	287.3		506.4	358.9		631.2	311.4		587.5	262.6		494.2	390.5	386.05	396.85	495.05	449.45	378.4	0.771549	0.748546	0.801393	0.908905	0.910248	0.785402	3	2
comp2251943_c0_seq1|m.40684	4	360.3	420.1		362	378.2		332.4	375.1		443.7	418.2		342.5	392.6		327.5	374.5		390.2	370.1	353.75	430.95	367.55	351	0.770956	0.717619	0.714358	0.791218	0.74438	0.728531	3	2
comp2248291_c0_seq1|m.36455	3	95.1		684.7	109.7		697.4	94.3		594.3	86.2		634.9	93.6		551.6	95.6		586.9	389.9	403.55	344.3	360.55	322.6	341.25	0.770363	0.782478	0.695275	0.661965	0.653345	0.708294	3	2
comp2260184_c0_seq3|m.52107	1			389.9			357.3			390.9			465.1			368			361.7	389.9	357.3	390.9	465.1	368	361.7	0.770363	0.6928	0.789378	0.853917	0.745291	0.750739	1	1
comp2263887_c0_seq1|m.58047	7	538	298.1	332.3	644.3	332.5	390.4	597.4	339.3	365.9	583.6	396.5	407	573.4	354.8	362.6	562.2	325.5	324.7	389.467	455.733	434.2	462.367	430.267	404.133	0.769507	0.883661	0.876817	0.848898	0.871397	0.838813	3	3
comp2266675_c0_seq1|m.62468	3	330.8	467.4	369.4	318.6	427.7	354.6	357.9	466.9	387.1	546	744.4	597.3	493.6	669.3	543.4	419.1	542.5	453.4	389.2	366.967	403.967	629.233	568.767	471.667	0.76898	0.711543	0.815765	1.15526	1.15189	0.978985	3	3
comp2270845_c1_seq1|m.69967	5	219.6	662.7	284.5	225.7	664.9	282.1	245.3	665.6	307.3	284.1	935.4	333.3	260.4	710.7	323.5	227.2	691.9	298.3	388.933	390.9	406.067	517.6	431.533	405.8	0.768453	0.75795	0.820005	0.950306	0.873962	0.842273	3	3
comp1979420_c0_seq1|m.3907	8	348.8	428	389	419.7	524	456.4	397.8	463.8	437.1	389.7	421.5	426.8	385.1	419.3	434.5	387	467.8	411.1	388.6	466.7	432.9	412.667	412.967	421.967	0.767795	0.904925	0.874192	0.75765	0.83636	0.875828	3	3
comp2269417_c0_seq1|m.67372	2	323.9	303.3	536.5	295.2	272.2	484.8	259.4	234.9	437.2	320.7	297.1	597.7	257.4	261.1	523.8	273.2	257.8	507.2	387.9	350.733	310.5	405.167	347.433	346.067	0.766411	0.680067	0.627019	0.74388	0.703639	0.718291	3	3
comp2253401_c0_seq1|m.42579	7	238.4	266.2	653.9	261.6	289.2	715.3	235.8	253.1	650.2	268.2	236.5	803.6	231.8	228.7	659.6	235.6	303.3	660.2	386.167	422.033	379.7	436.1	373.367	399.7	0.762987	0.818317	0.766761	0.800673	0.75616	0.829612	3	3
Pdu_trscr_assembly_1|11647;|m.68633	3	270.2	585.4	302.2	297.5	635.5	298.4	294.4	635	307.7	337.7	730	319.9	311.1	609	348.1	307.3	605.8	321.5	385.933	410.467	412.367	462.533	422.733	411.533	0.762526	0.795889	0.832728	0.849204	0.85614	0.854173	3	3
comp2275880_c0_seq2|m.80909	8	409.6	120.8	626	400	125.1	662	402.1	115.8	625	419.5	137	720.9	358.3	107.9	523.6	370	108.1	546.3	385.467	395.7	380.967	425.8	329.933	341.467	0.761604	0.767257	0.769319	0.781763	0.668197	0.708743	3	3
comp2263836_c0_seq1|m.57965	4	165.4	506.5	484.4	148.4	526	485.1	156.6	511.1	479.6	213.2	657.9	574.5	168.7	565.3	511.1	151.7	575.8	540.8	385.433	386.5	382.433	481.867	415.033	422.767	0.761538	0.749418	0.772281	0.8847	0.840545	0.877489	3	3
comp2277597_c1_seq1|m.85805	4	533.9	323.1	297.2	610.2	334.6	313.6	560.9	332.2	299.8	734.7	392.9	373.6	622.7	351.5	328.7	644.3	315.8	303.6	384.733	419.467	397.633	500.4	434.3	421.233	0.760155	0.81334	0.802975	0.918727	0.879565	0.874306	3	3
comp2141952_c0_seq1|m.7380	3		384.4			402.8			368.1			350.8			359.9			363.3		384.4	402.8	368.1	350.8	359.9	363.3	0.759496	0.781024	0.743336	0.644064	0.728887	0.75406	3	1
comp2243000_c0_seq1|m.31424	9	374.9	521.3	256.6	432.1	548	277.2	359.1	485.8	266.2	387.4	549.2	235.1	348.4	470.4	239.4	337.2	485.7	256.1	384.267	419.1	370.367	390.567	352.733	359.667	0.759233	0.812629	0.747913	0.717075	0.714373	0.746519	3	3
comp2278077_c0_seq3|m.87468	5	258.9	514.6	376.6	200.7	629.9	320.1	238.5	519.5	355.7	325.7	565.3	428.1	303.6	509.9	391.7	242.7	510.7	351.2	383.367	383.567	371.233	439.7	401.733	368.2	0.757455	0.743731	0.749663	0.807283	0.81361	0.764231	3	3
comp2251806_c0_seq1|m.40480	6	212	595.7	342.4	219.5	622.8	347.3	208.2	566.5	310.8	168.5	590.8	315.4	197.4	506.2	258.1	202.7	535.5	281.2	383.367	396.533	361.833	358.233	320.567	339.8	0.757455	0.768873	0.730681	0.657711	0.649227	0.705284	3	3
comp2270221_c0_seq2|m.68777	4	383.2			386			430.1			487.2			409.3			385.5			383.2	386	430.1	487.2	409.3	385.5	0.757125	0.748449	0.868538	0.894492	0.828934	0.800138	3	1
comp2277446_c0_seq33|m.85285	5	214.7	633.1	300.8	249.7	727.6	392.1	230.2	643	330.8	169.9	603.6	289.4	232.4	674.6	309.4	197.1	618.5	272.4	382.867	456.467	401.333	354.3	405.467	362.667	0.756467	0.885083	0.810447	0.65049	0.821171	0.752746	3	3
comp2259823_c0_seq1|m.51564	2	328.1	430	390.2	297.6	386.5	353.1	271.7	359.9	328.5	277.2	371.9	358.5	223.8	331	287.1	235.4	324.4	293.5	382.767	345.733	320.033	335.867	280.633	284.433	0.756269	0.670372	0.646271	0.616646	0.568352	0.590366	3	3
comp2265425_c0_seq3|m.60356	6	370.4	457.9	318.8	447.8	581.7	356.6	447.8	567.2	348.9	1128	870.9	336.5	459.2	618.7	351.2	437.3	581.9	348.8	382.367	462.033	454.633	778.467	476.367	456	0.755479	0.895876	0.91808	1.42925	0.964761	0.946467	3	3
comp2260960_c0_seq2|m.53456	2	481.8	430	234.7	550.5	511.5	281.2	546.6	509	265.9	555.3	511	222.7	619	593.1	273	541.1	502.3	253.1	382.167	447.733	440.5	429.667	495.033	432.167	0.755084	0.868149	0.88954	0.788862	1.00257	0.896999	3	3
comp2273281_c1_seq10|m.75022	5	291.1	363.8	490	333.8	388.6	498.9	299.8	357.7	496.1	328.2	378	503.8	315.1	370.2	485.1	303.2	349.6	498.7	381.633	407.1	384.533	403.333	390.133	383.833	0.75403	0.789361	0.776521	0.740514	0.790117	0.796679	3	3
comp2275033_c0_seq1|m.78909	6	483.6	215.2	446	510.3	237.4	465.6	511.6	228.1	471.2	614.3	296.2	580.4	524.8	243.5	474	493.4	217.6	442.4	381.6	404.433	403.633	496.967	414.1	384.467	0.753964	0.784191	0.815092	0.912424	0.838655	0.797994	3	3
Pdu_trscr_assembly_1|20520;|m.39570	3	602.3	183.4	356.8	592.4	161.8	352.3	571.3	159.4	346.2	756.9	203.9	487	647.4	182.1	389.4	605.8	175.2	331	380.833	368.833	358.967	482.6	406.3	370.667	0.752449	0.715163	0.724892	0.886047	0.822858	0.769351	3	3
comp2275067_c0_seq2|m.78988	1		380.2			331.6			355			326			280.9			303.4		380.2	331.6	355	326	280.9	303.4	0.751198	0.642968	0.716882	0.598531	0.568892	0.629733	3	1
comp2258879_c1_seq1|m.50060	7	621.7	285.4	231.3	674.6	309.1	282.7	602.3	282.2	255.1	652.3	313.9	266.2	590.6	296.3	259.9	579.1	282.7	265.2	379.467	422.133	379.867	410.8	382.267	375.667	0.749749	0.818511	0.767097	0.754223	0.774185	0.779728	3	3
comp2204427_c0_seq1|m.13679	1	590.9	296.8	250.3	567.9	287.8	228.6	537.9	258.8	227.8	568.1	277.7	251.8	580.6	265.7	276.2	560.1	278.3	255.3	379.333	361.433	341.5	365.867	374.167	364.567	0.749485	0.700814	0.68962	0.671726	0.75778	0.756689	3	3
Pdu_trscr_assembly_1|17077;|m.63217	5	530	280.7	325.8	503.9	280.2	308.1	468.6	234.4	285.3	463.7	238.8	292.4	451.1	226.8	258.8	464.2	236.5	296.2	378.833	364.067	329.433	331.633	312.233	332.3	0.748498	0.70592	0.665253	0.608874	0.63235	0.689717	3	3
comp2230991_c0_seq2|m.22936	1	367.2		390.1	396.6		430.8	428.5		441.6	426.5		472.5	399.6		435	354.9		372.8	378.65	413.7	435.05	449.5	417.3	363.85	0.748135	0.802159	0.878534	0.825275	0.845136	0.755202	3	2
comp2274121_c0_seq4|m.76896	7	335.9	651.5	145.6	414.4	671.6	104.3	374.5	605	80.2	365	661.7	123.1	349.9	578.6	89.9	362.1	566	78.1	377.667	396.767	353.233	383.267	339.467	335.4	0.746192	0.769325	0.713314	0.703672	0.687504	0.696152	3	3
comp1949817_c0_seq2|m.3432	3	285.2		469.4	288.7		422.9	320.1		490.4	208		298.3	248.7		392.8	256.7		422.6	377.3	355.8	405.25	253.15	320.75	339.65	0.745468	0.689891	0.818356	0.46478	0.649598	0.704973	3	2
comp2260477_c0_seq3|m.52508	5	122.1	428.8	580.8	128.5	392.2	565.1	126.8	407.4	583.9	127.7	357.1	514.3	141.7	373.5	516.1	133.1	396.2	540.5	377.233	361.933	372.7	333.033	343.767	356.6	0.745336	0.701784	0.752625	0.611444	0.696213	0.740154	3	3
comp2254338_c0_seq1|m.43864	3	486.5	485.8	159.3	422.4	441.3	158.2	433.4	442.1	158.3	437	403.4	194.9	368.9	370.4	152.4	412.5	379.9	135.7	377.2	340.633	344.6	345.1	297.233	309.367	0.74527	0.660483	0.69588	0.633599	0.601971	0.642117	3	3
comp2275022_c0_seq1|m.78889	2		213.2	536.7		194.1	479.5		166.3	455.2		191.6	554.9		173.9	476.5		178	480.2	374.95	336.8	310.75	373.25	325.2	329.1	0.740825	0.653051	0.627524	0.685282	0.658611	0.683075	3	2
comp2271895_c0_seq9|m.72087	2		309.2	440.2		333.2	461.3		305.9	434.2		384.8	533.4		327.3	493.9		308.2	457.7	374.7	397.25	370.05	459.1	410.6	382.95	0.740331	0.770262	0.747274	0.842901	0.831567	0.794846	3	2
comp2140114_c0_seq1|m.7072	3		291.6	457.1		328.1	539.7		298.9	492.6		324.4	507.8		320.7	508.2		322.9	512.7	374.35	433.9	395.75	416.1	414.45	417.8	0.739639	0.841326	0.799172	0.763953	0.839364	0.86718	3	2
comp2257306_c0_seq3|m.47794	2			372			352			339.5			300.6			324.4			253.8	372	352	339.5	300.6	324.4	253.8	0.734996	0.682523	0.685582	0.551897	0.65699	0.526784	1	1
comp2268272_c0_seq1|m.65344	7		107.4	635.1		137.2	650.6		130	650.1		118.3	766.5		125.4	708.1		132.5	684.2	371.25	393.9	390.05	442.4	416.75	408.35	0.733514	0.763767	0.787662	0.81224	0.844022	0.847566	3	2
comp2280464_c0_seq1|m.91227	3		328.4	413.4		332.3	426		300.5	394.3		291.5	370.8		248.3	316.9		255.1	326	370.9	379.15	347.4	331.15	282.6	290.55	0.732823	0.735167	0.701535	0.607987	0.572335	0.603061	3	2
comp2269431_c0_seq2|m.67390	1	384.1	357.5		383	362.4		363.7	338.8		462.5	438.7		376	343.2		360.5	345.1		370.8	372.7	351.25	450.6	359.6	352.8	0.732625	0.72266	0.709309	0.827295	0.728279	0.732267	2	2
Pdu_trscr_assembly_1|16296;|m.13041	5	333.8	470.9	307	300.5	402.5	228.9	244.1	352.5	231.1	246.5	358.4	254	172.4	264.7	164.5	238.5	334.7	217.8	370.567	310.633	275.9	286.3	200.533	263.667	0.732164	0.602314	0.557149	0.525643	0.40613	0.547263	3	3
comp2276913_c0_seq6|m.83709	2	391.2		349.7	366.8		338.5	364.5		335.5	452.9		406.2	426.5		343.8	356		325.1	370.45	352.65	350	429.55	385.15	340.55	0.731934	0.683784	0.706785	0.788647	0.780024	0.706841	3	2
comp2271934_c0_seq1|m.72155	2	332.2	567.8	209	354	650.6	240.3	321.2	568.7	205	335.4	639.3	228.8	356.2	629.3	216.7	322.1	610.8	222.1	369.667	414.967	364.967	401.167	400.733	385	0.730386	0.804615	0.737009	0.736536	0.811584	0.799101	3	3
comp2281072_c0_seq1|m.91245	2	362	376.6		326.7	349.9		310.6	337		268.5	290.3		239.6	273.6		245	281.9		369.3	338.3	323.8	279.4	256.6	263.45	0.729662	0.655959	0.653877	0.512974	0.519679	0.546813	3	2
comp2274815_c0_seq4|m.78395	5		416.1	322.4		503.4	380.7		512.1	384.6		452.3	393.5		469	341.3		421.9	315.2	369.25	442.05	448.35	422.9	405.15	368.55	0.729563	0.857129	0.905392	0.776438	0.820529	0.764957	3	2
comp2275114_c0_seq6|m.79101	3			369.1			355.5			357.5			466.3			370.5			376.8	369.1	355.5	357.5	466.3	370.5	376.8	0.729266	0.68931	0.721931	0.85612	0.750354	0.782081	3	1
comp2273399_c0_seq10|m.75254	7	412.8	229.7	463.9	351.6	164	367.8	383.2	196.5	391.1	430.7	245.8	451.4	409	239.7	412.7	371.5	207	378.9	368.8	294.467	323.6	375.967	353.8	319.133	0.728674	0.570967	0.653473	0.690269	0.716533	0.662389	3	3
comp2273826_c0_seq4|m.76159	1			368.8			385.3			407.2			430.1			418.4			376.4	368.8	385.3	407.2	430.1	418.4	376.4	0.728674	0.747092	0.822294	0.789657	0.847364	0.781251	2	1
comp2272272_c1_seq2|m.72850	3		265	472.3		235.5	418.6		241	422.3		243.7	415		216.9	405.6		230.4	403.3	368.65	327.05	331.65	329.35	311.25	316.85	0.728377	0.634146	0.669729	0.604682	0.630358	0.657649	3	2
comp2269937_c0_seq1|m.68261	2	245.8	289.2	570.2	228.5	271.5	539.5	241.6	283.1	552.5	281.6	350	627	240.8	285.7	561.4	222.1	281.4	538.5	368.4	346.5	359.067	419.533	362.633	347.333	0.727883	0.671859	0.725094	0.770257	0.734422	0.72092	3	3
comp2270534_c0_seq1|m.69382	7	407.9	317.6	379.5	396	290.9	342	360.8	306.7	301.6	460.5	382.8	367.6	363.4	343.7	345	368.7	326.9	351.3	368.333	342.967	323.033	403.633	350.7	348.967	0.727752	0.665008	0.652329	0.741065	0.710255	0.72431	3	3
comp2138058_c0_seq1|m.6692	1	354		382.6	238.2		248.3	267		275.2	270.5		301.3	258.3		296.8	263.8		305.6	368.3	243.25	271.1	285.9	277.55	284.7	0.727686	0.471658	0.547456	0.524908	0.562108	0.590919	2	2
comp2277269_c1_seq4|m.84738	2	443.9	292.2	368.7	446.4	303.7	367.5	440.6	300.7	375.4	517.1	338.9	468.3	530.8	342.7	479.1	429.9	305.1	375	368.267	372.533	372.233	441.433	450.867	370	0.72762	0.722337	0.751683	0.810465	0.913117	0.767967	3	3
comp2277041_c0_seq11|m.84050	3	465	285.1	352.6	491.2	319.3	409.1	410.3	237	307.5	428.4	229.7	294.4	376.2	194.4	247.3	405.6	231.1	312.1	367.567	406.533	318.267	317.5	272.633	316.267	0.726237	0.788263	0.642703	0.582925	0.55215	0.656439	3	3
comp2270385_c0_seq11|m.69105	4	151.7	681.8	268.4	154.6	650.5	276.4	165.7	666.1	266.7	161.2	718.7	261	154	682.9	259.3	143.7	624.5	239.5	367.3	360.5	366.167	380.3	365.4	335.9	0.72571	0.699005	0.739432	0.698225	0.740026	0.697189	3	3
comp2278037_c0_seq3|m.87323	5	425.4	310.1	366.3	454.3	296.1	384.7	434.9	319.6	367.9	482.4	372.6	435.6	461.7	331.3	400.5	440.4	295.2	352.2	367.267	378.367	374.133	430.2	397.833	362.6	0.725644	0.733648	0.75552	0.789841	0.805711	0.752607	3	3
comp2277665_c0_seq3|m.86020	2		366.1			366.2			354.7			430.1			336.7			357.5		366.1	366.2	354.7	430.1	336.7	357.5	0.723339	0.710057	0.716276	0.789657	0.681901	0.742022	1	1
comp2272065_c0_seq2|m.72414	1			365.9			374.8			363.9			439.8			368.5			373.8	365.9	374.8	363.9	439.8	368.5	373.8	0.722944	0.726732	0.734855	0.807466	0.746304	0.775854	3	1
comp2271113_c0_seq5|m.70438	2	145.8	652.7	297.5	145	669.3	303.9	141.7	693.7	331.5	126	792.5	342	122	757	333.2	108.1	655.9	289.3	365.333	372.733	388.967	420.167	404.067	351.1	0.721824	0.722725	0.785474	0.77142	0.818335	0.728738	3	3
comp2275311_c0_seq1|m.79516	1		365			403.5			396			473			392.2			376.6		365	403.5	396	473	392.2	376.6	0.721166	0.782381	0.799677	0.868421	0.794302	0.781666	2	1
comp2270221_c0_seq2|m.68778	2		331	397.6		341.4	410		320.6	372.7		309.1	368.7		321	363.5		324.9	358.1	364.3	375.7	346.65	338.9	342.25	341.5	0.719783	0.728477	0.70002	0.622215	0.693141	0.708813	2	2
comp2264123_c0_seq2|m.58462	3		362.6			367			370.2			450.2			420.7			361.4		362.6	367	370.2	450.2	420.7	361.4	0.716424	0.711608	0.747577	0.826561	0.852022	0.750117	2	1
comp2272435_c0_seq2|m.73201	8	599.8	94.5	392.1	701.1	121.8	445.8	649.9	104.5	412.9	736.4	114.7	433.6	701.8	119	416.6	682.2	108.6	371.6	362.133	422.9	389.1	428.233	412.467	387.467	0.715502	0.819997	0.785743	0.78623	0.835347	0.80422	3	3
comp2262845_c0_seq1|m.56398	3	268.3	408.6	408.3	285.8	424.1	407.3	254.7	401.4	418.2	261.4	378.1	390.3	260.4	415.4	416.3	259.5	387.5	407.8	361.733	372.4	358.1	343.267	364.033	351.6	0.714711	0.722079	0.723142	0.630233	0.737258	0.729776	3	3
comp2246889_c0_seq8|m.35051	5	657.2	360.2	65.3	653.6	319.1	93.3	683.1	296.6	97.3	715.4	401.5	80.2	636	284.8	80.8	605.3	278	78.2	360.9	355.333	359	399.033	333.867	320.5	0.713065	0.688987	0.72496	0.732619	0.676163	0.665225	3	3
comp2266220_c0_seq6|m.61644	4		360.9			377.7			374.2			516			370			366.6		360.9	377.7	374.2	516	370	366.6	0.713065	0.732355	0.755654	0.947368	0.749342	0.76091	3	1
comp2272165_c0_seq8|m.72618	4		490.2	231.4		322.2	202.6		323.5	191.8		415.7	227		328.1	184.8		312.7	202.1	360.8	262.4	257.65	321.35	256.45	257.4	0.712867	0.50879	0.520295	0.589994	0.519375	0.534256	3	2
comp2274260_c1_seq7|m.77225	3	391.6	310.4	379.5	444	335.3	438.1	392.1	300.7	372.4	323.3	240.9	311	363.4	298.2	362.6	391	314.7	385.9	360.5	405.8	355.067	291.733	341.4	363.867	0.712275	0.786841	0.717017	0.535618	0.69142	0.755237	3	3
comp2275036_c0_seq6|m.78916	4	352.4	390.8	336.1	360.9	376.3	325.7	357.1	378.6	364.2	386	386.7	363.6	354.9	365.9	348.6	353	344.1	332.7	359.767	354.3	366.633	378.767	356.467	343.267	0.710826	0.686983	0.740374	0.69541	0.721933	0.712479	3	3
comp2264129_c0_seq1|m.58470	3	542.2	216.3	319.8	555.9	229.9	324.6	505.5	213.5	298.5	532.6	226.5	340.5	475.4	203.2	292.1	457.1	186.8	279.6	359.433	370.133	339.167	366.533	323.567	307.833	0.710167	0.717684	0.684908	0.67295	0.655303	0.638935	3	3
comp2276388_c0_seq2|m.82248	1			358.5			422.4			369.6			408.6			352			385.4	358.5	422.4	369.6	408.6	352	385.4	0.708323	0.819028	0.746365	0.750184	0.712887	0.799931	1	1
comp2272285_c0_seq1|m.72875	3	404.9	205.2	464.9	437	247.5	507.4	431.4	231	519.2	473	275.3	572.1	500.5	282.3	591.2	430.2	232.4	497.7	358.333	397.3	393.867	440.133	458	386.767	0.707994	0.770359	0.795369	0.808078	0.927564	0.802767	3	3
comp2273272_c1_seq15|m.75005	8	50.2	195.6	827.3	67.8	250.2	794.9	56	232.8	788	60.2	203.4	872.9	58.6	217	789.8	61.8	210.3	752.2	357.7	370.967	358.933	378.833	355.133	341.433	0.706742	0.719299	0.724825	0.695532	0.719233	0.708674	3	3
comp2278204_c0_seq4|m.88028	3	357			338.9			326.5			348.9			371.5			341.1			357	338.9	326.5	348.9	371.5	341.1	0.705359	0.657123	0.65933	0.640575	0.75238	0.707982	3	1
comp2274161_c0_seq2|m.77001	3	221.8	462.1	387	203.4	431.6	391.2	185.9	422.8	366.7	200.1	469.2	335.3	177.8	419.3	312	208	430.6	371.4	356.967	342.067	325.133	334.867	303.033	336.667	0.705293	0.663263	0.65657	0.61481	0.613718	0.698781	3	3
comp2276830_c0_seq8|m.83455	6	184.2	417	467.7	494.7	904	1093.9	641.1	1030.9	1383.6	263.1	566.4	633.9	215.5	447.6	477.8	195.5	451.2	508.6	356.3	830.867	1018.53	487.8	380.3	385.1	0.703976	1.61104	2.05681	0.895594	0.770202	0.799308	3	3
comp2239626_c0_seq1|m.28502	3	359.7	332.4	376.4	373.7	352.8	446.8	347.7	367	404	358.2	396.8	398.1	344.8	360.2	400.5	353	353.3	420	356.167	391.1	372.9	384.367	368.5	375.433	0.703713	0.758338	0.753029	0.705692	0.746304	0.779244	3	3
comp2269307_c0_seq1|m.67193	3			355.8			357.1			334			383.5			333.6			299.9	355.8	357.1	334	383.5	333.6	299.9	0.702988	0.692412	0.674475	0.7041	0.675623	0.622468	3	1
comp2263830_c2_seq16|m.57960	2		329.1	381.1		311.1	373.2		334.3	394		400.6	433.6		302.4	341.7		289.3	304.3	355.1	342.15	364.15	417.1	322.05	296.8	0.701605	0.663424	0.735359	0.765789	0.652231	0.616034	2	2
comp2271979_c0_seq2|m.72240	2	263.2		446	342.5		514.5	331.9		534.1	313.2		535.6	297.5		527.8	301.6		521.7	354.6	428.5	433	424.4	412.65	411.65	0.700617	0.830856	0.874394	0.779192	0.835719	0.854415	3	2
comp2264612_c0_seq5|m.59122	2	354.4			322.9			278.7			408.6			320.9			305.3			354.4	322.9	278.7	408.6	320.9	305.3	0.700222	0.626099	0.562803	0.750184	0.649902	0.633676	1	1
comp2274661_c0_seq3|m.78088	2		473.2	234.7		545.8	285.4		549.6	272.4		668	331.5		591.3	321.7		490.6	255.5	353.95	415.6	411	499.75	456.5	373.05	0.699333	0.805843	0.829968	0.917534	0.924526	0.774297	2	2
comp2269611_c0_seq1|m.67728	9	232.4	631.3	196.6	270.1	742.2	219.5	256.1	669.1	220.1	219.1	693.8	237.9	284.6	728.9	250.7	292.5	689	235.1	353.433	410.6	381.767	383.6	421.4	405.533	0.698312	0.796148	0.770934	0.704284	0.85344	0.841719	3	3
comp2261383_c0_seq1|m.54137	6	520	323.5	215.7	535.6	320	252.2	493.7	292.9	240.2	530.2	295.4	246.2	511	289.3	213.3	463.8	289.7	227	353.067	369.267	342.267	357.267	337.867	326.833	0.697588	0.716003	0.691169	0.655936	0.684264	0.678371	3	3
comp2273969_c0_seq1|m.76528	14	606.3	86.9	365.4	667.3	121.3	440.4	616.9	99.8	395.2	677.2	102.3	402.4	622.7	103.9	430.3	607.8	90.4	401.7	352.867	409.667	370.633	393.967	385.633	366.633	0.697193	0.794338	0.748452	0.723317	0.781003	0.760979	3	3
comp2259146_c0_seq1|m.50588	3	464.7	192.4	401.5	596.9	209.4	523.6	503.7	192	411.7	510	191.8	409.4	425.3	173.9	369.8	493.2	185.8	428.9	352.867	443.3	369.133	370.4	323	369.3	0.697193	0.859553	0.745423	0.680049	0.654155	0.766514	3	3
comp2277680_c0_seq25|m.86056	7	182.6	631.5	243.2	244.2	713.8	343.2	202.2	691.5	279.5	202.9	771.5	256.5	232.8	745.1	321.7	240.1	731.1	304.3	352.433	433.733	391.067	410.3	433.2	425.167	0.696337	0.841003	0.789715	0.753305	0.877337	0.88247	3	3
comp2269843_c0_seq2|m.68107	5	192.4		511.3	191.3		535.6	181.2		525.7	200		561.3	189.6		525.2	187.6		507.8	351.85	363.45	353.45	380.65	357.4	347.7	0.695184	0.704725	0.713752	0.698868	0.723824	0.721681	3	2
comp2266512_c0_seq8|m.62145	2	314.6		388.2	349.9		413	327.7		379.9	343.5		386.1	270.8		295.6	281		331	351.4	381.45	353.8	364.8	283.2	306	0.694295	0.739626	0.714459	0.669767	0.57355	0.635129	3	2
comp2238188_c0_seq1|m.27576	3	410.5	305.2	336.3	335.3	255.9	290.1	298	238.4	262.4	203.5	208.5	211.7	280.7	249	267	336.1	273.2	312.3	350.667	293.767	266.267	207.9	265.567	307.2	0.692846	0.56961	0.537695	0.381701	0.537838	0.63762	3	3
comp2247483_c0_seq2|m.35645	4	444.4	490.5	115	459.1	518.5	128	431.7	499.8	119.1	425.9	458.5	123.6	407.3	442.5	105.4	424.8	459.5	107.2	349.967	368.533	350.2	336	318.4	330.5	0.691463	0.714581	0.707189	0.616891	0.644839	0.685981	3	3
comp2262720_c0_seq1|m.56199	6	155.9	438.4	455.4	216.4	560.6	578	230.2	536.8	570.6	298.9	659.2	764.2	297.1	612.2	678.5	250.2	594	654.1	349.9	451.667	445.867	574.1	529.267	499.433	0.691331	0.875776	0.900377	1.05404	1.0719	1.03662	3	3
comp2269667_c1_seq1|m.67808	4		307.4	389.5		277.5	341.9		280	354.5		275.4	341.4		260.2	298.4		228.5	258.3	348.45	309.7	317.25	308.4	279.3	243.4	0.688466	0.600504	0.64065	0.566218	0.565652	0.505198	3	2
comp2275799_c1_seq1|m.80666	5	299.4	438.3	306.3	300.1	427.3	307.7	302.7	440.7	312.9	381.4	538.5	368.7	306.1	468.8	328.2	275.3	426.6	298.7	348	345.033	352.1	429.533	367.7	333.533	0.687577	0.669015	0.711026	0.788617	0.744684	0.692277	3	3
comp2274954_c0_seq7|m.78719	3	245.9	524	272.1	239.3	513.7	283.3	241.7	521.3	266.7	273.6	719.4	296.8	262.9	585.5	294.6	251.4	562.1	282.8	347.333	345.433	343.233	429.933	381	365.433	0.68626	0.669791	0.693121	0.789351	0.77162	0.758488	3	3
comp2263456_c1_seq2|m.57334	1		379.1	315		393.5	348.1		362	309.5		570.3	570.3		382.5	326.6		356.1	309.1	347.05	370.8	335.75	570.3	354.55	332.6	0.6857	0.718976	0.678009	1.04706	0.718052	0.69034	3	2
comp2004487_c0_seq1|m.4269	3	315.9	512.7	212.5	357.2	603.7	276.8	296.9	492.9	210	218.6	383.3	126.1	223.7	371	120.4	249	426.5	168.4	347.033	412.567	333.267	242.667	238.367	281.3	0.685667	0.799961	0.672994	0.445532	0.482752	0.583862	3	3
Pdu_trscr_assembly_1|4312;|m.46729	7	201.4	471.6	366.3	240.7	522.2	401.4	214.7	471.2	379	219.7	506.2	447	223.2	472.4	371.5	221.4	472.7	369.8	346.433	388.1	354.967	390.967	355.7	354.633	0.684482	0.752521	0.716815	0.717809	0.720381	0.736072	3	3
comp2237451_c1_seq1|m.27018	3	330	362.2		379.2	395.6		367.7	394.1		405.6	435.5		330.5	369.1		348	348		346.1	387.4	380.9	420.55	349.8	348	0.683823	0.751163	0.769184	0.772124	0.708432	0.722304	3	2
comp2254371_c0_seq1|m.43907	3			345.8			378.1			414.9			483			452.7			407.4	345.8	378.1	414.9	483	452.7	407.4	0.68323	0.733131	0.837843	0.886781	0.91683	0.845594	3	1
comp2264505_c0_seq2|m.58982	2		359.2	332.1		320	316.6		345.3	320.4		425.5	409.2		348.3	314.7		357.6	331.7	345.65	318.3	332.85	417.35	331.5	344.65	0.682934	0.617179	0.672153	0.766248	0.67137	0.715351	3	2
comp2254503_c0_seq2|m.44040	2	315.9		375.1	305.6		389.1	404.6		513.2	322.2		345.3	293.9		321.2	270.7		298.6	345.5	347.35	458.9	333.75	307.55	284.65	0.682638	0.673507	0.926696	0.61276	0.622865	0.590816	3	2
comp2260089_c0_seq1|m.51968	3	200.7	510.1	324.9	254.6	631	423.3	257.3	611.5	408.9	286.9	676.1	445.2	280	670.8	441.3	269.8	698.2	432.2	345.233	436.3	425.9	469.4	464.033	466.733	0.682111	0.84598	0.860057	0.861812	0.939783	0.968745	3	3
comp2277224_c0_seq3|m.84614	1	367.5	332	335.7	393.8	358	349.3	388.8	349.2	340.5	424.7	414.2	396.4	375.5	343.5	331.5	385.4	344.5	359.1	345.067	367.033	359.5	411.767	350.167	363	0.681782	0.711673	0.725969	0.755998	0.709174	0.753438	3	3
comp2267827_c0_seq1|m.64485	4	70.1	478.1	484.4	108.1	496.1	534.8	89.8	464.5	496.5	79.7	469.5	507.3	91.2	444.3	481.9	81.9	483.4	490.1	344.2	379.667	350.267	352.167	339.133	351.8	0.680069	0.736169	0.707324	0.646573	0.686829	0.730191	3	3
comp1942453_c0_seq1|m.3357	2		344			378			368			434.4			375.2			343.3		344	378	368	434.4	375.2	343.3	0.679674	0.732937	0.743134	0.797552	0.759873	0.712549	2	1
comp2264717_c0_seq1|m.59263	1	385.7	443.1	202.7	462.2	495.4	219.1	468.7	506.4	221.5	246.6	291	130	337.2	375.8	169.1	370.7	412.9	185.8	343.833	392.233	398.867	222.533	294.033	323.133	0.679345	0.760535	0.805466	0.408568	0.59549	0.670691	3	3
Pdu_trscr_assembly_1|11058;|m.3808	2	401.9		284.9	335		239	351.9		256.8	395.8		283.1	332.2		207.8	323.1		235.1	343.4	287	304.35	339.45	270	279.1	0.678489	0.556489	0.6146	0.623225	0.546817	0.579296	3	2
comp2263914_c0_seq1|m.58092	2		342.5			349.5			383.3			444.4			391.8			478.3		342.5	349.5	383.3	444.4	391.8	478.3	0.67671	0.677676	0.774031	0.815912	0.793492	0.992753	2	1
comp2271098_c0_seq11|m.70418	2	341.5			351			345.5			557.5			354.2			304.8			341.5	351	345.5	557.5	354.2	304.8	0.674735	0.680584	0.697698	1.02356	0.717343	0.632639	2	1
comp2278605_c1_seq8|m.90480	6	383.7	447.9	191.9	334.5	357.1	154.4	395.6	457.2	205.6	507.5	612.9	211	483.2	559.3	198.5	390.5	447.6	190.4	341.167	282	352.8	443.8	413.667	342.833	0.674076	0.546794	0.712439	0.81481	0.837778	0.71158	3	3
comp2263317_c0_seq1|m.57143	3	287.7	211.3	521.9	312.2	196.1	512	314.3	200.7	507	363.5	243.8	630.4	308.5	210.3	528.9	296.9	190.6	503.5	340.3	340.1	340.667	412.567	349.233	330.333	0.672364	0.659449	0.687938	0.757466	0.707284	0.685635	3	3
comp2141779_c0_seq1|m.7354	4	374.2	294.6	351.9	414.2	350.4	434.5	373.8	323.4	396	545.1	403.8	453.8	397.5	344.4	412.1	379	325.9	399	340.233	399.7	364.4	467.567	384.667	367.967	0.672232	0.775013	0.735864	0.858446	0.779045	0.763746	3	3
comp2271050_c1_seq1|m.70325	1		311.2	368.9		262.1	356.8		200.8	283.8		296	362.4		236.1	297.5		301.9	385.7	340.05	309.45	242.3	329.2	266.8	343.8	0.67187	0.600019	0.489297	0.604406	0.540336	0.713586	2	2
comp2278004_c0_seq1|m.87205	2		339.7			316.6			302.4			378.9			343.4			305		339.7	316.6	302.4	378.9	343.4	305	0.671178	0.613883	0.610662	0.695655	0.69547	0.633054	3	1
comp2278371_c0_seq3|m.88751	3	224.2	385.1	409.3	245	423.6	442.4	245.2	429.6	432.7	294.8	496.2	517.9	256	454.1	478.3	236.7	439.5	454.4	339.533	370.333	369.167	436.3	396.133	376.867	0.670849	0.718071	0.74549	0.80104	0.802268	0.782219	3	3
comp2272901_c0_seq1|m.74237	2	379.6		298.9	455.9		370.9	392.5		332.2	400.6		343.7	386.9		318.1	371.4		313.4	339.25	413.4	362.35	372.15	352.5	342.4	0.670289	0.801577	0.731725	0.683262	0.7139	0.710681	3	2
comp2277898_c0_seq9|m.86830	2	338.5			438.1			394.9			369			309.9			336.6			338.5	438.1	394.9	369	309.9	336.6	0.668807	0.84947	0.797456	0.677479	0.627624	0.698642	2	1
comp2278234_c0_seq1|m.88157	2		291.8	384.9		354	486.1		298.4	405.9		274.8	400.6		237.7	329.6		265.7	344.7	338.35	420.05	352.15	337.7	283.65	305.2	0.668511	0.814471	0.711127	0.620012	0.574462	0.633469	3	2
comp2265897_c0_seq5|m.61166	6	209.5	501.2	303.3	195.6	567.5	334	201.6	527.4	322.8	179.5	546	328.7	176.4	590.7	342.4	198	542	352.9	338	365.7	350.6	351.4	369.833	364.3	0.667819	0.709087	0.707997	0.645165	0.749004	0.756136	3	3
comp2273697_c0_seq6|m.75886	4			337.8			340			317			376.6			315.2			333	337.8	340	317	376.6	315.2	333	0.667424	0.659255	0.640145	0.691432	0.638358	0.69117	3	1
comp2272050_c1_seq13|m.72385	2	337.4			363.3			299.2			432.8			381.3			362			337.4	363.3	299.2	432.8	381.3	362	0.666634	0.704434	0.6042	0.794614	0.772227	0.751362	3	1
comp2257713_c0_seq1|m.48441	4	256	223.1	532.8	332.2	288.3	581.4	293.7	245.4	521.2	371.1	313.7	670.8	305.1	288.6	604.8	282.8	242.3	560.4	337.3	400.633	353.433	451.867	399.5	361.833	0.666436	0.776823	0.713718	0.829621	0.809087	0.751016	3	3
comp2248223_c0_seq2|m.36362	2		208.5	465.9		207.5	487.2		182.8	441.5		218.8	458.1		184.9	435.5		196.3	419.1	337.2	347.35	312.15	338.45	310.2	307.7	0.666239	0.673507	0.630351	0.621389	0.628232	0.638658	3	2
comp2262489_c0_seq2|m.55836	1	362.1	304.8	342.6	363.8	321.7	351.1	352.8	320.5	337	462.9	397.8	422	360.3	312.4	334.5	346.3	320.4	338.8	336.5	345.533	336.767	427.567	335.733	335.167	0.664856	0.669984	0.680062	0.785006	0.679943	0.695667	3	3
comp2277450_c0_seq5|m.85299	2	317.6		354.7	333.7		394.6	301.5		367.3	354.5		457.8	342.4		422.4	330.4		434.4	336.15	364.15	334.4	406.15	382.4	382.4	0.664164	0.706082	0.675283	0.745685	0.774455	0.793704	3	2
comp2272926_c0_seq1|m.74298	3	49.5		622.6	63.5		648.5	58		630.6	67		722.5	67		655.1	57.3		661.4	336.05	356	344.3	394.75	361.05	359.35	0.663966	0.690279	0.695275	0.724755	0.731216	0.745862	2	2
comp2268304_c1_seq2|m.65411	3	695.6	156.3	155.9	726.8	152.7	145.1	687.1	148.2	155.7	810.4	178.8	183.7	712.9	150.2	140	650.5	141.1	140.8	335.933	341.533	330.333	390.967	334.367	310.8	0.663736	0.662229	0.667071	0.717809	0.677175	0.645092	3	3
comp2266374_c0_seq1|m.61929	3	579.6	279.7	148.1	624.3	300.7	155.9	561.4	255	137.3	624.1	271.5	137.8	580.4	239.1	130.5	558	248.7	131.1	335.8	360.3	317.9	344.467	316.667	312.6	0.663472	0.698617	0.641963	0.632436	0.641329	0.648828	3	3
comp2268967_c0_seq11|m.66518	2	415.3	412.7	178.1	400.4	411.6	159.6	418.4	403.6	160.2	477	500.9	189.9	399.4	415.7	181.7	379.9	389.3	163.6	335.367	323.867	327.4	389.267	332.267	310.933	0.662616	0.627973	0.661147	0.714688	0.672922	0.645369	3	3
comp2274203_c1_seq4|m.77107	4	512.6	238.1	253.2	554.7	276.5	308.2	513.5	251.5	270.8	522.9	212.4	219	531.2	266.7	302.5	516.6	263.7	283.3	334.633	379.8	345.267	318.1	366.8	354.533	0.661167	0.736427	0.697227	0.584027	0.742861	0.735864	3	3
comp2267344_c0_seq3|m.63656	1			334.5			312.8			311.9			467.2			375.2			356.9	334.5	312.8	311.9	467.2	375.2	356.9	0.660904	0.606515	0.629847	0.857772	0.759873	0.740777	1	1
comp2277670_c0_seq6|m.86031	3	179.5		486.9	165.3		500.5	158.4		447.4	182.3		454	169.7		445.5	166.1		420.2	333.2	332.9	302.9	318.15	307.6	293.15	0.658335	0.645489	0.611672	0.584119	0.622966	0.608458	3	2
comp2274983_c0_seq1|m.78805	1	346.2	320		349.5	364.8		318.9	326.8		412.4	405.8		382.2	355		350.2	374.7		333.1	357.15	322.85	409.1	368.6	362.45	0.658138	0.692509	0.651959	0.751102	0.746506	0.752296	3	2
comp2256095_c0_seq1|m.46136	3	320.7	349.5	325.4	305.5	363.6	321.5	272.8	313.4	316.5	216.9	292.8	197.5	166.4	205.6	156.1	190	222.8	171.5	331.867	330.2	300.9	235.733	176.033	194.767	0.655701	0.640253	0.607633	0.432803	0.356511	0.404255	3	3
comp2269814_c0_seq1|m.68069	6	157.2	553.9	284.2	190.7	612.6	343.7	165	632.2	328.4	201.5	725.2	383.9	219.6	774.7	379.8	181.2	622	329.4	331.767	382.333	375.2	436.867	458.033	377.533	0.655503	0.741339	0.757674	0.802081	0.927631	0.783603	3	3
comp2266689_c0_seq6|m.62502	6	185.6	102.6	706.4	220.4	115.4	633.2	182.2	94.8	533	217.1	113	578.8	224.9	114.4	502.8	221.3	110.5	494.2	331.533	323	270	302.967	280.7	275.333	0.655042	0.626293	0.545234	0.556242	0.568487	0.571478	3	3
comp2242318_c0_seq1|m.30778	1	331.4			317.1			373.5			482.8			377.3			366.3			331.4	317.1	373.5	482.8	377.3	366.3	0.654779	0.614853	0.754241	0.886414	0.764126	0.760287	3	1
comp2258222_c0_seq1|m.49130	2	331.3			335.1			300			300.1			275.2			269.6			331.3	335.1	300	300.1	275.2	269.6	0.654581	0.649754	0.605816	0.550979	0.557348	0.559578	3	1
comp2274690_c0_seq14|m.78138	2			331.2			390.4			389.3			333.4			348.3			348.8	331.2	390.4	389.3	333.4	348.3	348.8	0.654384	0.75698	0.786147	0.612118	0.705394	0.723964	3	1
comp2275967_c0_seq6|m.81134	3	331			371.5			349			536.3			331.6			331			331	371.5	349	536.3	331.6	331	0.653989	0.720334	0.704766	0.984639	0.671572	0.687019	3	1
comp2277815_c0_seq5|m.86532	7	143	486.7	361.9	128.5	520	379.8	132.6	459.6	372.7	160.3	566.9	512.8	180	582.8	462.8	166.3	513.5	419	330.533	342.767	321.633	413.333	408.533	366.267	0.653067	0.66462	0.649502	0.758874	0.827381	0.760218	3	3
comp2251254_c0_seq2|m.39863	3	397.5	341.3	252.6	311.7	244.6	189.2	251.3	183	187.6	326.4	258.3	269.6	287.8	210.3	226.4	351.2	325.6	244.3	330.467	248.5	207.3	284.767	241.5	307.033	0.652935	0.481838	0.418619	0.522827	0.489097	0.637274	3	3
comp2271667_c0_seq1|m.71637	9	602.7	227.3	160.6	772.5	232.7	186.8	650.2	238.7	202.7	640.8	230.1	178.1	672	230.3	179.2	630.8	219.6	149.2	330.2	397.333	363.867	349.667	360.5	333.2	0.652408	0.770424	0.734787	0.641983	0.730102	0.691585	3	3
comp2271594_c0_seq8|m.71451	5	360.6	380.1	248.4	357	358.4	235.5	335.7	360.9	241.3	454	457.5	331.5	326.1	346.5	241.4	333.5	339.9	235	329.7	316.967	312.633	414.333	304.667	302.8	0.65142	0.614594	0.631327	0.76071	0.617026	0.628487	3	3
comp2268978_c0_seq1|m.66540	3	328.8			359.3			437.7			660.3			429.2			379.5			328.8	359.3	437.7	660.3	429.2	379.5	0.649642	0.696678	0.883885	1.2123	0.869236	0.787685	3	1
comp1961272_c0_seq1|m.3584	4	79.2	348.6	558.5	73.6	354	543.4	72	310.2	503.9	71.2	296.3	499.7	65.4	310.9	496.6	69.9	311.8	496.2	328.767	323.667	295.367	289.067	290.967	292.633	0.649576	0.627585	0.596459	0.530722	0.58928	0.607386	3	3
comp2248486_c0_seq1|m.36619	4	323	356	305.3	406.8	406.8	351.8	350.7	401.3	358.8	416	434.3	394.6	375.9	441.3	424.8	340.3	403.7	365.1	328.1	388.467	370.267	414.967	414	369.7	0.648259	0.753232	0.747711	0.761873	0.838453	0.767344	3	3
comp2265049_c0_seq3|m.59764	3	170.3	373.4	440.5	86.3	249.3	343.4	95.1	267.7	340.9	334.8	742.9	844.5	379.4	789.1	862.9	318.2	667.4	722.4	328.067	226.333	234.567	640.733	677.133	569.333	0.648193	0.438857	0.473681	1.17638	1.37136	1.1817	3	3
comp2264160_c0_seq1|m.58510	3	310	276.3	397.9	350.4	297.5	385.7	372.1	324.2	418.8	430.8	377.7	482.2	382.7	326.6	446.1	340.5	279	393.4	328.067	344.533	371.7	430.233	385.133	337.633	0.648193	0.668046	0.750606	0.789902	0.779991	0.700787	3	3
Pdu_trscr_assembly_1|6063;|m.1748	4	281		374.2	268.4		377.8	271.9		348.2	388.9		444	275.1		348.9	263		387.7	327.6	323.1	310.05	416.45	312	325.35	0.647271	0.626487	0.626111	0.764596	0.631877	0.675292	3	2
comp2267894_c0_seq2|m.64638	2	78	576.9		77.3	639		79.1	591.3		89.2	618.4		94	641		84	614.6		327.45	358.15	335.2	353.8	367.5	349.3	0.646975	0.694448	0.676898	0.649572	0.744279	0.725002	2	2
comp2239106_c0_seq1|m.28160	3	348.2	304.8		321.8	262.6		296	278.4		479.7	339		339.5	258.2		297.8	249.2		326.5	292.2	287.2	409.35	298.85	273.5	0.645098	0.566572	0.579968	0.751561	0.605245	0.567673	3	2
comp2269698_c0_seq1|m.67864	3	364.1	306.6	308.3	327.2	269.1	236.7	368	305.8	260.8	507.6	408.2	330.5	480	369.1	325.8	373.1	305.3	258.9	326.333	277.667	311.533	415.433	391.633	312.433	0.644768	0.538392	0.629106	0.762729	0.793155	0.648482	3	3
comp2223629_c0_seq2|m.19557	3		325.1	326.5		319.1	323.7		332.1	325.6		326.9	336		289.5	301.1		297.7	309.3	325.8	321.4	328.85	331.45	295.3	303.5	0.643714	0.62319	0.664075	0.608537	0.598056	0.62994	3	2
comp2254275_c0_seq1|m.43783	3			325.3			357.2			346.9			416			347.9			334.4	325.3	357.2	346.9	416	347.9	334.4	0.642727	0.692606	0.700525	0.76377	0.704584	0.694076	3	1
comp2263558_c3_seq9|m.57481	3	324.1	308.5	342.9	347.1	349.2	366	338.5	345.9	348.5	469.9	527	548.9	311.8	307.3	316.7	293.1	296	312.1	325.167	354.1	344.3	515.267	311.933	300.4	0.642463	0.686595	0.695275	0.946022	0.631742	0.623506	3	3
comp2271448_c1_seq3|m.71106	4	317.7	387.2	270.1	366	446.8	317.6	360.8	413.1	298.9	349.9	423.8	267.6	330.7	345.9	218.6	301.5	341.5	220.1	325	376.8	357.6	347.1	298.4	287.7	0.642134	0.73061	0.722132	0.637271	0.604334	0.597146	3	3
gene2|m.92584	3	293.7	324.7	356.5	974.7	1107.4	1331.1	1181.7	1334.8	1680.4	371	404.9	480.9	291.8	310	364.6	323.2	321.5	382.1	324.967	1137.73	1398.97	418.933	322.133	342.267	0.642068	2.20605	2.82505	0.769155	0.6524	0.710404	3	3
comp2262213_c0_seq1|m.55382	5	501.3	148.5		552.2	180.2		497.9	171.9		488.1	289.9		476.5	174.8		574.1	180		324.9	366.2	334.9	389	325.65	377.05	0.641936	0.710057	0.676292	0.714198	0.659522	0.7826	3	2
comp2276799_c0_seq4|m.83351	5	465	90.3	419.3	482	99.3	449.6	450.6	97.5	416	464	90.2	457.8	421.8	95.1	415.9	453.9	93.4	443.6	324.867	343.633	321.367	337.333	310.933	330.3	0.64187	0.6663	0.648963	0.619339	0.629717	0.685566	3	3
comp2267432_c0_seq4|m.63814	1	400.5	248.6		434.1	272.2		435.6	266.9		510.4	320.6		452.7	280.6		445.6	276.2		324.55	353.15	351.25	415.5	366.65	360.9	0.641245	0.684753	0.709309	0.762852	0.742557	0.749079	3	2
comp2241415_c0_seq1|m.29926	1	324.4			339.4			313.5			350.6			310.2			338.8			324.4	339.4	313.5	350.6	310.2	338.8	0.640948	0.658092	0.633078	0.643696	0.628232	0.703209	3	1
comp2269309_c0_seq3|m.67196	7	282.4	142.2	547.5	362.5	194.2	668.4	323.2	170.8	592	287.1	156	598.8	334.9	173.5	618.2	334.4	176.3	567.1	324.033	408.367	362	347.3	375.533	359.267	0.640224	0.791817	0.731018	0.637638	0.760548	0.745689	3	3
comp2258465_c0_seq1|m.49476	4	404.5	243.4		388.2	253.4		416.7	252.4		366.2	241.7		453.1	259.2		448.9	251.7		323.95	320.8	334.55	303.95	356.15	350.3	0.640059	0.622027	0.675586	0.558048	0.721292	0.727078	3	2
comp2268260_c0_seq4|m.65318	2		323.4			315.2			346			389.1			410.7			326.1		323.4	315.2	346	389.1	410.7	326.1	0.638973	0.611169	0.698708	0.714382	0.831769	0.676849	3	1
comp2258284_c0_seq4|m.49190	7	558	321.1	88.3	692.3	417.7	113.2	601.1	342.3	96.3	613.5	330.2	82.6	623.7	363.7	82.2	612.8	336.3	100.3	322.467	407.733	346.567	342.1	356.533	349.8	0.637129	0.790589	0.699852	0.628091	0.722068	0.72604	3	3
comp2028238_c0_seq1|m.4606	1			322.4			310.1			256.8			223.4			218.7			212.1	322.4	310.1	256.8	223.4	218.7	212.1	0.636997	0.60128	0.518578	0.410159	0.442922	0.440232	1	1
comp2254451_c0_seq5|m.43983	3	212.2	175	578.4	236.3	211.7	612.9	233.6	167.6	544.7	247	210.7	727.6	233.3	181.5	650.9	239.1	192	572.2	321.867	353.633	315.3	395.1	355.233	334.433	0.635943	0.68569	0.636712	0.725398	0.719436	0.694145	3	3
comp2261399_c0_seq2|m.54155	2	275.6		367.3	233.1		388.8	288.2		414.5	281.7		392.6	277.9		393.3	268.9		383.4	321.45	310.95	351.35	337.15	335.6	326.15	0.63512	0.602928	0.709511	0.619002	0.679673	0.676952	3	2
comp2254428_c0_seq1|m.43957	4	457.3		185.3	455.3		213.4	467.5		200.9	721		241.2	522.2		222.3	460.8		210.4	321.3	334.35	334.2	481.1	372.25	335.6	0.634823	0.6483	0.674879	0.883293	0.753899	0.696567	3	2
comp2269793_c0_seq1|m.68039	9	328.7	513.9	119.5	280.6	536.7	123.6	344.1	587.2	144.3	428.4	696.2	175.6	374.8	598.3	157.1	327.9	553.8	131.8	320.7	313.633	358.533	433.4	376.733	337.833	0.633638	0.608131	0.724017	0.795716	0.762978	0.701202	3	3
comp2274278_c0_seq6|m.77267	3	243.7	492.6	225.6	279.2	537.8	235.1	272.7	529	213.9	286.1	561.3	244.1	294	556.1	199.7	268.1	513.2	210	320.633	350.7	338.533	363.833	349.933	330.433	0.633506	0.680003	0.68363	0.667993	0.708702	0.685843	3	3
comp2272703_c0_seq7|m.73774	2	238.8	401.9		294.6	450.4		210.7	338.6		170.4	257.9		148.9	225.2		188	315.3		320.35	372.5	274.65	214.15	187.05	251.65	0.632946	0.722272	0.554624	0.393176	0.378823	0.522321	3	2
comp2143185_c0_seq1|m.7622	7	481	427.4	52.2	497.4	415.9	59.1	472.7	426.3	58.8	445.8	362.5	61.5	427.4	407.2	56.2	407.1	381.8	59	320.2	324.133	319.267	289.933	296.933	282.633	0.63265	0.62849	0.644723	0.532313	0.601364	0.58663	3	3
comp2274924_c0_seq1|m.78660	5	502.5	137.6		490.4	137		453.4	137.8		475.8	126.5		446.7	125		466.8	126.6		320.05	313.7	295.6	301.15	285.85	296.7	0.632354	0.60826	0.596931	0.552907	0.578917	0.615826	3	2
comp2257395_c0_seq4|m.47951	2	582.7	195.5	181.9	456.1	114.1	100.5	594.6	211.9	190.3	593.4	282.5	266.3	608.8	258.6	231.8	515.4	178.2	155.2	320.033	223.567	332.267	380.733	366.4	282.933	0.632321	0.433493	0.670975	0.699021	0.742051	0.587252	3	3
comp2254671_c0_seq1|m.44239	2	277.4		362.6	263.6		342.3	267.5		333.1	298.9		392.7	272.8		371	295.8		365.2	320	302.95	300.3	345.8	321.9	330.5	0.632255	0.587416	0.606422	0.634884	0.651927	0.685981	3	2
comp2269996_c0_seq1|m.68391	2	267.9	424.2	267.7	324.9	483.7	296.1	285.1	442.4	258.8	267.9	458.6	256.8	233.9	370.7	216.9	250.2	404	236.6	319.933	368.233	328.767	327.767	273.833	296.933	0.632123	0.713999	0.663907	0.601775	0.55458	0.616311	3	3
comp2236094_c0_seq1|m.26100	2		472.2	167		433.5	150.1		352.5	131.7		590.3	168		515.2	163.4		481.5	156.4	319.6	291.8	242.1	379.15	339.3	318.95	0.631465	0.565796	0.488893	0.696114	0.687167	0.662008	3	2
comp2271110_c0_seq3|m.70433	3	424		215	455.5		225.3	446.9		217.5	525.4		283.2	413.7		234.7	412.4		202.2	319.5	340.4	332.2	404.3	324.2	307.3	0.631267	0.660031	0.67084	0.742289	0.656585	0.637828	3	2
comp2252847_c0_seq1|m.41763	10	358	191.8	408.2	396	232.6	482.9	356.4	184.7	440.2	472.3	200.4	423.8	471.9	178	439.5	393.9	199.6	475.6	319.333	370.5	327.1	365.5	363.133	356.367	0.630938	0.718395	0.660541	0.671053	0.735435	0.73967	3	3
comp2245053_c0_seq1|m.33185	3	139.7	417.7	400.4	154	439.2	415.7	136.7	389.4	399.8	144.5	432.1	399.2	130.3	441.9	405.8	134.9	430.6	392.9	319.267	336.3	308.633	325.267	326	319.467	0.630806	0.652081	0.62325	0.597185	0.660231	0.663081	3	3
comp2280497_c0_seq1|m.91229	2	320.4	297.2	339.5	355.7	313.4	376.1	331.5	283.5	340.9	344	299	337.2	331.3	272.1	331.5	325.4	268.6	323.9	319.033	348.4	318.633	326.733	311.633	305.967	0.630345	0.675543	0.643444	0.599878	0.631135	0.63506	3	3
comp2242283_c0_seq1|m.30762	1		334.3	303.4		213.1	150.5		175	146.8		289.4	149.3		249.4	173		214.1	155.2	318.85	181.8	160.9	219.35	211.2	184.65	0.629983	0.352508	0.324919	0.402723	0.427732	0.383257	2	2
comp2287273_c0_seq1_contamination|m.91384	2	395.8	466.9	90.6	397.5	444.4	93.5	373.2	417.5	98.7	416.6	453.7	110.7	402.8	450.8	72.9	377.2	430.2	76.6	317.767	311.8	296.467	327	308.833	294.667	0.627842	0.604576	0.598681	0.600367	0.625464	0.611606	3	3
comp2258511_c0_seq1|m.49520	3		313.7	321.7		312.2	294.3		315.2	319.3		342.6	226		297.2	253.8		287.8	284	317.7	303.25	317.25	284.3	275.5	285.9	0.627711	0.587998	0.64065	0.521971	0.557956	0.59341	3	2
comp2261527_c0_seq11|m.54302	1		352.3	282.7		317.7	261.4		289	236		296.6	244.9		236.1	183.5		275.8	233	317.5	289.55	262.5	270.75	209.8	254.4	0.627315	0.561434	0.530089	0.497093	0.424897	0.528029	3	2
comp2254390_c0_seq1|m.43922	4	520.9	251.3	179.4	600.5	297.7	233.2	580.5	286.3	212.7	711.9	331.8	252.6	660.2	312.7	240.9	646.2	301.2	217.1	317.2	377.133	359.833	432.1	404.6	388.167	0.626723	0.731256	0.726642	0.793329	0.819415	0.805673	3	3
comp2268347_c0_seq5|m.65496	5	409.3	112.1	429.8	431.1	118.7	454.2	436.4	121.8	435.8	409.5	115.8	489.8	401.6	115.6	434.5	385.2	112.1	412.2	317.067	334.667	331.333	338.367	317.233	303.167	0.626459	0.648914	0.66909	0.621236	0.642476	0.629248	3	3
comp2253856_c0_seq1|m.43254	2	206.5	183.6	560	248.8	204.5	554.8	219.9	187.6	541.5	207	235.3	568.6	197.5	198.4	453.3	213	177.1	476.5	316.7	336.033	316.333	336.967	283.067	288.867	0.625735	0.651564	0.638799	0.618666	0.57328	0.599568	3	3
comp2277289_c2_seq2|m.84787	1			313.4			292.9			268.8			230			241.5			248.9	313.4	292.9	268.8	230	241.5	248.9	0.619215	0.567929	0.542811	0.422277	0.489097	0.516613	1	1
comp2229729_c0_seq1|m.22264	1	214.8	266.2	458.3	163.6	232.9	391.8	173.1	237.1	400.8	226	274	449.2	245	265.6	459.9	194	233.9	391.5	313.1	262.767	270.333	316.4	323.5	273.133	0.618622	0.509501	0.545907	0.580906	0.655168	0.566912	3	3
comp2274446_c0_seq19|m.77642	7	329.6	378.3	226.9	307.3	326.4	172.3	302	329.6	185.8	510.3	359.6	205.6	305.1	352.8	181.3	311.4	358.2	216.7	311.6	268.667	272.467	358.5	279.733	295.433	0.615658	0.520941	0.550215	0.658201	0.566529	0.613197	3	3
comp2244356_c0_seq1|m.32598	1	325.6	380.7	228	283.5	314.2	212.6	255.7	302.4	175.2	219.1	247.5	184.6	197.3	247.8	177.6	187.2	232.8	153.7	311.433	270.1	244.433	217.067	207.567	191.233	0.615329	0.52372	0.493605	0.398531	0.420374	0.396921	3	3
comp2274212_c1_seq5|m.77123	1	311.1			308.5			307.5			389.4			325.5			283.4			311.1	308.5	307.5	389.4	325.5	283.4	0.61467	0.598177	0.620961	0.714933	0.659218	0.588221	3	1
comp2269080_c0_seq1|m.66759	2	391	268.9	273.2	309.6	224.7	224.6	326.1	230.2	222.5	375.3	257.7	266.6	322.7	238.2	211.5	301.8	205.8	199.1	311.033	252.967	259.6	299.867	257.467	235.567	0.614539	0.490499	0.524233	0.550551	0.521434	0.488939	3	3
comp2272194_c1_seq9|m.72665	2	325.8	187.5	418.2	333.5	181.8	437.2	317.2	175.7	415.5	347.3	202.9	463.4	331.5	193.1	436.7	306.5	176.6	403.3	310.5	317.5	302.8	337.867	320.433	295.467	0.613485	0.615628	0.61147	0.620318	0.648957	0.613266	3	3
comp2267172_c0_seq1|m.63318	4		231.6	388.2		261.6	418.1		239.2	385.9		295.1	468.3		227.9	415.6		235.3	393.4	309.9	339.85	312.55	381.7	321.75	314.35	0.612299	0.658965	0.631159	0.700796	0.651624	0.65246	3	2
comp2271794_c0_seq3|m.71863	3		309.4			285.2			278.3			321.1			284.9			276		309.4	285.2	278.3	321.1	284.9	276	0.611311	0.552999	0.561995	0.589535	0.576993	0.572862	3	1
comp2262649_c0_seq1|m.56105	9	388.6	206	333.3	390.6	227.9	301.2	377.2	219.9	304.6	404.5	253.7	380.6	407.9	255.4	365.1	406.1	229.5	327.3	309.3	306.567	300.567	346.267	342.8	320.967	0.611114	0.594429	0.60696	0.635741	0.694255	0.666194	3	3
comp2265049_c2_seq5|m.59768	1	257.8	360.5		176.6	260.3		188.8	262.9		356	463.9		417.3	527.7		356.9	429.2		309.15	218.45	225.85	409.95	472.5	393.05	0.610817	0.423572	0.456078	0.752662	0.95693	0.815809	2	2
comp2270829_c0_seq2|m.69940	2			308.9			299.5			304.1			446			350.1			298	308.9	299.5	304.1	446	350.1	298	0.610324	0.580726	0.614095	0.818849	0.709039	0.618525	3	1
comp2278623_c0_seq6|m.90693	11	762.9	64.7	98.5	818	101.6	98.1	814.8	80.3	101.1	916.9	77.9	93.6	847.2	82.9	105.3	796.6	80.1	100.8	308.7	339.233	332.067	362.8	345.133	325.833	0.609928	0.657769	0.670571	0.666095	0.698981	0.676295	3	3
comp2273656_c0_seq3|m.75800	1	287.3	292.2	345.3	324.9	358	357	284.6	299.6	327	349.9	355.4	403.6	284.9	311.3	331.2	291.9	302.1	327	308.267	346.633	303.733	369.633	309.133	307	0.609072	0.672117	0.613355	0.678641	0.626072	0.637205	3	3
comp2261639_c0_seq1|m.54451	1		307.1			353.7			336			369.4			407.7			371.6		307.1	353.7	336	369.4	407.7	371.6	0.606767	0.68582	0.678514	0.678213	0.825694	0.771288	1	1
comp2271449_c0_seq2|m.71108	2		250	364		252.7	367.7		232.5	344.8		235.1	364.2		222.1	344.8		236.3	363.6	307	310.2	288.65	299.65	283.45	299.95	0.60657	0.601474	0.582896	0.550153	0.574057	0.622572	3	2
comp2271969_c0_seq1|m.72217	3	233.8		379.4	303.7		412.2	261.8		415.7	382.2		425.9	308.3		386.2	294.7		414.6	306.6	357.95	338.75	404.05	347.25	354.65	0.605779	0.69406	0.684067	0.74183	0.703267	0.736107	3	2
comp2202168_c0_seq1|m.13322	3			306.3			300.6			312.6			306.1			294.5			301.6	306.3	300.6	312.6	306.1	294.5	301.6	0.605186	0.582859	0.63126	0.561995	0.596436	0.625997	2	1
comp2268775_c1_seq5|m.66198	2	321.5	473	123.1	280.5	443.8	124	281.4	430.6	119.3	273.2	436.2	119.2	331.3	506.7	128	324.3	523.5	121.8	305.867	282.767	277.1	276.2	322	323.2	0.60433	0.548281	0.559572	0.507099	0.65213	0.670829	3	3
comp2277830_c0_seq55|m.86577	6			305.5			335			326.5			313.1			300			292.4	305.5	335	326.5	313.1	300	292.4	0.603606	0.64956	0.65933	0.574847	0.607574	0.606901	3	1
comp2269231_c0_seq2|m.67056	3	106.6	496.3	312.1	106.2	506.2	272	101.8	496.6	316.4	67.4	402.7	338.4	68.9	410	310	79.2	458.7	272.9	305	294.8	304.933	269.5	262.967	270.267	0.602618	0.571613	0.615778	0.494798	0.532573	0.560962	3	3
comp2263799_c0_seq2|m.57905	2	307.8	302		341.4	326.6		328	318.6		331.5	315.8		365.1	345.1		335.6	314.9		304.9	334	323.3	323.65	355.1	325.25	0.60242	0.647622	0.652868	0.594217	0.719166	0.675084	3	2
comp2273576_c0_seq1|m.75622	7	121.4	520.2	272.6	144.2	543.2	297.5	128.1	474.8	261.6	139.8	564.8	341.1	162	593.2	301.8	136.5	515.2	283.4	304.733	328.3	288.167	348.567	352.333	311.7	0.602091	0.636569	0.58192	0.639963	0.713562	0.64696	3	3
comp2276783_c0_seq3|m.92635	3	293.2	291.4	328.3	304.4	297.5	338.4	319.4	284.5	330.5	371.6	347.2	396.1	394	344.7	413.5	345.3	313	342.5	304.3	313.433	311.467	371.633	384.067	333.6	0.601235	0.607743	0.628971	0.682313	0.77783	0.692415	3	3
Pdu_trscr_assembly_1|1514;|m.69841	2	312.5	269.9	329.3	312.7	258.7	326.2	394.2	314.2	394.3	571.5	411.7	566.6	428.3	317.8	429.5	350.1	287.1	346.8	303.9	299.2	367.567	516.6	391.867	328	0.600445	0.580145	0.742259	0.94847	0.793627	0.680792	3	3
comp2276956_c1_seq12|m.83833	5		303.6			258.7			190.3			239.4			196			203.4		303.6	258.7	190.3	239.4	196	203.4	0.599852	0.501616	0.384289	0.439535	0.396949	0.422174	3	1
Pdu_trscr_assembly_1|8306;|m.20141	4	189.2	141.4	580	242.1	172.8	731.9	226.3	137.3	603.1	166.5	144	556.1	218	138.9	593.7	220.5	136.6	625.4	303.533	382.267	322.233	288.867	316.867	327.5	0.59972	0.74121	0.650714	0.530355	0.641734	0.679754	3	3
comp2275698_c0_seq5|m.80432	3	271.6	248.1	390.2	333.5	324.3	519.4	303.2	279.3	436.8	406.3	302.4	512.1	335.9	277	437.4	311.4	284.2	441.2	303.3	392.4	339.767	406.933	350.1	345.6	0.599259	0.760858	0.68612	0.747124	0.709039	0.717322	3	3
comp2272283_c0_seq4|m.72873	5	263.2		343.2	306.4		367	264.9		348.6	366.1		493.1	298.2		357.4	289		381.4	303.2	336.7	306.75	429.6	327.8	335.2	0.599061	0.652857	0.619447	0.788739	0.663876	0.695736	3	2
comp2273558_c1_seq4|m.75586	1	287.6		318.6	330.8		356.2	267		313.8	391.9		420.2	317.7		337.8	330.6		346	303.1	343.5	290.4	406.05	327.75	338.3	0.598864	0.666042	0.58643	0.745502	0.663775	0.702171	3	2
comp2258804_c0_seq1|m.49953	2		127.2	478.1		134.3	501.1		115.6	474.8		107.3	472		113.6	414		129	461.4	302.65	317.7	295.2	289.65	263.8	295.2	0.597975	0.616016	0.596123	0.531793	0.53426	0.612713	3	2
comp2265821_c0_seq8|m.61038	2		247.3	357.9		227.5	318.2		215.5	339.2		287	570.3		253.3	476.6		259.4	382.7	302.6	272.85	277.35	428.65	364.95	321.05	0.597876	0.529052	0.560077	0.786995	0.739114	0.666367	3	2
comp2260860_c0_seq2|m.53272	1	158.9		446.2	133.2		375.9	139.4		395.7	115.4		298.8	152.9		419.4	143.8		385.4	302.55	254.55	267.55	207.1	286.15	264.6	0.597777	0.493569	0.540287	0.380233	0.579525	0.5492	3	2
comp2261333_c0_seq2|m.54083	4	488.3		116.3	503.7		125.7	495.1		110.4	522.4		117.7	513.2		120.5	482.7		121.8	302.3	314.7	302.75	320.05	316.85	302.25	0.597283	0.610199	0.611369	0.587607	0.6417	0.627346	3	2
comp2278054_c0_seq40|m.87392	3	302.2			331.8			343.6			366.1			343.1			349.9			302.2	331.8	343.6	366.1	343.1	349.9	0.597086	0.643356	0.693861	0.672154	0.694863	0.726248	3	1
comp2275026_c0_seq4|m.78895	2	295.6		307.2	342.6		359.6	271.8		261.3	203.1		222.6	177		171.3	239		235.4	301.4	351.1	266.55	212.85	174.15	237.2	0.595505	0.680778	0.538267	0.390789	0.352697	0.492329	3	2
comp2271257_c1_seq1|m.70699	1	202.7		399.9	223.7		431.2	236		474.9	250.5		489.6	269		513.7	231		446.5	301.3	327.45	355.45	370.05	391.35	338.75	0.595307	0.634921	0.717791	0.679406	0.792581	0.703105	2	2
comp2270865_c2_seq2|m.70000	4	551.6	122.5	228.9	567.8	128.6	240.8	520.7	121.7	223	567.6	121.4	265.2	577.9	148.3	220.5	531.4	140.2	211.7	301	312.4	288.467	318.067	315.567	294.433	0.594715	0.605739	0.582526	0.583966	0.639101	0.611122	3	3
comp2251620_c0_seq1|m.40264	1	286.3	259.5	357.1	278.8	249.4	370.1	327	307.7	429.4	334.3	306.6	439.3	319.6	313.9	441.9	314.4	305.3	403	300.967	299.433	354.7	360.067	358.467	340.9	0.594649	0.580597	0.716276	0.661077	0.725984	0.707567	3	3
comp2257019_c0_seq1|m.47394	5	355	321.6	225.2	396.8	332.7	278.8	393.9	326.2	241.9	452.1	384.9	264.9	405.3	371.4	234.9	406.4	355.4	227.5	300.6	336.1	320.667	367.3	337.2	329.767	0.593924	0.651693	0.64755	0.674357	0.682914	0.684459	3	3
comp2248979_c0_seq1|m.37223	1		300.2			291.2			244.9			328.8			233			221.1		300.2	291.2	244.9	328.8	233	221.1	0.593134	0.564633	0.494548	0.603672	0.471883	0.458912	3	1
comp2262843_c0_seq2|m.56395	4	45	648	206.9	63.9	635	218.4	54.9	659.3	191.9	42.8	710.7	198.5	46.2	593.1	189.4	43.2	651.6	178.4	299.967	305.767	302.033	317.333	276.233	291.067	0.592673	0.592877	0.609922	0.582619	0.559441	0.604134	3	3
comp2270011_c0_seq1|m.68419	2			299.9			260.9			297.7			404.7			360.2			324.2	299.9	260.9	297.7	404.7	360.2	324.2	0.592541	0.505882	0.601171	0.743023	0.729494	0.672905	2	1
comp2276182_c0_seq1|m.81743	4	358.8	275.2	265	418.9	322.6	327.2	383.3	295	303.3	409.6	307.7	319.1	360	282.6	319.4	380.5	285.7	306.3	299.667	356.233	327.2	345.467	320.667	324.167	0.59208	0.690732	0.660743	0.634272	0.64943	0.672836	3	3
comp2269189_c2_seq11|m.66972	2	464.6	184.4	249	480.1	207	235.6	429.7	175	226.7	573.7	203.2	328.4	538.4	232.9	284.9	519.6	219	256.3	299.333	307.567	277.133	368.433	352.067	331.633	0.591422	0.596368	0.559639	0.676438	0.713022	0.688333	3	3
comp2277384_c1_seq1|m.85078	1			299.2			306.3			271.3			476.2			305.1			285.3	299.2	306.3	271.3	476.2	305.1	285.3	0.591158	0.593912	0.547859	0.874296	0.617903	0.592165	1	1
comp2270822_c0_seq1|m.69931	3	212.7	502.1	182.3	224.2	632.3	211.7	217.1	546	178.9	248.7	524.8	236.7	219.5	605.5	200.8	206.7	481.2	187.4	299.033	356.067	314	336.733	341.933	291.767	0.590829	0.690408	0.634087	0.618237	0.6925	0.605587	3	3
comp2275523_c0_seq29|m.80039	3	311.2	234.1	348.2	321.4	186.6	338.9	289.3	211.8	334.2	307.9	274.1	357.3	341.6	224.4	357.9	315.6	213.8	328.4	297.833	282.3	278.433	313.1	307.967	285.933	0.588458	0.547376	0.562264	0.574847	0.623709	0.593479	3	3
comp2277156_c0_seq33|m.84412	7	610.6	139.5	143.3	575.7	149	163.9	545.3	136.8	147.1	639.2	196.4	145.8	551.1	144.8	145.4	595.6	132.1	143.8	297.8	296.2	276.4	327.133	280.433	290.5	0.588392	0.574328	0.558158	0.600612	0.567947	0.602958	3	3
comp2263986_c0_seq1|m.58211	4	229.5	450.9	210.4	231.5	443.5	228	229.9	444.7	208.7	269.2	520.2	271.3	220	468.5	229.1	217.3	408.7	197	296.933	301	294.433	353.567	305.867	274.333	0.58668	0.583635	0.594575	0.649143	0.619456	0.569402	3	3
comp2263850_c0_seq1|m.57985	7	136.5	485.9	266.7	156	526.7	300.6	121.5	452.1	255.5	111.7	421.9	241.9	105.2	417.4	224.4	134.5	471	284.2	296.367	327.767	276.367	258.5	249	296.567	0.58556	0.635535	0.558091	0.474602	0.504287	0.61555	3	3
comp2218413_c0_seq1|m.17441	3	282.1	163.9	442.2	318.5	196	438.3	310.3	187.8	422.4	350.7	184.1	454	290.8	171.8	404.8	284.2	163.5	424.8	296.067	317.6	306.833	329.6	289.133	290.833	0.584967	0.615822	0.619615	0.605141	0.585567	0.60365	3	3
comp2258245_c0_seq1|m.49148	3		204.5	387.4		195.1	372.9		175.5	354.7		173.6	369.2		167.1	338.6		165.1	367	295.95	284	265.1	271.4	252.85	266.05	0.584737	0.550672	0.535339	0.498286	0.512084	0.55221	3	2
comp2275358_c0_seq1|m.79627	4		428.1	163.3		464.3	164.5		463.6	174.1		340.3	167.3		428.7	161		472.1	150.3	295.7	314.4	318.85	253.8	294.85	311.2	0.584243	0.609617	0.643881	0.465973	0.597144	0.645922	3	2
comp2253325_c0_seq2|m.42478	4	282.9	307.3		252.9	281.7		253.6	279.3		291.2	296.5		233.3	267.7		238.9	268.1		295.1	267.3	266.45	293.85	250.5	253.5	0.583058	0.518291	0.538065	0.539504	0.507325	0.526161	3	2
comp2267807_c1_seq1|m.64459	5			294.7			330.1			269.2			303.9			305.9			293.6	294.7	330.1	269.2	303.9	305.9	293.6	0.582267	0.640059	0.543619	0.557956	0.619523	0.609392	3	1
comp2249397_c0_seq1|m.37621	1		294.4			240.5			277.2			315.6			267.4			245.5		294.4	240.5	277.2	315.6	267.4	245.5	0.581674	0.466326	0.559774	0.579437	0.541551	0.509556	1	1
comp2265661_c0_seq2|m.60784	2	294.1			295.9			266.3			295.5			252.7			236.2			294.1	295.9	266.3	295.5	252.7	236.2	0.581082	0.573746	0.537763	0.542534	0.51178	0.490253	3	1
comp2267780_c0_seq3|m.64433	1		450.3	136.2		546.4	170.4		526.7	149.3		553.8	175.1		497	154.9		501	148.5	293.25	358.4	338	364.45	325.95	324.75	0.579402	0.694933	0.682553	0.669125	0.66013	0.674047	2	2
comp2225039_c0_seq6|m.20122	3	530.3	60.3	288.3	545	77.6	509	599.6	80.3	353.8	689.6	129.9	375.7	604.9	134.2	410.9	577.5	89.1	399.3	292.967	377.2	344.567	398.4	383.333	355.3	0.578843	0.731386	0.695813	0.731457	0.776345	0.737456	3	3
comp2254530_c0_seq1|m.44073	4	244.7		340.2	138.8		220.1	144.2		218.8	148.3		232.1	131.8		190.5	112.2		189.8	292.45	179.45	181.5	190.2	161.15	151	0.577822	0.347951	0.366519	0.349204	0.326369	0.313413	3	2
comp2270017_c0_seq2|m.68431	2	226.4	357.9		258.1	423.9		235.8	379		278.5	394.3		241.1	339.5		256.2	366.3		292.15	341	307.4	336.4	290.3	311.25	0.577229	0.661194	0.620759	0.617625	0.58793	0.646026	2	2
comp2277815_c1_seq2|m.86535	2		291.3			285.2			269.4			333.9			320.8			299.5		291.3	285.2	269.4	333.9	320.8	299.5	0.57555	0.552999	0.544023	0.613035	0.6497	0.621638	2	1
comp2242993_c0_seq2|m.31419	2	237.3		344.8	223.8		354.8	211.9		328.3	221.1		340.8	208.5		328.1	220.8		330.4	291.05	289.3	270.1	280.95	268.3	275.6	0.575056	0.560949	0.545436	0.51582	0.543374	0.572031	3	2
comp2271802_c0_seq1|m.71876	3	238.5	218	415.3	255.1	236.4	413.1	226.3	222.1	395.4	290.5	339.7	510.6	253.6	232.9	411.7	247.1	201.7	382.1	290.6	301.533	281.267	380.267	299.4	276.967	0.574166	0.584669	0.567986	0.698164	0.606359	0.574868	3	3
comp2273250_c0_seq1|m.74973	1	222.2	303	343.5	225.4	278.3	336.5	232.1	288	328.2	340	489	563.4	248.2	321.1	374.5	230.7	282.4	327.7	289.567	280.067	282.767	464.133	314.6	280.267	0.572125	0.543046	0.571015	0.852142	0.637143	0.581718	3	3
comp2275371_c0_seq2|m.79664	7	85	379.3	404.3	99.1	457	452.8	91.3	439.5	451.7	101.9	533.8	470.5	87.1	426.7	447.6	94.8	375.3	473.4	289.533	336.3	327.5	368.733	320.467	314.5	0.572059	0.652081	0.661349	0.676989	0.649025	0.652772	3	3
comp2263787_c0_seq3|m.57874	3	212.6		364	236.2		363.4	204.4		339.7	230.9		344.4	154.8		270.9	162.6		300.8	288.3	299.8	272.05	287.65	212.85	231.7	0.569622	0.581308	0.549374	0.528121	0.431074	0.480913	3	2
comp2267233_c0_seq3|m.63437	6		287.9			282.5			264.2			285.3			234.2			249.8		287.9	282.5	264.2	285.3	234.2	249.8	0.568832	0.547764	0.533522	0.523807	0.474313	0.518481	3	1
comp2274461_c0_seq1|m.77682	2		287.8			279.7			295.8			344.4			325.5			282.3		287.8	279.7	295.8	344.4	325.5	282.3	0.568634	0.542335	0.597334	0.632313	0.659218	0.585938	2	1
comp2276976_c2_seq1|m.83882	2		287.5			270.1			265.6			305.3			276.5			274.5		287.5	270.1	265.6	305.3	276.5	274.5	0.568041	0.52372	0.536349	0.560526	0.559981	0.569748	3	1
comp2269084_c0_seq17|m.66769	2	296.5	278.3		307.6	305.4		287	289.4		328.3	324.3		333.3	286.4		324.4	299		287.4	306.5	288.2	326.3	309.85	311.7	0.567844	0.594299	0.581987	0.599082	0.627523	0.64696	2	2
comp2267722_c0_seq4|m.64316	3	291.9	329.5	240.2	271.7	334.9	238.1	225.9	299.9	193	241.8	306.8	209.7	224.3	303.9	182.2	265.2	313.3	210.1	287.2	281.567	239.6	252.767	236.8	262.867	0.567449	0.545954	0.483845	0.464076	0.479579	0.545602	3	3
comp2260227_c0_seq2|m.52143	3	287			351.6			293.9			271.4			260			264.1			287	351.6	293.9	271.4	260	264.1	0.567054	0.681748	0.593498	0.498286	0.526565	0.548162	3	1
comp2220452_c1_seq1|m.18249	4	450.8	127.5	278.8	515.1	141.8	325.2	454.3	126.9	275.5	483.9	137.9	289.2	465.6	155.5	248	447.1	130.3	260	285.7	327.367	285.567	303.667	289.7	279.133	0.564485	0.63476	0.576669	0.557528	0.586714	0.579365	3	3
comp2267313_c0_seq1|m.63601	3		407.4	163.5		425.8	168.7		414.6	163.4		420.7	160.9		422.3	169.3		403.7	167.9	285.45	297.25	289	290.8	295.8	285.8	0.563991	0.576364	0.583603	0.533905	0.599068	0.593202	3	2
comp2268828_c1_seq3|m.66273	2		328.9	241.8		325.2	256.6		367.9	252.9		416.8	326.1		321.5	247.4		310.7	232.5	285.35	290.9	310.4	371.45	284.45	271.6	0.563794	0.564051	0.626817	0.681977	0.576082	0.563729	2	2
comp2269647_c0_seq3|m.67780	4	347.1	264.1	239.5	313.5	275.7	157.2	321.1	261.1	160.6	310.2	245.5	179.9	252.2	209	129.8	285.7	247	137.8	283.567	248.8	247.6	245.2	197	223.5	0.56027	0.48242	0.5	0.450184	0.398974	0.463893	3	3
comp1198086_c0_seq1|m.1053	7	503.4	151.3	195	560.8	189	258.9	482.7	169.5	223.3	590.6	190	242.1	559.8	157.5	202.6	513.8	160.8	230.5	283.233	336.233	291.833	340.9	306.633	301.7	0.559611	0.651952	0.589324	0.625887	0.621009	0.626204	3	3
comp1315948_c0_seq1|m.1828	4	415.4	254.4	179.5	394.6	251.9	199.8	354.2	226.3	185.3	349.5	205.5	169.4	322.1	201.2	149.4	339.1	197.4	150.2	283.1	282.1	255.267	241.467	224.233	228.9	0.559348	0.546988	0.515482	0.443329	0.454128	0.475102	3	3
comp2262145_c0_seq1|m.55262	5	213.6	246.2	389.2	193	233.9	397.6	157.8	197.5	344.2	184.3	209.6	368.5	157.7	187.4	332.3	159.1	201.7	327.9	283	274.833	233.167	254.133	225.8	229.567	0.55915	0.532898	0.470854	0.466585	0.457301	0.476485	3	3
comp2273278_c0_seq8|m.75016	7	331.3	232.9		398.8	287.7		369.7	282.5		351.7	256.9		353	253.9		344.3	229		282.1	343.25	326.1	304.3	303.45	286.65	0.557372	0.665557	0.658522	0.55869	0.614562	0.594967	3	2
comp2257649_c0_seq1|m.48312	1	274.8	242.1	328.2	284.7	235.6	329.2	264.1	211.3	331	254.8	212.1	297.5	283.4	255.5	359.9	289.6	251.6	364.1	281.7	283.167	268.8	254.8	299.6	301.767	0.556582	0.549056	0.542811	0.467809	0.606764	0.626343	3	3
comp2258014_c0_seq1|m.48797	3	234.6	306	301.8	191.1	266.7	247.5	364.4	433.8	463.3	271.3	364.5	333.1	326.7	384.3	406.9	216.5	296	295	280.8	235.1	420.5	322.967	372.633	269.167	0.554804	0.455856	0.849152	0.592962	0.754675	0.558679	3	3
comp2273224_c0_seq8|m.74920	2	197.9	251.2	392.6	110.4	146.7	268.8	153.7	192.4	336.8	147.2	193.9	340.5	103.7	162.5	279.3	131.6	177.3	309.2	280.567	175.3	227.633	227.2	181.833	206.033	0.554343	0.339904	0.45968	0.417136	0.368258	0.42764	3	3
comp2253179_c0_seq1|m.42285	2		280.5			274.9			287.5			332			306.4			289.3		280.5	274.9	287.5	332	306.4	289.3	0.554211	0.533027	0.580574	0.609547	0.620536	0.600467	3	1
comp2254542_c0_seq1|m.44092	4	157.7	468.5	214.7	217.4	589.5	250.2	210.1	581.9	226.2	195.8	567.9	227.1	247.1	578	249.5	226.9	618.7	252.4	280.3	352.367	339.4	330.267	358.2	366	0.553816	0.683234	0.68538	0.606365	0.725444	0.759664	3	3
Pdu_trscr_assembly_1|1481;|m.1312	2		280.2			305.4			303.7			362.2			297.5			305		280.2	305.4	303.7	362.2	297.5	305	0.553618	0.592166	0.613288	0.664994	0.602511	0.633054	3	1
comp2269506_c0_seq28|m.67542	3	266	266.2	307.4	277	260.1	314.2	255.5	229.8	288.6	261.3	236.8	290	242.4	238.8	272.3	234.5	215.2	267.2	279.867	283.767	257.967	262.7	251.167	238.967	0.55296	0.55022	0.520934	0.482313	0.508675	0.495996	3	3
comp2271025_c0_seq1|m.70273	2		191.9	365		181.9	313.9		186.8	318.1		197.4	353.8		183.2	344.5		176.5	317.6	278.45	247.9	252.45	275.6	263.85	247.05	0.550161	0.480675	0.509794	0.505998	0.534362	0.512774	3	2
comp2272141_c0_seq2|m.72565	4	293.3	338.3	203.3	329.6	353.4	193.9	309.9	348.1	192.2	348.2	381.6	229.5	323.5	355.7	213.7	297.8	356.4	195.1	278.3	292.3	283.4	319.767	297.633	283.1	0.549864	0.566766	0.572294	0.587087	0.602781	0.587598	3	3
comp2278429_c0_seq12|m.89042	4	320.8		235.8	318.8		180.1	308.4		171.4	379.9		172.4	286.2		174	295.4		169	278.3	249.45	239.9	276.15	230.1	232.2	0.549864	0.48368	0.484451	0.507007	0.46601	0.481951	3	2
comp2278217_c0_seq3|m.88097	1		278.3			236.6			257			305.6			253.3			253		278.3	236.6	257	305.6	253.3	253	0.549864	0.458764	0.518982	0.561077	0.512995	0.525123	1	1
comp2254367_c0_seq1|m.43905	4	219.3		335.4	256.6		402.9	216.6		382.1	360.6		608.5	354.6		518.7	312.8		475.1	277.35	329.75	299.35	484.55	436.65	393.95	0.547987	0.639381	0.604503	0.889627	0.884325	0.817677	3	2
comp2263854_c0_seq1|m.57995	1	278.5		274.3	301.1		351	253.6		281	326.5		307.3	243.1		255.2	286.7		283.6	276.4	326.05	267.3	316.9	249.15	285.15	0.54611	0.632207	0.539782	0.581824	0.504591	0.591853	2	2
comp2277734_c0_seq10|m.86230	3	339.9	343.3	145	250.3	295	111.1	219.1	292.7	107.8	244.8	311.2	106.8	207.1	285.2	101.3	207.8	266.5	103.6	276.067	218.8	206.533	220.933	197.867	192.633	0.545452	0.42425	0.417071	0.40563	0.400729	0.399827	3	3
comp2264611_c0_seq3|m.59119	1	168.6	473.8	182.5	293.6	774.1	219.8	222.7	627.9	250.2	153.4	496.8	223.9	140.5	450.6	175.1	163	491.1	192	274.967	429.167	366.933	291.367	255.4	282.033	0.543278	0.832148	0.74098	0.534945	0.517248	0.585384	3	3
comp2262980_c0_seq1|m.56608	3	214.8	242.3	367	228.6	252	397.2	210.6	235	364.6	199.2	238.8	457.4	161.8	172.9	329.8	179.3	197.5	338.3	274.7	292.6	270.067	298.467	221.5	238.367	0.542751	0.567347	0.545369	0.54798	0.448592	0.49475	3	3
comp2142626_c0_seq1|m.7514	5	328.6	171.8	323.3	386.1	203.6	336.2	344.6	175.4	352.4	356.1	241.1	442.1	288.8	143.7	404.8	310.2	147	347.5	274.567	308.633	290.8	346.433	279.1	268.233	0.542488	0.598436	0.587237	0.636047	0.565247	0.556741	3	3
comp2267977_c0_seq1|m.64783	2	274.5			289.2			285.9			451.4			352.4			331			274.5	289.2	285.9	451.4	352.4	331	0.542356	0.560755	0.577342	0.828764	0.713697	0.687019	1	1
comp2269390_c0_seq1|m.67326	1	274.3			295.1			263.7			328.7			252.8			262.7			274.3	295.1	263.7	328.7	252.8	262.7	0.541961	0.572195	0.532512	0.603488	0.511983	0.545256	1	1
comp2271145_c1_seq1|m.70495	6	183.9	246.8	391.1	200.1	267.8	520.8	180.4	228.7	463.7	179.6	285.6	524	175.2	242.2	434.8	154.9	228.7	440.9	273.933	329.567	290.933	329.733	284.067	274.833	0.541237	0.639025	0.587507	0.605386	0.575305	0.57044	3	3
comp2256851_c1_seq3|m.47083	2	538	138.2	144.6	580.6	133.6	150.5	572.3	144.1	148.4	608.4	158.5	168.1	551.3	144.1	165.7	523.7	142.9	156.7	273.6	288.233	288.267	311.667	287.033	274.433	0.540578	0.558881	0.582122	0.572215	0.581314	0.56961	3	3
comp2204672_c0_seq1|m.13711	3	221.9		323.8	245.1		342.9	220.8		324	229.4		354.9	220.1		300.1	237.8		312.9	272.85	294	272.4	292.15	260.1	275.35	0.539096	0.570062	0.550081	0.536383	0.526767	0.571513	3	2
comp2266500_c0_seq1|m.62123	4		123	422.7		138.4	462.2		130.8	437.6		130.8	557.5		121.1	404.7		131.1	475.9	272.85	300.3	284.2	344.15	262.9	303.5	0.539096	0.582278	0.57391	0.631854	0.532438	0.62994	3	2
comp2218105_c0_seq4|m.17327	5	150.9	381.9	283.2	164.5	426	319.5	152.3	290.9	282.4	192.6	308.9	358	150.5	261.6	286.4	163.2	271.2	294	272	303.333	241.867	286.5	232.833	242.8	0.537417	0.588159	0.488422	0.52601	0.471545	0.503952	3	3
comp2272337_c0_seq9|m.72989	2	298.4	245.6		263.6	210.4		288.3	194		330.7	292.7		321.7	222		281.9	220.6		272	237	241.15	311.7	271.85	251.25	0.537417	0.45954	0.486975	0.572277	0.550564	0.521491	2	2
comp2277407_c0_seq1|m.85149	4	374.8	168.6		392.1	178		404.3	171.6		452.1	198.7		413	191.8		398.9	182.3		271.7	285.05	287.95	325.4	302.4	290.6	0.536824	0.552708	0.581482	0.59743	0.612435	0.603165	3	2
comp2269273_c0_seq1|m.67144	5		40.8	502.4		59.9	497.5		51.2	377.3		49.5	489.4		41.6	421.8		47.5	428.2	271.6	278.7	214.25	269.45	231.7	237.85	0.536626	0.540396	0.432653	0.494706	0.46925	0.493678	3	2
comp2271814_c0_seq1|m.71895	3	207.4	321.7	285.1	213.4	345.2	298	232.6	327.3	305.5	255.5	408.6	376.2	242.2	342.3	341.1	219.1	316.5	303.6	271.4	285.533	288.467	346.767	308.533	279.733	0.536231	0.553645	0.582526	0.636659	0.624857	0.580611	3	3
comp2188296_c0_seq1|m.11080	2	271.1			275.7			276.8			358.2			323.5			286.1			271.1	275.7	276.8	358.2	323.5	286.1	0.535638	0.534579	0.558966	0.65765	0.655168	0.593825	3	1
comp2276166_c0_seq8|m.81704	8	282.2	323.7	207.4	353	363.3	225.4	303.6	328.3	210.1	385.9	459.6	224.4	371.1	388.4	256.7	341.6	345.6	217.4	271.1	313.9	280.667	356.633	338.733	301.533	0.535638	0.608648	0.566774	0.654774	0.686019	0.625858	3	3
comp2262859_c0_seq3|m.56422	2	373.4	350.5	87.1	588.2	562.1	175.1	499.9	459.1	158.5	402.3	413.8	88.7	344.7	366.7	93.4	367.7	363.8	90.8	270.333	441.8	372.5	301.6	268.267	274.1	0.534124	0.856644	0.752221	0.553733	0.543307	0.568918	3	3
comp2274161_c1_seq14|m.77005	5	378.7	256.7	172.3	390.4	261	204	343.6	239.2	191.1	390.9	267.9	190	329.7	216	202.6	313.7	213.2	197.3	269.233	285.133	257.967	282.933	249.433	241.4	0.53195	0.55287	0.520934	0.519461	0.505164	0.501046	3	3
comp2275181_c0_seq3|m.79262	4	362.3	121.2	323.3	342.5	112.8	241.5	279.2	82.7	189.1	267.3	57.5	130.6	286	88.9	221.4	336.6	99.6	259.1	268.933	232.267	183.667	151.8	198.767	231.767	0.531358	0.450362	0.370894	0.278703	0.402552	0.481052	3	3
comp2277003_c1_seq5|m.83937	2	306.6	107.1	393	478.8	147	564.4	351.5	124.4	458.2	408.7	114.6	557.8	413.3	143.6	496.2	411.4	128.3	483.9	268.9	396.733	311.367	360.367	351.033	341.2	0.531292	0.769261	0.62877	0.661628	0.71093	0.70819	3	3
comp2240779_c0_seq2|m.29396	2	392	344.1	68.4	314	221.7	101.1	235.7	183.8	81.8	394.3	328.7	97.3	316.9	260.9	98.7	413.1	394.2	79.5	268.167	212.267	167.1	273.433	225.5	295.6	0.529843	0.411582	0.337439	0.50202	0.456693	0.613543	3	3
comp2264107_c0_seq1|m.58442	4	426.1	285.7	92.4	414.1	319.7	111.1	414.7	326.7	104.3	539.1	370.8	109	437.9	354.1	120.9	418.3	323.7	105.7	268.067	281.633	281.9	339.633	304.3	282.567	0.529645	0.546083	0.569265	0.623562	0.616283	0.586491	3	3
comp2275508_c1_seq3|m.80009	2	371.8	276.9	154.4	346.6	274.5	146.9	363.7	281.1	152.9	375.4	286.5	167.8	354.1	265.1	141.1	369	297.2	147.4	267.7	256	265.9	276.567	253.433	271.2	0.528921	0.496381	0.536955	0.507772	0.513265	0.562899	3	3
comp2273747_c0_seq4|m.75989	4	405.6	159.7	237.7	427.6	162.6	255.7	440.3	171.1	235.3	503.4	209.9	250.5	498.8	196.5	266.5	431.8	166.6	251	267.667	281.967	282.233	321.267	320.6	283.133	0.528855	0.54673	0.569938	0.589841	0.649295	0.587668	3	3
comp2261928_c0_seq2|m.54947	7	186.6	316.6	297.8	203.4	364.2	333.9	188.7	323.8	305.1	213.5	375.3	307.1	171.7	290.4	278.3	168	313.8	303.8	267	300.5	272.533	298.633	246.8	261.867	0.527538	0.582665	0.55035	0.548286	0.499831	0.543527	3	3
comp2248806_c0_seq1|m.37042	1	166.5		367.4	157.7		345.8	138		359.1	160.6		344.5	142.9		327.5	139.3		327.2	266.95	251.75	248.55	252.55	235.2	233.25	0.527439	0.48814	0.501918	0.463678	0.476338	0.48413	3	2
comp2224614_c0_seq1|m.19939	5	317.8	308.4	174.4	363.5	353.7	193.5	291.6	292.7	167.6	290.5	282.7	122.1	315.9	306.8	189.8	325.7	331.7	182.6	266.867	303.567	250.633	231.767	270.833	280	0.527274	0.588612	0.506125	0.42552	0.548505	0.581164	3	3
comp1684533_c0_seq1|m.2157	3	452.8		79.2	505.7		92	473.2		81.1	457.2		113	438.3		80.6	436.8		88.7	266	298.85	277.15	285.1	259.45	262.75	0.525562	0.579466	0.559673	0.523439	0.525451	0.54536	3	2
comp2275560_c0_seq10|m.80119	2		259	272.4		252.4	265.5		258.2	273.1		353.3	379.9		281.7	296.9		265.4	285.9	265.7	258.95	265.65	366.6	289.3	275.65	0.524969	0.502101	0.53645	0.673072	0.585904	0.572135	2	2
comp2250132_c0_seq2|m.38469	2			265.5			264.2			280			313.9			278.2			283	265.5	264.2	280	313.9	278.2	283	0.524574	0.51228	0.565428	0.576316	0.563424	0.587391	3	1
comp2248821_c1_seq2|m.37050	4	138.3	399.5	258.1	146.3	420.1	260.7	130.4	374.1	218.9	145.8	387.8	253.1	147.9	400.7	268.2	158.5	400.7	277.6	265.3	275.7	241.133	262.233	272.267	278.933	0.524179	0.534579	0.486941	0.481457	0.551408	0.57895	3	3
comp2272483_c0_seq2|m.73289	5	230.9		299.2	220.6		350.7	202.9		293.1	240.1		291.5	184.7		267.9	189.4		287.4	265.05	285.65	248	265.8	226.3	238.4	0.523685	0.553872	0.500808	0.488005	0.458314	0.49482	3	2
comp2277917_c0_seq1|m.86892	3	281.4	268.1	243.5	298.5	271.8	244.5	284.4	269.8	237	304.2	291.8	277.5	304.6	271.6	249.7	296.6	268.5	234.1	264.333	271.6	263.733	291.167	275.3	266.4	0.522269	0.526629	0.532579	0.534578	0.557551	0.552936	3	3
comp2245960_c0_seq1|m.34133	2	411.4	224.2	156.4	348.3	191.4	134.6	335.4	178.9	137.2	295.1	144.9	127	277.4	136.9	105.5	277.9	133.3	104.6	264	224.767	217.167	189	173.267	171.933	0.52161	0.43582	0.438543	0.347001	0.350908	0.356862	3	3
comp2257430_c0_seq1|m.47983	3	271	292.3	227.1	231.7	255.4	218.3	227.3	254.8	206.1	368	391.1	322.8	251.7	260.7	224.1	219.3	251.6	200.3	263.467	235.133	229.4	360.633	245.5	223.733	0.520557	0.45592	0.463247	0.662118	0.497198	0.464378	3	3
comp2276668_c0_seq1|m.83017	4	333.7	192.9		403.3	253.1		375.1	211.8		343.6	215.8		354.3	181.2		385.5	205.4		263.3	328.2	293.45	279.7	267.75	295.45	0.520227	0.636375	0.592589	0.513525	0.54226	0.613232	3	2
comp2276911_c0_seq1|m.83706	8	396.6	212.6	180.1	473.4	275.4	229.9	436.9	255.7	214.5	446.3	250.1	202.4	473.8	256.5	208.7	428.6	247.2	199.1	263.1	326.233	302.367	299.6	313	291.633	0.519832	0.632562	0.610595	0.550061	0.633903	0.60531	3	3
comp2263771_c0_seq2|m.57851	6	417.2	108.9		457.4	107.5		462.6	121.7		545.7	165.6		507.3	133.4		447.5	133.9		263.05	282.45	292.15	355.65	320.35	290.7	0.519733	0.547667	0.589964	0.652968	0.648788	0.603373	3	2
comp2261702_c0_seq1|m.54553	4	37.6		486.8	39.3		489.2	39.4		456.4	36.5		526.7	34.9		460	35.6		472.5	262.2	264.25	247.9	281.6	247.45	254.05	0.518054	0.512377	0.500606	0.517013	0.501148	0.527303	3	2
comp2269679_c1_seq1|m.67831	3			262.1			289.6			293.4			324.9			337.2			288.4	262.1	289.6	293.4	324.9	337.2	288.4	0.517856	0.561531	0.592488	0.596512	0.682914	0.598599	3	1
comp2267861_c0_seq2|m.64576	1		261.8			273.7			250.7			303.8			236.1			260.9		261.8	273.7	250.7	303.8	236.1	260.9	0.517264	0.530701	0.50626	0.557772	0.478161	0.54152	2	1
comp2274944_c1_seq2|m.78699	3			261.3			257.6			221.6			309.7			250.7			266	261.3	257.6	221.6	309.7	250.7	266	0.516276	0.499483	0.447496	0.568605	0.50773	0.552106	2	1
comp2225157_c0_seq1|m.20171	2	63.6	330.4	388.8	88	294.6	346.2	83	297.4	359.8	85.3	341.1	422.1	73.9	313.4	384.4	78.3	299.8	352.4	260.933	242.933	246.733	282.833	257.233	243.5	0.515551	0.471044	0.49825	0.519278	0.520961	0.505405	3	3
comp2277164_c0_seq2|m.84437	1			260.9			241.4			236.5			300.6			264.4			241.8	260.9	241.4	236.5	300.6	264.4	241.8	0.515485	0.468071	0.477585	0.551897	0.535476	0.501877	2	1
comp2272698_c0_seq4|m.73763	5	307.8	271	202.9	305.8	299	192.7	296.8	258.1	183.3	279.6	280.3	173.2	269.9	266.3	154.5	281.2	241.1	170.1	260.567	265.833	246.067	244.367	230.233	230.8	0.514827	0.515447	0.496904	0.448654	0.46628	0.479045	3	3
comp2256333_c0_seq1|m.46444	2	189.9	121.8	468.8	198.5	131	283.1	206.5	135.5	271.5	212.9	138.9	237.8	195	126.6	249.3	190.6	127.1	247.3	260.167	204.2	204.5	196.533	190.3	188.333	0.514036	0.395941	0.412964	0.360832	0.385405	0.390902	3	3
Pdu_trscr_assembly_1|14952;|m.66111	2		311.9	208.3		315.9	189.6		288.4	164.2		335.1	208.5		282.7	182.3		309.2	170.5	260.1	252.75	226.3	271.8	232.5	239.85	0.513905	0.490079	0.456987	0.499021	0.47087	0.497829	3	2
comp2262156_c0_seq8|m.55284	2			260			290			272.5			329.1			284.2			249.8	260	290	272.5	329.1	284.2	249.8	0.513707	0.562306	0.550283	0.604223	0.575576	0.518481	3	1
comp2248791_c1_seq1|m.37027	6	70.6	63	645.6	87.8	87	701.7	79.8	85.1	691.9	82.3	74	791	106.8	95.9	768.1	100.1	77.3	757.9	259.733	292.167	285.6	315.767	323.6	311.767	0.51318	0.566507	0.576737	0.579743	0.65537	0.647099	3	3
comp2277083_c0_seq3|m.84173	4	259.3			268.6			294			325.4			284.7			245.4			259.3	268.6	294	325.4	284.7	245.4	0.512324	0.520812	0.5937	0.59743	0.576588	0.509349	3	1
comp2276521_c1_seq5|m.82604	4	174.9	343.3		175.4	394		170.5	392.9		234.8	516.3		171.7	408.3		164.6	384.7		259.1	284.7	281.7	375.55	290	274.65	0.511929	0.552029	0.568861	0.689504	0.587322	0.57006	2	2
comp2260492_c1_seq4|m.52561	2		131.5	386.7		156.1	382.5		156.1	359.3		147.8	407.3		156.1	341.4		140.3	344.3	259.1	269.3	257.7	277.55	248.75	242.3	0.511929	0.522169	0.520396	0.509578	0.50378	0.502914	3	2
comp2236033_c0_seq1|m.26061	4	505.1	123	146.8	625.1	142.4	163.2	516.4	130	166.7	627.6	188.3	219.1	519.3	150.8	199.8	507.7	140.2	159.8	258.3	310.233	271.033	345	289.967	269.233	0.510348	0.601538	0.547321	0.633415	0.587254	0.558817	3	3
comp2272951_c0_seq1|m.74349	3	263.6	38.7	470.8	330.3	39.8	554	264	35.8	431.6	421.4	36.9	642.9	250.8	32.8	448.8	282.6	36.3	485.9	257.7	308.033	243.8	367.067	244.133	268.267	0.509163	0.597272	0.492326	0.673929	0.494431	0.556811	3	3
comp2275898_c0_seq1|m.80947	3			257.5			260.5			252.3			295.9			254.2			270.8	257.5	260.5	252.3	295.9	254.2	270.8	0.508768	0.505106	0.509491	0.543268	0.514818	0.562069	3	1
comp2271712_c0_seq1|m.71734	4	233.2	141.6	397.5	256.8	159.1	356.6	209.3	136.3	378	260.8	163.3	384.8	233.2	133.4	376.7	228	142.3	353.7	257.433	257.5	241.2	269.633	247.767	241.333	0.508636	0.499289	0.487076	0.495043	0.501789	0.500908	3	3
comp2277137_c0_seq4|m.84348	3	195.8	372.3	202.9	168.1	386.3	173.3	171.3	365.9	175	167.5	395	190.4	150.8	347.9	171.8	154.6	372.9	172.2	257	242.567	237.4	250.967	223.5	233.233	0.50778	0.470334	0.479402	0.460771	0.452643	0.484096	3	3
comp2279244_c0_seq1|m.91080	5	316.5	314.7	139.5	341.6	303.5	151.7	338.9	352.8	165.3	424.4	432.3	186.6	435.2	376.2	175.9	327.7	311.3	141.7	256.9	265.6	285.667	347.767	329.1	260.233	0.507582	0.514995	0.576871	0.638494	0.666509	0.540137	3	3
comp2274781_c0_seq3|m.78319	4	319.8		192.4	359.6		193.3	330.1		190.5	360.9		480.3	347.5		241.3	324.5		233.5	256.1	276.45	260.3	420.6	294.4	279	0.506001	0.536033	0.525646	0.772215	0.596233	0.579088	3	2
comp2271618_c0_seq6|m.71517	7	127.5	364.2	272.1	196.3	433	308.6	171.9	411.8	317	163.8	377.4	290.4	165.1	393.6	286.7	135.6	350.1	275.4	254.6	312.633	300.233	277.2	281.8	253.7	0.503038	0.606192	0.606287	0.508935	0.570715	0.526576	3	3
comp2268886_c0_seq20|m.66372	4		254.6			312.1			270.3			251.9			251.7			231.3		254.6	312.1	270.3	251.9	251.7	231.3	0.503038	0.605158	0.54584	0.462485	0.509755	0.480083	3	1
comp2265920_c0_seq2|m.61200	2	113.9	264.7	382	170.4	365.8	486.6	155.1	374.3	501.7	138.8	308.3	523.6	76.8	218.7	345.1	88.1	225.2	321.1	253.533	340.933	343.7	323.567	213.533	211.467	0.50093	0.661065	0.694063	0.594064	0.432458	0.438917	3	3
comp2268696_c0_seq1|m.66059	2		86.9	417.7		108.7	499.8		95.1	448.1		108.8	487.9		94.1	463.1		89.9	445.3	252.3	304.25	271.6	298.35	278.6	267.6	0.498493	0.589937	0.548465	0.547766	0.564234	0.555427	2	2
comp2264102_c0_seq1|m.58425	3		337.8	166.7		315.6	209.4		323.7	169.6		398.6	166.4		361	156.5		353.4	174.8	252.25	262.5	246.65	282.5	258.75	264.1	0.498395	0.508984	0.498082	0.518666	0.524033	0.548162	3	2
comp2277951_c0_seq2|m.87004	5	143.8	145.8	463.8	84.5	94.2	347.4	95.8	90.9	359.9	161.3	144.1	430	139.5	130.2	421.1	121.5	115.7	367	251.133	175.367	182.2	245.133	230.267	201.4	0.496188	0.340034	0.367932	0.450061	0.466347	0.418023	3	3
comp2275568_c0_seq2|m.80136	3	250.6			206.9			205.3			237.2			208.1			200.9			250.6	206.9	205.3	237.2	208.1	200.9	0.495135	0.401176	0.41458	0.435496	0.421454	0.416985	3	1
comp2252300_c0_seq1|m.41129	4	292.6	206	252.7	285.6	210.6	281.9	286.6	206.5	246.2	276.4	204.2	239.2	271	198.7	235.5	247.6	191.7	220.8	250.433	259.367	246.433	239.933	235.067	220.033	0.494805	0.502908	0.497644	0.440514	0.476068	0.456698	3	3
comp2266360_c0_seq2|m.61899	2	142.9	484.5	122.8	120.4	608.6	149.2	128.2	480.9	153.7	147.6	442.7	151.8	138.8	387.8	169.3	142.9	469.9	164.4	250.067	292.733	254.267	247.367	231.967	259.067	0.494081	0.567606	0.513463	0.454162	0.46979	0.537715	3	3
comp2275241_c0_seq5|m.79383	3	86.5	451.6	210.4	77.2	382.6	246.1	94.3	418.8	275.5	113	591	286.2	100.8	490.7	220.7	90.3	461.3	205.3	249.5	235.3	262.867	330.067	270.733	252.3	0.492961	0.456244	0.530829	0.605998	0.548302	0.52367	3	3
comp2251416_c0_seq1|m.40070	2	249.4			255.7			252.2			295			301.2			305.9			249.4	255.7	252.2	295	301.2	305.9	0.492764	0.495799	0.509289	0.541616	0.610005	0.634922	2	1
comp2261088_c0_seq2|m.53726	1			248.9			313.5			352.9			347.9			324.3			302.3	248.9	313.5	352.9	347.9	324.3	302.3	0.491776	0.607872	0.712641	0.638739	0.656788	0.62745	1	1
comp2261900_c0_seq4|m.54903	2		248.5			244.4			220.4			228.9			202.4			217.3		248.5	244.4	220.4	228.9	202.4	217.3	0.490985	0.473888	0.445073	0.420257	0.40991	0.451025	3	1
Pdu_trscr_assembly_1|21385;|m.76799	1	238.7	240.2	266.2	241.5	239.8	275.3	238.1	241.3	271.2	255.3	252.2	276.1	223.4	221	255.6	209.9	213.1	228	248.367	252.2	250.2	261.2	233.333	217	0.490722	0.489012	0.50525	0.479559	0.472558	0.450402	3	3
comp2265378_c0_seq1|m.60289	3			247.4			291.5			284.6			276.4			301.4			271.3	247.4	291.5	284.6	276.4	301.4	271.3	0.488812	0.565215	0.574717	0.507466	0.61041	0.563106	3	1
comp2277771_c0_seq4|m.86354	2	247.2			276			270			322			263			258.8			247.2	276	270	322	263	258.8	0.488417	0.53516	0.545234	0.591187	0.53264	0.537162	3	1
comp2277317_c0_seq1|m.84875	8	43.3	607.6	90.2	55.8	523.9	123.6	59	435.7	105.7	58.8	567.1	89	57.5	438.7	116.4	60.1	428.6	103.5	247.033	234.433	200.133	238.3	204.2	197.4	0.488088	0.454563	0.404146	0.437515	0.413556	0.409721	3	3
comp2272048_c0_seq5|m.72379	3	145.8	288.7	306.6	136.4	298	293.1	138.2	305.9	307.9	110.9	303.6	285.7	132.7	336.6	350.9	127.6	313	318.4	247.033	242.5	250.667	233.4	273.4	253	0.488088	0.470204	0.506193	0.428519	0.553703	0.525123	3	3
comp2276895_c0_seq2|m.83648	1			247			255.3			273.5			364.8			305.4			260	247	255.3	273.5	364.8	305.4	260	0.488022	0.495023	0.552302	0.669767	0.618511	0.539652	2	1
comp2270996_c0_seq5|m.70236	2	280.8	247.6	212.4	267.6	248.2	215.7	269	242.1	211.2	273.3	245	223.8	236.6	239.1	208.9	253.4	221.3	207.1	246.933	243.833	240.767	247.367	228.2	227.267	0.48789	0.47279	0.486201	0.454162	0.462162	0.471711	3	3
comp2233780_c0_seq1|m.24588	2	280.4	212.4		309.1	253.4		280.2	218.5		227.8	171.6		259.9	192.5		265.3	212.5		246.4	281.25	249.35	199.7	226.2	238.9	0.486836	0.54534	0.503534	0.366646	0.458111	0.495857	3	2
comp2252606_c0_seq1|m.41524	2			246			284.2			250.1			268			264.5			242	246	284.2	250.1	268	264.5	242	0.486046	0.55106	0.505048	0.492044	0.535678	0.502292	2	1
Pdu_trscr_assembly_1|1512;|m.69248	5		245			218.4			227.4			229.1			232.7			227.2		245	218.4	227.4	229.1	232.7	227.2	0.48407	0.423475	0.459208	0.420624	0.471275	0.471573	3	1
comp2276079_c0_seq1|m.81420	1		277.1	212.2		289.1	212.5		339.4	227.9		422.4	312.1		340.9	257.3		278.2	207.6	244.65	250.8	283.65	367.25	299.1	242.9	0.483379	0.486298	0.572799	0.674266	0.605752	0.50416	2	2
comp2245243_c0_seq1|m.33368	4	271.3	278.2	182.4	309.2	307.3	212.6	281.8	294.3	191.5	376.2	383.1	304.7	294.6	313.5	192.9	266.6	271.9	186.7	243.967	276.367	255.867	354.667	267	241.733	0.482028	0.535871	0.516694	0.651163	0.540741	0.501738	3	3
comp2268977_c0_seq1|m.66538	2		215.6	272.1		223.1	252.9		190.1	237.4		208.6	234.4		193.3	255.3		189	244.6	243.85	238	213.75	221.5	224.3	216.8	0.481798	0.461479	0.431644	0.406671	0.454263	0.449987	3	2
comp2270240_c0_seq1|m.68821	5	317.6	351.4	62.3	290	294	92.6	259.8	289.1	63.7	307.1	301.9	54.2	250.1	243.5	51.7	262.5	290.8	51.7	243.767	225.533	204.2	221.067	181.767	201.667	0.481633	0.437306	0.412359	0.405875	0.368123	0.418576	3	3
comp2277909_c0_seq1|m.86867	2		243.1			266.9			245.5			269.8			231.3			226.9		243.1	266.9	245.5	269.8	231.3	226.9	0.480316	0.517516	0.495759	0.495349	0.46844	0.47095	3	1
comp2264794_c0_seq2|m.59360	2	283.7	202.4		291.5	242		279.8	200.5		298	220.6		280.2	225.6		281.5	221.7		243.05	266.75	240.15	259.3	252.9	251.6	0.480217	0.517225	0.484956	0.476071	0.512185	0.522217	3	2
comp2275167_c0_seq1|m.79227	10	379.9	77.5	269.8	453.4	101.7	291.3	394.5	78.5	265.9	466.1	81	275.2	441.7	80.4	300.4	455.9	98	264.7	242.4	282.133	246.3	274.1	274.167	272.867	0.478933	0.547053	0.497375	0.503244	0.555256	0.566358	3	3
comp2277675_c0_seq81|m.86042	4	49.3	175.6	500.6	56.8	208.9	580.2	49.1	178.3	489.3	56.2	188.7	502.9	45.1	170.9	503.4	51.4	173.2	519.9	241.833	281.967	238.9	249.267	239.8	248.167	0.477813	0.54673	0.482431	0.45765	0.485654	0.515091	3	3
comp2277858_c1_seq2|m.86667	1			240.8			277.4			255.5			310.7			277.8			257.6	240.8	277.4	255.5	310.7	277.8	257.6	0.475772	0.537875	0.515953	0.570441	0.562614	0.534671	1	1
comp2270614_c0_seq1|m.69532	2			240.6			246.8			257.7			334.5			272.4			219.8	240.6	246.8	257.7	334.5	272.4	219.8	0.475377	0.478542	0.520396	0.614137	0.551678	0.456214	3	1
comp2264063_c0_seq1|m.58366	1		240.3			284.8			258.1			314.5			238.9			221.7		240.3	284.8	258.1	314.5	238.9	221.7	0.474784	0.552223	0.521204	0.577417	0.483832	0.460157	2	1
comp2254664_c0_seq1|m.44229	3	245.4	234.6		267.8	259.8		260.5	243.7		219.7	223.6		238.7	243		238.5	234.7		240	263.8	252.1	221.65	240.85	236.6	0.474191	0.511505	0.509087	0.406946	0.487781	0.491084	3	2
comp2272629_c0_seq1|m.73603	1		240			255			257.6			269			252.5			254.3		240	255	257.6	269	252.5	254.3	0.474191	0.494442	0.520194	0.49388	0.511375	0.527821	3	1
comp2261477_c0_seq2|m.54251	4	317.6	195.4	206.6	318.7	212.9	223.2	295.6	183.3	185.6	301.3	198.7	210.1	262.8	165.6	185.8	245.7	163.5	174	239.867	251.6	221.5	236.7	204.733	194.4	0.473928	0.487849	0.447294	0.434578	0.414636	0.403494	3	3
comp2260616_c0_seq1|m.52758	1	229.1	243.7	246.7	263.1	276.8	274.9	212	228.7	234.3	263.7	277.1	263.2	232.4	235.6	258.2	210.8	231.2	224.6	239.833	271.6	225	268	242.067	222.2	0.473862	0.526629	0.454362	0.492044	0.490245	0.461195	3	3
comp2245811_c0_seq1|m.34002	2		184.6	294.9		204.6	299.7		188.1	274.1		192.3	269.8		167.3	265.3		193.1	281.8	239.75	252.15	231.1	231.05	216.3	237.45	0.473697	0.488915	0.46668	0.424204	0.438061	0.492848	3	2
comp2247176_c0_seq3|m.35337	6	270	280.1	168.2	178.9	191.9	139.1	184.7	180.7	119.8	225	222.4	137.6	178.4	184.4	111.2	241.3	242.5	146.9	239.433	169.967	161.733	195	158	210.233	0.473072	0.329563	0.326602	0.358017	0.319989	0.436357	3	3
comp2273302_c0_seq35|m.75055	3	250	169.2	297.5	240.7	174.5	335.5	251.6	177.1	333.8	232.8	234.3	318.9	248.2	187.8	347.3	249.7	180.1	312.1	238.9	250.233	254.167	262	261.1	247.3	0.472018	0.485199	0.513261	0.481028	0.528792	0.513292	3	3
comp2275848_c0_seq1|m.80801	1			238.9			177.8			187.1			229.3			237			235.4	238.9	177.8	187.1	229.3	237	235.4	0.472018	0.344752	0.377827	0.420991	0.479984	0.488593	1	1
comp2279602_c0_seq1|m.91157	4			238.8			231.4			262.2			273.3			205.1			206.4	238.8	231.4	262.2	273.3	205.1	206.4	0.47182	0.448681	0.529483	0.501775	0.415378	0.428401	3	1
comp2273834_c2_seq2|m.76180	6	293.1	326	97	372.1	415.7	127.5	328.3	390.9	109	335.2	417.9	139	327.2	402	111.6	305.2	355.7	113	238.7	305.1	276.067	297.367	280.267	257.967	0.471623	0.591585	0.557485	0.545961	0.56761	0.535432	3	3
comp2250341_c0_seq1|m.38738	2	257.4	219.7		262.9	238.9		246.1	211.7		210.5	197.2		224.9	219.1		229.6	204.1		238.55	250.9	228.9	203.85	222	216.85	0.471326	0.486492	0.462237	0.374266	0.449605	0.450091	3	2
comp2269023_c0_seq1|m.66650	2		254.2	222		283.1	241.2		235.8	198.3		224	197.2		237.9	210		253.7	225.4	238.1	262.15	217.05	210.6	223.95	239.55	0.470437	0.508305	0.438308	0.386659	0.453554	0.497207	3	2
comp2258928_c0_seq1|m.50236	1	204.8	230.5	278.7	200.2	228.9	273.9	201.1	218.5	267.9	243.9	274.7	358	210.3	227.3	310.2	210.9	221.3	286.3	238	234.333	229.167	292.2	249.267	239.5	0.47024	0.454369	0.462776	0.536475	0.504827	0.497103	3	3
comp2258488_c0_seq1|m.49494	4	244.7	254	213.8	255.3	249	212.7	226.6	230.9	198.6	312.3	360.4	265	229.8	237.4	210.5	251.7	241.5	207.1	237.5	239	218.7	312.567	225.9	233.433	0.469252	0.463418	0.44164	0.573868	0.457504	0.484511	3	3
comp2246497_c0_seq1|m.34674	2		237.3			244.9			247.2			256.8			231.2			233.3		237.3	244.9	247.2	256.8	231.2	233.3	0.468857	0.474858	0.499192	0.471481	0.468237	0.484234	2	1
comp2266357_c0_seq11|m.61897	2	236.2			269.1			229.5			273.2			194.6			230.2			236.2	269.1	229.5	273.2	194.6	230.2	0.466683	0.521781	0.463449	0.501591	0.394113	0.4778	2	1
comp2245335_c0_seq1|m.33453	5	352.5	103.6	249.6	362.1	110	282.6	339.2	108.2	251.3	421	139.7	305.2	414.3	133.7	350.5	363.4	114.5	287.4	235.233	251.567	232.9	288.633	299.5	255.1	0.464773	0.487784	0.470315	0.529927	0.606562	0.529482	3	3
comp2311322_c0_seq1|m.91498	1	188.2	342.6	173.2	198.7	352	177.7	206.4	379.2	196	220.9	419.1	215.7	228.7	431.4	213.1	209.6	381.3	201.5	234.667	242.8	260.533	285.233	291.067	264.133	0.463654	0.470786	0.526117	0.523684	0.589482	0.548231	3	3
comp2276597_c0_seq2|m.82814	2	234.5			271.4			257.6			242.2			224.8			243			234.5	271.4	257.6	242.2	224.8	243	0.463324	0.526241	0.520194	0.444676	0.455276	0.504367	3	1
comp2272299_c0_seq11|m.72915	3	183.1	273	246.5	147	211.5	202.7	154.9	226.5	216	188.6	274.2	243.8	157.6	230.5	206.4	138.5	221.2	191.4	234.2	187.067	199.133	235.533	198.167	183.7	0.462732	0.36272	0.402127	0.432436	0.401337	0.381285	3	3
comp2260266_c0_seq6|m.52183	4	166.8		301.1	215.6		362.1	198.3		356.2	184.4		344	191.5		348.9	197.6		335.7	233.95	288.85	277.25	264.2	270.2	266.65	0.462238	0.560076	0.559875	0.485067	0.547222	0.553455	3	2
comp2273447_c0_seq1|m.75379	5	247.1	163.8	290.6	279.9	177.9	333.6	240.6	151.2	282	217.1	128.7	247.9	234.4	162.9	267.8	233.9	162.4	266.8	233.833	263.8	224.6	197.9	221.7	221.033	0.462007	0.511505	0.453554	0.363341	0.448998	0.458774	3	3
comp2277097_c0_seq4|m.84214	3		233.4			244.3			209.6			210.8			183.8			189.8		233.4	244.3	209.6	210.8	183.8	189.8	0.461151	0.473694	0.423263	0.387026	0.372241	0.393946	3	1
comp2253379_c0_seq1|m.42550	1	193.4	210.2	293.5	187.9	205.5	269.6	184.7	202.4	282.6	201	220.6	302.4	159	176.2	250.2	148.8	177.1	257.1	232.367	221	223.233	241.333	195.133	194.333	0.459109	0.428516	0.450794	0.443084	0.395193	0.403356	3	3
comp2278276_c0_seq16|m.88350	7	133.3	73.9	489.1	149.8	84.4	521	153.9	78.6	526.7	194	79.2	622.6	177.5	68	545.5	166.2	72.9	505.4	232.1	251.733	253.067	298.6	263.667	248.167	0.458582	0.488108	0.511039	0.548225	0.53399	0.515091	3	3
comp2233626_c0_seq1|m.24485	2			232.1			277.2			220.7			218.8			214.8			218.5	232.1	277.2	220.7	218.8	214.8	218.5	0.458582	0.537487	0.445679	0.401714	0.435023	0.453516	3	1
comp2278625_c0_seq8|m.90728	8		228.3	235		199.8	197.8		182.7	201.5		222.6	223.9		188.2	197.5		192.3	204.9	231.65	198.8	192.1	223.25	192.85	198.6	0.457693	0.385471	0.387924	0.409884	0.390569	0.412211	3	2
comp2278604_c0_seq2|m.90476	6	142.5		320.2	163.7		326.4	145.8		328.8	171.3		406	149.5		333.3	138.8		289.6	231.35	245.05	237.3	288.65	241.4	214.2	0.457101	0.475149	0.4792	0.529957	0.488895	0.444591	3	2
comp2220394_c0_seq1|m.18232	3	223.7	196.2	273.7	221.7	193.3	263.5	203.1	186.1	243.7	254.4	214.8	295.6	211.3	187	263.3	207.5	189.6	269.4	231.2	226.167	210.967	254.933	220.533	222.167	0.456804	0.438534	0.426023	0.468054	0.446635	0.461126	3	3
comp2234923_c0_seq1|m.25352	3	425.4	138.1	126	481.4	137.2	131.6	442.3	131.1	123.5	436.4	125.9	121.6	403.4	122.1	116.7	423.4	120.9	117.5	229.833	250.067	232.3	227.967	214.067	220.6	0.454104	0.484876	0.469103	0.418543	0.433538	0.457874	3	3
comp2269745_c1_seq1|m.67949	3	45.5	352.5	291.5	46.5	425.6	342.6	43.9	436.3	371.5	40.6	338.4	295.6	32.1	324.2	279.8	38.1	324.2	269.6	229.833	271.567	283.9	224.867	212.033	210.633	0.454104	0.526564	0.573304	0.412852	0.42942	0.437188	3	3
comp2266448_c1_seq3|m.62038	2	167.5	329.8	190.8	262.1	430.5	282.6	295.4	492	320.9	148.2	293.3	183.8	153.4	287.1	174	163.3	284	172.3	229.367	325.067	369.433	208.433	204.833	206.533	0.453182	0.6303	0.746029	0.382681	0.414838	0.428678	3	3
comp2265024_c0_seq1|m.59729	2	84.3	509.9	91.6	127.2	527	135.2	105.5	482.6	108.6	93.3	520.6	95.3	102.3	517.5	107.7	98.6	475.4	111.7	228.6	263.133	232.233	236.4	242.5	228.567	0.451667	0.510212	0.468969	0.434027	0.491123	0.47441	3	3
comp2276387_c0_seq13|m.82246	1	228	228.9		235.8	228.3		224.1	196.5		226.3	210.5		228.2	196.7		214	202.1		228.45	232.05	210.3	218.4	212.45	208.05	0.451371	0.449942	0.424677	0.400979	0.430264	0.431826	2	2
comp2272231_c1_seq2|m.72749	6	248.8	138.7	296.7	256.5	158.9	319.4	242	149.8	313.8	278.9	155.9	362.7	262	164.9	329.1	237.7	155.5	321.5	228.067	244.933	235.2	265.833	252	238.233	0.450613	0.474922	0.47496	0.488066	0.510363	0.494474	3	3
Pdu_trscr_assembly_1|1550;|m.78143	2		227.3			205			229.5			294			279.5			235.5		227.3	205	229.5	294	279.5	235.5	0.449099	0.397492	0.463449	0.53978	0.566057	0.4888	2	1
Pdu_trscr_assembly_1|11607;|m.26425	4	246.2	363.2	72.1	289	445.9	92.4	269.8	409.2	73.5	328.8	503.2	90.1	310.3	510.3	84.7	284	434.7	76	227.167	275.767	250.833	307.367	301.767	264.9	0.448835	0.534708	0.506529	0.564321	0.611152	0.549823	3	3
comp2265960_c0_seq1|m.61258	3	105.9	356.7	218.6	144.4	340.1	244	129.3	323.3	235.6	133	333.6	234.5	118.6	302.8	212.1	130.4	316.2	213.1	227.067	242.833	229.4	233.7	211.167	219.9	0.448638	0.470851	0.463247	0.42907	0.427665	0.456421	3	3
comp2277463_c2_seq4|m.85328	2	264.2	186.7	230.1	274.9	209.2	214.9	271.4	200.5	223.5	312.4	240.7	271.1	293.3	223.7	253.1	256.6	196.1	222.8	227	233	231.8	274.733	256.7	225.167	0.448506	0.451784	0.468094	0.504406	0.519881	0.467353	3	3
comp2278262_c0_seq1|m.88279	3	222.7	231.2		213	224.5		192	214.5		245.8	255.7		196.8	209.2		179.9	194.3		226.95	218.75	203.25	250.75	203	187.1	0.448407	0.424153	0.41044	0.460373	0.411125	0.388342	3	2
Pdu_trscr_assembly_1|1141;|m.41287	2	94	359.2		122.7	410.8		127.4	413.5		75.5	630.7		135.3	363.6		124.3	370.6		226.6	266.75	270.45	353.1	249.45	247.45	0.447715	0.517225	0.546143	0.648286	0.505198	0.513604	3	2
comp1601662_c0_seq1|m.2111	1	219.5	200.4	258	252.2	224.6	287.6	249.3	211.5	284	277.7	249.9	334.9	271	238.7	304.6	232.4	196.8	269.7	225.967	254.8	248.267	287.5	271.433	232.967	0.446464	0.494054	0.501346	0.527846	0.54972	0.483542	3	3
comp2276743_c0_seq1|m.83169	3	116.5	333.4		120.6	323.4		111.2	283.2		101.2	283.7		115.1	303.7		105.8	293.2		224.95	222	197.2	192.45	209.4	199.5	0.444455	0.430455	0.398223	0.353335	0.424087	0.414079	3	2
comp2261876_c0_seq1|m.54865	3	203.1	279.1	192.6	118.9	152.6	105.7	141.5	200.1	128.6	265.9	370.8	227.8	233.8	313.6	193.8	160.5	223.9	145.5	224.933	125.733	156.733	288.167	247.067	176.633	0.444422	0.243795	0.316505	0.52907	0.500371	0.366618	3	3
comp2260906_c0_seq3|m.53349	3			224.9			255.1			237.4			264.5			279.7			236.9	224.9	255.1	237.4	264.5	279.7	236.9	0.444357	0.494635	0.479402	0.485618	0.566462	0.491706	3	1
comp2260343_c0_seq1|m.52294	1	193.4	255.8		218.4	263.9		255	282.2		187.8	238		264.3	348.8		197.6	254.7		224.6	241.15	268.6	212.9	306.55	226.15	0.443764	0.467587	0.542407	0.390881	0.62084	0.469394	3	2
comp2274080_c0_seq4|m.76808	1	208.6	239.6		193.8	235.8		174.8	217		178.6	202.8		146.6	172.2		166.6	197.8		224.1	214.8	195.9	190.7	159.4	182.2	0.442776	0.416494	0.395598	0.350122	0.322825	0.378172	2	2
comp2254560_c0_seq1|m.44118	2	101.3	399.1	169.4	106	365.2	173.3	99.6	354.4	156.8	99.4	398.9	179.3	110.6	360.8	175.3	104.8	370.7	170.3	223.267	214.833	203.6	225.867	215.567	215.267	0.441129	0.416559	0.411147	0.414688	0.436576	0.446804	3	3
comp2273920_c0_seq4|m.76409	1	244.3	211.9	213.5	205.5	183.9	182.8	168	142.6	149.2	129.2	102.5	118.6	152.4	114.2	128.3	137.9	99.8	115.9	223.233	190.733	153.267	116.767	131.633	117.867	0.441064	0.369829	0.309505	0.214382	0.26659	0.244642	3	3
comp2239440_c0_seq1|m.28397	2	119.8		326.3	101		316.4	113.4		319.6	94.3		359.5	98.6		276.4	84.9		264.7	223.05	208.7	216.5	226.9	187.5	174.8	0.440701	0.404666	0.437197	0.416585	0.379734	0.362812	2	2
comp2277609_c0_seq25|m.85842	2	428.5	55	185.5	229.6	78.9	69.2	228.1	75	70	276.2	76.3	100.4	231.8	63.3	81.5	221.4	78.7	85	223	125.9	124.367	150.967	125.533	128.367	0.440603	0.244118	0.251144	0.277173	0.254236	0.266436	3	3
comp2277347_c0_seq29|m.84949	1	200.1	258.5	209.7	187.6	270.5	218.6	173.8	230	180.3	161.2	187.1	175.5	139.9	184.8	165	154.2	199.1	171.1	222.767	225.567	194.7	174.6	163.233	174.8	0.440142	0.437371	0.393174	0.320563	0.330588	0.362812	3	3
comp2236146_c0_seq1|m.26134	2	208.6		236.9	140.6		166	159.3		187.9	164.4		180.9	138.6		152.2	136.5		156.5	222.75	153.3	173.6	172.65	145.4	146.5	0.440109	0.297247	0.350565	0.316983	0.294471	0.304073	3	2
comp2269540_c0_seq7|m.67590	3	395.9	162.1	109.3	461.6	192	138.9	443.6	176.5	119.4	348.2	137.8	95.8	409.4	162	109.7	437.6	175.2	129.1	222.433	264.167	246.5	193.933	227.033	247.3	0.439483	0.512216	0.497779	0.356059	0.459799	0.513292	3	3
comp2220667_c0_seq1|m.18330	1			222.4			203.3			186.2			174.3			150.3			167.5	222.4	203.3	186.2	174.3	150.3	167.5	0.439417	0.394196	0.37601	0.320012	0.304395	0.347661	1	1
comp2274866_c0_seq19|m.78508	7	290.9	164.2	210.9	350	230.5	275.4	316	198.8	243.8	399.2	189.8	283.6	322	198.2	217.6	292.9	169.7	209.5	222	285.3	252.867	290.867	245.933	224.033	0.438627	0.553193	0.510635	0.534027	0.498076	0.465	3	3
comp2250552_c0_seq1|m.39066	1	221.9			277.3			247.6			295.9			232.3			263.3			221.9	277.3	247.6	295.9	232.3	263.3	0.438429	0.537681	0.5	0.543268	0.470465	0.546502	1	1
comp2278254_c0_seq21|m.88249	2	502.1	92.3	69.9	510.2	109.6	91.6	501.9	94.9	82.4	574.1	93.4	76.5	493.6	102	80.1	463.9	92.8	75.2	221.433	237.133	226.4	248	225.233	210.633	0.437507	0.459798	0.457189	0.455324	0.456153	0.437188	3	3
comp2235471_c0_seq1|m.25708	2	45.7		396.5	58.3		435.5	51.3		462.7	61.7		653	65.6		503.2	65.4		471.1	221.1	246.9	257	357.35	284.4	268.25	0.436849	0.478736	0.518982	0.656089	0.575981	0.556776	3	2
comp2276502_c0_seq8|m.82557	2	212.5		229.7	207.1		218	218.7		260.5	225		255.4	222.2		254.2	190.7		220.9	221.1	212.55	239.6	240.2	238.2	205.8	0.436849	0.412132	0.483845	0.441004	0.482414	0.427156	2	2
comp2268742_c2_seq1|m.66142	2		221			243.1			257.9			300.6			264.8			244.4		221	243.1	257.9	300.6	264.8	244.4	0.436651	0.471368	0.5208	0.551897	0.536286	0.507273	2	1
comp2141632_c0_seq1|m.7332	1		220.8			232.7			224.2			227.5			221.1			251.9		220.8	232.7	224.2	227.5	221.1	251.9	0.436256	0.451202	0.452746	0.417687	0.447782	0.52284	3	1
comp2266915_c0_seq2|m.62872	2	179.6	260.3		169.7	257.4		164.7	225		172.7	222.8		152.7	194		179.9	252.7		219.95	213.55	194.85	197.75	173.35	216.3	0.434576	0.414071	0.393477	0.363066	0.351077	0.448949	3	2
comp2253759_c0_seq1|m.43110	1	219.9			177			194.7			178.8			253.7			155.9			219.9	177	194.7	178.8	253.7	155.9	0.434478	0.343201	0.393174	0.328274	0.513805	0.323584	3	1
comp2264610_c0_seq2|m.59118	2	219.6			246.8			224			266			258.5			248.5			219.6	246.8	224	266	258.5	248.5	0.433885	0.478542	0.452342	0.488372	0.523527	0.515783	3	1
comp2271524_c0_seq1|m.71282	5	132.1	300.7	225	163.7	338.6	279.5	132.9	325.1	252.1	155.7	334	261.1	150.8	301.7	256.9	142.3	306.3	242.7	219.267	260.6	236.7	250.267	236.467	230.433	0.433226	0.5053	0.477989	0.459486	0.478904	0.478284	3	3
comp2278314_c0_seq1|m.88504	2	138.4		299.5	168.9		381.9	154.9		345.3	206.7		426.1	219.6		440	198.9		416.9	218.95	275.4	250.1	316.4	329.8	307.9	0.432601	0.533997	0.505048	0.580906	0.667927	0.639073	2	2
comp2270781_c0_seq3|m.69829	3	25.1	234.9	396.8	43.8	286.3	502.8	36.7	304.5	557.4	22.8	249.3	457	24.8	216.7	430.6	21.5	207	382.8	218.933	277.633	299.533	243.033	224.033	203.767	0.432568	0.538327	0.604873	0.446206	0.453723	0.422935	3	3
comp2278317_c0_seq5|m.88529	3		152	283.5		145.6	278.3		171.3	263.3		224.4	316.8		149.4	262.9		155.5	271.8	217.75	211.95	217.3	270.6	206.15	213.65	0.43023	0.410968	0.438813	0.496818	0.417505	0.443449	3	2
comp2272554_c1_seq2|m.73434	5	307	128.3		355.3	143.2		330.6	141.3		313.3	133.4		322.4	151.5		308	150		217.65	249.25	235.95	223.35	236.95	229	0.430032	0.483292	0.476474	0.410067	0.479883	0.475309	3	2
comp2243368_c0_seq4|m.31670	1	215.9		219.3	133.2		144.9	130.5		145.6	175.5		169.5	220.9		232.6	211.7		216	217.6	139.05	138.05	172.5	226.75	213.85	0.429933	0.269616	0.278776	0.316707	0.459225	0.443864	2	2
comp2271895_c0_seq9|m.72088	1	195.2	195.7	261.5	216.4	197.5	272.9	191	190.3	255.4	232.6	221.5	299.8	192.9	171.7	251	200.4	183.9	246.3	217.467	228.933	212.233	251.3	205.2	210.2	0.42967	0.443899	0.428581	0.461383	0.415581	0.436288	3	3
comp2260681_c0_seq1|m.52848	2		123.8	309.7		143.2	361.9		115.4	311.2		125.6	322.7		112	317.9		115.5	317.2	216.75	252.55	213.3	224.15	214.95	216.35	0.428254	0.489691	0.430735	0.411536	0.435327	0.449053	2	2
comp2278225_c0_seq1|m.88126	2	222.2	211		179.8	192.6		165.2	173.9		185.1	179.3		171.2	165		178.6	175.8		216.6	186.2	169.55	182.2	168.1	177.2	0.427958	0.361039	0.342387	0.334517	0.340444	0.367794	3	2
comp2263605_c0_seq2|m.57542	2	323.1	109.6		342.3	133.6		347.4	131.1		382.5	141.7		362.7	125.3		340.5	126.7		216.35	237.95	239.25	262.1	244	233.6	0.427464	0.461382	0.483138	0.481212	0.494161	0.484857	3	2
comp2278053_c0_seq1|m.87385	7	379.9	78.1	190.4	384.9	102.3	212.7	385.8	93.9	182.2	417.7	93.8	210.3	391	111.6	221.1	366.5	94	199.3	216.133	233.3	220.633	240.6	241.233	219.933	0.427035	0.452366	0.445544	0.441738	0.488557	0.456491	3	3
comp2139494_c0_seq1|m.6954	2		216.1			212.8			191			238.8			161.5			205.4		216.1	212.8	191	238.8	161.5	205.4	0.42697	0.412616	0.385703	0.438433	0.327078	0.426325	3	1
comp2274640_c0_seq9|m.78047	1		216.1			255.3			294.5			242			241.2			200.5		216.1	255.3	294.5	242	241.2	200.5	0.42697	0.495023	0.594709	0.444308	0.48849	0.416155	3	1
comp2269749_c0_seq2|m.67952	2	343.5	88		341.2	86.4		316	81.7		344.9	84		319.7	89.9		299.6	83.8		215.75	213.8	198.85	214.45	204.8	191.7	0.426278	0.414555	0.401555	0.393727	0.414771	0.39789	3	2
comp2260851_c0_seq2|m.53262	2	316	140.2	190.1	367	168.2	191.8	334	146	182.7	704.8	152.2	195.8	356.9	139.7	189	343.9	141	178.7	215.433	242.333	220.9	350.933	228.533	221.2	0.425652	0.469881	0.446082	0.644308	0.462837	0.45912	3	3
comp2276528_c1_seq4|m.82615	12	343	248.1	52.1	378.6	239.6	65.1	372.6	243.3	68	401.3	266.2	76.8	433	264.4	70.4	342.6	213.7	63.5	214.4	227.767	227.967	248.1	255.933	206.6	0.423611	0.441637	0.460353	0.455508	0.518328	0.428816	3	3
comp2268497_c0_seq1|m.65698	2	189.9		238.7	189.2		244.3	197.1		238.4	228.6		318.2	223.1		276.7	206		267.4	214.3	216.75	217.75	273.4	249.9	236.7	0.423413	0.420275	0.439721	0.501958	0.506109	0.491291	3	2
comp2275610_c0_seq1|m.80236	9	159.2	275.8	207.8	165	321.2	228	195	324.5	252.6	210.9	353.2	336.8	208	358	315.1	184.9	326.5	240.1	214.267	238.067	257.367	300.3	293.7	250.5	0.423347	0.461608	0.519723	0.551346	0.594815	0.519934	3	3
comp2280032_c0_seq1|m.91209	1	244.3	184.2		158.6	128.3		132	111.1		193.8	168.2		145	116.3		168.1	119.6		214.25	143.45	121.55	181	130.65	143.85	0.423314	0.278148	0.245456	0.332313	0.264599	0.298573	3	2
comp2274853_c0_seq1|m.78473	2	175	242	225.6	172.3	256.2	225.4	156.8	236.5	200.5	188.3	274.5	240	161.1	223.9	195.6	155.3	226.3	192	214.2	217.967	197.933	234.267	193.533	191.2	0.423216	0.422634	0.399704	0.43011	0.391953	0.396852	3	3
comp1194106_c0_seq1|m.742	4		366	62.4		459.4	104.2		423.2	74.9		447.3	78.3		477.7	114.4		412.6	96.3	214.2	281.8	249.05	262.8	296.05	254.45	0.423216	0.546406	0.502928	0.482497	0.599575	0.528133	3	2
comp2250017_c0_seq1|m.38311	4	257.9	199.3	185.3	202.7	180.7	162.6	221.7	168.6	156.6	232	208	187.7	191.1	180.3	155.4	237.8	189.3	161.7	214.167	182	182.3	209.233	175.6	196.267	0.42315	0.352896	0.368134	0.384149	0.355634	0.407368	3	3
comp2269909_c0_seq1|m.68221	2	144.7	283.2		150.1	332.4		158.7	319.2		156.5	356.7		162.6	284.4		142.7	263.6		213.95	241.25	238.95	256.6	223.5	203.15	0.422722	0.467781	0.482532	0.471114	0.452643	0.421655	3	2
comp2247825_c0_seq1|m.35982	2			213.7			172.8			199			229.9			202.2			163.8	213.7	172.8	199	229.9	202.2	163.8	0.422228	0.335057	0.401858	0.422093	0.409505	0.339981	2	1
comp2266439_c0_seq1|m.62025	8	438.9	103.6	98.2	462.3	121.3	126.8	508.2	113.8	123.4	662.5	124.6	142.7	603.8	131.1	132.2	494.1	117.1	119.2	213.567	236.8	248.467	309.933	289.033	243.467	0.421964	0.459152	0.50175	0.569033	0.585364	0.505336	3	3
comp2263921_c0_seq2|m.58101	1		154	270.8		117.7	223.8		128.1	254.6		191.2	448.5		158.9	327.8		134.7	286.4	212.4	170.75	191.35	319.85	243.35	210.55	0.419659	0.331082	0.38641	0.58724	0.492844	0.437015	2	2
comp2269290_c0_seq2|m.67173	3	119.9	345.2	171.7	76.3	274	131.6	93.5	314.5	153.2	58	277	107.8	55.3	258.3	111.6	73.4	299.4	117.1	212.267	160.633	187.067	147.6	141.733	163.3	0.419396	0.311466	0.37776	0.270991	0.287045	0.338943	3	3
comp2253329_c0_seq1|m.42482	5	230	202	202.4	231.5	224.9	202.5	268.8	254.3	239.3	367.7	336.2	325.2	258.9	211.2	238.2	233.2	212.7	218.2	211.467	219.633	254.133	343.033	236.1	221.367	0.417815	0.425866	0.513193	0.629804	0.478161	0.459466	3	3
comp2271704_c0_seq4|m.71718	6		380.7	41.7		428.1	65.4		404.8	56.9		437.7	69.7		390.1	66.4		377.8	50.8	211.2	246.75	230.85	253.7	228.25	214.3	0.417288	0.478445	0.466175	0.465789	0.462263	0.444798	3	2
comp2275831_c0_seq6|m.80767	1	192.3	182	258.9	204.4	184.8	254.7	194.9	177.4	233.1	246.1	216.9	302.8	204	183	256.9	214.2	189.4	249.7	211.067	214.633	201.8	255.267	214.633	217.767	0.417025	0.416171	0.407512	0.468666	0.434686	0.451993	3	3
comp2270733_c0_seq1|m.69758	5	147.9	121.1	363.3	158.5	143.6	534.6	143	133.6	441.6	139.4	123.1	379.4	129.9	123.5	384.1	139.9	111.1	366.7	210.767	278.9	239.4	213.967	212.5	205.9	0.416432	0.540783	0.483441	0.39284	0.430365	0.427363	3	3
comp2267652_c2_seq1|m.64198	4	455	86.2	89.5	544.6	110.7	132.7	471.9	87.2	110.5	460.4	72.6	90.3	469.7	93.9	112.7	471.6	99.5	132.8	210.233	262.667	223.2	207.767	225.433	234.633	0.415378	0.509307	0.450727	0.381457	0.456558	0.487002	3	3
comp2261393_c0_seq5|m.54147	3	343.2	150.9	134.5	388.4	167.1	150	330.3	144.9	119.7	364	161.5	143.4	369.8	169.3	149.3	396.9	177	145.5	209.533	235.167	198.3	222.967	229.467	239.8	0.413995	0.455985	0.400444	0.409364	0.464727	0.497726	3	3
comp2259070_c0_seq2|m.50488	2	200.7	216.7		178.1	200.1		184.2	228.2		190	250		161.1	191.1		177.9	208.1		208.7	189.1	206.2	220	176.1	193	0.412349	0.366662	0.416397	0.403917	0.356646	0.400588	2	2
comp2195994_c0_seq1|m.12218	2	422.8	100.3	101.8	457.9	112.5	122.4	421.4	112.8	109.2	401.4	93.9	86.1	371	105	114.7	363.2	95.5	100.3	208.3	230.933	214.467	193.8	196.9	186.333	0.411558	0.447777	0.433091	0.355814	0.398771	0.386751	3	3
comp2247431_c0_seq1|m.35575	1		207.6			228.6			206.7			232.1			188.7			182.9		207.6	228.6	206.7	232.1	188.7	182.9	0.410175	0.443252	0.417407	0.426132	0.382164	0.379625	1	1
Pdu_trscr_assembly_1|6232;|m.70239	2		163.2	251.6		161.9	228.6		164.7	240.6		170.6	272.9		168.4	251.9		146.9	229.8	207.4	195.25	202.65	221.75	210.15	188.35	0.40978	0.378587	0.409229	0.40713	0.425606	0.390937	3	2
[truncated: 368 more rows]

## Sheet: 6 TR
median per channel		693.2	648	701.4	707	669.3	722.1	683.1	635.5	682.3	721.5	688.6	731	662.3	642.1	673.9	664.1	632.4	667.1	591.867	599.05	568.167	626.167	568.383	563.583	Channel Norm
[truncated: 1,673 more rows]
