# Supplementary material for: Combined transcriptome and proteome profiling reveals specific molecular brain signatures for sex, maturation and circalunar clock phase
Source: eLife. 2019 Feb 15;8:e41556. doi: 10.7554/eLife.41556 (PMC6377233; doi:10.7554/eLife.41556)
Supplement: Figure 5—source data 18. — This file contains all DEPs predicted as significantly circalunar different by either the first, the second, or both proteome experiments. All proteins have also a BLASTx annotions where possible. Positive identification is marked by '+' in the respective column. [file elife-41556-fig5-data18.xlsx]

## Sheet: Sheet1
ID	UPSP Hit 1 e-val	UPSP Hit 1 score	UPSP Hit 1 ID	UPSP Hit 1 Def	UPSP Hit 2 e-val	UPSP Hit 2 score	UPSP Hit 2 ID	UPSP Hit 2 Def	UPSP Hit 3 e-val	UPSP Hit 3 score	UPSP Hit 3 ID	UPSP Hit 3 Def	IM old	IM new	PM.M	PM.F	SUM	Group / Candidate	nt seq	compID/nt seq
comp2277815_c0_seq5	8.3e-241	2330	sp|Q15147|PLCB4_HUMAN	1-phosphatidylinositol 4,5-bisphosphate phosphodiesterase beta-4 OS=Homo sapiens GN=PLCB4 PE=1 SV=3	2.5e-239	2316	sp|Q9QW07|PLCB4_RAT	1-phosphatidylinositol 4,5-bisphosphate phosphodiesterase beta-4 OS=Rattus norvegicus GN=Plcb4 PE=1 SV=2	1.5e-234	2085	sp|Q07722|PLCB4_BOVIN	1-phosphatidylinositol 4,5-bisphosphate phosphodiesterase beta-4 (Fragment) OS=Bos taurus GN=PLCB4 PE=1 SV=1		+			+		CAGGGTATTGCAGAACCATTTCCCACAGATCCAGGGCATTGGAGAATCATTTCCCATAGATTCAGGGTATTGTAGAACCATTTATCATAGATCCAGGGTATTGCAGATCCATTTCCCATGAAGCCAGGATATTTGTAACAATCTGCAAAACCTCTTCTTATAGATATGGGCCGGGGTATTGCAGAACCACTTCCTGAAGATCAAAGGTTCTCAGAGCTATACGCATTCTTAATTTAATTCCAGTATTGCGCGTTTCTCAATTAGATATATATATGCGTCGGCCGACATTTCAGACTGTTACTTCTTCCTCACGCAGTCCTGTGCGATAATTTATTAATATGACTAAAATGAAGTCTGGTGAATGACAACGCATCTCAAATGCTTGAATCTGGTCCATAA…	>comp2277815_c0_seq5 CAGGGTATTGCAGAACCATTTCCCACAGATCCAGGGCATTGGAGAATCATTTCCCATAGATTCAGGGTATTGTAGAACCATTTATCATAGATCCAGGGTATTGCAGATCCATTTCCCATGAAGCCAGGATATTTGTAACAATCTGCAAAACCTCTTCTTATAGATATGGGCCGGGGTATTGCAGAACCACTTCCTGAAGATCAAAGGTTCTCAGAGCTATACGCATTCTTAATTTAATTCCAGTATTGCGCGTTTCTCAATTAGATATATATATGCGTCGGCCGACATTTCAGACTGTTACTTCTTCCTCACGCAGTCCTGTGCGATAATTTATTAATATGACTAAAATGAAGTCTGGTGAATGACAACGCATCTCAA…
comp2248821_c1_seq2	1.5e-53	563	sp|C3ZAH2|MTND_BRAFL	1,2-dihydroxy-3-keto-5-methylthiopentene dioxygenase OS=Branchiostoma floridae GN=BRAFLDRAFT_119977 PE=3 SV=1	3.9e-53	559	sp|Q6AWN0|MTND_DROME	1,2-dihydroxy-3-keto-5-methylthiopentene dioxygenase OS=Drosophila melanogaster GN=Adi1 PE=2 SV=2	8e-53	556	sp|Q2LZI9|MTND_DROPS	1,2-dihydroxy-3-keto-5-methylthiopentene dioxygenase OS=Drosophila pseudoobscura pseudoobscura GN=GA16655 PE=3 SV=2			+		+		TGTAGGTTGTTTCTGTGACCTACTTATCCGGATAACTTTTTGACAGCTATTTGACAGCTCCACAGCATTTGACAGCTGTCAAGATGGTCAGGGCATGGTATATGGACAAAAGTGATGACGACCAGAAAGCTGCACACTTGACTGACCCTCCAGAATATGTGGAAATTGACAAATTGCAGGAGCTGACTAAAGTTGAATATTTCAAGATTAATTCAGACGACTTCGCGAATGACAAAACCCTCCAAGATCTTCGTAAAACTAGAGGATATTCTTATGAAGACAACGTGAGAATCACACCCCAAATGCAAGGATATGATGACAAGATGAAGATGTTTTTTCGTGAGCACATCCACTCAGATGAAGAGATCAGACTTATCGTAGATGGGTCGGGATATTTTG…	>comp2248821_c1_seq2 TGTAGGTTGTTTCTGTGACCTACTTATCCGGATAACTTTTTGACAGCTATTTGACAGCTCCACAGCATTTGACAGCTGTCAAGATGGTCAGGGCATGGTATATGGACAAAAGTGATGACGACCAGAAAGCTGCACACTTGACTGACCCTCCAGAATATGTGGAAATTGACAAATTGCAGGAGCTGACTAAAGTTGAATATTTCAAGATTAATTCAGACGACTTCGCGAATGACAAAACCCTCCAAGATCTTCGTAAAACTAGAGGATATTCTTATGAAGACAACGTGAGAATCACACCCCAAATGCAAGGATATGATGACAAGATGAAGATGTTTTTTCGTGAGCACATCCACTCAGATGAAGAGATCAGACTTATCG…
comp2279773_c0_seq1	9.4e-114	1131	sp|P62261|1433E_BOVIN	14-3-3 protein epsilon OS=Bos taurus GN=YWHAE PE=2 SV=1	9.4e-114	1131	sp|Q5ZMT0|1433E_CHICK	14-3-3 protein epsilon OS=Gallus gallus GN=YWHAE PE=1 SV=1	9.4e-114	1131	sp|P62258|1433E_HUMAN	14-3-3 protein epsilon OS=Homo sapiens GN=YWHAE PE=1 SV=1			+		+		ATCTATCAGCTACCAAGATCTACAATTACCCAACTGCCGCAAAAATTTTGATTCATATCTTTATTTTTATCACAGATGTATACTTAACAGGACCACATTTAATACATGATCCGACTTCCTCACGATACCAATTCTGAATTGCCTAAAGAGATACTTAGTTCCACACCTACAATTTCAGTCAAAACAAAAATGGGATTTGACAAGATTTTTTTTAATGTTAAAAGCATGACATCAGTTTACAAAGAGATACATTCCCTGAATACATCTACAACAATCACTCTAAACATCTATTACATACTCATGAACTTGAGAAAAAAAAATTGATAATTTAGCTTCACGGCTCCACACTGAATTCTTTTTTAAGTACAATTCACAGTACCATAGCATTATAAATTGATA…	>comp2279773_c0_seq1 ATCTATCAGCTACCAAGATCTACAATTACCCAACTGCCGCAAAAATTTTGATTCATATCTTTATTTTTATCACAGATGTATACTTAACAGGACCACATTTAATACATGATCCGACTTCCTCACGATACCAATTCTGAATTGCCTAAAGAGATACTTAGTTCCACACCTACAATTTCAGTCAAAACAAAAATGGGATTTGACAAGATTTTTTTTAATGTTAAAAGCATGACATCAGTTTACAAAGAGATACATTCCCTGAATACATCTACAACAATCACTCTAAACATCTATTACATACTCATGAACTTGAGAAAAAAAAATTGATAATTTAGCTTCACGGCTCCACACTGAATTCTTTTTTAAGTACAATTCACAGTA…
comp1781461_c0_seq1	2.7e-07	138	sp|Q05961|OAS1A_RAT	2'-5'-oligoadenylate synthase 1A OS=Rattus norvegicus GN=Oas1a PE=2 SV=1	1.9e-06	164	sp|Q8VI93|OAS3_MOUSE	2'-5'-oligoadenylate synthase 3 OS=Mus musculus GN=Oas3 PE=1 SV=1	8.9e-07	161	sp|Q5MYT7|OAS3_RAT	2'-5'-oligoadenylate synthase 3 OS=Rattus norvegicus GN=Oas3 PE=2 SV=1		+			+		ATTGAGCGGAAACACGTGGAGGAAGAGGCGACCTGAATATCTGGGTCAGGGCAGAGCGAGTCGTAGGCGTGAGATCTCAGTTCAGGGAAGACTTCCAAACATTGACTTAATCAGTGCCTACCTGAGCTACACCCGGCAAAAAACTTCAGTTAGACCTTCTTTGTAACTAGTGAATCAAGATGTCTGAAGTTGACCCTAAACAAGTCAATGGTGATGTTGCCCCCAAACAAGTGAACGGTGATGTCGCCCCTGCCGAACCTGCAAAAGAAGTGCCTGCCGATGGTCCAGTCATGAAGGAAATCTCTGAAAATAACAAAGATGTGAATGAAAATGTGGAAGAAAAGTCTGGTCAGGACAGTAAAGCAAAACCAGACAAGAAATTCTTGCAAAAACCAGGAG…	>comp1781461_c0_seq1 ATTGAGCGGAAACACGTGGAGGAAGAGGCGACCTGAATATCTGGGTCAGGGCAGAGCGAGTCGTAGGCGTGAGATCTCAGTTCAGGGAAGACTTCCAAACATTGACTTAATCAGTGCCTACCTGAGCTACACCCGGCAAAAAACTTCAGTTAGACCTTCTTTGTAACTAGTGAATCAAGATGTCTGAAGTTGACCCTAAACAAGTCAATGGTGATGTTGCCCCCAAACAAGTGAACGGTGATGTCGCCCCTGCCGAACCTGCAAAAGAAGTGCCTGCCGATGGTCCAGTCATGAAGGAAATCTCTGAAAATAACAAAGATGTGAATGAAAATGTGGAAGAAAAGTCTGGTCAGGACAGTAAAGCAAAACCAGACAAGA…
comp2268046_c1_seq1	3.2e-216	2098	sp|P62191|PRS4_HUMAN	26S protease regulatory subunit 4 OS=Homo sapiens GN=PSMC1 PE=1 SV=1	3.2e-216	2098	sp|P62192|PRS4_MOUSE	26S protease regulatory subunit 4 OS=Mus musculus GN=Psmc1 PE=1 SV=1	3.2e-216	2098	sp|P62193|PRS4_RAT	26S protease regulatory subunit 4 OS=Rattus norvegicus GN=Psmc1 PE=2 SV=1			+		+		TTGTCAGGCTGTTTAGTTGCTCTGGATCACATGTTTACATTTTGAAGTGGCGATTTTGGCTGTATTCACGGACGTTTCACTGGCATATTACTGAAGAAAATAGCAGAAATTTGATGTCAGTGGCCTTCTCCCATTCCCATTACTCACTCAGCCTGACTAGATCAGCAGACTACAGCTTGACCATCTCATTCTGATGTCCACCACGTGGCACTGAACATCGAAGTTGACTCGAGAGCCCCCTGGTGAAAAGTTTGTGAAATTCTACTGCACATGCGCACTAGAATTTCAAGATGGGCCAACAGCAGTCTGGGGGTTCTGGTGGCCAAGGCGGCGACAAGAAGGATGACAAGGATAAGAAAAAGAAGTATGAACCGCCTGTGCCAACCCGAGTTGGAAAGA…	>comp2268046_c1_seq1 TTGTCAGGCTGTTTAGTTGCTCTGGATCACATGTTTACATTTTGAAGTGGCGATTTTGGCTGTATTCACGGACGTTTCACTGGCATATTACTGAAGAAAATAGCAGAAATTTGATGTCAGTGGCCTTCTCCCATTCCCATTACTCACTCAGCCTGACTAGATCAGCAGACTACAGCTTGACCATCTCATTCTGATGTCCACCACGTGGCACTGAACATCGAAGTTGACTCGAGAGCCCCCTGGTGAAAAGTTTGTGAAATTCTACTGCACATGCGCACTAGAATTTCAAGATGGGCCAACAGCAGTCTGGGGGTTCTGGTGGCCAAGGCGGCGACAAGAAGGATGACAAGGATAAGAAAAAGAAGTATGAACCGCCTG…
gnl_Pdu_trscr_assembly_1_1797	1.7e-123	1223	sp|P84169|PSD13_CHICK	26S proteasome non-ATPase regulatory subunit 13 OS=Gallus gallus GN=PSMD13 PE=1 SV=1	8.3e-122	1207	sp|Q9UNM6|PSD13_HUMAN	26S proteasome non-ATPase regulatory subunit 13 OS=Homo sapiens GN=PSMD13 PE=1 SV=2	1.4e-121	1205	sp|Q5E964|PSD13_BOVIN	26S proteasome non-ATPase regulatory subunit 13 OS=Bos taurus GN=PSMD13 PE=2 SV=1		+			+	Group_26S_Proteasome_regulatory_subunits	TTGAGACAAGCATTTTCACAACTTCATAATATTTATATGAGAGCCTCAAAAATAACTTTAAAGCCAAAACAAAATAACAATAGTTTATGCGGCAGTTGCGCAGGCATAACAAGTTACAACGATTTTCCTTCACAGCTATTCCACATTTACTTCATTACCAATATTAATTCTCCAAAAAAAATATATCCTTGATTCCTCATTCTTCGGGTATCAACCTACCCTACAACACGTAGTGTCATGTACACATCTTATTACTTCAATGACAACAATTTTCTTTTCAACAAATATAAACTTCTTTTCATGTAAAATTTAAACAAATCTGTGTCACAGTTAGGCAAATTGTTTTGGTCCCAGCCCACTTCACCATAACGGATTCTTCTTAAACATGCCATTCCAATT…	>gnl_Pdu_trscr_assembly_1_1797_Group_26S_Proteasome_regulatory_subunits TTGAGACAAGCATTTTCACAACTTCATAATATTTATATGAGAGCCTCAAAAATAACTTTAAAGCCAAAACAAAATAACAATAGTTTATGCGGCAGTTGCGCAGGCATAACAAGTTACAACGATTTTCCTTCACAGCTATTCCACATTTACTTCATTACCAATATTAATTCTCCAAAAAAAATATATCCTTGATTCCTCATTCTTCGGGTATCAACCTACCCTACAACACGTAGTGTCATGTACACATCTTATTACTTCAATGACAACAATTTTCTTTTCAACAAATATAAACTTCTTTTCATGTAAAATTTAAACAAATCTGTGTCA…
comp2276314_c0_seq1	0	3447	sp|P56701|PSMD2_BOVIN	26S proteasome non-ATPase regulatory subunit 2 OS=Bos taurus GN=PSMD2 PE=1 SV=2	0	3445	sp|Q13200|PSMD2_HUMAN	26S proteasome non-ATPase regulatory subunit 2 OS=Homo sapiens GN=PSMD2 PE=1 SV=3	0	3444	sp|Q5R9I6|PSMD2_PONAB	26S proteasome non-ATPase regulatory subunit 2 OS=Pongo abelii GN=PSMD2 PE=2 SV=1		+			+	Group_26S_Proteasome_regulatory_subunits	AGTTTTTTTTTTTTGTTCACCATGAAAATTTATTAAGATAGGTTTATGGTCAGCACATTCATTCCATTAAATATACAAAATAAACAATAATAGGGCAATGCATTATTTCATCATATCGCAATATCACATTTATAACTATTTCTCAGCTTCTTCATAATCTGGATTCTTTCTTAAGATGACAAATCCTTCTAATATTGGTGTGAGGGAAAGATATTGATCGGTAGCAAGTTCTGCCCTCTCTCCATAGGCCAACAGCACAGGGGTCGTGTGTGTCTGGAATCCTGTGATTGTCTTTGGTTTTCCGGCTTGGCCCACCACATCTACAGCCTGTCCAACTCTAACGGAGACCGGCAGAGGTCGTAATTCTTCGTCAAAAGTGACCAGCATTCTCGGCTGCAT…	>comp2276314_c0_seq1_Group_26S_Proteasome_regulatory_subunits AGTTTTTTTTTTTTGTTCACCATGAAAATTTATTAAGATAGGTTTATGGTCAGCACATTCATTCCATTAAATATACAAAATAAACAATAATAGGGCAATGCATTATTTCATCATATCGCAATATCACATTTATAACTATTTCTCAGCTTCTTCATAATCTGGATTCTTTCTTAAGATGACAAATCCTTCTAATATTGGTGTGAGGGAAAGATATTGATCGGTAGCAAGTTCTGCCCTCTCTCCATAGGCCAACAGCACAGGGGTCGTGTGTGTCTGGAATCCTGTGATTGTCTTTGGTTTTCCGGCTTGGCCCACCACATCTACAGCCTGTCCAACT…
comp2212572_c0_seq1	6.1e-174	1699	sp|O43242|PSMD3_HUMAN	26S proteasome non-ATPase regulatory subunit 3 OS=Homo sapiens GN=PSMD3 PE=1 SV=2	7.7e-174	1698	sp|P14685|PSMD3_MOUSE	26S proteasome non-ATPase regulatory subunit 3 OS=Mus musculus GN=Psmd3 PE=1 SV=3	4.3e-173	1691	sp|Q2KJ46|PSMD3_BOVIN	26S proteasome non-ATPase regulatory subunit 3 OS=Bos taurus GN=PSMD3 PE=2 SV=1	+				+	Group_26S_Proteasome_regulatory_subunits	TCAATTATGTGTGGCCTTATTATTATGAGAAATACTTTATTTTGACATTCAGTACAGCTTCTTTTACGCTTTTAATACCTCTCATATCTTCAAACATGGGATTATCCCATCAAAAATCATAAATTTGCGAAGGTTATATAAGCTTCATATACAATATAATTGTTTTTCAAACTGTCCATACTTTATACATTATATAGTTTCAACAACTGTTGCAAATTTGTCATTTATATATGAATTGTAATCACCTATCGCCATAGCGACCATGGAACTTTTTCCATCAAATTTGAAACGTTTCCATGGTAACGATGCTGCAGGCTGTTTTACAAGTTCAAAAATTAATTTAACACATTTCATACTTATATAATGTTCACATCACTGATGATCAGTTCTCGAAAATAC…	>comp2212572_c0_seq1_Group_26S_Proteasome_regulatory_subunits TCAATTATGTGTGGCCTTATTATTATGAGAAATACTTTATTTTGACATTCAGTACAGCTTCTTTTACGCTTTTAATACCTCTCATATCTTCAAACATGGGATTATCCCATCAAAAATCATAAATTTGCGAAGGTTATATAAGCTTCATATACAATATAATTGTTTTTCAAACTGTCCATACTTTATACATTATATAGTTTCAACAACTGTTGCAAATTTGTCATTTATATATGAATTGTAATCACCTATCGCCATAGCGACCATGGAACTTTTTCCATCAAATTTGAAACGTTTCCATGGTAACGATGCTGCAGGCTGTTTTACAAGTTCAAAAATT…
comp2257975_c0_seq1	2.6e-150	1476	sp|Q15008|PSMD6_HUMAN	26S proteasome non-ATPase regulatory subunit 6 OS=Homo sapiens GN=PSMD6 PE=1 SV=1	8.8e-150	1471	sp|Q99JI4|PSMD6_MOUSE	26S proteasome non-ATPase regulatory subunit 6 OS=Mus musculus GN=Psmd6 PE=1 SV=1	3e-149	1466	sp|Q3T0B2|PSMD6_BOVIN	26S proteasome non-ATPase regulatory subunit 6 OS=Bos taurus GN=PSMD6 PE=2 SV=1		+	+		++	Group_26S_Proteasome_regulatory_subunits	CTAACACAACCCATCCTGTCCAGCACTAGCCCCGCAGTCAACCAAAAAGCGCTGTTGTCATCGTGCCGGTGAAAATGCCTCTTGAAAATTTGGAAGAACAAGGCTTGGAGAAGAACCCAAACCTTGAATTGGCACAATGGAAGTTTCTTCTGGGTACCGAGAAATTCAAGAAAGATGCCAAATTGAAGAACGACTTGATGAAAACCGTAGAAAAAGAGAACATGGCACCATTTTATGAAGAAGTATGCAAAGACCTGGGATGGAAGTTAGATCAGAACCTGTTACAGAAGATGAAAGCAGAAAATGAAGCTGAACTGAAAAGACTTGAAGAGGCTGTGGAAGATGCAGAGAAAAACCTGGGAGAAACTGAAGTCAGAGAATCCTTGTTGACCAAGGCAG…	>comp2257975_c0_seq1_Group_26S_Proteasome_regulatory_subunits CTAACACAACCCATCCTGTCCAGCACTAGCCCCGCAGTCAACCAAAAAGCGCTGTTGTCATCGTGCCGGTGAAAATGCCTCTTGAAAATTTGGAAGAACAAGGCTTGGAGAAGAACCCAAACCTTGAATTGGCACAATGGAAGTTTCTTCTGGGTACCGAGAAATTCAAGAAAGATGCCAAATTGAAGAACGACTTGATGAAAACCGTAGAAAAAGAGAACATGGCACCATTTTATGAAGAAGTATGCAAAGACCTGGGATGGAAGTTAGATCAGAACCTGTTACAGAAGATGAAAGCAGAAAATGAAGCTGAACTGAAAAGACTTGAAGAGGCTGT…
comp1201878_c0_seq1	0.18	85	sp|Q5QXV9|RS8_IDILO	30S ribosomal protein S8 OS=Idiomarina loihiensis (strain ATCC BAA-735 / DSM 15497 / L2-TR) GN=rpsH PE=3 SV=1										+	+		++	candidate_weak homology	TGATATGAGAATTTTAAACGTTTATTCTTTATTTTATCTTCTTGAATAAATAGTACCGTACACATTTATGTCAGCTGAGGACTGCTTCAACATTTCATCCATCGCTCTTGGTCATTCCACTTGTTTTCACCCCTCTGCATAGCGTATCCAGCAGGTTGCCAACCGTTGCCTCCCAGAACATCAGCATTTCTCAGGCGTAAAATTGCAAATGAAGGTTTGTTGTCTTTGAATTCCATTGCAACTCTCCCATAATCACCTTCGAAGTATTTGACTTCAAACTTCAAATCACCGACCGTTTTTTCATCACTTTTATTTCCAGTGAGAAACAGGCTCTGCGACTCCCGGGGTAGGATGGGCAATGAGGCAAGCGTCTGTCTGCTTCCGTATAAGTAGATGATG…	>comp1201878_c0_seq1_candidate_weak homology TGATATGAGAATTTTAAACGTTTATTCTTTATTTTATCTTCTTGAATAAATAGTACCGTACACATTTATGTCAGCTGAGGACTGCTTCAACATTTCATCCATCGCTCTTGGTCATTCCACTTGTTTTCACCCCTCTGCATAGCGTATCCAGCAGGTTGCCAACCGTTGCCTCCCAGAACATCAGCATTTCTCAGGCGTAAAATTGCAAATGAAGGTTTGTTGTCTTTGAATTCCATTGCAACTCTCCCATAATCACCTTCGAAGTATTTGACTTCAAACTTCAAATCACCGACCGTTTTTTCATCACTTTTATTTCCAGTGAGAAACAGGCTCTGCGACTCCCGGGGTAGGATG…
comp2273929_c1_seq1	7.4e-130	1283	sp|P80147|GABT_PIG	4-aminobutyrate aminotransferase, mitochondrial OS=Sus scrofa GN=ABAT PE=1 SV=2	8.4e-129	1273	sp|P80404|GABT_HUMAN	4-aminobutyrate aminotransferase, mitochondrial OS=Homo sapiens GN=ABAT PE=1 SV=3	4.7e-128	1266	sp|P61922|GABT_MOUSE	4-aminobutyrate aminotransferase, mitochondrial OS=Mus musculus GN=Abat PE=1 SV=1	+		+		++		AAAGTGCTTTAACAAATAGTAAATAAATGGTTCTCAGTATATTGAATATTTTTAACAATAAAACATAACAATGACTATAATATGCTAGGGCGATAGGCCTATTATAAATTTCAGAGTAGAAAAAAATCCAGCACATCTGGTATGTAAAAATAGGTTATTGGCAACATCTGACAGCACCTTTAAATTAAAGAAATGTTTAACAAGATGCATATATGAGTTGAAATGAAAAGAATATATAATTTATATTGGCTGCTCGGAGCAGCCTGCTCGTATTTGGCATAAGAAAAATTTGGGAATGTGTCTGAAAAGTTCCTGAACATGACTAATAAATGTAAACCCCAGGTAAAAGTTTAGAAAACAATCAAGTAACGAAAAGTGACATTCATTGCCTGTATACAT…	>comp2273929_c1_seq1 AAAGTGCTTTAACAAATAGTAAATAAATGGTTCTCAGTATATTGAATATTTTTAACAATAAAACATAACAATGACTATAATATGCTAGGGCGATAGGCCTATTATAAATTTCAGAGTAGAAAAAAATCCAGCACATCTGGTATGTAAAAATAGGTTATTGGCAACATCTGACAGCACCTTTAAATTAAAGAAATGTTTAACAAGATGCATATATGAGTTGAAATGAAAAGAATATATAATTTATATTGGCTGCTCGGAGCAGCCTGCTCGTATTTGGCATAAGAAAAATTTGGGAATGTGTCTGAAAAGTTCCTGAACATGACTAATAAATGTAAACCCCAGGTAAAAGTTTAGAAAACAATCAAGTAACGAAAAGTG…
comp1194294_c0_seq1	9.6e-73	744	sp|P49393|RS13_XENLA	40S ribosomal protein S13 OS=Xenopus laevis GN=rps13 PE=3 SV=2	2e-72	741	sp|Q56JX8|RS13_BOVIN	40S ribosomal protein S13 OS=Bos taurus GN=RPS13 PE=2 SV=3	2e-72	741	sp|Q6ITC7|RS13_CHICK	40S ribosomal protein S13 OS=Gallus gallus GN=RPS13 PE=2 SV=3	+		+		++		TTTTTTTTTTTTTTTTTCAATTTCTTTGTTTTTATTGTTTTGTACAAGTCGTAAAGAAATTTACGCGACCAGGGCGGAGGCAGTTGAGGACTCGTACTTCCAGTTAGGTGGCAGCACTCTCCTGGATTTGTAGTATCTGGCCAATCTGTGGATTCTGCTCTCCACCAAGATAAGTCTGAACTTGGAGTCACGGTCCTTCCTGTTCCTTTCCATGTGCTTCCTGATGGCCACAGCCTTCTTGATCAAGTGGTACAAGTCCTCGGGAATGTCGGGGGCAAGTCCCTTGCTCTTCAGGATACGCAGGATCTTGTTTCCAGTGACAAATCGGACCTGGGCAACTCCATGGGAATCCCTGAGGATAACACCAATTTGAGACGGGGTCAATCCCTTTTTGGCGAG…	>comp1194294_c0_seq1 TTTTTTTTTTTTTTTTTCAATTTCTTTGTTTTTATTGTTTTGTACAAGTCGTAAAGAAATTTACGCGACCAGGGCGGAGGCAGTTGAGGACTCGTACTTCCAGTTAGGTGGCAGCACTCTCCTGGATTTGTAGTATCTGGCCAATCTGTGGATTCTGCTCTCCACCAAGATAAGTCTGAACTTGGAGTCACGGTCCTTCCTGTTCCTTTCCATGTGCTTCCTGATGGCCACAGCCTTCTTGATCAAGTGGTACAAGTCCTCGGGAATGTCGGGGGCAAGTCCCTTGCTCTTCAGGATACGCAGGATCTTGTTTCCAGTGACAAATCGGACCTGGGCAACTCCATGGGAATCCCTGAGGATAACACCAATTTGAGACGG…
comp2208016_c0_seq1	2.4e-67	693	sp|P62265|RS14_CRIGR	40S ribosomal protein S14 OS=Cricetulus griseus GN=RPS14 PE=2 SV=3	2.4e-67	693	sp|P62263|RS14_HUMAN	40S ribosomal protein S14 OS=Homo sapiens GN=RPS14 PE=1 SV=3	2.4e-67	693	sp|P62264|RS14_MOUSE	40S ribosomal protein S14 OS=Mus musculus GN=Rps14 PE=1 SV=3			+		+		AGCTTTTTTTGTCTTTTAGATTTTTTTTATTCGCAGTCCATATATTACAATGAAATTACAAACGGCGACCACGACGACCTCCCTTCCTTCTGGTGCAATCAGTGGGAATGGGTGTAACATCCTCAATGCGTCCAATCTTCATTCCAGAACGAGCAAGAGCTCTCAGGGCAGACTGGGCGCCAGGTCCAGGGGTCTTAGTTTTGTTTCCACCAGTAGCACGGAGCTTGATGTGCAGAGCGGTAATTCCAAGGGTTCGGCATCTCTCGGCAACATCCTGGGCAGCCAACATAGCAGCGTAGGGAGAGGCTTCATCACGATCGGCTTTCACCTTCATACCTCCAGTGACACGGCAAATGGTTTCCTTGCCAGAAAGATCAGTAACGTGGACAAATGTGTCGT…	>comp2208016_c0_seq1 AGCTTTTTTTGTCTTTTAGATTTTTTTTATTCGCAGTCCATATATTACAATGAAATTACAAACGGCGACCACGACGACCTCCCTTCCTTCTGGTGCAATCAGTGGGAATGGGTGTAACATCCTCAATGCGTCCAATCTTCATTCCAGAACGAGCAAGAGCTCTCAGGGCAGACTGGGCGCCAGGTCCAGGGGTCTTAGTTTTGTTTCCACCAGTAGCACGGAGCTTGATGTGCAGAGCGGTAATTCCAAGGGTTCGGCATCTCTCGGCAACATCCTGGGCAGCCAACATAGCAGCGTAGGGAGAGGCTTCATCACGATCGGCTTTCACCTTCATACCTCCAGTGACACGGCAAATGGTTTCCTTGCCAGAAAGATCAG…
comp1977957_c0_seq1	3.5e-59	616	sp|Q76I82|RS15A_BOVIN	40S ribosomal protein S15a OS=Bos taurus GN=RPS15A PE=2 SV=1	3.5e-59	616	sp|P62244|RS15A_HUMAN	40S ribosomal protein S15a OS=Homo sapiens GN=RPS15A PE=1 SV=2	3.5e-59	616	sp|P62245|RS15A_MOUSE	40S ribosomal protein S15a OS=Mus musculus GN=Rps15a PE=1 SV=2			+		+		TCTTTTTTTCCTCTCCGCTGTTCATAAGAAGCTGAACAATGGTGCGCATGAACGTGCTGGCAGATGCCTTAAGGTCTATTAACAATGCGGAGAAGCGGGGCAAGAGGCAGGTGCTTATCCGACCCTGCTCCAAGGTCATCGTCAGATTCTTGACTGTCATGATGAAGCACGGTTACATTGGTGAGTTCGAGATCATCGATGATCACAGGTCAGGCAAAATAGTCGTTAACCTCACAGGACGCCTGAACAAGTGTGGTGTAATCAGTCCAAGGTTTGACATTGCCCTGAGAGACATGGAGAAACTGACCACCAACTTATTACCCTCTCGTCAGTTCGGGTTCCTCGTACTCACCACATCTGGCGGAATCATGGACCACGAAGAAGCCAGGAGAAAACACT…	>comp1977957_c0_seq1 TCTTTTTTTCCTCTCCGCTGTTCATAAGAAGCTGAACAATGGTGCGCATGAACGTGCTGGCAGATGCCTTAAGGTCTATTAACAATGCGGAGAAGCGGGGCAAGAGGCAGGTGCTTATCCGACCCTGCTCCAAGGTCATCGTCAGATTCTTGACTGTCATGATGAAGCACGGTTACATTGGTGAGTTCGAGATCATCGATGATCACAGGTCAGGCAAAATAGTCGTTAACCTCACAGGACGCCTGAACAAGTGTGGTGTAATCAGTCCAAGGTTTGACATTGCCCTGAGAGACATGGAGAAACTGACCACCAACTTATTACCCTCTCGTCAGTTCGGGTTCCTCGTACTCACCACATCTGGCGGAATCATGGACCACG…
comp2237053_c0_seq1	3.6e-66	682	sp|Q3T0X6|RS16_BOVIN	40S ribosomal protein S16 OS=Bos taurus GN=RPS16 PE=2 SV=3	3.6e-66	682	sp|P62249|RS16_HUMAN	40S ribosomal protein S16 OS=Homo sapiens GN=RPS16 PE=1 SV=2	3.6e-66	682	sp|P14131|RS16_MOUSE	40S ribosomal protein S16 OS=Mus musculus GN=Rps16 PE=1 SV=4			+		+		TGCTGCTCTTTCCTCTCTGGTGTGATCAGATACAAACATGCCAACCAAAGGTCCACTTCAGTCCGTGCAAGTCTACGGCCGCAAAAAAACCGCGACAGCCGTTGCTCACTGCAAACGAGGCAATGGTTTGATCAAGGTCAATGGCCGTCCCTTGGAGCTCATGGAGCCAGAAATGCTCCGATACAAGCTGCTTGAGCCAGTCCTTCTGCTCGGCAAAGAGAAGTTCTCCGGAGTAGACATCAGGATCCGCGTCAACGGTGGAGGTCACATCGCCCAGATCTACGCCATCAGACAAGCCATCTCCAAGGCCCTTGTTGCTTACTACCAGAAATACGTTGACGAGGCCTCAAAGAAGGAGATCAAGGACATCCTGACCAGTTACGACCGATCTCTGCTTGT…	>comp2237053_c0_seq1 TGCTGCTCTTTCCTCTCTGGTGTGATCAGATACAAACATGCCAACCAAAGGTCCACTTCAGTCCGTGCAAGTCTACGGCCGCAAAAAAACCGCGACAGCCGTTGCTCACTGCAAACGAGGCAATGGTTTGATCAAGGTCAATGGCCGTCCCTTGGAGCTCATGGAGCCAGAAATGCTCCGATACAAGCTGCTTGAGCCAGTCCTTCTGCTCGGCAAAGAGAAGTTCTCCGGAGTAGACATCAGGATCCGCGTCAACGGTGGAGGTCACATCGCCCAGATCTACGCCATCAGACAAGCCATCTCCAAGGCCCTTGTTGCTTACTACCAGAAATACGTTGACGAGGCCTCAAAGAAGGAGATCAAGGACATCCTGACCAG…
comp2220386_c0_seq1	2.1e-70	722	sp|Q8ISP0|RS18_BRABE	40S ribosomal protein S18 OS=Branchiostoma belcheri GN=RPS18 PE=2 SV=1	2.6e-70	721	sp|Q8IT98|RS18_ARGIR	40S ribosomal protein S18 OS=Argopecten irradians GN=RPS18 PE=2 SV=1	1e-68	706	sp|Q3T0R1|RS18_BOVIN	40S ribosomal protein S18 OS=Bos taurus GN=RPS18 PE=2 SV=3			+		+		GGACTGGGGACGAATTTGTTGTAGCCGAGTTCGTTCTCGTGCCGGTTTGGTACTTCCTTTTCCTGTAAACCGCCATCATGACGCTGGTCATCCCAGAGAAGTTCCAGCACATTTTGCGTGTTATGAACACCAACATCGATGGACGCCGTAAGGTGCCATTCGCCATGACCGCCATCAAGGGTATCGGTCGCAGGTTCTCCCACATTGTCTGCAAGAAGGCCGATGTCGACATGACCAAGCGTGCCGGAGAGATGTCTGAGGAGGAGGTAGAAAAGATCATCACAATCGTAGCCAACCCTCGCCAGTACAAGATCCCTGATTGGTTCCTCAACAGACAGAAGGACGTGAAGGACGGTAAATTCAGCCAGGTGATGTCCAACGCCCTGGATAACAAACTTC…	>comp2220386_c0_seq1 GGACTGGGGACGAATTTGTTGTAGCCGAGTTCGTTCTCGTGCCGGTTTGGTACTTCCTTTTCCTGTAAACCGCCATCATGACGCTGGTCATCCCAGAGAAGTTCCAGCACATTTTGCGTGTTATGAACACCAACATCGATGGACGCCGTAAGGTGCCATTCGCCATGACCGCCATCAAGGGTATCGGTCGCAGGTTCTCCCACATTGTCTGCAAGAAGGCCGATGTCGACATGACCAAGCGTGCCGGAGAGATGTCTGAGGAGGAGGTAGAAAAGATCATCACAATCGTAGCCAACCCTCGCCAGTACAAGATCCCTGATTGGTTCCTCAACAGACAGAAGGACGTGAAGGACGGTAAATTCAGCCAGGTGATGTCCA…
comp2201786_c0_seq1	6.3e-53	557	sp|Q32PD5|RS19_BOVIN	40S ribosomal protein S19 OS=Bos taurus GN=RPS19 PE=2 SV=3	6.3e-53	557	sp|P39019|RS19_HUMAN	40S ribosomal protein S19 OS=Homo sapiens GN=RPS19 PE=1 SV=2	6.3e-53	557	sp|Q5R8M9|RS19_PONAB	40S ribosomal protein S19 OS=Pongo abelii GN=RPS19 PE=2 SV=3			+		+		TTTGTCCTCTCTCTCTTTTTTGGCCATCAGCAACACAAGATGCCTGGTGTCAGCGTGAAGGACGTCGACCAACACGAGTTCGTCCATGAACTCGCTGGGTTCTTGAAGAAGTCTGGTAAATTAAAGGTCCCTGACTGGGTAGACATCGTGAAGCTGAGCAAACACAAGGAATTGGCCCCTTACGATGACGACTGGTTCTACACCAGGGCCGCCTCCACTGCTCGCCACTTGTACATTCGCTTCCCAGCTGGAATAGGCGCTTTCTCCAAAATCTACGGAGGACGCAAGAGGAACGGAACATGCCCCAGCCACTTCTGCTTTGCCTCAACATCTGTTGCCCGTAAAGTTCTGCAAGCCCTCGAGGGAGTCAAGATCGTAGAGAAGGACCCCAATGGCGGA…	>comp2201786_c0_seq1 TTTGTCCTCTCTCTCTTTTTTGGCCATCAGCAACACAAGATGCCTGGTGTCAGCGTGAAGGACGTCGACCAACACGAGTTCGTCCATGAACTCGCTGGGTTCTTGAAGAAGTCTGGTAAATTAAAGGTCCCTGACTGGGTAGACATCGTGAAGCTGAGCAAACACAAGGAATTGGCCCCTTACGATGACGACTGGTTCTACACCAGGGCCGCCTCCACTGCTCGCCACTTGTACATTCGCTTCCCAGCTGGAATAGGCGCTTTCTCCAAAATCTACGGAGGACGCAAGAGGAACGGAACATGCCCCAGCCACTTCTGCTTTGCCTCAACATCTGTTGCCCGTAAAGTTCTGCAAGCCCTCGAGGGAGTCAAGATCGTA…
comp2139434_c0_seq1	1.6e-70	723	sp|Q86FP7|RS23_DERVA	40S ribosomal protein S23 OS=Dermacentor variabilis GN=RpS23 PE=2 SV=1	2.1e-70	722	sp|Q9GRJ3|RS23_LUMRU	40S ribosomal protein S23 OS=Lumbricus rubellus GN=RPS23 PE=2 SV=1	1.7e-68	704	sp|Q8T3U2|RS23_DROME	40S ribosomal protein S23 OS=Drosophila melanogaster GN=RpS23 PE=1 SV=1			+		+		ACCAGTCAATTAAAAATCTCGCAACTTCTCGCTTCCTCTCACGTGATCTCTCTCTTTCTACCGACAGTCGCCATCATGGGAAAGCCCAGGGGTCTGCGCACAGCTCGTAAGCTGAAGAACCATCGTCGAGACCAGAGATGGCACGATAAGGACTACAAGAAATCCCATTTGGGAACACGTTGGAAGGCCAACCCCTTCGCTGGTGCCTCTCACGCCAAAGGCATCGTGCTTGAGAAAGTTGGAGTTGAAGCTAAGCAGCCTAACTCTGCCATCAGAAAGTGCGTCCGTGTCCAGTTGATCAAGAACGGCAAGAAGATCACAGCCTTCGTACCCCGTGATGGTTGTCTAAACTATATTGAGGAGAACGATGAAGTACTGGTAGCTGGATTCGGTCGTAAA…	>comp2139434_c0_seq1 ACCAGTCAATTAAAAATCTCGCAACTTCTCGCTTCCTCTCACGTGATCTCTCTCTTTCTACCGACAGTCGCCATCATGGGAAAGCCCAGGGGTCTGCGCACAGCTCGTAAGCTGAAGAACCATCGTCGAGACCAGAGATGGCACGATAAGGACTACAAGAAATCCCATTTGGGAACACGTTGGAAGGCCAACCCCTTCGCTGGTGCCTCTCACGCCAAAGGCATCGTGCTTGAGAAAGTTGGAGTTGAAGCTAAGCAGCCTAACTCTGCCATCAGAAAGTGCGTCCGTGTCCAGTTGATCAAGAACGGCAAGAAGATCACAGCCTTCGTACCCCGTGATGGTTGTCTAAACTATATTGAGGAGAACGATGAAGTACTG…
comp2072973_c0_seq1	9.2e-52	546	sp|Q962Q6|RS24_SPOFR	40S ribosomal protein S24 OS=Spodoptera frugiperda GN=RpS24 PE=2 SV=1	1.9e-51	543	sp|P62847|RS24_HUMAN	40S ribosomal protein S24 OS=Homo sapiens GN=RPS24 PE=1 SV=1	1.9e-51	543	sp|P62848|RS24_MESAU	40S ribosomal protein S24 OS=Mesocricetus auratus GN=RPS24 PE=3 SV=1			+		+		CGTTTTTTTGGTGTTACTTTCACATTTTTTATTGACAATAATATACAGGAAAATGTGATGCCAAGGACGCTTCTGGGTTTTTACTTCTTGCCAGCTCCGATCTTGGACTTGGCAGTACCACGGACCTTCTTCTGTCTGTTCTTTCTTTCCTTCCTCTGCTTTCTTGTGGGTTTCTTGATTTCCATCAAACCATGCCTGCACAACCTGTATTTGGGCTCGAATTTCTTAGCAAAGTCCAAGCTATCGTAGATAAGAGCAAAGCCAGTTGTCTTTCCACCGCCAAACTGTGTTCGGAATCCGAAGGCAAAGATGACATCGGGAGTCGTCTTGTACATGCGCGCAAGCTTCTCCCTGATCTCAGTCTTGGCGACTGTGGCACGGCCGGGATGCAGCACATCC…	>comp2072973_c0_seq1 CGTTTTTTTGGTGTTACTTTCACATTTTTTATTGACAATAATATACAGGAAAATGTGATGCCAAGGACGCTTCTGGGTTTTTACTTCTTGCCAGCTCCGATCTTGGACTTGGCAGTACCACGGACCTTCTTCTGTCTGTTCTTTCTTTCCTTCCTCTGCTTTCTTGTGGGTTTCTTGATTTCCATCAAACCATGCCTGCACAACCTGTATTTGGGCTCGAATTTCTTAGCAAAGTCCAAGCTATCGTAGATAAGAGCAAAGCCAGTTGTCTTTCCACCGCCAAACTGTGTTCGGAATCCGAAGGCAAAGATGACATCGGGAGTCGTCTTGTACATGCGCGCAAGCTTCTCCCTGATCTCAGTCTTGGCGACTGTGGCA…
comp2197446_c0_seq1	2e-113	1128	sp|Q3T169|RS3_BOVIN	40S ribosomal protein S3 OS=Bos taurus GN=RPS3 PE=2 SV=1	2e-113	1128	sp|P23396|RS3_HUMAN	40S ribosomal protein S3 OS=Homo sapiens GN=RPS3 PE=1 SV=2	2e-113	1128	sp|Q0Z8U2|RS3_PIG	40S ribosomal protein S3 OS=Sus scrofa GN=RPS3 PE=1 SV=1			+		+		TGTTGCTCTTTTCCAAGCCATCCAAAATGGCGGCACAGGTCTCCAAGAAAAGGAAGTTTGTCAACGATGGAGTTTTCAAGGCTGAGCTGAACGAATTCTTCACCAGAGAACTGGCTGAGGATGGCTACAGTGGTGTTGAAGTGCGAGTGACCCCCACCCGTACTGAAATCATCATCCTTGCTACCAGGACCCAAAATGTTCTGGGAGAGAAGGGACGTCGCATCCGCGAATTAACCTCTGTCGTCCAGAAGAGGTTCAACTTCCAAGAGGGCACCGTTGAATTGTACGCTGAAAAGGTTGCCACCCGTGGTCTTTGCGCCATTGCCCAGGCTGAGTCCCTCCGATACAAGCTTATTGGAGGTCTCGCTGTCAGAAGGGCCTGCTATGGAGTTCTGCGAT…	>comp2197446_c0_seq1 TGTTGCTCTTTTCCAAGCCATCCAAAATGGCGGCACAGGTCTCCAAGAAAAGGAAGTTTGTCAACGATGGAGTTTTCAAGGCTGAGCTGAACGAATTCTTCACCAGAGAACTGGCTGAGGATGGCTACAGTGGTGTTGAAGTGCGAGTGACCCCCACCCGTACTGAAATCATCATCCTTGCTACCAGGACCCAAAATGTTCTGGGAGAGAAGGGACGTCGCATCCGCGAATTAACCTCTGTCGTCCAGAAGAGGTTCAACTTCCAAGAGGGCACCGTTGAATTGTACGCTGAAAAGGTTGCCACCCGTGGTCTTTGCGCCATTGCCCAGGCTGAGTCCCTCCGATACAAGCTTATTGGAGGTCTCGCTGTCAGAAGGG…
comp2279272_c0_seq1	2.7e-116	1155	sp|Q95V34|RS4_SPOFR	40S ribosomal protein S4 OS=Spodoptera frugiperda GN=RpS4 PE=2 SV=1	1.5e-115	1148	sp|Q5UAP0|RS4_BOMMO	40S ribosomal protein S4 OS=Bombyx mori GN=RpS4 PE=2 SV=1	3.6e-112	1116	sp|Q4PMB3|RS4_IXOSC	40S ribosomal protein S4 OS=Ixodes scapularis GN=RpS4 PE=2 SV=1				+	+		GTTTTTTTTTTTGGTTTTTTCAATTTTTTTTTATTTGAGTCTCATGACATCTTTACAGTCTCAATAGATGTTGGTGGACCGTCCTTTTAATTTATTGGTTCTTGGAGGCGATTCTTCTGTCTCTCTCCTCAGCGATGGTCAGTCTGACTCCCTTGCCTTGAGGAAGTGATACCCAAGCCTTAGTTCCCTTTCCGATGATAAACACATTGTTCAACCTAGTAGCAAAAGTGTGTCCCGCGGCGTCACGGATGTGTACGATGTCGAATGATCCTGGATGACGTTCCCGATGAGTGACGGTTCCGACACGACCCAAGTTATGGCCGCCAGTGATCATGCAAAGGTTACCAGAATCAAACTTGATGAAGTCGCTGATCTTGCTGGTGGCAATGTCGACACGAA…	>comp2279272_c0_seq1 GTTTTTTTTTTTGGTTTTTTCAATTTTTTTTTATTTGAGTCTCATGACATCTTTACAGTCTCAATAGATGTTGGTGGACCGTCCTTTTAATTTATTGGTTCTTGGAGGCGATTCTTCTGTCTCTCTCCTCAGCGATGGTCAGTCTGACTCCCTTGCCTTGAGGAAGTGATACCCAAGCCTTAGTTCCCTTTCCGATGATAAACACATTGTTCAACCTAGTAGCAAAAGTGTGTCCCGCGGCGTCACGGATGTGTACGATGTCGAATGATCCTGGATGACGTTCCCGATGAGTGACGGTTCCGACACGACCCAAGTTATGGCCGCCAGTGATCATGCAAAGGTTACCAGAATCAAACTTGATGAAGTCGCTGATCTTGC…
comp2257415_c0_seq1	1.4e-103	1035	sp|Q9BMX5|RS6_APLCA	40S ribosomal protein S6 OS=Aplysia californica GN=RPS6 PE=2 SV=1	2.9e-96	966	sp|Q90YR8|RS6_ICTPU	40S ribosomal protein S6 OS=Ictalurus punctatus GN=rps6 PE=2 SV=1	3.7e-96	965	sp|P62753|RS6_HUMAN	40S ribosomal protein S6 OS=Homo sapiens GN=RPS6 PE=1 SV=1			+		+		TAGCTCCGAGAACTCTCGCCGGAAGTCGGCCTTTTTATCTAGCCCGCTGTGGATGGTGCTTACTGTGCACTAACATGAAGTTGAACATCTCATACCCGGCCACAGGGTGCCAAAAGCTCCTGGAAGTTGACGATGAGCGCAAGTTGAGAGCATTCTACGACAAAAGGATCTCTGCTGAAGTCGGAGCTGATTCTCTCGGAGATGAGTGGAAGGGCTACGTCGTGCGAATTGGAGGTGGCAATGACAAACAGGGCTTCCCCATGAAGCAGGGTGTGCTCACCACTAGTCGTGTCCGTCTTTTGCTGAGCAAGGGACACAGTTGTTACAGACCCCGTCGTACTGGAGAGCGTCATCGACGATCTGTCCGTGGATGCATTGTTGACGGAAATTTGTCTGTGC…	>comp2257415_c0_seq1 TAGCTCCGAGAACTCTCGCCGGAAGTCGGCCTTTTTATCTAGCCCGCTGTGGATGGTGCTTACTGTGCACTAACATGAAGTTGAACATCTCATACCCGGCCACAGGGTGCCAAAAGCTCCTGGAAGTTGACGATGAGCGCAAGTTGAGAGCATTCTACGACAAAAGGATCTCTGCTGAAGTCGGAGCTGATTCTCTCGGAGATGAGTGGAAGGGCTACGTCGTGCGAATTGGAGGTGGCAATGACAAACAGGGCTTCCCCATGAAGCAGGGTGTGCTCACCACTAGTCGTGTCCGTCTTTTGCTGAGCAAGGGACACAGTTGTTACAGACCCCGTCGTACTGGAGAGCGTCATCGACGATCTGTCCGTGGATGCATTG…
comp2217905_c0_seq1	5.9e-89	897	sp|O76756|RS8_APIME	40S ribosomal protein S8 OS=Apis mellifera GN=RpS8 PE=2 SV=2	7.5e-89	896	sp|Q5E958|RS8_BOVIN	40S ribosomal protein S8 OS=Bos taurus GN=RPS8 PE=2 SV=3	7.5e-89	896	sp|P62241|RS8_HUMAN	40S ribosomal protein S8 OS=Homo sapiens GN=RPS8 PE=1 SV=2			+		+		TAGGCTTTTCACGTTTGATCCGCCATCATGGGTATCTCCCGAGACAAGTGGCATAAGAGGAGGAAGACCGGAGGTCGTCAGAACCCCCTCCGTAAGAAGAGGAAGTTCGAACTCGGTCGTCCTGCCGCTAACACCAAGATTGGTCCAAAGAGGGTGCACACAGTTAGAACCAGAGGAGGCAACACAAAATACAGAGCCCTCCGTCTTGACACTGGAAACTTCTCCTGGGGATCTGAGGCTCAAACCCGCCGTACCCGTATCATTGATGTCTTGTACAATGCCAGCAACAATGAGTTGGTGAGAACGAAAACCCTGGTGAAGAACGCCATCATCCAAGTAGATGCCACCCCATTCCGTCAGTGGTACGAGAGCCACTACACACTGCCCCTCGGAAGGAAG…	>comp2217905_c0_seq1 TAGGCTTTTCACGTTTGATCCGCCATCATGGGTATCTCCCGAGACAAGTGGCATAAGAGGAGGAAGACCGGAGGTCGTCAGAACCCCCTCCGTAAGAAGAGGAAGTTCGAACTCGGTCGTCCTGCCGCTAACACCAAGATTGGTCCAAAGAGGGTGCACACAGTTAGAACCAGAGGAGGCAACACAAAATACAGAGCCCTCCGTCTTGACACTGGAAACTTCTCCTGGGGATCTGAGGCTCAAACCCGCCGTACCCGTATCATTGATGTCTTGTACAATGCCAGCAACAATGAGTTGGTGAGAACGAAAACCCTGGTGAAGAACGCCATCATCCAAGTAGATGCCACCCCATTCCGTCAGTGGTACGAGAGCCACTAC…
comp2271916_c0_seq1	2.8e-201	1957	sp|P85968|6PGD_RAT	6-phosphogluconate dehydrogenase, decarboxylating OS=Rattus norvegicus GN=Pgd PE=1 SV=1	7.4e-201	1953	sp|P52209|6PGD_HUMAN	6-phosphogluconate dehydrogenase, decarboxylating OS=Homo sapiens GN=PGD PE=1 SV=3	9.4e-201	1952	sp|Q9DCD0|6PGD_MOUSE	6-phosphogluconate dehydrogenase, decarboxylating OS=Mus musculus GN=Pgd PE=1 SV=3		+			+		GTATAACGGAACGGAATGTCATTGTCATTGCAGGAAGGGACTATAAACCGACTGTTGTACCCTGCATATTTCCAAAATATTACAGTGGCAAAACTATTTACCTTCAGATACAGGCACAATACCTTACTTTCTTACTACAAGAAGTGGATGTGCAGGCTAAACCTGTCCTTGATCGAACTGGATTTATATAAACTAGTTTCTCAACAATTTTAAGAGAGGTATTCCACATAAACTACGCTATTAAATACCGTTTAGTGGGACACGATTGTCAAATAACGACTATTTGAACATTTCATATTCTCTATTTCTATCGTTCATTGTACAACTACAATCATTTAAATGCACTTGAGTGTAAATTCTAATTCTGACATGTATTTCTAGATACATCTAAACTAGGAA…	>comp2271916_c0_seq1 GTATAACGGAACGGAATGTCATTGTCATTGCAGGAAGGGACTATAAACCGACTGTTGTACCCTGCATATTTCCAAAATATTACAGTGGCAAAACTATTTACCTTCAGATACAGGCACAATACCTTACTTTCTTACTACAAGAAGTGGATGTGCAGGCTAAACCTGTCCTTGATCGAACTGGATTTATATAAACTAGTTTCTCAACAATTTTAAGAGAGGTATTCCACATAAACTACGCTATTAAATACCGTTTAGTGGGACACGATTGTCAAATAACGACTATTTGAACATTTCATATTCTCTATTTCTATCGTTCATTGTACAACTACAATCATTTAAATGCACTTGAGTGTAAATTCTAATTCTGACATGTATTTC…
comp2263508_c0_seq1	3.6e-121	1201	sp|Q9DG68|RLA0_RANSY	60S acidic ribosomal protein P0 OS=Rana sylvatica GN=RPLP0 PE=2 SV=1	9.8e-119	1178	sp|Q95140|RLA0_BOVIN	60S acidic ribosomal protein P0 OS=Bos taurus GN=RPLP0 PE=2 SV=3	9.8e-119	1178	sp|Q29214|RLA0_PIG	60S acidic ribosomal protein P0 OS=Sus scrofa GN=RPLP0 PE=1 SV=2		+			+	Group_60S_acidic_ribosomal_proteins	TTTTTTTTTTTTTTTTTTTCCTTCTGTTTCTTTTATTTAATCTTTCAACAACGTTGTTAACTTATAACGACGTGATTCGCATCGTGCCATAGGTATAATCCGGGCACTTTGCTTCAGTCCTTTCAAGTGCAACATTGCGAGAGCAGATCTTCCGATAGTATCATAGATGATATCATAGACGGTGTACTTTTGATACAGGAAGTAGTACAGGAAGCGGAACTCTCTAGTCAAAGAGACCGAATCCCATATCGTCATCAGATTCCTCCGACTCTTCTTTCTTCTCCTCGGCCTTGGCAGCAGGAGCAGCTGAATCTGCTGCTGGGGCAGCGGCTGCGGCAACGGCGGCAAACTTGGACGGATCCTTGAGGAATTCCTTCATCTGTTCAGCTTCCTTGAATT…	>comp2263508_c0_seq1_Group_60S_acidic_ribosomal_proteins TTTTTTTTTTTTTTTTTTTCCTTCTGTTTCTTTTATTTAATCTTTCAACAACGTTGTTAACTTATAACGACGTGATTCGCATCGTGCCATAGGTATAATCCGGGCACTTTGCTTCAGTCCTTTCAAGTGCAACATTGCGAGAGCAGATCTTCCGATAGTATCATAGATGATATCATAGACGGTGTACTTTTGATACAGGAAGTAGTACAGGAAGCGGAACTCTCTAGTCAAAGAGACCGAATCCCATATCGTCATCAGATTCCTCCGACTCTTCTTTCTTCTCCTCGGCCTTGGCAGCAGGAGCAGCTGAATCTGCTGCTGGGGCAGCGGCTGCGGCAACGG…
comp1958245_c0_seq1	9.8e-32	357	sp|P08570|RLA1_DROME	60S acidic ribosomal protein P1 OS=Drosophila melanogaster GN=RpLP1 PE=1 SV=2	1.2e-28	328	sp|P02402|RLA1_ARTSA	60S acidic ribosomal protein P1 OS=Artemia salina PE=1 SV=2	1.5e-28	327	sp|P91913|RLA1_CAEEL	60S acidic ribosomal protein P1 OS=Caenorhabditis elegans GN=rla-1 PE=3 SV=2	+		+	+	+++	Group_60S_acidic_ribosomal_proteins	TTTTTTTTTTTTTTTTTTTTACTTGTTACTTGGTTTTTTTATTGCTTGTATATAAATACACTTTTTGTAAAAACAAACAAGCATTTGTATATGGAATGAAGACCCTTTTGGTCCCGTTTAATCATCGAAGAGACCCATGCCCATGTCTCCGTCGGATTCCTCGGATTCGGACTCAACCTTCTTCTTCTTCTCTTCTTTGGCAGCTCCTCCAGCATCAGCAGCGGCAGCTGGGGCGGCGGCGGCAGCAGCAGGGGCAGCAGAGGCACTTCCTACGTTGGTGATGAGGTCCTTGATGTTCACGCCAGTCAGGGCCTTGGCGAAGAGACTGGGCCAGATGGGCTCAACGTCCACATTGGCAGCCTTCAGGATGGTGGTGATCTTCTCAGAGGTGATGGCTAC…	>comp1958245_c0_seq1_Group_60S_acidic_ribosomal_proteins TTTTTTTTTTTTTTTTTTTTACTTGTTACTTGGTTTTTTTATTGCTTGTATATAAATACACTTTTTGTAAAAACAAACAAGCATTTGTATATGGAATGAAGACCCTTTTGGTCCCGTTTAATCATCGAAGAGACCCATGCCCATGTCTCCGTCGGATTCCTCGGATTCGGACTCAACCTTCTTCTTCTTCTCTTCTTTGGCAGCTCCTCCAGCATCAGCAGCGGCAGCTGGGGCGGCGGCGGCAGCAGCAGGGGCAGCAGAGGCACTTCCTACGTTGGTGATGAGGTCCTTGATGTTCACGCCAGTCAGGGCCTTGGCGAAGAGACTGGGCCAGATGGGCTC…
comp2257585_c0_seq1	1.1e-85	866	sp|Q9VTP4|R10AB_DROME	60S ribosomal protein L10a-2 OS=Drosophila melanogaster GN=RpL10Ab PE=1 SV=2	1.9e-83	845	sp|Q7ZYS8|RL10A_XENLA	60S ribosomal protein L10a OS=Xenopus laevis GN=rpl10a PE=2 SV=1	3.1e-83	843	sp|Q5E9E6|RL10A_BOVIN	60S ribosomal protein L10a OS=Bos taurus GN=RPL10A PE=2 SV=3		+			+	Group 60S ribosomal proteins	TTCCTTTTCCATCTCAACCACGCCGCCAAGATGAGTAAGCTGTCAAGAGAGCTGCTCAATGACTCCCTCGCCAATGTGCTTAAGCACAGTCAGGAGAAGAAGAGGAAGTTCCAGGAAACCGTGGAACTCCAAATCGTCCTGAAGAATTACGATCCCCAAAAGGACAAGCGTTTCTCTGGCACCGTCAAGTTGAGGCACATCCCCAGGCCCAAGATGTCCGTTTGCGTCCTTGGAGACCAACAGCATTGTGACGAAGCCAAGGCCAACAATGTTGCCTGCATGGATGTTGATGCTTTGAAGAAGCTGAACAAGAACAAGAAACTTGTCAAGAAGCTTAGCAAATCCTATGATGCGTTTTTGGCTTCTGACTCCCTCATCAAGCAGATCCCCAGGATCTTG…	>comp2257585_c0_seq1_Group 60S ribosomal proteins TTCCTTTTCCATCTCAACCACGCCGCCAAGATGAGTAAGCTGTCAAGAGAGCTGCTCAATGACTCCCTCGCCAATGTGCTTAAGCACAGTCAGGAGAAGAAGAGGAAGTTCCAGGAAACCGTGGAACTCCAAATCGTCCTGAAGAATTACGATCCCCAAAAGGACAAGCGTTTCTCTGGCACCGTCAAGTTGAGGCACATCCCCAGGCCCAAGATGTCCGTTTGCGTCCTTGGAGACCAACAGCATTGTGACGAAGCCAAGGCCAACAATGTTGCCTGCATGGATGTTGATGCTTTGAAGAAGCTGAACAAGAACAAGAAACTTGTCAAGAAGCTTAGCAAATCCTATG…
comp2241299_c0_seq1	1.5e-76	780	sp|Q3T087|RL11_BOVIN	60S ribosomal protein L11 OS=Bos taurus GN=RPL11 PE=2 SV=3	1.5e-76	780	sp|Q6QMZ8|RL11_CHILA	60S ribosomal protein L11 OS=Chinchilla lanigera GN=RPL11 PE=2 SV=3	1.5e-76	780	sp|P62913|RL11_HUMAN	60S ribosomal protein L11 OS=Homo sapiens GN=RPL11 PE=1 SV=2			+		+	Group 60S ribosomal proteins	GCTTTTTTTTTTTGATTTTTAATTTTTTTTATTTGCTTATTAACAATGATTCCCATTACTTTCCAGGTAGGATGACGCCATCATACTTTTGCTGGAACCATTTCATAGCTTCTTCCTTTGGTACTTTGTGTTTGCACCCAATGACGCCCTGTCGTCTCCTTCTGTGTGGGATATTGAAGCCTGAACGACCAAGAACAACGTAGAAGTCCATTCCGTAGATTCCAATTCCGGGATCGTACTTGATTCCAAGATCAATGTGTTCCTGGATTCCAAAGCCAAAGTTTCCGGAATCACTGAAGTTGTTTTTCCTCAATTCGTATTCACGAACCTTGAGTCCCCTCTCCAAGATCTCCTCGGCCTTAGCTCCTCTGACTGTGCAGTGGACGGCGATCTTCTCGT…	>comp2241299_c0_seq1_Group 60S ribosomal proteins GCTTTTTTTTTTTGATTTTTAATTTTTTTTATTTGCTTATTAACAATGATTCCCATTACTTTCCAGGTAGGATGACGCCATCATACTTTTGCTGGAACCATTTCATAGCTTCTTCCTTTGGTACTTTGTGTTTGCACCCAATGACGCCCTGTCGTCTCCTTCTGTGTGGGATATTGAAGCCTGAACGACCAAGAACAACGTAGAAGTCCATTCCGTAGATTCCAATTCCGGGATCGTACTTGATTCCAAGATCAATGTGTTCCTGGATTCCAAAGCCAAAGTTTCCGGAATCACTGAAGTTGTTTTTCCTCAATTCGTATTCACGAACCTTGAGTCCCCTCTCCAAGAT…
comp2245603_c0_seq1	2.4e-67	693	sp|P61284|RL12_BOVIN	60S ribosomal protein L12 OS=Bos taurus GN=RPL12 PE=2 SV=1	2.4e-67	693	sp|E2RR58|RL12_CANLF	60S ribosomal protein L12 OS=Canis lupus familiaris GN=RPL12 PE=1 SV=1	2.4e-67	693	sp|P30050|RL12_HUMAN	60S ribosomal protein L12 OS=Homo sapiens GN=RPL12 PE=1 SV=1			+		+	Group 60S ribosomal proteins	TCTGGCTTTTCCGGTTACTTTACCGTCGGTCTGGTGCAACAAGTTTTGGTCGTCCCTAATCTGGGTTCATCCAACACCAAGGCCGTCTTGATTTAAGTTCAAACTTCACGAACATCAACAAAAATGCCTCCCAAGTTCGATCCCACTGAGATCAAAGTCGTCTACTTGAGGGCTGTAGGAGGAGAGGTCGGCGCCACTGCCACTCTTGCCCCCAAGATCGGTCCCCTCGGTCTGTCCCCCAAGAAGGTCGGAGATGACATCGCCAAAGCCACCGGAGACTGGAAGGGTTTGAGGATCACCGTGAAATTGGTCATCCAGAACAGACAGGCCAAGGTAGAGGTCGTGCCCTCAGCGTCATCCCTGGTCATCAAGGCCCTGAAGGAACCCCCAAGGGACAGG…	>comp2245603_c0_seq1_Group 60S ribosomal proteins TCTGGCTTTTCCGGTTACTTTACCGTCGGTCTGGTGCAACAAGTTTTGGTCGTCCCTAATCTGGGTTCATCCAACACCAAGGCCGTCTTGATTTAAGTTCAAACTTCACGAACATCAACAAAAATGCCTCCCAAGTTCGATCCCACTGAGATCAAAGTCGTCTACTTGAGGGCTGTAGGAGGAGAGGTCGGCGCCACTGCCACTCTTGCCCCCAAGATCGGTCCCCTCGGTCTGTCCCCCAAGAAGGTCGGAGATGACATCGCCAAAGCCACCGGAGACTGGAAGGGTTTGAGGATCACCGTGAAATTGGTCATCCAGAACAGACAGGCCAAGGTAGAGGTCGTGCCCT…
comp2204754_c0_seq1	2.1e-68	703	sp|Q4R8Z2|RL13A_MACFA	60S ribosomal protein L13a OS=Macaca fascicularis GN=RPL13A PE=2 SV=3	2.7e-68	702	sp|Q3SZ90|RL13A_BOVIN	60S ribosomal protein L13a OS=Bos taurus GN=RPL13A PE=2 SV=3	2.7e-68	702	sp|P40429|RL13A_HUMAN	60S ribosomal protein L13a OS=Homo sapiens GN=RPL13A PE=1 SV=2		+			+	Group 60S ribosomal proteins	TGCCCTTTTCTATTTCCGGATGTCCGACGTGAAATGTCACGTGTGAACCCCTGATCGGTCTTTTCTACAACATGGGTTTCCAAACGCAACCCTTGATTATAGATGCAAGGGGCCATCTCCTTGGCCGCTTGGCATCTATCGTGGCCAAGACCATCCTGCAAGGCCAGAGGGTGGTTGTGGTAAGATGTGAAGGAATCGTCATTTCTGGCAGTTTCCACAGGAGCAAATTGAAGTACCTTGCCTTCCTGCGCAAGAGAATGAACACCAACCCCAGCCGTGGACCTTACCACTTCCGCGCTCCCAGCAAGATCTTGTGGAGGACCATCAGAGGAATGTTGCCCCACAAACTCCACCGCGGAAAGGAGGCTCTTGAGCGCTTCAAGGCTTTTGAGGGAATCC…	>comp2204754_c0_seq1_Group 60S ribosomal proteins TGCCCTTTTCTATTTCCGGATGTCCGACGTGAAATGTCACGTGTGAACCCCTGATCGGTCTTTTCTACAACATGGGTTTCCAAACGCAACCCTTGATTATAGATGCAAGGGGCCATCTCCTTGGCCGCTTGGCATCTATCGTGGCCAAGACCATCCTGCAAGGCCAGAGGGTGGTTGTGGTAAGATGTGAAGGAATCGTCATTTCTGGCAGTTTCCACAGGAGCAAATTGAAGTACCTTGCCTTCCTGCGCAAGAGAATGAACACCAACCCCAGCCGTGGACCTTACCACTTCCGCGCTCCCAGCAAGATCTTGTGGAGGACCATCAGAGGAATGTTGCCCCACAAACT…
comp2224040_c0_seq1	1e-43	470	sp|O46160|RL14_LUMRU	60S ribosomal protein L14 OS=Lumbricus rubellus GN=RPL14 PE=3 SV=1	8.7e-40	433	sp|Q9CR57|RL14_MOUSE	60S ribosomal protein L14 OS=Mus musculus GN=Rpl14 PE=1 SV=3	1.1e-39	432	sp|A1XQU3|RL14_PIG	60S ribosomal protein L14 OS=Sus scrofa GN=RPL14 PE=1 SV=1			+		+	Group 60S ribosomal proteins	TTTTTTTTTTTTAGGTTTTTTCCAATTTTTTTTTTTTGGTTTTATTTTTTTTATTTTGTGAATGATGTGTACAGCTTATTTCTTCTTGGGCTTGGCTGATCTCTTGGCAGATGGCTTCTTGCCGGCCTTCTCTTTCTTCATCTTGCCAAACTGCGTGTTGATCAGGCGGTTTCTAGCCTGCTTGGCCTTCATAAGCTTAAATCGCTCAAAGTCGGTGATGTTGGCCCTCTTTTGCCTCTGTTCCAACTTCTTGGACCAGGTGGTCTCGCCCCACTTCTTTGTGACCTCAGCCTTTTCCCAGGCCTTCTTGATGGAGCCGGTGCGGGCGGAGGGTCCGATCTTCACAACAAAGTCTGTCAAGTGCATCTGCTTGAAGGACAAGCACTTGCGGGCAACGCC…	>comp2224040_c0_seq1_Group 60S ribosomal proteins TTTTTTTTTTTTAGGTTTTTTCCAATTTTTTTTTTTTGGTTTTATTTTTTTTATTTTGTGAATGATGTGTACAGCTTATTTCTTCTTGGGCTTGGCTGATCTCTTGGCAGATGGCTTCTTGCCGGCCTTCTCTTTCTTCATCTTGCCAAACTGCGTGTTGATCAGGCGGTTTCTAGCCTGCTTGGCCTTCATAAGCTTAAATCGCTCAAAGTCGGTGATGTTGGCCCTCTTTTGCCTCTGTTCCAACTTCTTGGACCAGGTGGTCTCGCCCCACTTCTTTGTGACCTCAGCCTTTTCCCAGGCCTTCTTGATGGAGCCGGTGCGGGCGGAGGGTCCGATCTTCACAACA…
comp2243933_c0_seq1	1.1e-73	753	sp|A8CAG3|RL17_PHLPP	60S ribosomal protein L17 OS=Phlebotomus papatasi GN=RpL17 PE=2 SV=1	2.8e-73	749	sp|Q3T025|RL17_BOVIN	60S ribosomal protein L17 OS=Bos taurus GN=RPL17 PE=2 SV=3	2.8e-73	749	sp|P24049|RL17_RAT	60S ribosomal protein L17 OS=Rattus norvegicus GN=Rpl17 PE=2 SV=3			+		+	Group 60S ribosomal proteins	TATGCTTTTTCCGGTGTGGTTGAGCGAGTTACGGCCTAAAGATGACTCGCTATTCTCTCGACCCCGAGAATTCAACCAAATCTGCCAAGGCTCGAGGGAGTCACCTTCGAGTTCATTTCAAGAACACTCGCGAGACAGCTCACGCCATCAAGAGAATGCACGTGCGCAGGGCCACAGGATTCCTCAAGAATGTTGTAGAGAAGAAAGAATGTGTGCCATTCAGGCGATTCAATGGCGGTGTTGGCAGGTGTGCTCAGGCCAAGAACTGGAAGACCACCCAAGGCCGTTGGCCCAAGAAGAGCGCCCAGTTCCTCCTTCAGTTGTTGAAGAATGCCGAGAGCAATGCTGAGTACAATGGTCTTGACACTGACCATTTGGTGATCGAGCACATCCAGGTCA…	>comp2243933_c0_seq1_Group 60S ribosomal proteins TATGCTTTTTCCGGTGTGGTTGAGCGAGTTACGGCCTAAAGATGACTCGCTATTCTCTCGACCCCGAGAATTCAACCAAATCTGCCAAGGCTCGAGGGAGTCACCTTCGAGTTCATTTCAAGAACACTCGCGAGACAGCTCACGCCATCAAGAGAATGCACGTGCGCAGGGCCACAGGATTCCTCAAGAATGTTGTAGAGAAGAAAGAATGTGTGCCATTCAGGCGATTCAATGGCGGTGTTGGCAGGTGTGCTCAGGCCAAGAACTGGAAGACCACCCAAGGCCGTTGGCCCAAGAAGAGCGCCCAGTTCCTCCTTCAGTTGTTGAAGAATGCCGAGAGCAATGCTGA…
gnl_Pdu_trscr_assembly_1_18157	7.6e-80	811	sp|P36241|RL19_DROME	60S ribosomal protein L19 OS=Drosophila melanogaster GN=RpL19 PE=1 SV=2	1.6e-77	789	sp|Q6P5L3|RL19_DANRE	60S ribosomal protein L19 OS=Danio rerio GN=rpl19 PE=2 SV=1	1.6e-77	789	sp|Q7ZYS1|RL19_XENLA	60S ribosomal protein L19 OS=Xenopus laevis GN=rpl19 PE=2 SV=1			+		+	Group 60S ribosomal proteins	GGAATTCCCGGGATGAAACCACCAACATGAGTACACTGAGGCTTCAGAAGAGGCTGGCCGCAGCCGTACTCAAATGCGGCAAAAACAAAATCTGGTTGGATCCCAATGAGACAAATGAAATTGCCAACGCCAACTCAAGGCAGAACATCCGTAAGCTGATCAAGGATGGTCTTATCATCAGGAAGCCAGTGGCTGTCCACTCCAGGGCTCGCGTCAGGAAGAACACGGAAGCACGCAGAAAGGGACGTCATACAGGAACCGGAAAGAGGAAGGGTACAGCCAACGCCCGTATGCCCCAGAAGATTCTTTGGATGCGCCGTATGCGAGTGTTGCGTCGTCTGCTGAAGAAGTACAGGGAAGCCAAGAAGATCGACCGTCACTTGTACCACGAGTTGTACT…	>gnl_Pdu_trscr_assembly_1_18157_Group 60S ribosomal proteins GGAATTCCCGGGATGAAACCACCAACATGAGTACACTGAGGCTTCAGAAGAGGCTGGCCGCAGCCGTACTCAAATGCGGCAAAAACAAAATCTGGTTGGATCCCAATGAGACAAATGAAATTGCCAACGCCAACTCAAGGCAGAACATCCGTAAGCTGATCAAGGATGGTCTTATCATCAGGAAGCCAGTGGCTGTCCACTCCAGGGCTCGCGTCAGGAAGAACACGGAAGCACGCAGAAAGGGACGTCATACAGGAACCGGAAAGAGGAAGGGTACAGCCAACGCCCGTATGCCCCAGAAGATTCTTTGGATGCGCCGTATGCGAGTGTTGCGTCGT…
comp2250906_c0_seq2	2.4e-51	542	sp|Q24JY1|RL23A_BOVIN	60S ribosomal protein L23a OS=Bos taurus GN=RPL23A PE=2 SV=1	2.4e-51	542	sp|P62750|RL23A_HUMAN	60S ribosomal protein L23a OS=Homo sapiens GN=RPL23A PE=1 SV=1	2.4e-51	542	sp|P62751|RL23A_MOUSE	60S ribosomal protein L23a OS=Mus musculus GN=Rpl23a PE=1 SV=1			+		+	Group 60S ribosomal proteins	GATGCATCTATGGATGTATGCCTTTAAATCCTGTATGCATGCACTGTGGTAAGTTTACATATCATGACGGGCTAACTGACCCATTTACCACCTTCCCTCCCATCTTCCTCTTTTTTTTTTTTTTTTGGTTTTTCTTTTTTTATTTGTTTGCTTAAGGATATTATAACAGCCCCAATGTTTAGATGATTCCGATCTTGTTAGCAACATCCAAAGCATCCAAGTCAGGTGCCAATCGTACGTAGGCCTTCTTCTCGCCATCAGGTCTGATGAGAGTGTTGACCTTCGCTACGTCAATGTTGTACAACTTGTTGACAGCCAGTTTAATCTGAGGCTTGTTGGCACGTCGGTCCACAACAAATACCAAGGTGTTGTTATCCTCAATCTTCTTCATGGCAGACT…	>comp2250906_c0_seq2_Group 60S ribosomal proteins GATGCATCTATGGATGTATGCCTTTAAATCCTGTATGCATGCACTGTGGTAAGTTTACATATCATGACGGGCTAACTGACCCATTTACCACCTTCCCTCCCATCTTCCTCTTTTTTTTTTTTTTTTGGTTTTTCTTTTTTTATTTGTTTGCTTAAGGATATTATAACAGCCCCAATGTTTAGATGATTCCGATCTTGTTAGCAACATCCAAAGCATCCAAGTCAGGTGCCAATCGTACGTAGGCCTTCTTCTCGCCATCAGGTCTGATGAGAGTGTTGACCTTCGCTACGTCAATGTTGTACAACTTGTTGACAGCCAGTTTAATCTGAGGCTTGTTGGCACGTCGGTC…
comp2208429_c0_seq1	6.3e-53	557	sp|Q862I1|RL24_BOVIN	60S ribosomal protein L24 OS=Bos taurus GN=RPL24 PE=2 SV=2	6.3e-53	557	sp|Q66WF5|RL24_FELCA	60S ribosomal protein L24 OS=Felis catus GN=RPL24 PE=2 SV=1	6.3e-53	557	sp|P83731|RL24_HUMAN	60S ribosomal protein L24 OS=Homo sapiens GN=RPL24 PE=1 SV=1			+		+	Group 60S ribosomal proteins	CGGTTGCATGAGCAACACTCGTCAGTTCTCAACTGAGCCGGTTTCAACGAACCAGTTCCGTTCCCACAATCCTCCTTTACGACTTCCGTCAAAATGAAGATAGCACTGTGCTCCTTCAGTGGCTTCAAAATATACCCTGGCCACGGGAAAAGGGTAATCAAGACCGATGGACGGGCCTTCGACTTCATTAATGGAAAATGCGAAAAATCACATGCCATGAAGCGCAACCCTAGGAAGATCAACTGGACTGTGTTGTACCGTAGGAAACACAGGAAGGGTCTGCAAGAGGAAATCTCCAAGAAGCGAACCCGTCGCACAACCAAGTTCCAGAGGGCCATCACTGGAGCCACCTTGGCTGATATCATGGCTAAGAGGAACCAGAAGCCAGAGGTCAGGAAA…	>comp2208429_c0_seq1_Group 60S ribosomal proteins CGGTTGCATGAGCAACACTCGTCAGTTCTCAACTGAGCCGGTTTCAACGAACCAGTTCCGTTCCCACAATCCTCCTTTACGACTTCCGTCAAAATGAAGATAGCACTGTGCTCCTTCAGTGGCTTCAAAATATACCCTGGCCACGGGAAAAGGGTAATCAAGACCGATGGACGGGCCTTCGACTTCATTAATGGAAAATGCGAAAAATCACATGCCATGAAGCGCAACCCTAGGAAGATCAACTGGACTGTGTTGTACCGTAGGAAACACAGGAAGGGTCTGCAAGAGGAAATCTCCAAGAAGCGAACCCGTCGCACAACCAAGTTCCAGAGGGCCATCACTGGAGCCA…
comp2226635_c0_seq1	8.7e-40	433	sp|Q3T0L7|RL28_BOVIN	60S ribosomal protein L28 OS=Bos taurus GN=RPL28 PE=2 SV=3	8.7e-40	433	sp|P41105|RL28_MOUSE	60S ribosomal protein L28 OS=Mus musculus GN=Rpl28 PE=1 SV=2	1.8e-39	430	sp|P46779|RL28_HUMAN	60S ribosomal protein L28 OS=Homo sapiens GN=RPL28 PE=1 SV=3			+		+	Group 60S ribosomal proteins	CTCCCATTTTTTTTTTCCTTTTTTGACATTTATTAATTGTACAAGAATTTATTCCTTCTTAGCCTTGGCGCTTGCGCGTTTGCTGACCACAACTGGCTTCTGGCTCTGGAGGACGGCCGATGCTCGTCTGACGGCAGCCATTTTCAAATCCCTCCTGTAGCTCTGTCCCACGATGTTGCGTACTGACTTGAGGGTCTTTCTGGAGCCTCGTTTCAGTTCAACTCGGGAGTAGCCCTTGGCTGGCTTGCGGCCCATTCCACGCTTCTTGGTGATGAGCACGATGCCCTTGCCATCGCTGCATGGCTCAATGCCGACTGTCTTCTTGTGGATGAGGCCGTTGTAACGGAAGGAATTGCGGTTCTTCAGGTTGTTGGGTTCGCGGCTGAACGTCTGCTTGCT…	>comp2226635_c0_seq1_Group 60S ribosomal proteins CTCCCATTTTTTTTTTCCTTTTTTGACATTTATTAATTGTACAAGAATTTATTCCTTCTTAGCCTTGGCGCTTGCGCGTTTGCTGACCACAACTGGCTTCTGGCTCTGGAGGACGGCCGATGCTCGTCTGACGGCAGCCATTTTCAAATCCCTCCTGTAGCTCTGTCCCACGATGTTGCGTACTGACTTGAGGGTCTTTCTGGAGCCTCGTTTCAGTTCAACTCGGGAGTAGCCCTTGGCTGGCTTGCGGCCCATTCCACGCTTCTTGGTGATGAGCACGATGCCCTTGCCATCGCTGCATGGCTCAATGCCGACTGTCTTCTTGTGGATGAGGCCGTTGTAACGGAAG…
comp2258609_c0_seq1	7e-86	868	sp|O01802|RL7_CAEEL	60S ribosomal protein L7 OS=Caenorhabditis elegans GN=rpl-7 PE=3 SV=1	4.1e-81	823	sp|Q58DT1|RL7_BOVIN	60S ribosomal protein L7 OS=Bos taurus GN=RPL7 PE=2 SV=1	2.9e-80	815	sp|Q5R9R4|RL7_PONAB	60S ribosomal protein L7 OS=Pongo abelii GN=RPL7 PE=2 SV=1				+	+	Group 60S ribosomal proteins	TTTTTTTTTTTTTTTGTTTCTTTGAATTTATTTGGACAGCCAGGCAACAAGTCAATTAGATCATCTTTTTCAAGAGGGTGTTGACCTTGTCCTCTCGGTTGCCATAGTCACCACCATCGACAAAATGGTTGTTCTTCTTGCGCCAGCCTCCTGTGGGGGTGTTCAGCTTGAAGGGCCACAAGAAGTTTGCAGCTTCTTTGAAGTGGGGGCCGCAAGTGAAGATTTCGTGGACCAAATCCTCAACGCAAATAATGTTATATTTTCCTAGAGTCCTCTCGATGATAGAGTTCTGTGTCAGTGGAAGCCTTCTGCCAGCAACTTTGCCAAATCCACGTTTGTAGATCAGTTCCTTGACGGCCTTAAGGTTGGGGTATCCCCAGGTGATGTAGGGCTCGGCAA…	>comp2258609_c0_seq1_Group 60S ribosomal proteins TTTTTTTTTTTTTTTGTTTCTTTGAATTTATTTGGACAGCCAGGCAACAAGTCAATTAGATCATCTTTTTCAAGAGGGTGTTGACCTTGTCCTCTCGGTTGCCATAGTCACCACCATCGACAAAATGGTTGTTCTTCTTGCGCCAGCCTCCTGTGGGGGTGTTCAGCTTGAAGGGCCACAAGAAGTTTGCAGCTTCTTTGAAGTGGGGGCCGCAAGTGAAGATTTCGTGGACCAAATCCTCAACGCAAATAATGTTATATTTTCCTAGAGTCCTCTCGATGATAGAGTTCTGTGTCAGTGGAAGCCTTCTGCCAGCAACTTTGCCAAATCCACGTTTGTAGATCAGTTC…
comp2244716_c0_seq1	2.5e-65	674	sp|Q3SYR7|RL9_BOVIN	60S ribosomal protein L9 OS=Bos taurus GN=RPL9 PE=2 SV=1	2.5e-65	674	sp|P32969|RL9_HUMAN	60S ribosomal protein L9 OS=Homo sapiens GN=RPL9 PE=1 SV=1	2.5e-65	674	sp|P17077|RL9_RAT	60S ribosomal protein L9 OS=Rattus norvegicus GN=Rpl9 PE=1 SV=1			+		+	Group 60S ribosomal proteins	AGCTTTTTTTCCTTTTTTGATATTTATTTGTTTTAACAGACTGACACATTTCAATCCTCCACAATGTTTCCCTTGTCACTGACGTAGACACCATCCAAGAATTTTCGGATATCCTTATCTTTGACTGTGGTTGACTGCTGGATCAGGGCCGCGGACTGAGAGACGAGTTCGATGTCATTGCCTTCCAAGATCAACTCGTCCTTCATAGCCTGAGAAGCGACGCAGCTCACTCCTTCCAACATGCGCACTTGTCTTGTGTACTTCTCTCCCAAAAAGTTACGAACCTCCACCAAAGTGTTGTTCTCTGAGATGGCAATGTTGATGGGGAAATGAGCGTACACGGACCTCATCTTGTAACGGAATCCCTTAGTGACACCCTTGATCATGTTCTCGATGTGA…	>comp2244716_c0_seq1_Group 60S ribosomal proteins AGCTTTTTTTCCTTTTTTGATATTTATTTGTTTTAACAGACTGACACATTTCAATCCTCCACAATGTTTCCCTTGTCACTGACGTAGACACCATCCAAGAATTTTCGGATATCCTTATCTTTGACTGTGGTTGACTGCTGGATCAGGGCCGCGGACTGAGAGACGAGTTCGATGTCATTGCCTTCCAAGATCAACTCGTCCTTCATAGCCTGAGAAGCGACGCAGCTCACTCCTTCCAACATGCGCACTTGTCTTGTGTACTTCTCTCCCAAAAAGTTACGAACCTCCACCAAAGTGTTGTTCTCTGAGATGGCAATGTTGATGGGGAAATGAGCGTACACGGACCTCA…
comp2256245_c0_seq1	0.35	101	sp|Q06077|ABRB_ABRPR	Abrin-b OS=Abrus precatorius PE=1 SV=1	0.62	98	sp|Q9M6E9|AGGL_ABRPR	Agglutinin-1 OS=Abrus precatorius GN=AAG PE=1 SV=1	0.81	99	sp|Q8TFG9|PFL2_SCHPO	Putative GPI-anchored protein pfl2 OS=Schizosaccharomyces pombe (strain 972 / ATCC 24843) GN=pfl2 PE=2 SV=3		+			+		CATTTTTTTAGCAGCAAAAAGTTTTTATTTGGATGCCAAAAAATAACCAAAATATATAAGTCAAATGAATACATATGGTGATGAGTAAAAAAAATGAACCAATAAGAATGAGCACCTGTAATGCATTACAAACCTCCCCCGGAATCAACCACTGTAAATTGAAATCGTTACAGGACAACTTTCAACAGTAACAAAGATAGAAAAAAATTCAATAATTGCGATATCGATTGTTATAAAGATGAATTATGAATCTTGTGAGCTATTCAAAAGCATCTATAGATACGTCATAGCCAAATCTAATCCCTATCTTCAAAAGTTATCAAGAAAATTTCCTGTGTCTCTGAGTGCCTCGTTAGCTGTAATTTTTCGACTTATAAAGTCACTTATTCCAACATGGAG…	>comp2256245_c0_seq1 CATTTTTTTAGCAGCAAAAAGTTTTTATTTGGATGCCAAAAAATAACCAAAATATATAAGTCAAATGAATACATATGGTGATGAGTAAAAAAAATGAACCAATAAGAATGAGCACCTGTAATGCATTACAAACCTCCCCCGGAATCAACCACTGTAAATTGAAATCGTTACAGGACAACTTTCAACAGTAACAAAGATAGAAAAAAATTCAATAATTGCGATATCGATTGTTATAAAGATGAATTATGAATCTTGTGAGCTATTCAAAAGCATCTATAGATACGTCATAGCCAAATCTAATCCCTATCTTCAAAAGTTATCAAGAAAATTTCCTGTGTCTCTGAGTGCCTCGTTAGCTGTAATTTTTCGACTTATAAA…
comp2265386_c0_seq2	1.3e-23	304	sp|P48180|ACH1_CAEEL	Acetylcholine receptor subunit alpha-type acr-16 OS=Caenorhabditis elegans GN=acr-16 PE=2 SV=1	1.2e-22	296	sp|A8WQK3|ACH1_CAEBR	Acetylcholine receptor subunit alpha-type acr-16 OS=Caenorhabditis briggsae GN=acr-16 PE=3 SV=2	1.4e-22	294	sp|P30532|ACHA5_HUMAN	Neuronal acetylcholine receptor subunit alpha-5 OS=Homo sapiens GN=CHRNA5 PE=1 SV=2		+	+		++	Candidate_AcChR_subunit	TTTTTTTCTTTTTTCCCTTTTTTTTTTTTTTTAATGATTTCCTGCTGACAGATATTGTTTTAAAATTTATTTTAAAATGAAATTTAATGCTGTTTGTAAAATTGTCCTGAACCAATATAAAAATTACATGATGCACATTGTACAAGTGACATTTCATGTATAACATCAAATAACAAATACATACATCAATTGAGAATTTAAAAAAACTGATCGATGTGTTAAATATCATCTATGATTCATCTTCCAAGAGGAAGGAAAATGTTACAGTAGGATACGGTTCCTTGCAGCACGGGAAAAAATTGACTTGTTTGTGGCTGGTTGGTTTCGAAATGGGAAGCTCTGGATTTTGAGTGAGTTCGCTGACATCCAGGGGCTGCGCTACCAAATCAAGCATATTTC…	>comp2265386_c0_seq2_Candidate_AcChR_subunit TTTTTTTCTTTTTTCCCTTTTTTTTTTTTTTTAATGATTTCCTGCTGACAGATATTGTTTTAAAATTTATTTTAAAATGAAATTTAATGCTGTTTGTAAAATTGTCCTGAACCAATATAAAAATTACATGATGCACATTGTACAAGTGACATTTCATGTATAACATCAAATAACAAATACATACATCAATTGAGAATTTAAAAAAACTGATCGATGTGTTAAATATCATCTATGATTCATCTTCCAAGAGGAAGGAAAATGTTACAGTAGGATACGGTTCCTTGCAGCACGGGAAAAAATTGACTTGTTTGTGGCTGGTTGGTTTCGAAATGGGAAGCTCTGGATTTTGAGTGA…
comp2267172_c0_seq1	1.4e-73	752	sp|Q148J6|ARPC4_BOVIN	Actin-related protein 2/3 complex subunit 4 OS=Bos taurus GN=ARPC4 PE=1 SV=3	1.4e-73	752	sp|P59998|ARPC4_HUMAN	Actin-related protein 2/3 complex subunit 4 OS=Homo sapiens GN=ARPC4 PE=1 SV=3	1.4e-73	752	sp|P59999|ARPC4_MOUSE	Actin-related protein 2/3 complex subunit 4 OS=Mus musculus GN=Arpc4 PE=1 SV=3	+				+		ATGATGATTTATTTCACTGTTCATTGACGTTTTGTCAATAAATATATATATCCCAAATGTTTCCTTAACACTTTAAATATTATTTTCAAATATTTTAAGCATGCAGAGGGTCATAACCATATATACAATTAACAATCATTCGCACAGTTCTCTATGAGTAATTTTGGCAAATCCAGTCATTCCTATTGACTCACAGCAATATATTGCTCTAGATCTACAGGTTTGGTTTTAGAAAATAAACCGTTGTACAGCAGCATTTTAAGCGCTACTTGAAAATTAAATTAAATCATGCTCAAAATTGTAGATAACATTGATAGTACTATTCAACAGAAATGAGTCGTAACAAAATTCCTAATAAAACAAATGTGTAAAAAATTTCTCAGCTCTTTTATAAAGATT…	>comp2267172_c0_seq1 ATGATGATTTATTTCACTGTTCATTGACGTTTTGTCAATAAATATATATATCCCAAATGTTTCCTTAACACTTTAAATATTATTTTCAAATATTTTAAGCATGCAGAGGGTCATAACCATATATACAATTAACAATCATTCGCACAGTTCTCTATGAGTAATTTTGGCAAATCCAGTCATTCCTATTGACTCACAGCAATATATTGCTCTAGATCTACAGGTTTGGTTTTAGAAAATAAACCGTTGTACAGCAGCATTTTAAGCGCTACTTGAAAATTAAATTAAATCATGCTCAAAATTGTAGATAACATTGATAGTACTATTCAACAGAAATGAGTCGTAACAAAATTCCTAATAAAACAAATGTGTAAAAAATTT…
comp2247176_c0_seq3	0.9	92	sp|P53466|ACT2_LYTPI	Actin, cytoskeletal 2 OS=Lytechinus pictus PE=2 SV=1	0.98	90	sp|P53500|ACT_CYAM1	Actin OS=Cyanidioschyzon merolae (strain 10D) GN=CYME_CMM237C PE=3 SV=1	0.99	67	sp|P87297|DAD1_SCHPO	DASH complex subunit dad1 OS=Schizosaccharomyces pombe (strain 972 / ATCC 24843) GN=dad1 PE=1 SV=2			+	+	++		TGGGTGCTCTTCACAGATGGAAATTGTGCTGTTCACTTTAGGATAGGCGACAATAAAAGCAGGGTTGTTGCCGGGGCTGAATCCTAGGGGGGCAGACCCGGCAGAGTCTCATCCGGAGGCATGCGCACCCCTTGAAAACCGCAGAAAATTGAAATTTAAAAAAAAAGTCTGCCAAATTCAAGGAGGGGCAGCTGCCCCTACCGTACCCCAATGCAGGCTACAGCCCGCATTCACTGAGGCGAAGATCTGCGAAGTAACTTGCATCCCTTTGTTCCTTGCTGTACTCAATACAACTAAATTTTCCATCACCAATTAATAGATTTCCGCCAAACTCCCGTGGTGCCCATATAGAATATTGGTCGGTAAAATATTCACTGTGGACTATCTTTCCATTGATGT…	>comp2247176_c0_seq3 TGGGTGCTCTTCACAGATGGAAATTGTGCTGTTCACTTTAGGATAGGCGACAATAAAAGCAGGGTTGTTGCCGGGGCTGAATCCTAGGGGGGCAGACCCGGCAGAGTCTCATCCGGAGGCATGCGCACCCCTTGAAAACCGCAGAAAATTGAAATTTAAAAAAAAAGTCTGCCAAATTCAAGGAGGGGCAGCTGCCCCTACCGTACCCCAATGCAGGCTACAGCCCGCATTCACTGAGGCGAAGATCTGCGAAGTAACTTGCATCCCTTTGTTCCTTGCTGTACTCAATACAACTAAATTTTCCATCACCAATTAATAGATTTCCGCCAAACTCCCGTGGTGCCCATATAGAATATTGGTCGGTAAAATATTCACTGT…
comp2271381_c1_seq12	2e-65	675	sp|P05081|KAD1_CHICK	Adenylate kinase isoenzyme 1 OS=Gallus gallus GN=AK1 PE=1 SV=1	4.7e-64	662	sp|Q9R0Y5|KAD1_MOUSE	Adenylate kinase isoenzyme 1 OS=Mus musculus GN=Ak1 PE=1 SV=1	6e-64	661	sp|P00569|KAD1_RABIT	Adenylate kinase isoenzyme 1 OS=Oryctolagus cuniculus GN=AK1 PE=1 SV=1			+		+		CATGTGTTGTTTTGTTACAAAATTGCTTGTGCTTGTTTGAAATATTTTGTTTTGGGCTGTTCTTAGCTAGTTTTGTTTTTATTTATTTCTAATCAATTAACCCCCAACTAACACCAGGGTTTATAAATCAAGATTTCATTGAGTTTTGATATTTTTCTAGTTAATCAGAATTTGTATTGCATGGAATGAAACCTAGGCTACTCCACATTATTTTCTATGCATGAATTAGATAAAGCATGTATACTTTCAACTTAATCATGTTTTATGATGGAAGAATAAGAAGTTATAATGCACAATGAAAGAAATGATCTCAAATCTGATTCTTTTCTTCTTCAAACTTCTGATCTTTGAGTATCTAGGTAGGCTAAATAGCCGAGGGTTATGCTATAATAATGCACA…	>comp2271381_c1_seq12 CATGTGTTGTTTTGTTACAAAATTGCTTGTGCTTGTTTGAAATATTTTGTTTTGGGCTGTTCTTAGCTAGTTTTGTTTTTATTTATTTCTAATCAATTAACCCCCAACTAACACCAGGGTTTATAAATCAAGATTTCATTGAGTTTTGATATTTTTCTAGTTAATCAGAATTTGTATTGCATGGAATGAAACCTAGGCTACTCCACATTATTTTCTATGCATGAATTAGATAAAGCATGTATACTTTCAACTTAATCATGTTTTATGATGGAAGAATAAGAAGTTATAATGCACAATGAAAGAAATGATCTCAAATCTGATTCTTTTCTTCTTCAAACTTCTGATCTTTGAGTATCTAGGTAGGCTAAATAGCCGAG…
comp2273576_c0_seq1	4.3e-157	1540	sp|B5X2Z0|PUA1A_SALSA	Adenylosuccinate synthetase isozyme 1 A OS=Salmo salar GN=adssl1a PE=2 SV=1	4.9e-156	1530	sp|B5DGM3|PUA1B_SALSA	Adenylosuccinate synthetase isozyme 1 B OS=Salmo salar GN=adssl1b PE=2 SV=1	1.2e-154	1517	sp|Q561L1|PUA1A_XENLA	Adenylosuccinate synthetase isozyme 1 A OS=Xenopus laevis GN=adssl1-a PE=2 SV=1	+		+		++		TCCCCCTTCAAGAGAAACATGGCGGCCAGTGAAGGCACGGTGAACGGAGGGTCTCCGTTGAAAAGGCCCAGGACGGACGATATCAACAAAGTGTCGGTCGTTCTGGGGGCCCAATGGGGAGACGAAGGCAAGGGCAAGATCGTGGACTTGTTAGCGACAGAAGCCAACATCGTGTGTCGGTGTCAGGGGGGAAACAACGCTGGACACACAGTAGTGGTGAATGGCGTCCACTATGACTTCCATCTTCTGCCCAGCGGGATCATTAATGACAATTGCATGTCAGTCATTGGCAATGGAGTAGTTGTTCACTTGCCTGGGCTTTTTGCTGAGATAGAAAAATGTGAAGCCAAGGGGATGACCGGCTGGGAAAAGAGACTCCTCATTTCGTCCAGGGCTCAT…	>comp2273576_c0_seq1 TCCCCCTTCAAGAGAAACATGGCGGCCAGTGAAGGCACGGTGAACGGAGGGTCTCCGTTGAAAAGGCCCAGGACGGACGATATCAACAAAGTGTCGGTCGTTCTGGGGGCCCAATGGGGAGACGAAGGCAAGGGCAAGATCGTGGACTTGTTAGCGACAGAAGCCAACATCGTGTGTCGGTGTCAGGGGGGAAACAACGCTGGACACACAGTAGTGGTGAATGGCGTCCACTATGACTTCCATCTTCTGCCCAGCGGGATCATTAATGACAATTGCATGTCAGTCATTGGCAATGGAGTAGTTGTTCACTTGCCTGGGCTTTTTGCTGAGATAGAAAAATGTGAAGCCAAGGGGATGACCGGCTGGGAAAAGAGACTC…
comp2138816_c0_seq1	0.00019	132	sp|Q6QNK2|AGRD1_HUMAN	Adhesion G-protein coupled receptor D1 OS=Homo sapiens GN=ADGRD1 PE=1 SV=1	0.0092	117	sp|Q80T32|AGRD1_MOUSE	Adhesion G-protein coupled receptor D1 OS=Mus musculus GN=Adgrd1 PE=2 SV=2	0.64	94	sp|P48759|PTX3_MOUSE	Pentraxin-related protein PTX3 OS=Mus musculus GN=Ptx3 PE=1 SV=2		+			+		GATTCATCATACTAGCACATCCCTCATGCAGTTCCAAAATTAAGTTCACTCATATTTGAAAATGGCAGGATTGTGCATCTTCTTCTTTGCATCAGCTTTCGTAATAAGCTGTGCTAAGGCAAATGAAGAAGTCTTCCAAGATGTAGCCAGATTGTGTGACCAGTTTTGTGTTGTTCGATCAGATACAAGATGTCAGAAAAAGGCGATGCCAAAACCAGATATTTACGTTTCCATGGACAAAATCGATGGATCAGAAGTTGCCGCTACAGGATTATCAGAAGAAGTTACTGTCAGAGGATCACCAAAACCATCGTTGGTGCCTGGAAAAGTGAATTATGCAATCCAACTCCAGAATACCCAGACCCTGGATGACAAGTTCATTGATCTTGGATATTTGAG…	>comp2138816_c0_seq1 GATTCATCATACTAGCACATCCCTCATGCAGTTCCAAAATTAAGTTCACTCATATTTGAAAATGGCAGGATTGTGCATCTTCTTCTTTGCATCAGCTTTCGTAATAAGCTGTGCTAAGGCAAATGAAGAAGTCTTCCAAGATGTAGCCAGATTGTGTGACCAGTTTTGTGTTGTTCGATCAGATACAAGATGTCAGAAAAAGGCGATGCCAAAACCAGATATTTACGTTTCCATGGACAAAATCGATGGATCAGAAGTTGCCGCTACAGGATTATCAGAAGAAGTTACTGTCAGAGGATCACCAAAACCATCGTTGGTGCCTGGAAAAGTGAATTATGCAATCCAACTCCAGAATACCCAGACCCTGGATGACAAGTT…
comp2187328_c0_seq1	5.7e-07	156	sp|Q6QNK2|AGRD1_HUMAN	Adhesion G-protein coupled receptor D1 OS=Homo sapiens GN=ADGRD1 PE=1 SV=1	1.3e-06	153	sp|Q80T32|AGRD1_MOUSE	Adhesion G-protein coupled receptor D1 OS=Mus musculus GN=Adgrd1 PE=2 SV=2	0.0016	125	sp|A6QLU6|AGRD1_BOVIN	Adhesion G-protein coupled receptor D1 OS=Bos taurus GN=ADGRD1 PE=2 SV=1		+			+		CGTGGACATGATATAATGCATATATGTTGTGGTTAGTCTGACACAAATAACTCGCCACAGATACAAATTATCAGGTTTTCACATTGAAGTTTCAGCATCATGATGAAGCAGTCCACATTTGTTTCATTATTGATCTTTGCAATATTGGCTTTGCTAAGGCAAGCCCAGGGGAATGAAGTCTTGAGTGATGTCGAAAAGCTTTGTTCGAGGTTTTGCGAAGCCAAATCAACCGATGGATGTCCCGCTGCAATACCAAAACCTGATGTCTATGCCCCAATGGACCAAATTGAAGATCAGGAGACCCCAGCAACTGGTGCTGTTGTGCACGTCAGGGGATGGCCAAAACCATCAGTACAACCTGGTATCTTTGGCGGATCCATCTTCCTGGAAAATAGAGGT…	>comp2187328_c0_seq1 CGTGGACATGATATAATGCATATATGTTGTGGTTAGTCTGACACAAATAACTCGCCACAGATACAAATTATCAGGTTTTCACATTGAAGTTTCAGCATCATGATGAAGCAGTCCACATTTGTTTCATTATTGATCTTTGCAATATTGGCTTTGCTAAGGCAAGCCCAGGGGAATGAAGTCTTGAGTGATGTCGAAAAGCTTTGTTCGAGGTTTTGCGAAGCCAAATCAACCGATGGATGTCCCGCTGCAATACCAAAACCTGATGTCTATGCCCCAATGGACCAAATTGAAGATCAGGAGACCCCAGCAACTGGTGCTGTTGTGCACGTCAGGGGATGGCCAAAACCATCAGTACAACCTGGTATCTTTGGCGGATCC…
comp2245687_c1_seq1	0.52	98	sp|Q6QNK2|AGRD1_HUMAN	Adhesion G-protein coupled receptor D1 OS=Homo sapiens GN=ADGRD1 PE=1 SV=1										+			+		CGGTTTTTTTTTTTTTTAAAATTTAAGGTTGAATTTATTGGTCACACTTTATCAAATATGTATAACCCACACATGTGATATCTGTTGCCAAGAAGGTCCCAAATCTGATTTGCGGATTGGTTTACGCTGGACATTCCCCATTGTAGTAGACTTCTGCGATTTCGGCATCTGATTTAGCAAAGTCCCAAATTTGCAGTTGGTCAAAATTAGCCCTAGCACAATTACCGTCAATGTGGCAACCGATCTGAATATTCTTGCTCCTTCTCGTCATAACCCGGTCATAGTTGATTTGATTGTCGTTCAGTTTACCGTCAATATAAAATCTGATATTGTCATAATTGCGGAACACAAAGGCCACCTGGTGCCATTCGTCCTGCTGGACCAGGTCCGTCCCGTCTT…	>comp2245687_c1_seq1 CGGTTTTTTTTTTTTTTAAAATTTAAGGTTGAATTTATTGGTCACACTTTATCAAATATGTATAACCCACACATGTGATATCTGTTGCCAAGAAGGTCCCAAATCTGATTTGCGGATTGGTTTACGCTGGACATTCCCCATTGTAGTAGACTTCTGCGATTTCGGCATCTGATTTAGCAAAGTCCCAAATTTGCAGTTGGTCAAAATTAGCCCTAGCACAATTACCGTCAATGTGGCAACCGATCTGAATATTCTTGCTCCTTCTCGTCATAACCCGGTCATAGTTGATTTGATTGTCGTTCAGTTTACCGTCAATATAAAATCTGATATTGTCATAATTGCGGAACACAAAGGCCACCTGGTGCCATTCGTCCTGCT…
comp2268857_c0_seq2	0.079	109	sp|Q6QNK2|AGRD1_HUMAN	Adhesion G-protein coupled receptor D1 OS=Homo sapiens GN=ADGRD1 PE=1 SV=1	0.39	102	sp|Q80T32|AGRD1_MOUSE	Adhesion G-protein coupled receptor D1 OS=Mus musculus GN=Adgrd1 PE=2 SV=2	0.9998	64	sp|P66124|RL27_CHLMU	50S ribosomal protein L27 OS=Chlamydia muridarum (strain MoPn / Nigg) GN=rpmA PE=3 SV=1		+			+		AAAATTTTTTTTTTTTTTTTTTTGACAATGAAAAAAACTTTATTAAGGAAACCCATCGATGATCATTTGGTCGCTGATGGAGGGCCGCCGTGTACAAAGAAAAGATTCATTGACATGTAATTAGATATCTTCTGTTGTTTAGTGTTGTGTTGTTGCTACTAATGACCACAAATATAGCAATTTGTTATTGTGCAGTTTTCTTGATAATTAACGTCTCTTCTTCATGTTGTAAATCTGCTTCACTTCAGCATCAGACTTTGCTTTCTCCCAGATCTTGATTTCATCAAATGCAGCAGAGATGCAATTCCTTCTCATGTAGCAACCAAACTCAATGGTCTTGTAAGTGATTGTCTCTCGGCGTTGTGGTCTCATCTCTGGTAACTCTTCACCATCAAGATA…	>comp2268857_c0_seq2 AAAATTTTTTTTTTTTTTTTTTTGACAATGAAAAAAACTTTATTAAGGAAACCCATCGATGATCATTTGGTCGCTGATGGAGGGCCGCCGTGTACAAAGAAAAGATTCATTGACATGTAATTAGATATCTTCTGTTGTTTAGTGTTGTGTTGTTGCTACTAATGACCACAAATATAGCAATTTGTTATTGTGCAGTTTTCTTGATAATTAACGTCTCTTCTTCATGTTGTAAATCTGCTTCACTTCAGCATCAGACTTTGCTTTCTCCCAGATCTTGATTTCATCAAATGCAGCAGAGATGCAATTCCTTCTCATGTAGCAACCAAACTCAATGGTCTTGTAAGTGATTGTCTCTCGGCGTTGTGGTCTCATCTCTGG…
comp2262317_c0_seq2	3.5e-75	767	sp|B5FYQ0|ARL3_TAEGU	ADP-ribosylation factor-like protein 3 OS=Taeniopygia guttata GN=ARL3 PE=2 SV=1	3.5e-75	767	sp|Q8QHI3|ARL3_XENLA	ADP-ribosylation factor-like protein 3 OS=Xenopus laevis GN=arl3 PE=2 SV=1	5.7e-75	765	sp|Q52NJ4|ARL3_PIG	ADP-ribosylation factor-like protein 3 OS=Sus scrofa GN=ARL3 PE=2 SV=1				+	+		CGAGAAGCTAAAGATCAATTGTGTCCAGCCTATGCATTGAATTAGTTATAATCTATAATAAATTCATAACAAAATAAGCATTATTTAGCTATAAAAGCATTGAAGATCTGTGGAAAGATTCGGTGGAAAGCAGGGCAGTATCATGACGAGATTGATCACTGGATTGTTCAAGAAAATGTCATTTGAGATCAAGTTATCACTTCTTTGATCCTCGTAAGTTTTTAGTCATCCATTCAAGGCCATCCTGTACACCTTCTTTCTTGATAGCTGAACACGGCTGGATCTGCCATTTTCGGTCTCGGATTTCATGCAGTAGTAATCCTTCAGCAATTTCAGACGGAGGTGCAGCCGCCATCAAATCTTGCTTGTTGGCAAAAATTAAAACTGGCACGCCACTCA…	>comp2262317_c0_seq2 CGAGAAGCTAAAGATCAATTGTGTCCAGCCTATGCATTGAATTAGTTATAATCTATAATAAATTCATAACAAAATAAGCATTATTTAGCTATAAAAGCATTGAAGATCTGTGGAAAGATTCGGTGGAAAGCAGGGCAGTATCATGACGAGATTGATCACTGGATTGTTCAAGAAAATGTCATTTGAGATCAAGTTATCACTTCTTTGATCCTCGTAAGTTTTTAGTCATCCATTCAAGGCCATCCTGTACACCTTCTTTCTTGATAGCTGAACACGGCTGGATCTGCCATTTTCGGTCTCGGATTTCATGCAGTAGTAATCCTTCAGCAATTTCAGACGGAGGTGCAGCCGCCATCAAATCTTGCTTGTTGGCAAAAA…
comp1953876_c0_seq1	9.9e-103	1027	sp|O49447|ADT3_ARATH	ADP,ATP carrier protein 3, mitochondrial OS=Arabidopsis thaliana GN=AAC3 PE=1 SV=1	8e-101	1009	sp|P40941|ADT2_ARATH	ADP,ATP carrier protein 2, mitochondrial OS=Arabidopsis thaliana GN=AAC2 PE=1 SV=2	2.1e-100	1005	sp|P31691|ADT_ORYSJ	ADP,ATP carrier protein, mitochondrial OS=Oryza sativa subsp. japonica GN=Os02g0718900 PE=2 SV=1		+			+		AGTTATTTTACAGTTTTTATGGTATTTTTATTCGTTTCAGTTTCAATTGTACACATTCACTCCTTCAGTTGTTGACAGGGCGCATAAAAAATTATGAACAGAAATGCATGCCTTTAGAATGCTAAAAGTGCCTAAGAGGTGCCAGGTTTCCTACCAATTAAATCAAGACCTTGTCATATTCATAACTGTACAACCATTAGGTCCTAGCTTAACAGGAGGATCAAATAACTGTTTGGCAAATACACATAAGTTAATTCCTATGAAGAAATGTCTAAAATGATGTTAGGTTGGTGGTTAGCAATTAAGATAACCTGAAGTTCATGTAGACTTCCTTGAACTTATCAAATCCAGCCAATACACCAGCACCAGCCACACCTCTGAGAATGTTGGCACCAGCTC…	>comp1953876_c0_seq1 AGTTATTTTACAGTTTTTATGGTATTTTTATTCGTTTCAGTTTCAATTGTACACATTCACTCCTTCAGTTGTTGACAGGGCGCATAAAAAATTATGAACAGAAATGCATGCCTTTAGAATGCTAAAAGTGCCTAAGAGGTGCCAGGTTTCCTACCAATTAAATCAAGACCTTGTCATATTCATAACTGTACAACCATTAGGTCCTAGCTTAACAGGAGGATCAAATAACTGTTTGGCAAATACACATAAGTTAATTCCTATGAAGAAATGTCTAAAATGATGTTAGGTTGGTGGTTAGCAATTAAGATAACCTGAAGTTCATGTAGACTTCCTTGAACTTATCAAATCCAGCCAATACACCAGCACCAGCCACACCTC…
comp2275191_c0_seq1	1.6e-77	789	sp|Q6NYL5|ALAT2_DANRE	Alanine aminotransferase 2-like OS=Danio rerio GN=gpt2l PE=2 SV=2	4.3e-77	785	sp|Q6GM82|ALAT2_XENLA	Alanine aminotransferase 2 OS=Xenopus laevis GN=gpt2 PE=2 SV=1	7.1e-77	783	sp|Q28DB5|ALAT2_XENTR	Alanine aminotransferase 2 OS=Xenopus tropicalis GN=gpt2 PE=2 SV=1				+	+		TCCAGGGTTAATCACACATAGAGCCCTAGGTACACAGTGAGCTCTCGCCTCCTGGATTGCTCTCTCCAACTCTTCTAAATCAAGAGACCAGCGATTGTCCTCGTTCAAATAGTAGGGAATCATATGAGCATTGTATTCGGCAATTGTGGCAGTGTAAAGGGGGTATTGGGGAATGGGGATTAGTACACCTGCCTTATTGGCATCTCGTCCGGTCATCAACATCTTCAAGATGGACTTAATTCCATCACTAGCTCCTGTGCTGAGGAAGACGTTCGTATAATCACAAGGGTGGCCATCTCTCTCTTCGATGTACTTGGCTATGTCGCGTCGTATGACCTCAACACCGGCACTGTCACTGTACGCACCGATGCTGTGTCCCTTGCATCCTGCCAGCACCCT…	>comp2275191_c0_seq1 TCCAGGGTTAATCACACATAGAGCCCTAGGTACACAGTGAGCTCTCGCCTCCTGGATTGCTCTCTCCAACTCTTCTAAATCAAGAGACCAGCGATTGTCCTCGTTCAAATAGTAGGGAATCATATGAGCATTGTATTCGGCAATTGTGGCAGTGTAAAGGGGGTATTGGGGAATGGGGATTAGTACACCTGCCTTATTGGCATCTCGTCCGGTCATCAACATCTTCAAGATGGACTTAATTCCATCACTAGCTCCTGTGCTGAGGAAGACGTTCGTATAATCACAAGGGTGGCCATCTCTCTCTTCGATGTACTTGGCTATGTCGCGTCGTATGACCTCAACACCGGCACTGTCACTGTACGCACCGATGCTGTGTCC…
comp2272495_c0_seq1	6e-199	1935	sp|P11884|ALDH2_RAT	Aldehyde dehydrogenase, mitochondrial OS=Rattus norvegicus GN=Aldh2 PE=1 SV=1	2e-198	1930	sp|P47738|ALDH2_MOUSE	Aldehyde dehydrogenase, mitochondrial OS=Mus musculus GN=Aldh2 PE=1 SV=1	2.6e-198	1929	sp|P20000|ALDH2_BOVIN	Aldehyde dehydrogenase, mitochondrial OS=Bos taurus GN=ALDH2 PE=1 SV=2		+			+		GGGGCGAGCAGGTGTAATGAAAGAGATTATCAGTCTTTGCTTTGTGCAGTTGAGTTGAGCAGCTCACTCTGTGCAGAAGAAGCAAACATGGCAACTGTATTACGTCTGTTAAAACCGAGAAACTTCTCAGGAATACTTAGAACTCAGCAGGCTTTGCTGTCAACTGTGCCTGAACCTTCCAGAAACCCTGATATTCACTACAACAAGATCTTTATCAACAATGAGTGGCAAGACGCTGTGAGTGGAAAGACCTTTCCTACGATAAATCCTGCGACTGGAAATGTTATAACCCAAGTGGCCGAAGGAGATAAGGCTGATGTGGACAAAGCAGTAAAAGCTGCAAATAATGCTTTTGCATTTGGTTCAGAATGGCGCAGAATGGACGCTGCCACCAGAGGG…	>comp2272495_c0_seq1 GGGGCGAGCAGGTGTAATGAAAGAGATTATCAGTCTTTGCTTTGTGCAGTTGAGTTGAGCAGCTCACTCTGTGCAGAAGAAGCAAACATGGCAACTGTATTACGTCTGTTAAAACCGAGAAACTTCTCAGGAATACTTAGAACTCAGCAGGCTTTGCTGTCAACTGTGCCTGAACCTTCCAGAAACCCTGATATTCACTACAACAAGATCTTTATCAACAATGAGTGGCAAGACGCTGTGAGTGGAAAGACCTTTCCTACGATAAATCCTGCGACTGGAAATGTTATAACCCAAGTGGCCGAAGGAGATAAGGCTGATGTGGACAAAGCAGTAAAAGCTGCAAATAATGCTTTTGCATTTGGTTCAGAATGGCGCAGA…
comp2265656_c0_seq3	5.1e-106	842	sp|P24823|PPBN_MOUSE	Alkaline phosphatase, placental-like OS=Mus musculus GN=Alppl2 PE=2 SV=2	2.8e-103	834	sp|P05187|PPB1_HUMAN	Alkaline phosphatase, placental type OS=Homo sapiens GN=ALPP PE=1 SV=2	1.2e-102	811	sp|P09923|PPBI_HUMAN	Intestinal-type alkaline phosphatase OS=Homo sapiens GN=ALPI PE=1 SV=2		+			+		TTGGTAGATGACGATGACAACTCCAAGATCAGAGTTCTTCTCGGAGGAGGAAGAAGAAGTCTGTATCCAGAAGGTGTCCGAGATCCGGAATTTCCAGAACAATACGGAAGGAGAGAAGACGGAAGAAATTTGGTGGATGAATGGATTACTAAGAAGATCAACATGGGCGCCAGAAGAGATGAAGTCAAATATGTCTACAACAAAACAGCTTTCGACAGGATTGATCCCGATGATACTGAATACTTAATGGGATTGTTCCAACCTGGACATATGAATTACGAATTGGACAAGAATAACCCATCCCTTGAGAAATCGGGCGAACCAAGCTTGTCTGAAATGGTGGAGAAGGCGATTAAGATACTGAAGAGGAATGATGATGGATTCTATCTCTTCGTAGAA…	>comp2265656_c0_seq3 TTGGTAGATGACGATGACAACTCCAAGATCAGAGTTCTTCTCGGAGGAGGAAGAAGAAGTCTGTATCCAGAAGGTGTCCGAGATCCGGAATTTCCAGAACAATACGGAAGGAGAGAAGACGGAAGAAATTTGGTGGATGAATGGATTACTAAGAAGATCAACATGGGCGCCAGAAGAGATGAAGTCAAATATGTCTACAACAAAACAGCTTTCGACAGGATTGATCCCGATGATACTGAATACTTAATGGGATTGTTCCAACCTGGACATATGAATTACGAATTGGACAAGAATAACCCATCCCTTGAGAAATCGGGCGAACCAAGCTTGTCTGAAATGGTGGAGAAGGCGATTAAGATACTGAAGAGGAATGATGAT…
comp2257131_c0_seq2	7.8e-39	424	sp|P55008|AIF1_HUMAN	Allograft inflammatory factor 1 OS=Homo sapiens GN=AIF1 PE=1 SV=1	1.3e-38	422	sp|Q5TM25|AIF1_MACMU	Allograft inflammatory factor 1 OS=Macaca mulatta GN=AIF1 PE=3 SV=1	2.6e-38	419	sp|P55009|AIF1_RAT	Allograft inflammatory factor 1 OS=Rattus norvegicus GN=Aif1 PE=2 SV=1		+	+		++	Candidate Allograft inflammatory factor	TAGATCTGTATGAGTTGGAGTTTATTAAATGGGATAAATATGATTATAAAAGTAATCAAAAGTACAATTCTTTCATCAACAGTCACACTGGCATGCTAACATTGTGAGTCACACACATACAGTGTACATAGGTAACAGCGCAAGCTAAAATATGTGACAGTTTAAAATACACTTAACAATACATGTACAAGGTTCTCAATACTGGCTTTGTAAAGTCTTTTAACGAGTTCACTGGCTGGGCTTGTGAGAAAACTGATAAATGGAATAATTTCTCAGTTCTGCCAGCAGAACACACCAAGGAATCCATTGTTTGTCTACAATAGTTTACTTCCATTGAAGTATGCAGTTAAAAACAAGTCTCTGTAATAAAGGTAGCAGTTTCACATAGTCATAGGATGA…	>comp2257131_c0_seq2_Candidate Allograft inflammatory factor TAGATCTGTATGAGTTGGAGTTTATTAAATGGGATAAATATGATTATAAAAGTAATCAAAAGTACAATTCTTTCATCAACAGTCACACTGGCATGCTAACATTGTGAGTCACACACATACAGTGTACATAGGTAACAGCGCAAGCTAAAATATGTGACAGTTTAAAATACACTTAACAATACATGTACAAGGTTCTCAATACTGGCTTTGTAAAGTCTTTTAACGAGTTCACTGGCTGGGCTTGTGAGAAAACTGATAAATGGAATAATTTCTCAGTTCTGCCAGCAGAACACACCAAGGAATCCATTGTTTGTCTACAATAGTTTACTTCCATTGAA…
comp2271350_c0_seq18	3.4e-111	827	sp|P06280|AGAL_HUMAN	Alpha-galactosidase A OS=Homo sapiens GN=GLA PE=1 SV=1	3.9e-110	793	sp|Q90744|NAGAB_CHICK	Alpha-N-acetylgalactosaminidase OS=Gallus gallus GN=NAGA PE=1 SV=1	2.2e-107	790	sp|P51569|AGAL_MOUSE	Alpha-galactosidase A OS=Mus musculus GN=Gla PE=1 SV=1		+			+		CATCCTCACCCAAATAAACTTCACAACAAGCGGCAGAATGTTGACGCTGCTGGTATTGGCCTTAATTGGAGGCAGTTTTGCCTTGGACAATGGCCTGGCAAGAACACCTCCCATGGGCTGGCTCACCTGGGAAAGATTTAGGTGCAATATTGACTGTGACCACGATCCAGATAATTGCATTGGAGAGAAACTTATGAAATCTATGGCAGACAGAATGGCTGCTGACGGCTACCTGGCTGCTGGCTATGAGTACATCATAATTGACGATTGCTGGCTGGCTCCAGAGAGGACACCAGAGGGACAGCTTCAACCGGATCCTAAACGCTTCCCAAGCGGAATTAAGGCTTTAGCTGATTATGTTCACAGCAAAGGTCTGAAATTTGGAATTTATGAAGATTT…	>comp2271350_c0_seq18 CATCCTCACCCAAATAAACTTCACAACAAGCGGCAGAATGTTGACGCTGCTGGTATTGGCCTTAATTGGAGGCAGTTTTGCCTTGGACAATGGCCTGGCAAGAACACCTCCCATGGGCTGGCTCACCTGGGAAAGATTTAGGTGCAATATTGACTGTGACCACGATCCAGATAATTGCATTGGAGAGAAACTTATGAAATCTATGGCAGACAGAATGGCTGCTGACGGCTACCTGGCTGCTGGCTATGAGTACATCATAATTGACGATTGCTGGCTGGCTCCAGAGAGGACACCAGAGGGACAGCTTCAACCGGATCCTAAACGCTTCCCAAGCGGAATTAAGGCTTTAGCTGATTATGTTCACAGCAAAGGTCTGA…
comp2270085_c0_seq9	2.7e-290	2751	sp|Q10567|AP1B1_HUMAN	AP-1 complex subunit beta-1 OS=Homo sapiens GN=AP1B1 PE=1 SV=2	2.4e-289	2742	sp|O35643|AP1B1_MOUSE	AP-1 complex subunit beta-1 OS=Mus musculus GN=Ap1b1 PE=1 SV=2	1.3e-286	2716	sp|P52303|AP1B1_RAT	AP-1 complex subunit beta-1 OS=Rattus norvegicus GN=Ap1b1 PE=1 SV=1		+			+		GTTTATTCTTGGTTGAGTAATGTGTTTATGTAACAACTACCAACATTCATAATATTATACAGTTTTTACAGTGTAATAATTTACAGCACAATCTTAATATACAGAAACGTACAATCAAAACAAAACCATGATATTTTATCAAGCAAGTACGACACAACAAACATCTCACAATCATAGCCCTTATAACTAAGCCAATGATTTAATCATAGCCCTTATAACTAAGCCAATGATTTAAAACCCCAACTTTCGTGAACATAATTAAGTTTCTTTATAGTTTGAGATTCTTGGTACTTATTATATCTCTTGTAATTAGCGGCAGTCGTGAAATTTATAATAGCACCTACAGAAAATAATACCAAGCAACATAATATTATGTCAAACAAAGTTTTCTACAAGTCA…	>comp2270085_c0_seq9 GTTTATTCTTGGTTGAGTAATGTGTTTATGTAACAACTACCAACATTCATAATATTATACAGTTTTTACAGTGTAATAATTTACAGCACAATCTTAATATACAGAAACGTACAATCAAAACAAAACCATGATATTTTATCAAGCAAGTACGACACAACAAACATCTCACAATCATAGCCCTTATAACTAAGCCAATGATTTAATCATAGCCCTTATAACTAAGCCAATGATTTAAAACCCCAACTTTCGTGAACATAATTAAGTTTCTTTATAGTTTGAGATTCTTGGTACTTATTATATCTCTTGTAATTAGCGGCAGTCGTGAAATTTATAATAGCACCTACAGAAAATAATACCAAGCAACATAATATTATGTCA…
comp2263011_c0_seq1	5.1e-45	520	sp|Q9U943|APLP_LOCMI	Apolipophorins OS=Locusta migratoria PE=1 SV=2	4.9e-21	258	sp|Q9V496|APLP_DROME	Apolipophorins OS=Drosophila melanogaster GN=Rfabg PE=1 SV=2	2e-15	267	sp|Q6ZWJ8|KCP_HUMAN	Kielin/chordin-like protein OS=Homo sapiens GN=KCP PE=2 SV=2			+		+		GAATGCTTTGGCTAAAGTAACAACTCCCTATGAAATGATCAAGATTTTTGAAATCACTCTGAATCATCGTGGAGAAATTACGTCCTGCAGCAATGACTACCTAATCAATTACAATGGAAAGAAGATAACTGGCAACAACAAGCTTGATATTGACAGCAGAGGCATCCGTGGTGAATCTAACATGAACACACCATTTGAGGGCTACAGAACTATGTCCTATAGCTTCAACCATGCTGGTGATCTCCAGGTCTTCAATGGTAAATATGAAATCAACTGGGAAAGTAAAAAGATTGAGCTGACAATGGACTACAACTACAACTACCGTGGTGTGACAGGAAGTTTTGATCTTTCTACCCCCTTTGAACAGCTCAAAACAGCCAGTTTGTCCTTTGAGCACAG…	>comp2263011_c0_seq1 GAATGCTTTGGCTAAAGTAACAACTCCCTATGAAATGATCAAGATTTTTGAAATCACTCTGAATCATCGTGGAGAAATTACGTCCTGCAGCAATGACTACCTAATCAATTACAATGGAAAGAAGATAACTGGCAACAACAAGCTTGATATTGACAGCAGAGGCATCCGTGGTGAATCTAACATGAACACACCATTTGAGGGCTACAGAACTATGTCCTATAGCTTCAACCATGCTGGTGATCTCCAGGTCTTCAATGGTAAATATGAAATCAACTGGGAAAGTAAAAAGATTGAGCTGACAATGGACTACAACTACAACTACCGTGGTGTGACAGGAAGTTTTGATCTTTCTACCCCCTTTGAACAGCTCAAAACAGC…
comp2143411_c0_seq1	1.1e-30	347	sp|Q24251|ATP5H_DROME	ATP synthase subunit d, mitochondrial OS=Drosophila melanogaster GN=ATPsynD PE=2 SV=2	1.3e-20	252	sp|P13620|ATP5H_BOVIN	ATP synthase subunit d, mitochondrial OS=Bos taurus GN=ATP5H PE=1 SV=2	1.7e-20	251	sp|O75947|ATP5H_HUMAN	ATP synthase subunit d, mitochondrial OS=Homo sapiens GN=ATP5H PE=1 SV=3			+		+		TTTTTTTTTTTTTTTTTTTGATGTATAAGGATTTTTATTCACAAGACCGCTTTATAACCTCTCGTAATTTGCTATGTAAACTTTTGCCCTCACATTCTAATTTTGACAGTTAAATTACTTGACTTCATGGGGATCGTTGCCCGGCTGGTGGAAGGGGGTGTGGGGCCAGAGGGTTGGCCTCTCAACTGGGTTGGGAGCGTTCTCTGGGAAGTAATCTTGGTACATCTGGAGGGTCATAGATTCTGGCTTGGGCACAGAGTTGATTTTGTCCAGAAAAGCCTGAGCGTCAATCATCTGTTGTTTGATCTCAGCAACCATTTTCTTAGTTTCTTCGGCAGCAGCAGCCTCCTCCTTGTCAACTTCCGCTTTCAGATTTTCTTTGTCTGCAGGGTAAGGGAT…	>comp2143411_c0_seq1 TTTTTTTTTTTTTTTTTTTGATGTATAAGGATTTTTATTCACAAGACCGCTTTATAACCTCTCGTAATTTGCTATGTAAACTTTTGCCCTCACATTCTAATTTTGACAGTTAAATTACTTGACTTCATGGGGATCGTTGCCCGGCTGGTGGAAGGGGGTGTGGGGCCAGAGGGTTGGCCTCTCAACTGGGTTGGGAGCGTTCTCTGGGAAGTAATCTTGGTACATCTGGAGGGTCATAGATTCTGGCTTGGGCACAGAGTTGATTTTGTCCAGAAAAGCCTGAGCGTCAATCATCTGTTGTTTGATCTCAGCAACCATTTTCTTAGTTTCTTCGGCAGCAGCAGCCTCCTCCTTGTCAACTTCCGCTTTCAGATTTTC…
comp1910314_c0_seq1	4.4e-36	398	sp|Q9D3D9|ATPD_MOUSE	ATP synthase subunit delta, mitochondrial OS=Mus musculus GN=Atp5d PE=1 SV=1	1.1e-34	385	sp|P35434|ATPD_RAT	ATP synthase subunit delta, mitochondrial OS=Rattus norvegicus GN=Atp5d PE=1 SV=2	3.6e-34	380	sp|P05630|ATPD_BOVIN	ATP synthase subunit delta, mitochondrial OS=Bos taurus GN=ATP5D PE=1 SV=2			+	+	++		GATTTTTGCGGATTGCGCGGTGCATTCTGGGAGTGTCCTCGCCGGTTTCGCCATTTCCATCGCAATGTCACTGCTCCGATCTGCTTTGAGACTGCCCGTGTTGGCTCGGCAATGTGCCCGACTCACAACTGCACAACATGTCAGCAACAGAGGATACGCAGACATGGCTTTCACGTTTGCATGCCCCACCGATGTGTTCTACTCAGAAGCCAAAGTGAAGCAGATTGATGTGCCGTCATTCAGCGGCAGTTTTGGTATTCTTCCAGACCACGTGCCCACTCTGGCCGTCTTGAAACCAGGGGTACTTGTTGTTCATCAGGAGGATGGGGCAGCCAAGAAATATTTCGTGAGCAGTGGATCCGTCACCATCAACGATGATTCCTCAGTCCAGATCCTTGC…	>comp1910314_c0_seq1 GATTTTTGCGGATTGCGCGGTGCATTCTGGGAGTGTCCTCGCCGGTTTCGCCATTTCCATCGCAATGTCACTGCTCCGATCTGCTTTGAGACTGCCCGTGTTGGCTCGGCAATGTGCCCGACTCACAACTGCACAACATGTCAGCAACAGAGGATACGCAGACATGGCTTTCACGTTTGCATGCCCCACCGATGTGTTCTACTCAGAAGCCAAAGTGAAGCAGATTGATGTGCCGTCATTCAGCGGCAGTTTTGGTATTCTTCCAGACCACGTGCCCACTCTGGCCGTCTTGAAACCAGGGGTACTTGTTGTTCATCAGGAGGATGGGGCAGCCAAGAAATATTTCGTGAGCAGTGGATCCGTCACCATCAACGATGA…
comp2256770_c0_seq1	3e-46	494	sp|Q24439|ATPO_DROME	ATP synthase subunit O, mitochondrial OS=Drosophila melanogaster GN=ATPsynO PE=2 SV=2	4.4e-45	483	sp|B3EX21|ATPO_SORAR	ATP synthase subunit O, mitochondrial OS=Sorex araneus GN=ATP5O PE=3 SV=1	1.2e-44	479	sp|B1MT69|ATPO_PLEMO	ATP synthase subunit O, mitochondrial OS=Plecturocebus moloch GN=ATP5O PE=3 SV=1			+		+		AATTATGAAAGAAAAAATTAAAAAAAAAAAAAAATTTTTTTAAATTTTTTTTTTTTTTTATTTTTTTAACCTTCATTATATATTAACATTTATTCATCATCAACACCCAATCATGCAGCTTTTACATAATTCAATTGCTGGTCCTTTCATTTCAAAATGTCTCATGATGGTATTGCAAGCACGAAATGACTTCTGCCTTCTTCGGTTAAACAGTTCTTAAATAAGAATTTCTTAAACTTTGTATAATTTCTTCATACTCCTTGCTTGATCAGACTGGTGTATGTTTTAATCTTGCTTGCCATGGACATGTCAATGTACTGTTCTCCAATGTTGACCACCATTCCACCGATGATGCCGGGGTCAACCTGTGTCTCGACCTGAAGGACTTGGCCTTTGGCA…	>comp2256770_c0_seq1 AATTATGAAAGAAAAAATTAAAAAAAAAAAAAAATTTTTTTAAATTTTTTTTTTTTTTTATTTTTTTAACCTTCATTATATATTAACATTTATTCATCATCAACACCCAATCATGCAGCTTTTACATAATTCAATTGCTGGTCCTTTCATTTCAAAATGTCTCATGATGGTATTGCAAGCACGAAATGACTTCTGCCTTCTTCGGTTAAACAGTTCTTAAATAAGAATTTCTTAAACTTTGTATAATTTCTTCATACTCCTTGCTTGATCAGACTGGTGTATGTTTTAATCTTGCTTGCCATGGACATGTCAATGTACTGTTCTCCAATGTTGACCACCATTCCACCGATGATGCCGGGGTCAACCTGTGTCTCGACC…
comp2275478_c0_seq7	0	2654	sp|Q91V92|ACLY_MOUSE	ATP-citrate synthase OS=Mus musculus GN=Acly PE=1 SV=1	0	2648	sp|P16638|ACLY_RAT	ATP-citrate synthase OS=Rattus norvegicus GN=Acly PE=1 SV=1	0	2646	sp|P53396|ACLY_HUMAN	ATP-citrate synthase OS=Homo sapiens GN=ACLY PE=1 SV=3		+	+		++	Candidate ATP-citrate synthase	GTCAGAGGTCAGGGGGCACCTACATACATCGGCCGACCATCTGCATGTGCTGTGAGCGTGGCTGTTCGTTCATTTCAGTGGCGTGATTCTATCATTCGTGTTCACTTGTCTGGGAGTACAGGCAGTCAGAATTACTCTGACAGACTCCTGAAATAACAAGGACAGAAGTTAGGAGTGCCACTGAAACCTCATCATGTCAGCCAAAGCAGTTAACGAAGCCACAGGAAAGAACTTGCTCAACAAATGCATTGAGGGCCAGGCCGCTGTCCAGTGTAGGTTTGCTTCGGTCAGCAAAGATACCAACTGGACTGCCCTTGCCCAGGACAACCCATGGCTTAACTCAGAGAAGTTGGTCGTGAAGCCTGACCAATTGATCAAGAGAAGAGGAAAGCTGGGATT…	>comp2275478_c0_seq7_Candidate ATP-citrate synthase GTCAGAGGTCAGGGGGCACCTACATACATCGGCCGACCATCTGCATGTGCTGTGAGCGTGGCTGTTCGTTCATTTCAGTGGCGTGATTCTATCATTCGTGTTCACTTGTCTGGGAGTACAGGCAGTCAGAATTACTCTGACAGACTCCTGAAATAACAAGGACAGAAGTTAGGAGTGCCACTGAAACCTCATCATGTCAGCCAAAGCAGTTAACGAAGCCACAGGAAAGAACTTGCTCAACAAATGCATTGAGGGCCAGGCCGCTGTCCAGTGTAGGTTTGCTTCGGTCAGCAAAGATACCAACTGGACTGCCCTTGCCCAGGACAACCCATGGCTTAACTCAGAGA…
comp2189372_c0_seq1	6.3e-21	255	sp|A8XZB0|ATIF2_CAEBR	ATPase inhibitor mai-2, mitochondrial OS=Caenorhabditis briggsae GN=mai-2 PE=3 SV=1	1e-20	253	sp|O44441|ATIF2_CAEEL	ATPase inhibitor mai-2, mitochondrial OS=Caenorhabditis elegans GN=mai-2 PE=3 SV=1	2.2e-18	231	sp|P37209|ATIF1_CAEEL	ATPase inhibitor mai-1, mitochondrial OS=Caenorhabditis elegans GN=mai-1 PE=3 SV=1			+	+	++		GTTTTTTTTTCATAAGTAAAAAGAAAACCTTTAATCACATCCAACCATGATAGGTTCTTTAAATGCAATTACTGATCACCAATAAACCAGGTAGTCAAGTTGAAAATTTAGAGAAACCTGCTCATAGTCATAACATATAAGTACTTATAGATTCACTTCTTGGCCATTTCTTCTAATTCTGCTACCTTCTCCTTGTGTTTTCGAATAGCTTTCTCATGATCCTCGATCTGCTCTTTATGGAATTCAAGAGACTCCTCCACAGATTTCTTCAGGGACTGCAGCTGTTCATGTTGCATTTTGCGAAAGTATTCCTCTTCCTGGGCAGCCTGTTTCTTGCCCATGGAACCTCCTGCATCTCTGATACTACCTCCAGTGCCACCTCCCTTTCCTTCGCCAGAT…	>comp2189372_c0_seq1 GTTTTTTTTTCATAAGTAAAAAGAAAACCTTTAATCACATCCAACCATGATAGGTTCTTTAAATGCAATTACTGATCACCAATAAACCAGGTAGTCAAGTTGAAAATTTAGAGAAACCTGCTCATAGTCATAACATATAAGTACTTATAGATTCACTTCTTGGCCATTTCTTCTAATTCTGCTACCTTCTCCTTGTGTTTTCGAATAGCTTTCTCATGATCCTCGATCTGCTCTTTATGGAATTCAAGAGACTCCTCCACAGATTTCTTCAGGGACTGCAGCTGTTCATGTTGCATTTTGCGAAAGTATTCCTCTTCCTGGGCAGCCTGTTTCTTGCCCATGGAACCTCCTGCATCTCTGATACTACCTCCAGTGCCA…
comp2276461_c0_seq7	1e-05	143	sp|P17213|BPI_HUMAN	Bactericidal permeability-increasing protein OS=Homo sapiens GN=BPI PE=1 SV=4	1.7e-05	141	sp|Q2TBI0|LBP_BOVIN	Lipopolysaccharide-binding protein OS=Bos taurus GN=LBP PE=2 SV=1	2.2e-05	140	sp|P18428|LBP_HUMAN	Lipopolysaccharide-binding protein OS=Homo sapiens GN=LBP PE=1 SV=3			+		+		GGTCTCAAGAATATTCACCTAAAGTCACTGACTTCAAATGTGATAAAATCAAGTTTGTAGGAGATTATGAAGTGTGGGAAAATAGTAAAGCGGTCCCTTCGAAGGCTGGAACGTTTTCAATCACGGTCACAGGCATAAAATACCGTCAAGCTACATTTGGAATTGAATTGAGAGAAAAAGAAGAGCTGCAATCAACCCTGCGTATATATGTCAAGACTCATTCTTCCGCAGAAGGAACAACTGATTTGGAAATTACGGGAAATGATGACAATGCCACTTTAAGGGAATCGATCAGGAAGACGTTAATGAAGCGAGCACGTGATTTAACTGAAGATCTCTTCGAAGCGTCAATCAGCAGATTTGATAGTGCGGTTTACGGAAGAATTGAAGATGTGATCA…	>comp2276461_c0_seq7 GGTCTCAAGAATATTCACCTAAAGTCACTGACTTCAAATGTGATAAAATCAAGTTTGTAGGAGATTATGAAGTGTGGGAAAATAGTAAAGCGGTCCCTTCGAAGGCTGGAACGTTTTCAATCACGGTCACAGGCATAAAATACCGTCAAGCTACATTTGGAATTGAATTGAGAGAAAAAGAAGAGCTGCAATCAACCCTGCGTATATATGTCAAGACTCATTCTTCCGCAGAAGGAACAACTGATTTGGAAATTACGGGAAATGATGACAATGCCACTTTAAGGGAATCGATCAGGAAGACGTTAATGAAGCGAGCACGTGATTTAACTGAAGATCTCTTCGAAGCGTCAATCAGCAGATTTGATAGTGCGGTTTACG…
comp2274999_c0_seq4	5.4e-93	821	sp|G4RK44|TPSP_THETK	Bifunctional trehalose-6-phosphate synthase/phosphatase OS=Thermoproteus tenax (strain ATCC 35583 / DSM 2078 / JCM 9277 / NBRC 100435 / Kra 1) GN=tpsp PE=1 SV=1	7.3e-82	841	sp|Q743L8|OTSA_MYCPA	Trehalose-6-phosphate synthase OS=Mycobacterium paratuberculosis (strain ATCC BAA-968 / K-10) GN=otsA PE=3 SV=1	3.2e-81	835	sp|A0QAK7|OTSA_MYCA1	Trehalose-6-phosphate synthase OS=Mycobacterium avium (strain 104) GN=otsA PE=3 SV=1		+			+		GTCTTTTTTGTAGTTGATATCCAATAGACAGACTTTATTTCTCCTTAGTTTGTACAATCACACATTACCCAGACAGACTAGTACACTTCACAGACATATATACAACAAACTTAAATTTCTATTGGCCACAACTGACCAAATGTGTAACAATGAAAATTGTGACATGCTGAAAGCTAAAAATTGCAACTAACATTTTAATTAAAAACTGTTACTGAAGATAGACATTTTTTGAGCTTGTAAGTTGTACCGGTCCTTACGATAAAGTATTTGCAACTCCAGCAAAACCTGATCGTAAGGTAAAGAACTTTTGACCTTGGCAATTACAGTGGGTTATCTTTATTATGAATTGATTATTTGACAATTTTTGTTGCCGCTGAGCTAAAAAGTAGGTCCATGCCG…	>comp2274999_c0_seq4 GTCTTTTTTGTAGTTGATATCCAATAGACAGACTTTATTTCTCCTTAGTTTGTACAATCACACATTACCCAGACAGACTAGTACACTTCACAGACATATATACAACAAACTTAAATTTCTATTGGCCACAACTGACCAAATGTGTAACAATGAAAATTGTGACATGCTGAAAGCTAAAAATTGCAACTAACATTTTAATTAAAAACTGTTACTGAAGATAGACATTTTTTGAGCTTGTAAGTTGTACCGGTCCTTACGATAAAGTATTTGCAACTCCAGCAAAACCTGATCGTAAGGTAAAGAACTTTTGACCTTGGCAATTACAGTGGGTTATCTTTATTATGAATTGATTATTTGACAATTTTTGTTGCCGCTGAG…
comp2264068_c0_seq1	0	3375	sp|P11586|C1TC_HUMAN	C-1-tetrahydrofolate synthase, cytoplasmic OS=Homo sapiens GN=MTHFD1 PE=1 SV=3	0	3357	sp|Q5R8P0|C1TC_PONAB	C-1-tetrahydrofolate synthase, cytoplasmic OS=Pongo abelii GN=MTHFD1 PE=2 SV=3	0	3343	sp|Q922D8|C1TC_MOUSE	C-1-tetrahydrofolate synthase, cytoplasmic OS=Mus musculus GN=Mthfd1 PE=1 SV=4			+		+		AACATGACATGGAAAAATATTTATTTCTCTTCAGGCACTTCATCTAATTACTTTGATAAATTGTACAAAAATACTGTGGAAAAAGTTTTACAAAATTAGATGATGTACATATAGGCCTATATCTGCATCAAAATATCCAAGGTGATGTGTAAAATAAATTATACTGCATGACCAATCAAATTAATTTAATAAAATTTGATGTGATATCAAATAACAGAAAATAACAAAACTCCCAACAAAAAAGCAATTGAAAAATCAATTTTCAATTAATTACAAAAACATGCAGTGAATTCTCTAATGATATGACCAAGGTGGTAGATATGTCTTAACAAGTGCTTATTAACAAATTCATAAACTGACATCAAAATAGATGCCGTTCAAACTTTTGTATACAAATTT…	>comp2264068_c0_seq1 AACATGACATGGAAAAATATTTATTTCTCTTCAGGCACTTCATCTAATTACTTTGATAAATTGTACAAAAATACTGTGGAAAAAGTTTTACAAAATTAGATGATGTACATATAGGCCTATATCTGCATCAAAATATCCAAGGTGATGTGTAAAATAAATTATACTGCATGACCAATCAAATTAATTTAATAAAATTTGATGTGATATCAAATAACAGAAAATAACAAAACTCCCAACAAAAAAGCAATTGAAAAATCAATTTTCAATTAATTACAAAAACATGCAGTGAATTCTCTAATGATATGACCAAGGTGGTAGATATGTCTTAACAAGTGCTTATTAACAAATTCATAAACTGACATCAAAATAGATGCCGTT…
gnl_Pdu_trscr_assembly_1_998	1e-75	755	sp|O16305|CALM_CAEEL	Calmodulin OS=Caenorhabditis elegans GN=cmd-1 PE=1 SV=3	1.2e-75	758	sp|P62147|CALM1_BRAFL	Calmodulin-1 OS=Branchiostoma floridae PE=2 SV=2	1.2e-75	758	sp|P62148|CALM1_BRALA	Calmodulin-1 OS=Branchiostoma lanceolatum PE=2 SV=2			+		+	Group_Calmodulins	TTTTTTTTTTTTTTGAAACTATAATATTGGATCATTTTGGGCCAGTGCAGTTTTAAAAGCCATAATTGATGAGAATCACAGAACCATTGAAAATCAAAGGCATCTTTTTAAGAGTTGCAGCATCATTGGCCAATTGCAAAATGATAAACAAAGCCAAGCTTTTTATAATAGACTGTCCATGAGAGCTCATGAGCCAGAGGCATTGATTATAATGTACAGAGCAGAGGTCAATAGACAACAAGAGTTATGTAGGCGACAGGCCCTCTTTAAAGAGAATACACTGGCAGGGCTGAGTGGGGCAGGCATATCACGATATGAGCAACTTTGACCAGATGGGAATTCACACGAGGAAGTAAGCAGCACAGGAATCACGAAAATAACTTGGCGCTCAGCAAAGGA…	>gnl_Pdu_trscr_assembly_1_998_Group_Calmodulins TTTTTTTTTTTTTTGAAACTATAATATTGGATCATTTTGGGCCAGTGCAGTTTTAAAAGCCATAATTGATGAGAATCACAGAACCATTGAAAATCAAAGGCATCTTTTTAAGAGTTGCAGCATCATTGGCCAATTGCAAAATGATAAACAAAGCCAAGCTTTTTATAATAGACTGTCCATGAGAGCTCATGAGCCAGAGGCATTGATTATAATGTACAGAGCAGAGGTCAATAGACAACAAGAGTTATGTAGGCGACAGGCCCTCTTTAAAGAGAATACACTGGCAGGGCTGAGTGGGGCAGGCATATCACGATATGAGCAACTTTGACCAGATGGGAATTCACACGAGGA…
comp1916779_c0_seq1	1.4e-30	346	sp|P04352|CALM_CHLRE	Calmodulin OS=Chlamydomonas reinhardtii PE=1 SV=2	1.4e-30	346	sp|O02367|CALM_CIOIN	Calmodulin OS=Ciona intestinalis PE=2 SV=3	1.4e-30	346	sp|Q95NI4|CALM_HALOK	Calmodulin OS=Halichondria okadai PE=2 SV=3			+		+	Group_Calmodulins	TACGCTTTCATGTATCTACAGTTTATTTCTTACATTTTAACAAGTGCAAATGGGTAACATGCAAAAATATTTGTAAACTGTAAATACATGGATTTAAAGTATTCCAAAAAGTATTACTAACATGATGAATACAAAAACAAGTCACAGTCATTATACTGACAACAATTTTGCAGGCTTTCTTCTTGCATTTATAACATTAAAATTCGAAAAATAAAATTACCAGAAAGCTTGAATCAACTCAAAGATGAATTTTCAAAACTCAACATACAATACATGTATTTAATACTTGAAGTTTAAATAATTTATAAATACTTAAAATACTAAATTATTACATGTATGGAAGACTTCGTGACATGTTGAACATTAAAATGATTTAAATAAAAGAAGAGAAAATGATAA…	>comp1916779_c0_seq1_Group_Calmodulins TACGCTTTCATGTATCTACAGTTTATTTCTTACATTTTAACAAGTGCAAATGGGTAACATGCAAAAATATTTGTAAACTGTAAATACATGGATTTAAAGTATTCCAAAAAGTATTACTAACATGATGAATACAAAAACAAGTCACAGTCATTATACTGACAACAATTTTGCAGGCTTTCTTCTTGCATTTATAACATTAAAATTCGAAAAATAAAATTACCAGAAAGCTTGAATCAACTCAAAGATGAATTTTCAAAACTCAACATACAATACATGTATTTAATACTTGAAGTTTAAATAATTTATAAATACTTAAAATACTAAATTATTACATGTATGGAAGACTTCGTGACATGTTGA…
comp2254675_c0_seq1	3.1e-19	239	sp|P04352|CALM_CHLRE	Calmodulin OS=Chlamydomonas reinhardtii PE=1 SV=2	5.1e-19	237	sp|P61861|CALM_COLGL	Calmodulin OS=Colletotrichum gloeosporioides PE=2 SV=2	5.1e-19	237	sp|P61860|CALM_COLTR	Calmodulin OS=Colletotrichum trifolii PE=3 SV=2		+			+	Group_Calmodulins	TTTTTTTTTTTTTTTTAAAGTTGATAAAGACACTTTATTGTTACATAGTCTTTTGAATGACATTTTAAAACAAAATGATTATATCTTCATTAAAAGAAAGAGCTATGATGTACAAAATTGTACATAATTACCTTGAGCAATAATTTTCTAATGTTACATTAACTTACATAACAAACAGCAATGGTAAAAGAGAAATTTTATATATGGAAAAACTGCCTCCGTAAGATCTTTCTCTACACGATCATCCTCTGTTGGTAGAGTTGGACGAATTCCTCGATATCTATGAATCCGCTGCCGTCTTTATCGATCGAAGACATCATTTCATTGATTTCGTCCTCCGGCACCTCTCGCCCGAGACTTCTCATTATTTCGGCAAGTTCCGCCCGGTCGATCTGGCCG…	>comp2254675_c0_seq1_Group_Calmodulins TTTTTTTTTTTTTTTTAAAGTTGATAAAGACACTTTATTGTTACATAGTCTTTTGAATGACATTTTAAAACAAAATGATTATATCTTCATTAAAAGAAAGAGCTATGATGTACAAAATTGTACATAATTACCTTGAGCAATAATTTTCTAATGTTACATTAACTTACATAACAAACAGCAATGGTAAAAGAGAAATTTTATATATGGAAAAACTGCCTCCGTAAGATCTTTCTCTACACGATCATCCTCTGTTGGTAGAGTTGGACGAATTCCTCGATATCTATGAATCCGCTGCCGTCTTTATCGATCGAAGACATCATTTCATTGATTTCGTCCTCCGGCACCTCTCGCCCGAGACTT…
comp2269009_c0_seq1	3.1e-18	233	sp|P04352|CALM_CHLRE	Calmodulin OS=Chlamydomonas reinhardtii PE=1 SV=2	1.1e-17	228	sp|P60206|CALM_AJECG	Calmodulin OS=Ajellomyces capsulatus (strain G186AR / H82 / ATCC MYA-2454 / RMSCC 2432) GN=CAM1 PE=2 SV=2	1.1e-17	228	sp|P60205|CALM_ASPOR	Calmodulin OS=Aspergillus oryzae (strain ATCC 42149 / RIB 40) GN=cmdA PE=3 SV=2		+		+	++	Group_Calmodulins	TTTTTTATATGTAACATATCACATAAATCTCATCTTTATTAATTTCGAGAAGCAAAATTACAAATACAAAATTCTTTAACCATCTTCTACAGACTATAAGATTGAACTCAACCAGAAAGACAGGAATGCAATATTTTCAAAACATGTTATTCTATTTCTAATACTGAAAAGCCAACATCTGAGTAGAAAAATACGAAAAATACTTAACATTTTTGTATACTATAGATATTGCTTGTTGAACGCATAATACAATAACAAACATTGATAAATGCAATTGGTACGTAATAGGCAAACTATAAATATATGTGACTTTTTTCCATCATTAACAGATATATCGTATATTTTATGTACATTCTTTGGCCAGCACCAATTATAACTTTGTGATACCATATAACTCAA…	>comp2269009_c0_seq1_Group_Calmodulins TTTTTTATATGTAACATATCACATAAATCTCATCTTTATTAATTTCGAGAAGCAAAATTACAAATACAAAATTCTTTAACCATCTTCTACAGACTATAAGATTGAACTCAACCAGAAAGACAGGAATGCAATATTTTCAAAACATGTTATTCTATTTCTAATACTGAAAAGCCAACATCTGAGTAGAAAAATACGAAAAATACTTAACATTTTTGTATACTATAGATATTGCTTGTTGAACGCATAATACAATAACAAACATTGATAAATGCAATTGGTACGTAATAGGCAAACTATAAATATATGTGACTTTTTTCCATCATTAACAGATATATCGTATATTTTATGTACATTCTTTGG…
comp2226643_c0_seq1	5.3e-24	284	sp|P02599|CALM_DICDI	Calmodulin OS=Dictyostelium discoideum GN=calA PE=1 SV=3	8.7e-24	282	sp|P02594|CALM_ELEEL	Calmodulin OS=Electrophorus electricus GN=calm PE=2 SV=2	1.1e-23	281	sp|P0DP23|CALM1_HUMAN	Calmodulin-1 OS=Homo sapiens GN=CALM1 PE=1 SV=1		+			+	Group_Calmodulins	AGTTTTTTTTGTAAAAACGTAAGTTTATTCATACAATACAATGAACAAATTATTCTAAAATTTTGTGACATAAATAATGAGATCTTGTCCTCGCTGTTATTTCAAAGACATAAAATCCCAGATTTGATGTGTGACTGTTTCTCAAACATGCTTTTAACCACTGTATATATATGTTAAATATATAAATGCATCAATATTAGCTTCTATTGATATAAAGTGAATATAACATAACATGATGAAGCATGATAATTGTTGTGTATACGTATATTTGACGGTGATGGTCCACTGTAGCCAGCTGTCCAGTTATCACCTGGATTTTGAGGAGCCCAATAAACAGCTGTCTCTAATTATCACAATTGGCAGGTCTTTAACTACTGGTGGTGAGCAGCTGAACTATAT…	>comp2226643_c0_seq1_Group_Calmodulins AGTTTTTTTTGTAAAAACGTAAGTTTATTCATACAATACAATGAACAAATTATTCTAAAATTTTGTGACATAAATAATGAGATCTTGTCCTCGCTGTTATTTCAAAGACATAAAATCCCAGATTTGATGTGTGACTGTTTCTCAAACATGCTTTTAACCACTGTATATATATGTTAAATATATAAATGCATCAATATTAGCTTCTATTGATATAAAGTGAATATAACATAACATGATGAAGCATGATAATTGTTGTGTATACGTATATTTGACGGTGATGGTCCACTGTAGCCAGCTGTCCAGTTATCACCTGGATTTTGAGGAGCCCAATAAACAGCTGTCTCTAATTATCACAATTGG…
comp2280536_c0_seq1	1.4e-46	497	sp|P27165|CALM_PHYIN	Calmodulin OS=Phytophthora infestans GN=CMD1 PE=3 SV=2	1.4e-46	497	sp|Q71UH5|CALM_PYTSP	Calmodulin OS=Pythium splendens PE=2 SV=1	2.3e-46	495	sp|A8CEP3|CALM_SACJA	Calmodulin OS=Saccharina japonica GN=cam PE=2 SV=1	+				+	Group_Calmodulins	TTTTTTTTTTTTTTTTCATTTTATATTGACCCACTGAGTCATTTTATTTTTTTGATATCGTTTACAAGTTAAAAAGACAGAAACCTTACAAATGGAATGTAATTCATAATCACTATACAGAGAAACAATGATCTTCATCCCAAGGACCGATCATGAACTGAAGGAACTCATATTAAAACCCACAATATGATGATTATTAAAGAACTCATGTTCAGCGAAGATGAGATCAAGACGAAATCACAAATTGTCACTGGAATATAACTTTCTAGTACAGCCTACCAAGTCCATAACTCAGAGGTGAGGGAAAAATGCTAAAACGTTGAAATAACTAGTATCGCTACTCTACATCTTTATTCAGTGCCTATAATTGTTACAGTGCTAATTAGTATTAATAACAAT…	>comp2280536_c0_seq1_Group_Calmodulins TTTTTTTTTTTTTTTTCATTTTATATTGACCCACTGAGTCATTTTATTTTTTTGATATCGTTTACAAGTTAAAAAGACAGAAACCTTACAAATGGAATGTAATTCATAATCACTATACAGAGAAACAATGATCTTCATCCCAAGGACCGATCATGAACTGAAGGAACTCATATTAAAACCCACAATATGATGATTATTAAAGAACTCATGTTCAGCGAAGATGAGATCAAGACGAAATCACAAATTGTCACTGGAATATAACTTTCTAGTACAGCCTACCAAGTCCATAACTCAGAGGTGAGGGAAAAATGCTAAAACGTTGAAATAACTAGTATCGCTACTCTACATCTTTATTCAGTG…
gnl_Pdu_trscr_assembly_1_7327	9.3e-38	429	sp|O94739|CALM_PLEOS	Calmodulin OS=Pleurotus ostreatus GN=CMD1 PE=2 SV=3	1.2e-37	428	sp|P84339|CALM_AGABI	Calmodulin OS=Agaricus bisporus PE=1 SV=2	1.2e-37	428	sp|P11120|CALM_PLECO	Calmodulin OS=Pleurotus cornucopiae GN=CMD1 PE=1 SV=2		+			+	Group_Calmodulins	GACTTCCTCAAGTGAAAAATACATGGCTCAGTTCTCAGAAGAACAAATTGAAGATTACAGACAAGCATTCAACATGTTCGACAGAGACTGCAGTGGCGCCATCTCAATGGACGAACTAGGAGTAGTCATGAAAAATTTGGGGATGACTCCTTCAGAGGAAGAACTGAAAGACATGATCCGAGAACACGACACAGATGAAAGTGGCCAGATCGAGTTTCCCGAATTCTGTGAACTGATCCAGAAACACACATGTGAAGACAAGGAAGAGACATTGAAAGCCGCGTTTAAAACATTCGACCAAGATGGGTCAGGAAAAATATCAGCTGAGGAATTGCGCAAAGTAATGCACACCCTCGGTGAACGTTTAACGGATGACGAAATCAGTGAAATGATCATAGA…	>gnl_Pdu_trscr_assembly_1_7327_Group_Calmodulins GACTTCCTCAAGTGAAAAATACATGGCTCAGTTCTCAGAAGAACAAATTGAAGATTACAGACAAGCATTCAACATGTTCGACAGAGACTGCAGTGGCGCCATCTCAATGGACGAACTAGGAGTAGTCATGAAAAATTTGGGGATGACTCCTTCAGAGGAAGAACTGAAAGACATGATCCGAGAACACGACACAGATGAAAGTGGCCAGATCGAGTTTCCCGAATTCTGTGAACTGATCCAGAAACACACATGTGAAGACAAGGAAGAGACATTGAAAGCCGCGTTTAAAACATTCGACCAAGATGGGTCAGGAAAAATATCAGCTGAGGAATTGCGCAAAGTAATGCACA…
comp2267732_c0_seq2	3.9e-18	237	sp|Q9JM83|CALM4_MOUSE	Calmodulin-4 OS=Mus musculus GN=Calm4 PE=2 SV=2	3.7e-17	228	sp|P62184|CALM_RENRE	Calmodulin OS=Renilla reniformis PE=1 SV=2	1.6e-16	222	sp|P02595|CALM_PATSP	Calmodulin OS=Patinopecten sp. PE=1 SV=2	+	+			++	Group_Calmodulins	TTTTTTTTTTTTTTTTTTTGTTTTCTTTTTTTAATTTCAAATCATTTTGTACATTTTAACCGTGTAAAACAAAACAACACACAGACAAATCTCAACATGAACAGATAATGTTCTTCAAGTCTTATATAATTTGTGATTTATGCAAAAACTTCAAGTTTCGGTTCATTTCAGGTAAACGTCTTATTATAGAACTTGATCAAACCCGTTAGTATTCAAATACAGTTCGTTTGTGAATGTTAACACATAAAATTTGCTGGACAATTTCGTTGTTACAAAAACTGGTTACTCCGAAACTTTAGAAAAACGTTTACACCAATAAAGTCATCATTTACATTTATAAAATTTGTTTCGTATTGTATCAAACATTTTATATCAAACACATTTTGTATCACATGCTTT…	>comp2267732_c0_seq2_Group_Calmodulins TTTTTTTTTTTTTTTTTTTGTTTTCTTTTTTTAATTTCAAATCATTTTGTACATTTTAACCGTGTAAAACAAAACAACACACAGACAAATCTCAACATGAACAGATAATGTTCTTCAAGTCTTATATAATTTGTGATTTATGCAAAAACTTCAAGTTTCGGTTCATTTCAGGTAAACGTCTTATTATAGAACTTGATCAAACCCGTTAGTATTCAAATACAGTTCGTTTGTGAATGTTAACACATAAAATTTGCTGGACAATTTCGTTGTTACAAAAACTGGTTACTCCGAAACTTTAGAAAAACGTTTACACCAATAAAGTCATCATTTACATTTATAAAATTTGTTTCGTATTGTATC…
comp2139115_c0_seq1	2.5e-168	1646	sp|P27797|CALR_HUMAN	Calreticulin OS=Homo sapiens GN=CALR PE=1 SV=1	2.5e-168	1646	sp|P28491|CALR_PIG	Calreticulin OS=Sus scrofa GN=CALR PE=1 SV=3	3.2e-168	1645	sp|Q4VIT5|CALR_CHLAE	Calreticulin OS=Chlorocebus aethiops GN=CALR PE=2 SV=1		+		+	++	Candidate Calreticulin	TGAAGTTTGGTACACATATGGCTTATATGGTCTAGTTGTGCCTTTTCATTGTCTGACAGATGGCTCTTCCATAGTTTCTGTAATATTGAGAAAAAATTTTTTTTTTTTTTATATTTTATAAATTTTTATTACAAATAAAAAGACTAAGACATTTAAGTCTTCAACAACTTGCGTGAAAATAATGCCAAAATGTTCAATACAACAGATGCTGCACCACCCATATGTTAATACACTGTTACACGTAATTAACTACACCTTGAGACACACAGGAGAGTATAGTTCTTCCCCAATATTTGAAAACTCATTTTCTAGCATTTTACACAATCATTCAAATTCGTTCACACATATAAATCTGAATTAACCAAATCTGTGGGAGTGAAGCATGTATGATGAAGACCG…	>comp2139115_c0_seq1_Candidate Calreticulin TGAAGTTTGGTACACATATGGCTTATATGGTCTAGTTGTGCCTTTTCATTGTCTGACAGATGGCTCTTCCATAGTTTCTGTAATATTGAGAAAAAATTTTTTTTTTTTTTATATTTTATAAATTTTTATTACAAATAAAAAGACTAAGACATTTAAGTCTTCAACAACTTGCGTGAAAATAATGCCAAAATGTTCAATACAACAGATGCTGCACCACCCATATGTTAATACACTGTTACACGTAATTAACTACACCTTGAGACACACAGGAGAGTATAGTTCTTCCCCAATATTTGAAAACTCATTTTCTAGCATTTTACACAATCATTCAAATTCGTTCACACATATAAATCTG…
comp2256216_c0_seq9	3.7e-158	1550	sp|P12370|KAPC_DROME	cAMP-dependent protein kinase catalytic subunit OS=Drosophila melanogaster GN=Pka-C1 PE=1 SV=3	2.1e-157	1543	sp|P27791|KAPCA_RAT	cAMP-dependent protein kinase catalytic subunit alpha OS=Rattus norvegicus GN=Prkaca PE=1 SV=2	2.6e-157	1542	sp|P05132|KAPCA_MOUSE	cAMP-dependent protein kinase catalytic subunit alpha OS=Mus musculus GN=Prkaca PE=1 SV=3		+			+		AGAGTACCAGATGAGGAGAGTACGAGAGATTAGCACTCGCATGCAGTCACTGGAGGACGCGGCGTATGTCGAGAATTGTTTCAGAGAAATGTTTCAGAGAATTGTTTCAGAAATAGAGAATCTATTAGAACAGTCTATTTGGGACCACCTGCATTCAATAAAGTGCAGACAATGACCTAAACGTGGACAAGTGGTCAAGGTTGTTGTATTGATAACTTATTAATTACGGTATCAACTGTGTGTATTGAAGATAGCCTTGACCTCTGGACCAGTGTGGGGCAATTGAGCAAAGCAATTAAGAGCTAATCCTCCACTGGTCTGCCCCGCACAGGTCTGGAAGGCCACAGAATGGTAAATGACTAGTTTGGCGAGTAGACGACCAAGGTAGCATGTGAGGCA…	>comp2256216_c0_seq9 AGAGTACCAGATGAGGAGAGTACGAGAGATTAGCACTCGCATGCAGTCACTGGAGGACGCGGCGTATGTCGAGAATTGTTTCAGAGAAATGTTTCAGAGAATTGTTTCAGAAATAGAGAATCTATTAGAACAGTCTATTTGGGACCACCTGCATTCAATAAAGTGCAGACAATGACCTAAACGTGGACAAGTGGTCAAGGTTGTTGTATTGATAACTTATTAATTACGGTATCAACTGTGTGTATTGAAGATAGCCTTGACCTCTGGACCAGTGTGGGGCAATTGAGCAAAGCAATTAAGAGCTAATCCTCCACTGGTCTGCCCCGCACAGGTCTGGAAGGCCACAGAATGGTAAATGACTAGTTTGGCGAGTAGACG…
comp2276719_c0_seq5	8.6e-62	653	sp|P83299|CAH1_CHIHA	Carbonic anhydrase 1 OS=Chionodraco hamatus GN=ca1 PE=1 SV=1	1.8e-61	650	sp|Q8UWA5|CAH2_TRIHK	Carbonic anhydrase 2 OS=Tribolodon hakonensis GN=ca2 PE=2 SV=3	4e-59	628	sp|Q8HY33|CAH1_MONDO	Carbonic anhydrase 1 OS=Monodelphis domestica GN=CA1 PE=2 SV=1		+			+	Group Carbonic anhydrase	GTAATAAGTTGTAACACATCTCTTTATTTCTGCAGATGATAGATACATTGGCATTTATATTTATTAACAATCATTCGACCATCACATTTTTGGAAGCAGGTGCAACATAGAATCTTTACACATTCGAGATTATTTCACTACAAGCACACATTTTTGCAGCTCCAAACCTATAAATAAAGACATATAATTATGAGATTATATAGGATTTTCTTAGTTCATAAATGCAATCATGTACAATGCAAACTGGAGGTAAAGTTTTCAAACCCTTCATTTGCTGTTCAAATGCCTTGGCTAACGCCATCGAATACTGCTTTCATTTCATCACTTGTCATCATTCATCACATATATAGGATATCTCTGATATGATTTTATAACAGAATCCTCTGGTAATACATGTTA…	>comp2276719_c0_seq5_Group Carbonic anhydrase GTAATAAGTTGTAACACATCTCTTTATTTCTGCAGATGATAGATACATTGGCATTTATATTTATTAACAATCATTCGACCATCACATTTTTGGAAGCAGGTGCAACATAGAATCTTTACACATTCGAGATTATTTCACTACAAGCACACATTTTTGCAGCTCCAAACCTATAAATAAAGACATATAATTATGAGATTATATAGGATTTTCTTAGTTCATAAATGCAATCATGTACAATGCAAACTGGAGGTAAAGTTTTCAAACCCTTCATTTGCTGTTCAAATGCCTTGGCTAACGCCATCGAATACTGCTTTCATTTCATCACTTGTCATCATTCATCACATATATAGGAT…
comp2232805_c0_seq1	5e-60	624	sp|P00920|CAH2_MOUSE	Carbonic anhydrase 2 OS=Mus musculus GN=Ca2 PE=1 SV=4	2.8e-59	617	sp|Q9D6N1|CAH13_MOUSE	Carbonic anhydrase 13 OS=Mus musculus GN=Ca13 PE=1 SV=1	2.8e-59	617	sp|Q8UWA5|CAH2_TRIHK	Carbonic anhydrase 2 OS=Tribolodon hakonensis GN=ca2 PE=2 SV=3	+				+	Group Carbonic anhydrase	TACTTCAGAGCACTCCAGCTTCCAGAACACAGCACACACAATCAGCAAAAAATGACATCTTGGGGTTACTGCAGCCACAATGGACCAAGCACATGGCCCGACAATTTCCCTAAAGCAGGGGGCAAGAGACAATCCCCAATCGACATCAAACCAGCACAAGCCAAAAAAGATGACGACCTGGCAAAAAATCCTCTTGAAATGACACACTGTGCGGCCAGCGCGGGTACCTTCACCAACACTGGCGCTTCCGTTATGCTGCCTTACAAATTCGAGGGTTCTTCATTGAAAGGAGGCCCCTTGACAGAAAACTACCAACTTGCCCAATTCCACTTCCACTGGGGCAAGTGCAACGAGACCGGATCAGAACACACCGTCGATGGAAAGATGTTTGCTGCAGAG…	>comp2232805_c0_seq1_Group Carbonic anhydrase TACTTCAGAGCACTCCAGCTTCCAGAACACAGCACACACAATCAGCAAAAAATGACATCTTGGGGTTACTGCAGCCACAATGGACCAAGCACATGGCCCGACAATTTCCCTAAAGCAGGGGGCAAGAGACAATCCCCAATCGACATCAAACCAGCACAAGCCAAAAAAGATGACGACCTGGCAAAAAATCCTCTTGAAATGACACACTGTGCGGCCAGCGCGGGTACCTTCACCAACACTGGCGCTTCCGTTATGCTGCCTTACAAATTCGAGGGTTCTTCATTGAAAGGAGGCCCCTTGACAGAAAACTACCAACTTGCCCAATTCCACTTCCACTGGGGCAAGTGCAACGA…
comp2273900_c0_seq1	5e-108	1077	sp|A5A6K7|CBPE_PANTR	Carboxypeptidase E OS=Pan troglodytes GN=CPE PE=2 SV=1	8.1e-108	1075	sp|P16870|CBPE_HUMAN	Carboxypeptidase E OS=Homo sapiens GN=CPE PE=1 SV=1	3.5e-107	1069	sp|P15087|CBPE_RAT	Carboxypeptidase E OS=Rattus norvegicus GN=Cpe PE=1 SV=1	+		+		++		TTTTTTTTTTTTTTTTGGGGGGAATTTTTATTTCTTGCCAGAAGATAATGCCAAACTAATTTTTTAACAGTAACATAAAAACTTTTAACACTATTTATAAGAATTATAAATGGAATTCATTTCAACAACAATAATCACTGGATGAAAAATATAGGCCCTACACACTTGTACATTACCATTTGATATGTAATGTGTGTACTCTTACATGTGGAATATTTCTGGAACGCCTTTCAAGCTACTCTCAATTCCTGTTAGTTAGGAATGCATAATTATAATATCAACTGTGTTATAAGTTTAAAATACCATTAAAATGTCCATGAACCATGCAATACAAAATATGTTATTAGCAAATTCGTAATTCATGAAAAACGAATGGAAAAATTAGAAAAAAAAGTTGCA…	>comp2273900_c0_seq1 TTTTTTTTTTTTTTTTGGGGGGAATTTTTATTTCTTGCCAGAAGATAATGCCAAACTAATTTTTTAACAGTAACATAAAAACTTTTAACACTATTTATAAGAATTATAAATGGAATTCATTTCAACAACAATAATCACTGGATGAAAAATATAGGCCCTACACACTTGTACATTACCATTTGATATGTAATGTGTGTACTCTTACATGTGGAATATTTCTGGAACGCCTTTCAAGCTACTCTCAATTCCTGTTAGTTAGGAATGCATAATTATAATATCAACTGTGTTATAAGTTTAAAATACCATTAAAATGTCCATGAACCATGCAATACAAAATATGTTATTAGCAAATTCGTAATTCATGAAAAACGAATGGAA…
comp2257693_c0_seq3	9.3e-11	124	sp|P51942|MATN1_MOUSE	Cartilage matrix protein OS=Mus musculus GN=Matn1 PE=2 SV=2	1.5e-10	121	sp|P21941|MATN1_HUMAN	Cartilage matrix protein OS=Homo sapiens GN=MATN1 PE=1 SV=1	3.6e-09	138	sp|P15989|CO6A3_CHICK	Collagen alpha-3(VI) chain OS=Gallus gallus GN=COL6A3 PE=2 SV=2				+	+		CCCCCCCCCAGTTCCTCTCCACTCAGCTGTCAGGTGTATTATATGGTCAGATAGGCTCAGGGAACCTTCAGGGATATACCATAATCAGCCTGCAGTAGTTGGTTGCAAATAAACCTGTTGCTGTTGCCAATAAACCTGGTCCATGCATTTCGGATTTTAAGCAACTCATATTTCACCAAGATGATTCGGTGGAAACTTTTAGCCTTGGCCATCTCATTATCATTAGTTCCTGCAGTTTCCCCACAAGCATGTACACAGAATTTAGACGTGCTATTCTTAACAGATAGCAGTGATAACGGAGCACAGTGGGAGAACGTATTAAGATACCTGGCAGAATTAACGACATACCTAGGTGATCTCAATTATGGCATGGTCACCTACGCACAGCAGGCAGTCATC…	>comp2257693_c0_seq3 CCCCCCCCCAGTTCCTCTCCACTCAGCTGTCAGGTGTATTATATGGTCAGATAGGCTCAGGGAACCTTCAGGGATATACCATAATCAGCCTGCAGTAGTTGGTTGCAAATAAACCTGTTGCTGTTGCCAATAAACCTGGTCCATGCATTTCGGATTTTAAGCAACTCATATTTCACCAAGATGATTCGGTGGAAACTTTTAGCCTTGGCCATCTCATTATCATTAGTTCCTGCAGTTTCCCCACAAGCATGTACACAGAATTTAGACGTGCTATTCTTAACAGATAGCAGTGATAACGGAGCACAGTGGGAGAACGTATTAAGATACCTGGCAGAATTAACGACATACCTAGGTGATCTCAATTATGGCATGGTCACC…
comp2261191_c0_seq5	2.1e-64	673	sp|Q08DY9|CASP3_BOVIN	Caspase-3 OS=Bos taurus GN=CASP3 PE=2 SV=1	5.7e-64	669	sp|P55210|CASP7_HUMAN	Caspase-7 OS=Homo sapiens GN=CASP7 PE=1 SV=1	7.3e-64	668	sp|P55214|CASP7_MESAU	Caspase-7 OS=Mesocricetus auratus GN=CASP7 PE=1 SV=1			+		+		CCAGGCAAAATTGAAGAGGAGAGATCTCAACTTCAACCGCTTTTGAGACTCTGCCACCACGACAAGCCTGGATGAAACACAGCTTTGGTTTGCCCGCAAGACCAGGGCATTGAGCTTCGGTGAGTGGTGCAAGTAAAGTGTCTATTTTGATGTCTCTGTCAGTTCCCCAGATCCAGTCAGTCCTAGATTTATAGTTGACTCCCTCCTCATCTAATGGATCTCCATGACTGGATATGACACACACAAAGCAGTCCATCTTCTCAATATCTTTGTCTCCTGTCGCTTGCTTCATGCGATCTAACATCTGGCTGGCTGTCTGATTGAAGTAAGCCTTCACTTCAAATCCCAGTCTTCTAAAAGTTTTTTCAGCCATTTCAAGGTCTTTCCTGGCACCACGTC…	>comp2261191_c0_seq5 CCAGGCAAAATTGAAGAGGAGAGATCTCAACTTCAACCGCTTTTGAGACTCTGCCACCACGACAAGCCTGGATGAAACACAGCTTTGGTTTGCCCGCAAGACCAGGGCATTGAGCTTCGGTGAGTGGTGCAAGTAAAGTGTCTATTTTGATGTCTCTGTCAGTTCCCCAGATCCAGTCAGTCCTAGATTTATAGTTGACTCCCTCCTCATCTAATGGATCTCCATGACTGGATATGACACACACAAAGCAGTCCATCTTCTCAATATCTTTGTCTCCTGTCGCTTGCTTCATGCGATCTAACATCTGGCTGGCTGTCTGATTGAAGTAAGCCTTCACTTCAAATCCCAGTCTTCTAAAAGTTTTTTCAGCCATTTCAA…
comp2262339_c0_seq1	6.5e-106	1057	sp|Q26636|CATL_SARPE	Cathepsin L OS=Sarcophaga peregrina PE=1 SV=1	1.2e-104	1045	sp|Q95029|CATL_DROME	Cathepsin L OS=Drosophila melanogaster GN=Cp1 PE=2 SV=2	1e-93	942	sp|Q9GL24|CATL1_CANLF	Cathepsin L1 OS=Canis lupus familiaris GN=CTSL PE=2 SV=1		+			+		CGATGAGGGTTTGTAAAGGGGAAATCCTGTTTGTATGTGTGGGTTTTGAGGTATATATAAGCTGCATAACCAAACTTGGAATCATTCTCTAATTTGTCAGCAACAGGTTCAGTATTCATACAGATCTCAACTAAAACAGCAACATGAAGGTTATCCTTGCTGCCTGTCTCATCGCAGTTGTCACTGCTGATGTGCTTCGTTTTGAAAGTCTTTCAAAAGTTGATAAACTATGGGAAGATTTCAAGTCGACACACAGTAAGAAATATGAAAGCATACATGAAGAAAGTGCCAGGAAAGATATCTTTATTGGAAACTTGAAAAAGATTGAAATGCACAACTACCTTCATGACAAGGGCGTCAAGTCTTACAGATTGGGAGTCAATGAATATGCTGATATGG…	>comp2262339_c0_seq1 CGATGAGGGTTTGTAAAGGGGAAATCCTGTTTGTATGTGTGGGTTTTGAGGTATATATAAGCTGCATAACCAAACTTGGAATCATTCTCTAATTTGTCAGCAACAGGTTCAGTATTCATACAGATCTCAACTAAAACAGCAACATGAAGGTTATCCTTGCTGCCTGTCTCATCGCAGTTGTCACTGCTGATGTGCTTCGTTTTGAAAGTCTTTCAAAAGTTGATAAACTATGGGAAGATTTCAAGTCGACACACAGTAAGAAATATGAAAGCATACATGAAGAAAGTGCCAGGAAAGATATCTTTATTGGAAACTTGAAAAAGATTGAAATGCACAACTACCTTCATGACAAGGGCGTCAAGTCTTACAGATTGGGAG…
comp2263291_c0_seq2	2.1e-86	873	sp|Q26534|CATL_SCHMA	Cathepsin L OS=Schistosoma mansoni GN=CL1 PE=2 SV=1	7.2e-84	849	sp|Q9VN93|CPR1_DROME	Putative cysteine proteinase CG12163 OS=Drosophila melanogaster GN=CG12163 PE=2 SV=2	5.8e-82	831	sp|Q9R013|CATF_MOUSE	Cathepsin F OS=Mus musculus GN=Ctsf PE=1 SV=1		+			+		CTTACAAGGAAAATGGCGAAGGCAACGGTTGTGTTGTTGTTCGCCTTGGCTCTTTCATGCCATTCTCTGGCCTCAGCAATGCCCGGAGGATGGACCGAGCACGACCTCAGTGTCAATGACGTAGCAGTGCAGAAATTGGTAAACGAAGTAAAACCCATGGCAGAGATTGCTGTGAAAAATCTAGAAGCCAAGAGCAACACCATGTTTGCCTCCAAGTTGCTGGAAATCACAGGAGTCAAAACCCAAATCGTCGCTGGTGTAAATTACAACATCTCCTTTTCCGTTGGCGTTACCGAATGTAGGAAAGGTCAGACAAGCAAAGATAAACTGGAATCATGCAAAATAACAGAGACTCAAGACTGTTGGACTAAGTGGTATGTTGTGCCCTGGGAAAAATCA…	>comp2263291_c0_seq2 CTTACAAGGAAAATGGCGAAGGCAACGGTTGTGTTGTTGTTCGCCTTGGCTCTTTCATGCCATTCTCTGGCCTCAGCAATGCCCGGAGGATGGACCGAGCACGACCTCAGTGTCAATGACGTAGCAGTGCAGAAATTGGTAAACGAAGTAAAACCCATGGCAGAGATTGCTGTGAAAAATCTAGAAGCCAAGAGCAACACCATGTTTGCCTCCAAGTTGCTGGAAATCACAGGAGTCAAAACCCAAATCGTCGCTGGTGTAAATTACAACATCTCCTTTTCCGTTGGCGTTACCGAATGTAGGAAAGGTCAGACAAGCAAAGATAAACTGGAATCATGCAAAATAACAGAGACTCAAGACTGTTGGACTAAGTGGTAT…
comp2276783_c0_seq3	6.1e-94	944	sp|Q29HY3|CDC42_DROPS	Cdc42 homolog OS=Drosophila pseudoobscura pseudoobscura GN=Cdc42 PE=3 SV=1	7.8e-94	943	sp|Q16YG0|CDC42_AEDAE	Cdc42 homolog OS=Aedes aegypti GN=Cdc42 PE=3 SV=1	1e-93	942	sp|P40793|CDC42_DROME	Cdc42 homolog OS=Drosophila melanogaster GN=Cdc42 PE=1 SV=1		+			+		TCTTTAGACAGTAGGCCATCTTGTTTTCTTGCTGTGGTGATCGGGCCTACTGTCGAAAGACCGATCGAAAAATCAGCCGAAAATGCAGACGATAAAGTGTGTCGTGGTGGGCGATGGAGCCGTGGGTAAAACCTGCCTACTTATTTCATACACTACCAACAAATTCCCCTCAGAATATGTCCCCACAGTATTTGACAATTACGCTGTCACTGTTATGATCGGAGGAGAACCTTACACATTAGGATTATTTGACACAGCTGGTCAGGAGGATTACGACAGACTCAGACCTCTCAGCTACCCTCAGACCGACGTATTTCTTGTTTGTTTCTCAGTAGTCTCTCCCTCTTCTTTCGAAAACGTCAAGGAAAAGTGGGTGCCAGAGATTGCCCACCATTGTCA…	>comp2276783_c0_seq3 TCTTTAGACAGTAGGCCATCTTGTTTTCTTGCTGTGGTGATCGGGCCTACTGTCGAAAGACCGATCGAAAAATCAGCCGAAAATGCAGACGATAAAGTGTGTCGTGGTGGGCGATGGAGCCGTGGGTAAAACCTGCCTACTTATTTCATACACTACCAACAAATTCCCCTCAGAATATGTCCCCACAGTATTTGACAATTACGCTGTCACTGTTATGATCGGAGGAGAACCTTACACATTAGGATTATTTGACACAGCTGGTCAGGAGGATTACGACAGACTCAGACCTCTCAGCTACCCTCAGACCGACGTATTTCTTGTTTGTTTCTCAGTAGTCTCTCCCTCTTCTTTCGAAAACGTCAAGGAAAAGTGGGTGCC…
comp2261876_c0_seq1	1.2e-09	181	sp|A8XMW6|CED1_CAEBR	Cell death abnormality protein 1 OS=Caenorhabditis briggsae GN=ced-1 PE=3 SV=2	1.3e-09	183	sp|P10039|TENA_CHICK	Tenascin OS=Gallus gallus GN=TNC PE=1 SV=2	1.4e-09	182	sp|O75095|MEGF6_HUMAN	Multiple epidermal growth factor-like domains protein 6 OS=Homo sapiens GN=MEGF6 PE=1 SV=4		+			+		GTAGTTTCATCATATTGGAGATACCTCTCTCAAAATTTACAATATTGGCTTTGAAAATATTTTGAAACTGATACAGCAATTACATAAGTTAAATTCGAAAAAAAAGAAACAGATTAATCATACGTAAAAATTTAGAAACATTTAATTTCATCAAATCGGAGATACTTATCTGAAAATTTACAATATAGGCTTTGAAAATATTTTGAGACTGTTAAATCAATTATAAATTTTCAATCTGGGGAAGAAAACAGATGAATCAACATCTACTTTGAAGAACTGCCACGATAACAGAAATTGTTGCCAATAAAATTCCACTCTTGATTGCTGAGGCTCCTTGACAGACTAATTTGTTCTGGTTTGGACACTTCTTGCACGTCAAATCTTCTCCACAATATTTTC…	>comp2261876_c0_seq1 GTAGTTTCATCATATTGGAGATACCTCTCTCAAAATTTACAATATTGGCTTTGAAAATATTTTGAAACTGATACAGCAATTACATAAGTTAAATTCGAAAAAAAAGAAACAGATTAATCATACGTAAAAATTTAGAAACATTTAATTTCATCAAATCGGAGATACTTATCTGAAAATTTACAATATAGGCTTTGAAAATATTTTGAGACTGTTAAATCAATTATAAATTTTCAATCTGGGGAAGAAAACAGATGAATCAACATCTACTTTGAAGAACTGCCACGATAACAGAAATTGTTGCCAATAAAATTCCACTCTTGATTGCTGAGGCTCCTTGACAGACTAATTTGTTCTGGTTTGGACACTTCTTGCACGTCA…
comp2236007_c0_seq2	1.9e-19	241	sp|P40220|RABP1_CHICK	Cellular retinoic acid-binding protein 1 OS=Gallus gallus GN=CRABP1 PE=2 SV=4	4e-19	238	sp|P62964|RABP1_BOVIN	Cellular retinoic acid-binding protein 1 OS=Bos taurus GN=CRABP1 PE=1 SV=2	4e-19	238	sp|P29762|RABP1_HUMAN	Cellular retinoic acid-binding protein 1 OS=Homo sapiens GN=CRABP1 PE=1 SV=2		+			+		GAGTGATGATGCCCTGACCCAGTGGGATGGGTGTAATAAGTGTGTCAGGGCTGACAGGGCAACAGATTATGGCATTAAAAGTGGATTGACAAGGGGAGGGCCATAAGAGGAGCAGACAGCACTGTCCCCACAAGTGCTTCCTTCCTTTCACACAAAAAGGGCATCACCTTGGCAACTGCTTCAGTCTCATCTTGGCTCTCTGGTCACCATGGCAAACCTATCTGGAACCTGGAAGTTAGAGAAAAATGAAAACTTCGATGACTACCTGAAGGCTCTTGGGATGGGGGCAGTGAAGAGGAAGGTTGCCCTGGCCACCAGCCCCACCATGGAGATCAAGCAAGATGGAACTCACTTCTACATCAAGACTTCCACAATGGTCAGCACCCAGGTCATGGACTT…	>comp2236007_c0_seq2 GAGTGATGATGCCCTGACCCAGTGGGATGGGTGTAATAAGTGTGTCAGGGCTGACAGGGCAACAGATTATGGCATTAAAAGTGGATTGACAAGGGGAGGGCCATAAGAGGAGCAGACAGCACTGTCCCCACAAGTGCTTCCTTCCTTTCACACAAAAAGGGCATCACCTTGGCAACTGCTTCAGTCTCATCTTGGCTCTCTGGTCACCATGGCAAACCTATCTGGAACCTGGAAGTTAGAGAAAAATGAAAACTTCGATGACTACCTGAAGGCTCTTGGGATGGGGGCAGTGAAGAGGAAGGTTGCCCTGGCCACCAGCCCCACCATGGAGATCAAGCAAGATGGAACTCACTTCTACATCAAGACTTCCACAATGGT…
comp2107035_c0_seq2	0.2	110	sp|Q9C105|YKT4_SCHPO	Chitinase-like protein PB1E7.04c OS=Schizosaccharomyces pombe (strain 972 / ATCC 24843) GN=SPAPB1E7.04c PE=3 SV=1	0.36	103	sp|O94317|YH5D_SCHPO	Uncharacterized serine-rich protein C215.13 OS=Schizosaccharomyces pombe (strain 972 / ATCC 24843) GN=SPBC215.13 PE=1 SV=1	0.016	93	sp|Q17RH7|TPRXL_HUMAN	Putative protein TPRXL OS=Homo sapiens GN=TPRXL PE=5 SV=2				+	+		CTTTTTTCTTTCACATGTTTTATTAAAATAACACGTTTCATATAAACGTGACTTACTGGAAAGTCTGACAAAAATGAGGCTGCATTGAGAAGTGGTGGGGGCAGACAGCAGCCCCTAGAAGTTGCGACCGATCGAAGCAACAAAACAGAAGAGTCTCTAACTAAAACGGAGATATACAGACAGGTTCGGTGAACCCAGGAAATACTTGAAAGTAAAATAAGTATAAAACTGCAGTATTGATTGTTTCGCATAGCGCGTGATAATATCATTAACAAAAAGCACAGTTAGAGCATTCAATTCAATGTTTGGCGGTGCATATTAATCTAGGCAGTGGTGGCAGGGGCTTCTGACCCTTCCACCATGGCTGCTAAGTCTTTCTTGCCCAGTTTTTTTAGGGCT…	>comp2107035_c0_seq2 CTTTTTTCTTTCACATGTTTTATTAAAATAACACGTTTCATATAAACGTGACTTACTGGAAAGTCTGACAAAAATGAGGCTGCATTGAGAAGTGGTGGGGGCAGACAGCAGCCCCTAGAAGTTGCGACCGATCGAAGCAACAAAACAGAAGAGTCTCTAACTAAAACGGAGATATACAGACAGGTTCGGTGAACCCAGGAAATACTTGAAAGTAAAATAAGTATAAAACTGCAGTATTGATTGTTTCGCATAGCGCGTGATAATATCATTAACAAAAAGCACAGTTAGAGCATTCAATTCAATGTTTGGCGGTGCATATTAATCTAGGCAGTGGTGGCAGGGGCTTCTGACCCTTCCACCATGGCTGCTAAGTCTTTC…
comp2269230_c0_seq2	5.3e-10	194	sp|Q9C105|YKT4_SCHPO	Chitinase-like protein PB1E7.04c OS=Schizosaccharomyces pombe (strain 972 / ATCC 24843) GN=SPAPB1E7.04c PE=3 SV=1	1.2e-06	166	sp|A1C3L3|FAP1_STRPA	Fap1 adhesin OS=Streptococcus parasanguinis GN=fap1 PE=1 SV=1	1.8e-06	166	sp|Q4L9P0|SRAP_STAHJ	Serine-rich adhesin for platelets OS=Staphylococcus haemolyticus (strain JCSC1435) GN=sraP PE=3 SV=1			+		+		CAATGATGGTGGTGTCGCGATGTAAACATTATGGAGGCAAAAATGAACATTTCGACCTGTTTTGAAGCCTTTATTTCGTGAAAATGCTTTATTGACGCAATCAAAGATGTAACAGAGCAATTATGACGTGATATGCTGGGTGTATTCTGGCAGCCGTCAGTGCAGTGAGCTGCCAAGAAATAGATCCGATATGCAGGGCTTGAACGGAATGTCAATCGGTGAAGTTATTGAACAACTTCAAACGATAACTTCGGTGAGCCGAGAAGTGCTGCTGTTGCATTCGCTTGTTGGAAACCTCTGTCCATCTTCTACATGTTCTATCAATGGTTCAAAATCGATTGACGAGGATGCAGTGTTTGACACTGACATGTACGGTCCAATTAGTTTGGAATCTCACCA…	>comp2269230_c0_seq2 CAATGATGGTGGTGTCGCGATGTAAACATTATGGAGGCAAAAATGAACATTTCGACCTGTTTTGAAGCCTTTATTTCGTGAAAATGCTTTATTGACGCAATCAAAGATGTAACAGAGCAATTATGACGTGATATGCTGGGTGTATTCTGGCAGCCGTCAGTGCAGTGAGCTGCCAAGAAATAGATCCGATATGCAGGGCTTGAACGGAATGTCAATCGGTGAAGTTATTGAACAACTTCAAACGATAACTTCGGTGAGCCGAGAAGTGCTGCTGTTGCATTCGCTTGTTGGAAACCTCTGTCCATCTTCTACATGTTCTATCAATGGTTCAAAATCGATTGACGAGGATGCAGTGTTTGACACTGACATGTACGGTCC…
comp1953077_c0_seq1	0.026	115	sp|P02893|CSP_PLAFA	Circumsporozoite protein OS=Plasmodium falciparum PE=3 SV=1	0.028	119	sp|Q8IYB3|SRRM1_HUMAN	Serine/arginine repetitive matrix protein 1 OS=Homo sapiens GN=SRRM1 PE=1 SV=2	0.054	116	sp|Q5BIR3|THSD1_BOVIN	Thrombospondin type-1 domain-containing protein 1 OS=Bos taurus GN=THSD1 PE=2 SV=1		+	+		++	Candidate Circumsporozoite protein	AGTTTTTTTTTTTTTTTTACGGTACGTCATAATTTTATTCGGCAGACATTCAATCGGCTCATATTTTCCTTAGTGGTAGGCAGTCGTAATGATGACATTAGGCTGCGAGTCCAAGCCAACAGGGGAATATATACCCTCACTTATCATCCTCATATCCAATTATGGTAGACCCAAGGGCGGTCTCTGTTTACTACCTCAACACAACAGCATAGCGACACAGTAGATATAAAGGCATAACTGCAGTGGATGTATTAATAAGCAAATTTCAAAAGGAGCATATACAACACTACCAAATATGGTCATAACAGGATGCCCAAATATGGTCATAATGAGATGACAAGGCTCCGACCACATCCTAAGAGTGAGGTCTGGGTCTTTCACTTGCCCTAGCATATTACA…	>comp1953077_c0_seq1_Candidate Circumsporozoite protein AGTTTTTTTTTTTTTTTTACGGTACGTCATAATTTTATTCGGCAGACATTCAATCGGCTCATATTTTCCTTAGTGGTAGGCAGTCGTAATGATGACATTAGGCTGCGAGTCCAAGCCAACAGGGGAATATATACCCTCACTTATCATCCTCATATCCAATTATGGTAGACCCAAGGGCGGTCTCTGTTTACTACCTCAACACAACAGCATAGCGACACAGTAGATATAAAGGCATAACTGCAGTGGATGTATTAATAAGCAAATTTCAAAAGGAGCATATACAACACTACCAAATATGGTCATAACAGGATGCCCAAATATGGTCATAATGAGATGACAAGGC…
comp2274413_c0_seq1	5.1e-12	185	sp|Q8CJ61|CKLF4_MOUSE	CKLF-like MARVEL transmembrane domain-containing protein 4 OS=Mus musculus GN=Cmtm4 PE=1 SV=1	2.8e-11	178	sp|Q8IZR5|CKLF4_HUMAN	CKLF-like MARVEL transmembrane domain-containing protein 4 OS=Homo sapiens GN=CMTM4 PE=1 SV=1	2e-10	170	sp|Q1RMP9|CKLF8_BOVIN	CKLF-like MARVEL transmembrane domain-containing protein 8 OS=Bos taurus GN=CMTM8 PE=2 SV=1	+				+		GACTTTTTTTTTGTAAATTCGCATTTATTACACAATAGAACAGAAAAATACACCAAACAATAAGCTGTATCCAAACTCATAAGTTCAAAAAGTGAATTTTTCCACACCTGATAGTCAGAAGAAAACGATGATAATAGAAAATGCAAATGTACATACTTTTGATTACATTTGTTTAACAAATTGTTATAACAGGTATCAAGATACCTTCATTTCAGACTGCCCAGGGGCAATGTTTATGAATTAACTCTATATATTTTTTTTACTAGATACTCATAATATGTTACATAGGAAAGCACCCTATAGCTGCAACTAACAGTAAATCAATAATCTACACTAATTTATAACAATGCAACAAGATTTTAATTTTATAAACATTTCAATAAAATTTGAAGCAAAATA…	>comp2274413_c0_seq1 GACTTTTTTTTTGTAAATTCGCATTTATTACACAATAGAACAGAAAAATACACCAAACAATAAGCTGTATCCAAACTCATAAGTTCAAAAAGTGAATTTTTCCACACCTGATAGTCAGAAGAAAACGATGATAATAGAAAATGCAAATGTACATACTTTTGATTACATTTGTTTAACAAATTGTTATAACAGGTATCAAGATACCTTCATTTCAGACTGCCCAGGGGCAATGTTTATGAATTAACTCTATATATTTTTTTTACTAGATACTCATAATATGTTACATAGGAAAGCACCCTATAGCTGCAACTAACAGTAAATCAATAATCTACACTAATTTATAACAATGCAACAAGATTTTAATTTTATAAACATTTC…
comp2271895_c0_seq9	9.2e-140	1137	sp|O60641|AP180_HUMAN	Clathrin coat assembly protein AP180 OS=Homo sapiens GN=SNAP91 PE=1 SV=2	1.4e-137	1117	sp|Q61548|AP180_MOUSE	Clathrin coat assembly protein AP180 OS=Mus musculus GN=Snap91 PE=1 SV=1	2e-134	1118	sp|Q05140|AP180_RAT	Clathrin coat assembly protein AP180 OS=Rattus norvegicus GN=Snap91 PE=1 SV=1				+	+		TTGAGTATTCACGCCATCTTGGCCAAGGAGCACCCACCCCCTTTGACTTGAAGCTGGTCTGGTGAGGATACTAGGCTCCTTGGCTACTTTATTTCCATATTTTAGTCAGATGTAGTAGGAATCCTCAAAATGAATATGTCGGGACAAAGTGTTGCTGACCGCCTAACAGCGGCCAAGCACAGTATCGCCGGCCATGGGTTGGCCAAGTCGGTTTGCAAAGCCACGACCGAGGAAGTTATGGGACCCAAAAAGAAACATCTAGATTATTTGGTACTATGCACAAACGAACCAAATGTCTCCATTCCGCAATTGGCAAACTTGCTCATCGAGAGAACCCAATCTCAAAACTGGGTCATCGTTTTCAAATCCCTCATCACAGCTCACAATATTATGAATTTT…	>comp2271895_c0_seq9 TTGAGTATTCACGCCATCTTGGCCAAGGAGCACCCACCCCCTTTGACTTGAAGCTGGTCTGGTGAGGATACTAGGCTCCTTGGCTACTTTATTTCCATATTTTAGTCAGATGTAGTAGGAATCCTCAAAATGAATATGTCGGGACAAAGTGTTGCTGACCGCCTAACAGCGGCCAAGCACAGTATCGCCGGCCATGGGTTGGCCAAGTCGGTTTGCAAAGCCACGACCGAGGAAGTTATGGGACCCAAAAAGAAACATCTAGATTATTTGGTACTATGCACAAACGAACCAAATGTCTCCATTCCGCAATTGGCAAACTTGCTCATCGAGAGAACCCAATCTCAAAACTGGGTCATCGTTTTCAAATCCCTCATCACA…
comp2270148_c0_seq3	8.2e-20	249	sp|Q6C0Y0|COFI_YARLI	Cofilin OS=Yarrowia lipolytica (strain CLIB 122 / E 150) GN=COF1 PE=3 SV=1	3e-18	235	sp|P37167|ACTP_ACACA	Actophorin OS=Acanthamoeba castellanii PE=1 SV=2	6.4e-18	232	sp|Q96VU9|COFI_OGAPD	Cofilin OS=Ogataea parapolymorpha (strain ATCC 26012 / BCRC 20466 / JCM 22074 / NRRL Y-7560 / DL-1) GN=COF1 PE=2 SV=1			+		+		TAGTTAACAAACGAATGTCAGGTGGACGACACACCCTAAATCGGGCAAAGATTATCCAGCAATATACGTGTATAAGTATAAGTACCTAATAGAATCGTAGGGTAATTGGGACTTAAATATGTATTAAATATGTATAATATATGTATAACAATTCGGCAATGATACTTTAGGTTTATTTGACACTATTCTGGAATGCATAACTTATCAATAATTTCAATTGCATATCTAACATATAAATTAATAATCCATTCAGCGTTTAAACGATCAAGAAAATATCCATATTTTTGTATTTCCGAGGTAATCTTTTAAGTCTTTATAAAATTGGCAACGTTCATGATAATATTGATTGATCTGAAGCAGTACTTATCAATTTTATGAATTCTTTAACAAAATTATTGT…	>comp2270148_c0_seq3 TAGTTAACAAACGAATGTCAGGTGGACGACACACCCTAAATCGGGCAAAGATTATCCAGCAATATACGTGTATAAGTATAAGTACCTAATAGAATCGTAGGGTAATTGGGACTTAAATATGTATTAAATATGTATAATATATGTATAACAATTCGGCAATGATACTTTAGGTTTATTTGACACTATTCTGGAATGCATAACTTATCAATAATTTCAATTGCATATCTAACATATAAATTAATAATCCATTCAGCGTTTAAACGATCAAGAAAATATCCATATTTTTGTATTTCCGAGGTAATCTTTTAAGTCTTTATAAAATTGGCAACGTTCATGATAATATTGATTGATCTGAAGCAGTACTTATCAATTTTATGA…
comp2274262_c0_seq1	8.5e-136	995	sp|Q6P1N0|C2D1A_HUMAN	Coiled-coil and C2 domain-containing protein 1A OS=Homo sapiens GN=CC2D1A PE=1 SV=1	1.4e-133	995	sp|Q66HA5|C2D1A_RAT	Coiled-coil and C2 domain-containing protein 1A OS=Rattus norvegicus GN=Cc2d1a PE=1 SV=2	2.9e-133	985	sp|Q8K1A6|C2D1A_MOUSE	Coiled-coil and C2 domain-containing protein 1A OS=Mus musculus GN=Cc2d1a PE=1 SV=2	+		+		++		CAGAGAGGAAGTTTACTTGTTATGTCAAAATTTTGACAGCTCGACAAAAATTAATCATTAATCTGTGTTAGGTAGGATTGTCTAGTTGTCAAGATGTTTGGCAGGAAGAAAGAGGCACCCAAGGAGAGGAAGAAAGGTGGTGGAGCAGCTCTACTCAATCAGATGGGTATGAATCCAGACATGAATGCGATGGATGCCATGATCTATGGAGATGACGATGATGATGCTGAATTGGAAGCAGAACTTCTTGCCTTGCAGGGCGGCTCTTCCTCGGCCAAGCCGTCTCCTAAGAAAGGAGTGCAAGATATGGTTCAGCTGGACAGGATGATTGCTGCCAGCATGCGTGATTACCCTAGTGATGACGATGTCTCAGATACAGAGGACCCTGACTTGCTGGCT…	>comp2274262_c0_seq1 CAGAGAGGAAGTTTACTTGTTATGTCAAAATTTTGACAGCTCGACAAAAATTAATCATTAATCTGTGTTAGGTAGGATTGTCTAGTTGTCAAGATGTTTGGCAGGAAGAAAGAGGCACCCAAGGAGAGGAAGAAAGGTGGTGGAGCAGCTCTACTCAATCAGATGGGTATGAATCCAGACATGAATGCGATGGATGCCATGATCTATGGAGATGACGATGATGATGCTGAATTGGAAGCAGAACTTCTTGCCTTGCAGGGCGGCTCTTCCTCGGCCAAGCCGTCTCCTAAGAAAGGAGTGCAAGATATGGTTCAGCTGGACAGGATGATTGCTGCCAGCATGCGTGATTACCCTAGTGATGACGATGTCTCAGATACA…
comp1194290_c0_seq1	1.2e-28	339	sp|C0HJP7|CO1A1_TOXSP	Collagen alpha-1(I) chain (Fragments) OS=Toxodon sp. GN=COL1A1 PE=1 SV=1	1.1e-28	337	sp|C0HJP3|CO1A1_MYLDA	Collagen alpha-1(I) chain (Fragments) OS=Mylodon darwinii GN=COL1A1 PE=1 SV=1	9.5e-28	331	sp|P0C2W8|CO1A1_MAMAE	Collagen alpha-1(I) chain OS=Mammut americanum GN=COL1A1 PE=1 SV=4	+				+	Group_Collagen_alpha	GACCAGATGGTCCAGCAGGTCCAGTTTCTCCCCTTTGACCTTGTTCTCCACGTGTTCCTGGTGAACCGGCAGGTCCAGCAGGTCCAGGCTCACCACGGGATCCAGCAGGTCCAGCTTGACCTGGTGTTCCACCTTCACCACGTTCTCCACGAGGTCCAGGACTGCCAGGTGATCCAGATTCTCCACGTGGCCCAGCCTCTCCTCTTGTTCCGGGTTCACCACGCTGTCCTGGTGTTCCTCTTGGGCCGGCAGGACCAGCAGGTCCCGCTTGTCCAGGTGTTCCATCAGTTCCTGGTTCACCCCTTTCTCCACGAGGTCCTGCTGATCCAGGTGTTCCTGATTCTCCTCGAGGTCCAGCTTCACCTCTAGTTCCAGCTGGTCCTTGAGAACCTGCTTCAC…	>comp1194290_c0_seq1_Group_Collagen_alpha GACCAGATGGTCCAGCAGGTCCAGTTTCTCCCCTTTGACCTTGTTCTCCACGTGTTCCTGGTGAACCGGCAGGTCCAGCAGGTCCAGGCTCACCACGGGATCCAGCAGGTCCAGCTTGACCTGGTGTTCCACCTTCACCACGTTCTCCACGAGGTCCAGGACTGCCAGGTGATCCAGATTCTCCACGTGGCCCAGCCTCTCCTCTTGTTCCGGGTTCACCACGCTGTCCTGGTGTTCCTCTTGGGCCGGCAGGACCAGCAGGTCCCGCTTGTCCAGGTGTTCCATCAGTTCCTGGTTCACCCCTTTCTCCACGAGGTCCTGCTGATCCAGGTGTTCCTGATTCTCCTCGAGGTCCAG…
comp2271737_c1_seq2	6.4e-134	1321	sp|P11087|CO1A1_MOUSE	Collagen alpha-1(I) chain OS=Mus musculus GN=Col1a1 PE=1 SV=4	6.7e-139	1368	sp|C0HJN3|CO1A1_ORYAF	Collagen alpha-1(I) chain (Fragments) OS=Orycteropus afer GN=COL1A1 PE=1 SV=1	6.4e-134	1321	sp|Q9XSJ7|CO1A1_CANLF	Collagen alpha-1(I) chain OS=Canis lupus familiaris GN=COL1A1 PE=1 SV=1	+				+	Group_Collagen_alpha	GTCCAGACTCTCCAGCAGGTCCAGGTTCTCCAGCTTGACCACGAGGTCCAGATGGCCCGGATGGTCCAGGACGTCCAGCTTCCCCAGAAGGTCCGGCAGGTCCAGGTTCCCCTCTTTGACCAGGGGTGCCTGGTTCTCCACGCTGACCACGACTTCCTGGTTCTCCTCTTGGTCCAGGCTCTCCTGGGCCGCCAGCAGGACCAGCTGGTCCAGCTTGTCCAACCTGACCAGGAGGCCCTTGTTGTCCTCTAGCAGGAGCTCCAGGCTCTCCACGGGGTCCAGCAGGACCAGAAGGTCCAGAAGGACCAGCTTCACCACGTGGGCCGGGTGCACCAGTTCGTCCAGCAGGCCCTTGATTTCCAGGAGATCCAGACTCCCCACGAGGTCCTGCAGGACCTC…	>comp2271737_c1_seq2_Group_Collagen_alpha GTCCAGACTCTCCAGCAGGTCCAGGTTCTCCAGCTTGACCACGAGGTCCAGATGGCCCGGATGGTCCAGGACGTCCAGCTTCCCCAGAAGGTCCGGCAGGTCCAGGTTCCCCTCTTTGACCAGGGGTGCCTGGTTCTCCACGCTGACCACGACTTCCTGGTTCTCCTCTTGGTCCAGGCTCTCCTGGGCCGCCAGCAGGACCAGCTGGTCCAGCTTGTCCAACCTGACCAGGAGGCCCTTGTTGTCCTCTAGCAGGAGCTCCAGGCTCTCCACGGGGTCCAGCAGGACCAGAAGGTCCAGAAGGACCAGCTTCACCACGTGGGCCGGGTGCACCAGTTCGTCCAGCAGGCCCTTGAT…
comp2275893_c0_seq1	0	3228	sp|Q6P4Z2|CO2A1_XENTR	Collagen alpha-1(II) chain OS=Xenopus tropicalis GN=col2a1 PE=2 SV=1	0	3205	sp|P02458|CO2A1_HUMAN	Collagen alpha-1(II) chain OS=Homo sapiens GN=COL2A1 PE=1 SV=3	0	3184	sp|P02459|CO2A1_BOVIN	Collagen alpha-1(II) chain OS=Bos taurus GN=COL2A1 PE=1 SV=4	+				+	Group_Collagen_alpha	TACACGGCTCAGAACTGAGTGAGGTGTACATCTGGGAGGACCTATTTCTCCTAGTAGTAGCCTGCACAGTCAACAACAGATAGACAGACAGACCTTTTTGGTCACGTGACAGCCCTCAGTGACGTCACAAAGGAATGAGAAACAGCACTAGTGGACGGTCATCGTAGCGCTCAGTGCACACGCTGGCGCCTTCCGAAATGGAGGCCCGAAAATCCCTTATCGCCCTCGTCGTTCTCTTCGGAGTGAGTGTCCACACTCAGCCGTTACAAGAATGTTCGTATAATGGCGACACCTTCCAACATGGTGACACATGGAAACCCTATGGATTGAGAGACCCTTGCTTTGAATGTAAATGTTTAAATGGAGAATTCAGTTGTGAACAATTGCCGTGCCCGCAAA…	>comp2275893_c0_seq1_Group_Collagen_alpha TACACGGCTCAGAACTGAGTGAGGTGTACATCTGGGAGGACCTATTTCTCCTAGTAGTAGCCTGCACAGTCAACAACAGATAGACAGACAGACCTTTTTGGTCACGTGACAGCCCTCAGTGACGTCACAAAGGAATGAGAAACAGCACTAGTGGACGGTCATCGTAGCGCTCAGTGCACACGCTGGCGCCTTCCGAAATGGAGGCCCGAAAATCCCTTATCGCCCTCGTCGTTCTCTTCGGAGTGAGTGTCCACACTCAGCCGTTACAAGAATGTTCGTATAATGGCGACACCTTCCAACATGGTGACACATGGAAACCCTATGGATTGAGAGACCCTTGCTTTGAATGTAAATGTT…
comp2270519_c0_seq1	1.8e-236	2289	sp|P13941|CO3A1_RAT	Collagen alpha-1(III) chain OS=Rattus norvegicus GN=Col3a1 PE=2 SV=3	7.2e-233	2255	sp|P08121|CO3A1_MOUSE	Collagen alpha-1(III) chain OS=Mus musculus GN=Col3a1 PE=1 SV=4	9.2e-233	2254	sp|P04258|CO3A1_BOVIN	Collagen alpha-1(III) chain OS=Bos taurus GN=COL3A1 PE=1 SV=1			+		+	Group_Collagen_alpha	ATAAAGTTACCAACTGGTTTTACAGTGTATCAAACACATCATTTAAATGAGTGATATTTTTACCATTCCAGGAAAATAGTTTCACCAAGGAGAATCGTATCAAGAAGAATCGTTTGGAGTAGCCGCGCCCCCATCGCCACGAGATGGGGTGTCAGCTAGAGCTACTGGTAGGCCTCCTGGCTGTGTTTGTTGGATCTACACATTCCCAAGAATGTACGGATGGCCAAGCAGATATAGTGTTTGCCCTGGATAGCACTGCTAATGTGGACATAGAAGCATTCAAGTTCCTGGTGAATAAGGTGGCACAAGGATTCACCATCGGCCGAGACAGGACCATGCTGGGAGTAACAACCTTTTCAGACACGATCAATGATGTCATCCAACTGGGCACGTATGATA…	>comp2270519_c0_seq1_Group_Collagen_alpha ATAAAGTTACCAACTGGTTTTACAGTGTATCAAACACATCATTTAAATGAGTGATATTTTTACCATTCCAGGAAAATAGTTTCACCAAGGAGAATCGTATCAAGAAGAATCGTTTGGAGTAGCCGCGCCCCCATCGCCACGAGATGGGGTGTCAGCTAGAGCTACTGGTAGGCCTCCTGGCTGTGTTTGTTGGATCTACACATTCCCAAGAATGTACGGATGGCCAAGCAGATATAGTGTTTGCCCTGGATAGCACTGCTAATGTGGACATAGAAGCATTCAAGTTCCTGGTGAATAAGGTGGCACAAGGATTCACCATCGGCCGAGACAGGACCATGCTGGGAGTAACAACCTTTT…
comp2272437_c1_seq1	8.1e-81	851	sp|P20908|CO5A1_HUMAN	Collagen alpha-1(V) chain OS=Homo sapiens GN=COL5A1 PE=1 SV=3	1.2e-76	808	sp|P12105|CO3A1_CHICK	Collagen alpha-1(III) chain (Fragments) OS=Gallus gallus GN=COL3A1 PE=2 SV=2	5.4e-77	814	sp|P11087|CO1A1_MOUSE	Collagen alpha-1(I) chain OS=Mus musculus GN=Col1a1 PE=1 SV=4	+				+	Group_Collagen_alpha	TTTTTTTTTTTTTTTTTTTTTATTAATAAACATATTTATTTTCAGGCAAACATTTCCAATAGTAAACAAGCATTGCTGTCATGTACACAAACTATAAAAGTAACACCGTGCCAACTACGATTTGTTTTGTTAAAAAAGAAGCAATTTTTACATCAGTAGTCAATCAGACATTTTTTTTCATTTTTCTTTTTCTTATCAAACTATCCATTTAAACAATGTGTTTCTAGGTAAAAGTGAAACATCAATTGGAAAAATCTGCAGTCTCACATGATAAATCTCACATGTACGGCCCTGATAAAAAGGCTAAAAATCCCTCTCAAACCTGTAAAATTGCTAATATTGAAAGACTGCGTAGCCATAACGGAACAAAATGGATGTGCGTAACAGGCGCATGAAATG…	>comp2272437_c1_seq1_Group_Collagen_alpha TTTTTTTTTTTTTTTTTTTTTATTAATAAACATATTTATTTTCAGGCAAACATTTCCAATAGTAAACAAGCATTGCTGTCATGTACACAAACTATAAAAGTAACACCGTGCCAACTACGATTTGTTTTGTTAAAAAAGAAGCAATTTTTACATCAGTAGTCAATCAGACATTTTTTTTCATTTTTCTTTTTCTTATCAAACTATCCATTTAAACAATGTGTTTCTAGGTAAAAGTGAAACATCAATTGGAAAAATCTGCAGTCTCACATGATAAATCTCACATGTACGGCCCTGATAAAAAGGCTAAAAATCCCTCTCAAACCTGTAAAATTGCTAATATTGAAAGACTGCGTAGCC…
gnl_Pdu_trscr_assembly_1_200732	0	3200	sp|Q02388|CO7A1_HUMAN	Collagen alpha-1(VII) chain OS=Homo sapiens GN=COL7A1 PE=1 SV=2	0	3104	sp|Q63870|CO7A1_MOUSE	Collagen alpha-1(VII) chain OS=Mus musculus GN=Col7a1 PE=1 SV=3	2.1e-288	2779	sp|Q28247|CO4A5_CANLF	Collagen alpha-5(IV) chain OS=Canis lupus familiaris GN=COL4A5 PE=2 SV=2	+				+	Group_Collagen_alpha	CCAGCAGGTCCTGGTCCTCCACGCTCTCCAGCTTGTCCAGCAGGGCCAGCAGGTCCACGCTCTCCTGGGGCTCCAGATGGACCAGAAGGTCCTGCAGGTCCAGGTGCACCTTGTTCTCCAGGTCGACCTGCTGTTCCAGCTTGGCCTGGTTCTCCTCTTTGGCCTGCTTCACCAGCAGGACCTCGTGCGCCTTGCTCTCCAGGCTGACCAGAAGGACCTGCAGGTCCTCTTTGTCCCTGAGCTCCACGTTGGCCTGGGCTACCAGGTGTGCCTCTTTCTCCTTGTGCTCCTCGCTCTCCACCCAATCCTGCTGGTCCAGCAGGCCCTCTTTCTCCAGCTAAACCAGCAGGTCCACTGGGGCCTCGTTGTCCAGGTTCACCAGGTTGTCCTCGCTCTCCA…	>gnl_Pdu_trscr_assembly_1_200732_Group_Collagen_alpha CCAGCAGGTCCTGGTCCTCCACGCTCTCCAGCTTGTCCAGCAGGGCCAGCAGGTCCACGCTCTCCTGGGGCTCCAGATGGACCAGAAGGTCCTGCAGGTCCAGGTGCACCTTGTTCTCCAGGTCGACCTGCTGTTCCAGCTTGGCCTGGTTCTCCTCTTTGGCCTGCTTCACCAGCAGGACCTCGTGCGCCTTGCTCTCCAGGCTGACCAGAAGGACCTGCAGGTCCTCTTTGTCCCTGAGCTCCACGTTGGCCTGGGCTACCAGGTGTGCCTCTTTCTCCTTGTGCTCCTCGCTCTCCACCCAATCCTGCTGGTCCAGCAGGCCCTCTTTCTCCAGCTAAACCA…
comp2274137_c1_seq25	0	3154	sp|Q63870|CO7A1_MOUSE	Collagen alpha-1(VII) chain OS=Mus musculus GN=Col7a1 PE=1 SV=3	0	3137	sp|Q02388|CO7A1_HUMAN	Collagen alpha-1(VII) chain OS=Homo sapiens GN=COL7A1 PE=1 SV=2	1.4e-296	2856	sp|P27393|CO4A2_ASCSU	Collagen alpha-2(IV) chain OS=Ascaris suum PE=2 SV=1	+				+	Group_Collagen_alpha	AACTGGGGTTGCTGGTCAACCTGGATCAGGTGGACCCCGTGGTCCAGTTGGTCCCGCTGGATCACCGGGTGAAGCTGGAGAACCAGGAGAAAGAGGACCTGGAGGTTTGCCTGGTAGAGATGGCCCTGCTGGACCCAGAGGACCTAGAGGACCAATGGGACAAACAGGTGTTGGTGGACCAACAGGTCAGCCAGGTAACCGTGGACCCAGAGGCCCTGCCGGTCCTGCTGGACCAGGTGGTGAAACAGGTGGCCTTGGACCTTCTGGACTCCCTGGACCTCGTGGACCTGCTGGTCCTGCTGGTGAAATGGGAGAACCTGGAGTCACTGGTGCACTTGGACCTTTAGGTCCATCTGGACCTTCCGGGCCAAGAGGAGAAACTGGTGCCCCTGGTGAACC…	>comp2274137_c1_seq25_Group_Collagen_alpha AACTGGGGTTGCTGGTCAACCTGGATCAGGTGGACCCCGTGGTCCAGTTGGTCCCGCTGGATCACCGGGTGAAGCTGGAGAACCAGGAGAAAGAGGACCTGGAGGTTTGCCTGGTAGAGATGGCCCTGCTGGACCCAGAGGACCTAGAGGACCAATGGGACAAACAGGTGTTGGTGGACCAACAGGTCAGCCAGGTAACCGTGGACCCAGAGGCCCTGCCGGTCCTGCTGGACCAGGTGGTGAAACAGGTGGCCTTGGACCTTCTGGACTCCCTGGACCTCGTGGACCTGCTGGTCCTGCTGGTGAAATGGGAGAACCTGGAGTCACTGGTGCACTTGGACCTTTAGGTCCATCTG…
comp2278037_c0_seq3	1.6e-52	231	sp|P13944|COCA1_CHICK	Collagen alpha-1(XII) chain OS=Gallus gallus GN=COL12A1 PE=1 SV=3	6.3e-51	241	sp|Q60847|COCA1_MOUSE	Collagen alpha-1(XII) chain OS=Mus musculus GN=Col12a1 PE=2 SV=3	1.6e-39	330	sp|A2AX52|CO6A4_MOUSE	Collagen alpha-4(VI) chain OS=Mus musculus GN=Col6a4 PE=1 SV=2			+		+	Group_Collagen_alpha	ACCTGTTCATGGGGAAGCTGATGTATGCCCTTGAGCTGAAGGTCATTAGCCCAACCCTGGTCCCTTCACTGTGGATGTTCATTTCCTCTATAATGCTGACCACAAAGTTGAGAAGTTTCTGGAAGTTTTCTCTTCCCACACTTCCGGAGGAGTCCAGGGCAAAGACGAGGTCGGTTTTTGCATTGCAGCCTCTTTCGCAGTTCCGCCCTGAAAAACCATCTCGACATCGACAGAAGTAACTATGAGATAGGTCCACACACGATCCACCATTTTGGCAGGGGTTGCTGTCACACTGGTTGCCATCATCACAGAGCCTTGCCACAATCCTATCCACCATGTCATTTAGTCTTCCTAATTCTGGATTGAAAGGATCCACCACAGTGTCTGTGTCAGAGACGA…	>comp2278037_c0_seq3_Group_Collagen_alpha ACCTGTTCATGGGGAAGCTGATGTATGCCCTTGAGCTGAAGGTCATTAGCCCAACCCTGGTCCCTTCACTGTGGATGTTCATTTCCTCTATAATGCTGACCACAAAGTTGAGAAGTTTCTGGAAGTTTTCTCTTCCCACACTTCCGGAGGAGTCCAGGGCAAAGACGAGGTCGGTTTTTGCATTGCAGCCTCTTTCGCAGTTCCGCCCTGAAAAACCATCTCGACATCGACAGAAGTAACTATGAGATAGGTCCACACACGATCCACCATTTTGGCAGGGGTTGCTGTCACACTGGTTGCCATCATCACAGAGCCTTGCCACAATCCTATCCACCATGTCATTTAGTCTTCCTAATT…
comp2277317_c0_seq1	9.1e-46	298	sp|Q99715|COCA1_HUMAN	Collagen alpha-1(XII) chain OS=Homo sapiens GN=COL12A1 PE=1 SV=2	1.5e-19	302	sp|Q60847|COCA1_MOUSE	Collagen alpha-1(XII) chain OS=Mus musculus GN=Col12a1 PE=2 SV=3	2.8e-18	294	sp|P13944|COCA1_CHICK	Collagen alpha-1(XII) chain OS=Gallus gallus GN=COL12A1 PE=1 SV=3			+		+	Group_Collagen_alpha	TTTTTTTTTTTGTTTTTTTTTTCATGTTGTAGTCACTTTATTCAATATAAATATTTACAAAAACGTACAACAACTGGGAAGATGAAATGATGATGAAACCAACAAATGAGGAATGGATAATTTAAAAACATAATATTTAACAGAAATGTATATTAGTCGTTCGGCATGATATATTGATTAATCACGACAACTTTTGTTCTCCGTAATGCCTAGTTACATCTACGACCTCCATACAAACAAAACATCAGGGAAGATGAGGAGAAATATGAGATTCATTCAGTAATTATTTAATAACACACAAAACACATGTATCTGTTAATCTCTACATTAATACAAAATGGATGGATTAGCCTGTAATTGGAATGGCAAAAGTAGTACATTTGCAGTTGTAAGTTTTGT…	>comp2277317_c0_seq1_Group_Collagen_alpha TTTTTTTTTTTGTTTTTTTTTTCATGTTGTAGTCACTTTATTCAATATAAATATTTACAAAAACGTACAACAACTGGGAAGATGAAATGATGATGAAACCAACAAATGAGGAATGGATAATTTAAAAACATAATATTTAACAGAAATGTATATTAGTCGTTCGGCATGATATATTGATTAATCACGACAACTTTTGTTCTCCGTAATGCCTAGTTACATCTACGACCTCCATACAAACAAAACATCAGGGAAGATGAGGAGAAATATGAGATTCATTCAGTAATTATTTAATAACACACAAAACACATGTATCTGTTAATCTCTACATTAATACAAAATGGATGGATTAGCCTGTAA…
comp2276389_c1_seq15	1.5e-27	239	sp|Q80X19|COEA1_MOUSE	Collagen alpha-1(XIV) chain OS=Mus musculus GN=Col14a1 PE=1 SV=2	2.1e-27	254	sp|P32018|COEA1_CHICK	Collagen alpha-1(XIV) chain OS=Gallus gallus GN=COL14A1 PE=1 SV=2	5.6e-26	245	sp|Q05707|COEA1_HUMAN	Collagen alpha-1(XIV) chain OS=Homo sapiens GN=COL14A1 PE=1 SV=3		+			+	Group_Collagen_alpha	CATGGTTGGTGTGTTCTCTCAAAAGCTCATACACTTTGTTGCCAACATTCAGTTGGGCACGGACAATATCAGCTGGATCAACAAATACAGAGAATGTGAAAACGTAGATTCCTGTTTGACTGCACCTGTAGGAATTTGTGTTTGAATCCCAATCCCTCGGTGAATTTAGAACTATACTTTGGAATCTGATTCGGCCAAAATTACTGAAAATACCACTTGGTTGGTACACATAGAAATATCGTGGATTGGACATGCTGTCGGTTATGCTGAAAGCAGACATGGAGGTCAGTTTAAAGGCATCACTGTACAGGTTGCCTCCGGAACGAATATTTATATTTCCTTGATTGAGTCTCAATATTGCATCTCGAGAAATAGTGTCAATTCCTGTACCAGCTGTAT…	>comp2276389_c1_seq15_Group_Collagen_alpha CATGGTTGGTGTGTTCTCTCAAAAGCTCATACACTTTGTTGCCAACATTCAGTTGGGCACGGACAATATCAGCTGGATCAACAAATACAGAGAATGTGAAAACGTAGATTCCTGTTTGACTGCACCTGTAGGAATTTGTGTTTGAATCCCAATCCCTCGGTGAATTTAGAACTATACTTTGGAATCTGATTCGGCCAAAATTACTGAAAATACCACTTGGTTGGTACACATAGAAATATCGTGGATTGGACATGCTGTCGGTTATGCTGAAAGCAGACATGGAGGTCAGTTTAAAGGCATCACTGTACAGGTTGCCTCCGGAACGAATATTTATATTTCCTTGATTGAGTCTCAAT…
comp2273865_c0_seq2	8.9e-52	403	sp|A2AX52|CO6A4_MOUSE	Collagen alpha-4(VI) chain OS=Mus musculus GN=Col6a4 PE=1 SV=2	3.9e-38	299	sp|Q99715|COCA1_HUMAN	Collagen alpha-1(XII) chain OS=Homo sapiens GN=COL12A1 PE=1 SV=2	1.2e-66	402	sp|A6NMZ7|CO6A6_HUMAN	Collagen alpha-6(VI) chain OS=Homo sapiens GN=COL6A6 PE=1 SV=2		+			+	Group_Collagen_alpha	GGCTTTTTTTTTCTTTCTCTTTAGTACAGTTTTATTTTTTGTATTTTTTCTTAAAATTCACATGTATAACGATATATATAAGGACATGGCAACTTTGAAAACGCAATAAATAAAGTAACAGTTTTTACAGCACATATTAACCTTCATTTTAAAACGGCTGACCACATAAATGTATTATATAATAATGGAAGCAAAAATAAACCAAAAAGTTACTTTTCCTCAAACTTATAAATAAATCCTGTATTACTGCAAACCTTGCAAAGTGTACCTAGTTACTGTGAGATCACTAGATTTAAGACCAGGTTAAATTTAGAAGCAGGTGTGATGAAAATGATTAATTATGTAAAGGACTTCTTTGTCCTAATGAAGGTCAAGGCCGATTGATCACATCACGCACAA…	>comp2273865_c0_seq2_Group_Collagen_alpha GGCTTTTTTTTTCTTTCTCTTTAGTACAGTTTTATTTTTTGTATTTTTTCTTAAAATTCACATGTATAACGATATATATAAGGACATGGCAACTTTGAAAACGCAATAAATAAAGTAACAGTTTTTACAGCACATATTAACCTTCATTTTAAAACGGCTGACCACATAAATGTATTATATAATAATGGAAGCAAAAATAAACCAAAAAGTTACTTTTCCTCAAACTTATAAATAAATCCTGTATTACTGCAAACCTTGCAAAGTGTACCTAGTTACTGTGAGATCACTAGATTTAAGACCAGGTTAAATTTAGAAGCAGGTGTGATGAAAATGATTAATTATGTAAAGGACTTCTTT…
comp2274517_c0_seq1	3.7e-74	413	sp|A2AX52|CO6A4_MOUSE	Collagen alpha-4(VI) chain OS=Mus musculus GN=Col6a4 PE=1 SV=2	6.3e-71	310	sp|Q99715|COCA1_HUMAN	Collagen alpha-1(XII) chain OS=Homo sapiens GN=COL12A1 PE=1 SV=2	2.5e-29	350	sp|A6NMZ7|CO6A6_HUMAN	Collagen alpha-6(VI) chain OS=Homo sapiens GN=COL6A6 PE=1 SV=2				+	+	Group_Collagen_alpha	GGGAACAATAGATGTACAGACATGGGGTTGCTGTGCCTCAATCTATGGAGCATGTGCATGTGCATTGCATGGCTGTGGATGTGCATTGCATGGCTGTGCATTGCCTCTGATTGCGGAGCAGTGGGTACGTGCAGTGGACATGGGGAATGGGTCGGAGAAGTGGGAGGGTGGCTCTGCTGACTGCTGGGTGGTGTGTGGCAAGTCAAGTGTGCAATGAAGCCGGGCGAGAAGGAGTGCAGGGGCAGAGAGGGAGAGCAGAGCAAGAAGCAGAGCAAGAAGCAGAGCCAGGCTAAAGCCAACCAGAGCCCCACTCAATAACAGTGGCCTAGCAGTAGTGGACAGGCAGTCAGTGCCATTACCTGCCCTCGGTCTACCAGTCGCCACAGAACACAGCCTCCA…	>comp2274517_c0_seq1_Group_Collagen_alpha GGGAACAATAGATGTACAGACATGGGGTTGCTGTGCCTCAATCTATGGAGCATGTGCATGTGCATTGCATGGCTGTGGATGTGCATTGCATGGCTGTGCATTGCCTCTGATTGCGGAGCAGTGGGTACGTGCAGTGGACATGGGGAATGGGTCGGAGAAGTGGGAGGGTGGCTCTGCTGACTGCTGGGTGGTGTGTGGCAAGTCAAGTGTGCAATGAAGCCGGGCGAGAAGGAGTGCAGGGGCAGAGAGGGAGAGCAGAGCAAGAAGCAGAGCAAGAAGCAGAGCCAGGCTAAAGCCAACCAGAGCCCCACTCAATAACAGTGGCCTAGCAGTAGTGGACAGGCAGTCAGTGCCATT…
comp2261362_c0_seq2	1.9e-12	206	sp|P29400|CO4A5_HUMAN	Collagen alpha-5(IV) chain OS=Homo sapiens GN=COL4A5 PE=1 SV=2	1.8e-11	192	sp|A8XV37|CO145_CAEBR	Putative cuticle collagen 145 OS=Caenorhabditis briggsae GN=col-145 PE=3 SV=2	1.7e-05	139	sp|Q9UEW3|MARCO_HUMAN	Macrophage receptor MARCO OS=Homo sapiens GN=MARCO PE=1 SV=1		+			+	Group_Collagen_alpha	AACGGTTTTCATTTTTGAGTTGTTTACTTCTTTATTAGACTGGTTATTAATTAATGTAATATGCAGAGACAGTTACATCAGTGTCTGAGAATGCTTTGTTGAAGAGTGACCCCAGGAATCCTCCATCGCGCGACTTGACCCGAAGGTCAACTCTGTCTCCCTGATCCATCGTCAAGGCAACGCGGTTGACTCCAACTGGGAAGGAGGTTTTACTGTCTCTGTTTCCTAAAGTGGAAAGCACTTCGATGCCCTTGTACACGAGGACTATTGGGACAGCGCTGTTGCCGTTAGCCACTGCCACAAGGCTGAAGAAGTACGTTCCACTCTTTGGCACGTTGAAGCTGGAAGCGGCCTGATTATAGAATGAACCATAATCAACGAGCACCGTATCCACTTTCA…	>comp2261362_c0_seq2_Group_Collagen_alpha AACGGTTTTCATTTTTGAGTTGTTTACTTCTTTATTAGACTGGTTATTAATTAATGTAATATGCAGAGACAGTTACATCAGTGTCTGAGAATGCTTTGTTGAAGAGTGACCCCAGGAATCCTCCATCGCGCGACTTGACCCGAAGGTCAACTCTGTCTCCCTGATCCATCGTCAAGGCAACGCGGTTGACTCCAACTGGGAAGGAGGTTTTACTGTCTCTGTTTCCTAAAGTGGAAAGCACTTCGATGCCCTTGTACACGAGGACTATTGGGACAGCGCTGTTGCCGTTAGCCACTGCCACAAGGCTGAAGAAGTACGTTCCACTCTTTGGCACGTTGAAGCTGGAAGCGGCCTGAT…
comp2275457_c1_seq8	3.7e-39	376	sp|A6NMZ7|CO6A6_HUMAN	Collagen alpha-6(VI) chain OS=Homo sapiens GN=COL6A6 PE=1 SV=2	1.3e-53	508	sp|A2AX52|CO6A4_MOUSE	Collagen alpha-4(VI) chain OS=Mus musculus GN=Col6a4 PE=1 SV=2	2.1e-50	299	sp|A8TX70|CO6A5_HUMAN	Collagen alpha-5(VI) chain OS=Homo sapiens GN=COL6A5 PE=1 SV=1				+	+	Group_Collagen_alpha	GGGGTAGGACGGGGAGTAGGAGCTGGTGGAGGAACCTGGATCTGACACACCAGGGAGATGATGGGATTGACGAGGTTGTTCAAGGAGCGGTAGTCGTTGGTTGTGAAGACGCTTGATGGCTGCCCAGCGATACGCAGCAGGGTGTTGGAATTCACGGGCCCCACTCCGATAGCCACGACTCTGATGAGTTGGTTCCTCAGATCATCGGCTGCCCGTATCTCATTTCCTGAGTTGACATTACTATCTCCACCGACCAATAAGACGACAGTTCTTGAGACCGAATCTCTCGGATCTAGACGGTAAACATCTCTTGATCTGACTAAACCGTCTCCGACATTTGAGCCTCGTCCAATGTAAGGCATGGTGCGGAGGACTCCGATAAAGTTGGTCACATCCCTA…	>comp2275457_c1_seq8_Group_Collagen_alpha GGGGTAGGACGGGGAGTAGGAGCTGGTGGAGGAACCTGGATCTGACACACCAGGGAGATGATGGGATTGACGAGGTTGTTCAAGGAGCGGTAGTCGTTGGTTGTGAAGACGCTTGATGGCTGCCCAGCGATACGCAGCAGGGTGTTGGAATTCACGGGCCCCACTCCGATAGCCACGACTCTGATGAGTTGGTTCCTCAGATCATCGGCTGCCCGTATCTCATTTCCTGAGTTGACATTACTATCTCCACCGACCAATAAGACGACAGTTCTTGAGACCGAATCTCTCGGATCTAGACGGTAAACATCTCTTGATCTGACTAAACCGTCTCCGACATTTGAGCCTCGTCCAATGTAA…
comp2264121_c0_seq1	3.5e-34	386	sp|Q3T0B6|C1QBP_BOVIN	Complement component 1 Q subcomponent-binding protein, mitochondrial OS=Bos taurus GN=C1QBP PE=2 SV=1	3.2e-31	359	sp|Q9MZE0|C1QBP_CHLAE	Complement component 1 Q subcomponent-binding protein, mitochondrial OS=Chlorocebus aethiops GN=C1QBP PE=1 SV=2	8.8e-31	355	sp|Q07021|C1QBP_HUMAN	Complement component 1 Q subcomponent-binding protein, mitochondrial OS=Homo sapiens GN=C1QBP PE=1 SV=1			+		+		GCATTTTTTTTTTCCAAAAATATCAAATTTATTTTTCACTAATTTTTCATCAAACATTTTTGCAAATTTAGAATAACAGCAATAGATTATTCCGCGCAATCCTTCTGTAGATTATATCACCAAATATAAGTTCAAATTTTGTCTGTCATAAATGCCTCTTGTAAAACAACACAAGTAAGATCTCTATACATCACTGCAATGTGACTGTTAGGCAATAATAAATTGCCAGTGCTCTCTTCACTAGAATATACACAAAGGTATTTCAATTAATTCAGTTCTAGGTGATTATCCATTTGTCTAGGCGGTTGTTGACTTCCCTGCCAAAGCTTGCAATTCCCGTTCGTTCTGCACATGGGCTGTGTCTAGTGATTTGGATTTTCTGTACCACAATATACTGAA…	>comp2264121_c0_seq1 GCATTTTTTTTTTCCAAAAATATCAAATTTATTTTTCACTAATTTTTCATCAAACATTTTTGCAAATTTAGAATAACAGCAATAGATTATTCCGCGCAATCCTTCTGTAGATTATATCACCAAATATAAGTTCAAATTTTGTCTGTCATAAATGCCTCTTGTAAAACAACACAAGTAAGATCTCTATACATCACTGCAATGTGACTGTTAGGCAATAATAAATTGCCAGTGCTCTCTTCACTAGAATATACACAAAGGTATTTCAATTAATTCAGTTCTAGGTGATTATCCATTTGTCTAGGCGGTTGTTGACTTCCCTGCCAAAGCTTGCAATTCCCGTTCGTTCTGCACATGGGCTGTGTCTAGTGATTTGGATTT…
comp2267169_c0_seq1	1.6e-148	1459	sp|P00565|KCRM_CHICK	Creatine kinase M-type OS=Gallus gallus GN=CKM PE=2 SV=1	3.4e-148	1456	sp|P05122|KCRB_CHICK	Creatine kinase B-type OS=Gallus gallus GN=CKB PE=1 SV=1	2.4e-147	1448	sp|Q04447|KCRB_MOUSE	Creatine kinase B-type OS=Mus musculus GN=Ckb PE=1 SV=1		+			+		TAGACCACGCCCCTTCTAGGAAACGCACCAATCAGCGCCCAGCATTAGCCCCGTCCTCAGCGACCGAGCAGAGAGAGAAATTTGGATCATTTGCTGCTCTGGCGGGAAGGCAACAGGGTCTTTAGGTCTTCTCTCAGTCTCCACACTCCCTCAGTCTCCTCGACATTTCCTGGGCTCCTCAATTAAACCTCCAAGATGAACAAGAGACAAGGTCAATACCCCGCGGAGGAGGATTTCCCCGAACTGAGCAAGCACAACAACTGGATGGCCAAGGTGCTCACCAAGGAGATGTACGCCAAGTACAGGGAGGTGATGACCCCATCTGGGTTTACCTTCGACAGGGCCATTCAGACTGGCGTCGACAACCCAGGCCATCCCTTCATCTTCACTGTCGGCTGC…	>comp2267169_c0_seq1 TAGACCACGCCCCTTCTAGGAAACGCACCAATCAGCGCCCAGCATTAGCCCCGTCCTCAGCGACCGAGCAGAGAGAGAAATTTGGATCATTTGCTGCTCTGGCGGGAAGGCAACAGGGTCTTTAGGTCTTCTCTCAGTCTCCACACTCCCTCAGTCTCCTCGACATTTCCTGGGCTCCTCAATTAAACCTCCAAGATGAACAAGAGACAAGGTCAATACCCCGCGGAGGAGGATTTCCCCGAACTGAGCAAGCACAACAACTGGATGGCCAAGGTGCTCACCAAGGAGATGTACGCCAAGTACAGGGAGGTGATGACCCCATCTGGGTTTACCTTCGACAGGGCCATTCAGACTGGCGTCGACAACCCAGGCCATCCC…
comp2261317_c0_seq1	8.2e-83	839	sp|P23004|QCR2_BOVIN	Cytochrome b-c1 complex subunit 2, mitochondrial OS=Bos taurus GN=UQCRC2 PE=1 SV=2	1.2e-79	809	sp|P22695|QCR2_HUMAN	Cytochrome b-c1 complex subunit 2, mitochondrial OS=Homo sapiens GN=UQCRC2 PE=1 SV=3	2.7e-77	787	sp|P32551|QCR2_RAT	Cytochrome b-c1 complex subunit 2, mitochondrial OS=Rattus norvegicus GN=Uqcrc2 PE=1 SV=2		+			+	Group_cytochromes	AAAATTTTTCCTTTGTACATTAATTTATTTCAGTTAAATAACAGGGTTTCTTTCACATTCGCAAATATCATTCAATCTCCTATGCGATGATGTTATGATTTTTTTTCATAATAATCCATACTATGCTCTCAAGAGGTAATCACTCAATGTCTTTGTTTAAACCGGTGTCCATTTGAGATTTCTGCAGTAATTTAAATAAGCTGGTCCAAATATGGTGTGTTGGCCAGGTTTCCGACGGCAGCCATGCTTGGTTTGCCGTTGATGACTTTCTTGGCAACATTGGTCACATCAGCAGCGGTGATGGCATCGATGGACTTGACCACTTCGGCTGGAGGCAGCACCTGACCGGACAGGCTGACCTGGCTGGTGATGTCCACAAGTTCCTGGTCTCCGCTTTCC…	>comp2261317_c0_seq1_Group_cytochromes AAAATTTTTCCTTTGTACATTAATTTATTTCAGTTAAATAACAGGGTTTCTTTCACATTCGCAAATATCATTCAATCTCCTATGCGATGATGTTATGATTTTTTTTCATAATAATCCATACTATGCTCTCAAGAGGTAATCACTCAATGTCTTTGTTTAAACCGGTGTCCATTTGAGATTTCTGCAGTAATTTAAATAAGCTGGTCCAAATATGGTGTGTTGGCCAGGTTTCCGACGGCAGCCATGCTTGGTTTGCCGTTGATGACTTTCTTGGCAACATTGGTCACATCAGCAGCGGTGATGGCATCGATGGACTTGACCACTTCGGCTGGAGGCAGCACCTGACCGGACAGGCTGACC…
comp2254418_c0_seq1	5.3e-24	284	sp|P00129|QCR7_BOVIN	Cytochrome b-c1 complex subunit 7 OS=Bos taurus GN=UQCRB PE=1 SV=3	1.8e-23	279	sp|Q5RC24|QCR7_PONAB	Cytochrome b-c1 complex subunit 7 OS=Pongo abelii GN=UQCRB PE=3 SV=3	3.8e-23	276	sp|P14927|QCR7_HUMAN	Cytochrome b-c1 complex subunit 7 OS=Homo sapiens GN=UQCRB PE=1 SV=2			+		+	Group_cytochromes	AAATTTTTTCATACTTAAACAAAACATTTTTATTGTACAAGCATGTCAAGATCAATTCAGTTGGAATCCAATCCTTGAACCCGATTCAATAATTTATTACATTCTATAGACATTTTGTTAAAATATTAAAATCCGGTTTTCTTTTCACTTGGTGTCCCACTCGCTCTTTTCTTTCATTTCCATCTGAACCCTGTCAACATATGGCTGCAAGTACCGTACGTCATTATCGTATTGCGTCCATTCTTCCTTTGGTAAAATTATTTTCTTGTTGGATAAGTTGATTGCTCTTGTGATACGAAAGATGCGCTGGTCATAAACGTCTTTTGGCAGTCTTCTGATCGCTTCTTCTACTTCTGGAGTTTCGTAAATCACGTCATCTCTCATCAATCCGAGTTGAGG…	>comp2254418_c0_seq1_Group_cytochromes AAATTTTTTCATACTTAAACAAAACATTTTTATTGTACAAGCATGTCAAGATCAATTCAGTTGGAATCCAATCCTTGAACCCGATTCAATAATTTATTACATTCTATAGACATTTTGTTAAAATATTAAAATCCGGTTTTCTTTTCACTTGGTGTCCCACTCGCTCTTTTCTTTCATTTCCATCTGAACCCTGTCAACATATGGCTGCAAGTACCGTACGTCATTATCGTATTGCGTCCATTCTTCCTTTGGTAAAATTATTTTCTTGTTGGATAAGTTGATTGCTCTTGTGATACGAAAGATGCGCTGGTCATAAACGTCTTTTGGCAGTCTTCTGATCGCTTCTTCTACTTCTGGAGT…
comp2262720_c0_seq1	2.2e-28	328	sp|Q9V4N3|CYB5_DROME	Cytochrome b5 OS=Drosophila melanogaster GN=Cyt-b5 PE=2 SV=1	1.1e-27	322	sp|P00173|CYB5_RAT	Cytochrome b5 OS=Rattus norvegicus GN=Cyb5a PE=1 SV=2	2.3e-27	319	sp|P56395|CYB5_MOUSE	Cytochrome b5 OS=Mus musculus GN=Cyb5a PE=1 SV=2		+			+	Group_cytochromes	CTTTTTTTCACTAATTCCAACTTTATTTGCCAGCGCATTCAACACTGGCAGCTTTACAAATATATAATATAGTAACACTACTATTTAATCACAGTATATTATTACATACTAAAGATATGCTTTTACTTGGAAACATGTTAAAAGTACACAACAGAAGTATGTTAGTCCATTGCTCTTAAAATTAAACAGTAATGATTACTAGTCAAGAACGCTTTGTGTATAGTTCAAGATTTTTCATGCAACACAAAAATAACCACATTAGTGACAAAGTTATTTGTTAGTATTAGCCACATTGCTTTATACAACAGATTATAATATTTTTGGAATGCAAAAAATTATAAAAGAAAATGGTGCAAATGAGGTTGTTTTCGGAGATTGTAACTATTTTTCCAGTAAAAC…	>comp2262720_c0_seq1_Group_cytochromes CTTTTTTTCACTAATTCCAACTTTATTTGCCAGCGCATTCAACACTGGCAGCTTTACAAATATATAATATAGTAACACTACTATTTAATCACAGTATATTATTACATACTAAAGATATGCTTTTACTTGGAAACATGTTAAAAGTACACAACAGAAGTATGTTAGTCCATTGCTCTTAAAATTAAACAGTAATGATTACTAGTCAAGAACGCTTTGTGTATAGTTCAAGATTTTTCATGCAACACAAAAATAACCACATTAGTGACAAAGTTATTTGTTAGTATTAGCCACATTGCTTTATACAACAGATTATAATATTTTTGGAATGCAAAAAATTATAAAAGAAAATGGTGCAAATGA…
comp2224014_c0_seq1	2.7e-52	551	sp|Q6QLW4|CYC_PECGU	Cytochrome c OS=Pectinaria gouldii PE=3 SV=1	6.2e-46	491	sp|P00040|CYC_SCHGR	Cytochrome c OS=Schistocerca gregaria PE=1 SV=2	1.2e-44	479	sp|P00018|CYC_DRONO	Cytochrome c OS=Dromaius novaehollandiae GN=CYC PE=1 SV=2			+		+	Group_cytochromes	CTTTTTTTTTCTCATAAATAAAAACCTTTAATTTACAGTTTAAACGAAATATTCTAAAAACTTAAAACTGAAGGTATCACTGGTTGTCACGTAATTTTAAAGATGTATACACGATCTCCCAATATCATAAACGTTTGGCAATACATTAGGCAGTCTTTTAATATCTACTGTAACGAAAGAGAAAGAAGACTCAGAAGTCAAAACTATAATGAAACTCGGACAGAAGGAGCGTCAGGATAGCTGTATAAGCCTGTATTGCAACAATGTTAAATAATGAATATGGGATGTAAAATTATCCTAGGCGTACAATGTACATGAAATGGTCTTTGATTGACGTGTATAAATATCAACAACGACTATCCTCTAACTGCCAATTTGAAATGTTTCTAGATGAATTTG…	>comp2224014_c0_seq1_Group_cytochromes CTTTTTTTTTCTCATAAATAAAAACCTTTAATTTACAGTTTAAACGAAATATTCTAAAAACTTAAAACTGAAGGTATCACTGGTTGTCACGTAATTTTAAAGATGTATACACGATCTCCCAATATCATAAACGTTTGGCAATACATTAGGCAGTCTTTTAATATCTACTGTAACGAAAGAGAAAGAAGACTCAGAAGTCAAAACTATAATGAAACTCGGACAGAAGGAGCGTCAGGATAGCTGTATAAGCCTGTATTGCAACAATGTTAAATAATGAATATGGGATGTAAAATTATCCTAGGCGTACAATGTACATGAAATGGTCTTTGATTGACGTGTATAAATATCAACAACGACTAT…
gnl_Pdu_trscr_assembly_1_15577	4e-35	389	sp|P80971|COX42_THUOB	Cytochrome c oxidase subunit 4 isoform 2, mitochondrial OS=Thunnus obesus PE=1 SV=2	2e-31	354	sp|O46578|COX41_GORGO	Cytochrome c oxidase subunit 4 isoform 1, mitochondrial (Fragment) OS=Gorilla gorilla gorilla GN=COX4I1 PE=3 SV=1	3.3e-31	352	sp|Q9I8U0|COX41_THUOB	Cytochrome c oxidase subunit 4 isoform 1, mitochondrial OS=Thunnus obesus PE=2 SV=1			+		+	Group_cytochromes	GGTCCGGAATTCCCGGGATCGAAGGGTGTCATCATGTCGAACCAACTATTGCGGGTGGTTGCCCGTCGGGCCGTGCCAATTGCCCAGCGCTCTCTTTCCACCTCAACATCTCTCAACTCCATTGACACAGCCCTGTCTCAGGCACAAAAAGACAAATACTACCCCAAAGTCGGAAACCGAGACATCGTAGGCTTCGGAGTGAACGGCAACCCTGCTTATGCGGACAGAGAGGACTACCCGGCCCCAGCCATTAGGTTCATGGAAAACACTCCAGAAATTTTAGCCCTCAGGGAAAAGGAGAAGGGAGACTGGAAGAACCTGACCATGGACGAGAAGAAAGCCCTCTACAGAGCAAGCTTCTGCCAAACGTACGCCGAAATGAAGGCCCCAACGGGAGAG…	>gnl_Pdu_trscr_assembly_1_15577_Group_cytochromes GGTCCGGAATTCCCGGGATCGAAGGGTGTCATCATGTCGAACCAACTATTGCGGGTGGTTGCCCGTCGGGCCGTGCCAATTGCCCAGCGCTCTCTTTCCACCTCAACATCTCTCAACTCCATTGACACAGCCCTGTCTCAGGCACAAAAAGACAAATACTACCCCAAAGTCGGAAACCGAGACATCGTAGGCTTCGGAGTGAACGGCAACCCTGCTTATGCGGACAGAGAGGACTACCCGGCCCCAGCCATTAGGTTCATGGAAAACACTCCAGAAATTTTAGCCCTCAGGGAAAAGGAGAAGGGAGACTGGAAGAACCTGACCATGGACGAGAAGAAAGCCCTCTACA…
comp2259823_c0_seq1	7.7e-07	82	sp|Q3T061|COX7R_BOVIN	Cytochrome c oxidase subunit 7A-related protein, mitochondrial OS=Bos taurus GN=COX7A2L PE=3 SV=1	0.0018	70	sp|Q61387|COX7R_MOUSE	Cytochrome c oxidase subunit 7A-related protein, mitochondrial OS=Mus musculus GN=Cox7a2l PE=1 SV=1	0.0051	92	sp|O14548|COX7R_HUMAN	Cytochrome c oxidase subunit 7A-related protein, mitochondrial OS=Homo sapiens GN=COX7A2L PE=1 SV=2		+			+	Group_cytochromes	TTATTTGAATGATGTAAAATAAATATCAACAACTTTTATTCATGAACGAAAACCTTGTATCCTCACTTCAAGGCAAATAAATCTTCTTTCAGTCATCTCTCAAGTCAGTAACAATAATTCCGAGATTAGGCTACTCTTCATCTTAAAATCATATTCTCATAATTTCAGTTCGTTCTGATAAAATGTTTCAAGACTTTTTTCTTTCATTTCAAATTCCCCCCATTTTGACAAGTCGTCCCTAACCAGTGTCTACATGGTCTATGAATACGGCCAGCATGTCACTTGTTTGATAATTTAACATAAATAATCTATTAAAATGATAACATTTTCTAATCATTCTTGGGTGGGAAAGACATCTTAACAATTAGACTGAGACAATAAACTGTTGCTAGAGTCATG…	>comp2259823_c0_seq1_Group_cytochromes TTATTTGAATGATGTAAAATAAATATCAACAACTTTTATTCATGAACGAAAACCTTGTATCCTCACTTCAAGGCAAATAAATCTTCTTTCAGTCATCTCTCAAGTCAGTAACAATAATTCCGAGATTAGGCTACTCTTCATCTTAAAATCATATTCTCATAATTTCAGTTCGTTCTGATAAAATGTTTCAAGACTTTTTTCTTTCATTTCAAATTCCCCCCATTTTGACAAGTCGTCCCTAACCAGTGTCTACATGGTCTATGAATACGGCCAGCATGTCACTTGTTTGATAATTTAACATAAATAATCTATTAAAATGATAACATTTTCTAATCATTCTTGGGTGGGAAAGACATCTTA…
comp2275714_c2_seq1	0.84	89	sp|Q2JIS8|CY550_SYNJB	Cytochrome c-550 OS=Synechococcus sp. (strain JA-2-3B'a(2-13)) GN=psbV PE=3 SV=1	0.97	70	sp|P55947|MTCU_HELPO	Copper-metallothionein OS=Helix pomatia PE=1 SV=1	0.9998	77	sp|P16242|ANTA_HAEGH	Ghilanten OS=Haementeria ghilianii PE=1 SV=2		+			+	Group_cytochromes	TATATATATATATATATATATTATATACTTATCAGTAAAAGAAAGTCATAAAAACATGAAGTGTTCAAGGGGAATTCGATAACTTTCTTTTGCTGTTCATTACATGTATATATTGTTGTCTTTTCTTTTTTTCAAGCAACCTTCAGGCTAATATATCATGAGCAGTAGTATGAAATGGATTTCTGAAGAAACAAGCAAAGAAAGTACAGATTTCTACACAGTCTGCATTGCTAATACTGTTATTAGATTGCTTAGCAAAATTAAAAGTGCAAAATGCCTTCAATTAATTAATTAGTAATAATAGCTCCGTTTTCAGTTGGCAACAAGATAACACACATGTTTCTGAATAGAAATAATAATTATACAAAAATTTTATCTTTTTGACGTAAAATCTGATAA…	>comp2275714_c2_seq1_Group_cytochromes TATATATATATATATATATATTATATACTTATCAGTAAAAGAAAGTCATAAAAACATGAAGTGTTCAAGGGGAATTCGATAACTTTCTTTTGCTGTTCATTACATGTATATATTGTTGTCTTTTCTTTTTTTCAAGCAACCTTCAGGCTAATATATCATGAGCAGTAGTATGAAATGGATTTCTGAAGAAACAAGCAAAGAAAGTACAGATTTCTACACAGTCTGCATTGCTAATACTGTTATTAGATTGCTTAGCAAAATTAAAAGTGCAAAATGCCTTCAATTAATTAATTAGTAATAATAGCTCCGTTTTCAGTTGGCAACAAGATAACACACATGTTTCTGAATAGAAATAATAAT…
comp2272293_c0_seq1	2.1e-132	1307	sp|P00727|AMPL_BOVIN	Cytosol aminopeptidase OS=Bos taurus GN=LAP3 PE=1 SV=3	2.8e-130	1287	sp|Q9CPY7|AMPL_MOUSE	Cytosol aminopeptidase OS=Mus musculus GN=Lap3 PE=1 SV=3	2.8e-130	1287	sp|Q68FS4|AMPL_RAT	Cytosol aminopeptidase OS=Rattus norvegicus GN=Lap3 PE=1 SV=1		+			+		GATTCTTTTAGCAGCTTATAATTAATATTTATTATAGATCACTTACTACAACGAGTACACATGACACGTACACTCCACACTACATCATTTATTCTTCGGCAAAATGCTCTAATCCTCAAATTCACACTATGACGATTTGCTCAGCAGATTCAAGAATTCCACAACTGTTCTTGTTGGTCGACCACTCATTCCCTTGGGCAAGTACGGAATTTCGGATTTGGCGATCATCACCCCAGCTGTGTCAATGTGCATCCATTTCTCATGGGTCACAAATTCCTTAAGAAATCCTGCAGCAGTGCAGGAGCCTCCCTCTCTGCTTCCACTGATGTTGTTAATGTCGGCCGTTATGGAGTTATCTCGCATCACCTTTCCGTACTGTTTAAACAGAGGCAAACGCCA…	>comp2272293_c0_seq1 GATTCTTTTAGCAGCTTATAATTAATATTTATTATAGATCACTTACTACAACGAGTACACATGACACGTACACTCCACACTACATCATTTATTCTTCGGCAAAATGCTCTAATCCTCAAATTCACACTATGACGATTTGCTCAGCAGATTCAAGAATTCCACAACTGTTCTTGTTGGTCGACCACTCATTCCCTTGGGCAAGTACGGAATTTCGGATTTGGCGATCATCACCCCAGCTGTGTCAATGTGCATCCATTTCTCATGGGTCACAAATTCCTTAAGAAATCCTGCAGCAGTGCAGGAGCCTCCCTCTCTGCTTCCACTGATGTTGTTAATGTCGGCCGTTATGGAGTTATCTCGCATCACCTTTCCGTACTG…
comp2270517_c0_seq1	4.8e-131	1264	sp|Q8K3H0|DP13A_MOUSE	DCC-interacting protein 13-alpha OS=Mus musculus GN=Appl1 PE=1 SV=1	3.8e-129	1257	sp|Q9UKG1|DP13A_HUMAN	DCC-interacting protein 13-alpha OS=Homo sapiens GN=APPL1 PE=1 SV=1	2.4e-99	995	sp|Q8NEU8|DP13B_HUMAN	DCC-interacting protein 13-beta OS=Homo sapiens GN=APPL2 PE=1 SV=3			+		+		TAATAAAGACTTGTTAAGACACAACAAATAATTGACAGATAACTTATAGTGAGACAGACAAGAAAATAAGGTAAGTTCGCATTTATACAATTTACACTTAACCTACCATTTTACTTTCACAATTACTATTATTTCACAATATAAAAAATTAACACCTTAGCAATTTTTAGCATTTTATCAATTCCAAAATGACTATACTTCAACATTTTCATTCCGTACTGGCACTCATACTCGGCAGTACTCACATATTATTGTGTCCATACTGGCACCAATTATTCTAAATGTACCGTCATACCGTTCTTATTAATTACTGGTCATTGAAATCATGGGAGCCACGTTGCTTACATTAAGACACATAGACAACATAATCATCTTAAAACTGAGGCTTTTAAAGCAACG…	>comp2270517_c0_seq1 TAATAAAGACTTGTTAAGACACAACAAATAATTGACAGATAACTTATAGTGAGACAGACAAGAAAATAAGGTAAGTTCGCATTTATACAATTTACACTTAACCTACCATTTTACTTTCACAATTACTATTATTTCACAATATAAAAAATTAACACCTTAGCAATTTTTAGCATTTTATCAATTCCAAAATGACTATACTTCAACATTTTCATTCCGTACTGGCACTCATACTCGGCAGTACTCACATATTATTGTGTCCATACTGGCACCAATTATTCTAAATGTACCGTCATACCGTTCTTATTAATTACTGGTCATTGAAATCATGGGAGCCACGTTGCTTACATTAAGACACATAGACAACATAATCATCTTAAA…
gnl_Pdu_trscr_assembly_1_16296	1.6e-13	196	sp|P51397|DAP1_HUMAN	Death-associated protein 1 OS=Homo sapiens GN=DAP PE=1 SV=3	5.6e-13	191	sp|Q5EAE6|DAP1_BOVIN	Death-associated protein 1 OS=Bos taurus GN=DAP PE=3 SV=3	2.4e-12	185	sp|Q91XC8|DAP1_MOUSE	Death-associated protein 1 OS=Mus musculus GN=Dap PE=1 SV=3		+			+		GGAATTCCCGGGATAGAGAAGTTCAGACGGTTTATACGCAATTAATTGAGGAAAATGTCGTCCACAGAAGAGCCAGAATTGAAGGCAGGACACCCTCCAGCTGTGAAAGCTGGTGGCATGCGCATTGCCCGTACTCATCGTAACTCCGCCAGTGAGAAGACGGAACCAGCCGCAGCCGAGAATAAGGAAGATGAAGAACAGTACGAGCAGCCAAAGAAGCAAGAAAAGACAAATATTATGATAGGAGGCGTTCAGACGAAAAATGGCGACAAAGATTTCACTCCGGACGCAGTGAGACAATTCCACGATAAACCTCTCCCCTCGAAAGAGAAATCACACGCTAAGGTTCACCAAAACATCAATCAGCCCCGATAGACGTCTACCCGTCTGACGTCTGTA…	>gnl_Pdu_trscr_assembly_1_16296 GGAATTCCCGGGATAGAGAAGTTCAGACGGTTTATACGCAATTAATTGAGGAAAATGTCGTCCACAGAAGAGCCAGAATTGAAGGCAGGACACCCTCCAGCTGTGAAAGCTGGTGGCATGCGCATTGCCCGTACTCATCGTAACTCCGCCAGTGAGAAGACGGAACCAGCCGCAGCCGAGAATAAGGAAGATGAAGAACAGTACGAGCAGCCAAAGAAGCAAGAAAAGACAAATATTATGATAGGAGGCGTTCAGACGAAAAATGGCGACAAAGATTTCACTCCGGACGCAGTGAGACAATTCCACGATAAACCTCTCCCCTCGAAAGAGAAATCACACGCTAAGGTTCACCAAAACATCAATCAGC…
comp2265049_c0_seq3	1.1e-36	302	sp|Q71R50|DHR11_CHICK	Dehydrogenase/reductase SDR family member 11 OS=Gallus gallus GN=DHRS11 PE=2 SV=1	3.1e-35	303	sp|Q6UWP2|DHR11_HUMAN	Dehydrogenase/reductase SDR family member 11 OS=Homo sapiens GN=DHRS11 PE=1 SV=1	1.3e-34	293	sp|Q3U0B3|DHR11_MOUSE	Dehydrogenase/reductase SDR family member 11 OS=Mus musculus GN=Dhrs11 PE=1 SV=1		+			+		TGATTATGTATCACAGTGTTTTATTGATCATATCAAATTGAGAAACATACTGTACAATAATAATGGAATTCTTTGGAATGTTTGTGATTATTGTGATATTTGATCGTAAACGCAAAAAAATTAGTTGAAGTCATTTTAGTGCGTAATTTCGGGTGGACAGATCACGATTTAATTGCTTTGGCAATTAATTCTGGCAGGATGCTGTCGTACTGTTCTGTCGGCAGAAGAATTACCTCAAACATCTCAACGTGTTTTGGAGCCTTCAGCATAGAGAGGATGGCGTCTACGATATCTTCAGCATTCAGATTCTTAAAAGCAGAGGTCAAGGCTTTCGTGAAGACTTCTCCTCCTGTTTTGTTTTGGAAATTAGTAGCCACAGCGCCAGGGCTGATCTCAGAA…	>comp2265049_c0_seq3 TGATTATGTATCACAGTGTTTTATTGATCATATCAAATTGAGAAACATACTGTACAATAATAATGGAATTCTTTGGAATGTTTGTGATTATTGTGATATTTGATCGTAAACGCAAAAAAATTAGTTGAAGTCATTTTAGTGCGTAATTTCGGGTGGACAGATCACGATTTAATTGCTTTGGCAATTAATTCTGGCAGGATGCTGTCGTACTGTTCTGTCGGCAGAAGAATTACCTCAAACATCTCAACGTGTTTTGGAGCCTTCAGCATAGAGAGGATGGCGTCTACGATATCTTCAGCATTCAGATTCTTAAAAGCAGAGGTCAAGGCTTTCGTGAAGACTTCTCCTCCTGTTTTGTTTTGGAAATTAGTAGCCACA…
comp2271802_c0_seq1	2.5e-62	402	sp|Q8CIZ5|DMBT1_RAT	Deleted in malignant brain tumors 1 protein OS=Rattus norvegicus GN=Dmbt1 PE=1 SV=1	1.3e-61	458	sp|Q9UGM3|DMBT1_HUMAN	Deleted in malignant brain tumors 1 protein OS=Homo sapiens GN=DMBT1 PE=1 SV=2	5.2e-58	405	sp|Q95218|DMBT1_RABIT	Deleted in malignant brain tumors 1 protein OS=Oryctolagus cuniculus GN=Dmbt1 PE=1 SV=2			+		+		CAAGAGGTCAAACCAAAATGACCTCTCACCTCATTCTGTTGCTATGGTTGTCTTCATTCTCCATGGTTACCGCACAAGTCCCGACAGTCCAGGTCCGGTTAGCAGGAGGAATCCATCCAAGAGAAGGAAGAGTGGAGGTCTGGTATAACAACACGTGGGGGACAATCTGTGACGATGACTTCGACCAGCTGGACGCTGCTGTCATATGCAACATGCTCGGATTCAGGGGTGTGGCAAGGGCTCTGATGTCCCCTACAGTTTTTGGTGCTGGCTCAGGCCCAATCTGGCTTGACAACCTGTCTTGCAGTGGATTTGAGAGCAGCTTAGCCCTGTGCCCAAGCAACGGATGGGGGGTGGCTGACTGCACCCACAATGAAGATGCTGGAGTGAACTGTTATG…	>comp2271802_c0_seq1 CAAGAGGTCAAACCAAAATGACCTCTCACCTCATTCTGTTGCTATGGTTGTCTTCATTCTCCATGGTTACCGCACAAGTCCCGACAGTCCAGGTCCGGTTAGCAGGAGGAATCCATCCAAGAGAAGGAAGAGTGGAGGTCTGGTATAACAACACGTGGGGGACAATCTGTGACGATGACTTCGACCAGCTGGACGCTGCTGTCATATGCAACATGCTCGGATTCAGGGGTGTGGCAAGGGCTCTGATGTCCCCTACAGTTTTTGGTGCTGGCTCAGGCCCAATCTGGCTTGACAACCTGTCTTGCAGTGGATTTGAGAGCAGCTTAGCCCTGTGCCCAAGCAACGGATGGGGGGTGGCTGACTGCACCCACAATGAAG…
comp2275027_c0_seq1	4.9e-194	1767	sp|Q7SY23|AL4A1_DANRE	Delta-1-pyrroline-5-carboxylate dehydrogenase, mitochondrial OS=Danio rerio GN=aldh4a1 PE=2 SV=1	2.5e-188	1734	sp|P30038|AL4A1_HUMAN	Delta-1-pyrroline-5-carboxylate dehydrogenase, mitochondrial OS=Homo sapiens GN=ALDH4A1 PE=1 SV=3	4.6e-187	1718	sp|A7YWE4|AL4A1_BOVIN	Delta-1-pyrroline-5-carboxylate dehydrogenase, mitochondrial OS=Bos taurus GN=ALDH4A1 PE=2 SV=1			+		+		GACCAGATTGGAACATTTTCATTGTCTATTCATACGAAATATTCGCATCACCTAATTTTAAACATTTTTTGCAGTGGATTAATAATCAGCTGCCATGCATTTCTAAACAAATTTTCTGAAGATCTGTTATTACAACAATTATTCATTCATATGAAAAACATCTCGGAAGTACAATTTTTTTGTTCAAATATTTACAAATTCTGATTAAAAGCCCAATAAATACATGTGTACTTTAAAACTCGAGACACAATTTGAATATGATCTTAATTAATCATCATCAAAATACACAAGTATTGTATTCTCTAGCTCCACCTACTGGAACTATTTTTACTCATTCAATATGCATCCATACTTGAACACGCCTGATTATGTATTAATATGCAAAATTCTGCATAACAC…	>comp2275027_c0_seq1 GACCAGATTGGAACATTTTCATTGTCTATTCATACGAAATATTCGCATCACCTAATTTTAAACATTTTTTGCAGTGGATTAATAATCAGCTGCCATGCATTTCTAAACAAATTTTCTGAAGATCTGTTATTACAACAATTATTCATTCATATGAAAAACATCTCGGAAGTACAATTTTTTTGTTCAAATATTTACAAATTCTGATTAAAAGCCCAATAAATACATGTGTACTTTAAAACTCGAGACACAATTTGAATATGATCTTAATTAATCATCATCAAAATACACAAGTATTGTATTCTCTAGCTCCACCTACTGGAACTATTTTTACTCATTCAATATGCATCCATACTTGAACACGCCTGATTATGTATTAAT…
comp2257282_c0_seq1	2.8e-12	201	sp|Q61483|DLL1_MOUSE	Delta-like protein 1 OS=Mus musculus GN=Dll1 PE=1 SV=2	2.8e-12	201	sp|O00548|DLL1_HUMAN	Delta-like protein 1 OS=Homo sapiens GN=DLL1 PE=1 SV=2	1e-11	196	sp|P97677|DLL1_RAT	Delta-like protein 1 OS=Rattus norvegicus GN=Dll1 PE=1 SV=1		+			+		CCTTTTTTATTTTTGAAAATAGTTTTATTAATTTTTTGCTTGAGGCCTTGTATTGGTGGATATAGAGTTAGAACTGTAGTAAACCTGGTGCAATAACGTAAGCCTGTTACCCCACAAAAACGTTTGTTTTCAAACATTAGAGCATGTCTCGGGGATTCAGGAATCGGTCCAAAAATTTCTTCTTTAGATATTAGAATTCAGTTTTCCTTTATTTTGACAAATATATTCAAATCACCAAATTGTTTCTACGTTTCCTTTCTCACGCTGCAGTCAACTCCACCCCAGTCTGATGTGCAAATTTTGTTGCCAGTTTCTGGGTCACAGAGGTACTGGTTCTTAAAACGAGGAGCAGGTTGGCAAAATGCAGAGCAGTCATGTCCATAGAAATTGTGGGTGCAC…	>comp2257282_c0_seq1 CCTTTTTTATTTTTGAAAATAGTTTTATTAATTTTTTGCTTGAGGCCTTGTATTGGTGGATATAGAGTTAGAACTGTAGTAAACCTGGTGCAATAACGTAAGCCTGTTACCCCACAAAAACGTTTGTTTTCAAACATTAGAGCATGTCTCGGGGATTCAGGAATCGGTCCAAAAATTTCTTCTTTAGATATTAGAATTCAGTTTTCCTTTATTTTGACAAATATATTCAAATCACCAAATTGTTTCTACGTTTCCTTTCTCACGCTGCAGTCAACTCCACCCCAGTCTGATGTGCAAATTTTGTTGCCAGTTTCTGGGTCACAGAGGTACTGGTTCTTAAAACGAGGAGCAGGTTGGCAAAATGCAGAGCAGTCATGT…
comp2278076_c0_seq2	5.7e-16	243	sp|E9Q557|DESP_MOUSE	Desmoplakin OS=Mus musculus GN=Dsp PE=1 SV=1	7.1e-15	242	sp|P15924|DESP_HUMAN	Desmoplakin OS=Homo sapiens GN=DSP PE=1 SV=3	9.6e-15	222	sp|P30427|PLEC_RAT	Plectin OS=Rattus norvegicus GN=Plec PE=1 SV=2		+			+		GGGGAAAGTAAAATGGTTGAGTAGGCATGGGTAGCAGCATAGTGTTAAGGTAGACCAGTGCCTGCAGTGGCAGTGCCAGCATATAGCAACATTCATTAGTGCAGGAGCTACTAGAAAGTGCAGACCAACAACAATAGTGCATCAGAATAAGGATTTACCAAGGGATAAGCTTTTGCAACAGGACTACTTGAGGAACTACTTCTTTGAAGTGGATGTACCCAGCTGATGATTCCTGAAGATATTTAATTATTGAATTAGTATTTTAGTATATATCTGAGGAATTTACCATTGGAATTTACCCTTATCTTAAGGTTACAAAAACCCAAGCATCGCCATGAGTAGGGGAGGAGGAGATTACCAGGCTTGCCTGGAATGGATTTACCAACAAAGGGATTCCAT…	>comp2278076_c0_seq2 GGGGAAAGTAAAATGGTTGAGTAGGCATGGGTAGCAGCATAGTGTTAAGGTAGACCAGTGCCTGCAGTGGCAGTGCCAGCATATAGCAACATTCATTAGTGCAGGAGCTACTAGAAAGTGCAGACCAACAACAATAGTGCATCAGAATAAGGATTTACCAAGGGATAAGCTTTTGCAACAGGACTACTTGAGGAACTACTTCTTTGAAGTGGATGTACCCAGCTGATGATTCCTGAAGATATTTAATTATTGAATTAGTATTTTAGTATATATCTGAGGAATTTACCATTGGAATTTACCCTTATCTTAAGGTTACAAAAACCCAAGCATCGCCATGAGTAGGGGAGGAGGAGATTACCAGGCTTGCCTGGAATGGAT…
comp2272378_c0_seq1	3.6e-192	1871	sp|Q8CIZ7|DLDH_CRIGR	Dihydrolipoyl dehydrogenase, mitochondrial OS=Cricetulus griseus GN=DLD PE=2 SV=1	5.9e-192	1869	sp|P09622|DLDH_HUMAN	Dihydrolipoyl dehydrogenase, mitochondrial OS=Homo sapiens GN=DLD PE=1 SV=2	1.6e-191	1865	sp|O08749|DLDH_MOUSE	Dihydrolipoyl dehydrogenase, mitochondrial OS=Mus musculus GN=Dld PE=1 SV=2			+		+		CTTCCTGCTTCTGCTCGACCTGACAGAAGGCTGGTGATTGCAGCTGTCACCGCTAAAATGATGGTATTTTCGTTAAAGACGGTCATGCCTCGCATGGTGCAGGCTGGCCAGAGGTATGGCGGTGCACGAACAGTGGCTGGGCTGAATTCCACTTTCACCAGACATTACTCGAGTGAGGGAGAGGCAGATCTGGTCGTCATTGGATCTGGCCCTGGTGGATATGTCGCTGCAATCAAGGCTGCCCAGCTCGGTTTGAATACTGTTTGCGTAGAAAAGAATGACACCCTTGGCGGAACTTGCCTGAACGTGGGATGCATCCCATCCAAAGCTCTCCTCAACAACTCTCACTACTACCACATGGCCAAGCACAACGACCTTGCTAACAGGGGAATCGAATTT…	>comp2272378_c0_seq1 CTTCCTGCTTCTGCTCGACCTGACAGAAGGCTGGTGATTGCAGCTGTCACCGCTAAAATGATGGTATTTTCGTTAAAGACGGTCATGCCTCGCATGGTGCAGGCTGGCCAGAGGTATGGCGGTGCACGAACAGTGGCTGGGCTGAATTCCACTTTCACCAGACATTACTCGAGTGAGGGAGAGGCAGATCTGGTCGTCATTGGATCTGGCCCTGGTGGATATGTCGCTGCAATCAAGGCTGCCCAGCTCGGTTTGAATACTGTTTGCGTAGAAAAGAATGACACCCTTGGCGGAACTTGCCTGAACGTGGGATGCATCCCATCCAAAGCTCTCCTCAACAACTCTCACTACTACCACATGGCCAAGCACAACGACCTT…
comp2273628_c0_seq6	3.9e-47	304	sp|Q9UJU6|DBNL_HUMAN	Drebrin-like protein OS=Homo sapiens GN=DBNL PE=1 SV=1	3.1e-27	325	sp|Q9JHL4|DBNL_RAT	Drebrin-like protein OS=Rattus norvegicus GN=Dbnl PE=1 SV=1	2e-25	316	sp|Q62418|DBNL_MOUSE	Drebrin-like protein OS=Mus musculus GN=Dbnl PE=1 SV=2			+	+	++		GAGCTTTTTCAGGGGTTCTCATCTGACAATTCACGCCAGAACAGAGGATGATCTCGAGGAGGAGGACATTTTGGAGAAAATTTCAAAATCGTCCTCAAATTACAGTTTCCACCGTGAATTGGCACAGCCTATGCCCGACGCTGGACCTGTGGAAGATGACCCTGGATCTGTCTACAAGAGAACCCTTCCCCAAGCAGAAATCAAATCCACCAACAGAGATGCCTTCTGGCAAAAACAACAGGAAGAGGAGAAGAAAAGACAAGAAGAAGAAAAACTACGAAAATCAGCAGAACTGAAGAAACTTGATGAAGAAAGGAAGGAGCGAGAGAAAACGGAAGCCTCAGACAGAGAGAAGAGGGAACAAGAAAGACAGAAAAAGATCAGAGAGATTAAAAACGC…	>comp2273628_c0_seq6 GAGCTTTTTCAGGGGTTCTCATCTGACAATTCACGCCAGAACAGAGGATGATCTCGAGGAGGAGGACATTTTGGAGAAAATTTCAAAATCGTCCTCAAATTACAGTTTCCACCGTGAATTGGCACAGCCTATGCCCGACGCTGGACCTGTGGAAGATGACCCTGGATCTGTCTACAAGAGAACCCTTCCCCAAGCAGAAATCAAATCCACCAACAGAGATGCCTTCTGGCAAAAACAACAGGAAGAGGAGAAGAAAAGACAAGAAGAAGAAAAACTACGAAAATCAGCAGAACTGAAGAAACTTGATGAAGAAAGGAAGGAGCGAGAGAAAACGGAAGCCTCAGACAGAGAGAAGAGGGAACAAGAAAGACAGAAAAA…
comp2277951_c0_seq2	3.5e-249	2409	sp|Q6PCJ1|DCTN1_XENLA	Dynactin subunit 1 OS=Xenopus laevis GN=dctn1 PE=2 SV=1	1.9e-243	2355	sp|Q14203|DCTN1_HUMAN	Dynactin subunit 1 OS=Homo sapiens GN=DCTN1 PE=1 SV=3	4e-241	2333	sp|O08788|DCTN1_MOUSE	Dynactin subunit 1 OS=Mus musculus GN=Dctn1 PE=1 SV=3	+		+		++		GGAATTTTTCTGTTAGCAGCACATTGCAAAGCTTTAATAAGTTTCAGTTGAAAGACAGGATTCAGAAAGCAATTTAAATACGTAATATTCAAATTAACCAAAGCCTTCTGCAAGAAAAAGTAAGGACTATTGTTCTCAAATAATGAGATAACAGAATTTCAAAAGACTAACGACATGATTTATGAAGCTTGAAAGGATGACAGAATGAAACAAATAATACCAAAGTTATAACATAACTTAAGCATGTCAAATATTAGGCACACCTTACATTACATTTACCATTATACCGCCATTTACACTTATAATTTGTGTATTATATTCTGTTATCAATTAATATTGAACGAGGAGTCAGAAATATTTTAACTAGCTTGACTTAAATCCACCAGTTTGAATGAAATG…	>comp2277951_c0_seq2 GGAATTTTTCTGTTAGCAGCACATTGCAAAGCTTTAATAAGTTTCAGTTGAAAGACAGGATTCAGAAAGCAATTTAAATACGTAATATTCAAATTAACCAAAGCCTTCTGCAAGAAAAAGTAAGGACTATTGTTCTCAAATAATGAGATAACAGAATTTCAAAAGACTAACGACATGATTTATGAAGCTTGAAAGGATGACAGAATGAAACAAATAATACCAAAGTTATAACATAACTTAAGCATGTCAAATATTAGGCACACCTTACATTACATTTACCATTATACCGCCATTTACACTTATAATTTGTGTATTATATTCTGTTATCAATTAATATTGAACGAGGAGTCAGAAATATTTTAACTAGCTTGACTTAAA…
comp2254394_c0_seq2	1e-59	621	sp|P29692|EF1D_HUMAN	Elongation factor 1-delta OS=Homo sapiens GN=EEF1D PE=1 SV=5	3.5e-59	616	sp|A5D989|EF1D_BOVIN	Elongation factor 1-delta OS=Bos taurus GN=EEF1D PE=2 SV=2	4.5e-59	615	sp|P53787|EF1D_RABIT	Elongation factor 1-delta OS=Oryctolagus cuniculus GN=EEF1D PE=2 SV=1	+				+		TTGGCAATTAAAATGTTCACAAACAATAACTTTATTGCATTGTAAAAATACACACCACAATGACAACACCTAGGACTGGTCTAAATTAGATTTTGTTAAAGGCTGCGATATCCATACTCTGGACGTAATCTTCAAATGCACATATCTTCTCCTCTAGGTCGTCTGTGCTGATCTTGTCATCTTCTACAACGCACATGATTTGGAGTTTCTTGATTCCGTAGGCAAGAGGTACCAATTTTGAAGCTCCCCAGAGGAGGCCATCCATTTCGATCGTTCTGACTTGCTTCTCGAGGGCGGCCATATCAGTTTCGTCATCCCAGGGTTTGACGTCAAGGAGGATGGAACTCTTGGCGATCAGAGGTGCTTTCTTGGCCTTCTTGGCAGCGTAGGCGGCTACTC…	>comp2254394_c0_seq2 TTGGCAATTAAAATGTTCACAAACAATAACTTTATTGCATTGTAAAAATACACACCACAATGACAACACCTAGGACTGGTCTAAATTAGATTTTGTTAAAGGCTGCGATATCCATACTCTGGACGTAATCTTCAAATGCACATATCTTCTCCTCTAGGTCGTCTGTGCTGATCTTGTCATCTTCTACAACGCACATGATTTGGAGTTTCTTGATTCCGTAGGCAAGAGGTACCAATTTTGAAGCTCCCCAGAGGAGGCCATCCATTTCGATCGTTCTGACTTGCTTCTCGAGGGCGGCCATATCAGTTTCGTCATCCCAGGGTTTGACGTCAAGGAGGATGGAACTCTTGGCGATCAGAGGTGCTTTCTTGGCCTTCT…
comp2269345_c0_seq1	0	3584	sp|P13060|EF2_DROME	Elongation factor 2 OS=Drosophila melanogaster GN=EF2 PE=1 SV=4	0	3556	sp|Q1HPK6|EF2_BOMMO	Translation elongation factor 2 OS=Bombyx mori GN=tef2 PE=1 SV=1	0	3523	sp|P29691|EF2_CAEEL	Elongation factor 2 OS=Caenorhabditis elegans GN=eef-2 PE=2 SV=4		+			+		TCTGCCTTTCTTCGAGTCCGCCATCAGTGGATAACATCATAGTTTGAGTGGAGCGCGGAACATCCACTAACATCCAAGATGGTTAACTTTACGGTAGACGAGATCCGGGCCATTATGGACCGGAAAAGAAACATCCGTAACATGTCTGTGATCGCTCACGTCGATCACGGCAAATCTACACTGACAGACTCCCTTGTCAGTAAAGCCGGTATCATTGCCGGCTCAAGAGCAGGCGAGACTCGATTCACCGACACGAGAAAAGATGAGCAGGAAAGATGCATCACCATCAAGTCCACCGCCATCTCCCTCTACTACACCATGACAGAGAAGGATTGCTCCTTCATCCTCCAAGAGAAGGAAGAGGGGCTCACGTCTTTCTTAATCAACTTGATCGACTCC…	>comp2269345_c0_seq1 TCTGCCTTTCTTCGAGTCCGCCATCAGTGGATAACATCATAGTTTGAGTGGAGCGCGGAACATCCACTAACATCCAAGATGGTTAACTTTACGGTAGACGAGATCCGGGCCATTATGGACCGGAAAAGAAACATCCGTAACATGTCTGTGATCGCTCACGTCGATCACGGCAAATCTACACTGACAGACTCCCTTGTCAGTAAAGCCGGTATCATTGCCGGCTCAAGAGCAGGCGAGACTCGATTCACCGACACGAGAAAAGATGAGCAGGAAAGATGCATCACCATCAAGTCCACCGCCATCTCCCTCTACTACACCATGACAGAGAAGGATTGCTCCTTCATCCTCCAAGAGAAGGAAGAGGGGCTCACGTCTTTC…
comp2244437_c0_seq1	1e-52	555	sp|Q2KII4|ELOC_BOVIN	Elongin-C OS=Bos taurus GN=ELOC PE=3 SV=1	1e-52	555	sp|Q15369|ELOC_HUMAN	Elongin-C OS=Homo sapiens GN=ELOC PE=1 SV=1	1e-52	555	sp|P83940|ELOC_MOUSE	Elongin-C OS=Mus musculus GN=Eloc PE=1 SV=1			+		+		GTTTTTAGGCATAAAATTAATACATTTATTCACAAAAGGTCATGAAGAGCAATCAACCTGTCATCAGTCTTCTGATCTGGGATATCATTTTTGGTTATAATCATCTATTGGAAACGCTCTACGAGGTGTACACAAGAATCGAATGACAGTCGCTTAAAACGAAATGAGCAATGGACTTCCCAGAAGCAGAGAACTACGAAACCTCGAGGAGAGTGACAAGTCGTGTACTTTGGTACAAAATCTTACTACAAAACCTAAATGTCACATTTGTAGGAACAAGTATTTCAAAGACAGAAAACTGGTCTAAATTTATAACAAATATATTGAACATTTCAACGCAACTCAAGTTTCTTGCAACGTTAAGTCCGGATAATAAACATTAGACAACTTATGTCACAA…	>comp2244437_c0_seq1 GTTTTTAGGCATAAAATTAATACATTTATTCACAAAAGGTCATGAAGAGCAATCAACCTGTCATCAGTCTTCTGATCTGGGATATCATTTTTGGTTATAATCATCTATTGGAAACGCTCTACGAGGTGTACACAAGAATCGAATGACAGTCGCTTAAAACGAAATGAGCAATGGACTTCCCAGAAGCAGAGAACTACGAAACCTCGAGGAGAGTGACAAGTCGTGTACTTTGGTACAAAATCTTACTACAAAACCTAAATGTCACATTTGTAGGAACAAGTATTTCAAAGACAGAAAACTGGTCTAAATTTATAACAAATATATTGAACATTTCAACGCAACTCAAGTTTCTTGCAACGTTAAGTCCGGATAATAAAC…
comp2253561_c0_seq1	5e-44	473	sp|P52555|ERP29_RAT	Endoplasmic reticulum resident protein 29 OS=Rattus norvegicus GN=Erp29 PE=1 SV=2	2.8e-43	466	sp|P57759|ERP29_MOUSE	Endoplasmic reticulum resident protein 29 OS=Mus musculus GN=Erp29 PE=1 SV=2	1.2e-42	460	sp|P30040|ERP29_HUMAN	Endoplasmic reticulum resident protein 29 OS=Homo sapiens GN=ERP29 PE=1 SV=4			+		+		GCTGCCTCTCGTATAAGGGGTCCTGAGACTTGGAAGTGAGAATTTAGACTGAACTAAATTTTCAACAATTTATTGTTTGAGAAAGTAAAGAAGTAAGGGACTTTCATAATACAAAATCATCCTTTAAATGCAATTTTGAGAAAGTAATAATCTGACAACATGATAATTTACCCATAATTGTAAAATTTGCAAGTTAAATCAAGTGTCTTGTTATGTAGAACAATTGTAAGGTGGGCATTTAATTGAAGCACAAGCAATTAGCATGATCTAATAACATGGAAAATGATATCAAATCAAAGTAAATAATACATAGCAATTGTGGCAAAAATGTAAGTTAATATTACAGAAGTTGCAAAAAAGTTGACATATAATCCCAATTGAGCGCTTGAACATTTTGAC…	>comp2253561_c0_seq1 GCTGCCTCTCGTATAAGGGGTCCTGAGACTTGGAAGTGAGAATTTAGACTGAACTAAATTTTCAACAATTTATTGTTTGAGAAAGTAAAGAAGTAAGGGACTTTCATAATACAAAATCATCCTTTAAATGCAATTTTGAGAAAGTAATAATCTGACAACATGATAATTTACCCATAATTGTAAAATTTGCAAGTTAAATCAAGTGTCTTGTTATGTAGAACAATTGTAAGGTGGGCATTTAATTGAAGCACAAGCAATTAGCATGATCTAATAACATGGAAAATGATATCAAATCAAAGTAAATAATACATAGCAATTGTGGCAAAAATGTAAGTTAATATTACAGAAGTTGCAAAAAAGTTGACATATAATCCCAAT…
comp2271896_c0_seq2	2.9e-74	686	sp|Q9D1Q6|ERP44_MOUSE	Endoplasmic reticulum resident protein 44 OS=Mus musculus GN=Erp44 PE=1 SV=1	1.1e-72	669	sp|Q9BS26|ERP44_HUMAN	Endoplasmic reticulum resident protein 44 OS=Homo sapiens GN=ERP44 PE=1 SV=1	2e-71	653	sp|Q3T0L2|ERP44_BOVIN	Endoplasmic reticulum resident protein 44 OS=Bos taurus GN=ERP44 PE=2 SV=1			+		+		ACGCCATCGTGGGGTTCATTCGAGAACAGTTGAAAGACAATATTCAGAGGGTGACTAATATGGACGACTTGGACAATATTGATAGAAAAAAGAGGCTTGTAATAGGCTACTTTGACTCAGAGCAGAACGTTGATTTCACCAACTACAGGAAAGTGGCCAGCGTCTTGAGGGATGATTGCCAGTTCTACGCTGCTGTCGGTGATTTGTCTTCATCAGAAAGGTTGGCTGGAAATAAATTAGTCTACAGACCCACAAACGTGGACCACAGTGACATTCCCTACACTGGATCCATGTCGGACTCCAACTTACTGCAAGCTTGGGCAACAGACAAGTGTGTGCCTCTAGTCAGAGAAATCACTTTTGAAAATGCTGAGGAGTTAACAGAAGAGGGCCTTCCGT…	>comp2271896_c0_seq2 ACGCCATCGTGGGGTTCATTCGAGAACAGTTGAAAGACAATATTCAGAGGGTGACTAATATGGACGACTTGGACAATATTGATAGAAAAAAGAGGCTTGTAATAGGCTACTTTGACTCAGAGCAGAACGTTGATTTCACCAACTACAGGAAAGTGGCCAGCGTCTTGAGGGATGATTGCCAGTTCTACGCTGCTGTCGGTGATTTGTCTTCATCAGAAAGGTTGGCTGGAAATAAATTAGTCTACAGACCCACAAACGTGGACCACAGTGACATTCCCTACACTGGATCCATGTCGGACTCCAACTTACTGCAAGCTTGGGCAACAGACAAGTGTGTGCCTCTAGTCAGAGAAATCACTTTTGAAAATGCTGAGGAGT…
gnl_Pdu_trscr_assembly_1_326	4.5e-297	2861	sp|Q29092|ENPL_PIG	Endoplasmin OS=Sus scrofa GN=HSP90B1 PE=2 SV=3	7.3e-297	2859	sp|Q4R520|ENPL_MACFA	Endoplasmin OS=Macaca fascicularis GN=HSP90B1 PE=2 SV=1	5.1e-296	2851	sp|Q66HD0|ENPL_RAT	Endoplasmin OS=Rattus norvegicus GN=Hsp90b1 PE=1 SV=2				+	+		TGGTATCAACGCAGAGTACGCGGGGAAGGAAACGTCGGATCGTGGTCGGCGCTGATTGGCTGAACGGAGCACATGGAGTCTGTTCCCCGAGATTTCTTATTCCCCCCTTTCCTTCAGAAATTGCAGTGTTGGTGTGGTTTTCTAACGAAGGAATAAGGGATTTTCGAGGGGAGAAAGCCGCAATGGCTCGGAAATACCTGTTCCTAGGGCTCCTGGGAATATTTCTGCTAACAGCGGTGGCAGTGGCACAAGAAGCAGCAGAGGAGGAGCCCGCGGTTGTGGAAGAAGATCTTGGAAAGAGTCGAGATGGCTCAAGAACTGATGATGAGGTCGTTAAAAGGGAGGAGGAAGCGATTCAATTAGATGGGTTATCAGTGGCAGAAATGAAAGAATTAAGAG…	>gnl_Pdu_trscr_assembly_1_326 TGGTATCAACGCAGAGTACGCGGGGAAGGAAACGTCGGATCGTGGTCGGCGCTGATTGGCTGAACGGAGCACATGGAGTCTGTTCCCCGAGATTTCTTATTCCCCCCTTTCCTTCAGAAATTGCAGTGTTGGTGTGGTTTTCTAACGAAGGAATAAGGGATTTTCGAGGGGAGAAAGCCGCAATGGCTCGGAAATACCTGTTCCTAGGGCTCCTGGGAATATTTCTGCTAACAGCGGTGGCAGTGGCACAAGAAGCAGCAGAGGAGGAGCCCGCGGTTGTGGAAGAAGATCTTGGAAAGAGTCGAGATGGCTCAAGAACTGATGATGAGGTCGTTAAAAGGGAGGAGGAAGCGATTCAATTAGATGGGT…
comp2274031_c0_seq3	4.9e-36	316	sp|P98072|ENTK_BOVIN	Enteropeptidase OS=Bos taurus GN=TMPRSS15 PE=1 SV=1	7e-36	325	sp|P98073|ENTK_HUMAN	Enteropeptidase OS=Homo sapiens GN=TMPRSS15 PE=1 SV=3	7.3e-33	309	sp|P98074|ENTK_PIG	Enteropeptidase OS=Sus scrofa GN=TMPRSS15 PE=1 SV=1		+			+	Group Enteropeptidase	GTTTTAATGAACATTTTATTAACAAATTAACATTGGTATGTTTGGCATCTGAAGATAACACAGAAGGCCAGTCCTGGTGTCTCTTTCATTTTGACCAAGGTTAATCAAAATTTCCCATGGTGGTCTGAATCCATGACATGGCATGGTGTACATTGGCGTATACACCCGGTGTCCTCTTGCGGTTTGCACACTTATCTCCAAATGATACGGCTCCAATAACTTCGTATTTGCCATCTTTGCGTTGACAAACCAGGGGGCCTCCTGAATCTCCCTGGCAGACATCTCCATATCCTTTCACTGAAATGGCACAGACCTGATCTTCAAAAGTTCTGTACAAGCACTGCCTTCTGTTGATGACTTGTTGTGTGATGTGGAGCAGGTGAACACTTGTGTCTCCTG…	>comp2274031_c0_seq3_Group Enteropeptidase GTTTTAATGAACATTTTATTAACAAATTAACATTGGTATGTTTGGCATCTGAAGATAACACAGAAGGCCAGTCCTGGTGTCTCTTTCATTTTGACCAAGGTTAATCAAAATTTCCCATGGTGGTCTGAATCCATGACATGGCATGGTGTACATTGGCGTATACACCCGGTGTCCTCTTGCGGTTTGCACACTTATCTCCAAATGATACGGCTCCAATAACTTCGTATTTGCCATCTTTGCGTTGACAAACCAGGGGGCCTCCTGAATCTCCCTGGCAGACATCTCCATATCCTTTCACTGAAATGGCACAGACCTGATCTTCAAAAGTTCTGTACAAGCACTGCCTTCTGTTGATG…
comp2274537_c0_seq28	1.5e-44	377	sp|P98072|ENTK_BOVIN	Enteropeptidase OS=Bos taurus GN=TMPRSS15 PE=1 SV=1	1.8e-44	381	sp|P98073|ENTK_HUMAN	Enteropeptidase OS=Homo sapiens GN=TMPRSS15 PE=1 SV=3	7.2e-43	379	sp|P98074|ENTK_PIG	Enteropeptidase OS=Sus scrofa GN=TMPRSS15 PE=1 SV=1				+	+	Group Enteropeptidase	GTTTGTATACTGCAGGGCACCAGGTACAGGTCGTCCGCATCATGAAGGTCAAACTATTAACGACCTTGACCTTGATATTCTGTCTCACACTCCCACAATGCTACGCTACTCAAAAAGAAGAATTTCTCGAGGTTCTCAGAGAACTTGCACATGAGGCGGATGATGAATATAGTCTGAAACCAATTCCAACTGAACCAGAGGATCCAACAAAGAGACACCTAGATCCAGAGGCATGTGGGGAGTCAGCAGCAAGAAAGACGGCCGCCAGAGGGACTATCGACTTCCCTCACGGAAACGAAAAGTACTCCAGGCTAGCTAGCTGTGGTTGGGCTATTGTGGGAAAGTCAGGATCAACTGTATCCTCTGTTTCCATTACCTTTACCTTTATCAACATCGAGG…	>comp2274537_c0_seq28_Group Enteropeptidase GTTTGTATACTGCAGGGCACCAGGTACAGGTCGTCCGCATCATGAAGGTCAAACTATTAACGACCTTGACCTTGATATTCTGTCTCACACTCCCACAATGCTACGCTACTCAAAAAGAAGAATTTCTCGAGGTTCTCAGAGAACTTGCACATGAGGCGGATGATGAATATAGTCTGAAACCAATTCCAACTGAACCAGAGGATCCAACAAAGAGACACCTAGATCCAGAGGCATGTGGGGAGTCAGCAGCAAGAAAGACGGCCGCCAGAGGGACTATCGACTTCCCTCACGGAAACGAAAAGTACTCCAGGCTAGCTAGCTGTGGTTGGGCTATTGTGGGAAAGTCAGGATCAAC…
comp2247098_c0_seq1	0.00083	108	sp|P86734|EPDR1_HALAI	Ependymin-related protein 1 OS=Haliotis asinina GN=Sometsuke PE=1 SV=1	0.79	83	sp|P86729|EPDR2_HALAI	Ependymin-related protein 2 OS=Haliotis asinina PE=1 SV=1	0.98	79	sp|A8F863|RRF_PSELT	Ribosome-recycling factor OS=Pseudothermotoga lettingae (strain ATCC BAA-301 / DSM 14385 / NBRC 107922 / TMO) GN=frr PE=3 SV=1	+	+			++	Group_ependymins	TTGGGATGCAGTTCTTGGTGACGGACATTTCTTCCTTCAAATTCGTGGCTGGGTCAGTGGTTTGGTAGGTGAAACCATCAATGGAATCCAAACCATAGCCAATGCGATAATCGCCGACCAATCTGGCGCCCTCACGCAGACATCCATCAGACTGTGGTTCCTTGAATGCTTGTTGCACACATCCACCGTCCCCGGAACTAATGAGGTAGGCCACTTGCTTTTTGTAATCGATGACAATTCTCCTTTGAACTTTACCGGTTGCCCTGTCAAAATATTTCAAACCAGTGATACCATCTCCAGTGGCATAGATGGAGTACAGCTGTCGGAATGGAAATTCGGCACCAGCATAATCAAAGAGTACTTCTCCCAAGAACGTCATCTGCATATTTTTGGGCATAC…	>comp2247098_c0_seq1_Group_ependymins TTGGGATGCAGTTCTTGGTGACGGACATTTCTTCCTTCAAATTCGTGGCTGGGTCAGTGGTTTGGTAGGTGAAACCATCAATGGAATCCAAACCATAGCCAATGCGATAATCGCCGACCAATCTGGCGCCCTCACGCAGACATCCATCAGACTGTGGTTCCTTGAATGCTTGTTGCACACATCCACCGTCCCCGGAACTAATGAGGTAGGCCACTTGCTTTTTGTAATCGATGACAATTCTCCTTTGAACTTTACCGGTTGCCCTGTCAAAATATTTCAAACCAGTGATACCATCTCCAGTGGCATAGATGGAGTACAGCTGTCGGAATGGAAATTCGGCACCAGCATAATCAAAGAGTAC…
comp2268869_c0_seq6	0.0032	112	sp|Q5XII0|EPDR1_RAT	Ependymin-related protein 1(mammalian) OS=Rattus norvegicus GN=Epdr1 PE=2 SV=1	0.016	106	sp|Q9UM22|EPDR1_HUMAN	Mammalian ependymin-related protein 1 OS=Homo sapiens GN=EPDR1 PE=1 SV=2	0.021	105	sp|Q9N0C7|EPDR1_MACFA	Mammalian ependymin-related protein 1 OS=Macaca fascicularis GN=EPDR1 PE=2 SV=3	+				+	Group_ependymins	CTTGTAGGCCACACCATCATCAAAGTGTTATTCCTGACTGAACACCGAAATAGCAAGATGTCCTTGTTGTTGATTTTATTAGGATTTGTGTCCGTAACTTTAGCCCGAGTCGCTGTTAGTGACCAGGAAAAGTTGGCACCTAAACCATGCTGCTTCCCCAAGACGTTGCAGGTGAACTTCTTTGGAGCCGAGTTCTTTGAGACTGCAAGCCCTTCTCTCGTTCCATTGATTGGCACCTATGCTATCAAATCTGACGAGGGAACGGCTGCCCTGCAAGTTTTAGATGGAAAGACTCGACTACCTGTGAGGAAAGAAATCTTGGACTACAATAGCAAAATCCTGTACAACATCAGCGCTGACGGTTCATGCGTCAAGTCTCCATACACCGAGCCCAGACCT…	>comp2268869_c0_seq6_Group_ependymins CTTGTAGGCCACACCATCATCAAAGTGTTATTCCTGACTGAACACCGAAATAGCAAGATGTCCTTGTTGTTGATTTTATTAGGATTTGTGTCCGTAACTTTAGCCCGAGTCGCTGTTAGTGACCAGGAAAAGTTGGCACCTAAACCATGCTGCTTCCCCAAGACGTTGCAGGTGAACTTCTTTGGAGCCGAGTTCTTTGAGACTGCAAGCCCTTCTCTCGTTCCATTGATTGGCACCTATGCTATCAAATCTGACGAGGGAACGGCTGCCCTGCAAGTTTTAGATGGAAAGACTCGACTACCTGTGAGGAAAGAAATCTTGGACTACAATAGCAAAATCCTGTACAACATCAGCGCTGACG…
comp2263873_c0_seq9	0.012	108	sp|P86729|EPDR2_HALAI	Ependymin-related protein 2 OS=Haliotis asinina PE=1 SV=1											+	+	++	Group_ependymins	TCATGAAATGCATATCTTATATTTCCGTCCCAATGTTAAGGGGCAGACCAGATGATATCTGATGAAATCTGACGGGTCTGATTTTTTTTGTGAAAGAAAAAATAGATGTTGTCACCCAAGCATGAGCCTTTCTAAGCTCCCCCGAGAGTATAAAGCCAGGTAGATGTTTACACCTGGGTGGAGTGAAGCAGTGATTCAAGGGGGATCTCTTCATCTCCTCCATGCCCCCAGCGGAGTTTGATCCCACAACCTTGCACATTGAGCCATTATCAGGCTGGGCCTTGTCCACATTGTCCATGCATTTCGATATAGCCAAGTTCTGTGGAAGGACAACTATAGGGGCTTCAAGCCCGGATCTCTATGGAGGAAAAGACGCTGAGTGTAGGACATCGCAATGTT…	>comp2263873_c0_seq9_Group_ependymins TCATGAAATGCATATCTTATATTTCCGTCCCAATGTTAAGGGGCAGACCAGATGATATCTGATGAAATCTGACGGGTCTGATTTTTTTTGTGAAAGAAAAAATAGATGTTGTCACCCAAGCATGAGCCTTTCTAAGCTCCCCCGAGAGTATAAAGCCAGGTAGATGTTTACACCTGGGTGGAGTGAAGCAGTGATTCAAGGGGGATCTCTTCATCTCCTCCATGCCCCCAGCGGAGTTTGATCCCACAACCTTGCACATTGAGCCATTATCAGGCTGGGCCTTGTCCACATTGTCCATGCATTTCGATATAGCCAAGTTCTGTGGAAGGACAACTATAGGGGCTTCAAGCCCGGATCTCTA…
comp2268441_c0_seq1	0.022	98	sp|P86729|EPDR2_HALAI	Ependymin-related protein 2 OS=Haliotis asinina PE=1 SV=1	0.089	93	sp|P86734|EPDR1_HALAI	Ependymin-related protein 1 OS=Haliotis asinina GN=Sometsuke PE=1 SV=1						+			+	Group_ependymins	ATCTTTATTGTATGAATGTGATTATATAGAAGGATAATAATCAATAATTCAACTTAAGAAATATAATCATTTTTTTAAAGTAAATATTTATATATCATTGACGAGCATGTTGTTTCTATTCGAGCCCCATCAGCATGAACTTGGGGACGTACAAGTGCTCTTCCTCCAATGGTAGTGCCTCCTCTGTTTGATTCTTGCATGAATCTGGGATGTAAAACAAGCCTCTGTCAGTGATCCTGGGTCCAGCGTTCACATAGCCAACAGTTGCGAATACCTGTCCTCTTGTTCCATTAATGCTCATCTGAGCTCCAATCGGAACACAGTTCCTAGTGAAGGAGATGTTCTCGACGAAGTCCATGGTGGCGTTTGAGTAGACAAATGTCTTAACATGCAAAGTGT…	>comp2268441_c0_seq1_Group_ependymins ATCTTTATTGTATGAATGTGATTATATAGAAGGATAATAATCAATAATTCAACTTAAGAAATATAATCATTTTTTTAAAGTAAATATTTATATATCATTGACGAGCATGTTGTTTCTATTCGAGCCCCATCAGCATGAACTTGGGGACGTACAAGTGCTCTTCCTCCAATGGTAGTGCCTCCTCTGTTTGATTCTTGCATGAATCTGGGATGTAAAACAAGCCTCTGTCAGTGATCCTGGGTCCAGCGTTCACATAGCCAACAGTTGCGAATACCTGTCCTCTTGTTCCATTAATGCTCATCTGAGCTCCAATCGGAACACAGTTCCTAGTGAAGGAGATGTTCTCGACGAAGTCCATGGT…
isotig10568	0.042	101	sp|P86729|EPDR2_HALAI	Ependymin-related protein 2 OS=Haliotis asinina PE=1 SV=1	0.054	100	sp|P86734|EPDR1_HALAI	Ependymin-related protein 1 OS=Haliotis asinina GN=Sometsuke PE=1 SV=1					+	+	+		+++	Group_ependymins	CGGCCGGGGGGATAAATGTAAGGGTCAACTTCAGCAGTCACTGGCTATTTCTGTCTGAGTATTCCTAAGCAAAATGAACAGTCTGCTTGTCCTCCTGGGCCTTGTGTCCCTCAGCTATGGGTCTGCGATATGGAGCAAGAACATGGTTAAGGATCCAGCCTGCTGTTTTCAAAGACCTGGCCAGTTCACCTTCTTGGGCGAAGTACTCTACAACTACGCTGGTGCCGCTGTTCCATTCCAGCAGATGATGGCCGTCTATGCCACCAAGGATGGAATTGACGGTGTGAAATATTTTGATAGAAAATCCGGAAAACTGACAAGCAGAGCCGTCATTGATTTCAAAAATGGATTCATTTACAGAATCAACGAAGGTGGCGAATGTGTGAAACAGGCAACCAA…	>isotig10568_Group_ependymins CGGCCGGGGGGATAAATGTAAGGGTCAACTTCAGCAGTCACTGGCTATTTCTGTCTGAGTATTCCTAAGCAAAATGAACAGTCTGCTTGTCCTCCTGGGCCTTGTGTCCCTCAGCTATGGGTCTGCGATATGGAGCAAGAACATGGTTAAGGATCCAGCCTGCTGTTTTCAAAGACCTGGCCAGTTCACCTTCTTGGGCGAAGTACTCTACAACTACGCTGGTGCCGCTGTTCCATTCCAGCAGATGATGGCCGTCTATGCCACCAAGGATGGAATTGACGGTGTGAAATATTTTGATAGAAAATCCGGAAAACTGACAAGCAGAGCCGTCATTGATTTCAAAAATGGATTCATTTACAGAATCAACGA…
gnl_Pdu_trscr_assembly_1_1644	4.2e-219	2098	sp|Q6TH15|EIF3D_DANRE	Eukaryotic translation initiation factor 3 subunit D OS=Danio rerio GN=eif3d PE=2 SV=1	3.4e-217	2084	sp|Q6P8G0|EIF3D_XENTR	Eukaryotic translation initiation factor 3 subunit D OS=Xenopus tropicalis GN=eif3d PE=2 SV=1	5.5e-217	2060	sp|O15371|EIF3D_HUMAN	Eukaryotic translation initiation factor 3 subunit D OS=Homo sapiens GN=EIF3D PE=1 SV=1			+		+		GTTGTCATCTTCAGTCCAAGGATTGTCATTTTTTCGGCCGGTGCGGGGTCGCTGTGCCGGCCGCCATTGCAGTTTTCCAAACCACGTTGCCGGCTAAGCGAAAATGGCCCACTTCAATCCCCCAGTTATATCGGAAAATCCCTCAGGATGGGGTCCCTGCACTGTTCCAGACCAGTTCAAAGATATGCCCTACCAACCCTTCTCCAAAGGAGACCGTCTTGGAAAGGTTGCAGATTGGACTGGTGTTACGTACCAAGATAGGCGTTACATGAACAAGTACAACTCTCAATTCGGAGGTGGCATGGCTAACCAGTACGCCTATTTCCACGAGGATGATGAAAGTTCATTCCAACTTGTTGACACTGCCCGTGTGCAGAAGCCTATTTACCAGAGGGGTCG…	>gnl_Pdu_trscr_assembly_1_1644 GTTGTCATCTTCAGTCCAAGGATTGTCATTTTTTCGGCCGGTGCGGGGTCGCTGTGCCGGCCGCCATTGCAGTTTTCCAAACCACGTTGCCGGCTAAGCGAAAATGGCCCACTTCAATCCCCCAGTTATATCGGAAAATCCCTCAGGATGGGGTCCCTGCACTGTTCCAGACCAGTTCAAAGATATGCCCTACCAACCCTTCTCCAAAGGAGACCGTCTTGGAAAGGTTGCAGATTGGACTGGTGTTACGTACCAAGATAGGCGTTACATGAACAAGTACAACTCTCAATTCGGAGGTGGCATGGCTAACCAGTACGCCTATTTCCACGAGGATGATGAAAGTTCATTCCAACTTGTTGACACTGCCC…
comp2278414_c0_seq7	3.2e-228	2136	sp|Q6NZJ6|IF4G1_MOUSE	Eukaryotic translation initiation factor 4 gamma 1 OS=Mus musculus GN=Eif4g1 PE=1 SV=1	3.1e-225	2164	sp|Q80XI3|IF4G3_MOUSE	Eukaryotic translation initiation factor 4 gamma 3 OS=Mus musculus GN=Eif4g3 PE=1 SV=2	2e-221	2147	sp|Q04637|IF4G1_HUMAN	Eukaryotic translation initiation factor 4 gamma 1 OS=Homo sapiens GN=EIF4G1 PE=1 SV=4		+			+		GGGGGACGGAAACAGCCGAAGCCGTCTCCTTGCAGACTCCTATGCTAAGGAGACAAGCTTGGTAACAAGCTTCGGAACGGGTCCTCCCGCAGGACTAAAACTCTAGTTTCGATTGCAATGAACGTAACCAGAAAGGTTCCATCGGCATCACCACCCGTGTCAGCTCAAGGACAGCAGCGCGGACCACACCAGTATACTTACCAAGGGGACAGTAGGTTTGCCCGGCAACCTACCCCAACCTCGGTCCATTACAGACAGTCGGTCCCCGGCCACACGATACAATCACCTGAAGACCTGCAACTAAGAACTGTCTATCCTAGTCCACAACTTAACCCTGGCTACCAAACGGTGCAACACTCCGGTTCGGCTGGGGTGCATGACATGAGCAAGAGCCTCACT…	>comp2278414_c0_seq7 GGGGGACGGAAACAGCCGAAGCCGTCTCCTTGCAGACTCCTATGCTAAGGAGACAAGCTTGGTAACAAGCTTCGGAACGGGTCCTCCCGCAGGACTAAAACTCTAGTTTCGATTGCAATGAACGTAACCAGAAAGGTTCCATCGGCATCACCACCCGTGTCAGCTCAAGGACAGCAGCGCGGACCACACCAGTATACTTACCAAGGGGACAGTAGGTTTGCCCGGCAACCTACCCCAACCTCGGTCCATTACAGACAGTCGGTCCCCGGCCACACGATACAATCACCTGAAGACCTGCAACTAAGAACTGTCTATCCTAGTCCACAACTTAACCCTGGCTACCAAACGGTGCAACACTCCGGTTCGGCTGGGGTGCAT…
comp2275358_c0_seq1	1.5e-57	609	sp|P23588|IF4B_HUMAN	Eukaryotic translation initiation factor 4B OS=Homo sapiens GN=EIF4B PE=1 SV=2	8.7e-57	602	sp|Q8BGD9|IF4B_MOUSE	Eukaryotic translation initiation factor 4B OS=Mus musculus GN=Eif4b PE=1 SV=1	3.3e-26	337	sp|Q92804|RBP56_HUMAN	TATA-binding protein-associated factor 2N OS=Homo sapiens GN=TAF15 PE=1 SV=1				+	+		TTTTTTTTTTAAAGAATTCATCTTTTAATATGAATCATATGTCGATCATTCATAAAATACATGAAAACATACACAAAAATACAAGTGCATACTTGAATACATGCCACATATCTTTATGTACAAAATTGACAAACATTATAACATGAAATCCTGAATAAATTACTGCATGATTTAACTATTGTCCATTCATCGTCCAAAGATAATCAATACTTACGACCCTAATTAAGTCAAATTCACTTAAGGGGTCACATTTTTTTCATTTTGAATAATTTTATACAAAAGAGTACCAATGCATTAAAGCATCAGACAGGTAACAAAGTCATAGAATGAGTTTTCAGAATGTCACATTTACAAAGATTATTAGACACCTGTTACACTTTATATTGTGATGCAGTAGAA…	>comp2275358_c0_seq1 TTTTTTTTTTAAAGAATTCATCTTTTAATATGAATCATATGTCGATCATTCATAAAATACATGAAAACATACACAAAAATACAAGTGCATACTTGAATACATGCCACATATCTTTATGTACAAAATTGACAAACATTATAACATGAAATCCTGAATAAATTACTGCATGATTTAACTATTGTCCATTCATCGTCCAAAGATAATCAATACTTACGACCCTAATTAAGTCAAATTCACTTAAGGGGTCACATTTTTTTCATTTTGAATAATTTTATACAAAAGAGTACCAATGCATTAAAGCATCAGACAGGTAACAAAGTCATAGAATGAGTTTTCAGAATGTCACATTTACAAAGATTATTAGACACCTGTTACACT…
comp1785956_c0_seq1	2.9e-25	296	sp|P02219|GLB1_TYLHE	Extracellular globin-1 OS=Tylorrhynchus heterochaetus PE=1 SV=1	2e-24	288	sp|P11740|GLB1_METSO	Extracellular globin-1 OS=Metaphire sieboldi PE=1 SV=1	9e-22	263	sp|P80592|GLBB_RIFPA	Giant hemoglobins B chain OS=Riftia pachyptila PE=1 SV=1			+		+	Group_globins	TTTTTAATTTATGAAGCATTTATTTTAACAACTGTTCATACAACTGCTTATGAACAATGAGGACCATACAGGATATGAGACAATATAAAATAAATATGTATATCACAGCTCTGTAAAAATAAAACACTCGCTCAAATTAACGCCCCAGCCTGCTGGTGTTGCGGTATCCATGACGATGTCCATTGTTGATAAGCAGATTTGTTCGGAGTTGGTTTTAGTACAAGGTCATACTCTGGGTGTGTCGTCCCATTACTCGCTGACTCCAGCAGCAATCAGGTTGAAGCAAGGGCGCCAAGCTGTAATGTCAGGCTTGCCGTCCATGAATTCAGGGAGCACACGGGCGATGGACTTGCCAAATTCCTTAATAATTTCAGTGGTCACTCCCAAATCGTTGTGCAT…	>comp1785956_c0_seq1_Group_globins TTTTTAATTTATGAAGCATTTATTTTAACAACTGTTCATACAACTGCTTATGAACAATGAGGACCATACAGGATATGAGACAATATAAAATAAATATGTATATCACAGCTCTGTAAAAATAAAACACTCGCTCAAATTAACGCCCCAGCCTGCTGGTGTTGCGGTATCCATGACGATGTCCATTGTTGATAAGCAGATTTGTTCGGAGTTGGTTTTAGTACAAGGTCATACTCTGGGTGTGTCGTCCCATTACTCGCTGACTCCAGCAGCAATCAGGTTGAAGCAAGGGCGCCAAGCTGTAATGTCAGGCTTGCCGTCCATGAATTCAGGGAGCACACGGGCGATGGACTTGCCAAATTCCTTA…
comp2243258_c0_seq1	7.1e-29	330	sp|P02219|GLB1_TYLHE	Extracellular globin-1 OS=Tylorrhynchus heterochaetus PE=1 SV=1	2.1e-22	269	sp|P11740|GLB1_METSO	Extracellular globin-1 OS=Metaphire sieboldi PE=1 SV=1	8.1e-21	254	sp|P18202|GLB_TUBTU	Globin, extracellular monomeric OS=Tubifex tubifex PE=1 SV=1		+	+		++	Group_globins	CAGAGAAGGGGGGGGGTTGCTTTTGTGGTGTGATGTAAGTCACCTAAAGAGTATAAATATCAGGGTTTTGCCTCCGTCTTCAGCCATCTACACAGGTCTCGCCCCAATACTGGTAACTGGCTGATTCAAGATGAACGGAATAACAGTCTTCCTTATCCTGGCAATGGCCTCTGCCTCCTTGGCTGATGACTGCACCCAGTTGGACATGATCAAGGTCAAGCACCAGTGGGCTGAAGTGTATGGAGTGGAATCTAACAGGCAGGAGTTTGGTCTGGCAGTTTTTAAAAGATTCTTCGTGATCCACCCTGACCGATCTCTCTTCGTGAATGTCCATGGGGACAACGTCTACTCCCCCGAATTCCAGGCTCACGTTGCCCGAGTCTTAGCCGGTGTCGACAT…	>comp2243258_c0_seq1_Group_globins CAGAGAAGGGGGGGGGTTGCTTTTGTGGTGTGATGTAAGTCACCTAAAGAGTATAAATATCAGGGTTTTGCCTCCGTCTTCAGCCATCTACACAGGTCTCGCCCCAATACTGGTAACTGGCTGATTCAAGATGAACGGAATAACAGTCTTCCTTATCCTGGCAATGGCCTCTGCCTCCTTGGCTGATGACTGCACCCAGTTGGACATGATCAAGGTCAAGCACCAGTGGGCTGAAGTGTATGGAGTGGAATCTAACAGGCAGGAGTTTGGTCTGGCAGTTTTTAAAAGATTCTTCGTGATCCACCCTGACCGATCTCTCTTCGTGAATGTCCATGGGGACAACGTCTACTCCCCCGAATTCCAG…
comp2281676_c0_seq1	5.6e-61	633	sp|P09966|GLB2_TYLHE	Extracellular globin-2A OS=Tylorrhynchus heterochaetus PE=1 SV=1	1.8e-32	364	sp|P02218|GLB2_LUMTE	Extracellular globin-2 OS=Lumbricus terrestris PE=1 SV=2	1e-29	338	sp|P15469|GLB3_LAMSP	Giant hemoglobin AIII chain OS=Lamellibrachia sp. PE=1 SV=1		+	+		++	Group_globins	TTTTTTTTTTTAATAACAAAACCGCTTTGTGTAACCTTTATTCATGTACAGATATCTACAAGTGCTGAACGCTTTAGATTTGAAGAAAAAAAAAAGAAGATGAACAGCTTCAAGAACTTGTTTACAGCAGGCAGTGGCAGACGTGTTGACATATTGATGGTGGTAAAGCATTCGATCTTGTTGAGTGTCAACTTACGGGATAAATGGCGGAAAAGACAAGATGTTAAATGTAAGCCCCTTTATTTGGTGGTCAAAACAAGAATCTCAAAGTTGTTCATAAAGTGAGAATGGTAGTTCTTGTTTACAAGATCTTACAAGTTGAGAAAGATCTTGATGATACTGAAGATATATCTACCCTGAATCAAGAAGGTCTGGTGAAAAGCCAAGAAGAAACAGTTG…	>comp2281676_c0_seq1_Group_globins TTTTTTTTTTTAATAACAAAACCGCTTTGTGTAACCTTTATTCATGTACAGATATCTACAAGTGCTGAACGCTTTAGATTTGAAGAAAAAAAAAAGAAGATGAACAGCTTCAAGAACTTGTTTACAGCAGGCAGTGGCAGACGTGTTGACATATTGATGGTGGTAAAGCATTCGATCTTGTTGAGTGTCAACTTACGGGATAAATGGCGGAAAAGACAAGATGTTAAATGTAAGCCCCTTTATTTGGTGGTCAAAACAAGAATCTCAAAGTTGTTCATAAAGTGAGAATGGTAGTTCTTGTTTACAAGATCTTACAAGTTGAGAAAGATCTTGATGATACTGAAGATATATCTACCCTGAATCA…
comp2280591_c0_seq1	5.2e-58	605	sp|P13578|GLB3_TYLHE	Extracellular globin-2B OS=Tylorrhynchus heterochaetus PE=1 SV=1	6.1e-39	425	sp|Q7M418|GLBB2_OLIMA	Extracellular giant hemoglobin major globin subunit B2 OS=Oligobrachia mashikoi GN=ghbB2 PE=1 SV=2	6.5e-35	387	sp|P13579|GLB4_LUMTE	Extracellular globin-4 OS=Lumbricus terrestris PE=1 SV=1		+	+		++	Group_globins	TAGTCAATAGGCTGAGCTGAGGATCACTTGTGGGCTCTACATTTTCAGGATGTTGGTACTGGTTCTTTCCCTAGCTTTCTTGGGCTCTGCCCTGGCTGAAGACTGCTGCTCAGCTGCCGATAGGAAGACCGTGCTCCGCGACTGGCAGAGCGTCTGGTCCGCTGAGTTCACTGGCCGCAGGGTGGCAATTGGAACCGCTATCTTCGAAGAGCTTTTCGCCATCGACGCTGGTGCCAAAGATGTGTTCAAGAACGTCGCTGTGGACAAGCCAGAGTCCGCGGAATGGGCCGCTCACGTGATCAGGGTCATCAACGGCCTTGACCTTGCCATCAACCTGTTGGAGGACCCCAGGGCACTGAAGGAGGAGCTTCTGCATCTTGCCAAGCAGCACAGGGAGAG…	>comp2280591_c0_seq1_Group_globins TAGTCAATAGGCTGAGCTGAGGATCACTTGTGGGCTCTACATTTTCAGGATGTTGGTACTGGTTCTTTCCCTAGCTTTCTTGGGCTCTGCCCTGGCTGAAGACTGCTGCTCAGCTGCCGATAGGAAGACCGTGCTCCGCGACTGGCAGAGCGTCTGGTCCGCTGAGTTCACTGGCCGCAGGGTGGCAATTGGAACCGCTATCTTCGAAGAGCTTTTCGCCATCGACGCTGGTGCCAAAGATGTGTTCAAGAACGTCGCTGTGGACAAGCCAGAGTCCGCGGAATGGGCCGCTCACGTGATCAGGGTCATCAACGGCCTTGACCTTGCCATCAACCTGTTGGAGGACCCCAGGGCACTGAAGGAG…
comp2280694_c0_seq1	1.7e-52	553	sp|P02220|GLB4_TYLHE	Extracellular globin-2C OS=Tylorrhynchus heterochaetus PE=1 SV=1	2.5e-33	372	sp|P13578|GLB3_TYLHE	Extracellular globin-2B OS=Tylorrhynchus heterochaetus PE=1 SV=1	3.7e-32	361	sp|P13579|GLB4_LUMTE	Extracellular globin-4 OS=Lumbricus terrestris PE=1 SV=1	+	+	+		+++	Group_globins	ACATATATAAAGGAACTCTAGCTTCATTCGTCAGTCCACATTGACTGCTGTGTTGAACTCGGACCAGTGGAACAACTCAAGATGCTGGTACTGGCTGTATTTGTGGCTGCCCTGGGCCTGGCTGCGGCCGACCAATGTTGTTCCATTGAGGACCGTAATGAGGTCCAGGCTCTTTGGCAATCCATCTGGAGTGCCGAGAACACCGGAAAGAGAACCATCATCGGCCACCAGATCTTCGAGGAACTGTTTGACATAAACCCCGGCACCAAGGACCTTTTCAAGAGAGTCAACGTCGAGGACACCTCCAGCCCCGAATTCGAAGCTCACGTCCTGCGTGTGATGAACGGTCTAGACACTTTGATCGGAGTTCTGGATGACCCTGCCACCGGATATTCTCTG…	>comp2280694_c0_seq1_Group_globins ACATATATAAAGGAACTCTAGCTTCATTCGTCAGTCCACATTGACTGCTGTGTTGAACTCGGACCAGTGGAACAACTCAAGATGCTGGTACTGGCTGTATTTGTGGCTGCCCTGGGCCTGGCTGCGGCCGACCAATGTTGTTCCATTGAGGACCGTAATGAGGTCCAGGCTCTTTGGCAATCCATCTGGAGTGCCGAGAACACCGGAAAGAGAACCATCATCGGCCACCAGATCTTCGAGGAACTGTTTGACATAAACCCCGGCACCAAGGACCTTTTCAAGAGAGTCAACGTCGAGGACACCTCCAGCCCCGAATTCGAAGCTCACGTCCTGCGTGTGATGAACGGTCTAGACACTTTGATCG…
comp2251806_c0_seq1	1.9e-14	199	sp|O01812|FABP6_CAEEL	Fatty acid-binding protein homolog 6 OS=Caenorhabditis elegans GN=lbp-6 PE=1 SV=1	1.8e-12	181	sp|O01814|FABP5_CAEEL	Fatty acid-binding protein homolog 5 OS=Caenorhabditis elegans GN=lbp-5 PE=3 SV=1	3.1e-12	179	sp|O45035|FABP_SCHJA	Fatty acid-binding protein OS=Schistosoma japonicum PE=1 SV=1		+	+	+	+++	Group_Fatty_acid_binding_proteins	GGGTTTACGTCACAATTATAAGAGAAGGTCAGTACAAATTGAGCTAAATTGCAGACTGCAGCTGATTGAGTGAAAAGTTCGTCTGCTGAGCACCATTCCTTCATCATGCAGCTGCAATTGGCGGACCACAGAGACGACCCATGCAGCCAGCGGACAGCTGCAGATAAAAGAGAAAGCGGGCCCCAAGCTCAGGCACATGGGAGTAACAGGCAGGCCCAAGTTGACAGCTCACTCTGAAAACACCCAGCAACTGTACAGCAACTGAATTTGGAACATTGTTTTAAGAGTTAAAGATTGCAAAGACAGACATTAGCAATGGGTGATGGAATGGACAAGTTTATTGGAAGGTGGGATGTTACAGGCACTGAAAACATGGAAGAGATGCTGAAAGCTTTTGAT…	>comp2251806_c0_seq1_Group_Fatty_acid_binding_proteins GGGTTTACGTCACAATTATAAGAGAAGGTCAGTACAAATTGAGCTAAATTGCAGACTGCAGCTGATTGAGTGAAAAGTTCGTCTGCTGAGCACCATTCCTTCATCATGCAGCTGCAATTGGCGGACCACAGAGACGACCCATGCAGCCAGCGGACAGCTGCAGATAAAAGAGAAAGCGGGCCCCAAGCTCAGGCACATGGGAGTAACAGGCAGGCCCAAGTTGACAGCTCACTCTGAAAACACCCAGCAACTGTACAGCAACTGAATTTGGAACATTGTTTTAAGAGTTAAAGATTGCAAAGACAGACATTAGCAATGGGTGATGGAATGGACAAGTTTATTGG…
comp2265326_c0_seq3	5.7e-09	149	sp|Q91775|FABPI_XENLA	Fatty acid-binding protein, intestinal OS=Xenopus laevis GN=fabp2 PE=2 SV=2	0.00021	107	sp|P80856|FABPL_RHASA	Fatty acid-binding protein, liver OS=Rhamdia sapo GN=fabp1 PE=1 SV=2	0.0026	97	sp|P81400|FABP2_AMBME	Fatty acid-binding protein 2, liver OS=Ambystoma mexicanum PE=1 SV=2		+	+		++	Group_Fatty_acid_binding_proteins	GGGGGAATCTCGGCTATCTCGCGGGATGGCAATGGGATCGTCACAGGGCGAATGGAGTTTATTGGCAAATACAACTATGAAACATATTTTTCAATTTACCAGTGAATAGTCTGGAAACAAACTAAATACTTGGTTAGAAGGCAGTCCATTTATAGTTTGTGTTAGTCTGTTGTCCAGTCATCCATGTTGAACGATTATGAATATGTATGATAAAGTCACTTTATTGATAAAAAATTGTTGTCGTCATCAGATTCAGGCCTTTGCAAAAATTCGTGTTCCCTCTTCTGGTGATCCTGTATAAGCGTAGGTCTGGATGATTTTGCTTCCCACAAGTTGTCTCGTGATTTTGCTGACTTTACAATGTTGCTTGCTGTAGGTGTAGAGAACCAGTTTCTTGCC…	>comp2265326_c0_seq3_Group_Fatty_acid_binding_proteins GGGGGAATCTCGGCTATCTCGCGGGATGGCAATGGGATCGTCACAGGGCGAATGGAGTTTATTGGCAAATACAACTATGAAACATATTTTTCAATTTACCAGTGAATAGTCTGGAAACAAACTAAATACTTGGTTAGAAGGCAGTCCATTTATAGTTTGTGTTAGTCTGTTGTCCAGTCATCCATGTTGAACGATTATGAATATGTATGATAAAGTCACTTTATTGATAAAAAATTGTTGTCGTCATCAGATTCAGGCCTTTGCAAAAATTCGTGTTCCCTCTTCTGGTGATCCTGTATAAGCGTAGGTCTGGATGATTTTGCTTCCCACAAGTTGTCTCGTGA…
comp2257674_c0_seq1	7.6e-80	811	sp|O08914|FAAH1_MOUSE	Fatty-acid amide hydrolase 1 OS=Mus musculus GN=Faah PE=1 SV=1	1.8e-78	798	sp|P97612|FAAH1_RAT	Fatty-acid amide hydrolase 1 OS=Rattus norvegicus GN=Faah PE=1 SV=1	9e-77	782	sp|Q9TUI8|FAAH1_PIG	Fatty-acid amide hydrolase 1 OS=Sus scrofa GN=FAAH PE=1 SV=1	+	+			++	Candidate Fatty-acid amide hydrolase	GTGTTTTCAATCAGATCTTGTGTTTCGACGATATTTATAATTCTCAAATCTTTGAAACTTTGAAATTTTGACGACGGCTTCACGGCTGACATATTCACACTGACAACATGGCAATTGCTATTGAACAAAACACTGAGACCAGCCTCTTTTTCAGCCTTTTTGCTGTCCTGGGGGTCATAGCAACCATTGTCCTCTCCGTGGTAACGAAAAATTATTCCCTCCGGAAGAAGTATGACGGCATCCGGAAGAAACGACAACAGGAGGTGAAGAAGGCCATTGATGATCTGGAACAAAGAGTTTCGGGCTTTAAAGGTGACCACATTACTAAACTTACTGCACTGGAGATCCGAGAAGGCATAAAGCGCGGACGGTTCACAGCTACAGAAGTTTTGAAGGCCT…	>comp2257674_c0_seq1_Candidate Fatty-acid amide hydrolase GTGTTTTCAATCAGATCTTGTGTTTCGACGATATTTATAATTCTCAAATCTTTGAAACTTTGAAATTTTGACGACGGCTTCACGGCTGACATATTCACACTGACAACATGGCAATTGCTATTGAACAAAACACTGAGACCAGCCTCTTTTTCAGCCTTTTTGCTGTCCTGGGGGTCATAGCAACCATTGTCCTCTCCGTGGTAACGAAAAATTATTCCCTCCGGAAGAAGTATGACGGCATCCGGAAGAAACGACAACAGGAGGTGAAGAAGGCCATTGATGATCTGGAACAAAGAGTTTCGGGCTTTAAAGGTGACCACATTACTAAACTTACTGCACTG…
comp2269987_c0_seq2	9.3e-162	1584	sp|O61492|FLOT2_DROME	Flotillin-2 OS=Drosophila melanogaster GN=Flo2 PE=2 SV=3	3e-149	1466	sp|Q98TZ8|FLOT2_DANRE	Flotillin-2a OS=Danio rerio GN=flot2a PE=2 SV=2	4.4e-148	1455	sp|Q60634|FLOT2_MOUSE	Flotillin-2 OS=Mus musculus GN=Flot2 PE=1 SV=2	+				+		TGGGAGAAGAGTCGGCCATTTTGCGAAGAGAAACATTGTTTTCGAGGAGCCCAGCATAAAAATGGGAAATATTCACACAACTGGGCCTAATGAGGCCATGGTTATATCTGGTGGCTGCTGTGGAGCCACGGGCAAGAGGACCATCATCGGCGGATGGGGCTGGGCTTGGTGGTTTGTTACCGACGTGCAACAAATTTCGCTGGAGGTGATGACCTTGAACCCTGTGTGTGAACATGTGGAAACCTCGGAGGGTGTGCCCTTGACTGTCACTGGGGTCGCCCAGGTCAAGGTCATGGTAGAGCCGGAACTGCTCAACACGGCCTGCGAACAGTTCTTGGGAAAGCAGGTGCATCACATCGAGAGCGTCATCCTTCAAACCCTGGAAGGTCACTTGAGAGC…	>comp2269987_c0_seq2 TGGGAGAAGAGTCGGCCATTTTGCGAAGAGAAACATTGTTTTCGAGGAGCCCAGCATAAAAATGGGAAATATTCACACAACTGGGCCTAATGAGGCCATGGTTATATCTGGTGGCTGCTGTGGAGCCACGGGCAAGAGGACCATCATCGGCGGATGGGGCTGGGCTTGGTGGTTTGTTACCGACGTGCAACAAATTTCGCTGGAGGTGATGACCTTGAACCCTGTGTGTGAACATGTGGAAACCTCGGAGGGTGTGCCCTTGACTGTCACTGGGGTCGCCCAGGTCAAGGTCATGGTAGAGCCGGAACTGCTCAACACGGCCTGCGAACAGTTCTTGGGAAAGCAGGTGCATCACATCGAGAGCGTCATCCTTCAAAC…
comp2273190_c0_seq1	1.2e-170	1668	sp|A5PKH3|FAAA_BOVIN	Fumarylacetoacetase OS=Bos taurus GN=FAH PE=2 SV=1	4e-170	1663	sp|P16930|FAAA_HUMAN	Fumarylacetoacetase OS=Homo sapiens GN=FAH PE=1 SV=2	6e-167	1633	sp|P35505|FAAA_MOUSE	Fumarylacetoacetase OS=Mus musculus GN=Fah PE=1 SV=2	+		+		++		TGTTTTTTTTTTAAAATCTAAAATATTTTATTTTATGAATCTGACACGCTTGTTCGAATAGAAAATTTTCACACTTGGTACATGATTGTTCAATATTAGACATTAAATTATGCTCGAAAATAATAATAGACTTGGAAGAATACTTCATCGGTACATACAATTGCTTTCATATTAATGATAGTTATAACTTACTGACTAAACTTCATAATACCAGGGACACTGATAATACTTAATATTGCATAGAACATAATATCAACATATTAGCTGCCAAATGACTGAACCAAATTGACCAATAACAAAAAACCAACACAAGAAAATAAGCAGTATAACTAAACAGGTAGGAAGTTAACAATGGAATGCTAGCTGACAATTAATATAACTCACATGACACTTTCATAA…	>comp2273190_c0_seq1 TGTTTTTTTTTTAAAATCTAAAATATTTTATTTTATGAATCTGACACGCTTGTTCGAATAGAAAATTTTCACACTTGGTACATGATTGTTCAATATTAGACATTAAATTATGCTCGAAAATAATAATAGACTTGGAAGAATACTTCATCGGTACATACAATTGCTTTCATATTAATGATAGTTATAACTTACTGACTAAACTTCATAATACCAGGGACACTGATAATACTTAATATTGCATAGAACATAATATCAACATATTAGCTGCCAAATGACTGAACCAAATTGACCAATAACAAAAAACCAACACAAGAAAATAAGCAGTATAACTAAACAGGTAGGAAGTTAACAATGGAATGCTAGCTGACAATTAATATA…
comp2277977_c1_seq3	5.5e-143	1379	sp|Q8K0C9|GMDS_MOUSE	GDP-mannose 4,6 dehydratase OS=Mus musculus GN=Gmds PE=1 SV=1	7.1e-143	1378	sp|Q8K3X3|GMDS_CRIGR	GDP-mannose 4,6 dehydratase OS=Cricetulus griseus GN=GMDS PE=2 SV=1	1.1e-142	1378	sp|O60547|GMDS_HUMAN	GDP-mannose 4,6 dehydratase OS=Homo sapiens GN=GMDS PE=1 SV=1			+		+		GAAGTATCCAGGAAAGTGGCCCTAATTACTGGGATAACTGGCCAGGATGGATCCTACTTGGCGGAGTTCTTACTGGGAAAAGGATATGAGGTGCACGGCATCATCCGCAGAGCAAGTACCTTCAACACGTCCAGGATAGAGCATCTGTATGCGAACCCACAGTCTCACGAACAAGGAGCCATGATCCTTCACTATGGTGACATGTCGGACAGCTCAAGTTTAGTGAAGATCATTGCGGAAGTCAAACCTGTGGAAATCTATAACCTCGCTGCTCAGTCTCACGTTAAGGTATCCTTTGACTTGGCCGAGTACACAGCCAATGTGGACGCCCTGGGAGTTCTTCGCCTTCTTGACGCCATCCGAACCTGCGGTCTCGCTGACAAAGTCCGATTTTACCAA…	>comp2277977_c1_seq3 GAAGTATCCAGGAAAGTGGCCCTAATTACTGGGATAACTGGCCAGGATGGATCCTACTTGGCGGAGTTCTTACTGGGAAAAGGATATGAGGTGCACGGCATCATCCGCAGAGCAAGTACCTTCAACACGTCCAGGATAGAGCATCTGTATGCGAACCCACAGTCTCACGAACAAGGAGCCATGATCCTTCACTATGGTGACATGTCGGACAGCTCAAGTTTAGTGAAGATCATTGCGGAAGTCAAACCTGTGGAAATCTATAACCTCGCTGCTCAGTCTCACGTTAAGGTATCCTTTGACTTGGCCGAGTACACAGCCAATGTGGACGCCCTGGGAGTTCTTCGCCTTCTTGACGCCATCCGAACCTGCGGTCTCGCT…
comp2268906_c0_seq4	1.3e-109	1092	sp|Q8MPM1|GELS2_LUMTE	Gelsolin-like protein 2 OS=Lumbricus terrestris GN=gelsolin PE=1 SV=1	2.7e-107	1070	sp|Q7JQD3|GELS1_LUMTE	Gelsolin-like protein 1 OS=Lumbricus terrestris GN=AM PE=1 SV=1	4e-74	757	sp|Q24800|SEVE_ECHGR	Severin OS=Echinococcus granulosus GN=AG8 PE=2 SV=3	+				+		ATATATTTTTCATTTATAAACAACAAAGAAGCAGTTTACCAGAAAAAAGACAAGATTACAATCATTCGGCTACAAATGCAATTACTGTAGTGTATAATCATAACAGTTATAGTATCCTGTATCAAAGTACAAAATGCCATCAGTTCGTAAAGCCCAGTTCAGATTTAAAGTGACCCTCCTTCAAGTGATAGCTCAACAACTTTCATGTCATACCAGCGACATTTTGGTACTGCAAATTTAACAAATTTCACAAAATCCAATGACTTCACAAATCATACTTAACATACTTTAGATGTTATGAGGTACAATATGTAGTGACAACGATTTCAAGTTACAGCATCAACTTATATTGACCACTTTTGCACAATACAATCTTCTGAAAACGACGATCAATTTTCA…	>comp2268906_c0_seq4 ATATATTTTTCATTTATAAACAACAAAGAAGCAGTTTACCAGAAAAAAGACAAGATTACAATCATTCGGCTACAAATGCAATTACTGTAGTGTATAATCATAACAGTTATAGTATCCTGTATCAAAGTACAAAATGCCATCAGTTCGTAAAGCCCAGTTCAGATTTAAAGTGACCCTCCTTCAAGTGATAGCTCAACAACTTTCATGTCATACCAGCGACATTTTGGTACTGCAAATTTAACAAATTTCACAAAATCCAATGACTTCACAAATCATACTTAACATACTTTAGATGTTATGAGGTACAATATGTAGTGACAACGATTTCAAGTTACAGCATCAACTTATATTGACCACTTTTGCACAATACAATCTTCT…
comp2142003_c0_seq1	2.1e-68	703	sp|P18207|GLBL_TYLHE	Giant extracellular hemoglobin linker 1 chain OS=Tylorrhynchus heterochaetus PE=1 SV=1	2.9e-22	272	sp|P18208|GLBM_TYLHE	Giant extracellular hemoglobin linker 2 chain OS=Tylorrhynchus heterochaetus PE=1 SV=1	3.7e-12	180	sp|P16222|GLBL_LAMSP	Giant hemoglobin linker AV-1 chain OS=Lamellibrachia sp. PE=1 SV=1		+			+	Group_globins	GTACCAGGATAAAGGTTTTTAAATTTTTTTTTTTTTTTCAAATATAACAACAATTTATTGATAAATACACATCACCTGTCATAAATCATCATTCAACATAAAAAATCACACATAAAATGAGATCACAAGGTATTCCGCAGCTGCTTCTTGCCATCGTTAGTGTGGGAAGTGGCTTGTTCTTCTTGTCTGCCATTTTCTTCTGCTTTTTGTTAAAGGGACATTCTCATCCGCCATTCTGTATCCCATGTACTGCAAGTTGTTTTAAAAGCCTCCACCACAACTAATGGCTTGAAAGCAACTGTTATTTGCATTTAAATTTAATTACTAAACATTCATATTTCAATGAATGCATACAGCATGATATTCAATTCACAGTTCCTCAGATGCAGTATATAAAGT…	>comp2142003_c0_seq1_Group_globins GTACCAGGATAAAGGTTTTTAAATTTTTTTTTTTTTTTCAAATATAACAACAATTTATTGATAAATACACATCACCTGTCATAAATCATCATTCAACATAAAAAATCACACATAAAATGAGATCACAAGGTATTCCGCAGCTGCTTCTTGCCATCGTTAGTGTGGGAAGTGGCTTGTTCTTCTTGTCTGCCATTTTCTTCTGCTTTTTGTTAAAGGGACATTCTCATCCGCCATTCTGTATCCCATGTACTGCAAGTTGTTTTAAAAGCCTCCACCACAACTAATGGCTTGAAAGCAACTGTTATTTGCATTTAAATTTAATTACTAAACATTCATATTTCAATGAATGCATACAGCATGATAT…
comp2263950_c0_seq2	8.4e-90	905	sp|P18208|GLBM_TYLHE	Giant extracellular hemoglobin linker 2 chain OS=Tylorrhynchus heterochaetus PE=1 SV=1	2.2e-22	273	sp|P18207|GLBL_TYLHE	Giant extracellular hemoglobin linker 1 chain OS=Tylorrhynchus heterochaetus PE=1 SV=1	2.2e-18	237	sp|P16222|GLBL_LAMSP	Giant hemoglobin linker AV-1 chain OS=Lamellibrachia sp. PE=1 SV=1		+	+		++	Group_globins	CTGAAGTCATAACTCCTCCGAGTTAGCACCATGTCTGCACTGTGGCTGCTTCTGGGGGCTGCGGCCCTTTGCGCTATCGCCTCCGCGGATCATCATGCAGACTGTTCCTGCCCTGGAGGTCGCCAATGGGGTTCAGTTGCCGCCAAGACTGACGCCCAAGAGGCCCGAATCAACCGCCTTGCTGGAAAGGTCGAGGCCGTAGCCGAGAAGCTGCGCAAAGGAAAAAAGCGTGTCAAGAACTTCCTGGAAGAGTTCCAAGAGTTGGAATACCGTGTCAACGAGATTGAAGGCAATGGCTGTGAGACAAGACACTTCCAGTGTGGAGGAGACTTCCCCTACTGCATCTCAGACCTCTTGTGCTGTGATGGATCCAACGACTGCCCTAATGGAGCTGATGAA…	>comp2263950_c0_seq2_Group_globins CTGAAGTCATAACTCCTCCGAGTTAGCACCATGTCTGCACTGTGGCTGCTTCTGGGGGCTGCGGCCCTTTGCGCTATCGCCTCCGCGGATCATCATGCAGACTGTTCCTGCCCTGGAGGTCGCCAATGGGGTTCAGTTGCCGCCAAGACTGACGCCCAAGAGGCCCGAATCAACCGCCTTGCTGGAAAGGTCGAGGCCGTAGCCGAGAAGCTGCGCAAAGGAAAAAAGCGTGTCAAGAACTTCCTGGAAGAGTTCCAAGAGTTGGAATACCGTGTCAACGAGATTGAAGGCAATGGCTGTGAGACAAGACACTTCCAGTGTGGAGGAGACTTCCCCTACTGCATCTCAGACCTCTTGTGCTGTG…
comp2272182_c0_seq2	1.4e-196	1847	sp|P05370|G6PD_RAT	Glucose-6-phosphate 1-dehydrogenase OS=Rattus norvegicus GN=G6pdx PE=1 SV=3	4.8e-196	1842	sp|O55044|G6PD_CRIGR	Glucose-6-phosphate 1-dehydrogenase OS=Cricetulus griseus GN=G6PD PE=2 SV=3	6.1e-196	1841	sp|Q00612|G6PD1_MOUSE	Glucose-6-phosphate 1-dehydrogenase X OS=Mus musculus GN=G6pdx PE=1 SV=3		+			+		ATAGAAACCCCTTGGCGAAATCGGGGCAGCCGATGGGAGGGGCTTTGTGAAAGACTTTCTGATTCTCGTTTTTGACAGTTTTGGCTTGTTTGCAGTGGAGCCTACACCGAGAAGCTAGGGGCCAGCAAAAAAGTTGAAATGGCAGACAACAGGCAGAGAACGACCAGTATCACTCAAGACTTGCCTCAAGCAACTGCAAACATGGAAGCACAGCAGACAGGAGTGGAAATCTACAGGGAATCCCTTTCACAAATACACACTGAAGATGCTGGGGTTCCTTCTGTATTCGTTGTCATGGGTGCCTCTGGTGACTTGGCCAAAAAGAAGATCTACCCCACTCTTTGGTGGTTGTACAAAGATGAACTGCTTCCAAAACCAACGTGCTTCGTGGGCTATGCC…	>comp2272182_c0_seq2 ATAGAAACCCCTTGGCGAAATCGGGGCAGCCGATGGGAGGGGCTTTGTGAAAGACTTTCTGATTCTCGTTTTTGACAGTTTTGGCTTGTTTGCAGTGGAGCCTACACCGAGAAGCTAGGGGCCAGCAAAAAAGTTGAAATGGCAGACAACAGGCAGAGAACGACCAGTATCACTCAAGACTTGCCTCAAGCAACTGCAAACATGGAAGCACAGCAGACAGGAGTGGAAATCTACAGGGAATCCCTTTCACAAATACACACTGAAGATGCTGGGGTTCCTTCTGTATTCGTTGTCATGGGTGCCTCTGGTGACTTGGCCAAAAAGAAGATCTACCCCACTCTTTGGTGGTTGTACAAAGATGAACTGCTTCCAAAACCA…
comp2263691_c0_seq2	8.6e-72	735	sp|P14314|GLU2B_HUMAN	Glucosidase 2 subunit beta OS=Homo sapiens GN=PRKCSH PE=1 SV=2	9.9e-72	711	sp|O08795|GLU2B_MOUSE	Glucosidase 2 subunit beta OS=Mus musculus GN=Prkcsh PE=1 SV=1	1.4e-71	733	sp|Q28034|GLU2B_BOVIN	Glucosidase 2 subunit beta OS=Bos taurus GN=PRKCSH PE=2 SV=1		+	+		++	Candidate Glucosidase 2	CCAATGTTTTTGTTTTAATAGTTTCACATTTTATTCACACATGATTTTGCATATTGAAGATCATAGACATTACAAAATTTTACATTCACATGATGATTATAATATTGACCCACGGAAAAAGAAAAATTCCCCAATTAAACATTTTGTCATGTACATTTTAAACATTTTTACAGCCGCACTAAAGTATCGACATCAACAGCCTTCGGGAGACATAATATAAATGAATATAGATTATAGAATCACTGTGTGTGTATCCTAGCATTGAAGCACATTCAGGTGAATTAACAAAAAGACCAACCAAACTACATGGCACGCTATCAAAAGACATCAATTGATATGTCAACCGGACTCATTCCTCTTTCACTCCACAATTAATTAAGAAAGTTAATTCGAAGCAAT…	>comp2263691_c0_seq2_Candidate Glucosidase 2 CCAATGTTTTTGTTTTAATAGTTTCACATTTTATTCACACATGATTTTGCATATTGAAGATCATAGACATTACAAAATTTTACATTCACATGATGATTATAATATTGACCCACGGAAAAAGAAAAATTCCCCAATTAAACATTTTGTCATGTACATTTTAAACATTTTTACAGCCGCACTAAAGTATCGACATCAACAGCCTTCGGGAGACATAATATAAATGAATATAGATTATAGAATCACTGTGTGTGTATCCTAGCATTGAAGCACATTCAGGTGAATTAACAAAAAGACCAACCAAACTACATGGCACGCTATCAAAAGACATCAATTGATATGTCAACCGGACTCATT…
comp2269745_c1_seq1	4.5e-146	1436	sp|P15105|GLNA_MOUSE	Glutamine synthetase OS=Mus musculus GN=Glul PE=1 SV=6	6.6e-145	1425	sp|Q04831|GLNA_PANAR	Glutamine synthetase OS=Panulirus argus PE=2 SV=1	1.1e-144	1423	sp|P09606|GLNA_RAT	Glutamine synthetase OS=Rattus norvegicus GN=Glul PE=1 SV=3		+			+		TTAAATGGCCAGGCAGTACAGGACTCATTTGGTATAACTCAGCAGGTGACTGTAGGGTTTAGATCTGCAATACAGATTTCAAGATGTTTACCAACGCGTATACCGACAAGCAAGTTTTGCACAAATATCTGGAACTACCCCAGCCAGATGATAAAGTTCAGGTTATGTACATTTGGGTAGATGGTTCAGGAGAAGCACTGAGAGGAAAGACAAAAACTGTTGACTTTGAGCCAAAAGCTGCTGAGGAATGCCCCATTTGGAACTTTGACGGGTCTTCCACTGGCCAAGCAGAGGGCGCTAATAGTGATGTTTACCTCCACCCGGTGGCGCTTTATCGCGATCCATTCAGAGGTGGCAAAAACAAATTGTTACTTTGCGAGACTTATGATTATGAGAACA…	>comp2269745_c1_seq1 TTAAATGGCCAGGCAGTACAGGACTCATTTGGTATAACTCAGCAGGTGACTGTAGGGTTTAGATCTGCAATACAGATTTCAAGATGTTTACCAACGCGTATACCGACAAGCAAGTTTTGCACAAATATCTGGAACTACCCCAGCCAGATGATAAAGTTCAGGTTATGTACATTTGGGTAGATGGTTCAGGAGAAGCACTGAGAGGAAAGACAAAAACTGTTGACTTTGAGCCAAAAGCTGCTGAGGAATGCCCCATTTGGAACTTTGACGGGTCTTCCACTGGCCAAGCAGAGGGCGCTAATAGTGATGTTTACCTCCACCCGGTGGCGCTTTATCGCGATCCATTCAGAGGTGGCAAAAACAAATTGTTACTTTGCG…
comp2263277_c0_seq1	4.4e-123	1219	sp|Q04831|GLNA_PANAR	Glutamine synthetase OS=Panulirus argus PE=2 SV=1	2.5e-122	1212	sp|P20478|GLNA2_DROME	Glutamine synthetase 2 cytoplasmic OS=Drosophila melanogaster GN=Gs2 PE=2 SV=3	3.6e-121	1201	sp|P51121|GLNA_XENLA	Glutamine synthetase OS=Xenopus laevis GN=glul PE=2 SV=1		+			+		ATGGTTGTGCAGGTCTTCAGATCACATTGAAGAGGCCTGGCAGCAAAGAGTTCAATTTTCTTAACCTTTCGGGGAATTCACTAAAAGGAGCAAAATGGCTGTATCCATGAAGGACAATGCCTTTACGGAGAAGACCACTCTTTACGGCTACCTGGACCTTGAGCAACCAACCAGTGCGGTGCAAGTCACTTATGTGTGGATTGACGGCAGTTACGAAAATTTACGAAGCAAAACGAGAACTCTGGATTTCGTGCCTCAATCTGCTGAAGATTGTCCTATCTGGAACTATGATGGATCATCAACAGGTCAGGCGACTGGCTCCAATTCGGACGTTTATCTGCACCCAGTTGCGATGTTCCGAGATCCATTTTTATTGGGAAACAACCAAATTGTGCTTTG…	>comp2263277_c0_seq1 ATGGTTGTGCAGGTCTTCAGATCACATTGAAGAGGCCTGGCAGCAAAGAGTTCAATTTTCTTAACCTTTCGGGGAATTCACTAAAAGGAGCAAAATGGCTGTATCCATGAAGGACAATGCCTTTACGGAGAAGACCACTCTTTACGGCTACCTGGACCTTGAGCAACCAACCAGTGCGGTGCAAGTCACTTATGTGTGGATTGACGGCAGTTACGAAAATTTACGAAGCAAAACGAGAACTCTGGATTTCGTGCCTCAATCTGCTGAAGATTGTCCTATCTGGAACTATGATGGATCATCAACAGGTCAGGCGACTGGCTCCAATTCGGACGTTTATCTGCACCCAGTTGCGATGTTCCGAGATCCATTTTTATTGGG…
comp2279445_c0_seq1	9.8e-35	388	sp|Q99LJ6|GPX7_MOUSE	Glutathione peroxidase 7 OS=Mus musculus GN=Gpx7 PE=1 SV=1	1.6e-34	386	sp|Q9D7B7|GPX8_MOUSE	Probable glutathione peroxidase 8 OS=Mus musculus GN=Gpx8 PE=1 SV=1	3.6e-34	383	sp|Q5U583|GPX8B_XENLA	Probable glutathione peroxidase 8-B OS=Xenopus laevis GN=gpx8-b PE=2 SV=1	+	+			++	Candidate Glutathione peroxidase	GGTGATTCAGTTGCCGAATGGTGGTGGGGGCGAATCGACTGGTGAAGTTCGTCTCGCATGAGCTGTTTAAGGGGCTTCCACTGGCACGACGACTGGTTGGACAGGTTCCCAAGAAGCTTACAACACACATGTAGTCCAAGAGAGACACGGGAGCTGCAAGGGAGGTAGTTTAAGAGGGACATCATCATGTACAGGTGTGCAATTAGCATCTCCTTGGTGCTGTGTTTTGCTGTTGCCTCAGGAATCGAAGACAGAGCCAAACCGGCCAAGGGACCCAACTCAAGTCTCTACAACTTCAACTTCAACGATGCTTCTGGAAAGGCAATCGATTTCAAGGTGTTTCAGGGCAAGGTGATCCTGGTGGTCAACGTGGCCAGTGAGTGTGGCTTCACCGATGGC…	>comp2279445_c0_seq1_Candidate Glutathione peroxidase GGTGATTCAGTTGCCGAATGGTGGTGGGGGCGAATCGACTGGTGAAGTTCGTCTCGCATGAGCTGTTTAAGGGGCTTCCACTGGCACGACGACTGGTTGGACAGGTTCCCAAGAAGCTTACAACACACATGTAGTCCAAGAGAGACACGGGAGCTGCAAGGGAGGTAGTTTAAGAGGGACATCATCATGTACAGGTGTGCAATTAGCATCTCCTTGGTGCTGTGTTTTGCTGTTGCCTCAGGAATCGAAGACAGAGCCAAACCGGCCAAGGGACCCAACTCAAGTCTCTACAACTTCAACTTCAACGATGCTTCTGGAAAGGCAATCGATTTCAAGGTGTTTCAG…
comp2272087_c1_seq4	4.2e-15	200	sp|P46088|GST_NOTSL	Glutathione S-transferase OS=Nototodarus sloanii PE=1 SV=1	5e-12	171	sp|P18426|SCR11_NOTSL	S-crystallin SL11 OS=Nototodarus sloanii PE=2 SV=1	8.2e-12	169	sp|P46434|GST1_ONCVO	Glutathione S-transferase 1 (Fragment) OS=Onchocerca volvulus GN=GST1 PE=1 SV=1			+		+		GAACTTTTTTTCTCAGCAAGTTATATTTTTTATTAAACTCAACTCATGACATTATGTTAAATATTGATAGCATTGTGACATTTATTTACAGGTTCATTATGTACAATGTGAGTAAAACATAACATCAAATGCAGCAGTAGGTTAACTTTTTTTGATCCATTTATGTTTTAGTATTGTGTGGTTGGGCGGTTTTTGATCCATTCTGCTATTTTGGGGTCATCCTCCTCCACCCTTTTCATCAAGGCCTGCAACTTGGGAAATTTGCTCCAGTCGATGGCGATGTTTCCCAAATTCATAAAAGCCATAGAATTGGTGAAGCACAAGTCTGCTGCAGTCAAAGAATCTCCAATGAAGAAGCCATCTCCTCCCTTGTTCTGGACCAACATTCTCTCGAGGAAT…	>comp2272087_c1_seq4 GAACTTTTTTTCTCAGCAAGTTATATTTTTTATTAAACTCAACTCATGACATTATGTTAAATATTGATAGCATTGTGACATTTATTTACAGGTTCATTATGTACAATGTGAGTAAAACATAACATCAAATGCAGCAGTAGGTTAACTTTTTTTGATCCATTTATGTTTTAGTATTGTGTGGTTGGGCGGTTTTTGATCCATTCTGCTATTTTGGGGTCATCCTCCTCCACCCTTTTCATCAAGGCCTGCAACTTGGGAAATTTGCTCCAGTCGATGGCGATGTTTCCCAAATTCATAAAAGCCATAGAATTGGTGAAGCACAAGTCTGCTGCAGTCAAAGAATCTCCAATGAAGAAGCCATCTCCTCCCTTGTTCTGG…
comp2258349_c0_seq1	5.7e-24	313	sp|P10496|GRP2_PHAVU	Glycine-rich cell wall structural protein 1.8 OS=Phaseolus vulgaris PE=2 SV=1	1.7e-22	284	sp|P09789|GRP1_PETHY	Glycine-rich cell wall structural protein 1 OS=Petunia hybrida GN=GRP-1 PE=1 SV=1	6e-22	297	sp|P18165|LORI_MOUSE	Loricrin OS=Mus musculus GN=Lor PE=2 SV=2			+		+		AGTTTTTTTCAGTTTCTTATATTTATTCATGATGATACAAGATGAGCACAATATCAAGGACAAAACTGCATACAAAATTTCTCTAATGCAAAAACACCAACTGACAAGGAATGTCCTTCAATACGATTAAAATTTCAGGAAGTGTCTCCTAACGAGGGTTAAAAAACTTGCGTCTGCGAGACTTAACAAAATGAGTAAAATATGACGGATGAGACTATATACACACATGTACAAATGTAAGAGATAAATAAAAAAGTCCAAATAATGATCAACCATACGATACTACCATTTCTAGGAATGGCCATCAGGTATATATATGGCTAGATGAAGGTCCAGTGGACACATGTAAATGCTTTCATCTCCTTCGACTCAACAAAGGAAAAGTCCCAAGATATTTCA…	>comp2258349_c0_seq1 AGTTTTTTTCAGTTTCTTATATTTATTCATGATGATACAAGATGAGCACAATATCAAGGACAAAACTGCATACAAAATTTCTCTAATGCAAAAACACCAACTGACAAGGAATGTCCTTCAATACGATTAAAATTTCAGGAAGTGTCTCCTAACGAGGGTTAAAAAACTTGCGTCTGCGAGACTTAACAAAATGAGTAAAATATGACGGATGAGACTATATACACACATGTACAAATGTAAGAGATAAATAAAAAAGTCCAAATAATGATCAACCATACGATACTACCATTTCTAGGAATGGCCATCAGGTATATATATGGCTAGATGAAGGTCCAGTGGACACATGTAAATGCTTTCATCTCCTTCGACTCAACAAAG…
comp2261623_c0_seq1	2.7e-180	1759	sp|P51546|KGCY_HEDDI	Glycocyamine kinase OS=Hediste diversicolor PE=2 SV=1	3.3e-111	1107	sp|P11009|KCRS_CHICK	Creatine kinase S-type, mitochondrial OS=Gallus gallus GN=CKMT2 PE=1 SV=2	3.8e-110	1097	sp|Q9XSC6|KCRM_BOVIN	Creatine kinase M-type OS=Bos taurus GN=CKM PE=1 SV=2			+		+		TTGTCAGTCGTTCCAGACTCCTACCTAGGCGAACAGTTAACTCGTGGCAAACCTTTCAAAATGGGTTCCGCAATCCAGGACTTCTTTGTAAAGAACCGTGTCGGTCACTCTAAACCATGGGAGACCGGAAAGTTCAAGGCCGCGGACAACTTCCCTGACTTGAGCAAGCACAACAATGTGATGTCCAGTCAGTTGACCAAAGAACTGTACGAGAAGTACTGGGACAAAGTGACCCCCAACGGAGTCACCTTGGACAAGTGCATCCAGACCGGCGTCGACAACCCCGGCAACAAGTTCTATGGCAAGAAGACCGGATGCGTCTTCGGAGATGAGTTCTCCTACGAGACCTTCAAGGAGTTCTTTGACAAGGTCATCGAGGATATCCATCAGTTCAAGCCC…	>comp2261623_c0_seq1 TTGTCAGTCGTTCCAGACTCCTACCTAGGCGAACAGTTAACTCGTGGCAAACCTTTCAAAATGGGTTCCGCAATCCAGGACTTCTTTGTAAAGAACCGTGTCGGTCACTCTAAACCATGGGAGACCGGAAAGTTCAAGGCCGCGGACAACTTCCCTGACTTGAGCAAGCACAACAATGTGATGTCCAGTCAGTTGACCAAAGAACTGTACGAGAAGTACTGGGACAAAGTGACCCCCAACGGAGTCACCTTGGACAAGTGCATCCAGACCGGCGTCGACAACCCCGGCAACAAGTTCTATGGCAAGAAGACCGGATGCGTCTTCGGAGATGAGTTCTCCTACGAGACCTTCAAGGAGTTCTTTGACAAGGTCATCGAG…
comp2263394_c0_seq1	1e-84	857	sp|P13280|GLYG_RABIT	Glycogenin-1 OS=Oryctolagus cuniculus GN=GYG1 PE=1 SV=3	1.3e-84	856	sp|O08730|GLYG_RAT	Glycogenin-1 OS=Rattus norvegicus GN=Gyg1 PE=2 SV=4	4.4e-84	851	sp|Q9R062|GLYG_MOUSE	Glycogenin-1 OS=Mus musculus GN=Gyg1 PE=1 SV=3			+		+		GCTACTCCTCCTTCGATACCAACCAATCCGGGATCTATGTTGGGCTGGATACATTCCATGAAGATCTTCCACCATACTTGCAGGTATTGCTGATGGGTTCCTAAATTGTCGCTAGTTTGCACTTCGCCCGATGACGTGTTGAAGGCGTGATGCCAAGGCTTAGCTGCTCCGATGAAGTGAACGATCTTGACATTCTTGCCGTAGTATTTGAAGGCAGGCAAGTAACTGTAGAAGGCTTGGGAGACGCAGTTGTAGGTGAAGGGAAGATGTCTGGCAATGTCTTTGGTGGCCCAGTCGCTGAAGTACATGTTCAACAGGCCCTGATCACCACCGTCGAAGCTGCCTTGGCTGACAGCGAACTGTAACAGGGACTGGTAGGTCTCTTCTGAGGGGCGGAAA…	>comp2263394_c0_seq1 GCTACTCCTCCTTCGATACCAACCAATCCGGGATCTATGTTGGGCTGGATACATTCCATGAAGATCTTCCACCATACTTGCAGGTATTGCTGATGGGTTCCTAAATTGTCGCTAGTTTGCACTTCGCCCGATGACGTGTTGAAGGCGTGATGCCAAGGCTTAGCTGCTCCGATGAAGTGAACGATCTTGACATTCTTGCCGTAGTATTTGAAGGCAGGCAAGTAACTGTAGAAGGCTTGGGAGACGCAGTTGTAGGTGAAGGGAAGATGTCTGGCAATGTCTTTGGTGGCCCAGTCGCTGAAGTACATGTTCAACAGGCCCTGATCACCACCGTCGAAGCTGCCTTGGCTGACAGCGAACTGTAACAGGGACTGGTAG…
comp2256041_c0_seq1	6.9e-166	1623	sp|P38411|GNAQ_LYMST	Guanine nucleotide-binding protein G(q) subunit alpha OS=Lymnaea stagnalis PE=2 SV=1	1.4e-165	1620	sp|O15975|GNAQ_MIZYE	Guanine nucleotide-binding protein G(q) subunit alpha OS=Mizuhopecten yessoensis GN=SCGQA PE=2 SV=1	5.9e-160	1567	sp|P21278|GNA11_MOUSE	Guanine nucleotide-binding protein subunit alpha-11 OS=Mus musculus GN=Gna11 PE=1 SV=1		+			+		ACACATGGTTTCAATAAATATTTTATTCTTTCTGTTTTCAACACAAACCCTCCATTTATAAAGCTCAGAAAGCTATTAATAAAATACAAGGTACATCAATGTATTTGACACTTTTACTACCATTGAGAGAATTCCGTTAATTCCACAAAGATCAATATTGTGACCCCTATGATCATTCATTATGGGTATTCTAGTATTGTGTATTAAGAATAGTTGAATTTGGTGAGCGGCCTGATCCTGGGGACAGGCGAATGTCGCCCAGCCATGACTAGGATGTACACATGCAAGAAAACCCGTGAGTAACGTCAACCTCTCACTTGGATTCAATAGCTGGAGTCTGGGACTAGGGATATATGGCGCCAGGCACCGAGCAACACACACCTTTGTGGAATTGAAGAA…	>comp2256041_c0_seq1 ACACATGGTTTCAATAAATATTTTATTCTTTCTGTTTTCAACACAAACCCTCCATTTATAAAGCTCAGAAAGCTATTAATAAAATACAAGGTACATCAATGTATTTGACACTTTTACTACCATTGAGAGAATTCCGTTAATTCCACAAAGATCAATATTGTGACCCCTATGATCATTCATTATGGGTATTCTAGTATTGTGTATTAAGAATAGTTGAATTTGGTGAGCGGCCTGATCCTGGGGACAGGCGAATGTCGCCCAGCCATGACTAGGATGTACACATGCAAGAAAACCCGTGAGTAACGTCAACCTCTCACTTGGATTCAATAGCTGGAGTCTGGGACTAGGGATATATGGCGCCAGGCACCGAGCAACACA…
comp2276523_c0_seq2	3.2e-177	1730	sp|Q5GIS3|GBB_PINFU	Guanine nucleotide-binding protein subunit beta OS=Pinctada fucata PE=1 SV=1	1.8e-174	1704	sp|P23232|GBB_LOLFO	Guanine nucleotide-binding protein subunit beta OS=Loligo forbesi PE=2 SV=1	1.9e-172	1685	sp|Q08706|GBB_LYMST	Guanine nucleotide-binding protein subunit beta OS=Lymnaea stagnalis PE=2 SV=1		+			+		TAGCTTCTCCCCTGTTAATCCACTTACTATGGAATGGGTGGAGGTGCGCCCTGGCGTCACAGGACCTATCATCAACTAATGCCGTATCCGAGCTTTCTTTAGCTGCTCCGTCGAAACAATCAGGATTAACTTGTTGCATCGGTATTGCCGCTATTGCGACTATTTGCCTGTCTCCTAACTGTGAAGTGTCTCGGATATTAGGTGGTGTTTTGTCAATTATCTGTCATCCGAAGTTGAAAGTATATGGTTTTTTTCTTTTTACCTAATTCATCATGAGTGAATTAGAGCAGCTGCGCCAAGAAGCGGAGCAACTAAAAAGTCAGATTAGGGAAGCGCGAAAAGCAGCTGCAGACACAGTACTTGCCCAAGCCGCAGCCAATGTCGAACCCGTGGGAAGGA…	>comp2276523_c0_seq2 TAGCTTCTCCCCTGTTAATCCACTTACTATGGAATGGGTGGAGGTGCGCCCTGGCGTCACAGGACCTATCATCAACTAATGCCGTATCCGAGCTTTCTTTAGCTGCTCCGTCGAAACAATCAGGATTAACTTGTTGCATCGGTATTGCCGCTATTGCGACTATTTGCCTGTCTCCTAACTGTGAAGTGTCTCGGATATTAGGTGGTGTTTTGTCAATTATCTGTCATCCGAAGTTGAAAGTATATGGTTTTTTTCTTTTTACCTAATTCATCATGAGTGAATTAGAGCAGCTGCGCCAAGAAGCGGAGCAACTAAAAAGTCAGATTAGGGAAGCGCGAAAAGCAGCTGCAGACACAGTACTTGCCCAAGCCGCAGCCA…
comp2276272_c0_seq2	2.5e-177	1731	sp|P34932|HSP74_HUMAN	Heat shock 70 kDa protein 4 OS=Homo sapiens GN=HSPA4 PE=1 SV=4	5.1e-177	1728	sp|Q61316|HSP74_MOUSE	Heat shock 70 kDa protein 4 OS=Mus musculus GN=Hspa4 PE=1 SV=1	8.4e-177	1726	sp|Q2TFN9|HSP74_CANLF	Heat shock 70 kDa protein 4 OS=Canis lupus familiaris GN=HSPA4 PE=1 SV=1		+			+		CATTTTTTTTGAGGTTTCTATTGCTGTCAGTAACTTTATTGAGTACCGAAGCATACTGATATTATGATTGGATGTTTTACTCATGACCATAAAAAATACACAGGCTATTAATGAAATACATGATAAAGCGAGCCGCAGATGGGAATCACTATGGGAGCAATTAATGAACTTGTTGGTCCACGCCTGCATGCGCTCAAATGCAGAGATGCATGTACATTGTAGTGAAGTGGTCATAAACGATTCACATTTTTGGGGAGTCGTGCAATATACTCGATATAACAAGCAAATGTGTCGTCAAAAGAGGAACATCTTACAAAACGGACTGCGGCGGCTTTACTTGAAGCAATCAAAGAAAATGCAAAAATATCATTGAAATCATATGATGTCGTAAATAAAACT…	>comp2276272_c0_seq2 CATTTTTTTTGAGGTTTCTATTGCTGTCAGTAACTTTATTGAGTACCGAAGCATACTGATATTATGATTGGATGTTTTACTCATGACCATAAAAAATACACAGGCTATTAATGAAATACATGATAAAGCGAGCCGCAGATGGGAATCACTATGGGAGCAATTAATGAACTTGTTGGTCCACGCCTGCATGCGCTCAAATGCAGAGATGCATGTACATTGTAGTGAAGTGGTCATAAACGATTCACATTTTTGGGGAGTCGTGCAATATACTCGATATAACAAGCAAATGTGTCGTCAAAAGAGGAACATCTTACAAAACGGACTGCGGCGGCTTTACTTGAAGCAATCAAAGAAAATGCAAAAATATCATTGAAATCA…
comp2265923_c0_seq1	0	3067	sp|P07900|HS90A_HUMAN	Heat shock protein HSP 90-alpha OS=Homo sapiens GN=HSP90AA1 PE=1 SV=5	0	3066	sp|Q4R4P1|HS90A_MACFA	Heat shock protein HSP 90-alpha OS=Macaca fascicularis GN=HSP90AA1 PE=2 SV=3	0	3066	sp|O02705|HS90A_PIG	Heat shock protein HSP 90-alpha OS=Sus scrofa GN=HSP90AA1 PE=2 SV=3		+			+		GTTTTTTTTTTTTTTATATTTTACAACATTTAATTCACAATCACAACGTGGAACGTAATCACTGAATCAGCATGCGGTATTTGTTACAATGTACATAGGAGTTTTAAAGGGTTTTGCTTTTTTTTTGTAAGTTTTTTGTAACTTAAATTGACTACTTTTAGAAAAGTGTAAAACAATTGTCCAGCAAAGTAAAACGACCATAATATACAGTCTGCAAGGCTTAAGTTCTACGCAAAGATGGAACAGTTTAATCGACCTCCTCCATTCTGGAAGCATCGTCCTCGTCTCCTGCCTCAAGGGGTGGCATTTCCTCGGCAGCTGCTTCTGGCTCGGGTGCCTCTTCCTCATCAACTCCGAGACCAAGCTTGATCATGCGGTGGATGCGGTTGGCGTGGATCT…	>comp2265923_c0_seq1 GTTTTTTTTTTTTTTATATTTTACAACATTTAATTCACAATCACAACGTGGAACGTAATCACTGAATCAGCATGCGGTATTTGTTACAATGTACATAGGAGTTTTAAAGGGTTTTGCTTTTTTTTTGTAAGTTTTTTGTAACTTAAATTGACTACTTTTAGAAAAGTGTAAAACAATTGTCCAGCAAAGTAAAACGACCATAATATACAGTCTGCAAGGCTTAAGTTCTACGCAAAGATGGAACAGTTTAATCGACCTCCTCCATTCTGGAAGCATCGTCCTCGTCTCCTGCCTCAAGGGGTGGCATTTCCTCGGCAGCTGCTTCTGGCTCGGGTGCCTCTTCCTCATCAACTCCGAGACCAAGCTTGATCATGCGGT…
comp2221095_c0_seq1	0.9	91	sp|P46085|HA70_CLOBO	Hemagglutinin components HA-22/23/53 OS=Clostridium botulinum GN=HA-70 PE=1 SV=1										+			+		TAAGCATCAGTTGAACGGATCCAAATGCACTTTGAGTCTCATAATGGCTCCATCATACTTGATTTTGTGTATTTCAGCTTTCATGATAAGTGTCACCCAAGGAAATCAAGAAGTCTTTCAAGATGTTGCCAGGTTGTGTGATAAGTTTTGTGTGGTGAAATCCAATACCAATTGTGGAGGGAAGGAGAAAGCAATACCAAAACCAGACATCTATGTTTCTATGGACAGTATCACTGGTACCAAAGTACCTGCTACCGGATTGTCGGATGTAACTGTCAGAGGATCACCAAGACCATCCATAGTCTCAGGAAAGGTGGGAAATGCCATCAGACTGGAGAACACCCAGACCCTGGATAACAAGTTCATAGATCTGGGATACCTCAGGGGAAGATGTGCAGA…	>comp2221095_c0_seq1 TAAGCATCAGTTGAACGGATCCAAATGCACTTTGAGTCTCATAATGGCTCCATCATACTTGATTTTGTGTATTTCAGCTTTCATGATAAGTGTCACCCAAGGAAATCAAGAAGTCTTTCAAGATGTTGCCAGGTTGTGTGATAAGTTTTGTGTGGTGAAATCCAATACCAATTGTGGAGGGAAGGAGAAAGCAATACCAAAACCAGACATCTATGTTTCTATGGACAGTATCACTGGTACCAAAGTACCTGCTACCGGATTGTCGGATGTAACTGTCAGAGGATCACCAAGACCATCCATAGTCTCAGGAAAGGTGGGAAATGCCATCAGACTGGAGAACACCCAGACCCTGGATAACAAGTTCATAGATCTGGGATA…
comp2271594_c0_seq8	0.00016	115	sp|P97825|HN1_MOUSE	Hematological and neurological expressed 1 protein OS=Mus musculus GN=Hn1 PE=1 SV=3	0.00042	111	sp|Q6AXU6|HN1_RAT	Hematological and neurological expressed 1 protein OS=Rattus norvegicus GN=Hn1 PE=1 SV=3	0.0057	100	sp|Q9UK76|HN1_HUMAN	Hematological and neurological expressed 1 protein OS=Homo sapiens GN=HN1 PE=1 SV=3				+	+		TTGGTTTTGAACGTGCGAGAGCGGGTCAGGAAGTCTGAGTAGAAACTGGAAGGAGCCTTTTCTGAGTAATTTAGGCATTTTAACAGCATAATGACGACCACCGACGTATTCCAGGGAGTAGGGGCCAAGAACTCATCAAGAGTACTCGCCGCTCCGGGAGGAAAGAGCTCAATTTGTTTTGGTAACCCCGATGACTCGCCCCCTGCCCCAGCAAGAAGATCCACAGACAACGGAGCCGCTCAGGACAGCCCTGCTGGTCAGGGAACCCCTGCCCCCAACGCCCACAGCCATTCGTCTATTTTTGGAGAGGGGACGGACGCTGAGACACCCGATAGTCTTAAGGTGAAAAAGGTGTCTAAAGGATCAGGCCAGTACAACCCCAATTCAGGAGATGGACAC…	>comp2271594_c0_seq8 TTGGTTTTGAACGTGCGAGAGCGGGTCAGGAAGTCTGAGTAGAAACTGGAAGGAGCCTTTTCTGAGTAATTTAGGCATTTTAACAGCATAATGACGACCACCGACGTATTCCAGGGAGTAGGGGCCAAGAACTCATCAAGAGTACTCGCCGCTCCGGGAGGAAAGAGCTCAATTTGTTTTGGTAACCCCGATGACTCGCCCCCTGCCCCAGCAAGAAGATCCACAGACAACGGAGCCGCTCAGGACAGCCCTGCTGGTCAGGGAACCCCTGCCCCCAACGCCCACAGCCATTCGTCTATTTTTGGAGAGGGGACGGACGCTGAGACACCCGATAGTCTTAAGGTGAAAAAGGTGTCTAAAGGATCAGGCCAGTACAAC…
comp2254520_c0_seq1	1.6e-95	959	sp|P48810|RB87F_DROME	Heterogeneous nuclear ribonucleoprotein 87F OS=Drosophila melanogaster GN=Hrb87F PE=2 SV=2	3.3e-95	956	sp|P09651|ROA1_HUMAN	Heterogeneous nuclear ribonucleoprotein A1 OS=Homo sapiens GN=HNRNPA1 PE=1 SV=5	7.9e-94	943	sp|P51991|ROA3_HUMAN	Heterogeneous nuclear ribonucleoprotein A3 OS=Homo sapiens GN=HNRNPA3 PE=1 SV=2	+				+		CCGGGTTCTCACTCTTCTCTCCGAAGACGGTTTGAGCAGGAACTACTCTTGGTGTCTGGTCAGGGGTGGTGTTATTTATATATAGATTTTAAGGGGTTTTAGTCAAGATTGATTCTTACAAGATGCCGGTTGTCCGTTCTGAGGCTGATGAGTACCGCAAGCTCTTCATTGGTGGTCTCAGCTACGAGACAACTGAAGACTCACTTCGCGGACACTTCGAGCAATGGGGAGAGATCGTCGACTGCGTCGTCATGAAGGACCGCAACACCAAGCGGTCGAGGGGATTCGGCTTCATCACCTACAAGGAACCCCACATGGTAGACGACGCCCAGTCAGCTAGACCCCACAAAATCGACAACCGAGAGGTAGAATCAAAGAGGGCCGTCCCCCGAGAATCTG…	>comp2254520_c0_seq1 CCGGGTTCTCACTCTTCTCTCCGAAGACGGTTTGAGCAGGAACTACTCTTGGTGTCTGGTCAGGGGTGGTGTTATTTATATATAGATTTTAAGGGGTTTTAGTCAAGATTGATTCTTACAAGATGCCGGTTGTCCGTTCTGAGGCTGATGAGTACCGCAAGCTCTTCATTGGTGGTCTCAGCTACGAGACAACTGAAGACTCACTTCGCGGACACTTCGAGCAATGGGGAGAGATCGTCGACTGCGTCGTCATGAAGGACCGCAACACCAAGCGGTCGAGGGGATTCGGCTTCATCACCTACAAGGAACCCCACATGGTAGACGACGCCCAGTCAGCTAGACCCCACAAAATCGACAACCGAGAGGTAGAATCAAAGA…
comp2266507_c0_seq10	6e-96	963	sp|P09651|ROA1_HUMAN	Heterogeneous nuclear ribonucleoprotein A1 OS=Homo sapiens GN=HNRNPA1 PE=1 SV=5	6.8e-95	953	sp|Q8BG05|ROA3_MOUSE	Heterogeneous nuclear ribonucleoprotein A3 OS=Mus musculus GN=Hnrnpa3 PE=1 SV=1	6.8e-95	953	sp|Q6URK4|ROA3_RAT	Heterogeneous nuclear ribonucleoprotein A3 OS=Rattus norvegicus GN=Hnrnpa3 PE=1 SV=1	+				+		TCAATTACGTGACTTGTCTCTGTCGGCGTGCATTCAAGATGATGAAAGAGGACAAACCAGAATCGGAGCAGTACCGAAAACTGTTCATCGGCGGTCTCAGTTACGAGACAACCGAGGAGAGTTTGAAGTCATACTTCGAGAAATGGGGAGAGATCGTGGACTGCGTGGTCATGCGAGACCCCAACACCAAGAGGTCGAGGGGTTTCGGCTTCATCACTTACAAGACCGCTAGCATGGTTGACGAGGCTCAAGATGCACGTCCCCACACCATCGACAACAGAACAGTCGAGCCCAAGAGGGCCGTCCCCAGAGAGGACTCGGGCAAACCAGAAGCCCACCTGACGATCAAAAAGATCTTCGTCGGAGGAATCAAGGAAGACACGGAAGAGGGCCAGTTGA…	>comp2266507_c0_seq10 TCAATTACGTGACTTGTCTCTGTCGGCGTGCATTCAAGATGATGAAAGAGGACAAACCAGAATCGGAGCAGTACCGAAAACTGTTCATCGGCGGTCTCAGTTACGAGACAACCGAGGAGAGTTTGAAGTCATACTTCGAGAAATGGGGAGAGATCGTGGACTGCGTGGTCATGCGAGACCCCAACACCAAGAGGTCGAGGGGTTTCGGCTTCATCACTTACAAGACCGCTAGCATGGTTGACGAGGCTCAAGATGCACGTCCCCACACCATCGACAACAGAACAGTCGAGCCCAAGAGGGCCGTCCCCAGAGAGGACTCGGGCAAACCAGAAGCCCACCTGACGATCAAAAAGATCTTCGTCGGAGGAATCAAGGAA…
comp2273204_c0_seq26	1.3e-148	925	sp|Q9BUJ2|HNRL1_HUMAN	Heterogeneous nuclear ribonucleoprotein U-like protein 1 OS=Homo sapiens GN=HNRNPUL1 PE=1 SV=2	3.5e-148	926	sp|Q8VDM6|HNRL1_MOUSE	Heterogeneous nuclear ribonucleoprotein U-like protein 1 OS=Mus musculus GN=Hnrnpul1 PE=1 SV=1	4.5e-132	803	sp|Q00839|HNRPU_HUMAN	Heterogeneous nuclear ribonucleoprotein U OS=Homo sapiens GN=HNRNPU PE=1 SV=6			+		+		CGGGTTATTGACTATAGGACTAAAAGATATGAGCCACAATTAGTGGTTATCAAGGACAGCAATGTTGAAAGAACCCACAAATATAAATATCTAGGGTTGGTTATGGATGATCAGCTATGTTGGAAGGACCATTTTGAACATGTTAACAAAAAGCTCAACCCCAGATTACGCAAAGACGCCATATTGAATTTTGCAAGGAGGAAGAACAAACAGACAGCAAATATGAGCGACATTGACCCCAAGAAGTTGAAAGTAGCCGAGTTGCGCGAGGAGCTGAAGACGCGTGGTTTGGACACAAAAGGAAATAAGGCCCAGTTGGTGAAACGCTTGGAAAAGGCCATTACTGCTGAGAGCGGTGGAGATGTTGGAGACCTTGATGACAGCCAAGATGTCAGTGCA…	>comp2273204_c0_seq26 CGGGTTATTGACTATAGGACTAAAAGATATGAGCCACAATTAGTGGTTATCAAGGACAGCAATGTTGAAAGAACCCACAAATATAAATATCTAGGGTTGGTTATGGATGATCAGCTATGTTGGAAGGACCATTTTGAACATGTTAACAAAAAGCTCAACCCCAGATTACGCAAAGACGCCATATTGAATTTTGCAAGGAGGAAGAACAAACAGACAGCAAATATGAGCGACATTGACCCCAAGAAGTTGAAAGTAGCCGAGTTGCGCGAGGAGCTGAAGACGCGTGGTTTGGACACAAAAGGAAATAAGGCCCAGTTGGTGAAACGCTTGGAAAAGGCCATTACTGCTGAGAGCGGTGGAGATGTTGGAGACCTTGA…
comp2278133_c0_seq3	1.7e-110	1112	sp|Q9NFT7|HXK2_DROME	Hexokinase type 2 OS=Drosophila melanogaster GN=Hex-t2 PE=2 SV=4	1.1e-105	1067	sp|P52789|HXK2_HUMAN	Hexokinase-2 OS=Homo sapiens GN=HK2 PE=1 SV=2	3.1e-103	1044	sp|Q1W674|HXK2_PIG	Hexokinase-2 OS=Sus scrofa GN=HK2 PE=2 SV=1		+			+		AGATTTTTCAGGTTAACAGCATTTCATTTCATTAAATAAGATGCATTAGAAAATAACATTGTTAATTTAAAGCAAAAAACAACTATATACAACCAATATTCATAACTGAGTTACAAGCTAATGTAACTACATAATAAGTCTATAATTAATAAATGGAACAGCCTATAATTCAAATAACAAATGTATATGATGCCATGTTGACTAAATAAAATAGTTCACATATTCAGCGGACTGAGCGGATAACGATTTAGGTCAGTATTATACTGGATAGCAAAACATTTAGCCTTCTTTAAAGTAATGTATAATATTATATAATACAATATAATCAATATTGTCAATAGATTGTTCTATTTCAAATATAATATGCAAATCAGTTACATCACAAATAACACAGAAATC…	>comp2278133_c0_seq3 AGATTTTTCAGGTTAACAGCATTTCATTTCATTAAATAAGATGCATTAGAAAATAACATTGTTAATTTAAAGCAAAAAACAACTATATACAACCAATATTCATAACTGAGTTACAAGCTAATGTAACTACATAATAAGTCTATAATTAATAAATGGAACAGCCTATAATTCAAATAACAAATGTATATGATGCCATGTTGACTAAATAAAATAGTTCACATATTCAGCGGACTGAGCGGATAACGATTTAGGTCAGTATTATACTGGATAGCAAAACATTTAGCCTTCTTTAAAGTAATGTATAATATTATATAATACAATATAATCAATATTGTCAATAGATTGTTCTATTTCAAATATAATATGCAAATCAGTTAC…
comp2207063_c0_seq1	2.2e-43	467	sp|P80912|HINT1_RABIT	Histidine triad nucleotide-binding protein 1 OS=Oryctolagus cuniculus GN=HINT1 PE=1 SV=2	3.5e-43	465	sp|P62958|HINT1_BOVIN	Histidine triad nucleotide-binding protein 1 OS=Bos taurus GN=HINT1 PE=1 SV=2	4e-42	455	sp|P70349|HINT1_MOUSE	Histidine triad nucleotide-binding protein 1 OS=Mus musculus GN=Hint1 PE=1 SV=3		+			+		TAAAATGGCGGACGAGGTGGCCAAGGCACAGAGTGCAGGGGCTGGTGGTGATACCATATTTGGCAAGATAATTCGCAAAGAAATCCCTGCTGACATAGTTTACGAAGATGACCAGTGCCTCGCTTTCAAGGATATCAACCCCCAGGCGCCTGTCCATTGTTTAGTGATTCCCAAGAAAGCCATTTCTCAACACGCCAAGTCCACTGATGCTGATGAACAGCTGCTGGGACATCTTCTAGTTGCTGCTCGCAAAGTTGCCGAACAGCAGGGTATTGCTGAGTCAGGATATCGCCTCGTCATCAATGATGGGAAGAACGGTGCACAATCTGTGTACCATCTCCATGTTCACGTTTTCGGCGGAAGACAAATGGGCTGGCCTCCAGGATAAAGAATTAGGGA…	>comp2207063_c0_seq1 TAAAATGGCGGACGAGGTGGCCAAGGCACAGAGTGCAGGGGCTGGTGGTGATACCATATTTGGCAAGATAATTCGCAAAGAAATCCCTGCTGACATAGTTTACGAAGATGACCAGTGCCTCGCTTTCAAGGATATCAACCCCCAGGCGCCTGTCCATTGTTTAGTGATTCCCAAGAAAGCCATTTCTCAACACGCCAAGTCCACTGATGCTGATGAACAGCTGCTGGGACATCTTCTAGTTGCTGCTCGCAAAGTTGCCGAACAGCAGGGTATTGCTGAGTCAGGATATCGCCTCGTCATCAATGATGGGAAGAACGGTGCACAATCTGTGTACCATCTCCATGTTCACGTTTTCGGCGGAAGACAAATGGGCTGGCC…
comp2222959_c0_seq1	1.6e-40	440	sp|P15870|H1D_STRPU	Histone H1-delta OS=Strongylocentrotus purpuratus PE=3 SV=1	4.4e-36	398	sp|P02258|H5_ANSAN	Histone H5 OS=Anser anser anser PE=1 SV=1	3.1e-35	390	sp|P06350|H1_ONCMY	Histone H1 OS=Oncorhynchus mykiss PE=1 SV=2		+	+		++	Group_Histones	GTTTATATTTCAATATTTAATTCAGATTCTTTTTCCGACATGTACATAAAAACAAGACAAAACAAAAACAAATTCTCATAAAAATAAGAATACTTGGCCGGTGTCCTTAATATAAGCACACTCCATAAAAATATGTACATTGATGTGATGAACCATGAATGTGTTGATAACATTTTGAACATGAACGATGTGACGTAACAAAAATTATGGAAATGCAATGTGTGATGCTCAAACCATAGGCCTATAGTTTGAGTACTTAGTTGGAAAACAAGTTTTCCAGAGACAGTTTTTGTTAATGAGTCTATTTCTTTGCTTTTTTAGCTGCTGCCTTTTTAGGTTTCGCTGCCTTGGGTTTTTTTGCTGCTGCCTTTTTGGGCGTCTTGGGTTTCTTTGCGGCTG…	>comp2222959_c0_seq1_Group_Histones GTTTATATTTCAATATTTAATTCAGATTCTTTTTCCGACATGTACATAAAAACAAGACAAAACAAAAACAAATTCTCATAAAAATAAGAATACTTGGCCGGTGTCCTTAATATAAGCACACTCCATAAAAATATGTACATTGATGTGATGAACCATGAATGTGTTGATAACATTTTGAACATGAACGATGTGACGTAACAAAAATTATGGAAATGCAATGTGTGATGCTCAAACCATAGGCCTATAGTTTGAGTACTTAGTTGGAAAACAAGTTTTCCAGAGACAGTTTTTGTTAATGAGTCTATTTCTTTGCTTTTTTAGCTGCTGCCTTTTTAGGTTTCGCTGCCTTGGGTTTTTTTGCTG…
comp1965369_c0_seq1_contamination	3.5e-59	616	sp|P84052|H2A_DROER	Histone H2A OS=Drosophila erecta GN=His2A PE=3 SV=2	3.5e-59	616	sp|P84053|H2A_DROHY	Histone H2A OS=Drosophila hydei GN=His2A PE=3 SV=2	3.5e-59	616	sp|P84051|H2A_DROME	Histone H2A OS=Drosophila melanogaster GN=His2A PE=1 SV=2		+	+		++	Group_Histones	CACCCCTAACTGAATGCGCAGGCAAACGGAAAAGTATAAATATTTCGCTGTCTGGGTTAGGCGAGCATTCGTGTTCCGTGTGTAAAGTGAACTAAGTGAAATAAACGCAAAGCAAAATGTCTGGACGTGGAAAAGGTGGCAAAGTGAAGGGAAAGGCAAAGTCCCGCTCAAACCGTGCCGGTCTTCAATTCCCTGTGGGCCGTATTCACCGTTTGCTCCGGAAGGGAAACTACGCAGAGCGTGTTGGTGCAGGCGCTCCAGTTTACCTAGCTGCCGTAATGGAATATCTGGCCGCTGAGGTTCTCGAGTTGGCTGGCAATGCTGCTCGTGACAACAAGAAGACTAGAATTATTCCGCGTCATCTGCAACTGGCCATCCGCAACGACGAGGAGTTAAACA…	>comp1965369_c0_seq1_contamination_Group_Histones CACCCCTAACTGAATGCGCAGGCAAACGGAAAAGTATAAATATTTCGCTGTCTGGGTTAGGCGAGCATTCGTGTTCCGTGTGTAAAGTGAACTAAGTGAAATAAACGCAAAGCAAAATGTCTGGACGTGGAAAAGGTGGCAAAGTGAAGGGAAAGGCAAAGTCCCGCTCAAACCGTGCCGGTCTTCAATTCCCTGTGGGCCGTATTCACCGTTTGCTCCGGAAGGGAAACTACGCAGAGCGTGTTGGTGCAGGCGCTCCAGTTTACCTAGCTGCCGTAATGGAATATCTGGCCGCTGAGGTTCTCGAGTTGGCTGGCAATGCTGCTCGTGACAACAAGAAGACTAGAAT…
comp2004487_c0_seq1	5.6e-68	699	sp|P08985|H2AV_DROME	Histone H2A.v OS=Drosophila melanogaster GN=His2Av PE=1 SV=2	5.9e-57	595	sp|Q32LA7|H2AV_BOVIN	Histone H2A.V OS=Bos taurus GN=H2AFV PE=2 SV=3	5.9e-57	595	sp|P02272|H2AV_CHICK	Histone H2A.V OS=Gallus gallus GN=H2AFV PE=1 SV=2		+	+		++	Group_Histones	ATCGTGTAATTACTTTGCTCTAAATTAAGTTTTGTTTTTGTTTCATACTCAACCTCGCCAAGGATGCGTGCGGGTAAATACGTTTTGTGTGTTTGTATTTTTTGTTTGTATGTATGTGAGTGTTGGGGAGATGCTAGAATTACATAATTATGTATTACGTTGTATATAAGAAATATATGCTGGCGCACAGAAATGATTACAACTCGTCGGTGTTTTAGCTTGTCTCTGCTGAAATCTGAATTAAACATTAGTGTTGCATGTTTCGAAGGCGTCCGATTGCCGACTGGCTTAGTAGGCCTGCGACAGAATGACGTTGCCCTTCCGCTGCGGATCCTGCACCGTTTCCTCCTTCTTGCCGATCAGCGACTTGTGTATGTGCGGAATGACACCGCCACCAGC…	>comp2004487_c0_seq1_Group_Histones ATCGTGTAATTACTTTGCTCTAAATTAAGTTTTGTTTTTGTTTCATACTCAACCTCGCCAAGGATGCGTGCGGGTAAATACGTTTTGTGTGTTTGTATTTTTTGTTTGTATGTATGTGAGTGTTGGGGAGATGCTAGAATTACATAATTATGTATTACGTTGTATATAAGAAATATATGCTGGCGCACAGAAATGATTACAACTCGTCGGTGTTTTAGCTTGTCTCTGCTGAAATCTGAATTAAACATTAGTGTTGCATGTTTCGAAGGCGTCCGATTGCCGACTGGCTTAGTAGGCCTGCGACAGAATGACGTTGCCCTTCCGCTGCGGATCCTGCACCGTTTCCTCCTTCTTGCCGATCAG…
comp2276936_c0_seq3	2.7e-45	485	sp|P19374|H2B_PLADU	Histone H2B OS=Platynereis dumerilii PE=3 SV=2	9.1e-45	480	sp|P27326|H2B_URECA	Histone H2B OS=Urechis caupo PE=3 SV=2	1.5e-44	478	sp|Q8I1N0|H2B_DROYA	Histone H2B OS=Drosophila yakuba GN=His2B PE=3 SV=3		+	+		++	Group_Histones	GGAAGAAGAAGAAGAAGAGGAGGAGGAGGGAATCCTACTCCATCTACATCTACAAAGTCTTGAAGCAAGTGCACCCCGACACTGGAATCAGCTCCAAGGCCATGTCCATCATGAACTCCTTTGTCAACGACATCTTCGAGCGCATCGCTGCTGAAGCTTCCCGTCTGGCCCACTACAACAGAAGGAGCACCATCACCTCCAGAGAGATCCAGACTGCTGTCCGTCTTCTCTTGCCCGGAGAGTTGGCCAAGCACGCCGTGTCCGAGGGAACCAAGGCTGTGACCAAGTACACCAGCTCCAAGTAAATTATTTACTTGTGAAGCCGACAAACAAACATCAACAACCGGCCATTTTAATGGCCACCAAATCCTCCAAAGAGAGCTGATCATGTACACATTA…	>comp2276936_c0_seq3_Group_Histones GGAAGAAGAAGAAGAAGAGGAGGAGGAGGGAATCCTACTCCATCTACATCTACAAAGTCTTGAAGCAAGTGCACCCCGACACTGGAATCAGCTCCAAGGCCATGTCCATCATGAACTCCTTTGTCAACGACATCTTCGAGCGCATCGCTGCTGAAGCTTCCCGTCTGGCCCACTACAACAGAAGGAGCACCATCACCTCCAGAGAGATCCAGACTGCTGTCCGTCTTCTCTTGCCCGGAGAGTTGGCCAAGCACGCCGTGTCCGAGGGAACCAAGGCTGTGACCAAGTACACCAGCTCCAAGTAAATTATTTACTTGTGAAGCCGACAAACAAACATCAACAACCGGCCATTTTAATGGCCAC…
comp2206512_c0_seq1	1.5e-65	676	sp|Q5E9F8|H33_BOVIN	Histone H3.3 OS=Bos taurus GN=H3F3A PE=1 SV=3	1.5e-65	676	sp|P84247|H33_CHICK	Histone H3.3 OS=Gallus gallus GN=H3-IX PE=1 SV=2	1.5e-65	676	sp|Q6PI20|H33_DANRE	Histone H3.3 OS=Danio rerio GN=h3f3a PE=2 SV=3			+		+	Group_Histones	TGGCATAGCTAATTCGCGCATAATGAGGCAATGACCACAGTCCTTAGCGCGACTTGAGAGGGAAAGGTTGAAAACGCCGTGAAAGAGTAAAAGATGGCCCGTACAAAGCAGACTGCCCGTAAATCTACTGGAGGAAAGGCTCCAAGGAAGCAACTTGCCACCAAGGCTGCCCGTAAGAGCGCCCCTTCAACTGGCGGAGTGAAGAAGCCCCACAGATACAGGCCTGGTACAGTCGCTCTCAGAGAAATCAGAAGGTACCAGAAATCCACTGAGTTGCTCATCAGGAAGCTCCCCTTCCAGCGTTTGGTGAGAGAAATTGCTCAGGACTTCAAGACAGATCTCCGATTCCAGTCAGCTGCCATTGGCGCTCTCCAGGAAGCCAGTGAAGCTTATTTGGTC…	>comp2206512_c0_seq1_Group_Histones TGGCATAGCTAATTCGCGCATAATGAGGCAATGACCACAGTCCTTAGCGCGACTTGAGAGGGAAAGGTTGAAAACGCCGTGAAAGAGTAAAAGATGGCCCGTACAAAGCAGACTGCCCGTAAATCTACTGGAGGAAAGGCTCCAAGGAAGCAACTTGCCACCAAGGCTGCCCGTAAGAGCGCCCCTTCAACTGGCGGAGTGAAGAAGCCCCACAGATACAGGCCTGGTACAGTCGCTCTCAGAGAAATCAGAAGGTACCAGAAATCCACTGAGTTGCTCATCAGGAAGCTCCCCTTCCAGCGTTTGGTGAGAGAAATTGCTCAGGACTTCAAGACAGATCTCCGATTCCAGTCAGCTGCCATT…
comp2273257_c0_seq9	2.5e-49	523	sp|P62803|H4_BOVIN	Histone H4 OS=Bos taurus PE=1 SV=2	2.5e-49	523	sp|P62800|H4_CAIMO	Histone H4 OS=Cairina moschata PE=3 SV=2	2.5e-49	523	sp|Q7KQD1|H4_CHAVR	Histone H4 OS=Chaetopterus variopedatus PE=3 SV=3			+		+	Group_Histones	GATTTGGTGGCCATTAAAATGGCCAGGTTTGTTTTTGGTCTTGTTTCGAAGAAGCGAAGTCAGTCAACTGCTTAACCTCCGAATCCGTAGAGGGTACGTCCTTGCCTCTTCAGGGCGTAGACGACATCCATGGCGGTGACGGTCTTCCTCTTGGCATGCTCGGTGTAGGTGACGGCATCCCTGATGACATTCTCCAAGAAAACCTTCAGCACTCCTCTGGTCTCTTCATAGATGAGTCCGGAGATACGCTTGACTCCACCTCTGCGGGCAAGACGACGGATGGCGGGCTTGGTGATACCCTGGATGTTATCACGAAGTACCTTCCTGTGGCGCTTAGCACCCCCCTTTCCGAGTCCCTTTCCTCCTTTACCACGGCCTGACATGATGCTTACAGTCTGA…	>comp2273257_c0_seq9_Group_Histones GATTTGGTGGCCATTAAAATGGCCAGGTTTGTTTTTGGTCTTGTTTCGAAGAAGCGAAGTCAGTCAACTGCTTAACCTCCGAATCCGTAGAGGGTACGTCCTTGCCTCTTCAGGGCGTAGACGACATCCATGGCGGTGACGGTCTTCCTCTTGGCATGCTCGGTGTAGGTGACGGCATCCCTGATGACATTCTCCAAGAAAACCTTCAGCACTCCTCTGGTCTCTTCATAGATGAGTCCGGAGATACGCTTGACTCCACCTCTGCGGGCAAGACGACGGATGGCGGGCTTGGTGATACCCTGGATGTTATCACGAAGTACCTTCCTGTGGCGCTTAGCACCCCCCTTTCCGAGTCCCTTTCCT…
comp2271675_c0_seq2	0.997	87	sp|Q43484|KNOX3_HORVU	Homeobox protein KNOX3 OS=Hordeum vulgare GN=KNOX3 PE=1 SV=1									+	+	+		+++	Candidate_unknown_(KNOX3)	CCTGGCTGGAGCAGACAGCATAGCCGTTTTATCGCTTCAGCACAATGATGTTGGTCTACGCTGTGGCAGTTTTGCTGCTGGCCCTTGTGACAGGCACGGAAGTCGAGGTGCCACCGACAGTGGAGGCTGAAGCAACTAAGTCTGAAGTTTGTCAACAATTTTATGTCCTGACCTCAGAATTCCTGGATGAACTGAAGAGTTCACAGCCTAAATGGTACAAGAATGCTGCTTTTCTTTCCCGCATGTTGCTCCGCGTTGACATCAGCAACCCTCTAGACTTGAAGCGATTCATCTGTCAACTCAGCGGACTGGAATCAATGAAAGACCTCCAACAAATGATGTCCCGTATCATAGGTAGACCAGCAGATTATGATAGGCTACTGAGCAGATATCAAGGCA…	>comp2271675_c0_seq2_Candidate_unknown_(KNOX3) CCTGGCTGGAGCAGACAGCATAGCCGTTTTATCGCTTCAGCACAATGATGTTGGTCTACGCTGTGGCAGTTTTGCTGCTGGCCCTTGTGACAGGCACGGAAGTCGAGGTGCCACCGACAGTGGAGGCTGAAGCAACTAAGTCTGAAGTTTGTCAACAATTTTATGTCCTGACCTCAGAATTCCTGGATGAACTGAAGAGTTCACAGCCTAAATGGTACAAGAATGCTGCTTTTCTTTCCCGCATGTTGCTCCGCGTTGACATCAGCAACCCTCTAGACTTGAAGCGATTCATCTGTCAACTCAGCGGACTGGAATCAATGAAAGACCTCCAACAAATGATGTCCCGTATCAT…
comp2278333_c0_seq10	8.1e-129	807	sp|Q61191|HCFC1_MOUSE	Host cell factor 1 OS=Mus musculus GN=Hcfc1 PE=1 SV=2	1.6e-128	803	sp|P51611|HCFC1_MESAU	Host cell factor 1 OS=Mesocricetus auratus GN=HCFC1 PE=1 SV=1	3e-128	786	sp|P51610|HCFC1_HUMAN	Host cell factor 1 OS=Homo sapiens GN=HCFC1 PE=1 SV=2			+		+		AGAGACCTTCGAACGCCAGACCAAATGAATATTGACGAAATCTTGCGGTCTACCGATTACATGGGTCACACTTTCAGCCAGAGTGAATTGGAGAACACAGCACATTCCAGTGAACGTGGTATGACTGGCTCTTTGACTCGTTCTGCATTATTCGGGGACACTAGAGACAGCGAAAGACTACAAAATGATGATTTCGGAACGTCAGGACAATTTCTAGACAGTTTAGAATCATCAATTAACACAGACCAGTTGTTACAGAGGCAGCCGCGCTCTATCAATAGCACCCAAGATGGTTTTAATCGCCTTGTAGGTGCACAGGCGACACCTAGTGGGCGGTCGCTAATGGCAACGGTCAATTTAGAGAGCACCACTTCCGTGGAGGAGGGATCTGAAGCGCAA…	>comp2278333_c0_seq10 AGAGACCTTCGAACGCCAGACCAAATGAATATTGACGAAATCTTGCGGTCTACCGATTACATGGGTCACACTTTCAGCCAGAGTGAATTGGAGAACACAGCACATTCCAGTGAACGTGGTATGACTGGCTCTTTGACTCGTTCTGCATTATTCGGGGACACTAGAGACAGCGAAAGACTACAAAATGATGATTTCGGAACGTCAGGACAATTTCTAGACAGTTTAGAATCATCAATTAACACAGACCAGTTGTTACAGAGGCAGCCGCGCTCTATCAATAGCACCCAAGATGGTTTTAATCGCCTTGTAGGTGCACAGGCGACACCTAGTGGGCGGTCGCTAATGGCAACGGTCAATTTAGAGAGCACCACTTCCGT…
comp2261479_c0_seq1	4.8e-87	879	sp|P00348|HCDH_PIG	Hydroxyacyl-coenzyme A dehydrogenase, mitochondrial OS=Sus scrofa GN=HADH PE=1 SV=2	6.1e-87	878	sp|Q9WVK7|HCDH_RAT	Hydroxyacyl-coenzyme A dehydrogenase, mitochondrial OS=Rattus norvegicus GN=Hadh PE=2 SV=1	2.1e-86	873	sp|Q61425|HCDH_MOUSE	Hydroxyacyl-coenzyme A dehydrogenase, mitochondrial OS=Mus musculus GN=Hadh PE=1 SV=2		+			+		TGTTGAGGGTCTCACACGGCTCAAACAGTTCTTTGTCAGGATACAGTTTATGCCATCCATCAACGATGAATTTGGAAGTATCTAAGCCTACATAGTCCGCCAATTCAAATGGTCCCATGGGCATTCCAGCGCCAAGTTTCATAGCCAAGTCTACATCTCTAGGGGTAGCATCACCTCTCTCAACCATTTTCATGGCCTCAAATAGGTAAGGAACAAGGAGCCTATTAACGATGAAACCAGGTGTGTCCTTAGCCTGAACAGGTGTCTTGCCCAATTTTTCACTGAAGTCGAACAAGGCAGAATTTGTGGCATCACTAGTTTCTGGAGTTCGGACAACCTCGACTAATTTCATTACAGGAACAGGGTTGAAAAAGTGCAGCCCTCCAAAACGGTCCTTTC…	>comp2261479_c0_seq1 TGTTGAGGGTCTCACACGGCTCAAACAGTTCTTTGTCAGGATACAGTTTATGCCATCCATCAACGATGAATTTGGAAGTATCTAAGCCTACATAGTCCGCCAATTCAAATGGTCCCATGGGCATTCCAGCGCCAAGTTTCATAGCCAAGTCTACATCTCTAGGGGTAGCATCACCTCTCTCAACCATTTTCATGGCCTCAAATAGGTAAGGAACAAGGAGCCTATTAACGATGAAACCAGGTGTGTCCTTAGCCTGAACAGGTGTCTTGCCCAATTTTTCACTGAAGTCGAACAAGGCAGAATTTGTGGCATCACTAGTTTCTGGAGTTCGGACAACCTCGACTAATTTCATTACAGGAACAGGGTTGAAAAAGTGCA…
comp2269698_c0_seq1	0	3249	sp|P70168|IMB1_MOUSE	Importin subunit beta-1 OS=Mus musculus GN=Kpnb1 PE=1 SV=2	0	3241	sp|Q14974|IMB1_HUMAN	Importin subunit beta-1 OS=Homo sapiens GN=KPNB1 PE=1 SV=2	0	3216	sp|P52296|IMB1_RAT	Importin subunit beta-1 OS=Rattus norvegicus GN=Kpnb1 PE=1 SV=1		+			+		GATGATTGGGCTTTACGTCCTGTATTTATGCTGATAAATGACCCGGGATGGATGATGGCTTGAGATGAGAGTTCACATTTTCACTCTGCTTTCTGGGCAAGCAATCACACACACAAGTCCACAGCAATCTCATCAACATGCAATGAATATGTGATGAATATTCATGAATATCCACGCATAAATTAGCATGAAATTAGAATGAAATTGCATTCTCTCGCACACAATAGTCCGTCCTACAGTCCGTCCGTTGTGTTTGTTGGTTGTGTTTGTTTTTTAAGTCAGTCAGTCGTCACTTGGCGCAGCACACACACTCATCATGTGACACATGCACCCTGGCGCCCTCTTGGGACACTCAACAACAACCACGACAACAAATGTCGTCACGTTGTCACGAGCAGT…	>comp2269698_c0_seq1 GATGATTGGGCTTTACGTCCTGTATTTATGCTGATAAATGACCCGGGATGGATGATGGCTTGAGATGAGAGTTCACATTTTCACTCTGCTTTCTGGGCAAGCAATCACACACACAAGTCCACAGCAATCTCATCAACATGCAATGAATATGTGATGAATATTCATGAATATCCACGCATAAATTAGCATGAAATTAGAATGAAATTGCATTCTCTCGCACACAATAGTCCGTCCTACAGTCCGTCCGTTGTGTTTGTTGGTTGTGTTTGTTTTTTAAGTCAGTCAGTCGTCACTTGGCGCAGCACACACACTCATCATGTGACACATGCACCCTGGCGCCCTCTTGGGACACTCAACAACAACCACGACAACAAATGT…
comp2267765_c0_seq1	3e-12	202	sp|Q05049|MUC1_XENLA	Integumentary mucin C.1 (Fragment) OS=Xenopus laevis PE=2 SV=1	2.1e-11	171	sp|Q863J2|TFF2_CANLF	Trefoil factor 2 OS=Canis lupus familiaris GN=TFF2 PE=2 SV=1	2.1e-10	162	sp|P01359|TFF2_PIG	Trefoil factor 2 (Fragment) OS=Sus scrofa GN=TFF2 PE=1 SV=4		+			+		GGAGTAAGTGGAAGGGTATGACTTTATTATTATTATTACAAACAGTAATTTCTGGCAACAACATTATTCAATGGACCAGGTCAGAACTTTGTAGTTGGAGTAGCATTTAGAACCCCATCCCCAGGAGACAACAGTGCAGCCAGCCGCTGGATCCAGGTAGCCTGGTGTGTCCCCAGCCCTGGTGCTGGCAGTGGCAACGTAGTACATGTGACTGGCATCATTGACGGCATGTCCCCCAACAATCGCTCCAGCAGGTATTTCTCCATCAGAAGCTGATGTCCATGACAGCTTAACATTTGAGTCAGTTTTAACCATAGCCTCAAAATTCTTGGAAGTTATTTCAAGTCCATCCAAGCCAAAGTAAGCAGCTCCCCATCTGGTGTGTATCTTGGCTGGGAA…	>comp2267765_c0_seq1 GGAGTAAGTGGAAGGGTATGACTTTATTATTATTATTACAAACAGTAATTTCTGGCAACAACATTATTCAATGGACCAGGTCAGAACTTTGTAGTTGGAGTAGCATTTAGAACCCCATCCCCAGGAGACAACAGTGCAGCCAGCCGCTGGATCCAGGTAGCCTGGTGTGTCCCCAGCCCTGGTGCTGGCAGTGGCAACGTAGTACATGTGACTGGCATCATTGACGGCATGTCCCCCAACAATCGCTCCAGCAGGTATTTCTCCATCAGAAGCTGATGTCCATGACAGCTTAACATTTGAGTCAGTTTTAACCATAGCCTCAAAATTCTTGGAAGTTATTTCAAGTCCATCCAAGCCAAAGTAAGCAGCTCCCCATCT…
gnl_Pdu_trscr_assembly_1_1213	2.7e-45	517	sp|P14708|INVO_PONPY	Involucrin OS=Pongo pygmaeus GN=IVL PE=2 SV=1	1.3e-24	337	sp|Q939N5|GSPB_STRGN	Platelet binding protein GspB OS=Streptococcus gordonii GN=gspB PE=1 SV=1	0.0019	139	sp|Q4L9P0|SRAP_STAHJ	Serine-rich adhesin for platelets OS=Staphylococcus haemolyticus (strain JCSC1435) GN=sraP PE=3 SV=1	+		+		++		GTCTGAGAAGAAAGACGAGAAGGGAGCCCCCGAGGATCAAGCAGCTGGTGCAACGAGCAATCCGCCCGCAGTGAACGGCCACGTGGAGGACGTCCAAGGTCAGACGAACGCTGAGGCAGAGGAGGTCAAGGTCGTTGTGGAACAACATTCAGAATCCAAACCGGAACCAGCTCCCAGAAAGAACAAGAAGCAGCTGAGGGACGAGTTCTTCCGAATGGACACCACACCTGTCAAGTCTGACCCATTCCCACCGTCACCTGCCAAGTTGCGGGCACAGAAGCCAATTGAAGTTGAAGGAAGCACAGAAGCCCTTGTCCCTCCACCAAGGAAGAGGAAGACTTCAAAGGAGGAGAGGGAAGCTGAGGATGCAGAGGCCATGGCTGCTGCTGCTGCGATCGA…	>gnl_Pdu_trscr_assembly_1_1213 GTCTGAGAAGAAAGACGAGAAGGGAGCCCCCGAGGATCAAGCAGCTGGTGCAACGAGCAATCCGCCCGCAGTGAACGGCCACGTGGAGGACGTCCAAGGTCAGACGAACGCTGAGGCAGAGGAGGTCAAGGTCGTTGTGGAACAACATTCAGAATCCAAACCGGAACCAGCTCCCAGAAAGAACAAGAAGCAGCTGAGGGACGAGTTCTTCCGAATGGACACCACACCTGTCAAGTCTGACCCATTCCCACCGTCACCTGCCAAGTTGCGGGCACAGAAGCCAATTGAAGTTGAAGGAAGCACAGAAGCCCTTGTCCCTCCACCAAGGAAGAGGAAGACTTCAAAGGAGGAGAGGGAAGCTGAGGATG…
comp2271909_c0_seq2	1.6e-127	1261	sp|O43837|IDH3B_HUMAN	Isocitrate dehydrogenase [NAD] subunit beta, mitochondrial OS=Homo sapiens GN=IDH3B PE=1 SV=2	1.6e-127	1261	sp|Q28479|IDH3B_MACFA	Isocitrate dehydrogenase [NAD] subunit beta, mitochondrial OS=Macaca fascicularis GN=IDH3B PE=2 SV=2	5.3e-127	1256	sp|Q68FX0|IDH3B_RAT	Isocitrate dehydrogenase [NAD] subunit beta, mitochondrial OS=Rattus norvegicus GN=Idh3B PE=2 SV=1			+		+		TAAATTATTTCTCGAAATTCATTTAAATTCATTTTTGTATTCAGGTTTGTTTAATAAAAAGTTTGGAGAAAAAAATTGGGACAAAGAAAAATAGGGTGGAAAGGTAGCTAATATTCTAAAAGAAAATGTTTAAAATATGTAACCTTTTTTTTTAATTTTCTTTTTTTTTTTTTTTACAGGTAATAACAATTTATTGACACAAGTCGTGACAAACAACAATGTTTAGTATATATTATATACACATCAACATCATGACAACATTTACAAAGTTGTATCTTTTCTTATCATCAATGTACAATTGTCTTGCCTAATTCTCAGTCGTATAGCATACATATTCACTTGCATAATTCACTCATCTGTATAGTATTATAATCTGCAAGTTCAACGAGGCAAAACATT…	>comp2271909_c0_seq2 TAAATTATTTCTCGAAATTCATTTAAATTCATTTTTGTATTCAGGTTTGTTTAATAAAAAGTTTGGAGAAAAAAATTGGGACAAAGAAAAATAGGGTGGAAAGGTAGCTAATATTCTAAAAGAAAATGTTTAAAATATGTAACCTTTTTTTTTAATTTTCTTTTTTTTTTTTTTTACAGGTAATAACAATTTATTGACACAAGTCGTGACAAACAACAATGTTTAGTATATATTATATACACATCAACATCATGACAACATTTACAAAGTTGTATCTTTTCTTATCATCAATGTACAATTGTCTTGCCTAATTCTCAGTCGTATAGCATACATATTCACTTGCATAATTCACTCATCTGTATAGTATTATAATCTGCA…
comp2274888_c0_seq2	0	3056	sp|P21613|KINH_DORPE	Kinesin heavy chain OS=Doryteuthis pealeii PE=2 SV=1	5.8e-288	2775	sp|P35978|KINH_STRPU	Kinesin heavy chain OS=Strongylocentrotus purpuratus PE=2 SV=1	1.1e-282	2725	sp|O60282|KIF5C_HUMAN	Kinesin heavy chain isoform 5C OS=Homo sapiens GN=KIF5C PE=1 SV=1		+			+		TTTTTTTTTTTTTTTTCACAGTTCAATAATTTATTGACCATTAAATACTTGAAGCGCACATGGTATAACCATAGAGAAATGGCATAATATGGTACGTAAATGATACAGTGCAGCTATGATACACAGAAACCCAACAGCTTGTGACTCAAGTCACATCATACAGAGAGCATCTTTCCTGAATTTCCTAAATGCTCACAAAATAAAGAAAACAAAAGAATCAACACAAATAAATACAATGACAATCACATAAAATGTCACAGTTATGATTGAGGAATTACCCCATAATATATATATATAAGCTTGCAAGATCACACAGCAAATGGAATTTTGCTCAACACATTTGCTTACAATCTACATGTGAAATCACTCAGGTTAAGACAGTGCTGGTCTGAACAATAA…	>comp2274888_c0_seq2 TTTTTTTTTTTTTTTTCACAGTTCAATAATTTATTGACCATTAAATACTTGAAGCGCACATGGTATAACCATAGAGAAATGGCATAATATGGTACGTAAATGATACAGTGCAGCTATGATACACAGAAACCCAACAGCTTGTGACTCAAGTCACATCATACAGAGAGCATCTTTCCTGAATTTCCTAAATGCTCACAAAATAAAGAAAACAAAAGAATCAACACAAATAAATACAATGACAATCACATAAAATGTCACAGTTATGATTGAGGAATTACCCCATAATATATATATATAAGCTTGCAAGATCACACAGCAAATGGAATTTTGCTCAACACATTTGCTTACAATCTACATGTGAAATCACTCAGGTTAAGA…
comp2275266_c0_seq21	8.1e-250	2415	sp|P46825|KLC_DORPE	Kinesin light chain OS=Doryteuthis pealeii PE=2 SV=1	2.3e-207	1977	sp|Q05090|KLC_STRPU	Kinesin light chain OS=Strongylocentrotus purpuratus PE=2 SV=1	1.1e-204	1989	sp|Q07866|KLC1_HUMAN	Kinesin light chain 1 OS=Homo sapiens GN=KLC1 PE=1 SV=2			+		+		GGCTACAATTTGAGAATTCACGCGAGAACTTGAAACGTCAGAAGCAGCCATTTTGAGGTTGAGAAGCCACAATCACATAGAATTTCGGGACATATTGCCTCTGTAAAGTGGCAAAAGAACCGATGAGGAACTGTTTTTGAAACCAGACCGTGTGTTGTATCCACGTCTGACGTTTCTGAACCCCTGTCGTGCGACAGAGCGCCAGGAACAAAGGCCGAAATTTTGACAGTTCATCCACCAAAATCTGCTTCCAGAAAACGTCAACATCCATGCGTGGATTTCACCGGTCAATTCTTTGGCTTTGACAAGACACAGAAATCTACAAATCTGCACATTCAGTGGCTTTTACTAAATGAAGTGTGTCTTGTGGAAGCATGAGCTCTGAGTTTCACAGGTGAC…	>comp2275266_c0_seq21 GGCTACAATTTGAGAATTCACGCGAGAACTTGAAACGTCAGAAGCAGCCATTTTGAGGTTGAGAAGCCACAATCACATAGAATTTCGGGACATATTGCCTCTGTAAAGTGGCAAAAGAACCGATGAGGAACTGTTTTTGAAACCAGACCGTGTGTTGTATCCACGTCTGACGTTTCTGAACCCCTGTCGTGCGACAGAGCGCCAGGAACAAAGGCCGAAATTTTGACAGTTCATCCACCAAAATCTGCTTCCAGAAAACGTCAACATCCATGCGTGGATTTCACCGGTCAATTCTTTGGCTTTGACAAGACACAGAAATCTACAAATCTGCACATTCAGTGGCTTTTACTAAATGAAGTGTGTCTTGTGGAAGCATG…
comp2278390_c0_seq1	1.3e-147	1072	sp|Q00174|LAMA_DROME	Laminin subunit alpha OS=Drosophila melanogaster GN=LanA PE=1 SV=2	2.5e-134	1386	sp|Q21313|EPI1_CAEEL	Laminin-like protein epi-1 OS=Caenorhabditis elegans GN=epi-1 PE=1 SV=1	1e-117	1211	sp|P19137|LAMA1_MOUSE	Laminin subunit alpha-1 OS=Mus musculus GN=Lama1 PE=1 SV=1	+				+		TCTGTTGGTCTTACTGCTATGCGCAGATTGGAGAAGGCTAACAAGACTGTCAATGATTACAGGCCTCTTGTTGATGCCATGCTGAGAAGCGGAGGTGACCCAGAAGAAAACAAGATCCTTGAGCCACTGCAGATGGAGCAACAGAAGTTGGATGACCTCGCACGAGATGTCACAAGAAGGTCTCAAAGAGTAGCCAGGGAAAGTAATGTGATGAGAGAAGACGCTGCTGATGCAAGGGACGACTCTGATGAACTGTCTGGAATCATCCGCGAGGGAGTTGAGAAGGCTAATGATGCTGTGCGTTTTGCTGAGGAAGTCCTGCAGGACATCACCAGCAACATCAACAACCAGAATGCCCAGTACTTGATTCAAGAAGCTGAACGCATCTTGGAAGACATT…	>comp2278390_c0_seq1 TCTGTTGGTCTTACTGCTATGCGCAGATTGGAGAAGGCTAACAAGACTGTCAATGATTACAGGCCTCTTGTTGATGCCATGCTGAGAAGCGGAGGTGACCCAGAAGAAAACAAGATCCTTGAGCCACTGCAGATGGAGCAACAGAAGTTGGATGACCTCGCACGAGATGTCACAAGAAGGTCTCAAAGAGTAGCCAGGGAAAGTAATGTGATGAGAGAAGACGCTGCTGATGCAAGGGACGACTCTGATGAACTGTCTGGAATCATCCGCGAGGGAGTTGAGAAGGCTAATGATGCTGTGCGTTTTGCTGAGGAAGTCCTGCAGGACATCACCAGCAACATCAACAACCAGAATGCCCAGTACTTGATTCAAGAAGCT…
comp2277243_c0_seq1	2.9e-90	875	sp|P15215|LAMC1_DROME	Laminin subunit gamma-1 OS=Drosophila melanogaster GN=LanB2 PE=2 SV=2	1.5e-85	831	sp|A0JP86|LAMC1_XENTR	Laminin subunit gamma-1 OS=Xenopus tropicalis GN=lamc1 PE=2 SV=1	2.2e-85	828	sp|P11047|LAMC1_HUMAN	Laminin subunit gamma-1 OS=Homo sapiens GN=LAMC1 PE=1 SV=3			+	+	++		GAGTGTGACCGGGAAGGCTCCACCGGCCAAGTGTGTGACGTCCGTACTGGTCAGTGTCCGTGCCAAACGAGCATCGAGGGAAGGAAGTGTGACCGCTGCGAGGAGAACAAGTTCAACATCACTGCCGGATGTATTGACTGTCCACCCTGTTATACACTGGTCCAGAAGAGAGTCAACATTCACCGAAGGAAGCTGGATGACCTCCGAGAAATCATCAGAAACATCGGAAGTAATCCCGGAGATATTGACGACGCTGACTTCAGAAGGAGGCTGTCCGTCGTGCAGGACAGTGTCAATGATCTCGTGGAGGATGCCAGAAAGATCGTCGGTGAAGGAGGCCCTGTAGGAGACCAGCTAGAAGCTCTGCAGGACGCCATTAAGACTCTCATGATGGAATGT…	>comp2277243_c0_seq1 GAGTGTGACCGGGAAGGCTCCACCGGCCAAGTGTGTGACGTCCGTACTGGTCAGTGTCCGTGCCAAACGAGCATCGAGGGAAGGAAGTGTGACCGCTGCGAGGAGAACAAGTTCAACATCACTGCCGGATGTATTGACTGTCCACCCTGTTATACACTGGTCCAGAAGAGAGTCAACATTCACCGAAGGAAGCTGGATGACCTCCGAGAAATCATCAGAAACATCGGAAGTAATCCCGGAGATATTGACGACGCTGACTTCAGAAGGAGGCTGTCCGTCGTGCAGGACAGTGTCAATGATCTCGTGGAGGATGCCAGAAAGATCGTCGGTGAAGGAGGCCCTGTAGGAGACCAGCTAGAAGCTCTGCAGGACGCCATT…
comp2263928_c0_seq2	5.2e-113	1124	sp|Q99538|LGMN_HUMAN	Legumain OS=Homo sapiens GN=LGMN PE=1 SV=1	8.5e-113	1122	sp|Q4R4T8|LGMN_MACFA	Legumain OS=Macaca fascicularis GN=LGMN PE=2 SV=1	9.7e-112	1112	sp|Q95M12|LGMN_BOVIN	Legumain OS=Bos taurus GN=LGMN PE=1 SV=1		+	+		++	Candidate Legumain	CTCCGTTTTTTGATTGATTTATTCAAAAAATCCATCAGTGCATATACAAGGAATGTGCGACATACTATTTTGTGTTTCTTATCAAACTTTAAATAAAAGAAAACAATGGTCAATCATCAAAAATTTATTGAATCGTATAAAATTAATTTAAAAAGTACAAATTACAAAAAATTGCATTATTTCATCACAAAAAGCTACATTTTAACAAGCAAAATTGATAATTTTCCATGGAAGTTTTAAAATACATATGAAATCATGTGAAGTACTACTGTATAATATGTATATGAACTTAGATTAGAAAAAAAGACAGTTACAATTCGAAAATGAAATCAAGAATGTACTTTTGGGGCACAACTTTTTTATACTATTTAAACTGCAATGTGAGATCTACATACTGGA…	>comp2263928_c0_seq2_Candidate Legumain CTCCGTTTTTTGATTGATTTATTCAAAAAATCCATCAGTGCATATACAAGGAATGTGCGACATACTATTTTGTGTTTCTTATCAAACTTTAAATAAAAGAAAACAATGGTCAATCATCAAAAATTTATTGAATCGTATAAAATTAATTTAAAAAGTACAAATTACAAAAAATTGCATTATTTCATCACAAAAAGCTACATTTTAACAAGCAAAATTGATAATTTTCCATGGAAGTTTTAAAATACATATGAAATCATGTGAAGTACTACTGTATAATATGTATATGAACTTAGATTAGAAAAAAAGACAGTTACAATTCGAAAATGAAATCAAGAATGTACTTTTGGGGCACAACTTTT…
comp2275701_c1_seq1	5.9e-33	375	sp|P18428|LBP_HUMAN	Lipopolysaccharide-binding protein OS=Homo sapiens GN=LBP PE=1 SV=3	2.7e-32	369	sp|Q2TBI0|LBP_BOVIN	Lipopolysaccharide-binding protein OS=Bos taurus GN=LBP PE=2 SV=1	2.7e-32	369	sp|Q61805|LBP_MOUSE	Lipopolysaccharide-binding protein OS=Mus musculus GN=Lbp PE=1 SV=2	+				+		CTCTTGGCCACTGTAGTTTCATATCCTTGTTTGCATGGGCAGTACAGCACAATTCCGCCATCATTTCCAAGGAATGTGTCTGCTACACAACAAGGACTTGGATATTTAAGGACTGAAAACAGGCACTGCAGTCAGAACACATCACATGCTGCACATTTCAACTTCCACCAAAATGAAGGCTGAAATGTTTTTGGGGTTGCTTTTCATCTGTGTTGCCCTTTGCTTCACATCAGCACAGAACCTTGGAAAAAATTATGGAATCAATTTGCGACTACACCAAAGAGGACTAGACTATGCTACACAGAAAGCTGTTGATGAGTTCTATGCAGAATTGCGGAGTCAGCCTATCCCCAATTTTTCCGGCAATAGTGGGAAAACAACCTACAGCGTCACCAATAT…	>comp2275701_c1_seq1 CTCTTGGCCACTGTAGTTTCATATCCTTGTTTGCATGGGCAGTACAGCACAATTCCGCCATCATTTCCAAGGAATGTGTCTGCTACACAACAAGGACTTGGATATTTAAGGACTGAAAACAGGCACTGCAGTCAGAACACATCACATGCTGCACATTTCAACTTCCACCAAAATGAAGGCTGAAATGTTTTTGGGGTTGCTTTTCATCTGTGTTGCCCTTTGCTTCACATCAGCACAGAACCTTGGAAAAAATTATGGAATCAATTTGCGACTACACCAAAGAGGACTAGACTATGCTACACAGAAAGCTGTTGATGAGTTCTATGCAGAATTGCGGAGTCAGCCTATCCCCAATTTTTCCGGCAATAGTGGGAAAAC…
comp2141997_c0_seq1	3.6e-05	83	sp|O12963|3NO56_BUNMU	Long neurotoxin homolog TA-bm16 OS=Bungarus multicinctus PE=3 SV=1	7.4e-05	81	sp|Q8AY50|3NO22_BUNCA	Weak toxin 2 OS=Bungarus candidus PE=3 SV=1	0.00012	81	sp|A2CKF6|3NO28_BUNFA	Neurotoxin 3FTx-8a OS=Bungarus fasciatus PE=1 SV=1		+			+		GTTATTTTGCCAATTAAGGGATTTTGTTGGATCTTAGTCACTAGTGGGCTCTTTTGAAAGGGGTTTTTGAAGTGTCAGTACAATCGATAATTCCAAAACAAGCAGAAGCAGCGAACTTGAAAGGAAAAGGTGGGTGCACAAGGGTTGACTCAGTAGATTGAGCATGAAGACGCCCAATACTCGATCCTGATTGGCCAGCACTCTATTCATATGCAAATGAGCGCCCAGTTGCCGCAGACCCAGGGAACTTGAGTCCAGGCGAAATTGAGCGCAGAGGCAGCTACCTGTAATCACACATCAAAGAAAATGAACAAATTGGCAGTTTTGGCGGTTCTTGCTGCATGCATTGCAGTATCCCATGGTTTGAGATGCTACGTCTGCAATGAGACGTCCCTTGCC…	>comp2141997_c0_seq1 GTTATTTTGCCAATTAAGGGATTTTGTTGGATCTTAGTCACTAGTGGGCTCTTTTGAAAGGGGTTTTTGAAGTGTCAGTACAATCGATAATTCCAAAACAAGCAGAAGCAGCGAACTTGAAAGGAAAAGGTGGGTGCACAAGGGTTGACTCAGTAGATTGAGCATGAAGACGCCCAATACTCGATCCTGATTGGCCAGCACTCTATTCATATGCAAATGAGCGCCCAGTTGCCGCAGACCCAGGGAACTTGAGTCCAGGCGAAATTGAGCGCAGAGGCAGCTACCTGTAATCACACATCAAAGAAAATGAACAAATTGGCAGTTTTGGCGGTTCTTGCTGCATGCATTGCAGTATCCCATGGTTTGAGATGCTACGTC…
comp2272433_c0_seq1	8.7e-198	1924	sp|Q7ZYC4|ACBG2_XENLA	Long-chain-fatty-acid--CoA ligase ACSBG2 OS=Xenopus laevis GN=acsbg2 PE=2 SV=1	1.6e-191	1865	sp|Q5ZKR7|ACBG2_CHICK	Long-chain-fatty-acid--CoA ligase ACSBG2 OS=Gallus gallus GN=ACSBG2 PE=2 SV=2	1.5e-163	1601	sp|Q96GR2|ACBG1_HUMAN	Long-chain-fatty-acid--CoA ligase ACSBG1 OS=Homo sapiens GN=ACSBG1 PE=2 SV=2	+				+		TTTTTTTTTTTTTTTTTTTTTTAGCATAAAATCTATTTTTTATTACATTTTAGCCATTTCACTAAAAAAGGCGTATTGCACATACAAGTTGTAAAACATTAGAAAACATAAAACAAAATATTAACAATTTATTAAACATTCAATGATTCGTAACATCTGACGTAAGTTTGCAAATATAAAACTTTGAAAAAACTGTCATTGTTGAAAAAAAAGCAATTCAAGTAATCAAAGTAAAATAACAATCAAGGACATGCATTGACCATATATATTATATAAACAAGGAGTAAATATTTAATTATGTAAAACAATTAATAAAAACTAATTTTAATTGGTTGACATAAATTCAATTATTGTAGGAATATGTAGTAGACACTTAAGTGTATATAATCCAGGGTTCCA…	>comp2272433_c0_seq1 TTTTTTTTTTTTTTTTTTTTTTAGCATAAAATCTATTTTTTATTACATTTTAGCCATTTCACTAAAAAAGGCGTATTGCACATACAAGTTGTAAAACATTAGAAAACATAAAACAAAATATTAACAATTTATTAAACATTCAATGATTCGTAACATCTGACGTAAGTTTGCAAATATAAAACTTTGAAAAAACTGTCATTGTTGAAAAAAAAGCAATTCAAGTAATCAAAGTAAAATAACAATCAAGGACATGCATTGACCATATATATTATATAAACAAGGAGTAAATATTTAATTATGTAAAACAATTAATAAAAACTAATTTTAATTGGTTGACATAAATTCAATTATTGTAGGAATATGTAGTAGACACTTAAG…
comp2257781_c0_seq1	0	2982	sp|P98164|LRP2_HUMAN	Low-density lipoprotein receptor-related protein 2 OS=Homo sapiens GN=LRP2 PE=1 SV=3	0	2921	sp|P98158|LRP2_RAT	Low-density lipoprotein receptor-related protein 2 OS=Rattus norvegicus GN=Lrp2 PE=1 SV=1	0	2908	sp|A2ARV4|LRP2_MOUSE	Low-density lipoprotein receptor-related protein 2 OS=Mus musculus GN=Lrp2 PE=1 SV=1	+				+		CGGGCTTTTTTTTTTTACTTCTTATATTCGTCTTTATTCTTCAATATATTGTTATTCAATTCACATATATTCATTTTGTTAGTTGTGCTCAAGCAGTGTTTAATAATCATTTTTTGACATTACCAATTCATGATATGGTATATATATATTTCATCTAATTTTTGCAAGAAAGTGCCATCATAGGTGCCATCATTTCCAGAATATATATCTGTGTAATAATTGACATATATATCAAAATGTACTTTGATTGTTTCACAAGCCAGAGCCTGATAGTCTTGTCTTACTTGTTACTAATGTATATTCAAAGGTTCCTTGCTCTGACTGTGCCTGCTGAACTTCCTCTGGACAGAAAATAGGTCACTTTCAAACTTGTAAGATCTTCTCTGATTGGCTGATTCA…	>comp2257781_c0_seq1 CGGGCTTTTTTTTTTTACTTCTTATATTCGTCTTTATTCTTCAATATATTGTTATTCAATTCACATATATTCATTTTGTTAGTTGTGCTCAAGCAGTGTTTAATAATCATTTTTTGACATTACCAATTCATGATATGGTATATATATATTTCATCTAATTTTTGCAAGAAAGTGCCATCATAGGTGCCATCATTTCCAGAATATATATCTGTGTAATAATTGACATATATATCAAAATGTACTTTGATTGTTTCACAAGCCAGAGCCTGATAGTCTTGTCTTACTTGTTACTAATGTATATTCAAAGGTTCCTTGCTCTGACTGTGCCTGCTGAACTTCCTCTGGACAGAAAATAGGTCACTTTCAAACTTGTAAGAT…
comp2270876_c0_seq2	4.3e-70	719	sp|P05455|LA_HUMAN	Lupus La protein OS=Homo sapiens GN=SSB PE=1 SV=2	4.3e-69	683	sp|P32067|LA_MOUSE	Lupus La protein homolog OS=Mus musculus GN=Ssb PE=1 SV=1	8e-69	707	sp|P10881|LA_BOVIN	Lupus La protein homolog OS=Bos taurus GN=SSB PE=2 SV=2			+	+	++		TTTTTTTTTTTTTTTTTTTTAGAATTTGACAGTTTTATTATTACAATGAGATAAATCTTGTGAAATATATAAGATAAATGAATCCAGTATGCTCAATAAAATGCATTGATAAGCTAGCTCACAACTATTATGACTGGCTATTAGGAAAATTCAATTTCGAAAATAAAATATCAGTGTATTTACAAAATATAGTGTGCGAATTTCAGTAAAGACTATGTAGCACATAAGATATACTTGTTTCTCCTCGAATTTTCAGACTTTTTTCACCTTAAAATATAACACATAATCATAAATCTATGATGTTACTAAGTACAAAATGTCTGTATTTTATTGGATTTAGTTATTTTATAGGTAACACCTGACATGCATGATTCTACTTCAGGACAAAAACAAAACGAC…	>comp2270876_c0_seq2 TTTTTTTTTTTTTTTTTTTTAGAATTTGACAGTTTTATTATTACAATGAGATAAATCTTGTGAAATATATAAGATAAATGAATCCAGTATGCTCAATAAAATGCATTGATAAGCTAGCTCACAACTATTATGACTGGCTATTAGGAAAATTCAATTTCGAAAATAAAATATCAGTGTATTTACAAAATATAGTGTGCGAATTTCAGTAAAGACTATGTAGCACATAAGATATACTTGTTTCTCCTCGAATTTTCAGACTTTTTTCACCTTAAAATATAACACATAATCATAAATCTATGATGTTACTAAGTACAAAATGTCTGTATTTTATTGGATTTAGTTATTTTATAGGTAACACCTGACATGCATGATTCTACT…
comp2278194_c0_seq1	0	3280	sp|Q5EAJ7|MVP_STRPU	Major vault protein OS=Strongylocentrotus purpuratus GN=MVP PE=1 SV=1	0	3021	sp|Q6P3L0|MVP_DANRE	Major vault protein OS=Danio rerio GN=mvp PE=2 SV=1	0	3015	sp|Q6PF69|MVP_XENLA	Major vault protein OS=Xenopus laevis GN=mvp PE=2 SV=1		+			+		CTTTTTTCGTTGACATCTTTTATTGCTATGCACATATGTCAGTTGGTGACTGATGAATCAATATTACCCGTTGACTACAATTGTTTAAGAAAAACATTCTCGTCCTTGGTATAATTCTGTAATATAGACATACTTGGGTTAAGTCCTAAATAAATGCAATGTATTCATTTTAAAAAATGTTATGCCACTATCAAAGCTATCTAGAGCTCTTCAGGTCCAACTACACAATGCAATCACACATCATATGCAGCTTGGTGTAATTAGCCATGCAACGTGGTTCCGAAATGCCAGTGACACATTGGATCCAGCCAGGTTAGCCCGCTCAACAAGCCACGGAATGCTACATAGCCCTAATACAGAATCATTTCACAAATGTGATCACACATAATTATCACAGCA…	>comp2278194_c0_seq1 CTTTTTTCGTTGACATCTTTTATTGCTATGCACATATGTCAGTTGGTGACTGATGAATCAATATTACCCGTTGACTACAATTGTTTAAGAAAAACATTCTCGTCCTTGGTATAATTCTGTAATATAGACATACTTGGGTTAAGTCCTAAATAAATGCAATGTATTCATTTTAAAAAATGTTATGCCACTATCAAAGCTATCTAGAGCTCTTCAGGTCCAACTACACAATGCAATCACACATCATATGCAGCTTGGTGTAATTAGCCATGCAACGTGGTTCCGAAATGCCAGTGACACATTGGATCCAGCCAGGTTAGCCCGCTCAACAAGCCACGGAATGCTACATAGCCCTAATACAGAATCATTTCACAAATGTGA…
comp2277374_c0_seq2	3.1e-115	1145	sp|Q5ZME2|MDHC_CHICK	Malate dehydrogenase, cytoplasmic OS=Gallus gallus GN=MDH1 PE=2 SV=1	1.4e-112	1120	sp|Q6DIY9|MDHC_XENTR	Malate dehydrogenase, cytoplasmic OS=Xenopus tropicalis GN=mdh1 PE=2 SV=1	3.7e-112	1116	sp|P40925|MDHC_HUMAN	Malate dehydrogenase, cytoplasmic OS=Homo sapiens GN=MDH1 PE=1 SV=4		+			+		CTTTGGTCGTCGCGACATTAGATATAATAGGATGAATGGTATGTCGTTGATATTGTACAAAGACTATGTCCTGCACTTTAACAATACTTCAATAGTTTTGTACTAAAATAGACTCATACAGAAATAGTTTAACGCACCTTTAAGTTATCGATGCTATATGTTCATAGGCCAAGAATGCAACATAATAAATGCATTGAAAAGATACCCATATAATAGAAACTAGAAACTTGTTCCGTTCACAAGCTATTAACCCTGTATTGTACACCAAACCCATTAACAATATCTAAATTCAAATAATGTCAGAGGCAGTAAATTAAAATTTTAAAATCAAAACATCGAGAAATAAAAGACTCAAGTCTCAAGAAATTAAGAAGAAACAAACGCTGCGAGAAGCATGTT…	>comp2277374_c0_seq2 CTTTGGTCGTCGCGACATTAGATATAATAGGATGAATGGTATGTCGTTGATATTGTACAAAGACTATGTCCTGCACTTTAACAATACTTCAATAGTTTTGTACTAAAATAGACTCATACAGAAATAGTTTAACGCACCTTTAAGTTATCGATGCTATATGTTCATAGGCCAAGAATGCAACATAATAAATGCATTGAAAAGATACCCATATAATAGAAACTAGAAACTTGTTCCGTTCACAAGCTATTAACCCTGTATTGTACACCAAACCCATTAACAATATCTAAATTCAAATAATGTCAGAGGCAGTAAATTAAAATTTTAAAATCAAAACATCGAGAAATAAAAGACTCAAGTCTCAAGAAATTAAGAAGAAAC…
comp2245960_c0_seq1	0.5	52	sp|Q01643|MS84B_DROME	Male-specific sperm protein Mst84Db OS=Drosophila melanogaster GN=Mst84Db PE=2 SV=2										+			+		AGCTTGAGCTGCTTGTGGTGCCTGAGCTGCTTGTGGTGCCTGTCCTGCCTGTCCAGGTGTTGCTTCTTGGCATTCCATAACAAACAAGTCACGGATTGTGATGTCTCTGTCAGGTCCGGCTGCTACTCTAATCCTGATGGTTCTCACAAGGAAGCCGCTGCTGTATCCACTGACGGAATATGAAAATTGTTCCAGTTTGTCCGTATTTGGGTTTGTTGGAGTGCTGCTTGTTGGTGATCCATCGGGTGTGTATCTGAAGACAACTGTTCTTGCTCCGGAAATTTGGAGACTGACAAACAGATCAGCTCTACGAGCCCTTGGCAACAATTTGATAATGATGGTTGTTGCTCCTTTAGTCACCAGTCCAGTAGTAGATGAAGAACGAAGGACGAGTCCTGA…	>comp2245960_c0_seq1 AGCTTGAGCTGCTTGTGGTGCCTGAGCTGCTTGTGGTGCCTGTCCTGCCTGTCCAGGTGTTGCTTCTTGGCATTCCATAACAAACAAGTCACGGATTGTGATGTCTCTGTCAGGTCCGGCTGCTACTCTAATCCTGATGGTTCTCACAAGGAAGCCGCTGCTGTATCCACTGACGGAATATGAAAATTGTTCCAGTTTGTCCGTATTTGGGTTTGTTGGAGTGCTGCTTGTTGGTGATCCATCGGGTGTGTATCTGAAGACAACTGTTCTTGCTCCGGAAATTTGGAGACTGACAAACAGATCAGCTCTACGAGCCCTTGGCAACAATTTGATAATGATGGTTGTTGCTCCTTTAGTCACCAGTCCAGTAGTAGATGA…
comp2262137_c0_seq4	0.0053	111	sp|Q99M71|EPDR1_MOUSE	ependymin-related protein 1 (mammalian) OS=Mus musculus GN=Epdr1 PE=1 SV=1	0.0053	111	sp|Q5XII0|EPDR1_RAT	Mammalian ependymin-related protein 1 OS=Rattus norvegicus GN=Epdr1 PE=2 SV=1	0.02	106	sp|Q9N0C7|EPDR1_MACFA	Mammalian ependymin-related protein 1 OS=Macaca fascicularis GN=EPDR1 PE=2 SV=3	+		+	+	+++	Group_ependymins	TCTTTTTTTTTTTTTTGAAGTCATGAATGATTTTATTCAACCAACTTTTTGTCAAGATTACATTGCACTATATTGCAGAATAATATACATGATTCAATGTTGTTGACATATTGTCCATACCATTACATGTAAAAAGAGTTGTTGGGAAAAATTTCTTCACTGTAAAAATATACAAAAATGTAGATATTATATCTCTATGAAATTCAATTCTGCCGTTAGTTTCTTTACTCGACGGGCATGAGCATGAAGAACGGAACAGGCAATCCCTGGGGAATGAGCATCTTCTCCTCATTGCTGGCCTTGCAAGTGTCAGGAATGGTGAATAAGTCCTTGTCGATTATTTCCATTTCTGCGTGCACATAGGACACTCCTTTGTGGGTCTTTCCACCATCGATGTTG…	>comp2262137_c0_seq4_Group_ependymins TCTTTTTTTTTTTTTTGAAGTCATGAATGATTTTATTCAACCAACTTTTTGTCAAGATTACATTGCACTATATTGCAGAATAATATACATGATTCAATGTTGTTGACATATTGTCCATACCATTACATGTAAAAAGAGTTGTTGGGAAAAATTTCTTCACTGTAAAAATATACAAAAATGTAGATATTATATCTCTATGAAATTCAATTCTGCCGTTAGTTTCTTTACTCGACGGGCATGAGCATGAAGAACGGAACAGGCAATCCCTGGGGAATGAGCATCTTCTCCTCATTGCTGGCCTTGCAAGTGTCAGGAATGGTGAATAAGTCCTTGTCGATTATTTCCATTTCTGCGTGCACAT…
comp2276747_c1_seq2	1.8e-14	229	sp|Q6PF21|SYMC_XENLA	Methionine--tRNA ligase, cytoplasmic OS=Xenopus laevis GN=mars PE=2 SV=1	5.9e-13	215	sp|Q68FL6|SYMC_MOUSE	Methionine--tRNA ligase, cytoplasmic OS=Mus musculus GN=Mars PE=1 SV=1	4.2e-11	198	sp|Q2T9L8|SYMC_BOVIN	Methionine--tRNA ligase, cytoplasmic OS=Bos taurus GN=MARS PE=2 SV=1			+	+	++		TTTTTTTTTTTTTTTTTTTAGTGCCAAAAAAGCTTTAATATGAGAAAATATCATTACAAATATATCATATATAATGTACTACGACAAAGGGTTGCCATTCGTAAATAAAATAAGCTAAAACAAAAAGAAAAGTTCAAAAATAAGCAAAGGCAAAATTTTTAATAATAATTCATAGAATTATTCAAGTTAATCAATTACAACCGCAAATGCCCTGGATATCAAAAAGAACATTTAAAAGATTCAATAGTTTTAGATAAACGCCGATTTAAAAAAATTCACAGTAATGCTCGAAATTGAGTGTGAATCCGATTACCGGATTACACAATTAAGTCAAATTTATGAAAATTATTTTTCCGTTTACGGTAAAAATACTCCCTTTTATCCATAATCATCCTCGCT…	>comp2276747_c1_seq2 TTTTTTTTTTTTTTTTTTTAGTGCCAAAAAAGCTTTAATATGAGAAAATATCATTACAAATATATCATATATAATGTACTACGACAAAGGGTTGCCATTCGTAAATAAAATAAGCTAAAACAAAAAGAAAAGTTCAAAAATAAGCAAAGGCAAAATTTTTAATAATAATTCATAGAATTATTCAAGTTAATCAATTACAACCGCAAATGCCCTGGATATCAAAAAGAACATTTAAAAGATTCAATAGTTTTAGATAAACGCCGATTTAAAAAAATTCACAGTAATGCTCGAAATTGAGTGTGAATCCGATTACCGGATTACACAATTAAGTCAAATTTATGAAAATTATTTTTCCGTTTACGGTAAAAATACTCCCTT…
comp2263073_c0_seq1	5.9e-13	176	sp|Q6AX41|MC25A_XENLA	MICOS complex subunit mic25-a OS=Xenopus laevis GN=chchd6-a PE=2 SV=2	6.8e-12	164	sp|Q5U509|MC25B_XENLA	MICOS complex subunit mic25-b OS=Xenopus laevis GN=chchd6-b PE=2 SV=2	6.1e-11	159	sp|Q5FVV3|MIC25_XENTR	MICOS complex subunit mic25 OS=Xenopus tropicalis GN=chchd6 PE=2 SV=2	+				+	Group_MICOS complex	ACATATTACCCAGGCGTTTTAATATAACAACAAAAGACAAGAATGAACAGTTTCATTCATTTTTATAGCATATGAAATAACGACTTTGTTATCTTCAATTTCTATGAAGCAAATTGCAATACTCAATACTGGCATCGCCACTATGTGATCTTAACATTTAAGAAACAATATGGCCAGCATCATTCTTCAGTTTATCTGGGATACGTTAAGCATACATCATTCATAAAATTTCAATTACAAAGCACTCTTGATCTGTATCAATTAGTCATCTTATTCAAAATAAATAAAAGCTTTTGCTCATTAATACTCCTATATATTCGCCTTTCATGTCATAAATTAGTTTATTTATTCCCTCAAGGAAAAGCAATAAAATCAAGCACATTATACAAAATCCTAAAT…	>comp2263073_c0_seq1_Group_MICOS complex ACATATTACCCAGGCGTTTTAATATAACAACAAAAGACAAGAATGAACAGTTTCATTCATTTTTATAGCATATGAAATAACGACTTTGTTATCTTCAATTTCTATGAAGCAAATTGCAATACTCAATACTGGCATCGCCACTATGTGATCTTAACATTTAAGAAACAATATGGCCAGCATCATTCTTCAGTTTATCTGGGATACGTTAAGCATACATCATTCATAAAATTTCAATTACAAAGCACTCTTGATCTGTATCAATTAGTCATCTTATTCAAAATAAATAAAAGCTTTTGCTCATTAATACTCCTATATATTCGCCTTTCATGTCATAAATTAGTTTATTTATTCCCTCAAG…
comp2235576_c0_seq2	7.2e-13	179	sp|Q21154|MOMA1_CAEEL	MICOS complex subunit MIC27 OS=Caenorhabditis elegans GN=moma-1 PE=2 SV=1	2.1e-10	142	sp|Q6UXV4|MIC27_HUMAN	MICOS complex subunit MIC27 OS=Homo sapiens GN=APOOL PE=1 SV=1	3.8e-09	133	sp|Q3SZ27|MIC27_BOVIN	MICOS complex subunit MIC27 OS=Bos taurus GN=APOL PE=2 SV=1		+			+	Group_MICOS complex	ATCGTTTTTTGGTTACATCAATCTCCTATTTCATTATGCGCAGCATCTTCTTGTCAGTAAACATGATAAGTTTAACATTAAATACATAAAATTTAACAATTTAAGATTCTCTGGTGGTGTACATATCCTTGTCCTCTGCCTTTGATTGTCCAAAATCCATCTTTGACGCGTCTACTTGTTTTGTTTCGCTGGGGGCTGCTGCTAACTTGTCCTTACTGTCAGCTGGAGAGGAGTCGGCAGCTTTAGGTGGAGGAGCAGGAGCAGCAACACCAGGGACTTCACCAAAATTCTGGTGATAAACTTCTCTGGCCTGGTCTTTAACAGCCGACCATCCTCTGCGTGAAATGTCGACCGCTTGGTTCGGGTAGCAGATGGAGGCTGCCGTTAACATTCCAGCAC…	>comp2235576_c0_seq2_Group_MICOS complex ATCGTTTTTTGGTTACATCAATCTCCTATTTCATTATGCGCAGCATCTTCTTGTCAGTAAACATGATAAGTTTAACATTAAATACATAAAATTTAACAATTTAAGATTCTCTGGTGGTGTACATATCCTTGTCCTCTGCCTTTGATTGTCCAAAATCCATCTTTGACGCGTCTACTTGTTTTGTTTCGCTGGGGGCTGCTGCTAACTTGTCCTTACTGTCAGCTGGAGAGGAGTCGGCAGCTTTAGGTGGAGGAGCAGGAGCAGCAACACCAGGGACTTCACCAAAATTCTGGTGATAAACTTCTCTGGCCTGGTCTTTAACAGCCGACCATCCTCTGCGTGAAATGTCGACCGCTTG…
comp2269421_c0_seq7	2.8e-73	749	sp|Q61166|MARE1_MOUSE	Microtubule-associated protein RP/EB family member 1 OS=Mus musculus GN=Mapre1 PE=1 SV=3	4.6e-73	747	sp|Q66HR2|MARE1_RAT	Microtubule-associated protein RP/EB family member 1 OS=Rattus norvegicus GN=Mapre1 PE=1 SV=3	1.2e-72	743	sp|Q9UPY8|MARE3_HUMAN	Microtubule-associated protein RP/EB family member 3 OS=Homo sapiens GN=MAPRE3 PE=1 SV=1			+		+		TTTTTTTTTTTTTTTTTTAAATGACAAAAGTTTATTTGTATCAGTTGTTTTAATTAGTACATTATACTTTTTTGGAGACCTAAATTATACACAATTTGCAAGCATAAAACGGACTTGAATCCTTAACAAGACCATACTGTAGGCCTAATATATTTCTGAGACAAACGGTTTATGATGTATTGTGCGAGAAATGGAAACGTGAGGACACCTAATCTCACCTGATACAAAAATTCACTCTTTCGTTATTGAGCTTTAAATTGTTCACACAGATAGTCAATTCGCAGAGGAAGAACCAGCTGTGCAGAAGAAATGCCATGCAACGAGTGCTAAAAAATCGACTGCAGTATTGCTAGTTATAAATTCTATTCACAATTACTAAAATAATGAACTGTCTGATAA…	>comp2269421_c0_seq7 TTTTTTTTTTTTTTTTTTAAATGACAAAAGTTTATTTGTATCAGTTGTTTTAATTAGTACATTATACTTTTTTGGAGACCTAAATTATACACAATTTGCAAGCATAAAACGGACTTGAATCCTTAACAAGACCATACTGTAGGCCTAATATATTTCTGAGACAAACGGTTTATGATGTATTGTGCGAGAAATGGAAACGTGAGGACACCTAATCTCACCTGATACAAAAATTCACTCTTTCGTTATTGAGCTTTAAATTGTTCACACAGATAGTCAATTCGCAGAGGAAGAACCAGCTGTGCAGAAGAAATGCCATGCAACGAGTGCTAAAAAATCGACTGCAGTATTGCTAGTTATAAATTCTATTCACAATTACTA…
comp2265350_c0_seq1	2.6e-182	1778	sp|Q3SZ71|MPPB_BOVIN	Mitochondrial-processing peptidase subunit beta OS=Bos taurus GN=PMPCB PE=2 SV=1	3.8e-181	1767	sp|O75439|MPPB_HUMAN	Mitochondrial-processing peptidase subunit beta OS=Homo sapiens GN=PMPCB PE=1 SV=2	1.3e-180	1762	sp|Q5REK3|MPPB_PONAB	Mitochondrial-processing peptidase subunit beta OS=Pongo abelii GN=PMPCB PE=2 SV=1		+			+		TTTTTTTTTTTTTTTTTTTGGTATTTACAAGTTTATTTCCTTCTTTAAAATTTGACACAATTATCTGGTGTCCTCTTCAACAGTTTCGCAGTCATCTCTCCCATGCATTGAATGATAAATTAATGTTTTTTGTACAAAATGATAATCAGTTATGTTGGTGTTTAGAAACGCAGCCAGTACATAGCCCCTCTAATTCTGTTGTAATCGGGAAGTCCTTCAACTGGGCCAACTCCAGCAACAGCCGGGCATTTGTCGTAGATGTATTTCATGCACGTATCTCTCACCATTTGAGCATCAACAGCATCAATCCTAGCATCGAGTTCAGAGAGGGGGACACGGCGACCGTAGCAAAGCAACTGACGACCAATATCCTCGCAAATTGGGGTAGATCCGTCCAAC…	>comp2265350_c0_seq1 TTTTTTTTTTTTTTTTTTTGGTATTTACAAGTTTATTTCCTTCTTTAAAATTTGACACAATTATCTGGTGTCCTCTTCAACAGTTTCGCAGTCATCTCTCCCATGCATTGAATGATAAATTAATGTTTTTTGTACAAAATGATAATCAGTTATGTTGGTGTTTAGAAACGCAGCCAGTACATAGCCCCTCTAATTCTGTTGTAATCGGGAAGTCCTTCAACTGGGCCAACTCCAGCAACAGCCGGGCATTTGTCGTAGATGTATTTCATGCACGTATCTCTCACCATTTGAGCATCAACAGCATCAATCCTAGCATCGAGTTCAGAGAGGGGGACACGGCGACCGTAGCAAAGCAACTGACGACCAATATCCTCGCAA…
comp2257395_c0_seq4	0.06	114	sp|E2RYF6|MUC22_HUMAN	Mucin-22 OS=Homo sapiens GN=MUC22 PE=1 SV=2	0.78	89	sp|Q4WNE1|CFMC_ASPFU	GPI anchored CFEM domain protein C OS=Neosartorya fumigata (strain ATCC MYA-4609 / Af293 / CBS 101355 / FGSC A1100) GN=cfmC PE=3 SV=1	0.83	97	sp|Q8TFG4|YL54_SCHPO	Uncharacterized protein PB18E9.04c OS=Schizosaccharomyces pombe (strain 972 / ATCC 24843) GN=SPAPB18E9.04c PE=3 SV=1	+				+		ATTTTTTAGCTTTTTCAGATTTTTTATTTAAAACAGCAAACTTGGGTTGAGAAAAAAATAATGGTACGGTATACCTACTTTATTTTACAAAAAATGAAAAAAATAATCAAGTATCACAGCAGAGCATACCAAGCTTCCAACATTCACTCTGAGGTATAGTAAAATTAATTAGCAAGTATAAATTTTCTAAAATTAGAAAAAAAAAATTAAATTACAAAAAATATCTTTATTGTTATAATACAATCAGGAACCTTTCACAATGCACACTTTCCTCCTCAACTTATATTCTGCTTTTATGGCAAGTAGATTAGAAAATCCATTTTGATTTTTGTCGTAACAAATAACAACTATAATAAAATTAAGCCAAGAAATAAAAGTATCTACATCGAACTAATTTTC…	>comp2257395_c0_seq4 ATTTTTTAGCTTTTTCAGATTTTTTATTTAAAACAGCAAACTTGGGTTGAGAAAAAAATAATGGTACGGTATACCTACTTTATTTTACAAAAAATGAAAAAAATAATCAAGTATCACAGCAGAGCATACCAAGCTTCCAACATTCACTCTGAGGTATAGTAAAATTAATTAGCAAGTATAAATTTTCTAAAATTAGAAAAAAAAAATTAAATTACAAAAAATATCTTTATTGTTATAATACAATCAGGAACCTTTCACAATGCACACTTTCCTCCTCAACTTATATTCTGCTTTTATGGCAAGTAGATTAGAAAATCCATTTTGATTTTTGTCGTAACAAATAACAACTATAATAAAATTAAGCCAAGAAATAAAAGT…
comp2271168_c0_seq1	0.8	95	sp|Q8BH27|MEGF9_MOUSE	Multiple epidermal growth factor-like domains protein 9 OS=Mus musculus GN=Megf9 PE=2 SV=1	0.95	68	sp|Q993T3|NSP6_ROTRH	Non-structural protein 6 OS=Rotavirus A (strain RVA/Monkey/United States/RRV/1980/G3P5B[3]) PE=3 SV=1	0.998	65	sp|P80297|MT1X_HUMAN	Metallothionein-1X OS=Homo sapiens GN=MT1X PE=1 SV=1		+			+		GTGTCGCTTGCCATTCTGTATGATCACATTTCGCTGACTGTTCAAAAATTTGAGCGATTTCATTTCGTTGTAGTAGCATATTTCATTGCATGCTTTTGTTAAATCTTTCTCTTCCAAATCAGAACAGGCATCTTGGCAAGTTCCTGTCTCACATCTATCTTTGAGGTTAATGTAGATCCTTGCCCAATGGTCTCCGTCCTCTGATTCGATGCACTCTTGGTCTGAGCTGACAACCTCCCATCTGTCTGTTCGATAATATATTCTTTGGTTTGGTGAACCATAACTCCATACATAACGTTGGAAGTCAAGCTGCCGAAGAAGTGTTTTCAATGGTGTTTCCTCGTCATTTGGGCAATTGCCATTTTGATCGGTCAGTACAAATAGTAGAGATATGGGAGC…	>comp2271168_c0_seq1 GTGTCGCTTGCCATTCTGTATGATCACATTTCGCTGACTGTTCAAAAATTTGAGCGATTTCATTTCGTTGTAGTAGCATATTTCATTGCATGCTTTTGTTAAATCTTTCTCTTCCAAATCAGAACAGGCATCTTGGCAAGTTCCTGTCTCACATCTATCTTTGAGGTTAATGTAGATCCTTGCCCAATGGTCTCCGTCCTCTGATTCGATGCACTCTTGGTCTGAGCTGACAACCTCCCATCTGTCTGTTCGATAATATATTCTTTGGTTTGGTGAACCATAACTCCATACATAACGTTGGAAGTCAAGCTGCCGAAGAAGTGTTTTCAATGGTGTTTCCTCGTCATTTGGGCAATTGCCATTTTGATCGGTCAGTAC…
comp2278100_c0_seq14	3e-76	573	sp|Q9P2K5|MYEF2_HUMAN	Myelin expression factor 2 OS=Homo sapiens GN=MYEF2 PE=1 SV=3	7.3e-73	560	sp|Q8C854|MYEF2_MOUSE	Myelin expression factor 2 OS=Mus musculus GN=Myef2 PE=1 SV=1	2.1e-52	419	sp|P52272|HNRPM_HUMAN	Heterogeneous nuclear ribonucleoprotein M OS=Homo sapiens GN=HNRNPM PE=1 SV=3			+		+		AACTATGCACCACACCGATCAAAATGGCGGACGTGAAAGCAGAGCACGACGATGGCAACGAAAATGGTTACTCTGGTGAATCTGGGGGCCGATCAAATAACCAATCTGACAACGAAAGAAACAGATCACGCTCACCCGTGAGAAGATCGAGATCTCGTTCGCCAAGAGACAAGAGAGGTGACCGCAGAGACCGAGACAGAGATAGGGACAGACACAGGGGACCCGTCACCACCACAAGAATCTACGTTTCCAACATTCCATATGAAACCAGATGGCAAGACCTCAAAGATCTCTTCAAGAAGGAAGTTGGGGACGTTGAATTTGTTGAACTGTACGACACACCGGACGGCAAACCATGTGGAGCAGGTGTTATTGAATTCAAAGACAAGGCAGCAGCAG…	>comp2278100_c0_seq14 AACTATGCACCACACCGATCAAAATGGCGGACGTGAAAGCAGAGCACGACGATGGCAACGAAAATGGTTACTCTGGTGAATCTGGGGGCCGATCAAATAACCAATCTGACAACGAAAGAAACAGATCACGCTCACCCGTGAGAAGATCGAGATCTCGTTCGCCAAGAGACAAGAGAGGTGACCGCAGAGACCGAGACAGAGATAGGGACAGACACAGGGGACCCGTCACCACCACAAGAATCTACGTTTCCAACATTCCATATGAAACCAGATGGCAAGACCTCAAAGATCTCTTCAAGAAGGAAGTTGGGGACGTTGAATTTGTTGAACTGTACGACACACCGGACGGCAAACCATGTGGAGCAGGTGTTATTGAA…
comp2267341_c0_seq1	1.4e-27	325	sp|P02690|MYP2_BOVIN	Myelin P2 protein OS=Bos taurus GN=PMP2 PE=1 SV=2	3.9e-27	321	sp|P86412|MYP2_PIG	Myelin P2 protein OS=Sus scrofa GN=PMP2 PE=1 SV=1	5e-27	320	sp|P02691|MYP2_RABIT	Myelin P2 protein OS=Oryctolagus cuniculus GN=PMP2 PE=1 SV=3				+	+		CTTTTTTTTTTCTTGTTTAATTGATGGTTCGTATTTATTTATCCATTCACCAGCTGGTCAGTCCAGCGATCTTCACATATTCGTGTAACTCAAGCACACACTATCAACAGAGCACCAGTAAGGCTGGAAAGTAGATATGGAATAATTGAAAAGAATCAATTTTGTGACAAATGCCATTATCATCATCTTGAGTTAATCACTGTTCAAGTAACATGAGTAATGCATTTCATTTTAATTGGTTGCACTTGAGGAATGTTTTGTGAAAATGGGAGAATTTACAAGAAACACTTCAATTAACTTGAATTAAGACCCATTTGATAAACTTAAACAAAACTGAGAGAAAACACATGAGGTCAAAAGAGCTCCATGTGCACTGAACTTGTCTTGAATCCTGATAGC…	>comp2267341_c0_seq1 CTTTTTTTTTTCTTGTTTAATTGATGGTTCGTATTTATTTATCCATTCACCAGCTGGTCAGTCCAGCGATCTTCACATATTCGTGTAACTCAAGCACACACTATCAACAGAGCACCAGTAAGGCTGGAAAGTAGATATGGAATAATTGAAAAGAATCAATTTTGTGACAAATGCCATTATCATCATCTTGAGTTAATCACTGTTCAAGTAACATGAGTAATGCATTTCATTTTAATTGGTTGCACTTGAGGAATGTTTTGTGAAAATGGGAGAATTTACAAGAAACACTTCAATTAACTTGAATTAAGACCCATTTGATAAACTTAAACAAAACTGAGAGAAAACACATGAGGTCAAAAGAGCTCCATGTGCACTGAA…
comp1838578_c0_seq1	3.3e-40	437	sp|P22761|HEMTM_HEDDI	Myohemerythrin OS=Hediste diversicolor PE=1 SV=1	1.1e-39	432	sp|P80255|HEMT2_HEDDI	Hemerythrin OS=Hediste diversicolor PE=1 SV=2	2.1e-36	401	sp|Q6W3Z9|HEMT_PARUS	Hemerythrin OS=Paraleonnates uschakovi PE=3 SV=1	+		+		++	Group_Myohemerythrin	TTACGGACCAACTGTGCTAAGCTTAAACTGATAATTTCACATACTCAGTGACTCGGGTTCAGAGCAGCTCAGCCACCATCAATCAAAATGGGTTATGATATTCCAGAGCCATTCTGCTGGGACGAGTCCTTTGCGGTCTTCTATGGGCAGTTGGACGAAGAGCACAAGAATATCTTCAAAGGCATCTTCGCCCTGGCTGCAGGAGACAATGCGGACAACCTGAAAGCTCTCATCAAGGTCACCGACGACCACTTCAAGTTTGAAGAGACCCAGATCCAGGCCTCAACCTCCTACAGCAGCGAATACGTCGGACACAAGAAGAAGCATGACGACTTCTTGGACGTCCTCAACGGACTCTCCGCCCCTGTCGGAGCTGAAAAGCTCAACTATGCCAAGGAC…	>comp1838578_c0_seq1_Group_Myohemerythrin TTACGGACCAACTGTGCTAAGCTTAAACTGATAATTTCACATACTCAGTGACTCGGGTTCAGAGCAGCTCAGCCACCATCAATCAAAATGGGTTATGATATTCCAGAGCCATTCTGCTGGGACGAGTCCTTTGCGGTCTTCTATGGGCAGTTGGACGAAGAGCACAAGAATATCTTCAAAGGCATCTTCGCCCTGGCTGCAGGAGACAATGCGGACAACCTGAAAGCTCTCATCAAGGTCACCGACGACCACTTCAAGTTTGAAGAGACCCAGATCCAGGCCTCAACCTCCTACAGCAGCGAATACGTCGGACACAAGAAGAAGCATGACGACTTCTTGGACGTCCTCAACGGACTC…
comp1326513_c0_seq1	2.1e-38	420	sp|Q5K473|HEMTM_SIPNU	Myohemerythrin OS=Sipunculus nudus PE=2 SV=2	5.5e-38	416	sp|P27686|HEMT1_PHAGO	Myohemerythrin-1 OS=Phascolopsis gouldii PE=1 SV=2	8e-37	405	sp|P02247|HEMTM_THEHE	Myohemerythrin OS=Themiste hennahi PE=1 SV=2		+			+	Group_Myohemerythrin	TAATCTATCCTCAATTGGAATCAGTAGAAACCTATCTGTTTCAAGGTTTACTAAATTCCAATTGAGGATTTTTTTAACTTCAACATGGGATTCGATATTCCAGAGCCATTTGTGTGGGACGAGTCCTTCAAAGTCTTTTATGAGACTTTAGATGAAGAGCACAGACAACTGTTCAAGGCAGTGTTCGAGGTGGCCAAGGACCCTTCCTCAGCTGACTCCCTCAAGAGTCTGGTGGATGTGACGGAAAAGCACTTCACTGATGAGGAGGAAATGATGTCCACAGCGAAGTATGAAGAAATTGGCCCCCACAAATCTGCCCACAATGAATTCCTGGGAAAAATCAAGAAATTGAGTGCCCCCGTGGATGAGAAAACTGTCAGCTATGCCAAGGACTGGCTG…	>comp1326513_c0_seq1_Group_Myohemerythrin TAATCTATCCTCAATTGGAATCAGTAGAAACCTATCTGTTTCAAGGTTTACTAAATTCCAATTGAGGATTTTTTTAACTTCAACATGGGATTCGATATTCCAGAGCCATTTGTGTGGGACGAGTCCTTCAAAGTCTTTTATGAGACTTTAGATGAAGAGCACAGACAACTGTTCAAGGCAGTGTTCGAGGTGGCCAAGGACCCTTCCTCAGCTGACTCCCTCAAGAGTCTGGTGGATGTGACGGAAAAGCACTTCACTGATGAGGAGGAAATGATGTCCACAGCGAAGTATGAAGAAATTGGCCCCCACAAATCTGCCCACAATGAATTCCTGGGAAAAATCAAGAAATTGAGTGCC…
comp2271225_c0_seq5	6.5e-51	538	sp|P05945|MLE_TODPA	Myosin catalytic light chain LC-1, mantle muscle OS=Todarodes pacificus PE=1 SV=2	2.8e-50	532	sp|P07291|MLE_ARGIR	Myosin essential light chain, striated adductor muscle OS=Argopecten irradians PE=1 SV=2	4.6e-50	530	sp|P07290|MLE_MIZYE	Myosin, essential light chain, adductor muscle OS=Mizuhopecten yessoensis PE=1 SV=1	+		+		++	Group_Myosin	ATTGTTTCGTTGTTAACAAGGTCAACCATTTTATTGATACACAGGATTTGGACTATCCACAGAAAATGACGGCTGCAATAATTATGAGAGCGTATAATGACTGAGAGTGCGAATGGCGTACGATGTTCCCGGAAAAAGAGACCCGCCAAAGTCCCTTAGTCCAGGTCAGTCTGAGACTGGTAGTCATAGACTGGTAGTCAAAACAGCTACATAAACTTCCTAGGCAGATTCTTGTAGCTTTTTGAATGATCTTATATTTACACAGCAGGTAATTGTTCTTTTTGTTCTTATTTTTCTTCGCGAAGCACTCAATTTGATCTTACGAGTATTTTCTTGTTTCATTTCATCGATATAATGTTCTTGATTATGAAAGTTGGTGTTACATACTTCCATATCAGA…	>comp2271225_c0_seq5_Group_Myosin ATTGTTTCGTTGTTAACAAGGTCAACCATTTTATTGATACACAGGATTTGGACTATCCACAGAAAATGACGGCTGCAATAATTATGAGAGCGTATAATGACTGAGAGTGCGAATGGCGTACGATGTTCCCGGAAAAAGAGACCCGCCAAAGTCCCTTAGTCCAGGTCAGTCTGAGACTGGTAGTCATAGACTGGTAGTCAAAACAGCTACATAAACTTCCTAGGCAGATTCTTGTAGCTTTTTGAATGATCTTATATTTACACAGCAGGTAATTGTTCTTTTTGTTCTTATTTTTCTTCGCGAAGCACTCAATTTGATCTTACGAGTATTTTCTTGTTTCATTTCATCGATATAATGTTCTTGAT…
comp2274909_c0_seq7	0	4418	sp|P24733|MYS_ARGIR	Myosin heavy chain, striated muscle OS=Argopecten irradians PE=1 SV=1	0	3826	sp|P05661|MYSA_DROME	Myosin heavy chain, muscle OS=Drosophila melanogaster GN=Mhc PE=1 SV=4	0	3538	sp|P02565|MYH1B_CHICK	Myosin-1B OS=Gallus gallus GN=MYH1B PE=2 SV=3		+			+	Group_Myosin	GAAGGGGTGTAGCAAGTTGGCAGAGGGGCCCAGGCCTGCTAACCTTGCAGGTATATAAGCCAGGGTAGGTGGGAGCCAGGTACAGAACAGCTTTTGATCTCCGATCTAGAGCTGCTTCTGCGCAGGTGCCTGACCTTGTGTCATTGTTCTCAGCGTCTGACTTGCACCCTTTCGCCAGATTTCGTTTTTTGAGAAGGGCTTAGGGCCCCCAACACACACACAACATGTCATACGACGCATCAGACCCAGATTACCAGTATCTGGCCGTGGACAAGAAGGCCTTGCTCAAGAAGCAGGCTGAAGCCGGAGACACCAAGAAGATGTGCTTCGTCCCCGACGAGAAGGACGGATGGATGAAGGGAGAGATCCAGAGCACCAAGGGAGACGACGTCGTCGTCC…	>comp2274909_c0_seq7_Group_Myosin GAAGGGGTGTAGCAAGTTGGCAGAGGGGCCCAGGCCTGCTAACCTTGCAGGTATATAAGCCAGGGTAGGTGGGAGCCAGGTACAGAACAGCTTTTGATCTCCGATCTAGAGCTGCTTCTGCGCAGGTGCCTGACCTTGTGTCATTGTTCTCAGCGTCTGACTTGCACCCTTTCGCCAGATTTCGTTTTTTGAGAAGGGCTTAGGGCCCCCAACACACACACAACATGTCATACGACGCATCAGACCCAGATTACCAGTATCTGGCCGTGGACAAGAAGGCCTTGCTCAAGAAGCAGGCTGAAGCCGGAGACACCAAGAAGATGTGCTTCGTCCCCGACGAGAAGGACGGATGGATGAAGGGAGAG…
gnl_Pdu_trscr_assembly_1_15590	1.1e-108	1094	sp|P24733|MYS_ARGIR	Myosin heavy chain, striated muscle OS=Argopecten irradians PE=1 SV=1	2.5e-94	960	sp|P12844|MYO3_CAEEL	Myosin-3 OS=Caenorhabditis elegans GN=myo-3 PE=2 SV=1	1.8e-93	952	sp|Q60LV4|MYO3_CAEBR	Myosin-3 OS=Caenorhabditis briggsae GN=myo-3 PE=3 SV=1		+			+	Group_Myosin	GGGATCTTTTGATCTCCGATCTAGAGCTGCTTCTGCGCAGGTGCCTGACCTTGTGTCATTGTTCTCAGCGTCTGACTTGCACCCTTTCGCCAGATTTCGTTTTTTGAGAAGGGCTTAGGGCCCCCAACACACACACAACATGTCATACGACGCATCAGACCCAGATTACCAGTATCTGGCCGTGGACAAGAAGGCCTTGCTCAAGAAGCAGGCTGAAGCCGGAGACACCAAGAAGATGTGCTTCGTCCCCGACGAGAAGGACGGATGGATGAAGGGAGAGATCCAGAGCACCAAGGGAGACGACGTCGTCGTCCTCATGGACAAAGGAGGAGAGGTCACAGTGAAGAAGGACAAGGTCCAGCAGATGAACCCTCCCAAGTTCGAGATGATTGAAGACAT…	>gnl_Pdu_trscr_assembly_1_15590_Group_Myosin GGGATCTTTTGATCTCCGATCTAGAGCTGCTTCTGCGCAGGTGCCTGACCTTGTGTCATTGTTCTCAGCGTCTGACTTGCACCCTTTCGCCAGATTTCGTTTTTTGAGAAGGGCTTAGGGCCCCCAACACACACACAACATGTCATACGACGCATCAGACCCAGATTACCAGTATCTGGCCGTGGACAAGAAGGCCTTGCTCAAGAAGCAGGCTGAAGCCGGAGACACCAAGAAGATGTGCTTCGTCCCCGACGAGAAGGACGGATGGATGAAGGGAGAGATCCAGAGCACCAAGGGAGACGACGTCGTCGTCCTCATGGACAAAGGAGGAGAGGTCACAGTGAAGAAGGACAA…
comp2261379_c0_seq1	2.1e-61	637	sp|P80164|MLR_LUMTE	Myosin regulatory light chain, striated muscle, 25 kDa isoform OS=Lumbricus terrestris PE=1 SV=1	1.5e-38	428	sp|P08051|MLR_SPISA	Myosin regulatory light chain, smooth muscle OS=Spisula sachalinensis PE=1 SV=1	2.4e-38	426	sp|P13543|MLR_ARGIR	Myosin regulatory light chain, striated adductor muscle OS=Argopecten irradians PE=1 SV=3	+		+		++	Group_Myosin	TTTTTTTTTTTTTTTTTTTCACAGGCAGCAATTTTTTTATTTTGTATAAAATCTACAAACAGCCCGACATTTTCACCTCCTATAGAGAGCTCTTTAGAGAGCTTTTAATCTATTCTACTTTCATTCAGAAATATCTTCACCCAACACGAATAAACAGTAATTGATGCTACAGATAAATATAGTTCTGGACAGGTCATTTGTAGAGAATTGAGATTCAATCAAGTTGTTTCCACATAAATATATCTACCTACTCGGATGTGGTGTTATACGCCGATGTAGGACCCAAGATGTTATAATATTTCGCGAGCCTCATCAGATTGTAACAGAGGCGCATAGAAGAAAAAAGGGCAATACAAGATCACCCGGTTAAAAAGAAAAAGGCGACTACAAGGTGACTAA…	>comp2261379_c0_seq1_Group_Myosin TTTTTTTTTTTTTTTTTTTCACAGGCAGCAATTTTTTTATTTTGTATAAAATCTACAAACAGCCCGACATTTTCACCTCCTATAGAGAGCTCTTTAGAGAGCTTTTAATCTATTCTACTTTCATTCAGAAATATCTTCACCCAACACGAATAAACAGTAATTGATGCTACAGATAAATATAGTTCTGGACAGGTCATTTGTAGAGAATTGAGATTCAATCAAGTTGTTTCCACATAAATATATCTACCTACTCGGATGTGGTGTTATACGCCGATGTAGGACCCAAGATGTTATAATATTTCGCGAGCCTCATCAGATTGTAACAGAGGCGCATAGAAGAAAAAAGGGCAATACAAGATCACCCG…
comp2272463_c1_seq1	0.086	99	sp|Q0MQG6|NDUS3_PONPY	NADH dehydrogenase [ubiquinone] iron-sulfur protein 3, mitochondrial OS=Pongo pygmaeus GN=NDUFS3 PE=2 SV=1	0.087	99	sp|O75489|NDUS3_HUMAN	NADH dehydrogenase [ubiquinone] iron-sulfur protein 3, mitochondrial OS=Homo sapiens GN=NDUFS3 PE=1 SV=1	0.087	99	sp|Q0MQG8|NDUS3_PANTR	NADH dehydrogenase [ubiquinone] iron-sulfur protein 3, mitochondrial OS=Pan troglodytes GN=NDUFS3 PE=2 SV=1		+			+		AGACTTCCCTCTCTCAGGATATGTTGAACTGCGTTATGATGATGAAGTAAAGAGGGAAGTCTCGTCGAAACGGATGACCCTCAAATCCATAATCGGTTAAAATACGTCTCAAATCCGGATGGTTGGCGAAAAACACTCCGTACATGTCCCAAATCTCCCTCTCGTACCAGTCAGCTCCCTTGTAGACACTGACAGCTGACTGAATGGGCGTCAGTTCATCCGTGTATGTGTGGACTCTGATTCTTGCGTTGAATCGTAGAGACAGTAAAATGTACACGATCTCAAATCTGTTCCTCCTTGTTGGAACGTCAACCCCAGCGATGTCAGTGATGTTACTAAACTGGGCGTTGGTGTGGTCTCTCAGAAAAGACAAAACAGGAATGACTCCGTCAGGGTGGA…	>comp2272463_c1_seq1 AGACTTCCCTCTCTCAGGATATGTTGAACTGCGTTATGATGATGAAGTAAAGAGGGAAGTCTCGTCGAAACGGATGACCCTCAAATCCATAATCGGTTAAAATACGTCTCAAATCCGGATGGTTGGCGAAAAACACTCCGTACATGTCCCAAATCTCCCTCTCGTACCAGTCAGCTCCCTTGTAGACACTGACAGCTGACTGAATGGGCGTCAGTTCATCCGTGTATGTGTGGACTCTGATTCTTGCGTTGAATCGTAGAGACAGTAAAATGTACACGATCTCAAATCTGTTCCTCCTTGTTGGAACGTCAACCCCAGCGATGTCAGTGATGTTACTAAACTGGGCGTTGGTGTGGTCTCTCAGAAAAGACAAAACAG…
comp2268635_c0_seq2	1.1e-190	1857	sp|P28227|MAOX_ANAPL	NADP-dependent malic enzyme OS=Anas platyrhynchos GN=ME1 PE=1 SV=1	4.7e-190	1851	sp|P40927|MAOX_COLLI	NADP-dependent malic enzyme OS=Columba livia GN=ME1 PE=1 SV=1	1.3e-187	1828	sp|Q8BMF3|MAON_MOUSE	NADP-dependent malic enzyme, mitochondrial OS=Mus musculus GN=Me3 PE=1 SV=2		+			+		GTGCCCCAGCGATTGTTCTCAGTGGAAAAAGGCAAGCGGAGATTCGCTAAAATTACACTTGGCAATCGTTCTAGTCTAAATCCCGGCTGCTAAACAGAGCAAGACGAAAGTGAATTGGACTTGGAGTGAAACCAACAGCCGTTGACAACAGAACGAGGGAAACCAATGGAAATCAGTCGGTGATTTTGAGACATTTACAAACAAGCATTTCCCAAATCCGGGAAACCGTGTTGCAAGATGGCATTTCTAGGCAGTCTGCGATCAGCTGGTGGGAAAGTCTTTGCCCAGATCAACAAAAATCAGATTGTTCAGTCGCAACGAATCATTTCTACGTCGTCTGTTGATCAAAGCAGACAGGGCAAACATGAGAGCAAGCAGAGAAACATGGCAGCTGAGTGC…	>comp2268635_c0_seq2 GTGCCCCAGCGATTGTTCTCAGTGGAAAAAGGCAAGCGGAGATTCGCTAAAATTACACTTGGCAATCGTTCTAGTCTAAATCCCGGCTGCTAAACAGAGCAAGACGAAAGTGAATTGGACTTGGAGTGAAACCAACAGCCGTTGACAACAGAACGAGGGAAACCAATGGAAATCAGTCGGTGATTTTGAGACATTTACAAACAAGCATTTCCCAAATCCGGGAAACCGTGTTGCAAGATGGCATTTCTAGGCAGTCTGCGATCAGCTGGTGGGAAAGTCTTTGCCCAGATCAACAAAAATCAGATTGTTCAGTCGCAACGAATCATTTCTACGTCGTCTGTTGATCAAAGCAGACAGGGCAAACATGAGAGCAAGCAG…
comp2268029_c2_seq11	1.5e-25	302	sp|P53111|ARI1_YEAST	NADPH-dependent aldehyde reductase ARI1 OS=Saccharomyces cerevisiae (strain ATCC 204508 / S288c) GN=ARI1 PE=1 SV=1	1.6e-23	284	sp|Q03049|YD541_YEAST	Putative uncharacterized oxidoreductase YDR541C OS=Saccharomyces cerevisiae (strain ATCC 204508 / S288c) GN=YDR541C PE=3 SV=2	1.6e-22	275	sp|P53183|YGD9_YEAST	Putative uncharacterized oxidoreductase YGL039W OS=Saccharomyces cerevisiae (strain ATCC 204508 / S288c) GN=YGL039W PE=1 SV=1		+	+		++	Candidate NADPH-dependent aldehyde reductase	AGAGAGGCAGGATGGTTGGATGCGGTCAAAGGCTGCACTTATGTCATCCACATGGCAAGCCCCTTCCCTTCAGAAACCCCAAGTAATGAAGATGAAGTCATTAAGCCAGCAGTGGAAGGGACCCTGAAAGTGTTGCGGGCTGTCCGAGAGGTTGGAGGAGTGAAGAGGGTCGTACTGACAAGTTCTATCGCAGCAGTGTCCGGTGGTTTTAATGGAGGCACCAGACAATACACTGAGGCAGACTGGACGGACATGAGCCAAAAGGGAATGCTGCCGTACATTAAGAGCAAAGCGTTAGCTGAAAAAGCAGCCTGGGATTTTTTGAAGGACACCCCTGAAAATGAGAAGTTTGAGTTTACAGTGATCAATCCGGCTTTGGTAACAGGTCCTGCACTCTGC…	>comp2268029_c2_seq11_Candidate NADPH-dependent aldehyde reductase AGAGAGGCAGGATGGTTGGATGCGGTCAAAGGCTGCACTTATGTCATCCACATGGCAAGCCCCTTCCCTTCAGAAACCCCAAGTAATGAAGATGAAGTCATTAAGCCAGCAGTGGAAGGGACCCTGAAAGTGTTGCGGGCTGTCCGAGAGGTTGGAGGAGTGAAGAGGGTCGTACTGACAAGTTCTATCGCAGCAGTGTCCGGTGGTTTTAATGGAGGCACCAGACAATACACTGAGGCAGACTGGACGGACATGAGCCAAAAGGGAATGCTGCCGTACATTAAGAGCAAAGCGTTAGCTGAAAAAGCAGCCTGGGATTTTTTGAAGGACAC…
gnl_Pdu_trscr_assembly_1_4228	1.8e-62	688	sp|E9PAV3|NACAM_HUMAN	Nascent polypeptide-associated complex subunit alpha, muscle-specific form OS=Homo sapiens GN=NACA PE=1 SV=1	1.8e-58	651	sp|P70670|NACAM_MOUSE	Nascent polypeptide-associated complex subunit alpha, muscle-specific form OS=Mus musculus GN=Naca PE=1 SV=2	1.9e-58	647	sp|Q92954|PRG4_HUMAN	Proteoglycan 4 OS=Homo sapiens GN=PRG4 PE=1 SV=2			+		+		TCTAAGGCAAGACGCAGTGTTGGAATCAAGGATGTGCAAAATCTCCTGAGTACTCCCAGCACTCCCAAATCACCAAGATCTGCCAATGTGCGACGATTGTTGACATCTTCAACCAAGAGTCCTAAAGTTGCCTCCCCCAAGAAGATTTCCCCCAAGAAGACCTCTCCCAAGAAGACTACTCCTAAGGCATCTGCCAAGAAGACTCCAGCTTTGAAAGGAGTGCGAGAGTTGCTCAAGACACCCGCTGTCGAAGCATCTCCCAAACTTGGAGGAGTCAAGAAGATGTTGAAGACGCCCAAGGTTGCTGCCTCACCCAAGCTGAGCGGAGTCAGAAGCCTCGTTAAGACCCCCAAAGCACAAGCATCACCTAAACTGGCCGGTGTCAAGAAGTTGACCAAG…	>gnl_Pdu_trscr_assembly_1_4228 TCTAAGGCAAGACGCAGTGTTGGAATCAAGGATGTGCAAAATCTCCTGAGTACTCCCAGCACTCCCAAATCACCAAGATCTGCCAATGTGCGACGATTGTTGACATCTTCAACCAAGAGTCCTAAAGTTGCCTCCCCCAAGAAGATTTCCCCCAAGAAGACCTCTCCCAAGAAGACTACTCCTAAGGCATCTGCCAAGAAGACTCCAGCTTTGAAAGGAGTGCGAGAGTTGCTCAAGACACCCGCTGTCGAAGCATCTCCCAAACTTGGAGGAGTCAAGAAGATGTTGAAGACGCCCAAGGTTGCTGCCTCACCCAAGCTGAGCGGAGTCAGAAGCCTCGTTAAGACCCCCAAAGCACAAGCATCACC…
comp2254568_c0_seq1	3.5e-11	158	sp|Q90610|NEO1_CHICK	Neogenin (Fragment) OS=Gallus gallus PE=2 SV=1	1.2e-09	178	sp|P97798|NEO1_MOUSE	Neogenin OS=Mus musculus GN=Neo1 PE=1 SV=1	1.6e-09	177	sp|Q92859|NEO1_HUMAN	Neogenin OS=Homo sapiens GN=NEO1 PE=1 SV=2			+		+		TGAAATGTTCGGCAATTGACAGGTGTACTCAAAGCAGCAAGGTTGGGAGATCGAGCTCTTACTGCTATCTCGTAGGTTGTGTCCGGAGTCAGGTCTTTAATCATCACCAGGTGATTCCTTGTTGTCAGTTCTGATGATCTACTCGCACCAGGAGCCCGGTAAACAACTACGAAATAAATGGAGTTATCAGCAGGGTAAGGGTAGTCCCAGGCTACAACTACAGTTGTTGGTGATGTGGCATGGGCTTTCACTCCCACCGGAGCCTGTAGAGGAAATCTGACACGATCTGGGTCGGAAGTTGTGGTAGAACGTTGAACAGGAACCCCGACTCCATAGCGATTAAAGGTCCAAATATTGACGATGTACTGTGTAGAAGGCTGTAGGTTCTGTATTGTGTAC…	>comp2254568_c0_seq1 TGAAATGTTCGGCAATTGACAGGTGTACTCAAAGCAGCAAGGTTGGGAGATCGAGCTCTTACTGCTATCTCGTAGGTTGTGTCCGGAGTCAGGTCTTTAATCATCACCAGGTGATTCCTTGTTGTCAGTTCTGATGATCTACTCGCACCAGGAGCCCGGTAAACAACTACGAAATAAATGGAGTTATCAGCAGGGTAAGGGTAGTCCCAGGCTACAACTACAGTTGTTGGTGATGTGGCATGGGCTTTCACTCCCACCGGAGCCTGTAGAGGAAATCTGACACGATCTGGGTCGGAAGTTGTGGTAGAACGTTGAACAGGAACCCCGACTCCATAGCGATTAAAGGTCCAAATATTGACGATGTACTGTGTAGAAGGC…
comp2277945_c0_seq2	5.5e-21	267	sp|Q8NF91|SYNE1_HUMAN	Nesprin-1 OS=Homo sapiens GN=SYNE1 PE=1 SV=4	1.5e-20	250	sp|Q6ZWR6|SYNE1_MOUSE	Nesprin-1 OS=Mus musculus GN=Syne1 PE=1 SV=2	6.9e-13	220	sp|Q8WXH0|SYNE2_HUMAN	Nesprin-2 OS=Homo sapiens GN=SYNE2 PE=1 SV=3		+			+		CGCTTTTTTTTCTTCTATTTAAATATTTATTTCTGATTGGCCAAAATTATGACACAATGCATACATGTATATAATCATCATAATAACAACAATGATTTCAAAAGGCACAAATAGGGCATTAATTAGTTAGTAGAATAAACCTATGTGAGCATACTCATGAGGATCAGCAAAAGGGGTCGTATATTTGAGTCACAGAAGCCACCCCTAAGAGCCCTAAGGTTAGCAGGCGAGTCACAGAGATAGACACAAACACTTCATTGGGTTAATTTAGGACAGAAGTAGTAATTCGATTACTCAATTTCACGAAAAGCATCATAAGAAAGCTTACCAAAAAAATTACCCTTCTTAAAATAATGATTTCAATGATTTGAATCGGCACATGCCCAGCATGGAAACGGT…	>comp2277945_c0_seq2 CGCTTTTTTTTCTTCTATTTAAATATTTATTTCTGATTGGCCAAAATTATGACACAATGCATACATGTATATAATCATCATAATAACAACAATGATTTCAAAAGGCACAAATAGGGCATTAATTAGTTAGTAGAATAAACCTATGTGAGCATACTCATGAGGATCAGCAAAAGGGGTCGTATATTTGAGTCACAGAAGCCACCCCTAAGAGCCCTAAGGTTAGCAGGCGAGTCACAGAGATAGACACAAACACTTCATTGGGTTAATTTAGGACAGAAGTAGTAATTCGATTACTCAATTTCACGAAAAGCATCATAAGAAAGCTTACCAAAAAAATTACCCTTCTTAAAATAATGATTTCAATGATTTGAATCGGCA…
comp2204672_c0_seq1	2.3e-30	344	sp|Q1JQA5|NENF_BOVIN	Neudesin OS=Bos taurus GN=NENF PE=2 SV=1	3.8e-30	342	sp|Q6IUR5|NENF_RAT	Neudesin OS=Rattus norvegicus GN=Nenf PE=2 SV=1	7.9e-30	339	sp|Q9UMX5|NENF_HUMAN	Neudesin OS=Homo sapiens GN=NENF PE=1 SV=1			+		+		AATTTTTGTCAACATGGCCAATTTCCAAAGCTGTCTGTCACGATTTCTGCTCTTTTTTGCTGCATTCTTGTTTGTTGCGGCCTCTGAGGACACCAAACCAATCAAAGTAGATGGAAACAAAGTATTCACTGCTGAAGAAATTTCTCAATTCGATGGAAGTGATCCTGACAAGCCTCTGTACATGGCCATAAAGGGAATTGTCTTTGATGTCAGCACAGGGAAAGATTTCTATGGCAAAGGCGCGTCTTACAACGTACTAATTGGCAAAGACTCAACTAGGGCAGTCGCAAAGATGTCACTTGACCCAAGTGATCTGAATTCAGATGTGAGTGATTTAACAAGTGAGCAGTTGGAATTTCTTGACAAGATATATGAAGGAACATACAAAGCCAAATATCC…	>comp2204672_c0_seq1 AATTTTTGTCAACATGGCCAATTTCCAAAGCTGTCTGTCACGATTTCTGCTCTTTTTTGCTGCATTCTTGTTTGTTGCGGCCTCTGAGGACACCAAACCAATCAAAGTAGATGGAAACAAAGTATTCACTGCTGAAGAAATTTCTCAATTCGATGGAAGTGATCCTGACAAGCCTCTGTACATGGCCATAAAGGGAATTGTCTTTGATGTCAGCACAGGGAAAGATTTCTATGGCAAAGGCGCGTCTTACAACGTACTAATTGGCAAAGACTCAACTAGGGCAGTCGCAAAGATGTCACTTGACCCAAGTGATCTGAATTCAGATGTGAGTGATTTAACAAGTGAGCAGTTGGAATTTCTTGACAAGATATATGAAGG…
comp2278433_c0_seq2	9.3e-256	1737	sp|O15943|CADN_DROME	Neural-cadherin OS=Drosophila melanogaster GN=CadN PE=1 SV=2	5.4e-205	1375	sp|Q9VJB6|CADN2_DROME	Putative neural-cadherin 2 OS=Drosophila melanogaster GN=CadN2 PE=2 SV=3	1.5e-154	1061	sp|B8V7Q1|PCDL_ACRMI	Protocadherin-like protein OS=Acropora millepora PE=1 SV=1			+		+		GTTACCTATTGTGTCCTTTTCTTTTAAAGTTCACAGTGGATGCTTCAGTACGACTGCTGTGATTGTAGAACAGGTTGCTTTAATTGCGAAATAATTTCTGCCGAATGCACATTGTTTCCCTGTATCGTCATAGTGTGCAGACCGTGGATTTGATACAAAACTATTACTTGTAAAAACGATAAATGTCCTTTTATGATTTTGAAGATTATAAACATTTCTTTTATGCTTCTTTATCATTGAAGTCCGTTTTGGCGCAATAGATACGAAACCAATCTGTGTTATGTGTGGCAACAATGTCTTTTTAGTTTCGTAAAATTACCATGGCTTCATGAATTATGATGAGTAATGAGAATGTCATTTCTTCATTAATTTTGTAAATTAATCCGCAAAGTTCTACAC…	>comp2278433_c0_seq2 GTTACCTATTGTGTCCTTTTCTTTTAAAGTTCACAGTGGATGCTTCAGTACGACTGCTGTGATTGTAGAACAGGTTGCTTTAATTGCGAAATAATTTCTGCCGAATGCACATTGTTTCCCTGTATCGTCATAGTGTGCAGACCGTGGATTTGATACAAAACTATTACTTGTAAAAACGATAAATGTCCTTTTATGATTTTGAAGATTATAAACATTTCTTTTATGCTTCTTTATCATTGAAGTCCGTTTTGGCGCAATAGATACGAAACCAATCTGTGTTATGTGTGGCAACAATGTCTTTTTAGTTTCGTAAAATTACCATGGCTTCATGAATTATGATGAGTAATGAGAATGTCATTTCTTCATTAATTTTGTAAA…
comp2265494_c0_seq1	3.6e-93	943	sp|P42325|NCAH_DROME	Neurocalcin homolog OS=Drosophila melanogaster GN=Nca PE=1 SV=2	2e-91	927	sp|Q16982|NECX_APLCA	Neurocalcin OS=Aplysia californica PE=2 SV=2	2.9e-88	898	sp|P42324|HPCL1_CHICK	Hippocalcin-like protein 1 OS=Gallus gallus GN=HPCAL1 PE=1 SV=2			+		+		GGATTTGGTGGAGCAGCAGCATCAGCGTCAGTTTGAACACAACATGCTTCCATGGCCAGCGTCCGGCTGACATCAACATTGACGGCAGGGCTCGCGGGCACAGTTAGTGTTTAGCCCAACGAGCGGCAGGACAAATTCACCAGCGACCAGCTCTATCTTCTACGGCCACAATAGAATGTGGTGCCACAAAGGGTTACGGTGGTGCTCTGAATGTATACACTATGAATGCGAGCAGGGCAAGCCGGTGATTTATCGCTGAGCAATACGGATGGCAATAAGGCAGAGCGACTGCTGAGGAGCATTGAGACATCAAATCGGACCTACCTGGTCCACATCGGCTGACATTAGTAATCAGCTCAGAGGGACATTGCATACAGGGGAAGCTTGCTGTGTCATTGG…	>comp2265494_c0_seq1 GGATTTGGTGGAGCAGCAGCATCAGCGTCAGTTTGAACACAACATGCTTCCATGGCCAGCGTCCGGCTGACATCAACATTGACGGCAGGGCTCGCGGGCACAGTTAGTGTTTAGCCCAACGAGCGGCAGGACAAATTCACCAGCGACCAGCTCTATCTTCTACGGCCACAATAGAATGTGGTGCCACAAAGGGTTACGGTGGTGCTCTGAATGTATACACTATGAATGCGAGCAGGGCAAGCCGGTGATTTATCGCTGAGCAATACGGATGGCAATAAGGCAGAGCGACTGCTGAGGAGCATTGAGACATCAAATCGGACCTACCTGGTCCACATCGGCTGACATTAGTAATCAGCTCAGAGGGACATTGCATACAGG…
comp2279536_c0_seq1	0.02	102	sp|P10041|DL_DROME	Neurogenic locus protein delta OS=Drosophila melanogaster GN=Dl PE=1 SV=2	0.98	89	sp|O00548|DLL1_HUMAN	Delta-like protein 1 OS=Homo sapiens GN=DLL1 PE=1 SV=2	0.994	85	sp|P97677|DLL1_RAT	Delta-like protein 1 OS=Rattus norvegicus GN=Dll1 PE=1 SV=1		+			+		GGTCTATTTGGAAGCTGGCACACATTATCTATGCCAATGGGTCAGAGGACAGGCTAATACACAGTTCAGCTTTGTCAGAAGTCATAAATGTGATCTATTGGGCTCTATGTACATCATAAAGTGTATACATCATTTGTTTAACATCTTTTAACATTGTTTTGGGAGTCAATTACAGGGATTAAAACCTGTTGAAAAGGTTGAAAGCTGTTCAACATGGCTTTTCTGATCAAAGCCATATTCCTCAGCACTTTGATCGCCACCATATGGGCGGATGCTCATATCTTCTTGAAGTTCATCTACTTCGAGAACCCACTGGGGGTCGATATGCGCAAAGAATGTTGCGACCATTCAATTGGGAAACTATTCTGCAAGGAGAAGGGGTGCGACCACATGTTCACC…	>comp2279536_c0_seq1 GGTCTATTTGGAAGCTGGCACACATTATCTATGCCAATGGGTCAGAGGACAGGCTAATACACAGTTCAGCTTTGTCAGAAGTCATAAATGTGATCTATTGGGCTCTATGTACATCATAAAGTGTATACATCATTTGTTTAACATCTTTTAACATTGTTTTGGGAGTCAATTACAGGGATTAAAACCTGTTGAAAAGGTTGAAAGCTGTTCAACATGGCTTTTCTGATCAAAGCCATATTCCTCAGCACTTTGATCGCCACCATATGGGCGGATGCTCATATCTTCTTGAAGTTCATCTACTTCGAGAACCCACTGGGGGTCGATATGCGCAAAGAATGTTGCGACCATTCAATTGGGAAACTATTCTGCAAGGAGAAG…
comp2263667_c0_seq1	2.1e-57	610	sp|P36609|NCS2_CAEEL	Neuronal calcium sensor 2 OS=Caenorhabditis elegans GN=ncs-2 PE=2 SV=2	9.3e-48	520	sp|Q7SY75|NCALD_XENLA	Neurocalcin-delta OS=Xenopus laevis GN=ncald PE=2 SV=1	9.3e-48	520	sp|B3DLU1|NCALD_XENTR	Neurocalcin-delta OS=Xenopus tropicalis GN=ncald PE=2 SV=1			+	+	++		TGGTCTTTTGTTTTTATCTAATCTTTTTATTTTACATATTTTATAGGACAATACATAAATAAAATATTGAAGTTGAAAAGGATGTTATTCTTGTAGATCAAGACTGCACTGGGAAAAGCCCCAAAGGAGAAATATTGTTTCGGGAAAATTACCGTGGAGAGTTATTTTAATTAAATGTCTAGGGAATTCCTTCCAAGAAAATTCAACATCAATAAGTTCACATGCAATTATTCTACAAAATCTAGAAAAGAAAAACGTTTGATTCATGTTATATTGCGTCCAACTATTACCTGCGTTAATATAATATTGGTTATTGAAGTACAATGTAGATATACATTGTAGATATACATTGATTTATCATGGAATATTTAAGGTTTATTGCAAAATTCGAAAGGGCAA…	>comp2263667_c0_seq1 TGGTCTTTTGTTTTTATCTAATCTTTTTATTTTACATATTTTATAGGACAATACATAAATAAAATATTGAAGTTGAAAAGGATGTTATTCTTGTAGATCAAGACTGCACTGGGAAAAGCCCCAAAGGAGAAATATTGTTTCGGGAAAATTACCGTGGAGAGTTATTTTAATTAAATGTCTAGGGAATTCCTTCCAAGAAAATTCAACATCAATAAGTTCACATGCAATTATTCTACAAAATCTAGAAAAGAAAAACGTTTGATTCATGTTATATTGCGTCCAACTATTACCTGCGTTAATATAATATTGGTTATTGAAGTACAATGTAGATATACATTGTAGATATACATTGATTTATCATGGAATATTTAAGGTTTA…
comp2273249_c0_seq4	1.5e-16	172	sp|Q5G269|NETR_PONPY	Neurotrypsin OS=Pongo pygmaeus GN=PRSS12 PE=3 SV=1	1.9e-16	172	sp|Q5G265|NETR_SAGLB	Neurotrypsin OS=Saguinus labiatus GN=PRSS12 PE=3 SV=1	3e-16	172	sp|Q5G271|NETR_PANTR	Neurotrypsin OS=Pan troglodytes GN=PRSS12 PE=3 SV=1			+		+		GGACTCCAGAGTGATTTTCAAGGGTGCTGGATTGCTTGTTCTGAATTGCTTGTGCTGAATTGCCCAGTTTGGGTGTGGATAGAACCATGGGTACGCTTCAGCACCCTTGGTCACATGGTCTCTTTTGGCGGGCATAGATAAGTCCTAGGGTAGGGGTAGGGCTTGCAGTCATCCAGGGACTCTGGGGCAGGCAAGATGCAGGCAGCTCTGTTAGTTTTACTGTTGGGAGCCACTGCTGTGGTGGCTCAGGAGGGCAACGTTGTCAATCCTGATGCCTGCGGTGGTCCACTTGATGTTGTCTTCGTGGTGGATTCTTCCGGATCTATCCAGGAACAGGACTCAGCAGGATGGGAGCGAGTGAAGACCTTCATCACCGAGGTCACGAGGTTCTTCACGATC…	>comp2273249_c0_seq4 GGACTCCAGAGTGATTTTCAAGGGTGCTGGATTGCTTGTTCTGAATTGCTTGTGCTGAATTGCCCAGTTTGGGTGTGGATAGAACCATGGGTACGCTTCAGCACCCTTGGTCACATGGTCTCTTTTGGCGGGCATAGATAAGTCCTAGGGTAGGGGTAGGGCTTGCAGTCATCCAGGGACTCTGGGGCAGGCAAGATGCAGGCAGCTCTGTTAGTTTTACTGTTGGGAGCCACTGCTGTGGTGGCTCAGGAGGGCAACGTTGTCAATCCTGATGCCTGCGGTGGTCCACTTGATGTTGTCTTCGTGGTGGATTCTTCCGGATCTATCCAGGAACAGGACTCAGCAGGATGGGAGCGAGTGAAGACCTTCATCACCGAG…
comp2272491_c1_seq4	1.4e-153	806	sp|Q14112|NID2_HUMAN	Nidogen-2 OS=Homo sapiens GN=NID2 PE=1 SV=3	1.1e-144	755	sp|B5DFC9|NID2_RAT	Nidogen-2 OS=Rattus norvegicus GN=Nid2 PE=2 SV=1	9.6e-134	653	sp|O88322|NID2_MOUSE	Nidogen-2 OS=Mus musculus GN=Nid2 PE=1 SV=2			+		+		CTAGTTAGTGATCCTTTTATTTGTTAAATTCTAAACATTGATCAATGTCTCTCATTTTGATTCAACCATATGTGGCAGTGGGAATATTACATTTGACTAGAGGTGATTAGCGTGTTAATAAAGGCTGCGCAAGATTTATTGATTAAATTAAAATTCAGGCTTATTTTCATTTGATATTTTGAAAGTGTGCGTACTTGGCCAATTCTAGAGTTCTGAGCAGAAACCCTAGTTGGCGGGATATTTTAATCACAATATTCATATAACTCATGGATCATATAAACGTAAAGAAACTGGTTTTAAAAATCTACAAACACATTTGAAATCACATGCATCTCATACTATACAAACATCTACCTATCAAACACTCTTCACAAATTGCAATGTACATTTAAAGAAAGA…	>comp2272491_c1_seq4 CTAGTTAGTGATCCTTTTATTTGTTAAATTCTAAACATTGATCAATGTCTCTCATTTTGATTCAACCATATGTGGCAGTGGGAATATTACATTTGACTAGAGGTGATTAGCGTGTTAATAAAGGCTGCGCAAGATTTATTGATTAAATTAAAATTCAGGCTTATTTTCATTTGATATTTTGAAAGTGTGCGTACTTGGCCAATTCTAGAGTTCTGAGCAGAAACCCTAGTTGGCGGGATATTTTAATCACAATATTCATATAACTCATGGATCATATAAACGTAAAGAAACTGGTTTTAAAAATCTACAAACACATTTGAAATCACATGCATCTCATACTATACAAACATCTACCTATCAAACACTCTTCACAAATTG…
comp2252506_c0_seq1				no significant hit									+	+			++	candidate_unknown		>comp2252506_c0_seq1_candidate_unknown
comp2254641_c1_seq1				no significant hit										+	+		++	candidate_unknown		>comp2254641_c1_seq1_candidate_unknown
comp2138952_c0_seq1				no significant hit										+			+			>comp2138952_c0_seq1
comp2254677_c0_seq1				no significant hit										+			+			>comp2254677_c0_seq1
comp2279340_c0_seq1				no significant hit										+			+			>comp2279340_c0_seq1
comp2262360_c0_seq1				no significant hit											+		+			>comp2262360_c0_seq1
comp2268336_c1_seq1				no significant hit												+	+			>comp2268336_c1_seq1
comp2256095_c0_seq1				no significant hit										+			+			>comp2256095_c0_seq1
comp2261334_c1_seq1	1.6e-197	1850	sp|Q5JPE7|NOMO2_HUMAN	Nodal modulator 2 OS=Homo sapiens GN=NOMO2 PE=1 SV=1	7.7e-190	1849	sp|P69849|NOMO3_HUMAN	Nodal modulator 3 OS=Homo sapiens GN=NOMO3 PE=3 SV=2	4.3e-189	1842	sp|Q15155|NOMO1_HUMAN	Nodal modulator 1 OS=Homo sapiens GN=NOMO1 PE=1 SV=5	+		+		++	Candidate_Nodal_modulator	TAAGCCAATCCAGTCGCTTATTCAGTTTGGGTAAACAACTCCCTCTTGGTTACACTACATGGGCCAAATCTGACCTTTCAAAGTTCTGTTGAAACAATTCACATGAATACGGAATTATTCAATTGTATTACAATTGTATTTTTATCAAAATTTCATTTAAAGTTCTTTCAATTAAATTGTATCTTAAAGTCTAACTTACAGTCGATACATTAACAGACAGGTATTCAATAAAACAAATTAAAACTATTCCAATTAACAGCTGAGACAATTCAAATTCAATTTTTTTCACTAAGATTTTTTAGAACAGTTACAAAACTCGGTAAGTAAACAATAAAGTTTGGAAACATCTTCCTTCAAGTGAGGAAATAGGAATCCTGAAAATCACAAATAATAAACTAC…	>comp2261334_c1_seq1_Candidate_Nodal_modulator TAAGCCAATCCAGTCGCTTATTCAGTTTGGGTAAACAACTCCCTCTTGGTTACACTACATGGGCCAAATCTGACCTTTCAAAGTTCTGTTGAAACAATTCACATGAATACGGAATTATTCAATTGTATTACAATTGTATTTTTATCAAAATTTCATTTAAAGTTCTTTCAATTAAATTGTATCTTAAAGTCTAACTTACAGTCGATACATTAACAGACAGGTATTCAATAAAACAAATTAAAACTATTCCAATTAACAGCTGAGACAATTCAAATTCAATTTTTTTCACTAAGATTTTTTAGAACAGTTACAAAACTCGGTAAGTAAACAATAAAGTTTGGAAACATCTTCC…
comp2274581_c1_seq21	0.998	67	sp|Q85424|NSP6_ROTRA	Non-structural protein 6 OS=Rotavirus A (strain RVA/Rabbit/United States/ALA/XXXX/G3P11[14]) PE=3 SV=2	0.99991	93	sp|Q9H6N6|MYH16_HUMAN	Putative uncharacterized protein MYH16 OS=Homo sapiens GN=MYH16 PE=1 SV=2						+			+		AACAACCACAAAGAAAAGAAGAGTGTGACACTGAGTCACAATGTTTGCTGACATGGCTCGATGTATGAGCGGCATAAACAGGGTGAATGCTCAAAGCAAAAATTATATTTTTGTCCAACAACAAACACATTGGTTCCGGATCGCCACCCTCTGTTGCTTGCAAAGACACTTTAGAGAAGATCCAACACCCACATAAAACAGATCACAGCACACCAGCAAAATGAACAGGGCAGTCCTACTTTGTTTTGCTATCTCATTTATAGCTATAACCCATGGCAGCAAAATTGAAGACCTGCTAAAAGAACTGAAAAGGAAGACTTTGGAAAAGAGGCAAGAGCCTAAACAGCCGGAAGAGGCATGTGATGCAACTGCGGCCTTCGTGAAATGTCATAAAAAAGC…	>comp2274581_c1_seq21 AACAACCACAAAGAAAAGAAGAGTGTGACACTGAGTCACAATGTTTGCTGACATGGCTCGATGTATGAGCGGCATAAACAGGGTGAATGCTCAAAGCAAAAATTATATTTTTGTCCAACAACAAACACATTGGTTCCGGATCGCCACCCTCTGTTGCTTGCAAAGACACTTTAGAGAAGATCCAACACCCACATAAAACAGATCACAGCACACCAGCAAAATGAACAGGGCAGTCCTACTTTGTTTTGCTATCTCATTTATAGCTATAACCCATGGCAGCAAAATTGAAGACCTGCTAAAAGAACTGAAAAGGAAGACTTTGGAAAAGAGGCAAGAGCCTAAACAGCCGGAAGAGGCATGTGATGCAACTGCGGCCT…
comp2258193_c0_seq1	5.3e-56	586	sp|P19804|NDKB_RAT	Nucleoside diphosphate kinase B OS=Rattus norvegicus GN=Nme2 PE=1 SV=1	8.6e-56	584	sp|P22392|NDKB_HUMAN	Nucleoside diphosphate kinase B OS=Homo sapiens GN=NME2 PE=1 SV=1	8.6e-56	584	sp|Q01768|NDKB_MOUSE	Nucleoside diphosphate kinase B OS=Mus musculus GN=Nme2 PE=1 SV=1			+		+		TTTTTTTTTTTTTTTTTTTATATGTAGACAATTTAATATCACATGATGATGGCACTCAGTCGAACACAAGTCAACCGCAGGGAAGCTGTGAAGTGAAAATTTTGAACTTGAGATGATAATATAAGTGAGAGGTATATATTATAGTGTCTGAAATAAATGCACAGAATTCACTGAAGTTGTTCAATGATTCATGGTAAAGTATGACATCCGAATAACTTATACATCATGGTCACAGTCACACAATTGCCTAGTGTTGGTCTGCTCATAACTTGGCTGCTTTCGGAGTTCATTCTACAATCCAGGGCTGGGAGACGGGCTTCCAGGCTTGTAGTTCTTCTGGCTTGAACCAGAGGGCGATCTCCTTCTCTGCGCTCTCAACGGCGTCACTTCCGTGGCAGA…	>comp2258193_c0_seq1 TTTTTTTTTTTTTTTTTTTATATGTAGACAATTTAATATCACATGATGATGGCACTCAGTCGAACACAAGTCAACCGCAGGGAAGCTGTGAAGTGAAAATTTTGAACTTGAGATGATAATATAAGTGAGAGGTATATATTATAGTGTCTGAAATAAATGCACAGAATTCACTGAAGTTGTTCAATGATTCATGGTAAAGTATGACATCCGAATAACTTATACATCATGGTCACAGTCACACAATTGCCTAGTGTTGGTCTGCTCATAACTTGGCTGCTTTCGGAGTTCATTCTACAATCCAGGGCTGGGAGACGGGCTTCCAGGCTTGTAGTTCTTCTGGCTTGAACCAGAGGGCGATCTCCTTCTCTGCGCTCTCAA…
comp2278605_c1_seq8	3.4e-182	800	sp|A8DYP0|OBSCN_DROME	Obscurin OS=Drosophila melanogaster GN=Unc-89 PE=1 SV=1	7.5e-165	677	sp|O01761|UNC89_CAEEL	Muscle M-line assembly protein unc-89 OS=Caenorhabditis elegans GN=unc-89 PE=1 SV=3	1e-154	710	sp|Q5VST9|OBSCN_HUMAN	Obscurin OS=Homo sapiens GN=OBSCN PE=1 SV=3		+			+		GCCTCGAACATTCTGATAATGTGCTCTTGGCGGACGTTCTTCAACATGTCGTATTCTCTCAAACTCTCCTCAGGTTTCCTTGAGTCATATGGGATGATCTTCGCCACCTGTTTGGCTTTGCCTTTGAGAGGTTTGACGTTGCGGATGAGTGTGAAACGTCCTCTCCATACTTCTGAGCCAAAAGAAAGGAATTTGGCGGGGTCGATCTCTTGCAAGTGGATTTCTCTGTCCATGAATTCATAATAGTCCTTCTTCTTCTTGTCCGTGAGTTCGCTCAAACTCAACTCCGCCTCCTCTTCCAGAGAGCCTCGGCGACTGCTGGATGGGCTTGGATCAGGAGAAGGTTTGTTGGTAGCCTGTCGAGATCTGAGAAGGATCTTCTTGGTTTCAGCATCAATG…	>comp2278605_c1_seq8 GCCTCGAACATTCTGATAATGTGCTCTTGGCGGACGTTCTTCAACATGTCGTATTCTCTCAAACTCTCCTCAGGTTTCCTTGAGTCATATGGGATGATCTTCGCCACCTGTTTGGCTTTGCCTTTGAGAGGTTTGACGTTGCGGATGAGTGTGAAACGTCCTCTCCATACTTCTGAGCCAAAAGAAAGGAATTTGGCGGGGTCGATCTCTTGCAAGTGGATTTCTCTGTCCATGAATTCATAATAGTCCTTCTTCTTCTTGTCCGTGAGTTCGCTCAAACTCAACTCCGCCTCCTCTTCCAGAGAGCCTCGGCGACTGCTGGATGGGCTTGGATCAGGAGAAGGTTTGTTGGTAGCCTGTCGAGATCTGAGAAGGATC…
comp2261971_c0_seq1	0.997	67	sp|Q9XZL0|CO13_CONTE	Omega-conotoxin-like TxO3 OS=Conus textile GN=TXO3 PE=2 SV=1										+			+		TCCGTTTACCTTACCCGGGCTTCTTGCCCCGACCTCCTCTATTTGACACTTCATTACAATATACAATGACCAGATAAACTTCAGCTATTTTTGAGGCCTTATAATAAATCGACGAACAAACAAAGCAAACTTTTTTGTTGCTCTAACTTTCTTTTTTGCTTTTTAAAGATTTAATGTGCAAACTGTGCATAAAAACAGACATCAGGATAAGACAGGCAATAAGTTAATTCCACCATTAAAATGCAAAAATTCCAATAAAGCAAAGAATCAATTGAAAAAAAAACATCAATTAAAATGGCCTTAATCAGAAACAAATTATCAGGGTGTTGGAAAAATGTACATGCTAAGATAAAATCTCTGAAAGTCAAAACAAAGTCTGAGTGATAGTTTAGTCCAGAT…	>comp2261971_c0_seq1 TCCGTTTACCTTACCCGGGCTTCTTGCCCCGACCTCCTCTATTTGACACTTCATTACAATATACAATGACCAGATAAACTTCAGCTATTTTTGAGGCCTTATAATAAATCGACGAACAAACAAAGCAAACTTTTTTGTTGCTCTAACTTTCTTTTTTGCTTTTTAAAGATTTAATGTGCAAACTGTGCATAAAAACAGACATCAGGATAAGACAGGCAATAAGTTAATTCCACCATTAAAATGCAAAAATTCCAATAAAGCAAAGAATCAATTGAAAAAAAAACATCAATTAAAATGGCCTTAATCAGAAACAAATTATCAGGGTGTTGGAAAAATGTACATGCTAAGATAAAATCTCTGAAAGTCAAAACAAAGTCT…
gnl_Pdu_trscr_assembly_1_11607	1.6e-104	1044	sp|P31326|OTC_LITCT	Ornithine carbamoyltransferase, mitochondrial OS=Lithobates catesbeiana PE=2 SV=1	4.7e-103	1030	sp|Q9N1U7|OTC_BOVIN	Ornithine carbamoyltransferase, mitochondrial OS=Bos taurus GN=OTC PE=2 SV=1	2.6e-102	1023	sp|O19072|OTC_PIG	Ornithine carbamoyltransferase, mitochondrial (Fragment) OS=Sus scrofa GN=OTC PE=2 SV=1			+		+		CTGCTTAAGCAGTGGTATCAACACAGAGTACGTGGGAATGATAGTAAACATGGCTGTGAGAGTTGTTTGTCAGAAAGTTTTGTCTGTTTCCAAACCAGCATCATGCAGGATCCTGATTCCCTCATTGTCTGTCTTGTGTAAGGACAGAAAGACATATAGCACTAAACCAGCATCCCTTGTTGGCAGAGACTTCTTGACCCTGAGAAATTATAGCAAAGATGAAATTGGAACGTTATTATGGACAGCCAAGGATCTCAAGACGAGAATCAAAGATAAGAAAGAGATATTCCAACCTCTCATTGGGAAAACCATATCATTAATTTTTCAAAAGAGGAGCACGAGAACCAGACTATCTTCAGAAATAGGAATGTCACTATTGGGTGGAAAAGCTTGCTTCCT…	>gnl_Pdu_trscr_assembly_1_11607 CTGCTTAAGCAGTGGTATCAACACAGAGTACGTGGGAATGATAGTAAACATGGCTGTGAGAGTTGTTTGTCAGAAAGTTTTGTCTGTTTCCAAACCAGCATCATGCAGGATCCTGATTCCCTCATTGTCTGTCTTGTGTAAGGACAGAAAGACATATAGCACTAAACCAGCATCCCTTGTTGGCAGAGACTTCTTGACCCTGAGAAATTATAGCAAAGATGAAATTGGAACGTTATTATGGACAGCCAAGGATCTCAAGACGAGAATCAAAGATAAGAAAGAGATATTCCAACCTCTCATTGGGAAAACCATATCATTAATTTTTCAAAAGAGGAGCACGAGAACCAGACTATCTTCAGAAATAGGA…
comp2272691_c0_seq4	4.5e-249	2408	sp|O96064|MYSP_MYTGA	Paramyosin OS=Mytilus galloprovincialis PE=2 SV=1	1.8e-220	2138	sp|P35418|MYSP_TAESO	Paramyosin OS=Taenia solium GN=PMY PE=1 SV=2	3.8e-220	2135	sp|Q8T305|MYSP_TAESA	Paramyosin OS=Taenia saginata GN=PMY PE=2 SV=1		+			+		TTTTTTTTTTTTTTTTTTTTTTAGAAAAATTAGAGCAGGTTTATTCCATCCATCATGGCCATGATGATATTCTTTCACCCGTTGCAACTGGTGTTGTTTTAATTCGTCATTACAGTTTTCACATAGATTGTAACAAGACAACTGATGCACATGTGATCATTCTTAATAGTGGTTGCTATTGGCAACAGCATCATCAGCTGATTACACGCGTATACACATTGATAAAAAAAACATCAACAATAAAGAATTCCTTTCGGAAACTGAACAATAATACAATTAATAGTTTAGCATAACAGCAGTACGCAGGCGATTTTAGACTACCAGCAAACGTCTCCGCATCTCAATATTCTACGGACAAATCAACAATCCGACTGGAAGACTTAAAAAGCTTCCAAGTCC…	>comp2272691_c0_seq4 TTTTTTTTTTTTTTTTTTTTTTAGAAAAATTAGAGCAGGTTTATTCCATCCATCATGGCCATGATGATATTCTTTCACCCGTTGCAACTGGTGTTGTTTTAATTCGTCATTACAGTTTTCACATAGATTGTAACAAGACAACTGATGCACATGTGATCATTCTTAATAGTGGTTGCTATTGGCAACAGCATCATCAGCTGATTACACGCGTATACACATTGATAAAAAAAACATCAACAATAAAGAATTCCTTTCGGAAACTGAACAATAATACAATTAATAGTTTAGCATAACAGCAGTACGCAGGCGATTTTAGACTACCAGCAAACGTCTCCGCATCTCAATATTCTACGGACAAATCAACAATCCGACTGGAAG…
comp2275822_c0_seq10	2.4e-13	151	sp|Q66HS7|PDLI3_RAT	PDZ and LIM domain protein 3 OS=Rattus norvegicus GN=Pdlim3 PE=1 SV=2	4.8e-13	144	sp|Q6QGC0|PDLI3_PIG	PDZ and LIM domain protein 3 OS=Sus scrofa GN=PDLIM3 PE=2 SV=1	1.2e-12	214	sp|Q9JKS4|LDB3_MOUSE	LIM domain-binding protein 3 OS=Mus musculus GN=Ldb3 PE=1 SV=1		+			+	Group_PDZ_and_LIM_domain_protein	CTTTTTTTGTGTTTTTCTTTAAATTTATTTCAGTAGGATTTATAAATACAGTGCATATTTACAATGACGTTCCAACATTTTGGGAGAATTGGCACATACCATTTGAAGGCACTTTCTTTTCACAAAAGATTAAGAACTTTGGTATTTCATAAATATCCAATTTTCAAGCTTCAAAACAAGGAGGAATATATATCACAGAAATATACAGAGGCTCAACGACCGATGAATTAAGATATGCAAACAGTCTTAAACAATATGAATACAAATCGAATATGAGGATGAAGAGAAAAAAATGTTCCGAGAAAAAAAATGTTTCGAGAAAGAGACCCGGGTTATATATACATCATGAACATTTGCCAGTTGCAACAGAGTTGGCTTCAACGCATAAAATATGAAGAT…	>comp2275822_c0_seq10_Group_PDZ_and_LIM_domain_protein CTTTTTTTGTGTTTTTCTTTAAATTTATTTCAGTAGGATTTATAAATACAGTGCATATTTACAATGACGTTCCAACATTTTGGGAGAATTGGCACATACCATTTGAAGGCACTTTCTTTTCACAAAAGATTAAGAACTTTGGTATTTCATAAATATCCAATTTTCAAGCTTCAAAACAAGGAGGAATATATATCACAGAAATATACAGAGGCTCAACGACCGATGAATTAAGATATGCAAACAGTCTTAAACAATATGAATACAAATCGAATATGAGGATGAAGAGAAAAAAATGTTCCGAGAAAAAAAATGTTTCGAGAAAGAGACCCGGGTTATATATACAT…
comp2273193_c0_seq1	2.1e-08	172	sp|Q96HC4|PDLI5_HUMAN	PDZ and LIM domain protein 5 OS=Homo sapiens GN=PDLIM5 PE=1 SV=5	3.5e-08	165	sp|A1ZA47|ZASP_DROME	PDZ and LIM domain protein Zasp OS=Drosophila melanogaster GN=Zasp52 PE=1 SV=2	4.9e-08	166	sp|Q679P3|PDLI7_CHICK	PDZ and LIM domain protein 7 OS=Gallus gallus GN=PDLIM7 PE=1 SV=1	+		+	+	+++	Group_PDZ_and_LIM_domain_protein	CAGATGTGGGTGGCATCAGACGTAGGTTTGGACCGCCTGAAGTTTTTGTTTATCACACATGTTCGGGTGGGTGATGGGAATAGTTGAGGTTTTTTCTGTTGTGGAGCTTCCCTGATGCATGGGCGGGAGAGTCCATGCAGGGGTTCTTTCGCTGAGCACCTATTTTCCCTTATATTGACAAAGTGTTGACGCGGTCTAAACTTTTGTCTGATACTGTATATGATTGAAAGAAATGGTTTCTTCAACACAAGATCCCCAAACACAAATTTACTGTTAAATTTTCTCTAACCAAGTCATCAAACAGACTGCTTAAACTTATATGAACTGTTAATTTATTAATCATTGATCTTACTAATAGGAAATGGAAATTGTCCAGCATTGCACAAACATATATATACA…	>comp2273193_c0_seq1_Group_PDZ_and_LIM_domain_protein CAGATGTGGGTGGCATCAGACGTAGGTTTGGACCGCCTGAAGTTTTTGTTTATCACACATGTTCGGGTGGGTGATGGGAATAGTTGAGGTTTTTTCTGTTGTGGAGCTTCCCTGATGCATGGGCGGGAGAGTCCATGCAGGGGTTCTTTCGCTGAGCACCTATTTTCCCTTATATTGACAAAGTGTTGACGCGGTCTAAACTTTTGTCTGATACTGTATATGATTGAAAGAAATGGTTTCTTCAACACAAGATCCCCAAACACAAATTTACTGTTAAATTTTCTCTAACCAAGTCATCAAACAGACTGCTTAAACTTATATGAACTGTTAATTTATTAATCATTG…
comp2208474_c0_seq1	0.3	60	sp|Q95NT0|PEN4A_LITVA	Penaeidin-4a OS=Litopenaeus vannamei PE=3 SV=1	0.3	60	sp|Q963C3|PEN4C_LITVA	Penaeidin-4c OS=Litopenaeus vannamei PE=3 SV=1	0.77	55	sp|Q962A7|PEN4D_LITSE	Penaeidin-4d OS=Litopenaeus setiferus PE=1 SV=1		+	+	+	+++	Candidate_Whitnin_Proctolin	CTATTTTTGTGCTTGCTTCCTTTATTATTATTTGTCAGGGTGCACAGATGAGTAGCAGTGGAGCCAGATTGAAAAAAAAATTAAATCATCAGGAAATGCAGTGGCAATCTATCAGCATGCACAAGGCTATGGAATTTCTTTTAGGAAATACATATATTTTTTTGTATTATAACTTTAATTTCTGTACAAACCATCTGACAGCTATATCAAATATATACTCGATATGGTCGGCAGGCGTGATACTACATTCTATTACAAACACACTTGAAATTTGTGGTTCTTAAATCATATTTATAGAAGTAATCTCTCTGGTATAGTGATTGGTCTAGTCATTAGAATCAGTCGATGAACAAAAATGAGAAGATCAGAGACTTTTTATTTAAATCGATATATATATCA…	>comp2208474_c0_seq1_Candidate_Whitnin_Proctolin CTATTTTTGTGCTTGCTTCCTTTATTATTATTTGTCAGGGTGCACAGATGAGTAGCAGTGGAGCCAGATTGAAAAAAAAATTAAATCATCAGGAAATGCAGTGGCAATCTATCAGCATGCACAAGGCTATGGAATTTCTTTTAGGAAATACATATATTTTTTTGTATTATAACTTTAATTTCTGTACAAACCATCTGACAGCTATATCAAATATATACTCGATATGGTCGGCAGGCGTGATACTACATTCTATTACAAACACACTTGAAATTTGTGGTTCTTAAATCATATTTATAGAAGTAATCTCTCTGGTATAGTGATTGGTCTAGTCATTAGAATCAGTCGATGAA…
comp2241424_c0_seq3	3.8e-39	427	sp|P80311|PPIB_BOVIN	Peptidyl-prolyl cis-trans isomerase B OS=Bos taurus GN=PPIB PE=1 SV=4	4.8e-39	426	sp|P24368|PPIB_RAT	Peptidyl-prolyl cis-trans isomerase B OS=Rattus norvegicus GN=Ppib PE=1 SV=3	7.8e-39	424	sp|P24367|PPIB_CHICK	Peptidyl-prolyl cis-trans isomerase B OS=Gallus gallus GN=PPIB PE=2 SV=1	+	+			++	Group_Peptidyl-prolyl_cis-trans-isomerase	GTTTTTTTTTTTCAATATTTATATAAATTTATTGACAGATAAACATATTTGTCATAAACAATATACAACAAAAGAAGGCAACAATTTGCCATATAATTTGTAAACACAGTTACAAAATTATAAAAGATATTCTAATGACATTTTCTATATTTTGTAGCTGGTTCAAATTGACATTAACTTACTAATACCTCTCATTAGGGTTTATTTATTTTTCAGCAATTATCATTGACATTGCTTTCAAAAACAGACATTCTGAGATGTTAATTCAAGTGTCCATAAATGAAGGCTTTATAGCCAACATTATCGAATGTCTTATTAAAGTCTTTTTTGGTGTTAGATCAAGACTTTTTCTTAAGTTTCTTAAGTTTCTTAGAGTCTTTTTGGTGTTATTTGTACCCT…	>comp2241424_c0_seq3_Group_Peptidyl-prolyl_cis-trans-isomerase GTTTTTTTTTTTCAATATTTATATAAATTTATTGACAGATAAACATATTTGTCATAAACAATATACAACAAAAGAAGGCAACAATTTGCCATATAATTTGTAAACACAGTTACAAAATTATAAAAGATATTCTAATGACATTTTCTATATTTTGTAGCTGGTTCAAATTGACATTAACTTACTAATACCTCTCATTAGGGTTTATTTATTTTTCAGCAATTATCATTGACATTGCTTTCAAAAACAGACATTCTGAGATGTTAATTCAAGTGTCCATAAATGAAGGCTTTATAGCCAACATTATCGAATGTCTTATTAAAGTCTTTTTTGGTGTTA…
comp2262441_c0_seq1	3.5e-75	767	sp|P80311|PPIB_BOVIN	Peptidyl-prolyl cis-trans isomerase B OS=Bos taurus GN=PPIB PE=1 SV=4	2.5e-74	759	sp|P24369|PPIB_MOUSE	Peptidyl-prolyl cis-trans isomerase B OS=Mus musculus GN=Ppib PE=1 SV=2	3.2e-74	758	sp|P23284|PPIB_HUMAN	Peptidyl-prolyl cis-trans isomerase B OS=Homo sapiens GN=PPIB PE=1 SV=2			+		+	Group_Peptidyl-prolyl_cis-trans-isomerase	CTTTTTTTTTTTCAAAAAATTTTATTCACTCTCATGCTCTCTTCCATTCGATGATGCAAAATGACATTTTTAGACTGCATACAAATATGTTAACATTCATGAGCATTCACATATAAACGGCCAATTAATTAATTGCTACTTGTGGTACACGTATGTATATTACAGTATATATCACTGGAATGACAGTAAGTACAATTGACACTTCAGGTAATTTCCTGTAGGCTCACATTCATTGTGTAAATGCTACTTTAAATCTGGAAACTCTGGACACAAAAGTCACATAATTGTATGATGATACACTGTTAAAATGAACAAATCAAACATTTCGACTTGATATGACATTGATGTCTTGTATGAAAACAAATAATATTGGAAATAAATGAGAAAAATGCATATTTT…	>comp2262441_c0_seq1_Group_Peptidyl-prolyl_cis-trans-isomerase CTTTTTTTTTTTCAAAAAATTTTATTCACTCTCATGCTCTCTTCCATTCGATGATGCAAAATGACATTTTTAGACTGCATACAAATATGTTAACATTCATGAGCATTCACATATAAACGGCCAATTAATTAATTGCTACTTGTGGTACACGTATGTATATTACAGTATATATCACTGGAATGACAGTAAGTACAATTGACACTTCAGGTAATTTCCTGTAGGCTCACATTCATTGTGTAAATGCTACTTTAAATCTGGAAACTCTGGACACAAAAGTCACATAATTGTATGATGATACACTGTTAAAATGAACAAATCAAACATTTCGACTTGATA…
comp2261047_c0_seq1	3.8e-39	427	sp|P24367|PPIB_CHICK	Peptidyl-prolyl cis-trans isomerase B OS=Gallus gallus GN=PPIB PE=2 SV=1	1e-38	423	sp|P24368|PPIB_RAT	Peptidyl-prolyl cis-trans isomerase B OS=Rattus norvegicus GN=Ppib PE=1 SV=3	2.1e-38	420	sp|P80311|PPIB_BOVIN	Peptidyl-prolyl cis-trans isomerase B OS=Bos taurus GN=PPIB PE=1 SV=4			+	+	++	Group_Peptidyl-prolyl_cis-trans-isomerase	CGCTGCTACTCTTCAGCTCATTTCTGCAGTATAAAGTGCACAGCTGCGCCCAGAGCTGTCATCAGTTTATTAGATTAATTGGTAACATCAGGACTTATCCAGGAGCATACACTGAAGAATCCAAAATGCTGATATTGGTAGTTGCAGTGATCAGCACCTTGTCATTGGTTCACTGCGGAAACTTGACCGTGACAGAAGAAGCATGGTTTGATGTGGAAGTCAAGGATTTGGACGGTCCAGGGGAAGATTACAGGGGGCGTTTTACAGTTGCGCTCTTCGGAGACGCCGCTCCCATGACGACGTTGAATTTTGCATCCATCACAAGAGGGTACAAGAGGAAAGGGGAGAAGCTCTGGTACAAGAACACCAAAGTGCATCGCATCGTTCCGGATTTCGTGG…	>comp2261047_c0_seq1_Group_Peptidyl-prolyl_cis-trans-isomerase CGCTGCTACTCTTCAGCTCATTTCTGCAGTATAAAGTGCACAGCTGCGCCCAGAGCTGTCATCAGTTTATTAGATTAATTGGTAACATCAGGACTTATCCAGGAGCATACACTGAAGAATCCAAAATGCTGATATTGGTAGTTGCAGTGATCAGCACCTTGTCATTGGTTCACTGCGGAAACTTGACCGTGACAGAAGAAGCATGGTTTGATGTGGAAGTCAAGGATTTGGACGGTCCAGGGGAAGATTACAGGGGGCGTTTTACAGTTGCGCTCTTCGGAGACGCCGCTCCCATGACGACGTTGAATTTTGCATCCATCACAAGAGGGTACAAGA…
comp2268964_c0_seq1	1.2e-60	630	sp|P24367|PPIB_CHICK	Peptidyl-prolyl cis-trans isomerase B OS=Gallus gallus GN=PPIB PE=2 SV=1	1.5e-60	629	sp|P52013|CYP5_CAEEL	Peptidyl-prolyl cis-trans isomerase 5 OS=Caenorhabditis elegans GN=cyn-5 PE=1 SV=2	1.9e-60	628	sp|P23284|PPIB_HUMAN	Peptidyl-prolyl cis-trans isomerase B OS=Homo sapiens GN=PPIB PE=1 SV=2			+	+	++	Group_Peptidyl-prolyl_cis-trans-isomerase	TCTCCCAGCCCACAGCATCACTAGAACTCAAGAAGCCAGCATGATGATTTTAGCTACTCTGATCGCCCTCAGTGTTATAACTGGTAGTCAGCAGTCAGACACTACAGTGACAGACAAGGTGTACTTTGACATAACAATAGATGGCGAGAGTGCTGGAAGGATTGTCTTTGGCCTCTTCGGAGACACGACCCCAAGAACGGTGAAGAACTTTGTGGCTTTGGCCGACTCATCCGAGGGATATGGATACAAGGGAGCTTCATTCCACAGGGTCATCAAGGATTTCATGATCCAAGGGGGTGACTTCTCAGCCAAAGACGGCAGCGGCAGCAAGAGCATCTACGGCGACTACTTCGATGACGAGAACTTCAAAGTCAGCCATTACGGAGCAGGGTGGATCAG…	>comp2268964_c0_seq1_Group_Peptidyl-prolyl_cis-trans-isomerase TCTCCCAGCCCACAGCATCACTAGAACTCAAGAAGCCAGCATGATGATTTTAGCTACTCTGATCGCCCTCAGTGTTATAACTGGTAGTCAGCAGTCAGACACTACAGTGACAGACAAGGTGTACTTTGACATAACAATAGATGGCGAGAGTGCTGGAAGGATTGTCTTTGGCCTCTTCGGAGACACGACCCCAAGAACGGTGAAGAACTTTGTGGCTTTGGCCGACTCATCCGAGGGATATGGATACAAGGGAGCTTCATTCCACAGGGTCATCAAGGATTTCATGATCCAAGGGGGTGACTTCTCAGCCAAAGACGGCAGCGGCAGCAAGAGCAT…
comp2261355_c0_seq1	9.3e-59	612	sp|Q00688|FKBP3_HUMAN	Peptidyl-prolyl cis-trans isomerase FKBP3 OS=Homo sapiens GN=FKBP3 PE=1 SV=1	4e-58	606	sp|O46638|FKBP3_RABIT	Peptidyl-prolyl cis-trans isomerase FKBP3 OS=Oryctolagus cuniculus GN=FKBP3 PE=2 SV=2	1.7e-57	600	sp|P26884|FKBP3_BOVIN	Peptidyl-prolyl cis-trans isomerase FKBP3 OS=Bos taurus GN=FKBP3 PE=1 SV=2		+			+	Group_Peptidyl-prolyl_cis-trans-isomerase	TTTTTTTTTTTTTTTTTTTGTTTTAAAGTTTTTTTAATCATCGCAACAAAGTTTTCAATACACAAAACGGCAACCACCTGGCAAAAGATAATTAAAATTGAGAGAGTTCATTTGAAATCTACGATCAACAGTCACTGATAAAACAAGTCAGATGATTGCACTTGGAAATATAAATGCGGAAAATGCAGAAAATATGAAACAGCAGGGGATGATGAAAAAATGTGAAATGAAAAAGATTTGTAGGATGTCAACCGGCGTGCTACTATTCAACAGTGACAAGTTCCACTTCAAACGTCAAAGTGGCGTTTCCAGGGATTTTTCCCTCAAGCCCCCGTCTTCCATAGGCCCATTCAGGCTCAATGACGATTTCGGATTTCTCTCCAAGGCTCATTGTCATCA…	>comp2261355_c0_seq1_Group_Peptidyl-prolyl_cis-trans-isomerase TTTTTTTTTTTTTTTTTTTGTTTTAAAGTTTTTTTAATCATCGCAACAAAGTTTTCAATACACAAAACGGCAACCACCTGGCAAAAGATAATTAAAATTGAGAGAGTTCATTTGAAATCTACGATCAACAGTCACTGATAAAACAAGTCAGATGATTGCACTTGGAAATATAAATGCGGAAAATGCAGAAAATATGAAACAGCAGGGGATGATGAAAAAATGTGAAATGAAAAAGATTTGTAGGATGTCAACCGGCGTGCTACTATTCAACAGTGACAAGTTCCACTTCAAACGTCAAAGTGGCGTTTCCAGGGATTTTTCCCTCAAGCCCCCGTC…
comp2250470_c0_seq1	2e-65	675	sp|P91791|PPIA_HEMPU	Peptidyl-prolyl cis-trans isomerase OS=Hemicentrotus pulcherrimus PE=2 SV=1	4.1e-65	672	sp|P25007|PPIA_DROME	Peptidyl-prolyl cis-trans isomerase OS=Drosophila melanogaster GN=Cyp1 PE=1 SV=2	2.6e-63	655	sp|P54985|PPIA_BLAGE	Peptidyl-prolyl cis-trans isomerase OS=Blattella germanica GN=CYPA PE=2 SV=1			+		+	Group_Peptidyl-prolyl_cis-trans-isomerase	TTCTCCCATTTGGCGCTCTGCTGTCTTGTTGCAAGGAAGAAGCCGGTCGGCACAAGCAATCATTCGTCTCTACGCAGCCCTTTGTTCAACTTCCAAGAAAATGAAGCAAGTTTTCTTCGATATCACCATTGGTGGGCAAGATGCTGGACGTGTCGTCATGCAGTTGCGTGATGACGTTGTGCCCAAGACCGTGGAGAACTTCCGAGCTCTGTGCACTGGAGAGAAGGGCTTTGGCTTCGCTGGCTCCTCCTTCCACAGGATCATCCCAGGCTTCATGTGCCAGGGAGGCGACTTCACTGCTGGCAACGGCACTGGTGGCAAGAGCATCTACGGAAATAAGTTTGAGGACGAGAACTTCACACTGAAGCACACCGGAGCAGGAATCCTGTCCATGGCTAA…	>comp2250470_c0_seq1_Group_Peptidyl-prolyl_cis-trans-isomerase TTCTCCCATTTGGCGCTCTGCTGTCTTGTTGCAAGGAAGAAGCCGGTCGGCACAAGCAATCATTCGTCTCTACGCAGCCCTTTGTTCAACTTCCAAGAAAATGAAGCAAGTTTTCTTCGATATCACCATTGGTGGGCAAGATGCTGGACGTGTCGTCATGCAGTTGCGTGATGACGTTGTGCCCAAGACCGTGGAGAACTTCCGAGCTCTGTGCACTGGAGAGAAGGGCTTTGGCTTCGCTGGCTCCTCCTTCCACAGGATCATCCCAGGCTTCATGTGCCAGGGAGGCGACTTCACTGCTGGCAACGGCACTGGTGGCAAGAGCATCTACGGAAA…
comp2264796_c2_seq1	9.2e-52	546	sp|P99029|PRDX5_MOUSE	Peroxiredoxin-5, mitochondrial OS=Mus musculus GN=Prdx5 PE=1 SV=2	4.6e-50	530	sp|P30044|PRDX5_HUMAN	Peroxiredoxin-5, mitochondrial OS=Homo sapiens GN=PRDX5 PE=1 SV=4	5.8e-50	529	sp|Q9R063|PRDX5_RAT	Peroxiredoxin-5, mitochondrial OS=Rattus norvegicus GN=Prdx5 PE=1 SV=1			+		+	Group_Peroxiredoxin	TTTTTTTTTTTTTTTTTTTCAGTGTTTGAGTGTGTTTATATGGCAAGATATGAAACTACAGAAATGCTCTATAAATGCATTGCAAGGCCAACAGAATATAATATGAATAATTGATTTCTTTAAATCACCAAGTAAAAACTTGCAAGTTGAATGAGTATTTGCTTTACAAAATAAAACCTATTTCAAATATTTTGTTTCCCTTCCCAATAACTTAGATGAATAATTACACATAAAATGCATTCTGCTAAAGATCTGTGACACCCTAGTAACCGAAAAAAGATGGATGCATCGTCTACAATTGTGCCAAAATGCCGTTGCTGAGACTGCACGTCAAGCCAGTTCCATCAGGCTCCAGGTTAACGTTCTTGACCACACCGTTTTCTACGACAAGGGAATACC…	>comp2264796_c2_seq1_Group_Peroxiredoxin TTTTTTTTTTTTTTTTTTTCAGTGTTTGAGTGTGTTTATATGGCAAGATATGAAACTACAGAAATGCTCTATAAATGCATTGCAAGGCCAACAGAATATAATATGAATAATTGATTTCTTTAAATCACCAAGTAAAAACTTGCAAGTTGAATGAGTATTTGCTTTACAAAATAAAACCTATTTCAAATATTTTGTTTCCCTTCCCAATAACTTAGATGAATAATTACACATAAAATGCATTCTGCTAAAGATCTGTGACACCCTAGTAACCGAAAAAAGATGGATGCATCGTCTACAATTGTGCCAAAATGCCGTTGCTGAGACTGCACGTCAAGCCAGTTCCATCAGGCTCCAGGTT…
comp2262362_c0_seq1	1.3e-82	837	sp|Q5ZJF4|PRDX6_CHICK	Peroxiredoxin-6 OS=Gallus gallus GN=PRDX6 PE=2 SV=3	3.4e-77	786	sp|O77834|PRDX6_BOVIN	Peroxiredoxin-6 OS=Bos taurus GN=PRDX6 PE=1 SV=3	5.5e-77	784	sp|O35244|PRDX6_RAT	Peroxiredoxin-6 OS=Rattus norvegicus GN=Prdx6 PE=1 SV=3		+			+	Group_Peroxiredoxin	GTTGCACGACGTTCCAGTCACTGTCAGTGTGGCACTTGGTCTGGAAGCACGTGGCTGTCAAGTTCCTTCACAAAGCTTAAAGAAAATGCCTGGAATAAACTTAGGAGATGCTTTTCCCAACTTGGACTTGGACACCACTGAGGGGAGGATCAAGTTCTACGACTTCCAGGGAGATTCATGGGGCATCTTGTTCTCCCACCCTCGTGATTACACCCCAGTGTGCACAACAGAGTTAGGCCGAGTGTCACAACTGACAGGGGAATTTGCCAAAAGGAACGTCAAACTGATTGCCCTCTCTTGCGACTCCGTTGCTGACCACAAGGGCTGGACTAAGGACATCCTTTGCTATGCTGGTGCCTCTGGTGACAAGCTGCCCTACCCCATCATTGCAGACCCTGA…	>comp2262362_c0_seq1_Group_Peroxiredoxin GTTGCACGACGTTCCAGTCACTGTCAGTGTGGCACTTGGTCTGGAAGCACGTGGCTGTCAAGTTCCTTCACAAAGCTTAAAGAAAATGCCTGGAATAAACTTAGGAGATGCTTTTCCCAACTTGGACTTGGACACCACTGAGGGGAGGATCAAGTTCTACGACTTCCAGGGAGATTCATGGGGCATCTTGTTCTCCCACCCTCGTGATTACACCCCAGTGTGCACAACAGAGTTAGGCCGAGTGTCACAACTGACAGGGGAATTTGCCAAAAGGAACGTCAAACTGATTGCCCTCTCTTGCGACTCCGTTGCTGACCACAAGGGCTGGACTAAGGACATCCTTTGCTATGCTGGTGCC…
comp2268798_c0_seq2	2.9e-135	1334	sp|Q8VEM8|MPCP_MOUSE	Phosphate carrier protein, mitochondrial OS=Mus musculus GN=Slc25a3 PE=1 SV=1	6e-135	1331	sp|Q5R7W2|MPCP_PONAB	Phosphate carrier protein, mitochondrial OS=Pongo abelii GN=SLC25A3 PE=2 SV=1	2.6e-134	1325	sp|P16036|MPCP_RAT	Phosphate carrier protein, mitochondrial OS=Rattus norvegicus GN=Slc25a3 PE=1 SV=1			+		+		GACTTTTTTTTAATTTTTGTTCTGTAGTTTTATACTCTGTATTTTCTTTGTACAAGATGTTTCTTATCAATTCATGCATATACCAACAATAATTTAGCGCAGGCAATGACTGCGATACCTGGCATAACACATCATTTAGGATAAAACCTGAAATGTTAATAAATCAATTGCCTAGTGGTTGTGTACACCATGCAGTACATGGTCTTTTTAAATGTCAATTACATTTCCTCTTCAATACATGACATAGTGTGAAATTCTCTTCAAATGTCACAAGGTGTACATTGGACAATGCATGGAATTAACCATGGAAATTTGCAGGTGAGATTGATAAAACAGATCAGGAATGGATCAATAAGATTCTACTGCTGTTGGGCTGCAAGTTTGGCCTTGAGGGAGGCG…	>comp2268798_c0_seq2 GACTTTTTTTTAATTTTTGTTCTGTAGTTTTATACTCTGTATTTTCTTTGTACAAGATGTTTCTTATCAATTCATGCATATACCAACAATAATTTAGCGCAGGCAATGACTGCGATACCTGGCATAACACATCATTTAGGATAAAACCTGAAATGTTAATAAATCAATTGCCTAGTGGTTGTGTACACCATGCAGTACATGGTCTTTTTAAATGTCAATTACATTTCCTCTTCAATACATGACATAGTGTGAAATTCTCTTCAAATGTCACAAGGTGTACATTGGACAATGCATGGAATTAACCATGGAAATTTGCAGGTGAGATTGATAAAACAGATCAGGAATGGATCAATAAGATTCTACTGCTGTTGGGCTGCA…
comp2276031_c0_seq51	4e-146	851	sp|O95758|PTBP3_HUMAN	Polypyrimidine tract-binding protein 3 OS=Homo sapiens GN=PTBP3 PE=1 SV=2	4.7e-143	835	sp|Q00438|PTBP1_RAT	Polypyrimidine tract-binding protein 1 OS=Rattus norvegicus GN=Ptbp1 PE=1 SV=1	1.2e-142	837	sp|Q29099|PTBP1_PIG	Polypyrimidine tract-binding protein 1 OS=Sus scrofa GN=PTBP1 PE=2 SV=1			+		+		CATACTAGTGGCATATTCATTAATTGCTCAATAAATTTTTTTTTATTATCAAACATTATATACACAAATTCTTTAAAGTTTCAGTGTAGTGGTCCTTCCGAAGTAAATCCAAAAGCCAGGTTCCTCAATGTCTCCAGTGGATTGACTTACTGCGCCCATTCCGTTTCTTTTGATGTCTCGTCTCCTTTAAAATTTCATTTTATAAAATCTAAATATAACCCAGTTTTCTTTACCCCTGCAGCTTCTCGATGAAATTTTATGCGATTAATTGTGACTCCCTAGTTTGAATATCAATTTTCTTGGCTTGCCTTCTATATCGTTCATCGGTTTTAATTCAGGATGGTTTTAATAAGAATTTCTACTAATATTTGAAACTTGTGTATTAGGTAAGAAGAGTTT…	>comp2276031_c0_seq51 CATACTAGTGGCATATTCATTAATTGCTCAATAAATTTTTTTTTATTATCAAACATTATATACACAAATTCTTTAAAGTTTCAGTGTAGTGGTCCTTCCGAAGTAAATCCAAAAGCCAGGTTCCTCAATGTCTCCAGTGGATTGACTTACTGCGCCCATTCCGTTTCTTTTGATGTCTCGTCTCCTTTAAAATTTCATTTTATAAAATCTAAATATAACCCAGTTTTCTTTACCCCTGCAGCTTCTCGATGAAATTTTATGCGATTAATTGTGACTCCCTAGTTTGAATATCAATTTTCTTGGCTTGCCTTCTATATCGTTCATCGGTTTTAATTCAGGATGGTTTTAATAAGAATTTCTACTAATATTTGAAACTT…
comp2271419_c1_seq1	1e-107	1074	sp|Q54P77|4CL1_DICDI	Probable 4-coumarate--CoA ligase 1 OS=Dictyostelium discoideum GN=4cl1 PE=3 SV=1	4.6e-105	1049	sp|Q54P79|4CL3_DICDI	Probable 4-coumarate--CoA ligase 3 OS=Dictyostelium discoideum GN=4cl3 PE=3 SV=2	7.5e-105	1047	sp|Q54P78|4CL2_DICDI	Probable 4-coumarate--CoA ligase 2 OS=Dictyostelium discoideum GN=4cl2 PE=3 SV=1				+	+		ATCAAAATCAGGAAAATTATCATTAAAAAAAATCTCACTACAATGAAGAGGGCTTCAAGATTGGCTCAGACTTTGCTGAGGTCCAAGACAAACCAGATCAGAGCTTCTCAAACTTTTAAAAGGACTTATTCCACACCTCTGGCCAGCAATGTGTCGTCTGATGGAATGGTCAGGTGTGCTTTCCCTGATGTGGAACTCAGAAATGTACCTCTGCCTCATCTCATGCTGGATGCATTCTCTAAACACGGGGACAACGTGGCACTGGTTGACCACATGTCAGGGAGGCAGTACACCTTCAATCAGTTGACGATGGCTGTGACGCGAGTTGCCAGTGCTTTTGCTAAATCAGGAGTCAAACAGGGAGATGCCGTAACACTCTTTTCGCCCAACTGTCCAGAG…	>comp2271419_c1_seq1 ATCAAAATCAGGAAAATTATCATTAAAAAAAATCTCACTACAATGAAGAGGGCTTCAAGATTGGCTCAGACTTTGCTGAGGTCCAAGACAAACCAGATCAGAGCTTCTCAAACTTTTAAAAGGACTTATTCCACACCTCTGGCCAGCAATGTGTCGTCTGATGGAATGGTCAGGTGTGCTTTCCCTGATGTGGAACTCAGAAATGTACCTCTGCCTCATCTCATGCTGGATGCATTCTCTAAACACGGGGACAACGTGGCACTGGTTGACCACATGTCAGGGAGGCAGTACACCTTCAATCAGTTGACGATGGCTGTGACGCGAGTTGCCAGTGCTTTTGCTAAATCAGGAGTCAAACAGGGAGATGCCGTAACACTC…
comp2263250_c0_seq1	3.1e-19	239	sp|Q9FYK2|CML25_ARATH	Probable calcium-binding protein CML25 OS=Arabidopsis thaliana GN=CML25 PE=2 SV=1	4e-19	238	sp|Q2TBN3|CETN2_BOVIN	Centrin-2 OS=Bos taurus GN=CETN2 PE=2 SV=1	4e-19	238	sp|Q8K4K1|CETN4_MOUSE	Centrin-4 OS=Mus musculus GN=Cetn4 PE=1 SV=1	+		+	+	+++	Candidate_Calcium-binding_protein	TTTTTTTTTTTTTTTTAATTTTTCGAACTTTATTTGAATTGCAACTTGCAGTAGAAGTGTAAATGCTTACTTATTTGTGTCTGTATACGGTAACAACAAAACATATTGAAAAACAACATTGCAGTCAGATGAAGTTGACTTTTGATTGCGGATTGTTGGATTACGAATTGCATCCGCCAACTTCATCTAACTGCAAATGTCGAAAATACAAAGTAATAACAATATCAAGAAAGATAACAATAAAATTTACAATAAAAATCTATAATTTAGATTGATTGATAAAATGATGCCAGGAATTCTTCATAATTTACAGTTCCTGAGCCATCTTTGTCGATGAATTCGATGAATTTCTTGACTTGGTCTTTGGAAACCTTTTCGCCGAGTTCTTTGAAGATTTCC…	>comp2263250_c0_seq1_Candidate_Calcium-binding_protein TTTTTTTTTTTTTTTTAATTTTTCGAACTTTATTTGAATTGCAACTTGCAGTAGAAGTGTAAATGCTTACTTATTTGTGTCTGTATACGGTAACAACAAAACATATTGAAAAACAACATTGCAGTCAGATGAAGTTGACTTTTGATTGCGGATTGTTGGATTACGAATTGCATCCGCCAACTTCATCTAACTGCAAATGTCGAAAATACAAAGTAATAACAATATCAAGAAAGATAACAATAAAATTTACAATAAAAATCTATAATTTAGATTGATTGATAAAATGATGCCAGGAATTCTTCATAATTTACAGTTCCTGAGCCATCTTTGTCGATGAATTCGAT…
comp2234809_c0_seq1	6.1e-39	425	sp|P18321|PROF_CLYJA	Profilin OS=Clypeaster japonicus PE=1 SV=2	1.6e-38	421	sp|Q9U0E6|PROF_SUBDO	Profilin OS=Suberites domuncula PE=2 SV=1	3.4e-38	418	sp|P18320|PROF_HELCR	Profilin OS=Heliocidaris crassispina PE=1 SV=2				+	+		TTTTTTTTGACTTTTGGAGACCTGTTATTAAGGAAGCGAACAACTTTCAAGGAAAAAAAAAAGTATATTTGACCATATAATCTACAAAACAAGACACGATTCCATAAATTACACAAAGTCTTTCCAGCAATACTTAACTGTTTCATACATACATGAGGCAAGCAAATTCCGTGGTATTTTAATTGGGATTAATTTAATTCAGAAAGACTGCCGAGGCCAAAACTGACATTGTTTTTTTTTTATAGCATATACCATTAATAATAACAATAATATCCACTGATAAAGAAGTCTGTGACACTGATACTTTATATTACGTAAATTAAGCTGATCTCTAAATCAAATTCGAACCACTGATACCTAGCTCTTTACTGATTAATTGGATACAAAACATCTGACAAT…	>comp2234809_c0_seq1 TTTTTTTTGACTTTTGGAGACCTGTTATTAAGGAAGCGAACAACTTTCAAGGAAAAAAAAAAGTATATTTGACCATATAATCTACAAAACAAGACACGATTCCATAAATTACACAAAGTCTTTCCAGCAATACTTAACTGTTTCATACATACATGAGGCAAGCAAATTCCGTGGTATTTTAATTGGGATTAATTTAATTCAGAAAGACTGCCGAGGCCAAAACTGACATTGTTTTTTTTTTATAGCATATACCATTAATAATAACAATAATATCCACTGATAAAGAAGTCTGTGACACTGATACTTTATATTACGTAAATTAAGCTGATCTCTAAATCAAATTCGAACCACTGATACCTAGCTCTTTACTGATTAATT…
comp2266233_c0_seq1	3.1e-09	153	sp|Q8K0G7|PHGR1_MOUSE	Proline, histidine and glycine-rich protein 1 OS=Mus musculus GN=Phgr1 PE=4 SV=1	1.1e-07	165	sp|B1MD87|IF2_MYCA9	Translation initiation factor IF-2 OS=Mycobacterium abscessus (strain ATCC 19977 / DSM 44196 / CIP 104536 / JCM 13569 / NCTC 13031 / TMC 1543) GN=infB PE=3 SV=1	4.6e-07	133	sp|C9JFL3|PHGR1_HUMAN	Proline, histidine and glycine-rich protein 1 OS=Homo sapiens GN=PHGR1 PE=4 SV=1		+			+		CCTGGATCAGAACGCGGCCCACGCTCTGGACAGGATCAACTCCCCGACGTTGAAATCGAATATGAAACCCGTCCAGTAGCTCACCCCGGCCCCCGCCCACATCCCCGCCCTGGATATCCATATCCCCAACCTGGACACGGTCATCCCCACCCTGGACACGGTCAGCGCCCTGGACATGGTCCGCGCCCTGGACATGGTCATCCTCGCCCTGGACACGGTCCACGCCATGGACATGGCAACAGGCCACAAGGTCACGGTCCAATCAGACGCAGGGAAGACTGCCGAAGAATTGCCCAATTACTTTACAATGGATATGAAACCTCCGAGAAATTGCCCAGAGAAGTACTTGAGCGAAGCCTTGGACTGGGCGCCAACTTCACAAGGACAGACCTGACGAAA…	>comp2266233_c0_seq1 CCTGGATCAGAACGCGGCCCACGCTCTGGACAGGATCAACTCCCCGACGTTGAAATCGAATATGAAACCCGTCCAGTAGCTCACCCCGGCCCCCGCCCACATCCCCGCCCTGGATATCCATATCCCCAACCTGGACACGGTCATCCCCACCCTGGACACGGTCAGCGCCCTGGACATGGTCCGCGCCCTGGACATGGTCATCCTCGCCCTGGACACGGTCCACGCCATGGACATGGCAACAGGCCACAAGGTCACGGTCCAATCAGACGCAGGGAAGACTGCCGAAGAATTGCCCAATTACTTTACAATGGATATGAAACCTCCGAGAAATTGCCCAGAGAAGTACTTGAGCGAAGCCTTGGACTGGGCGCCAACTTC…
comp2266503_c0_seq6	1.1e-124	1234	sp|Q60715|P4HA1_MOUSE	Prolyl 4-hydroxylase subunit alpha-1 OS=Mus musculus GN=P4ha1 PE=1 SV=2	1.9e-124	1232	sp|P54001|P4HA1_RAT	Prolyl 4-hydroxylase subunit alpha-1 OS=Rattus norvegicus GN=P4ha1 PE=2 SV=2	8.1e-124	1226	sp|P13674|P4HA1_HUMAN	Prolyl 4-hydroxylase subunit alpha-1 OS=Homo sapiens GN=P4HA1 PE=1 SV=2		+			+	Group_Prolyl_4-hydroxylase	AGGTTTTGCATGGAAATTTATTTGGAAGAACGTTAAATTGCTTTTACAATTTGCTGCATATATATAAAACAACCTCTCTTCCGAATGGTCTTCTTGAAACGGTGTATATAAAATATTTATCAGACCAAACAACTCTGACAATAATAAGCACATAATTAAGAAGGCAAATGGTGCACAAACTGAATGTAAATATATATATAATATACTATCATATATATATATCAAAGGGAAAAAGAAGCCAGTATAGTTGTGAGTATTATCTTACTCAGATCCAAAACATCACATAATTAAGTTATTCTAACCAACATGAACAATCTGCACTGTGGGTAATTGACTGTATTACCTACATCAATAAAATAACAGTTAATCTAGTAGTGTTGTCTGAACTGTCTGAACGAA…	>comp2266503_c0_seq6_Group_Prolyl_4-hydroxylase AGGTTTTGCATGGAAATTTATTTGGAAGAACGTTAAATTGCTTTTACAATTTGCTGCATATATATAAAACAACCTCTCTTCCGAATGGTCTTCTTGAAACGGTGTATATAAAATATTTATCAGACCAAACAACTCTGACAATAATAAGCACATAATTAAGAAGGCAAATGGTGCACAAACTGAATGTAAATATATATATAATATACTATCATATATATATATCAAAGGGAAAAAGAAGCCAGTATAGTTGTGAGTATTATCTTACTCAGATCCAAAACATCACATAATTAAGTTATTCTAACCAACATGAACAATCTGCACTGTGGGTAATTGACTGTATTACCTACATCA…
comp2266005_c0_seq5	5.9e-121	1199	sp|P54001|P4HA1_RAT	Prolyl 4-hydroxylase subunit alpha-1 OS=Rattus norvegicus GN=P4ha1 PE=2 SV=2	6.7e-120	1189	sp|P13674|P4HA1_HUMAN	Prolyl 4-hydroxylase subunit alpha-1 OS=Homo sapiens GN=P4HA1 PE=1 SV=2	6.7e-120	1189	sp|Q5RAG8|P4HA1_PONAB	Prolyl 4-hydroxylase subunit alpha-1 OS=Pongo abelii GN=P4HA1 PE=2 SV=1		+		+	++	Group_Prolyl_4-hydroxylase	TTTTTTTTTTTTTTTTTTTACAAATGAGTACAAAACATTTATTTAATTGTCAAACGACAAAAAGACATTTTAATGTATAATACCATGTTTGGGGAGACAACAGATACATTGAGAATGTAACTTGTGTAAGCAGTCTATGGTATATTCGCCACAAAACAATAAATAATGAGTATTACGCTTCGTTGTGAAACTAAATTGTTTCTAAAATTATTGAATTGATTGTTTGAGAACGGGGTAAACGCAAAACACTTTGAACACAAAAACGTAGAATGGTAAATGGGTGTAAATAGCATGTAACTTAATGTAAGTTGCAATGTTCATATACAGGAGCGATGAAAAAGTAGAAAAAAATTGCGATTCATAACCAACTGTTCCTCTTTATAATCTCAAAACAAATAC…	>comp2266005_c0_seq5_Group_Prolyl_4-hydroxylase TTTTTTTTTTTTTTTTTTTACAAATGAGTACAAAACATTTATTTAATTGTCAAACGACAAAAAGACATTTTAATGTATAATACCATGTTTGGGGAGACAACAGATACATTGAGAATGTAACTTGTGTAAGCAGTCTATGGTATATTCGCCACAAAACAATAAATAATGAGTATTACGCTTCGTTGTGAAACTAAATTGTTTCTAAAATTATTGAATTGATTGTTTGAGAACGGGGTAAACGCAAAACACTTTGAACACAAAAACGTAGAATGGTAAATGGGTGTAAATAGCATGTAACTTAATGTAAGTTGCAATGTTCATATACAGGAGCGATGAAAAAGTAGAAAAAAA…
comp2260394_c0_seq1	2.1e-09	181	sp|P76072|STFR_ECOLI	Prophage side tail fiber protein homolog StfR OS=Escherichia coli (strain K12) GN=stfR PE=3 SV=2	9.4e-09	176	sp|Q96Q06|PLIN4_HUMAN	Perilipin-4 OS=Homo sapiens GN=PLIN4 PE=1 SV=2	9.7e-08	162	sp|Q5SSG8|MUC21_HUMAN	Mucin-21 OS=Homo sapiens GN=MUC21 PE=1 SV=2				+	+		AAAACCAACCTTGTCTGAATTTTTATAGAGTGTTGGTTGAATGAAAGCAGGCAATGGCAGGAGCAGCAACTTAAACAGGCTTGATGGCGAGTGGTAATCCTCTTACGCTTTGGAAATTAGCTTAATTTTGAACTGTCCGTTGTGGTCTCCAGTAACCTCCTTCGCGGGTTTCAGATCTCCACCATTTGTAAATCCAAGATGGCTGCCATCATTGGCACGCAGTGACACGTGGGTGCCGTGTAATTCTACTGTTAGTTTAGTGTCCTCCTCTGGTGACTCGGTTTCCACCAAAGTGGCTTCTCCGTTGGTGATGTTGATGTATTTGTTTCCGGTGTTGAGCCTAATAACATCCCCACCCGCTGAGGTAACGGTCCAGGTGGCTTGAGCATTTGACTCTCC…	>comp2260394_c0_seq1 AAAACCAACCTTGTCTGAATTTTTATAGAGTGTTGGTTGAATGAAAGCAGGCAATGGCAGGAGCAGCAACTTAAACAGGCTTGATGGCGAGTGGTAATCCTCTTACGCTTTGGAAATTAGCTTAATTTTGAACTGTCCGTTGTGGTCTCCAGTAACCTCCTTCGCGGGTTTCAGATCTCCACCATTTGTAAATCCAAGATGGCTGCCATCATTGGCACGCAGTGACACGTGGGTGCCGTGTAATTCTACTGTTAGTTTAGTGTCCTCCTCTGGTGACTCGGTTTCCACCAAAGTGGCTTCTCCGTTGGTGATGTTGATGTATTTGTTTCCGGTGTTGAGCCTAATAACATCCCCACCCGCTGAGGTAACGGTCCAGGT…
comp2269297_c0_seq2	7.8e-68	510	sp|P26779|SAP_BOVIN	Prosaposin OS=Bos taurus GN=PSAP PE=1 SV=3	1.1e-48	524	sp|P07602|SAP_HUMAN	Prosaposin OS=Homo sapiens GN=PSAP PE=1 SV=2	2.6e-45	493	sp|O13035|SAP_CHICK	Prosaposin OS=Gallus gallus GN=PSAP PE=1 SV=1		+			+		ATCTTATCTTTTTTTTTTTAAAGAAAATGTGTTTTATTTTCTGTCAAATGGAATTCACCCCTAAGGCATACAGTGTAATTTTAAGATCCATTTGAAGCAGTATAATGTGAATTATATATAGTAGTTGCAAATAATGTTCACTCAGCTGTCTTTTAAATTTCAGTCTATATTTATAAATCTTATTCTTATAACCCCCCTGGACACATATACAAAGATACAAATTTACTACATCAATTGGGATGAAAAACCTAGATTATATGGGACACAGTTAAATTTGCACAAGTTGACATTTTTCAAAGTTCACAAAAGAAAAATAATCTGTAATTGGTAGGGAATCTGACTTGTGCAAAGTTAACTGTTATCAAAGAATAGGGACCAAAACAAAAAATTTAAAGAAAA…	>comp2269297_c0_seq2 ATCTTATCTTTTTTTTTTTAAAGAAAATGTGTTTTATTTTCTGTCAAATGGAATTCACCCCTAAGGCATACAGTGTAATTTTAAGATCCATTTGAAGCAGTATAATGTGAATTATATATAGTAGTTGCAAATAATGTTCACTCAGCTGTCTTTTAAATTTCAGTCTATATTTATAAATCTTATTCTTATAACCCCCCTGGACACATATACAAAGATACAAATTTACTACATCAATTGGGATGAAAAACCTAGATTATATGGGACACAGTTAAATTTGCACAAGTTGACATTTTTCAAAGTTCACAAAAGAAAAATAATCTGTAATTGGTAGGGAATCTGACTTGTGCAAAGTTAACTGTTATCAAAGAATAGGGACCA…
comp2232113_c0_seq1	1.1e-110	1102	sp|Q3ZCK9|PSA4_BOVIN	Proteasome subunit alpha type-4 OS=Bos taurus GN=PSMA4 PE=1 SV=1	1.1e-110	1102	sp|P25789|PSA4_HUMAN	Proteasome subunit alpha type-4 OS=Homo sapiens GN=PSMA4 PE=1 SV=1	1.4e-110	1101	sp|Q9R1P0|PSA4_MOUSE	Proteasome subunit alpha type-4 OS=Mus musculus GN=Psma4 PE=1 SV=1			+		+		TACACATATTGACATATCCGTAATTTATTATAATATTGTCATCAAGCAGATTCAAGAACATACAAAATATTACATACAAATAAACACAATTTTTCAGTTCTTCATAACATCTCTAAATGAGGTGCCAAATCTAAGAAGATTTTTCAGCCTTCTTTTTCTCGGCCTCTAGCTTGGCTTCGGCTTCATTGTGTTTCTTGATGAGCACTTCCAATTCACTGGCTGGCAACACACGGATCATTGTCTTGCCCTCAACTCTTGTCAGTGTGGAGATCTCAACTTTGTCTGGGGTTAACTTGTTAGTGTCTAGCGTTTTGCTGAGGACTTTGATGGAGAGTTCTAGAGCTGCTTGAAGGTTGATTTCTCCTTCTTTGTAGTCTTGTTTCAACATGCTCACAGCGG…	>comp2232113_c0_seq1 TACACATATTGACATATCCGTAATTTATTATAATATTGTCATCAAGCAGATTCAAGAACATACAAAATATTACATACAAATAAACACAATTTTTCAGTTCTTCATAACATCTCTAAATGAGGTGCCAAATCTAAGAAGATTTTTCAGCCTTCTTTTTCTCGGCCTCTAGCTTGGCTTCGGCTTCATTGTGTTTCTTGATGAGCACTTCCAATTCACTGGCTGGCAACACACGGATCATTGTCTTGCCCTCAACTCTTGTCAGTGTGGAGATCTCAACTTTGTCTGGGGTTAACTTGTTAGTGTCTAGCGTTTTGCTGAGGACTTTGATGGAGAGTTCTAGAGCTGCTTGAAGGTTGATTTCTCCTTCTTTGTAGTCTT…
comp2274238_c3_seq9	3.6e-71	728	sp|B4IX08|SHEP_DROGR	Protein alan shepard OS=Drosophila grimshawi GN=shep PE=3 SV=1	5.8e-71	728	sp|B4LFQ9|SHEP_DROVI	Protein alan shepard OS=Drosophila virilis GN=shep PE=3 SV=2	2.6e-70	722	sp|B3NGA1|SHEP_DROER	Protein alan shepard OS=Drosophila erecta GN=shep PE=3 SV=1	+				+		TTTTTTTTTTTTTTTTTATGTTTCAACAACTTTATCCAATTTATTTTTCCCAGTGCCACAAGTTGGCATGTTATTCTCATCTTATTTTCTTTAATTACTAGTTGAACAGATTGTCTCTCAGGCCTGTTTTGTGGGTGCATAGTGCCTTGTACATCCCATTCAAACATTTCTTACAAATGTCATAGTATCATCATCATCGAAGCAATTGACTTGAGAGGATCGCAAACCTGCAATTGCTAAAACCCTTATTCCAACAAATAACAACTTAAGTGAAGGGAGAGAACTGACCGTTTGCAGTCTCGTTAAAAATTACCTAGCGAGGTCAAAGCTGTACACGTTTCACTTCTCTCCCCTACACCCTGGGATTAAAAACTGTCCCCGTGACAGATATACCGCAAT…	>comp2274238_c3_seq9 TTTTTTTTTTTTTTTTTATGTTTCAACAACTTTATCCAATTTATTTTTCCCAGTGCCACAAGTTGGCATGTTATTCTCATCTTATTTTCTTTAATTACTAGTTGAACAGATTGTCTCTCAGGCCTGTTTTGTGGGTGCATAGTGCCTTGTACATCCCATTCAAACATTTCTTACAAATGTCATAGTATCATCATCATCGAAGCAATTGACTTGAGAGGATCGCAAACCTGCAATTGCTAAAACCCTTATTCCAACAAATAACAACTTAAGTGAAGGGAGAGAACTGACCGTTTGCAGTCTCGTTAAAAATTACCTAGCGAGGTCAAAGCTGTACACGTTTCACTTCTCTCCCCTACACCCTGGGATTAAAAACTGTCC…
comp2266882_c0_seq1	6.2e-149	1463	sp|Q922R8|PDIA6_MOUSE	Protein disulfide-isomerase A6 OS=Mus musculus GN=Pdia6 PE=1 SV=3	7.9e-149	1462	sp|Q63081|PDIA6_RAT	Protein disulfide-isomerase A6 OS=Rattus norvegicus GN=Pdia6 PE=1 SV=2	3.1e-147	1447	sp|Q15084|PDIA6_HUMAN	Protein disulfide-isomerase A6 OS=Homo sapiens GN=PDIA6 PE=1 SV=1		+			+		TCTACCCGCTGAGCTAACCTAAATGACAAAGAAATCATGCAAATTTCCATACCAAGTAATTGAAGTAATTGTGTTCTCTATTTTTAGGACATGTGAGGACCCTGGATGATGATTAGACATTCACTAGACCCTGGATACAATATATTAAATTGATAAATTGAAATGAACGACCTTTTTCTCAATTCACAGACATTCTATGTACAAATCCTTGTATCCAATGCATGAAGATGAAAATGTTAAGTTACATGCCCTCGTCGACATCTTACTTTGATATTAATTAAATCGGTATCAGAAAATATAAGATGGCAAGTAACATCACTTAACTGATACCAACAACTGATATCGATCTATTAAATTATCTCAACATTTCTGACACCGCTTTAAATTGTTGACTAACTT…	>comp2266882_c0_seq1 TCTACCCGCTGAGCTAACCTAAATGACAAAGAAATCATGCAAATTTCCATACCAAGTAATTGAAGTAATTGTGTTCTCTATTTTTAGGACATGTGAGGACCCTGGATGATGATTAGACATTCACTAGACCCTGGATACAATATATTAAATTGATAAATTGAAATGAACGACCTTTTTCTCAATTCACAGACATTCTATGTACAAATCCTTGTATCCAATGCATGAAGATGAAAATGTTAAGTTACATGCCCTCGTCGACATCTTACTTTGATATTAATTAAATCGGTATCAGAAAATATAAGATGGCAAGTAACATCACTTAACTGATACCAACAACTGATATCGATCTATTAAATTATCTCAACATTTCTGACACCG…
comp2260649_c0_seq2	1.2e-129	1281	sp|P91891|MO25_DROME	Protein Mo25 OS=Drosophila melanogaster GN=Mo25 PE=2 SV=2	2.3e-119	1184	sp|Q29RI6|CAB39_BOVIN	Calcium-binding protein 39 OS=Bos taurus GN=CAB39 PE=2 SV=1	2.3e-119	1184	sp|Q9Y376|CAB39_HUMAN	Calcium-binding protein 39 OS=Homo sapiens GN=CAB39 PE=1 SV=1		+			+		TTCCAGCCGAACCGACCCGGAGCCCGACCCACAGACGTCACACTTGAGTTCAAAGTTTTGGGAGCTACCTCTGACTGATTCAGAACCACAAGTATTGAGTGACTGGGCCGGGCGGTCCACACTTCCCTGGTGAGACAAGATGCCGTTGTTTGGGAGCAGGCACAAGAACCCACAGGAGCTGGTCCGCAGTCTGAGGGACGGTCTGCTCACCCTGCAGGAGAGCAAAGACGACAAGAAGTTCACTAAGGCACTGGAGGATGTGTCGAAATGCCTGGCCACCATGAAGAACATGTTGTACGGGACGGCCGACCAGGAGCCCCAGACGGAGGTGACAGCTCAGCTGGCCCAGGAGATGTACAACAACAACATGCTGCACCTGCTCATCCAGAACCTGGCCAA…	>comp2260649_c0_seq2 TTCCAGCCGAACCGACCCGGAGCCCGACCCACAGACGTCACACTTGAGTTCAAAGTTTTGGGAGCTACCTCTGACTGATTCAGAACCACAAGTATTGAGTGACTGGGCCGGGCGGTCCACACTTCCCTGGTGAGACAAGATGCCGTTGTTTGGGAGCAGGCACAAGAACCCACAGGAGCTGGTCCGCAGTCTGAGGGACGGTCTGCTCACCCTGCAGGAGAGCAAAGACGACAAGAAGTTCACTAAGGCACTGGAGGATGTGTCGAAATGCCTGGCCACCATGAAGAACATGTTGTACGGGACGGCCGACCAGGAGCCCCAGACGGAGGTGACAGCTCAGCTGGCCCAGGAGATGTACAACAACAACATGCTGCACCT…
comp2248291_c0_seq1	3.4e-132	1305	sp|P55735|SEC13_HUMAN	Protein SEC13 homolog OS=Homo sapiens GN=SEC13 PE=1 SV=3	9.1e-132	1301	sp|Q9D1M0|SEC13_MOUSE	Protein SEC13 homolog OS=Mus musculus GN=Sec13 PE=1 SV=3	9.1e-132	1301	sp|Q5XFW8|SEC13_RAT	Protein SEC13 homolog OS=Rattus norvegicus GN=Sec13 PE=1 SV=1				+	+		TTTTTTTTTTTTTTATTTTTCATTTTTTTTTTTTAAATTTATATATTTATTACATATGTACAAATTTAAGACTGTCATAATTCTTTCACAAAGAAACTCCTGAAGACTGTTTCCTCTCACTCAATCGGCTTGTGAACATCATTTAACATAAATACGACCTGAGGAACCTTGCACTGAATCAATTATTCCTCAGTGCCATCTGGTGTTATTTGCAACACCAAAGTGTCAACATTTCATTCCGCACAAAAAAGTTCTTCCTCTCCGCACAGGTGCTCATTAATAAATACACTTTTCATAACTTTTTTAAAAACATGAGCACCCGTAAGCAACATACAAATAATTAAATGTCAAAAATAATTTGTCCTAAAAAGCAGTTATGTCTATTTTTGTCCTTTGTTG…	>comp2248291_c0_seq1 TTTTTTTTTTTTTTATTTTTCATTTTTTTTTTTTAAATTTATATATTTATTACATATGTACAAATTTAAGACTGTCATAATTCTTTCACAAAGAAACTCCTGAAGACTGTTTCCTCTCACTCAATCGGCTTGTGAACATCATTTAACATAAATACGACCTGAGGAACCTTGCACTGAATCAATTATTCCTCAGTGCCATCTGGTGTTATTTGCAACACCAAAGTGTCAACATTTCATTCCGCACAAAAAAGTTCTTCCTCTCCGCACAGGTGCTCATTAATAAATACACTTTTCATAACTTTTTTAAAAACATGAGCACCCGTAAGCAACATACAAATAATTAAATGTCAAAAATAATTTGTCCTAAAAAGCAGTTAT…
comp2273142_c0_seq1	8.8e-80	814	sp|P53997|SET_DROME	Protein SET OS=Drosophila melanogaster GN=Set PE=1 SV=2	1.9e-79	811	sp|Q63945|SET_RAT	Protein SET OS=Rattus norvegicus GN=Set PE=2 SV=2	3.2e-79	809	sp|Q01105|SET_HUMAN	Protein SET OS=Homo sapiens GN=SET PE=1 SV=3			+	+	++	Group_SET_protein	CCGATCTTATGCAGATAAATGTTGATATTTATAAATAATACCATGGTAGACATTCCAAAAACATGACATTACATCTAGTAATTCTAATAAACTCTTAACTAATCTGAAATTATCAGTAACCGCTGGAAATTTCAATTAAATCTAAAGACTTGCATTCTAAAGATGCAACAGATATCACAAACAAGCTTAAACAATCCAATATTTTGTATCAACATAGATCTTTCAATAACTCCTTTGCTGCTTTGCTAACACAGGCATCATGCTGAGAATCGGAGAGGCTTTTAAAAAAATCTGTCTTCTGCTTGGCTTCATGGATAATACTTGTATTACTTCTTTCAAAGACAAGTGACTGAACAAGTCGAATGGCATGGAGTCTTGTTTCTGCAGAAATACTTGTCT…	>comp2273142_c0_seq1_Group_SET_protein CCGATCTTATGCAGATAAATGTTGATATTTATAAATAATACCATGGTAGACATTCCAAAAACATGACATTACATCTAGTAATTCTAATAAACTCTTAACTAATCTGAAATTATCAGTAACCGCTGGAAATTTCAATTAAATCTAAAGACTTGCATTCTAAAGATGCAACAGATATCACAAACAAGCTTAAACAATCCAATATTTTGTATCAACATAGATCTTTCAATAACTCCTTTGCTGCTTTGCTAACACAGGCATCATGCTGAGAATCGGAGAGGCTTTTAAAAAAATCTGTCTTCTGCTTGGCTTCATGGATAATACTTGTATTACTTCTTTCAAAGACAAGTGACTGAACAAGTC…
comp2274474_c0_seq5	1.9e-99	996	sp|Q01105|SET_HUMAN	Protein SET OS=Homo sapiens GN=SET PE=1 SV=3	3.1e-99	994	sp|Q9EQU5|SET_MOUSE	Protein SET OS=Mus musculus GN=Set PE=1 SV=1	3.1e-99	994	sp|Q63945|SET_RAT	Protein SET OS=Rattus norvegicus GN=Set PE=2 SV=2	+		+	+	+++	Group_SET_protein	ATCAGCTTTTTCATATATATAATATTCATTTATTTATGAATGCGGCATAGCCAGTACAAAGTCGCCTTTACTAAAATTCAGCATATGTGTCCCTAAACGAATGGAATATTCGATCGGATGATTAAATACATTACAATTCACATCAACCAGAATTTACTTAATTACAATTTGTACAGTCATTAGAGTTCACAATAATGTTCGCCTGGACATATACTATGGTACACAATATGGTCGGTTTTAAAATGCTTTGCGATATTTCTGAATTGGCATTAAAGTTTAAGATATTGGACCTTCAGAAAGAACCTTCATGATATTTCATATTGAATTTTCATAATGCATTTTCACAATGAATTTTCAATGAAATTTCACAATGAAATTTCAGAAAGCCCTTCGGGAAAG…	>comp2274474_c0_seq5_Group_SET_protein ATCAGCTTTTTCATATATATAATATTCATTTATTTATGAATGCGGCATAGCCAGTACAAAGTCGCCTTTACTAAAATTCAGCATATGTGTCCCTAAACGAATGGAATATTCGATCGGATGATTAAATACATTACAATTCACATCAACCAGAATTTACTTAATTACAATTTGTACAGTCATTAGAGTTCACAATAATGTTCGCCTGGACATATACTATGGTACACAATATGGTCGGTTTTAAAATGCTTTGCGATATTTCTGAATTGGCATTAAAGTTTAAGATATTGGACCTTCAGAAAGAACCTTCATGATATTTCATATTGAATTTTCATAATGCATTTTCACAATGAATTTTCAATG…
comp2279748_c0_seq1	2.2e-35	392	sp|Q9VZS3|SUI1_DROME	Protein translation factor SUI1 homolog OS=Drosophila melanogaster GN=CG17737 PE=1 SV=1	6.9e-35	388	sp|O60739|EIF1B_HUMAN	Eukaryotic translation initiation factor 1b OS=Homo sapiens GN=EIF1B PE=1 SV=2	6.9e-35	388	sp|Q4R4X9|EIF1B_MACFA	Eukaryotic translation initiation factor 1b OS=Macaca fascicularis GN=EIF1B PE=3 SV=1	+				+		TGTCACATTCACTTCCGTGTTGCTGTTCGAGAAGTTGTAAATTTCTCAACGCCAAATTAAAATCCAAGTCATCTAACGTCGTCTAAGTGACAAATCACTACATTTTCTTCTCAAGGTTTACGCCTGCCTTCTGTATGACCGACAACACGATCCAGAACTTCCAGTCACGCGATCCTTTCGCGGAAGATGACCCAGCGACTGGTGGAAAAAAGAAGGCTGACAACTTCATCCACATAAGAATCCAACAGCGGAACGGTAGGAAGACTCTGACTACTGTCCAGGGAATTTCCGAAGAGTACGACCTCAAGAAAATTGTCAAGGCTTGTAAGAAGGAATTTGCCTGCAACGGTACTGTTGTGGAGCACCCCGAGTACGGAGAGGTCATCCAGTTGCAGGGTG…	>comp2279748_c0_seq1 TGTCACATTCACTTCCGTGTTGCTGTTCGAGAAGTTGTAAATTTCTCAACGCCAAATTAAAATCCAAGTCATCTAACGTCGTCTAAGTGACAAATCACTACATTTTCTTCTCAAGGTTTACGCCTGCCTTCTGTATGACCGACAACACGATCCAGAACTTCCAGTCACGCGATCCTTTCGCGGAAGATGACCCAGCGACTGGTGGAAAAAAGAAGGCTGACAACTTCATCCACATAAGAATCCAACAGCGGAACGGTAGGAAGACTCTGACTACTGTCCAGGGAATTTCCGAAGAGTACGACCTCAAGAAAATTGTCAAGGCTTGTAAGAAGGAATTTGCCTGCAACGGTACTGTTGTGGAGCACCCCGAGTACGGAG…
comp2278630_c0_seq8	1.3e-150	1531	sp|Q2PZL6|FAT4_MOUSE	Protocadherin Fat 4 OS=Mus musculus GN=Fat4 PE=1 SV=2	3.1e-146	1490	sp|Q6V0I7|FAT4_HUMAN	Protocadherin Fat 4 OS=Homo sapiens GN=FAT4 PE=1 SV=2	2e-219	1127	sp|Q8TDW7|FAT3_HUMAN	Protocadherin Fat 3 OS=Homo sapiens GN=FAT3 PE=2 SV=2			+		+		ATGGTGATGCCTCCTGTGTCTTGGTTGATTGCAAAGAAGGACGGGGCAGGGTAGTCGCCAGTTATGAAGAATATCAGTTTTTCAAAGTATCCAGCGTTCATCTTATCGGGGTCATGAGCCTTGACTTGGAAGACGGGTTCTCCAACGCGAGTTGTCTCTGCGATTCTCTGCACGTTGTAAGGAGTGTCGTCAAACCTTGGAGCTCTGGTGCTTCTTCTGACAGTCACGTAGACCGTCATACTCGCTTTCCTCTCCGGGATACCTTGGTCAGAGGCCTCGACTTCAAGAGTGTACTGAGTCTTGGTTCCAGGGTAGAGCATCTTCTTAATGGTGACCTTGCCAGTGTCTGGGTCCACGTGGAAGAACTGCAAGGCGTCCTCATCCCCAATGCCTCGGTAG…	>comp2278630_c0_seq8 ATGGTGATGCCTCCTGTGTCTTGGTTGATTGCAAAGAAGGACGGGGCAGGGTAGTCGCCAGTTATGAAGAATATCAGTTTTTCAAAGTATCCAGCGTTCATCTTATCGGGGTCATGAGCCTTGACTTGGAAGACGGGTTCTCCAACGCGAGTTGTCTCTGCGATTCTCTGCACGTTGTAAGGAGTGTCGTCAAACCTTGGAGCTCTGGTGCTTCTTCTGACAGTCACGTAGACCGTCATACTCGCTTTCCTCTCCGGGATACCTTGGTCAGAGGCCTCGACTTCAAGAGTGTACTGAGTCTTGGTTCCAGGGTAGAGCATCTTCTTAATGGTGACCTTGCCAGTGTCTGGGTCCACGTGGAAGAACTGCAAGGCGTCC…
comp2276577_c0_seq1	4.2e-299	2875	sp|Q11011|PSA_MOUSE	Puromycin-sensitive aminopeptidase OS=Mus musculus GN=Npepps PE=1 SV=2	6.4e-298	2866	sp|P55786|PSA_HUMAN	Puromycin-sensitive aminopeptidase OS=Homo sapiens GN=NPEPPS PE=1 SV=2	6.5e-192	1876	sp|Q8VZH2|APM1_ARATH	Aminopeptidase M1 OS=Arabidopsis thaliana GN=APM1 PE=1 SV=1		+			+		TTTTTTTTTTTTCATTGAAAGAATAATTAAATTTATTTTGTAGTTGATCAGTAAAATTCTTCATTATATCTTTCAATAGATATTCATTTTAACAATAGCACTCAAAAAGTTCAATCAATCATACATGTAAATTCAGAACATCGGTGTCGCTGTCTGGCATGTGTAATATGTGTATTTAGGTATTTTCACAATCTAATAATTCATAATTATAATTATTTATTATATATACAATAGGCCAAAATATTTGTAGCAAATCAGTCAGTATCATTTAAATCGAGAGACACAAAATGATGCAGGCTCAGTACATTGAAATATTGTTGAGACAGCTACAAGAATAAATCCAAAGCATTGTTATGCGAAGTACAATCGAATGGAAATAAATATAATTTTTTTAGATTA…	>comp2276577_c0_seq1 TTTTTTTTTTTTCATTGAAAGAATAATTAAATTTATTTTGTAGTTGATCAGTAAAATTCTTCATTATATCTTTCAATAGATATTCATTTTAACAATAGCACTCAAAAAGTTCAATCAATCATACATGTAAATTCAGAACATCGGTGTCGCTGTCTGGCATGTGTAATATGTGTATTTAGGTATTTTCACAATCTAATAATTCATAATTATAATTATTTATTATATATACAATAGGCCAAAATATTTGTAGCAAATCAGTCAGTATCATTTAAATCGAGAGACACAAAATGATGCAGGCTCAGTACATTGAAATATTGTTGAGACAGCTACAAGAATAAATCCAAAGCATTGTTATGCGAAGTACAATCGAATGGAAAT…
comp2278012_c0_seq11	1.1e-44	519	sp|Q54G05|LRRX1_DICDI	Putative leucine-rich repeat-containing protein DDB_G0290503 OS=Dictyostelium discoideum GN=DDB_G0290503 PE=4 SV=1	7.4e-44	515	sp|G4SLH0|TTN1_CAEEL	Titin homolog OS=Caenorhabditis elegans GN=ttn-1 PE=1 SV=2	1.1e-41	510	sp|P08799|MYS2_DICDI	Myosin-2 heavy chain OS=Dictyostelium discoideum GN=mhcA PE=1 SV=3		+			+		TTCATTCGACTTAGCCTCAATTTCATTCGACTTAGCCTCTACTTCCTTTGACTTAGCCTCTAATTCTTGGGACTTTACCTCCTGAGTTTTACTGGTTTCATCTCCTTTCCTTCCTAAATCTTGTTTGGCTTTTTCTAAATCTTGCTGCTTTGAATCGAGCAAGTCTTTCATTTGCATAAGTTCTTCTTTTACCCTCTCTACATCTTCCGCTTCTGATTTGGAACTTTGCGTAAGTTTAGCTTTTTCGGCATTTACCTCCGATTCTTTATTCTTCATTTGCTTCAATCGTTCTTCCAACTGTTGTTCCTTTTCTATCATCTCCTTCTTCTTCTCTGCATACTCCGCTTCTAATGAGAACCTTGTGTTGTTAAGTTCTGCTTCTTTTGAGGCAAGTTCCTT…	>comp2278012_c0_seq11 TTCATTCGACTTAGCCTCAATTTCATTCGACTTAGCCTCTACTTCCTTTGACTTAGCCTCTAATTCTTGGGACTTTACCTCCTGAGTTTTACTGGTTTCATCTCCTTTCCTTCCTAAATCTTGTTTGGCTTTTTCTAAATCTTGCTGCTTTGAATCGAGCAAGTCTTTCATTTGCATAAGTTCTTCTTTTACCCTCTCTACATCTTCCGCTTCTGATTTGGAACTTTGCGTAAGTTTAGCTTTTTCGGCATTTACCTCCGATTCTTTATTCTTCATTTGCTTCAATCGTTCTTCCAACTGTTGTTCCTTTTCTATCATCTCCTTCTTCTTCTCTGCATACTCCGCTTCTAATGAGAACCTTGTGTTGTTAAGTTCTG…
comp2276277_c0_seq18	8.6e-41	339	sp|A8MUH7|PDZ1P_HUMAN	Putative PDZ domain-containing protein PDZK1P1 OS=Homo sapiens GN=PDZK1P1 PE=5 SV=2	1.1e-39	423	sp|Q28619|NHRF1_RABIT	Na(+)/H(+) exchange regulatory cofactor NHE-RF1 OS=Oryctolagus cuniculus GN=SLC9A3R1 PE=1 SV=3	1.2e-39	345	sp|Q865P3|NHRF3_RABIT	Na(+)/H(+) exchange regulatory cofactor NHE-RF3 OS=Oryctolagus cuniculus GN=PDZK1 PE=1 SV=1			+		+		TTTTGGGATTCAGAGAGCATCGTTCAGCTATTTTCGTATTATATTGGGATTATACAATTTGGGCATCTTTGCTATTGCATAAATTGCATGCAGATTCAGGATTATCGGCCTTTCTATATTTACCATTATGCTGTGCGTTCCTAAATTGTTGAAGTTCGTTTTTGGGTCAAAGAAGCGCGATTCTAGGAAACCCTCCGATGCGTATGATCATGCCGTGAAGTCTGCGGAGGTGATTGAAAGAGCAGAGATTGCACCGGTCGCCGCCCTTGCAGCAGCATCAATAGAAAGTGACGTTCCCCAACCAAGATACTGTCACTTGAGAAAGTGGGCAGACTTCGATGGCTATGGATTCAACCTTCACGCGGAGAAAGGCCAGACAGGACATTTCATTGGCACAGT…	>comp2276277_c0_seq18 TTTTGGGATTCAGAGAGCATCGTTCAGCTATTTTCGTATTATATTGGGATTATACAATTTGGGCATCTTTGCTATTGCATAAATTGCATGCAGATTCAGGATTATCGGCCTTTCTATATTTACCATTATGCTGTGCGTTCCTAAATTGTTGAAGTTCGTTTTTGGGTCAAAGAAGCGCGATTCTAGGAAACCCTCCGATGCGTATGATCATGCCGTGAAGTCTGCGGAGGTGATTGAAAGAGCAGAGATTGCACCGGTCGCCGCCCTTGCAGCAGCATCAATAGAAAGTGACGTTCCCCAACCAAGATACTGTCACTTGAGAAAGTGGGCAGACTTCGATGGCTATGGATTCAACCTTCACGCGGAGAAAGGCCAGA…
comp2270119_c0_seq15	0.75	103	sp|Q3L8P3|SCA2_RICSI	Putative surface cell antigen sca2 OS=Rickettsia sibirica GN=sca2 PE=3 SV=1	0.98	69	sp|Q2KYQ6|FETP_BORA1	Probable Fe(2+)-trafficking protein OS=Bordetella avium (strain 197N) GN=BAV2243 PE=3 SV=1						+			+		GCTTTGGATTCTGTTCCAGACAGATTATGCCAAACTTTGCCGCAGATGCAGTGTATTTACATTAGAATTTTGTTATGAGAACTACATCTGAGTTTACTCATACTAACAATTTCTGAGCTATGGCTATCATTCTCATATATTTCATGGTTGGTTTGATTGCTGCTGACGTTGAAGCCAGCAGGGACTACATCGTCTATGGTACGCCTGGTGGCAGGCAAGGAAGTGCTGGATTGTATGGAGGTTATTATGAGTTTGGTAAGAAACTTGACATGGAATTAACTCACATCAACCAAGCTCATTACAAAGGAGGCTCCATGCATGGCATTGGCGTTAACAGTCTCTCCTACGATCCTGTATCGAAAGATCTTCTGCTGCACGGATCAGGCAGTCTCGATCATT…	>comp2270119_c0_seq15 GCTTTGGATTCTGTTCCAGACAGATTATGCCAAACTTTGCCGCAGATGCAGTGTATTTACATTAGAATTTTGTTATGAGAACTACATCTGAGTTTACTCATACTAACAATTTCTGAGCTATGGCTATCATTCTCATATATTTCATGGTTGGTTTGATTGCTGCTGACGTTGAAGCCAGCAGGGACTACATCGTCTATGGTACGCCTGGTGGCAGGCAAGGAAGTGCTGGATTGTATGGAGGTTATTATGAGTTTGGTAAGAAACTTGACATGGAATTAACTCACATCAACCAAGCTCATTACAAAGGAGGCTCCATGCATGGCATTGGCGTTAACAGTCTCTCCTACGATCCTGTATCGAAAGATCTTCTGCTGCAC…
comp2274541_c0_seq1	5e-20	282	sp|Q19673|TYR3_CAEEL	Putative tyrosinase-like protein tyr-3 OS=Caenorhabditis elegans GN=tyr-3 PE=3 SV=5	6.4e-18	239	sp|P86179|CSL3_ONCKE	L-rhamnose-binding lectin CSL3 OS=Oncorhynchus keta PE=1 SV=1	1.8e-15	216	sp|C0HK23|SML_SCONI	L-rhamnose-binding lectin SML OS=Scomberomorus niphonius PE=1 SV=1		+			+		GTAGGGGCTCACTGCACACTGAGGGACAGGTCCAACATGGCAGCAATGAGGGCAGTTGTTTTGGTGGCTGCTTTTGCAGTCATTAGAGGTCAAATGATGGGAATGGACAGCATGGACATGCCTATGCCTAATGAGAATGGTGTTTACAACATCATGGAGTGCGAAGGCAAAGACATGATGCTCAAATGTCCCGACGCAACTGAAATCAGAATTCTCGATGGGTTCTTCGGAAGAGACAATGACAGAGAATGTCAGGTCGTTGGCCGAACCCACGAGAACACCGGCTGCGTCGTCGAAAAAGATAGGGTCTTGGAGAAGCTGAGAATGGGCTGTGAAGGAAAAATGATGTGTCGCGTTCCCGCAACTATCGAGACCTTCACTTCACCTTGCTTGACTACC…	>comp2274541_c0_seq1 GTAGGGGCTCACTGCACACTGAGGGACAGGTCCAACATGGCAGCAATGAGGGCAGTTGTTTTGGTGGCTGCTTTTGCAGTCATTAGAGGTCAAATGATGGGAATGGACAGCATGGACATGCCTATGCCTAATGAGAATGGTGTTTACAACATCATGGAGTGCGAAGGCAAAGACATGATGCTCAAATGTCCCGACGCAACTGAAATCAGAATTCTCGATGGGTTCTTCGGAAGAGACAATGACAGAGAATGTCAGGTCGTTGGCCGAACCCACGAGAACACCGGCTGCGTCGTCGAAAAAGATAGGGTCTTGGAGAAGCTGAGAATGGGCTGTGAAGGAAAAATGATGTGTCGCGTTCCCGCAACTATCGAGACCTTC…
comp2266675_c0_seq1	3e-37	409	sp|Q03049|YD541_YEAST	Putative uncharacterized oxidoreductase YDR541C OS=Saccharomyces cerevisiae (strain ATCC 204508 / S288c) GN=YDR541C PE=3 SV=2	1.5e-33	374	sp|Q12068|GRE2_YEAST	NADPH-dependent methylglyoxal reductase GRE2 OS=Saccharomyces cerevisiae (strain ATCC 204508 / S288c) GN=GRE2 PE=1 SV=1	3.2e-33	371	sp|Q9UT59|YKJ7_SCHPO	Putative uncharacterized oxidoreductase C513.07 OS=Schizosaccharomyces pombe (strain 972 / ATCC 24843) GN=SPAC513.07 PE=3 SV=1		+	+		++	Candidate_Putative uncharacterized oxidoreductas	ATCAGATTCGCTGGCAGACGACATTTTGGTCACGTGACTTGGAGCCTACATCTGTGATCAAAATGGCAGCAGCAGAAGAGAGTCCGTTGGTGCTTGTAACCGGAGGAAGTGGGTTCATCGCCACGCACATCGTCCAACAGCTCCAAGAACAGGATTTCAAGGTCAGGACGACCGTTCGCAGTCTGGAAAATGAAGCCAAGGTCAACCCCATCAAGGAACTCTGCCCGGAGGCCAAACATGCTGTGGAGATAGTTGAGGCTGATTTGTCCAATGCCGAGTGCTGGGAGGATATCGTCAGCGGCTGTGCCTACGTCATCCACGTGGCCAGCCCCTTCCCATCCCAAGTACCAAACAATGAAGACGATGTCATCAAACCAGCCGTGGAAGGGACGGAAGCCA…	>comp2266675_c0_seq1_Candidate_Putative uncharacterized oxidoreductas ATCAGATTCGCTGGCAGACGACATTTTGGTCACGTGACTTGGAGCCTACATCTGTGATCAAAATGGCAGCAGCAGAAGAGAGTCCGTTGGTGCTTGTAACCGGAGGAAGTGGGTTCATCGCCACGCACATCGTCCAACAGCTCCAAGAACAGGATTTCAAGGTCAGGACGACCGTTCGCAGTCTGGAAAATGAAGCCAAGGTCAACCCCATCAAGGAACTCTGCCCGGAGGCCAAACATGCTGTGGAGATAGTTGAGGCTGATTTGTCCAATGCCGAGTGCTGGGAGGATATCGTCAGCGGCTGTGCCTACGTCATCCACGTGGCCAGC…
comp2263896_c0_seq3	2.7e-116	1155	sp|Q8WPW2|PDX1_SUBDO	Pyridoxal 5'-phosphate synthase subunit SNZERR OS=Suberites domuncula GN=SNZERR PE=2 SV=2	2.2e-105	1052	sp|O59905|PDX1_CERNC	Pyridoxal 5'-phosphate synthase subunit PDX1 OS=Cercospora nicotianae GN=PDX1 PE=1 SV=1	1.6e-104	1044	sp|Q9AT63|PDX1_GINBI	Probable pyridoxal 5'-phosphate synthase subunit PDX1 OS=Ginkgo biloba GN=PDX1 PE=2 SV=1		+			+		CTTGCATGGATGGGGTCAAACGCAGTATCTTTTGGAACCATCCCTGCACTGCAACACTACACTCAACCTCAACTTGCAAAATGCCCATCATTCCAGGAGTCCAAAATGGCAGTGCCTCTGATGGCGTGGCACCTATCGGAGAAAGTGTCACCCTTGGTTCCTTCACAGTTAAATCTGGTTTGGCCCAGATGGCCAAAGGAGGAGTCGTTATGGATGTGACAAATGCTGACCAAGCCAGGATTGCTGAGGAAGCAGGGGCATGTGCTGTTATGGCTTTGGAAAGAGTGCCAGCTGACATCAGAAAAGATGGCGGAGTGGCGAGGATGTGTGACCCTAAGATAATCAAAGAGATCATGCAAGCAGTAACAATCCCAGTGATGGCCAAGTCCAGAATCGGTC…	>comp2263896_c0_seq3 CTTGCATGGATGGGGTCAAACGCAGTATCTTTTGGAACCATCCCTGCACTGCAACACTACACTCAACCTCAACTTGCAAAATGCCCATCATTCCAGGAGTCCAAAATGGCAGTGCCTCTGATGGCGTGGCACCTATCGGAGAAAGTGTCACCCTTGGTTCCTTCACAGTTAAATCTGGTTTGGCCCAGATGGCCAAAGGAGGAGTCGTTATGGATGTGACAAATGCTGACCAAGCCAGGATTGCTGAGGAAGCAGGGGCATGTGCTGTTATGGCTTTGGAAAGAGTGCCAGCTGACATCAGAAAAGATGGCGGAGTGGCGAGGATGTGTGACCCTAAGATAATCAAAGAGATCATGCAAGCAGTAACAATCCCAGTGA…
comp2278031_c0_seq2	0	4133	sp|O17732|PYC1_CAEEL	Pyruvate carboxylase 1 OS=Caenorhabditis elegans GN=pyc-1 PE=1 SV=1	0	4120	sp|Q29RK2|PYC_BOVIN	Pyruvate carboxylase, mitochondrial OS=Bos taurus GN=PC PE=2 SV=2	0	4106	sp|Q05920|PYC_MOUSE	Pyruvate carboxylase, mitochondrial OS=Mus musculus GN=Pc PE=1 SV=1		+			+		GTTTTTTTGTCTTCAATAACAATTTATTGACCAAATTTTTACAGTTTTAGTCATCTGATAGTCAACCGTTATCTACATGTATATATTTAATACAGTACCAATTTCATTACTATTAATTCAATAACATGATTGTAACAGCCAATATAGATCTCCCAAGTATTAGGTAGAAAAGACAATTCGGAAATTTTTTTTAAAGGATGCTTATACCAAGATTTCATAATACATCTAATATTATCTAATATTACTTTCAACAATCTTCAAACCTATAAACGACATTAAAATTCATAATAGTAGAATGTGAAGGCATCACAATGCATACATTTACAGTAGCTGCCGGGTAGGATGTAAAATTAAATCACATAGGATCAGCAGGAAAAAGCAGGCACAAAAGAGCACGGG…	>comp2278031_c0_seq2 GTTTTTTTGTCTTCAATAACAATTTATTGACCAAATTTTTACAGTTTTAGTCATCTGATAGTCAACCGTTATCTACATGTATATATTTAATACAGTACCAATTTCATTACTATTAATTCAATAACATGATTGTAACAGCCAATATAGATCTCCCAAGTATTAGGTAGAAAAGACAATTCGGAAATTTTTTTTAAAGGATGCTTATACCAAGATTTCATAATACATCTAATATTATCTAATATTACTTTCAACAATCTTCAAACCTATAAACGACATTAAAATTCATAATAGTAGAATGTGAAGGCATCACAATGCATACATTTACAGTAGCTGCCGGGTAGGATGTAAAATTAAATCACATAGGATCAGCAGGAAAAA…
comp2273778_c1_seq23	9.5e-200	1701	sp|P35241|RADI_HUMAN	Radixin OS=Homo sapiens GN=RDX PE=1 SV=1	4.1e-199	1693	sp|P26043|RADI_MOUSE	Radixin OS=Mus musculus GN=Rdx PE=1 SV=3	1.8e-198	1693	sp|P26044|RADI_PIG	Radixin OS=Sus scrofa GN=RDX PE=2 SV=1		+			+		TTTTTTTCTTTTTTTTTTTTTTTGTATTTACCTGTCAATTGTTTATTGCCAACTGAGAAACACTGGAAGGTACAGCCTACAATGGAGGGTTCTGCTTAGAAGATGCACAGAAAATAATGAAAGATTTCATACAGCCTGGTCTCTGAAAGGCCACAAAAAACATGGTTCATCACAGAAAGTGTGAAAGACTCCTCACAAGAATTTCACAAGGCATCTCAAAGACAGTTATGTACAGAGGCAAGTTTAACAAACACTTTACAACCATGCAAATTAAGCTTAATTCTCAGAGGCAACATATAGTCTAATACAAATGTAAAATGTTTTTCTCTTTTGTACAAAATTCCTGATTAACAAACGAATGTCTCATTGACATTCTGAAGTACCACAATCTTCTACTCA…	>comp2273778_c1_seq23 TTTTTTTCTTTTTTTTTTTTTTTGTATTTACCTGTCAATTGTTTATTGCCAACTGAGAAACACTGGAAGGTACAGCCTACAATGGAGGGTTCTGCTTAGAAGATGCACAGAAAATAATGAAAGATTTCATACAGCCTGGTCTCTGAAAGGCCACAAAAAACATGGTTCATCACAGAAAGTGTGAAAGACTCCTCACAAGAATTTCACAAGGCATCTCAAAGACAGTTATGTACAGAGGCAAGTTTAACAAACACTTTACAACCATGCAAATTAAGCTTAATTCTCAGAGGCAACATATAGTCTAATACAAATGTAAAATGTTTTTCTCTTTTGTACAAAATTCCTGATTAACAAACGAATGTCTCATTGACATTCTG…
comp2259230_c0_seq1	1.9e-92	930	sp|Q9UN86|G3BP2_HUMAN	Ras GTPase-activating protein-binding protein 2 OS=Homo sapiens GN=G3BP2 PE=1 SV=2	1.9e-92	930	sp|Q5R9L3|G3BP2_PONAB	Ras GTPase-activating protein-binding protein 2 OS=Pongo abelii GN=G3BP2 PE=2 SV=1	2.4e-92	929	sp|P97379|G3BP2_MOUSE	Ras GTPase-activating protein-binding protein 2 OS=Mus musculus GN=G3bp2 PE=1 SV=2			+		+		CTACTTTTTTACTTGAGAAAATTTATCCTAGGCATATTTATTTGCATTGCCAAAACGTGCAGCAAGACATTCTTTTCAACGTTTTCTATTGATGGAAAATAAGTCATTAAAATACTTCCCAATAGGTTACATTTCACTACTGAATTACTAGTTGGTACAAGTAGATGTTCTCTCATACAATTAAAACATTCTAGATCTTCAAGGAACTTTGCACAACTGACCCGATTCAAAAAACACGTACAAATAAAAAGTTTACTTTCATAATGTTGAAGGGTCATCACTGGAGTGGGCGGAGCTGAGAGCAGCGGAAATGAGGAATGTCAAAAGACTAGTAAGACAGCTTTGAAGCCGTTCTGGTATGGGGGGAAAAGTCACTGTACAAAGGATAATAAAAAAAGA…	>comp2259230_c0_seq1 CTACTTTTTTACTTGAGAAAATTTATCCTAGGCATATTTATTTGCATTGCCAAAACGTGCAGCAAGACATTCTTTTCAACGTTTTCTATTGATGGAAAATAAGTCATTAAAATACTTCCCAATAGGTTACATTTCACTACTGAATTACTAGTTGGTACAAGTAGATGTTCTCTCATACAATTAAAACATTCTAGATCTTCAAGGAACTTTGCACAACTGACCCGATTCAAAAAACACGTACAAATAAAAAGTTTACTTTCATAATGTTGAAGGGTCATCACTGGAGTGGGCGGAGCTGAGAGCAGCGGAAATGAGGAATGTCAAAAGACTAGTAAGACAGCTTTGAAGCCGTTCTGGTATGGGGGGAAAAGTCACTGT…
gnl_Pdu_trscr_assembly_1_17807	6.2e-94	944	sp|P01122|RHO_APLCA	Ras-like GTP-binding protein RHO OS=Aplysia californica GN=RHO PE=2 SV=1	1e-91	923	sp|P48148|RHO1_DROME	Ras-like GTP-binding protein Rho1 OS=Drosophila melanogaster GN=Rho1 PE=1 SV=1	5.7e-91	916	sp|Q7T2E8|RHOAC_DANRE	Rho-related GTP-binding protein RhoA-C OS=Danio rerio GN=rhoac PE=1 SV=1			+		+		GGTCCGGAATTCCGGGATGGCCAATTGAGGTGTGGTCTGACTGGTCGGTCAAGAAACAACATTGCTGCAAGAATTTCACTGCTTCTATTCTCATATTTTGTCATTGAGCAAGGTGCAAGATGGCAGCGATCAGAAAGAAGCTGGTGATAGTGGGAGATGGTGCTTGTGGTAAAACCTGTCTCCTGATTGTGTTCAGCAAAGACCAGTTCCCTGAAGTGTATGTGCCTACAGTATTTGAAAACTATGTCGCAGACATAGAAGTAGATGGTAAACAAGTTGAACTAGCATTGTGGGATACTGCTGGACAGGAGGATTATGACAGACTGCGTCCACTCTCCTACCCCGACACGGATGTCATCTTGATGTGTTTCAGCATTGACAGCCCCGACAGTTTAGAAA…	>gnl_Pdu_trscr_assembly_1_17807 GGTCCGGAATTCCGGGATGGCCAATTGAGGTGTGGTCTGACTGGTCGGTCAAGAAACAACATTGCTGCAAGAATTTCACTGCTTCTATTCTCATATTTTGTCATTGAGCAAGGTGCAAGATGGCAGCGATCAGAAAGAAGCTGGTGATAGTGGGAGATGGTGCTTGTGGTAAAACCTGTCTCCTGATTGTGTTCAGCAAAGACCAGTTCCCTGAAGTGTATGTGCCTACAGTATTTGAAAACTATGTCGCAGACATAGAAGTAGATGGTAAACAAGTTGAACTAGCATTGTGGGATACTGCTGGACAGGAGGATTATGACAGACTGCGTCCACTCTCCTACCCCGACACGGATGTCATCTTGATGTG…
gnl_Pdu_trscr_assembly_1_1514	6e-96	963	sp|Q05974|RAB1A_LYMST	Ras-related protein Rab-1A OS=Lymnaea stagnalis GN=RAB1A PE=2 SV=1	9.7e-96	961	sp|P62822|RAB1A_CANLF	Ras-related protein Rab-1A OS=Canis lupus familiaris GN=RAB1A PE=1 SV=3	9.7e-96	961	sp|P62820|RAB1A_HUMAN	Ras-related protein Rab-1A OS=Homo sapiens GN=RAB1A PE=1 SV=3		+			+	Group_Ras_related proteins	ATGAATGCTGTATCTACGACTTTCAATTGCGCCTACCCCCCAACCGAGACAATTGGTCCGGAATTCCCGGGATGCCATATTGAAAGTCGTAGATACAGCATTCATACAAACTTGGGCTGTATCTTGTGCTGCTAATTGATTTGGTTTTCTTCAGTAGTGTCACTTGAGAGACTTTTACATCGTTGGCGGTGTACGTTATATGACAACAATGAACCCCGAATATGACTACCTGTTTAAATTGCTCCTCATCGGAGATTCTGGTGTCGGAAAGTCCTGTCTACTATTAAGATTTGCGGATGATACGTACACAGAAAGTTATATCTCCACCATTGGAGTAGATTTCAAAATAAGAACAATAGAATTGGATGGGAAGACAATAAAATTACAGATTTGGGATAC…	>gnl_Pdu_trscr_assembly_1_1514_Group_Ras_related proteins ATGAATGCTGTATCTACGACTTTCAATTGCGCCTACCCCCCAACCGAGACAATTGGTCCGGAATTCCCGGGATGCCATATTGAAAGTCGTAGATACAGCATTCATACAAACTTGGGCTGTATCTTGTGCTGCTAATTGATTTGGTTTTCTTCAGTAGTGTCACTTGAGAGACTTTTACATCGTTGGCGGTGTACGTTATATGACAACAATGAACCCCGAATATGACTACCTGTTTAAATTGCTCCTCATCGGAGATTCTGGTGTCGGAAAGTCCTGTCTACTATTAAGATTTGCGGATGATACGTACACAGAAAGTTATATCTCCACCATTGGAGTAGATT…
comp2265897_c0_seq5	1.4e-78	799	sp|P11233|RALA_HUMAN	Ras-related protein Ral-A OS=Homo sapiens GN=RALA PE=1 SV=1	1.8e-78	798	sp|P63321|RALA_MOUSE	Ras-related protein Ral-A OS=Mus musculus GN=Rala PE=1 SV=1	1.8e-78	798	sp|P63322|RALA_RAT	Ras-related protein Ral-A OS=Rattus norvegicus GN=Rala PE=1 SV=1			+		+	Group_Ras_related proteins	GTCCCTTCCTCATTAAATCAAAGAACACCTGAAACAAGTAAGACATCAAATTTAAGTACAACTATCACACATGAATCTCCCATACTTACCTGATTATTTTGTGCATCATATTACAAATCATGAAATGCATTGAAGACTAAAATCTGGATGACCGAATATATTAACAACATTGTCAATCAAATACTTTGCTCCTTTTTCTTCAAAATTACAAAACTACAATAGCTTGCGATAAAGTAGCCAACATTGTCAGCGAAAACATCAAGTCATCAAACAAAAGAACTAGTAATCCTTTATGATGTGATTAAACAACAGGTAATTATGGTTATTAATGACTCCATGTTTGATTTGGCAAGAAATCGACTCCCACAACAATTAGCAGTTGCAATCTTTAATAGGCCA…	>comp2265897_c0_seq5_Group_Ras_related proteins GTCCCTTCCTCATTAAATCAAAGAACACCTGAAACAAGTAAGACATCAAATTTAAGTACAACTATCACACATGAATCTCCCATACTTACCTGATTATTTTGTGCATCATATTACAAATCATGAAATGCATTGAAGACTAAAATCTGGATGACCGAATATATTAACAACATTGTCAATCAAATACTTTGCTCCTTTTTCTTCAAAATTACAAAACTACAATAGCTTGCGATAAAGTAGCCAACATTGTCAGCGAAAACATCAAGTCATCAAACAAAAGAACTAGTAATCCTTTATGATGTGATTAAACAACAGGTAATTATGGTTATTAATGACTCCATGTTTGATTTGGCA…
comp2270576_c0_seq1	2.2e-82	835	sp|Q6TEN1|RAP1B_DANRE	Ras-related protein Rap-1b OS=Danio rerio GN=rap1b PE=2 SV=1	5.8e-82	831	sp|P62833|RAP1A_BOVIN	Ras-related protein Rap-1A OS=Bos taurus GN=RAP1A PE=1 SV=1	5.8e-82	831	sp|P62834|RAP1A_HUMAN	Ras-related protein Rap-1A OS=Homo sapiens GN=RAP1A PE=1 SV=1			+		+	Group_Ras_related proteins	GACGTCACGGCTTCCCGTATCGTTGCCTCGCCTTGGAGAGAGACGGATACAAGTCTGGTGGAATTTCGATCGGTTTAACTCGTTTTTGGACAGTATCTGGTCTACCGTCGAGGTCCCCAGACCTTTGATCAAAAATGCGGGAGTACAAGCTTGTAGTTCTTGGCTCAGGAGGTGTGGGCAAAAGTGCTCTGACGGTCCAATTTGTCCAGGGCATCTTTGTTGAAAAATATGACCCCACGATTGAAGACAGCTACCGCAAGGTAGTTGAGGTAGATGGGCAGCAGTGTATGTTGGAAATTCTTGACACAGCTGGCACGGAACAATTCACGGCCATGAGAGACCTGTACATGAAGAACGGCCAGGGGTTCCTCTTGGTCTACTCCATCACAGCCCAGTCGA…	>comp2270576_c0_seq1_Group_Ras_related proteins GACGTCACGGCTTCCCGTATCGTTGCCTCGCCTTGGAGAGAGACGGATACAAGTCTGGTGGAATTTCGATCGGTTTAACTCGTTTTTGGACAGTATCTGGTCTACCGTCGAGGTCCCCAGACCTTTGATCAAAAATGCGGGAGTACAAGCTTGTAGTTCTTGGCTCAGGAGGTGTGGGCAAAAGTGCTCTGACGGTCCAATTTGTCCAGGGCATCTTTGTTGAAAAATATGACCCCACGATTGAAGACAGCTACCGCAAGGTAGTTGAGGTAGATGGGCAGCAGTGTATGTTGGAAATTCTTGACACAGCTGGCACGGAACAATTCACGGCCATGAGAGACCTGTACATGA…
comp2271307_c0_seq1	4.2e-230	2229	sp|P35601|RFC1_MOUSE	Replication factor C subunit 1 OS=Mus musculus GN=Rfc1 PE=1 SV=2	3e-181	1743	sp|P35251|RFC1_HUMAN	Replication factor C subunit 1 OS=Homo sapiens GN=RFC1 PE=1 SV=4	2.5e-145	1429	sp|P35600|RFC1_DROME	Replication factor C subunit 1 OS=Drosophila melanogaster GN=Gnf1 PE=1 SV=2		+			+		CCTTTTTTTTTGAAGAAATGATTTATTACAGAGTTAAAAGAATTACAAAGATGGCAAGAAGGCGTTGGTGTCTTAGCGAGCAGGTTGTTTGTCGGTTGTTCATCTGTCATTTACTCCAGGAGAAGATCCAAAAGTCGGGCAGCCAAACTCTTCTTGACTTGATCATCAGTTTCGGGAGGAGTAGCCTCGGAGGGGCATTGCTCAGGTAATTCTAGAGCTGGCCCGTCTGGGTCACATGCGGTCTTCATACAATTGACAAATTGAGTGGCCTTGGCACGACCAACACTAGTGTTGTCCACTAACTTGCAGAATTTCCTTTCAGCTTCGCTCGGCCTCTCTGCTCCGTCATCTCTATCTGGTTTTGCTGGTCTTTCCCCATCTGTTTCTGGTTTCTCCACA…	>comp2271307_c0_seq1 CCTTTTTTTTTGAAGAAATGATTTATTACAGAGTTAAAAGAATTACAAAGATGGCAAGAAGGCGTTGGTGTCTTAGCGAGCAGGTTGTTTGTCGGTTGTTCATCTGTCATTTACTCCAGGAGAAGATCCAAAAGTCGGGCAGCCAAACTCTTCTTGACTTGATCATCAGTTTCGGGAGGAGTAGCCTCGGAGGGGCATTGCTCAGGTAATTCTAGAGCTGGCCCGTCTGGGTCACATGCGGTCTTCATACAATTGACAAATTGAGTGGCCTTGGCACGACCAACACTAGTGTTGTCCACTAACTTGCAGAATTTCCTTTCAGCTTCGCTCGGCCTCTCTGCTCCGTCATCTCTATCTGGTTTTGCTGGTCTTTCCCCA…
gnl_Pdu_trscr_assembly_1_3867	1.6e-38	286	sp|Q8TC12|RDH11_HUMAN	Retinol dehydrogenase 11 OS=Homo sapiens GN=RDH11 PE=1 SV=2	2e-38	312	sp|Q8N5I4|DHRSX_HUMAN	Dehydrogenase/reductase SDR family member on chromosome X OS=Homo sapiens GN=DHRSX PE=1 SV=2	4.3e-38	290	sp|Q8BYK4|RDH12_MOUSE	Retinol dehydrogenase 12 OS=Mus musculus GN=Rdh12 PE=2 SV=1	+	+			++	Candidate_Retinol dehydrogenase	AGAGTACGCGGGGGATTTTGTGTTTAGATATCAGGGAAGTTACAACTTGGGGCAGCGGCAGTGAAGGATTGTTTTATTGATGTCATCAAGAAATTTTGTGTGCGCAGAAATCGTGCATAATTGAAGCTCATTGCGCAGGCTGCGGAGGTTGCGCTGCTGGCGGGTCCCTGATCGCTGTACGAAGTTGGGCGACGCATCTCCACCTCATTCAACGGGGAAATTTTACTGGAAAACGCTGTAAAGCACCATTGTAAAGTAAAATGACAGGACGAGTTATCGTAGTGACAGGAGCCAGTTCTGGCCTGGGTTATGAAGTAGCCCGCTACTTGTGCGAAGGAGGCAACGATGTCATCTTGGCATGCCGTAACGAGGAGAAGGCCAACCGCGCCATCGAGAAGA…	>gnl_Pdu_trscr_assembly_1_3867_Candidate_Retinol dehydrogenase AGAGTACGCGGGGGATTTTGTGTTTAGATATCAGGGAAGTTACAACTTGGGGCAGCGGCAGTGAAGGATTGTTTTATTGATGTCATCAAGAAATTTTGTGTGCGCAGAAATCGTGCATAATTGAAGCTCATTGCGCAGGCTGCGGAGGTTGCGCTGCTGGCGGGTCCCTGATCGCTGTACGAAGTTGGGCGACGCATCTCCACCTCATTCAACGGGGAAATTTTACTGGAAAACGCTGTAAAGCACCATTGTAAAGTAAAATGACAGGACGAGTTATCGTAGTGACAGGAGCCAGTTCTGGCCTGGGTTATGAAGTAGCCCGCTACTTGTGCGAAG…
comp2272559_c0_seq1	1.6e-45	497	sp|Q99PT1|GDIR1_MOUSE	Rho GDP-dissociation inhibitor 1 OS=Mus musculus GN=Arhgdia PE=1 SV=3	1.6e-45	497	sp|Q5XI73|GDIR1_RAT	Rho GDP-dissociation inhibitor 1 OS=Rattus norvegicus GN=Arhgdia PE=1 SV=1	4.3e-45	493	sp|P19803|GDIR1_BOVIN	Rho GDP-dissociation inhibitor 1 OS=Bos taurus GN=ARHGDIA PE=1 SV=3			+	+	++		TATTACGGTTGCTTTTGTAAACAGTTATCACTTATAAATCAGACTTCCACTAAATTTAGTTTTGAGTAGAAATTAAACTAATTGTCGTCAGTAGCAAATATTTACAATGAAATCGCAGATAGAGTACGTTCAGTACTATGTTATTAGTTCCACAGAAAAACAAACGGTAAAGACAATTTTAGTACACATAGGATTACAGCGATTCTTACAAAATCTTTTTGTGGAAAATTGCACTAATGTTAGAAGTTTTACAGTACAGATGCAGGCATCCTATGCCCATCTTATTCAAGCAGGTTCAGCTACTCGACACAATGGAGACAACGGAGAAGGCAACACTGAATATGGTAATGTAGCAATTTGGCAAGTTGGATGTTTCAATGCTTTTAATACAGTATTTTG…	>comp2272559_c0_seq1 TATTACGGTTGCTTTTGTAAACAGTTATCACTTATAAATCAGACTTCCACTAAATTTAGTTTTGAGTAGAAATTAAACTAATTGTCGTCAGTAGCAAATATTTACAATGAAATCGCAGATAGAGTACGTTCAGTACTATGTTATTAGTTCCACAGAAAAACAAACGGTAAAGACAATTTTAGTACACATAGGATTACAGCGATTCTTACAAAATCTTTTTGTGGAAAATTGCACTAATGTTAGAAGTTTTACAGTACAGATGCAGGCATCCTATGCCCATCTTATTCAAGCAGGTTCAGCTACTCGACACAATGGAGACAACGGAGAAGGCAACACTGAATATGGTAATGTAGCAATTTGGCAAGTTGGATGTTTCAA…
comp2252790_c0_seq1	0.012	111	sp|Q08329|RSMI_MICOL	Ribosomal RNA small subunit methyltransferase I (Fragment) OS=Micromonospora olivasterospora GN=rsmI PE=3 SV=1	0.99	85	sp|Q556V1|COQ10_DICDI	Coenzyme Q-binding protein COQ10, mitochondrial OS=Dictyostelium discoideum GN=coq10-1 PE=3 SV=1						+	+		++	Candidate RNA methyltransferase	TTTTTTTTTTTTTTTTTTTTTATGAAAAATCATTTATTTGGCTCCAATCAAAATACATTCACCCATGCAATGAATGAACAGAAGAAGATAATGAAAGATTTAACCAAAGAAAATATTGGTCAAGTCTACTTTCTGATAAAGATGATTGTTGCTAATGCAGAAGCCAAATCGTGCTAAAATTCAATAATACTAAAATAAAGTAAAATATGTACCTATGACTAAACAAGTAACAAGAAAATGAACATCTTAATCAACAGAAAAAATGCATAATAATTTGTTATACTCTGCAATGCGGAACCTTCTGAATTCAATGACAGAAGGAGTTGTGTTGTCAAGGTGCTCTGTGACATCATAAGTTTGGTGAATGACGTCATAATCATTTGAAACTTAAATGTCAGG…	>comp2252790_c0_seq1_Candidate RNA methyltransferase TTTTTTTTTTTTTTTTTTTTTATGAAAAATCATTTATTTGGCTCCAATCAAAATACATTCACCCATGCAATGAATGAACAGAAGAAGATAATGAAAGATTTAACCAAAGAAAATATTGGTCAAGTCTACTTTCTGATAAAGATGATTGTTGCTAATGCAGAAGCCAAATCGTGCTAAAATTCAATAATACTAAAATAAAGTAAAATATGTACCTATGACTAAACAAGTAACAAGAAAATGAACATCTTAATCAACAGAAAAAATGCATAATAATTTGTTATACTCTGCAATGCGGAACCTTCTGAATTCAATGACAGAAGGAGTTGTGTTGTCAAGGTGCTCTGTG…
comp2239022_c0_seq1	0.998	62	sp|C3NQJ0|RMF_VIBCJ	Ribosome modulation factor OS=Vibrio cholerae serotype O1 (strain MJ-1236) GN=rmf PE=3 SV=2										+			+		TTTTTTTTTTTTTTTTTTGCAAAAAGAGCACACAATCTTTATTGTAATACACAGTTACATATCATTCTCTAGTAACATATTACTTCACTGTTAAACATCTGAAGGAGCAGGGCGAACTACCGGCTGGGATTTGCCGCAGAGGCCTTGGCTCTTGAACTGCTGCAGCTGGGCCCCCATCTGCTGTTCAACCTGGTCAAGGTGGTATTGCGTCTTGACAGCGGCCGGGCATTTTCGGAAGCATTTCTTACTCCTCTCCATGATCCTGCATAGTTTTCCCATTCCTGTCTGACCGGCGTTTTGGCTTGCGGCTTGTATTTTTGCCTGGAATCGTTGAATGCACTTTTGCGTCCTTGTGATGCATTTGGGCATTTGCATCGGTGGAGACTCAGGTGGAGACTG…	>comp2239022_c0_seq1 TTTTTTTTTTTTTTTTTTGCAAAAAGAGCACACAATCTTTATTGTAATACACAGTTACATATCATTCTCTAGTAACATATTACTTCACTGTTAAACATCTGAAGGAGCAGGGCGAACTACCGGCTGGGATTTGCCGCAGAGGCCTTGGCTCTTGAACTGCTGCAGCTGGGCCCCCATCTGCTGTTCAACCTGGTCAAGGTGGTATTGCGTCTTGACAGCGGCCGGGCATTTTCGGAAGCATTTCTTACTCCTCTCCATGATCCTGCATAGTTTTCCCATTCCTGTCTGACCGGCGTTTTGGCTTGCGGCTTGTATTTTTGCCTGGAATCGTTGAATGCACTTTTGCGTCCTTGTGATGCATTTGGGCATTTGCATCGG…
comp2275107_c0_seq4	1e-33	418	sp|Q99PL5|RRBP1_MOUSE	Ribosome-binding protein 1 OS=Mus musculus GN=Rrbp1 PE=1 SV=2	3.9e-27	360	sp|Q939N5|GSPB_STRGN	Platelet binding protein GspB OS=Streptococcus gordonii GN=gspB PE=1 SV=1	8.1e-27	355	sp|C7IVR4|PQN41_CAEEL	Polyglutamine-repeat protein pqn-41 OS=Caenorhabditis elegans GN=pqn-41 PE=1 SV=2		+			+		TTTTTTTTTTTTTTTTTTTAAGTTGTATACCAATGAAAGGCACTTTATTATTCCATTCAAGAAACACATTTACAAAGCACTTAAAGCGTCTGATATTTCATCTACGTGTCATTTACACCGATAACAATTATTATCAAATTCACTGTACATAAATATAAAGAAATTATAATGCAGAAACAATAATATCAAGTTATCAAGCACTTCAGCTAGCACTAGTTTATAGTAAACATAAACACATGTAGACATAGCCTTTGATTTAGTTTATGGTGATAAAGACATCAAACATTCTTTACCATGTTAACGTATGCCTGGGTATACATGTATACATGTTGCTTTACGAAAGGGGAAGTAAGCCACTGCAATTCATGGTAAGCATACTCGAAACTAATTTTCCAAAAA…	>comp2275107_c0_seq4 TTTTTTTTTTTTTTTTTTTAAGTTGTATACCAATGAAAGGCACTTTATTATTCCATTCAAGAAACACATTTACAAAGCACTTAAAGCGTCTGATATTTCATCTACGTGTCATTTACACCGATAACAATTATTATCAAATTCACTGTACATAAATATAAAGAAATTATAATGCAGAAACAATAATATCAAGTTATCAAGCACTTCAGCTAGCACTAGTTTATAGTAAACATAAACACATGTAGACATAGCCTTTGATTTAGTTTATGGTGATAAAGACATCAAACATTCTTTACCATGTTAACGTATGCCTGGGTATACATGTATACATGTTGCTTTACGAAAGGGGAAGTAAGCCACTGCAATTCATGGTAAGCATAC…
comp2275674_c1_seq1	2e-28	334	sp|Q4R7F0|RBMX_MACFA	RNA-binding motif protein, X chromosome OS=Macaca fascicularis GN=RBMX PE=2 SV=1	2e-28	334	sp|P38159|RBMX_HUMAN	RNA-binding motif protein, X chromosome OS=Homo sapiens GN=RBMX PE=1 SV=3	2e-28	334	sp|A5A6M3|RBMX_PANTR	RNA-binding motif protein, X chromosome OS=Pan troglodytes GN=RBMX PE=2 SV=1		+			+		GGACGCCATTTTGGACCCAGTGAACGAGGAGAAAGGTGACCTCAGTTAATTTTGATGAACGGTTCAAAGTTTGAAATGGACAGACCAAGAGGAAGCCGAGGAGCCCCCAGGGGTGGACCGAGGGGAGCGCCAAGAGGAATGTCTCGCGGCAGAGGAGGACCACCAGGTATGAGAGGACCACCAGTGAGAGATTCTCGTCCCCCCTTCAAGGATTCACGAGGACCTCCCATGGGACGGGAATCCCGAGGACCCCCTATGAGAGAGTCCAGAGGGCCACCAAGAGAGTCGAGAGGGCCTCCCATGGGCAGGGGACCACCAAGAGAGTCTTTTGGAGAGCGGTCGAGCTACGGAGGACGCAGCAGTGAGTACAAGGACCCCTACAGAGAACCTCTGCCTTCT…	>comp2275674_c1_seq1 GGACGCCATTTTGGACCCAGTGAACGAGGAGAAAGGTGACCTCAGTTAATTTTGATGAACGGTTCAAAGTTTGAAATGGACAGACCAAGAGGAAGCCGAGGAGCCCCCAGGGGTGGACCGAGGGGAGCGCCAAGAGGAATGTCTCGCGGCAGAGGAGGACCACCAGGTATGAGAGGACCACCAGTGAGAGATTCTCGTCCCCCCTTCAAGGATTCACGAGGACCTCCCATGGGACGGGAATCCCGAGGACCCCCTATGAGAGAGTCCAGAGGGCCACCAAGAGAGTCGAGAGGGCCTCCCATGGGCAGGGGACCACCAAGAGAGTCTTTTGGAGAGCGGTCGAGCTACGGAGGACGCAGCAGTGAGTACAAGGACCCC…
comp2239691_c0_seq1	5.5e-70	718	sp|P04571|SCP_HEDDI	Sarcoplasmic calcium-binding protein OS=Hediste diversicolor PE=1 SV=1	4.9e-69	709	sp|P04572|SCP_PERVT	Sarcoplasmic calcium-binding protein OS=Perinereis vancaurica tetradentata PE=1 SV=1	3.8e-13	190	sp|P06495|CBP_SACER	Calerythrin OS=Saccharopolyspora erythraea PE=1 SV=1			+		+		TTTTTTTTTTTTTTTTTTTTAGGTACGTACAAAATGTTTTTAATTCTCTATAATACAAAACACATGAACAAGAAGTTAAACAGAATGGTACAATGATACAATTTATTCCAGTGAAGTGTCACTGCTGGACGTGGGCTGGTACTCTGACCATTCTTCACAATGATATAACATAGCACTTTTTCAGACGTGAGGGAGTCATTGGATTTCATATACATGTATATAGATATATAAAGCTTGGTAACTGTTCCTTGTATTTGTTGGTATTTTTGTGTACACAATGTTGTGATGTTACTCAAACAGTTCAGCTTAGGCCTATAAGAATGATGATATTCTCATTCATGTGTCATTACGTTTCATTTACGCAGCGTGACGATGATAGGTCAGCAGACGCAAATCGTA…	>comp2239691_c0_seq1 TTTTTTTTTTTTTTTTTTTTAGGTACGTACAAAATGTTTTTAATTCTCTATAATACAAAACACATGAACAAGAAGTTAAACAGAATGGTACAATGATACAATTTATTCCAGTGAAGTGTCACTGCTGGACGTGGGCTGGTACTCTGACCATTCTTCACAATGATATAACATAGCACTTTTTCAGACGTGAGGGAGTCATTGGATTTCATATACATGTATATAGATATATAAAGCTTGGTAACTGTTCCTTGTATTTGTTGGTATTTTTGTGTACACAATGTTGTGATGTTACTCAAACAGTTCAGCTTAGGCCTATAAGAATGATGATATTCTCATTCATGTGTCATTACGTTTCATTTACGCAGCGTGACGATGATA…
comp2272124_c0_seq1	1e-26	322	sp|P85521|C163A_BOVIN	Scavenger receptor cysteine-rich type 1 protein M130 OS=Bos taurus GN=CD163 PE=1 SV=2	1.5e-17	251	sp|O08762|NETR_MOUSE	Neurotrypsin OS=Mus musculus GN=Prss12 PE=2 SV=1	5.8e-26	315	sp|Q2VLH6|C163A_MOUSE	Scavenger receptor cysteine-rich type 1 protein M130 OS=Mus musculus GN=Cd163 PE=1 SV=2		+			+		GCAATTTTTTTTTTTGTATTTATCCACTAATTTATTAGAAATACCACCACCGCAAGACTTCTGTAGGCAGCCCAGTTCACACAATCAATAGTTAACCCTTGAGTGATGAGACTCATGAGAAGAGAAGCATTCGACTCCCACGTCCTCCGAGTGCCGACATTCGCTCACGCCCCATCCCGTATAAGGACATCCCGTGAGCTTTTCTTCATTCCCTGCGCACTCGGCCCGTGTCATCCAGATTTTACCGAGGCCAGGCCCAAACCAGCTTGGTGGCTTGATCAACCCGTCGCCATCCATGCCCAACTGACGACAGACGACCCTCAAGTCTCTGTCATCGAATCGGTCTTTGCAGACCGTCCCCCACTCGCCATTGTGAAAGACCTCAAGCCGACCTAGGAG…	>comp2272124_c0_seq1 GCAATTTTTTTTTTTGTATTTATCCACTAATTTATTAGAAATACCACCACCGCAAGACTTCTGTAGGCAGCCCAGTTCACACAATCAATAGTTAACCCTTGAGTGATGAGACTCATGAGAAGAGAAGCATTCGACTCCCACGTCCTCCGAGTGCCGACATTCGCTCACGCCCCATCCCGTATAAGGACATCCCGTGAGCTTTTCTTCATTCCCTGCGCACTCGGCCCGTGTCATCCAGATTTTACCGAGGCCAGGCCCAAACCAGCTTGGTGGCTTGATCAACCCGTCGCCATCCATGCCCAACTGACGACAGACGACCCTCAAGTCTCTGTCATCGAATCGGTCTTTGCAGACCGTCCCCCACTCGCCATTGTGAAA…
comp2263612_c1_seq1	1.6e-21	291	sp|Q9NR16|C163B_HUMAN	Scavenger receptor cysteine-rich type 1 protein M160 OS=Homo sapiens GN=CD163L1 PE=1 SV=2	6.9e-20	274	sp|Q5G266|NETR_TRAPH	Neurotrypsin OS=Trachypithecus phayrei GN=PRSS12 PE=3 SV=1	6.9e-20	274	sp|Q5G267|NETR_MACMU	Neurotrypsin OS=Macaca mulatta GN=PRSS12 PE=3 SV=1		+			+		TCTTTTTTGCTATGAAGATGACTCTTTATTAGACTTGAAAAAATGAAGCAAAGTTCTACCCCATAAAAATGTATTTAAAAAAACAACCATATAGCTTGATAAATTTGTGAAATAAATGTGTGGGGTCATTGCACTACTTTTTGCTCTGGATTCCAGAGGGCCAGTTTTATTTAAACAAGCAGCCTTTTCAATAAAATATCCCAAAATTTTACTTCTTAGACCTCCGTGGACTTTCGAAGTTTGACAAGTTGTGTTTACTTTGTCAGATGGAGCATTTCCGCAAAGAGAAAAGAACCTGCTCTTGAAATATACAAAAAGACCACTTCGAAATCATTCATGAAGCTCAAAATTCTAGAAGTTCTAAAATGGCCACCATGTGTCGGCCTCCTTGTCCTTAGT…	>comp2263612_c1_seq1 TCTTTTTTGCTATGAAGATGACTCTTTATTAGACTTGAAAAAATGAAGCAAAGTTCTACCCCATAAAAATGTATTTAAAAAAACAACCATATAGCTTGATAAATTTGTGAAATAAATGTGTGGGGTCATTGCACTACTTTTTGCTCTGGATTCCAGAGGGCCAGTTTTATTTAAACAAGCAGCCTTTTCAATAAAATATCCCAAAATTTTACTTCTTAGACCTCCGTGGACTTTCGAAGTTTGACAAGTTGTGTTTACTTTGTCAGATGGAGCATTTCCGCAAAGAGAAAAGAACCTGCTCTTGAAATATACAAAAAGACCACTTCGAAATCATTCATGAAGCTCAAAATTCTAGAAGTTCTAAAATGGCCACCATGT…
comp2276593_c0_seq3	9.2e-200	1141	sp|Q2PC93|SSPO_CHICK	SCO-spondin OS=Gallus gallus GN=SSPO PE=2 SV=1	3.2e-159	1024	sp|Q8CG65|SSPO_MOUSE	SCO-spondin OS=Mus musculus GN=Sspo PE=2 SV=2	2.1e-139	1310	sp|Q62635|MUC2_RAT	Mucin-2 (Fragment) OS=Rattus norvegicus GN=Muc2 PE=1 SV=1		+			+		CTGTGGAGCTTGTGGTGCCTGTGGTGTTTGTGGAGTCTGTGGTGCCTGTGGAACGCCTGGTATACCTGGTAGTTGTGGCCCTGGAGGTGGTGGTGGATTACCATTCTCAAGGCATCCTCTGACCAGGAAGAAGATGCTTGCAGGTGGTGTTCCACTTTCACATTTCATGCTGATTCTAAATCTGTCATTTATTTCTTCAATGGTAACTGTTTGGGATCCGGCTTCGGTGAAAGTCAAAGTTTCAGCTCTCAAATAATCATTTGTTGACAAATGGTAGACAAATTCAACAGTCAGGGGGCTTCCATCGCTGCAGACACTGTCGACCTTGATGTTGAATTCTGAAATTCTCAGTGGCACACTTGAGGCAAGAAGGATTTCGTTAAGGTCACTTGAGACGTA…	>comp2276593_c0_seq3 CTGTGGAGCTTGTGGTGCCTGTGGTGTTTGTGGAGTCTGTGGTGCCTGTGGAACGCCTGGTATACCTGGTAGTTGTGGCCCTGGAGGTGGTGGTGGATTACCATTCTCAAGGCATCCTCTGACCAGGAAGAAGATGCTTGCAGGTGGTGTTCCACTTTCACATTTCATGCTGATTCTAAATCTGTCATTTATTTCTTCAATGGTAACTGTTTGGGATCCGGCTTCGGTGAAAGTCAAAGTTTCAGCTCTCAAATAATCATTTGTTGACAAATGGTAGACAAATTCAACAGTCAGGGGGCTTCCATCGCTGCAGACACTGTCGACCTTGATGTTGAATTCTGAAATTCTCAGTGGCACACTTGAGGCAAGAAGGATTTC…
comp2278536_c1_seq38	2.2e-07	128	sp|Q8NUJ3|SRAP_STAAW	Serine-rich adhesin for platelets OS=Staphylococcus aureus (strain MW2) GN=sraP PE=3 SV=1	0.0067	124	sp|Q4L9P0|SRAP_STAHJ	Serine-rich adhesin for platelets OS=Staphylococcus haemolyticus (strain JCSC1435) GN=sraP PE=3 SV=1	0.0023	141	sp|Q939N5|GSPB_STRGN	Platelet binding protein GspB OS=Streptococcus gordonii GN=gspB PE=1 SV=1		+			+	Group_Serine-rich adhesin for platelets	TTACCGGATAACCACATTAAAATACCAATTAAGGAGTTCTGAGGCTGAGTAAGCCCGCAAGAGCTAGATTGGTGAAAAGTCTTGTGATTGTGACCAACTATATGATACAGAAGAAAGCTGACAATGCCCTTGAAAGATTGGTGAAAGCTCTGGTCAGAAGTTAAGTGGATTGTGCAATGATATGAACATCATCTCTGAATTGTTACTTCGAATGATTATTTCTATTTGTCTTTGTTTTTATATATGTCTGCTGACGATTTTCAAAAAATCTATCCAACAATCTTAAATTTTCATTTGCAATCATAGGCCTTAATAATATTTTGCTTTTTTCGTATTTCTTTTTTAAAAGTGACTTATTTATGAAGCATTGATTTCAGATCCAAAATGGAATAGTGAGAT…	>comp2278536_c1_seq38_Group_Serine-rich adhesin for platelets TTACCGGATAACCACATTAAAATACCAATTAAGGAGTTCTGAGGCTGAGTAAGCCCGCAAGAGCTAGATTGGTGAAAAGTCTTGTGATTGTGACCAACTATATGATACAGAAGAAAGCTGACAATGCCCTTGAAAGATTGGTGAAAGCTCTGGTCAGAAGTTAAGTGGATTGTGCAATGATATGAACATCATCTCTGAATTGTTACTTCGAATGATTATTTCTATTTGTCTTTGTTTTTATATATGTCTGCTGACGATTTTCAAAAAATCTATCCAACAATCTTAAATTTTCATTTGCAATCATAGGCCTTAATAATATTTTGCTTTTTTCGTATTT…
comp2278554_c0_seq4	7.7e-128	1314	sp|Q4L9P0|SRAP_STAHJ	Serine-rich adhesin for platelets OS=Staphylococcus haemolyticus (strain JCSC1435) GN=sraP PE=3 SV=1	2.3e-106	1111	sp|Q939N5|GSPB_STRGN	Platelet binding protein GspB OS=Streptococcus gordonii GN=gspB PE=1 SV=1	6.8e-58	664	sp|Q9I7U4|TITIN_DROME	Titin OS=Drosophila melanogaster GN=sls PE=1 SV=3			+		+	Group_Serine-rich adhesin for platelets	TGATTTTTCTGGTAGCATTATGAAGCTTTAATTGCAACATCAAAGAAATGTCACAGTAATGTCACAAGTTGCCTCTACATTGTACAAGTCACAACAATGACTTAAAGCCGTACAAGAGAATTCATTAACGCATCGAATAATTCTTGACAATAATAATAATAACAGAATTTTAACAAATTGCAAAAAATCATCGGTACTTAATTATCAAGTATGAGATTAAGCGATCCTCATGTCTCCATCTCTCACTCAACGCTCACTGCGGGAGAAGAGGATGATATCACCAACTTATCCGAGATTAAAACTTATAAAAACGCTATGATCACACCGTATAAGGCGCTCAGTATCATATATGCAACAAATCGTGGTTAGCCGTTCAAAAGACATATTCTTTCATCATCC…	>comp2278554_c0_seq4_Group_Serine-rich adhesin for platelets TGATTTTTCTGGTAGCATTATGAAGCTTTAATTGCAACATCAAAGAAATGTCACAGTAATGTCACAAGTTGCCTCTACATTGTACAAGTCACAACAATGACTTAAAGCCGTACAAGAGAATTCATTAACGCATCGAATAATTCTTGACAATAATAATAATAACAGAATTTTAACAAATTGCAAAAAATCATCGGTACTTAATTATCAAGTATGAGATTAAGCGATCCTCATGTCTCCATCTCTCACTCAACGCTCACTGCGGGAGAAGAGGATGATATCACCAACTTATCCGAGATTAAAACTTATAAAAACGCTATGATCACACCGTATAAGGCGCT…
comp2270845_c1_seq1	3.7e-190	1852	sp|A4FV68|2A5E_BOVIN	Serine/threonine-protein phosphatase 2A 56 kDa regulatory subunit epsilon isoform OS=Bos taurus GN=PPP2R5E PE=1 SV=1	3.7e-190	1852	sp|Q16537|2A5E_HUMAN	Serine/threonine-protein phosphatase 2A 56 kDa regulatory subunit epsilon isoform OS=Homo sapiens GN=PPP2R5E PE=1 SV=1	3.7e-190	1852	sp|Q61151|2A5E_MOUSE	Serine/threonine-protein phosphatase 2A 56 kDa regulatory subunit epsilon isoform OS=Mus musculus GN=Ppp2r5e PE=1 SV=3			+	+	++		CTCCCATGGCCTTTCCTCCTTTTCAGACTGAATTTACAGGGTAAATGCAAGTACAGGTGAAAATGAACAGTTCAGTGATGCATTATAGGTTTCTAAAAGTTACACATGGCCACAGAAACGGGAAGCGCCGTGTCTACATCATTCATTCGCGGGAAACATCTATCCAGTGTGGAACAAGTGACATGACCTTGCACTCATTGCAGTTATATATATCATTTCACTGAGAACTAGTCAACATTTAATCAAATATATAAACACTCTCCCTGTCTGCACAGTATAGCCACCATATTTCATGCTATTATTTTACAAATTATTTACTCGTCATCACTTCAACGTAAGCTCTAACAACCTCCAACCAAACAGAAGGTGCTACTAACATAAACTGGAAGAAATATTGTA…	>comp2270845_c1_seq1 CTCCCATGGCCTTTCCTCCTTTTCAGACTGAATTTACAGGGTAAATGCAAGTACAGGTGAAAATGAACAGTTCAGTGATGCATTATAGGTTTCTAAAAGTTACACATGGCCACAGAAACGGGAAGCGCCGTGTCTACATCATTCATTCGCGGGAAACATCTATCCAGTGTGGAACAAGTGACATGACCTTGCACTCATTGCAGTTATATATATCATTTCACTGAGAACTAGTCAACATTTAATCAAATATATAAACACTCTCCCTGTCTGCACAGTATAGCCACCATATTTCATGCTATTATTTTACAAATTATTTACTCGTCATCACTTCAACGTAAGCTCTAACAACCTCCAACCAAACAGAAGGTGCTACTAACA…
comp2268937_c0_seq1	3.6e-57	597	sp|P25169|AT1B1_ARTSF	Sodium/potassium-transporting ATPase subunit beta OS=Artemia franciscana PE=2 SV=1	3.1e-51	541	sp|Q24048|ATPB2_DROME	Sodium/potassium-transporting ATPase subunit beta-2 OS=Drosophila melanogaster GN=nrv2 PE=1 SV=2	1.5e-44	478	sp|Q9XUY5|AT1B3_CAEEL	Probable sodium/potassium-transporting ATPase subunit beta-3 OS=Caenorhabditis elegans GN=nkb-3 PE=3 SV=1		+			+		CCCAGTTGTTGAAGTCTATTGAGCTGAGGCCCAGAGGAGTTACAGGGGTTAGCCAGGAATACCATAGCCTAAGCTGGTGGATTGGAGTGGCCCAAAAACACTAATTATTGAAGCACTGTGCACAACAGGTCAAAGGAGACAGACACACACTCAGGACAGCTCAGAGGATAGACAAGACAGCAGAAAAAAAGGGCGGGAATTTAAAATTATTAATTAGTTTTCATACTGCCCGCTTGGCGCCGTCCCAATCGCTCATAGACTTATTGTACATCCGGGCACTGCTTGCCTCATTCCGACCTTATTCCGGTGGTCAACATGGCGTCTACAGAGATCGAGTACAAGGATGGGACACAAGAAAAGCCAGGAATGGGAGGCCGAATGTCAAATTTCAAGAAAGGC…	>comp2268937_c0_seq1 CCCAGTTGTTGAAGTCTATTGAGCTGAGGCCCAGAGGAGTTACAGGGGTTAGCCAGGAATACCATAGCCTAAGCTGGTGGATTGGAGTGGCCCAAAAACACTAATTATTGAAGCACTGTGCACAACAGGTCAAAGGAGACAGACACACACTCAGGACAGCTCAGAGGATAGACAAGACAGCAGAAAAAAAGGGCGGGAATTTAAAATTATTAATTAGTTTTCATACTGCCCGCTTGGCGCCGTCCCAATCGCTCATAGACTTATTGTACATCCGGGCACTGCTTGCCTCATTCCGACCTTATTCCGGTGGTCAACATGGCGTCTACAGAGATCGAGTACAAGGATGGGACACAAGAAAAGCCAGGAATGGGAGGCCGA…
comp2260058_c0_seq1	1.7e-66	685	sp|P42577|FRIS_LYMST	Soma ferritin OS=Lymnaea stagnalis PE=2 SV=2	1.1e-57	602	sp|P85838|FRIH_TREBE	Ferritin, heavy subunit OS=Trematomus bernacchii PE=1 SV=1	2.2e-57	599	sp|P85837|FRIH_TRENE	Ferritin, heavy subunit OS=Trematomus newnesi PE=1 SV=1	+	+	+	+	++++	Candidate_Soma_Ferritin	CAAAGCGGTAACAGCCGCGTGGAGGTATAAAGCCATGTGCGGCGTGAAAATTCGTCAGACTTGTATCGACTGCTTCTTGGGACGTCAGTGTACGTACGGATCAGCGGTACTTCCTCAAATTCCCTAATTTGACATCAATTTATTCAACTTTGTTCTACTGAACCAATACCTGCAACTAAAATGGCTTCAAGAGAGACCCAACCTCGTCAAAACTACCATGAGAACTGCGAAGCAGGCATCAACAAACAGATCAACCTGGAACTCTACGCCAGCTATGTCTACAGCTCCATGGCATTCTACTTTGACCGTGATGACGTAGCTCTGCCAGGGTTCCACAACTTCTTTAAGAAGTCTTCCCATGAAGAGAGGGAACATGCCGAGAAGTTCATGAAGTATCAG…	>comp2260058_c0_seq1_Candidate_Soma_Ferritin CAAAGCGGTAACAGCCGCGTGGAGGTATAAAGCCATGTGCGGCGTGAAAATTCGTCAGACTTGTATCGACTGCTTCTTGGGACGTCAGTGTACGTACGGATCAGCGGTACTTCCTCAAATTCCCTAATTTGACATCAATTTATTCAACTTTGTTCTACTGAACCAATACCTGCAACTAAAATGGCTTCAAGAGAGACCCAACCTCGTCAAAACTACCATGAGAACTGCGAAGCAGGCATCAACAAACAGATCAACCTGGAACTCTACGCCAGCTATGTCTACAGCTCCATGGCATTCTACTTTGACCGTGATGACGTAGCTCTGCCAGGGTTCCACAACTTCTTTAAGAAGTCT…
comp2278480_c0_seq4	3.3e-276	2664	sp|Q62261|SPTB2_MOUSE	Spectrin beta chain, non-erythrocytic 1 OS=Mus musculus GN=Sptbn1 PE=1 SV=2	1.1e-275	2659	sp|Q01082|SPTB2_HUMAN	Spectrin beta chain, non-erythrocytic 1 OS=Homo sapiens GN=SPTBN1 PE=1 SV=2	2.1e-274	2647	sp|Q00963|SPTCB_DROME	Spectrin beta chain OS=Drosophila melanogaster GN=beta-Spec PE=1 SV=2		+			+		CCGACCTGCAGCACCGACTGCAAGTGGGAGTGACGGGCCTGCATCTCATCTTCATTGGCCTTATGCTTGCTAATAAGCAACTGCACGGATGTCAGATCGCGGCCAAGATCAGGGGAGCACATGAGAGTCTCCTTCTCCTTGATCCAACCCTCCTCGTCGGCCATGTCCCAGTAGAACTGCCACAATTTGCGAGACTCGTCCAACTTGGAGCGACGGTCCTTCGCCAACTGCTTCAGCTCTTCGTAGGCGGCGTCCAAGTGGTCCATGCGGTCTTTGACCACTTGTGGGTCGCATGGCTTGTAGCTCTCTGGTTTGTCTGAGCCCTCCTTGGTCACTTCTCCTGCTTCGGGGAACTCGCCATCGACGAATTTGCTGGCCTGGTGATTGACGCTCTTGACG…	>comp2278480_c0_seq4 CCGACCTGCAGCACCGACTGCAAGTGGGAGTGACGGGCCTGCATCTCATCTTCATTGGCCTTATGCTTGCTAATAAGCAACTGCACGGATGTCAGATCGCGGCCAAGATCAGGGGAGCACATGAGAGTCTCCTTCTCCTTGATCCAACCCTCCTCGTCGGCCATGTCCCAGTAGAACTGCCACAATTTGCGAGACTCGTCCAACTTGGAGCGACGGTCCTTCGCCAACTGCTTCAGCTCTTCGTAGGCGGCGTCCAAGTGGTCCATGCGGTCTTTGACCACTTGTGGGTCGCATGGCTTGTAGCTCTCTGGTTTGTCTGAGCCCTCCTTGGTCACTTCTCCTGCTTCGGGGAACTCGCCATCGACGAATTTGCTGGCC…
comp2268336_c0_seq2	1e-13	220	sp|Q01443|SSP2_PLAYO	Sporozoite surface protein 2 OS=Plasmodium yoelii yoelii GN=SSP2 PE=1 SV=2	5.2e-12	187	sp|P05142|PRH1_MOUSE	Proline-rich protein HaeIII subfamily 1 OS=Mus musculus GN=Prh1 PE=2 SV=2	1.1e-10	194	sp|Q9QR71|ORF73_HHV8P	Protein ORF73 OS=Human herpesvirus 8 type P (isolate GK18) GN=ORF73 PE=1 SV=1			+		+		GCCAATATTCCTCACTGACACAGGTGTCTGTGGCAAAGTTGCAATACGTGTCAGTGAGGAAAAGTTGGCATTTCTGCCATTAAGTGGTTAAAATAGCTTGCCTATGTTACCCTTGATTGCCAACGTTACCCAGTTCCACGGTAAGTGATGCACAACAGCTCACTACACAACTCATCAGAAGTGCGACTAATGGAAGTGCAGCAAATGGGGAACTTTCTTTAATAAATATCCTACGATTACAAACTTGCGCTACAATACACAATAATCAAAATCTGAATAAAAAAGCATTACTGAATTTACACACAACAGGTCAACAGCTGTTTCATCTATCATGTGCCGAAGGTCCTTAAGTTGTGCGCTTAATCTAATTAATGCCTCTTCCGGTGTACCTTTAGATGC…	>comp2268336_c0_seq2 GCCAATATTCCTCACTGACACAGGTGTCTGTGGCAAAGTTGCAATACGTGTCAGTGAGGAAAAGTTGGCATTTCTGCCATTAAGTGGTTAAAATAGCTTGCCTATGTTACCCTTGATTGCCAACGTTACCCAGTTCCACGGTAAGTGATGCACAACAGCTCACTACACAACTCATCAGAAGTGCGACTAATGGAAGTGCAGCAAATGGGGAACTTTCTTTAATAAATATCCTACGATTACAAACTTGCGCTACAATACACAATAATCAAAATCTGAATAAAAAAGCATTACTGAATTTACACACAACAGGTCAACAGCTGTTTCATCTATCATGTGCCGAAGGTCCTTAAGTTGTGCGCTTAATCTAATTAATGCCTC…
comp2278010_c1_seq9	6.2e-22	291	sp|P18899|DDR48_YEAST	Stress protein DDR48 OS=Saccharomyces cerevisiae (strain ATCC 204508 / S288c) GN=DDR48 PE=1 SV=4	3.5e-18	263	sp|P11414|RPB1_CRIGR	DNA-directed RNA polymerase II subunit RPB1 (Fragment) OS=Cricetulus griseus GN=POLR2A PE=3 SV=1	8.2e-18	238	sp|Q59X49|DDR48_CANAL	Stress protein DDR48 OS=Candida albicans (strain SC5314 / ATCC MYA-2876) GN=DDR48 PE=1 SV=1		+			+		CTACTCCCTGTGCCTGCAACTGCCACTATACTGCTTGCAGACACTGCTTGCAGATACTTTAGGCTGGAGCTGTGGTCTTAGGAATACTACCATGATATAATGAAAGGGAAGATGTGGTAGTCGAGAGGTCGTGTGACTGAAGAAGTCATGGATTTCTTCGGGCGGCGGGCCAGCACCAGCATTGTGGAGGGCGGATCCAAGCTCTTTGGGTCCGTCATGGGAGCCACAGATGGCCTGTTCAGCAACATCACTTCAGCCATCAAGGGCTCAGTGAGTGCAGGTGCCACGCCCATACAATCCACACAGTCCAGTCCGCAGCGCTCCCCTGCACGGACGCCTGACCCTTCAGGCACCCAGTCCCTGCCCCAGTCGCCAAAACTGGGTGCTCGCGGCTTGGTA…	>comp2278010_c1_seq9 CTACTCCCTGTGCCTGCAACTGCCACTATACTGCTTGCAGACACTGCTTGCAGATACTTTAGGCTGGAGCTGTGGTCTTAGGAATACTACCATGATATAATGAAAGGGAAGATGTGGTAGTCGAGAGGTCGTGTGACTGAAGAAGTCATGGATTTCTTCGGGCGGCGGGCCAGCACCAGCATTGTGGAGGGCGGATCCAAGCTCTTTGGGTCCGTCATGGGAGCCACAGATGGCCTGTTCAGCAACATCACTTCAGCCATCAAGGGCTCAGTGAGTGCAGGTGCCACGCCCATACAATCCACACAGTCCAGTCCGCAGCGCTCCCCTGCACGGACGCCTGACCCTTCAGGCACCCAGTCCCTGCCCCAGTCGCCAAAA…
comp2271637_c0_seq1	2.7e-148	1457	sp|Q4R517|SUCB1_MACFA	Succinate--CoA ligase [ADP-forming] subunit beta, mitochondrial OS=Macaca fascicularis GN=SUCLA2 PE=2 SV=1	3.4e-148	1456	sp|Q9P2R7|SUCB1_HUMAN	Succinate--CoA ligase [ADP-forming] subunit beta, mitochondrial OS=Homo sapiens GN=SUCLA2 PE=1 SV=3	4.4e-148	1455	sp|O97580|SUCB1_PIG	Succinate--CoA ligase [ADP-forming] subunit beta, mitochondrial (Fragment) OS=Sus scrofa GN=SUCLA2 PE=2 SV=1		+			+		ATTGGAGTCTGGATAATCCACGAGGTGGCAGCAGCTGCAAGGGCAAAGGAGGTCAGAAGAAAATGGCGTCTGCACTTGTCAAGGGGGTCCGGCTGCTGGGCAAACTGGGCCGCACGGGTGTGCTCAAGGCACCCACTGGGGCGAGCGCACCATGCATGATTGGCCAGCAGTCGCGCAGTCTGTCCATCCACGAGTACCTGGCTATGAACCTTCTGCAGGAGAACGGCGTCACTGTTCCCAAGTACCAGATTGCGGATTCTGCTGAAAAGACCTTCCAAATAGCTGAGGAATTTGGCAACACCACAGGAACGAAAGATGTAGTAATAAAGGCCCAGGTGTTAGCAGGCGGCCGAGGCAAGGGTCATTTTGAAAGTGGACTGAAAGGAGGTGTCAAGATTG…	>comp2271637_c0_seq1 ATTGGAGTCTGGATAATCCACGAGGTGGCAGCAGCTGCAAGGGCAAAGGAGGTCAGAAGAAAATGGCGTCTGCACTTGTCAAGGGGGTCCGGCTGCTGGGCAAACTGGGCCGCACGGGTGTGCTCAAGGCACCCACTGGGGCGAGCGCACCATGCATGATTGGCCAGCAGTCGCGCAGTCTGTCCATCCACGAGTACCTGGCTATGAACCTTCTGCAGGAGAACGGCGTCACTGTTCCCAAGTACCAGATTGCGGATTCTGCTGAAAAGACCTTCCAAATAGCTGAGGAATTTGGCAACACCACAGGAACGAAAGATGTAGTAATAAAGGCCCAGGTGTTAGCAGGCGGCCGAGGCAAGGGTCATTTTGAAAGTGGAC…
comp2251386_c0_seq2	4.8e-55	577	sp|P10791|SODC_DROVI	Superoxide dismutase [Cu-Zn] OS=Drosophila virilis GN=Sod PE=3 SV=2	4.3e-54	568	sp|Q95086|SODC_DROPS	Superoxide dismutase [Cu-Zn] OS=Drosophila pseudoobscura pseudoobscura GN=Sod PE=3 SV=3	5.5e-54	567	sp|P28757|SODC2_ORYSJ	Superoxide dismutase [Cu-Zn] 2 OS=Oryza sativa subsp. japonica GN=SODCC2 PE=1 SV=2		+			+		ATCGAATACATAACATCGCTTTATTCTAGGCAAGTTTTCTGTAAGTTATATACTTACATTTCAACATGTTACAAGGCAAATGCATTTTAATACTCTGGTGTTCCAGTGGTGAACATTTCGCAATTAAATTGCCACCTAATTGTTTGAAAATACATGAACAGTGATTTACAGAACAGACGTTTGTTATGTGACATTAATTTACATATCTTACATATATATTACAATCATCACGACATAAAGGTTTCACGTTATAGTCACAGAAGTTCTATGCGAAGTAGTTTGGCAGATTTGTTCGAGAACCGAAAGTGTCTATTTTGTGATTCCGATGACCCCGCAAGCGAGACGTCCTCCTGCGTTTCCAGTCGTCTTGCTGAGTTCATGACCGCCCTTTCCGAGGTC…	>comp2251386_c0_seq2 ATCGAATACATAACATCGCTTTATTCTAGGCAAGTTTTCTGTAAGTTATATACTTACATTTCAACATGTTACAAGGCAAATGCATTTTAATACTCTGGTGTTCCAGTGGTGAACATTTCGCAATTAAATTGCCACCTAATTGTTTGAAAATACATGAACAGTGATTTACAGAACAGACGTTTGTTATGTGACATTAATTTACATATCTTACATATATATTACAATCATCACGACATAAAGGTTTCACGTTATAGTCACAGAAGTTCTATGCGAAGTAGTTTGGCAGATTTGTTCGAGAACCGAAAGTGTCTATTTTGTGATTCCGATGACCCCGCAAGCGAGACGTCCTCCTGCGTTTCCAGTCGTCTTGCTGAGTTC…
comp2277680_c0_seq25	1.8e-107	912	sp|Q5R9B4|FMR1_PONAB	Synaptic functional regulator FMR1 OS=Pongo abelii GN=FMR1 PE=2 SV=1	8e-107	907	sp|Q80WE1|FMR1_RAT	Synaptic functional regulator FMR1 OS=Rattus norvegicus GN=Fmr1 PE=1 SV=2	2.1e-98	1001	sp|Q61584|FXR1_MOUSE	Fragile X mental retardation syndrome-related protein 1 OS=Mus musculus GN=Fxr1 PE=1 SV=2			+		+		ATCTCTGCGAGAACTTCTCCGATTGGCCGATTCCACGAGTGACCTATTAACTCGACCAATCACAGAAGTTCTCACAAGGGTGATCTCTGTGAGAACTTCTCTGATTGGCCAATTCCACAAATGACCTTTTTGCAGTCAAGATGAAGTTAGCAGGTTCAGTGAGAGCACAGTACCTTCGAATACTTTTGTGACAAATAAAGAAAAAGATGGCTCTGGCCTGTGACCCAGCACATGTTATTTCGCCCTTTTTATCTTATCAAGAGAGTGTACAGAATCAACTTTAGCATCTGTCGATAACACTTGTTACTAAAGAGTATATACTCTTGTTTCATTCTCATAACCTCAATACAAATATTCCTTAACTGTCATCAAATATATAAGAAATAATTATCTTCTTAT…	>comp2277680_c0_seq25 ATCTCTGCGAGAACTTCTCCGATTGGCCGATTCCACGAGTGACCTATTAACTCGACCAATCACAGAAGTTCTCACAAGGGTGATCTCTGTGAGAACTTCTCTGATTGGCCAATTCCACAAATGACCTTTTTGCAGTCAAGATGAAGTTAGCAGGTTCAGTGAGAGCACAGTACCTTCGAATACTTTTGTGACAAATAAAGAAAAAGATGGCTCTGGCCTGTGACCCAGCACATGTTATTTCGCCCTTTTTATCTTATCAAGAGAGTGTACAGAATCAACTTTAGCATCTGTCGATAACACTTGTTACTAAAGAGTATATACTCTTGTTTCATTCTCATAACCTCAATACAAATATTCCTTAACTGTCATCAAATATA…
comp2273765_c1_seq6	8.2e-41	446	sp|P47194|SYB_DORPE	Synaptobrevin OS=Doryteuthis pealeii PE=1 SV=1	8.9e-38	419	sp|P35589|SYB_APLCA	Synaptobrevin OS=Aplysia californica PE=2 SV=1	5.1e-35	394	sp|P13701|SYB_TETCF	Synaptobrevin OS=Tetronarce californica PE=2 SV=1			+		+		GCCATCTTGGCAGCCATCTTGGATCATAGGTATCCTAACTCTATGTCTATGTCTTGGATACATTCAAGAATCAAAATGGCTTCCGCGCAAGATGGCCGCCGGACATTTCAGAGGCAGTTAGTCCAAGAATGCACAATGCTAATATCATACTTGTTATATCTCACAGTCACAAGTTATGGTTGCTGTTAACTAATGACTCAACATAACAGGCTTAATACCTAATACCAAGAGGATACAATTCAGAGAATACATCCAACCATCAGTTCAAAATAAACTTCATTCCTATCAATTAGCTACTTCACTGATCATTAGTTTAACAACAATTACCTTGACAAATTGCCAAAATACACGAGCCAGGCCATTATTCCAATACGAACATTATTCTAAAATGATAGTGCA…	>comp2273765_c1_seq6 GCCATCTTGGCAGCCATCTTGGATCATAGGTATCCTAACTCTATGTCTATGTCTTGGATACATTCAAGAATCAAAATGGCTTCCGCGCAAGATGGCCGCCGGACATTTCAGAGGCAGTTAGTCCAAGAATGCACAATGCTAATATCATACTTGTTATATCTCACAGTCACAAGTTATGGTTGCTGTTAACTAATGACTCAACATAACAGGCTTAATACCTAATACCAAGAGGATACAATTCAGAGAATACATCCAACCATCAGTTCAAAATAAACTTCATTCCTATCAATTAGCTACTTCACTGATCATTAGTTTAACAACAATTACCTTGACAAATTGCCAAAATACACGAGCCAGGCCATTATTCCAATACGAACA…
comp2278238_c1_seq2	1e-139	1376	sp|Q6R748|STXB1_CHICK	Syntaxin-binding protein 1 OS=Gallus gallus GN=STXBP1 PE=2 SV=1	1.3e-139	1375	sp|P61763|STXB1_BOVIN	Syntaxin-binding protein 1 OS=Bos taurus GN=STXBP1 PE=1 SV=1	1.3e-139	1375	sp|P61764|STXB1_HUMAN	Syntaxin-binding protein 1 OS=Homo sapiens GN=STXBP1 PE=1 SV=1			+		+		GTTTTTTTTGCATATTTAGAGTGATTTATTGATCCTTAGGTTCATCTACATGAATATAACAAGAGTAAACTGCTGTATGCACATTGAAGCTTAGATATAGGCCTTTGGGAGGCAGCGGAAACTAGGTGGAATGTCTGTCTAATATTTGAAATGGGTTTTCATAGGAAATCATCAGGCATAAATCTCCTTTAGTGAAAGTACATGATAATCATGATTTGATATAGTATCAGCCTTGAGTTCTCAAACATTACGAATGGGATAAGCAAAGAAATTAATCTGTTCGTATTATCAAACCATACCACTGCCTAACTGAGAGAATCCAAACACCAACAACTTAGGATAATTGGAATCTTATTGCACAAGTAACTAACAGTTCTTCAATCTTACATGTAATATATA…	>comp2278238_c1_seq2 GTTTTTTTTGCATATTTAGAGTGATTTATTGATCCTTAGGTTCATCTACATGAATATAACAAGAGTAAACTGCTGTATGCACATTGAAGCTTAGATATAGGCCTTTGGGAGGCAGCGGAAACTAGGTGGAATGTCTGTCTAATATTTGAAATGGGTTTTCATAGGAAATCATCAGGCATAAATCTCCTTTAGTGAAAGTACATGATAATCATGATTTGATATAGTATCAGCCTTGAGTTCTCAAACATTACGAATGGGATAAGCAAAGAAATTAATCTGTTCGTATTATCAAACCATACCACTGCCTAACTGAGAGAATCCAAACACCAACAACTTAGGATAATTGGAATCTTATTGCACAAGTAACTAACAGTTCTT…
comp2254376_c0_seq1	9.5e-208	2018	sp|Q2T9X2|TCPD_BOVIN	T-complex protein 1 subunit delta OS=Bos taurus GN=CCT4 PE=1 SV=3	2e-207	2015	sp|P50991|TCPD_HUMAN	T-complex protein 1 subunit delta OS=Homo sapiens GN=CCT4 PE=1 SV=4	5.3e-207	2011	sp|Q5R637|TCPD_PONAB	T-complex protein 1 subunit delta OS=Pongo abelii GN=CCT4 PE=2 SV=3		+			+		TACATCTGAGCGGAAAGTTCTGGGAGCCGGTGCCGGTGCATGACTCAACACGGTGCTGTGAAAATCCAGAAGAATCCATCAAAATCCAGCTCCATCCTTGCTTGATCGAGTAATTAAATCCCAGAAAAATGACTGGAAGAGGCAAAAAAGCCGAGTACAAGGACAAGGACAAGCCTACTCACATCAGATTGAGCAACATTACCGCTGGAAAAGCTGTCTCAGATGCCATTCGCACAAGTCTTGGCCCAAGGGGTATGGATAAAATGATCCAGGCCTCTGGGGGAGATGTAACAATTACAAATGATGGCGCCACAATCTTGAAGCAGATGCAGGTGCTGCACCCTGCTGCCAAAATGTTAGTCGAGCTGTCAAAAGCTCAAGATGTTGAAGCTGGGGACG…	>comp2254376_c0_seq1 TACATCTGAGCGGAAAGTTCTGGGAGCCGGTGCCGGTGCATGACTCAACACGGTGCTGTGAAAATCCAGAAGAATCCATCAAAATCCAGCTCCATCCTTGCTTGATCGAGTAATTAAATCCCAGAAAAATGACTGGAAGAGGCAAAAAAGCCGAGTACAAGGACAAGGACAAGCCTACTCACATCAGATTGAGCAACATTACCGCTGGAAAAGCTGTCTCAGATGCCATTCGCACAAGTCTTGGCCCAAGGGGTATGGATAAAATGATCCAGGCCTCTGGGGGAGATGTAACAATTACAAATGATGGCGCCACAATCTTGAAGCAGATGCAGGTGCTGCACCCTGCTGCCAAAATGTTAGTCGAGCTGTCAAAAGCTC…
comp2267718_c0_seq1	2.6e-214	2080	sp|P50143|TCPG_XENLA	T-complex protein 1 subunit gamma OS=Xenopus laevis GN=cct3 PE=2 SV=2	1.1e-213	2074	sp|Q3T0K2|TCPG_BOVIN	T-complex protein 1 subunit gamma OS=Bos taurus GN=CCT3 PE=1 SV=1	9e-212	2056	sp|P49368|TCPG_HUMAN	T-complex protein 1 subunit gamma OS=Homo sapiens GN=CCT3 PE=1 SV=4		+			+		CTTTTTTTTTGGTTTCAAATCAATTTAATGAAGTGGTATATATTTGTTGCGTACAAAAAGTAAAGTGTATAACTTAGCAATCACACGGGAAGATCTGACAAGTTTATAATTTCACATGAATATCACTTTTGAAAAGTACATTCTGTAAGTATTGTATCGTAGCTCATAGCTCTTGATCCATATGAAAACATAAAGACGTCACTTAGCACAATTTTGCGGCATGCCATTCTGCGTTCGTGTTTGACCACTTGCAAATGTGAAAACATGCACTTAATGGAGAATAAATATCACTGCAGATGTTTGAAGTAATATGGCAGACAATTAACAAATCAATTAATTAAATCACTAACAAGATCTAGTACTACATTTCTGGACCGCCTGCTGGCATGCCTCCTCCAC…	>comp2267718_c0_seq1 CTTTTTTTTTGGTTTCAAATCAATTTAATGAAGTGGTATATATTTGTTGCGTACAAAAAGTAAAGTGTATAACTTAGCAATCACACGGGAAGATCTGACAAGTTTATAATTTCACATGAATATCACTTTTGAAAAGTACATTCTGTAAGTATTGTATCGTAGCTCATAGCTCTTGATCCATATGAAAACATAAAGACGTCACTTAGCACAATTTTGCGGCATGCCATTCTGCGTTCGTGTTTGACCACTTGCAAATGTGAAAACATGCACTTAATGGAGAATAAATATCACTGCAGATGTTTGAAGTAATATGGCAGACAATTAACAAATCAATTAATTAAATCACTAACAAGATCTAGTACTACATTTCTGGACCGC…
comp2274121_c0_seq4	4.3e-88	757	sp|Q9TXQ1|TNKS1_CAEEL	Tankyrase-like protein OS=Caenorhabditis elegans GN=tank-1 PE=2 SV=1	1e-27	276	sp|P16157|ANK1_HUMAN	Ankyrin-1 OS=Homo sapiens GN=ANK1 PE=1 SV=3	1.2e-33	270	sp|Q502K3|ANR52_DANRE	Serine/threonine-protein phosphatase 6 regulatory ankyrin repeat subunit C OS=Danio rerio GN=ankrd52 PE=2 SV=1	+				+		TGCATCACAGACCAGCCATGGTTGTCCACTGCGTCAAATTTGAGATCAGTCCTAACTGGGAGGTCGAAGGCGTCAATGTTTGCAAGCGGATCATCTTCACAAAACTCTGGAGGCTTCTGTTTAAGATATCTGATTCTTTCTCGGCGATCCCTTCCCTTTCTCTTTCTATCACTGAAATGATAACTGGCTGGGTTTGCCACAAGCAGCACTTCGATCATGTGTACGTCATTCATTCGAACGGCATACATCAACGGTGTAACTCCATCATTTGTAGCGAAATTCACCGAGGCGCCATTTTCAAGCAGTTCCTTGGCCACAGATTGATTGCTATTGCAAATGGCGTGAATCAATGGCGAAACTTTTGAGTCATAGCGAACGTAGTATTCATCCACTTGGAGG…	>comp2274121_c0_seq4 TGCATCACAGACCAGCCATGGTTGTCCACTGCGTCAAATTTGAGATCAGTCCTAACTGGGAGGTCGAAGGCGTCAATGTTTGCAAGCGGATCATCTTCACAAAACTCTGGAGGCTTCTGTTTAAGATATCTGATTCTTTCTCGGCGATCCCTTCCCTTTCTCTTTCTATCACTGAAATGATAACTGGCTGGGTTTGCCACAAGCAGCACTTCGATCATGTGTACGTCATTCATTCGAACGGCATACATCAACGGTGTAACTCCATCATTTGTAGCGAAATTCACCGAGGCGCCATTTTCAAGCAGTTCCTTGGCCACAGATTGATTGCTATTGCAAATGGCGTGAATCAATGGCGAAACTTTTGAGTCATAGCGAACG…
comp2276377_c0_seq2	9.1e-116	1150	sp|Q921F2|TADBP_MOUSE	TAR DNA-binding protein 43 OS=Mus musculus GN=Tardbp PE=1 SV=1	2.4e-115	1146	sp|Q5R5W2|TADBP_PONAB	TAR DNA-binding protein 43 OS=Pongo abelii GN=TARDBP PE=2 SV=1	3.1e-115	1145	sp|Q13148|TADBP_HUMAN	TAR DNA-binding protein 43 OS=Homo sapiens GN=TARDBP PE=1 SV=1	+	+			++	Candidate_TAR DNA-binding	TATTGCGATCGCCATTTTGGATGAGAAGTAAATTCGCCACCCCTCCAGAGAAGAAGCGAATAAATAGGTGTGTAGAGGGTGACATTTCGCGTTTCTCTGCCAGAAAATGAATCAGTATATTCAAGTGGCAGAGGATGAAACAGAAGAGCCAATTGAACTACCCATTGAAGAGGATGGGACCCTTATGTTATCCACCCTAGCAGCCCAGTTCCCTGGGGCATGCGGATTGAAATATCGAAATCCAGATACTGGGAATTTTCGAGGAATTCGTCTTGTGGAGGGCAAGCTACACCCATCGGAGGGGCATTGGCAGAACCTCGTGTACACCGCAGTTTTCCCCAAAGGTCAAGAAAACAAAAGGAAAGGCGAAGAAGGAATAGACAACCCATCAGCAAAAAC…	>comp2276377_c0_seq2_Candidate_TAR DNA-binding TATTGCGATCGCCATTTTGGATGAGAAGTAAATTCGCCACCCCTCCAGAGAAGAAGCGAATAAATAGGTGTGTAGAGGGTGACATTTCGCGTTTCTCTGCCAGAAAATGAATCAGTATATTCAAGTGGCAGAGGATGAAACAGAAGAGCCAATTGAACTACCCATTGAAGAGGATGGGACCCTTATGTTATCCACCCTAGCAGCCCAGTTCCCTGGGGCATGCGGATTGAAATATCGAAATCCAGATACTGGGAATTTTCGAGGAATTCGTCTTGTGGAGGGCAAGCTACACCCATCGGAGGGGCATTGGCAGAACCTCGTGTACACCGCAGTTTTCCCCAAAGGTCAAGAA…
comp2264302_c0_seq2	1e-47	274	sp|Q2MV58|TECT1_HUMAN	Tectonic-1 OS=Homo sapiens GN=TCTN1 PE=2 SV=2	1.3e-41	290	sp|Q8BZ64|TECT1_MOUSE	Tectonic-1 OS=Mus musculus GN=Tctn1 PE=1 SV=1	1.5e-37	425	sp|Q9CY58|PAIRB_MOUSE	Plasminogen activator inhibitor 1 RNA-binding protein OS=Mus musculus GN=Serbp1 PE=1 SV=2				+	+		TTTTTTTTTTTTTTTTTTTTTAGACTAAATGGCTTTATTACAACCACCTCACATGATACATGCAACACAACGAAACAAACGGAGCATCGAAAACATCACATTGTGTAGAAATTCAATAGCAGAAAAAAATTTAATACTTTTAATATAATTCTGGTTCTACCAATTTTCACCCACACTTCATGTCAACAAAACACTTTGAAGTATTTGTAAGTATATTTATTACCAACTCAACATTCTGTTAACTGGATTCAATTCTGTGAAAATTAATACCTCTCACCACCAGTCCGGTGTTATTTTTATAATCATGAACAATAGTCGCTCCTTCACTTCGTAAAGGAAGTATTCAAATAATAATGACCTACAAAAAACTTTAAATTAGGATATACAATATATATAAAT…	>comp2264302_c0_seq2 TTTTTTTTTTTTTTTTTTTTTAGACTAAATGGCTTTATTACAACCACCTCACATGATACATGCAACACAACGAAACAAACGGAGCATCGAAAACATCACATTGTGTAGAAATTCAATAGCAGAAAAAAATTTAATACTTTTAATATAATTCTGGTTCTACCAATTTTCACCCACACTTCATGTCAACAAAACACTTTGAAGTATTTGTAAGTATATTTATTACCAACTCAACATTCTGTTAACTGGATTCAATTCTGTGAAAATTAATACCTCTCACCACCAGTCCGGTGTTATTTTTATAATCATGAACAATAGTCGCTCCTTCACTTCGTAAAGGAAGTATTCAAATAATAATGACCTACAAAAAACTTTAAATTA…
comp2275445_c0_seq2	7.5e-89	896	sp|Q91W90|TXND5_MOUSE	Thioredoxin domain-containing protein 5 OS=Mus musculus GN=Txndc5 PE=1 SV=2	3.2e-88	890	sp|Q8NBS9|TXND5_HUMAN	Thioredoxin domain-containing protein 5 OS=Homo sapiens GN=TXNDC5 PE=1 SV=2	7.6e-80	811	sp|Q9VYV3|TXND5_DROME	Thioredoxin domain-containing protein 5 homolog OS=Drosophila melanogaster GN=prtp PE=1 SV=2	+				+		CCATGTATTAAAATGAAGAGCCTTATGTAATACCTAATCATGTGATCTCTGTTTGTACAGATATATGTCATAAATTGCGTAAAACTGCTACGGCACTCGGCAAGAAACAAGATATCAATGTTCTTCGTAAGAAAACAATTGTACATACCCTGGTATTTTAGTCATGGTGAAAGATTGATCGTATTATTAGAAATAAAATTGTTCTTGTGACCATAATATTGCAATGATTGAGTGTACATGGAATTTGATTGAAAAACAACTTCCCAATAATGATATCACTAGCTGTTTGGAATGGACGAAATAGACATTTCATTCTCTGAAAACACAAATGATGGACATAAAACTGTCACCAGTTTAAGTTTCATTATGTCTTTGACATTTCACATCGCACATCCATTC…	>comp2275445_c0_seq2 CCATGTATTAAAATGAAGAGCCTTATGTAATACCTAATCATGTGATCTCTGTTTGTACAGATATATGTCATAAATTGCGTAAAACTGCTACGGCACTCGGCAAGAAACAAGATATCAATGTTCTTCGTAAGAAAACAATTGTACATACCCTGGTATTTTAGTCATGGTGAAAGATTGATCGTATTATTAGAAATAAAATTGTTCTTGTGACCATAATATTGCAATGATTGAGTGTACATGGAATTTGATTGAAAAACAACTTCCCAATAATGATATCACTAGCTGTTTGGAATGGACGAAATAGACATTTCATTCTCTGAAAACACAAATGATGGACATAAAACTGTCACCAGTTTAAGTTTCATTATGTCTTTGACA…
comp2244968_c0_seq1	7.3e-27	311	sp|O14463|TRX1_SCHPO	Thioredoxin-1 OS=Schizosaccharomyces pombe (strain 972 / ATCC 24843) GN=trx1 PE=3 SV=3	4.1e-26	304	sp|Q6XHI1|THIO2_DROYA	Thioredoxin-2 OS=Drosophila yakuba GN=Trx-2 PE=3 SV=1	7.6e-25	292	sp|Q9V429|THIO2_DROME	Thioredoxin-2 OS=Drosophila melanogaster GN=Trx-2 PE=1 SV=2			+		+		CTATTTTTTTGAGTTGTAGCAGGTTTTTAATGGAAAAACAAAAGGGTTATTGTATTAAAGGATAAATTTTGTATCATCATGCAACTGGGTCCACCATCAACATTACATAATTACGGATTAACTCAGTCAAGTGTACTGTACCCTAATATTATTTCATGCCAAACAACAGTGGAAAGAACTTCGGATTGCAGTGTGCATAATTGCATCAGTTATGACAGGTAAAAAAGCGATGTTCTGTAACAAACACTTAGTAAACAATTTTGTAGCAAACCATGATTAGACAGGCAGGAATGTGTGCATGTAAATGCTCCCTAAAAAGTGTTGAGTAGACCAGATCTGTCACGCTTATATATAGCTCTAGTCTAAAAATTTTTACATATTCAAATTTTAAAAATTTTA…	>comp2244968_c0_seq1 CTATTTTTTTGAGTTGTAGCAGGTTTTTAATGGAAAAACAAAAGGGTTATTGTATTAAAGGATAAATTTTGTATCATCATGCAACTGGGTCCACCATCAACATTACATAATTACGGATTAACTCAGTCAAGTGTACTGTACCCTAATATTATTTCATGCCAAACAACAGTGGAAAGAACTTCGGATTGCAGTGTGCATAATTGCATCAGTTATGACAGGTAAAAAAGCGATGTTCTGTAACAAACACTTAGTAAACAATTTTGTAGCAAACCATGATTAGACAGGCAGGAATGTGTGCATGTAAATGCTCCCTAAAAAGTGTTGAGTAGACCAGATCTGTCACGCTTATATATAGCTCTAGTCTAAAAATTTTTACAT…
comp2265703_c0_seq1	8.1e-60	622	sp|Q86V81|THOC4_HUMAN	THO complex subunit 4 OS=Homo sapiens GN=ALYREF PE=1 SV=3	1e-59	621	sp|Q28FB9|THOC4_XENTR	THO complex subunit 4 OS=Xenopus tropicalis GN=alyref PE=2 SV=1	1e-59	621	sp|B5FXN8|THOC4_TAEGU	THO complex subunit 4 OS=Taeniopygia guttata GN=ALYREF PE=2 SV=1			+	+	++		TTTTTAATGTCGTATTTAAAATCGCCTGCGTCATTGCCAGCTCATCCGTTTCCGGCTGACCGCCATTTTCGCCTCAGACGCTTCAGCCACGCTTGCCGGTCACAAAGCATTCAATTCATTTTCAAGATGCCGGCTGGAGAAGAAAAAATCGACCTGTCGCTTGACGACATCATCAAGATGAATAGGAAACCCGGAGGAAGAGGACGAGGTGGCCGGGGAGGCCGTGGGGCGGGCAGGGGAGGTCGAGGAGGACGCGGCGCTGGAAGATCTCCGAGCACAATTCGAGGCGGAGTACAAAAGCGGAATTTGAGAGGTGGAGTTGGCAGGAGACCGGCGGCTTATTCCAGACCCAAGCAACTTCCTGACGTTTGGGAACATGATCTCTTTGACGGCAACACG…	>comp2265703_c0_seq1 TTTTTAATGTCGTATTTAAAATCGCCTGCGTCATTGCCAGCTCATCCGTTTCCGGCTGACCGCCATTTTCGCCTCAGACGCTTCAGCCACGCTTGCCGGTCACAAAGCATTCAATTCATTTTCAAGATGCCGGCTGGAGAAGAAAAAATCGACCTGTCGCTTGACGACATCATCAAGATGAATAGGAAACCCGGAGGAAGAGGACGAGGTGGCCGGGGAGGCCGTGGGGCGGGCAGGGGAGGTCGAGGAGGACGCGGCGCTGGAAGATCTCCGAGCACAATTCGAGGCGGAGTACAAAAGCGGAATTTGAGAGGTGGAGTTGGCAGGAGACCGGCGGCTTATTCCAGACCCAAGCAACTTCCTGACGTTTGGGAACAT…
comp2274246_c0_seq1	5.6e-128	1239	sp|P35443|TSP4_HUMAN	Thrombospondin-4 OS=Homo sapiens GN=THBS4 PE=1 SV=2	5.9e-128	1265	sp|P49746|TSP3_HUMAN	Thrombospondin-3 OS=Homo sapiens GN=THBS3 PE=1 SV=1	2e-127	1260	sp|Q05895|TSP3_MOUSE	Thrombospondin-3 OS=Mus musculus GN=Thbs3 PE=1 SV=2			+		+		CACTGTAGAATCCAACTTAAAATCGTCAGTGCTAGACAGTGACCAGGATGGTATCCCTGACCATTTGGATGATGATGATGATAATGATGGCATTCCTGACATCGAAGAATCTCCTCCACCTCCAGCACCACCAGGAACTGTAGAAGACAGTGATATTGACAAAGACGGTATTCCTTGTTACTTGGACACAGATGATGACAATGATGGTATTCCTGATACTCTGGATGAAGATGCTGATGATAATAGTATTCTTGATAAGTATGAAGATGATGATGATGACGGCATTCTCGACTATTTGGATGAAGACGATGATAATGATGGTATTCCAGACACAGAGGAAGACAGAGATGGAGATGGAATTCCTGATTACTTAGATCCAGATGATGACAATGATGGAAT…	>comp2274246_c0_seq1 CACTGTAGAATCCAACTTAAAATCGTCAGTGCTAGACAGTGACCAGGATGGTATCCCTGACCATTTGGATGATGATGATGATAATGATGGCATTCCTGACATCGAAGAATCTCCTCCACCTCCAGCACCACCAGGAACTGTAGAAGACAGTGATATTGACAAAGACGGTATTCCTTGTTACTTGGACACAGATGATGACAATGATGGTATTCCTGATACTCTGGATGAAGATGCTGATGATAATAGTATTCTTGATAAGTATGAAGATGATGATGATGACGGCATTCTCGACTATTTGGATGAAGACGATGATAATGATGGTATTCCAGACACAGAGGAAGACAGAGATGGAGATGGAATTCCTGATTACTTAGATCC…
comp2277337_c0_seq4	1.7e-26	333	sp|Q9QXE5|TSSP_MOUSE	Thymus-specific serine protease OS=Mus musculus GN=Prss16 PE=2 SV=1	1.7e-26	333	sp|P34528|YM67_CAEEL	Putative serine protease K12H4.7 OS=Caenorhabditis elegans GN=K12H4.7 PE=3 SV=2	1.8e-23	307	sp|Q9NQE7|TSSP_HUMAN	Thymus-specific serine protease OS=Homo sapiens GN=PRSS16 PE=2 SV=2			+		+		TTTTTTTTTTTTTAAATTTTTATACTTTATTTATTGCAAAAAAATACAAATATTCTCAATATATGTTAATCACAGTCCATCTCAAATTCTCAAATCTCGCCAGCGTATGTACATTGCAATAAAATGCCTTTTTCAATGTTACACAAGTGCTCATAAATCATAAACATGAAGCAGATAGATAGAGACAGAAAATCTCAAATTTGACAAAACTCTCAATAATTCTGCAAGTGAGGCAACTTTAAAATTAGCAAAAATTAGGCAAAAAAAAAGAAGCTGTGCAGAGCTAGTTACTCTCAACAGACTAATACTTTCACCCTGGTAGTTGAAACTTAAACTGAAAACTGTGTGCAATGTAACAAGCCTTGTTGCATGCGGATACAATCATGTTAAAATACTGAA…	>comp2277337_c0_seq4 TTTTTTTTTTTTTAAATTTTTATACTTTATTTATTGCAAAAAAATACAAATATTCTCAATATATGTTAATCACAGTCCATCTCAAATTCTCAAATCTCGCCAGCGTATGTACATTGCAATAAAATGCCTTTTTCAATGTTACACAAGTGCTCATAAATCATAAACATGAAGCAGATAGATAGAGACAGAAAATCTCAAATTTGACAAAACTCTCAATAATTCTGCAAGTGAGGCAACTTTAAAATTAGCAAAAATTAGGCAAAAAAAAAGAAGCTGTGCAGAGCTAGTTACTCTCAACAGACTAATACTTTCACCCTGGTAGTTGAAACTTAAACTGAAAACTGTGTGCAATGTAACAAGCCTTGTTGCATGCGGATA…
comp2278509_c0_seq8	1.3e-66	725	sp|G4SLH0|TTN1_CAEEL	Titin homolog OS=Caenorhabditis elegans GN=ttn-1 PE=1 SV=2	1.1e-59	658	sp|Q9QR71|ORF73_HHV8P	Protein ORF73 OS=Human herpesvirus 8 type P (isolate GK18) GN=ORF73 PE=1 SV=1	6.8e-51	619	sp|Q9I7U4|TITIN_DROME	Titin OS=Drosophila melanogaster GN=sls PE=1 SV=3		+			+		AATCTTGAGTATGTGAAGATAGGGTCCTAATTTCTTGACTAGATTCAGTCTGACTGATCAACGTTTGTTGTCCTTCCATAAACATCTGCATCTGTTGTTGCATAGAGACTTCTGTTGTACTCTTTTCAGTCTGTTGATTGTTCATCACTTCCGTATTGCTTCGCATCATTTCCTCTATGTCAGGAGTTGTGACAACTTTAGGTGTAGTTGGTGTTGGTAAACTTCCAAGGCTGATTGTATCATAATCTGCTGGTTTACCCAATGAAGTAGAATCAAATTCTGTATCAACCACATCCTTTTTCTGGGTTTCTGCCACTTGTTCTTGAGCCTCTGATACTATTATATCAGCCATGCCACCTGCTAAGTCTGCTTGCATTGTTGACACTTGAGTAACAGAAG…	>comp2278509_c0_seq8 AATCTTGAGTATGTGAAGATAGGGTCCTAATTTCTTGACTAGATTCAGTCTGACTGATCAACGTTTGTTGTCCTTCCATAAACATCTGCATCTGTTGTTGCATAGAGACTTCTGTTGTACTCTTTTCAGTCTGTTGATTGTTCATCACTTCCGTATTGCTTCGCATCATTTCCTCTATGTCAGGAGTTGTGACAACTTTAGGTGTAGTTGGTGTTGGTAAACTTCCAAGGCTGATTGTATCATAATCTGCTGGTTTACCCAATGAAGTAGAATCAAATTCTGTATCAACCACATCCTTTTTCTGGGTTTCTGCCACTTGTTCTTGAGCCTCTGATACTATTATATCAGCCATGCCACCTGCTAAGTCTGCTTGCATTG…
comp2254470_c0_seq1	8.5e-62	541	sp|Q9I7U4|TITIN_DROME	Titin OS=Drosophila melanogaster GN=sls PE=1 SV=3	4.5e-54	561	sp|Q8WZ42|TITIN_HUMAN	Titin OS=Homo sapiens GN=TTN PE=1 SV=4	2e-53	555	sp|A2ASS6|TITIN_MOUSE	Titin OS=Mus musculus GN=Ttn PE=1 SV=1				+	+		CAGGTGGCGCCTGTGGCTGGGATAGGTTGACCTTGAGGTGAGCAATGCAGGTCACTTCCCCAGCGGGGTTCCTGGCTACGCATTTGTAGACGCCGTCATCTTCGGGGAACGCCCCAGCGATGACGAGGGAGTGTCGTGTTCCGTCGGAACTCATCTGGAAGTACTTGCTCGGCTTGATGAGCTTGTCGTTGCAGTACCACTGGATCACTGGCTCGGGGGAGGCTGTGATGTTGCACACAAACTCCGCACAGAATCCTTCGTCAACAGTCTGGTCGAACAAGGTCTGTACGAGCTGGGGAGCGCTAGATGGCGCTACCATATCCGCTGGGGTGGCGTCCATGACGTCTCCCTCGACTACAAGAGTAGCTGAGCACGTGGCTCGTCCTATTTTGTTGGTTA…	>comp2254470_c0_seq1 CAGGTGGCGCCTGTGGCTGGGATAGGTTGACCTTGAGGTGAGCAATGCAGGTCACTTCCCCAGCGGGGTTCCTGGCTACGCATTTGTAGACGCCGTCATCTTCGGGGAACGCCCCAGCGATGACGAGGGAGTGTCGTGTTCCGTCGGAACTCATCTGGAAGTACTTGCTCGGCTTGATGAGCTTGTCGTTGCAGTACCACTGGATCACTGGCTCGGGGGAGGCTGTGATGTTGCACACAAACTCCGCACAGAATCCTTCGTCAACAGTCTGGTCGAACAAGGTCTGTACGAGCTGGGGAGCGCTAGATGGCGCTACCATATCCGCTGGGGTGGCGTCCATGACGTCTCCCTCGACTACAAGAGTAGCTGAGCACGTGG…
comp2275357_c0_seq19	1e-111	968	sp|Q68FJ8|TM1L2_XENLA	TOM1-like protein 2 OS=Xenopus laevis GN=tom1l2 PE=2 SV=1	4.4e-111	957	sp|Q5SRX1|TM1L2_MOUSE	TOM1-like protein 2 OS=Mus musculus GN=Tom1l2 PE=1 SV=1	6.4e-110	961	sp|Q6ZVM7|TM1L2_HUMAN	TOM1-like protein 2 OS=Homo sapiens GN=TOM1L2 PE=1 SV=1		+			+		ACATCATTATATCACAACCAAATTGCAAAAATTGCATTAAAGCATTTAAATTAGGGTTCCCACAAATCTACAAATCCGAATTTCATGACTTTTCTGCCTTTTTATTGTTTCGATAACATCAAGGTCAAAATTATAACTTTCAATTTTTTTCCAGGACAAAAAAAATTAAATAACTTCCATGGCAGAATTAAGAGACCAAATTTTGACAATCGGGAATTTGTGAATTTTTTAGTAAAGCATTCGACAACATCCGCGTGACAAATGCAATAACTTTTCTGTAATTTTCGCTTTCATGATTTTCAAGGAACTTTTGATCTCACATGCTTTTACAGATTGGCAAACTCGTAAATGTGGGAACCCTGCGATTTTACAATGAACTAAAACCAGTCGATCGGGGAC…	>comp2275357_c0_seq19 ACATCATTATATCACAACCAAATTGCAAAAATTGCATTAAAGCATTTAAATTAGGGTTCCCACAAATCTACAAATCCGAATTTCATGACTTTTCTGCCTTTTTATTGTTTCGATAACATCAAGGTCAAAATTATAACTTTCAATTTTTTTCCAGGACAAAAAAAATTAAATAACTTCCATGGCAGAATTAAGAGACCAAATTTTGACAATCGGGAATTTGTGAATTTTTTAGTAAAGCATTCGACAACATCCGCGTGACAAATGCAATAACTTTTCTGTAATTTTCGCTTTCATGATTTTCAAGGAACTTTTGATCTCACATGCTTTTACAGATTGGCAAACTCGTAAATGTGGGAACCCTGCGATTTTACAATGAA…
comp2269738_c0_seq1	0.67	104	sp|B4M5T7|FOSL_DROVI	Transcription factor kayak OS=Drosophila virilis GN=kay PE=3 SV=1	0.996	96	sp|Q49WF1|HTRAL_STAS1	Serine protease HtrA-like OS=Staphylococcus saprophyticus subsp. saprophyticus (strain ATCC 15305 / DSM 20229) GN=SSP1763 PE=3 SV=1							+		+		CTTTTGAAGCATTTATTCAACTCAGTATGTACAGTGTCATTAAATAGAAGTTATTTCAATTATACACTTGTAAGCCTTAACATGAGCTTATACATGGCATTCTACACATTGGTCTGTCAGTGATATGTATAAGTGTTTTGGTGGTTAATGCAATACTGAAATTATAACAAAGGTTATTCACCCGTTCATACTTTTATGCATGTATACAGTTAAGTAAATTGAAGTCCAGAGGATGCAGAAGTTAACCACTGCAAAATAAATCTTGAACCTTGTCGAAGTCTCTCTGCTTATCATTTTTTGTTGAACATTTGCATTTTGATCTTTCACACCTCCATGCTTCGTGAACAACCATATCAGAGGTTTTGTTCTTTCAAAATGTTAATTTGTCCTCTCCACCCT…	>comp2269738_c0_seq1 CTTTTGAAGCATTTATTCAACTCAGTATGTACAGTGTCATTAAATAGAAGTTATTTCAATTATACACTTGTAAGCCTTAACATGAGCTTATACATGGCATTCTACACATTGGTCTGTCAGTGATATGTATAAGTGTTTTGGTGGTTAATGCAATACTGAAATTATAACAAAGGTTATTCACCCGTTCATACTTTTATGCATGTATACAGTTAAGTAAATTGAAGTCCAGAGGATGCAGAAGTTAACCACTGCAAAATAAATCTTGAACCTTGTCGAAGTCTCTCTGCTTATCATTTTTTGTTGAACATTTGCATTTTGATCTTTCACACCTCCATGCTTCGTGAACAACCATATCAGAGGTTTTGTTCTTTCAAAATG…
comp2237468_c0_seq1	3e-10	175	sp|Q01042|ICP22_SHV21	Transcriptional regulator ICP22 homolog OS=Saimiriine herpesvirus 2 (strain 11) GN=73 PE=3 SV=1	2.3e-08	159	sp|Q75JC9|Y8484_DICDI	Uncharacterized protein DDB_G0271670 OS=Dictyostelium discoideum GN=DDB_G0271670 PE=3 SV=1	1.2e-07	157	sp|P13816|GARP_PLAFF	Glutamic acid-rich protein OS=Plasmodium falciparum (isolate FC27 / Papua New Guinea) GN=GARP PE=4 SV=1				+	+		TTGCGGTCAGCGGGAGTCACGTGCCCTTAGAATACTTATAGAAGAGCGAGGCGGGAACTTGTCATTCGTCTGCTTTGTTGTGTGAGAATCTGTGGCACATTGCCTGGAAATACTATCCCTAAAAGAATAAAAATGGCTGAGGTTGAACAAAACGTCCAAGTTGAGAAGGAGGAGCAGGAGACTCCCGCAGAAAAAGTAGAGAAGGAGGAAGCTGAGGAGGCCGAAAACGCAGAAGCCGAATCAACGGAAGACAAAGAAGAAGACAATGATGATTCATCAGAAGAAAAAGATGATGAGGAAGGAGAGGAGGAGGAAAAGACTGATGGTGCTCCTGTTGCAGTTGTATCGCCCCAGAAGCGAGTAGCAGAAGAGGCCGCCAAAGACGAAGATGAATCGCCG…	>comp2237468_c0_seq1 TTGCGGTCAGCGGGAGTCACGTGCCCTTAGAATACTTATAGAAGAGCGAGGCGGGAACTTGTCATTCGTCTGCTTTGTTGTGTGAGAATCTGTGGCACATTGCCTGGAAATACTATCCCTAAAAGAATAAAAATGGCTGAGGTTGAACAAAACGTCCAAGTTGAGAAGGAGGAGCAGGAGACTCCCGCAGAAAAAGTAGAGAAGGAGGAAGCTGAGGAGGCCGAAAACGCAGAAGCCGAATCAACGGAAGACAAAGAAGAAGACAATGATGATTCATCAGAAGAAAAAGATGATGAGGAAGGAGAGGAGGAGGAAAAGACTGATGGTGCTCCTGTTGCAGTTGTATCGCCCCAGAAGCGAGTAGCAGAAGAGGCCGCC…
comp2275833_c0_seq1	3.8e-165	1616	sp|Q91YJ5|IF2M_MOUSE	Translation initiation factor IF-2, mitochondrial OS=Mus musculus GN=Mtif2 PE=1 SV=2	8.1e-163	1594	sp|P46198|IF2M_BOVIN	Translation initiation factor IF-2, mitochondrial OS=Bos taurus GN=MTIF2 PE=1 SV=1	2.2e-162	1590	sp|P46199|IF2M_HUMAN	Translation initiation factor IF-2, mitochondrial OS=Homo sapiens GN=MTIF2 PE=1 SV=2		+	+		++	Candidate_Translation initiation factor IF2	CTGAGTTTTTCACAGTGCTGGAGCATTGCATTGCATTCCACAATAACAGCGTTCTGACATTTTACCCAGTTACAACTTGTCAGCTACAAGTTATTGGCAGTTTGTCCAGAGCTCTCATAACTTGATGCGAGCATCACCAGGATGCCTCTAGACCACCGAAGAAAGCCGGACTCGTCAATAGAGAAGATCATGCTCCGATACAAGGTCATTCCCTACGAGGAAGATGATGACGAAGAGATTCCCACAATGACCTTCAGGGCAGGACCCATGTACTCAAGGTCATACACAAGGTCATACAGTCCGGACACAAGGTCATATAATACAGATACGAGGTCCTTCAGTTCAGAAACGCGGTCATACAGTCCGGTGACTATCACAAACGGCACAGCTCCAAGGATC…	>comp2275833_c0_seq1_Candidate_Translation initiation factor IF2 CTGAGTTTTTCACAGTGCTGGAGCATTGCATTGCATTCCACAATAACAGCGTTCTGACATTTTACCCAGTTACAACTTGTCAGCTACAAGTTATTGGCAGTTTGTCCAGAGCTCTCATAACTTGATGCGAGCATCACCAGGATGCCTCTAGACCACCGAAGAAAGCCGGACTCGTCAATAGAGAAGATCATGCTCCGATACAAGGTCATTCCCTACGAGGAAGATGATGACGAAGAGATTCCCACAATGACCTTCAGGGCAGGACCCATGTACTCAAGGTCATACACAAGGTCATACAGTCCGGACACAAGGTCATATAATACAGATACGAGGT…
comp2141229_c0_seq1	2e-40	439	sp|Q75VN3|TCTP_BOMMO	Translationally-controlled tumor protein homolog OS=Bombyx mori GN=Tctp PE=2 SV=1	1.3e-38	422	sp|Q6XIN1|TCTP_DROYA	Translationally-controlled tumor protein homolog OS=Drosophila yakuba GN=Tctp PE=2 SV=1	5.5e-38	416	sp|Q9VGS2|TCTP_DROME	Translationally-controlled tumor protein homolog OS=Drosophila melanogaster GN=Tctp PE=1 SV=1			+		+		TTTTTTTTTTTTTTTTTTTTGAGTGCCACAGGTATTTATTATTGAACCGATTCTTAAGCCATAGTTAGGCACAGTTAGTGGAAATTAAAAAATATTTTCCATTACAAAAACGAAGCCAACAATGACTAGGCGCATGAAGGAATGGCATTATGTTAACTGTCTAAAACAATGCTTATGCACCGTATTGGATAATTGTCAATAAATAAGCCTTAAGAACAAATTAAATGCCAAAGTTTGTTTTTGGAGATTTGTCGTCATTGATGATATTGAAATGCATGCAAAGAATGGTTGATGATTCATGAGAAAATGATTGCCTAATGATCCGCTTTGTTCAAACTTTCTCCTCGTCTAATCCATCTTTGAAAAAGTAGAATATGGGGACCTCGTTGCCGTCTGCGC…	>comp2141229_c0_seq1 TTTTTTTTTTTTTTTTTTTTGAGTGCCACAGGTATTTATTATTGAACCGATTCTTAAGCCATAGTTAGGCACAGTTAGTGGAAATTAAAAAATATTTTCCATTACAAAAACGAAGCCAACAATGACTAGGCGCATGAAGGAATGGCATTATGTTAACTGTCTAAAACAATGCTTATGCACCGTATTGGATAATTGTCAATAAATAAGCCTTAAGAACAAATTAAATGCCAAAGTTTGTTTTTGGAGATTTGTCGTCATTGATGATATTGAAATGCATGCAAAGAATGGTTGATGATTCATGAGAAAATGATTGCCTAATGATCCGCTTTGTTCAAACTTTCTCCTCGTCTAATCCATCTTTGAAAAAGTAGAATATGG…
comp2273813_c0_seq2	3.4e-70	720	sp|P16967|SSRA_CANLF	Translocon-associated protein subunit alpha OS=Canis lupus familiaris GN=SSR1 PE=1 SV=1	4.3e-70	719	sp|Q9CY50|SSRA_MOUSE	Translocon-associated protein subunit alpha OS=Mus musculus GN=Ssr1 PE=1 SV=1	1.1e-69	715	sp|A6QLP7|SSRA_BOVIN	Translocon-associated protein subunit alpha OS=Bos taurus GN=SSR1 PE=2 SV=1		+			+	Group_Translocon-associated protein	TTTTTTTTTTTTTTTTAAGTTTCACAACTTTATTTTCAACAAATGTTGCACATCAGACCAATGTCTGCCATGCAATACTGATCGAGGAGGTTTTCATTACTTAGCACAATGAAGACCATGCGCAACAAAGACAAAGTATCAATTTTCATTTTAAACAGTCTTTGCATCCTCAAATTAACTTTCATTCCACATTTCAATCATCTTCACAAGCAGATATAGCCGAGCAAAGGGGCACAGTTATTCATCAAATTACTAAAAACTTTTAACAATGAAATCTTATAGTTTCATTAAATACAGTGCATCACACACTCAAGTCTTCCACGGAACCGACTAAATAATTTTTAAGTTGTGCATGTACAAAATGAGCCAATTCAATCATTCATTGTACTCACAGTACCT…	>comp2273813_c0_seq2_Group_Translocon-associated protein TTTTTTTTTTTTTTTTAAGTTTCACAACTTTATTTTCAACAAATGTTGCACATCAGACCAATGTCTGCCATGCAATACTGATCGAGGAGGTTTTCATTACTTAGCACAATGAAGACCATGCGCAACAAAGACAAAGTATCAATTTTCATTTTAAACAGTCTTTGCATCCTCAAATTAACTTTCATTCCACATTTCAATCATCTTCACAAGCAGATATAGCCGAGCAAAGGGGCACAGTTATTCATCAAATTACTAAAAACTTTTAACAATGAAATCTTATAGTTTCATTAAATACAGTGCATCACACACTCAAGTCTTCCACGGAACCGACTAAATAATTTT…
comp2262197_c0_seq1	2.2e-57	599	sp|Q9CPW5|SSRB_MOUSE	Translocon-associated protein subunit beta OS=Mus musculus GN=Ssr2 PE=1 SV=1	5.9e-57	595	sp|Q5E9E4|SSRB_BOVIN	Translocon-associated protein subunit beta OS=Bos taurus GN=SSR2 PE=2 SV=1	9.6e-57	593	sp|P23438|SSRB_CANLF	Translocon-associated protein subunit beta OS=Canis lupus familiaris GN=SSR2 PE=1 SV=1			+	+	++	Group_Translocon-associated protein	TTTTTTTTTTTTTTTTTTTTTCCCTTTTTTTTTTTTTTTTTTAAAATTAATGGATTTTTATTAAAGACGAATGATTTGAGTGCATGATGTTTCAATCCTTCAATCCACTAGTGCTTATTACATTGACAGCGCACATTAACGTCACTCTCAATAAATATGTACATCCATACATTTCACAGATTTTTTGCATCTTCAGGTTGATTGATCCCTAATTGCTTAGGATTAACAATATGACAATTAAAATAATATTACATTATAAATTGCACAGACCAGTGACACTATACGAGCAACTTGCAACTTTTACACATGAACACTTCAATTTGACAAAATATGTATTTACATCACGCACTCAATTGTATGATATAACCCTTCCTTACAAACTCATTTGAATTTTCTTGC…	>comp2262197_c0_seq1_Group_Translocon-associated protein TTTTTTTTTTTTTTTTTTTTTCCCTTTTTTTTTTTTTTTTTTAAAATTAATGGATTTTTATTAAAGACGAATGATTTGAGTGCATGATGTTTCAATCCTTCAATCCACTAGTGCTTATTACATTGACAGCGCACATTAACGTCACTCTCAATAAATATGTACATCCATACATTTCACAGATTTTTTGCATCTTCAGGTTGATTGATCCCTAATTGCTTAGGATTAACAATATGACAATTAAAATAATATTACATTATAAATTGCACAGACCAGTGACACTATACGAGCAACTTGCAACTTTTACACATGAACACTTCAATTTGACAAAATATGTATTTACAT…
comp2266701_c0_seq3	1.1e-103	934	sp|Q9GZ71|TPM_HALDV	Tropomyosin OS=Haliotis diversicolor PE=2 SV=1	2.8e-103	938	sp|P43689|TPM2_BIOGL	Tropomyosin-2 OS=Biomphalaria glabrata PE=2 SV=1	4.2e-100	913	sp|O97192|TPM_HELAS	Tropomyosin OS=Helix aspersa PE=1 SV=1		+			+		GGCCTATTGCTAAATGGCTGATAGATTTGTAACTGATACCGATAGGTCTATTGTTATAAACTTTTCAAAATGTTGCAAAAATGAAACTTTTATCAATTGAAACCCTTAGCTGCTTTCTTAATGTTTGTAATTGTGTTCAGAAGGTTATAGTGACTTGTGATATTGGCCTAGCTGTTGCTATAGATAGACTGTAGTGACTATAGACTGTTTTCTGTTTATCTGTCTCACACCCATTCATCCGGAAATAAAACTTATGATCTAAATTATGAATGCACTGTAAAGATAGTAAGGGCATTTGATATTGAGATCACTGACAATAATTAGGTAATGTAAGTTGATTGGTAGTTTTGGAGGAGTGTTGCATTGATGCATGCATGCAGTAGCTAGCCCAAGGAGCAA…	>comp2266701_c0_seq3 GGCCTATTGCTAAATGGCTGATAGATTTGTAACTGATACCGATAGGTCTATTGTTATAAACTTTTCAAAATGTTGCAAAAATGAAACTTTTATCAATTGAAACCCTTAGCTGCTTTCTTAATGTTTGTAATTGTGTTCAGAAGGTTATAGTGACTTGTGATATTGGCCTAGCTGTTGCTATAGATAGACTGTAGTGACTATAGACTGTTTTCTGTTTATCTGTCTCACACCCATTCATCCGGAAATAAAACTTATGATCTAAATTATGAATGCACTGTAAAGATAGTAAGGGCATTTGATATTGAGATCACTGACAATAATTAGGTAATGTAAGTTGATTGGTAGTTTTGGAGGAGTGTTGCATTGATGCATGCATGC…
comp2251594_c0_seq1	7.2e-20	245	sp|P81660|TNNC2_ANGAN	Troponin C, skeletal muscle OS=Anguilla anguilla PE=1 SV=1	9.3e-20	244	sp|P04352|CALM_CHLRE	Calmodulin OS=Chlamydomonas reinhardtii PE=1 SV=2	1.5e-19	242	sp|O97341|CALM_SUBDO	Calmodulin OS=Suberites domuncula PE=2 SV=3		+			+		TCACTGTTCCACAAGTGTTTAGATCGCGTCACAATTTGTTTCCAGTTTAGATAAACAACAGCATTTGCCGGGGGCCCAGGAAAATCATTTAGAAAATTTCGGAGTTGCAAAGATGTGTTCTCGGCGAGAACTGGAAACATTTTTTGATGATGCTGATACGGATGAAACCGGATATCTTTCGCAAAGCGAGTTGGGAAATGTCTTGAAAAAGTTTGGCTATAACCTAACTGATGCTCAGCTTGAGAAACTTTTCAAATCCATCGATACGTCGGGCGACAAGAGAATTTCAAGAAGAGAATTTGTCGCGGCAATGAATCAAGAAGTTGACAAAGGAGACCATGAAGTGGCTACCATTCGTCGTACCTTCCGATCATTTGACAGAAATGGTAACGGCCTGAT…	>comp2251594_c0_seq1 TCACTGTTCCACAAGTGTTTAGATCGCGTCACAATTTGTTTCCAGTTTAGATAAACAACAGCATTTGCCGGGGGCCCAGGAAAATCATTTAGAAAATTTCGGAGTTGCAAAGATGTGTTCTCGGCGAGAACTGGAAACATTTTTTGATGATGCTGATACGGATGAAACCGGATATCTTTCGCAAAGCGAGTTGGGAAATGTCTTGAAAAAGTTTGGCTATAACCTAACTGATGCTCAGCTTGAGAAACTTTTCAAATCCATCGATACGTCGGGCGACAAGAGAATTTCAAGAAGAGAATTTGTCGCGGCAATGAATCAAGAAGTTGACAAAGGAGACCATGAAGTGGCTACCATTCGTCGTACCTTCCGATCATTTGA…
comp2253516_c0_seq4	1.5e-37	412	sp|P19351|TNNT_DROME	Troponin T, skeletal muscle OS=Drosophila melanogaster GN=up PE=1 SV=3	1.7e-36	402	sp|Q9XZ71|TNNT_PERAM	Troponin T OS=Periplaneta americana GN=TNT PE=2 SV=1	2.2e-30	348	sp|Q27371|TNNT_CAEEL	Troponin T OS=Caenorhabditis elegans GN=mup-2 PE=2 SV=1		+			+		TTTTTTTTTTTTTTTTCAGTTTTAAAAATCCAAGCAAGTTTTATTTGCGGGAACTCGAGATAGCTACAGAGGTTGAAATTGCCCCATAGTTGATAAACAGAAGAGTTTAAAATTAAAATTTGGAGATGAACTGCTAGATTCAATTACAAATGACTGAAAAACTGTCTACCCTTTGCCAGGCCCACTGTTTACACGTATGAGAGCAAGGCTGTTAGTGTGAAGTGTATTCATAGAGCTCCGTAACTGGATAATTATAAAAAAATACATAAAACGTAACAATCACAAGACAAAACAGTATACATATGATTTCCTTAAGTGTACATCAGTCGGTGTCTTACATGAAGTAAACATCAGAAAACCATGCTTTGTAGTTGATTCAGATATTTTACAAGAAATTCG…	>comp2253516_c0_seq4 TTTTTTTTTTTTTTTTCAGTTTTAAAAATCCAAGCAAGTTTTATTTGCGGGAACTCGAGATAGCTACAGAGGTTGAAATTGCCCCATAGTTGATAAACAGAAGAGTTTAAAATTAAAATTTGGAGATGAACTGCTAGATTCAATTACAAATGACTGAAAAACTGTCTACCCTTTGCCAGGCCCACTGTTTACACGTATGAGAGCAAGGCTGTTAGTGTGAAGTGTATTCATAGAGCTCCGTAACTGGATAATTATAAAAAAATACATAAAACGTAACAATCACAAGACAAAACAGTATACATATGATTTCCTTAAGTGTACATCAGTCGGTGTCTTACATGAAGTAAACATCAGAAAACCATGCTTTGTAGTTGATTC…
tuba	5.3e-246	2379	sp|P68362|TBA1A_CRIGR	Tubulin alpha-1A chain OS=Cricetulus griseus GN=TUBA1A PE=2 SV=1	5.3e-246	2379	sp|Q71U36|TBA1A_HUMAN	Tubulin alpha-1A chain OS=Homo sapiens GN=TUBA1A PE=1 SV=1	5.3e-246	2379	sp|P68369|TBA1A_MOUSE	Tubulin alpha-1A chain OS=Mus musculus GN=Tuba1a PE=1 SV=1			+	+	++		ATTGACTACCCATTGCTCCAGTCGTGAGAACTTCACACAGTTCACCACCTAACTTCAACCATGCGCGAATGTATCAGCATCCACGTCGGACAGGCCGGAGTGCAGATCGGCAATGCCTGTTGGGAACTGTATTGCCTTGAGCATGGAATTCAGCCTGATGGCCAGATGCCCAGCGACAAGACCATTGGGGGAGGAGATGACAGCTTCAACACTTTCTTCTCTGAGACAGGAGCTGGAAAACACGTCCCCAGAGCTGTCTTTGTTGACCTAGAACCAACTGTTGTCGATGAGGTCCGAACTGGCACCTACCGACAGCTCTTCCACCCTGAACAACTCATCACTGGCAAAGAGGATGCTGCAAACAACTATGCTAGAGGGCACTACACCATTGGCAAGGAG…	>tuba ATTGACTACCCATTGCTCCAGTCGTGAGAACTTCACACAGTTCACCACCTAACTTCAACCATGCGCGAATGTATCAGCATCCACGTCGGACAGGCCGGAGTGCAGATCGGCAATGCCTGTTGGGAACTGTATTGCCTTGAGCATGGAATTCAGCCTGATGGCCAGATGCCCAGCGACAAGACCATTGGGGGAGGAGATGACAGCTTCAACACTTTCTTCTCTGAGACAGGAGCTGGAAAACACGTCCCCAGAGCTGTCTTTGTTGACCTAGAACCAACTGTTGTCGATGAGGTCCGAACTGGCACCTACCGACAGCTCTTCCACCCTGAACAACTCATCACTGGCAAAGAGGATGCTGCAAACAACTATGCTAGAGGGCACTACACCATTGGC…
comp2257939_c0_seq1	1.2e-38	434	sp|P59282|TPPP2_HUMAN	Tubulin polymerization-promoting protein family member 2 OS=Homo sapiens GN=TPPP2 PE=1 SV=2	8.3e-38	426	sp|Q4R3A0|TPPP2_MACFA	Tubulin polymerization-promoting protein family member 2 OS=Macaca fascicularis GN=TPPP2 PE=2 SV=1	4.7e-37	419	sp|Q9CRB6|TPPP3_MOUSE	Tubulin polymerization-promoting protein family member 3 OS=Mus musculus GN=Tppp3 PE=1 SV=1		+			+		CTGATGCATAATAAGGTTGACAATCTAGTGAGCATCAGAGCACATCTGGCTACCCTGAAATAAGAAACAGGTATGGAGGAAATCTTCAAATCCTTCTGCGCCTTCGGGTCCGGCGGCAAAGGGGCTGCCCCAATGATGGACGGGTCCAAGTTCGCTAAACTTTGTCGAGACTGTAATGTGTTGGACAAGAAAGTCACCACGACAGATGTGGACATCATCTTCAGCAAGGTCAAGGCCAAGACTGAGAGAAAGATCACCTACAAGCAATTCCGTGAAGCCTTGAAACTTCTTGCTGAGAAGAAATACCCGGGTGATGAAGATGCCGTCAAAAAATTGGAAGAAGTCATAATCTCAGCAAAGGGCCCTGCAGTCCATGGTGCTACGAAAGTGCTCAAGTCT…	>comp2257939_c0_seq1 CTGATGCATAATAAGGTTGACAATCTAGTGAGCATCAGAGCACATCTGGCTACCCTGAAATAAGAAACAGGTATGGAGGAAATCTTCAAATCCTTCTGCGCCTTCGGGTCCGGCGGCAAAGGGGCTGCCCCAATGATGGACGGGTCCAAGTTCGCTAAACTTTGTCGAGACTGTAATGTGTTGGACAAGAAAGTCACCACGACAGATGTGGACATCATCTTCAGCAAGGTCAAGGCCAAGACTGAGAGAAAGATCACCTACAAGCAATTCCGTGAAGCCTTGAAACTTCTTGCTGAGAAGAAATACCCGGGTGATGAAGATGCCGTCAAAAAATTGGAAGAAGTCATAATCTCAGCAAAGGGCCCTGCAGTCCATGGT…
comp2268115_c0_seq2	2.8e-27	321	sp|Q0P5Y3|TPPP2_MOUSE	Tubulin polymerization-promoting protein family member 2 OS=Mus musculus GN=Tppp2 PE=2 SV=1	9.8e-27	316	sp|Q3T077|TPPP2_BOVIN	Tubulin polymerization-promoting protein family member 2 OS=Bos taurus GN=TPPP2 PE=2 SV=1	1.6e-25	305	sp|P59282|TPPP2_HUMAN	Tubulin polymerization-promoting protein family member 2 OS=Homo sapiens GN=TPPP2 PE=1 SV=2		+			+		TGTGTTTTTTTTTTTTTTTTTTTCAGTGCATATATTTATTTGATGAAACATGCAAGTAAAACAGCGACAAAAATGTCAAAATATAGCAGATACAAACATAGTCATTGTAACATTGACAACTATGTTGCTGAAAATCACAAACATCTTGAATCACAATTGCAGCATAAGTGCACAGTGTGGTATATAGCTTAAACAAAAAGAAGCAAATATTAAAATATTAATAAATATAATATACTATACATATCTCGCAATGATTCACAAATAAAAATAAACGTTTAATATAAATGAATATATCACACTTTTTACCCTTTATCTTTGAAATAGTTACTCTCATATAAGTACAAATGAGAAGTATGTATAGAAAATGTGGTATAGTTGTAATTTTCTTCTTTTTTTAAA…	>comp2268115_c0_seq2 TGTGTTTTTTTTTTTTTTTTTTTCAGTGCATATATTTATTTGATGAAACATGCAAGTAAAACAGCGACAAAAATGTCAAAATATAGCAGATACAAACATAGTCATTGTAACATTGACAACTATGTTGCTGAAAATCACAAACATCTTGAATCACAATTGCAGCATAAGTGCACAGTGTGGTATATAGCTTAAACAAAAAGAAGCAAATATTAAAATATTAATAAATATAATATACTATACATATCTCGCAATGATTCACAAATAAAAATAAACGTTTAATATAAATGAATATATCACACTTTTTACCCTTTATCTTTGAAATAGTTACTCTCATATAAGTACAAATGAGAAGTATGTATAGAAAATGTGGTATAGTTG…
comp2274295_c0_seq2	3.9e-37	410	sp|Q23551|UNC22_CAEEL	Twitchin OS=Caenorhabditis elegans GN=unc-22 PE=1 SV=3	4.1e-33	401	sp|Q18066|DIM_CAEEL	Disorganized muscle protein 1 OS=Caenorhabditis elegans GN=dim-1 PE=1 SV=3	1.8e-29	376	sp|Q9VN14|CONT_DROME	Contactin OS=Drosophila melanogaster GN=Cont PE=1 SV=2		+			+		GGGTACCTCGGCTTCTCCCTGGCCCTGATCTTCTGGAGCAGCACATTTTGTTTAGATCTGGGTTTAGTTGGAGGACGAGCCTATAGTCTTCAGACACTGTAGCTGTTAGTTAGTGGACGTACATCGCAATGGCGGGTGCCACAGCACCTAAATTCACTCAGAAGCCCTCCCTCAAGCAAGATGGCGGCAACATCGTCTTCTCCTGCGAGATCGAGGCTGAGCCGAAGCCCGAGGTCACCTGGTTTCACGGTGACAAACCATTGGCCGAGAGTGATAGACTCGTCAAGTCTGTCACCCAAATCGATGGAACGAAAAAATACTCTCTTATCCTGACTGTCAAGAATCCCGCAGCCTCTGACTCTGGAACCTACAAAGTAGAGGCTAAAAATAAACTGGGTC…	>comp2274295_c0_seq2 GGGTACCTCGGCTTCTCCCTGGCCCTGATCTTCTGGAGCAGCACATTTTGTTTAGATCTGGGTTTAGTTGGAGGACGAGCCTATAGTCTTCAGACACTGTAGCTGTTAGTTAGTGGACGTACATCGCAATGGCGGGTGCCACAGCACCTAAATTCACTCAGAAGCCCTCCCTCAAGCAAGATGGCGGCAACATCGTCTTCTCCTGCGAGATCGAGGCTGAGCCGAAGCCCGAGGTCACCTGGTTTCACGGTGACAAACCATTGGCCGAGAGTGATAGACTCGTCAAGTCTGTCACCCAAATCGATGGAACGAAAAAATACTCTCTTATCCTGACTGTCAAGAATCCCGCAGCCTCTGACTCTGGAACCTACAAAGTAG…
comp2268225_c0_seq5	1.4e-36	411	sp|Q8VIK1|SNR25_MOUSE	U11/U12 small nuclear ribonucleoprotein 25 kDa protein OS=Mus musculus GN=Snrnp25 PE=1 SV=1	3.9e-36	407	sp|Q3ZBQ4|SNR25_BOVIN	U11/U12 small nuclear ribonucleoprotein 25 kDa protein OS=Bos taurus GN=SNRNP25 PE=2 SV=2	5e-36	406	sp|Q9BV90|SNR25_HUMAN	U11/U12 small nuclear ribonucleoprotein 25 kDa protein OS=Homo sapiens GN=SNRNP25 PE=1 SV=1			+		+		TACGATTTTTTTTTTTCATATGAAACTCAAGATATTTATTAAAAATTACAAAAAAAGACCCAGGTTGTTCACTCATTAGTAATATCCACCTGTGAACACAATTCCCAAGAAATACAAAAAATAACCATATTGACAATTGGCATAGATTGATTAAACTTCAATATAAATGCTAGTGCTGTCTACTTCAAATTATTTTTTTCCCATTAAGTGCCTACTTAAAATAGTGTAGTGAACTACACATAATATAGCTAAAATAGTGCAGTGAACTTCACATATAATTTTAAAAATCTTCACAGCAATTGCCTACTTAAATCACTTGAAAATTGATGAAAGTAATTACTAATAAAGACAATAGTCAATAAAAAGTAGTATTTTCATCAACTTTGATCAATGGTATTC…	>comp2268225_c0_seq5 TACGATTTTTTTTTTTCATATGAAACTCAAGATATTTATTAAAAATTACAAAAAAAGACCCAGGTTGTTCACTCATTAGTAATATCCACCTGTGAACACAATTCCCAAGAAATACAAAAAATAACCATATTGACAATTGGCATAGATTGATTAAACTTCAATATAAATGCTAGTGCTGTCTACTTCAAATTATTTTTTTCCCATTAAGTGCCTACTTAAAATAGTGTAGTGAACTACACATAATATAGCTAAAATAGTGCAGTGAACTTCACATATAATTTTAAAAATCTTCACAGCAATTGCCTACTTAAATCACTTGAAAATTGATGAAAGTAATTACTAATAAAGACAATAGTCAATAAAAAGTAGTATTTTCAT…
comp2245014_c0_seq2	0.058	87	sp|B3FIP1|TZ721_HAPSC	U8-theraphotoxin-Hs1a OS=Haplopelma schmidti PE=3 SV=1	0.058	87	sp|B3FIP2|TZ722_HAPSC	U8-theraphotoxin-Hs1b OS=Haplopelma schmidti PE=3 SV=1	0.29	103	sp|Q66JF7|FA83A_XENTR	Protein FAM83A OS=Xenopus tropicalis GN=fam83a PE=2 SV=1		+			+		TCCCGACACCATACCATTTTCACTCTCTGCAGAATACAGGTTTAAAGATACAGTGCTCTTCACATCCTTTTCGAGATAAACCAGGAATACACCACACACCTTCAGTTATACAAAACAACAAGAAAATGAAGAGCTCTACATTTTTGGCTGTTTTTGCCACCCTCCTGGCCACAGCTCTGGGCTGGTCTAAATATTATGAAGACTCGTTTGACGAACTGCCTGCAAGGCGCAGTTATTGTGTGAATTCTGGAGGGAAGTGTTTCACGTCTAGCGAGTGCTGCAAAGGATACGTGTGTGCTGCCTTCGACGATCTTTTTGGTAGGCATGTGGCAAAGCGTATTGAACCCGGCTACTGTATCCTGGAGAAGTCTCTCAAACCATGTGCGAAGGACGTGGACT…	>comp2245014_c0_seq2 TCCCGACACCATACCATTTTCACTCTCTGCAGAATACAGGTTTAAAGATACAGTGCTCTTCACATCCTTTTCGAGATAAACCAGGAATACACCACACACCTTCAGTTATACAAAACAACAAGAAAATGAAGAGCTCTACATTTTTGGCTGTTTTTGCCACCCTCCTGGCCACAGCTCTGGGCTGGTCTAAATATTATGAAGACTCGTTTGACGAACTGCCTGCAAGGCGCAGTTATTGTGTGAATTCTGGAGGGAAGTGTTTCACGTCTAGCGAGTGCTGCAAAGGATACGTGTGTGCTGCCTTCGACGATCTTTTTGGTAGGCATGTGGCAAAGCGTATTGAACCCGGCTACTGTATCCTGGAGAAGTCTCTCAAAC…
comp2269906_c0_seq2	9.1e-61	631	sp|O01391|UCHL_APLCA	Ubiquitin carboxyl-terminal hydrolase OS=Aplysia californica GN=UCH PE=2 SV=1	2.2e-59	618	sp|Q91Y78|UCHL3_RAT	Ubiquitin carboxyl-terminal hydrolase isozyme L3 OS=Rattus norvegicus GN=Uchl3 PE=1 SV=1	2.8e-59	617	sp|Q2TBG8|UCHL3_BOVIN	Ubiquitin carboxyl-terminal hydrolase isozyme L3 OS=Bos taurus GN=UCHL3 PE=2 SV=1			+		+		AATTTTTAAGGTGAGTAGCCAATTTTATTTTACTGCGCATAAGCTTTTTGACATGTACATTCAAACAATAATTGCATTGACATTTTAAATCAACTAATTCATAGCATGAACACAAGATACATAGCCATGATTTAGTGGGTCGAGAAGGTGTTTCATTGTGATGTAATAGGGTATCGATAAATCATGAAACTACAGTTACACCGCGCAGTTACGACTGCTATTGTATGGAAACTCAACAAACAGAGAATTCAAGTTTGACAGCGGCAAGATATTCCTACATGTGGCACTTCCTAAGTTTACAAAAACACCTCTGCAGTGCAATTAACATGATTAAGTAATTATAATAATTATTATGAGTAAATGAGAAACAAGTTCCGTTACATGTTTACATCTACAACA…	>comp2269906_c0_seq2 AATTTTTAAGGTGAGTAGCCAATTTTATTTTACTGCGCATAAGCTTTTTGACATGTACATTCAAACAATAATTGCATTGACATTTTAAATCAACTAATTCATAGCATGAACACAAGATACATAGCCATGATTTAGTGGGTCGAGAAGGTGTTTCATTGTGATGTAATAGGGTATCGATAAATCATGAAACTACAGTTACACCGCGCAGTTACGACTGCTATTGTATGGAAACTCAACAAACAGAGAATTCAAGTTTGACAGCGGCAAGATATTCCTACATGTGGCACTTCCTAAGTTTACAAAAACACCTCTGCAGTGCAATTAACATGATTAAGTAATTATAATAATTATTATGAGTAAATGAGAAACAAGTTCCGT…
comp2251705_c0_seq1	2.7e-77	787	sp|P62992|RS27A_BOVIN	Ubiquitin-40S ribosomal protein S27a OS=Bos taurus GN=RPS27A PE=1 SV=2	2.7e-77	787	sp|P62978|RS27A_CAVPO	Ubiquitin-40S ribosomal protein S27a OS=Cavia porcellus GN=RPS27A PE=1 SV=2	2.7e-77	787	sp|P62979|RS27A_HUMAN	Ubiquitin-40S ribosomal protein S27a OS=Homo sapiens GN=RPS27A PE=1 SV=2			+	+	++		TCTTGCCCTTTCCGGTTGTGCTCCGCCATCTGACTTGACGCAGAGGGTGGACCAAACATGCAGATCTTCGTAAAAACCCTAACGGGTAAAACCATTACCCTTGAGGTTGAACCCTCAGATACCATCGAAAATGTGAAAGCTAAGATTCAGGATAAGGAAGGTATTCCTCCTGATCAGCAGCGTCTCATCTTTGCCGGCAAACAGTTGGAAGATGGCAGGACCTTGAGCGATTACAACATCCAGAAGGAATCCACCCTCCACTTGGTCCTCCGTCTCCGTGGTGGAGCCAAGAAGAGGAAAAAGAAGAACTACACCACTCCCAAGAAGAACAAGCACAAGAAGAAGAAGGTCAAGCTCGCTGTTCTCAAGTACTACAAGGTTGACGAAAATGGCAAGATC…	>comp2251705_c0_seq1 TCTTGCCCTTTCCGGTTGTGCTCCGCCATCTGACTTGACGCAGAGGGTGGACCAAACATGCAGATCTTCGTAAAAACCCTAACGGGTAAAACCATTACCCTTGAGGTTGAACCCTCAGATACCATCGAAAATGTGAAAGCTAAGATTCAGGATAAGGAAGGTATTCCTCCTGATCAGCAGCGTCTCATCTTTGCCGGCAAACAGTTGGAAGATGGCAGGACCTTGAGCGATTACAACATCCAGAAGGAATCCACCCTCCACTTGGTCCTCCGTCTCCGTGGTGGAGCCAAGAAGAGGAAAAAGAAGAACTACACCACTCCCAAGAAGAACAAGCACAAGAAGAAGAAGGTCAAGCTCGCTGTTCTCAAGTACTACAAG…
comp2273417_c0_seq5	1.8e-99	738	sp|Q5T6F2|UBAP2_HUMAN	Ubiquitin-associated protein 2 OS=Homo sapiens GN=UBAP2 PE=1 SV=1	8.2e-65	693	sp|Q7PMS9|LIG_ANOGA	Protein lingerer OS=Anopheles gambiae GN=lig PE=3 SV=4	2.4e-64	706	sp|Q16VD3|LIG_AEDAE	Protein lingerer OS=Aedes aegypti GN=lig PE=3 SV=1			+		+		TTCCTTCATGTGGGGAAATGTATTTAATACTCTCATTACAGGTACAGTTCATTTTTTGTATACACAGTAGCCTCTGATAAAAAGCAAAAACAAGCCAACGAAATATTCAATACAATACAATTACACGAGATAATATTAGGACAAATAATATATTTACTGTCAAAATAAGCGCTACAGATAAACACATCTCCATATGGCAATTAGAATTGACATTGTCTTTATATATATTTGATACATGTATACTTAAAATAAATCTGTATTATTAAGGAGGAAACCTGGTGAGCACTGTACATACAAATCTATTGAAAATTATAATGACGTGACCTTTCTGTCTTCTGCAACTGTGCTCCACAGTCCCAGAAAGCTTAAATATTCTTTCATGCCTTGTTACGTCCTTAT…	>comp2273417_c0_seq5 TTCCTTCATGTGGGGAAATGTATTTAATACTCTCATTACAGGTACAGTTCATTTTTTGTATACACAGTAGCCTCTGATAAAAAGCAAAAACAAGCCAACGAAATATTCAATACAATACAATTACACGAGATAATATTAGGACAAATAATATATTTACTGTCAAAATAAGCGCTACAGATAAACACATCTCCATATGGCAATTAGAATTGACATTGTCTTTATATATATTTGATACATGTATACTTAAAATAAATCTGTATTATTAAGGAGGAAACCTGGTGAGCACTGTACATACAAATCTATTGAAAATTATAATGACGTGACCTTTCTGTCTTCTGCAACTGTGCTCCACAGTCCCAGAAAGCTTAAATATTCTTT…
comp2257487_c0_seq1	2.3e-64	665	sp|Q3MHP1|UB2L3_BOVIN	Ubiquitin-conjugating enzyme E2 L3 OS=Bos taurus GN=UBE2L3 PE=2 SV=1	2.3e-64	665	sp|P68036|UB2L3_HUMAN	Ubiquitin-conjugating enzyme E2 L3 OS=Homo sapiens GN=UBE2L3 PE=1 SV=1	2.3e-64	665	sp|P68037|UB2L3_MOUSE	Ubiquitin-conjugating enzyme E2 L3 OS=Mus musculus GN=Ube2l3 PE=1 SV=1			+	+	++		AATTTGTGTACAAATCACAGATTTATTGGATTTTCATGTATTTCCCAATTTGGAAAATGTAATTGCGTGTTCACCGAACTCATATTAGAATGAATTAAGACAACAGAGGTTTATGCGTTGTCAGGAACAGAAGGTAATCTACACTACATGTTACACCACAGCTTATCATAGCAACACCAACATGTGTTGCTCGCCTCGACTATGTTCATGAAAGCTTAAGATTAATTATGATGCTGAATATCTCAAAATCTATGCTTCTGTGAAAAAAAAAATCTTAGCTTGACATAAACGGAACATCCAAAATCATTTATAGGCAGTGGACTATCAAATCAGATGATCAAGTCAATCACAATTTCACCCTCATAGCAACATTTACACAAAGACAGATGAAGCAGCCAC…	>comp2257487_c0_seq1 AATTTGTGTACAAATCACAGATTTATTGGATTTTCATGTATTTCCCAATTTGGAAAATGTAATTGCGTGTTCACCGAACTCATATTAGAATGAATTAAGACAACAGAGGTTTATGCGTTGTCAGGAACAGAAGGTAATCTACACTACATGTTACACCACAGCTTATCATAGCAACACCAACATGTGTTGCTCGCCTCGACTATGTTCATGAAAGCTTAAGATTAATTATGATGCTGAATATCTCAAAATCTATGCTTCTGTGAAAAAAAAAATCTTAGCTTGACATAAACGGAACATCCAAAATCATTTATAGGCAGTGGACTATCAAATCAGATGATCAAGTCAATCACAATTTCACCCTCATAGCAACATTTACAC…
comp2269580_c0_seq1	7.2e-68	698	sp|Q0P5K3|UBE2N_BOVIN	Ubiquitin-conjugating enzyme E2 N OS=Bos taurus GN=UBE2N PE=2 SV=1	7.2e-68	698	sp|P61088|UBE2N_HUMAN	Ubiquitin-conjugating enzyme E2 N OS=Homo sapiens GN=UBE2N PE=1 SV=1	7.2e-68	698	sp|P61089|UBE2N_MOUSE	Ubiquitin-conjugating enzyme E2 N OS=Mus musculus GN=Ube2n PE=1 SV=1			+		+		GTTTTTTTTTTTTTTTCAATATTAAGTGAAGCTTGCTATCTCCCTTTTTTATTCTTTTTTATGGTGACATACAAAAGAAAGATTTAATAAGATTGTATTGCTTGAGAAGCAATTATAATTTAAAGGAGGATATTTTTCCTGGAATTATTTAGCTGAAGGCTTCATGAACAATTTTAGACTTTGGATCCACATACACTTGTGGATTAAAAGCTGACTGAAATATTAAACAGAAACATTTCCTATTTCTAAAAAATAATCGACATAGGTCATCGTAATTATCACTCGTCATATTTGAAAAACATGAGCATAATAATTATCAATATATTGCGCGGATATCCAATACAGACCATGCGTTCAATCGGCATCATATTTGTGTACAAGATTTGTAATCATTACACG…	>comp2269580_c0_seq1 GTTTTTTTTTTTTTTTCAATATTAAGTGAAGCTTGCTATCTCCCTTTTTTATTCTTTTTTATGGTGACATACAAAAGAAAGATTTAATAAGATTGTATTGCTTGAGAAGCAATTATAATTTAAAGGAGGATATTTTTCCTGGAATTATTTAGCTGAAGGCTTCATGAACAATTTTAGACTTTGGATCCACATACACTTGTGGATTAAAAGCTGACTGAAATATTAAACAGAAACATTTCCTATTTCTAAAAAATAATCGACATAGGTCATCGTAATTATCACTCGTCATATTTGAAAAACATGAGCATAATAATTATCAATATATTGCGCGGATATCCAATACAGACCATGCGTTCAATCGGCATCATATTTGTGTAC…
comp2277413_c0_seq4	0.01	98	sp|P45602|GALE_KLEPN	UDP-glucose 4-epimerase (Fragment) OS=Klebsiella pneumoniae GN=galE PE=3 SV=1	0.23	99	sp|Q7WTB1|GALE_LACHE	UDP-glucose 4-epimerase OS=Lactobacillus helveticus GN=galE PE=2 SV=1	0.29	98	sp|P21977|GALE_STRTR	UDP-glucose 4-epimerase OS=Streptococcus thermophilus GN=galE PE=3 SV=1		+			+		AGGATGACGAAAGGGAAGCCACCGTCCACTCTTTGCTGCATCAACGCCTCTTCTGCTTCCATCTTGTTGAAGCCCCTTATATGGTAATGCCTCCGTCTTTCCACCTCATCAGCGTCCTGGTGACGGACTGCATCAGTCTCGAGAGTGGGACCAGTTGAAACTTTCTCACAGAAATCGTACACCGTATCAGAGCTGAATAAGATGTATATTTTGCACTTGTCTGCTAGAGCAGCAGTTGACTCTTTGACTGGATTCATCCCAAAAGCACTGAAGTCAATCACTGCATCAAACTGGTCAGTCTCCTTGATCACCTCAATCAGCTCTGTGCAATCCTCCAACTTCAGGTCCCTGTCACACTTGATGTGCTTCACATGGGGCAAAATCCTGTTCTTTGAATCC…	>comp2277413_c0_seq4 AGGATGACGAAAGGGAAGCCACCGTCCACTCTTTGCTGCATCAACGCCTCTTCTGCTTCCATCTTGTTGAAGCCCCTTATATGGTAATGCCTCCGTCTTTCCACCTCATCAGCGTCCTGGTGACGGACTGCATCAGTCTCGAGAGTGGGACCAGTTGAAACTTTCTCACAGAAATCGTACACCGTATCAGAGCTGAATAAGATGTATATTTTGCACTTGTCTGCTAGAGCAGCAGTTGACTCTTTGACTGGATTCATCCCAAAAGCACTGAAGTCAATCACTGCATCAAACTGGTCAGTCTCCTTGATCACCTCAATCAGCTCTGTGCAATCCTCCAACTTCAGGTCCCTGTCACACTTGATGTGCTTCACATGGGGC…
comp2254548_c0_seq3	6e-64	661	sp|Q2KIW9|KCY_BOVIN	UMP-CMP kinase OS=Bos taurus GN=CMPK1 PE=2 SV=2	7.7e-64	660	sp|Q7ZX23|KCY_XENLA	UMP-CMP kinase OS=Xenopus laevis GN=cmpk1 PE=2 SV=2	7.7e-64	660	sp|Q28H12|KCY_XENTR	UMP-CMP kinase OS=Xenopus tropicalis GN=cmpk1 PE=2 SV=2	+	+			++	Candidate_UMP-CMP kinase	TTTTTTTTCATGAACCACTGTAAAATATATTTTGGATAACCATACACATTTGTATTTCGCAAATAACAAAATTTCATTTGTCCCCTGTTAAAATGAAAACAATCCACAAAATGTATATCCAAATAATCCATATTATATAAATCAAAGATTAATTAAGTAACCCTACCATTTTCAAGCAGAATATAAACATCTTTTTTCCCCATCGTCAAAAGCAATCAATTAACAAGCCATATATATATTAATAAAATAATGATTATTTTAATTTAATGTGCAAGGATTTAATTTATCATCTCATCATTAAAATTCAAGATACTTATGTCTACCTAGACCATTTACAAACTAGGTCTAACTAAAATACAAAAAATGTTGTCTCTACAACGAGAACATATTGCGATGTAA…	>comp2254548_c0_seq3_Candidate_UMP-CMP kinase TTTTTTTTCATGAACCACTGTAAAATATATTTTGGATAACCATACACATTTGTATTTCGCAAATAACAAAATTTCATTTGTCCCCTGTTAAAATGAAAACAATCCACAAAATGTATATCCAAATAATCCATATTATATAAATCAAAGATTAATTAAGTAACCCTACCATTTTCAAGCAGAATATAAACATCTTTTTTCCCCATCGTCAAAAGCAATCAATTAACAAGCCATATATATATTAATAAAATAATGATTATTTTAATTTAATGTGCAAGGATTTAATTTATCATCTCATCATTAAAATTCAAGATACTTATGTCTACCTAGACCATTTACAAACTAGGTCTAACTAA…
comp2263787_c0_seq3	5.4e-16	168	sp|P41479|Y091_NPVAC	Uncharacterized 24.1 kDa protein in LEF4-P33 intergenic region OS=Autographa californica nuclear polyhedrosis virus PE=4 SV=1	5e-11	155	sp|P22533|MANB_CALSA	Beta-mannanase/endoglucanase A OS=Caldicellulosiruptor saccharolyticus GN=manA PE=1 SV=2	6.8e-08	132	sp|P21260|YPRO_OWEFU	Uncharacterized proline-rich protein (Fragment) OS=Owenia fusiformis PE=4 SV=1	+	+			++	Candidate_Uncharacterized 24.1 kDa protein	GTTGGTGTTGGAGGAATAGTTGGTGTTGGAGGAACTGTTGGTGTTGGAGGAACTGTTGGTGTTGGGGGTGGTGTTGGAGTCTGTGGCGTTGTAGTAACTGGTGGAGGCTGAGTAGTTGTAGGAGTTGGAGGCACCGGTGTAGTTGTTGATTCAAAACAGCCTTCTATCCTTAGAGATATCTTGTCAGGTGGTGACACTTGACCACAGAGCATGATAACCCTGACCTCATCAATTTTGTCTGTAATAACCACACCAGTAAGGGTGCCAGTTTCTTTGAAAGTATACAACTTATTCTTTATCACAGTTCCATCATTCTTGTACTTAATTCGAACAGATAATGTCATCCCATCAGAACAAATTTCATCCGCTCGCAACAGGAGTTTGGTGACTCTGATGGGT…	>comp2263787_c0_seq3_Candidate_Uncharacterized 24.1 kDa protein GTTGGTGTTGGAGGAATAGTTGGTGTTGGAGGAACTGTTGGTGTTGGAGGAACTGTTGGTGTTGGGGGTGGTGTTGGAGTCTGTGGCGTTGTAGTAACTGGTGGAGGCTGAGTAGTTGTAGGAGTTGGAGGCACCGGTGTAGTTGTTGATTCAAAACAGCCTTCTATCCTTAGAGATATCTTGTCAGGTGGTGACACTTGACCACAGAGCATGATAACCCTGACCTCATCAATTTTGTCTGTAATAACCACACCAGTAAGGGTGCCAGTTTCTTTGAAAGTATACAACTTATTCTTTATCACAGTTCCATCATTCTTGTACTTAATTCGAACAGA…
comp2242407_c0_seq1	0.031	122	sp|P18305|443R_IIV6	Uncharacterized protein 443R OS=Invertebrate iridescent virus 6 GN=IIV6-443R PE=3 SV=2	0.43	79	sp|Q6BIS8|TOS6_DEBHA	Protein TOS6 OS=Debaryomyces hansenii (strain ATCC 36239 / CBS 767 / JCM 1990 / NBRC 0083 / IGC 2968) GN=TOS6 PE=3 SV=1	0.993	94	sp|A1CXL0|YTM1_NEOFI	Ribosome biogenesis protein ytm1 OS=Neosartorya fischeri (strain ATCC 1020 / DSM 3700 / CBS 544.65 / FGSC A1164 / JCM 1740 / NRRL 181 / WB 181) GN=ytm1 PE=3 SV=1	+	+	+		+++	Candidate_Uncharacterized protein 443R	TTTTTTTTTTTTTTTTTACTTTTTGAATGCTTGTTTATTAATAGAGAATTATGACACAAAGTTAAGGAACTGAAAATATATAAGACAAGTTCCAGTGTGTTGTGAACATAATCTGCAACTGTGTTCCATCTTTCCTTGTGGTTTCCATATGGTCCGATCATTCCTGCCTTCCAAAATAAGTGTGAAGTGGTGTACAGGGAAATAAGCCCGGCCCTCTAGGGATGTAGCGAATCTGTTCTTTCCAATCTTTTTGGTCACACATGGCCCATTTCTTCCACTTCCTCTCTCTCATCTCTTGCTTCTTTTCTGCAATTCTTTTCTTTTCTGCAACAATTTTTTTATTCAATAGATCAAGCCATCTTCTCAATCCGATTTTCAGTTTCTTCTTGGTTGCACGTT…	>comp2242407_c0_seq1_Candidate_Uncharacterized protein 443R TTTTTTTTTTTTTTTTTACTTTTTGAATGCTTGTTTATTAATAGAGAATTATGACACAAAGTTAAGGAACTGAAAATATATAAGACAAGTTCCAGTGTGTTGTGAACATAATCTGCAACTGTGTTCCATCTTTCCTTGTGGTTTCCATATGGTCCGATCATTCCTGCCTTCCAAAATAAGTGTGAAGTGGTGTACAGGGAAATAAGCCCGGCCCTCTAGGGATGTAGCGAATCTGTTCTTTCCAATCTTTTTGGTCACACATGGCCCATTTCTTCCACTTCCTCTCTCTCATCTCTTGCTTCTTTTCTGCAATTCTTTTCTTTTCTGCAACAATTTTTT…
comp2273519_c1_seq9	0.997	75	sp|Q9UF83|YM012_HUMAN	Uncharacterized protein DKFZp434B061 OS=Homo sapiens PE=2 SV=2										+			+		CTTTTTTTACCAAATAATATTTTATTAGAATTGGCGACACTCATACATACACCGAATAAGAGCAGTGGCACCTGAGAAAAAAATTGCACCACTTGGATTTTAACAAAGCAAGCCTAAGACTGGCAAATCCAGGTGTATAATTTCAACATGTTTTTCAAAGTTGTTTTGTCCAAGAGTTCAAGACTTTAATAATTATAAGAATCACTGGGATTTACAATGGTGAAGATGGTCAAATCGGCAACTTCTTTTTATCATTCGATAATAATTGGTCTTGTACTTCACTTTGCCATGTTTGCTAGTTGCAAACTAAATGTTGGAGAGATCTGAAATGCTTTCTGCAGCCAGTGCCTCAGTGACCGAGGTCACTAAAATTGACCAATTTGACCATCAACAGCATAT…	>comp2273519_c1_seq9 CTTTTTTTACCAAATAATATTTTATTAGAATTGGCGACACTCATACATACACCGAATAAGAGCAGTGGCACCTGAGAAAAAAATTGCACCACTTGGATTTTAACAAAGCAAGCCTAAGACTGGCAAATCCAGGTGTATAATTTCAACATGTTTTTCAAAGTTGTTTTGTCCAAGAGTTCAAGACTTTAATAATTATAAGAATCACTGGGATTTACAATGGTGAAGATGGTCAAATCGGCAACTTCTTTTTATCATTCGATAATAATTGGTCTTGTACTTCACTTTGCCATGTTTGCTAGTTGCAAACTAAATGTTGGAGAGATCTGAAATGCTTTCTGCAGCCAGTGCCTCAGTGACCGAGGTCACTAAAATTGACCA…
comp1197507_c0_seq1	5.3e-05	107	sp|Q5DAJ3|SJ055_SCHJA	Uncharacterized protein SJCHGC06055 OS=Schistosoma japonicum GN=SJCHGC06055 PE=3 SV=1	0.0002	102	sp|Q5BQU6|SJ803_SCHJA	Uncharacterized protein SJCHGC09803 OS=Schistosoma japonicum GN=SJCHGC09803 PE=3 SV=1	0.00097	96	sp|Q5BQU9|SJ800_SCHJA	Uncharacterized protein SJCHGC09800 OS=Schistosoma japonicum GN=SJCHGC09800 PE=3 SV=1	+	+			++	Group_SJCHGC06055	GAATTTTTTTTTTGAGTTTTAATAAGTTGGTTTATTGCTATACAAAAATTGACACAAATTTCATAGATCAGAATTTAATTCGTGATTTTCGCAAAATTATTCAAAGAGACTTTCGTGAGAGTTTTTAGTTATAGCTCTTGCATTTTCCTGTGGGCGACAAGGCAAACTTCTTGTCACAGTATCCCCTGCACTGTGCATTTCTGTAACAGTCCTTGCCATCTTCTTTTTCCGGGAGGCATTCACCATTAATCTTGAGGAAGTGAGCTTTCTGGCACTTAAAAAATTTGCAGCACTGACTGTCGCGCTGGCATATGACCTTCTCTTCGAAGCAGGTGACACAATGCCCTGACATATCATTAAAGCCCACTCCCTCTTTTCTTTGACACAGAGTCTTCCCAC…	>comp1197507_c0_seq1_Group_SJCHGC06055 GAATTTTTTTTTTGAGTTTTAATAAGTTGGTTTATTGCTATACAAAAATTGACACAAATTTCATAGATCAGAATTTAATTCGTGATTTTCGCAAAATTATTCAAAGAGACTTTCGTGAGAGTTTTTAGTTATAGCTCTTGCATTTTCCTGTGGGCGACAAGGCAAACTTCTTGTCACAGTATCCCCTGCACTGTGCATTTCTGTAACAGTCCTTGCCATCTTCTTTTTCCGGGAGGCATTCACCATTAATCTTGAGGAAGTGAGCTTTCTGGCACTTAAAAAATTTGCAGCACTGACTGTCGCGCTGGCATATGACCTTCTCTTCGAAGCAGGTGACACAATGCCCTGACATATCATTAA…
comp2223962_c0_seq7	8.1e-05	107	sp|Q5DAJ3|SJ055_SCHJA	Uncharacterized protein SJCHGC06055 OS=Schistosoma japonicum GN=SJCHGC06055 PE=3 SV=1	9.7e-05	109	sp|Q5DFA1|SJ643_SCHJA	UPF0506 protein SJCHGC09643 OS=Schistosoma japonicum GN=SJCHGC09643 PE=2 SV=1	0.0039	92	sp|Q5BQU9|SJ800_SCHJA	Uncharacterized protein SJCHGC09800 OS=Schistosoma japonicum GN=SJCHGC09800 PE=3 SV=1		+	+	+	+++	Group_SJCHGC06055	TTTTTTTTTGCTTTATTGTATTTTAATCATCCCAGAGTTAGTACATCAAAATTGATTTCAATTGGTTCTGTGCATGGTATTGCACTTCCATGCACACTGCACAAGCCTATATAACCTTGGAACATTCCGTGAACTTCAATATTGTTTTGTAATTCATCGACACCTCATTGGCACTTTCCATAAACTTCGTACCACTTCTTCTGGCAGCGGATGCGGCACATGGAATCTGTATGGCACTTGGCCCCAGCTGGCAAGGGAGGTTTGCAGTGTCCATTTAGTTTGAATGCCCTGGATTTTTCACACGCAAATCCTGGGCAGCACTGGTCATCCCTCACACAATTCTTGTCCAATCCACCGCAATCTGTGCATCTGCCGCCCTCAATAGGATTCCATTTTCCT…	>comp2223962_c0_seq7_Group_SJCHGC06055 TTTTTTTTTGCTTTATTGTATTTTAATCATCCCAGAGTTAGTACATCAAAATTGATTTCAATTGGTTCTGTGCATGGTATTGCACTTCCATGCACACTGCACAAGCCTATATAACCTTGGAACATTCCGTGAACTTCAATATTGTTTTGTAATTCATCGACACCTCATTGGCACTTTCCATAAACTTCGTACCACTTCTTCTGGCAGCGGATGCGGCACATGGAATCTGTATGGCACTTGGCCCCAGCTGGCAAGGGAGGTTTGCAGTGTCCATTTAGTTTGAATGCCCTGGATTTTTCACACGCAAATCCTGGGCAGCACTGGTCATCCCTCACACAATTCTTGTCCAATCCACCGCAA…
[truncated: 19 more rows]
