# Supplementary material for: Combined transcriptome and proteome profiling reveals specific molecular brain signatures for sex, maturation and circalunar clock phase
Source: eLife. 2019 Feb 15;8:e41556. doi: 10.7554/eLife.41556 (PMC6377233; doi:10.7554/eLife.41556)
Supplement: Figure 5—source data 19. — This file contains the IDs, mean expression values, top hit by blastX with e-value cut-off 10-4, e-value corresponding to blast hit, number of identical/ similar AA or gaps in blast alignment ("identity", "positives", "gaps") for all proteins significantly regulated during maturation. [file elife-41556-fig5-data19.xlsx]

## Sheet: 20181211_allMaturationProtein_m
Protein.ID	IM_NM_mean	PM_NM_F_mean	PM_NM_M_mean	M_NM_F_mean	M_NM_M_mean	IM_FRFM_mean	PM_FRFM_F_mean	PM_FRFM_M_mean	Top.hit.ID	E.value	Identity....	Positives....	Gaps....
comp1194106_c0_seq1_m.742	1.00891	1.27113	1.1859	1.26364	1.24398	NA	NA	NA	ref|XP_013405017.1| PREDICTED: proteasome subunit beta type-2-like [Lingula anatina]	3e-108	75	89	0
comp1194290_c0_seq1_m.781	2.11809	1.33205	1.36326	2.41935	2.47671	3.5894	1.41901	1.3635	NA	NA	NA	NA	NA
comp1194294_c0_seq1_m.785	1.50645	1.71931	1.91074	2.00132	1.83852	0.957182	1.92722	1.23814	ref|XP_014703348.1| PREDICTED: 40S ribosomal protein S13 [Equus asinus]	3e-101	92	99	0
comp1194322_c0_seq2_m.793	0.529409	0.63115	0.655338	0.618194	0.620368	0.56725	0.677155	0.610379	ref|XP_015195580.1| PREDICTED: CBP80/20-dependent translation initiation factor isoform X2 [Lepisosteus oculatus]	1e-25	32	58	3
comp1194362_c0_seq2_m.804	1.11022	1.20543	1.10208	1.40544	1.38634	1.16606	1.14969	1.07414	gb|ELT89000.1| hypothetical protein CAPTEDRAFT_149854 [Capitella teleta]	0	71	83	0
comp1196959_c0_seq2_m.1014	1.26204	1.67949	1.57119	1.29703	1.21932	0.983819	1.83396	1.62923	gb|ELU00318.1| hypothetical protein CAPTEDRAFT_184257 [Capitella teleta]	0	82	91	1
comp1197507_c0_seq1_m.1032	4.51055	3.13097	3.71467	4.8817	4.98812	3.3108	2.80261	3.18839	gb|ELT96049.1| hypothetical protein CAPTEDRAFT_223820 [Capitella teleta]	2e-07	33	53	4
comp1198575_c0_seq1_m.1066	1.38929	1.0781	1.05339	1.36638	1.44201	0.997685	0.923817	0.9394	ref|XP_007894964.1| PREDICTED: inositol monophosphatase 1 [Callorhinchus milii] ref|XP_007894965.1| PREDICTED: inositol monophosphatase 1 [Callorhinchus milii] ref|XP_007894967.1| PREDICTED: inositol	8e-97	54	76	0
comp1199432_c0_seq1_m.1095	1.22566	0.947072	0.920291	1.11191	1.09221	1.05199	0.893638	0.967354	ref|XP_013403914.1| PREDICTED: protein TFG-like [Lingula anatina]	3e-83	68	77	4
comp1226347_c0_seq1_m.1231	3.75595	4.28907	4.49075	4.60256	4.59992	3.9705	4.78027	5.00825	gb|ELU16324.1| hypothetical protein CAPTEDRAFT_192434 [Capitella teleta]	9e-50	26	42	14
comp1234630_c0_seq1_m.1254	3.06748	2.54875	2.73706	3.11009	3.04008	3.33701	2.77027	2.99702	ref|XP_009027335.1| hypothetical protein HELRODRAFT_164028 [Helobdella robusta] gb|ESN94228.1| hypothetical protein HELRODRAFT_164028 [Helobdella robusta]	5e-39	51	73	0
comp1244797_c0_seq1_m.1278	4.37211	5.91632	5.89873	5.28501	5.47988	4.04467	6.08861	5.25813	gb|ELT90725.1| hypothetical protein CAPTEDRAFT_152439 [Capitella teleta]	6e-150	82	90	0
comp1326513_c0_seq1_m.1923	16.9789	10.5727	12.8541	18.9795	15.7144	15.4123	10.9107	10.4268	sp|Q5K473.2|HEMTM_SIPNU RecName: Full=Myohemerythrin; Short=MHr; Short=myoHr	2e-48	62	77	0
comp1335339_c0_seq2_m.1954	0.769357	0.905415	1.01866	0.967428	0.946872	0.800823	0.871588	0.885433	ref|XP_008290399.1| PREDICTED: ribonuclease UK114 [Stegastes partitus]	7e-49	57	78	1
comp1769718_c0_seq1_m.2239	0.567273	0.719705	0.682667	0.763226	0.706705	0.75068	0.714141	0.740033	NA	NA	NA	NA	NA
comp1781461_c0_seq1_m.2253	2.32401	2.3316	2.20807	1.58354	1.5523	2.29325	2.06694	2.35826	ref|NP_001009489.1| 2 ' -5 ' oligoadenylate synthetase 1K [Rattus norvegicus] gb|AAP41938.1| 2'-5' oligoadenylate synthetase 1K [Rattus norvegicus] gb|AAH88437.1| 2 ' -5 ' oligoadenylate synthetase 1K	1e-10	26	44	18
comp1785956_c0_seq1_m.2259	2.58175	3.39289	3.16951	3.62753	2.36122	2.20241	3.31403	2.421	gb|ALO75581.1| hemoglobin subunit A2 [Siboglinum ekmani]	2e-30	40	58	0
comp1876805_c0_seq1_m.2339	2.40917	3.2489	2.91061	2.8897	2.76202	1.98522	2.83717	2.39884	ref|XP_013389686.1| PREDICTED: actin-related protein 2/3 complex subunit 2-like isoform X2 [Lingula anatina] ref|XP_013388344.1| PREDICTED: actin-related protein 2/3 complex subunit 2-like isoform X3	9e-169	79	89	1
comp1888169_c0_seq2_m.2479	0.0848844	0.118548	0.126084	0.133174	0.139134	NA	NA	NA	ref|NP_001187542.1| ubiquitin-fold modifier 1 [Ictalurus punctatus] gb|ADO28792.1| ubiquitin-fold modifier 1 [Ictalurus punctatus]	3e-47	92	98	0
comp1910314_c0_seq1_m.2848	1.44819	0.909145	1.0871	1.30498	1.31231	1.35124	0.710582	0.754642	gb|ABO26646.1| mitochondrial ATP synthase delta chain [Haliotis discus discus]	6e-74	67	83	0
comp1916779_c0_seq1_m.2944	9.05603	6.55465	7.25721	7.51183	6.67594	9.1925	6.36104	6.23977	gb|ELU17153.1| hypothetical protein CAPTEDRAFT_119323 [Capitella teleta]	2e-38	54	78	1
comp1926910_c0_seq1_m.3122	2.32674	1.87828	1.81652	1.99293	1.87208	2.07482	1.84933	1.9012	gb|KFM68300.1| Alcohol dehydrogenase [NADP(+)] A, partial [Stegodyphus mimosarum]	4e-91	50	67	3
comp1945561_c0_seq2_m.3380	7.10871	6.16013	6.74878	4.04697	4.38572	6.25162	5.81446	6.45287	gb|ELT99852.1| hypothetical protein CAPTEDRAFT_226930 [Capitella teleta]	5e-12	46	63	4
comp1953077_c0_seq1_m.3483	0.788532	0.525192	0.531594	0.610687	0.653733	1.17245	0.60611	1.01717	gb|ELU09461.1| hypothetical protein CAPTEDRAFT_223662 [Capitella teleta]	2e-60	35	50	10
comp1953876_c0_seq1_m.3493	8.6276	13.8172	12.4332	11.956	11.4673	9.16794	15.6996	13.607	gb|ELU02265.1| hypothetical protein CAPTEDRAFT_163594 [Capitella teleta]	0	90	95	0
comp1958245_c0_seq1_m.3536	1.84135	1.31913	1.41261	1.43004	1.25552	0.931473	0.974845	0.953051	gb|ACD65133.1| putative 60S ribosomal protein RPLP1 [Novocrania anomala]	9e-23	76	90	0
comp1961272_c0_seq1_m.3584	0.155129	0.20336	0.210106	0.190383	0.189764	0.160004	0.204038	0.181931	gb|ELT93210.1| hypothetical protein CAPTEDRAFT_20690 [Capitella teleta]	1e-103	70	84	0
comp1965369_c0_seq1_contamination_m.3664	3.24508	2.99256	3.70963	4.72891	5.06249	2.68882	2.10154	1.21372	ref|XP_001967880.1| uncharacterized protein Dana_GF22861 [Drosophila ananassae] ref|XP_001967919.1| uncharacterized protein Dana_GF18864 [Drosophila ananassae] gb|EDV44842.1| uncharacterized protein D	1e-66	97	98	2
comp1971911_c0_seq1_m.3786	1.47477	1.31975	1.33517	1.14997	1.17726	1.09801	1.18528	1.21683	gb|ELT87616.1| hypothetical protein CAPTEDRAFT_179888 [Capitella teleta]	0	78	88	1
comp1977957_c0_seq1_m.3878	0.814232	1.17595	1.10164	0.91371	0.887678	0.832319	1.08089	0.884425	gb|EDL17115.1| ribosomal protein S15a, isoform CRA_b [Mus musculus]	4e-83	85	92	0
comp2004487_c0_seq1_m.4269	1.30661	1.36319	1.63648	2.24772	2.07627	1.39969	1.21188	0.913306	emb|CAL26301.1| CG5499 [Drosophila melanogaster]	6e-74	100	100	0
comp2107035_c0_seq2_m.6021	6.67772	5.42765	5.74114	6.18977	5.79085	5.42243	4.72355	5.67149	gb|ELU18051.1| hypothetical protein CAPTEDRAFT_222792 [Capitella teleta]	1e-31	34	55	7
comp2132126_c0_seq4_m.6558	0.743681	0.990866	0.895819	0.780938	0.778378	0.844003	1.10808	1.03262	gb|ELU17603.1| hypothetical protein CAPTEDRAFT_226009 [Capitella teleta]	1e-129	93	95	0
comp2138816_c0_seq1_m.6842	1.18734	1.35684	1.22614	1.09393	0.84796	1.13113	1.02971	1.00825	ref|WP_053977170.1| hypothetical protein [Mangrovimonas sp. ST2L12]	3e-07	34	55	9
comp2138952_c0_seq1_m.6867	3.6284	5.55391	4.89207	3.89619	3.66376	3.37362	5.88281	5.13246	NA	NA	NA	NA	NA
comp2139115_c0_seq1_m.6894	17.6001	15.9724	16.3067	10.6519	9.70343	11.3658	13.2474	14.0631	gb|ELU06446.1| hypothetical protein CAPTEDRAFT_21877 [Capitella teleta]	1e-172	77	87	0
comp2139380_c0_seq1_m.6935	12.4229	15.7581	15.9679	15.6116	15.6001	12.0673	16.1006	15.5994	gb|ELU15461.1| hypothetical protein CAPTEDRAFT_157862 [Capitella teleta]	0	87	93	1
comp2140166_c0_seq1_m.7086	2.66511	3.05846	2.72976	3.5227	3.1939	2.93017	3.10348	2.91867	gb|ELT88410.1| hypothetical protein CAPTEDRAFT_172212 [Capitella teleta]	0	58	73	0
comp2141997_c0_seq1_m.7386	0.624235	1.44388	1.24802	0.732741	0.655271	0.739272	1.43837	1.12311	ref|XP_013385025.1| PREDICTED: uncharacterized protein LOC106154987 [Lingula anatina]	2e-05	31	47	8
comp2142866_c0_seq1_m.7576	0.512233	0.624918	0.578003	0.718947	0.642836	0.56975	0.63332	0.60019	gb|ELT98159.1| hypothetical protein CAPTEDRAFT_226124 [Capitella teleta]	0	72	84	0
comp2143334_c0_seq2_m.7649	2.50015	3.8262	3.42782	3.02631	3.0451	3.15221	3.90176	3.48772	ref|XP_011432966.1| PREDICTED: 40S ribosomal protein S2 [Crassostrea gigas]	1e-150	90	94	0
comp2143411_c0_seq1_m.7656	4.32592	3.4769	3.80153	4.69675	4.37976	3.39502	2.9891	3.04289	ref|XP_014788900.1| PREDICTED: ATP synthase subunit d, mitochondrial-like [Octopus bimaculoides] gb|KOF65363.1| hypothetical protein OCBIM_22015716mg [Octopus bimaculoides]	4e-50	56	72	1
comp2187328_c0_seq1_m.10936	2.09757	2.50193	2.37753	2.07949	1.71601	2.03774	2.51873	2.50099	ref|XP_010754408.1| PREDICTED: probable G-protein coupled receptor 133, partial [Larimichthys crocea]	3e-09	30	45	9
comp2189372_c0_seq1_m.11219	4.80544	2.81245	3.3757	3.83052	3.89585	6.12367	1.96527	2.49654	gb|AEB54654.1| ATPase inhibitory factor 1 [Procambarus clarkii]	7e-17	56	86	0
comp2197446_c0_seq1_m.12404	5.20546	6.47012	6.08742	5.42697	5.27962	4.48893	5.60365	4.67061	gb|AAX28980.1| ribosomal protein S3 [synthetic construct]	2e-157	92	96	0
comp2198016_c0_seq1_m.12499	3.40962	3.9463	4.201	3.69289	3.62783	3.32977	3.93562	3.747	gb|ABW23199.1| ribosomal protein rps3a [Eurythoe complanata]	2e-150	86	92	1
comp2201786_c0_seq1_m.13247	0.85287	1.25239	1.43496	1.5139	1.36563	0.61052	1.20758	0.972715	gb|ABZ04268.1| ribosomal protein rps19 [Lineus viridis]	5e-78	73	87	0
comp2202068_c0_seq1_m.13304	1.31316	1.09631	1.14685	1.03532	1.05918	1.2529	0.947096	0.996165	ref|XP_014664033.1| PREDICTED: S-phase kinase-associated protein 1 [Priapulus caudatus]	1e-81	99	100	0
comp2203251_c0_seq1_m.13504	1.15288	1.60229	1.48461	1.21293	1.16802	1.31334	1.64787	1.47368	ref|XP_013398405.1| PREDICTED: 60S ribosomal protein L18-like [Lingula anatina]	3e-110	83	93	0
comp2204672_c0_seq1_m.13711	0.929275	0.734679	0.786412	0.688824	0.651382	NA	NA	NA	ref|XP_013383370.1| PREDICTED: neudesin-like [Lingula anatina]	2e-44	66	83	2
comp2204754_c0_seq1_m.13720	1.42528	2.15854	2.14762	1.55636	1.44854	1.51089	2.41028	2.14453	gb|AIU94816.1| 40S ribosomal protein [Phragmatopoma lapidosa] gb|AIU94819.1| 60S ribosomal protein [Phragmatopoma lapidosa] gb|AIU94841.1| 60S ribosomal protein [Phragmatopoma lapidosa]	1e-105	73	88	0
comp2206512_c0_seq1_m.14012	6.08269	5.62171	6.49782	7.26149	8.12552	7.71633	6.02192	5.30607	gb|KJH53109.1| core histone H2A/H2B/H3/H4 [Dictyocaulus viviparus]	1e-87	97	99	0
comp2208474_c0_seq1_m.14351	6.14871	3.60478	4.20623	7.42321	7.17235	6.06727	2.39762	2.64405	gb|AHB62365.1| whitnin-1 neuropeptide precursor SPTR [Platynereis dumerilii]	7e-64	100	100	0
comp2211270_c0_seq1_m.14951	0.357892	0.461987	0.469667	0.425828	0.40987	0.410229	0.432428	0.410526	gb|ELT98134.1| hypothetical protein CAPTEDRAFT_225969 [Capitella teleta]	9e-82	61	78	1
comp2211414_c0_seq1_m.14992	4.4184	4.92659	4.84161	4.18632	4.10327	4.44059	4.24924	4.46047	ref|XP_013390625.1| PREDICTED: T-complex protein 1 subunit theta-like [Lingula anatina]	0	73	88	0
comp2212572_c0_seq1_m.15390	0.750878	0.930864	0.891072	0.90097	0.864302	1.07049	1.08733	1.04274	ref|XP_002733522.1| PREDICTED: 26S proteasome non-ATPase regulatory subunit 3-like isoform X1 [Saccoglossus kowalevskii]	0	71	86	1
comp2214845_c0_seq1_m.16111	0.386682	0.483154	0.499381	0.524373	0.526747	NA	NA	NA	ref|XP_013064721.1| PREDICTED: isochorismatase domain-containing protein 1-like [Biomphalaria glabrata]	4e-96	70	87	0
comp2221095_c0_seq1_m.18558	0.612344	0.701126	0.657256	0.508504	0.436378	0.525647	0.691615	0.668923	NA	NA	NA	NA	NA
comp2222959_c0_seq1_m.19328	1.19325	0.768414	0.879455	1.14819	1.21866	1.19017	0.933358	0.709445	ref|NP_001248345.1| histone 1o [Aplysia californica] gb|ABW86950.1| histone 1o [Aplysia californica]	4e-32	78	91	0
comp2223962_c0_seq7_m.19686	3.42802	2.15262	2.63369	3.14772	3.02571	3.4213	1.5998	1.82307	gb|ELT96049.1| hypothetical protein CAPTEDRAFT_223820 [Capitella teleta]	1e-14	38	54	1
comp2224014_c0_seq1_m.19704	2.40245	1.88009	2.26075	2.98723	3.13348	1.47675	1.58577	1.68945	sp|Q6QLW4.1|CYC_PECGU RecName: Full=Cytochrome c gb|AAS48105.1| cytochrome c [Pectinaria gouldii]	8e-66	92	96	0
comp2224448_c0_seq1_m.19874	5.33493	3.78849	4.18216	4.68817	4.35247	4.2316	3.68803	3.94668	gb|AAH39635.1| eukaryotic translation elongation factor 1 beta 2, partial [Mus musculus]	7e-67	75	88	3
comp2225664_c0_seq1_m.20382	80.5543	109.47	111.27	78.0778	81.3049	71.5848	120.019	105.471	ref|XP_011198527.1| PREDICTED: actin, cytoplasmic A3a isoform X1 [Bactrocera dorsalis]	0	98	99	0
comp2226333_c0_seq1_m.20670	1.29364	1.06366	1.21655	1.28419	1.39379	1.26381	0.953601	1.04989	NA	NA	NA	NA	NA
comp2226643_c0_seq1_m.20830	4.55483	3.09512	3.41356	3.70076	3.43903	3.99422	2.76897	3.54697	ref|XP_006125555.1| PREDICTED: calmodulin-like isoform X2 [Pelodiscus sinensis] ref|XP_006125557.1| PREDICTED: calmodulin isoform X1 [Pelodiscus sinensis]	7e-28	38	60	3
comp2228369_c0_seq1_m.21627	4.56271	4.44669	4.36105	3.8941	3.73182	3.93964	4.71157	4.27081	gb|ACR24948.1| ribosomal protein L15 [Lepidochitona cinerea]	2e-100	77	89	0
comp2228430_c0_seq1_m.21640	1.74791	2.21543	2.06988	1.82857	1.84511	1.92006	1.98232	2.00839	ref|XP_013392056.1| PREDICTED: T-complex protein 1 subunit eta-like isoform X1 [Lingula anatina] ref|XP_013392057.1| PREDICTED: T-complex protein 1 subunit eta-like isoform X2 [Lingula anatina]	0	83	93	0
comp2229729_c0_seq1_m.22264	0.206009	0.410257	0.407946	0.284221	0.269604	0.270677	0.550649	0.430252	gb|AFP52951.1| beta-actin [Euphyllia ancora]	4e-158	64	79	5
comp2231610_c0_seq1_m.23229	4.0306	4.79229	4.81865	5.02395	5.27304	3.57518	5.05334	4.42468	ref|XP_014780437.1| PREDICTED: ATP synthase subunit gamma, mitochondrial-like [Octopus bimaculoides] gb|KOF77184.1| hypothetical protein OCBIM_22032413mg [Octopus bimaculoides]	1e-133	64	81	1
comp2232290_c0_seq2_m.23637	3.49923	3.96576	4.27076	1.79329	1.8975	3.03754	4.95706	4.60144	NA	NA	NA	NA	NA
comp2232641_c0_seq7_m.23875	0.440903	0.407522	0.387654	0.48396	0.487331	0.580176	0.348093	0.363265	gb|ELU10110.1| hypothetical protein CAPTEDRAFT_219480 [Capitella teleta]	0	74	84	2
comp2232805_c0_seq1_m.23974	3.38526	3.51833	3.77214	3.68471	5.88384	2.33693	3.39679	3.51154	gb|ELT87930.1| hypothetical protein CAPTEDRAFT_224291 [Capitella teleta]	1e-91	52	64	4
comp2232909_c0_seq1_m.24034	0.536584	0.700584	1.47638	0.788827	1.91812	0.636388	1.00616	2.2043	sp|P02219.1|GLB1_TYLHE RecName: Full=Extracellular globin-1; AltName: Full=Erythrocruorin; AltName: Full=Extracellular globin I prf||0812179A hemoglobin	1e-43	57	71	1
comp2233700_c1_seq1_m.24550	0.437179	0.765905	0.687263	0.451231	0.399926	0.677293	0.82612	0.766485	ref|XP_006818908.1| PREDICTED: poly(ADP-ribose) polymerase pme-5-like [Saccoglossus kowalevskii]	1e-66	42	62	4
comp2233777_c0_seq1_m.24586	3.58306	3.65805	3.36959	3.22965	3.0833	2.98337	3.75277	3.54455	gb|ELU14710.1| hypothetical protein CAPTEDRAFT_122859, partial [Capitella teleta]	0	52	69	2
comp2234079_c0_seq2_m.24745	0.738144	0.940461	0.860121	0.94435	0.891473	0.83655	1.01842	0.941339	gb|ELU07857.1| hypothetical protein CAPTEDRAFT_158105 [Capitella teleta]	0	66	81	2
comp2234282_c0_seq1_m.24908	1.183	1.44918	1.39454	2.27885	2.26957	1.15918	1.32867	1.18059	ref|XP_013400508.1| PREDICTED: retinal dehydrogenase 2-like [Lingula anatina]	0	73	85	0
comp2234809_c0_seq1_m.25266	6.76091	5.91683	6.16023	7.14474	7.18315	4.31126	4.64995	5.2501	ref|XP_003383648.1| PREDICTED: profilin-like [Amphimedon queenslandica]	6e-40	57	73	0
comp2236007_c0_seq2_m.26049	4.40211	3.97276	4.17722	5.77574	5.18391	3.78263	3.11598	3.3574	ref|XP_004066909.1| PREDICTED: cellular retinoic acid-binding protein 1 [Oryzias latipes]	8e-24	42	55	17
comp2236614_c0_seq1_m.26450	5.12729	6.48784	7.05235	3.17392	3.69679	4.52095	6.70859	6.65683	gb|ELT89874.1| hypothetical protein CAPTEDRAFT_223748 [Capitella teleta]	8e-85	53	66	3
comp2236992_c0_seq1_m.26663	4.45689	3.42253	3.755	4.07211	4.15043	3.61896	3.22054	3.72183	gb|AIU94781.1| hypothetical protein [Phragmatopoma lapidosa]	4e-64	78	89	0
comp2237468_c0_seq1_m.27022	7.29949	2.48874	2.84985	3.15042	3.31834	8.41118	1.80604	2.502	NA	NA	NA	NA	NA
comp2237757_c0_seq1_m.27251	3.6393	4.11277	4.13009	4.26671	4.27106	3.53281	4.24358	4.09045	ref|XP_014787824.1| PREDICTED: ATP synthase subunit b, mitochondrial-like [Octopus bimaculoides] gb|KOF66940.1| hypothetical protein OCBIM_22010866mg [Octopus bimaculoides]	3e-76	48	68	3
comp2238188_c0_seq1_m.27576	1.19772	0.764655	0.820221	1.23004	1.33603	1.17331	0.761771	0.860234	NA	NA	NA	NA	NA
comp2239691_c0_seq1_m.28548	25.7057	22.8302	27.306	14.3197	14.6929	17.4298	18.6799	16.8167	sp|P04571.1|SCP_HEDDI RecName: Full=Sarcoplasmic calcium-binding protein; Short=SCP pdb|2SCP|A Chain A, Structure Of A Sarcoplasmic Calcium-Binding Protein From Nereis Diversicolor Refined At 2.0 Angs	3e-88	78	86	0
comp2239935_c0_seq1_m.28757	2.30415	2.16858	2.25183	1.99819	1.93329	2.39142	2.32446	2.69385	ref|XP_011423091.1| PREDICTED: RNA-binding protein 1-like [Crassostrea gigas] ref|XP_011423093.1| PREDICTED: RNA-binding protein 1-like [Crassostrea gigas]	2e-38	83	95	0
comp2241424_c0_seq3_m.29932	1.78321	1.61075	1.73035	1.5756	1.33171	0.923523	1.34502	1.57657	ref|XP_011444269.1| PREDICTED: peptidyl-prolyl cis-trans isomerase-like [Crassostrea gigas] gb|EKC29243.1| Peptidyl-prolyl cis-trans isomerase B [Crassostrea gigas]	2e-91	60	79	0
comp2241992_c0_seq1_m.30524	1.01838	1.1034	1.16036	1.3107	1.2667	1.12965	1.12465	1.17239	ref|XP_002733995.1| PREDICTED: thioredoxin-dependent peroxide reductase, mitochondrial-like [Saccoglossus kowalevskii]	3e-114	69	79	4
comp2242282_c0_seq1_m.30761	3.58778	2.79012	2.84214	2.76395	2.59936	3.26371	2.75007	2.83851	ref|XP_011450032.1| PREDICTED: nascent polypeptide-associated complex subunit alpha-like [Crassostrea gigas]	9e-75	80	89	1
comp2242407_c0_seq1_m.30845	0.888075	1.02817	1.22302	0.793385	0.604851	0.467111	1.07798	0.825943	NA	NA	NA	NA	NA
comp2242933_c0_seq1_m.31351	2.58507	2.42947	2.37966	7.97809	9.67476	3.8071	2.15129	2.0502	ref|XP_014770637.1| PREDICTED: sarcoplasmic calcium-binding proteins I, III, and IV-like [Octopus bimaculoides]	2e-73	60	79	1
comp2243632_c0_seq1_m.31907	1.75975	1.54564	1.66119	1.88888	1.96214	2.04763	1.55173	1.62656	ref|XP_013404233.1| PREDICTED: electron transfer flavoprotein subunit beta-like [Lingula anatina]	1e-136	80	91	0
comp2243933_c0_seq1_m.32211	3.12836	2.20829	2.41793	2.40308	2.29177	2.81422	2.23832	1.88904	gb|ELU14393.1| hypothetical protein CAPTEDRAFT_176878 [Capitella teleta]	3e-104	87	94	0
comp2244716_c0_seq1_m.32883	2.15112	3.06386	2.88731	2.45711	2.43692	1.84016	2.61857	2.15889	ref|XP_009021809.1| hypothetical protein HELRODRAFT_157417 [Helobdella robusta] gb|ESO00035.1| hypothetical protein HELRODRAFT_157417 [Helobdella robusta]	2e-102	78	90	1
comp2244968_c0_seq1_m.33120	3.98623	3.97841	4.78063	6.19872	5.66733	2.59445	3.36615	2.91754	ref|XP_002057775.1| Thioredoxin-2 [Drosophila virilis] gb|EDW57848.1| Thioredoxin-2 [Drosophila virilis]	1e-32	61	73	0
comp2245014_c0_seq2_m.33157	4.52685	2.59012	3.00243	4.67401	4.6335	6.28607	2.87839	3.25163	gb|AHB62385.1| prohormone-3 neuropeptide precursor [Platynereis dumerilii]	6e-109	100	100	0
comp2245053_c0_seq1_m.33185	0.283643	0.39014	0.320751	0.264933	0.231906	0.253355	0.397774	0.348437	gb|EYB95032.1| hypothetical protein Y032_0164g3524 [Ancylostoma ceylanicum]	4e-12	27	47	9
comp2245687_c1_seq1_m.33822	0.494329	0.661016	0.630139	0.617774	0.668383	0.638655	0.733968	0.815154	ref|XP_012941843.1| PREDICTED: uncharacterized protein LOC101858907 [Aplysia californica]	5e-05	24	45	10
comp2245721_c0_seq1_m.33844	0.407868	0.414669	0.415899	0.590429	0.548973	0.608579	0.403012	0.426803	gb|ELU14596.1| hypothetical protein CAPTEDRAFT_180550 [Capitella teleta]	5e-21	38	58	2
comp2245960_c0_seq1_m.34133	0.71315	0.784608	0.784063	0.66119	0.626562	NA	NA	NA	NA	NA	NA	NA	NA
comp2246119_c0_seq1_m.34306	0.240515	0.301795	0.280305	0.304421	0.307484	0.299949	0.282778	0.27812	ref|XP_013379566.1| PREDICTED: proteasome subunit beta type-3-like [Lingula anatina]	2e-117	85	94	0
comp2246502_c0_seq1_m.34680	3.25786	2.64816	2.78603	3.21858	3.37105	3.80873	2.27898	2.56812	ref|XP_011424053.1| PREDICTED: myosin-2 essential light chain-like [Crassostrea gigas] gb|AEF33432.1| myosin essential light chain [Crassostrea ariakensis]	9e-70	73	88	0
comp2246514_c1_seq1_m.34691	3.64226	2.79474	3.00246	2.55749	2.56981	3.10126	2.56413	2.85552	gb|ELT96552.1| hypothetical protein CAPTEDRAFT_227190 [Capitella teleta]	6e-49	67	86	1
comp2247098_c0_seq1_m.35275	1.24271	1.37823	1.60133	0.864302	0.763921	0.457014	1.07719	0.981467	ref|XP_009065267.1| hypothetical protein LOTGIDRAFT_229629 [Lottia gigantea] gb|ESO84141.1| hypothetical protein LOTGIDRAFT_229629 [Lottia gigantea]	3e-05	28	47	4
comp2247176_c0_seq3_m.35337	0.517551	0.422189	0.441895	0.658812	0.450311	0.488501	0.299564	0.290683	NA	NA	NA	NA	NA
comp2247229_c0_seq1_m.35389	1.88706	1.86557	1.91068	2.25232	2.2105	1.47508	1.65898	1.64853	ref|XP_013393501.1| PREDICTED: proteasome subunit alpha type-1-like [Lingula anatina]	9e-155	83	93	0
comp2247988_c0_seq1_m.36173	1.5747	0.98474	1.03295	0.680517	0.746516	1.52484	1.08225	1.24382	gb|EKC22564.1| Protein disulfide-isomerase A4 [Crassostrea gigas]	9e-50	50	70	1
comp2248226_c3_seq1_m.36365	9.14286	9.18144	9.525	11.0147	11.2554	5.68459	7.64927	7.53742	gb|ELU15616.1| hypothetical protein CAPTEDRAFT_148920 [Capitella teleta]	2e-157	78	89	0
comp2248254_c1_seq2_m.36433	0.897282	1.20223	1.01951	1.22269	1.27695	0.919531	1.18256	1.03966	ref|XP_012662929.1| PREDICTED: tubulin alpha-1C chain-like, partial [Otolemur garnettii]	9e-88	96	100	0
comp2248291_c0_seq1_m.36455	1.49647	1.30795	1.2775	1.34283	1.33226	1.38295	1.08436	1.14404	ref|XP_013408072.1| PREDICTED: protein SEC13 homolog [Lingula anatina]	4e-153	81	90	0
comp2248808_c0_seq2_m.37043	14.6563	8.79603	12.3762	7.67204	7.8307	8.77442	8.41401	9.41794	dbj|BAB18897.1| troponin C [Perinereis vancaurica tetradentata] dbj|BAB18898.1| troponin C [Perinereis vancaurica tetradentata]	9e-79	90	96	0
comp2248821_c1_seq2_m.37050	2.02407	1.5258	1.50728	1.54703	1.40953	2.51266	1.58333	2.05498	ref|XP_011159196.1| PREDICTED: 1,2-dihydroxy-3-keto-5-methylthiopentene dioxygenase isoform X1 [Solenopsis invicta] gb|EFZ18588.1| hypothetical protein SINV_10573, partial [Solenopsis invicta]	3e-67	57	76	1
comp2249005_c0_seq2_m.37257	11.4479	13.9078	15.0129	13.0891	13.4334	10.2901	14.3018	14.0853	ref|XP_013413192.1| PREDICTED: fructose-bisphosphate aldolase-like [Lingula anatina]	0	78	86	0
comp2249227_c0_seq1_m.37479	2.22402	1.69415	1.7983	2.1988	2.25284	2.26351	1.32749	1.4755	gb|ELU18703.1| hypothetical protein CAPTEDRAFT_166040 [Capitella teleta]	2e-86	69	87	0
comp2250201_c0_seq1_m.38525	1.76359	2.20912	2.13915	1.86572	1.875	1.82669	1.99486	1.71255	gb|ELU11834.1| hypothetical protein CAPTEDRAFT_188642 [Capitella teleta]	1e-101	51	69	7
comp2250281_c0_seq1_m.38657	4.07825	3.75815	3.59096	4.34995	4.45902	3.84135	3.44282	3.51179	ref|XP_009028610.1| hypothetical protein HELRODRAFT_194138 [Helobdella robusta] gb|ESN93342.1| hypothetical protein HELRODRAFT_194138 [Helobdella robusta]	1e-115	55	72	0
comp2250470_c0_seq1_m.38949	7.55956	7.8979	7.10982	9.25705	7.90451	5.51645	6.82895	5.74356	gb|ADC80504.1| peptidyl prolyl cis-trans isomerase A (I) [Conus novaehollandiae]	1e-80	82	89	0
comp2250533_c0_seq1_m.39039	2.85613	2.8172	2.76541	2.3974	2.4132	2.37999	2.65001	2.54554	ref|XP_013092975.1| PREDICTED: T-complex protein 1 subunit beta-like [Biomphalaria glabrata]	0	81	91	0
comp2250550_c1_seq1_m.39064	2.12907	2.23184	2.43635	2.12991	1.62626	1.48544	2.47847	2.55721	ref|XP_001626280.1| predicted protein [Nematostella vectensis] gb|EDO34180.1| predicted protein [Nematostella vectensis]	3e-39	42	58	4
comp2250982_c0_seq1_m.39507	0.553835	0.696634	0.647493	0.630839	0.643165	0.4523	0.779846	0.720152	ref|XP_013405237.1| PREDICTED: S-formylglutathione hydrolase-like [Lingula anatina]	1e-160	79	92	1
comp2251346_c0_seq1_m.39994	3.3127	3.03212	3.04371	2.75288	2.74286	2.85164	2.97554	2.73744	gb|ABW23214.1| ribosomal protein rpl8 [Eurythoe complanata]	2e-157	89	95	1
comp2251386_c0_seq2_m.40044	4.70633	3.41687	3.82143	4.77633	4.21242	4.12909	3.14213	3.21003	gb|AHE13888.1| Cu-Zn superoxide dismutase 2 [Perinereis nuntia]	3e-87	87	96	0
comp2251594_c0_seq1_m.40214	3.37797	3.06191	3.02124	4.24339	3.69084	3.38778	2.84132	3.1071	gb|ELU00552.1| hypothetical protein CAPTEDRAFT_227092 [Capitella teleta]	7e-25	48	66	1
comp2251806_c0_seq1_m.40480	1.85146	1.46986	1.56674	2.14301	1.81502	1.36921	1.20339	1.19892	gb|ELU12067.1| hypothetical protein CAPTEDRAFT_20975 [Capitella teleta]	6e-58	69	84	1
comp2252059_c0_seq1_m.40786	8.30232	10.0774	10.2874	10.072	10.6349	5.81901	10.1153	8.75693	ref|XP_013378831.1| PREDICTED: phosphoglycerate kinase 1-like [Lingula anatina] ref|XP_013384841.1| PREDICTED: phosphoglycerate kinase 1-like [Lingula anatina]	0	79	88	0
comp2252186_c0_seq3_m.40915	0.913983	0.615061	0.713271	1.1895	1.11582	0.769759	0.780311	0.621371	ref|XP_780862.3| PREDICTED: calmodulin [Strongylocentrotus purpuratus]	7e-84	72	80	7
comp2252285_c0_seq2_m.41107	6.04619	4.40025	4.40051	4.42755	4.18401	5.43432	4.21355	4.90124	gb|ELT93758.1| hypothetical protein CAPTEDRAFT_170758 [Capitella teleta]	8e-64	64	81	0
comp2252506_c0_seq1_m.41372	0.574687	0.574782	0.587391	0.531839	0.452452	0.281887	0.499162	0.50643	NA	NA	NA	NA	NA
comp2252746_c0_seq1_m.41651	5.59869	4.0281	4.44627	4.61649	4.40103	6.00618	3.80691	3.68999	gb|AIU94834.1| 60S ribosomal protein [Phragmatopoma lapidosa] gb|AIU94836.1| 60S ribosomal protein [Phragmatopoma lapidosa]	1e-91	73	86	0
comp2252847_c0_seq1_m.41763	1.21475	1.67344	1.54616	1.64484	1.61202	1.07727	1.61444	1.54746	ref|XP_014774168.1| PREDICTED: NADH dehydrogenase [ubiquinone] 1 alpha subcomplex subunit 9, mitochondrial-like [Octopus bimaculoides] gb|KOF86092.1| hypothetical protein OCBIM_22019273mg [Octopus bim	2e-156	60	78	2
comp2253077_c0_seq1_m.42045	0.357756	0.435175	0.40586	0.398406	0.420416	0.425001	0.429169	0.457968	ref|XP_009018686.1| hypothetical protein HELRODRAFT_157135 [Helobdella robusta] gb|ESO02993.1| hypothetical protein HELRODRAFT_157135 [Helobdella robusta]	0	86	93	0
comp2253149_c0_seq1_m.42245	1.45144	1.73084	1.73262	2.07958	2.03785	1.39657	1.90761	1.70944	gb|KHN80043.1| Glutathione S-transferase 1 [Toxocara canis]	2e-46	46	62	0
comp2253217_c0_seq2_m.42336	1.02867	0.671933	0.844623	0.949195	0.879696	0.747181	0.594529	0.825214	ref|XP_014678219.1| PREDICTED: group XIIA secretory phospholipase A2-like isoform X2 [Priapulus caudatus]	5e-16	35	52	3
comp2253516_c0_seq4_m.42708	27.7883	26.8045	34.9066	14.2361	15.0281	21.7971	31.4152	35.4007	gb|ELU06641.1| hypothetical protein CAPTEDRAFT_220132 [Capitella teleta]	7e-44	52	66	11
comp2253856_c0_seq1_m.43254	0.903872	0.585195	0.656201	0.849921	0.726294	NA	NA	NA	ref|XP_009064721.1| hypothetical protein LOTGIDRAFT_196574 [Lottia gigantea] gb|ESO84518.1| hypothetical protein LOTGIDRAFT_196574 [Lottia gigantea]	4e-11	44	62	8
comp2253875_c0_seq1_m.43271	2.58571	3.61674	3.69342	3.2514	3.12235	2.95137	3.91928	3.22584	gb|AHB33642.1| 40S ribosomal protein S9 [Platynereis dumerilii]	2e-122	100	100	0
comp2254167_c0_seq1_m.43587	3.89173	4.9348	4.56498	6.85347	6.4307	4.20961	5.10197	4.80013	gb|ELT92962.1| hypothetical protein CAPTEDRAFT_224953 [Capitella teleta]	3e-98	57	74	2
comp2254206_c0_seq1_m.43646	6.51956	6.68088	6.32106	8.64849	8.15186	6.83581	6.84068	6.2665	emb|CAX73441.1| Calpain B [Schistosoma japonicum]	1e-101	37	56	10
comp2254346_c0_seq1_m.43876	1.27285	2.29265	2.36389	1.48862	1.54353	1.59681	3.21262	3.24944	NA	NA	NA	NA	NA
comp2254376_c0_seq1_m.43911	2.39517	2.9184	2.72012	2.32146	2.33069	2.23372	2.4455	2.39957	gb|ELT98597.1| hypothetical protein CAPTEDRAFT_165983 [Capitella teleta]	0	81	91	1
comp2254394_c0_seq2_m.43926	4.36325	3.42923	3.84016	3.81751	3.51282	2.34389	3.17094	3.63682	ref|XP_780677.2| PREDICTED: elongation factor 1-delta-like isoform X1 [Strongylocentrotus purpuratus]	1e-57	48	64	9
comp2254418_c0_seq1_m.43945	1.80115	1.5713	1.68443	1.81513	1.95921	1.79397	1.3765	1.30442	ref|XP_014665707.1| PREDICTED: cytochrome b-c1 complex subunit 7-like [Priapulus caudatus]	6e-37	58	74	0
comp2254426_c0_seq1_m.43954	7.09358	5.30252	5.45704	5.53129	5.2501	9.56557	4.82861	5.74775	ref|XP_014679702.1| PREDICTED: far upstream element-binding protein 2-like [Priapulus caudatus]	2e-10	36	52	19
comp2254456_c0_seq2_m.43993	5.94747	7.75613	6.86201	5.55492	5.42442	5.22704	7.46953	6.40394	ref|XP_009017909.1| hypothetical protein HELRODRAFT_99776 [Helobdella robusta] gb|ESO03973.1| hypothetical protein HELRODRAFT_99776 [Helobdella robusta]	3e-96	46	63	8
comp2254470_c0_seq1_m.44006	3.39545	3.28652	3.24899	2.54984	2.61388	2.89484	3.68775	3.23102	gb|EKC35325.1| Titin [Crassostrea gigas]	8e-150	45	62	5
comp2254477_c0_seq1_m.44015	1.54836	1.36633	1.48135	2.06443	2.16834	1.9717	1.49977	1.48831	ref|XP_011422530.1| PREDICTED: lactoylglutathione lyase-like [Crassostrea gigas] gb|EKC29441.1| Lactoylglutathione lyase [Crassostrea gigas]	7e-89	73	85	1
comp2254520_c0_seq1_m.44059	6.28648	4.38483	4.08659	4.29294	4.10165	4.26241	3.52632	3.78666	ref|XP_013779654.1| PREDICTED: heterogeneous nuclear ribonucleoprotein A1, A2/B1 homolog [Limulus polyphemus]	6e-77	69	85	2
comp2254568_c0_seq1_m.44123	0.809149	0.733262	0.66718	0.664751	0.606505	NA	NA	NA	ref|XP_013789637.1| PREDICTED: neogenin-like, partial [Limulus polyphemus]	1e-16	36	54	12
comp2254641_c1_seq1_m.44200	1.86335	1.31684	1.43383	1.35196	1.15249	1.82348	1.22218	1.2362	NA	NA	NA	NA	NA
comp2254675_c0_seq1_m.44244	4.64717	3.56253	3.5821	4.86531	3.58248	4.35927	3.1428	3.23357	gb|ELU00552.1| hypothetical protein CAPTEDRAFT_227092 [Capitella teleta]	4e-25	45	60	1
comp2256041_c0_seq1_m.46046	2.04381	3.14417	2.77604	4.05972	4.25191	2.17177	3.06217	2.86463	gb|AGC12566.1| Gq [Platynereis dumerilii]	0	98	99	0
comp2256095_c0_seq1_m.46136	0.379506	0.36865	0.336063	0.273234	0.248323	NA	NA	NA	NA	NA	NA	NA	NA
comp2256220_c0_seq1_m.46316	1.31395	1.21254	1.17262	0.834326	0.81936	1.12534	1.27898	1.23377	ref|XP_013094649.1| PREDICTED: titin-like isoform X2 [Biomphalaria glabrata]	6e-104	43	62	1
comp2256245_c0_seq1_m.46340	6.91036	5.45196	5.53749	5.32353	5.16094	5.46068	5.67377	5.65985	gb|ELT94404.1| hypothetical protein CAPTEDRAFT_173258 [Capitella teleta]	6e-30	31	49	2
comp2256252_c0_seq1_m.46348	0.47369	0.773323	0.834069	0.405536	0.352509	0.692947	0.947016	1.04847	ref|XP_012938052.1| PREDICTED: nucleolin-like isoform X3 [Aplysia californica]	2e-50	41	59	15
comp2257070_c0_seq2_m.47513	5.90575	7.84581	7.5633	4.78996	4.73684	5.08629	8.06554	8.9232	emb|CAB38180.1| cytoplasmic intermediate filament protein [Phascolion strombus]	3e-163	70	87	0
comp2257070_c0_seq2_m.47512	94.7044	161.726	145.38	71.5729	64.0611	70.427	170.535	150.529	emb|CAB38180.1| cytoplasmic intermediate filament protein [Phascolion strombus]	3e-163	70	87	0
comp2257282_c0_seq1_m.47769	3.80217	3.20668	3.34005	3.78082	3.56839	3.62214	3.01834	3.4199	ref|XP_011432365.1| PREDICTED: neurogenic locus protein delta-like isoform X2 [Crassostrea gigas]	1e-32	37	50	4
comp2257395_c0_seq4_m.47951	0.482937	1.31227	1.17143	0.394468	0.393738	1.1717	1.3432	1.2482	NA	NA	NA	NA	NA
comp2257585_c0_seq1_m.48216	1.49466	2.47926	2.29081	1.8204	1.7339	1.32603	2.55561	2.27299	ref|XP_009023312.1| hypothetical protein HELRODRAFT_84353 [Helobdella robusta] gb|ESN98561.1| hypothetical protein HELRODRAFT_84353 [Helobdella robusta]	4e-112	75	88	3
comp2257601_c0_seq2_m.48241	10.2859	8.93617	8.72137	8.34754	8.80304	8.7979	8.57299	8.01186	gb|EEZ97818.1| hypothetical protein TcasGA2_TC000185 [Tribolium castaneum]	0	72	87	1
comp2257633_c0_seq1_m.48279	3.72006	2.71116	2.76664	3.44291	3.15063	3.23171	2.30481	2.40978	ref|XP_015192768.1| PREDICTED: UV excision repair protein RAD23 homolog B isoform X3 [Lepisosteus oculatus]	9e-60	47	60	18
comp2257674_c0_seq1_m.48339	0.0482309	0.124095	0.101506	0.0607116	0.0541252	0.113623	0.157711	0.138881	ref|NP_990307.2| vitamin D3 hydroxylase-associated protein [Gallus gallus]	2e-91	35	55	1
comp2257693_c0_seq3_m.48359	1.26415	1.27143	1.21759	1.47434	1.40167	1.55487	1.42078	1.34616	gb|ELU11155.1| hypothetical protein CAPTEDRAFT_224256 [Capitella teleta]	6e-14	38	54	2
comp2257781_c0_seq1_m.48513	1.28343	1.69973	1.62167	1.33941	1.3345	1.95071	1.93711	1.78105	ref|XP_014669426.1| PREDICTED: low-density lipoprotein receptor-related protein 2-like isoform X2 [Priapulus caudatus]	0	38	57	6
comp2257905_c0_seq1_m.48664	2.41455	1.31363	1.49104	1.64278	1.58037	2.12739	1.23879	1.36535	ref|XP_002594860.1| hypothetical protein BRAFLDRAFT_124447 [Branchiostoma floridae] gb|EEN50871.1| hypothetical protein BRAFLDRAFT_124447 [Branchiostoma floridae]	7e-50	75	91	0
comp2257939_c0_seq1_m.48703	3.38623	1.97467	2.37652	2.6829	2.63297	2.32011	1.87327	1.96592	ref|XP_009017134.1| hypothetical protein HELRODRAFT_135395, partial [Helobdella robusta] gb|ESO04555.1| hypothetical protein HELRODRAFT_135395, partial [Helobdella robusta]	1e-58	64	81	2
comp2258014_c0_seq1_m.48797	2.60851	2.11119	2.41397	1.64643	1.71495	2.06963	2.13842	2.3383	gb|ELT99893.1| hypothetical protein CAPTEDRAFT_225152 [Capitella teleta]	2e-28	51	63	9
comp2258193_c0_seq1_m.49089	7.48281	6.29667	7.04392	8.30238	7.9757	7.23712	6.30086	5.93799	gb|ALS04935.1| nucleoside diphosphate kinase A 1 [Pseudodiaptomus poplesia]	6e-78	76	86	0
comp2258349_c0_seq1_m.49321	1.15758	1.09518	1.0261	0.9914	0.967807	1.7534	1.15711	1.20983	NA	NA	NA	NA	NA
comp2258349_c0_seq1_m.49322	3.66364	2.98233	3.17505	2.81042	2.81861	4.48175	3.15544	3.37589	NA	NA	NA	NA	NA
comp2258554_c0_seq1_m.49568	1.77958	1.73589	1.76452	1.2561	1.28863	1.62935	1.8463	1.81179	ref|XP_012945736.1| PREDICTED: titin-like [Aplysia californica]	2e-127	38	55	3
comp2258554_c1_seq2_m.49570	1.28562	1.26069	1.23274	0.91942	0.895277	1.10631	1.28444	1.25705	ref|XP_013094648.1| PREDICTED: titin-like isoform X1 [Biomphalaria glabrata]	5e-111	44	61	2
comp2258609_c0_seq1_m.49647	2.10631	2.84277	2.69847	2.32257	2.28942	2.08394	3.39746	2.94132	ref|XP_013380988.1| PREDICTED: 60S ribosomal protein L7-like [Lingula anatina]	5e-142	76	89	0
comp2258619_c0_seq2_m.49656	0.41607	0.421415	0.451847	0.512658	0.52694	NA	NA	NA	ref|XP_005934945.1| PREDICTED: guanidinoacetate N-methyltransferase [Haplochromis burtoni]	4e-121	75	85	0
comp2258806_c0_seq1_m.49958	0.964394	1.21725	1.24532	1.18533	1.209	0.901901	1.20328	1.14994	gb|ELT99754.1| hypothetical protein CAPTEDRAFT_226862 [Capitella teleta]	8e-106	62	82	1
comp2259221_c0_seq1_m.50687	0.608281	0.840016	0.815666	0.861028	0.789141	NA	NA	NA	gb|ELU07645.1| hypothetical protein CAPTEDRAFT_162401 [Capitella teleta]	2e-126	74	87	0
comp2259349_c0_seq2_m.50877	4.1173	3.00206	3.81453	3.1482	3.05808	3.11526	2.90624	3.2356	ref|XP_011436747.1| PREDICTED: myophilin-like [Crassostrea gigas] gb|EKC20457.1| Myophilin [Crassostrea gigas]	1e-50	55	72	2
comp2259363_c0_seq16_m.50888	9.98919	12.6905	12.3461	11.4579	12.0615	9.10651	12.5591	11.0915	gb|ELU05220.1| hypothetical protein CAPTEDRAFT_180936 [Capitella teleta]	0	75	85	0
comp2259918_c0_seq1_m.51762	1.94813	1.90771	2.12701	2.3229	2.3315	1.88897	2.07328	2.01055	ref|XP_013389608.1| PREDICTED: actin-related protein 2/3 complex subunit 5-like isoform X1 [Lingula anatina]	5e-48	55	74	0
comp2259963_c0_seq1_m.51818	0.578563	0.625014	0.60078	0.509548	0.512584	0.645658	0.625167	0.604687	gb|ELT99648.1| hypothetical protein CAPTEDRAFT_163351 [Capitella teleta]	0	71	85	0
comp2260058_c0_seq1_m.51934	8.11745	6.47254	6.02468	10.553	6.77096	4.88465	5.14484	5.05757	emb|CAM91762.1| hypothetical protein [Platynereis dumerilii]	1e-119	98	99	0
comp2260103_c0_seq1_m.51994	2.50068	1.93649	1.92763	1.9713	1.97471	2.61666	1.66651	1.9041	ref|XP_013379459.1| PREDICTED: eukaryotic translation initiation factor 4H-like isoform X3 [Lingula anatina]	2e-34	76	89	0
comp2260394_c0_seq1_m.52394	9.53047	6.92547	7.38262	9.41306	9.47489	8.58595	5.57252	6.53133	ref|XP_013409592.1| PREDICTED: uncharacterized protein LOC106173136 [Lingula anatina]	6e-08	32	49	7
comp2260519_c0_seq10_m.52611	2.70419	2.28093	2.33566	2.76	2.69459	NA	NA	NA	gb|ELT91502.1| hypothetical protein CAPTEDRAFT_172037 [Capitella teleta]	3e-120	65	74	4
comp2260797_c0_seq1_m.53088	2.60866	2.20123	2.27195	2.8879	3.06736	2.86148	2.13356	2.13124	ref|XP_014245136.1| PREDICTED: myosin regulatory light chain sqh isoform X2 [Cimex lectularius]	2e-94	81	89	2
comp2260960_c0_seq2_m.53456	0.479155	0.847067	0.658078	0.711406	0.544339	NA	NA	NA	gb|ELU00694.1| hypothetical protein CAPTEDRAFT_4023 [Capitella teleta]	1e-109	90	94	0
comp2260997_c1_seq7_m.53574	1.04249	0.983356	1.02617	1.19139	1.18823	1.43304	1.08361	1.1241	ref|XP_014668079.1| PREDICTED: calcyphosin-like protein [Priapulus caudatus] ref|XP_014668081.1| PREDICTED: calcyphosin-like protein [Priapulus caudatus] ref|XP_014668082.1| PREDICTED: calcyphosin-lik	6e-64	54	73	1
comp2261018_c0_seq2_m.53614	1.46259	1.1514	1.10282	1.13954	1.09495	1.60372	1.07158	1.17286	ref|XP_013415473.1| PREDICTED: histone-binding protein RBBP7 isoform X1 [Lingula anatina]	0	95	97	0
comp2261047_c0_seq1_m.53653	1.32232	1.34889	1.31239	1.04444	1.05634	0.920014	1.0854	1.09896	ref|XP_011444269.1| PREDICTED: peptidyl-prolyl cis-trans isomerase-like [Crassostrea gigas] gb|EKC29243.1| Peptidyl-prolyl cis-trans isomerase B [Crassostrea gigas]	9e-93	63	77	0
comp2261058_c0_seq1_m.53667	1.254	1.32743	1.30578	1.48437	1.46778	1.33095	1.42521	1.29738	gb|ELT97343.1| hypothetical protein CAPTEDRAFT_123658 [Capitella teleta]	0	83	93	0
comp2261121_c0_seq1_m.53764	0.74792	0.738472	0.724407	0.881699	0.857748	NA	NA	NA	ref|XP_005108978.1| PREDICTED: probable phytanoyl-CoA dioxygenase [Aplysia californica]	2e-114	60	73	0
comp2261150_c0_seq1_m.53829	0.189922	0.25727	0.240625	0.227413	0.2156	0.286406	0.247619	0.233808	ref|XP_002739449.1| PREDICTED: glutathione S-transferase omega-like 2-like [Saccoglossus kowalevskii]	2e-164	70	83	0
comp2261183_c0_seq1_m.53867	0.492123	0.696368	0.649031	0.543978	0.503483	0.590831	0.745944	0.684254	ref|XP_014775599.1| PREDICTED: tankyrase-like protein [Octopus bimaculoides]	2e-142	32	48	15
comp2261362_c0_seq2_m.54116	0.26772	0.449537	0.39826	0.328022	0.268006	NA	NA	NA	gb|ELU07951.1| hypothetical protein CAPTEDRAFT_207262 [Capitella teleta]	1e-11	33	46	13
comp2261368_c1_seq1_m.54120	3.18189	2.89572	2.85783	2.5062	2.39388	2.82708	2.90325	2.91472	gb|ELU06805.1| hypothetical protein CAPTEDRAFT_21201 [Capitella teleta]	9e-24	39	60	15
comp2261373_c0_seq1_m.54127	9.31287	9.56419	9.01779	8.49003	8.15771	8.27083	8.39237	8.46494	ref|XP_013395930.1| PREDICTED: LOW QUALITY PROTEIN: elongation factor 1-gamma-like [Lingula anatina]	0	66	82	0
comp2261379_c0_seq1_m.54133	29.8476	20.858	28.275	18.0488	17.9757	9.70188	18.9427	17.6727	ref|XP_009018494.1| hypothetical protein HELRODRAFT_185642 [Helobdella robusta] gb|ESO03346.1| hypothetical protein HELRODRAFT_185642 [Helobdella robusta]	3e-61	68	79	0
comp2261395_c0_seq1_m.54150	0.160017	0.242586	0.267954	0.157587	0.192609	0.271803	0.254072	0.28889	dbj|BAE93516.1| regeneration-upregulated protein 5 [Enchytraeus japonensis]	2e-60	36	53	16
comp2261399_c0_seq2_m.54155	0.409461	0.386644	0.447274	0.178201	0.192133	0.321628	0.367471	0.444255	NA	NA	NA	NA	NA
comp2261428_c0_seq1_m.54200	5.54715	5.73481	5.44457	4.891	4.57108	5.94989	5.35211	5.05303	ref|XP_013389397.1| PREDICTED: 60S ribosomal protein L4-like [Lingula anatina]	0	78	91	0
comp2261623_c0_seq1_m.54431	54.8245	53.8669	61.411	33.2222	34.5242	43.1912	52.3725	50.2089	dbj|BAA33059.1| glycocyamine kinase beta chain [Hediste diversicolor]	0	92	95	0
comp2261716_c0_seq2_m.54597	4.63133	6.6617	5.81546	4.37123	4.27554	4.18909	6.13769	5.16307	gb|ELT88534.1| hypothetical protein CAPTEDRAFT_221070 [Capitella teleta]	3e-55	30	50	10
comp2261876_c0_seq1_m.54865	0.725019	1.14048	1.02084	0.565631	0.582577	0.817029	1.2402	1.26919	ref|XP_010599857.1| PREDICTED: LOW QUALITY PROTEIN: tenascin-X [Loxodonta africana]	2e-07	27	38	24
comp2261971_c0_seq1_m.55022	2.24934	2.04378	2.09571	1.71156	1.57212	2.00131	2.18151	2.205	emb|CAM91793.1| hypothetical protein [Platynereis dumerilii]	9e-41	88	90	4
comp2261980_c0_seq3_m.55041	2.14114	2.55738	2.45668	2.07385	1.87844	2.36233	2.82132	2.75482	ref|XP_010211053.1| PREDICTED: LOW QUALITY PROTEIN: deleted in malignant brain tumors 1 protein-like, partial [Tinamus guttatus]	9e-17	28	41	9
comp2262137_c0_seq3_m.92268	2.72803	2.38529	2.43379	1.08524	0.846595	1.89851	2.02137	1.94555	ref|XP_013393822.1| PREDICTED: mammalian ependymin-related protein 1-like [Lingula anatina]	4e-07	25	41	8
comp2262137_c0_seq4_m.55246	3.02345	3.45996	3.9353	1.53855	1.3658	1.90394	2.19723	1.77778	ref|XP_013400763.1| PREDICTED: mammalian ependymin-related protein 1-like [Lingula anatina]	2e-07	35	51	10
comp2262185_c0_seq1_m.55318	0.120995	0.199014	0.174292	0.163432	0.135145	0.167989	0.225651	0.197573	ref|XP_009023396.1| hypothetical protein HELRODRAFT_176905 [Helobdella robusta] gb|ESN98435.1| hypothetical protein HELRODRAFT_176905 [Helobdella robusta]	3e-13	31	50	9
comp2262197_c0_seq1_m.55346	0.626214	0.778613	0.846003	0.864787	0.831683	0.4311	0.633704	0.539283	emb|CAD91446.1| signal sequence receptor beta-like protein [Crassostrea gigas]	1e-76	63	85	0
comp2262281_c0_seq3_m.55504	0.993261	1.17263	1.20981	0.627182	0.669584	1.01256	1.45922	1.5031	gb|ERG82198.1| twitchin [Ascaris suum]	6e-16	32	50	12
comp2262300_c0_seq2_m.55547	3.52712	3.99918	4.02097	3.58527	3.48128	3.07764	3.74002	3.22941	gb|ABW23163.1| ribosomal protein rpl7a [Arenicola marina]	3e-135	82	95	0
comp2262317_c0_seq2_m.55577	0.0509055	0.0651074	0.0606656	0.0796812	0.0765074	NA	NA	NA	ref|XP_003755464.1| PREDICTED: ADP-ribosylation factor-like protein 3 [Sarcophilus harrisii]	9e-87	80	89	0
comp2262339_c0_seq1_m.55609	2.99357	2.73978	2.82673	3.88391	3.51328	3.18515	2.45849	2.41066	gb|ELU12369.1| hypothetical protein CAPTEDRAFT_165495 [Capitella teleta]	4e-149	65	78	1
comp2262360_c0_seq1_m.55644	4.79565	3.21884	4.04142	3.12928	2.94848	3.12182	2.74787	2.80492	ref|XP_013408346.1| PREDICTED: uncharacterized protein LOC106172259 [Lingula anatina]	4e-05	37	55	12
comp2262441_c0_seq1_m.55760	3.75833	3.05089	3.24423	3.41962	3.3653	3.02883	2.61739	2.68262	gb|ELU08519.1| hypothetical protein CAPTEDRAFT_158600 [Capitella teleta]	4e-90	78	86	0
comp2262465_c0_seq5_m.55795	0.73092	0.683374	0.80718	0.349914	0.358994	0.45612	0.712099	0.862102	gb|ELU08680.1| hypothetical protein CAPTEDRAFT_217795, partial [Capitella teleta]	3e-07	56	71	2
comp2262720_c0_seq1_m.56199	1.27236	1.61072	1.50695	1.48521	1.49434	1.14866	1.48893	1.59467	gb|ELU09965.1| hypothetical protein CAPTEDRAFT_153099 [Capitella teleta]	2e-42	60	78	0
comp2262731_c0_seq1_m.56213	1.92981	3.14066	2.79653	1.89961	1.7574	1.89036	3.44282	2.78064	gb|ELU03977.1| hypothetical protein CAPTEDRAFT_20933 [Capitella teleta]	2e-86	75	86	0
comp2262740_c0_seq13_m.56232	12.189	13.8117	12.7556	11.5047	11.4634	12.909	14.3598	12.2601	gb|ELU07066.1| hypothetical protein CAPTEDRAFT_164235 [Capitella teleta]	0	73	88	0
comp2262927_c0_seq2_m.56544	2.06612	2.33692	2.41699	2.58617	2.52715	1.70849	2.35205	2.1855	gb|ELU05060.1| hypothetical protein CAPTEDRAFT_166194 [Capitella teleta]	2e-170	71	82	4
comp2263073_c0_seq1_m.56786	0.589804	0.68615	0.691081	0.686369	0.659048	0.988565	0.666702	0.687118	ref|XP_002737882.1| PREDICTED: coiled-coil-helix-coiled-coil-helix domain-containing protein 3, mitochondrial-like [Saccoglossus kowalevskii]	2e-23	35	61	3
comp2263115_c0_seq2_m.56831	0.164283	0.283861	0.260836	0.224549	0.210739	0.227286	0.297207	0.276382	ref|XP_013406158.1| PREDICTED: ras-related protein Rab-5C-like [Lingula anatina]	2e-126	89	93	0
comp2263250_c0_seq1_m.57052	9.59376	7.50199	7.51456	8.88864	8.44643	6.46173	5.33869	5.24015	ref|XP_013388478.1| PREDICTED: calmodulin-like protein 3 [Lingula anatina]	1e-25	45	63	1
comp2263277_c0_seq1_m.57091	1.03711	0.98046	0.918156	0.755187	0.756761	1.45266	1.2459	1.22833	gb|KFM77690.1| Glutamine synthetase 2 cytoplasmic, partial [Stegodyphus mimosarum]	0	66	79	0
comp2263291_c0_seq2_m.57114	3.80496	3.75981	3.65069	6.36107	5.52357	2.95474	3.68415	3.25293	gb|AAR27011.1| cysteine protease [Periserrula leucophryna]	5e-170	85	91	0
comp2263346_c1_seq31_m.57192	1.9437	1.47332	1.45094	1.48042	1.56482	1.88527	1.39175	1.47255	gb|ABO93208.1| Elav [Platynereis dumerilii]	0	99	99	0
comp2263347_c0_seq2_m.57195	0.885523	0.931209	0.946349	1.08044	1.1113	NA	NA	NA	ref|XP_013404769.1| PREDICTED: isocitrate dehydrogenase [NAD] subunit gamma, mitochondrial-like isoform X1 [Lingula anatina]	1e-151	66	78	1
comp2263394_c0_seq1_m.57263	0.327316	0.472095	0.487617	0.360671	0.340869	0.244358	0.417756	0.338115	gb|ELT98936.1| hypothetical protein CAPTEDRAFT_165873, partial [Capitella teleta]	3e-145	69	86	0
comp2263508_c0_seq1_m.57408	3.39594	5.02278	4.71319	3.98697	3.86155	3.17619	4.92644	4.28627	gb|ABB29594.1| ribosomal protein P0 large subunit [Platynereis dumerilii]	2e-165	100	100	0
comp2263612_c1_seq1_m.57550	1.10077	0.874418	0.939012	0.785393	0.826157	1.31036	0.827043	0.902743	ref|XP_002118074.1| hypothetical protein TRIADDRAFT_62104 [Trichoplax adhaerens] gb|EDV19474.1| hypothetical protein TRIADDRAFT_62104 [Trichoplax adhaerens]	9e-30	34	51	13
comp2263658_c0_seq3_m.57592	0.855007	0.91542	0.890013	0.681164	0.726137	0.871507	1.0066	0.94452	ref|XP_011444269.1| PREDICTED: peptidyl-prolyl cis-trans isomerase-like [Crassostrea gigas] gb|EKC29243.1| Peptidyl-prolyl cis-trans isomerase B [Crassostrea gigas]	3e-90	65	81	0
comp2263661_c0_seq1_m.57595	4.56894	4.46129	4.36793	3.82079	3.70877	3.72662	4.02796	4.03438	ref|XP_013391205.1| PREDICTED: proliferation-associated protein 2G4-like [Lingula anatina]	2e-157	74	87	0
comp2263667_c0_seq1_m.57601	0.808103	0.896293	0.913503	1.231	1.2158	NA	NA	NA	gb|ELU03645.1| hypothetical protein CAPTEDRAFT_186204 [Capitella teleta]	1e-91	79	85	2
comp2263691_c0_seq2_m.57661	0.794436	0.635304	0.631874	0.568578	0.551974	1.06246	0.658282	0.749431	ref|XP_005090113.1| PREDICTED: glucosidase 2 subunit beta-like isoform X1 [Aplysia californica]	4e-146	47	62	3
comp2263768_c0_seq2_m.57843	3.19135	2.62701	2.85808	2.50399	2.3799	2.63045	2.80166	2.93657	ref|XP_005488714.2| PREDICTED: hsc70-interacting protein [Zonotrichia albicollis]	1e-75	56	74	1
comp2263771_c0_seq2_m.57851	1.63594	2.0277	1.8046	1.90201	1.89236	1.51805	2.19676	1.96816	gb|ELU18519.1| hypothetical protein CAPTEDRAFT_168189 [Capitella teleta]	0	92	97	0
comp2263787_c0_seq3_m.57874	0.910574	1.02284	1.04535	1.15908	1.01045	0.563923	1.01266	1.02416	NA	NA	NA	NA	NA
comp2263822_c0_seq1_m.57945	2.15624	2.663	2.49829	3.71352	3.52876	2.32898	2.95462	2.54303	gb|ELU14596.1| hypothetical protein CAPTEDRAFT_180550 [Capitella teleta]	3e-58	41	55	11
comp2263873_c0_seq9_m.58029	5.91631	7.72663	7.58771	2.95708	2.41651	4.29603	3.92798	2.38999	ref|XP_009058449.1| hypothetical protein LOTGIDRAFT_233585 [Lottia gigantea] gb|ESO90793.1| hypothetical protein LOTGIDRAFT_233585 [Lottia gigantea]	3e-08	29	44	11
comp2263896_c0_seq3_m.58065	1.88671	1.86364	1.96143	2.5109	2.55274	2.30086	1.69201	2.14408	gb|ELU04699.1| hypothetical protein CAPTEDRAFT_222963 [Capitella teleta]	5e-171	76	87	2
comp2263909_c0_seq2_m.58087	6.28225	7.08177	6.955	5.8336	5.778	5.22096	6.92559	6.51346	ref|XP_011442101.1| PREDICTED: 60S ribosomal protein L5-like [Crassostrea gigas]	1e-123	72	86	1
comp2263921_c0_seq2_m.58101	0.282461	0.417253	0.338532	0.250526	0.25655	NA	NA	NA	gb|ELU04271.1| hypothetical protein CAPTEDRAFT_221804 [Capitella teleta]	4e-14	33	46	11
comp2263928_c0_seq2_m.58107	1.95923	1.94919	2.12971	3.1378	2.47449	2.2318	1.8442	1.62601	gb|AIZ77505.1| legumain-protease-precursor [Platynereis dumerilii]	0	99	100	0
comp2263983_c0_seq1_m.58208	1.22732	1.44671	1.42381	1.45137	1.38929	1.2115	1.33782	1.31521	ref|XP_009065531.1| hypothetical protein LOTGIDRAFT_132853 [Lottia gigantea] gb|ESO83745.1| hypothetical protein LOTGIDRAFT_132853 [Lottia gigantea]	7e-122	75	88	0
comp2264022_c0_seq13_m.58310	0.695256	0.885766	1.01339	0.878338	0.791205	0.708254	0.959024	0.885924	ref|XP_008291875.1| PREDICTED: deoxynucleoside triphosphate triphosphohydrolase SAMHD1 isoform X2 [Stegastes partitus]	4e-113	40	57	15
comp2264066_c0_seq3_m.58370	1.63547	1.3938	1.46068	1.25636	1.23824	1.25434	1.37179	1.47525	gb|ELU07245.1| hypothetical protein CAPTEDRAFT_27818, partial [Capitella teleta]	8e-40	52	71	2
comp2264121_c0_seq1_m.58459	0.601901	0.77493	0.833892	0.827441	0.77524	NA	NA	NA	ref|XP_009019765.1| hypothetical protein HELRODRAFT_188672 [Helobdella robusta] gb|ESO02357.1| hypothetical protein HELRODRAFT_188672 [Helobdella robusta]	1e-52	46	61	4
comp2264302_c0_seq2_m.58699	1.90025	1.23986	1.36928	1.17863	1.16966	1.78923	1.0606	1.27122	gb|ACY92666.1| tectonic-like protein [Saccoglossus kowalevskii]	1e-130	39	58	4
comp2264621_c0_seq1_m.59138	1.02236	0.814162	0.723313	0.697814	0.709867	1.02509	0.749779	0.772656	gb|ELU08756.1| hypothetical protein CAPTEDRAFT_165342 [Capitella teleta]	7e-70	58	69	5
comp2264743_c0_seq3_m.59295	4.98539	5.00846	4.82554	4.232	3.97657	5.11392	5.00194	4.79269	gb|ELU03449.1| hypothetical protein CAPTEDRAFT_180856 [Capitella teleta]	0	77	87	0
comp2264838_c0_seq3_m.59436	2.16591	0.814136	0.827686	1.1111	1.03474	1.64756	0.686856	0.82037	ref|XP_014776436.1| PREDICTED: chromobox protein homolog 1-like isoform X1 [Octopus bimaculoides] gb|KOF82764.1| hypothetical protein OCBIM_22024787mg [Octopus bimaculoides]	6e-60	77	88	5
comp2264888_c0_seq4_m.59493	0.986238	1.5875	1.38676	1.50065	1.23607	0.748228	1.71904	1.59263	ref|XP_007522261.1| PREDICTED: tubulin beta-2B chain isoform X2 [Erinaceus europaeus]	6e-126	93	98	0
comp2265049_c0_seq3_m.59764	1.003	1.6009	1.71785	1.53744	1.36031	1.01775	1.90017	1.84325	ref|XP_002737692.1| PREDICTED: dehydrogenase/reductase SDR family member 11-like [Saccoglossus kowalevskii]	5e-41	49	67	1
comp2265077_c0_seq1_m.59810	5.45481	4.67745	5.19273	5.93712	5.91314	4.26139	4.23014	4.50338	ref|XP_009017290.1| hypothetical protein HELRODRAFT_185576 [Helobdella robusta] gb|ESO04711.1| hypothetical protein HELRODRAFT_185576 [Helobdella robusta]	1e-85	67	78	3
comp2265255_c2_seq1_m.60100	5.83645	7.90582	7.51683	6.26031	5.34813	5.99157	7.98018	7.35319	gb|ELT95811.1| hypothetical protein CAPTEDRAFT_79363, partial [Capitella teleta]	4e-16	40	60	1
comp2265326_c0_seq3_m.60204	4.39213	4.79674	4.94517	2.56862	2.7423	3.56273	5.17013	3.97598	ref|XP_009094533.1| PREDICTED: fatty acid-binding protein, intestinal [Serinus canaria]	5e-09	35	50	6
comp2265328_c0_seq2_m.60206	1.66778	1.38021	1.36338	1.50086	1.63079	3.11068	1.36562	1.48927	gb|ELU05671.1| hypothetical protein CAPTEDRAFT_229021 [Capitella teleta]	2e-67	32	49	10
comp2265370_c0_seq1_m.60276	4.91008	4.04229	4.30807	4.63102	4.56888	4.95585	3.8733	4.35604	ref|XP_011412372.1| PREDICTED: dynactin subunit 2-like isoform X1 [Crassostrea gigas] ref|XP_011412440.1| PREDICTED: dynactin subunit 2-like isoform X2 [Crassostrea gigas] ref|XP_011412519.1| PREDICTE	6e-152	57	76	1
comp2265386_c0_seq2_m.60299	1.92609	1.91133	2.18687	3.01971	2.79906	1.41696	1.95742	1.76883	gb|ELT97538.1| hypothetical protein CAPTEDRAFT_176086 [Capitella teleta]	6e-27	32	54	4
comp2265462_c0_seq5_m.60462	1.5399	1.33373	1.30191	1.39314	1.30259	1.51782	1.11491	1.19414	ref|XP_013391089.1| PREDICTED: tumor protein D54-like isoform X4 [Lingula anatina]	1e-43	45	64	9
comp2265464_c0_seq1_m.60472	3.37365	2.52399	2.49916	3.12027	3.01169	3.95203	2.46713	2.52304	gb|EJW82612.1| collagen alpha-6(IV) chain [Wuchereria bancrofti]	1e-129	66	72	6
comp2265471_c0_seq5_m.60488	2.71901	3.53002	3.29416	3.30367	3.24928	2.02871	3.55204	3.20959	gb|ELU16240.1| hypothetical protein CAPTEDRAFT_171654 [Capitella teleta]	8e-119	53	69	2
comp2265494_c0_seq1_m.60519	0.914448	0.987836	1.11739	1.35703	1.21163	0.66517	0.942458	0.751772	gb|ELT96308.1| hypothetical protein CAPTEDRAFT_153835 [Capitella teleta]	2e-120	96	99	0
comp2265589_c0_seq2_m.60673	2.23717	1.92063	2.02656	2.66626	2.65274	2.21773	1.99223	1.95336	gb|ELT98852.1| hypothetical protein CAPTEDRAFT_172328 [Capitella teleta]	2e-44	52	71	10
comp2265656_c0_seq3_m.60780	0.931012	1.6515	1.32543	0.680945	0.66376	0.858544	1.88862	1.22921	gb|KPP74689.1| intestinal-type alkaline phosphatase 1-like, partial [Scleropages formosus]	0	42	57	10
comp2265703_c0_seq1_m.60844	1.49871	1.11186	1.14163	1.30913	1.34592	1.13418	0.782902	0.833137	ref|XP_014767700.1| PREDICTED: THO complex subunit 4-like isoform X2 [Octopus bimaculoides] gb|KOF95182.1| hypothetical protein OCBIM_22039276mg [Octopus bimaculoides]	2e-47	67	80	3
comp2265735_c0_seq4_m.60895	4.54371	4.20541	4.15491	3.67844	3.84	4.41916	4.33569	4.44852	ref|XP_009027823.1| hypothetical protein HELRODRAFT_115162 [Helobdella robusta] gb|ESN94086.1| hypothetical protein HELRODRAFT_115162 [Helobdella robusta]	0	67	81	0
comp2265768_c0_seq2_m.60943	2.64643	1.60538	1.65925	1.63845	1.57894	2.02021	1.11934	1.29671	ref|XP_013068105.1| PREDICTED: Y-box factor homolog [Biomphalaria glabrata]	3e-47	88	91	4
comp2265883_c1_seq1_m.61140	0.436264	0.666311	0.544636	0.698872	0.63434	0.413809	0.634801	0.65083	ref|XP_014780546.1| PREDICTED: tubulin beta-4B chain [Octopus bimaculoides] gb|KOF77031.1| hypothetical protein OCBIM_22032594mg [Octopus bimaculoides]	0	97	98	0
comp2265885_c0_seq3_m.61143	0.946718	1.02384	1.24597	0.685753	0.823046	1.08336	1.32026	1.06356	ref|XP_013410125.1| PREDICTED: uncharacterized protein LOC106173519 isoform X1 [Lingula anatina]	1e-37	34	53	4
comp2265897_c0_seq5_m.61166	1.32654	1.55763	1.61677	2.12379	2.18358	1.82253	1.41279	1.36713	ref|XP_014789608.1| PREDICTED: ras-related protein Ral-A-like isoform X2 [Octopus bimaculoides] gb|KOF63349.1| hypothetical protein OCBIM_22019372mg [Octopus bimaculoides]	3e-107	80	87	3
comp2265923_c0_seq1_m.61202	12.7611	13.6996	13.1905	10.26	10.3525	10.7655	11.9152	12.2448	gb|ACZ97018.1| heat shock protein 90 [Phascolosoma esculenta]	0	82	91	0
comp2266171_c0_seq1_m.61557	2.04059	2.1944	2.20696	3.17089	2.98593	1.60329	2.20287	2.05545	emb|CDQ84798.1| unnamed protein product [Oncorhynchus mykiss]	2e-101	48	68	1
comp2266233_c0_seq1_m.61658	1.10049	1.81976	1.53432	1.42161	1.42927	1.40283	1.59669	1.3757	NA	NA	NA	NA	NA
comp2266280_c0_seq1_m.61789	1.38673	1.46391	1.52671	2.54607	2.25454	2.05138	1.59065	1.54347	ref|XP_015197206.1| PREDICTED: dipeptidyl peptidase 1 [Lepisosteus oculatus]	0	60	73	2
comp2266500_c0_seq1_m.62123	1.10254	0.849471	0.90817	0.926185	0.92492	NA	NA	NA	ref|XP_009043729.1| hypothetical protein LOTGIDRAFT_227857 [Lottia gigantea] gb|ESP05184.1| hypothetical protein LOTGIDRAFT_227857 [Lottia gigantea]	0	68	80	2
comp2266503_c0_seq6_m.62129	0.566932	0.489389	0.490501	0.403793	0.397245	0.397113	0.450538	0.517515	ref|XP_013402700.1| PREDICTED: prolyl 4-hydroxylase subunit alpha-1-like [Lingula anatina]	0	53	69	3
comp2266507_c0_seq10_m.62138	9.21798	6.29096	5.83125	6.80128	6.41995	5.9682	4.56223	5.12778	pdb|1L3K|A Chain A, Up1, The Two Rna-Recognition Motif Domain Of Hnrnp A1 pdb|1U1K|A Chain A, Crystal Structure Of Up1 Complexed With D(Ttagggtt 7da Ggg); A Human Telomeric Repeat Containing 7-Deaza-A	9e-85	68	84	1
comp2266680_c0_seq1_m.62479	3.28421	2.70087	2.53963	2.62867	2.77433	3.67479	2.55961	2.50339	gb|ELU06845.1| hypothetical protein CAPTEDRAFT_183346 [Capitella teleta]	0	85	92	0
comp2266692_c0_seq1_m.62504	0.601509	0.938831	0.892407	0.899381	0.889669	0.611881	0.822427	0.68231	gb|ELU15649.1| hypothetical protein CAPTEDRAFT_167479 [Capitella teleta]	9e-140	77	88	0
comp2266701_c0_seq3_m.62512	22.861	29.4946	35.3344	15.5117	16.6308	21.1959	42.596	44.6914	gb|ELT90173.1| hypothetical protein CAPTEDRAFT_156731 [Capitella teleta]	9e-94	75	86	0
comp2266714_c1_seq1_m.62532	0.890789	0.911997	0.816629	1.08831	1.08462	1.20131	0.939968	0.99175	ref|XP_015197324.1| PREDICTED: epididymal sperm-binding protein 1-like [Lepisosteus oculatus]	1e-74	32	43	23
comp2266755_c0_seq1_m.62616	0.369627	0.463973	0.508954	0.587063	0.554533	0.47843	0.416954	0.469714	emb|CCK33034.1| RNA-binding protein SmB [Platynereis dumerilii]	7e-66	100	100	0
comp2266801_c0_seq2_m.62707	1.78056	1.83082	1.8192	2.12063	2.1972	2.28793	1.81963	1.94024	gb|ELT98080.1| hypothetical protein CAPTEDRAFT_156570 [Capitella teleta]	2e-140	69	82	2
comp2266841_c0_seq1_m.62766	1.97253	3.15561	2.55067	2.30614	1.95037	1.61642	3.22056	2.56657	ref|XP_009049292.1| hypothetical protein LOTGIDRAFT_113208 [Lottia gigantea] gb|ESP00101.1| hypothetical protein LOTGIDRAFT_113208 [Lottia gigantea]	1e-126	57	74	1
comp2266882_c0_seq1_m.62832	1.73265	2.11353	2.18662	1.82918	1.83516	1.52383	1.89342	1.85729	ref|XP_009045951.1| hypothetical protein LOTGIDRAFT_151365 [Lottia gigantea] gb|ESP03418.1| hypothetical protein LOTGIDRAFT_151365 [Lottia gigantea]	0	69	81	2
comp2266931_c0_seq5_m.62893	3.5703	4.60928	4.20861	3.13412	2.98275	3.07844	4.95178	4.47803	NA	NA	NA	NA	NA
comp2267169_c0_seq1_m.63315	14.1041	13.0069	12.4271	16.5412	16.8264	12.6055	12.1023	11.1399	dbj|BAD34674.1| creatine kinase, cytoplasmic [Hediste diversicolor]	0	91	96	0
comp2267172_c0_seq1_m.63318	0.937003	1.4611	1.31014	1.2351	1.18508	1.42295	1.72785	1.40968	ref|XP_014789676.1| PREDICTED: actin-related protein 2/3 complex subunit 4 [Octopus bimaculoides] gb|KOF63267.1| hypothetical protein OCBIM_22019751mg [Octopus bimaculoides]	1e-106	93	98	0
comp2267209_c0_seq1_m.63399	3.18108	3.20437	3.15008	2.17067	2.21923	3.20255	3.45481	3.29717	ref|XP_013419367.1| PREDICTED: titin-like isoform X4 [Lingula anatina]	0	39	58	5
comp2267341_c0_seq1_m.63653	8.15088	6.78241	7.15914	11.2383	10.2724	7.40474	5.05213	5.77937	ref|XP_013386384.1| PREDICTED: fatty acid-binding protein, heart-like [Lingula anatina]	7e-38	57	72	2
comp2267483_c0_seq3_m.63903	2.30657	1.82829	1.86492	1.9932	1.86352	2.83978	1.70484	1.68822	NA	NA	NA	NA	NA
comp2267571_c0_seq4_m.64058	4.45829	2.76821	3.03161	3.97835	4.02569	5.03787	2.57983	2.65124	gb|AAW27309.1| SJCHGC05979 protein [Schistosoma japonicum] emb|CAX75664.1| Complexin precursor (Synaphin) [Schistosoma japonicum] emb|CAX75665.1| Complexin precursor (Synaphin) [Schistosoma japonicum]	2e-12	55	71	2
comp2267634_c0_seq2_m.64174	3.60707	2.58737	2.64301	3.27839	2.5764	2.05248	2.1156	2.03343	NA	NA	NA	NA	NA
comp2267718_c0_seq1_m.64309	0.850124	0.98216	0.953418	0.864126	0.826762	0.742383	0.858919	0.786762	ref|XP_011447879.1| PREDICTED: T-complex protein 1 subunit gamma-like [Crassostrea gigas]	0	79	91	0
comp2267732_c0_seq2_m.64331	8.04015	4.9115	5.17889	5.7286	5.28744	4.92427	3.94801	4.3411	ref|XP_009021122.1| hypothetical protein HELRODRAFT_175454 [Helobdella robusta] gb|ESO00951.1| hypothetical protein HELRODRAFT_175454 [Helobdella robusta]	4e-45	56	71	0
comp2267968_c0_seq2_m.64758	14.3404	13.9048	16.8304	10.9916	11.7158	11.2979	13.3287	14.81	ref|XP_012942981.1| PREDICTED: myophilin-like [Aplysia californica]	4e-49	70	79	0
comp2268115_c0_seq2_m.65034	4.56153	2.84575	3.3063	4.38115	3.99381	3.8847	2.62638	2.67477	gb|ELT96905.1| hypothetical protein CAPTEDRAFT_224530 [Capitella teleta]	1e-34	59	71	2
comp2268172_c0_seq1_m.65149	2.22082	2.05296	1.99289	2.75683	2.52805	1.51051	1.95405	2.25841	gb|ELT99347.1| hypothetical protein CAPTEDRAFT_181075 [Capitella teleta]	8e-147	53	71	2
comp2268194_c0_seq1_m.65186	4.58309	3.35153	3.63421	3.8128	3.92034	4.59883	3.36874	4.01941	NA	NA	NA	NA	NA
comp2268336_c0_seq2_m.65472	1.49341	1.32559	1.347	1.63515	1.60741	1.62557	1.44929	1.53698	ref|WP_049491992.1| peptidase M26 [Streptococcus pseudopneumoniae]	4e-09	31	42	25
comp2268336_c1_seq1_m.65474	1.4067	1.35109	1.34244	1.84964	1.66794	1.41352	1.63557	1.51344	dbj|BAE93516.1| regeneration-upregulated protein 5 [Enchytraeus japonensis]	3e-24	32	58	4
comp2268340_c1_seq1_m.65478	0.700263	1.07162	0.974698	0.856752	0.848999	0.739157	1.13473	1.00709	gb|ELU00422.1| hypothetical protein CAPTEDRAFT_169511 [Capitella teleta]	0	71	86	1
comp2268417_c0_seq2_m.65592	27.5345	24.9152	24.0993	19.8841	19.7341	24.7454	25.6218	25.7166	gb|ELU01357.1| hypothetical protein CAPTEDRAFT_182411 [Capitella teleta]	2e-143	50	70	3
comp2268441_c0_seq1_m.65632	1.80868	2.09321	2.02439	3.1243	2.76197	2.42675	1.65236	1.90948	ref|XP_013393822.1| PREDICTED: mammalian ependymin-related protein 1-like [Lingula anatina]	2e-06	32	51	2
comp2268443_c0_seq2_m.65634	2.40347	3.05327	2.80659	2.52927	2.56845	2.67868	3.1693	3.02784	ref|XP_002585705.1| hypothetical protein BRAFLDRAFT_114166 [Branchiostoma floridae] gb|EEN41716.1| hypothetical protein BRAFLDRAFT_114166 [Branchiostoma floridae]	0	88	96	0
comp2268473_c1_seq1_m.65668	0.747557	1.21174	0.950464	1.56233	1.26037	0.539691	1.14231	1.0785	ref|XP_005089923.2| PREDICTED: heme-binding protein 2-like [Aplysia californica]	2e-56	53	69	2
comp2268798_c0_seq2_m.66233	1.41729	2.14768	1.94037	2.09422	1.98184	2.05975	2.76616	2.585	gb|ELT95603.1| hypothetical protein CAPTEDRAFT_180307 [Capitella teleta]	0	80	90	1
comp2268857_c0_seq2_m.66328	2.52499	2.33607	2.17773	1.96985	2.01501	2.25806	2.25893	2.49935	gb|KPJ66835.1| hypothetical protein AMJ43_06675 [Coxiella sp. DG_40]	9e-06	29	49	8
comp2268869_c0_seq6_m.66344	3.30354	6.12636	5.92658	2.69148	1.95574	2.27122	4.93448	3.90304	ref|XP_009065264.1| hypothetical protein LOTGIDRAFT_229628 [Lottia gigantea] gb|ESO84138.1| hypothetical protein LOTGIDRAFT_229628 [Lottia gigantea]	2e-07	27	42	9
comp2268874_c0_seq62_m.66354	17.7026	17.7181	16.9878	16.0062	15.0944	16.2687	16.9745	16.8284	ref|XP_011425994.1| PREDICTED: alpha-adducin-like isoform X8 [Crassostrea gigas]	0	50	70	7
comp2268892_c0_seq1_m.66381	8.69381	6.1056	7.12574	4.43202	4.56297	5.51248	5.04414	5.57726	gb|ELU04261.1| hypothetical protein CAPTEDRAFT_171595 [Capitella teleta]	2e-17	41	62	7
comp2268906_c0_seq4_m.66401	10.3975	11.4307	11.3498	8.68794	8.18284	7.4414	10.826	10.6035	gb|ELU02124.1| hypothetical protein CAPTEDRAFT_154247 [Capitella teleta]	7e-138	60	76	1
comp2268937_c0_seq1_m.66472	4.73878	6.66664	6.43254	5.88292	5.86967	5.02194	8.19121	7.76013	gb|ELU02204.1| hypothetical protein CAPTEDRAFT_162826 [Capitella teleta]	3e-92	47	65	4
comp2268942_c0_seq5_m.66483	0.759678	0.85743	0.836122	0.613111	0.615128	0.590407	0.771621	0.825539	gb|ELT99735.1| hypothetical protein CAPTEDRAFT_180340 [Capitella teleta]	2e-57	31	50	6
comp2268964_c0_seq1_m.66515	2.52235	2.32388	2.72599	1.90592	1.84755	1.88668	1.85209	2.05387	gb|EPB79035.1| peptidyl-prolyl cis-trans isomerase, cyclophilin-type [Ancylostoma ceylanicum] gb|EYB84042.1| hypothetical protein Y032_0323g2468 [Ancylostoma ceylanicum]	3e-78	60	75	0
comp2268978_c0_seq1_m.66540	0.416142	0.745701	0.678539	0.401562	0.402773	0.459883	0.883445	0.699503	gb|ELU01470.1| hypothetical protein CAPTEDRAFT_222851 [Capitella teleta]	4e-32	42	60	3
comp2269009_c0_seq1_m.66627	3.02965	2.04638	2.30661	2.79224	2.63458	2.76837	1.6382	1.99546	ref|XP_013388466.1| PREDICTED: probable calcium-binding protein CML10 [Lingula anatina]	1e-29	47	73	0
comp2269023_c0_seq1_m.66650	0.807915	0.929631	0.925826	0.902308	0.86233	0.863262	0.886904	0.936404	ref|XP_011428434.1| PREDICTED: Golgi reassembly-stacking protein 2-like isoform X2 [Crassostrea gigas]	2e-121	68	79	8
comp2269029_c1_seq11_m.66661	1.7988	1.7225	1.63107	1.56272	1.58992	1.37707	1.46639	1.36256	ref|XP_013781869.1| PREDICTED: LOW QUALITY PROTEIN: F-actin-capping protein subunit beta-like [Limulus polyphemus]	6e-164	85	92	0
comp2269060_c0_seq1_m.66718	4.4697	3.80375	4.08837	2.7694	2.89713	4.30552	3.95828	3.97693	gb|ELT99795.1| hypothetical protein CAPTEDRAFT_228680 [Capitella teleta]	1e-20	43	57	18
comp2269060_c1_seq1_m.66719	3.43424	2.59145	2.81542	1.81288	1.95269	2.48595	2.51946	2.61074	gb|ELT99795.1| hypothetical protein CAPTEDRAFT_228680 [Capitella teleta]	6e-23	41	54	15
comp2269110_c0_seq3_m.66810	1.51894	1.23167	1.25198	1.53189	1.45757	1.07033	1.27233	1.35643	gb|ELU01519.1| hypothetical protein CAPTEDRAFT_173502, partial [Capitella teleta]	8e-109	93	97	0
comp2269158_c0_seq1_m.66914	7.62435	10.2132	10.3761	9.73909	9.74044	6.1563	9.79046	8.61195	gb|AAS02315.1| glyceraldehyde 3-phosphate dehydrogenase [Nereis macrydi]	0	93	99	0
comp2269171_c0_seq3_m.66933	4.74931	6.16608	5.62163	8.40998	7.41908	3.80557	5.82194	5.30376	gb|AEI58895.1| cathepsin D [Pteria penguin]	0	72	83	1
comp2269185_c0_seq2_m.66963	2.70719	1.88017	1.82688	1.74554	1.78906	4.13105	1.69704	1.76782	ref|XP_013408423.1| PREDICTED: heterogeneous nuclear ribonucleoprotein H3-like [Lingula anatina]	2e-50	64	82	3
comp2269201_c0_seq1_m.67004	3.00576	1.62601	1.71965	1.92028	1.96697	2.48924	1.7253	2.00333	ref|WP_020534160.1| hypothetical protein [Lewinella cohaerens]	8e-33	43	54	6
comp2269230_c0_seq2_m.67055	6.78422	6.05725	5.85512	4.87049	4.81089	6.35792	6.54403	6.75137	ref|XP_002597653.1| hypothetical protein BRAFLDRAFT_77453 [Branchiostoma floridae] gb|EEN53665.1| hypothetical protein BRAFLDRAFT_77453 [Branchiostoma floridae]	9e-113	42	56	19
comp2269297_c0_seq2_m.67181	3.40555	3.47949	3.48991	5.45697	5.03872	3.10677	2.55933	2.73156	gb|ELU16785.1| hypothetical protein CAPTEDRAFT_225175 [Capitella teleta]	6e-156	41	60	9
comp2269321_c1_seq1_m.67212	3.17948	1.83946	2.17423	2.56324	2.46712	3.35576	1.6535	1.9339	gb|ELT97660.1| hypothetical protein CAPTEDRAFT_156165 [Capitella teleta]	1e-76	73	87	2
comp2269324_c0_seq1_m.67217	0.779691	0.710661	0.782318	0.958491	0.903566	1.2112	0.714063	0.480416	ref|XP_013786272.1| PREDICTED: 26S proteasome non-ATPase regulatory subunit 4-like [Limulus polyphemus]	5e-159	66	79	8
comp2269326_c0_seq2_m.67220	1.59055	1.32161	1.36686	1.26527	1.3	1.9122	1.43232	1.44843	gb|ELU05631.1| hypothetical protein CAPTEDRAFT_229004 [Capitella teleta]	1e-93	57	71	10
comp2269345_c0_seq1_m.67253	13.5078	16.7806	16.1276	13.7957	13.5768	10.2059	15.6887	14.1922	ref|XP_009022669.1| hypothetical protein HELRODRAFT_185027 [Helobdella robusta] gb|ESN98677.1| hypothetical protein HELRODRAFT_185027 [Helobdella robusta]	0	83	92	0
comp2269374_c0_seq3_m.67298	15.3052	16.9039	15.3615	14.2256	13.2281	12.7898	17.053	14.8778	gb|ELU07066.1| hypothetical protein CAPTEDRAFT_164235 [Capitella teleta]	0	74	85	1
comp2269580_c0_seq1_m.67656	1.752	1.94131	2.10723	2.42973	2.38526	1.54395	1.70735	1.61559	ref|XP_011437315.1| PREDICTED: ubiquitin-conjugating enzyme E2 N [Crassostrea gigas]	7e-87	91	95	0
comp2269593_c0_seq3_m.67692	4.89294	6.11059	5.77897	5.61634	5.56835	4.52334	6.36892	5.58535	gb|ELU03314.1| hypothetical protein CAPTEDRAFT_228164 [Capitella teleta]	0	70	83	0
comp2269601_c0_seq3_m.67709	4.01759	4.47326	4.25536	3.90408	3.64192	3.70299	4.36063	4.08004	ref|XP_011452894.1| PREDICTED: dolichyl-diphosphooligosaccharide--protein glycosyltransferase 48 kDa subunit-like [Crassostrea gigas]	0	73	88	0
comp2269611_c0_seq1_m.67728	0.444328	0.620644	0.615751	0.552886	0.570671	0.506979	0.610268	0.607557	ref|XP_011428761.1| PREDICTED: L-threonine 3-dehydrogenase, mitochondrial-like [Crassostrea gigas] gb|EKC22591.1| L-threonine 3-dehydrogenase, mitochondrial [Crassostrea gigas]	2e-177	77	87	0
comp2269627_c0_seq2_m.67749	0.545067	0.726574	0.763956	0.585453	0.654843	NA	NA	NA	gb|ACR54103.1| ATP synthase subunit g [Palaemon varians]	2e-30	60	78	0
comp2269698_c0_seq1_m.67864	1.07889	1.39118	1.27818	0.999188	1.02129	1.02559	1.30582	1.24855	ref|XP_013402022.1| PREDICTED: importin subunit beta-1-like [Lingula anatina] ref|XP_013386092.1| PREDICTED: importin subunit beta-1-like [Lingula anatina]	0	76	88	0
comp2269773_c0_seq6_m.68002	0.944203	1.06523	1.00694	1.06015	1.05759	1.23517	1.22923	1.2584	gb|ELU02654.1| hypothetical protein CAPTEDRAFT_223415 [Capitella teleta]	0	88	95	0
comp2269793_c0_seq1_m.68039	0.736595	0.882367	0.919759	0.70782	0.808518	0.792041	1.00624	0.982165	gb|ELU12045.1| hypothetical protein CAPTEDRAFT_219768 [Capitella teleta]	4e-132	43	60	11
comp2269814_c0_seq1_m.68069	1.03968	1.43056	1.36458	1.2381	1.21241	1.08958	1.54123	1.50568	ref|XP_014768428.1| PREDICTED: NADH-ubiquinone oxidoreductase 49 kDa subunit-like [Octopus bimaculoides] gb|KOF94166.1| hypothetical protein OCBIM_22002646mg [Octopus bimaculoides]	0	80	89	0
comp2269848_c0_seq4_m.68115	0.955748	0.926502	0.996472	0.746639	0.764327	0.605273	0.929989	0.905533	ref|XP_009062780.1| hypothetical protein LOTGIDRAFT_128909, partial [Lottia gigantea] gb|ESO86545.1| hypothetical protein LOTGIDRAFT_128909, partial [Lottia gigantea]	1e-132	48	70	0
comp2269850_c0_seq1_m.68122	1.52659	2.2326	2.28226	1.38329	1.38991	1.7238	2.65392	2.46066	ref|XP_009043702.1| hypothetical protein LOTGIDRAFT_227836 [Lottia gigantea] gb|ESP05157.1| hypothetical protein LOTGIDRAFT_227836 [Lottia gigantea]	1e-50	35	55	3
comp2269906_c0_seq2_m.68214	1.99197	1.5498	1.67424	2.36906	2.11198	1.27214	1.19659	1.08243	gb|ELT93347.1| hypothetical protein CAPTEDRAFT_181658 [Capitella teleta]	3e-89	64	80	0
comp2269987_c0_seq2_m.68354	1.60716	2.73232	2.29382	2.03848	1.85014	2.44547	3.65943	2.8566	gb|ELU07072.1| hypothetical protein CAPTEDRAFT_182829 [Capitella teleta]	0	83	93	0
comp2270085_c0_seq9_m.68531	1.37435	1.75778	1.60569	1.46537	1.46252	1.58878	2.00691	1.81943	gb|ELU04125.1| hypothetical protein CAPTEDRAFT_149233 [Capitella teleta]	0	89	95	0
comp2270119_c0_seq15_m.68605	0.73986	0.883211	0.791236	0.728058	0.675661	0.925922	0.974578	0.873476	gb|ELT96070.1| hypothetical protein CAPTEDRAFT_214707 [Capitella teleta]	4e-23	25	43	12
comp2270148_c0_seq3_m.68661	5.45576	4.66195	5.10823	6.32285	6.23961	4.23491	4.05411	4.03701	ref|XP_009011217.1| hypothetical protein HELRODRAFT_167462 [Helobdella robusta] gb|ESO10948.1| hypothetical protein HELRODRAFT_167462 [Helobdella robusta]	1e-24	37	57	3
comp2270220_c0_seq1_m.68776	0.272682	0.385315	0.381593	0.405504	0.455051	0.242245	0.40357	0.33442	NA	NA	NA	NA	NA
comp2270228_c0_seq1_m.68797	0.663843	0.751058	0.773395	0.576652	0.586084	0.487991	0.728882	0.688431	ref|XP_002611539.1| hypothetical protein BRAFLDRAFT_117184 [Branchiostoma floridae] gb|EEN67549.1| hypothetical protein BRAFLDRAFT_117184 [Branchiostoma floridae]	2e-84	47	66	2
comp2270279_c0_seq7_m.68904	11.4494	7.54173	8.03818	11.2868	11.0552	10.063	6.87907	7.5501	gb|ELU01379.1| hypothetical protein CAPTEDRAFT_20184 [Capitella teleta]	2e-46	47	58	18
comp2270372_c0_seq1_m.69078	1.48991	1.61897	1.58228	1.90164	1.75783	1.71984	1.63373	1.57308	gb|ELU03152.1| hypothetical protein CAPTEDRAFT_223024 [Capitella teleta]	1e-170	59	75	1
comp2270385_c0_seq11_m.69105	0.56347	0.769021	0.721097	0.617458	0.687522	NA	NA	NA	gb|ABR68850.1| synaptotagmin [Platynereis dumerilii]	2e-155	97	98	1
comp2270404_c0_seq3_m.69137	1.20026	0.698038	0.785918	0.917182	0.877849	1.12825	0.607407	0.683367	ref|XP_013414903.1| PREDICTED: prefoldin subunit 2-like [Lingula anatina]	3e-50	65	77	2
comp2270458_c0_seq1_m.69251	4.69978	4.314	4.63861	3.77093	3.87992	4.24936	4.77636	4.45869	ref|XP_013421362.1| PREDICTED: sarcoplasmic calcium-binding proteins II, V, VI, and VII-like isoform X1 [Lingula anatina] ref|XP_013421363.1| PREDICTED: sarcoplasmic calcium-binding proteins II, V, VI	7e-42	40	61	3
comp2270576_c0_seq1_m.69463	0.936819	1.60338	1.40478	1.38369	1.24316	0.725559	1.43463	1.06627	gb|ELT92419.1| hypothetical protein CAPTEDRAFT_148966 [Capitella teleta]	5e-100	95	98	0
comp2270797_c0_seq10_m.69872	3.06238	2.64826	2.76496	2.14918	2.14211	2.65293	2.55564	2.72518	gb|KFM78626.1| hypothetical protein X975_05086, partial [Stegodyphus mimosarum]	2e-87	39	57	13
comp2270828_c0_seq11_m.69939	6.10562	4.5964	4.73208	4.65705	4.7431	6.03898	4.29799	4.8648	ref|XP_002590279.1| hypothetical protein BRAFLDRAFT_216286 [Branchiostoma floridae] gb|EEN46290.1| hypothetical protein BRAFLDRAFT_216286, partial [Branchiostoma floridae]	2e-109	60	78	0
comp2270845_c1_seq1_m.69967	1.41056	1.76228	1.70089	1.50771	1.42888	1.23173	2.25005	2.16648	ref|XP_013398855.1| PREDICTED: serine/threonine-protein phosphatase 2A 56 kDa regulatory subunit epsilon isoform-like isoform X1 [Lingula anatina]	0	87	92	1
comp2270876_c0_seq2_m.70018	1.85584	1.28014	1.33304	1.28521	1.2274	1.89442	1.02648	1.11974	ref|XP_006815935.1| PREDICTED: lupus La protein homolog isoform X3 [Saccoglossus kowalevskii]	6e-81	49	70	1
comp2270905_c1_seq5_m.70069	0.471021	0.366398	0.374029	0.534704	0.398748	0.596542	0.316861	0.431295	ref|XP_015278210.1| PREDICTED: fibronectin-like, partial [Gekko japonicus]	2e-28	31	44	17
comp2270996_c0_seq5_m.70236	0.440259	0.623925	0.542853	0.628035	0.572509	0.737042	0.654736	0.589274	ref|XP_013387688.1| PREDICTED: pejvakin-like [Lingula anatina]	9e-103	43	59	5
comp2271124_c0_seq1_m.70454	1.15952	1.31931	1.14828	1.57595	1.33701	1.2171	1.36173	1.21308	ref|XP_015197324.1| PREDICTED: epididymal sperm-binding protein 1-like [Lepisosteus oculatus]	1e-33	31	45	9
comp2271225_c0_seq5_m.70641	53.0327	36.7405	49.4237	31.6339	30.6262	31.5399	36.7278	36.4813	gb|AAN63944.1| myosin essential light chain [Eisenia fetida]	5e-73	73	85	0
comp2271244_c0_seq1_m.70676	5.64191	6.79363	6.09535	5.30774	5.01523	5.03737	6.40342	5.10871	ref|XP_013399917.1| PREDICTED: 60S ribosomal protein L6-like [Lingula anatina]	4e-121	69	83	2
comp2271257_c1_seq1_m.70699	1.01229	1.25363	1.14421	0.827247	0.767436	NA	NA	NA	ref|XP_013401006.1| PREDICTED: nucleolar protein 58-like [Lingula anatina]	0	74	86	2
comp2271350_c0_seq18_m.70898	0.716034	0.884209	0.871961	1.19793	1.04167	0.713777	0.93976	0.948016	gb|ELU14039.1| hypothetical protein CAPTEDRAFT_154474 [Capitella teleta]	2e-124	75	85	0
comp2271350_c0_seq18_m.70897	1.38224	1.32656	1.30026	2.35426	1.88962	1.52358	1.44169	1.40097	gb|ELU14039.1| hypothetical protein CAPTEDRAFT_154474 [Capitella teleta]	2e-124	75	85	0
comp2271413_c1_seq5_m.70995	5.50289	4.13851	4.27268	4.3487	4.35435	5.81333	3.831	4.23989	ref|XP_011424744.1| PREDICTED: LIM and SH3 domain protein F42H10.3-like isoform X4 [Crassostrea gigas]	4e-63	41	54	8
comp2271419_c1_seq1_m.71009	0.116673	0.16631	0.169447	0.141085	0.141835	0.10515	0.207063	0.186021	gb|ELU06542.1| hypothetical protein CAPTEDRAFT_148285 [Capitella teleta]	0	53	71	1
comp2271425_c0_seq4_m.71034	1.77302	1.53884	1.53122	1.42546	1.41321	1.60592	1.62091	1.96926	tpg|DAA34416.1| TPA_inf: alternative splicing factor ASF/SF2 [Amblyomma variegatum]	1e-82	80	85	5
comp2271526_c0_seq3_m.71285	0.665228	0.527748	0.444021	0.617618	0.667614	0.565787	0.45402	0.389103	ref|WP_027389160.1| hypothetical protein, partial [Chrysiogenes arsenatis]	7e-06	27	36	9
comp2271535_c0_seq1_m.71319	0.964866	1.17316	1.14371	1.16627	1.21051	1.21459	1.30489	1.44075	ref|XP_013772646.1| PREDICTED: cytochrome c1, heme protein, mitochondrial-like [Limulus polyphemus]	2e-126	76	86	0
comp2271539_c0_seq2_m.71326	1.28035	1.18425	1.20293	1.59119	1.57633	1.37387	1.11364	1.22199	gb|ELT97255.1| hypothetical protein CAPTEDRAFT_151799 [Capitella teleta]	4e-63	44	62	5
comp2271567_c0_seq1_m.71391	3.3033	4.83565	4.46113	3.23207	3.17042	3.53122	4.81918	4.56944	gb|ELU15089.1| hypothetical protein CAPTEDRAFT_160914 [Capitella teleta]	0	45	63	6
comp2271594_c0_seq8_m.71451	0.765732	0.511366	0.509455	0.650994	0.587309	0.683658	0.379108	0.437553	NA	NA	NA	NA	NA
comp2271595_c0_seq2_m.71452	2.92877	3.94811	3.5915	2.90926	2.92464	2.70461	4.28155	3.62206	gb|ELU13881.1| hypothetical protein CAPTEDRAFT_175923 [Capitella teleta]	0	76	86	0
comp2271636_c1_seq22_m.71557	16.001	14.5868	14.2303	17.1841	17.2655	18.2882	16.0236	16.1222	gb|ELT87063.1| hypothetical protein CAPTEDRAFT_222839 [Capitella teleta]	2e-24	25	42	12
comp2271637_c0_seq1_m.71562	1.13666	1.50672	1.40828	1.20579	1.22804	1.16541	1.74745	1.63357	gb|ELU17448.1| hypothetical protein CAPTEDRAFT_164427 [Capitella teleta]	0	75	89	0
comp2271649_c0_seq1_m.71599	2.14256	1.71626	1.9039	1.32521	1.34098	1.58668	1.64873	1.8733	gb|ELU11057.1| hypothetical protein CAPTEDRAFT_228467 [Capitella teleta]	7e-05	51	65	0
comp2271667_c0_seq1_m.71637	0.911987	1.13057	1.04378	1.02196	0.936877	1.03249	1.05868	0.98395	gb|ELU00241.1| hypothetical protein CAPTEDRAFT_229052 [Capitella teleta]	2e-156	58	70	5
comp2271675_c0_seq2_m.71655	0.261927	0.552776	0.345848	0.346512	0.342151	NA	NA	NA	NA	NA	NA	NA	NA
comp2271737_c1_seq2_m.71770	2.04673	1.27647	1.24191	2.32778	2.16264	6.19583	1.74854	1.66287	NA	NA	NA	NA	NA
comp2271753_c0_seq2_m.71801	0.205186	0.257971	0.243861	0.189481	0.176631	0.239692	0.274534	0.272039	emb|CBN80576.1| U3 small nucleolar RNA-interacting protein 2 [Dicentrarchus labrax]	3e-167	63	80	0
comp2271783_c0_seq2_m.71842	3.03439	2.67683	2.67142	2.84437	2.82776	3.53444	2.68646	2.84534	gb|ELU18050.1| hypothetical protein CAPTEDRAFT_222791 [Capitella teleta]	3e-120	56	70	0
comp2271871_c0_seq8_m.72023	0.912951	1.26611	1.20147	1.14281	1.21436	1.06909	1.28481	1.21812	gb|ELU10080.1| hypothetical protein CAPTEDRAFT_167519 [Capitella teleta]	0	65	80	3
comp2271906_c0_seq1_m.72107	1.12121	1.48458	1.33455	1.19072	1.11924	1.39108	1.5263	1.14294	gb|ELT95532.1| hypothetical protein CAPTEDRAFT_148437 [Capitella teleta]	6e-112	81	92	1
comp2271916_c0_seq1_m.72122	2.65254	3.60485	3.40729	3.18203	3.11411	3.07591	3.89555	3.66337	gb|ELT97633.1| hypothetical protein CAPTEDRAFT_160925 [Capitella teleta]	0	78	88	0
comp2271944_c0_seq11_m.72172	0.581921	0.790001	0.747125	0.702845	0.617797	1.03362	1.11527	1.2002	gb|KOF73592.1| hypothetical protein OCBIM_22037642mg [Octopus bimaculoides]	2e-45	71	80	9
comp2271994_c0_seq2_m.72269	8.25512	6.98456	7.53695	3.67586	3.95331	6.51187	6.75262	7.13864	gb|KOF71038.1| hypothetical protein OCBIM_22001786mg [Octopus bimaculoides]	1e-19	28	45	21
comp2272087_c1_seq4_m.72458	3.31413	2.9886	3.20301	2.9198	2.42535	2.5385	2.91777	2.74179	ref|XP_009016114.1| hypothetical protein HELRODRAFT_77319 [Helobdella robusta] gb|ESO05481.1| hypothetical protein HELRODRAFT_77319 [Helobdella robusta]	1e-23	42	63	1
comp2272118_c0_seq11_m.72524	0.450783	0.647859	0.61984	0.481275	0.553236	0.572459	0.853806	0.763861	ref|XP_005104155.1| PREDICTED: atlastin-like isoform X2 [Aplysia californica]	0	59	77	2
comp2272182_c0_seq2_m.72649	4.07895	5.14071	4.98313	4.64305	4.23636	4.77976	5.30636	4.78086	ref|XP_014652995.1| PREDICTED: glucose-6-phosphate 1-dehydrogenase isoform X1 [Ceratotherium simum simum]	0	64	79	2
comp2272233_c0_seq1_m.72760	7.62676	6.42345	6.23705	5.1905	5.23015	6.72903	6.15722	6.46975	ref|XP_009048109.1| hypothetical protein LOTGIDRAFT_139785 [Lottia gigantea] gb|ESP01166.1| hypothetical protein LOTGIDRAFT_139785 [Lottia gigantea]	0	54	72	2
comp2272254_c0_seq4_m.72822	2.70862	1.77792	2.19262	1.5794	1.6646	2.14366	1.69415	2.02421	ref|XP_009014858.1| hypothetical protein HELRODRAFT_191186 [Helobdella robusta] gb|ESO06762.1| hypothetical protein HELRODRAFT_191186 [Helobdella robusta]	1e-41	27	48	7
comp2272299_c0_seq11_m.72914	2.97445	2.25378	2.4827	2.04777	2.18328	2.33007	2.23747	2.29855	ref|XP_011674994.1| PREDICTED: kielin/chordin-like protein isoform X2 [Strongylocentrotus purpuratus]	0	51	61	5
comp2272319_c0_seq24_m.72950	14.2993	16.7579	16.1919	46.1434	48.3504	11.6476	18.4049	14.6911	gb|ELU07823.1| hypothetical protein CAPTEDRAFT_152329 [Capitella teleta]	4e-104	44	61	3
comp2272371_c0_seq1_m.73054	4.46281	4.29524	4.17654	3.72292	3.70066	4.80159	4.02793	4.01709	ref|XP_013400394.1| PREDICTED: staphylococcal nuclease domain-containing protein 1-like [Lingula anatina]	0	66	82	1
comp2272433_c0_seq1_m.73197	0.633361	0.809371	0.80198	0.771235	0.770644	NA	NA	NA	ref|XP_002602065.1| hypothetical protein BRAFLDRAFT_228268 [Branchiostoma floridae] gb|EEN58077.1| hypothetical protein BRAFLDRAFT_228268 [Branchiostoma floridae]	0	58	75	0
comp2272435_c0_seq2_m.73201	0.288425	0.496647	0.464073	0.388162	0.372746	NA	NA	NA	gb|ELT92967.1| hypothetical protein CAPTEDRAFT_150806 [Capitella teleta]	2e-141	41	64	3
comp2272437_c1_seq1_m.73204	0.877261	0.600167	0.5518	1.15066	1.06177	3.2461	0.629202	0.656168	NA	NA	NA	NA	NA
comp2272491_c1_seq4_m.73302	2.42211	2.10054	2.03286	2.55391	2.40375	3.21565	2.27691	2.51296	gb|ELT91752.1| hypothetical protein CAPTEDRAFT_173985 [Capitella teleta]	0	51	67	5
comp2272495_c0_seq1_m.73308	1.63511	2.17565	1.96885	2.40766	2.49562	1.71778	2.28749	1.96811	ref|XP_011450475.1| PREDICTED: aldehyde dehydrogenase, mitochondrial-like [Crassostrea gigas] gb|EKC30500.1| Aldehyde dehydrogenase, mitochondrial [Crassostrea gigas]	0	73	86	0
comp2272519_c1_seq3_m.73361	10.3395	10.44	10.9453	8.68494	8.38018	9.16958	11.4884	11.2927	gb|ELU02263.1| hypothetical protein CAPTEDRAFT_163591 [Capitella teleta]	1e-132	49	60	6
comp2272547_c0_seq4_m.73421	4.14304	3.06445	3.06727	2.92748	2.84977	4.40635	2.9349	3.44576	ref|XP_013787758.1| PREDICTED: src substrate cortactin-like [Limulus polyphemus] ref|XP_013787759.1| PREDICTED: src substrate cortactin-like [Limulus polyphemus] ref|XP_013787760.1| PREDICTED: src sub	0	54	68	7
comp2272583_c0_seq2_m.73488	4.32371	3.92448	3.93711	3.79496	3.83466	4.25352	4.02837	4.04311	ref|XP_009064001.1| hypothetical protein LOTGIDRAFT_221335 [Lottia gigantea] gb|ESO85297.1| hypothetical protein LOTGIDRAFT_221335 [Lottia gigantea]	0	78	89	0
comp2272641_c0_seq2_m.73619	11.0087	12.4083	11.4234	10.8276	10.5453	10.9868	12.3582	10.9498	gb|ELT88323.1| hypothetical protein CAPTEDRAFT_148023 [Capitella teleta]	0	75	86	4
comp2272691_c0_seq4_m.73750	51.0185	96.8598	92.3189	37.572	37.8732	49.8846	113.742	111.866	ref|XP_011429257.1| PREDICTED: paramyosin-like isoform X3 [Crassostrea gigas]	0	58	77	1
comp2272698_c0_seq4_m.73763	3.36907	3.8279	3.57337	6.90323	7.37801	3.45646	4.22054	3.69423	ref|XP_013419065.1| PREDICTED: 5'-nucleotidase-like [Lingula anatina]	5e-164	46	66	2
comp2272724_c0_seq1_m.73818	5.03024	5.26657	4.83951	4.31963	4.15039	4.11891	4.89442	4.42518	ref|XP_013378880.1| PREDICTED: dolichyl-diphosphooligosaccharide--protein glycosyltransferase subunit 1-like [Lingula anatina]	0	61	79	1
comp2272782_c0_seq2_m.73955	3.74858	2.53535	2.92215	3.75053	3.78382	3.98595	2.44079	2.80169	ref|XP_013417998.1| PREDICTED: clathrin light chain A-like isoform X8 [Lingula anatina]	1e-48	56	67	8
comp2272807_c0_seq4_m.74003	2.29063	2.21321	2.16963	1.92366	1.89862	2.1455	2.32222	2.26657	ref|XP_011419437.1| PREDICTED: bifunctional glutamate/proline--tRNA ligase-like [Crassostrea gigas]	0	58	72	3
comp2272842_c0_seq2_m.74081	3.85178	2.56325	2.91512	2.70743	2.70085	5.02549	2.34478	3.03989	ref|XP_011438395.1| PREDICTED: SAP domain-containing ribonucleoprotein-like [Crassostrea gigas]	5e-30	43	58	12
comp2272863_c1_seq5_m.74143	2.48108	2.08518	2.08671	2.13213	2.09006	2.87513	1.84665	1.95258	gb|ELT89137.1| hypothetical protein CAPTEDRAFT_171528 [Capitella teleta]	1e-66	70	87	0
comp2272876_c0_seq2_m.74167	0.749986	0.715085	0.7334	1.01572	0.951274	NA	NA	NA	ref|XP_005304899.1| PREDICTED: lysosomal protective protein [Chrysemys picta bellii]	9e-160	49	68	3
comp2272882_c0_seq14_m.74184	1.96175	1.3596	1.419	2.09926	2.19412	2.49439	1.39298	1.59121	gb|ELT93476.1| hypothetical protein CAPTEDRAFT_222902 [Capitella teleta]	2e-25	38	51	20
comp2272920_c0_seq1_m.74280	2.08464	2.7686	2.57804	2.26302	2.29743	2.66427	3.38742	3.15504	ref|XP_013860704.1| PREDICTED: serine/threonine-protein phosphatase 2A 65 kDa regulatory subunit A beta isoform [Austrofundulus limnaeus]	0	70	84	0
comp2272961_c0_seq1_m.74370	0.851678	0.990542	0.965484	1.35936	1.47671	NA	NA	NA	gb|EYC18919.1| hypothetical protein Y032_0026g1450 [Ancylostoma ceylanicum]	3e-93	49	68	1
comp2273017_c0_seq1_m.74484	6.82515	5.76245	5.66437	5.53335	5.30064	6.03623	5.71203	5.58618	gb|ELU00538.1| hypothetical protein CAPTEDRAFT_134807, partial [Capitella teleta]	0	55	75	1
comp2273038_c0_seq3_m.74522	49.2315	46.3522	50.0164	32.2984	31.8847	34.9496	52.2857	50.1888	gb|ELT94727.1| hypothetical protein CAPTEDRAFT_223059 [Capitella teleta]	0	56	73	1
comp2273141_c0_seq2_m.74737	33.024	41.4776	42.2233	27.5396	28.1982	28.1097	40.939	37.2951	gb|ELU16302.1| hypothetical protein CAPTEDRAFT_101963 [Capitella teleta]	0	87	95	0
comp2273142_c0_seq1_m.74744	1.0562	0.79485	0.826732	1.01715	0.915212	0.899787	0.658235	0.665118	ref|XP_014674120.1| PREDICTED: protein SET-like isoform X2 [Priapulus caudatus]	1e-104	75	83	2
comp2273193_c0_seq1_m.74830	5.45545	3.92156	4.81439	3.79251	3.77045	3.18007	3.00082	3.40216	emb|CDS28034.1| PDZ and LIM domain protein Zasp [Hymenolepis microstoma]	2e-39	41	58	7
comp2273204_c0_seq26_m.74869	4.02676	3.81356	3.60416	3.26425	3.18283	3.73626	3.86818	4.19671	gb|KOF64097.1| hypothetical protein OCBIM_22017780mg [Octopus bimaculoides]	2e-138	69	85	0
comp2273216_c0_seq3_m.74900	6.15636	7.09915	6.86415	6.45827	6.44341	5.43388	7.51996	6.79004	gb|ELT95122.1| hypothetical protein CAPTEDRAFT_120375 [Capitella teleta]	0	77	88	0
comp2273249_c0_seq4_m.74967	12.1183	9.40821	8.62385	9.28798	9.31958	12.6078	9.46824	10.3347	ref|XP_002593212.1| hypothetical protein BRAFLDRAFT_120140 [Branchiostoma floridae] gb|EEN49223.1| hypothetical protein BRAFLDRAFT_120140 [Branchiostoma floridae]	1e-21	36	50	12
comp2273257_c0_seq9_m.74986	10.34	14.8504	16.0142	21.2599	23.7157	9.37934	14.0748	10.2711	gb|KJB21638.1| hypothetical protein B456_004G005600 [Gossypium raimondii]	5e-45	83	90	0
comp2273356_c0_seq1_m.75157	3.27013	4.01738	3.89497	3.46678	3.49188	3.1632	3.89138	3.56483	gb|AJW77405.1| piwi-like protein 1 [Alitta virens]	0	82	90	0
comp2273385_c0_seq1_m.75218	0.805098	0.997578	0.937526	0.830809	0.794833	0.790142	0.978021	0.889131	ref|XP_009065590.1| hypothetical protein LOTGIDRAFT_207312 [Lottia gigantea] gb|ESO83811.1| hypothetical protein LOTGIDRAFT_207312 [Lottia gigantea]	0	73	86	0
comp2273417_c0_seq5_m.75297	2.81904	1.96014	2.00727	1.90252	1.89484	3.31273	2.07204	2.45696	ref|XP_013781083.1| PREDICTED: ubiquitin-associated protein 2-like isoform X2 [Limulus polyphemus]	3e-28	46	59	11
comp2273519_c1_seq9_m.75533	2.54881	3.82514	3.49989	3.18756	3.30234	3.76796	4.55331	4.20492	gb|ELU01464.1| hypothetical protein CAPTEDRAFT_219353 [Capitella teleta]	3e-75	39	59	3
comp2273576_c0_seq1_m.75622	0.409028	0.512073	0.497031	0.449137	0.474031	NA	NA	NA	gb|ELU04184.1| hypothetical protein CAPTEDRAFT_19821 [Capitella teleta]	0	67	82	0
comp2273595_c0_seq1_m.75667	4.86986	5.27654	5.00027	4.28255	4.03428	5.11465	5.2188	4.91795	ref|XP_013387649.1| PREDICTED: calpain-A-like [Lingula anatina]	0	57	74	6
comp2273599_c0_seq7_m.75677	0.898666	1.16336	1.1581	0.706547	0.763582	1.01781	1.40667	1.37296	ref|XP_013094648.1| PREDICTED: titin-like isoform X1 [Biomphalaria glabrata]	9e-134	35	52	4
comp2273628_c0_seq6_m.75728	0.83196	0.647472	0.661365	0.596905	0.602407	0.85268	0.738672	0.810625	gb|ELT87073.1| hypothetical protein CAPTEDRAFT_173451 [Capitella teleta]	4e-37	49	70	2
comp2273645_c0_seq11_m.75781	5.4729	5.79843	5.66286	6.60929	6.6742	5.33482	5.18905	5.81314	ref|XP_009019711.1| hypothetical protein HELRODRAFT_184984 [Helobdella robusta] gb|ESO02303.1| hypothetical protein HELRODRAFT_184984 [Helobdella robusta]	4e-100	66	79	0
comp2273647_c0_seq2_m.75785	6.48073	7.29636	6.63222	4.47864	4.14877	5.11528	6.5582	6.52209	NA	NA	NA	NA	NA
comp2273765_c1_seq6_m.76032	0.268658	0.44423	0.413898	0.295109	0.317297	0.36206	0.635706	0.580906	ref|XP_011427953.1| PREDICTED: synaptobrevin-like isoform X4 [Crassostrea gigas]	1e-32	89	96	0
comp2273778_c1_seq23_m.76059	2.30595	3.44183	3.37498	2.18965	2.12975	2.54907	3.94669	3.73248	gb|ELU11439.1| hypothetical protein CAPTEDRAFT_171233, partial [Capitella teleta]	0	85	94	0
comp2273813_c0_seq2_m.76128	1.8915	2.36467	2.25114	1.95766	1.84694	2.07697	2.06701	2.00256	ref|XP_005091294.1| PREDICTED: translocon-associated protein subunit alpha-like [Aplysia californica]	3e-80	69	83	1
comp2273845_c0_seq2_m.76206	0.574242	0.525371	0.544727	0.728382	0.694201	NA	NA	NA	gb|ELT89240.1| hypothetical protein CAPTEDRAFT_151096 [Capitella teleta]	0	57	72	2
comp2273865_c0_seq2_m.76255	5.33007	5.7574	5.20259	7.4111	7.2301	5.5693	6.13286	5.85012	gb|ELT92983.1| hypothetical protein CAPTEDRAFT_220507 [Capitella teleta]	0	52	70	1
comp2273900_c0_seq1_m.76336	1.07461	1.02178	1.00387	1.26814	1.28029	2.31411	1.1227	1.36264	ref|XP_013414827.1| PREDICTED: carboxypeptidase E-like [Lingula anatina]	2e-151	58	72	4
comp2273926_c0_seq5_m.76421	13.9609	34.9988	33.3442	14.0343	15.025	14.1419	33.5431	27.9722	gb|ELU08428.1| hypothetical protein CAPTEDRAFT_165811 [Capitella teleta]	0	83	92	0
comp2274031_c0_seq3_m.76707	1.53058	1.64642	1.59631	1.44935	1.40141	1.4673	1.64367	1.40544	gb|AIZ77503.1| enteropeptidase [Platynereis dumerilii]	2e-127	45	62	7
comp2274043_c0_seq7_m.76739	1.13786	0.857341	0.989243	0.854293	0.838464	0.980951	0.8912	0.868001	NA	NA	NA	NA	NA
comp2274096_c1_seq4_m.76855	0.104643	0.129969	0.13111	0.114795	0.120594	0.137839	0.140057	0.124004	ref|XP_013398832.1| PREDICTED: gephyrin-like isoform X2 [Lingula anatina]	0	64	79	0
comp2274106_c1_seq2_m.76871	1.99861	3.54982	3.0995	1.61359	1.46043	2.26129	4.25982	3.53822	NA	NA	NA	NA	NA
comp2274137_c1_seq25_m.76929	2.38979	1.76237	1.63304	3.49863	3.19147	5.50104	2.12632	2.32785	NA	NA	NA	NA	NA
comp2274238_c3_seq9_m.77182	1.87371	1.66407	1.66234	1.86351	1.88218	1.17844	1.64749	1.77435	gb|ELU02931.1| hypothetical protein CAPTEDRAFT_154976 [Capitella teleta]	3e-88	61	69	13
comp2274242_c0_seq2_m.77187	3.24762	2.73908	2.58074	3.10148	3.01751	2.69651	2.3646	2.43774	emb|CFW94196.1| Csa-PI transferase 2, partial [Cupiennius salei]	2e-127	70	82	2
comp2274259_c0_seq1_m.77220	0.742624	0.932329	0.850171	0.748823	0.751177	NA	NA	NA	gb|ELT96452.1| hypothetical protein CAPTEDRAFT_152017 [Capitella teleta]	0	60	73	6
comp2274278_c0_seq6_m.77267	1.74341	1.13621	1.22733	1.32136	1.35494	1.44958	1.13918	1.69228	ref|NP_001086634.1| cAMP-regulated phosphoprotein 19-A [Xenopus laevis] sp|Q6DEB4.1|AR19A_XENLA RecName: Full=cAMP-regulated phosphoprotein 19-A; Short=ARPP-19-A gb|AAH77215.1| MGC79021 protein [Xenop	2e-20	51	63	6
comp2274295_c0_seq2_m.77311	4.61662	7.06425	7.09897	3.10257	3.35253	5.1562	8.61359	7.80178	gb|ELT89877.1| hypothetical protein CAPTEDRAFT_62162, partial [Capitella teleta]	2e-112	50	63	6
comp2274301_c0_seq6_m.77327	7.02391	10.6817	9.06153	8.67262	7.95997	6.8459	9.5425	8.06977	ref|XP_013401271.1| PREDICTED: calpain-5-like isoform X4 [Lingula anatina]	0	57	72	3
comp2274413_c0_seq1_m.77564	0.44725	0.640398	0.684212	0.443569	0.479274	NA	NA	NA	ref|XP_013403660.1| PREDICTED: CKLF-like MARVEL transmembrane domain-containing protein 4 [Lingula anatina] ref|XP_013403661.1| PREDICTED: CKLF-like MARVEL transmembrane domain-containing protein 4 [L	5e-16	54	70	2
comp2274446_c0_seq19_m.77642	0.649098	0.554039	0.626204	0.466075	0.529638	0.55644	0.592535	0.590375	gb|KOF80344.1| hypothetical protein OCBIM_22028019mg [Octopus bimaculoides]	2e-26	31	45	15
comp2274474_c0_seq5_m.77718	2.21795	1.39786	1.4077	1.58729	1.40386	1.31833	1.06764	1.05542	ref|XP_014774568.1| PREDICTED: protein SET-like [Octopus bimaculoides] gb|KOF99580.1| hypothetical protein OCBIM_22014847mg [Octopus bimaculoides]	1e-120	88	93	0
comp2274517_c0_seq1_m.77807	8.6303	10.2627	9.56745	10.9306	10.3289	9.86273	11.9165	10.5957	gb|ELU02469.1| hypothetical protein CAPTEDRAFT_220779 [Capitella teleta]	0	44	65	1
comp2274537_c0_seq28_m.77857	0.924371	0.803114	0.755866	0.661374	1.00056	NA	NA	NA	gb|AIZ77503.1| enteropeptidase [Platynereis dumerilii]	1e-114	43	60	8
comp2274541_c0_seq1_m.77862	9.18642	6.78158	7.4387	4.76276	4.17914	7.2476	7.49595	9.03464	gb|ELU03446.1| hypothetical protein CAPTEDRAFT_227133 [Capitella teleta]	3e-94	32	47	6
comp2274581_c1_seq21_m.92631	2.95996	2.28988	2.38784	2.0674	1.88626	2.45645	2.09355	2.15493	NA	NA	NA	NA	NA
comp2274693_c0_seq1_m.78142	0.531075	0.749772	0.672884	0.622286	0.580873	NA	NA	NA	gb|ELU12886.1| hypothetical protein CAPTEDRAFT_155386 [Capitella teleta]	3e-177	58	74	0
comp2274748_c1_seq11_m.78259	11.4707	10.4625	9.61714	9.41199	9.53727	9.77762	10.0233	9.63894	gb|ELU07215.1| hypothetical protein CAPTEDRAFT_150579 [Capitella teleta]	0	69	82	3
comp2274783_c0_seq9_m.78326	12.8902	12.0336	13.0184	9.53487	9.16458	9.15468	14.0386	13.4357	gb|ELU09307.1| hypothetical protein CAPTEDRAFT_170392 [Capitella teleta]	1e-171	83	92	0
comp2274806_c0_seq1_m.78376	7.84173	8.68378	8.57343	5.18248	5.4376	8.44198	9.33818	8.88116	ref|XP_012945736.1| PREDICTED: titin-like [Aplysia californica]	0	37	53	3
comp2274819_c0_seq2_m.78403	4.20598	3.77781	3.8652	5.97963	5.22562	4.07715	3.42998	3.54534	dbj|BAA86911.1| homologue of Sarcophaga 26,29kDa proteinase [Periplaneta americana]	0	57	71	3
comp2274888_c0_seq2_m.78557	1.47727	1.76186	1.7484	1.20194	1.20005	1.3338	1.80535	1.84304	ref|XP_014767912.1| PREDICTED: kinesin heavy chain isoform X2 [Octopus bimaculoides] gb|KOF94819.1| hypothetical protein OCBIM_22000619mg [Octopus bimaculoides]	0	75	86	1
comp2274909_c0_seq7_m.78613	55.5665	147.179	149.462	42.3945	45.4933	65.4664	220.661	197.392	gb|AHX26698.1| myosin [Platynereis dumerilii]	0	99	99	0
comp2274909_c0_seq7_m.78615	10.8259	30.4219	29.3816	8.79307	9.14428	11.1575	40.4563	30.4377	gb|AHX26698.1| myosin [Platynereis dumerilii]	0	99	99	0
comp2274999_c0_seq4_m.78837	3.84282	5.27241	4.72283	4.93751	4.21481	3.4758	5.15172	4.51808	gb|ACV20871.1| trehalose 6-phosphate synthase [Nilaparvata lugens]	0	57	73	4
comp2275068_c1_seq1_m.78996	10.1318	10.3015	9.90245	11.9193	11.4789	8.46974	9.81481	9.76875	ref|XP_011424321.1| PREDICTED: transitional endoplasmic reticulum ATPase [Crassostrea gigas] gb|EKC25653.1| Transitional endoplasmic reticulum ATPase [Crassostrea gigas]	0	92	97	0
comp2275107_c0_seq4_m.79080	15.8925	12.588	12.9543	11.699	10.7583	11.2772	11.05	11.9777	ref|XP_011490610.1| PREDICTED: plectin-like, partial [Oryzias latipes]	6e-10	22	38	12
comp2275110_c1_seq5_m.79090	4.94356	4.57471	4.28242	8.16767	8.61816	5.51598	4.48508	4.40753	gb|ELT93486.1| hypothetical protein CAPTEDRAFT_177196 [Capitella teleta]	0	86	91	3
comp2275153_c0_seq1_m.79199	3.76919	4.29766	4.29225	3.82369	3.74569	3.30277	4.45334	4.21902	ref|XP_002736701.1| PREDICTED: mitochondrial 10-formyltetrahydrofolate dehydrogenase-like [Saccoglossus kowalevskii]	0	74	87	1
comp2275167_c0_seq1_m.79227	0.701981	0.802097	0.718576	0.68023	0.623389	0.708707	0.780487	0.743312	gb|ELU00048.1| hypothetical protein CAPTEDRAFT_153442 [Capitella teleta]	0	76	90	0
comp2275191_c0_seq1_m.79281	2.08115	2.62526	2.61047	2.38756	2.30557	2.03197	3.03642	2.65677	gb|ELU06197.1| hypothetical protein CAPTEDRAFT_162690 [Capitella teleta]	4e-113	70	81	2
comp2275191_c1_seq2_m.79282	3.39903	4.54249	4.30381	4.0341	4.07437	3.02854	4.46163	4.09176	gb|ELU06197.1| hypothetical protein CAPTEDRAFT_162690 [Capitella teleta]	5e-132	72	88	0
comp2275241_c0_seq5_m.79383	0.330604	0.417865	0.454976	0.312106	0.349716	0.39862	0.432674	0.458794	NA	NA	NA	NA	NA
comp2275266_c0_seq21_m.79421	1.60731	1.35612	1.3516	1.36141	1.39364	1.43218	1.40395	1.56702	ref|XP_013397487.1| PREDICTED: kinesin light chain-like isoform X10 [Lingula anatina]	0	81	90	1
comp2275270_c0_seq2_m.79424	2.79443	2.59047	2.52915	3.4941	3.69436	2.55694	1.99003	2.08525	ref|XP_013413379.1| PREDICTED: glutamine synthetase-like isoform X1 [Lingula anatina]	0	77	86	0
comp2275312_c0_seq8_m.79518	8.19198	7.3933	8.45193	5.73215	5.63794	6.4332	7.24155	8.084	gb|ELU07187.1| hypothetical protein CAPTEDRAFT_98150 [Capitella teleta]	2e-27	64	81	0
comp2275358_c0_seq1_m.79627	1.36892	1.14044	1.11005	1.03666	1.06119	1.86724	1.26894	1.31395	gb|ELT99249.1| hypothetical protein CAPTEDRAFT_221548 [Capitella teleta]	2e-38	56	69	6
comp2275391_c0_seq1_m.79711	0.642742	0.41444	0.432167	0.607992	0.576079	0.947786	0.470453	0.477607	gb|ELU03812.1| hypothetical protein CAPTEDRAFT_199259 [Capitella teleta]	6e-24	53	72	5
comp2275406_c1_seq7_m.79751	4.66665	5.57349	5.42904	5.26582	5.48168	4.28088	6.08118	5.36453	gb|ELU15766.1| hypothetical protein CAPTEDRAFT_148793 [Capitella teleta]	0	79	89	0
comp2275445_c0_seq2_m.79869	3.38639	2.55997	2.6004	2.51761	2.38686	2.20593	2.60145	2.62084	ref|XP_013411035.1| PREDICTED: thioredoxin domain-containing protein 5-like [Lingula anatina]	2e-120	48	62	3
comp2275467_c0_seq60_m.79906	5.01772	5.17377	4.8935	5.69091	5.58777	4.73516	5.04865	4.25679	ref|NP_001191514.1| CaM kinase II alpha [Aplysia californica] gb|ACN43221.1| CaM kinase II alpha [Aplysia californica]	0	96	99	0
comp2275478_c0_seq7_m.79935	2.71165	3.5295	3.17259	3.51824	3.41213	3.9219	3.85441	3.89902	gb|ELU08772.1| hypothetical protein CAPTEDRAFT_165363 [Capitella teleta]	0	77	85	2
comp2275495_c0_seq1_m.79975	1.15583	0.999992	1.12273	1.27949	1.27806	1.10071	0.956427	1.06017	ref|XP_013406466.1| PREDICTED: uncharacterized protein LOC106170945 [Lingula anatina]	6e-106	39	57	12
comp2275508_c1_seq3_m.80009	0.966858	0.701521	0.777215	0.687037	0.629567	0.803612	0.73543	0.738488	gb|ELT94730.1| hypothetical protein CAPTEDRAFT_207988 [Capitella teleta]	5e-34	28	47	15
comp2275523_c0_seq29_m.80039	0.144069	0.23328	0.213452	0.193152	0.194695	0.160089	0.25058	0.223088	ref|XP_001628750.1| predicted protein [Nematostella vectensis] gb|EDO36687.1| predicted protein [Nematostella vectensis]	1e-129	98	100	0
comp2275542_c0_seq9_m.80087	1.13684	0.983306	0.983236	0.784136	0.764386	1.20423	1.02943	1.07539	NA	NA	NA	NA	NA
comp2275610_c0_seq1_m.80236	1.43513	1.52731	1.55313	1.28631	1.3048	1.63062	1.6272	1.61899	gb|ELU14014.1| hypothetical protein CAPTEDRAFT_162815 [Capitella teleta]	0	82	92	1
comp2275616_c0_seq2_m.80253	0.622099	0.810515	0.642441	0.529487	0.446663	0.591901	0.67459	0.675934	ref|XP_012329874.1| PREDICTED: glutamate receptor 4 isoform X3 [Aotus nancymaae]	5e-68	32	53	10
comp2275625_c0_seq11_m.80264	1.38971	0.921157	0.97749	0.95645	0.990036	NA	NA	NA	ref|XP_013399793.1| PREDICTED: uncharacterized protein LOC106165955 isoform X4 [Lingula anatina]	2e-07	38	55	14
comp2275662_c1_seq10_m.80344	3.71608	4.20804	4.11564	2.94848	2.81048	3.46474	4.86943	4.232	gb|ELU09670.1| extended synaptotagmin-like protein 2, partial [Capitella teleta]	0	50	68	7
comp2275674_c1_seq1_m.80370	1.9896	1.2658	1.20191	1.35433	1.30818	2.01732	1.042	1.14546	NA	NA	NA	NA	NA
comp2275698_c0_seq5_m.80432	0.682622	0.609981	0.635641	0.505662	0.550211	0.719015	0.585159	0.641289	gb|KFM79694.1| Cleavage and polyadenylation specificity factor subunit 6, partial [Stegodyphus mimosarum]	2e-48	60	75	6
comp2275701_c1_seq1_m.80440	0.615444	1.13028	1.02669	0.777233	0.706575	1.25317	1.0939	1.15127	gb|AFQ02695.1| bactericidal permeability-increasing protein/lipopolysaccharide-binding protein [Scapharca broughtonii]	1e-44	28	49	4
comp2275714_c2_seq1_m.80469	2.26506	1.6577	1.84508	2.34051	2.68788	2.8644	1.393	1.66791	gb|ELU15642.1| hypothetical protein CAPTEDRAFT_219431 [Capitella teleta]	2e-07	30	45	13
comp2275759_c0_seq17_m.80560	4.12089	3.62911	3.66545	4.24691	4.23666	4.20767	3.2802	3.73954	ref|XP_002733172.1| PREDICTED: inorganic pyrophosphatase-like [Saccoglossus kowalevskii]	5e-130	65	75	1
comp2275822_c0_seq10_m.80745	2.29892	1.74642	1.81072	1.24656	1.29931	2.50626	1.96456	2.1382	gb|ELU18581.1| hypothetical protein CAPTEDRAFT_221829 [Capitella teleta]	3e-23	59	78	1
comp2275841_c0_seq1_m.80783	5.38992	3.17268	3.58185	3.26358	3.27876	3.63026	3.31504	4.16349	ref|XP_013415645.1| PREDICTED: calumenin-B-like [Lingula anatina] ref|XP_013415646.1| PREDICTED: calumenin-B-like [Lingula anatina]	4e-105	54	70	8
comp2275853_c0_seq1_m.80817	2.44458	3.34055	3.35006	2.90431	2.9429	2.01833	3.64938	3.11978	gb|ELU01876.1| hypothetical protein CAPTEDRAFT_220756 [Capitella teleta]	8e-171	67	81	1
comp2275857_c0_seq4_m.80830	2.03091	2.01439	1.98003	2.22083	2.25483	1.79662	1.98438	1.89433	gb|ELU04463.1| hypothetical protein CAPTEDRAFT_162556 [Capitella teleta]	0	66	80	0
comp2275893_c0_seq1_m.80933	1.79559	1.09381	0.977732	2.02542	1.777	2.99243	1.01627	1.09798	sp|P30754.2|CAFF_RIFPA RecName: Full=Fibril-forming collagen alpha chain	2e-14	60	69	0
comp2275905_c0_seq4_m.80965	2.33689	2.07909	2.09396	3.78387	3.41343	2.52994	1.9945	2.19057	gb|ELT94358.1| hypothetical protein CAPTEDRAFT_221292 [Capitella teleta]	5e-140	68	82	1
comp2275933_c0_seq1_m.81045	0.181813	0.270355	0.253059	0.187523	0.180998	0.212163	0.329814	0.30101	ref|XP_013418015.1| PREDICTED: zygotic DNA replication licensing factor mcm6-B-like [Lingula anatina]	0	80	89	1
comp2275974_c0_seq18_m.81146	0.65169	0.758343	0.735506	0.466078	0.451059	0.947307	0.92681	0.976499	gb|ELU13574.1| hypothetical protein CAPTEDRAFT_6610 [Capitella teleta]	2e-38	89	98	0
comp2276031_c0_seq51_m.81296	0.592032	0.766199	0.722916	0.692412	0.641434	0.594283	0.726731	0.668232	gb|ELU04990.1| hypothetical protein CAPTEDRAFT_200421 [Capitella teleta]	3e-109	58	69	11
comp2276035_c1_seq16_m.81307	1.06944	0.727566	0.69678	0.76577	0.756141	1.15427	0.796861	0.755517	gb|ACS36114.1| RNA-binding protein Elav2 [Capitella teleta]	4e-73	61	81	2
comp2276151_c0_seq3_m.81648	0.539618	0.768005	0.70671	0.591076	0.62006	0.720378	0.829718	0.757216	ref|XP_013401957.1| PREDICTED: LOW QUALITY PROTEIN: cullin-associated NEDD8-dissociated protein 1-like [Lingula anatina]	0	76	88	1
comp2276159_c1_seq5_m.81677	6.2316	6.25445	6.5689	5.05995	4.89915	5.71284	6.33491	6.32431	ref|XP_009043624.1| hypothetical protein LOTGIDRAFT_103055 [Lottia gigantea] gb|ESP05079.1| hypothetical protein LOTGIDRAFT_103055 [Lottia gigantea]	1e-53	66	81	1
comp2276160_c0_seq4_m.81678	1.31986	0.96736	1.10105	1.26428	1.07544	1.01274	0.923604	0.934838	ref|XP_009022845.1| hypothetical protein HELRODRAFT_185040 [Helobdella robusta] gb|ESN98907.1| hypothetical protein HELRODRAFT_185040 [Helobdella robusta]	3e-41	61	72	7
comp2276166_c0_seq8_m.81705	0.377192	0.490875	0.472801	0.440579	0.493201	0.385912	0.483926	0.470016	dbj|BAE42496.1| unnamed protein product [Mus musculus]	9e-129	84	93	0
comp2276202_c0_seq3_m.81780	0.685304	0.862385	0.848074	0.906514	0.847225	0.720962	0.933145	0.882935	ref|XP_013785051.1| PREDICTED: isocitrate dehydrogenase [NADP] cytoplasmic-like [Limulus polyphemus]	0	84	92	0
comp2276272_c0_seq2_m.81963	3.66982	4.06519	3.92636	3.22498	3.14953	3.61866	3.90873	4.10981	ref|XP_013418589.1| PREDICTED: 97 kDa heat shock protein-like isoform X1 [Lingula anatina] ref|XP_013418590.1| PREDICTED: 97 kDa heat shock protein-like isoform X2 [Lingula anatina]	0	54	70	3
comp2276277_c0_seq18_m.81972	1.36559	1.42899	1.32413	1.9916	2.11056	1.83816	1.61403	1.75879	ref|XP_014664750.1| PREDICTED: uncharacterized protein LOC106807044 isoform X4 [Priapulus caudatus]	9e-97	34	52	5
comp2276314_c0_seq1_m.82075	0.554384	0.810369	0.768069	0.713109	0.674748	0.564496	0.797524	0.658396	ref|XP_013397030.1| PREDICTED: 26S proteasome non-ATPase regulatory subunit 2-like [Lingula anatina]	0	80	90	1
comp2276377_c0_seq2_m.82218	0.623498	0.661179	0.60287	0.678552	0.695573	0.893663	0.62728	0.605015	gb|ELT89721.1| hypothetical protein CAPTEDRAFT_175992 [Capitella teleta]	2e-139	82	91	1
comp2276389_c1_seq15_m.82250	2.62168	2.07686	2.05777	2.77862	2.7077	2.31344	2.15712	1.74486	gb|ELU02469.1| hypothetical protein CAPTEDRAFT_220779 [Capitella teleta]	2e-25	39	58	3
comp2276413_c0_seq21_m.82313	5.97501	4.88132	4.84942	4.77224	4.70568	5.85373	4.70434	5.59481	ref|XP_013420304.1| PREDICTED: far upstream element-binding protein 1-like isoform X2 [Lingula anatina]	7e-97	60	70	6
comp2276426_c0_seq2_m.82339	32.4256	24.8076	24.6911	20.9442	19.6613	25.8555	21.9726	23.4959	gb|ELU15730.1| hypothetical protein CAPTEDRAFT_156715 [Capitella teleta]	0	72	84	0
comp2276440_c0_seq2_m.82383	1.77104	2.36583	2.13417	1.63148	1.5499	1.57038	2.11929	1.95987	gb|ELT87237.1| hypothetical protein CAPTEDRAFT_224049 [Capitella teleta]	0	58	75	0
comp2276442_c0_seq1_m.82386	12.7919	11.0088	10.7682	9.93838	9.64291	11.7958	10.8862	11.7699	gb|ELU11178.1| hypothetical protein CAPTEDRAFT_157303 [Capitella teleta]	0	63	80	2
comp2276461_c0_seq7_m.82444	0.522722	0.554685	0.465609	0.424002	0.378418	0.657357	0.613571	0.599459	ref|XP_009052399.1| hypothetical protein LOTGIDRAFT_231708 [Lottia gigantea] gb|ESO96904.1| hypothetical protein LOTGIDRAFT_231708 [Lottia gigantea]	9e-14	26	48	6
comp2276491_c0_seq8_m.82522	2.57196	2.35361	2.22027	2.88569	3.05223	2.5529	2.45184	2.20761	gb|ELU06863.1| hypothetical protein CAPTEDRAFT_164782 [Capitella teleta]	0	80	88	0
comp2276498_c2_seq1_m.82546	1.02679	0.893205	0.803799	0.696122	0.572669	1.09271	0.891472	0.737655	ref|WP_026000883.1| peptidase [Pseudoalteromonas sp. NJ631]	1e-44	43	56	10
comp2276523_c0_seq2_m.82609	3.74722	3.4833	3.40203	4.60552	4.93595	3.95065	3.25814	3.17266	ref|XP_011419294.1| PREDICTED: guanine nucleotide-binding protein subunit beta [Crassostrea gigas] ref|XP_011419295.1| PREDICTED: guanine nucleotide-binding protein subunit beta [Crassostrea gigas] gb	0	97	98	0
comp2276528_c1_seq4_m.82615	2.91682	5.56645	5.04184	3.21435	3.24619	3.82596	6.2616	5.38773	ref|XP_012936864.1| PREDICTED: myosin heavy chain, non-muscle isoform X7 [Aplysia californica]	0	66	81	1
comp2276577_c0_seq8_m.92288	4.70197	8.99107	8.5368	5.37735	5.66957	6.00094	9.95016	8.92277	gb|ELU12040.1| hypothetical protein CAPTEDRAFT_168025 [Capitella teleta]	0	84	92	1
comp2276593_c0_seq3_m.82791	1.7798	2.33385	2.28787	2.09208	2.0207	2.06828	2.27934	2.47776	ref|XP_014781857.1| PREDICTED: SCO-spondin-like, partial [Octopus bimaculoides]	0	30	46	10
comp2276634_c1_seq3_m.82935	2.12498	2.26075	2.12187	2.85512	2.75102	1.99934	2.18701	2.02814	gb|ELT93748.1| hypothetical protein CAPTEDRAFT_162708 [Capitella teleta]	4e-157	69	83	0
comp2276648_c1_seq1_m.82962	19.7431	17.4813	18.03	14.9515	14.5199	15.8369	16.8403	17.7983	emb|CAG12424.1| unnamed protein product [Tetraodon nigroviridis]	0	87	95	0
comp2276668_c0_seq1_m.83017	0.611053	0.421348	0.408119	0.417315	0.48429	1.00901	0.531927	0.594783	ref|XP_014787226.1| PREDICTED: YTH domain-containing family protein 2-like isoform X2 [Octopus bimaculoides] gb|KOF67749.1| hypothetical protein OCBIM_22008891mg [Octopus bimaculoides]	3e-150	57	65	12
comp2276719_c0_seq5_m.83124	0.911731	0.713169	0.728186	1.04503	1.00725	0.774079	0.660377	0.682688	gb|ELT87930.1| hypothetical protein CAPTEDRAFT_224291 [Capitella teleta]	3e-80	49	64	4
comp2276741_c0_seq2_m.83166	2.87074	2.70511	2.57251	3.402	3.41738	2.98463	3.00825	2.79334	gb|ELU06331.1| hypothetical protein CAPTEDRAFT_158296 [Capitella teleta]	0	74	83	5
comp2276743_c0_seq1_m.83169	0.85039	1.06793	1.01051	1.17177	1.03342	NA	NA	NA	gb|ELU04682.1| hypothetical protein CAPTEDRAFT_173618 [Capitella teleta]	4e-151	81	92	0
comp2276743_c1_seq1_m.83170	0.879784	1.10478	1.02004	1.11498	0.996464	1.16012	1.19818	1.10547	gb|ELU04682.1| hypothetical protein CAPTEDRAFT_173618 [Capitella teleta]	0	69	83	0
comp2276750_c0_seq1_m.83194	0.447623	0.532011	0.519127	0.750214	0.663968	0.389254	0.557251	0.491687	gb|ELT94448.1| hypothetical protein CAPTEDRAFT_221920 [Capitella teleta]	0	57	72	1
comp2276768_c0_seq2_m.83249	2.01774	1.9672	2.01835	3.25091	3.48555	2.35982	2.13577	2.26451	gb|ELT90070.1| hypothetical protein CAPTEDRAFT_218721 [Capitella teleta]	2e-174	59	71	11
comp2276783_c0_seq3_m.92635	1.20809	1.37351	1.24439	1.09147	1.01633	1.01613	1.2575	1.0573	ref|XP_012265276.1| PREDICTED: cdc42 homolog isoform X1 [Athalia rosae]	3e-119	92	97	0
comp2276804_c0_seq1_m.83376	1.28438	0.908448	0.872131	1.30432	1.17211	1.33104	0.890892	1.0445	gb|ELT93470.1| hypothetical protein CAPTEDRAFT_222901, partial [Capitella teleta]	4e-44	55	68	4
comp2276805_c0_seq8_m.83380	1.43846	2.20887	1.97476	1.2862	1.25355	1.12996	2.0719	1.66832	ref|XP_011413413.1| PREDICTED: reticulon-1-A-like isoform X9 [Crassostrea gigas]	9e-78	64	77	4
comp2276825_c0_seq1_m.83424	4.13292	5.35906	5.3347	4.78092	4.52503	3.83232	5.77382	5.23097	ref|XP_012946471.1| PREDICTED: NAD(P) transhydrogenase, mitochondrial-like [Aplysia californica]	0	78	88	1
comp2276871_c0_seq8_m.83582	0.514381	0.613536	0.52899	0.871667	0.753951	0.433482	0.602744	0.56666	ref|XP_013416110.1| PREDICTED: uncharacterized protein LOC106177775 [Lingula anatina]	1e-146	63	78	1
comp2276936_c0_seq3_m.83786	10.7652	13.3551	14.9596	17.8416	21.6052	12.5769	13.0989	9.21698	sp|P30757.2|H2B_SIPNU RecName: Full=Histone H2B	9e-56	100	100	0
comp2276940_c0_seq2_m.83802	9.10867	9.12876	8.12129	6.251	6.5691	7.23141	8.58426	8.21753	gb|ELT96028.1| hypothetical protein CAPTEDRAFT_227990 [Capitella teleta]	3e-140	40	57	10
comp2276966_c0_seq13_m.83854	3.05961	2.79145	2.75899	2.44851	2.52717	3.33479	2.35343	2.55003	gb|EKC33829.1| Methenyltetrahydrofolate synthetase domain-containing protein [Crassostrea gigas]	2e-95	67	81	0
comp2276968_c0_seq3_m.83862	2.47373	3.13195	2.889	2.77142	2.75349	2.02562	2.88047	2.70376	gb|ELU00418.1| hypothetical protein CAPTEDRAFT_151003 [Capitella teleta]	1e-77	60	69	13
comp2277005_c0_seq3_m.83943	0.460542	0.465048	0.454265	0.592729	0.631158	0.715197	0.553507	0.408236	gb|ELT93466.1| hypothetical protein CAPTEDRAFT_198011 [Capitella teleta]	2e-48	36	49	16
comp2277075_c0_seq2_m.84155	2.49277	2.90311	2.93622	2.76733	2.84808	2.71478	2.83267	2.74358	gb|ELU15049.1| hypothetical protein CAPTEDRAFT_151706 [Capitella teleta]	0	77	88	0
comp2277088_c0_seq32_m.84183	5.16948	5.07685	4.96552	4.27128	3.7372	4.40107	4.79664	4.43604	gb|EKC23604.1| Golgi-associated plant pathogenesis-related protein 1 [Crassostrea gigas]	2e-71	45	58	10
comp2277114_c1_seq1_m.84278	1.32864	2.39368	2.16457	1.81068	1.67577	2.01749	2.61834	2.42978	ref|XP_013381914.1| PREDICTED: ras-related protein Rab-7a [Lingula anatina] ref|XP_013381915.1| PREDICTED: ras-related protein Rab-7a [Lingula anatina] ref|XP_013383898.1| PREDICTED: ras-related prote	7e-133	92	95	0
comp2277132_c1_seq1_m.84335	0.381738	0.443389	0.435598	0.537362	0.545944	NA	NA	NA	ref|XP_006818011.1| PREDICTED: vesicle-fusing ATPase-like, partial [Saccoglossus kowalevskii]	2e-66	56	72	4
comp2277134_c1_seq4_m.84342	1.21182	1.49505	1.42996	1.30758	1.23875	1.25913	1.6453	1.45369	ref|XP_009051939.1| hypothetical protein LOTGIDRAFT_231535 [Lottia gigantea] gb|ESO97339.1| hypothetical protein LOTGIDRAFT_231535 [Lottia gigantea]	0	87	93	0
comp2277142_c0_seq6_m.84365	0.905718	1.27266	1.13592	0.819936	0.789372	0.632675	1.14132	1.00213	gb|ELU12767.1| hypothetical protein CAPTEDRAFT_170444 [Capitella teleta]	0	66	81	0
comp2277203_c0_seq4_m.84565	1.95995	2.19319	2.02416	2.66471	2.78097	1.97238	2.36381	2.16932	gb|ELU03400.1| hypothetical protein CAPTEDRAFT_18069 [Capitella teleta]	0	70	84	1
comp2277282_c0_seq11_m.84762	3.8305	3.91195	3.69292	4.83399	7.15015	4.26258	3.78222	4.07832	gb|ELU11155.1| hypothetical protein CAPTEDRAFT_224256 [Capitella teleta]	2e-52	38	55	3
comp2277311_c0_seq3_m.84858	0.74185	0.904938	0.969211	0.627691	0.618979	0.851496	1.10111	1.10535	ref|XP_013394716.1| PREDICTED: heterochromatin protein 1-binding protein 3-like [Lingula anatina]	3e-53	45	61	14
comp2277312_c0_seq10_m.84862	9.91614	10.8999	9.84879	11.983	11.8076	9.34944	10.835	9.96359	ref|XP_011431808.1| PREDICTED: SUMO-activating enzyme subunit 2-like [Crassostrea gigas] gb|EKC24155.1| SUMO-activating enzyme subunit 2 [Crassostrea gigas]	0	77	87	1
comp2277313_c0_seq3_m.84866	0.677455	0.956423	0.842103	0.944968	0.958302	0.832227	0.945073	0.885764	gb|ELU02909.1| hypothetical protein CAPTEDRAFT_151195 [Capitella teleta]	0	61	76	6
comp2277337_c0_seq4_m.84929	1.1324	1.24394	1.17119	1.49129	1.29218	1.22819	1.60139	1.49001	ref|XP_013386143.1| PREDICTED: putative serine protease K12H4.7 [Lingula anatina]	8e-107	70	81	0
comp2277351_c1_seq2_m.84968	2.79558	3.01052	2.89997	2.56344	2.49493	2.79539	3.09529	2.95464	ref|XP_013397958.1| PREDICTED: prolyl endopeptidase-like isoform X1 [Lingula anatina] ref|XP_013397959.1| PREDICTED: prolyl endopeptidase-like isoform X2 [Lingula anatina] ref|XP_013397960.1| PREDICTE	0	69	85	0
comp2277352_c0_seq3_m.84974	2.46114	2.79575	2.63235	2.0695	2.14549	2.90329	2.81643	2.95689	ref|XP_011428300.1| PREDICTED: uncharacterized protein LOC105328889 isoform X2 [Crassostrea gigas]	4e-116	60	78	1
comp2277374_c0_seq2_m.85051	2.92496	4.88668	4.3489	3.90538	3.75116	2.83573	5.46352	4.92534	gb|AIT70196.1| malate dehydrogenase [Symphyocladia latiuscula]	0	91	96	0
comp2277388_c0_seq8_m.85092	2.42868	2.03172	2.37099	1.75501	1.86514	2.08254	1.95057	2.12178	gb|ELU14547.1| hypothetical protein CAPTEDRAFT_199501 [Capitella teleta]	7e-18	29	48	22
comp2277388_c0_seq8_m.85093	1.75965	1.3405	1.53745	1.13437	1.23253	1.9855	1.34395	1.60426	gb|ELU14547.1| hypothetical protein CAPTEDRAFT_199501 [Capitella teleta]	7e-18	29	48	22
comp2277413_c0_seq4_m.85165	0.597942	0.562689	0.610807	0.506237	0.498194	NA	NA	NA	ref|XP_009028278.1| hypothetical protein HELRODRAFT_180732 [Helobdella robusta] gb|ESN93641.1| hypothetical protein HELRODRAFT_180732 [Helobdella robusta]	3e-41	45	63	2
comp2277416_c0_seq3_m.85174	7.56667	11.6791	11.7439	7.39273	7.33436	7.28011	14.3478	11.5272	gb|ELU07968.1| hypothetical protein CAPTEDRAFT_159946 [Capitella teleta]	0	58	76	2
comp2277475_c0_seq2_m.85365	1.50942	1.41908	1.44937	1.07583	1.15911	1.56849	1.57083	1.63632	ref|XP_005090556.2| PREDICTED: junctophilin-1-like [Aplysia californica]	0	77	88	3
comp2277501_c0_seq23_m.85461	22.1256	23.2762	23.8142	17.0838	18.3986	19.9349	23.4979	20.8619	ref|XP_013063312.1| PREDICTED: filamin-A-like isoform X2 [Biomphalaria glabrata]	0	61	72	8
comp2277505_c0_seq1_m.85479	2.64526	3.00768	3.12768	3.00372	3.04747	2.94896	3.22294	3.13493	gb|ELU10759.1| hypothetical protein CAPTEDRAFT_167427 [Capitella teleta]	0	65	78	2
comp2277605_c1_seq7_m.85828	2.49407	3.40836	3.15492	3.74253	3.44693	2.75909	3.78159	3.20119	gb|ELT95086.1| hypothetical protein CAPTEDRAFT_120382 [Capitella teleta]	0	96	98	0
comp2277617_c1_seq7_m.85877	0.996041	0.811122	0.809611	0.84043	0.907973	1.06674	0.860766	0.91165	ref|XP_013389051.1| PREDICTED: dnaJ homolog subfamily A member 2-like isoform X1 [Lingula anatina] ref|XP_013389052.1| PREDICTED: dnaJ homolog subfamily A member 2-like isoform X2 [Lingula anatina]	3e-121	71	82	1
comp2277675_c0_seq81_m.86041	5.02996	5.5009	5.15452	4.78597	4.72974	5.85504	5.41178	5.28439	gb|ELU05671.1| hypothetical protein CAPTEDRAFT_229021 [Capitella teleta]	0	51	70	1
comp2277680_c0_seq25_m.86056	0.431231	0.347334	0.328602	0.261576	0.280037	0.59957	0.318833	0.399193	gb|KOF93175.1| hypothetical protein OCBIM_22004947mg [Octopus bimaculoides]	5e-153	54	72	3
comp2277722_c0_seq17_m.86189	1.14004	0.959711	0.951311	0.892004	0.880106	1.29048	0.931645	0.963873	ref|XP_013404275.1| PREDICTED: zinc finger RNA-binding protein-like isoform X7 [Lingula anatina]	7e-168	53	62	8
comp2277729_c0_seq10_m.86207	3.10385	3.46713	3.45598	1.94837	2.14892	2.39381	3.72507	3.5628	gb|ELT96013.1| hypothetical protein CAPTEDRAFT_139749 [Capitella teleta]	2e-126	39	56	1
comp2277740_c0_seq2_m.86258	2.92076	2.38762	2.57262	3.11488	3.11354	2.73717	2.27689	2.48629	gb|ELU01555.1| hypothetical protein CAPTEDRAFT_224096 [Capitella teleta]	0	68	82	6
comp2277759_c0_seq3_m.86312	6.27465	8.03689	7.51734	6.85075	6.80335	5.98707	8.24111	7.30846	gb|ELT95920.1| hypothetical protein CAPTEDRAFT_148728 [Capitella teleta]	0	68	83	1
comp2277769_c0_seq5_m.86350	2.33107	2.31306	2.19124	2.6079	2.65305	2.18755	2.28862	2.38348	ref|XP_011428395.1| PREDICTED: V-type proton ATPase subunit B [Crassostrea gigas]	0	92	96	0
comp2277815_c0_seq5_m.86532	1.07669	1.19388	1.08181	1.72669	1.89236	0.983204	1.28551	1.23714	gb|ABJ96343.1| phospholipase C beta [Chaetopterus variopedatus]	0	68	79	4
comp2277815_c1_seq2_m.86535	0.526456	0.617004	0.579115	0.956772	1.04182	0.555877	0.552369	0.527145	gb|ABJ96343.1| phospholipase C beta [Chaetopterus variopedatus]	0	75	87	0
comp2277816_c0_seq2_m.86536	5.96205	5.54097	4.98168	4.53482	4.99752	5.71648	5.56964	4.67784	ref|XP_013396514.1| PREDICTED: sushi, von Willebrand factor type A, EGF and pentraxin domain-containing protein 1-like [Lingula anatina]	0	40	57	4
comp2277869_c0_seq29_m.86707	2.20435	2.26882	2.13232	2.86253	2.97527	2.42776	2.42447	2.18284	ref|XP_009018036.1| hypothetical protein HELRODRAFT_79668 [Helobdella robusta] gb|ESO04100.1| hypothetical protein HELRODRAFT_79668 [Helobdella robusta]	0	78	88	3
comp2277908_c1_seq11_m.86865	3.71975	5.06719	4.87513	5.35925	5.31173	3.9876	6.19431	6.00853	gb|ELT95739.1| hypothetical protein CAPTEDRAFT_164020 [Capitella teleta]	0	82	90	2
comp2277933_c1_seq7_m.86947	3.88181	3.79394	3.66808	2.33447	2.45772	2.93806	3.63692	4.02456	gb|ELT89874.1| hypothetical protein CAPTEDRAFT_223748 [Capitella teleta]	0	63	78	2
comp2277933_c1_seq7_m.86946	28.2444	34.6111	34.7131	17.0586	18.1167	23.9507	35.4935	32.1312	gb|ELT89874.1| hypothetical protein CAPTEDRAFT_223748 [Capitella teleta]	0	63	78	2
comp2277945_c0_seq2_m.86985	8.55639	12.6641	13.0712	5.03291	3.95979	6.9501	12.9694	11.198	ref|XP_013382205.1| PREDICTED: uncharacterized protein LOC106152996 isoform X2 [Lingula anatina]	3e-97	41	53	13
comp2277947_c0_seq1_m.86990	3.32684	2.3138	2.41393	3.45075	3.7324	3.39927	2.02169	2.35844	ref|XP_013407875.1| PREDICTED: guanylate kinase-like isoform X1 [Lingula anatina]	1e-80	60	83	1
comp2277951_c0_seq2_m.87004	0.31228	0.375118	0.368268	0.273692	0.265199	0.469633	0.498171	0.512327	ref|XP_013412809.1| PREDICTED: dynactin subunit 1-like isoform X4 [Lingula anatina]	0	59	77	2
comp2277972_c0_seq17_m.87106	1.847	1.81501	1.83228	2.01903	2.51252	2.11586	1.79456	1.89406	ref|XP_011428772.1| PREDICTED: SCO-spondin-like isoform X2 [Crassostrea gigas]	0	38	51	12
comp2277977_c1_seq3_m.87126	2.85506	2.87523	2.75023	2.37085	2.36034	2.01672	2.64345	2.14249	ref|XP_011417588.1| PREDICTED: GDP-mannose 4,6 dehydratase-like isoform X2 [Crassostrea gigas]	0	79	91	0
comp2277982_c0_seq2_m.87136	0.984759	1.2345	1.15319	1.07548	1.08023	1.00857	1.47129	1.341	gb|ELU06633.1| hypothetical protein CAPTEDRAFT_150189 [Capitella teleta]	0	75	84	5
comp2277995_c0_seq1_m.87177	2.14333	2.91947	2.68025	1.75643	1.87254	2.52658	3.06943	3.14061	NA	NA	NA	NA	NA
comp2278010_c1_seq9_m.87231	5.93776	3.7061	3.7871	4.69628	4.86368	7.31486	3.6197	3.9429	ref|XP_001636101.1| predicted protein [Nematostella vectensis] gb|EDO44038.1| predicted protein [Nematostella vectensis]	5e-44	32	49	12
comp2278012_c0_seq11_m.87235	1.55796	1.74874	1.74764	1.09195	1.10021	2.06659	1.91158	1.95248	ref|XP_011428848.1| PREDICTED: ribosome-binding protein 1-like isoform X11 [Crassostrea gigas]	1e-40	29	55	10
comp2278031_c0_seq2_m.87291	3.34744	3.72694	3.59314	3.89665	4.14157	3.68567	3.87163	3.68663	gb|ELT98600.1| hypothetical protein CAPTEDRAFT_229262 [Capitella teleta]	0	77	87	1
comp2278054_c0_seq40_m.87392	0.352257	0.377181	0.386346	0.250505	0.240902	0.317417	0.401689	0.411998	ref|XP_013397491.1| PREDICTED: kinectin-like [Lingula anatina]	3e-22	42	63	8
comp2278062_c0_seq4_m.87412	3.06371	3.62116	3.36349	4.41492	5.31441	3.63083	3.88429	3.79361	ref|XP_012943795.1| PREDICTED: collagen alpha-3(VI) chain-like isoform X4 [Aplysia californica]	2e-157	28	47	8
comp2278077_c0_seq3_m.87468	0.435621	0.67393	0.630532	0.90465	0.879298	0.494638	0.87361	0.704357	gb|ELT87809.1| hypothetical protein CAPTEDRAFT_215541 [Capitella teleta]	0	41	60	11
comp2278133_c0_seq3_m.87701	2.59462	3.30865	3.04809	3.24888	3.27154	2.39088	3.53197	3.26744	ref|XP_013390907.1| PREDICTED: hexokinase-2-like isoform X2 [Lingula anatina]	2e-173	60	77	1
comp2278161_c0_seq3_m.87805	0.538423	0.618391	0.628026	0.531777	0.486958	0.692751	0.727344	0.789496	ref|XP_013406955.1| PREDICTED: xanthine dehydrogenase-like isoform X1 [Lingula anatina] ref|XP_013406956.1| PREDICTED: xanthine dehydrogenase-like isoform X1 [Lingula anatina]	0	43	62	2
comp2278222_c0_seq3_m.88116	4.3647	3.95518	3.78964	4.63329	4.44185	4.88939	4.2177	4.15482	gb|ELU11155.1| hypothetical protein CAPTEDRAFT_224256 [Capitella teleta]	1e-25	42	61	3
comp2278238_c0_seq6_m.88188	0.66055	0.78809	0.760349	0.799067	0.814382	0.582092	0.879243	0.869386	ref|XP_013420266.1| PREDICTED: rap guanine nucleotide exchange factor 1-like isoform X3 [Lingula anatina]	4e-164	53	65	9
comp2278238_c1_seq2_m.88191	1.83181	1.66858	1.63027	2.02904	2.10279	1.70789	1.42776	1.3519	gb|ELT91292.1| hypothetical protein CAPTEDRAFT_150412 [Capitella teleta]	0	73	88	2
comp2278268_c0_seq9_m.88316	20.1493	21.2578	20.3896	18.1268	17.9709	19.8859	20.8051	20.0069	gb|KOF86747.1| hypothetical protein OCBIM_22017953mg [Octopus bimaculoides]	0	67	79	6
comp2278276_c0_seq16_m.88350	0.517359	0.664135	0.594435	0.545782	0.551099	0.422385	0.656997	0.624153	ref|XP_013378806.1| PREDICTED: nicotinate phosphoribosyltransferase-like [Lingula anatina] ref|XP_013390521.1| PREDICTED: nicotinate phosphoribosyltransferase-like [Lingula anatina]	0	69	83	2
comp2278306_c0_seq2_m.88465	1.80906	2.25646	1.91741	1.71313	1.56657	1.83325	1.98761	1.83749	ref|XP_011444699.1| PREDICTED: CD109 antigen-like isoform X4 [Crassostrea gigas]	0	35	54	7
comp2278308_c1_seq12_m.88483	3.57407	4.07821	3.63033	3.27629	3.16068	2.90373	3.64316	3.36841	gb|ELU07534.1| hypothetical protein CAPTEDRAFT_167979 [Capitella teleta]	0	63	78	3
comp2278333_c0_seq10_m.88591	2.31842	1.81418	1.78957	1.68623	1.71773	NA	NA	NA	gb|KOF82695.1| hypothetical protein OCBIM_22024891mg [Octopus bimaculoides]	1e-113	81	88	4
comp2278362_c0_seq1_m.88712	3.0872	2.68305	2.6658	2.45629	2.36609	3.34994	2.8101	2.8849	ref|XP_011443999.1| PREDICTED: actin-binding LIM protein 1-like [Crassostrea gigas]	3e-53	40	53	13
comp2278363_c0_seq7_m.88713	6.82281	5.64943	5.72896	5.29711	5.52436	6.41293	5.42924	5.5558	ref|XP_013067496.1| PREDICTED: filamin-A-like isoform X1 [Biomphalaria glabrata] ref|XP_013067497.1| PREDICTED: filamin-A-like isoform X1 [Biomphalaria glabrata]	0	48	66	1
comp2278366_c0_seq5_m.88731	5.57547	4.36679	4.10311	4.26296	4.09159	4.61338	3.88938	3.87458	gb|ELT99433.1| hypothetical protein CAPTEDRAFT_120325, partial [Capitella teleta]	0	49	62	8
comp2278376_c0_seq1_m.88768	4.01411	3.76613	3.66051	2.7893	3.00988	3.52036	3.93271	3.90604	gb|ELU05514.1| hypothetical protein CAPTEDRAFT_229048 [Capitella teleta]	0	43	60	5
comp2278378_c0_seq4_m.88778	37.7013	40.8081	39.6998	28.3198	27.2653	28.5424	40.2668	39.2494	gb|ELT93388.1| hypothetical protein CAPTEDRAFT_167027 [Capitella teleta]	0	80	89	0
comp2278405_c0_seq22_m.88893	50.779	60.7019	61.1739	31.2078	33.1993	40.5737	66.8785	60.847	ref|XP_012945736.1| PREDICTED: titin-like [Aplysia californica]	0	32	48	8
comp2278422_c0_seq1_m.89011	3.34795	3.70369	3.67396	4.24277	4.78431	3.66439	4.21536	3.97791	ref|XP_012938709.1| PREDICTED: uncharacterized protein LOC101849054 [Aplysia californica]	2e-79	24	42	14
comp2278454_c0_seq1_m.89160	9.79568	10.3699	10.293	7.40208	8.01321	10.4258	11.6238	11.374	ref|XP_009016785.1| hypothetical protein HELRODRAFT_191479 [Helobdella robusta] gb|ESO04852.1| hypothetical protein HELRODRAFT_191479 [Helobdella robusta]	0	38	57	6
comp2278470_c0_seq2_m.89275	1.04554	1.59621	1.5399	0.99339	1.02778	1.38769	1.82603	1.83216	ref|XP_013398867.1| PREDICTED: hypoxia up-regulated protein 1-like isoform X4 [Lingula anatina]	0	60	76	3
comp2278471_c0_seq8_m.89279	11.0105	14.0586	13.748	12.6627	13.824	11.6756	14.3656	12.9018	gb|ELT95261.1| hypothetical protein CAPTEDRAFT_163682 [Capitella teleta]	0	82	91	0
comp2278474_c0_seq1_m.89294	5.69102	4.35366	4.28006	3.9304	3.95258	7.40671	4.45099	5.3142	gb|ELU14545.1| hypothetical protein CAPTEDRAFT_114151 [Capitella teleta]	8e-36	75	93	0
comp2278480_c0_seq4_m.89330	9.3869	13.9185	12.6732	8.91875	8.33366	8.46188	14.615	12.3871	ref|XP_013410395.1| PREDICTED: spectrin beta chain-like [Lingula anatina]	0	81	90	3
comp2278480_c1_seq1_m.89333	19.4729	25.26	23.4556	16.5096	15.9244	17.1384	25.9986	24.3769	gb|ELT96714.1| hypothetical protein CAPTEDRAFT_148581 [Capitella teleta]	0	73	87	1
comp2278485_c0_seq1_m.89371	0.44215	0.564104	0.554684	0.508959	0.527877	0.546705	0.71358	0.540334	gb|ELU14385.1| hypothetical protein CAPTEDRAFT_224867 [Capitella teleta]	0	52	70	4
comp2278509_c0_seq8_m.89637	4.64977	5.98235	5.57785	3.84818	3.59087	4.28072	6.32882	6.23933	gb|ELU02288.1| hypothetical protein CAPTEDRAFT_227872 [Capitella teleta]	4e-112	38	61	7
comp2278534_c0_seq1_m.89879	2.10994	2.35211	2.22286	1.96808	1.92269	2.05885	2.49224	2.38827	gb|ELU02287.1| hypothetical protein CAPTEDRAFT_213826 [Capitella teleta]	5e-169	46	65	1
comp2278536_c1_seq38_m.89884	0.697059	0.923781	0.819587	0.537255	0.53337	0.854215	1.0173	0.908817	gb|ELT87162.1| hypothetical protein CAPTEDRAFT_194011, partial [Capitella teleta]	5e-20	36	59	1
comp2278554_c0_seq4_m.90013	14.4769	12.096	11.7018	9.79543	9.6562	14.0711	12.3603	12.9508	ref|XP_009010258.1| hypothetical protein HELRODRAFT_166807 [Helobdella robusta] gb|ESO11770.1| hypothetical protein HELRODRAFT_166807 [Helobdella robusta]	1e-19	37	56	12
comp2278587_c0_seq14_m.90327	51.98	53.9589	53.8358	34.7572	36.2853	44.9633	56.353	53.0479	gb|ELT91000.1| hypothetical protein CAPTEDRAFT_196991 [Capitella teleta]	0	62	78	1
comp2278589_c0_seq3_m.90346	5.04994	4.84684	4.58493	4.00009	3.86524	4.45391	4.62433	4.52939	ref|XP_014788861.1| PREDICTED: tensin-3-like [Octopus bimaculoides]	6e-137	65	75	5
comp2278605_c1_seq8_m.90480	3.21415	3.83706	3.56285	2.39487	2.42432	2.73072	4.13087	3.78502	gb|ELU05514.1| hypothetical protein CAPTEDRAFT_229048 [Capitella teleta]	0	47	64	3
comp2278623_c0_seq6_m.90693	2.28408	3.07985	3.05369	2.67486	2.56469	2.57623	3.47101	3.37728	ref|XP_013384335.1| PREDICTED: cytoplasmic dynein 1 heavy chain 1-like [Lingula anatina]	0	78	88	1
comp2278630_c0_seq8_m.90809	3.13666	2.48891	2.44054	2.07989	2.27496	4.33269	2.64729	3.02742	gb|ELU01871.1| hypothetical protein CAPTEDRAFT_220753 [Capitella teleta]	0	49	68	2
comp2279213_c0_seq1_m.91075	6.81312	5.76719	5.30121	8.11947	6.97123	5.7935	5.33382	4.98945	ref|XP_013400372.1| PREDICTED: microfibril-associated glycoprotein 4-like [Lingula anatina]	4e-62	35	59	1
comp2279235_c0_seq1_m.91078	1.59989	1.26734	1.36973	1.57283	1.49728	1.34463	1.08	1.10406	gb|ELT96049.1| hypothetical protein CAPTEDRAFT_223820 [Capitella teleta]	2e-14	38	48	0
comp2279272_c0_seq1_m.91086	3.8815	4.65309	4.36339	4.02576	3.97364	3.67052	3.92982	3.64884	ref|NP_001298665.1| 40S ribosomal protein S4 [Papilio polytes] ref|NP_001299283.1| 40S ribosomal protein S4 [Papilio xuthus] ref|XP_013134411.1| PREDICTED: 40S ribosomal protein S4 isoform X2 [Papilio	9e-158	83	93	0
comp2279297_c0_seq1_m.91091	4.41916	5.1409	4.79887	5.39184	5.29678	4.42893	4.63922	4.52824	gb|ELT87080.1| hypothetical protein CAPTEDRAFT_173459 [Capitella teleta]	0	69	83	0
comp2279340_c0_seq1_m.91103	1.09996	1.87738	1.61836	1.01093	0.966697	1.04942	1.76115	1.43548	NA	NA	NA	NA	NA
comp2279445_c0_seq1_m.91120	1.9939	2.12852	2.1403	1.48132	1.47421	1.24902	1.81822	1.86327	ref|XP_013782205.1| PREDICTED: glutathione peroxidase 7-like [Limulus polyphemus]	6e-46	54	69	1
comp2279450_c0_seq1_m.91124	4.9639	6.27264	6.01931	5.60508	5.39316	4.29011	6.31109	5.3795	gb|ELT89777.1| hypothetical protein CAPTEDRAFT_21487 [Capitella teleta]	0	69	80	0
comp2279523_c0_seq1_m.91136	1.43741	1.10414	1.06866	1.05556	1.04143	0.981271	1.00275	1.1755	gb|ELU14583.1| hypothetical protein CAPTEDRAFT_180537 [Capitella teleta]	0	72	88	0
comp2279536_c0_seq1_m.91140	2.99455	2.19724	2.37801	2.76351	2.36188	2.73775	2.25314	2.15907	ref|XP_013416828.1| PREDICTED: uncharacterized protein LOC106178257 [Lingula anatina]	1e-10	26	44	8
comp2279567_c0_seq1_m.91146	1.23647	1.95247	1.96429	1.83617	1.82999	1.25486	2.03851	1.67045	ref|XP_013382585.1| PREDICTED: NADH-cytochrome b5 reductase 3-like isoform X2 [Lingula anatina]	3e-131	73	86	0
comp2279615_c0_seq1_m.91158	3.9482	3.42111	3.3834	3.48887	3.67868	3.60776	3.29493	3.25559	ref|XP_013416678.1| PREDICTED: LOW QUALITY PROTEIN: probable pyruvate dehydrogenase E1 component subunit alpha, mitochondrial [Lingula anatina]	0	66	79	0
comp2279748_c0_seq1_m.91174	0.960429	0.980228	1.06233	1.19066	1.18611	1.47551	0.898876	0.965158	ref|XP_009025362.1| hypothetical protein HELRODRAFT_163156 [Helobdella robusta] gb|ESN96126.1| hypothetical protein HELRODRAFT_163156 [Helobdella robusta]	1e-51	76	84	0
comp2280178_c0_seq1_m.91219	4.46048	3.10913	3.8995	2.42635	2.80837	3.57038	2.86361	3.51365	NA	NA	NA	NA	NA
comp2280482_c0_seq1_m.91228	1.41834	1.09568	1.1494	1.18753	1.15363	1.79173	1.02652	1.30071	NA	NA	NA	NA	NA
comp2280536_c0_seq1_m.91231	1.2401	1.13432	1.23416	1.59567	1.52085	NA	NA	NA	ref|XP_002998616.1| calmodulin [Phytophthora infestans T30-4] ref|XP_008607073.1| calmodulin [Saprolegnia diclina VS20] ref|XP_008908788.1| calmodulin [Phytophthora parasitica INRA-310] ref|XP_0095399	3e-54	66	80	0
comp2280591_c0_seq1_m.91233	2.64999	3.87301	5.21566	4.59429	4.99687	1.57549	3.40131	3.23427	sp|P13578.1|GLB3_TYLHE RecName: Full=Extracellular globin-2B; AltName: Full=Erythrocruorin; AltName: Full=Extracellular globin IIB	7e-76	76	89	0
comp2280694_c0_seq1_m.91236	3.19553	3.12278	4.64884	3.90388	4.4021	1.71547	3.08634	2.90488	sp|P02220.1|GLB4_TYLHE RecName: Full=Extracellular globin-2C; AltName: Full=Erythrocruorin; AltName: Full=Extracellular globin IIC	2e-67	70	83	0
comp2281676_c0_seq1_m.91255	1.73836	2.56224	3.07669	2.70676	3.19747	1.33038	2.55118	2.02674	sp|P09966.1|GLB2_TYLHE RecName: Full=Extracellular globin-2A; AltName: Full=Erythrocruorin; AltName: Full=Globin IIA	4e-78	80	89	0
comp2287273_c0_seq1_contamination_m.91384	0.677268	0.912057	0.90279	0.862187	0.840684	0.619398	0.905753	0.862575	gb|ERL87495.1| hypothetical protein D910_04887, partial [Dendroctonus ponderosae]	9e-118	99	99	0
comp2347711_c0_seq1_contamination_m.91628	2.2932	1.3453	1.67626	1.4029	1.86465	3.18738	1.38541	1.5109	ref|XP_006222460.1| PREDICTED: histone H3-like [Rattus norvegicus] ref|XP_006254041.1| PREDICTED: histone H3-like [Rattus norvegicus]	3e-92	97	97	0
gene17_m.92593	17.7896	19.5602	19.1948	52.2943	57.959	19.6917	20.3769	20.1693	NA	NA	NA	NA	NA
gi_613484551	3.27806	4.80706	4.32194	3.0147	2.88069	3.10729	5.05471	4.46303	NA	NA	NA	NA	NA
gnl_Pdu_trscr_assembly_1_11607_m.26425	0.136078	0.200698	0.185542	0.15382	0.157485	NA	NA	NA	NA	NA	NA	NA	NA
gnl_Pdu_trscr_assembly_1_1213_m.70099	22.069	18.7193	19.6432	20.9558	19.542	15.0737	16.7048	15.8178	NA	NA	NA	NA	NA
gnl_Pdu_trscr_assembly_1_12794_m.61443	7.26791	13.7732	12.4474	7.49861	6.65018	7.30824	14.4415	12.2992	NA	NA	NA	NA	NA
gnl_Pdu_trscr_assembly_1_14069_m.67140	0.986311	0.762198	0.798931	1.04426	1.06563	0.868865	0.688607	0.70682	NA	NA	NA	NA	NA
gnl_Pdu_trscr_assembly_1_14638_m.60097	10.6985	5.94853	6.87057	7.48575	7.54667	9.87814	6.09624	6.42002	NA	NA	NA	NA	NA
gnl_Pdu_trscr_assembly_1_1512_m.69248	1.79029	1.84837	1.96706	1.57715	1.57809	1.35102	1.78724	1.80199	NA	NA	NA	NA	NA
gnl_Pdu_trscr_assembly_1_1514_m.69841	1.2459	2.155	1.89279	1.59388	1.5853	1.49481	2.26397	2.05874	NA	NA	NA	NA	NA
gnl_Pdu_trscr_assembly_1_15590_m.29311	12.8399	32.8023	31.5144	9.35854	9.94538	13.1317	50.5876	37.7033	NA	NA	NA	NA	NA
gnl_Pdu_trscr_assembly_1_16061_m.43221	21.4017	15.941	16.824	14.194	13.9096	18.0002	15.1096	16.6604	NA	NA	NA	NA	NA
gnl_Pdu_trscr_assembly_1_16296_m.13041	2.67497	1.46989	1.70138	1.88916	1.63061	2.44792	1.35233	1.68059	NA	NA	NA	NA	NA
gnl_Pdu_trscr_assembly_1_1644_m.62862	0.656564	0.677107	0.618944	0.555836	0.560978	0.845603	0.725807	0.761921	NA	NA	NA	NA	NA
gnl_Pdu_trscr_assembly_1_16681_m.81096	13.8956	15.0479	16.1121	11.5893	11.6437	13.9519	17.3409	17.738	NA	NA	NA	NA	NA
gnl_Pdu_trscr_assembly_1_17807_m.62055	1.18399	1.41855	1.40076	1.4116	1.41747	0.898676	1.31758	1.08155	NA	NA	NA	NA	NA
gnl_Pdu_trscr_assembly_1_19681_m.92605	21.0339	25.3545	23.781	25.8975	26.7582	19.2999	27.4471	24.6832	NA	NA	NA	NA	NA
gnl_Pdu_trscr_assembly_1_1986_m.5697	6.80671	6.5127	6.34494	5.36258	5.43983	6.94292	6.73505	6.31441	NA	NA	NA	NA	NA
gnl_Pdu_trscr_assembly_1_1986_m.5698	1.54472	1.1265	1.24802	1.37962	1.41204	1.24509	1.07616	1.22851	NA	NA	NA	NA	NA
gnl_Pdu_trscr_assembly_1_200732_m.91055	8.61408	5.43981	5.083	8.94942	8.63107	12.3073	5.72617	6.00867	NA	NA	NA	NA	NA
gnl_Pdu_trscr_assembly_1_200732_m.91056	3.24436	2.2855	2.16429	3.81125	3.79286	7.56068	2.31546	2.46887	NA	NA	NA	NA	NA
gnl_Pdu_trscr_assembly_1_20144_m.60515	0.65485	0.786458	0.687548	0.886558	0.824416	0.650209	0.895182	0.83477	NA	NA	NA	NA	NA
gnl_Pdu_trscr_assembly_1_2589_m.58494	2.05175	1.49689	1.58158	1.89729	1.88818	1.81023	1.3559	1.47373	NA	NA	NA	NA	NA
gnl_Pdu_trscr_assembly_1_2615_m.68529	3.08275	3.13208	3.02235	4.04646	3.7113	3.40788	2.84721	2.86268	NA	NA	NA	NA	NA
gnl_Pdu_trscr_assembly_1_3048_m.12984	6.76081	8.38612	9.72952	7.503	7.39009	4.5434	10.5216	8.54515	NA	NA	NA	NA	NA
gnl_Pdu_trscr_assembly_1_326_m.78835	18.3776	17.8071	16.8796	13.5216	13.6027	14.6484	15.7638	15.7355	NA	NA	NA	NA	NA
gnl_Pdu_trscr_assembly_1_3867_m.65412	0.976019	2.3644	2.22692	1.17933	1.05311	2.04787	3.21227	3.34633	NA	NA	NA	NA	NA
gnl_Pdu_trscr_assembly_1_4228_m.63259	0.811756	0.589191	0.557657	0.53071	0.548185	NA	NA	NA	NA	NA	NA	NA	NA
gnl_Pdu_trscr_assembly_1_5530_m.58454	12.5904	11.9767	11.8342	8.45933	7.5447	12.5849	11.6832	10.5604	NA	NA	NA	NA	NA
gnl_Pdu_trscr_assembly_1_7274_m.39240	0.510942	0.927433	0.962675	0.726401	0.689386	0.714291	1.16314	1.12679	NA	NA	NA	NA	NA
gnl_Pdu_trscr_assembly_1_7327_m.81715	1.74983	1.0319	1.12221	1.48929	1.40289	1.84358	0.934031	0.933167	NA	NA	NA	NA	NA
gnl_Pdu_trscr_assembly_1_7964_m.49648	10.314	12.4476	12.3916	11.4195	11.0594	9.04566	12.6194	11.3441	NA	NA	NA	NA	NA
gnl_Pdu_trscr_assembly_1_9334_m.28552	6.68829	7.85237	7.74458	5.2856	5.10531	6.3615	8.54765	8.26924	NA	NA	NA	NA	NA
gnl_Pdu_trscr_assembly_1_998_m.15062	13.6152	7.9094	8.77926	11.8026	11.1934	10.1763	7.01302	6.6875	NA	NA	NA	NA	NA
isotig10568_m.92324	8.4643	6.06782	6.97326	3.90598	3.51173	4.02569	4.35853	4.42669	ref|XP_013400827.1| PREDICTED: mammalian ependymin-related protein 1-like isoform X1 [Lingula anatina]	2e-05	31	51	5
tuba_m.92505	12.806	16.7699	14.7431	16.5217	17.2605	13.4328	12.1579	11.4209	ref|XP_002019473.1| GL12416 [Drosophila persimilis] gb|EDW38107.1| GL12416 [Drosophila persimilis]	0	98	99	0
