# Supplementary material for: Combined transcriptome and proteome profiling reveals specific molecular brain signatures for sex, maturation and circalunar clock phase
Source: eLife. 2019 Feb 15;8:e41556. doi: 10.7554/eLife.41556 (PMC6377233; doi:10.7554/eLife.41556)
Supplement: Figure 5—source data 20. — This file contains the IDs, mean expression values, top hit by blastX with e-value cut-off 10-4, e-value corresponding to blast hit, number of identical/ similar AA or gaps in blast alignment ("identity", "positives", "gaps") for all proteins significantly regulated between males and females. [file elife-41556-fig5-data20.xlsx]

## Sheet: 20181212_allSexProtein_meanExpr
Protein.ID	PM_NM_F_mean	PM_NM_M_mean	M_NM_F_mean	M_NM_M_mean	PM_FRFM_F_mean	PM_FRFM_M_mean	Top.hit.ID	E.value	Identity....	Positives....	Gaps....
comp1785956_c0_seq1_m.2259	3.39289	3.16951	3.62753	2.36122	3.31403	2.421	gb|ALO75581.1| hemoglobin subunit A2 [Siboglinum ekmani]	2e-30	40	58	0
comp2232805_c0_seq1_m.23974	3.51833	3.77214	3.68471	5.88384	3.39679	3.51154	gb|ELT87930.1| hypothetical protein CAPTEDRAFT_224291 [Capitella teleta]	1e-91	52	64	4
comp2232909_c0_seq1_m.24034	0.700584	1.47638	0.788827	1.91812	1.00616	2.2043	sp|P02219.1|GLB1_TYLHE RecName: Full=Extracellular globin-1; AltName: Full=Erythrocruorin; AltName: Full=Extracellular globin I prf||0812179A hemoglobin	1e-43	57	71	1
comp2239022_c0_seq1_m.28102	3.39189	3.6698	3.35784	6.21761	3.37357	3.4511	NA	NA	NA	NA	NA
comp2254675_c0_seq1_m.44244	3.56253	3.5821	4.86531	3.58248	3.1428	3.23357	gb|ELU00552.1| hypothetical protein CAPTEDRAFT_227092 [Capitella teleta]	4e-25	45	60	1
comp2260058_c0_seq1_m.51934	6.47254	6.02468	10.553	6.77096	5.14484	5.05757	emb|CAM91762.1| hypothetical protein [Platynereis dumerilii]	1e-119	98	99	0
comp2263011_c0_seq1_m.56689	6.41225	6.12592	9.56872	6.16711	7.18496	7.76684	gb|ELU04621.1| hypothetical protein CAPTEDRAFT_222921 [Capitella teleta]	0	27	45	12
comp2265386_c0_seq2_m.60299	1.91133	2.18687	3.01971	2.79906	1.95742	1.76883	gb|ELT97538.1| hypothetical protein CAPTEDRAFT_176086 [Capitella teleta]	6e-27	32	54	4
comp2272087_c1_seq4_m.72458	2.9886	3.20301	2.9198	2.42535	2.91777	2.74179	ref|XP_009016114.1| hypothetical protein HELRODRAFT_77319 [Helobdella robusta] gb|ESO05481.1| hypothetical protein HELRODRAFT_77319 [Helobdella robusta]	1e-23	42	63	1
comp2274537_c0_seq28_m.77857	0.803114	0.755866	0.661374	1.00056	NA	NA	gb|AIZ77503.1| enteropeptidase [Platynereis dumerilii]	1e-114	43	60	8
comp2277282_c0_seq11_m.84762	3.91195	3.69292	4.83399	7.15015	3.78222	4.07832	gb|ELU11155.1| hypothetical protein CAPTEDRAFT_224256 [Capitella teleta]	2e-52	38	55	3
comp2277972_c0_seq17_m.87106	1.81501	1.83228	2.01903	2.51252	1.79456	1.89406	ref|XP_011428772.1| PREDICTED: SCO-spondin-like isoform X2 [Crassostrea gigas]	0	38	51	12
comp2347711_c0_seq1_contamination_m.91628	1.3453	1.67626	1.4029	1.86465	1.38541	1.5109	ref|XP_006222460.1| PREDICTED: histone H3-like [Rattus norvegicus] ref|XP_006254041.1| PREDICTED: histone H3-like [Rattus norvegicus]	3e-92	97	97	0
gnl_Pdu_trscr_assembly_1_18157_m.24773	1.21406	1.36986	1.29141	1.20498	1.12468	1.00842	NA	NA	NA	NA	NA
gnl_Pdu_trscr_assembly_1_20144_m.60515	0.786458	0.687548	0.886558	0.824416	0.895182	0.83477	NA	NA	NA	NA	NA
gnl_Pdu_trscr_assembly_1_5614_m.48467	1.64279	1.44783	1.46492	1.43082	1.42761	1.33435	NA	NA	NA	NA	NA
gnl_Pdu_trscr_assembly_1_91632_m.21453	8.05797	7.71111	12.6708	7.88593	7.77201	7.62851	NA	NA	NA	NA	NA
