# Supplementary material for: Combined transcriptome and proteome profiling reveals specific molecular brain signatures for sex, maturation and circalunar clock phase
Source: eLife. 2019 Feb 15;8:e41556. doi: 10.7554/eLife.41556 (PMC6377233; doi:10.7554/eLife.41556)
Supplement: Figure 5—source data 21. — This file contains the IDs, mean expression values, top hit by blastX with e-value cut-off 10-4, e-value corresponding to blast hit, number of identical/ similar AA or gaps in blast alignment ("identity", "positives", "gaps") for all proteins significantly regulated between circalunar phases. [file elife-41556-fig5-data21.xlsx]

## Sheet: 20181211_allLunar_meanExpressio
compID	IM_NM_mean	IM_FRFM_mean	PM_NM_F_mean	PM_FRFM_F_mean	PM_NM_M_mean	PM_FRFM_M_mean	Top.hit.ID	E.value	Identity....	Positives....	Gaps....
comp1195281_c0_seq2	17.6458	55.897	60.7588	38.3605	29.9763	25.0844	NA	NA	NA	NA	NA
comp1408528_c0_seq1	33.5501	0.421111	4.47156	17.1987	3.62405	30.5301	NA	NA	NA	NA	NA
comp1903780_c0_seq1	168.685	40.429	122.592	134.371	84.4249	63.3426	NA	NA	NA	NA	NA
comp1963492_c0_seq2	26.4052	1.22976	12.9004	8.68184	9.88984	4.04068	NA	NA	NA	NA	NA
comp2138461_c0_seq1	0.917849	2.03182	5.07973	39.4865	2.21503	4.7717	gb|EGJ28961.1| cation/multidrug efflux pump [Moorea producens 3L]	5e-05	49	56	3
comp2142030_c0_seq1	276.956	283.74	354.391	121.459	251.549	102.417	NA	NA	NA	NA	NA
comp2166111_c0_seq1	39.021	0.973704	2.64932	1.92511	0.886455	1.58783	NA	NA	NA	NA	NA
comp2188826_c0_seq1	37.0713	2.97806	1.56678	72.4759	3.91323	3.04887	ref|XP_013071443.1| PREDICTED: uncharacterized protein LOC106058534, partial [Biomphalaria glabrata]	6e-72	31	50	13
comp2197726_c1_seq1	6.81908	5.6403	2.68958	3.36972	124.761	12.3002	NA	NA	NA	NA	NA
comp2198620_c0_seq1	0.39406	13.2109	4.05127	5.2485	4.31457	2.89179	NA	NA	NA	NA	NA
comp2201951_c0_seq1	29.6225	4.65921	1.50775	51.7691	0.571943	2.22532	ref|XP_014679242.1| PREDICTED: uncharacterized protein LOC106819095 isoform X2 [Priapulus caudatus]	2e-100	51	67	6
comp2208315_c0_seq1	1.43203	29.5214	6.87707	12.3178	11.6284	2.62639	NA	NA	NA	NA	NA
comp2220443_c0_seq2	56.0641	0.286337	11.8614	12.2515	2.26395	24.8213	NA	NA	NA	NA	NA
comp2220733_c0_seq1	50.24	9.17706	22.8525	38.2823	21.3646	45.4835	ref|XP_008027550.1| hypothetical protein SETTUDRAFT_154665 [Setosphaeria turcica Et28A] gb|EOA85067.1| hypothetical protein SETTUDRAFT_154665 [Setosphaeria turcica Et28A]	7e-05	30	44	14
comp2235289_c1_seq1	229.552	30.8782	181.511	233.83	237.925	479.916	NA	NA	NA	NA	NA
comp2237921_c0_seq1	66.1929	15.6797	22.8079	50.2881	30.4711	32.5332	ref|XP_002613230.1| hypothetical protein BRAFLDRAFT_73168 [Branchiostoma floridae] gb|EEN69239.1| hypothetical protein BRAFLDRAFT_73168 [Branchiostoma floridae]	1e-12	34	58	1
comp2240117_c2_seq2	4.81812	23.206	14.0431	14.0924	11.1362	11.9755	NA	NA	NA	NA	NA
comp2242774_c0_seq2	3.17656	0	2.07744	1.78326	3.92314	0.971068	NA	NA	NA	NA	NA
comp2245060_c0_seq2	1524.07	252.941	1360.05	1032.8	868.227	949.365	NA	NA	NA	NA	NA
comp2246178_c0_seq1	35.7724	192.03	23.1172	33.2656	24.3654	32.7907	gb|ELT95476.1| hypothetical protein CAPTEDRAFT_21103 [Capitella teleta]	2e-15	71	87	0
comp2246430_c0_seq1	3.37995	68.3519	27.9181	39.5475	24.785	8.09782	gb|ELU07389.1| hypothetical protein CAPTEDRAFT_21345 [Capitella teleta]	1e-119	67	80	0
comp2246635_c0_seq1	44.0578	170.695	277.457	173.068	193.229	122.918	NA	NA	NA	NA	NA
comp2247432_c0_seq1	11.1792	16.5188	15.0921	12.1384	284.104	22.9368	ref|XP_012937090.1| PREDICTED: receptor-type tyrosine-protein phosphatase T-like [Aplysia californica]	6e-25	38	46	17
comp2251281_c0_seq2	1.23345	16.1394	12.4008	16.2694	15.4376	4.03706	NA	NA	NA	NA	NA
comp2253656_c0_seq3	1589.55	534.215	969.806	931.81	836.999	1287.81	NA	NA	NA	NA	NA
comp2253903_c0_seq1	751.243	139.923	260.251	360.759	270.266	569.143	gb|ELT91521.1| hypothetical protein CAPTEDRAFT_222069 [Capitella teleta]	2e-28	41	68	0
comp2254040_c0_seq2	45.6589	5.27613	23.7693	23.1566	8.39266	43.1343	NA	NA	NA	NA	NA
comp2254293_c0_seq3	59.764	5.01317	11.7028	11.9328	4.64628	23.0113	gb|AJQ21527.1| MytiLec 3 [Mytilus galloprovincialis]	1e-26	28	50	6
comp2254399_c0_seq2	85.1496	4.29584	95.8088	95.5671	26.8153	61.2381	NA	NA	NA	NA	NA
comp2254399_c1_seq1	217.554	0.892585	260.594	138.235	34.1233	150.641	NA	NA	NA	NA	NA
comp2255166_c0_seq2	127.93	42.9926	116.611	79.1906	98.4111	67.8045	NA	NA	NA	NA	NA
comp2255762_c0_seq2	15.2044	51.221	27.3065	21.6424	25.4737	15.1245	gb|ELU10507.1| hypothetical protein CAPTEDRAFT_223807 [Capitella teleta]	2e-21	38	55	5
comp2256048_c0_seq1	9.37892	47.6454	22.4128	25.1915	17.6301	6.20311	NA	NA	NA	NA	NA
comp2258272_c0_seq1	43.7908	10.4376	26.8478	22.8176	26.4885	33.1069	ref|XP_011442406.1| PREDICTED: RNA-directed DNA polymerase from mobile element jockey-like [Crassostrea gigas]	4e-178	51	70	2
comp2258476_c0_seq2	4.09095	46.0803	54.1368	14.4659	80.2535	13.4781	ref|XP_009048806.1| hypothetical protein LOTGIDRAFT_157977 [Lottia gigantea] gb|ESP00687.1| hypothetical protein LOTGIDRAFT_157977 [Lottia gigantea]	1e-42	33	50	5
comp2258926_c0_seq3	450.768	71.2406	315.071	272.722	178.134	442.27	NA	NA	NA	NA	NA
comp2260220_c0_seq4	74.1871	13.9481	10.802	22.9334	20.732	13.4869	ref|WP_052530499.1| hypothetical protein [Kineosporia aurantiaca]	2e-12	67	83	0
comp2263873_c0_seq9	3215.88	1605.94	2817.04	1509.51	2855.17	644.631	ref|XP_009058449.1| hypothetical protein LOTGIDRAFT_233585 [Lottia gigantea] gb|ESO90793.1| hypothetical protein LOTGIDRAFT_233585 [Lottia gigantea]	3e-08	29	44	11
comp2263897_c0_seq7	1525.65	151.564	201.812	213.148	225.906	282.982	ref|XP_001632823.1| predicted protein [Nematostella vectensis] gb|EDO40760.1| predicted protein [Nematostella vectensis]	1e-72	56	74	0
comp2264237_c0_seq1	120.217	118.09	205.202	155.287	286.429	64.047	NA	NA	NA	NA	NA
comp2264652_c0_seq2	75.3483	198.542	120.919	121.256	140.805	85.9041	NA	NA	NA	NA	NA
comp2265395_c0_seq1	57.945	17.8365	32.0468	33.3435	43.7259	70.0647	ref|XP_011440540.1| PREDICTED: uncharacterized protein LOC105337509 isoform X1 [Crassostrea gigas]	6e-25	32	50	12
comp2266802_c0_seq7	660.924	704.765	853.453	338.401	906.939	260.444	ref|XP_009063870.1| hypothetical protein LOTGIDRAFT_210838 [Lottia gigantea] gb|ESO85629.1| hypothetical protein LOTGIDRAFT_210838 [Lottia gigantea]	1e-58	39	59	2
comp2267178_c1_seq2	23.3488	61.2559	40.991	38.7166	29.4167	35.7197	NA	NA	NA	NA	NA
comp2267334_c0_seq1	1.21417	14.8507	5.27554	3.19884	10.4133	1.58783	ref|XP_002607460.1| hypothetical protein BRAFLDRAFT_69892 [Branchiostoma floridae] gb|EEN63470.1| hypothetical protein BRAFLDRAFT_69892 [Branchiostoma floridae]	5e-33	35	54	3
comp2267365_c0_seq1	14.5402	11.4695	5.70844	4.92133	60.6473	7.98061	ref|XP_014672517.1| PREDICTED: receptor-type guanylate cyclase gcy-1-like [Priapulus caudatus]	5e-135	33	52	11
comp2267733_c0_seq1	13993.8	4707.26	13962.7	13976.6	12778.9	19357	NA	NA	NA	NA	NA
comp2268067_c0_seq1	125.095	310.705	211.159	224.333	208.163	144.76	ref|XP_013402299.1| PREDICTED: 26S proteasome non-ATPase regulatory subunit 5-like isoform X1 [Lingula anatina]	1e-126	41	65	0
comp2268190_c1_seq4	41.6765	4.25818	71.8412	35.2946	24.926	32.6528	NA	NA	NA	NA	NA
comp2269061_c0_seq1	101.666	304.141	125.636	165.905	127.529	104.235	gb|ELU06077.1| hypothetical protein CAPTEDRAFT_83097, partial [Capitella teleta]	5e-115	39	56	2
comp2269180_c0_seq3	12.4156	78.1243	35.5668	33.5724	35.797	16.5908	ref|XP_014670880.1| PREDICTED: uncharacterized protein LOC106811689 [Priapulus caudatus]	9e-31	40	60	2
comp2272226_c1_seq1	207.54	53.649	80.4672	116.702	75.0495	121.274	NA	NA	NA	NA	NA
comp2273146_c0_seq2	41.2639	109.768	46.2169	43.3742	46.9012	57.5044	ref|XP_003199161.1| PREDICTED: uncharacterized protein K02A2.6-like [Danio rerio]	0	58	74	1
comp2273570_c0_seq3	229.314	423.13	355.486	373.171	375.437	299.065	ref|XP_013402319.1| PREDICTED: uncharacterized protein LOC106167958 isoform X1 [Lingula anatina]	2e-115	31	52	14
comp2273750_c0_seq2	3331.95	6149.26	3895.93	4199.74	4390.55	3946.56	NA	NA	NA	NA	NA
comp2274417_c0_seq2	719.751	2557.96	2364.01	1961.52	2166.27	1697.63	ref|XP_005995541.1| PREDICTED: docking protein 6 isoform X1 [Latimeria chalumnae]	9e-52	42	58	6
comp2276727_c0_seq2	26.2129	30.3489	17.6388	22.4241	223.563	43.134	ref|XP_002733692.2| PREDICTED: atrial natriuretic peptide receptor 1-like [Saccoglossus kowalevskii]	0	37	55	7
comp2277009_c0_seq3	35.463	85.9153	49.6152	46.527	39.7595	31.9873	NA	NA	NA	NA	NA
comp2277216_c1_seq2	137.63	39.1294	65.6318	90.0228	67.3511	133.779	NA	NA	NA	NA	NA
comp2280693_c0_seq1	1.60823	1.16213	2.53186	153.662	38.9492	1.43141	NA	NA	NA	NA	NA
comp2282832_c0_seq1	32.2601	1400.84	43.919	42.017	40.9211	35.2452	gb|ACT88135.1| GH20886p [Drosophila melanogaster]	3e-69	100	100	0
gnl|Pdu_trscr_assembly_1|159181	8.17089	4.48804	28.3182	183.61	7.59283	22.4515	NA	NA	NA	NA	NA
gnl|Pdu_trscr_assembly_1|7217	858.53	1662.93	1222.85	1545.9	1273.34	1229.69	NA	NA	NA	NA	NA
