# Supplementary material for: Combined transcriptome and proteome profiling reveals specific molecular brain signatures for sex, maturation and circalunar clock phase
Source: eLife journal article supplement (doi:10.7554/elife.41556), 2019-02-15
Supplement: figures [file elife-41556-figures-v2.pdf]

---

## Figures and figure supplements

Combined transcriptome and proteome profiling reveals specific molecular brain signatures for sex, maturation and circalunar clock phase

**Sven Schenk *et al***

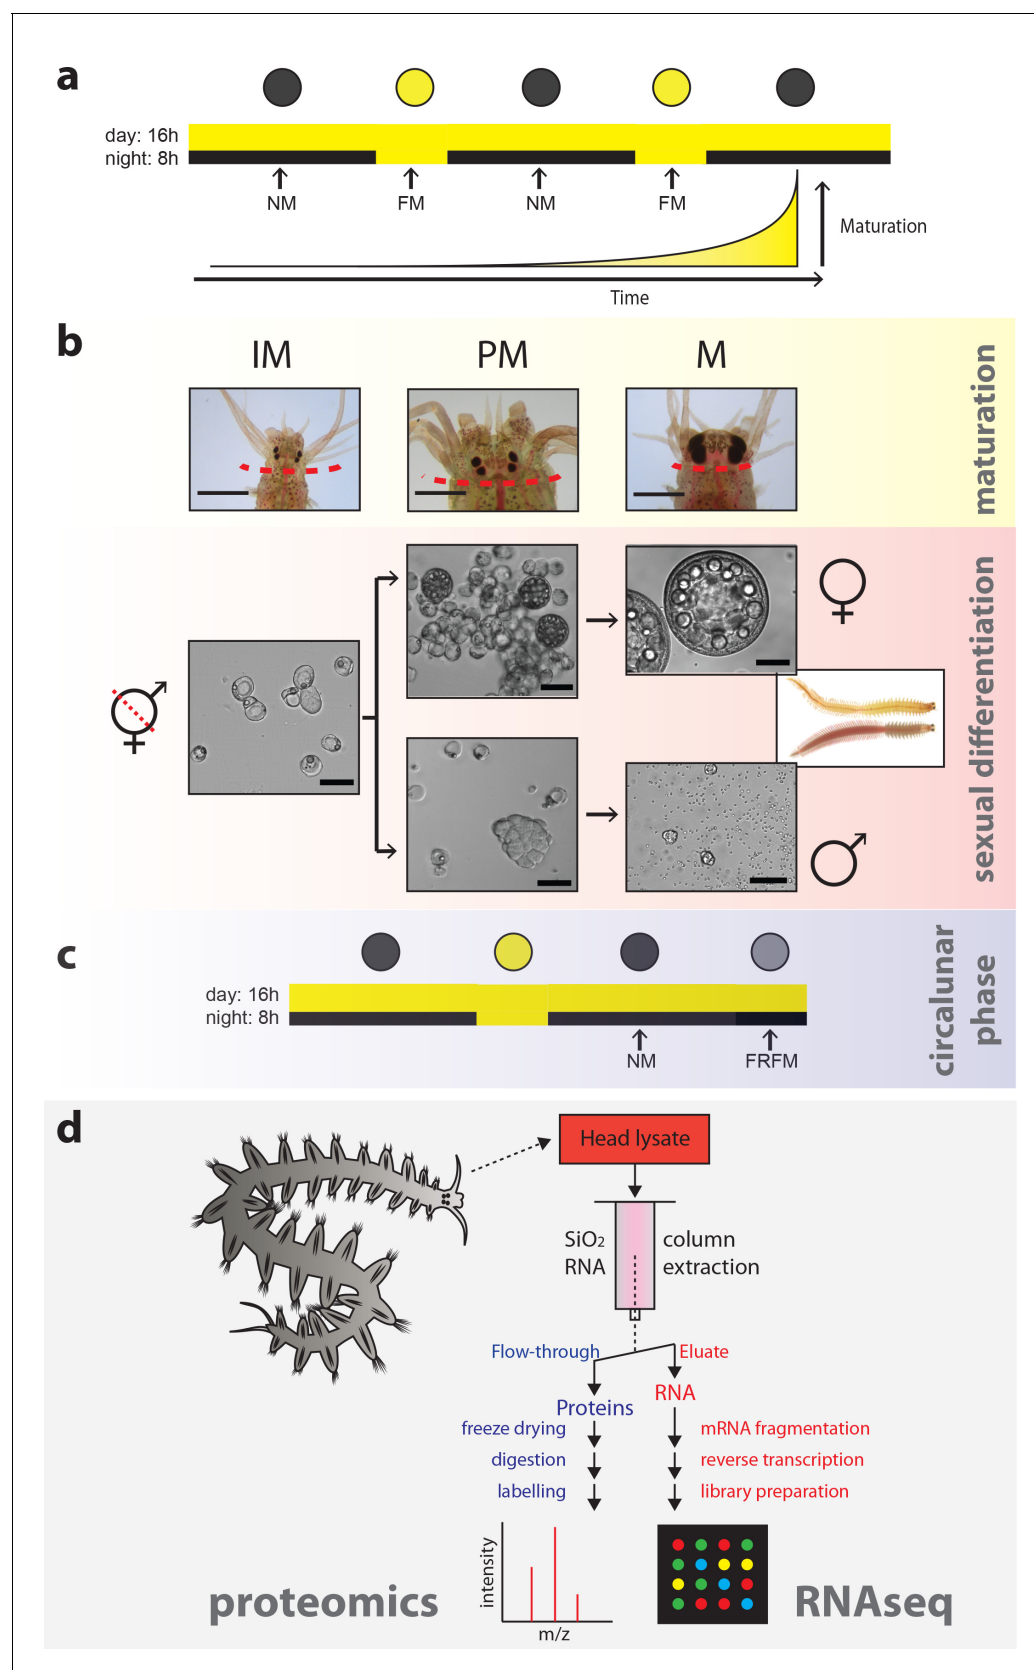

**Figure 1.** Strategy to capture the impact of maturation, sex and circalunar phase on the head transcriptome and proteome of *Platynereis dumerilii*. (a) Light regime of the *Platynereis* culture and its correlation with maturation; daily and nocturnal light conditions are schematised. Eight consecutive Figure 1 continued on next page

*Figure 1 continued*

nights with nocturnal light per month provide a simplified 'full moon' (FM) stimulus, alternating with dark nights ('new moon'/NM) (intensity and spectra see **Figure 1—figure supplement 2a–d**). (b) Representative images of the different animal stages relevant for the study: IM - immature; PM - premature; M - mature. Top row: overview of heads at the respective stage; dotted line: cut site for head sampling. scale bars: 1 mm. Lower rows: representative microscopic images of coelomic cells used to diagnose each stage. Whereas immature animals display essentially only eleocytes (left), premature animals (middle) show eleocytes as well as germ cells (oocytes and spermatogonia, respectively). In mature animals (right), oocytes have reached their full size of ~180 µm in females, and male spermatogonia have differentiated into spermatozoa. Scale bars: 50 µm. (c) Scheme illustrating the two distinct circalunar phases used for sampling; NM = New Moon; FRFM = Free Running Full Moon (**Zantke et al., 2014; Zantke et al., 2013**). (d) Schematic flow chart of the newly developed protocol, allowing to profile the proteome and corresponding transcriptome of each sample.

DOI: <https://doi.org/10.7554/eLife.41556.003>

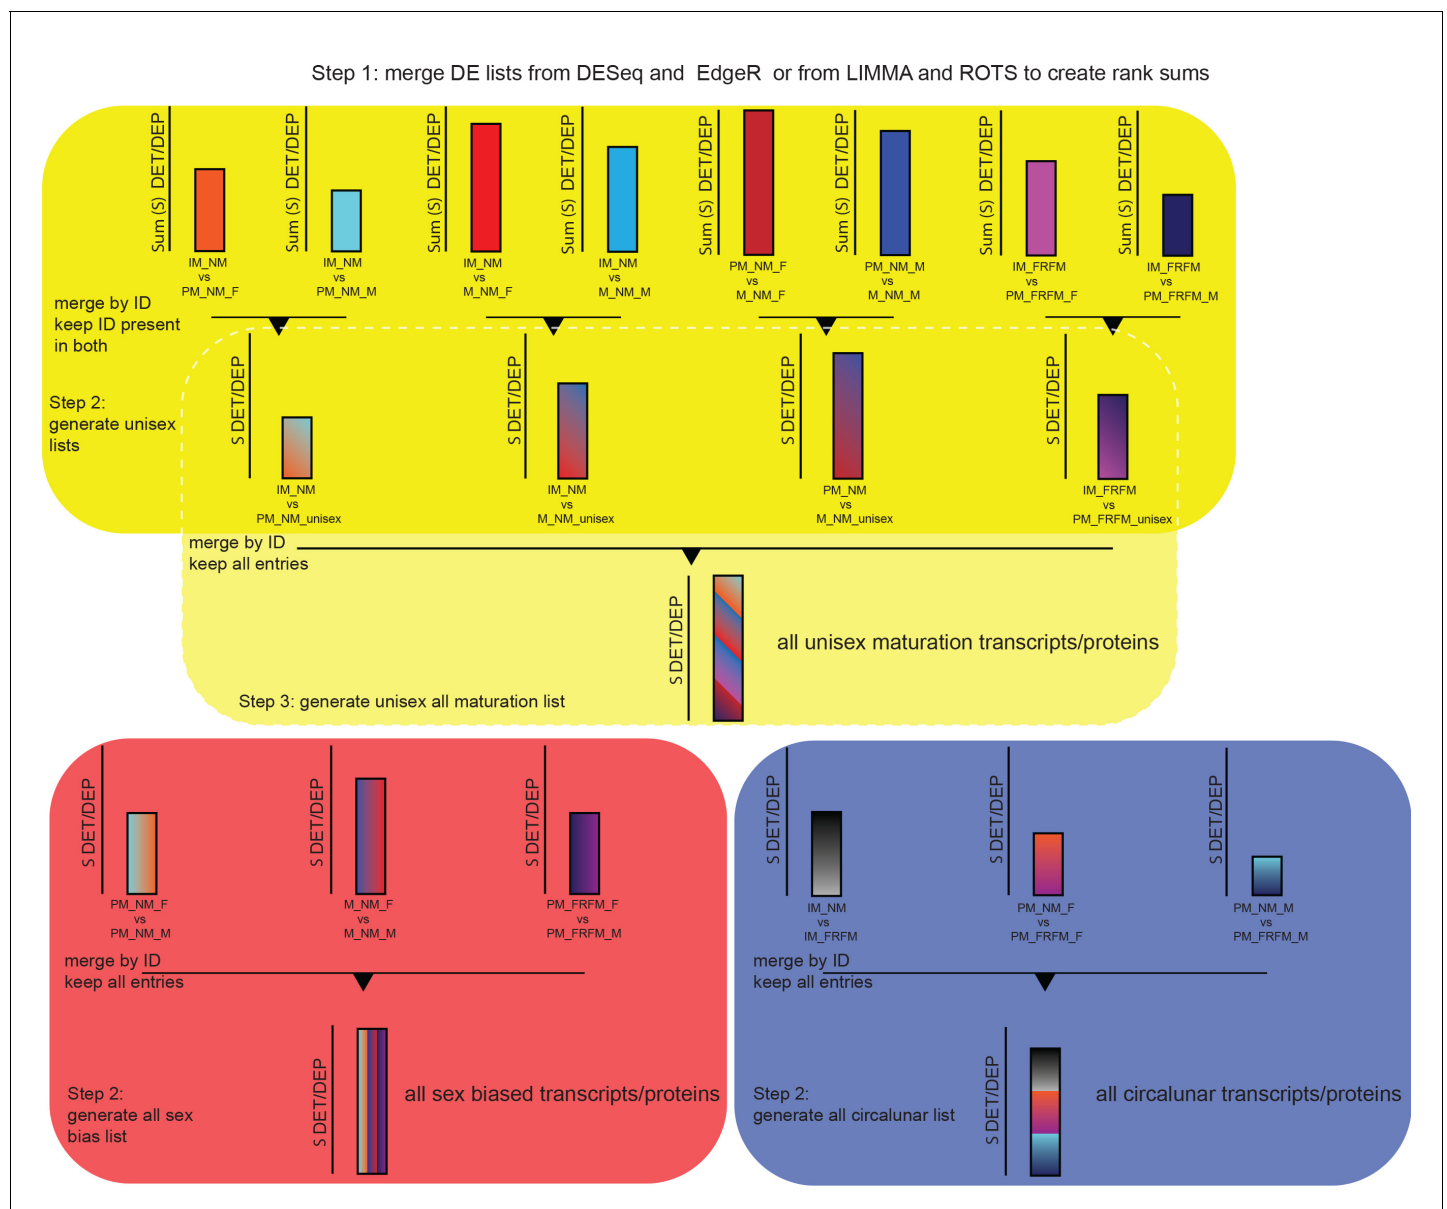

**Figure 1—figure supplement 1.** Schematic of representation of the strategy for the generation of the maturation, sex and lunar transcript/proteome regulated lists. Step1 involves the generation of DESeq-EdgeR or ROTS-LIMMA rank sum lists for each of the 14 comparisons as outlined in the Materials and methods section. Step **two** is different for sex biased and circularar transcripts/proteins on the one hand and for maturation on the other hand. For sex and lunar transcripts/proteins this step consists of subsequently merging the three individual comparisons - PM\_NM\_F vs. PM\_NM\_M, M\_NM\_F vs. M\_NM\_M and PM\_FRFM\_F vs. PM\_FRFM\_M for sex biased transcripts/proteins; and IM\_NM vs. IM\_FRFM, PM\_NM\_F vs. PM\_FRFM\_F and PM\_NM\_M vs. PM\_FRFM\_M for the lunar comparison - and keeping all entries in the final lists resulting in the final sex biased and circularar transcript/proteome lists. For the maturation comparison step two is the generation of 'unisex' lists for the different developmental comparisons, for example out of the two IM\_NM vs. PM\_NM comparisons, IM\_NM vs. PM\_NM\_F and IM\_NM vs. PM\_NM\_M a single IM\_NM vs. PM\_NM list is build. To achieve this, the respective lists are merged by ID as above, but only IDs present in *both* initial lists are kept. This eliminates transcripts/proteins called DE in only one sex, however, entries regulated differently between sexes and called DE between two developmental stages are retained (see overlap between maturation and sex bias in **Figures 3a** and **5a**, respectively). Step three only applies to the maturation comparison: In this step the four 'unisex' lists, IM\_NM vs. PM\_NM, IM\_NM vs. M\_NM, PM\_NM vs. M\_NM and IM\_FRFM vs. PM\_FRFM, are merged by ID and all entries are kept in the final list, as described for step two for the sex and lunar list. The resulting list contains all maturation transcripts/proteins.

DOI: <https://doi.org/10.7554/eLife.41556.004>



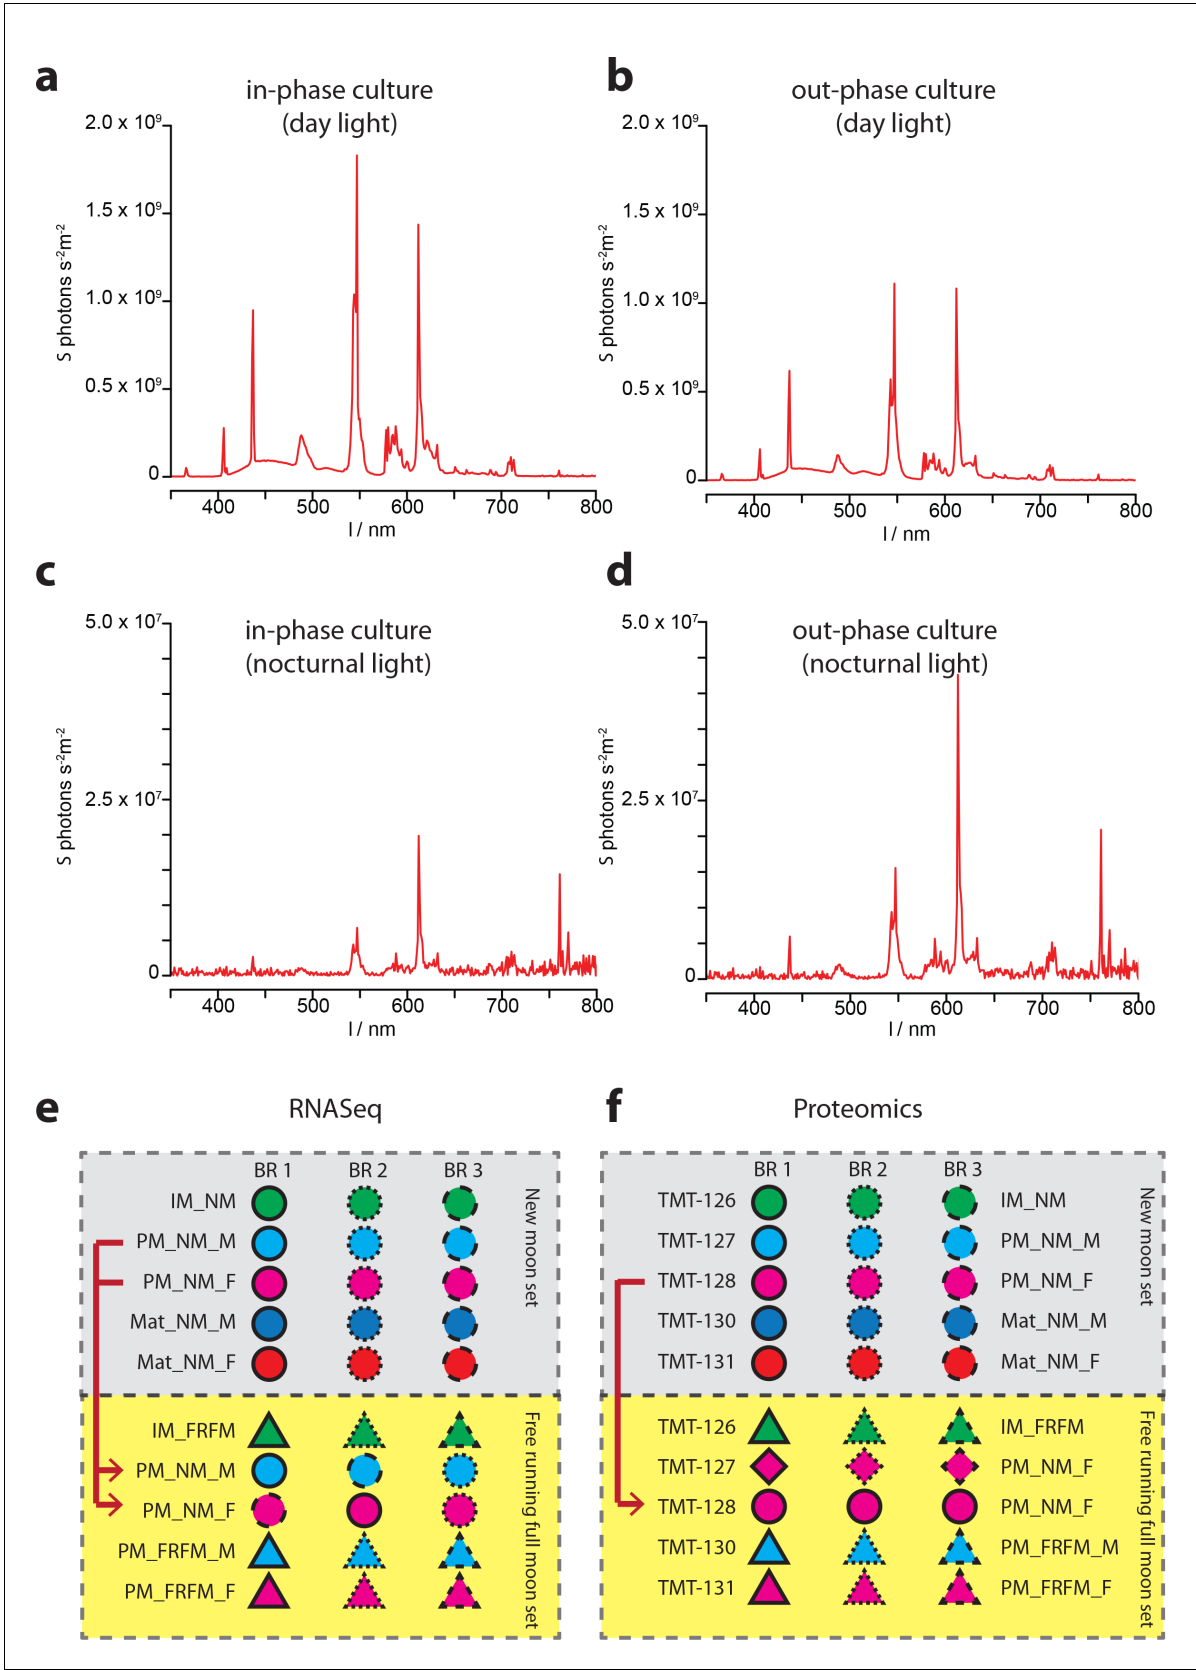

**Figure 1—figure supplement 2.** Ambient light conditions and overview over the multiplexing strategies employed for transcriptomic and proteomic analyses. (a–d) Representative illumination profiles of the worm culture rooms at different lunar phases. (a) Light spectrum of the ‘inphase culture room’

Figure 1—figure supplement 2 continued on next page

Figure 1—figure supplement 2 continued

during day. (b) Light spectrum of the 'outphase culture room' during day. (c) Nocturnal light spectrum 'inphase room' under Full-moon conditions (FM). (d) Nocturnal light spectrum 'outphase room' under FM conditions. (e) Schematic overview of the multiplexing strategy applied for RNA-Seq; (f) respective overview of the multiplexing strategy for proteomics. In (e,f), red arrows denote NM samples run as technical replicates in the FRFM transcriptome sequencing and proteome measurements.

DOI: <https://doi.org/10.7554/eLife.41556.005>

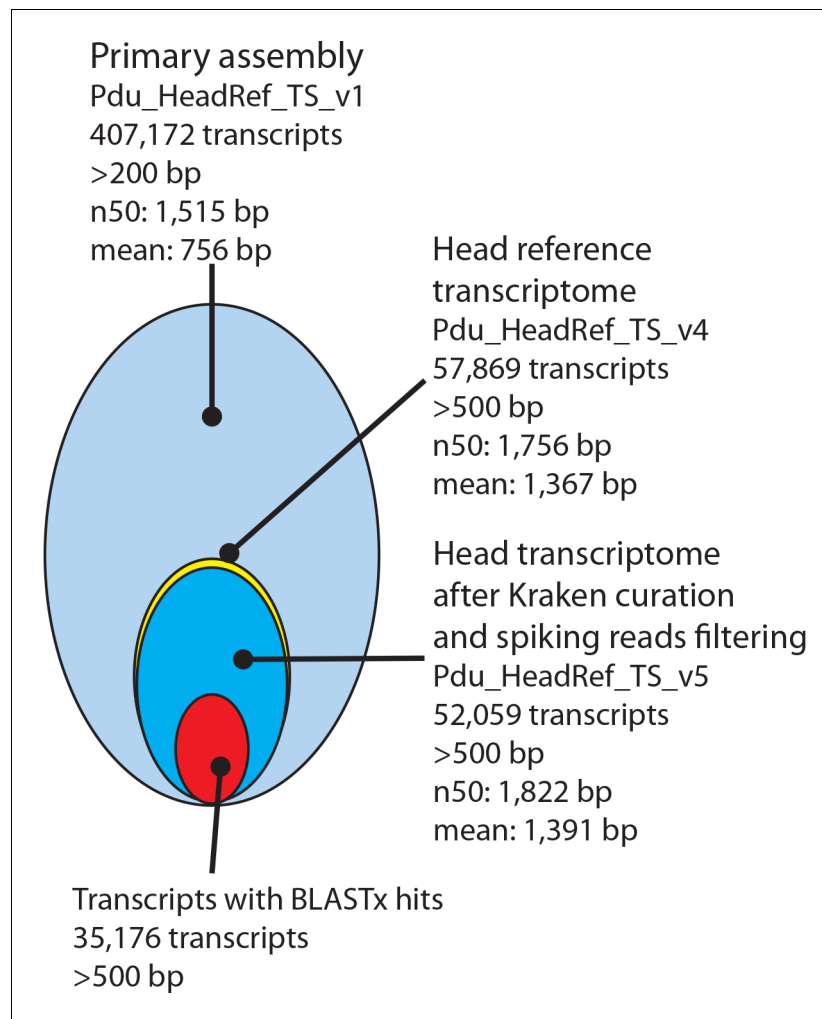

**Figure 2.** Processing and basic features of the *Platynereis* head transcriptome. The primary assembly consisting of 407,172 transcripts with >200 bp was successively processed by: i) collapsing multi-copy transcripts to the longest transcripts of each cluster, ii) removing transcripts shorter than 500 bp, iii) removing transcripts arising from common model organisms or potential food sources, iv) substituting less complete transcripts with previously published sequences from NCBI and the transcriptome published by *Conzelmann et al. (2013)*, and v) adding missing sequences from NCBI. In total 35,176 Pdu\_HeadRef\_TS\_v5 sequences have BLASTx hits against the NCBI nr- database.

DOI: <https://doi.org/10.7554/eLife.41556.008>

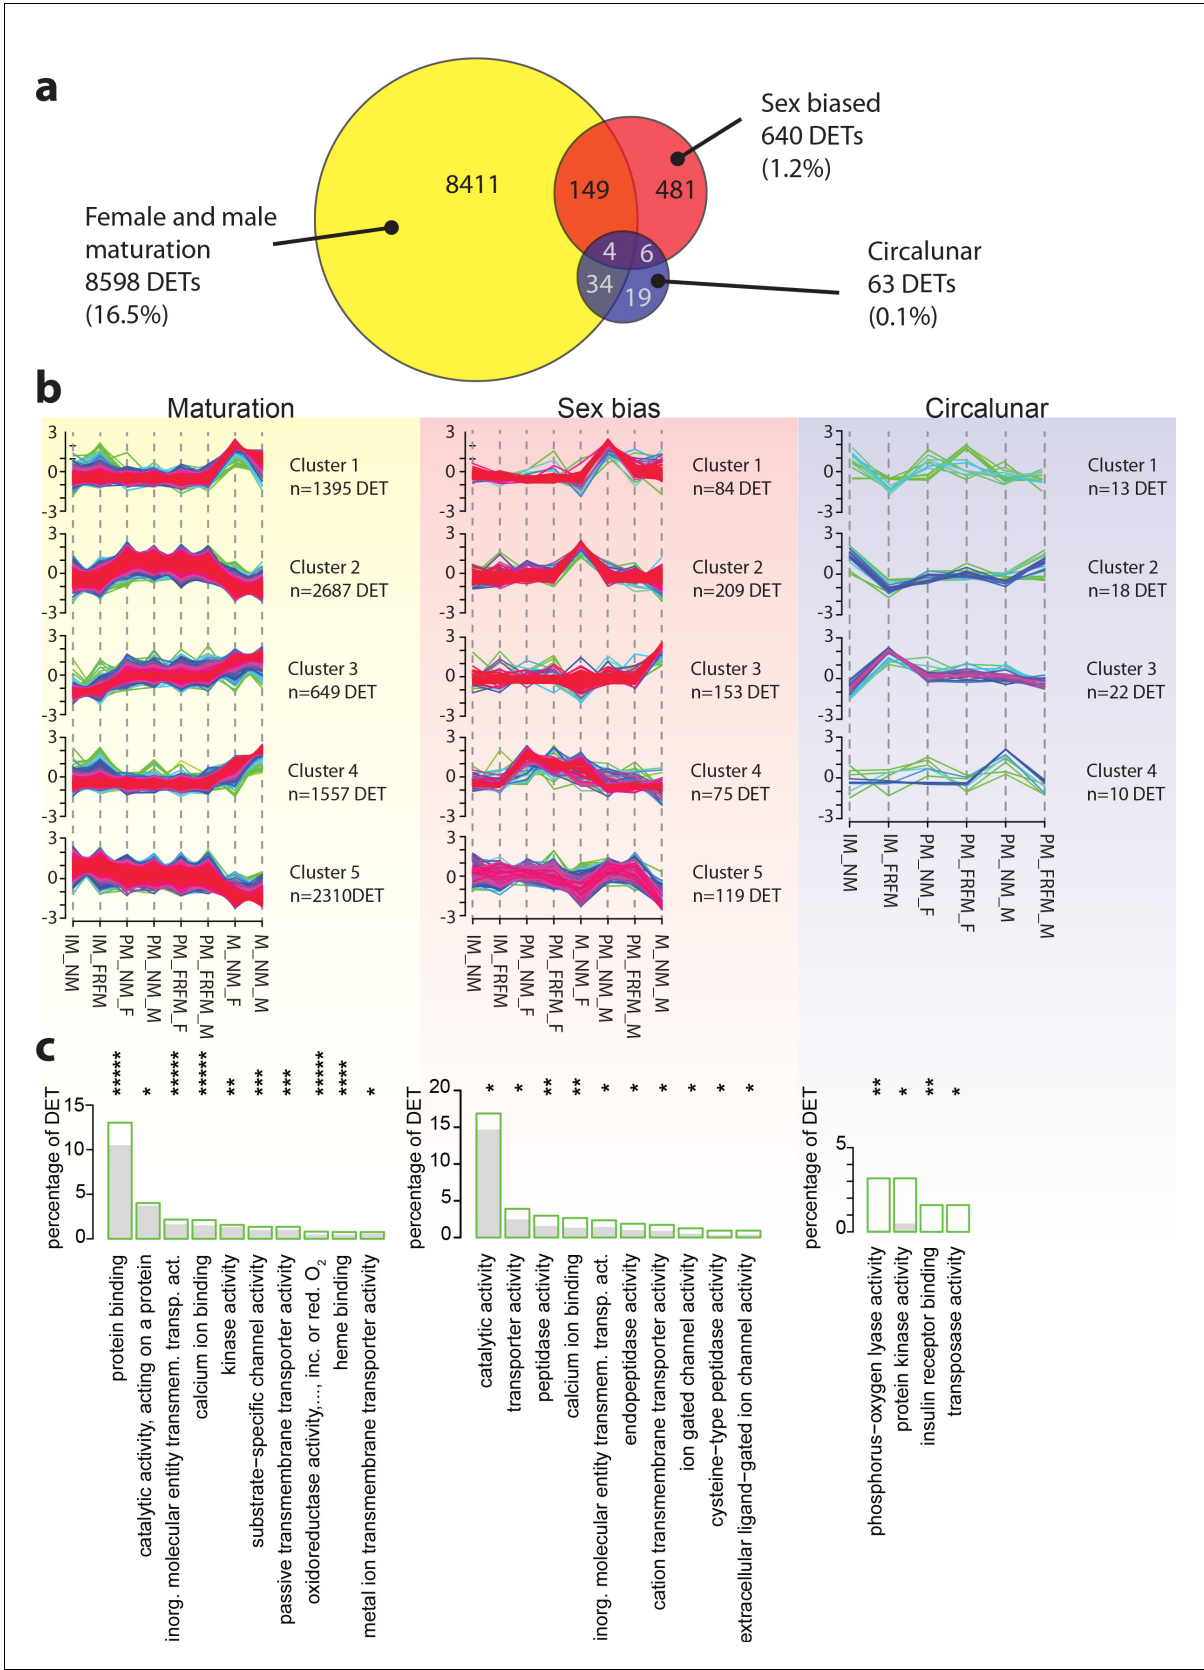

**Figure 3.** Maturation, sex and circalunar phase have distinct transcriptomic signatures in *Platynereis* heads. (a) Venn diagram showing the overall numbers of genes identified as significantly regulated within and across the three different biological processes. Percent in brackets indicate the Figure 3 continued on next page

*Figure 3 continued*

respective fraction compared to total number of analyzed IDs. (b) Soft clustering of differentially expressed genes using the Mfuzz algorithm. Maturation (yellow) and sexual differences (light red) yielded five clusters; circalunar phase-regulated (light blue) expression was best represented by four clusters. Compare to **Figure 5b** for similarity to regulated protein clusters. (c) Results from the GO-term enrichment analysis using the GOSTats package on the differentially expressed genes in each comparison; the ten most abundant terms in the Molecular Function category are displayed (for more GO-results see **Figure 3—figure supplement 1–9**). Green boxes: actual percentage of differentially expressed transcripts for each term; grey bars: expected number of transcripts per category. Maturation: protein binding: GO:0005515, catalytic activity, acting on a protein: GO:0140096, inorganic molecular entity transmembrane transporter activity: GO:0015318, calcium ion binding: GO:0005509, kinase activity: GO:0016301, substrate-specific channel activity: GO:0022838, passive transmembrane transporter activity: GO:0022803, oxidoreductase activity, acting on paired donors, with incorporation or reduction of molecular oxygen: GO:0016705, heme binding: GO:0020037, metal ion transmembrane transporter activity: GO:0046873. Sex bias: catalytic activity: GO:0003824, transporter activity: GO:0005215, peptidase activity: GO:0008233, calcium ion binding: GO:0005509, inorganic molecular entity transmembrane transporter activity: GO:0015318, endopeptidase activity: GO:0004175, cation transmembrane transporter activity: GO:0008324, ion gated channel activity: GO:0022839, cysteine-type peptidase activity: GO:0008234. Circalunar phase: phosphorus-oxygen lyase activity: GO:0016849, protein kinase activity: GO:0004672, insulin receptor binding: GO:0005158, transposase activity: GO:0004803. Statistical significance was tested with a hypergeometric G-test implemented in the GOSTats package. \* $p < 0.05$ , \*\* $p < 0.01$ , \*\*\* $p < 0.001$ , \*\*\*\* $p < 0.0001$ , \*\*\*\*\* $p < 0.00001$ .

DOI: <https://doi.org/10.7554/eLife.41556.013>

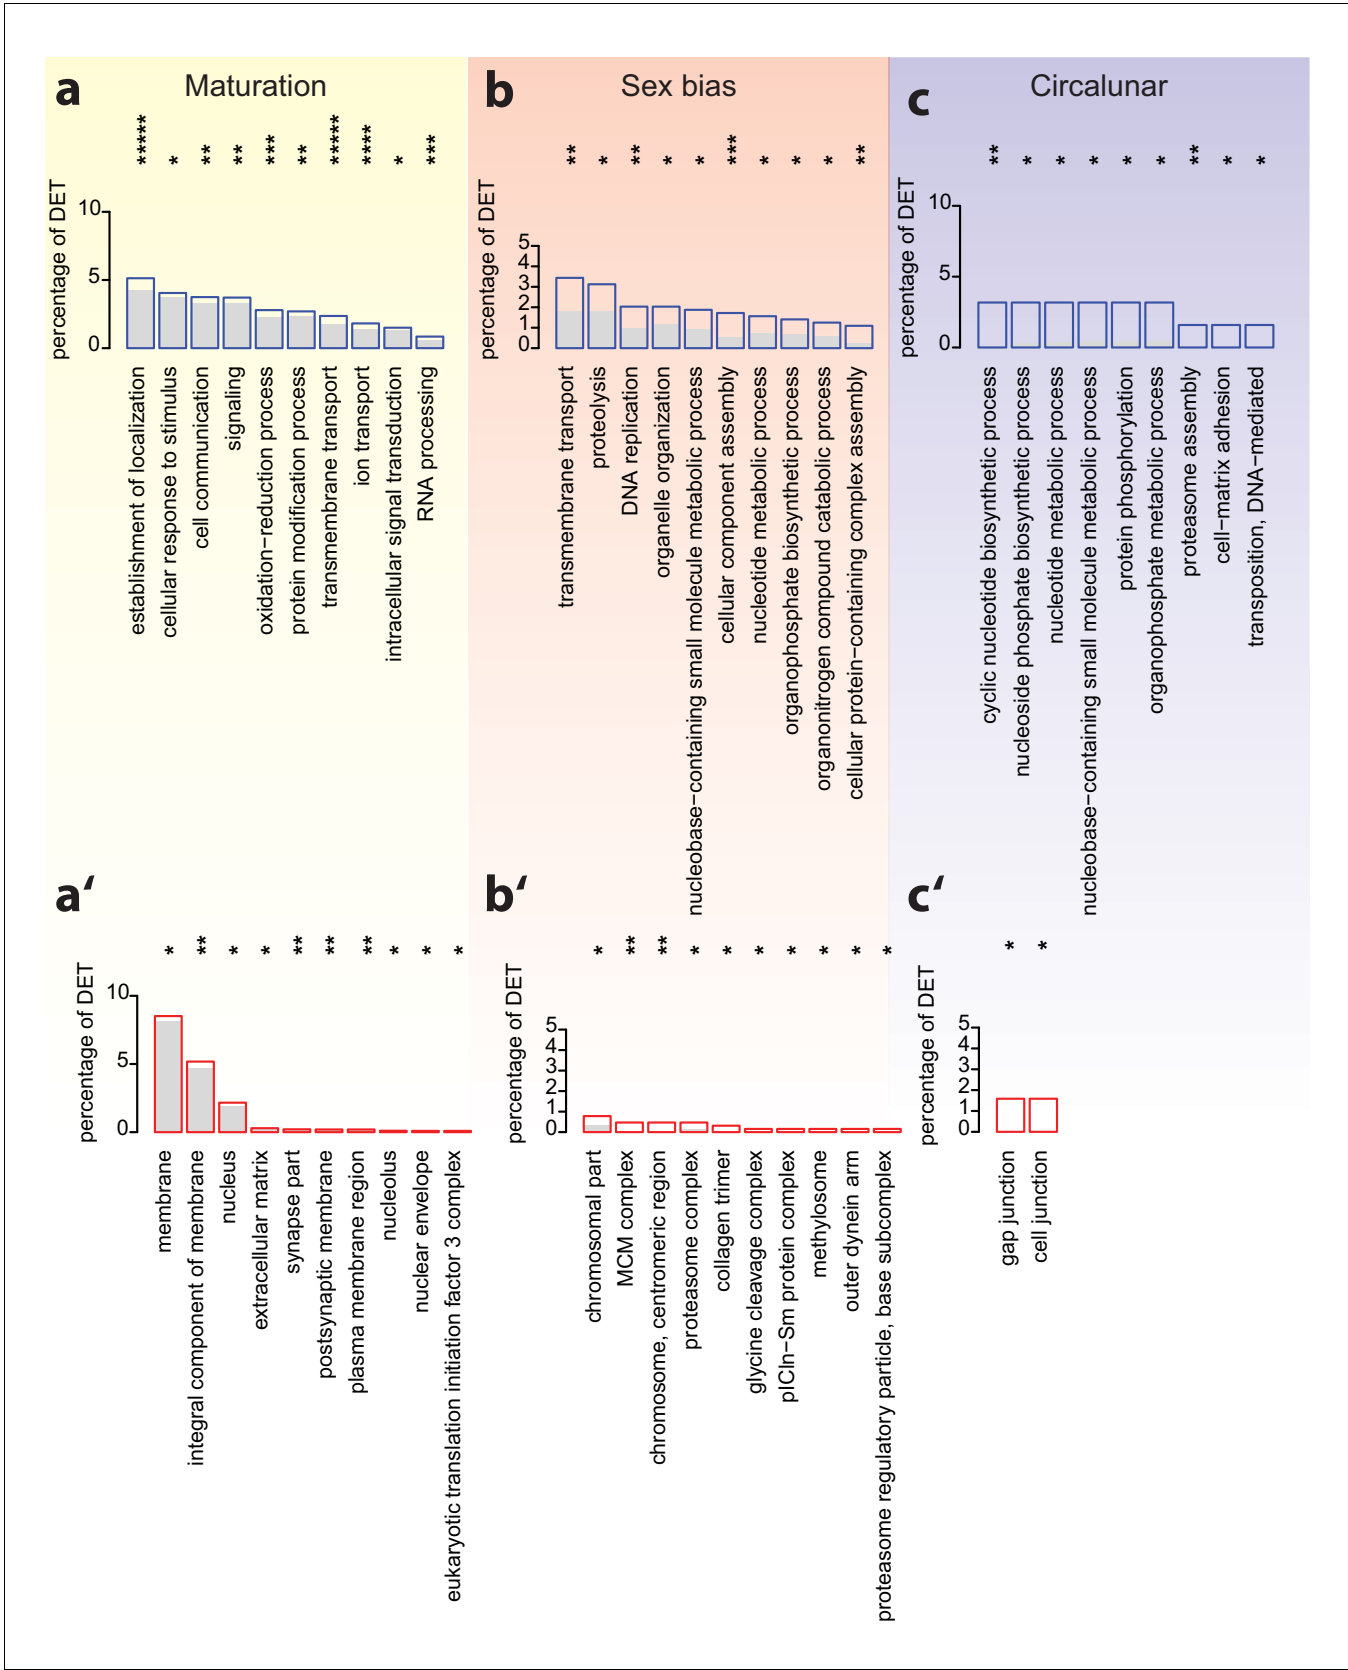

**Figure 3—figure supplement 1.** Analyses of over-represented GO-terms support the existence of distinct molecular signatures for maturation, sex and circalunar clock phase. (a–c) top 10 enriched terms in the Biological Process category; blue boxes: percentage of differentially expressed transcripts for Figure 3—figure supplement 1 continued on next page

Figure 3—figure supplement 1 continued

each term; the grey bars: expected numbers of transcripts per category. Maturation: establishment of localization: GO:0051234, cellular response to stimulus: GO:0051716, cell communication: GO:0007154, signaling: GO:0023052, oxidation-reduction process: GO:0055114, protein modification process: GO:0036211, transmembrane transport: GO:0055085, ion transport: GO:0006811, intracellular signal transduction: GO:0035556, RNA processing: GO:0006396. Sex bias: transmembrane transport: GO:0055085, proteolysis: GO:0006508, DNA replication: GO:0006260, organelle organization: GO:0006996, nucleobase-containing small molecule metabolic process: GO:0055086, cellular component assembly: GO:0022607, nucleotide metabolic process: GO:0009117, organophosphate biosynthetic process: GO:0090407, organonitrogen compound catabolic process: GO:1901565, cellular protein-containing complex assembly: GO:0034622. Circalunar phase: cyclic nucleotide biosynthetic process: GO:0009190, nucleoside phosphate biosynthetic process: GO:1901293, nucleotide metabolic process, GO:0009117, nucleobase-containing small molecule metabolic process, GO:0055086, protein phosphorylation, GO:0006468, organophosphate metabolic process, GO:0019637, proteasome assembly, GO:0043248, cell-matrix adhesion, GO:0007160, transposition, DNA-mediated: GO:0006313. (a'–c') In analogy to (a–c), these panels list the top 10 enriched terms in the Cellular Compartment category. Red boxes: percentage of differentially expressed transcripts for each term; the grey bars: expected values of transcripts per category. Maturation: membrane: GO:0016020, integral component of membrane: GO:0016021, nucleus: GO:0005634, extracellular matrix: GO:0031012, synapse part: GO:0044456, postsynaptic membrane: GO:0045211, plasma membrane region: GO:0098590, nucleolus: GO:0005730, nuclear envelope: GO:0005635, eukaryotic translation initiation factor three complex: GO:0005852. Sex bias: chromosomal part: GO:0044427, MCM complex: GO:0042555, chromosome, centromeric region: GO:0000775, proteasome complex: GO:0000502, collagen trimer: GO:0005581, glycine cleavage complex: GO:0005960, pICln-Sm protein complex: GO:0034715, methylosome: GO:0034709, outer dynein arm: GO:0036157, proteasome regulatory particle, base subcomplex: GO:0008540. Circalunar phase: gap junction: GO:0005921, cell junction: GO:0030054. For all analyses, statistical significance was tested with a hypergeometric test implemented in the GOSStats package. \* $p < 0.05$ , \*\* $p < 0.01$ , \*\*\* $p < 0.001$ , \*\*\*\* $p < 0.0001$ , \*\*\*\*\* $p < 0.00001$ .

DOI: <https://doi.org/10.7554/eLife.41556.014>

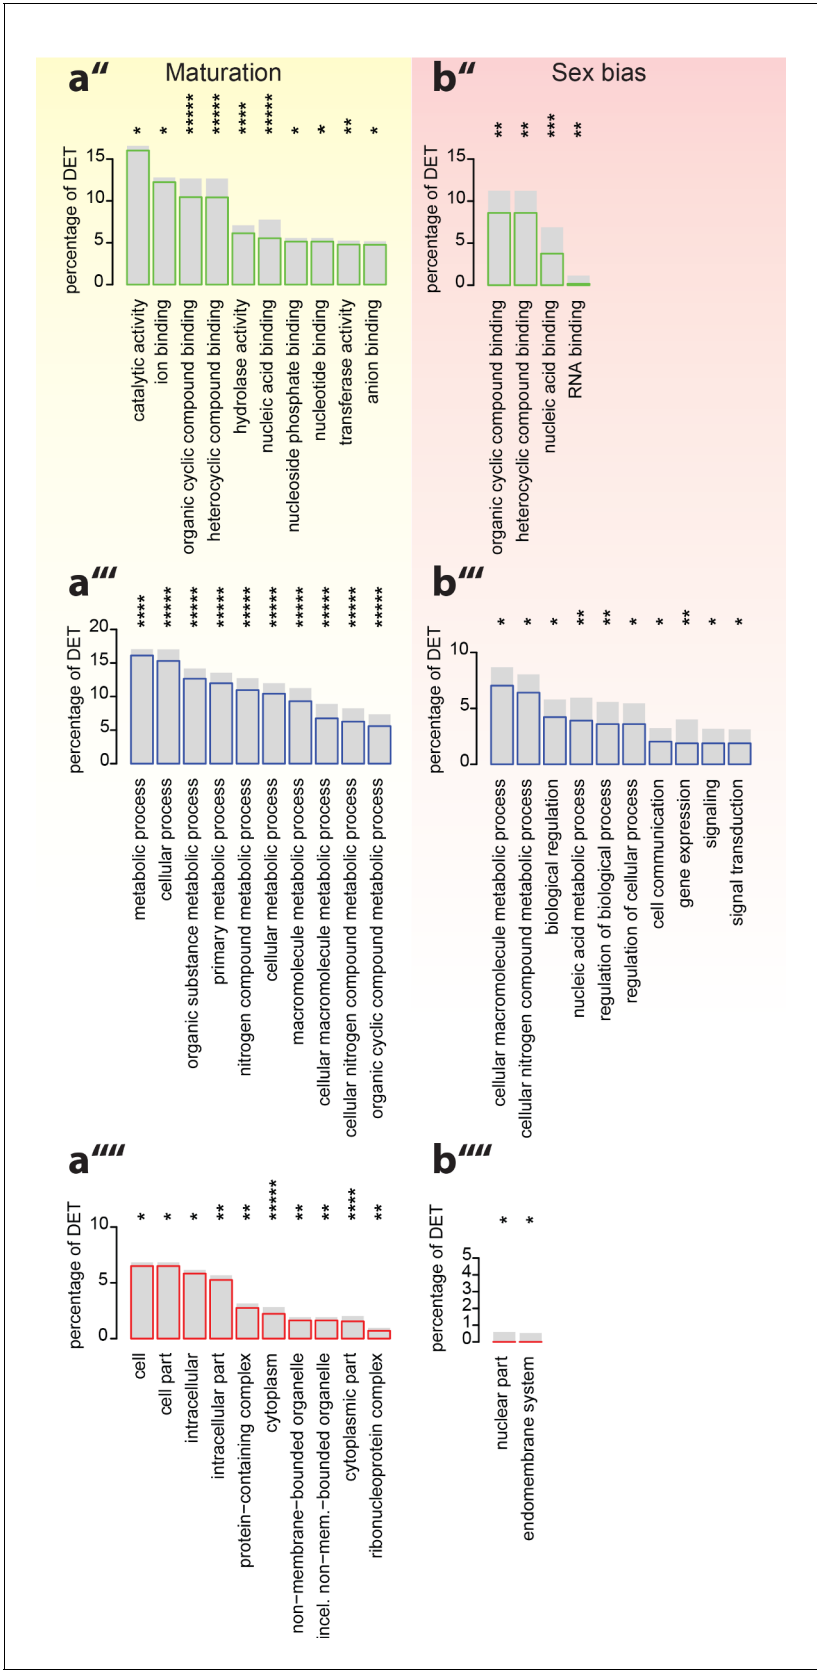

**Figure 3—figure supplement 2.** Analyses of under-represented GO-terms support the existence of distinct molecular signatures for maturation, sex and circalunar clock phase. (a''–b''') corresponding analyses focusing on top under-represented GO-terms; (a'',b'') top under-represented GO-terms in Figure 3—figure supplement 2 continued on next page



Figure 3—figure supplement 2 continued

the Molecular Function category; Maturation: catalytic activity: GO:0003824, ion binding: GO:0043167, organic cyclic compound binding: GO:0097159, heterocyclic compound binding, GO:1901363, hydrolase activity, GO:0016787, nucleic acid binding, GO:0003676, nucleoside phosphate binding, GO:1901265, nucleotide binding, GO:0000166, transferase activity, GO:0016740, anion binding, GO:0043168. Sex bias: organic cyclic compound binding: GO:0097159, heterocyclic compound binding: GO:1901363, nucleic acid binding: GO:0003676, RNA binding: GO:0003723. Circalunar phase: no significantly under-represented GO-terms at  $\alpha \leq 0.05$ . (a''',b''') Top underrepresented terms in the Biological Process category. Maturation: metabolic process: GO:0008152, cellular process: GO:0009987, organic substance metabolic process: GO:0071704, primary metabolic process: GO:0044238, nitrogen compound metabolic process: GO:0006807, cellular metabolic process: GO:0044237, macromolecule metabolic process: GO:0043170, cellular macromolecule metabolic process: GO:0044260, cellular nitrogen compound metabolic process: GO:0034641, organic cyclic compound metabolic process: GO:1901360. Sex bias: cellular macromolecule metabolic process: GO:0044260, cellular nitrogen compound metabolic process: GO:0034641, biological regulation: GO:0065007, nucleic acid metabolic process: GO:0090304, regulation of biological process: GO:0050789, regulation of cellular process: GO:0050794, cell communication: GO:0007154, gene expression: GO:0010467, signaling: GO:0023052, signal transduction: GO:0007165. Circalunar phase: no significantly underrepresented GO-terms at  $\alpha \leq 0.05$ . (a''',b''') Top under-represented terms in the Cellular Compartment category. Maturation: cell: GO:0005623, cell part: GO:0044464, intracellular: GO:0005622, intracellular part: GO:0044424, protein-containing complex: GO:0032991, cytoplasm: GO:0005737, non-membrane-bounded organelle: GO:0043228, intracellular non-membrane-bounded organelle (incl. non-mem.-bounded organelle): GO:0043232, cytoplasmic part: GO:0044444, ribonucleoprotein complex: GO:1990904. Sex bias: nuclear part: GO:0044428, endomembrane system: GO:0012505. Circalunar phase: no significantly underrepresented GO-terms at  $\alpha \leq 0.05$ . For all analyses, statistical significance was tested with a hypergeometric test implemented in the GOSTats package. \* $p < 0.05$ , \*\* $p < 0.01$ , \*\*\* $p < 0.001$ , \*\*\*\* $p < 0.0001$ , \*\*\*\*\* $p < 0.00001$ .

DOI: <https://doi.org/10.7554/eLife.41556.015>

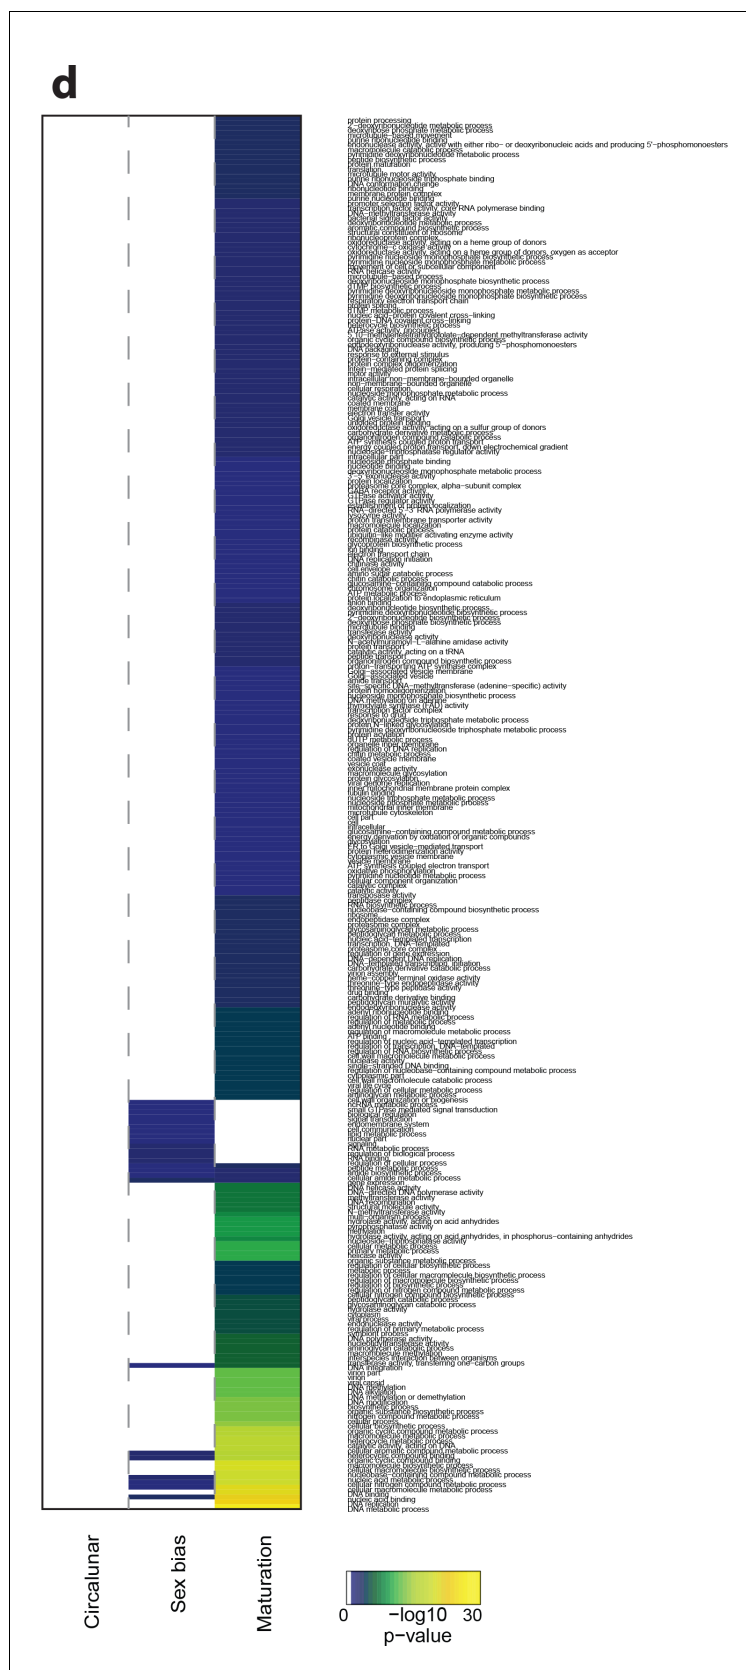

**Figure 3—figure supplement 3.** Heat map displaying under-represented GO-terms in all categories. The heat map is subdivided (columns) by the regulation of each GO-term by circalunar clock phase (left), sex (middle) and/

*Figure 3—figure supplement 3 continued on next page*

*Figure 3—figure supplement 3 continued*

or maturation (right); colours are indicative of the enrichment p-value as calculated by a hypergeometric test implemented in the GOSStats package.

DOI: <https://doi.org/10.7554/eLife.41556.016>

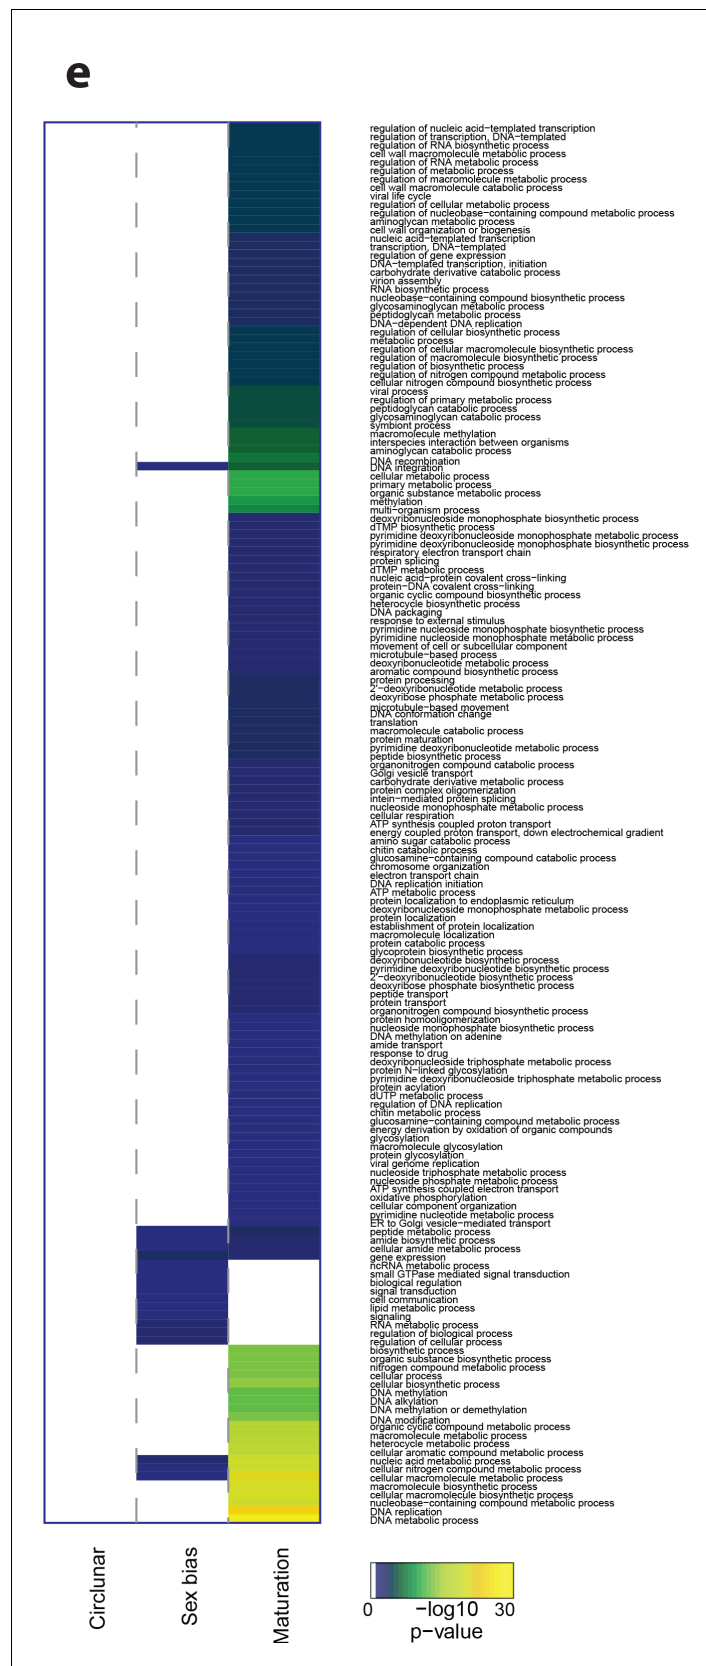

**Figure 3—figure supplement 4.** Heat map displaying under-represented GO-terms in the Biological Process category. The heat map is subdivided (columns) by the regulation of each GO-term by circalunar clock phase (left), *Figure 3—figure supplement 4 continued on next page*

*Figure 3—figure supplement 4 continued*

sex (middle) and/or maturation (right); colours are indicative of the enrichment p-value as calculated by a hypergeometric test implemented in the GOSets package.

DOI: <https://doi.org/10.7554/eLife.41556.017>

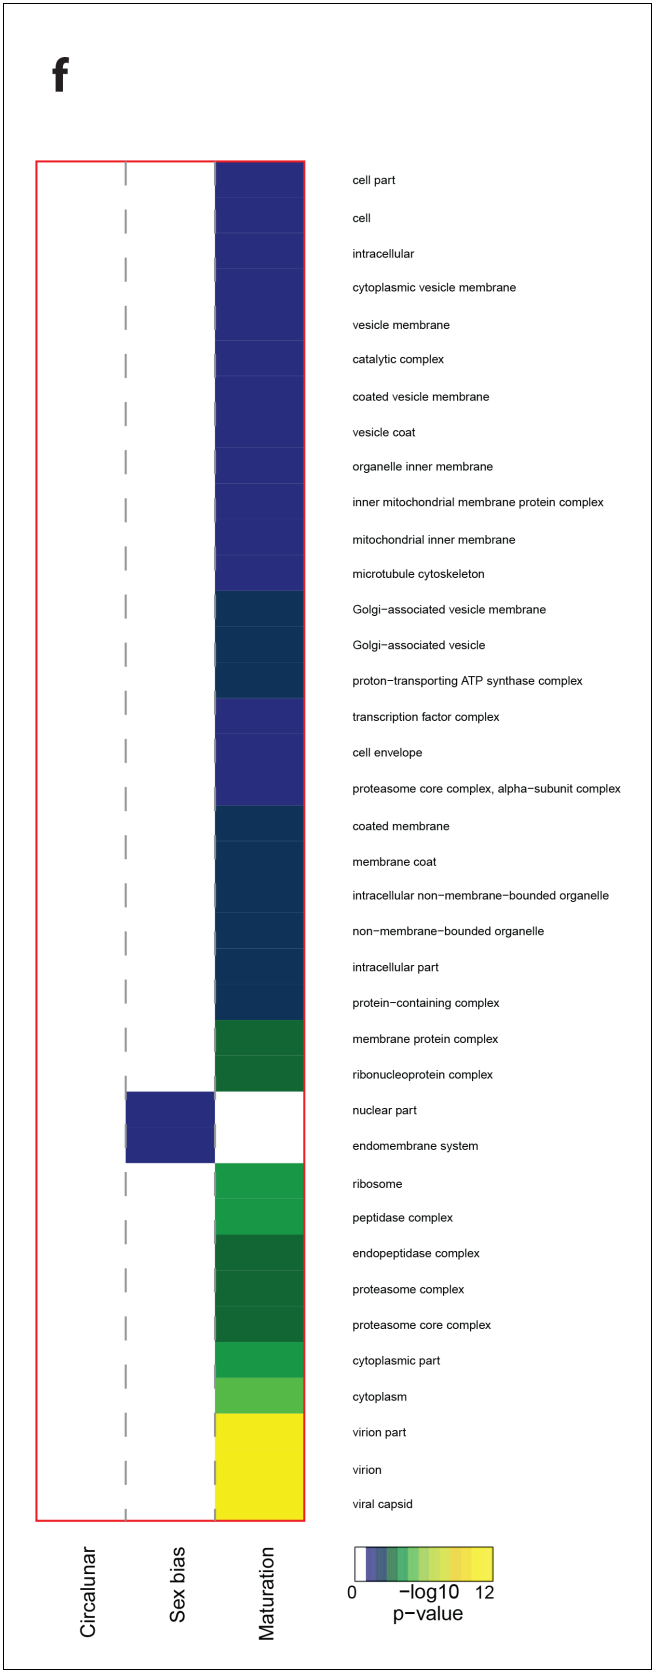

**Figure 3—figure supplement 5.** Heat map displaying under-represented GO-terms in the Cellular Compartment category. The heat map is subdivided (columns) by the regulation of each GO-term by circalunar  
*Figure 3—figure supplement 5 continued on next page*

*Figure 3—figure supplement 5 continued*

clock phase (left), sex (middle) and/or maturation (right); colours are indicative of the enrichment p-value as calculated by a hypergeometric test implemented in the GOSStats package.

DOI: <https://doi.org/10.7554/eLife.41556.018>

g

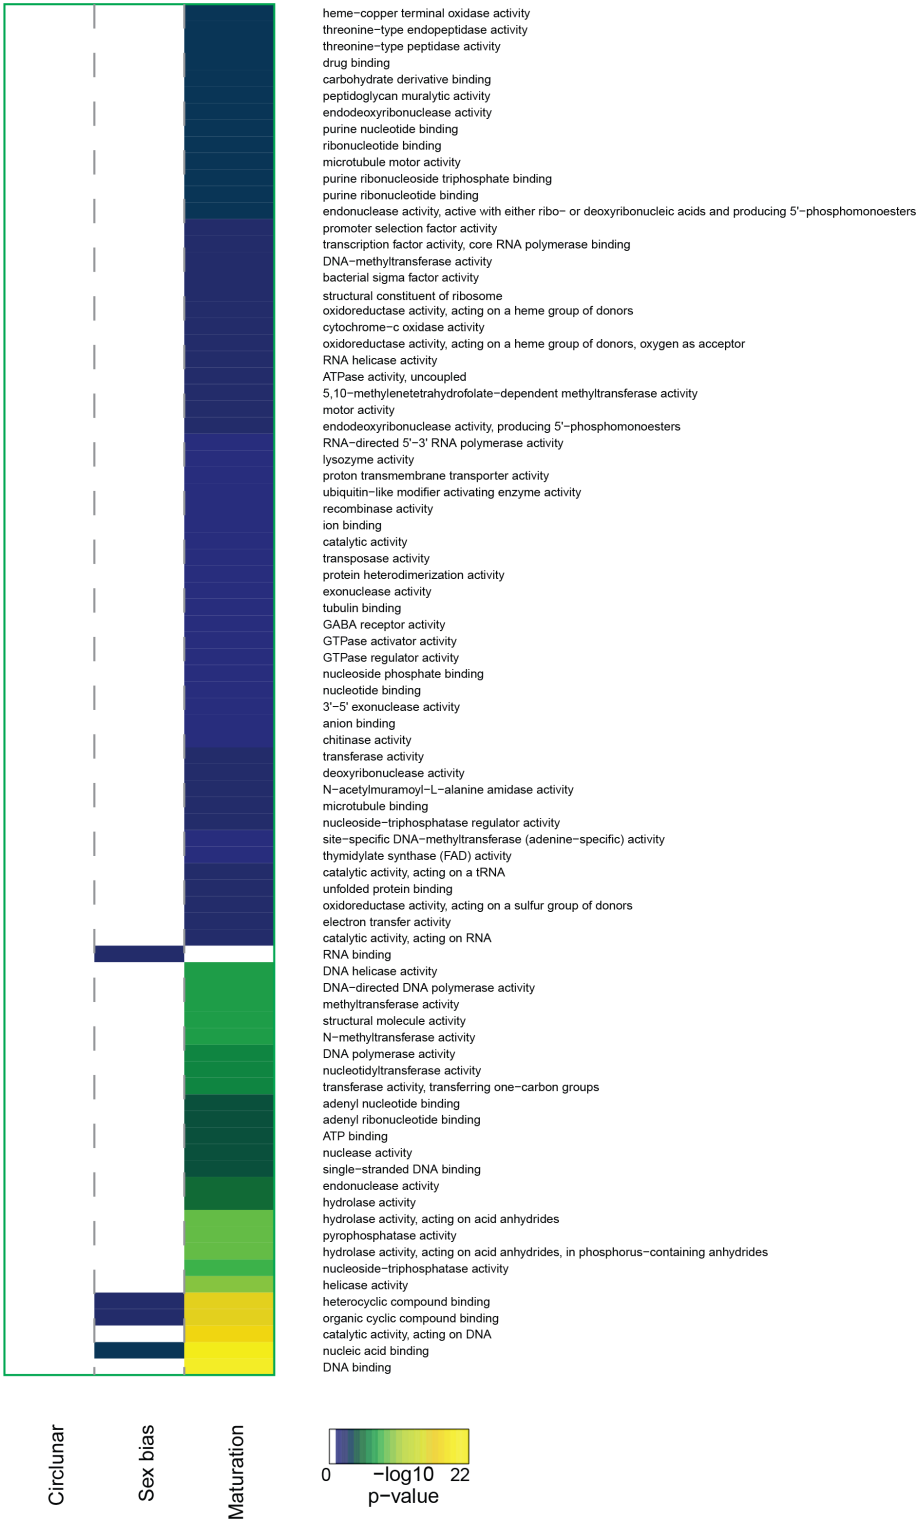



**Figure 3—figure supplement 6.** Heat map displaying under-represented GO-terms in the Molecular Function category. The heat map is subdivided (columns) by the regulation of each GO-term by circalunar clock phase (left), sex (middle) and/or maturation (right); colours are indicative of the enrichment p-value as calculated by a hypergeometric test implemented in the GOSTats package.

DOI: <https://doi.org/10.7554/eLife.41556.019>

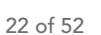

**Figure 3—figure supplement 7.** Heat map displaying over-represented GO-terms in all categories. The heat map is subdivided (columns) by the regulation of each GO-term by circalunar clock phase (left), sex (middle) and/or maturation (right); colours are indicative of the enrichment p-value as calculated by a hypergeometric test implemented in the GOSTats package.

DOI: <https://doi.org/10.7554/eLife.41556.020>

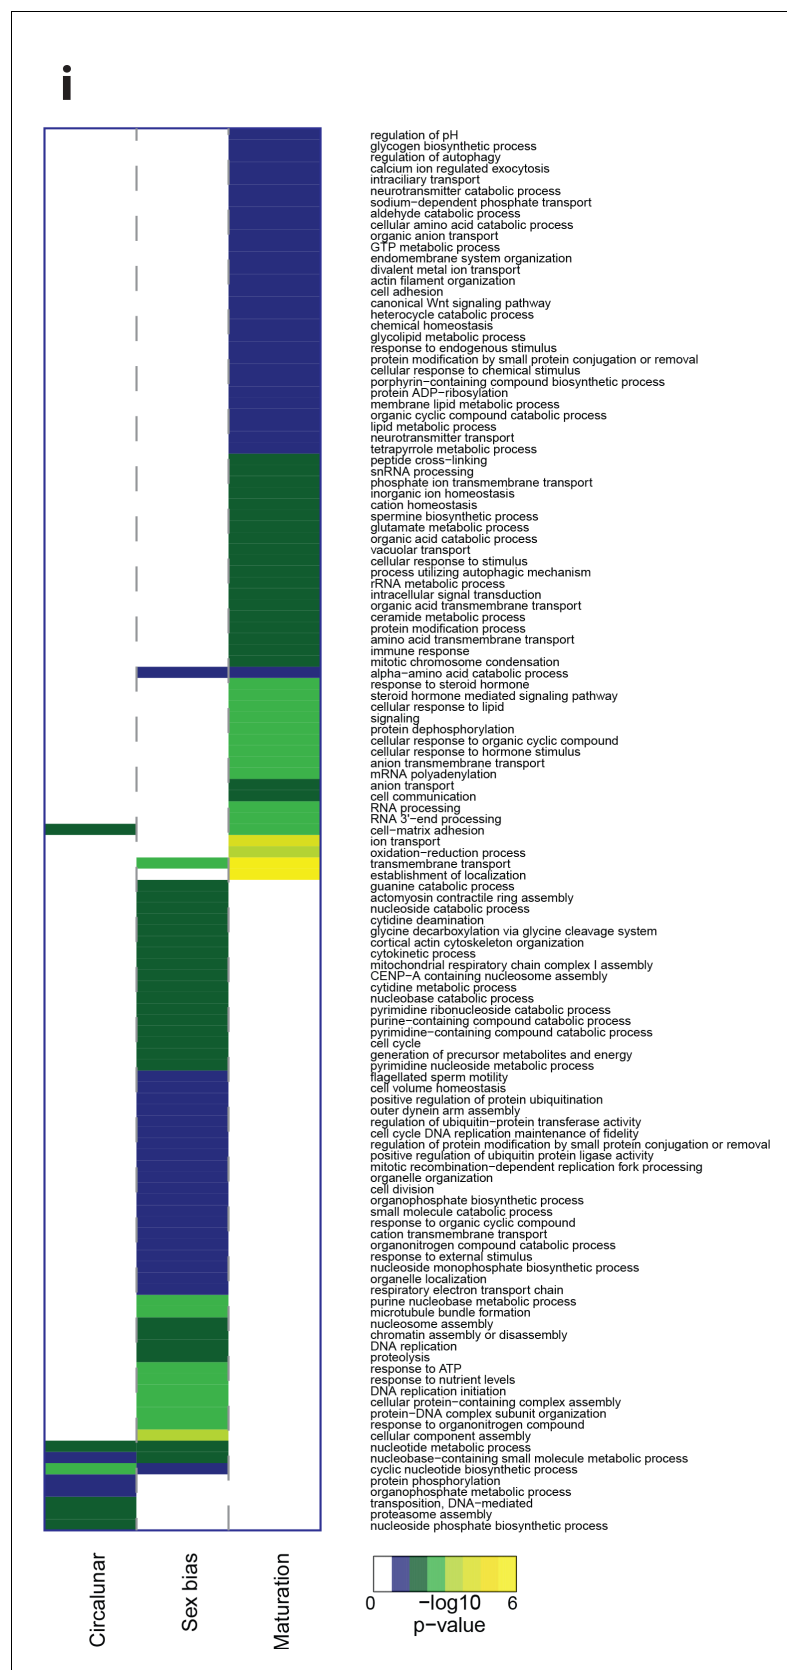

**Figure 3—figure supplement 8.** Heat map displaying over-represented GO-terms in the Biological Process category. The heat map is subdivided (columns) by the regulation of each GO-term by circalunar clock phase  
*Figure 3—figure supplement 8 continued on next page*

*Figure 3—figure supplement 8 continued*

(left), sex (middle) and/or maturation (right); colours are indicative of the enrichment p-value as calculated by a hypergeometric test implemented in the GOSets package.

DOI: <https://doi.org/10.7554/eLife.41556.021>

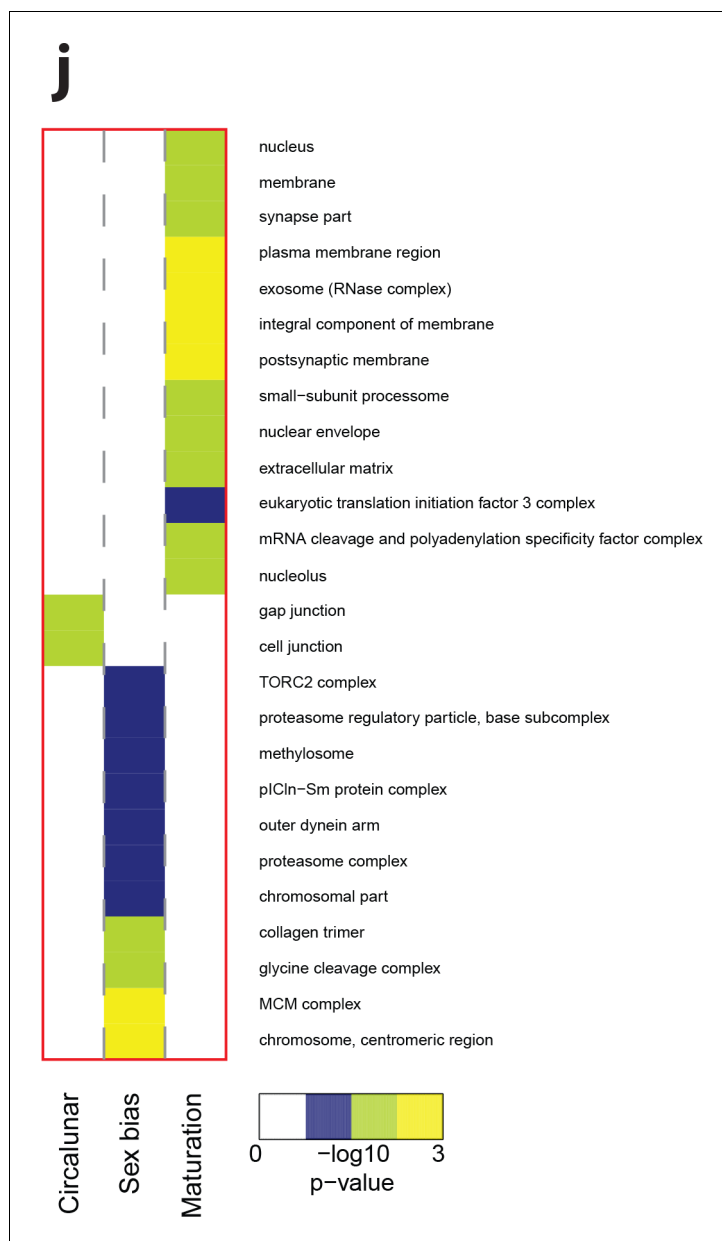

**Figure 3—figure supplement 9.** Heat map displaying over-represented GO-terms in the Cellular Compartment category. The heat map is subdivided (columns) by the regulation of each GO-term by circalunar clock phase (left), sex (middle) and/or maturation (right); colours are indicative of the enrichment p-value as calculated by a hypergeometric test implemented in the GOSTats package.

DOI: <https://doi.org/10.7554/eLife.41556.022>

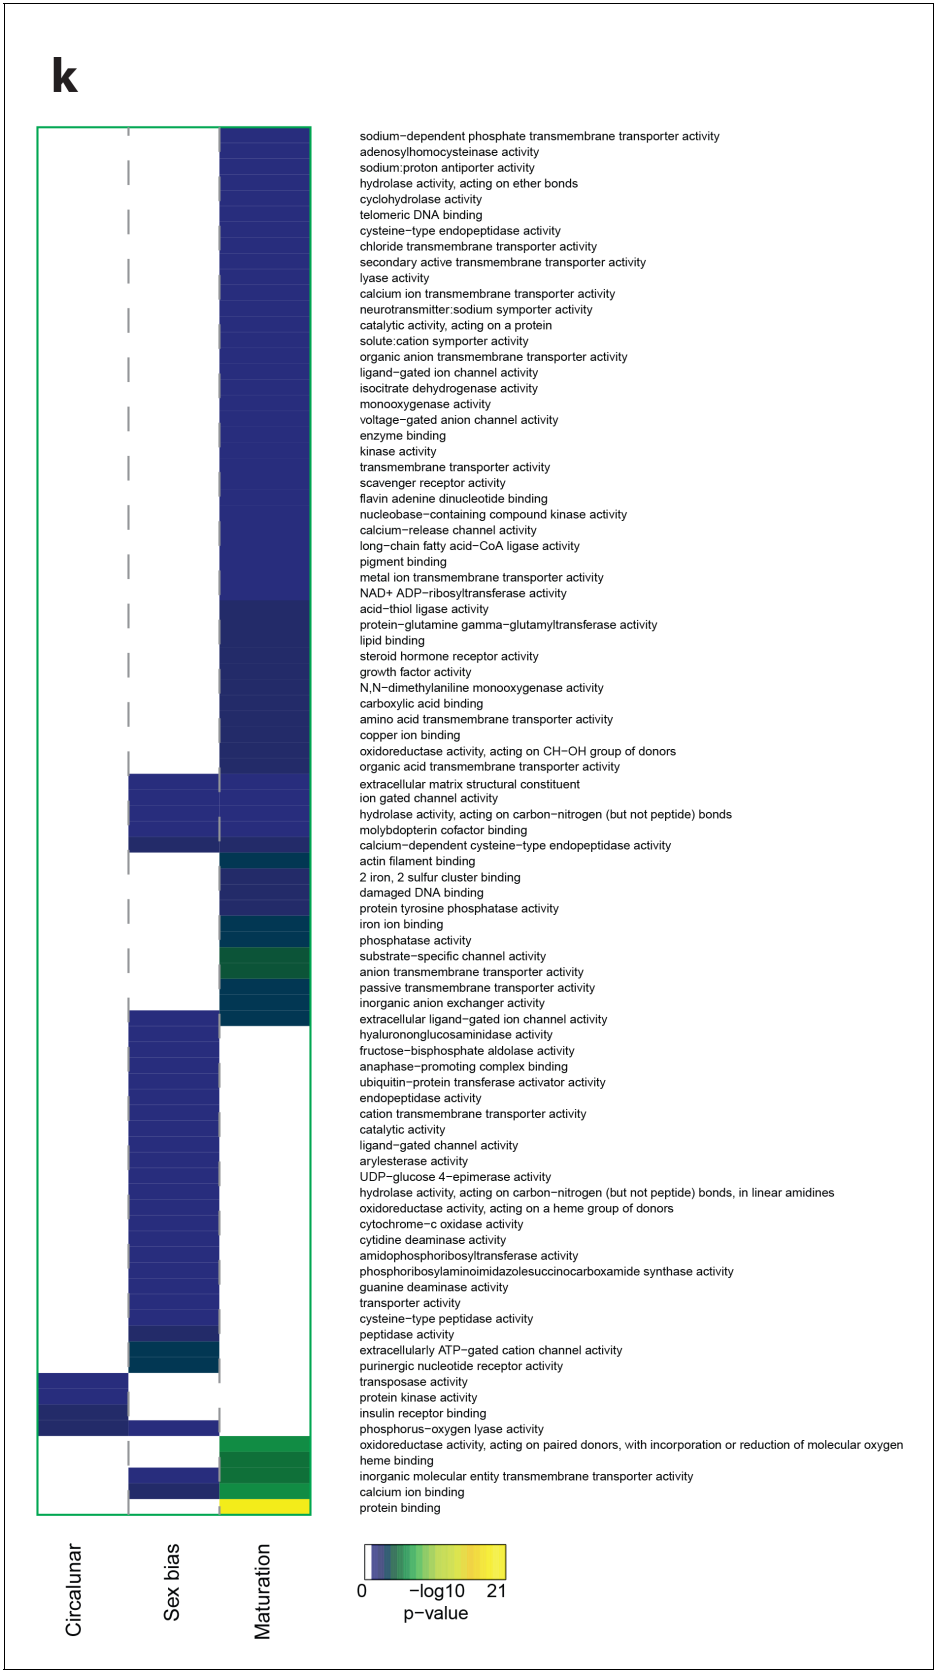

**Figure 3—figure supplement 10.** Heat map displaying over-represented GO-terms in the Molecular Function category. The heat map is subdivided (columns) by the regulation of each GO-term by circalunar clock phase (left), sex (middle) and/or maturation (right); colours are indicative of the enrichment p-value as calculated by a hypergeometric test implemented in the GOSTats package.

DOI: <https://doi.org/10.7554/eLife.41556.023>



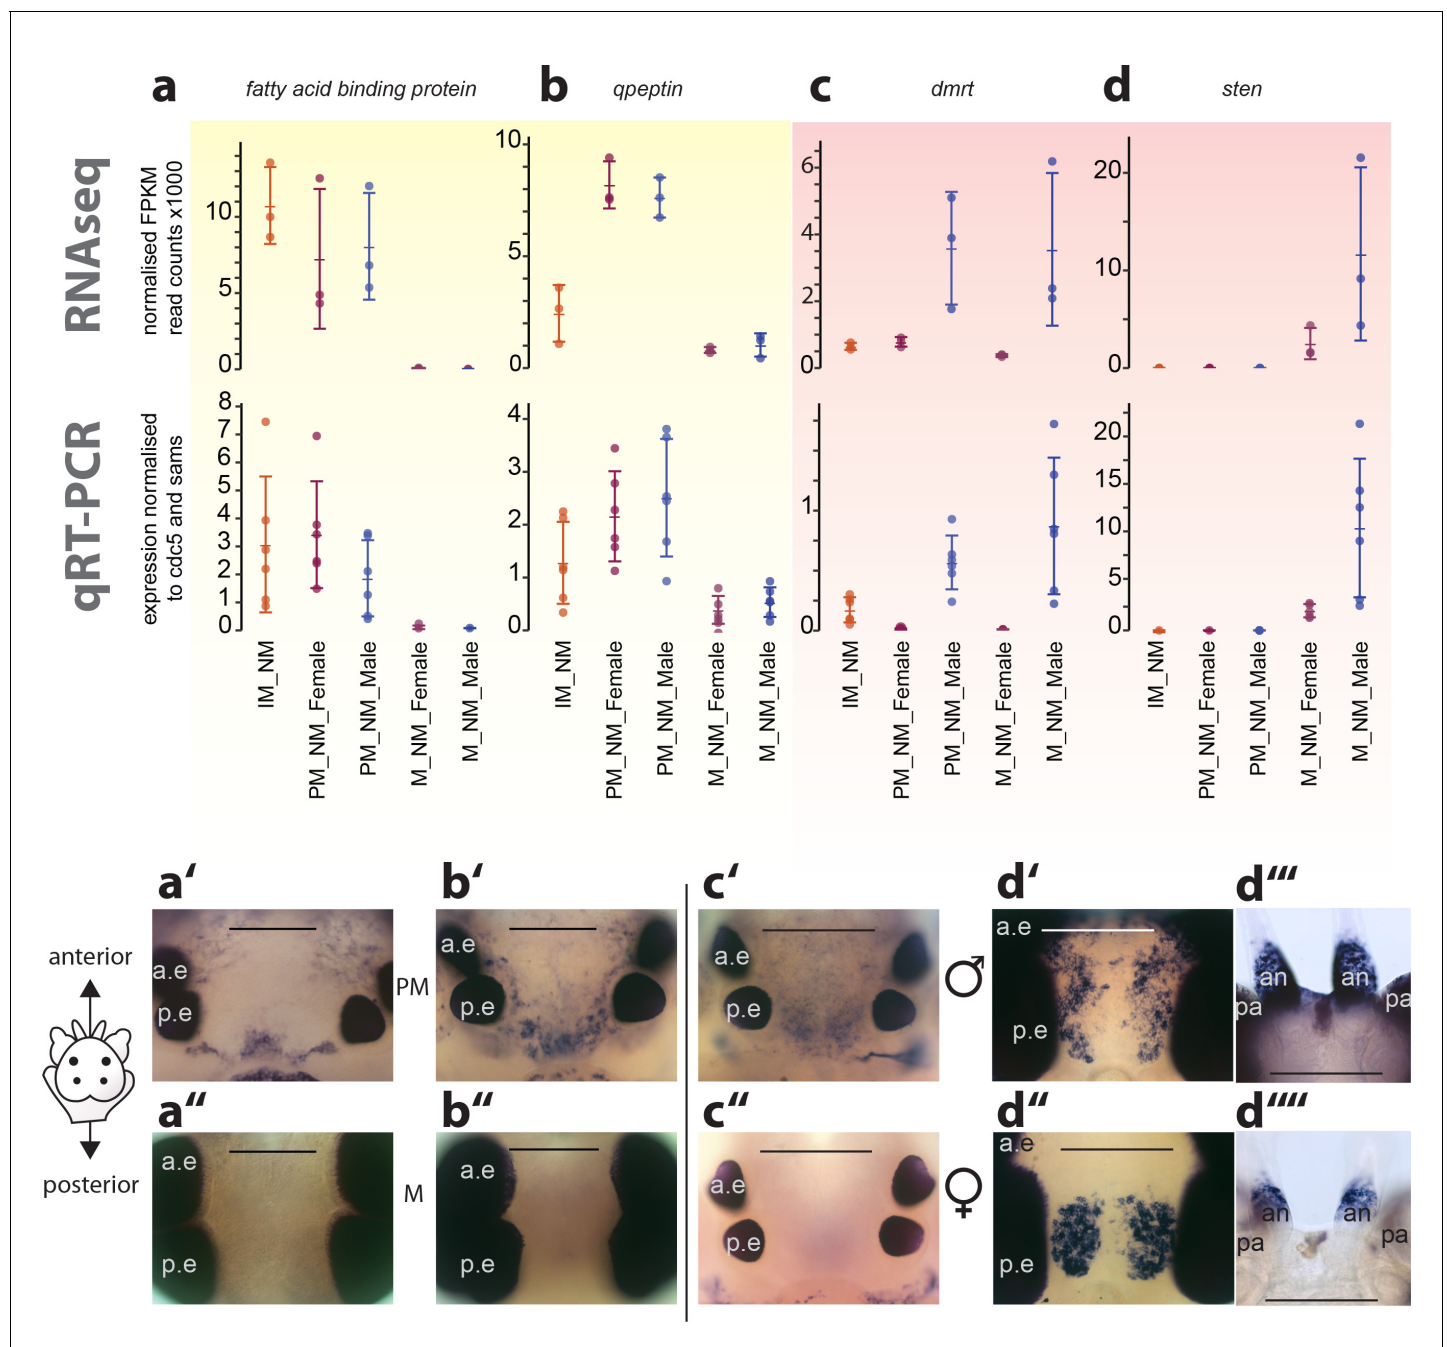

**Figure 4.** Exemplary validation of candidate genes by qRT-PCR and expression domains in the head. (a–a'', b–b'') Maturation markers *fatty acid binding protein* and *qpeptin*. (c–c'', d–d'') Sexual differentiation markers *dmrt* and *sten*. (a–d): qRT-PCR validation of the candidates relative to the arithmetic mean of the reference genes *cdc5* and *sams*. All graphs show the arithmetic mean with standard deviation, and the individual data points. (a'–d'') Whole mount in situ hybridisations of the respective genes, comparing premature animals (PM, (a', b')) with mature animals (M, (a'', b'')), and males (c', d''') with females (c'', d'', d'''), respectively. All images except d''' and d''': dorsal views, anterior to the top, scale bar: 250  $\mu$ m. d''' and d''': ventral views, anterior top, scale bar: 200  $\mu$ m. Also see **Figure 4—figure supplement 1** for further validations. a.e.: anterior eye; p.e.: posterior eye, an: antenna, pa: palpa.

DOI: <https://doi.org/10.7554/eLife.41556.039>

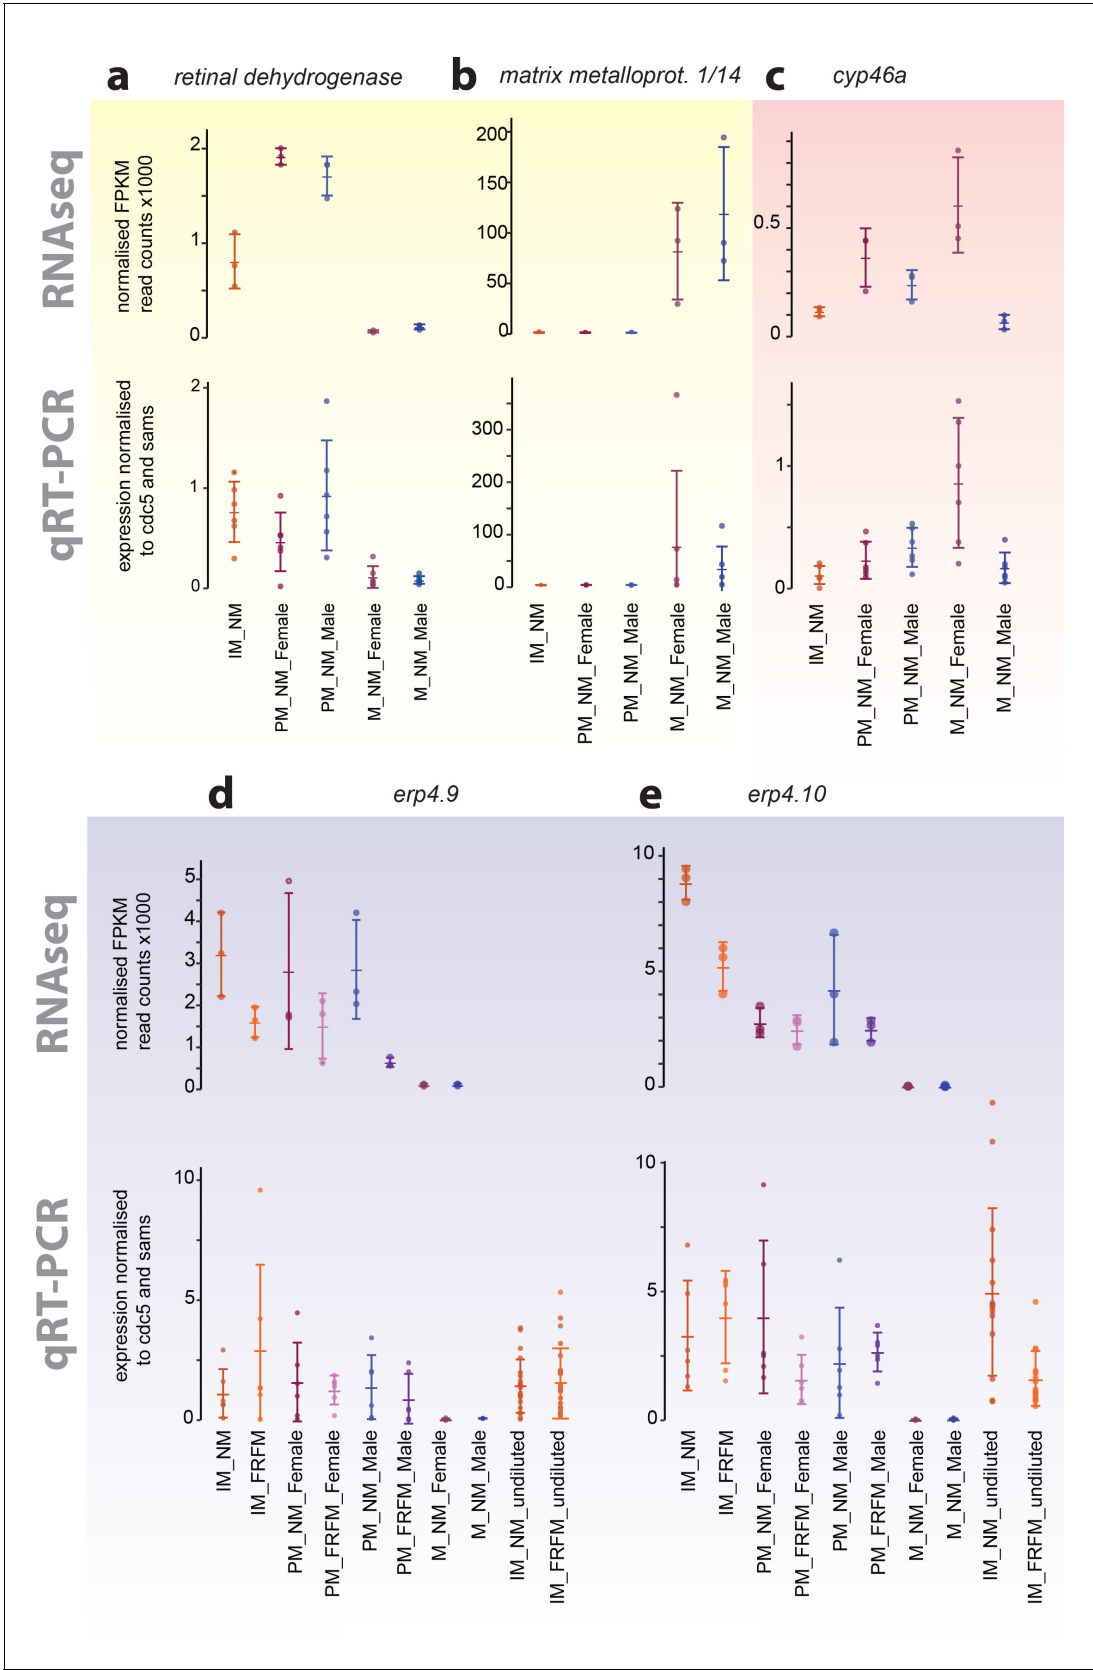

**Figure 4—figure supplement 1.** Exemplary validation of additional transcripts differentially expressed during maturation, between sexes or between circalunar clock phases: (a,b) yellow- identified as maturation regulated; (c) light red- identified as sex-biased regulated; (d,e) light blue- identified as circalunar clock phase regulated. *Figure 4—figure supplement 1 continued on next page*

*Figure 4—figure supplement 1 continued*

circalunar phase regulated. Note that for circalunar phase regulated transcripts verification by qPCR needs a higher cDNA amount input than for the tested maturation and sex-specific regulated transcripts. The graphs show the arithmetic mean with standard deviation, together with individual data points. Further details see **Figure 4** (legend) and Materials and methods.

DOI: <https://doi.org/10.7554/eLife.41556.040>

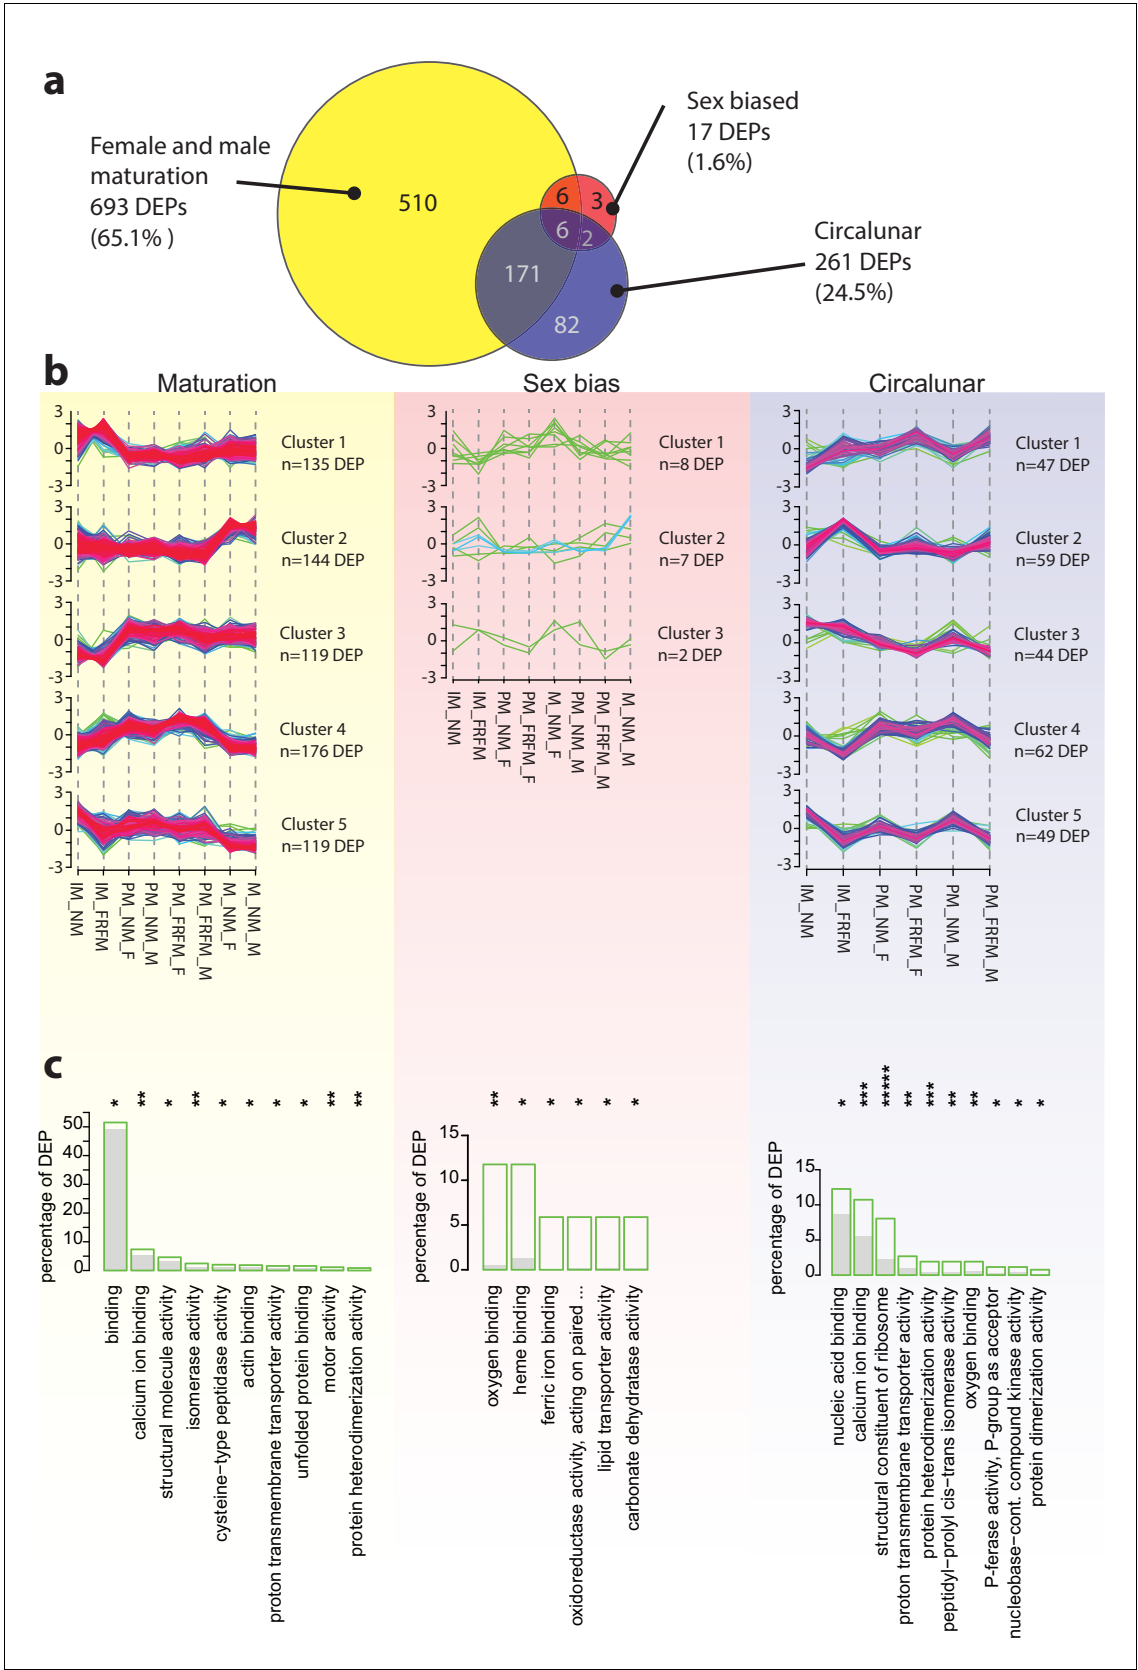

**Figure 5.** The *Platynereis* head proteome is differentially affected by maturation, sex and circalunar phase. (a) Venn diagram showing the proteins significantly regulated within and across the three different biological processes in the three major comparisons made (brackets indicate respective Figure 5 continued on next page

## Figure 5 continued

fraction of total comparable proteins) (b) Soft clustering of differentially expressed proteins using the Mfuzz algorithm. The expression data for maturation and circalunar phase are best represented by five and for sexually dimorphic protein expression by three clusters. Compare to **Figure 3b** for similar dynamics in the regulated transcript clusters. (c) GO-term enrichment analysis using the GOSTats package on the differentially expressed proteins in each comparison showing the ten most abundant terms in the Molecular Function category (further GO-term analyses: see **Figure 5—figure supplement 2–6**). Green boxes show the percentage of differentially expressed proteins for each term; the grey bars depict the expected amount of proteins per category. Maturation: binding: GO:0005488, calcium ion binding: GO:0005509, structural molecule activity: GO:0005198, isomerase activity: GO:0016853, cysteine-type peptidase activity: GO:0008234, actin binding: GO:0003779, proton transmembrane transporter activity: GO:0015078, unfolded protein binding: GO:0051082, motor activity: GO:0003774, protein heterodimerization activity: GO:0046982. Sex bias: oxygen binding: GO:0019825, heme binding: GO:0020037, ferric iron binding: GO:0008199, oxidoreductase activity, acting on paired donors, with incorporation or reduction of molecular oxygen, reduced pteridine as one donor, and incorporation of one atom of oxygen (oxidoreductase activity, acting on paired...): GO:0016714, lipid transporter activity: GO:0005319, carbonate dehydratase activity: GO:0004089. Circalunar phase: nucleic acid binding: GO:0003676, calcium ion binding: GO:0005509, structural constituent of ribosome: GO:0003735, proton transmembrane transporter activity: GO:0015078, protein heterodimerization activity: GO:0046982, peptidyl-prolyl cis-trans isomerase activity: GO:0003755, oxygen binding: GO:0019825, phosphotransferase activity, phosphate group as acceptor: GO:0016776, nucleobase-containing compound kinase activity: GO:0019205, protein dimerization activity: GO:0046983. Statistical significance was tested with a hypergeometric test implemented in the GOSTats package. \* $p < 0.05$ , \*\* $p < 0.01$ , \*\*\* $p < 0.001$ , \*\*\*\* $p < 0.0001$ , \*\*\*\*\* $p < 0.00001$ .

DOI: <https://doi.org/10.7554/eLife.41556.042>

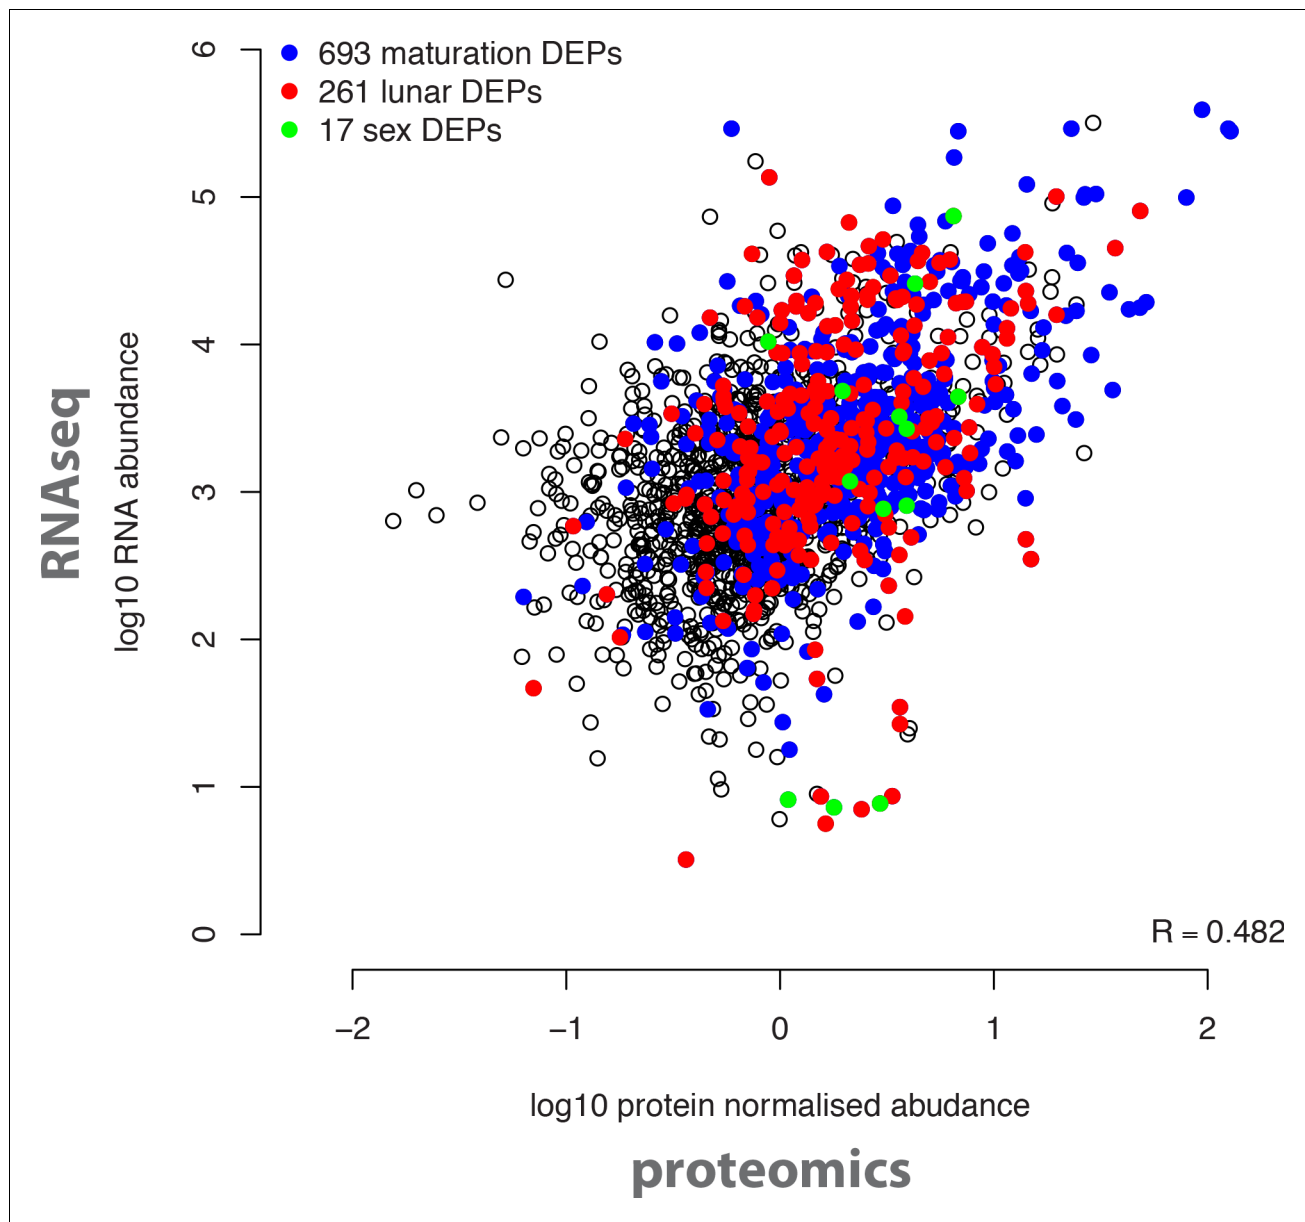

**Figure 5—figure supplement 1.** Overall correlation of protein and transcript abundances detected in the same biological samples. The log10 transformed normalised mean protein abundances of all 2,290 detected proteins (x axis) were correlated with the log10 transformed DESeq-normalised RNA transcript abundances (y axis). Coloured dots correspond to proteins significantly regulated in the indicated analyses (maturation, sex, circalunar).

DOI: <https://doi.org/10.7554/eLife.41556.043>

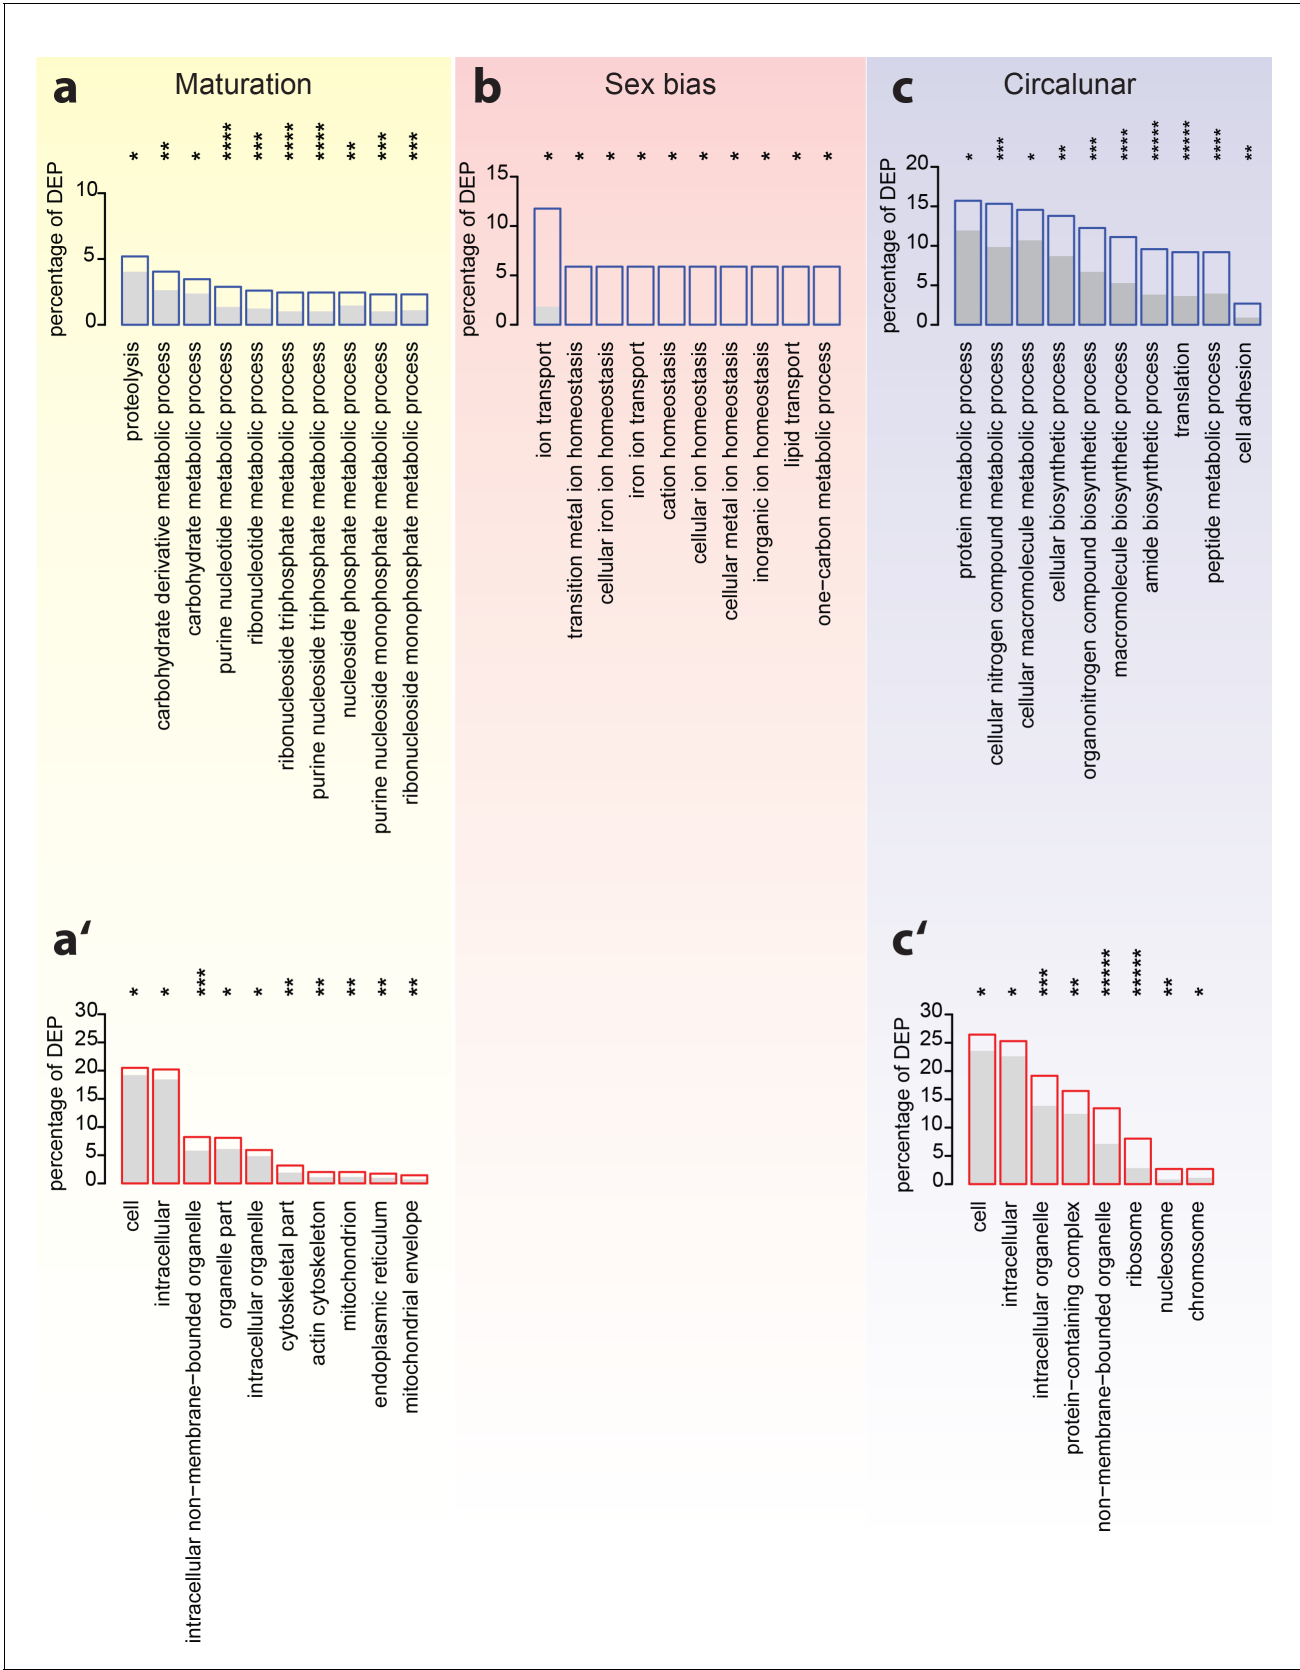

**Figure 5—figure supplement 2.** Analyses of over-represented GO-terms support the existence of distinct molecular signatures for maturation, sex and circalunar clock phase. GO-term enrichment analyses confirm the distinct regulation of the head proteome during the different tested biological processes. *Figure 5—figure supplement 2 continued on next page*

Figure 5—figure supplement 2 continued

processes. (a–c) The top ten most abundant terms in Biological Process (a,b,c) and Cellular Compartment (a',c') categories for DEPs identified by comparison between maturation stages (a,a'), sexes (b) and circalunar phase (c,c'). Blue (a,b,c) or red boxes (a',c') show the percentage of differentially expressed proteins for each term; the grey bars depict the expected amount of proteins per category. (a–c) top 10 enriched terms in the Biological Process category; blue boxes: percentage of differentially expressed transcripts for each term; the grey bars: expected numbers of transcripts per category. Maturation: proteolysis, GO:0006508, carbohydrate derivative metabolic process: GO:1901135, carbohydrate metabolic process: GO:0005975, purine nucleotide metabolic process: GO:0006163, ribonucleotide metabolic process: GO:0009259, ribonucleoside triphosphate metabolic process: GO:0009199, purine nucleoside triphosphate metabolic process: GO:0009144, nucleoside phosphate metabolic process: GO:0006753, purine nucleoside monophosphate metabolic process: GO:0009126, ribonucleoside monophosphate metabolic process: GO:0009161. Sex bias: ion transport: GO:0006811, transition metal ion homeostasis: GO:0055076, cellular iron ion homeostasis: GO:0006879, iron ion transport, GO:0006826, cation homeostasis: GO:0055080, cellular ion homeostasis: GO:0006873, cellular metal ion homeostasis: GO:0006875, inorganic ion homeostasis: GO:0098771, lipid transport: GO:0006869, one-carbon metabolic process: GO:0006730. Circalunar phase: protein metabolic process: GO:0019538, cellular nitrogen compound metabolic process: GO:0034641, cellular macromolecule metabolic process: GO:0044260, cellular biosynthetic process: GO:0044249, organonitrogen compound biosynthetic process: GO:1901566, macromolecule biosynthetic process: GO:0009059, amide biosynthetic process: GO:0043604, translation: GO:0006412, peptide metabolic process: GO:0006518, cell adhesion: GO:0007155. (a'–c') In analogy to (a–c), these panels list the top 10 enriched terms in the Cellular Compartment category. Red boxes: percentage of differentially expressed transcripts for each term; the grey bars: expected values of transcripts per category. Maturation: cell: GO:0005623, intracellular: GO:0005622, intracellular non-membrane-bounded organelle: GO:0043232, organelle part: GO:0044422, intracellular organelle: GO:0043229, cytoskeletal part: GO:0044430, actin cytoskeleton: GO:0015629, mitochondrion: GO:0005739, endoplasmic reticulum: GO:0005783, mitochondrial envelope: GO:0005740. Sex bias: no significantly enriched GO-terms at  $\alpha \leq 0.05$ . Circalunar phase: cell: GO:0005623, intracellular: GO:0005622, intracellular organelle: GO:0043229, protein-containing complex: GO:0032991, non-membrane-bounded organelle: GO:0043228, ribosome: GO:0005840, nucleosome: GO:0000786, chromosome: GO:0005694. Statistical significance was tested with a hypergeometric test implemented in the GOSTats package. \* $p < 0.05$ , \*\* $p < 0.01$ , \*\*\* $p < 0.001$ , \*\*\*\* $p < 0.0001$ , \*\*\*\*\* $p < 0.00001$ .

DOI: <https://doi.org/10.7554/eLife.41556.044>



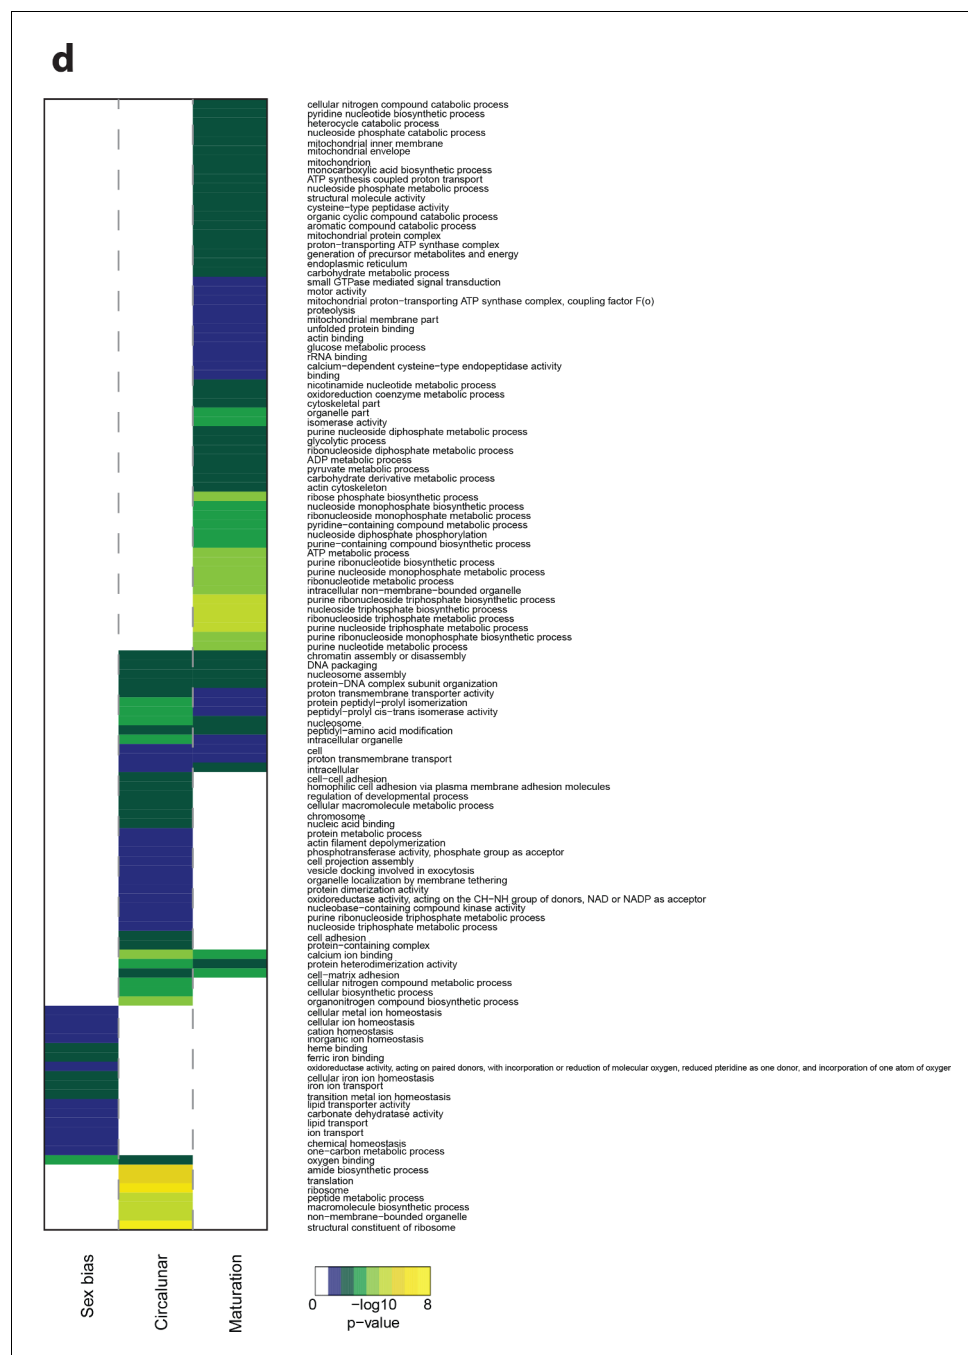

**Figure 5—figure supplement 3.** Heat map displaying over-represented GO-terms in all categories. The heat map is subdivided (columns) by the regulation of each GO-term by circalunar clock phase (left), sex (middle) and/or maturation (right); colours are indicative of the enrichment p-value as calculated by a hypergeometric G test implemented in the GOSTats package.

DOI: <https://doi.org/10.7554/eLife.41556.045>

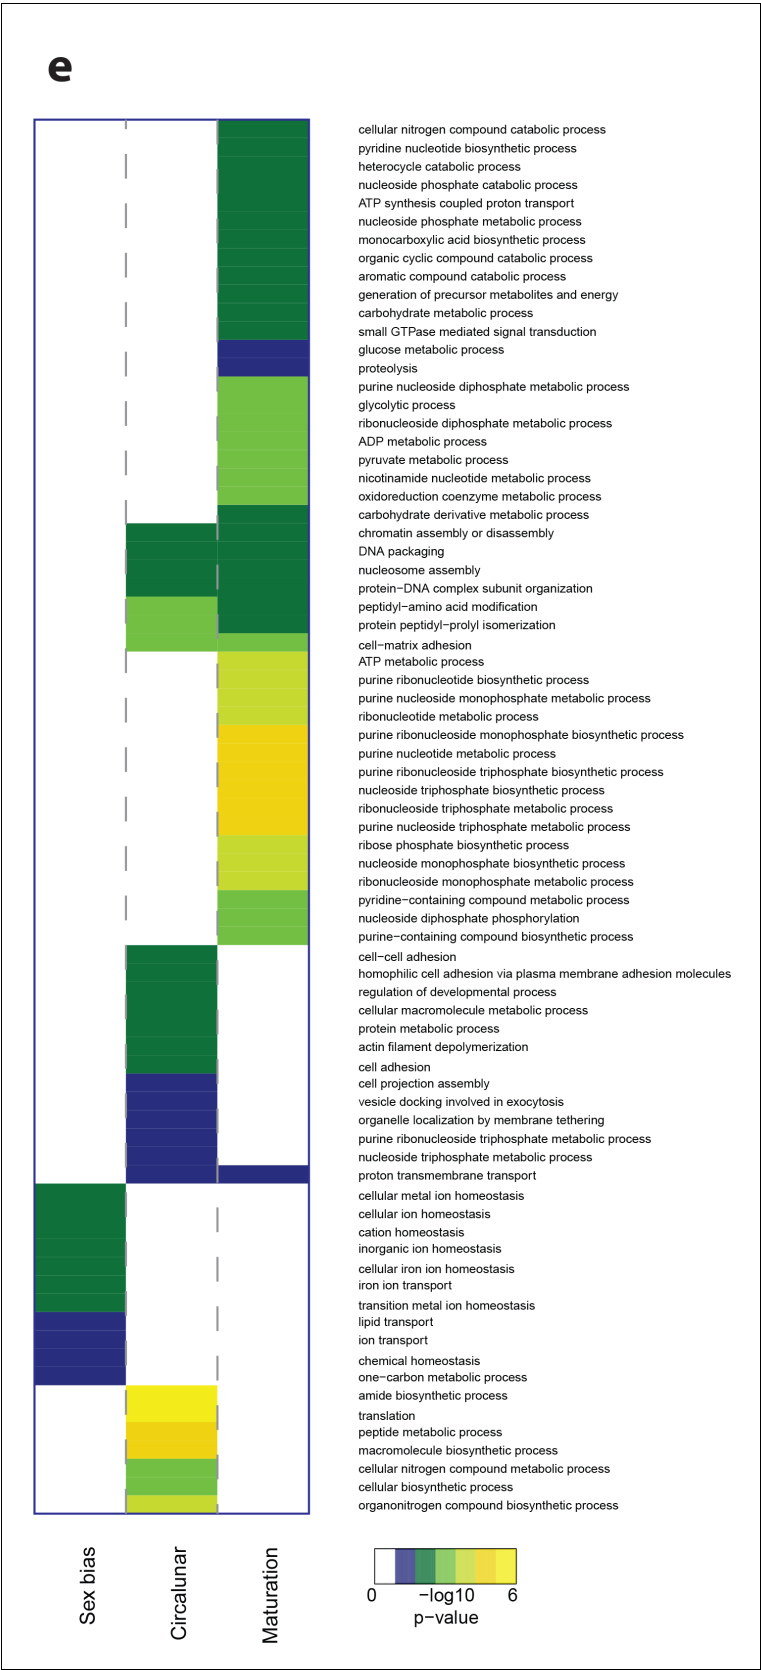

**Figure 5—figure supplement 4.** Heat map displaying over-represented GO-terms in the Biological Process Category. The heat map is subdivided (columns) by the regulation of each GO-term by circalunar clock phase  
*Figure 5—figure supplement 4 continued on next page*

*Figure 5—figure supplement 4 continued*

(left), sex (middle) and/or maturation (right); colours are indicative of the enrichment p-value as calculated by a hypergeometric test implemented in the GOSets package.

DOI: <https://doi.org/10.7554/eLife.41556.046>

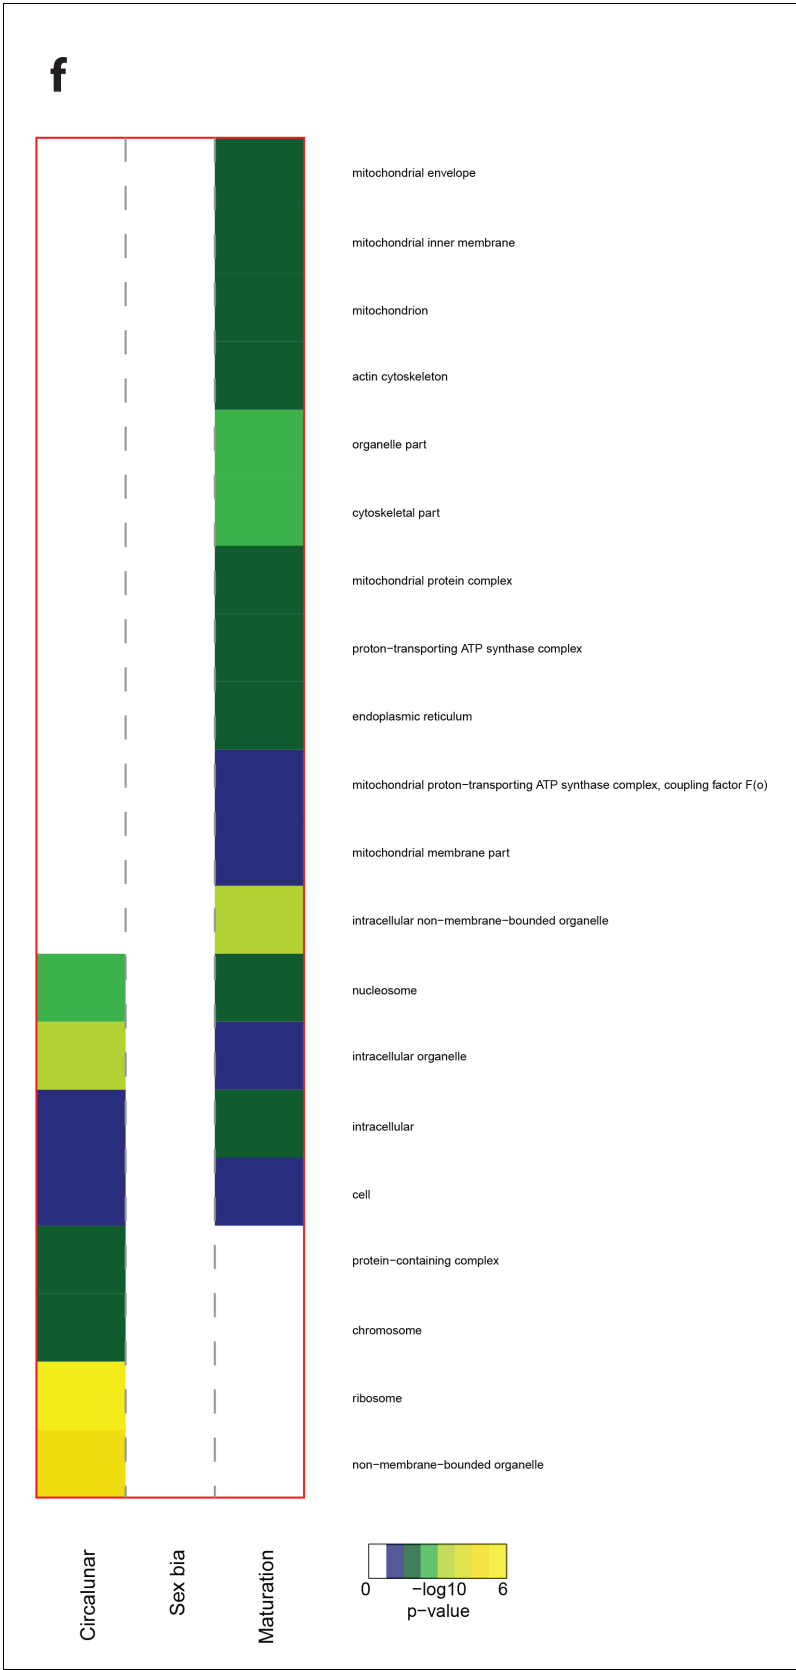

**Figure 5—figure supplement 5.** Heat map displaying over-represented GO-terms in the Cellular Compartment Category. The heat map is subdivided (columns) by the regulation of each GO-term by circalunar clock phase  
*Figure 5—figure supplement 5 continued on next page*

*Figure 5—figure supplement 5 continued*

(left), sex (middle) and/or maturation (right); colours are indicative of the enrichment p-value as calculated by a hypergeometric test implemented in the GOSets package.

DOI: <https://doi.org/10.7554/eLife.41556.047>

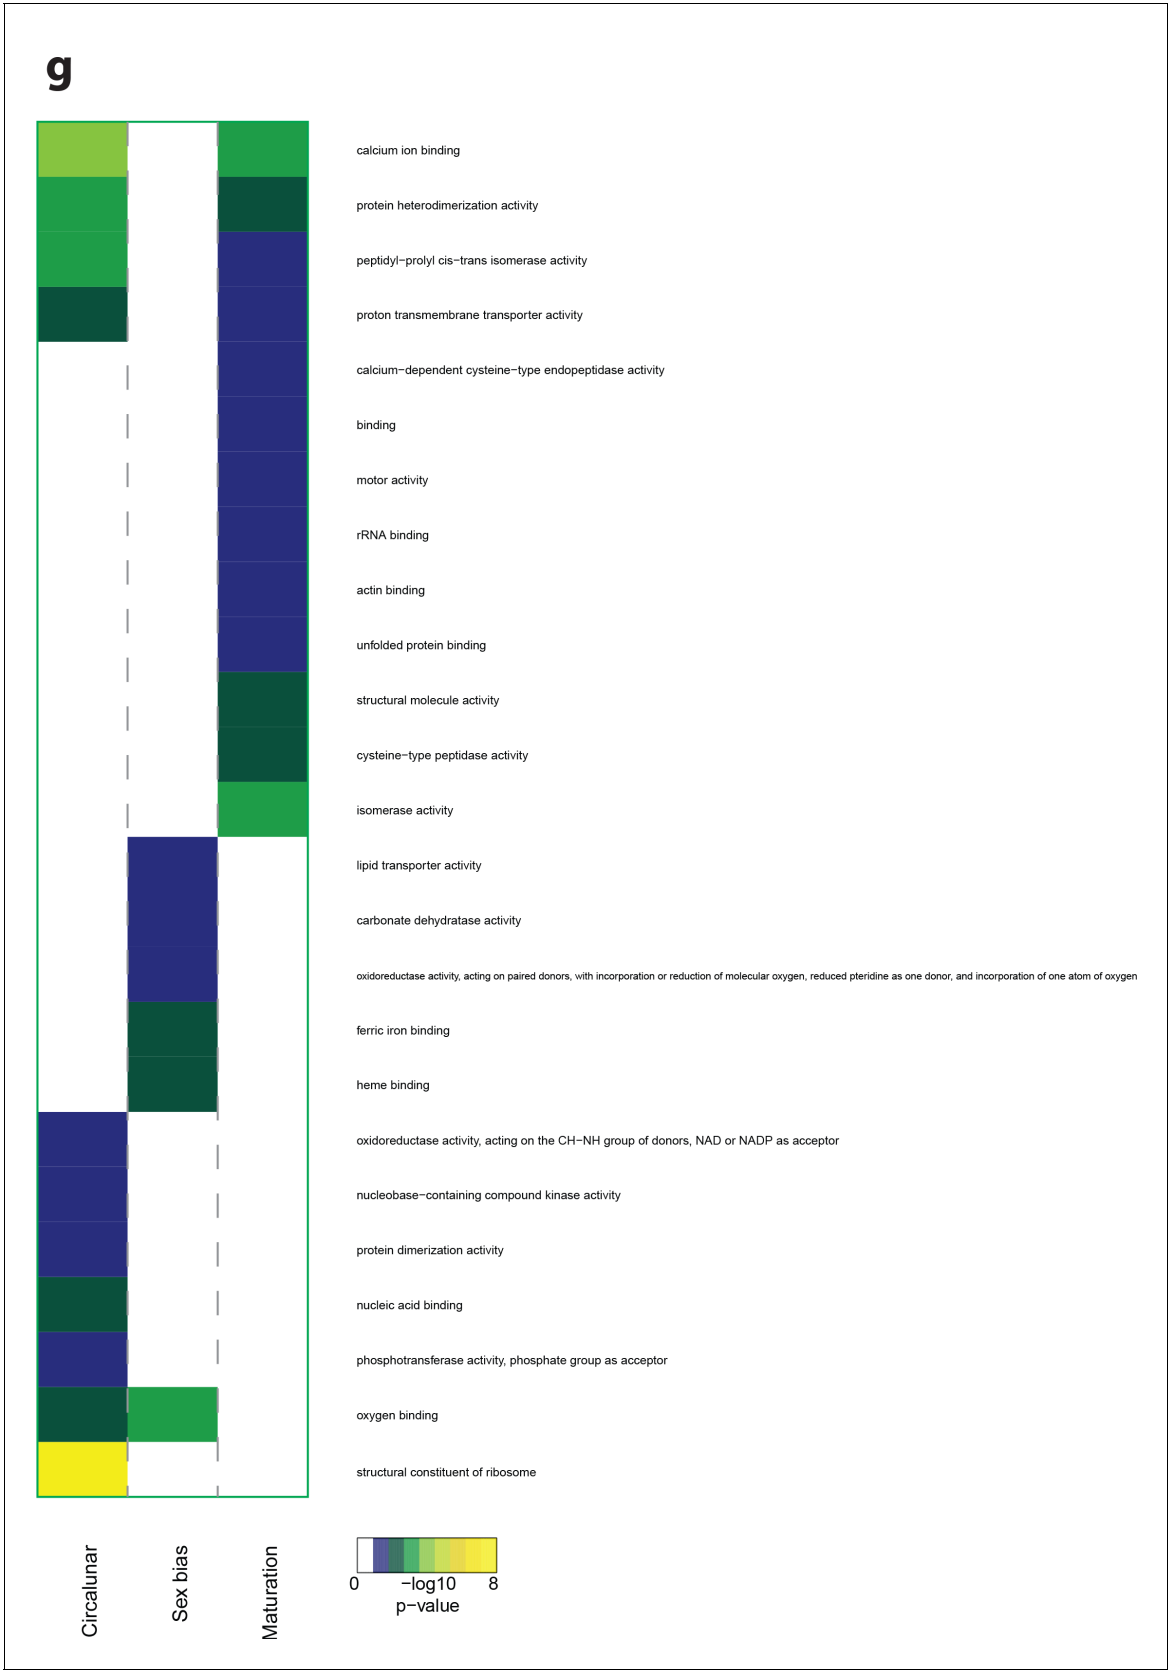

**Figure 5—figure supplement 6.** Heat map displaying over-represented GO-terms in the Cellular Compartment Category. The heat map is subdivided (columns) by the regulation of each GO-term by circalunar clock phase (left), sex (middle) and/or maturation (right); colours are indicative of the enrichment p-value as calculated by a hypergeometric test implemented in the GOSTats package.

DOI: <https://doi.org/10.7554/eLife.41556.048>

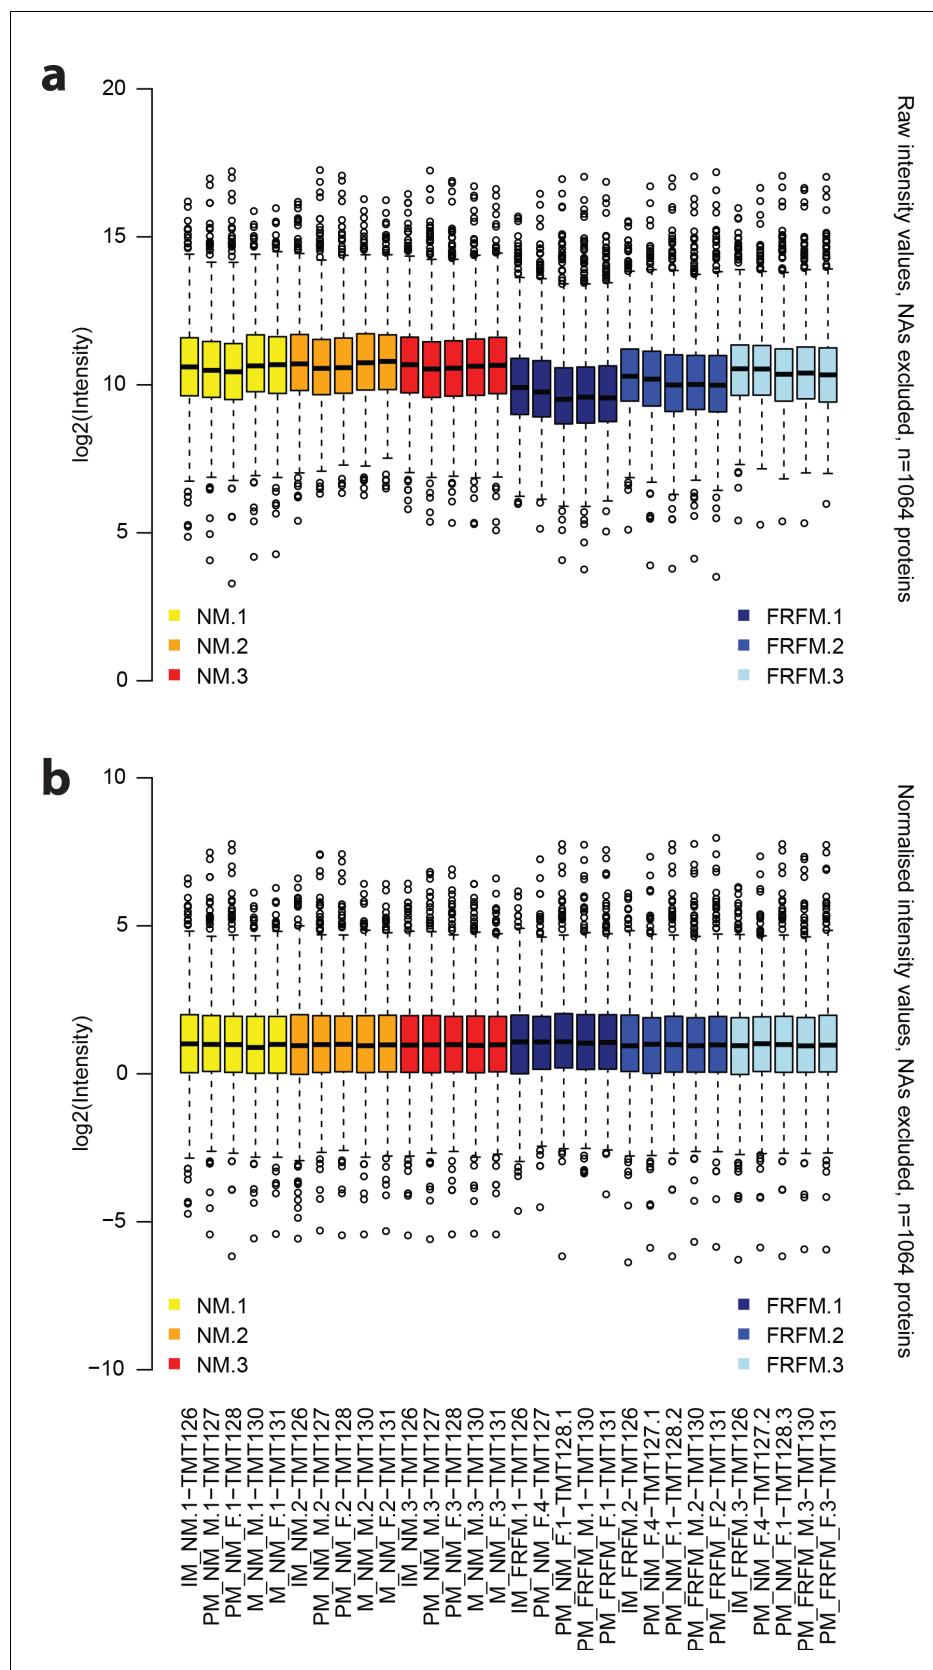

**Figure 5—figure supplement 7.** The normalisation procedure applied to the raw protein abundance values leads to evenly spread and centred abundance profiles. (a) Raw intensity values for each of the proteome measurements, excluding missing data. (b) corresponding abundance values after normalisation. *Figure 5—figure supplement 7 continued on next page*



*Figure 5—figure supplement 7 continued*

normalisation. Annotations on the x axis in **(b)** also correspond to the respective columns in **(a)**. Yellow: NM samples BR1, orange: NM samples BR2, red: NM samples BR3, dark blue: FRFM samples BR1, blue: FRFM samples BR2, light blue: FRFM samples BR3. Suffices TMT\_XYZ denote the label, used for labelling the respective sample, that is TMT126 is labelled with a tandem mass tag with the reporter mass of 126 Da.

DOI: <https://doi.org/10.7554/eLife.41556.049>

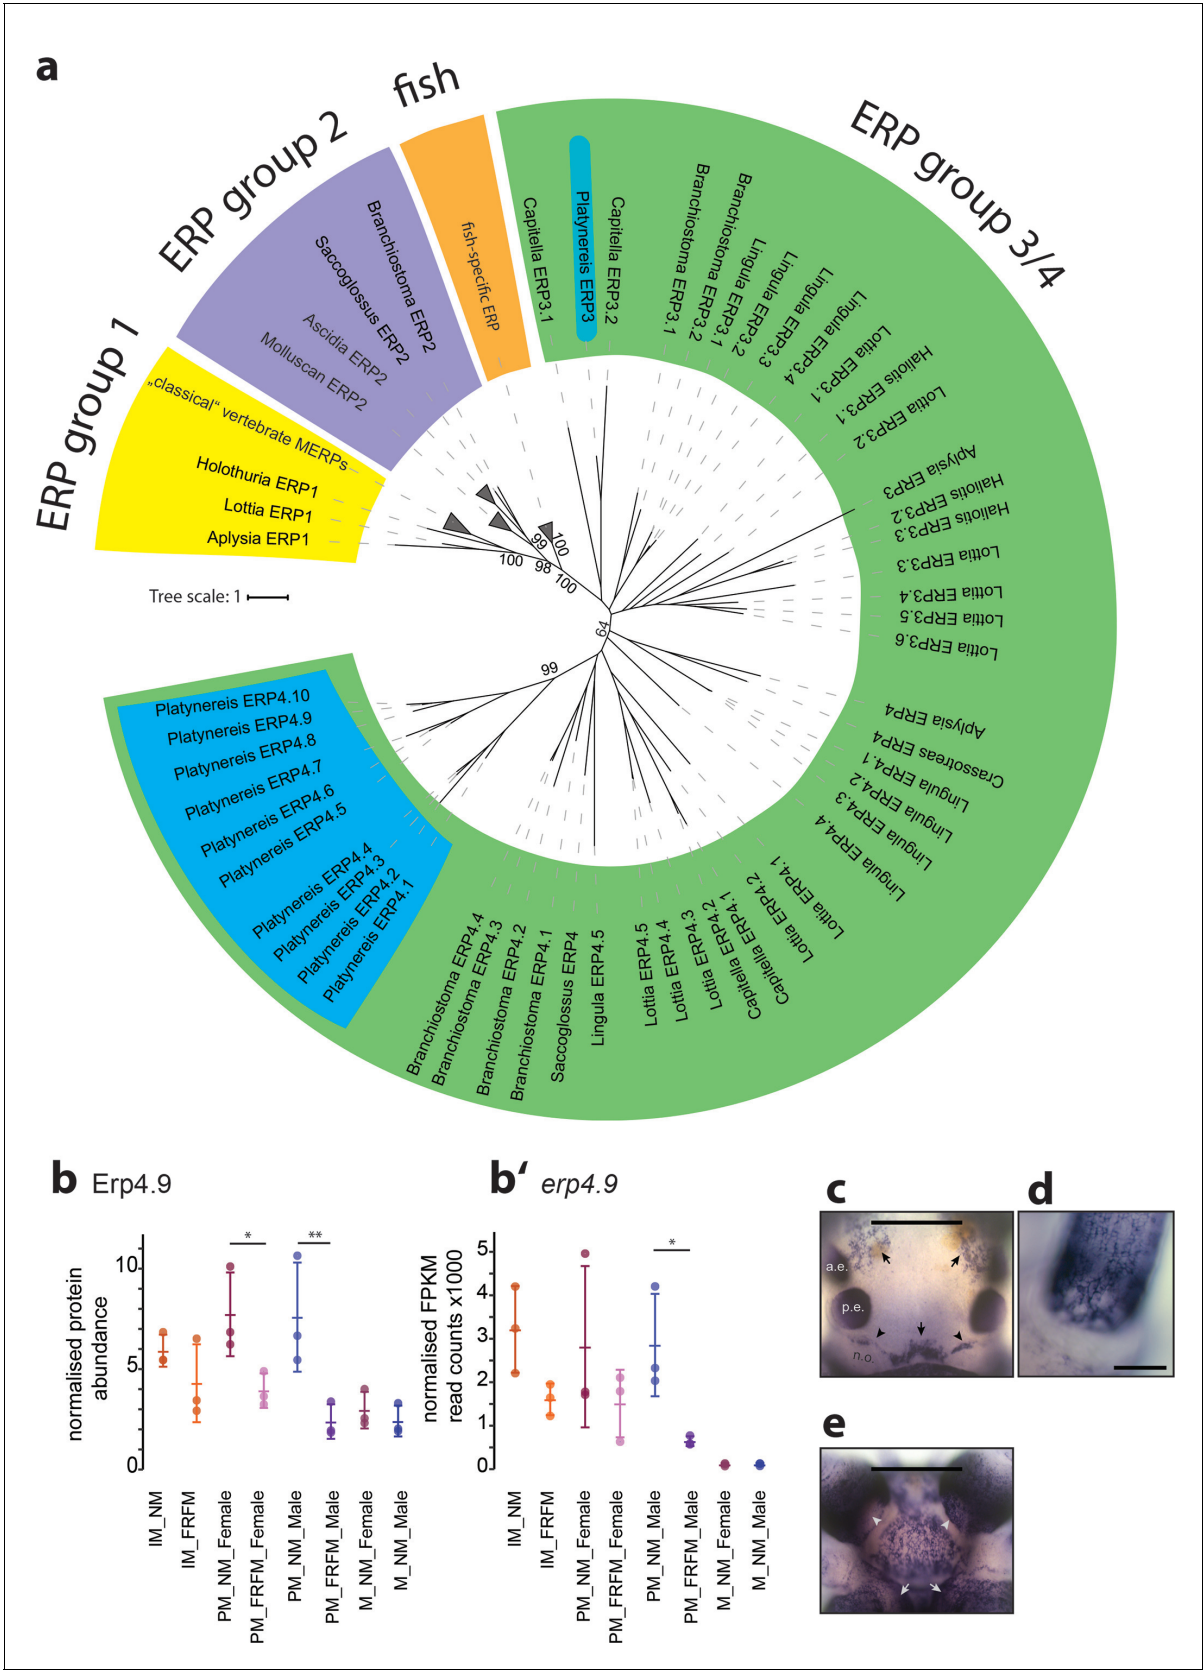

## Figure 6 continued

**Arrarás, 2007** including eleven of 15 *Platynereis* Ependymin-related proteins (ERP4.1–4.10; ERP3; blue boxes) and various additional invertebrate Ependymin sequences. The phylogeny reveals four distinct groups of Ependymin-related proteins (ERP) that are termed ERP1, ERP2, ERP3/4 and fish-specific ERPs; group-specific expansions of ERPs is observed at several places in the phylogeny. All identified *Platynereis* Ependymins (blue) fall into the ERP3/4 clade. A full tree with un-collapsed nodes, the alignment, NCBI accession numbers and the *Platynereis* sequence identifiers are provided in **Figure 6—figure supplement 1** and **Figure 6—source data 1** and **2**. **(b,b')** Protein and RNA-Seq expression profiles validate *Platynereis* ERP4.9 as a new target of circalunar phase on RNA and protein level. **(b)** Normalised protein expression profile; **(b')** DESeq2 normalised RNA expression profile. The graphs show the arithmetic mean with standard deviation, together with individual data points. **(c–e)** RNA expression pattern of *erp4.9* in immature adult *Platynereis* heads. a.e.: anterior eye; p.e.: posterior eye; n.o.: nuchal organ. **(c)** Dorsal view, anterior to the top. Characteristic expression is observed around the dorsal blood vessel (central arrow), anterior of the nuchal organ (arrowheads) and next to the anterior eyes (arrows). Scale bar: 250  $\mu\text{m}$ . **(d)** Dorsal view of the base of a prostomial cirrus, scale bar: 50  $\mu\text{m}$ . **(e)** Ventral view, anterior to the top. Expression is observed in a plate-like structure at the bottom of the head, as well as around the mouth opening (arrows) and the palps (arrow heads). Scale bar: 250  $\mu\text{m}$ . For additional circalunar-regulated ERPs see **Figure 6—figure supplement 2** and **Figure 5—source data 16** and **17**.

DOI: <https://doi.org/10.7554/eLife.41556.071>

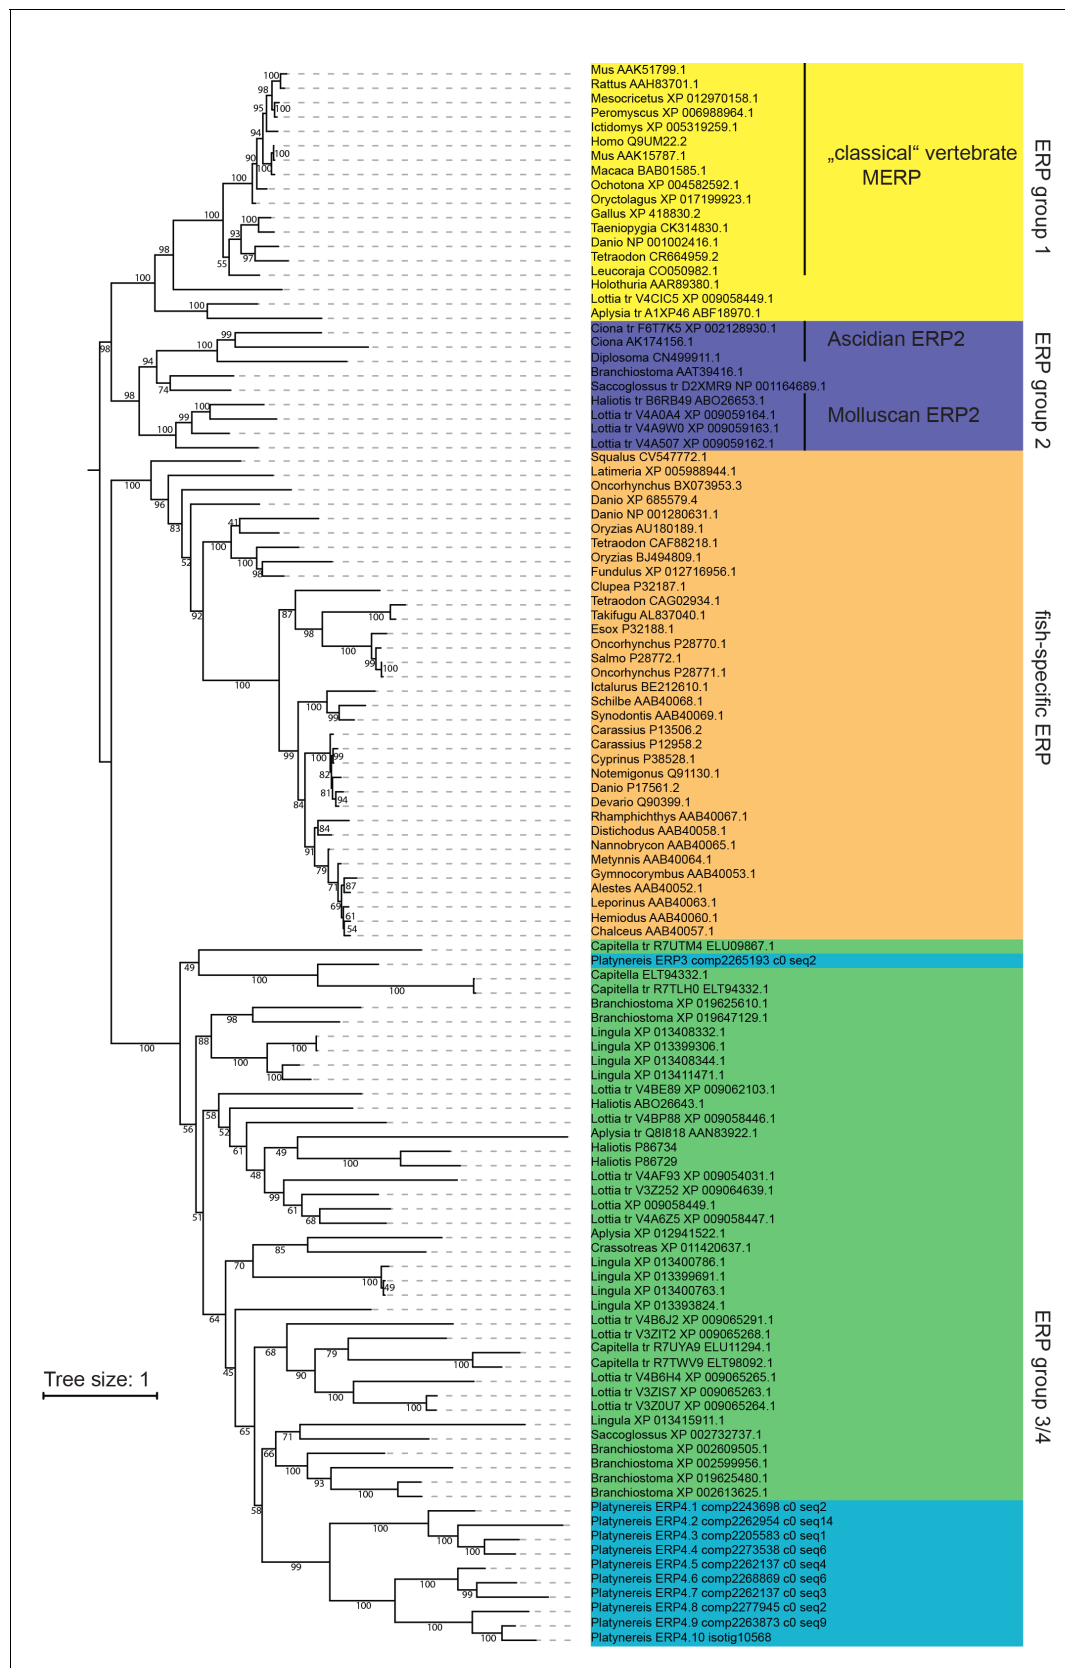

**Figure 6—figure supplement 1.** Maximum likelihood phylogeny of Ependymin-related proteins using the same alignment and settings as in **Figure 6a**. For better visibility, the tree is shown as rooted at the split between ERP group one and ERP group 2. *Platynereis* sequences are labelled **Figure 6—figure supplement 1 continued on next page**

*Figure 6—figure supplement 1 continued*

with a systematic nomenclature following the apparent phylogeny, all other entries are labelled with genus\_and Accession-Number. For cases in which translated (tr) genomic regions were initially used, two accession numbers are given.

DOI: <https://doi.org/10.7554/eLife.41556.072>

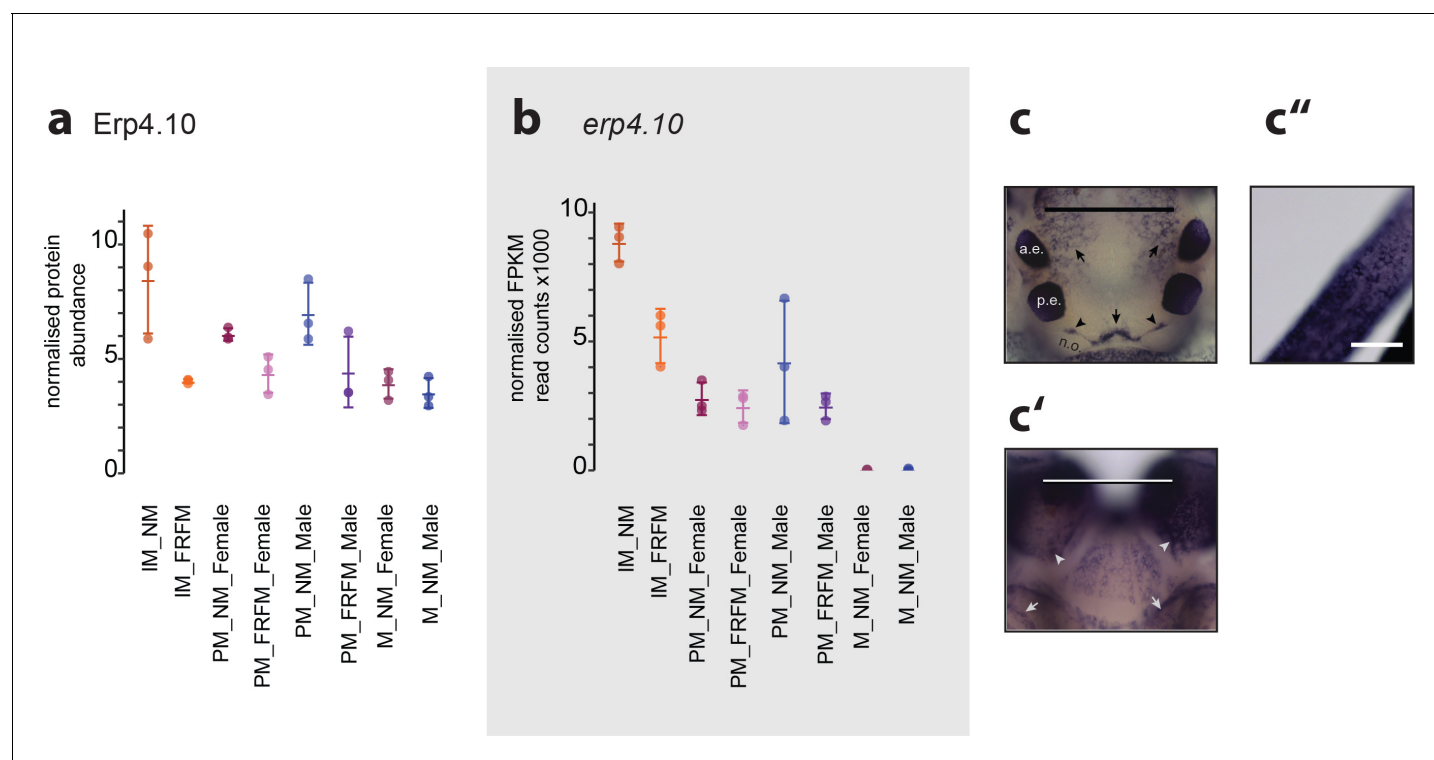

**Figure 6—figure supplement 2.** ERP4.10 is regulated in both protein and RNA expression by circalunar phase. (a,b) Normalised values for abundance of ERP4.10 on protein (a) and RNASeq (b) level. (c–c'') Results of a whole mount in-situ hybridisation on immature *Platynereis* heads. a.e.: anterior adult eye; p.e.: posterior adult eye; n.o.: nuchal organ. (c) Dorsal view, anterior to the top. Characteristic expression is observed around the dorsal blood vessel (central arrow), anterior of the nuchal organ (arrow heads) and next to the anterior adult eyes (arrows). Scale bar: 250  $\mu$ m. (c') Ventral view, anterior to the top. Expression is observed in a plate-like structure at the bottom of the head. Scale bar: 250  $\mu$ m. (c'') Dorsal view of cirrus; Scale bar: 50  $\mu$ m.

DOI: <https://doi.org/10.7554/eLife.41556.073>

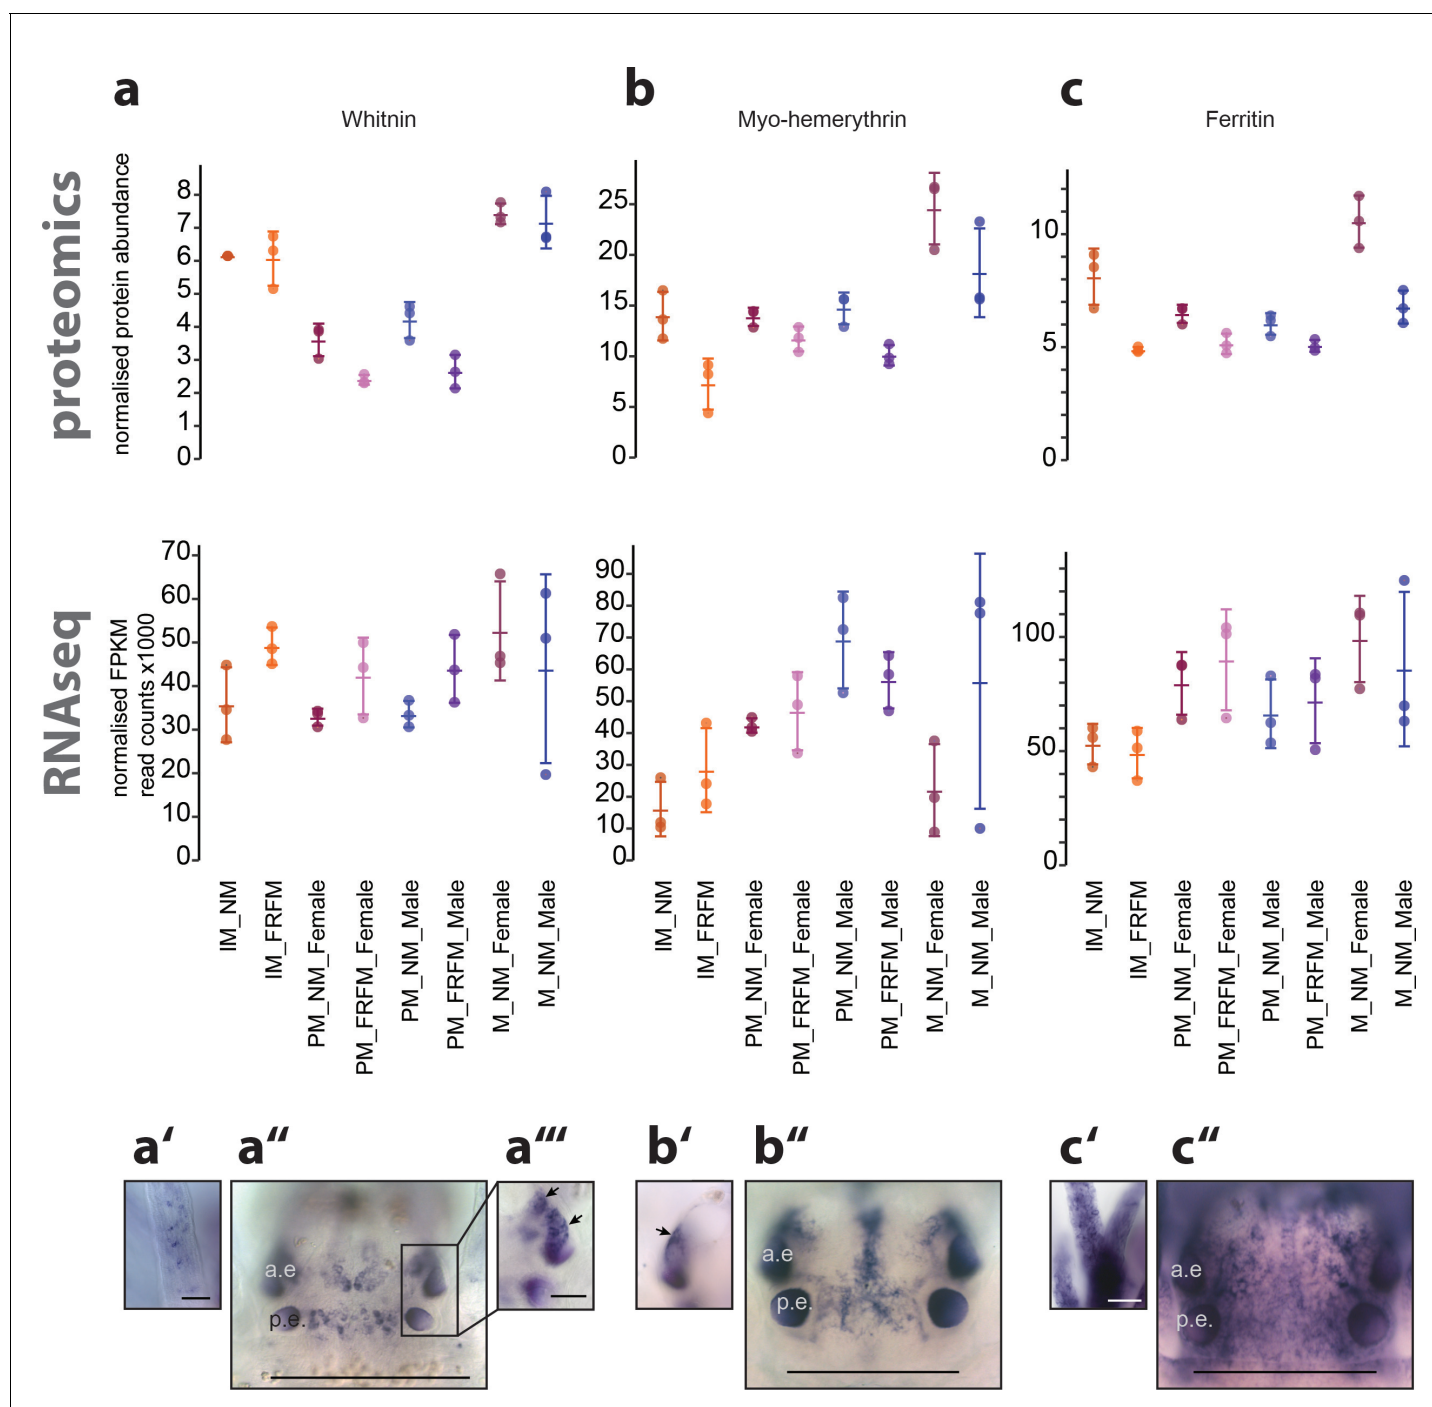

**Figure 7.** Proteome analyses reveal additional molecular markers for circalunar phase with distinct expression profiles and proposed functions. (a–a''') The neuropeptide Whitnin, a'– peristomeal cirrus, a''– head, a'''– induced head expression in a'' with different focus. (b–b'') The oxygen storage protein Haemerythrin, b'– head, b''– lateral head aspects below the focal plane of b'. (c–c'') The iron storage protein Ferritin. c'– peristomeal cirrus (a–c) compares the normalised protein expression profiles (top, 'proteomics') with the corresponding DESeq2 normalised mRNA expression profile (bottom, 'RNA-Seq'). All graphs show the arithmetic mean with standard deviation, and the individual data points. (a'–c'') Expression domains as characterised by whole-mount in situ hybridisation; (a'', b'', c'') dorsal views of immature *Platynereis* heads stained with riboprobes of the corresponding transcript; All images are oriented with the anterior side to the top; scale bar: 250  $\mu$ m. a.e.: anterior eye, p.e.: posterior eye.

DOI: <https://doi.org/10.7554/eLife.41556.076>

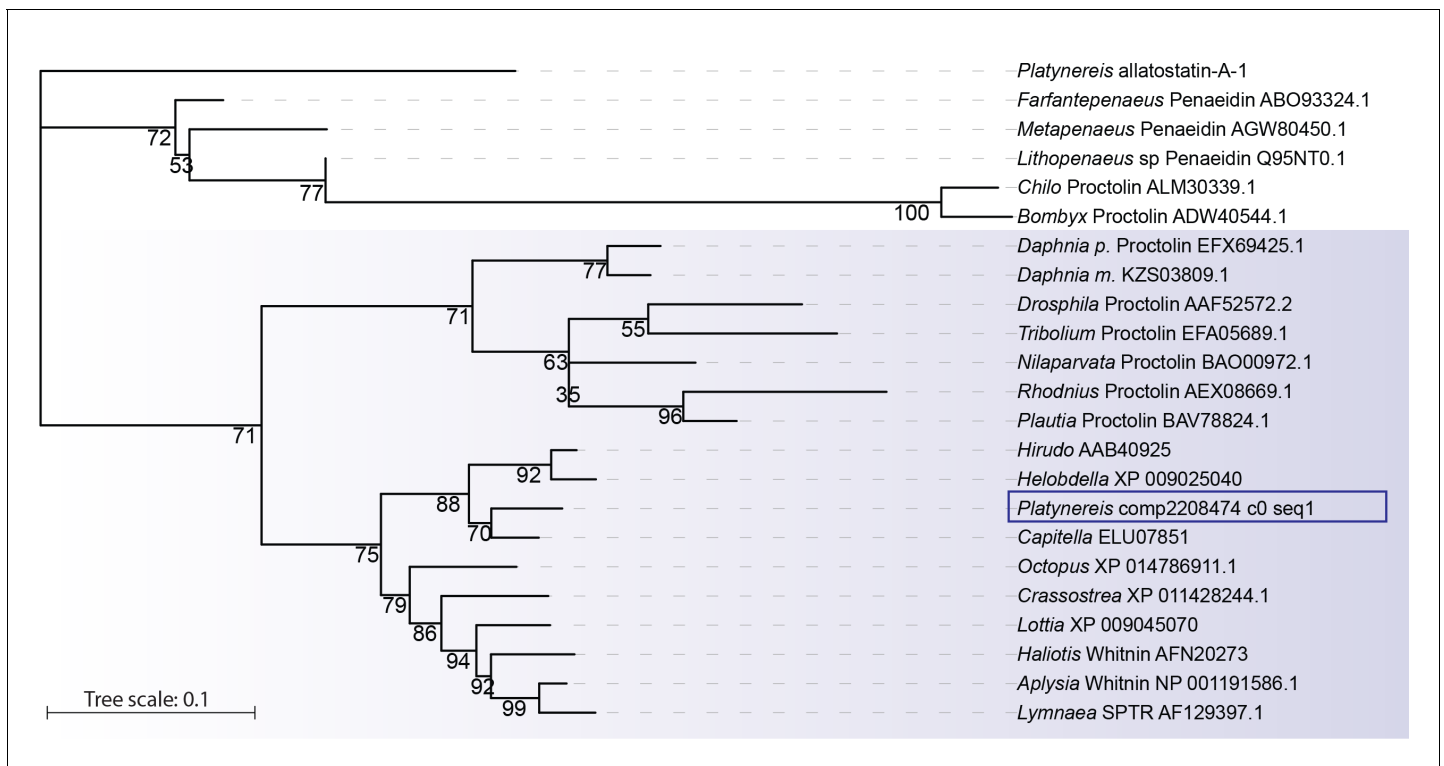

**Figure 7—figure supplement 1.** *Platynereis* Whitnin is part of a Proctolin/Whitnin family of neuropeptides. Maximum likelihood phylogeny of Proctolin/Whitnin family, see **Figure 7—source data 1** and **2** for alignment and Accession numbers.

DOI: <https://doi.org/10.7554/eLife.41556.077>
